# Supplementary material for: Genomic Assessment of the Contribution of the Wolbachia Endosymbiont of Eurosta solidaginis to Gall Induction
Source: MDPI journal article supplement (doi:10.3390/ijms24119613), 2023-06-01

**Supplemental Figure S1.** Methyl erythritol phosphate (MEP) pathway enzymes and intermediates. Pathway and enzymes abbreviations follow KEGG pathway map 00900.

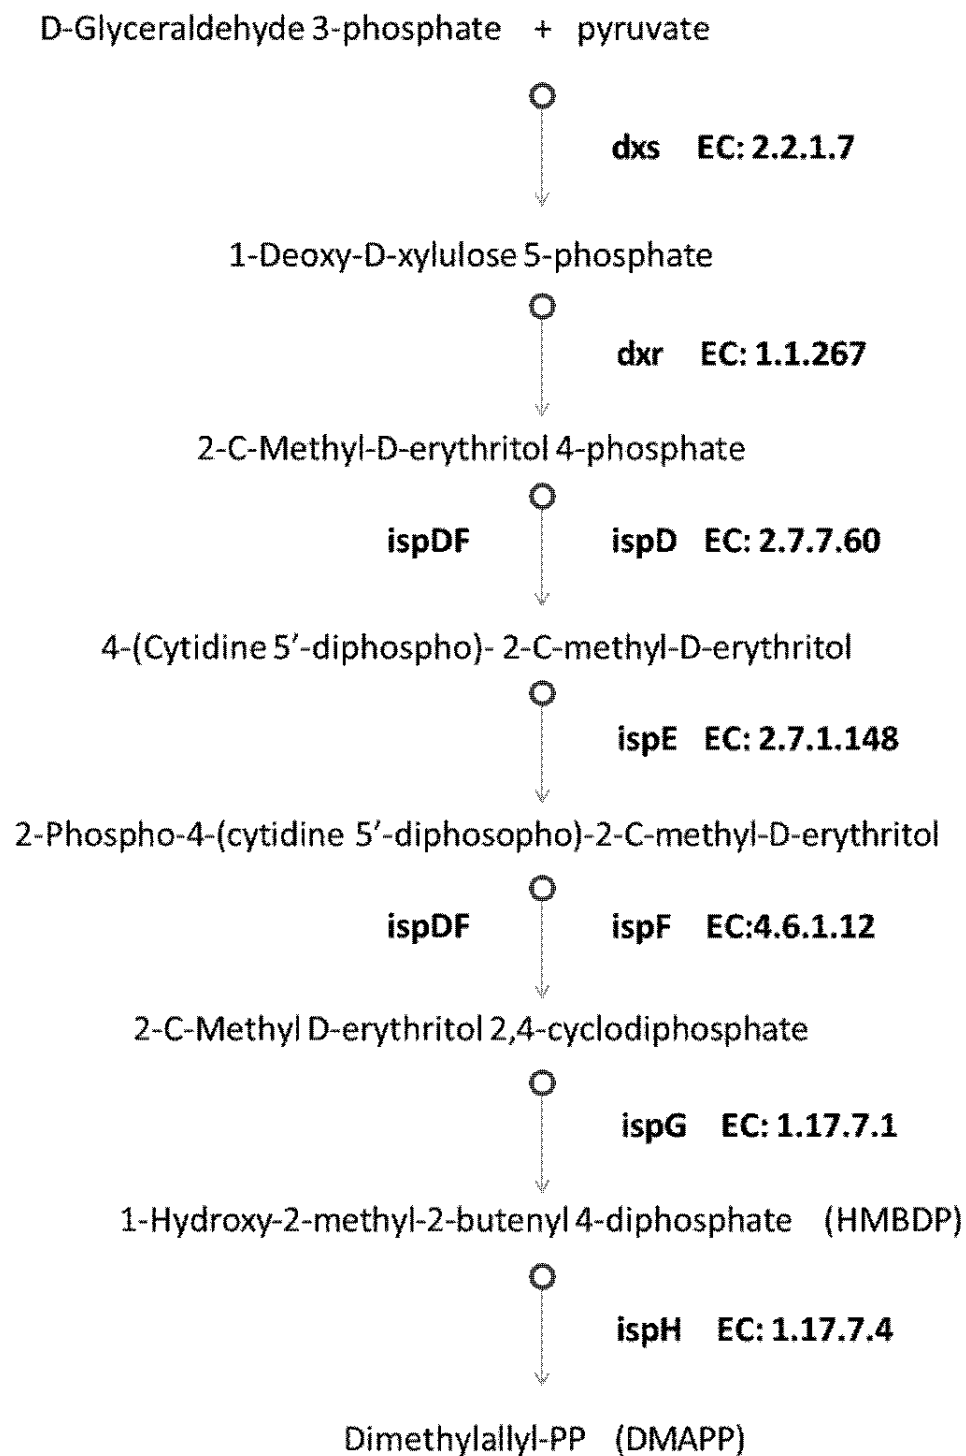

**Supplemental Figure S2.** S-Adenosyl-L-methionine (SAM) pathway enzymes and intermediates. KEGG EC numbers represent enzymes. Figure based on KEGG pathway map 00270. Red text indicates enzymes missing from *wEsol* genome.

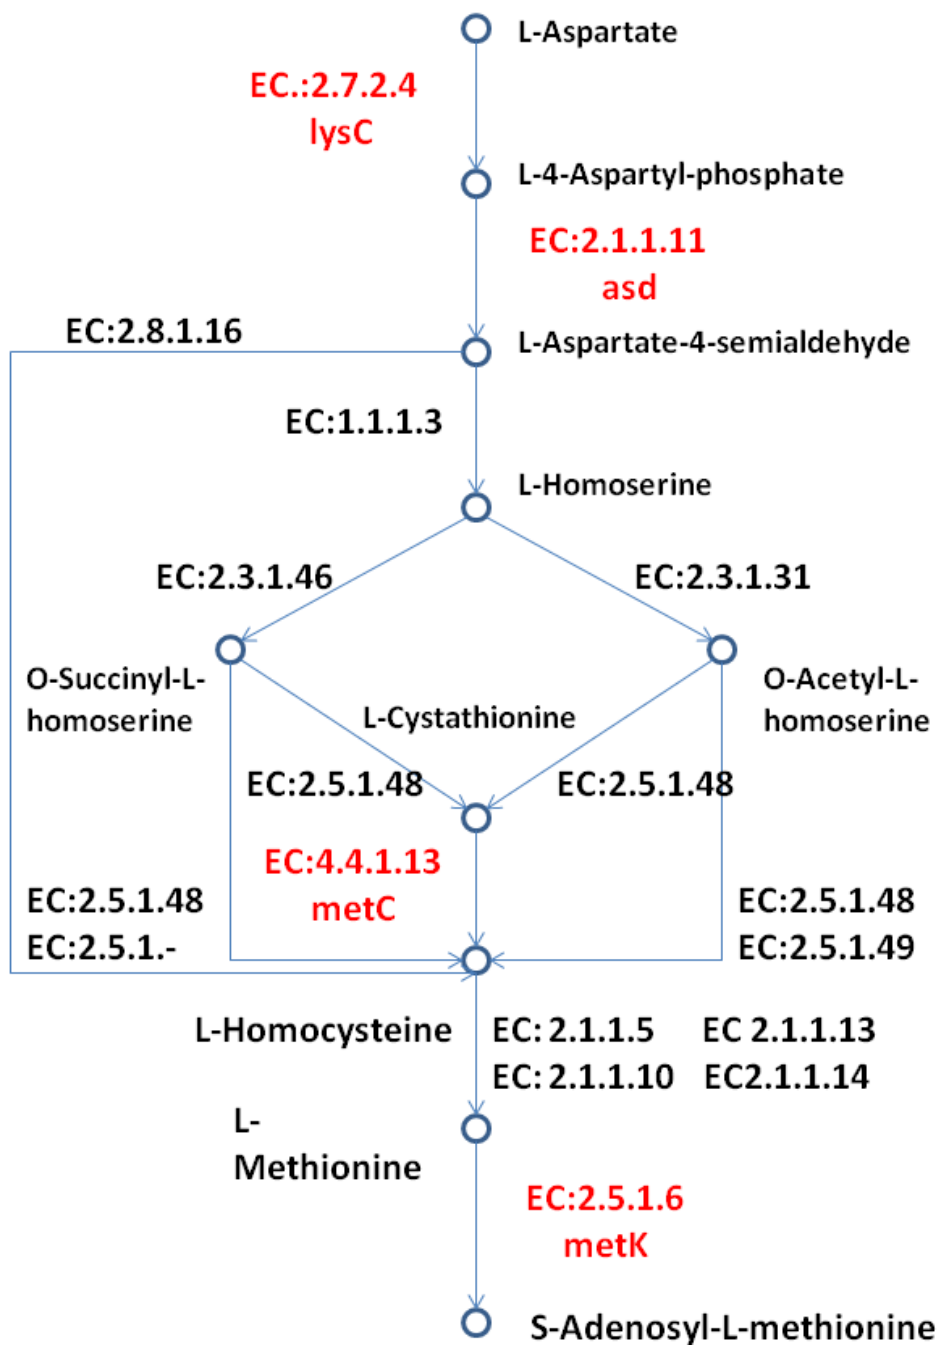

Supplement: s1 [file s1]
