# Supplementary material for: Genomic Assessment of the Contribution of the Wolbachia Endosymbiont of Eurosta solidaginis to Gall Induction
Source: MDPI journal article supplement (doi:10.3390/ijms24119613), 2023-06-01
Supplement: s1 [file s1]

**Supplemental Table S7. KEGG EC and KO number for MEP pathway for DMAPP and HMDBP synthesis enzymes**

| <b>KEGG EC Number</b>     | <b>KEGG KO Number</b> | <b>Enzyme</b>                                                                                                                                                                   | <b>Abbreviation</b> |
|---------------------------|-----------------------|---------------------------------------------------------------------------------------------------------------------------------------------------------------------------------|---------------------|
| EC:2.2.1.7                | K01662                | 1-deoxy-D-xylulose-5-phosphate synthase                                                                                                                                         | dxs                 |
| EC: 1.1.1.267             | K00099                | 1-deoxy-D-xylulose-5-phosphate reductoisomerase                                                                                                                                 | dxr                 |
| EC:2.7.7.60               | K00991, K12506        | 2-C-methyl-D-erythritol 4-phosphate cytidylyltransferase<br>2-C-methyl-D-erythritol 4-phosphate cytidylyltransferase /<br>2-C-methyl-D-erythritol 2,4-cyclodiphosphate synthase | ispD, ispDF         |
| EC:2.7.1.148              | K00919                | 4-diphosphocytidyl-2-C-methyl-D-erythritol kinase                                                                                                                               | ispE                |
| EC:4.6.1.12, EC: 2.7.7.60 | K01770, K12506        | 2-C-methyl-D-erythritol 2,4-cyclodiphosphate synthase<br>2-C-methyl-D-erythritol 4-phosphate cytidylyltransferase /<br>2-C-methyl-D-erythritol 2,4-cyclodiphosphate synthase    | ispF, ispDF         |
| EC:1.17.7.1, EC: 1.17.7.3 | K03526                | (E)-4-hydroxy-3-methylbut-2-enyl-diphosphate synthase                                                                                                                           | ispG, gcpE          |
| EC:1.17.7.4               | K03527                | 4-hydroxy-3-methylbut-2-en-1-yl diphosphate reductase                                                                                                                           | ispH, lytB          |
