# Supplementary material for: Genomic Assessment of the Contribution of the Wolbachia Endosymbiont of Eurosta solidaginis to Gall Induction
Source: MDPI journal article supplement (doi:10.3390/ijms24119613), 2023-06-01
Supplement: s1 [file s1]

LOCUS JAQZAU010000001 5193 bp dna linear ENV 17-MAR-2023  
 DEFINITION MAG: Wolbachia pipientis isolate wEsol contig\_10007, whole genome  
 shotgun sequence.  
 ACCESSION JAQZAU010000001 JAQZAU010000000  
 VERSION JAQZAU010000001.1  
 DBLINK BioProject: PRJNA929258  
 BioSample: SAMN33142973  
 KEYWORDS WGS; ENV; Metagenome Assembled Genome; MAG.  
 SOURCE Wolbachia pipientis (insect metagenome)  
 ORGANISM Wolbachia pipientis  
 Bacteria; Pseudomonadota; Alphaproteobacteria; Rickettsiales;  
 Anaplasmataceae; Wolbachieae; Wolbachia.  
 REFERENCE 1 (bases 1 to 5193)  
 AUTHORS Fiutek,N., Couger,B.M., Roy,S., de la Torre,J.R. and Connor,E.F.  
 TITLE Genomic assessment of the contribution of the Wolbachia  
 endosymbiont of Eurosta solidaginis to gall-induction  
 JOURNAL International Journal Molecular Sciences  
 REFERENCE 2 (bases 1 to 5193)  
 AUTHORS Fiutek,N., Couger,B.M., Roy,S., de la Torre,J.R. and Connor,E.F.  
 TITLE Direct Submission  
 JOURNAL Submitted (10-FEB-2023) Biology, San Francisco State University,  
 1600 Holloway Ave, San Francisco, CA 94132, USA  
 COMMENT ##Genome-Assembly-Data-START##  
 Assembly Date :: JUN-2019  
 Assembly Method :: FLYE v. 06-2019  
 Genome Representation :: Full  
 Expected Final Version :: Yes  
 Genome Coverage :: 100.0x  
 Sequencing Technology :: Illumina HiSeq; PacBio Sequel  
 ##Genome-Assembly-Data-END##  
 FEATURES Location/Qualifiers  
 source 1..5193  
 /organism="Wolbachia pipientis"  
 /mol\_type="genomic DNA"  
 /submitter\_seqid="contig\_10007"  
 /isolate="wEsol"  
 /isolation\_source="galls on Solidago altissima"  
 /host="Eurosta solidaginis MN-2018-EFC"  
 /db\_xref="taxon:955"  
 /environmental\_sample  
 /country="USA: Cowling Arboretum, Carleton College,  
 Northfield, MN"  
 /lat\_lon="44.48 N 93.13 W"  
 /altitude="280 m"  
 /collection\_date="2018-11"  
 /metagenome\_source="insect metagenome"  
 /note="metagenomic"  
 gene <1..136  
 /locus\_tag="wEsol\_00001"  
 CDS <1..136  
 /locus\_tag="wEsol\_00001"  
 /codon\_start=1  
 /transl\_table=11  
 /product="hypothetical protein"  
 /translation="XLKYWRFLCFKRLTSEIQLLLIATNLRCKCLRNLLSRKKDKESPS"  
 gene complement(212..391)  
 /locus\_tag="wEsol\_00002"  
 CDS complement(212..391)  
 /locus\_tag="wEsol\_00002"  
 /codon\_start=1

```

/transl_table=11
/product="hypothetical protein"

/translation="MTNSASPLIITVKLLYLLSPICRLKGDYLMYRRLIFNFLQYIDTVCLYKTSSTSRLSK"
gene      complement(430..993)
          /locus_tag="wEsol_00003"
CDS       complement(430..993)
          /locus_tag="wEsol_00003"
          /codon_start=1
          /transl_table=11
          /fullproduct="qcoverage 100 , hcoverage 97.39583333333333
, similarity 100 , identity 99.5 , evaluate 9.54e-129 ,
alnlength 187 , Bacteria , Proteobacteria ,
WP_015588787.1 MULTISPECIES: RlmE family RNA
methyltransferase [Wolbachia]"
          /cog="FtsJ COG0293 205 23S rRNA methylase"
          /pfam="FtsJ Methyltransf_23 Methyltransf_31
Methyltransf_18 Methyltransf_11 NSP13"
          /tigr="TIGR00438 rrmJ 188 ribosomal RNA large subunit
methyltransferase J"
          /product="RlmE family RNA methyltransferase"
          /translation="MQKTSKDGYSRSAYKLVEMDNKFKLFQEGQKIIDLGASPGGWS
QVASQKGANVVALDIKPMNAINGVEFIQCDIINEFEILREKFKDQKFDVILSDMAPES
CGLKSLDHIRIMLLCEAALNFAKHFLSHGGTFVVKIFQGESDKDFCNELKKMFKTVKY
FKPKSSRSESTEMYLVSLGFIGSRLSI"
          /besthit="qcoverage 100 , hcoverage 97.39583333333333 ,
similarity 100 , identity 99.5 , evaluate 9.54e-129 ,
alnlength 187 , Bacteria , Proteobacteria ,
WP_015588787.1 MULTISPECIES: RlmE family RNA
methyltransferase [Wolbachia]"
gene      complement(1085..1660)
          /locus_tag="wEsol_00004"
CDS       complement(1085..1660)
          /locus_tag="wEsol_00004"
          /codon_start=1
          /transl_table=11
          /fullproduct="qcoverage 100 , hcoverage 100 , similarity
100 , identity 100 , evaluate 5.23e-111 , alnlength 191 ,
Bacteria , Proteobacteria , WP_010082598.1 MULTISPECIES:
DUF2497 domain-containing protein [Wolbachia]"
          /cog="COG3827 COG3827 231 Uncharacterized protein
conserved in bacteria"
          /pfam="DUF2497"
          /product="DUF2497 domain-containing protein"
          /translation="MHDEQGNQSVKDILEDIKKAISGKNASNDKAEIKDENDDVLYLE
EEYPEEIEEDGKKENNEKEDIDNDDQSEEMACNNNQFNGHSYNSEEKKDIYLYDNIQM
SNNKASNSGLQAQNNNDHLILKENMEEIKALLGKMQLQHKQKKANLTVEELVTSLL
KPQLSEWLNKYLHALVKEVVEKELKDIINNKK"
          /besthit="qcoverage 100 , hcoverage 100 , similarity 100
, identity 100 , evaluate 5.23e-111 , alnlength 191 ,
Bacteria , Proteobacteria , WP_010082598.1 MULTISPECIES:
DUF2497 domain-containing protein [Wolbachia]"
gene      complement(1680..2903)
          /locus_tag="wEsol_00005"
CDS       complement(1680..2903)
          /locus_tag="wEsol_00005"
          /codon_start=1
          /transl_table=11
          /fullproduct="qcoverage 100 , hcoverage 100 , similarity
100 , identity 100 , evaluate 2.14e-275 , alnlength 407 ,

```

Bacteria , Proteobacteria , WP\_006279873.1 MULTISPECIES:  
 TolC family protein [Wolbachia]"  
 /cog="TolC COG1538 457 Outer membrane protein"  
 /pfam="OEP OEP"  
 /tigr="TIGR01844 type\_I\_sec\_TolC 414 type I secretion  
 outer membrane protein, TolC family"  
 /product="TolC family protein"  
 /translation="MFRLLIITLAIIFNTISCYATDVGEVISKAIKNSSKIKSQFYQYK  
 SAEKHYKSSGLAGFLPDINLQYNFDSNFNLDLTSEKKLTLRQKLIDGGGTFATFSRSSH  
 LLKAEKMRFQQLKQELALNAV KAYVNV LQKTEILKLREHKERVSL EHL SAMKKRFS LG  
 EVTNAEVLLAKAKFSSSISERVDAEGKLKLVNIAYYHLIGEDADDLSEANDKLPSVPE  
 LNECLQLAKTNNLSLKA AVYQKRAAGMEVIAESSKWLP SLNLSASKNFGEDGMKV DKL  
 LENVHVVF TLDVPIFKRGVNAFGVSKAKMDAKKSTYDYETVKNIEQAVVNAWNNVLT  
 AKAI IKASQEA EKA AALALEGVEQEVN LNLKSTSDLLDTE DALFKARSD LVEAKSNYV  
 ISVYNLLFMINSIDL"  
 /besthit="qcoverage 100 , hcoverage 100 , similarity 100  
 , identity 100 , eval ue 2.14e-275 , alnlength 407 ,  
 Bacteria , Proteobacteria , WP\_006279873.1 MULTISPECIES:  
 TolC family protein [Wolbachia]"  
 gene 3033..3491  
 /locus\_tag="wEsol\_00006"  
 CDS 3033..3491  
 /locus\_tag="wEsol\_00006"  
 /codon\_start=1  
 /transl\_table=11  
 /fullproduct="qcoverage 100 , hcoverage 100 , similarity  
 100 , identity 100 , eval ue 2.96e-107 , alnlength 152 ,  
 Bacteria , Proteobacteria , WP\_010082596.1 MULTISPECIES:  
 50S ribosomal protein L13 [Wolbachia]"  
 /cog="RplM COG0102 148 Ribosomal protein L13"  
 /pfam="Ribosomal\_L13"  
 /tigr="TIGR01066 rplM\_bact 141 ribosomal protein L13"  
 /product="50S ribosomal protein L13"  
 /translation="MKTFFLKEKQINKKWFVIDAEGLVVGR LAA FVATLLRGKHKPEY  
 TPHMDCGDNVIIINA EK VHF TGKKLKD KIYKHTGYSGGLKKTTPDNILNGKFP ERVI  
 EMAVKRMLDDGPMARRR FENLYVYSGSEHKHQGQQPEKIDFASLNRKNKK"  
 /besthit="qcoverage 100 , hcoverage 100 , similarity 100  
 , identity 100 , eval ue 2.96e-107 , alnlength 152 ,  
 Bacteria , Proteobacteria , WP\_010082596.1 MULTISPECIES:  
 50S ribosomal protein L13 [Wolbachia]"  
 gene 3502..3957  
 /locus\_tag="wEsol\_00007"  
 CDS 3502..3957  
 /locus\_tag="wEsol\_00007"  
 /codon\_start=1  
 /transl\_table=11  
 /fullproduct="qcoverage 100 , hcoverage 100 , similarity  
 100 , identity 100 , eval ue 1.36e-98 , alnlength 151 ,  
 Bacteria , Proteobacteria , WP\_007548415.1 MULTISPECIES:  
 30S ribosomal protein S9 [Wolbachia]"  
 /cog="RpsI COG0103 130 Ribosomal protein S9"  
 /pfam="Ribosomal\_S9"  
 /tigr="TIGR03627 arch\_S9P 130 archaeal ribosomal protein  
 S9P"  
 /product="30S ribosomal protein S9"  
 /translation="MKSSTINNNDWSEKTIKSAVDSLGR LYATGRRKESVARVWIKPG  
 SGKFSVNKKGD LISYFKRESVCQTVKMPFVATSM LDKYDV FATVKGGGLSGQAGALAH  
 GISRALSSVSQDLHSILRNGEFLTRDSRVVERKKYGQHKARKKCKQFSKR"  
 /besthit="qcoverage 100 , hcoverage 100 , similarity 100  
 , identity 100 , eval ue 1.36e-98 , alnlength 151 ,

gene Bacteria , Proteobacteria , WP\_007548415.1 MULTISPECIES:  
30S ribosomal protein S9 [Wolbachia]"  
4104..4415  
/locus\_tag="wEsol\_00008"

CDS 4104..4415  
/locus\_tag="wEsol\_00008"  
/codon\_start=1  
/transl\_table=11  
/fullproduct="qcoverage 100 , hcoverage 100 , similarity  
100 , identity 100 , evalue 4.46e-63 , alnlength 103 ,  
Bacteria , Proteobacteria , WP\_006279876.1 MULTISPECIES:  
HU family DNA-binding protein [Wolbachia]"  
/cog="HimA COG0776 94 Bacterial nucleoid DNA-binding  
protein"  
/pfam="Bac\_DNA\_binding"  
/tigr="TIGR00988 hip 94 integration host factor, beta  
subunit"  
/product="HU family DNA-binding protein"  
/translation="MSKEDIKQLKEDCSSQNIDITKSDLKIHDAFIKIIKNELHGK  
GEIRLHGIGTFSTAISQEKQCRNPQSGEIMTVPKKTRVKFKASQTLLSILNEKEKAAV  
S"  
/besthit="qcoverage 100 , hcoverage 100 , similarity 100  
 , identity 100 , evalue 4.46e-63 , alnlength 103 ,  
Bacteria , Proteobacteria , WP\_006279876.1 MULTISPECIES:  
HU family DNA-binding protein [Wolbachia]"

gene complement(4408..5115)  
/locus\_tag="wEsol\_00009"

CDS complement(4408..5115)  
/locus\_tag="wEsol\_00009"  
/codon\_start=1  
/transl\_table=11  
/fullproduct="qcoverage 100 , hcoverage 100 , similarity  
100 , identity 100 , evalue 6.90e-165 , alnlength 235 ,  
Bacteria , Proteobacteria , WP\_141456804.1 MULTISPECIES:  
pyridoxine 5'-phosphate synthase [unclassified  
Wolbachia]"  
/cog="PdxJ COG0854 243 Pyridoxal phosphate biosynthesis  
protein"  
/pfam="PdxJ Pfam-B\_19671"  
/tigr="TIGR00559 pdxJ 239 pyridoxine 5'-phosphate  
synthase"  
/product="pyridoxine 5'-phosphate synthase"  
/translation="MKLGVNIDHVATLRNARGTSYPDPLKAAEIAIDAGADFITVHLR  
EDRRHIRDEDVFNLKK SISTELNLEIAATEEMLEIAKKVKPYSISIVPEKREELTTEG  
GLDIVNMH SKLSSII EEMHSSSIKVSLFIDPNIDQLTYLEKLGTKPDIIEIHTGDYCD  
NPSEKKLQLITNAAEYVNKLGIECHAGHGITYKHAKKMTRIPHISALNIGHYLISEAV  
FYGLHSVVKTMKMTMSN"  
/besthit="qcoverage 100 , hcoverage 100 , similarity 100  
 , identity 100 , evalue 6.90e-165 , alnlength 235 ,  
Bacteria , Proteobacteria , WP\_141456804.1 MULTISPECIES:  
pyridoxine 5'-phosphate synthase [unclassified  
Wolbachia]"

# ORIGIN

```

1  tttaaaatat  tggcggttttt  tatgtttttaa  acgcttgaca  agcgaaattc  agctgctttt
61  aattgcaact  aacctacgct  gcaaatgttt  aagaaattta  ctaagcagaa  aaaaagacaa
121 agaatccccg  agttagctag  tcttttacta  tctctgtcga  gtattggcat  tttttgatgt
181 cttgtaacgc  ttataagcg  cgttcagctt  atttagataa  aaatctagat  gtagatgaag
241 ttttgtaaag  acatacagta  tctatatact  gcaaaaaatt  gaatataaga  cgccgataca
301 ttaagtaatc  cttacctttt  aatctgcaga  ttggcgaaaag  caaatacaac  agcttcactg
361 ttatgataag  ggggctggcg  gagtttgtca  aggaagtttt  ttcgtttctg  tgggctacct

```

|      |             |              |             |             |             |             |
|------|-------------|--------------|-------------|-------------|-------------|-------------|
| 421  | ggattaatat  | tatatagaaa   | gtctgtctgcc | aataaagcct  | aaacttacca  | aatacatttc  |
| 481  | tgtagattca  | gatctacttg   | acttttggttt | aaagtatttt  | actgttttta  | acattttttt  |
| 541  | tagctcgtaa  | caaaaatcct   | tatcagattc  | tccttgga    | atttttacta  | caaacgtgcc  |
| 601  | accatggctc  | aagaaatgct   | ttgcaaaatt  | gagcgctgcc  | tcacataaaa  | gcataattct  |
| 661  | gatatgatcc  | aacgatttta   | aaccacaaga  | ttcggggcgcc | atgtcagata  | aaattacatc  |
| 721  | aaatTTTTga  | tccttgaatt   | tttctcttaa  | aatttcaa    | tcattgataa  | tatcacattg  |
| 781  | tataaaactct | actccattaa   | ttgcgttcat  | tggttttatg  | tcaagagcaa  | ccacatttgc  |
| 841  | acctttctga  | gatgcaactt   | gtgaccatcc  | accaggagaa  | gcaccaagat  | caataatttt  |
| 901  | ttgcccttct  | tgggaataatt  | taaatttggt  | atccatttct  | accagcttat  | atgtcgagcg  |
| 961  | tgacctataa  | ccatccttgc   | tagttttttg  | cacatactga  | tcattcaaat  | gacgatgtag  |
| 1021 | ccaccttggt  | gaagatagtt   | ttctgcctct  | agccgtcttt  | actctagtgt  | ttattgctaa  |
| 1081 | taccctactt  | attattgatt   | atatctttta  | gctctttttc  | aactacttct  | tttaccagt   |
| 1141 | catgtagata  | tttattcagc   | cattctgaga  | gctgagggtt  | taaaagagat  | gtaactaatt  |
| 1201 | cttcaacagt  | aagggttcgct  | tttttttggt  | gtttatgctg  | taattcgttt  | tgcatttttc  |
| 1261 | caagcaacgc  | tttgatctct   | tccatattct  | cttttaaaat  | tagatgatcg  | ttattttg    |
| 1321 | cttgtaagcc  | gctattactc   | gctttgttat  | tactcatttg  | gatattatcg  | tacaaataaa  |
| 1381 | tatctttttt  | ttcttctgaa   | ttgtagctat  | ggccattaaa  | ttggttattg  | ttgcaagcca  |
| 1441 | tttcctcact  | ttggtcacat   | ttatcaatgt  | cctctttttc  | attattttct  | tttttgccat  |
| 1501 | cttcttctat  | ttcttctgga   | tactcttcct  | caaggatatag | cacatcatca  | ttttcatcct  |
| 1561 | ttattttctgc | tttatcggtt   | ctcgcgtttt  | taccogatat  | agcttttttt  | atatcttcta  |
| 1621 | ggatatcttt  | tacagattga   | ttgccttggt  | catcatgcat  | agtgctaata  | ccattaaatt  |
| 1681 | tagaggtcta  | tactatttat   | cataaaaagc  | aagttgtaaa  | cactaatcac  | ataattgctt  |
| 1741 | tttgcttcaa  | ctaagtctga   | acgtgcttta  | aataatgcat  | cttcagtgtc  | caaaagggtca |
| 1801 | gatgtactct  | ttaaatttaa   | gtttacttct  | tgctcaactc  | cttccaatgc  | tagagctgct  |
| 1861 | gctttttccg  | cttcttgact   | tgctttgata  | atggcctttg  | ctgtcaacac  | attattccaa  |
| 1921 | gcattttacaa | ctgcttggtc   | tatatttttt  | accgtttcat  | aataatcgta  | ggtagatttt  |
| 1981 | tttgcatcca  | ttttagcttt   | actgacacca  | aaagcattaa  | ctcctctctt  | aaagattgga  |
| 2041 | acatcaagag  | taaaaactac   | atgaacattt  | tctaatagtt  | tgtctacctt  | cataccatcc  |
| 2101 | tccccaaaat  | ttttgcttgc   | acttagattt  | aaagaaggaa  | gccacttgga  | gctttcagca  |
| 2161 | atcacttcca  | ttccggctgc   | tcttttttga  | taaactgctg  | cttttagaga  | taaattattg  |
| 2221 | gtttttgcta  | actgtaaaca   | ttcattttagc | tctggaacag  | aaggtagttt  | atcattagct  |
| 2281 | tcagaaagg   | catcagcatc   | ttcgccaatc  | aaatgataat  | aagcaatatt  | taccaacttt  |
| 2341 | aattttacctt | cagcatcaac   | tctttcggat  | atagaagacg  | aaaatttttg  | ttttgctaac  |
| 2401 | aaaacttcag  | cattgggttac  | ctctccaagg  | gaaaagcggt  | ttttcatagc  | tgacaaatgt  |
| 2461 | tccaaagaaa  | cgcgttcttt   | atgttctctg  | agcttttaata | tttctgtctt  | ttgtaaaaca  |
| 2521 | ttaacatatg  | ctttcacagc   | attaagtgca  | agctcttggt  | ttaattgctg  | aaatcgcatc  |
| 2581 | ttttctgctt  | tgagaagatg   | gcttgatcga  | ctgaatgtgg  | caaagggtacc | accgccatcg  |
| 2641 | attaattttct | ggcgcaatgt   | aagttttttt  | tcagatgtat  | caagattaaa  | gttactatcg  |
| 2701 | aaattgtatt  | gcaaattaat   | gtcaggtaaa  | aatccagcta  | accagaaga   | tttatagtgt  |
| 2761 | ttttctgcgc  | ttttatatattg | gtaaaattga  | gacttttattt | ttgagctatt  | tttgatggct  |
| 2821 | ttgcttatca  | cttctcccac   | atcggttgca  | tagcaactta  | tagtattaaa  | aatgatcgca  |
| 2881 | agtgtgataa  | tcaatcgaaa   | cattctaatt  | cctatgcata  | ttggttgccg  | agctcaatta  |
| 2941 | ctaacataaa  | ttacttttaat  | aatcaataac  | taatattggt  | gacactattg  | agaaattaa   |
| 3001 | tatatcatag  | cttactattg   | ttggatcaaa  | taatgaagac  | ttttttctta  | aaggagaaac  |
| 3061 | aatcaataaa  | aaagtgggtt   | gtcatagatg  | cagaaggatt  | agtggtaggg  | aggcttgcat  |
| 3121 | catttgtagc  | gacactatta   | cgtggaaagc  | ataaacctga  | gtatacacct  | catatggatt  |
| 3181 | gtggcgataa  | tgtaattatt   | atcaacgcag  | aaaagggtgca | tttcacccga  | aagaagctta  |
| 3241 | aagataaaa   | ttactataag   | catacagggt  | attctggtgg  | tttgaagaaa  | actactccag  |
| 3301 | ataatatttt  | aaatggcaaa   | tttcttgagc  | gtgtaataga  | aatggcagtg  | aaaaggatgc  |
| 3361 | ttgatgatgg  | gcctatggca   | cgtagacgct  | ttgaaaattt  | gtatgtttat  | tctggttcag  |
| 3421 | agcataagca  | tcaaggacag   | caacctgaaa  | agatagattt  | tgctcttttg  | aatcgtaaaa  |
| 3481 | ataaaaagta  | atggagtaaa   | aatgaagagt  | tctacaataa  | ataacaatga  | ttggtcagaa  |
| 3541 | aagacaatta  | aatcagcagt   | tgattcgctt  | ggtcgtttat  | atgctacagg  | ccgaagaaaa  |
| 3601 | gaatctgtag  | caagagtatg   | gataaagccg  | gggagtggaa  | aatttagtgt  | taacaaaaaa  |
| 3661 | ggcgatctaa  | tttcttattt   | taaaagagag  | tcagtgtgcc  | aaacagtaaa  | aatgccattt  |
| 3721 | gttgcaacct  | ctatgttaga   | taaatatgat  | gtatttgcaa  | ctgtaaaaag  | tggagggcta  |
| 3781 | tctgggtcaag | cagggtgctct  | agctcatgga  | ataagcagag  | ctttaagtag  | cgtaagccaa  |
| 3841 | gatttgcatt  | ctatattacg   | taatggtgag  | ttcttaacta  | gagattcacg  | tgttgttgaa  |
| 3901 | cgtaagaaat  | atggtcaaca   | taaagctcgg  | aaaaagtgct  | aattttctaa  | gagatagtta  |
| 3961 | ttttatagt   | gtgttttttt   | gtaagtatta  | tacaaatatt  | tgcaaaaatg  | tatgatatcc  |



```

/ environmental_sample
/ country="USA: Cowling Arboretum, Carleton College,
Northfield, MN"
/ lat_lon="44.48 N 93.13 W"
/ altitude="280 m"
/ collection_date="2018-11"
/ metagenome_source="insect metagenome"
/ note="metagenomic"
gene complement(<1..171)
/ locus_tag="wEsol_00010"
CDS complement(<1..171)
/ locus_tag="wEsol_00010"
/ codon_start=1
/ transl_table=11
/ product="putative transposase"
/ pfam="Transposase_20"
/ translation="MKEIRQDIEDAIAELKGKNELLISYKGIGSKTASVLLTEVPELG
RLENREIACLVGV"
/ besthit="qcoverage 100 , hcoverage 55.3398058252427 ,
similarity 100 , identity 100 , evalue 4.67e-30 ,
alnlength 57 , Bacteria , Proteobacteria , WP_213862765.1
transposase [Wolbachia endosymbiont of Rhagoletis
cerasi]"
gene complement(495..662)
/ locus_tag="wEsol_00011"
CDS complement(495..662)
/ locus_tag="wEsol_00011"
/ codon_start=1
/ transl_table=11
/ fullproduct="qcoverage 100 , hcoverage 100 , similarity
100 , identity 100 , evalue 2.77e-31 , alnlength 55 ,
Bacteria , Proteobacteria , WP_155968863.1 MULTISPECIES:
hypothetical protein [Wolbachia]"
/ translation="MARIIFMGVDVSKEALDISINGKHKRIANVSDAISKFIETNIVD
LPIKLCVSWWL"
/ product="hypothetical protein"
/ besthit="qcoverage 100 , hcoverage 100 , similarity 100
, identity 100 , evalue 2.77e-31 , alnlength 55 ,
Bacteria , Proteobacteria , WP_155968863.1 MULTISPECIES:
hypothetical protein [Wolbachia]"
gene complement(1378..1719)
/ locus_tag="wEsol_00012"
CDS complement(1378..1719)
/ locus_tag="wEsol_00012"
/ codon_start=1
/ transl_table=11
/ fullproduct="qcoverage 100 , hcoverage 100 , similarity
100 , identity 100 , evalue 1.53e-79 , alnlength 113 ,
Bacteria , Proteobacteria , AAS13810.1 transposase, IS5
family, OrfB [Wolbachia endosymbiont of Drosophila
melanogaster]"
/ cog="COG3293 COG3293 124 Transposase and inactivated
derivatives"
/ pfam="DDE_Tnp_1_2 DDE_Tnp_1"
/ product="transposase, IS5 family, OrfB"
/ translation="MRTKYTKVKKMWADMGYQGRNLKNHIKEEYDIDIEIVKRPPCRF
WVHKDTPPELLPTREQGFKVQPRRWVVERTFAWVNRNRRLSKEYDLLTTSTENFIYLA
MSRVMLKREYA"
/ besthit="qcoverage 100 , hcoverage 100 , similarity 100
, identity 100 , evalue 1.53e-79 , alnlength 113 ,

```

Bacteria , Proteobacteria , AAS13810.1 transposase, IS5 family, OrfB [Wolbachia endosymbiont of Drosophila melanogaster]"  
 gene complement(1830..2210)  
 /locus\_tag="wEsol\_00013"  
 CDS complement(1830..2210)  
 /locus\_tag="wEsol\_00013"  
 /codon\_start=1  
 /transl\_table=11  
 /fullproduct="qcoverage 100 , hcoverage 100 , similarity 100 , identity 100 , evalue 1.16e-87 , alnlength 126 , Bacteria , Proteobacteria , AOV87106.1 transposase [Wolbachia endosymbiont of Drosophila incompta]"  
 /cog="COG3293 COG3293 124 Transposase and inactivated derivatives"  
 /pfam="DUF4096"  
 /product="transposase"  
 /translation="MRKKYPTDLSEREWARIEKHFRVSYKKGGRRPPKYSKREILEAIFYVLRGTGCQWRYLPNDFPLWKTVYEQFRQWKKQGIFEKMNIEITKYSRRKIGRNEQPSACIVDSQSVKTTEKGGSKAMMEVKK"  
 /besthit="qcoverage 100 , hcoverage 100 , similarity 100 , identity 100 , evalue 1.16e-87 , alnlength 126 , Bacteria , Proteobacteria , AOV87106.1 transposase [Wolbachia endosymbiont of Drosophila incompta]"  
 gene 2282..2692  
 /locus\_tag="wEsol\_00014"  
 CDS 2282..2692  
 /locus\_tag="wEsol\_00014"  
 /codon\_start=1  
 /transl\_table=11  
 /product="hypothetical protein"  
 /translation="MEKYTNAWFNKKDNHDCANDGTCGQSIKDFRIGNSDISFFDSNKNLIAKVPKLPKYSSDKYGHQLYKEAESKQFNFYFSTNIHDVLSNSFTVKYGYINCTIKYDNLSEQEQNQIETDIKTAYEAFKEKFCFKDSSIS"  
 /besthit="qcoverage 99.2647058823529 , hcoverage 63.0841121495327 , similarity 98.5 , identity 97.8 , evalue 4.57e-91 , alnlength 135 , Bacteria , Proteobacteria , AAX14461.1 hypothetical protein WwMoj0018, partial [Wolbachia endosymbiont of Drosophila mojavensis]"  
 gene 2837..3049  
 /locus\_tag="wEsol\_00015"  
 CDS 2837..3049  
 /locus\_tag="wEsol\_00015"  
 /codon\_start=1  
 /transl\_table=11  
 /product="hypothetical protein"  
 /translation="MDFVLGHELGHIFQLCFSPSATVQTLSDTELIANVVGREVEEKNYKAICKQMGVDEYKYDGWSFILNT"  
 /besthit="qcoverage 95.7142857142857 , hcoverage 13.7577002053388 , similarity 100 , identity 100 , evalue 3.07e-38 , alnlength 67 , Bacteria , Proteobacteria , WP\_197907219.1 hypothetical protein [Wolbachia endosymbiont of Kratibia gibbosae]"  
 gene 3159..4370  
 /locus\_tag="wEsol\_00016"  
 CDS 3159..4370  
 /locus\_tag="wEsol\_00016"  
 /codon\_start=1  
 /transl\_table=11

```

/product="hypothetical protein"
/translation="MFKFKYKDTTGSIIYKDLSEDEKFKQIIQVRKNSGLDEYEDHGWI
FSFKYKGTYNVRYKDFSEDEKFKAIQNVKNIHELVDYKDHGWIFSFKYKGTYNVR
CKYFSEDEKFKQFIKDIKNSHESLVSECDGLGNENTVLSIHVDENKEISRMFRNSDKN
IFKQLDKTLISRSKSEEEVNENRTNPEPEEEQKGGDYTEVTGMLQFKYKGTNYAIQHR
GYLLVEEEKLRLIQDIKNSHESLVSEYRLNEGSLSQNATVVIFVDENKDIEKMYFHN
PDKNMSKWLDKTLISRSKPEQDVDDTAGKEPEPEPEAEEDTQQPSNFLSNIFSAIKSII
DSISLFSWLFGSKEKESNQSDDNPSLFLKLDANELDHEVKPDANELGHDVRDHLSDN
YNHYNSSDGLM"
/besthit="qcoverage 99.7518610421836 , hcoverage
61.6564417177914 , similarity 95.8 , identity 95.0 ,
evalue 1.53e-173 , alnlength 402 , Bacteria ,
Proteobacteria , WP_141456949.1 hypothetical protein
[Wolbachia endosymbiont of Carposina sasakii]"
gene 4638..4967
/locus_tag="wEsol_00017"
CDS 4638..4967
/locus_tag="wEsol_00017"
/codon_start=1
/transl_table=11
/pfam="DDE_Tnp_1_5"
/fullproduct="qcoverage 100 , hcoverage 100 , similarity
100 , identity 100 , evaluate 4.31e-75 , alnlength 109 ,
Bacteria , Proteobacteria , WP_141456678.1 MULTISPECIES:
transposase [unclassified Wolbachia]"
/translation="MPQKMRVSNCHYEYKFLQERGSIFCYINDAIENWYENCCKMQGG
NYIYSDKVILVHIIVSFFRIGLRQTVGFIKGYLQQIGRDLAVISYSQASRRFKKLN
KINDCRK"
/product="transposase"
/besthit="qcoverage 100 , hcoverage 100 , similarity 100
, identity 100 , evaluate 4.31e-75 , alnlength 109 ,
Bacteria , Proteobacteria , WP_141456678.1 MULTISPECIES:
transposase [unclassified Wolbachia]"
gene 4951..5151
/locus_tag="wEsol_00018"
CDS 4951..5151
/locus_tag="wEsol_00018"
/codon_start=1
/transl_table=11
/product="hypothetical protein"
/translation="MIAENNMEDIEIAIDSTGISIYNNTPGHSKENSTDRKYRGYEQT
RKLHVMLNINNKKAIKAVKYSNG"
/besthit="qcoverage 100 , hcoverage 31.2796208530806 ,
similarity 100 , identity 100 , evaluate 1.52e-35 ,
alnlength 66 , Bacteria , Proteobacteria , WP_081600764.1
MULTISPECIES: transposase [unclassified Wolbachia]"
gene 5171..5578
/locus_tag="wEsol_00019"
CDS 5171..5578
/locus_tag="wEsol_00019"
/codon_start=1
/transl_table=11
/pfam="DDE_Tnp_1_2"
/fullproduct="qcoverage 100 , hcoverage 100 , similarity
100 , identity 100 , evaluate 9.23e-96 , alnlength 135 ,
Bacteria , Proteobacteria , WP_174516160.1 MULTISPECIES:
transposase [unclassified Wolbachia]"
/translation="MLKEVDFQHAIKALYADRACDRHKFYKLCNEYDIKTKIPPINNA
AEHPEIDYMSDRNAAIRLIKLYGEDGMKEWKKEVNYGKRSYIEGFFSRLKQIFGFSFR
NKSEINREKELLIKCYLLNKFTDIGMAKFEIVT"

```

```

        /product="transposase"
        /besthit="qcoverage 100 , hcoverage 100 , similarity 100
        , identity 100 , evalue 9.23e-96 , alnlength 135 ,
        Bacteria , Proteobacteria , WP_174516160.1 MULTISPECIES:
        transposase [unclassified Wolbachia]"
gene      5883..6386
        /locus_tag="wEsol_00020"
CDS       5883..6386
        /locus_tag="wEsol_00020"
        /codon_start=1
        /transl_table=11
        /pfam="DsbC"
        /fullproduct="qcoverage 100 , hcoverage 100 , similarity
        100 , identity 100 , evalue 3.64e-122 , alnlength 167 ,
        Bacteria , Proteobacteria , WP_155968372.1 MULTISPECIES:
        hypothetical protein [Wolbachia]"
        /translation="MKIHIYLILFLFFSCTQLYADEEIIAKFDLLIGEINEASFTLKGA
        IKVTVEPGWHIYYKDPGDFGLPTSISYKGNASDINIHWPIPKCHKDKVGRETFFVSNVY
        EGMVLFPFKMNIFLNQGYIDLNFHINYAICKDRICIPKNVEIKIRQPLKDFIDSDINKL
        INEWYEK"
        /product="hypothetical protein"
        /besthit="qcoverage 100 , hcoverage 100 , similarity 100
        , identity 100 , evalue 3.64e-122 , alnlength 167 ,
        Bacteria , Proteobacteria , WP_155968372.1 MULTISPECIES:
        hypothetical protein [Wolbachia]"
gene      6824..7024
        /locus_tag="wEsol_00021"
CDS       6824..7024
        /locus_tag="wEsol_00021"
        /codon_start=1
        /transl_table=11
        /product="hypothetical protein"
        /translation="MVSHKKFRSQCHALTVRTLRYKSNLYQEKRCCHPSAQTGLGWLCCI
        ASYDGLKIKKIGNISSLLFWYL"

```

# ORIGIN

```

1  aactccaact aagcatgcaa tttctctatt ctctaata ccaagctcag gcacctctgt
61  cagtagaacg ctgcgcgtct ttgatccaat acctttatag ctgattaaaa gctcattttt
121 tcctttcaat tcagctattg cgtcttctat gtcttgccca atttctttca attgtttttc
181 agcaaaccct atctgtcttt ctatgtattc tctagctttt cccgtcgcac tttgcaggcg
241 acacttgttt gcatgaattg catcatttaa attacgctca actgccccca gctcctttta
301 ttcctcttgt ttttgtgaaa ttatacatcc ttttacttca ccgtctttac tgacaaattc
361 agcgtatttt tccagtaatt tagcatctaa cttgtcagtt tttgcaaaat gattgcaagc
421 tttggcaaat gcatataccc gattcgggtg agctttatgg acagttatct tgcaacaatt
481 ttataatgag cttttcatag ccaccagctt acacataact tgatgggtaa atcgactata
541 tttgtttcta taaacttaga tatagcatca ctcacgtttg ctatgcgctt atgcttgcca
601 ttaattgaga tgtccaatgc ttccttgga acatctactc ccatgaaaat tattctagcc
661 atttttgtac ctataaatat aatcaaaca taatgcaaaa tgctgtatac aggattgtaa
721 ttcgatcttt tagatccacc taccgttcgt actacatttt gctttaagcc ttactattac
781 ccacaaataa aaacatagta ttgtatttac tcaaaataatt taattttatt aacctgaaag
841 cttattagat taaaattatt aaactaagag ttataatttt agcaactaaa agctgtaaat
901 tgcaccatat aaacagttat ttcaagcaaa agttatgcca ttaagagcta tgcaacaaac
961 atttatatat gtgggtaata gtaagatcta aatccgatag agcattgttg gcacaccatc
1021 aaaagttgcc tcagacctct aatgcatcaa tgtacagact tacacctttt agttggtaat
1081 accatttttag acgtttatca ttcgttttag aaaatactat agtagcggaa tgacgaattt
1141 ttgtttttca aattgtcagt aaatctaagt cagtttagct atataaaaaca tagtataaaa
1201 agagctattt tagcaaaaatt ttaaacaaat aaagttaatt acttcacaat tgataacctta
1261 cgagaaaagc acatttgata cagattttaa atacaagtta acgaattatt atgattttta
1321 ccaagataat aatataagtaa ggtttggtag tgagaggttg tccggaaact agtaaaattca
1381 agcatattcc ctctttaaca taaccctact catagctagg tatatgaaat tctcagtgga
1441 tgttgtgagt aaatcactact ctttcgatag ctttctattc ctattaaccc aagcaaaagt

```

|      |             |             |             |             |             |             |
|------|-------------|-------------|-------------|-------------|-------------|-------------|
| 1501 | ccttttctaca | acccatcttc  | ttggctgtac  | tttaaaccct  | tgttctcttg  | ttggtagtag  |
| 1561 | ctcaggtggc  | gtatctttgt  | gcacccaaaa  | tctacatgga  | ggccttttaa  | caatttcaat  |
| 1621 | atctatgtca  | tattcttcct  | ttatgtgatt  | ctttaaattt  | cttccttggg  | atcccatgtc  |
| 1681 | agcccacatt  | tttttaactt  | tagtatattt  | tgttctcata  | ttgtttaatg  | ctattttaat  |
| 1741 | accatctcta  | tcattttcgt  | tagcagcgcc  | tacgtaacaa  | cctagtataa  | aaccctgagt  |
| 1801 | gtctgtaatt  | atatgccttt  | ttctaccctt  | tactttttta  | cttccatcat  | agcctttgat  |
| 1861 | ccccctttt   | ctgtagtctt  | tacagattga  | ctatctacta  | tacaggcact  | cggctgtctca |
| 1921 | ttccttccta  | ttttctttct  | actatatttt  | gtaatttcat  | aattcatttt  | ctcaaaaatt  |
| 1981 | ccctgcttct  | tccattgcct  | gaactgctca  | tacacagtct  | tccatagcgg  | aaaatcattt  |
| 2041 | ggtaaatacc  | gccattgaca  | ccctgtacgc  | aatacataga  | aaattgcttc  | taatatattt  |
| 2101 | cttttgctat  | actttggcgg  | ccttcctcct  | ttcttgtagt  | atactctgaa  | gtgtttttct  |
| 2161 | attcttgccc  | attccctttc  | gcttagatct  | gttggatact  | ttttctctcat | ctttaccccg  |
| 2221 | tactaaaatt  | tcagatatta  | tagcctttta  | cttatttccg  | gacaacctct  | gaggatcaaa  |
| 2281 | aatggaaaaa  | tacaccaacg  | catggtttta  | taagaaagat  | aatcatgatt  | gtgcaaatga  |
| 2341 | tggcacttgc  | gggcaatcta  | taaaggattt  | taggattggg  | aattctgata  | tttctttttt  |
| 2401 | tgatagtaac  | aaaaacttaa  | ttgccaaagt  | acctaaacta  | caaaggtatt  | ctagtgataa  |
| 2461 | atatgggcat  | caattgtata  | aagaagccga  | gtcaaagcag  | ttcaattatt  | tttccacaaa  |
| 2521 | tatacatgat  | gttttgtcta  | acagctttac  | cgttaaatac  | gggtatataa  | attgtactat  |
| 2581 | aaaatacgac  | aacttatctg  | agcaggaaca  | aaaccaaaata | gaaacagaca  | ttaaaactgc  |
| 2641 | ctatgaggca  | tttaaagaaa  | agttttgctt  | caaagatagt  | agcataagtt  | aaaatataac  |
| 2701 | ggtttacatt  | ttcaataata  | gaagcgatta  | tacaaagtat  | aacaatcttc  | tcggcataga  |
| 2761 | tgaagatggg  | gggccaggat  | atattacacg  | aggagtaaca  | gattgtcaga  | atactctgac  |
| 2821 | atataagcaa  | agtgccatgg  | attttgttct  | gggtcatgag  | ctaggccaca  | tatttcaatt  |
| 2881 | gtgtttttca  | ccatcgga    | cagtccaaac  | tttgagtatt  | ctggatactg  | aactcatagc  |
| 2941 | aaatgttggt  | ggacgagaag  | tagaagaaaa  | aaattataaa  | gctatttgca  | agcagatggg  |
| 3001 | tgtagatgaa  | tataaatatc  | atggatggag  | ttttatttta  | aatacatagg  | tacaactgta  |
| 3061 | gtgtataacc  | cctaaacctt  | tcagaagaag  | agaaatttca  | aattatacaa  | cgtgtcaaga  |
| 3121 | gttctggact  | agtagatgaa  | tatgaagacc  | atggatggat  | gtttaaattt  | aaatataaag  |
| 3181 | atacaactgg  | tagtatatac  | ctcaaggacc  | tttcagaaga  | tgaaaaattt  | caaattatac  |
| 3241 | aacgtgtcaa  | gaattctgga  | ctagatgaat  | atgaagacca  | tggatggata  | tttagtttta  |
| 3301 | aatacaaagg  | caccacttat  | aacgtaagat  | acaaggactt  | ttcagaagat  | gaaaaattta  |
| 3361 | aagctataca  | aaatgtcaag  | aatattcatg  | aactagtaga  | tgaatataaa  | gaccatggat  |
| 3421 | ggatattttag | ttttaaatac  | aaaggcacca  | cttataacgt  | aagatgcaag  | tacttttcag  |
| 3481 | aagatgaaaa  | atttcaattt  | atcaaagaca  | ttaagaactc  | tcatgaatcg  | ctcgtttagtg |
| 3541 | aatgtgatgg  | attgggggaat | gagaatacag  | ttttatcgat  | tcacgttgat  | gaaaataagg  |
| 3601 | agataagtcg  | aatgtatttt  | cgaaactccg  | acaaaaatat  | attcaaacag  | ctagataaga  |
| 3661 | cacttataag  | cagaagtaag  | tctgaagaag  | aggtaaataga | aaaccgcacg  | aatccagagc  |
| 3721 | cagaagaaga  | acaaaaaggt  | gatgactaca  | cagagggttac | aggaatgttg  | caatttaagt  |
| 3781 | acaaagggac  | caattatgct  | atacaacaca  | gagggttacct | tttagtagaa  | gaagaaaaac  |
| 3841 | ttcgattgat  | tcaagatata  | aagaactctc  | atgaatcgct  | cgttagtga   | cgttatagat  |
| 3901 | taaatgaagg  | gtcattaagt  | cagaatgcaa  | ctgtagtaat  | ttttgttgat  | gaaaacaagg  |
| 3961 | acatagagaa  | aatgtatttt  | cataatccag  | acaagaatat  | gtccaaatgg  | ttagataaga  |
| 4021 | cactcataag  | cagaagtaag  | cctgaacaag  | atgtggatga  | cacagcagga  | aaagagcctg  |
| 4081 | aaccagaatc  | agccgaagag  | gatactcagc  | aaccacagtaa | tttcttatcc  | aatatttttt  |
| 4141 | cagcaattaa  | atccattatt  | gattctatct  | catcactctt  | ttcatggtta  | tttgggtcga  |
| 4201 | aagagaaaaga | gtctaataca  | caatctgatg  | ataatccttc  | tttgtttaag  | ctcgatgcta  |
| 4261 | atgagttaga  | tcacgaagtt  | aagcctgatg  | ccaatgagtt  | aggtcacgat  | gttagagatc  |
| 4321 | acttatcaga  | caattataac  | cattacaact  | catctgatgg  | gctaattgtaa | tatagcta    |
| 4381 | ttacagtatc  | tgttcagatg  | catggcta    | gtacaaaat   | tgaaacaaaa  | attccagtgc  |
| 4441 | ccctgtgatg  | tcattccagt  | gcttgacact  | ggatccgctt  | tccatatcat  | caaaacttgt  |
| 4501 | ttttacaaaa  | aacagctata  | gctgccaa    | taataaaaatt | ctggatccca  | gtgggctttg  |
| 4561 | ttgcatcgcc  | atgaaaagaa  | ctggcagtta  | ctgacaaaat  | tcattataaa  | tagccattta  |
| 4621 | actgttgaag  | aaaaaatatg  | ccacaaaaaa  | tgagagtcag  | taactgccat  | gaatataaca  |
| 4681 | aatttctcca  | agaaagagga  | agcatttttt  | gttatatcaa  | tgacgccata  | gaaaattggg  |
| 4741 | acgagaattg  | tccaaaaatg  | cagggcggca  | actataattt  | tagtgataaa  | gttgtgattt  |
| 4801 | tgggtgcatat | aatcgtcagt  | ttcttttagaa | ttgggtttaag | acaaacagtc  | gggtttataa  |
| 4861 | aagggtattt  | gcaacaaata  | ggaagagatt  | tggcagttat  | cagctattca  | caagcatcaa  |
| 4921 | gaaggtttaa  | gaaactta    | attaagataa  | atgattgcag  | aaaataatat  | ggaagata    |
| 4981 | gaaattgcta  | tagacagtac  | aggaattagt  | atatacaaca  | acactcctgg  | tcacagcaag  |
| 5041 | gaaaatagca  | ctgacagaaa  | ataticgtggc | tatgagcaaa  | cgagaaaatt  | gcacgtaatg  |

```

5101 ttgaatataa acaacaaaaa agccatagct gtaaaatata gtaacggctg atcactatgg
5161 agcttgtgat ttgctaaaag aagttgattt tcagcatgcc ataaaagcac tatatgcaga
5221 tagagcatgt gataggcaca agttttataa gttgtgtaac gaatatgata taaagacaaa
5281 aattccacca ataaacaatg cggcagaaca tccagaaata gattatatgt ctgacaggaa
5341 tgctgctatt aggttaataa aattatacgg tgaagatggc atgaaagaat ggaaaaaaga
5401 agtaaattat gggaaaagat cttatatattg agggtttttc tcaagattaa agcaaatatt
5461 cggatttagt tttaggaata aatctgagat aaatcgagaa aaagaactgc taatcaaatg
5521 ctatttgctt aataaattca ctgatattgg tatggctaaa tttgagatag ttacatgaat
5581 ttaccataaa tcaccatctc ataaagtgtg atgcaacaaa gccatcccag tgtcaagcac
5641 tgggatgaca cctccttat gggccaaaat cacaatgttc gtacagttgt ggattcattc
5701 gcggtatctc ggcatagatt ccgctaacaa gtagcggaat gacgaatttg tcgtttttca
5761 gattgtcgtg agtcagttta gctatagcat aatgctatat taataaataa tctatataat
5821 actattaaat ataataatta aaatctaaat tactttctct ataaaaggag aaatttacct
5881 taatgaaaat acatatatat ttaatatgtt ttttattttt ttcttgcact caactatatg
5941 ctgacgagga aattgcaaaa tttgatttac ttattggcga gataaatgaa gcaagcttca
6001 ctcttaaagg tgcaataaag gttacagtag aaccaggctg gcacatatat tataaagatc
6061 ctggagattt tggccttccc acgtctatta gttacaaagg taatgcatca gatataaata
6121 ttactgggcc tattccaaag gaacataaag ataaagtagg gagagagacg tttgtaagta
6181 acgtatatga ggggatggta ttatttcctt ttaagatgaa tatattttta aatcaagggt
6241 atattgacct taacttccat ataaattatg cgatatgtaa agataggtgc atccctaaaa
6301 atgttgagat aaaaatcagg caaccattaa aggattttat agattctgat atcaataaac
6361 ttataaatga gtggatgaa aaatagagtt ctcatggggt aggtgtcatt ccagcgcgtg
6421 aactggaat ggctttgttg catcgctact tatgaaaggc taactataat taggattata
6481 agcaacttat tgaaaatctt gtttttttgc aatcaatctg atcaaattta agaatagtaa
6541 tttgttattt atattaataa atttaattct attgaaaata gctaaagcat tgaaattctt
6601 gaatttttagc cggattagtg agtggtagtg aaatttcttt tactcaaatt taggtattca
6661 ctgaccgttc ttgttataaa taccagaata ataagctact gatattccct atctttttta
6721 tctttaatcc atcatagcta gcgatgcaac aaagcccact ggaatctcat ttactttttt
6781 gttcactatg tgaggaactt gggcctacaa gtatataaac ataatgggtt cgcataaaaa
6841 atttagatcc cagtgtcacg cactaactgt acgaacattg agatataaga gtaatttgta
6901 ccaagaaaaa agatgtcatc ccagtgccca gacactggga tggctttgtt gcatcgctag
6961 ctatgatgga ttaaagataa aaaagatagg gaatatcagt agcttattat tctggtattt
7021 ataacaagaa cggtcagtga atacctaaat ttgagtaaaa gaaatttcac taccactcac
7081 taatccggct aaaattcaag aatttcaatg ctttagctat tttcaataga attaaattta
7141 ttaatataaa taacaaatta ctattcttaa atttgatcag attgattgca aaaaaacaag
7201 attttcaata gggttgcttat aatcctaact atagtttagcc tttcataagt agcgatgcaa
7261 caaagccac tgggatccag attggacact aagttggtga gtataaaaag agctaactt
7321 atgttaaaac acaatatattt tggtgagggg ttgcattaaa agctggattc cagtgtcaag
7381 cactggaa

```

//

```

LOCUS      JAQZAU010000003      54148 bp      dna      linear      ENV 17-MAR-2023
DEFINITION MAG: Wolbachia pipientis isolate wEsol contig_10723, whole genome
            shotgun sequence.
ACCESSION  JAQZAU010000003 JAQZAU010000000
VERSION    JAQZAU010000003.1
DBLINK     BioProject: PRJNA929258
            BioSample: SAMN33142973
KEYWORDS   WGS; ENV; Metagenome Assembled Genome; MAG.
SOURCE     Wolbachia pipientis (insect metagenome)
ORGANISM   Wolbachia pipientis
            Bacteria; Pseudomonadota; Alphaproteobacteria; Rickettsiales;
            Anaplasmataceae; Wolbachieae; Wolbachia.
REFERENCE  1 (bases 1 to 54148)
AUTHORS    Fiutek,N., Couger,B.M., Roy,S., de la Torre,J.R. and Connor,E.F.
TITLE      Genomic assessment of the contribution of the Wolbachia
            endosymbiont of Eurosta solidaginis to gall-induction
JOURNAL    International Journal Molecular Sciences
REFERENCE  2 (bases 1 to 54148)
AUTHORS    Fiutek,N., Couger,B.M., Roy,S., de la Torre,J.R. and Connor,E.F.
TITLE      Direct Submission

```

JOURNAL Submitted (10-FEB-2023) Biology, San Francisco State University,  
1600 Holloway Ave, San Francisco, CA 94132, USA

COMMENT ##Genome-Assembly-Data-START##  
Assembly Date :: JUN-2019  
Assembly Method :: FLYE v. 06-2019  
Genome Representation :: Full  
Expected Final Version :: Yes  
Genome Coverage :: 100.0x  
Sequencing Technology :: Illumina HiSeq; PacBio Sequel  
##Genome-Assembly-Data-END##

FEATURES Location/Qualifiers  
source 1..54148  
/organism="Wolbachia pipientis"  
/mol\_type="genomic DNA"  
/submitter\_seqid="contig\_10723"  
/isolate="wEsol"  
/isolation\_source="galls on Solidago altissima"  
/host="Eurosta solidaginis MN-2018-EFC"  
/db\_xref="taxon:955"  
/environmental\_sample  
/country="USA: Cowling Arboretum, Carleton College,  
Northfield, MN"  
/lat\_lon="44.48 N 93.13 W"  
/altitude="280 m"  
/collection\_date="2018-11"  
/metagenome\_source="insect metagenome"  
/note="metagenomic"

gene <1..214  
/locus\_tag="wEsol\_00022"

CDS <1..214  
/locus\_tag="wEsol\_00022"  
/codon\_start=1  
/transl\_table=11  
/product="hypothetical protein"  
/translation="X LWLLTLIFCGIFFLSRLNGYFIMNFVSSHQIFSVAMQQSHPS  
VKHWNDITGALEFLFQYLYISHASEQIL"

gene complement(225..2177)  
/locus\_tag="wEsol\_00023"

CDS complement(225..2177)  
/locus\_tag="wEsol\_00023"  
/codon\_start=1  
/transl\_table=11  
/fullproduct="qcoverage 100 , hcoverage 100 , similarity  
99.7 , identity 99.7 , evalule 0.0 , alnlength 650 ,  
Bacteria , Proteobacteria , WP\_209452344.1 hypothetical  
protein [Wolbachia endosymbiont of Ceratosolen solmsi]"  
/translation="MEKYTNAWFNKKDNHDCANDGTCGQSIKDFRIGNSDISFFDSNK  
NLIKVPKLPKYSSDKYGHQLYKEAESKQFNYSFSTNIHDVLSNSFTVKYGYINCTIKY  
DNLSEQEQNQIETDIKTAYEAFKEKFCFKDSSISKKNITVYIFNNSRDYTKYNNLLGID  
EDGSPGYITRGVTDQCNTLTLYKQSAMDVFLGHELGHIFQLCFSPSATVQTLISILDTEL  
IANVVGREVEEKNYKAICKQMGVDEYKYDGSWFIFKYIGTTGSVYRLNLSEEEKFQII  
QRVKSSGLDEYEDHGWMFKFYKDDTGTSGIYKDLSEDEKFQIIQRVKNSGLDEYEDHG  
WIFSFKYKGTTYNVRCKYFSEEEKFQFIKDIKNSHESLVSECDGLGNENTVLSIHVDE  
NKEISRMYFRNSDKNIFKQLDKTLISRSKSEEEVNENRTNPEPEEEQKGGDYTEVTGM  
LQFKYKGTNYAIQHRGYLLVEEEKLRLLIQDIKNSHESLVSERYRLNEGSLSQNATVVI  
FVDENKDIEKMYFHNPDKNMSKWLDKTLISRSKPEQDVDDTAGKEPEPESAEEDTQQP  
SNFLSNIFSIAKSIIDSISLFSWLFSGSEKESNQSQSDDNPSLFKLDANELDHEVKPD  
ANELGHDVRDHLSDNYNHYNSSDGLM"  
/product="hypothetical protein"  
/besthit="qcoverage 100 , hcoverage 100 , similarity 99.7"

```

, identity 99.7 , evalue 0.0 , alnlength 650 , Bacteria ,
Proteobacteria , WP_209452344.1 hypothetical protein
[Wolbachia endosymbiont of Ceratosolen solmsi]"
gene 2878..3045
/locus_tag="wEsol_00024"
CDS 2878..3045
/locus_tag="wEsol_00024"
/codon_start=1
/transl_table=11
/fullproduct="qcoverage 100 , hcoverage 100 , similarity
100 , identity 100 , evalue 2.77e-31 , alnlength 55 ,
Bacteria , Proteobacteria , WP_153296805.1 MULTISPECIES:
hypothetical protein [Wolbachia]"
/translation="MARIIFMGVDVSKEALDISINGKHKRIANVSDAISKFIETNIVD
LPIKLYVNWVL"
/product="hypothetical protein"
/besthit="qcoverage 100 , hcoverage 100 , similarity 100
, identity 100 , evalue 2.77e-31 , alnlength 55 ,
Bacteria , Proteobacteria , WP_153296805.1 MULTISPECIES:
hypothetical protein [Wolbachia]"
gene 3494..3799
/locus_tag="wEsol_00025"
CDS 3494..3799
/locus_tag="wEsol_00025"
/codon_start=1
/transl_table=11
/fullproduct="qcoverage 100 , hcoverage 100 , similarity
100 , identity 100 , evalue 2.23e-62 , alnlength 101 ,
Bacteria , Proteobacteria , WP_051062205.1 MULTISPECIES:
transposase [unclassified Wolbachia]"
/cog="COG3547 COG3547 303 Transposase and inactivated
derivatives"
/pfam="Transposase_20"
/product="transposase"
/translation="MPELGRLNREIACLVGVAPKTSESGRKVGKAQIKGGRFYARKA
LYMSALVAMRHNRMKAFYQRLVDSGKAAKVALVAVMRKIIIVCLNAMIKNNNFYLDLS"
/besthit="qcoverage 100 , hcoverage 100 , similarity 100
, identity 100 , evalue 2.23e-62 , alnlength 101 ,
Bacteria , Proteobacteria , WP_051062205.1 MULTISPECIES:
transposase [unclassified Wolbachia]"
gene 3875..5248
/locus_tag="wEsol_00026"
CDS 3875..5248
/locus_tag="wEsol_00026"
/codon_start=1
/transl_table=11
/fullproduct="qcoverage 100 , hcoverage 100 , similarity
100 , identity 100 , evalue 0.0 , alnlength 457 ,
Bacteria , Proteobacteria , WP_015589121.1 MULTISPECIES:
dihydrolipoyl dehydrogenase [unclassified Wolbachia]"
/cog="Lpd COG1249 454 Pyruvate/2-oxoglutarate
dehydrogenase complex, dihydrolipoamide dehydrogenase
(E3) component, and related enzymes"
/pfam="FAD_binding_3 Thi4 HI0933_like Pyr_redox_2 GIDA
DAO FAD_oxidored FAD_binding_2 Pyr_redox_3 NAD_binding_8
K_oxygenase 2-Hacid_dh_C Pyr_redox_FAD_binding_3 3HCDH_N
NAD_binding_8 HI0933_like Pyr_redox_3 DAO NAD_binding_9
Pyr_redox_dim"
/tigr="TIGR01350 lipoamide_DH 461 dihydrolipoyl
dehydrogenase"

```

```

/product="dihydrolipoyl dehydrogenase"
/translation="MNEYDITVIGSGPGGYIAAIRAAQLGFKTAIVEKEKNLGGICLN
WGCIPTKSLLRASEVYRLIKRSKEFGIEVKGANFDIQSIVKYSRNVVDKLSSGVAYLM
KKNNIKVHQFGKLAGNGTIKVVS DKEEQEIVSKHII LATGVRARNLP GIEADGDLIW
NAQHAMTPERLPKSLIIIGSGAIGIEFASFYSTLGVDVTIIEIKSTILPLEDKDISDL
AQEIFTKQGIKIYTNSSVKALTKSKDSAQVLLSSGESKEFDKIVIVAVGIQANIENIGL
ENTKIKLSPSGFIETNEWYETSESNVYAIGDVAGPPCLAHKASHEAVICIEKIAGKNA
HALKKECIPNCTYSH PQIASIGLTEEQAIKGGYDIKIGKFHSNFNGKSVALSETEGLV
KTIIDKKTGEILGSHMIGA EVTELISNFALAKQLEGTD FDIKSTIFPHPTISEMIHES
VLAADV K"
/besthit="qcoverage 100 , hcoverage 100 , similarity 100
, identity 100 , evalue 0.0 , alnlength 457 , Bacteria ,
Proteobacteria , WP_015589121.1 MULTISPECIES:
dihydrolipoyl dehydrogenase [unclassified Wolbachia]"
gene complement(5254..5646)
/locus_tag="wEsol_00027"
CDS complement(5254..5646)
/locus_tag="wEsol_00027"
/codon_start=1
/transl_table=11
/fullproduct="qcoverage 100 , hcoverage 100 , similarity
100 , identity 100 , evalue 1.14e-80 , alnlength 130 ,
Bacteria , Proteobacteria , WP_006279962.1 MULTISPECIES:
hypothetical protein [Wolbachia]"
/translation="MIVELKMPKSN SKKEPNEKNKPQE QREGRSGGFLELLKNI IKIL
FNSVVDLPEHEQHNMKSTNLQQGLDTKGKGPEDLHPKAKLEVKEAAKGLKEELQNSD
AGGNQSIETKVPNQTTTQDIDNSKTMER"
/product="hypothetical protein"
/besthit="qcoverage 100 , hcoverage 100 , similarity 100
, identity 100 , evalue 1.14e-80 , alnlength 130 ,
Bacteria , Proteobacteria , WP_006279962.1 MULTISPECIES:
hypothetical protein [Wolbachia]"
gene 5716..6747
/locus_tag="wEsol_00028"
CDS 5716..6747
/locus_tag="wEsol_00028"
/codon_start=1
/transl_table=11
/fullproduct="qcoverage 100 , hcoverage 100 , similarity
99.7 , identity 99.7 , evalue 3.75e-239 , alnlength 343 ,
Bacteria , Proteobacteria , WP_015589119.1 MULTISPECIES:
undecaprenyldiphospho-muramoylpentapeptide
beta-N-acetylglucosaminyltransferase [Wolbachia]"
/cog="MurG COG0707 357 UDP-N-acetylglucosamine:LPS
N-acetylglucosamine transferase"
/pfam="Glyco_transf_28 Glyco_trans_4_4 Glyco_trans_1_3
Glyco_tran_28_C"
/tigr="TIGR01133 murG 353
undecaprenyldiphospho-muramoylpentapeptide
beta-N-acetylglucosaminyltransferase"
/product="undecaprenyldiphospho-muramoylpentapeptide
beta-N-acetylglucosaminyltransferase"
/translation="MDIILATGGTGGHIFPAIALAKALKTQGYNCILFTDKKTNKNTD
IESYTLPLRRPSSNKFKFFLFLIYSSMLALYQVRKLKPKSVIGFGSYASFPTLLAARV
LSIPIILHEQNTVLGRVNRFFFKSAKLIATSF PETKYAEGNKCI FTGNFVDIKAQSHS
STEKILNILVIAGSQGANFFDDVVS RVICDLPIKMKKKIRVTQQCTKKNVNKVKSLYK
SEKIDCEELSEFFDDMENRLANAHLVISRAGATSIAEITLARRSAIYIPYPYSKDNHQF
YNAKYIEDSRAAIIVEQNSEAKKNLTEVLFDLLNNSQKL RDMTNST EKTGIKNGTTEF
VKVIVHRFS"
/besthit="qcoverage 100 , hcoverage 100 , similarity 99.7

```

```

, identity 99.7 , evalue 3.75e-239 , alnlength 343 ,
Bacteria , Proteobacteria , WP_015589119.1 MULTISPECIES:
undecaprenyldiphospho-muramoylpentapeptide
beta-N-acetylglucosaminyltransferase [Wolbachia]"
gene complement(6732..7661)
/locus_tag="wEsol_00029"
CDS complement(6732..7661)
/locus_tag="wEsol_00029"
/codon_start=1
/transl_table=11
/fullproduct="qcoverage 100 , hcoverage 100 , similarity
100 , identity 100 , evalue 2.21e-223 , alnlength 309 ,
Bacteria , Proteobacteria , WP_015589118.1 MULTISPECIES:
glutathione synthase [Wolbachia]"
/cog="RimK COG0189 318 Glutathione synthase/Ribosomal
protein S6 modification enzyme (glutaminy transferase)"
/pfam="GSH-S_N GSH-S_ATP ATPgrasp_YheCD RimK"
/tigr="TIGR01380 glut_syn 312 glutathione synthase"
/product="glutathione synthase"
/translation="MKIAFQMDENINFETDTTFVLIKEAQRRKHEVFVYAPNNLALKL
NHPIALAQKVSVDDFSISKEDVAINLNEMDIIFIRQDPPFDMRYITTTYILEKTSAL
VINNPTEIRNCPEKLITSLFPELIPPTLITENISMIRDFYNYQDIILKPLYSYGGND
VIRIQDENSIQVVVDLMIAYECPVIAQSFCKNIDKDKRILLLYGQPIGVMKRIPKIS
GEIRTNMRLGASFEP AQMNDNRNEICNKIGPELKKRGLIFVGIDIIDDFLEINTTSP
TGVVYINKLYNISLEKDLWDVFEEKASSHQLNL"
/besthit="qcoverage 100 , hcoverage 100 , similarity 100
, identity 100 , evalue 2.21e-223 , alnlength 309 ,
Bacteria , Proteobacteria , WP_015589118.1 MULTISPECIES:
glutathione synthase [Wolbachia]"
gene complement(7722..8318)
/locus_tag="wEsol_00030"
CDS complement(7722..8318)
/locus_tag="wEsol_00030"
/codon_start=1
/transl_table=11
/fullproduct="qcoverage 100 , hcoverage 100 , similarity
100 , identity 100 , evalue 1.02e-125 , alnlength 198 ,
Bacteria , Proteobacteria , WP_006279461.1 MULTISPECIES:
BON domain-containing protein [Wolbachia]"
/cog="OsmY COG2823 196 Predicted periplasmic or secreted
lipoprotein"
/pfam="BON BON"
/product="BON domain-containing protein"
/translation="MRLITSFLLAIFLITQSGCTTLIIGGVVATATATAITMQDKSLG
NIIDDTMVIRINKGLLKHGLFSSIKVKVSEGRVLLIGSVDTPEKQLTAEKIAWQQKE
IKEVINEIRVIPIQMASMLDTTVDGMITAEIRTRLLGKRNIKSINYSVNTVDRVVYLM
GIAQNKAELKAVIAIARKVKGVKQVVSYVRYRYSKLRH"
/besthit="qcoverage 100 , hcoverage 100 , similarity 100
, identity 100 , evalue 1.02e-125 , alnlength 198 ,
Bacteria , Proteobacteria , WP_006279461.1 MULTISPECIES:
BON domain-containing protein [Wolbachia]"
gene 8465..8623
/locus_tag="wEsol_00031"
CDS 8465..8623
/locus_tag="wEsol_00031"
/codon_start=1
/transl_table=11
/product="hypothetical protein"
/translation="MAELVDVPGLGPGELARGGSSPSIRTLKSCNLGFKGKFIITKYT
FVCVKTCS"

```

```

gene      8696..10033
          /locus_tag="wEsol_00032"
CDS       8696..10033
          /locus_tag="wEsol_00032"
          /codon_start=1
          /transl_table=11
          /fullproduct="qcoverage 99.7752808988764 , hcoverage 100
, similarity 100 , identity 100 , evaluate 7.48e-311 ,
alnlength 444 , Bacteria , Proteobacteria ,
WP_015589117.1 MULTISPECIES: trigger factor [unclassified
Wolbachia]"
          /cog="Tig COG0544 441 FKBP-type peptidyl-prolyl cis-trans
isomerase (trigger factor)"
          /pfam="Trigger_N FKBP_C Trigger_C"
          /tigr="TIGR00115 tig 410 trigger factor"
          /product="trigger factor"
          /translation="MMSNNIPQNTVEVSSVYTYKELSIDKLKYEYEITVGSDYIKQKV
NSRLQEIAENAKSPGFRAGKMPYDLVVANYKNEALEYVINNTIDYCSSDLMKKIEVKS
HIYPKVDVISLPDLGKENEENFVYKLSFESMPEVPMIDLKINLKKIEAKIEEEDIK
EFIDSIKTKFPNFASVDDASYQAKDGDKLIIDFEGRIRNKLQGGSSKDFAVNLGSGT
FINGFEDQLTGMKKGETKNFKLKFENYQAIISLAGQEADFSVRVNEIQIAKDFENDDE
IAKSIGFKDYSLLINHAKKMIGDQCTEMRNLLIKKELFDYLDANYSFDLPTDIVKQEQ
QRMEGELGAQNDSRKEAEKRVKLAMLFMKFSAEHKISLTQNDVLSVIVNQYVSKDVQF
DRVIKHFESNKQFQELVRGQALEYKVTDYIIEKVSKEEQIVSVKELKELFDNI"
          /besthit="qcoverage 99.7752808988764 , hcoverage 100 ,
similarity 100 , identity 100 , evaluate 7.48e-311 ,
alnlength 444 , Bacteria , Proteobacteria ,
WP_015589117.1 MULTISPECIES: trigger factor [unclassified
Wolbachia]"
gene      10045..10671
          /locus_tag="wEsol_00033"
CDS       10045..10671
          /locus_tag="wEsol_00033"
          /codon_start=1
          /transl_table=11
          /fullproduct="qcoverage 100 , hcoverage 100 , similarity
100 , identity 100 , evaluate 9.15e-143 , alnlength 208 ,
Bacteria , Proteobacteria , WP_006280254.1 MULTISPECIES:
ATP-dependent Clp endopeptidase proteolytic subunit ClpP
[Wolbachia]"
          /cog="ClpP COG0740 200 Protease subunit of ATP-dependent
Clp proteases"
          /pfam="CLP_protease Pfam-B_306"
          /tigr="TIGR00493 clpP 192 ATP-dependent Clp
endopeptidase, proteolytic subunit ClpP"
          /product="ATP-dependent Clp
endopeptidase proteolytic subunit ClpP"
          /translation="MTLPIVVEQTSRGERAYDIYSRLVKERIIFVTGPIEDNMA SVI
VAQLLFLESENPDKDICYINSPGGVVTAGLSIYDTMQYINPDVSTLCIGQAASMGSL
LLAAGTKGKRYSLPHSRIMIHQPSGGYHGQATDIEIHANEILRVKKLNQIYEKHTGN
SLKKIEGMMERDKFMDPEEARKIGLIDRVIAERTDIEIENIKVKQKVG"
          /besthit="qcoverage 100 , hcoverage 100 , similarity 100
, identity 100 , evaluate 9.15e-143 , alnlength 208 ,
Bacteria , Proteobacteria , WP_006280254.1 MULTISPECIES:
ATP-dependent Clp endopeptidase proteolytic subunit ClpP
[Wolbachia]"
gene      10671..11948
          /locus_tag="wEsol_00034"
CDS       10671..11948
          /locus_tag="wEsol_00034"

```

```

/codon_start=1
/transl_table=11
/fullproduct="qcoverage 100 , hcoverage 100 , similarity
100 , identity 100 , evalue 1.86e-301 , alnlength 425 ,
Bacteria , Proteobacteria , WP_006279985.1 MULTISPECIES:
ATP-dependent Clp protease ATP-binding subunit ClpX
[Wolbachia]"
/cog="ClpX COG1219 408 ATP-dependent protease Clp, ATPase
subunit"
/pfam="zf-C4_ClpX MCM PhoH DEAD Sigma54_activat T2SE
RuvB_N AAA_2 IstB_IS21 AAA_22 Mg_chelatase AAA_14 AAA_5
AAA_AAA_17 ClpB_D2-small"
/tigr="TIGR00382 clpX 414 ATP-dependent Clp protease,
ATP-binding subunit ClpX"
/product="ATP-dependent Clp
protease ATP-binding subunit ClpX"
/translation="MDNNNDLHYCSFCNKAQDEVDKLITNSSDGLKVFICNECIELSH
KAISQKKDRSFNSDRISDMKLLKLPEDIKNFLSKHVVGQEHQHVLSVAMYNHCQSM
VQFHAISDIEIEKSNIMLIGPTGSGKTLAKTLAKVSDVPFAMADATTLTEAGYVGDD
VESVLSRLLQAANYDVVKAQRGIVFIDEIDKITRKSESTSI TRDVS GEGVQQALLKIM
EGTVAYVPPQGGRKHPQQEFIQVDTSNILFICGGA FEGLDKIIEARKKGT SVGFGADI
SQSKEQKKKNALHDVQPEDLIKFLIPEFVGRVPITAVLDELHDHEDLIHVLTEPRNAL
IKQYKALLAFSKVNLEFSDEAISAIAKKAISYKTGARMLRAILESLLLDIMYTSNGG
FEGSTIVITKKMVELGKATVNHNNNGNVITVND"
/besthit="qcoverage 100 , hcoverage 100 , similarity 100
, identity 100 , evalue 1.86e-301 , alnlength 425 ,
Bacteria , Proteobacteria , WP_006279985.1 MULTISPECIES:
ATP-dependent Clp protease ATP-binding subunit ClpX
[Wolbachia]"
gene 11964..14417
/locus_tag="wEsol_00035"
CDS 11964..14417
/locus_tag="wEsol_00035"
/codon_start=1
/transl_table=11
/fullproduct="qcoverage 100 , hcoverage 100 , similarity
100 , identity 100 , evalue 0.0 , alnlength 817 ,
Bacteria , Proteobacteria , WP_141456951.1 MULTISPECIES:
endopeptidase La [unclassified Wolbachia]"
/cog="Lon COG0466 782 ATP-dependent Lon protease,
bacterial type"
/pfam="LON IstB_IS21 AAA_PrkA RuvB_N AAA_16 AAA_25 AAA_14
AAA_22 AAA_17 AAA_AAA_5 RNA_helicase AAA_24 AAA_3 AAA_2
Lon_C ChlI"
/tigr="TIGR00763 lon 795 ATP-dependent protease La"
/product="endopeptidase La"
/translation="MNIERAVSSSFTALPVLPLRDVVIFPNIMVPLFIGREKSVNALE
YAISSSNHQNEIFLVAQKDGSDNPEPEDLYEVLASIVQPLIKLPDNAVKVIIRGI
RRGRVVEYISSHTLLQARVELDNHYKEDEDNIDLEALRRSVVDAFDSWCKLNKKNQPE
VAINSIDQIKEVDQLVDTVASHLNIKVSDKQSILEAYDPEERLKKAFAFIEREMSILN
AQNRLYKTIKSQVESTQKVYYLNEQLKAIQKELGEFENGDEGNILNEFEKKINETKLS
QEAREKAITDLKRYKKMNPISPEATVISSYLHWLLELPWGKYKDAKINLNAAKKILDE
NHYGIEKVKDRIIEFLAVLKRVKEIKGPILCLVGPVGKTS LAKSMARAVGRDFVRI
ALGGVRDESEIRGHRKTYIGSMPGKIIQHMKKANSCNPLFLLDEIDKMGSDSRGDPAS
ALLEVLDTEHNKHFTDHYLEVEFDLSSVMFVATANSNLNPLPHLRDRMEI IQLSGYTED
EKISIATHHLIPKLKKEHGLYQKEWDITNEALYELIRLYTRESGVRSMERELAKLMRK
AVKEILTDKNKKISVGVDNLQDYLGVRYKTFGIAENESLVGIVTGLAYTETGGDILMI
ESVLIPGKGEIKYTGKLGEVMQESIKAAYSYIRSNCLFFGIKPEKFQNNDIHLHVPEG
AVPKDGPSAGGAVCTSIVSLMTNIPVNKNVAMTGEVTLRGRVLAIGGLREKLLAALRG
SIKTVIIPSENEKDMQEIPASIKEGINVVFKNIDEVMKVALMHPTPIDGDDNQNSV

```

```

PSSIESKDDTFPMSETLKH"
/besthit="qcoverage 100 , hcoverage 100 , similarity 100
, identity 100 , evalue 0.0 , alnlength 817 , Bacteria ,
Proteobacteria , WP_141456951.1 MULTISPECIES:
endopeptidase La [unclassified Wolbachia]"
gene complement(14414..14521)
/locus_tag="wEsol_00036"
CDS complement(14414..14521)
/locus_tag="wEsol_00036"
/codon_start=1
/transl_table=11
/product="hypothetical protein"
/translation="MNDITTKQVISLWDAQVGGLPDKREMEIDNIFLI"
/besthit="qcoverage 80 , hcoverage 71.7948717948718 ,
similarity 96.4 , identity 89.3 , evalue 5.63e-10 ,
alnlength 28 , Bacteria , Proteobacteria , RLT59764.1 ABC
transporter ATP-binding domain protein [Wolbachia
endosymbiont of Drosophila ananassae]"
gene 14701..15996
/locus_tag="wEsol_00037"
CDS 14701..15996
/locus_tag="wEsol_00037"
/codon_start=1
/transl_table=11
/fullproduct="qcoverage 100 , hcoverage 100 , similarity
99.8 , identity 99.8 , evalue 3.12e-287 , alnlength 431 ,
Bacteria , Proteobacteria , WP_141456953.1 MULTISPECIES:
sodium:proton antiporter [unclassified Wolbachia]"
/cog="NhaC COG1757 485 Na+/H+ antiporter"
/pfam="CitMHS Na_H antiporter DUF1686 Na_H antiporter"
/tigr="TIGR00931 antiport_nhaC 454 Na+/H+ antiporter
NhaC"
/product="sodium:proton antiporter"
/translation="MFYFTNFLPILLFLFLFVGSGIYFTVLGVSNAFYQLSPLVAIVP
AIALGWVLYKGNTEEKMYAFLDGVRDRNIITMCIIFLLAGAFSEVTKAIGSADATVNL
ALFSIPTQFLLIGLFFVAAFISTAIGTSMGTIATIAPIAVELTQAGISPSLG VATVVG
GAMFGDNLSIISDTTIASVMSQKADIKKKLKLNAKVALIASIFTIIILFYSSSNSAAI
SVKEYSLLLVTPIIILILLANFGINVFTALVLSITFAGIIGFINNNNYGLLFLSQNIT
KGFMSMHEIMLLSLMVGGLSGLVGKNSKELADKLSSWVMIQRGGQKTAQLFIAKIVSI
FDILLANNTIAIIFSGEIARDIAKKYEIPPHYSVAWLGI FSCVFQGLIPYGAQLLLAS
TIAGVSPLAVVPHVYYCYVLGIIAVLYIVLNKIEKKDCA"
/besthit="qcoverage 100 , hcoverage 100 , similarity 99.8
, identity 99.8 , evalue 3.12e-287 , alnlength 431 ,
Bacteria , Proteobacteria , WP_141456953.1 MULTISPECIES:
sodium:proton antiporter [unclassified Wolbachia]"
gene 15989..17281
/locus_tag="wEsol_00038"
CDS 15989..17281
/locus_tag="wEsol_00038"
/codon_start=1
/transl_table=11
/pfam="Pfam-B_19638 COX1 Pfam-B_19638 Pfam-B_19638"
/fullproduct="qcoverage 100 , hcoverage 100 , similarity
100 , identity 100 , evalue 1.66e-302 , alnlength 430 ,
Bacteria , Proteobacteria , WP_015589113.1 cbb3-type
cytochrome c oxidase subunit I [Wolbachia endosymbiont of
Drosophila simulans]"
/translation="MLNIQDNAPLCRKWMFLAVCALACSGLLSIIVIFLRLPFISLV
PSAQYIFDNALVIHVNL SILVWMCSIISLLFIINLQNTNSWFNFSWVLSTLSMLLMFI
SAFVPNTEVIKSNIYIPVLQNKLFLEGLSLFIASILVNTMLAYTSKKEVSFLSVGQIGL

```

```

VIILVSSFLCFVLAYNNMPPGLYHSDNNLFYEYLFWGGGHLLQFAFTQGMFLVYLMIS
DVSLASSNKITILPLFINTILAVGAPFVYFVYPVDSAKLIQFFTWHMRIAAGAVLPCFL
IILVCCNIRTFINDKSNYLLHSFLLFTYGDVLGVLTIIEGNVTIPAHYHGSVVGITIAF
MNFIYWLLPKLNFKEIKGSMVRLQIYAYSIGHFLHITGLVWLGGYGALRKVADLPSIS
SMLARTCFIIGGAISVVGGMFLVVIIVLLHLLKKGKARTN"
/product="cbb3-type cytochrome c oxidase subunit I"
/besthit="qcoverage 100 , hcoverage 100 , similarity 100
, identity 100 , evalue 1.66e-302 , alnlength 430 ,
Bacteria , Proteobacteria , WP_015589113.1 cbb3-type
cytochrome c oxidase subunit I [Wolbachia endosymbiont of
Drosophila simulans]"
gene 18567..20306
/locus_tag="wEsol_00039"
CDS 18567..20306
/locus_tag="wEsol_00039"
/codon_start=1
/transl_table=11
/fullproduct="qcoverage 100 , hcoverage 100 , similarity
100 , identity 100 , evalue 0.0 , alnlength 579 ,
Bacteria , Proteobacteria , WP_010962506.1 MULTISPECIES:
single-stranded-DNA-specific exonuclease RecJ
[Wolbachia]"
/cog="RecJ COG0608 491 Single-stranded DNA-specific
exonuclease"
/pfam="DHH DHHA1"
/tigr="TIGR00644 recJ 546 single-stranded-DNA-specific
exonuclease RecJ"
/product="single-stranded-DNA-specific exonuclease RecJ"
/translation="MLLEIEKRSITNALWKLQEADQRQILTTLTQRFELPEILARILVT
RGVNIENASDFLYPLIRSLLPDPFHLLDMDKAVSRIIRAIRKNDENLAIFGDYDVGAT
SSALINRYLRAIDIHSIIYIPDRVDEGYGLNTDALLQLKKNIDLCISVDCGTLAYQP
IEDAKAFGLDIIIVVDHHLGTEKLPSAVAVVNPRLDESSPYNNLAAVGVSFLLIVALN
KSLREQGFFTNKKEPDLFDLLDLVALGTVCDVMQITGLNRALVSQGLKVMSTRKNVGL
RVLFDALGILEKPSVSRLLGFSIGPCINAGGRIGEASLGARLLSTDDDEEAHSIALKLI
DLNNARKVLENEALLEATAQAESAQSGANFIMISGNWHQGIIGIIASRLKEQFHLPT
VVISLNNGIGKASCRSILGVDIGAAVLSAKFINLIIIEGGGHSMAAGFSIKEDKINDLH
DFFTERFSNSINEKTLKADSIVTAKAINLSLWNQLQRLGPFVGNGPEPRFIIQGAKIR
KPEVIGVDHIKCFIADDNVMVRAIAFRSANTHLGSAIMQGNVKAILGKISMNYWNGNE
FVQFLIEDVLTIS"
/besthit="qcoverage 100 , hcoverage 100 , similarity 100
, identity 100 , evalue 0.0 , alnlength 579 , Bacteria ,
Proteobacteria , WP_010962506.1 MULTISPECIES:
single-stranded-DNA-specific exonuclease RecJ
[Wolbachia]"
gene complement(21133..21939)
/locus_tag="wEsol_00040"
CDS complement(21133..21939)
/locus_tag="wEsol_00040"
/codon_start=1
/transl_table=11
/fullproduct="qcoverage 100 , hcoverage 100 , similarity
100 , identity 100 , evalue 9.12e-191 , alnlength 268 ,
Bacteria , Proteobacteria , WP_015589111.1 MULTISPECIES:
folate-binding protein YgfZ [unclassified Wolbachia]"
/cog="COG0354 COG0354 305 Predicted
aminomethyltransferase related to GcvT"
/pfam="GCV_T GCV_T_C"
/product="folate-binding protein YgfZ"
/translation="MSYIPFLSRGVIVLYGPDTRDFLQGIITNDINKLDSQKAIYSL
LSPQGGKYLDFFLIEYGYTLLECENMHLQQIIEKLDLLKTYLRVKIKDVSALYKVG

```

```

LFNTKLAECSGKSQVIFQDPRHKLLGMRIIHKDEIKEPVGDFTQYEEKVRIQNLVDPGA
KDMVQNSSFPLQFLIDKVNIGISFNKGCIYQEVVNRMSRQEIFRRKLYLVEGDNALPD
IGTKVTNENNEEIGELRSSVDNIGFALLNTGKSHANLYADGVRCVKTLKS"
/besthit="qcoverage 100 , hcoverage 100 , similarity 100
, identity 100 , evalue 9.12e-191 , alnlength 268 ,
Bacteria , Proteobacteria , WP_015589111.1 MULTISPECIES:
folate-binding protein YgfZ [unclassified Wolbachia]"
gene 22117..22407
/locus_tag="wEsol_00041"
CDS 22117..22407
/locus_tag="wEsol_00041"
/codon_start=1
/transl_table=11
/fullproduct="qcoverage 100 , hcoverage 100 , similarity
100 , identity 100 , evalue 7.12e-59 , alnlength 96 ,
Bacteria , Proteobacteria , WP_007549140.1 MULTISPECIES:
co-chaperone GroES [Wolbachia]"
/cog="GroS COG0234 96 Co-chaperonin GroES (HSP10)"
/pfam="Cpn10"
/product="co-chaperone GroES"
/translation="MSSISLNVLDSDSLIKPISEKQGGIVLPSSAEKKPTKGEVIAI
GEGSRNSSGERVTLTVKAGDKVFYRQWAGTEIEHNDEKLIVMKESDILAVIK"
/besthit="qcoverage 100 , hcoverage 100 , similarity 100
, identity 100 , evalue 7.12e-59 , alnlength 96 ,
Bacteria , Proteobacteria , WP_007549140.1 MULTISPECIES:
co-chaperone GroES [Wolbachia]"
gene 22508..24157
/locus_tag="wEsol_00042"
CDS 22508..24157
/locus_tag="wEsol_00042"
/codon_start=1
/transl_table=11
/fullproduct="qcoverage 100 , hcoverage 100 , similarity
100 , identity 100 , evalue 0.0 , alnlength 549 ,
Bacteria , Proteobacteria , WP_141456977.1 MULTISPECIES:
chaperonin GroEL [unclassified Wolbachia]"
/cog="GroL COG0459 524 Chaperonin GroEL (HSP60 family)"
/pfam="Cpn60_TCP1"
/tigr="TIGR02348 GroEL 526 chaperonin GroL"
/product="chaperonin GroEL"
/translation="MTNVVVSQEQLQEAFREVA AIVDSTVAITAGPRGKT VGINPKPYG
APEITKDG YKVMKG I KPEKPLNAVIASIFAQSCSQCNDKVG DGTTC SILTSNMIMEA
SKSIAAGNDRVGIKNGIQKAKDVILKEITSMSTISLEKIDEVAQVAIISANGDKDIG
NSIADSVKKVGKEGVITVEESKGSKELEVELTTGMQFDRGYLSPYFITNNEKMIVELD
NPYLLITEKKLNIIQPLLPIL E AIVKSGKPLV IIAEDIEGEALSTLVINKLRGGLKVA
AVKAPGFGDRRKEMLEDIATLTGAKYVIKDELGIKMEDLTLDLGTAKNVKITKDNTT
VVSSENSDS SVKARIEQIKSQIETSTSDYDKEKLRLERLAKLSGGVAVLVGGATEVEV
KERRDRVEDALHATRAAIEEGIVPGGGVALLYASSVLDKLGASDEEQIGINI IKKVL
SAPIRRLVKNAGLES A VIIDYLIKQNDKELIYNVEAMNYANAFTAGVIDPAKVVR IAF
ETAVSVASVLITTESMIVDVPSKENASSPMGAGEMSGMGGF"
/besthit="qcoverage 100 , hcoverage 100 , similarity 100
, identity 100 , evalue 0.0 , alnlength 549 , Bacteria ,
Proteobacteria , WP_141456977.1 MULTISPECIES: chaperonin
GroEL [unclassified Wolbachia]"
gene complement(24711..27836)
/locus_tag="wEsol_00043"
CDS complement(24711..27836)
/locus_tag="wEsol_00043"
/codon_start=1
/transl_table=11

```

```

/pfam="AsmA_2 DUF3971 AsmA_2 AsmA_1"
/fullproduct="qcoverage 100 , hcoverage 100 , similarity
99.9 , identity 99.9 , evalue 0.0 , alnlength 1041 ,
Bacteria , Proteobacteria , WP_015589123.1 MULTISPECIES:
AsmA-like C-terminal domain-containing protein
[unclassified Wolbachia]"
/translation="MLKKITVLFVSALLFILCFFIFLKPLEININYNVNFYVKKHISKI
FVGSSVNVENISVVWQKGSKDPYLVITDLAIANPNFTIKVPELFFVHFKLSSLFKGNIK
FSQVLADNVRVYIKREEINVNPQNSLDLLDNHYLSNNRLPSVSFQRTLESRKKETSS
QATWMTGKKDIGMTGKKDTGMTGKNFKMTTESSAKNLLKTIREFFFDLNADSKIEFTNI
AINKGTEDEFFIDKLYIGKGEDFNVLDIHVNTKDEKGFLLDLSITIKNRNLLNLYGT
FYDLKLGLLSEFSTLVKSYNLDKNIGFKGSFSVKINKKDEIVDGNIVLNTENYLNKN
LALTNNVNLTYSNGLISVKNFHFKLNDTYLSLIGKMNFGTSHALLRINISKFAAKDL
CTYIPDSVVNSKFKSWYCDNIDGDLNTIVSFNGKINNLDVDDLSDIVIVADIENGSV
KFDEDFEQVKELKGDLLIKNNLEITVNSAKFQNFNTVNGGDIEMKSLNKEDSVLTING
KAVSDAYGLYEPPIRFKLDDVVKVERDKVSGMAKSVFNFRIFNLNADDKKVDFSANFHS
EIDNLAVYNASLGKYDIKLSFGSDFIDLNGSGMVNNTQLLFDLKSSNRNESFAWNLTG
DLPAQIFNFDSGYVSANLESVINQDKTGYVNGDIDLSEFESHSSYLGWKNRFEDHNKI
LFSTRKLGAGELLVDKLDIVGNDLDIKFSGRVENGNYLNSSSFKLDPDNDFSIEIESG
KEKNAITIYGEEINLSDILGLLGKNSNGLNKDIEISMNVNDVMIMKEGIVIKNAKLNT
CTKGNCNGSQFTGQFLEDSSNILAEYSIGLEIYADNSGMLLRSLGISKSIKNGKLSF
YLSPPQRESGEHYGTLSISNFYIKDAPLLTTLLSMSSLPGIVNAIKNEGVYFYKCNAPF
SYKDGITIEIESWLEGAELGISTGGKLDIRNYKFQVAGQVIPAYSINKSLLKIPIIGK
LLTGKSRGIVSIDYKASGDDKNNNVSVDLISSLTPNLLKRLLGVFDRIMTKTNESGL
KGGVKKKFGSI"
/product="AsmA-like C-terminal domain-containing protein"
/besthit="qcoverage 100 , hcoverage 100 , similarity 99.9
, identity 99.9 , evalue 0.0 , alnlength 1041 , Bacteria
, Proteobacteria , WP_015589123.1 MULTISPECIES: AsmA-like
C-terminal domain-containing protein [unclassified
Wolbachia]"
gene complement(27829..28266)
/locus_tag="wEsol_00044"
CDS complement(27829..28266)
/locus_tag="wEsol_00044"
/codon_start=1
/transl_table=11
/fullproduct="qcoverage 100 , hcoverage 100 , similarity
100 , identity 100 , evalue 9.71e-105 , alnlength 145 ,
Bacteria , Proteobacteria , WP_015589124.1 MULTISPECIES:
ribonuclease HI [unclassified Wolbachia]"
/cog="RnhA COG0328 154 Ribonuclease HI"
/pfam="RNase_H"
/product="ribonuclease HI"
/translation="MSKKEVTIYTDGACSGNPGAGGWAAIILFQDYRKDIYGREENTT
NNKMELTAVINGLKVLFKFCNINLYTDSLYVKHGITEWINKWKMNWGKTSNKKSVKNM
ELWKELDNVALQHEIDWKWVKAHSGDKYNEEADSLARKAIINA"
/besthit="qcoverage 100 , hcoverage 100 , similarity 100
, identity 100 , evalue 9.71e-105 , alnlength 145 ,
Bacteria , Proteobacteria , WP_015589124.1 MULTISPECIES:
ribonuclease HI [unclassified Wolbachia]"
gene complement(28443..29330)
/locus_tag="wEsol_00045"
CDS complement(28443..29330)
/locus_tag="wEsol_00045"
/codon_start=1
/transl_table=11
/fullproduct="qcoverage 100 , hcoverage 100 , similarity
100 , identity 100 , evalue 2.00e-203 , alnlength 295 ,
Bacteria , Proteobacteria , WP_015589125.1 MULTISPECIES:

```

```

heme o synthase [unclassified Wolbachia]"
/cog="CyoE COG0109 304 Polyprenyltransferase (cytochrome
oxidase assembly factor)"
/pfam="UbiA"
/tigr="TIGR01473 cyoE_ctaB 281 protoheme IX
farnesyltransferase"
/product="heme o synthase"
/translation="MYTSVLLNVESTILDWFRLKPRIMYLVVFTAVAGMVAAPGGMH
PFLALISLICVALGSGSAGAINMWYDRDIDLLMERTKNRPIPSGRVSAESALEFGITL
GILSVFIMAIAVNYISAALLAISILFYVFVYTIWLKRRTQPONIVIGGAAGAFPPMIGW
AAVTNSVSWESFILFLVIFMWTPPHFWALSLNKSEYVKASIPMFNIVYGPKKTRKYI
LIYSVLLVLTSLPALFLKKALLYLSMATFEGCVFIWYAISILRFKNHSSQKKMFSYS
ISYLFSLFASIIIFCSIDLF"
/besthit="qcoverage 100 , hcoverage 100 , similarity 100
, identity 100 , evalule 2.00e-203 , alnlength 295 ,
Bacteria , Proteobacteria , WP_015589125.1 MULTISPECIES:
heme o synthase [unclassified Wolbachia]"
gene complement(29332..30882)
/locus_tag="wEsol_00046"
CDS complement(29332..30882)
/locus_tag="wEsol_00046"
/codon_start=1
/transl_table=11
/fullproduct="qcoverage 100 , hcoverage 100 , similarity
100 , identity 100 , evalule 0.0 , alnlength 516 ,
Bacteria , Proteobacteria , WP_015589126.1 MULTISPECIES:
cytochrome c oxidase subunit I [unclassified Wolbachia]"
/cog="CyoB COG0843 566 Heme/copper-type cytochrome/quinol
oxidases, subunit 1"
/pfam="Pfam-B_15059 COX1 Pfam-B_523"
/tigr="TIGR02891 CtaD_CoxA 504 cytochrome c oxidase,
subunit I"
/product="cytochrome c oxidase subunit I"
/translation="MSDVPKGIKRWLFSTNHKDIGTLYIIFSILAGIIGGLLSVIIRT
QLMHINILNNNYQLYNVMVTGHALIMVFFMIMPALMGFGNWFVPLMIGAPDMAFPRM
NNLSFWLLVSSFILLILSVFIGEGPGTGWTLYPPLSQVM SHPSAGVDIAILALHVAGM
SSIVGAINFIVTIFNMRAKGMSLTCKMPLFVWSVLLTAFMLIVALPVLGAIITMLLTDR
NIGTSFFDPAGGGDPVLFQHLFWFFGHPEVYVYIIFPAFGIISQVVSTFSHRPVFGYIG
MVYAMIGIAVFGFMVWAHMFMTVGLSADAAFFSTTTIFIGVITGVKVFWSWIATMWGG
AIEFKTPMLFALGFIFMFVGGGITGIILSHGGIDKLLHDTYYVVAHFHYVMSLAALFG
AFAGFYWIGKMSGKQYNERLGQIHFWLTFISTNITFLPQHFLGLAGMPRRIPDYPDA
FIPWNYISSIGSYMFSVSMFFVFIVIHLEFKWGGKAGDNPWKGD TLEWTVSSPPPFHT
FEKPPVVK"
/besthit="qcoverage 100 , hcoverage 100 , similarity 100
, identity 100 , evalule 0.0 , alnlength 516 , Bacteria ,
Proteobacteria , WP_015589126.1 MULTISPECIES: cytochrome
c oxidase subunit I [unclassified Wolbachia]"
gene complement(30898..31662)
/locus_tag="wEsol_00047"
CDS complement(30898..31662)
/locus_tag="wEsol_00047"
/codon_start=1
/transl_table=11
/fullproduct="qcoverage 100 , hcoverage 100 , similarity
100 , identity 100 , evalule 4.16e-180 , alnlength 254 ,
Bacteria , Proteobacteria , WP_015589127.1 MULTISPECIES:
cytochrome c oxidase subunit II [unclassified Wolbachia]"
/cog="CyoA COG1622 247 Heme/copper-type cytochrome/quinol
oxidases, subunit 2"
/pfam="COX2_TM Polysacc_synt COX2"

```

```

/tigr="TIGR02866 CoxB 202 cytochrome c oxidase, subunit
II"
/product="cytochrome c oxidase subunit II"
/translation="MVKLFALLIIFYSNISVASAPTSWQFGFPAPATEVMEAVVRSHS
FVMLVMVTIMLFVWALLAYIAFRFRKSKVTNISKTTTHSVPLEIIFVFIPTIIVGILAF
ENAKLLKLQEEIPKADITLKVIGHQWYWSYQYPEYQGVSFDSYIKGKEDFIEGDLKLF
SVDNNIVLPVNANVRLQVTAGDVIHSWGVPAFGVKIDAIPGRLNEAWFNIKKPGVYYG
QCYELCGQGHGFMPIVVEAVSKEDFNKWIENRKLVS"
/besthit="qcoverage 100 , hcoverage 100 , similarity 100
, identity 100 , evalue 4.16e-180 , alnlength 254 ,
Bacteria , Proteobacteria , WP_015589127.1 MULTISPECIES:
cytochrome c oxidase subunit II [unclassified Wolbachia]"
gene complement(33189..33353)
/locus_tag="wEsol_00048"
CDS complement(33189..33353)
/locus_tag="wEsol_00048"
/codon_start=1
/transl_table=11
/fullproduct="qcoverage 100 , hcoverage 100 , similarity
100 , identity 100 , evalue 2.06e-28 , alnlength 54 ,
Bacteria , Proteobacteria , WP_167482801.1 hypothetical
protein [Wolbachia endosymbiont of Carposina sasakii]"
/cog="Tra5 COG2801 232 Transposase and inactivated
derivatives"
/pfam="rve"
/product="hypothetical protein"
/translation="MSSSINKQLVMDSLMDVNRKPKAKNLLHSDQGSQYTLQGYQY
LLSIKNIDES"
/besthit="qcoverage 100 , hcoverage 100 , similarity 100
, identity 100 , evalue 2.06e-28 , alnlength 54 ,
Bacteria , Proteobacteria , WP_167482801.1 hypothetical
protein [Wolbachia endosymbiont of Carposina sasakii]"
gene complement(33894..34076)
/locus_tag="wEsol_00049"
CDS complement(33894..34076)
/locus_tag="wEsol_00049"
/codon_start=1
/transl_table=11
/fullproduct="qcoverage 85 , hcoverage 89.4736842105263 ,
similarity 100 , identity 100 , evalue 7.96e-26 ,
alnlength 51 , Bacteria , Proteobacteria , WP_210446103.1
transposase, partial [Wolbachia endosymbiont of
Drosophila melanogaster]"
/cog="COG2963 COG2963 116 Transposase and inactivated
derivatives"
/pfam="HTH_Tnp_1 HTH_23 HTH_28"
/product="transposase, partial"
/translation="MAREYTAEFKLEAVKLANEQRKVGQPVAKVARDLGIRDSVLGKW
MKKYNEKSQRQMHFQM"
/besthit="qcoverage 85 , hcoverage 89.4736842105263 ,
similarity 100 , identity 100 , evalue 7.96e-26 ,
alnlength 51 , Bacteria , Proteobacteria , WP_210446103.1
transposase, partial [Wolbachia endosymbiont of
Drosophila melanogaster]"
gene complement(34095..34202)
/locus_tag="wEsol_00050"
CDS complement(34095..34202)
/locus_tag="wEsol_00050"
/codon_start=1
/transl_table=11

```

```

/fullproduct="qcoverage 100 , hcoverage 100 , similarity
100 , identity 100 , evaluate 1.13e-13 , alnlength 35 ,
Bacteria , Proteobacteria , AAS14033.1 hypothetical
protein WD_0297 [Wolbachia endosymbiont of Drosophila
melanogaster]"
/translation="MNNKNKSKDRKKEIEFRIDLTQKKWREKKEFFRVK"
/product="hypothetical protein"
/besthit="qcoverage 100 , hcoverage 100 , similarity 100
, identity 100 , evaluate 1.13e-13 , alnlength 35 ,
Bacteria , Proteobacteria , AAS14033.1 hypothetical
protein WD_0297 [Wolbachia endosymbiont of Drosophila
melanogaster]"
gene complement(34399..34566)
/locus_tag="wEsol_00051"
CDS complement(34399..34566)
/locus_tag="wEsol_00051"
/codon_start=1
/transl_table=11
/product="hypothetical protein"
/translation="MKKMSPIDGFRMLLRTLDVLFSTFINPSIKRLKRLANGCYEFGA
VGDIKDTLFGV"
gene 35188..36435
/locus_tag="wEsol_00052"
CDS 35188..36435
/locus_tag="wEsol_00052"
/codon_start=1
/transl_table=11
/pfam="Pox_D5 RVT_1 GIIM"
/fullproduct="qcoverage 100 , hcoverage 100 , similarity
100 , identity 100 , evaluate 7.62e-314 , alnlength 415 ,
Bacteria , Proteobacteria , WP_155968744.1 group II
intron reverse transcriptase/maturase [Wolbachia
pipientis]"
/translation="MNKTKSFDIPKQLIWKAYKQVSKNRGAAGVDEVSITKFEENLKD
NLYKLWNRMSSGSYFPESVKAVAIPKDTGGQRTL CVPSVFDRIGQTAATMYLEPLVEP
EFHEDSYGYRPNKSALDAVSTACKRCWRSDWTIDLDISGFFDNL DHVLALQTIKKHTD
CKWVILYVERWMKAPIQLADGSKVVRNKGVPQGGSVSPIISNIFMHAFDMWMRQNY P
TIPFERYVDDAMVHCKTQKQAKFIKDKIEERLAEFKLKLHPEKTQIVYCKDDNRRDEF
PIQSFDLFGYTFRPRLAKNNKIGNYFVSFLPAISNKAKKKINQTIRSWKIRRQTYTTL
EKISKKINPIVRGWYQYYGRFYKSEMYPSLRNVEWHLVGWVRAKYKKLRNHRRLAKQF
LAKVRKRSPNIFYHWTGLGLSGK"
/product="group II intron reverse transcriptase/maturase"
/besthit="qcoverage 100 , hcoverage 100 , similarity 100
, identity 100 , evaluate 7.62e-314 , alnlength 415 ,
Bacteria , Proteobacteria , WP_155968744.1 group II
intron reverse transcriptase/maturase [Wolbachia
pipientis]"
gene 36455..36649
/locus_tag="wEsol_00053"
CDS 36455..36649
/locus_tag="wEsol_00053"
/codon_start=1
/transl_table=11
/fullproduct="qcoverage 100 , hcoverage 100 , similarity
100 , identity 100 , evaluate 1.64e-36 , alnlength 64 ,
Bacteria , Proteobacteria , WP_213863496.1 hypothetical
protein [Wolbachia endosymbiont of Ceratitidis capitata]"
/translation="MRGLRTVLRETGGEAPPVYSPSGFPIVL SKFLGARNDYSLKRIL
ATEKNEDIFIRKKRGKNREN"
/product="hypothetical protein"

```

```

gene      /besthit="qcoverage 100 , hcoverage 100 , similarity 100
          , identity 100 , evalue 1.64e-36 , alnlength 64 ,
          Bacteria , Proteobacteria , WP_213863496.1 hypothetical
          protein [Wolbachia endosymbiont of Ceratitis capitata]"
          36828..37892
CDS       /locus_tag="wEsol_00054"
          36828..37892
          /locus_tag="wEsol_00054"
          /codon_start=1
          /transl_table=11
          /product="hypothetical protein"
          /pfam="Ank_2 Ank_4 Ank_5 Ank Ank_3 Ank_2 Ank Ank_3 Ank_5
          Ank_4 Pfam-B_1873 Ank_5 Ank Ank_3 Ank_4 Ank_2 Ank_5 Ank
          Ank_4 Ank_3 Ank_5 Ank Ank_3 Ank_2 Ank_5 Ank Ank_4 Ank_3
          Pfam-B_1714 Ank Ank_3 Ank_5 Ank_4 Pfam-B_10896 Ank_5
          Ank_4 Ank Ank_3 Ank_2 Ank Ank_3 Ank_5"
          /translation="MFTNRISNNLDQLQFFVEFLNENYEIQKHLSTPLHLAAGNGQL
          DLVNTLLGEGLDINSEIKYDGFTPLYFSIAKNRLEMVNFLIAHGADVNHKTIILGFTPL
          SFASQQGYLDIVNTLIANGADLSTKTDKLNTPHLAAENGHLDIVNVFIEKGLDVNAV
          NNDRARPLHSAVQNGNLEVVKALISQGSNINAGSSGIGNHKVDANITPLHLGTQTGRL
          DIVKVLLEAGANVNAKTDDKITPLHLASQNGFLELVDILLKAKSNVNAKDYENLTPLH
          LAAERNHFGVVKSLLLVRGIDVNAKDHDNSTALHIGSQNGHLEVVKLLIEKKANVNAK
          KRRRFYTFASSNSAKSFRGE"
          /besthit="qcoverage 93.2203389830508 , hcoverage
          69.7674418604651 , similarity 99.7 , identity 99.7 ,
          evalue 1.59e-39 , alnlength 330 , Bacteria ,
          Proteobacteria , WP_179947094.1 ankyrin repeat
          domain-containing protein, partial [Wolbachia
          endosymbiont of Bemisia tabaci]"
gene      37852..39429
          /locus_tag="wEsol_00055"
CDS       37852..39429
          /locus_tag="wEsol_00055"
          /codon_start=1
          /transl_table=11
          /product="hypothetical protein"
          /pfam="Ank_3 Ank_2 Ank Ank_4 Ank_5 Pfam-B_1873 Ank_5
          Ank_3 Ank Ank_2 Ank_4 Ank_5 Pfam-B_10896 Ank Ank_3 Ank_4
          Ank_5 Pfam-B_1873 Ank Ank_4 Ank_3 Ank_2 Ank_5
          Pfam-B_10896 Ank_4 Ank Ank_3 Ank_5 Ank_4 Ank_3 Ank Ank_5
          Ank Ank_4 Ank_3 Ank_2 Ank Ank_4 Ank_2 Ank_5 Ank Ank_3
          Ank_4 Shigella_OspC Pfam-B_1714 Ank_5 Ank Ank_3 Ank_2
          Ank_5 Ank Ank_3 Ank_4 Ank_2"
          /translation="MHLAIQQSHFEVSDFLIKNGANINTVDDQNWTPHLNAAAYNGFSL
          KIVESLIAKGANINAKMDDGRRALHLAAEHNRLIIMNFLIENGADINALDNRSWTPLH
          CAAYDGNLEVAKSLLDKGADINAKTVKSTTPLHFVAVDHDHLEVVELLLEKEADINALD
          HTNWTPLHFAAEKGYDQIATVLLKHGADVNVKENQNKGTALHLAAQYGHKPVVKTLLI
          NGADVNAKMDKNATPLHLGAQIGNLDIVRSLLMSGAYFNARAEGGRYVPLHFAERRG
          NPEVIKLLKLVEKLFKAIEDNNYLGIESSIRDGAIIDSKNVGDGRTPHLYAVNNGHIKV
          VNILLTNGANVSQVTNKGNTPLHTATSKCYKEIVEVLLQHISRDKLNDFVNAKTTSSG
          TTSLLHVAAGGSLEVVKSLKHAIFYNIKNKEGKAPLDLSRDQNTNLLKLVEELFEN
          AKNGNVEIISKLKAIKPDERVAVTNARDDQGKSLVQVAVINKHSNLASRLLEILKSPD
          QSLQDVSVENRVKSLKL"
          /besthit="qcoverage 63.8095238095238 , hcoverage
          97.3837209302326 , similarity 86.9 , identity 85.4 ,
          evalue 2.41e-126 , alnlength 335 , Bacteria ,
          Proteobacteria , WP_179947054.1 ankyrin repeat
          domain-containing protein, partial [Wolbachia
          endosymbiont of Bemisia tabaci]"
gene      39965..40726

```

CDS

```

/locus_tag="wEsol_00056"
39965..40726
/locus_tag="wEsol_00056"
/codon_start=1
/transl_table=11
/fullproduct="qcoverage 100 , hcoverage 100 , similarity
95.3 , identity 92.5 , evalue 8.45e-159 , alnlength 253 ,
Bacteria , Proteobacteria , WP_197907410.1 NTP
transferase domain-containing protein [Wolbachia
endosymbiont of Kradibia gibbosae]"
/cog="GlmU COG1207 460 N-acetylglucosamine-1-phosphate
uridyltransferase (contains nucleotidyltransferase and
I-patch acetyltransferase domains)"
/pfam="IspD NTP_transf_3 NTP_transferase"
/tigr="TIGR01173 glmU 452 UDP-N-acetylglucosamine
diphosphorylase/glucosamine-1-phosphate
N-acetyltransferase"
/product="NTP transferase domain-containing protein"
/translation="MDNTLIILAAGKSSRMNSEYPKALHQVGNLTLLLEHIISNAKLLS
LKSLSIIVNNSLLKDLEKFDTLKSIIDQYNIKLIIQEDITGTGTAVKIALENLEELSD
QDIVLIQYGDTPFISSDTVMKMTDCLKCNKNLVLGFGNSQDKQYGRLLVDDNDNVQK
VLKSEDEILLANSIMVSYAKDLYTLIKEVKFNDSTNECCLNDIPIAASNNLRAGYV
VADEKEAMGVNNKEDLVKAERYFQANRRRQPTLLS"
/besthit="qcoverage 100 , hcoverage 100 , similarity 95.3
, identity 92.5 , evalue 8.45e-159 , alnlength 253 ,
Bacteria , Proteobacteria , WP_197907410.1 NTP
transferase domain-containing protein [Wolbachia
endosymbiont of Kradibia gibbosae]"

```

gene

40858..41817

CDS

```

/locus_tag="wEsol_00057"
40858..41817
/locus_tag="wEsol_00057"
/codon_start=1
/transl_table=11
/fullproduct="qcoverage 100 , hcoverage 100 , similarity
99.7 , identity 99.4 , evalue 1.40e-231 , alnlength 319 ,
Bacteria , Proteobacteria , WP_015588901.1 MULTISPECIES:
NAD(P)-dependent oxidoreductase [unclassified Wolbachia]"
/cog="WcaG COG0451 314 Nucleoside-diphosphate-sugar
epimerases"
/pfam="RmlD_sub_bind Epimerase NAD_binding_10
Polysacc_synt_2_3Beta_HSD NAD_binding_4 NAD_binding_4
Polysacc_synt_2 Epimerase_Csub"
/tigr="TIGR01179 gale 332 UDP-glucose 4-epimerase"
/product="NAD(P)-dependent oxidoreductase"
/translation="MGILITGAAGLIGSALVEKLEKQGYEVISCDIRFRDNPLSFFSE
DIMPLAKCTGVIHLAAISRVIHGELYPKLCQKVNVDGTIQFLEFCKSLPNKPWFIYA
SSREVVYGEQKELPVAESASINPINNYAKGKAFIEEQVINLKGSNFNVAILRFSNVYGG
LLDHSSRVIPALCINALKGDPRIEGKECVDFDFTYLLDDVIEGIYLTVKYLQNEKSSLP
AIHLTTNSPCTLENLAKTILKVTESDSRIDFYPPRNFDVTKFHGDFTRAKELLGWSPK
HSLEVGLSKFIKSLQNNQTQEYPNNIDMVIYENIKSYSWLPSLL"
/besthit="qcoverage 100 , hcoverage 100 , similarity 99.7
, identity 99.4 , evalue 1.40e-231 , alnlength 319 ,
Bacteria , Proteobacteria , WP_015588901.1 MULTISPECIES:
NAD(P)-dependent oxidoreductase [unclassified Wolbachia]"

```

gene

41774..44101

CDS

```

/locus_tag="wEsol_00058"
41774..44101
/locus_tag="wEsol_00058"
/codon_start=1

```

```

/transl_table=11
/pfam="Glyco_transf_4 Glyco_trans_4_4 Glyco_trans_4_2
Pfam-B_15682 Glycos_transf_1 Glyco_trans_1_4 Radical_SAM
Fer4_14 DUF4008"
/fullproduct="qcoverage 100 , hcoverage 100 , similarity
99.5 , identity 97.4 , evalue 0.0 , alnlength 775 ,
Bacteria , Proteobacteria , WP_226079611.1
glycosyltransferase [Wolbachia endosymbiont of Tribolium
confusum]"
/translation="MKILKVIHGYPPIYSAGSEVYSQTLAHELANNNEVQVFTRYENS
FLPDFYYTTVLDSSDSRILLHLINIPTAKYRYKFINEEVDIQFKRVIDNFQPDLIHFG
HLNHLISITLPEIAFKENIPTIFTLHDFWLMCPGRFQIQRNSEDLLRLCDGQKDQKCAT
QCYKGYFTGDEEFLNSDLNYWEQWVATRMKQTKKVVDYIDYFIAPSKFLMDKFTQDFN
VPINKISYLDYGFDLNLKNNRVQEKEFIFGYIGTHTPEKGVDLLLKAFSRLSSKAK
LRIWGAAREETKALKAIADQFSPVVKERIEWMGSYDNKNIVTDVFNKVDAIVVPSIWG
ENSPLVIHEAQQLRIPVITADYGGMAEYVKDGLLFKHRDASSLSEKMQVLSTNQELYN
KLTQKGYPYTENGNIPISEHTEKLNKIYRNAIEKKGKSVAVKPGPWRTFDTNPDYC
NFSCIMCECFSPYSKVKEEKAKGKPKILSIETIRKVIKEAAGTPLREIIPSTMGEP
LMYKSFDEIINLCHEFGLKLNLTNGSFPIKGARKWAELLVPILSDVKISWNGATKET
HERIMKGSKEVVVTENLKTFLVVRDKYFSDTGERCTVTLQLTFLESNLHELYDIVKMA
IKNGIDRVKGHHLWAHFEEIKDLSMRRDELAISRWNTEVRRLYELRDNILLPNGKKIK
LENFTILSQEGIKDLAPGGQCPFLGKEAWINNEGKFSPCCAPDELKRTLGNFGNVNEV
KLEEIWQSSEYLNQLKYNLYELCKTCNMKPLVN"
/product="glycosyltransferase"
/besthit="qcoverage 100 , hcoverage 100 , similarity 99.5
, identity 97.4 , evalue 0.0 , alnlength 775 , Bacteria ,
Proteobacteria , WP_226079611.1 glycosyltransferase
[Wolbachia endosymbiont of Tribolium confusum]"
gene 44062..45756
/locus_tag="wEsol_00059"
CDS 44062..45756
/locus_tag="wEsol_00059"
/codon_start=1
/transl_table=11
/pfam="Pfam-B_323"
/fullproduct="qcoverage 100 , hcoverage 100 , similarity
100 , identity 100 , evalue 1.36e-288 , alnlength 564 ,
Bacteria , Proteobacteria , WP_006280066.1 MULTISPECIES:
WG repeat-containing protein [Wolbachia]"
/translation="MQNMQHEKTISQLMKDSEYLKSIRVSPCERFHQLSENPLYKNRF
IRVDKFHEPGLAPVYDETGAYHIDAMGEAIYRDRFLKTFGFYCNRAAVEDDTGYYHID
PSGCRVYKHSYQWIGNYQEDICVIRKHKDKFFHIDLNGNRVYEQYNYVGDFKDGIAVV
HKDGKATHINNHGKLVHNKWKLNLFHKGFAIAEDKHGWFHIDINGNPVYRQRFKRV
EAFYNGMAKVETFEGLVGLQIDITGNVKFSIFDLKESQVHKISAELSAFWKTYLANVA
IELDLLNILPATMPVLSQKLNIIVPNLERLLRALWEIGFIDYDKNKDLWLSSKGKCF
KEIPFLPKAAAMWARVAAEKNWLKIADILRQESISSFESFKEKETSEDRIAFYQALL
GYSRFDTKFNSRVNIDGAKNILLFGVHSLFLAYSIDIHNKGSIGLYYYNEHKVPRQAV
EDLKIKLITQEELSATNYELGVFCRFLQHYDDNKVLSYLKLVKNKGIPRVLVIETILD
YYSPVGGSDINVMVETGGKLRTLSDWKRLKQVKGLKIFSIVPLTDYLSVIDIRC"
/product="WG repeat-containing protein"
/besthit="qcoverage 100 , hcoverage 100 , similarity 100
, identity 100 , evalue 1.36e-288 , alnlength 564 ,
Bacteria , Proteobacteria , WP_006280066.1 MULTISPECIES:
WG repeat-containing protein [Wolbachia]"
gene 45760..46749
/locus_tag="wEsol_00060"
CDS 45760..46749
/locus_tag="wEsol_00060"
/codon_start=1
/transl_table=11

```

```

/pfam="PhyH Pfam-B_17183 2OG-FeII_Oxy_3 2OG-FeII_Oxy_5"
/fullproduct="qcoverage 100 , hcoverage 100 , similarity
100 , identity 100 , evalue 1.26e-239 , alnlength 329 ,
Bacteria , Proteobacteria , WP_006280067.1 MULTISPECIES:
phytanoyl-CoA dioxygenase family protein [Wolbachia]"
/translation="MKALQKNGFFIIKNLVPLELITQSLNDIISKISKLSQELGVSTS
DYLNCTGRWGTSSQVTRIVSQVLDKIIKNYLEKSLQCQILQKKNVICKTADLIDAVP
FHQDISYSFNDPYHFSVWLALNNVNKTSGALQVIEDSHNWKIQPLVDFWHPYFLDQYS
DNRENYKIKSLPISAGDAIVFDSRLWHGSDKNIDAKDRFAYVTRWVVKDKSLPCVPKP
QPSVFGILNCGALTEFILREYLSLFRRQESIKTKNMEELIKSWLAFITDTTNNISEVN
TAEAKRDLYKLLILNQASALHDAGDISGKIYKNLWFSLLVFLNKKVNVVELAL"
/product="phytanoyl-CoA dioxygenase family protein"
/besthit="qcoverage 100 , hcoverage 100 , similarity 100
, identity 100 , evalue 1.26e-239 , alnlength 329 ,
Bacteria , Proteobacteria , WP_006280067.1 MULTISPECIES:
phytanoyl-CoA dioxygenase family protein [Wolbachia]"
gene 46750..48555
/locus_tag="wEsol_00061"
CDS 46750..48555
/locus_tag="wEsol_00061"
/codon_start=1
/transl_table=11
/fullproduct="qcoverage 100 , hcoverage 100 , similarity
99.7 , identity 99.3 , evalue 0.0 , alnlength 601 ,
Bacteria , Proteobacteria , WP_174516732.1 MULTISPECIES:
ABC transporter ATP-binding protein/permease
[unclassified Wolbachia]"
/cog="MdlB COG1132 567 ABC-type multidrug transport
system, ATPase and permease components"
/pfam="ABC_membrane ABC_tran SMC_N Pfam-B_16450
Pfam-B_6534 Pfam-B_5913"
/tigr="TIGR02204 MsaA_rel 576 ABC transporter,
permease/ATP-binding protein"
/product="ABC transporter ATP-binding protein/permease"
/translation="MNKSRVGSFKYIILVFILNLSKFKNLVLMFLVALVVAVDLSFR
KYLVKNILDTAVKYQEGNVIENTLLLPVSAYVCMALLITTAFRFYGYFVDIRMFTSMRQ
KIADMSFYRLLQQDHSYYQNNLSGSLVYKVSNLMDSVIELIRLLIDCFFSYSIALILA
IYTLSLVNIKFAIATFIWVNIFILISVFSFRVLTGLADDHSHKQSSQVIAGIADSILNV
ISVRLFSRQAHERHKFFQVCKKKTISERKLQWAYFWLWFIYGYSFDILQAVNLYFLIH
DYQLNKIAIGDIALVLGINISIIIEFLNHLTRNLTQFSTHFGKVSDALPILTTVPEIQD
KENAKKLNLLSGRITFNNVSFSYEGQKSLFQDFSVTINPCEKVGLVGYSGGGKSTFIN
LIIRLFDVKKGNIQIDNQVVSEVTQSSLRQQISVIPQEPLLFHDTILANIIYGKLQST
IEEIIIRAAKLAGIYDFIMTLPDQYETVVGEKGIKLSGGERQRIIIARAFLKNAPILFL
DEPTSQLDSITEKTIQMSLFKLMENKTTITIAHRISTLLHMDRILVFDKGKIVQDGKH
SELVCKKGLYKELWDAQIGCLNIKKENGKNYRPEK"
/besthit="qcoverage 100 , hcoverage 100 , similarity 99.7
, identity 99.3 , evalue 0.0 , alnlength 601 , Bacteria ,
Proteobacteria , WP_174516732.1 MULTISPECIES: ABC
transporter ATP-binding protein/permease [unclassified
Wolbachia]"
gene 48527..49576
/locus_tag="wEsol_00062"
CDS 48527..49576
/locus_tag="wEsol_00062"
/codon_start=1
/transl_table=11
/fullproduct="qcoverage 100 , hcoverage 100 , similarity
100 , identity 99.7 , evalue 7.09e-247 , alnlength 349 ,
Bacteria , Proteobacteria , WP_174516731.1 threonine
aldolase family protein [Wolbachia endosymbiont of

```

```

Cardiocondyla obscurior]"
/cog="GLY1 COG2008 342 Threonine aldolase"
/pfam="Beta_elim_lyase DegT_DnrJ_EryC1 Aminotran_1_2
Aminotran_5 Sela"
/product="threonine aldolase family protein"
/translation="MEKTIDLRSDTTTLQSSNVMHAISSAIVGDFAYGEDKSCNNLSE
YCKQLFKVEEALFVTSGMLANRLAIASQTSPGDELITHYNYHVNFFDSAGNAKVNISIV
FNCIRNNTGILDIDEVEYAINSKPRYKIFAQVSLVSIENSINGFNGKIYPFKKQVELY
NFLKAHNISLHLDGARIFNAHAETNVALADYAKYVDTMSFSFTKGLGAPFGSMLMGKR
EIIEKAKKLQVWLGSYHQIGYCANAAYVLQNNISRLKEDNKLAKLFADKIKEIPHV
KLILPYPETNIVSFSIKELNVTNEFFLSKCQAYGLLLFPWLESHIRAVVHLGIEEADI
INAAEIIKEVVLNLV"
/besthit="qcoverage 100 , hcoverage 100 , similarity 100
, identity 99.7 , evalue 7.09e-247 , alnlength 349 ,
Bacteria , Proteobacteria , WP_174516731.1 threonine
aldolase family protein [Wolbachia endosymbiont of
Cardiocondyla obscurior]"
gene 49573..50616
/locus_tag="wEsol_00063"
CDS 49573..50616
/locus_tag="wEsol_00063"
/codon_start=1
/transl_table=11
/fullproduct="qcoverage 100 , hcoverage 100 , similarity
100 , identity 100 , evalue 4.65e-251 , alnlength 347 ,
Bacteria , Proteobacteria , WP_174516730.1 MULTISPECIES:
threonine aldolase family protein [unclassified
Wolbachia]"
/cog="GLY1 COG2008 342 Threonine aldolase"
/pfam="Beta_elim_lyase"
/product="threonine aldolase family protein"
/translation="MRVKIDFFSDSNTNPSSEMREVMKAKVGNAAACEDPTVNELIE
TTCKILGKPAGIFLISGTMCNVIAVKVHIQRP GDYLLLD ETSHP L I V Q S G L I A A Q A H A
T P L P I K G T R G I F T G E Q I V E F I T R P S L R N V P K V G L V S V E Q T T N F G G G A V W P L E Y I Q E I S
S L C K K N D V S S H L D G A R L F N A C A Y A K I S P K E Y A N Y F D S V F I D F S K G L G A P M G A V L A G S E
E F I E K A W Y Y K F Q I G G M H Q A G I I S A A C L Y A L N N N M N S L I E D H K K M Q H L I K G L S S I D Q V
I I N I D L Y K T N I A Y F S L R T D C I S A Q E L I N I L M T N Y G I R M A N I R G K I R V I T H R D I S C E D I
N T T I S T I R K I L N R"
/besthit="qcoverage 100 , hcoverage 100 , similarity 100
, identity 100 , evalue 4.65e-251 , alnlength 347 ,
Bacteria , Proteobacteria , WP_174516730.1 MULTISPECIES:
threonine aldolase family protein [unclassified
Wolbachia]"
gene 50912..51124
/locus_tag="wEsol_00064"
CDS 50912..51124
/locus_tag="wEsol_00064"
/codon_start=1
/transl_table=11
/product="hypothetical protein"
/translation="MDSKNNPLFMFGLCN IATGLLTIGIALSYNNLTLLLLTLILLAW
TQGLGWPAITKFMVTNSSIASSW"
/cog="UhpC COG2271 448 Sugar phosphate permease"
/besthit="qcoverage 100 , hcoverage 20.8955223880597 ,
similarity 98.6 , identity 98.6 , evalue 2.52e-37 ,
alnlength 70 , Bacteria , Proteobacteria , CCE77508.1
putative Major facilitator family transporter [Wolbachia
pipientis wAlbB]"
gene 51128..51919
/locus_tag="wEsol_00065"

```

CDS 51128..51919  
 /locus\_tag="wEsol\_00065"  
 /codon\_start=1  
 /transl\_table=11  
 /product="hypothetical protein"  
 /pfam="MFS\_1 MFS\_1 Sugar\_tr"  
 /translation="MSASQQLGSCITLIVLPSIIKIYDAKSAFLYSGLLCLLFGIYII  
 LKAYYEESANFTTYYKVQKSQIGIKVKSSIWFLCCATFCAYIIKMGIFFWFPIILKNK  
 LQISLVQSSLITGVYDLGGILGTLITGRISDMYFFQNRSLLASLYMLGIALTFIAMNF  
 GQNIILMNLGAILSGFFIFGVQVLTGVMAVEIAPQNNVCAIVSLTGLFGYIASSIFSC  
 VLLGVLVKHCGNSIMFLFFSICSVVALVCFSILSSKDLKKLSKAV"  
 /cog="UhpC COG2271 448 Sugar phosphate permease"  
 /besthit="qcoverage 100 , hcoverage 69.0288713910761 ,  
 similarity 99.2 , identity 98.1 , evalue 9.49e-168 ,  
 alnlength 263 , Bacteria , Proteobacteria , OAM03919.1  
 MFS transporter [Wolbachia endosymbiont of Dactylopius  
 coccus]"

gene complement(51937..53268)  
 /locus\_tag="wEsol\_00066"

CDS complement(51937..53268)  
 /locus\_tag="wEsol\_00066"  
 /codon\_start=1  
 /transl\_table=11  
 /fullproduct="qcoverage 100 , hcoverage 100 , similarity  
 98.0 , identity 96.6 , evalue 1.05e-307 , alnlength 443 ,  
 Bacteria , Proteobacteria , CCE77509.1 UDP-glucose  
 6-dehydrogenase [Wolbachia pipientis wAlbB]"  
 /cog="Ugd COG1004 414 Predicted UDP-glucose  
 6-dehydrogenase"  
 /pfam="UDPG\_MGDP\_dh\_N NAD\_binding\_2 3HCDH\_N Pyr\_redox  
 AlaDh\_PNT\_C ApbA UDPG\_MGDP\_dh UDPG\_MGDP\_dh\_C"  
 /tigr="TIGR03026 NDP-sugDHase 413 nucleotide sugar  
 dehydrogenase"  
 /product="UDP-glucose 6-dehydrogenase"  
 /translation="MLSYIFKVMHITIIGVGYVGLVSCAMLSEQGHKVCIDINTEKI  
 ELLKSGKIPLYEPGLADYLENNIKSQIRIFFDSYFQINPNTVEVVFITVDTPSDSLGN  
 NLKNVYNVAVSEVSEVINQDCLIVIKSTIPPGATKNIYNYLSNKGYNFDLGVNPEFLKQ  
 GSAVSDFLYPDRIIIGVKTKRARVKLEAIYRSFTDRNIPLIVTDTVTAEMIKYASNAF  
 LATKVAFINEMAGLCELLGADIELLANSMDHRIGKEFLKAGPGFGGSCFPKDLSAL  
 IRLAEDHNVKLQILNSVKESNYNHITNIAKKVEYVLNGVQNKKIAIWGLTFKSGTDDV  
 RNSPAIDIAQLLVNNKAKITAYDPMGMDNARQVLKDIEYADNAIGAARDAEALLLLE  
 WKEFKNQDFASLKSIMAAPNVFDFRNLLDSELLRLRYGYHVYSLGKKSIIYKV"  
 /besthit="qcoverage 100 , hcoverage 100 , similarity 98.0  
 , identity 96.6 , evalue 1.05e-307 , alnlength 443 ,  
 Bacteria , Proteobacteria , CCE77509.1 UDP-glucose  
 6-dehydrogenase [Wolbachia pipientis wAlbB]"

gene complement(53284..>54148)  
 /locus\_tag="wEsol\_00067"

CDS complement(53284..>54148)  
 /locus\_tag="wEsol\_00067"  
 /codon\_start=1  
 /transl\_table=11  
 /fullproduct="qcoverage 100.348432055749 , hcoverage  
 95.6810631229236 , similarity 98.3 , identity 97.2 ,  
 evalue 1.07e-179 , alnlength 288 , Bacteria ,  
 Proteobacteria , WP\_010082202.1 MULTISPECIES: DMT family  
 transporter [Wolbachia]"  
 /cog="RhaT COG0697 292 Permeases of the drug/metabolite  
 transporter (DMT) superfamily"  
 /pfam="EamA EmrE EamA"

```

/tigr="TIGR00950 2A78 264 carboxylate/amino acid/amine
transporter"
/product="DMT family transporter"
/translation="IWFILSLFSSVANDTISKYLSLHLQSFVIFFRFLFSTITLVPF
MLYYGREAFKTSQISIQITRGVLLFVGITLWTYGLAIFPIVTATIISFSIPLFVILLA
IPLLNENIIWQRWSVTVIGFVGIAITTKAYSEDFNPKILIFIVSTLIFAILDILNKKL
AIKESVISMLFYALTTFSTVPLLFYWHLPSSLLELILLILGISSNLILFFMLKAF
ALTDATALAPYRYIELIISAIVAYVIFNELPDKSALYGTLLILIPSTLFIAYSEGKAIK
KNNVTTKVYNC"
/besthit="qcoverage 100.348432055749 , hcoverage
95.6810631229236 , similarity 98.3 , identity 97.2 ,
evalue 1.07e-179 , alnlength 288 , Bacteria ,
Proteobacteria , WP_010082202.1 MULTISPECIES: DMT family
transporter [Wolbachia]"
gene 8459..8540
/locus_tag="wEsol_tRNA-01"
tRNA 8459..8540
/locus_tag="wEsol_tRNA-01"
/gene="tRNA-Leu"
/intronpos="0..0"
/program="tRNAscan-SE"
/cove_score="62.7"
/evidence=predicted
/type="Leu"
/anticodon=TAG
/product="tRNA-Leu (TAG)"

```

# ORIGIN

```

1  gctatggtta  ctgaccctca  ttttttgtgg  catatTTTTT  ctttcaaggt  taaatggcta
61  ttttataatg  aattttgtca  gtagccacca  gatttttttca  gttgctatgc  aacaaagcca
121  tcccagtgtc  aagcactgga  atgacatcac  agggggcactg  gaattttttgt  ttcaatattt
181  gtacattagc  catgcatctg  aacagatact  gtaaattagc  tatattacat  tagcccatca
241  gatgagttgt  aatgggttata  attgtctgat  aagtgatctc  taacatcgtg  acctaactca
301  ttggcatcag  gcttaacttc  gtgatctaac  tcattagcat  cgagcttaaa  caaagaagga
361  ttatcatcag  attgttgatt  agactctttc  tctttcgacc  caaataacca  tgaaaagagt
421  gatgagatag  aatcaataat  ggatttaatt  gctgaaaaaa  tattggataa  gaaattactg
481  ggttgctgag  tatcctcttc  ggctgattct  gggttcaggct  cttttcctgc  tgtgtcatcc
541  acatcttggt  caggcttact  tctgcttatg  agtgtcttat  ctaaccattt  ggacatattc
601  ttgtctggat  tatgaaaata  cattttctct  atgtccttgt  tttcatcaac  aaaaattact
661  acagttgcat  tctgacttaa  tgacccttca  tttaatctat  aacgttcact  aacgagcgat
721  tcatgagagt  tcttttatatc  ttgaatcaat  cgaagttttt  cttcttctac  taaaaggtaa
781  cctctgtggt  gtatagcata  attggtccct  ttgtacttaa  attgcaacat  tcctgtaacc
841  tctgtgtagt  catcaccttt  ttgttcttct  tctggctctg  gattcgtgcg  gttttcattt
901  acctcttctt  cagacttact  tctgcttata  agtgtcttat  ctagctgttt  gaatatattt
961  ttgtcggagt  ttcgaaaata  cattcgactt  atctccttat  tttcatcaac  gtgaatcgat
1021  aaaactgtat  tctcattccc  caatccatca  cattcactaa  cgagcgattc  atgagagttc
1081  ttaatgtctt  tgataaattg  aaatttttct  tcttctgaaa  agtacttgca  tcttacgtta
1141  taagtgggtg  ctttgtattt  aaaactaaat  atccatccat  ggtcttcata  ttcatttagt
1201  ccagaattct  tgacacgttg  tataatttga  aatttttcat  cttctgaaag  gtccttgagg
1261  tatatactac  cagttgtatc  tttatattta  aatttaaaca  tccatccatg  gtcttcatat
1321  tcatctagtc  cagaactctt  gacacgttgt  ataatttgaa  atttctcttc  ttctgaaagg
1381  tttaggcggg  atacactacc  agttgtacct  atgtatttaa  aaataaaaact  ccatccatcg
1441  tatttatatt  catctacacc  catctgcttg  caaatagctt  tataattttt  ttcttctact
1501  tctcgtccaa  caacatttgc  tatgagttca  gtatccagaa  tactcaaagt  ttggactggt
1561  gccgatgggt  aaaaacacaa  ttgaaatatg  tggcctagct  catgacccag  aacaaaatcc
1621  atggcacttt  gcttatatgt  cagagtattc  tgacaatctg  ttactcctcg  tgtaatatat
1681  cctggactac  catcttcatc  tatgccgaga  agattgttat  actttgtata  atcgcttcta
1741  ttattgaaaa  tgtaaaccgt  tatattttta  cttatgctac  tatctttgaa  gcaaaaacttt
1801  tctttaaatg  cctcataggc  agttttaatg  tctgtttcta  tttggttttg  ttcctgctca
1861  gataagttgt  cgtattttat  agtacaattt  atatacccg  atttaacggg  aaagctgtta
1921  gacaaaacat  catgtatat  tgtggaaaaa  taattgaact  gctttgactc  ggcttcttta

```

|      |             |             |            |             |              |             |
|------|-------------|-------------|------------|-------------|--------------|-------------|
| 1981 | tacaattgat  | gcccataat   | atcactagaa | tacttttggt  | gttttaggtac  | tttggcaatt  |
| 2041 | aagttttt    | tactatcaaa  | aaaagaaata | tcagaattac  | caatcctaaa   | atcctttata  |
| 2101 | gattgcccgc  | aagtgccatc  | atttgcacaa | tcatgattat  | ctttcttatt   | aaaccatgcg  |
| 2161 | ttggtgtatt  | tttccat     | gatacctcac | taccaaacct  | tactatatta   | ttatcttgggt |
| 2221 | aaaaatcata  | ataattcggt  | aacttgtatt | ttaaactctgt | atcaaagtgtg  | cttttctcgt  |
| 2281 | aaggtatcaa  | ttgtgaagta  | attaacttta | tttgtttaaa  | attttgctaa   | aatagctctt  |
| 2341 | tttatactat  | gttttatata  | gctaaactga | cttagattta  | ctgacaat     | gaaaaacaaa  |
| 2401 | aattcgtcat  | tccgctacta  | tagtattttc | taaaacgaat  | gataaacgctc  | taaaatggta  |
| 2461 | ttaccaacta  | aaaggtgtaa  | gtttgtacat | tgatgcatta  | gaggtctgag   | gcgacttttg  |
| 2521 | atggtgtgcc  | aacaatgctc  | tatcggattt | agatcttact  | attaccacaca  | aatataaatg  |
| 2581 | tttgttgc    | agttctta    | ggcataactt | ttgcttgaaa  | taactgttta   | tatggtgcaa  |
| 2641 | tttacagctt  | ttagttgcta  | aaattataac | tcttagttta  | ataat        | tctaataagc  |
| 2701 | tttcagggtta | ataaaattaa  | attat      | taaatacaat  | attatgtttt   | tatttgtggg  |
| 2761 | taatagtaag  | gcttaaagca  | aatgtagta  | cgaacggtag  | gtggatctaa   | aagatcgaat  |
| 2821 | tacaatcctg  | tatacagcat  | tttgcattat | tgtttgatta  | tatttatagg   | tacaaaaatg  |
| 2881 | gctagaataa  | ttttcatggg  | agtagatgtt | tccaaggaag  | cattggacat   | ctcaattaat  |
| 2941 | ggcaagcata  | agcgcatagc  | aaacgtgagt | gatgctatat  | ctaagtttat   | agaaacaaat  |
| 3001 | atagtcgatt  | tacccatcaa  | gttatatgta | aactggtggc  | tatgaaaagc   | tcattataaa  |
| 3061 | attgttgcaa  | gataactgtc  | cataaagctc | acccgaatcg  | ggtatatgca   | tttgccaaag  |
| 3121 | cttgcaatca  | ttttgcaaaa  | actgacaagt | tagatgctaa  | attactggaa   | aaatacgctg  |
| 3181 | aatttgtcag  | taaagacggt  | gaagtaaaag | gatgtataat  | ttcacaaaag   | caagaggaat  |
| 3241 | taaaggagct  | gggggcagtt  | gagcgtaatt | taaatgatgc  | aattcatgca   | aacaagtgtc  |
| 3301 | gcctgcaaag  | tgcgacggga  | aaagctagag | aatacataga  | aagacagata   | gggtttgctg  |
| 3361 | aaaaacaatt  | gaaagaaatt  | aggcaagaca | tagaagacac  | aatagattct   | gaccctgaat  |
| 3421 | tgaaaggaaa  | aatgagctt   | ttaatcagct | ataaagggtat | tggtcaaaga   | cggcgagcgt  |
| 3481 | tctactgaca  | gaggtgcctg  | agcttggtag | attagagaat  | agagaaattg   | catgcttagt  |
| 3541 | tggagttgca  | cctaaaacta  | gtgaaagtgg | aagaaaagt   | ggcaaagctc   | aatcaaagg   |
| 3601 | aggcaggttt  | tatgcaagga  | aagcactata | catgtcagct  | cttgttgcta   | tgcgccacaa  |
| 3661 | cagaaaaatg  | aaagcgttt   | atcagcgttt | ggttgattct  | ggcaaagctg   | ctaaggttgc  |
| 3721 | attagttgct  | gtcatgagaa  | aaattatcgt | ttgtttaaat  | gccatgataa   | aaaataacaa  |
| 3781 | cttttatctt  | gactcttaag  | acggtagatg | acagaccatt  | gattgtatgg   | gttccatctg  |
| 3841 | ttatatataa  | tctttttgaa  | tacgaagaaa | actgatgaat  | gagtatgata   | ttacggttat  |
| 3901 | aggtagcgggt | cctgggtggtt | atatagcggc | aattagggcg  | gcacagcttg   | ggtttaaaac  |
| 3961 | tgcaattgtg  | gaaaaagaaa  | aaaatttagg | cggatatatgc | ttaaattggg   | gatgtatacc  |
| 4021 | aacaaaatca  | ctgcttagag  | catctgaggt | ttataggcta  | ataaaaagat   | caaaagagtt  |
| 4081 | tggatatagaa | gtaaagggag  | cgaattttga | tatacaatca  | atagtgaat    | actcaagaaa  |
| 4141 | cgttgttgat  | aaattgtcaa  | gcggtgttg  | atatttgatg  | aaaaaaaaata  | atatcaaagt  |
| 4201 | tcatcaagggt | tttgggtaaac | ttgcaggcaa | tggtactata  | aaagtcgtta   | gcgataagga  |
| 4261 | agaacaagaa  | attgtttcca  | agcatatcat | tttagcaaca  | ggcgtgaggg   | cacggaatct  |
| 4321 | gcctggaata  | gaggcagatg  | gagattta   | atggaatgcg  | cagcacgcta   | tgactccaga  |
| 4381 | gagattacca  | aatcgctac   | taattatagg | gtctggtgca  | attggaatag   | aatttgcaag  |
| 4441 | tttttatagt  | actttggggg  | ttgatgtaac | aatcatagag  | ataaagagca   | ctattttg    |
| 4501 | gctggaggat  | aaggacattt  | cagatttagc | acaagaaata  | ttcacaaaac   | aggggataaa  |
| 4561 | aatatataca  | aacagtagcg  | taaaagctct | tactaaaagt  | aaagactctg   | ctcaagtgtc  |
| 4621 | actaagtagt  | ggtgaaagca  | aagaatttga | taaggtgatt  | gttgcggttg   | gaattcaagc  |
| 4681 | aatatttgaa  | aatataggtt  | tagaaaatac | aaaaattaaa  | ttaagccctt   | ctggctttat  |
| 4741 | tgaaacgaat  | gaatggtatg  | aaactagtga | atcaaagtgtg | tatgcaatag   | gtgatgtagc  |
| 4801 | tggcccacca  | tgtttagcac  | ataaagcgag | ccatgaagcc  | gtgatctgca   | ttgaaaagat  |
| 4861 | tgctggtaaa  | aatgctcatg  | cgttaaaaaa | agaatgcata  | ccaaattgca   | cttattctca  |
| 4921 | tccacaaaata | gcgagcatcg  | gccttactga | ggaacaggca  | ataaaaagggtg | ggtatgat    |
| 4981 | aaaaatagga  | aaatttca    | ctaattttta | tggtaaagtct | gttgcaactca  | gtgaaactga  |
| 5041 | agggttagtg  | aaaacgatta  | tagataaaaa | aaccggagaa  | attctgggta   | gccacatgat  |
| 5101 | aggtgcagaa  | gtaacggagt  | taattagcaa | ttttgctctt  | gcaaagcaac   | tagaaggaac  |
| 5161 | agacttcgac  | ataaaatcta  | cgatttttcc | tcatccaacc  | atttcagaga   | tgatacatga  |
| 5221 | atcagtgc    | gctgcagatg  | ttaa       | gaactaacgt  | tccatcg      | tagagttgtc  |
| 5281 | aatgtc      | gtagtagttt  | gattaggcac | tttagtttca  | atagattgat   | taccaccagc  |
| 5341 | atcagaat    | tgtaactctt  | ctttcaatcc | cttagctgct  | tctttaa      | caagctttgc  |
| 5401 | ctttggatga  | agatcttctg  | ggccttttcc | tttagtatcc  | aaaccttgtt   | gtagattagt  |
| 5461 | gcttttcatt  | ttattatgct  | gctcgtgctc | aggtaggtca  | acgaccgaat   | tgaaaagaat  |
| 5521 | ttttattata  | tttttttagca | gttctaaaaa | acctccgctt  | ctgccttctc   | tttgttcttg  |

|      |             |             |             |              |              |             |
|------|-------------|-------------|-------------|--------------|--------------|-------------|
| 5581 | aggttttat   | ttctcattag  | gttctttttt  | actattactt   | ttaggcattt   | ttaaactcaac |
| 5641 | tatcataacg  | cttaataaaa  | ttctacgtgc  | aaattgttaa   | ataacagtta   | acaatctagg  |
| 5701 | at ttattatt | tacagatgga  | tattat tttt | gcaacaggtg   | gcacaggtgg   | gcata tcttt |
| 5761 | ccggccatag  | ctttagcaaa  | agcactaaa   | acacaaggat   | acaattgcat   | attattcact  |
| 5821 | gataaaaaaa  | caaataaaaa  | taccgacata  | gaaagctaca   | ccttaccatt   | acgtagacca  |
| 5881 | agcagcaaca  | aattttaagtt | tttccttttc  | ttgatataca   | gctctatggt   | agcactgtat  |
| 5941 | caagtaagaa  | aattaaaacc  | aaaatcggtc  | attgggtttg   | gtagctatgc   | ttcttttcca  |
| 6001 | actcttcttg  | cagcaagagt  | tctttctata  | cctataaatt   | tacatgaaca   | aaacacagtt  |
| 6061 | ttagggagag  | taaatagatt  | ctttttcaag  | agtgcaaaat   | taattgcaac   | cagctttccg  |
| 6121 | gagactaaat  | atgcagaggg  | caataaatgt  | at tttttacag | gaaat tttgt  | tgatataaaa  |
| 6181 | gcacagagcc  | attctagcac  | tgagaaaatc  | ctaaatata    | tgggtcatagc  | aggcagccaa  |
| 6241 | ggtgcaaatt  | tttttgatga  | tgtagtaagc  | agagtaattt   | gtgatttacc   | tattaaaatg  |
| 6301 | aaaaagaaaa  | ttagagtgc   | gcagcaatgt  | acgaagaaaa   | atgtaaacaa   | ggtcaaaagt  |
| 6361 | ctatacaaaa  | gtgaaaagat  | cgattgtgaa  | ttgagtgaat   | tttttgatga   | tatggagaat  |
| 6421 | agactggcca  | atgctcactt  | ggtaattagc  | agagcaggag   | caacttcaat   | agcagagatc  |
| 6481 | actcttgcta  | ggcgttctgc  | tatatata    | ccttaccctt   | actcaaaaga   | taatcaccaa  |
| 6541 | ttttataacg  | caaaatata   | tgaagactcg  | agagcagcta   | taatagttga   | gcagaatagt  |
| 6601 | gaagcaaaaa  | aaaatctaac  | agaggtacta  | tttgatctat   | taaataattc   | tcaaaaattg  |
| 6661 | cgtgatatga  | ccaatagtag  | agaaaaaaca  | gggataaaga   | atgggactac   | tgagtttgtt  |
| 6721 | aaggtgattg  | ttcacaggtt  | tagttgatgg  | ctgcttgctt   | tttcttcaaa   | cacgtcccaa  |
| 6781 | agatcctttt  | ctagcgatat  | attatacaat  | ttattgatata  | aaactactcc   | cgtgggtgaa  |
| 6841 | gttgtgttaa  | tttcgagcag  | gaagtcactt  | ataatatcaa   | taccaacaaa   | tattagccct  |
| 6901 | cttttcttta  | attcaggacc  | aattttgtta  | catatttcat   | tgtttctatc   | gttcatttga  |
| 6961 | gcgggctcaa  | aacttgctcc  | aagtcgcagt  | ttgtttctga   | tctctccact   | gatttttggg  |
| 7021 | attcgtttca  | ttacaccaat  | tggttgccca  | taaagtagca   | atattccttt   | atctttatct  |
| 7081 | atgtttttac  | aaaatgattg  | tgcaatcaca  | gggcattcgt   | at ttttgctat | catgagatcc  |
| 7141 | actactactt  | gaatactatt  | ctcatcttgt  | attcttatca   | catcgtttcc   | tccataacta  |
| 7201 | tacaatggct  | tcagaataat  | atcttgatag  | ttgtagtaga   | aatctcta     | cattgatata  |
| 7261 | ttttcagtaa  | tcaaagttgg  | cgggaattagc | tctggaaata   | atgaagttat   | caatttttca  |
| 7321 | ggacaatttc  | ttatttctgt  | tggattgtta  | attaccaatg   | cgctggtttt   | ttctaagata  |
| 7381 | tatgtttgtg  | taatataacg  | catatcaaag  | ggtggatcct   | gtctgataaa   | tatgatgtcc  |
| 7441 | atttcattca  | agttgattgc  | tacatcctct  | ttagagataa   | aactaaaatc   | atcaacgctg  |
| 7501 | acttttctgag | ccagagcaat  | tggatggttt  | agcttttagtg  | ctaaattggt   | aggagcatag  |
| 7561 | acaaaaactt  | cgtgcttcct  | cctttgtgct  | tcctttatta   | gcacgaatgt   | agtgtcagtt  |
| 7621 | tcaaaattta  | tattttcatc  | catctgaaag  | gcaatttttca  | tttatgttct   | ctacctattg  |
| 7681 | tcacaactgt  | acaaatgtta  | taatttgaaa  | gcgattttttg  | cctaattggcg  | taacttactg  |
| 7741 | tacctgtatc  | gtacataaact | tacaacttgt  | tttactccct   | ttacttttct   | tgcaattgct  |
| 7801 | attacagctt  | ttaattccgc  | tttatttttg  | gctataacca   | tcaaataaac   | aactctatca  |
| 7861 | accgtattaa  | cgctataaatt | aattgactta  | atattttctt   | ttcccaggag   | tcttgttcct  |
| 7921 | atttccgctg  | ttatcatgcc  | atctacagtg  | gtgtctagca   | tgggaagccat  | ttgaattgggt |
| 7981 | attactctta  | tttcattttat | cacttcttta  | at tttctttt  | gctgccaaagc  | tattttttct  |
| 8041 | gctgtaagtt  | gttttttcagg | agtgtcaaca  | cttccaatga   | gcaataactct  | tccttcactt  |
| 8101 | actttaacct  | ttatggatga  | aaatagccca  | tgtttttaaga  | gccccttatt   | aattctgatg  |
| 8161 | accatagtcg  | tatcatcaat  | gatattttcc  | aaggatttgt   | cctgcattgt   | tattgctgtt  |
| 8221 | gctgtcgctg  | tagccaccac  | accacctatt  | ataaggggtg   | tgcaaccact   | ttgtgtaatc  |
| 8281 | aaaaaaattg  | cgagtaagaa  | gcttgttatt  | aatctcatta   | ttgattttca   | tggtttagag  |
| 8341 | ctttcattaa  | gaaatgttaa  | taagcttttt  | tgattgtgta   | aataccataa   | attaagtaag  |
| 8401 | actttaaacc  | ttgaatattt  | ttaatggaa   | acctataata   | gggtactgaa   | aatttcttgc  |
| 8461 | ggatatggcg  | gaattggtag  | acgtgccagg  | tttaggtcct   | ggtgagcttg   | ctcgtggggg  |
| 8521 | ttcaagtccc  | tctatccgca  | ctttaaagtc  | atgtaactta   | ggtttttaagg  | gaaaatttat  |
| 8581 | aatcactaaa  | tacacttttg  | tttgtgtaaa  | aacctgttct   | taaggattgt   | gtttaactta  |
| 8641 | aattctggta  | aaatgactct  | attaagatat  | gaattaaaat   | gttaataaat   | gaattatgat  |
| 8701 | gtctaataat  | atacctcaaa  | atacagtcga  | agtaagtagc   | gtatatacct   | acaaagagct  |
| 8761 | tagtatagat  | aaactaaagt  | atgagtatga  | aatcacagtt   | ggtagtgatt   | atataaaaca  |
| 8821 | aaaggtaaat  | tccaggttgc  | aagagatagc  | agaaaaatgca  | aaatcacctg   | gatttagggc  |
| 8881 | tggaaagatg  | ccctatgacc  | ttgttggtgc  | aaattataaa   | aacgaggctt   | tggaaatagt  |
| 8941 | gataaataat  | acaattgatt  | attgctcaag  | tgattttgatg  | aaaaaaattg   | aagtcaagtc  |
| 9001 | tcacattttat | cctaaggttg  | atgtttatct  | attaccagat   | ctgggcaaa    | aaaatgagga  |
| 9061 | aggcaatttt  | gtataacaagc | tatcttttga  | gtcgatgcct   | gaagtaccga   | tgatagatct  |
| 9121 | tgacaaaata  | aacttaaaaga | aaattgaagc  | aaagattgaa   | gaggaagata   | taaaagaatt  |

|       |            |            |             |             |             |             |
|-------|------------|------------|-------------|-------------|-------------|-------------|
| 9181  | tattgattct | atcaaaacaa | agttccccaa  | ttttgcctct  | gttgatgatg  | cttcttatca  |
| 9241  | agcgaaagat | ggggataaat | tgataattga  | ttttgaaggg  | cggattagga  | ataagctctt  |
| 9301  | tcaaggtgga | agtagcaaag | attttgccgt  | taatttaggg  | tctggcacat  | ttattaatgg  |
| 9361  | ttttgaagat | caattaactg | gtatgaaaaa  | gggagaaaca  | aagaacttta  | agttgaaatt  |
| 9421  | tcctgaaaat | taccaagcca | tttcccttgc  | aggacaggaa  | gctgattttt  | ctgtgcgagt  |
| 9481  | taatgagatt | caaattgcca | aagattttga  | aaatgatgat  | gaaatagcta  | agagtattgg  |
| 9541  | gtttaaagat | tattctttgc | taataaatca  | tgcaaaaaaa  | atgattgggtg | atcagtgcac  |
| 9601  | cgaaatgaga | aatctcttaa | ttaaaaagga  | gctgtttgat  | tatttggatg  | ctaattatag  |
| 9661  | ttttgattta | cccacagaca | tagtaaaaca  | ggagcaacaa  | agaatggaag  | gagaattggg  |
| 9721  | tgctcaaaat | gattctcgta | aagaagctga  | aaaacgtgta  | aagcttgcta  | tgttatttat  |
| 9781  | gaaatttagt | gcagaacata | aaatatcatt  | aactcaaaat  | gatgttttga  | gtgttattgt  |
| 9841  | aaatcaatat | gtcagtaaag | atgtgcaatt  | tgacagagta  | attaagcatt  | ttgaatcaaa  |
| 9901  | taaacaattt | caagaattag | ttagagggca  | agcgcttgag  | tataaagtga  | cagattatat  |
| 9961  | aatagaaaaa | gttagtaaag | aagagcagat  | tgtttctgtg  | aaagaattaa  | aggaattatt  |
| 10021 | tgataatatt | taataggaaa | aggtatgact  | cttataccaa  | ttgtagttag  | acaaactagt  |
| 10081 | cgcggtgagc | gcgcttatga | catatattca  | agactagtga  | aagaaagaat  | aatttttgta  |
| 10141 | acaggtccta | ttgaagacaa | tatggccagt  | gtaatagtag  | cacagctttt  | atttttagaa  |
| 10201 | tcggaaaatc | ccgataaaga | catttgtagt  | tacatcaact  | caccaggtgg  | tggtgtaact  |
| 10261 | gctggtttgt | cgatctacga | tacaatgcag  | tatataaacc  | cagacgtttc  | aactttatgt  |
| 10321 | ataggtcaag | ctgcgtctat | gggttcttta  | ttgcttgtag  | ctggtacaaa  | aggtaagcgc  |
| 10381 | tactctctac | ctcattcaag | aattatgata  | catcagccat  | ctgggtggtta | tcatggtcaa  |
| 10441 | gcaactgata | tagaaataca | tgctaataga  | attttgtag   | ttaagaaaaa  | actaaatcaa  |
| 10501 | atztatgaaa | aacatactgg | aaattcactg  | aagaaaattg  | aaggaatgat  | ggaaagagat  |
| 10561 | aaattcatgg | atcctgaaga | agcaaggaaa  | attggcttaa  | ttgacagggg  | gatagctgag  |
| 10621 | cgtacagata | ttgaaattga | aaatattaaa  | gttaaacaaa  | aggtgggtta  | atggataaca  |
| 10681 | ataatgattt | acactactgt | tctttttgca  | acaaggcgca  | agatgaagta  | gataaattga  |
| 10741 | ttactaactc | ttcggatggt | ttaaagggtg  | ttatttgtaa  | tgagtgcata  | gaattatccc  |
| 10801 | ataaagcaat | aagtcaaaag | aaagatagat  | cttttaattc  | agatcgtata  | tctgatatga  |
| 10861 | agctattact | aaagaaacct | gaggatataa  | aaaactttct  | cagcaagcat  | gttgtaggtc  |
| 10921 | aagaacacgc | gcaacacggt | ttatctgtag  | ctatgtataa  | ccattgtcaa  | tccatggtac  |
| 10981 | aatttcatgc | tataagtgat | attgaaatcg  | agaagtcaaa  | tataatgctt  | attggtccca  |
| 11041 | ctggttctgg | taagactttg | ctagccaaaa  | cacttgctaa  | agtttcagat  | gtgccatttg  |
| 11101 | ctatggctga | tgcgacaact | ttaactgagg  | cagggttatgt | gggtgatgat  | gtagaaagcg  |
| 11161 | tgttgtcgcg | tttattacaa | gctgcaaatt  | atgacgttgt  | aaaagcacag  | cgtggtatag  |
| 11221 | tgtttataga | tgaaatagac | aagattacaa  | gaaaatctga  | aagcacttca  | ataacccgtg  |
| 11281 | acgtttcagg | tgaaggggtc | cagcaagctc  | tgcttaagat  | tatggagggt  | acagttgctt  |
| 11341 | atgttccgcc | acaaggaggg | cgaaaacacc  | cgcaacaaga  | gtttatacaa  | gtggatacta  |
| 11401 | gtaacatact | gtttatttgt | ggaggagctt  | ttgaaggcct  | cgataaaaatt | attgaagcga  |
| 11461 | gaaaaaagg  | aacgtcagtt | ggctttggag  | cagatataag  | tcagtctaaa  | gagcaaaaaga |
| 11521 | aaaagaatgc | tttacatgat | gttcaacctg  | aagatttaatt | caaattcggg  | ttaataaccg  |
| 11581 | aatttgtagg | gcgggttcca | ataactgctg  | ttttagatga  | gctggatcat  | gaagatttaa  |
| 11641 | tacatgtggt | gacagagcca | aggaatgcac  | taataaaaaca | gtacaaagca  | ttgcttgctg  |
| 11701 | ttagcaaagt | aaaccttgag | ttttcagatg  | aagcaatatc  | agctattgct  | aaaaaggcta  |
| 11761 | taagctacaa | aacaggtgca | agaatgttac  | gtgctatctt  | ggagtcactt  | ttgcttgaca  |
| 11821 | ttatgtatac | atctggaaac | ggaggctttg  | aaggtagcac  | tatagtaatc  | actaagaaaa  |
| 11881 | tggtagaatt | aggaaaagca | acggttaatc  | ataataacaa  | tggcaatggt  | ataacggtta  |
| 11941 | atgattaatt | tgaggcatat | attatgaaca  | ttgaacgtgc  | tgtaagctct  | agttttactg  |
| 12001 | cattgccagt | attaccttta | agagatgtag  | taatttttcc  | aaatataatg  | gtgcctttat  |
| 12061 | tcataggcag | agaaaaatct | gttaatgcac  | tagagtatgc  | aataagtagt  | agtaatcacc  |
| 12121 | aaaatgagat | ttttcttgta | gcacagaaaag | atggctctgt  | tgataatcca  | gagcctgaag  |
| 12181 | atctttatga | agtaggtgtg | ttagcaagca  | ttgtacaacc  | gttaataaaa  | ttacctgaca  |
| 12241 | atgcagtaaa | agttataatc | cgggggataa  | gaaggggaag  | agttgtagaa  | tatattagct  |
| 12301 | ctcatacttt | attacaagcc | agggtagagt  | tagacaatca  | ttataaagaa  | gatgaagaca  |
| 12361 | atattgattt | agaagcttta | aggcggctctg | ttgtagacgc  | gttcgatagc  | tggtgtaagc  |
| 12421 | taaacaagaa | aaatcaaccc | gaggttgcca  | ttaactccat  | tgatcaaatc  | aaagaagttg  |
| 12481 | atcaacttgt | agacacggta | gcttcacatt  | taaatataaa  | agtatcagat  | aaacaaagta  |
| 12541 | tacttgaggc | ttatgaccca | gaagagcggt  | taaaaaaagc  | ttttgctttt  | attgagagag  |
| 12601 | aatgagtat  | tttgaacgca | caaaaccgtt  | tatataagac  | aattaaatcg  | caagttgaaa  |
| 12661 | gcactcagaa | agtttactac | cttaacgagc  | aattgaaagc  | tatacagaaa  | gaattaggcg  |
| 12721 | aatttgagaa | tggtgatgaa | gggaatatac  | tcaatgaatt  | tgaaaaaaag  | ataaatgaaa  |

|       |             |             |             |             |             |             |
|-------|-------------|-------------|-------------|-------------|-------------|-------------|
| 12781 | caaagctttc  | tcaggaagca  | agagagaaag  | ctataactga  | tttgaagaga  | tacaagaaaa  |
| 12841 | tgaatcccat  | ttctcctgaa  | gctacagtta  | tatctagtta  | cttgcattgg  | ttgcttgagt  |
| 12901 | tgccatgggg  | aaagtacaaa  | gatgcaaaaa  | ttaacttaaa  | tgcagctaag  | aaaatccttag |
| 12961 | atgaaaatca  | ttatggcata  | gagaaagtaa  | aagatagaat  | aatagaattt  | ttagcgggat  |
| 13021 | taaaaagagt  | aaaagagata  | aaaggctcta  | tacttttgctt | agttggaccg  | ccaggtggtg  |
| 13081 | gtaaaacttc  | tttagctaag  | tctatggcaa  | gagcagtagg  | aagagatfff  | gttcgcatag  |
| 13141 | ctcttggtgg  | tgtgcgtgat  | gagtcctgaga | tacgagggca  | taggaaaact  | tatatgggct  |
| 13201 | caatgcctgg  | taaaatcatt  | caacacatga  | aaaaagctaa  | ttcatgcaac  | ccgctttttc  |
| 13261 | tgcttgatga  | aatagataag  | atgggttctg  | attcgcgtgg  | cgatcctgca  | tctgcattac  |
| 13321 | ttgaggtfff  | agatactgag  | cacaataaac  | actttacgga  | tcattacttg  | gaagttgagt  |
| 13381 | ttgatctttc  | aagtgtaatg  | tttgtagcta  | cggcaaacag  | cttaaattta  | ccacatcctt  |
| 13441 | tgctgtatag  | gatggaaaatt | atacaattgt  | ccgggtatac  | tgaagatgaa  | aaaatcagta  |
| 13501 | ttgctacaca  | ccaccttatt  | ccgaagttaa  | agaaggagca  | tggtttgat   | cagaaggaat  |
| 13561 | gggacataac  | taatgaggcg  | ttatacagat  | tgatacgttt  | atatacacgt  | gaaagtgggtg |
| 13621 | tgcggtgat   | ggaaagggag  | cttgcaaagc  | tcatgagaaa  | ggcagttaaa  | gaaatattga  |
| 13681 | ctgataaaaa  | taagaaaata  | tccgtagggg  | ttgacaatff  | acaagattat  | ttaggggtac  |
| 13741 | gtaaatatac  | ctttggcatt  | gcggaaaatg  | agagtttagt  | aggaatagta  | actgggctcg  |
| 13801 | cctatactga  | aacagggtgt  | gatattttga  | tgatagaatc  | agtcctaatt  | ccgggcaagg  |
| 13861 | gagaaataaa  | atacacagga  | aagcttggag  | aggttatgca  | agaatctata  | aaagctgcgt  |
| 13921 | atagttatat  | tcgatcaaatt | tgtttgtttt  | ttggtataaa  | gcccgaaaaa  | ttccaaaata  |
| 13981 | atgatataca  | tttcatgtat  | cctgaggggtg | cagtaccaa   | agatggccct  | tctgctggcg  |
| 14041 | gcgcggtatg  | tacgtctatt  | gtttctctta  | tgacgaatat  | accagttaac  | aaaaatggtg  |
| 14101 | ctatgacagg  | cgaagtgaca  | ttgcgtggta  | gagttttagc  | tattgggggc  | ttaagagaaa  |
| 14161 | aattgcttgc  | agcgctcaga  | ggatcaatca  | aaactgtgat  | tataccaagt  | gaaaatgaga  |
| 14221 | aagatatgca  | agagattccg  | gcaagcatca  | aagaggggat  | caacgtagtt  | tttgctaaga  |
| 14281 | atattgatga  | agttatgaaa  | gttgctttta  | tgcacccctac | tactccaatt  | gatggtgatg  |
| 14341 | ataatcaaaa  | tagtgtgcct  | tcctctatag  | aaagtaaaga  | tgatactfff  | cctatgtcgg  |
| 14401 | aaacattgaa  | gcattagatt  | aaaaaaatat  | tatcaatctc  | catttctctt  | ttatctggca  |
| 14461 | agaatccacc  | aacttgtgca  | tcccataagg  | atatgacttg  | ctttgttggt  | atgtcattca  |
| 14521 | tattttttac  | ttattctatc  | tcccagttta  | attcaagtag  | atgatataatt | ataatagtcc  |
| 14581 | ttttcatgga  | aaccttttct  | ggtggattgc  | tttctagaaa  | aacattgggtc | aagggtgcaa  |
| 14641 | ctgtggttta  | taataatata  | aattatatca  | tagttgattt  | gcgttttatca | gagctgaggt  |
| 14701 | atgtttttatt | ttacaaaattt | tttgccattt  | ttactgttcc  | tatttctttt  | tgtaggaagc  |
| 14761 | ggcatatatt  | ttactgttct  | tggcgtgtca  | aatgcttttt  | atcagttatc  | tccactagta  |
| 14821 | gccattgttc  | ctgccatagc  | tctgggttgg  | gttttatata  | agggcaatac  | tgaagaaaaa  |
| 14881 | atgtatgcct  | ttctagatgg  | ggtaagagat  | cgtaaatatta | tcactatgtg  | catcatffff  |
| 14941 | ttacttgcag  | gtgcattcag  | tgaagtaact  | aaagcaatcg  | gtagtgtctga | tgccacagtt  |
| 15001 | aatttggctc  | tttcattttat | accaacacaa  | tttttactca  | taggattatt  | ttttgtagca  |
| 15061 | gctttcatct  | ccactgctat  | tggtacatca  | atggggcacca | ttgcaacaat  | tgctcctatt  |
| 15121 | gcagttgaac  | tgacacaagc  | tgggatttct  | ccttccttag  | gagttgcaac  | cgttgtagga  |
| 15181 | ggagcaatgt  | ttggcgacaa  | tttatctatt  | atctctgata  | ctacaattgc  | atctgtgatg  |
| 15241 | tctcaaaagg  | ctgatataaa  | gaaaaaatta  | aaactgaatg  | caaaagtggc  | actaattgct  |
| 15301 | tctatattca  | caataattat  | attatfffft  | agctcaagca  | atagtgtctg  | tatttcagtt  |
| 15361 | aaggagtatt  | ctttattgct  | tgtgactcct  | tacataatac  | ttatattgct  | tgcaaaacttt |
| 15421 | ggaataaatg  | tattttacggc | attggttttta | agcataactt  | ttgctggaat  | cattggattt  |
| 15481 | ataaataaca  | acaattatgg  | tttattgttt  | ttaagccaaa  | acatcactaa  | ggggtttatg  |
| 15541 | agtatgcatg  | aaattatgct  | actgtcattg  | atgggttggcg | ggcttttcagg | actggtaggt  |
| 15601 | aaaaattcta  | aggagcttgc  | agataaaactt | tcatcttggg  | ttatgatata  | acgtggtgga  |
| 15661 | caaaaaactg  | cgcaattatt  | tattgcaaaa  | atagtcagca  | tatttgatat  | tttacttgca  |
| 15721 | aataacacca  | tcgctataat  | ttttagtgggt | gaaattgcta  | gagatattgc  | taagaaatat  |
| 15781 | gaaataccgc  | ctcactatag  | tgtagcatgg  | ctaggcatat  | tttcttgtgt  | atttcaagga  |
| 15841 | ttaataccgt  | atggcgctca  | attgcttttg  | gctagcacta  | ttgctggagt  | ttcacctttg  |
| 15901 | gcagtcgtgc  | cacacgtata  | ctattgctat  | gttttaggta  | ttattgcagt  | gttatataatt |
| 15961 | gtattgaaca  | aaattgagaa  | aaaagattgt  | gcttaatata  | caagacaacg  | ctccgctctg  |
| 16021 | tagaaaatgg  | atgttcttgg  | cagtatgtgc  | tcttgcttgc  | tctgggttac  | tgtcaataat  |
| 16081 | tgttatffff  | ctacgattgc  | cttttatctc  | ctctcttggt  | ccttctgcac  | aatataffff  |
| 16141 | tgataatgcg  | ctggtaatac  | acgtgaactt  | gtcaatffff  | gtgtggatgt  | gctctataat  |
| 16201 | atctctgctc  | tttatcataa  | acctacaaaa  | taccaatagt  | tggtttaact  | tttcatgggt  |
| 16261 | tctatcaacc  | ctttcgatgc  | tgtctatggt  | tatatccgca  | ttcgttccaa  | acactgaagt  |
| 16321 | tatcaaaagt  | aattatatct  | ccgtgttaca  | aaacaaaatta | tttttgtttg  | gactcagttt  |

|       |              |             |              |             |             |               |
|-------|--------------|-------------|--------------|-------------|-------------|---------------|
| 16381 | at ttattgccc | agtatattag  | t aaatacaat  | gctagcatac  | acatcaaaaa  | aagagggtttc   |
| 16441 | at ttctctct  | gttggggcaaa | ttgggctagt   | tattatactt  | gtatcgtcat  | ttcttttgctt   |
| 16501 | tg ttttagca  | tataataata  | tgcctccagg   | tctatatcac  | tcagataata  | at ttat tttta |
| 16561 | cgaatatctc   | ttttggggag  | gcggacattt   | attgcagttt  | gcttttactc  | aaggaatggt    |
| 16621 | tttagtctat   | ttaatgatca  | gtgatgttag   | tttagcttca  | agcaataaaa  | ttactat ttt   |
| 16681 | accactat t   | ataaacacga  | ttttagctgt   | aggcgcaccg  | tttgtatatt  | ttgtttatcc    |
| 16741 | agttgatagt   | gccaagttaa  | tacagttttt   | tacttggcat  | atgaggattg  | ctggagcagt    |
| 16801 | tttgccgtgc   | tttttgataa  | tattagtgtg   | ctgcaacatc  | agaactttta  | ttaatgataa    |
| 16861 | aagcaactat   | ttattacatt  | cattttttgt   | gttcacttat  | ggagatgtgc  | tcggagtgtt    |
| 16921 | gactattgaa   | ggaaatgtca  | ccattcccgc   | tcattatcac  | ggttctgtag  | ttgggatcac    |
| 16981 | tatagctttt   | atgaatttca  | tttattggct   | gttaccctaa  | ttaaacttta  | aagagataaa    |
| 17041 | aggttccatg   | gtaagattac  | agatttatgc   | ctacagtata  | gggcattttc  | tccatatcac    |
| 17101 | tggtcttggt   | tggtcttggt  | gatatgggtg   | tttaagggaag | gttgcagatc  | tgccaagtat    |
| 17161 | ttcatcaatg   | ttagcacgca  | cgtgcttcat   | tataggtggc  | gctatatcag  | ttgttggtgg    |
| 17221 | aatgttggtc   | gtaataattg  | tgctttttaca  | tctgttaaaa  | ggcaaagcgc  | gtaccaactg    |
| 17281 | acccatagaa   | acaaaaaaaa  | cttccttgac   | aaactccgcc  | agccccctta  | tcataaaact    |
| 17341 | gaagctat t   | at ttatcttc | tctgtacaga   | ttaaatgaca  | aaaaaactca  | cgtatctggc    |
| 17401 | gtcccatggt   | taattttttg  | cactatgtgc   | accttatgtc  | tttataaaat  | ttctaggttt    |
| 17461 | ttaccttaata  | taagctgaaa  | tgcgcttata   | aagcatttaa  | aacatcaaaa  | aacgccgatt    |
| 17521 | taaaaaatgg   | atagtgaata  | actagctacc   | ctagggtttc  | ttttgccttt  | ttttctgttt    |
| 17581 | agtaaatttc   | ttaatgttta  | taatttagat   | tagttgcggc  | ttaaaagcaa  | ctaaatcgcg    |
| 17641 | gttattaagc   | gtttagaata  | aaaaaacgcc   | atacttgaaa  | gtataatgta  | agtaattagc    |
| 17701 | caaccacggg   | gcttcttttg  | cctttttttt   | catttggtaa  | at tttttaat | at ttatacgg   |
| 17761 | aaggtagcgc   | gtgacgctgg  | aacccccaaa   | aaaggatgat  | gtcatcccag  | tgctcctttt    |
| 17821 | tttgtcatcc   | gagtagctga  | cactgtcctc   | ctttgtcatc  | ccagtgccca  | aacattggga    |
| 17881 | tccagcattt   | cacgcaatcc  | catcaagaac   | gttgtat ttt | acataacact  | tttatgctta    |
| 17941 | ccaacttaat   | aaaattcctg  | gatcccagtg   | ggctttgttg  | catcgctact  | tatgaaaggc    |
| 18001 | taactataat   | taggattata  | agcaacttat   | tgaaaatctt  | gttttttttg  | caatcaatct    |
| 18061 | gatcaaattt   | aagaatagta  | acttgttatt   | tatattaata  | aattttaattc | tattgaaaat    |
| 18121 | agctaaagca   | ttgaaattct  | tgaatttttag  | ccggattagt  | gagtggtagt  | gaaatttctt    |
| 18181 | ttactcaaat   | ttaggtattc  | actgaccggt   | cttgttataa  | ataccagaat  | aataagctac    |
| 18241 | tgatattctc   | cacctttttt  | atcttttaatc  | catcatagct  | agcgatgcaa  | caaagccatc    |
| 18301 | atagtcaagg   | cactggaatg  | acaaaaaaaaag | gaggcactgg  | aacgacaaaag | tggagtgtct    |
| 18361 | gcttctgtca   | tcctatgata  | gctaaaaaga   | cctgggtcacg | cgctggaatg  | acaccgaagg    |
| 18421 | ggctactgcc   | ctcttggtatg | gagaccagtg   | tcagctactt  | agatgatacc  | ttttttctac    |
| 18481 | ttagtttagg   | ttatgcagaa  | gtctaataca   | attatagaac  | aagcttaaaa  | attctggtaa    |
| 18541 | agtagtttta   | tttacaaga   | aagaatatgc   | tacttgaaat  | tgaaaagcgc  | agcataacaa    |
| 18601 | atgcattgtg   | gaagttgcaa  | gaagcagatc   | aaaggcaaat  | cttaactctt  | acacagagat    |
| 18661 | ttgagttacc   | agaaatatta  | gcaagaatat   | tggttactcg  | tggtgttaac  | atagaaaatg    |
| 18721 | caagcgactt   | cttatatcca  | ctaatacagat  | cgctattacc  | agatcccttt  | caccttcttg    |
| 18781 | atatggataa   | agctgtttct  | cgtataatac   | gggcaataaa  | aaatgatgaa  | aaccttgcaa    |
| 18841 | tatttggtga   | ctatgatgtt  | gatgggtgcaa  | cgctcgtcagc | attgattaac  | aggtacctga    |
| 18901 | gagcaatcga   | tatacactct  | ataatctaca   | ttccagatcg  | tgttgatgag  | ggttatggat    |
| 18961 | taaacacaga   | tgctttatta  | caacttaaaa   | agaatggaat  | tgatttatgt  | at ttcggttg   |
| 19021 | attgtgggtac  | gcttgcatat  | caaccaatag   | aagatgcaaa  | ggctttttgg  | cttgatatta    |
| 19081 | tagttgttga   | ccatcacctt  | ggtacggaaa   | aattaccaag  | cgccgtagca  | gttgtgaatc    |
| 19141 | caaaccgcct   | tgatgagagc  | tctccttata   | ataacctagc  | agcagttgga  | gtgtcatttc    |
| 19201 | tgctaattgt   | tgctcttaat  | aaaagcctac   | gtgagcaagg  | at tttttacc | aacaaaaaag    |
| 19261 | aaccagattt   | at ttgatctg | ttggatttgg   | ttgccctggg  | aactgtctgt  | gatgttatgc    |
| 19321 | agatcacagg   | cctcaataga  | gcacttgtct   | cacaaggatt  | aaaagttatg  | tcaacaagaa    |
| 19381 | aaaacgttgg   | cttgcgtgtt  | ttatttgatg   | ctttgggaat  | ccttgaaaaa  | ccaagtgttt    |
| 19441 | cgcggttggg   | gttttagcatt | ggaccgtgca   | taaatgctgg  | aggaagaatt  | ggagaagcat    |
| 19501 | cgcttggtgc   | aagggttgctt | tccaccgatg   | atgatgaaga  | ggcacattca  | atcgcgctaa    |
| 19561 | aattaataga   | tttgaataat  | gcaagaaaag   | tgttagaaaa  | tgaggctctc  | ttggaagcta    |
| 19621 | cagcacaagc   | ggaaaagtct  | gccaatcag    | gtgcgaattt  | tataatgata  | agtggcaatt    |
| 19681 | ggcaccaggg   | aataattggg  | ataattgcat   | caaggctaaa  | ggagcagttt  | cacttgccaa    |
| 19741 | cagtagtgat   | atctttaaat  | aatggaatag   | gaaaagcaag  | ctgtagatca  | at tttgggag   |
| 19801 | ttgatatcgg   | tgctgcagtc  | ctttccgcaa   | agttttataaa | tttgattatt  | gaaggtgggtg   |
| 19861 | gccatagtat   | ggcggcagga  | ttttcaatta   | aagaagacaa  | aataaatgat  | ttgcatgatt    |
| 19921 | tttttactga   | aagatttttca | aactctataa   | atgagaaaaac | tttaaaagct  | gatagtatag    |

|       |             |             |             |             |             |            |
|-------|-------------|-------------|-------------|-------------|-------------|------------|
| 19981 | taactgctaa  | agcaataaat  | ttgtctttat  | ggaatcaatt  | gcaacgcttg  | ggaccatttg |
| 20041 | gagttggaaa  | tcctgaacca  | aggttttatta | tccaaggagc  | aaagataaga  | aagcctgaag |
| 20101 | ttataggagt  | tgaccatata  | aaatgtttta  | ttgctgatga  | taatgttatg  | gtaagagcta |
| 20161 | ttgcattttcg | ttctgcaa    | actcatcttg  | gctctgctat  | catgcagggg  | aatgttaaag |
| 20221 | ctatttttggg | taaaatctct  | atgaattact  | ggaatggcaa  | tgaatttgta  | caatttttaa |
| 20281 | tagaagatgt  | attgaccatt  | agttgagtgt  | atctgttcag  | cagagtggca  | aaataggtag |
| 20341 | acaagataaa  | ccaaaaaatc  | gagaaaaagt  | gagtttacia  | caactgggtg  | catgaaatta |
| 20401 | tctgacactg  | atttccatcc  | aagaggggtg  | catcccagtg  | ctcctaaatg  | tcatcccagt |
| 20461 | gcgtgacact  | gggatgacac  | cctacttaac  | cgtcataccg  | cgattcattc  | gcggtatctc |
| 20521 | ttagccgcta  | acaagtagcg  | ggatgacgag  | cttatcgta   | tgccactgcg  | aaccgtcata |
| 20581 | ccgcgattca  | ttcgcggtat  | ctctagatcc  | cgctaacaag  | cagcgggatg  | acggctgtcg |
| 20641 | cttagccata  | aacgttaaaa  | aattttacca  | acgaaaaaaa  | aggcaaaaaga | agccccgtgg |
| 20701 | ttattatccg  | ctttaaaata  | ttggcgtttt  | ttatgtttta  | aacgcttgac  | aagcgagatt |
| 20761 | cagccgcttt  | taattgcaac  | taacttacgc  | tgcaaatgtt  | taagaaat    | actaagcaga |
| 20821 | aaaaaagaca  | aagaatcccc  | gagttagcta  | gtcttttact  | atctctgtcg  | agtattggca |
| 20881 | ttttttgatg  | tcttgtaacg  | ctttataagc  | gcgttcagct  | tatttagata  | aaaatctaga |
| 20941 | tgtagatgaa  | gttttgtaaa  | gacatacagt  | atctatatac  | tgcaaaaaat  | tgaacataag |
| 21001 | acgccgatac  | attaagtaat  | ccttaccttt  | taatctgcag  | attggcgaaa  | gcaaatacaa |
| 21061 | tagcttcact  | atcatgataa  | gggcgctggc  | gaagggtgtc  | aagtaagttt  | tttcgtttct |
| 21121 | atatgcgcta  | ccttaagact  | tcaacgtctt  | aacgcaccta  | actccatctg  | catataaatt |
| 21181 | tgcatggctc  | tttccagtat  | taagcaatgc  | aaatccaatg  | ttgtctacac  | tagagcgtag |
| 21241 | ttcccctatt  | tcctcattgt  | tttcatttgt  | cacttttagtg | ccaatatctg  | gaagtgcgtt |
| 21301 | atccccctca  | acaaggtaaa  | gttttcttct  | gaatat      | ttctgtctca  | ttcgatttac |
| 21361 | aacttcctga  | cctatataac  | accccttatt  | aaagcttata  | ccgtttacct  | tatcgattaa |
| 21421 | aaattgcagc  | ggaaacgatg  | aattctgcac  | catatctttc  | gctccatctg  | gaacgagatt |
| 21481 | ttgaattcta  | actttttcat  | actgagtaaa  | atcccccaacc | ggctctttta  | tttcatcttt |
| 21541 | atgtatgatc  | ctcattccta  | gcagcttggtg | ccttggatct  | tgaaaaataa  | cttgtgactt |
| 21601 | accactacac  | tcgcgcaact  | tagtattaaa  | caaaactcca  | accttatata  | gtgcgctaac |
| 21661 | gtctttaatc  | ttcactctca  | agtaagtttt  | aagcaaatcc  | agtttctcga  | ttatttgctg |
| 21721 | caagtgcagt  | ttttcgcact  | ctaagagggg  | gtatttacca  | tattcaataa  | gaaaaaaatc |
| 21781 | atatagatat  | tttccctgag  | ggctaagcaa  | taaagagtaa  | atggcttttt  | ggctatccaa |
| 21841 | cttattaata  | tcattgggtta | taataccctg  | cagaaaaatct | ctagtgtcag  | gccccatata |
| 21901 | cactatcaca  | ccacgactta  | aaaatgggtat | ataactcatg  | aaatctctat  | aaataaatct |
| 21961 | aaat        | atataacatt  | aggctctttt  | agaaactgct  | tttggcggtg  | atattttata |
| 22021 | atggcggtgca | tatttttacia | gctccagccc  | ttgaaatcta  | acttacgagt  | atataatata |
| 22081 | aaacttataa  | gttaatttgt  | tgatgaggaa  | aaacaaatgt  | caagtataag  | tttaaatgta |
| 22141 | ttagatgata  | gcgtgctgat  | caagcctatt  | agcgaagaaa  | agcaaggtgg  | aattgtgctt |
| 22201 | ccatcaagtg  | ctgaaaagaa  | acctactaaa  | ggtgaagtta  | tagcaattgg  | tgaaggttca |
| 22261 | cgcaattcaa  | gtggcgaaacg | cgtaacttta  | actgtgaaaag | ctgggtgataa | agtgttctat |
| 22321 | cgtcaatggg  | ctggtacaga  | aatagaacat  | aatgatgaaa  | agcttatcgt  | gatgaaagag |
| 22381 | tccgatatac  | ttgctgtcat  | taaatagcag  | tctttatttt  | actaaactta  | aacaaagcgc |
| 22441 | aacatgacgc  | attgtgaatg  | attttattat  | agttttctaa  | attttttatt  | aacaagaggt |
| 22501 | gataaaaaatg | actaatgtag  | tagtatcagg  | tgagcagttg  | caagaagcct  | ttcgtgaagt |
| 22561 | cgcagcaata  | gtagactcaa  | cgggtggcaat | aactgcggga  | cctagaggaa  | aaacagtagg |
| 22621 | gattaataag  | ccctatggag  | caccagaaat  | tacaaaagat  | ggttataagg  | tgatgaaggg |
| 22681 | tatcaagcct  | gaaaaacat   | taaacgctgt  | aatagcaagc  | atctttgcac  | aaagttgttc |
| 22741 | tcaatgtaac  | gataaagtgt  | gtgatggtac  | aacaacgtgc  | tcaataactaa | ctagcaacat |
| 22801 | gataatggaa  | gcttcaaaaat | caattgctgc  | tggaacgat   | cgtgttggtta | ttaaaaacgg |
| 22861 | aatacagaag  | gcaaaagatg  | taatattaaa  | ggaaattacg  | tcaatgtctc  | gtacaatttc |
| 22921 | tctagagaaa  | atagacgaag  | tggcacaagt  | tgcaataata  | tctgcaaatg  | gtgataagga |
| 22981 | tataggtaac  | agtattgctg  | attccgtgaa  | aaaagttgga  | aaagaggggtg | taataactgt |
| 23041 | tgaagagagt  | aaaggttcaa  | aagagttaga  | agttgagctg  | actactggca  | tgcaatttga |
| 23101 | tcgcggttat  | ctctctccgt  | attttattac  | aaataatgaa  | aaaatgatcg  | tggagcttga |
| 23161 | taatccttat  | ctattaatta  | cagagaaaaa  | attaaatatt  | attcaacctt  | tacttcctat |
| 23221 | tcttgaagct  | attgttaa    | ctggtaaac   | tttggttatt  | attgcagagg  | atatcgaagg |
| 23281 | tgaagcatta  | agcacttttag | ttatcaataa  | attgcgtggt  | ggtttaaaag  | ttgctgcagt |
| 23341 | aaaagctcca  | ggttttggtg  | acagaagaaa  | ggagatgctc  | gaagacatag  | caactttaac |
| 23401 | tgggtgctaag | tacgtcataa  | aagatgaact  | tggaaatcaag | atggaagatc  | tcacgcttga |
| 23461 | tgatcttggt  | acggcta     | atgttaaaat  | tactaaagat  | aataccacag  | ttgtcagcga |
| 23521 | aaatagcgat  | tctgacagtg  | tgaagctag   | aatcgagcag  | attaaatctc  | aaattgaaac |

|       |             |             |             |             |             |             |
|-------|-------------|-------------|-------------|-------------|-------------|-------------|
| 23581 | ttcaacttct  | gattatgata  | aagaaaagct  | aagagaacgt  | ttagcgaaat  | tatcaggtgg  |
| 23641 | cgttgctgtg  | ctcaaagttg  | gtggagcaac  | tgaagtggaa  | gttaaagaac  | gtagagatag  |
| 23701 | agtcgaagat  | gcgctgcatg  | caacaagagc  | tgcaattgaa  | gaaggtatag  | ttccaggtgg  |
| 23761 | tggggttgcg  | cttctttatg  | cttcactctgt | tctcgacaaa  | ttaaaaggtg  | caagtgcga   |
| 23821 | ggaacaaata  | ggcataaaca  | ttatcaagaa  | agttctcagt  | gctccaatta  | gaaggttagt  |
| 23881 | caaaaatgct  | ggtcttgaat  | ctgctgttat  | aattgactat  | ttgattaagc  | agaatgataa  |
| 23941 | agagcttata  | tacaacgttg  | aggctatgaa  | ttacgctaata | gcatttacag  | ctggtgtgat  |
| 24001 | tgatccagca  | aaagtgggtgc | gtattgcttt  | tgaacacagcg | gtatctgttg  | cgagtgtgct  |
| 24061 | gataactact  | gaatctatga  | tagttgatgt  | accaagcaaa  | gaaaatgctt  | catctcctat  |
| 24121 | gggtgcagga  | gaaatgagtg  | gcatgggtgg  | attctaagta  | gaatgaaacc  | gtggagcaat  |
| 24181 | tgctccacgg  | tagttccaaa  | aaatctcaca  | ttttactatt  | cgttaaaggt  | aatacgtttg  |
| 24241 | gtgcagaaat  | gcactactgt  | ttgcatccgt  | ttcatgcctt  | tatattgtgg  | ttgtctaata  |
| 24301 | acaaaaaggc  | agcataaaaag | aactataatc  | cctagtatat  | ttatactata  | gctaacacgt  |
| 24361 | cataccgcga  | ttcattccac  | aactgtacga  | acattacaat  | atggcacata  | gtaaacgatg  |
| 24421 | tcatgaaagt  | agctgacact  | ggaatgacac  | ccttttggat  | ggaaaccagt  | gtcacgcact  |
| 24481 | ggcatgacac  | ccatttggtc  | ctatagttgt  | cttttctcgt  | ctacccttatt | ttgccactct  |
| 24541 | gctgaacaga  | tacaattttac | aaccaccccc  | ctaccctttt  | tagttgttca  | gcaaatatag  |
| 24601 | agaggttaaa  | gggagtggta  | ttactttaaac | aactaaataa  | aaaaccaggt  | agatcattct  |
| 24661 | gaaattcttg  | catttttgtc  | cataattttg  | ttaaataact  | tcccttttgg  | tcatatcgaa  |
| 24721 | ccaaattttct | ttttcacacc  | accttttaag  | ccactttcgt  | tagtttttgt  | cataatgcga  |
| 24781 | tcaaacactc  | ccaataacct  | ctttaatagg  | tttgaggtta  | gcgaagagat  | aagatcaaca  |
| 24841 | gatacgttat  | tgtttttgtc  | atcaccactt  | gctttatagt  | ctattgaaac  | gattccccta  |
| 24901 | cttttccac   | cagtaagaag  | ttttccaatt  | ataggaattt  | ttaacaaaga  | tttattaatt  |
| 24961 | gaatatgctg  | gtattacttg  | tcctgcaacc  | tggaaatttat | aatttctaata | atcgagctta  |
| 25021 | ccaccagtgc  | taatacctaa  | ctccgcccct  | tcaagccaag  | attcttcaat  | ttcaatagtg  |
| 25081 | ccatctttgt  | atgaaaaag   | tgcattacat  | ttgtaaaagt  | atacaccttc  | attttttatg  |
| 25141 | gcatttacaa  | tgccaggcaa  | tgaagacatc  | gacaataaag  | tagtaagtag  | tggagcatct  |
| 25201 | ttgatgtaga  | aattgctaata | ggataacgta  | ccataatgtt  | ctccactttc  | tctctgagga  |
| 25261 | gagagataaa  | aagacaattt  | gccgttttta  | attgatttac  | taatgcctaa  | ggaacgcaaa  |
| 25321 | agcatacctg  | aattatccgc  | atatatttcg  | agccctattc  | cactgtattc  | tgctagtagt  |
| 25381 | ttgctgctat  | cttcagaaaa  | ctgccctgta  | aattgacttc  | cattgcaatt  | accttttagta |
| 25441 | caggttacat  | tcagcttagc  | attttttgata | acgatgcctt  | ctttcataat  | tacattgtca  |
| 25501 | acattcatac  | taatctctat  | atctttattt  | aatccattac  | tgttttttgcc | aagcaagcct  |
| 25561 | aaaatatcac  | ttaagttaata | ttcctcacca  | taaatagtta  | tggcattttt  | ctccttacct  |
| 25621 | gattcaattt  | ctataactaaa | atcattatca  | ggcaatttta  | agctactaga  | atttaaatat  |
| 25681 | aaattttccat | tttctactct  | tccgctgaat  | tttatatcta  | ggtcattttcc | tacaatgtct  |
| 25741 | aattttatcta | ctaacaattc  | acctgctcct  | tttaaccttg  | tagaaaacaa  | aatttttattg |
| 25801 | tgatcttcaa  | agcgattttt  | ccaccctaag  | tagcttgaat  | gtgattcaaa  | ttctgataaa  |
| 25861 | tctatatcac  | cattaacata  | ccccgtctta  | tcttgattta  | tcactgactc  | taaatttgca  |
| 25921 | ctgacatagc  | cactatcaaa  | attaaatatt  | tgagcgggta  | aatctccggg  | caaattccag  |
| 25981 | gcgaaacttt  | cattcctatt  | gctacttttc  | aggtcaaata  | atagctgtgt  | gttattcacc  |
| 26041 | ataccactac  | cattttaaatc | tataaagtca  | ctgccaaaac  | taagcttaata | atcatattta  |
| 26101 | ccaagacttg  | cattatagac  | ggccaaattg  | tcaatttcag  | aatgaaaatt  | tgctgagaag  |
| 26161 | tctacttttt  | tgtcatcagc  | atttagatta  | aaaatgcgaa  | aattaaatac  | ggattttggc  |
| 26221 | attccactta  | ctttatccct  | ttcaaccttc  | accacatcat  | ccagcttaaa  | tcttataggc  |
| 26281 | tcatataaac  | catacgcatc  | acttacagct  | ttgccattaa  | tggttagaac  | tgaatcttcc  |
| 26341 | ttatttagag  | atttcatttc  | aatatcacca  | ccattaacag  | tgaattctg   | aaacttagcg  |
| 26401 | ctatttacag  | taattttcaag | atcgttatc   | ttgatgatca  | aatcaccctt  | taattccttt  |
| 26461 | acttgctcaa  | aatcttcac   | aaatttttac  | ctaccgtttt  | ctatatcagc  | aacaattaca  |
| 26521 | atgtctgaca  | gatcgctcatc | aaccaaaattg | ttaatttttg  | cattgaaact  | tacaatggta  |
| 26581 | tttaaaacat  | ccccatcaat  | attatcacaa  | taccagcttt  | taaatttact  | atttactaca  |
| 26641 | ctatctggta  | tataagtaca  | taaatccttt  | gcagcaaact  | tactaatatt  | aattctaagc  |
| 26701 | aaagcatgac  | ttgtaccaaa  | gttcattttg  | cctatttaaag | agagatacgt  | gtcatttaac  |
| 26761 | ttaaaatgga  | agtttttttac | actaataatt  | ccattactat  | atgttaaatt  | tatatttaca  |
| 26821 | ttagttaagg  | ccaaattttt  | gttcaaataa  | ttttctgtat  | tcaatacgta  | tatatttcca  |
| 26881 | tctacaattt  | catccttttt  | attaattttc  | actgagaagc  | ttccttttgaa | tcctatatatt |
| 26941 | ttgtccaaat  | tgtagctttt  | aactaatgta  | gaaaactcgc  | ttaatagtcc  | caattttaga  |
| 27001 | tcataaaatg  | tcccgtacac  | atttagcaaa  | ttgttgcgat  | tttttatcgt  | aattgataaa  |
| 27061 | tcatccaaaa  | atcccttttt  | atctttttgta | ttcacatgaa  | tatctaaaaac | attaaaaatct |
| 27121 | tcccccttcc  | ctatatacaa  | tttatcaata  | aaaaattcat  | cttccgtgcc  | tttattaata  |

|       |             |             |             |             |             |             |
|-------|-------------|-------------|-------------|-------------|-------------|-------------|
| 27181 | gcgatgttag  | taaattcaat  | ttttgaatcc  | gcattttaagt | caaaaaaaaa  | ttcccttatt  |
| 27241 | gtttttaata  | gattttttgc  | actgctttct  | gtcatcttga  | aattcttccc  | tgtcatccca  |
| 27301 | gtatcttttt  | ttcctgtcat  | cccaatatct  | ttttttcctg  | tcatccaagt  | agcttgacta  |
| 27361 | cttgttttctt | tttttctaga  | ttccagcgtc  | acgcgctgga  | atgacaccga  | aggaaggcgg  |
| 27421 | ttattactta  | aataatgatt  | atccaaaagg  | tctaatagag  | tttgcggtatt | aacattaatt  |
| 27481 | tcttctctct  | tgatatatac  | acgcacatta  | tcagctaaaa  | cttgagaaaa  | ttttatgtta  |
| 27541 | ccttttaaata | aggaacttaa  | cttaaaatgt  | acaaaaagct  | caggaacttt  | tatagtaaaa  |
| 27601 | ttagggtttg  | ctattgccaa  | atctgtaatg  | actaaatacg  | gatcttttgc  | acctttctgc  |
| 27661 | caaacaactg  | agatattctc  | cacattaacg  | cttgagccaa  | caaataTTTT  | tgataTTTTa  |
| 27721 | tgtttaacat  | aaaaattaac  | ataattaata  | ttgatttcta  | aaggctttta  | aaaaataaag  |
| 27781 | aagcacaata  | tgaacaataa  | agctacggaa  | aataatacag  | taattttttt  | aagcattgat  |
| 27841 | tattgctttt  | cttgctaaac  | tatcagcctc  | ctcattatac  | ttatcgccac  | tgtgtgcttt  |
| 27901 | aaccctcttc  | caatcaattt  | cgtgttgtaa  | agcaacgttg  | tctaactctt  | tccacaattc  |
| 27961 | catatttttt  | actgattttt  | tattacttgt  | tttccaacca  | ttcatttttc  | acttattttat |
| 28021 | ccactctgtt  | atgccatgtt  | taacatagag  | actatccgta  | tataaattaa  | tattacaaga  |
| 28081 | aaatttcaat  | actttcagcc  | cattgatcac  | cgctgttaac  | tccattttat  | tgtttgtggg  |
| 28141 | attttcttct  | ctaccataaa  | tgtcttttct  | ataatcttga  | aataatatga  | tagctgcccc  |
| 28201 | tcctcccgc   | ccaggattac  | cagaacacgc  | cccatccgta  | tatattgtca  | cttccttttt  |
| 28261 | gctcatcttt  | aactgtaatg  | aattaataaa  | gtatatagtt  | gcttctatga  | aagcacaatt  |
| 28321 | tctaaaggta  | gtttaagctg  | caccttttaa  | ttttattata  | gaaacaaaaa  | aaagtgtgac  |
| 28381 | aacgagcatt  | acaaaaagga  | aaagtaaaaa  | atagttttta  | tgcttctgcc  | gttctttcat  |
| 28441 | aattaaaata  | aatcaataga  | acaaaaata   | atactggcga  | atagggaaaa  | tagataagaa  |
| 28501 | attgaataag  | aaaacatttt  | tttctgtgag  | ctgtggttct  | tgaatctgag  | aattgatata  |
| 28561 | gcgtaccaa   | taaaaacgca  | cccttcaaag  | gttgccatgc  | ttagataaag  | taaagccttt  |
| 28621 | ttcaagaata  | gagctggaag  | caagctagtt  | agcaccagca  | aaacactata  | aattaatata  |
| 28681 | tattttcttg  | ttttcttcgg  | accataaaca  | atattgaaca  | ttggaatcga  | tgcctttaca  |
| 28741 | tagtcttcag  | acttatttta  | agatagggcc  | caaaagtgtg  | gtggagtcca  | cataaagatt  |
| 28801 | actaaaaata  | aaatgaaact  | ttcccaactt  | acagaattag  | tcacagctgc  | ccagccaatc  |
| 28861 | attggaggaa  | aagcacctgc  | tgcaccaccg  | ataacgatat  | tctgcggtg   | gcgtcttttg  |
| 28921 | agccagatcg  | tatatacaaa  | aacgtaaaac  | aatatgctga  | ttgcaagtaa  | agcagcagaa  |
| 28981 | atatagttta  | ctgctattgc  | catgataaat  | actgataata  | ttccaagagt  | gataccaaat  |
| 29041 | tcaagcgcgc  | tttctgcaga  | aactctacct  | gagggtatag  | ggcggttttt  | tgtcctttcc  |
| 29101 | atgagcagat  | ctatatctct  | gtcataccac  | atatttatag  | cacctgcaga  | tcctgagcca  |
| 29161 | agagcaacac  | atataagaga  | tattaatgct  | agaaaaggat  | gcataccacc  | tgggtgcagca |
| 29221 | accataccgg  | caactgcagt  | aaataaccaca | agatacatta  | tccttgggctt | cagcaaacgc  |
| 29281 | caaaaatcca  | gtattgttga  | ttcaacattt  | agcaaaacac  | ttgtgtacat  | tctattttac  |
| 29341 | cactggtggc  | ttttcgaaaag | tatgaaaagg  | cggtggtgaa  | gataccgtcc  | attccaaggt  |
| 29401 | gtcacctttc  | caaggattat  | ctccagcttt  | cttgcccat   | ttgaagagat  | gtataactat  |
| 29461 | aaacacaaaa  | aacataactg  | aaacaaagga  | catatatgag  | ccaattgagg  | atatataatt  |
| 29521 | ccaagggata  | aacgcatcag  | gataatcagg  | tatacgtctt  | ggcataccag  | ctaataccaa  |
| 29581 | gaaatgttga  | ggtaaaaaag  | tgatattggt  | gctaataaaa  | gtaagccaaa  | agtggatttg  |
| 29641 | acctaagcgc  | tcatttatatt | gtttacccga  | cattttacca  | atccaataat  | aaaagccagc  |
| 29701 | aaaagctcca  | aataatgcag  | caagtgcac   | gacataatgg  | aagtgcagca  | caacataata  |
| 29761 | ggtgtcgtgc  | aagagcttat  | ctattccacc  | atgagaaaaga | attattcccc  | ttatgccacc  |
| 29821 | gccacaacac  | atgaaaataa  | aacctagtgc  | aaatagcata  | ggggtcttaa  | actcaattgc  |
| 29881 | tccacccac   | atagttgcaa  | tccagctaaa  | gactttttaca | ccagttataa  | caccgataaa  |
| 29941 | aattgtggta  | gtgctaaaaa  | atgcagcagc  | gtcagcacta  | agcccaacag  | tgaacatatg  |
| 30001 | gtgagcccaa  | accataaagc  | caaatactgc  | tatacctatc  | attgcataaa  | ccatccctat  |
| 30061 | gtaaccaa    | acaggtctgt  | gagaaaaagt  | tgatacaacc  | tgacttatga  | tgccaaatgc  |
| 30121 | aggaaaaata  | attacgtaaa  | cttctggatg  | acaaaaaac   | caaaatagat  | gttgaaataa  |
| 30181 | cacaggatcg  | ccgccaccgg  | caggatcaaa  | aaaggaagta  | ccaatattgc  | gatcagtaag  |
| 30241 | aagcatagtt  | atagcaccgg  | caagcactgg  | taaggcaaca  | atcaacataa  | atgctgttaa  |
| 30301 | caagacagac  | caaacaaaca  | gtggcatctt  | agttaatgac  | atgccttttg  | cgcgcatgtt  |
| 30361 | aatatagta   | actataaagt  | tgatcgcccc  | aacaattgac  | gacataccag  | caacgtggag  |
| 30421 | tgcaagtata  | gcaatgtcaa  | ctcctgcact  | tggatgggac  | attacctgtg  | ataaaggtgg  |
| 30481 | atataaagtc  | caacctgtac  | ctggaccttc  | accaataaac  | actgagagaa  | tgagcaaaat  |
| 30541 | aaaagatgac  | actaataacc  | agaaactcaa  | attattcata  | cgaggaaaac  | ccatatctgg  |
| 30601 | tgcgccaatc  | atgagaggta  | caaaccagtt  | accaaactct  | cccatgaggg  | ctggcattat  |
| 30661 | cataaaaaac  | accattatca  | acgcatgccc  | tgtaaccatt  | acgttatata  | attgatagtt  |
| 30721 | attgttaagt  | atattaatgt  | gcatttagctg | agtgcgaata  | atcaccgata  | ataatccacc  |

|       |             |             |              |             |             |             |
|-------|-------------|-------------|--------------|-------------|-------------|-------------|
| 30781 | aataattcca  | gctaatatgg  | aaaaaataat   | gtacagtgtc  | cctatatctt  | tatgattggg  |
| 30841 | ggaaaacaac  | caacgcttta  | tgcccttttg   | tacgtcactc  | atatctatac  | tccaaattta  |
| 30901 | actcactaat  | tttctatttt  | caatccactt   | attaaaatct  | tctttgctta  | ctgcttcaac  |
| 30961 | aacaattggc  | ataaatccat  | ggccttgacc   | acacaattcg  | tagcactgcc  | cataataaac  |
| 31021 | accaggcttt  | ttgatattaa  | accacgcctc   | attcagccta  | cctgggtatcg | catcaatttt  |
| 31081 | tacaccaaaa  | gctgggtactc | cccagctatg   | tataacatct  | cctgctgtaa  | cttgtaaacg  |
| 31141 | aacgtttagca | ttaacgggta  | aaacgatgtt   | gttatcaaca  | gagaacagct  | ttaaatctcc  |
| 31201 | ttcgataaag  | tcttcttttc  | ccttaatatata | actatcaaat  | gacacacctt  | gatattctgg  |
| 31261 | atattggtaa  | ctccaataacc | attgatggcc   | aataactttc  | agtgttatat  | cagctttcgg  |
| 31321 | tatttcttcc  | tgtagcttca  | gtaatttagc   | gttttcaaag  | gctaataatac | caacaatgat  |
| 31381 | agttgggtata | acaaacccaaa | taattttctaa  | aggaacacta  | tgggtagtftt | tacttatgtt  |
| 31441 | tgttactttg  | cttttacgaa  | agcgaacgc    | tatataagca  | agcagcgccc  | acacaaaaag  |
| 31501 | cattattgta  | accatcacaa  | gcatacacaaa  | cgaatgtgac  | ctaactacag  | cctccattac  |
| 31561 | ttcagttgca  | ggagcaggaa  | atccaaattg   | ccaggaagta  | ggagcagagg  | caacagatat  |
| 31621 | atgtgagtaa  | aataattatca | atagtgcaaa   | taacttcacc  | atatcttttg  | tttgtttgc   |
| 31681 | ataaaaactaa | gtgatataact | gtataatagt   | atatataaac  | ttactatgca  | aataagagatt |
| 31741 | agtgatgggt  | aataattttt  | tagcattcaa   | caagtataat  | agtacaatac  | taattgagga  |
| 31801 | aaaaagcatt  | tacataaatc  | tattgtaagt   | aaaaatatta  | taatatfttta | aattaagtat  |
| 31861 | ttacttttaag | taaattttat  | aataagtftta  | atagtgtctg  | ttactgctaa  | taaccctcta  |
| 31921 | gcctcacacc  | taaaagcagt  | aacagacact   | attaaacttt  | atgacaagtt  | tataatctgt  |
| 31981 | aagatcaaag  | tcttacaagt  | ttctttatftt  | aattatacat  | tgcagtttgt  | taattaactt  |
| 32041 | ttaatgccta  | tggtggcatt  | tacagcttgg   | accaaaggftt | tatgtattat  | agaaaataat  |
| 32101 | tataaaaaaa  | acacactatt  | tgtataccat   | acaaactftt  | tttattctgc  | atagctgagt  |
| 32161 | tactagattc  | tgtaaacgaa  | atcttttagag  | aagccaaatg  | ggcaaagttt  | catgaaggtc  |
| 32221 | tttggcatct  | cttagcatag  | atcccttact   | taaccatcat  | accgcatctc  | attcgcatga  |
| 32281 | tctcaaagca  | tagatcccgc  | taacacgtag   | cgggatgacg  | attgtcaggc  | tagctgtcat  |
| 32341 | cccagtgtca  | agcactggga  | tgacaaggta   | taaaccttat  | cgatcatgccg | ccacaaaccg  |
| 32401 | tcataccgca  | attcattcgc  | ggtatctcta   | gatcccgccta | acaagtagcg  | ggatgacgat  |
| 32461 | tgtcgttttag | ccataaacat  | taagaaattt   | accaaataaa  | aaaaaggcaa  | aagaagccct  |
| 32521 | ggggttatta  | tccgctttta  | aatattggcg   | ttttttatgt  | tttaaagcgt  | tgacaagcga  |
| 32581 | aattcagctg  | cttttaattg  | caactaacct   | acgctgcaaa  | tgtttaagaa  | atttactaag  |
| 32641 | cagaaaaaaa  | gacaaagaat  | ccccgagtta   | gctagtcttt  | tactatctct  | gtcgagtatt  |
| 32701 | ggcatttttt  | gatgtcttgt  | aacgctttat   | aagcgcgftt  | cggcttatat  | aggtaaaaaac |
| 32761 | ccagaaattt  | ttaaagacat  | gcgatgcacg   | tagtgcgaaa  | aattaaacat  | gagacgccaa  |
| 32821 | ataccctaag  | tttgactcgc  | gacataatgt   | tgaacatttt  | tttttgcat   | tccagagcaa  |
| 32881 | gttcttgaaa  | cctaaacatt  | atatgtacat   | catcatgatc  | aattctaattg | catctaacta  |
| 32941 | atgctatgat  | gaccttaccc  | agaaaaagtg   | gagagaaaagt | gtggaatgtt  | ttttacaaaa  |
| 33001 | agaatgatgc  | atcaaattgt  | tctggaatgc   | aatagttaat  | agtgacgttg  | tttgttataa  |
| 33061 | aaaattttcta | tatatccaac  | tatagcagtt   | ttgatattgt  | gttttagagt  | ccgagagggtg |
| 33121 | tctattggta  | actccctftt  | agagaactga   | agaagctftt  | cacaacagaa  | ttgtcgtaac  |
| 33181 | aacaaccttt  | atgactcatc  | tatgtttftt   | atggataaga  | gatattgata  | accttgcaaa  |
| 33241 | gtatattgtg  | aaccttgatc  | actatgtaat   | agtagatttt  | tggcagggtt  | acgcttgfta  |
| 33301 | acgtccatta  | ataaagagtc  | cataaccaat   | tgtttattta  | ttgaactgct  | cattaactac  |
| 33361 | catgcgtgaa  | tatagatcga  | ttattgttgc   | caaataatagc | catccttctt  | tggtttttat  |
| 33421 | ataagtaatc  | ccataactfta | tttggttgat   | cgacaataaa  | gttttggtct  | aatatattgg  |
| 33481 | gagctactgt  | cggtttggtg  | tttcttaatt   | ttaaattftt  | ttctcaatat  | agcctgaata  |
| 33541 | ccatttttct  | gcataataact | ttgcactgtt   | tttaagttgc  | aactftttacc | caaagccttt  |
| 33601 | aattcagcat  | gaatttttagg | agctccatat   | ctacatttag  | aagcttgata  | tattttttga  |
| 33661 | atatctgcta  | ataactcttt  | atttgctgat   | tctctactgc  | ttatttttct  | tgtgggtccac |
| 33721 | ttatagtagc  | cactagcaga  | aaatcctaca   | taattcctgt  | actttatagc  | agttactata  |
| 33781 | taaaaaaaata | ttttactctt  | tttgactggc   | cagggctftt  | tttaaaatgt  | ctctttctct  |
| 33841 | tgttactftt  | gctaactctt  | tctgtaaatc   | aaatctctct  | ttgtcataag  | gtgctacatc  |
| 33901 | tggaaatgca  | tttgccgctg  | actfttttctg  | ttataatttct | tcataccattt | tcctaataca  |
| 33961 | ctatccctta  | ttcctagatc  | tcttgctact   | tttgcaactg  | gttgacctac  | ctttctttgt  |
| 34021 | tcatttgcca  | gcttaacagc  | ttccaatttg   | aattctgccg  | tataattctct | tgccatttct  |
| 34081 | aatcctccaa  | aattttatftt | taccgaaaaa   | aactcctftt  | tttctctcca  | ctttttctgg  |
| 34141 | gtaagggtcaa | ttcggaactc  | tatttctftt   | ttacgatctt  | tactftttatt | cttattgttc  |
| 34201 | atataatata  | cccttcacta  | ataataaatt   | atttttaaat  | gtttactgtt  | attttcttag  |
| 34261 | cagtattggc  | ataaagccat  | agcttttggg   | tgaagtcaaa  | tcaaattftt  | aatttttttt  |
| 34321 | gtttattftt  | ttatgaaaag  | gtagaagata   | ttaatagctg  | ctaatttctt  | taaacgatgt  |

|       |             |             |             |             |             |             |
|-------|-------------|-------------|-------------|-------------|-------------|-------------|
| 34381 | tgtcgtagat  | tcgatattttt | atacaccaaa  | aagggatatct | ttgatatctc  | ctacagctcc  |
| 34441 | aaactcatag  | catccatttg  | ccagcctttt  | aaggcgcttt  | atagaagggg  | taataaaaaga |
| 34501 | tgtaaaaagg  | acgtctaagg  | tgcgtagtag  | cattctaaag  | ccatctatgg  | gagacatttt  |
| 34561 | tttcatcaac  | gcattcaaaa  | cttaaaaaaa  | taaaaaactt  | gaacattttct | tcagaattgt  |
| 34621 | gtataattat  | taatgctttt  | tgtgtgccgt  | agagatacaa  | ggaatgttca  | ggaaagagca  |
| 34681 | aactaagtgc  | gaaagctgca  | caatagatga  | gggtggaccc  | ctcggagccg  | gtttacaaga  |
| 34741 | gcaggcttca  | aacaaccata  | agctgctttg  | gtaaagagcc  | aaggtagtga  | gcgttatgga  |
| 34801 | aaaggcgtaa  | ttatgctgca  | tgtgtgaaat  | agagagatga  | acgcaagtga  | accactgatt  |
| 34861 | acacgtcgaa  | aggtaatgcg  | atgatgtcaa  | aaccagggga  | gaaaaagtaa  | cttgggataa  |
| 34921 | gcctatcggg  | aacttgtcta  | ctgggtaggt  | ggcatccggc  | atataggtgg  | catgaaccta  |
| 34981 | tttcaggcta  | ttgtgtggaa  | ctacgggaac  | ctgtcgtttc  | gatgataagg  | gagaagtcca  |
| 35041 | aggagctgaa  | ctctaaggaa  | gagagtactg  | atgcgaaaaa  | caggggaggga | ttagcttgta  |
| 35101 | gtagtgaaga  | agtttttgta  | atggaaatgg  | agcgaagggg  | ctgagttatt  | tagttttaat  |
| 35161 | tatttatcaa  | ccgaaaggga  | agagttaatg  | aataaaaaca  | aatcttttga  | cataccaaag  |
| 35221 | caactgattt  | ggaaagctta  | taaacaagta  | tccaaaaaca  | gaggtgcggc  | aggtgtagat  |
| 35281 | gaggtctcga  | taacaaagtt  | tgaagaaaat  | ctaaaagata  | atctatacaa  | actgtggaat  |
| 35341 | cggatgtcat  | ccggaagtta  | ttttccagaa  | tcagtaaaaag | ctgttgcgat  | accaaagat   |
| 35401 | acaggaggac  | aaagaacttt  | atgtgttcct  | tcagtattcg  | acaggatagg  | gcaaacagca  |
| 35461 | gctactatgt  | atctcgaacc  | gttagtagag  | ccggaatttc  | acgaagattc  | atatggttat  |
| 35521 | agaccaaaaca | agtctgcact  | ggatgcggta  | agtacagcgt  | gtaagagatg  | ttggagaagt  |
| 35581 | gattggacga  | tagatcttga  | tatttctgga  | tttttcgaca  | atctggatca  | tgtgttagca  |
| 35641 | ctgcaaacta  | tcaagaagca  | tacagattgc  | aagtgggtca  | tactgtacgt  | ggaaaggtgg  |
| 35701 | atgaaagccc  | cgattcaact  | agcagatggc  | agtaaggtag  | ttaggaataa  | gggagttcca  |
| 35761 | caaggaggtt  | ctgtaagccc  | aatcatttct  | aacataattta | tgcacatgc   | atgtgatatg  |
| 35821 | tggatgaggc  | aaaactaccc  | aacaataccg  | tttgagagat  | atgtagatga  | tgcaatgggtg |
| 35881 | cactgtaaaa  | cccagaaaca  | ggcaaaattc  | ataaaagaca  | agatcgaaga  | aagattggct  |
| 35941 | gagtttaagc  | taaaattaca  | tcctgaaaag  | acacaaatag  | tgtactgtaa  | ggatgacaat  |
| 36001 | aggagagatg  | agttttccaat | acagagcttt  | gacttttctgg | gttacacgtt  | cagacctaga  |
| 36061 | ctggcaaaga  | acaataaaaat | aggaaactat  | tttgtctcat  | ttctacctgc  | aattagcaac  |
| 36121 | aaagccaaga  | agaagatcaa  | ccaaaccata  | aggatcatgga | aaatacgtag  | gcaaacatat  |
| 36181 | acaacactag  | agaaaatatc  | aaagaaaata  | aatcctatag  | tccgaggctg  | gtatcagtac  |
| 36241 | tatggcaggt  | tttataaaatc | agagatgtat  | ccatctctca  | gaaatgtaga  | gtggcaccta  |
| 36301 | gtaggatggg  | tcagagccaa  | atataagaaa  | cttcgaaatc  | atagaagact  | agcaaagcaa  |
| 36361 | tttctagcaa  | aagtgagaaa  | gaggtctcca  | aatatttttct | atcactggac  | actaggattg  |
| 36421 | ggatcaaaaag | gctgaataac  | gggagctgta  | taaattgaga  | ggttttacgta | cagttctgcg  |
| 36481 | agagactggg  | ggggaagctc  | cgccggtcta  | ctctccaagt  | ggatttccta  | ttgttctttc  |
| 36541 | taagttcctt  | ggtgcacgta  | acgattattc  | tttaaaaaga  | atattggcta  | ctgagaagaa  |
| 36601 | tgaagacatc  | ttcatcagaa  | aaaaaagggg  | caaaaacaga  | gaaaattgac  | gtagctactt  |
| 36661 | aaggcaggtg  | tctctattgc  | agctgagaca  | actgatctac  | tcacatgata  | atgaaaaagt  |
| 36721 | tataagcata  | cagattggat  | tacagtatct  | tttttaagaa  | gaagatttat  | cttgcttaaa  |
| 36781 | aacttgtaga  | tactatatatt | tacatacatt  | cttcatgcga  | ggccttttatg | tttactaata  |
| 36841 | gaatatctaa  | taatctggat  | cagctgcaat  | tttttgtaga  | gtttttaaat  | gaaaattatg  |
| 36901 | aaattcagaa  | acatcttagt  | cttacaccac  | tacatttagc  | agcaggaaat  | ggtcagttgg  |
| 36961 | atttagtcaa  | cactttatta  | ggagaagggt  | tagatatata  | ttcagagatt  | aagtacgatg  |
| 37021 | gctttacgcc  | actgtatttt  | tcaattgcaa  | aaaatcgctt  | agagatgggt  | aactttctta  |
| 37081 | ttgctcatgg  | agcagatgta  | aaccataaga  | ccattctagg  | ctttacacct  | ttaagttttg  |
| 37141 | catcccagca  | aggatatatta | gatatagtca  | acaccttgat  | tgcaaatgga  | gcagatctta  |
| 37201 | gtactaaaac  | agataaaactt | aatacacctt  | tacacctagc  | agcagagaaat | ggatcatctag |
| 37261 | atatagtaaa  | tgtttttatt  | gaaaagggat  | tagatgttaa  | tgctgtaaat  | aatgatcgag  |
| 37321 | caagaccttt  | gcattctgca  | gtacaaaatg  | gtaacctcga  | agtagttaaa  | gctcttattt  |
| 37381 | cacaagggtc  | taatattaac  | gctggatctt  | caggcatagg  | taatcataaa  | gttgatgcaa  |
| 37441 | acattacacc  | cttacatctg  | ggaacacaaa  | ctggtaggtt  | agatatagtt  | aaagttctgc  |
| 37501 | ttgaagcggg  | agcaaacggt  | aatgcaaaaa  | cagatgataa  | gattacacct  | ctacatttag  |
| 37561 | cgtctcaaaa  | tggtcttttta | gagtttagtag | acatttttact | aaaagcaaaa  | tctaattgta  |
| 37621 | atgctaagga  | ttatgagaat  | cttacacctc  | tacatttagc  | agcagaacgt  | aatcactttg  |
| 37681 | gagtagttaa  | gtctcttctt  | ctcgtaaggg  | gaattgatgt  | taatgctaag  | gaccacgata  |
| 37741 | attccacagc  | tttaccatata | ggatctcaga  | atggctactt  | agaagtagtg  | aagctactaa  |
| 37801 | tagagaaaaa  | agccaatggt  | aatgctaata  | aaaaacgaag  | gttttacacc  | tttgcatcta  |
| 37861 | gcaattcagc  | aaagtcattt  | cgaggtgagt  | gatttttttaa | ttaaaaatgg  | agcaaacatt  |
| 37921 | aacaccgtgg  | atgatcagaa  | ttggactcct  | ttacataatg  | cagcatataa  | tggtttttct  |

|       |             |             |             |             |             |             |
|-------|-------------|-------------|-------------|-------------|-------------|-------------|
| 37981 | ttaaaaatag  | tagagagcctt | aattgcaaaa  | ggagcaaata  | taaatgcaaa  | gatggatgat  |
| 38041 | ggtagaagag  | ctctacattt  | ggcagcagaa  | cataatcgct  | tggaaataat  | gaatttcttg  |
| 38101 | attgaaaatg  | gagcagatat  | taatgctcta  | gataacagaa  | gttggactcc  | tctacattgt  |
| 38161 | gcagcatatg  | atggtaattt  | agaagttgct  | aaatctttgc  | ttgataaagg  | agcagacatt  |
| 38221 | aatgctaaaa  | cagttaaaaag | tactacacct  | ctacactttg  | cagtagacca  | tgatcattta  |
| 38281 | gaggtgggtg  | aattgctcctt | agaaaaggaa  | gcagatatta  | atgcttttaga | tcacacaaat  |
| 38341 | tggactcctt  | tacatttttgc | agcagaaaaa  | ggttatgatc  | agatagcaac  | cgttctattg  |
| 38401 | aaacatgggtg | ctgatgtaaa  | tgtaaaagaa  | aatcaaaaata | aaggcacagc  | cctacatcctt |
| 38461 | gcagctcaat  | atggtcatcc  | taaggtagtt  | aaaactctta  | ttataaatgg  | agcggatggt  |
| 38521 | aatgcaaaaa  | tggataaaaa  | tgctacgcct  | ttacacttag  | gggcacaaat  | tggtaattta  |
| 38581 | gatatagtta  | ggtctctact  | tatgagcgga  | gcatacttta  | atgctagagc  | tgaaggaggt  |
| 38641 | agatatgttt  | taccattaca  | ctttgcgga   | agaagaggaa  | accagaagt   | aataaaatta  |
| 38701 | ctaaaattgg  | ttgagaagtt  | atttaaggct  | atagaagata  | ataattat    | aggaattgag  |
| 38761 | agttccatta  | gagatggagc  | aatcattgat  | tcgaagaacg  | tggatggaag  | aacgccatta  |
| 38821 | cattatgctg  | ttataaatgg  | gcacataaaa  | gttgtaaata  | tcttactaac  | aaatggagct  |
| 38881 | aatgttagtc  | aagttactaa  | taaaggtaat  | acaccattac  | acactgctac  | ttccaaatgt  |
| 38941 | tacaaagaaa  | ttgttgaggt  | tctgttacaa  | catatcagtc  | gtgataaatt  | aaatgacttt  |
| 39001 | gttaatgcta  | aaactacttc  | tagtggtagt  | acatcacttc  | atgttgcagc  | taaagggtggc |
| 39061 | tccttggaag  | ttgtaaaatc  | tttattaaaa  | catggtgcaa  | tttataacat  | caagaataaa  |
| 39121 | gaaggtaaag  | caccacttga  | tctttctcga  | gaccaaaata  | ttactaacct  | attgaaatta  |
| 39181 | gtagaagagc  | tgtttgagaa  | tgcaaaaaat  | ggtaatgttg  | aaattatcag  | taagctgaaa  |
| 39241 | gcaataaaac  | ccgatgagcg  | cgtagctgta  | acaaatgctc  | gtgatgatca  | aggcaagtcg  |
| 39301 | ttagtccagg  | ttgcagtaat  | caataaacac  | tcaaaccctg  | caagtagatt  | attagaaata  |
| 39361 | ttaaaaagtc  | cagatcagag  | tttacaagat  | gtcagcgtag  | aaaatcgagt  | aaagagtttg  |
| 39421 | aagttatagc  | tctcttaaat  | gaaactctaa  | tgagggtgcc  | aagatctaga  | tcatttagaa  |
| 39481 | aattatagtg  | ggctttacat  | cttattaatt  | ataaattaac  | ttactatcta  | atcaatccct  |
| 39541 | aagtcatgta  | tgagtaacat  | tcggcgctcaa | gactcctgcc  | agcatagaaa  | atatcagttc  |
| 39601 | ctatataaat  | atccttatgg  | gctaaaagaa  | acttctattg  | gttgatagaa  | aacagaaaaa  |
| 39661 | aactatttta  | aaagtatact  | caacaatata  | acaaggaagc  | ataagttagg  | gaaagtagta  |
| 39721 | ggccgttgat  | aaggatttgc  | ctattttctc  | gatcaactag  | cttttgtata  | agtactgatg  |
| 39781 | ggtcaatata  | aatgagtagt  | tctgggaagc  | ttactttatc  | ggctaatacta | tattagcgtc  |
| 39841 | atagaggatt  | tatatatttc  | aagcatgtta  | attatttttt  | ctggatcatt  | taggaaacta  |
| 39901 | tagtagactt  | tacaactcat  | taattatcac  | ttaacttacc  | tcctagtaag  | ttcttgagtt  |
| 39961 | atgtatggat  | aacacgttga  | taatatttagc | agcaggaaaag | agcagtagaa  | tgaattctga  |
| 40021 | atatccaaaa  | gcgttgcacc  | aagtgggaaa  | tcttactcct  | ttagaacata  | taatttctaa  |
| 40081 | tgcaaaattg  | ctgagtctaa  | aaagcttatc  | aattgttggt  | aacaactccc  | ttctaaaaga  |
| 40141 | tttagaaaag  | tttgataccc  | taaaaagtat  | aatcgatcaa  | tacaatataa  | aactaataat  |
| 40201 | tcaagaagat  | attacaggta  | ctggcactgc  | agttaaaatt  | gctctagaaa  | atctggagga  |
| 40261 | gttatctgat  | caagacatag  | ttttaataca  | gtatggagac  | actcctttta  | tatctagtga  |
| 40321 | tacagttatg  | aaaatgactg  | attgtttaaa  | gtgtaataat  | aaaaatttag  | ttcttcttgg  |
| 40381 | atttaatagt  | caagataaagc | aatatggaag  | attagtaatt  | gatgataatg  | acaatgttca  |
| 40441 | aaaagtcttg  | aaaagtgaag  | atgaaattct  | tcttgcaaac  | tctggaataa  | tggtttcata  |
| 40501 | cgctaaagat  | ctttataccc  | taataaaaaga | agtaaaaatt  | aatgattcga  | ccaacgaatg  |
| 40561 | ttgtcttaat  | gatataatac  | ccattgcagc  | aagcaataac  | ttacgtgcag  | gttatgtagt  |
| 40621 | cgctgacgaa  | aaggaagcaa  | tgggggtaaa  | taacaaagag  | gatttgggtca | aagcagaacg  |
| 40681 | ttatttttcag | gcaaatagaa  | gaagacaacc  | aacccttctt  | tcataactat  | atTTTTTTTat |
| 40741 | tcattgatcc  | ttaatTTaag  | ttgacatttg  | TTTTatacta  | gttttataat  | gcttttttaag |
| 40801 | tcttactttg  | aagatgatag  | gtgtgaaaga  | TTTTcctggt  | tgtagtgaga  | gggacacatg  |
| 40861 | ggaatattaa  | taacaggtgc  | tgcaggtttg  | ataggatcgg  | ctttagtaga  | aaagttagaa  |
| 40921 | aagcagggtt  | atgaagtaat  | aagctgcgat  | attaggtttc  | gcgacaaccc  | actcagtttt  |
| 40981 | ttttcagaag  | atataatgcc  | gctactcgct  | aagtgtacgg  | gggttattca  | tctggctgca  |
| 41041 | atttctagag  | ttatacatgg  | tgagctttat  | cctaaattgt  | gccaaaaagt  | taatgtcgat  |
| 41101 | ggtacaatcc  | aattcttaga  | attctgcaag  | tcgcttccga  | ataaaccatg  | gtttatatat  |
| 41161 | gcaagcagta  | gagaagtata  | tggagaacaa  | aaggaactac  | cagttgcaga  | gtctgctagt  |
| 41221 | attaacccaa  | taaataatta  | cgccaaaggt  | aaagcgttta  | ttgaagaaca  | agtaataaat  |
| 41281 | ttaaaagggt  | ctaactttta  | tgtagcaata  | ttacgcttct  | caaatgtata  | tgggtggttta |
| 41341 | ctagatcata  | gtagtagagt  | aattcctgca  | ctctgtatca  | atgcattgaa  | aggcgatcca  |
| 41401 | attaggatag  | aaggtaaaaga | atgtgttttt  | gattttacct  | atttgatgga  | tgttatagag  |
| 41461 | ggtatatact  | taactgttaa  | atattttacaa | aacgagaaat  | cttctcttcc  | tgctattcat  |
| 41521 | cttactacta  | atagcccatg  | tacttttagaa | aacttagcaa  | aaacaatatt  | aaaagtcacg  |

|       |             |             |             |              |             |             |
|-------|-------------|-------------|-------------|--------------|-------------|-------------|
| 41581 | gaaagtgatt  | ctagaattga  | tttttatacct | ccaagaaatt   | ttgacgtaac  | taagttccat  |
| 41641 | ggtgatttta  | ctagagctaa  | agagctactt  | ggttggtctc   | caaaacattc  | attagaagta  |
| 41701 | ggattaagta  | aattttataaa | aagtctacaa  | aacaatacac   | agaatatatcc | taacaatata  |
| 41761 | gatatggtaa  | tatatgaaaa  | tattaaaagt  | tattcatggt   | taccctcctt  | attatagtgc  |
| 41821 | tggttcagag  | gtttatagcc  | aaactcttgc  | tcatgaacta   | gcaaataaca  | atgaggtaga  |
| 41881 | agtattttact | aggtatgaaa  | atagcttttt  | acctgatttt   | tattacacta  | cagtcctaga  |
| 41941 | tagtagtgac  | tctcgaatct  | tactgcattt  | aattaatatata | cccacagcta  | aatatcgtta  |
| 42001 | caaattttatc | aatgaagaag  | tagatatata  | atttaaaaga   | gtaatagata  | actttcagcc  |
| 42061 | agatcttata  | catttttggtc | atcttaataca | tctatcaatt   | actttaccag  | aaattgcttt  |
| 42121 | taaagaaaat  | atacctacaa  | tttttacgct  | acatgacttt   | tgggttaatgt | gtccaagagg  |
| 42181 | aaggttttatt | caacgcaatt  | ctgaagattt  | gttacggctt   | tgtgatggac  | agaaggatca  |
| 42241 | aaaatgtgca  | acccaatggt  | acaaggggta  | ttttacagga   | gatgaagaat  | tcttgaattc  |
| 42301 | agacttaaat  | tattgggaac  | aatgggttgc  | aactagaatg   | aagcaaaca   | agaaagtagt  |
| 42361 | ggactatata  | gattacttca  | ttgctccgtc  | aaaatttctta  | atggataaat  | ttactcaaga  |
| 42421 | ctttaatggt  | ccgataaaca  | aaatttctta  | tcttgattat   | ggttttgatc  | taaatcgtct  |
| 42481 | taagaataga  | aataggggtgc | aagaaaaaga  | gtttattttt   | ggttatatag  | gtactcatatc |
| 42541 | tcccgagaaa  | ggtggttgacc | tattattgaa  | ggcttttttct  | cgcttatcat  | ctaaagcaaa  |
| 42601 | acttagaatt  | tggggagcag  | caagagaaga  | aactaaagct   | ttaaaagcga  | ttgccgatca  |
| 42661 | gttttcacct  | gttggttaaag | aaagaataga  | gtggatggga   | agttatgata  | ataagaatat  |
| 42721 | agttactgac  | gtattttaata | aagttgatgc  | aatagtcgtt   | ccttcaattt  | ggggtgaaaa  |
| 42781 | ttcaccatta  | gtaatacatg  | aagcacagca  | acttagaata   | ccagttataa  | cagccgatta  |
| 42841 | tgggtggtatg | gcagaatatg  | taaaagatgg  | actattattt   | aagcacagag  | atgcaagtag  |
| 42901 | tttgtcagaa  | aaaatgcaag  | tcctatctac  | aaatcaggag   | ttatacaata  | aacttaccca  |
| 42961 | aaaaggctat  | ccttatactg  | aaaatggaaa  | tataccttct   | ataagtgagc  | atactgaaaa  |
| 43021 | acttaacaag  | atttaccgta  | atgctattga  | aaagaaaggc   | aaatcagtag  | ctgttaaacc  |
| 43081 | cggtccttgg  | agaattactt  | ttgatactaa  | tccagattac   | tgcaattttt  | cttgataaat  |
| 43141 | gtgcgaatgt  | ttttcaccat  | acagtaaagt  | taaagaagag   | aagaaagcta  | aaggaataaa  |
| 43201 | acctaagata  | ctatcaatag  | aaactatcag  | aaaagtaatt   | aaagaagcag  | ctggtacacc  |
| 43261 | tttaagggaa  | atcattcctt  | ctactatggg  | tgagccttta   | atgtataaaa  | gctttgatga  |
| 43321 | aataatcaat  | ttgtgccatg  | agttcggcct  | gaagcttaac   | ctcacgacca  | atgggtcttt  |
| 43381 | tcctattataa | ggagctagaa  | aatgggctga  | actattggta   | ccaattttat  | ctgatgttaa  |
| 43441 | gatttccttg  | aatggggcaa  | ctaaagaaac  | tcatgaaaga   | atcatgaaag  | gttcaaaatg  |
| 43501 | ggaagtagtg  | acagaaaatt  | taaaaacttt  | ccttgaagtt   | agagataaat  | acttttagcga |
| 43561 | tacaggtgaa  | aggtgtaccg  | ttacttttaca | attaacattt   | ttggaaagta  | atttacatga  |
| 43621 | actctatgac  | atagttaaga  | tggccataaa  | aaacggcata   | gatagagtta  | aaggacatca  |
| 43681 | tcttttgggca | catttttgagg | aaattaagga  | tctatctatg   | agaagagatg  | agtttagcaat |
| 43741 | tagtagatgg  | aacacggagg  | tgagaagggt  | atacgaactt   | agagataata  | ttctattacc  |
| 43801 | aaatggtaaa  | aagataaaaat | tagaaaaattt | cacaatcctt   | tctcaagaag  | gtattaagga  |
| 43861 | tttgggtcca  | ggtggtcaat  | gcccattttt  | aggtaaagaa   | gcatggataa  | acaatgaagg  |
| 43921 | aaagtttagt  | ccttgctgtg  | ctccagatga  | actccgtaag   | acattaggaa  | attttggtaa  |
| 43981 | tgtaaatgag  | gttaaactcg  | aggaaatatg  | gcaaagtagc   | gagtacctaa  | acttacaaaa  |
| 44041 | gaattattta  | aactatgaat  | tatgcaaaac  | atgcaacatg   | agaaaaccat  | tagtcaatta  |
| 44101 | atgaaagata  | gtgagtacct  | taaatctatt  | agggtttccc   | cctgtgaaaag | gtttcaccaa  |
| 44161 | ttgtcagaaa  | atccttttgta | caaaaataga  | tttatttagag  | ttgataaaatt | tcacgagcct  |
| 44221 | ggccttgcac  | cagtttatga  | tgagacaggc  | gcttatcaca   | tcgatgcaat  | gggagaagca  |
| 44281 | atztatcgcg  | acagattttt  | aaaaactttt  | ggatttttact  | gcaatagagc  | agccgtagaa  |
| 44341 | gatgacacag  | ggtattacca  | tattgatcca  | tctggatgta   | gagtatacaa  | acattcgtat  |
| 44401 | caatggattg  | gaaattacca  | agaagatatt  | tgtgtgatta   | gaaagcatga  | taagtttttt  |
| 44461 | catattgatt  | tgaacggcaa  | tagagtttat  | gagcaagaat   | acaattatgt  | tggggatttt  |
| 44521 | aaggatggta  | tcgctgtagt  | ccataaagat  | ggtaaagcta   | cacatatata  | taatcatgga  |
| 44581 | aagttagtac  | ataataaatg  | gtataaaaaag | cttaatgttt   | ttcataaagg  | atttgctatt  |
| 44641 | gcagaagata  | agcatggctg  | gtttcatata  | gatattaatg   | gcaatcctgt  | ttaccggcaa  |
| 44701 | agattttaaaa | tggtagaagc  | attctataat  | ggcatggcaa   | aagttgaaac  | ttttgaaggt  |
| 44761 | gtattaggac  | agatcgatat  | taccggaaaac | gtaaagttta   | gtattttttga | tttagataaa  |
| 44821 | gaatctcaag  | tgcataagat  | ttctgcagaa  | ctttcagcct   | tttggaaaac  | ttacctcgca  |
| 44881 | aatgtttgcta | ttgaacttga  | tttgttaaat  | atcttacctg   | caactatgcc  | agttttatct  |
| 44941 | caaaagtttaa | atattatcgt  | tccaaactta  | gaaaggctgt   | taagggcggt  | gtgggaaata  |
| 45001 | gggtttattg  | attacgataa  | gaacaaggac  | ttatggcaac   | tatcatcaaa  | aggtaagtgt  |
| 45061 | tttaaggaaa  | taccattttt  | gcctaaagca  | gcagcaatgt   | gggcaagggt  | tgccgctgaa  |
| 45121 | aagaattggt  | taaaaattgc  | cgatatatta  | aggcaggagt   | caatatcttc  | atttgaatct  |

|       |             |             |             |             |            |             |
|-------|-------------|-------------|-------------|-------------|------------|-------------|
| 45181 | tttaaggaga  | aagaaacatc  | agaagacagg  | aaaatagcgt  | tttaccaagc | attgctagga  |
| 45241 | tattccaggt  | ttgacactaa  | agagtttaat  | tctagggtta  | atatagatgg | tgctaaaaat  |
| 45301 | atattgctat  | ttggcgtaca  | ctcttttatt  | cttgcttatt  | ctgatataca | caataaaggt  |
| 45361 | tctataggct  | tatatatta   | caacgaacat  | aaagtgccta  | ggcaggcagt | agaagattta  |
| 45421 | aaaattaaac  | tcataactca  | agaagaatta  | tcagctacaa  | attatgaatt | aggtgtcttt  |
| 45481 | tgccgctttc  | tgcagcatta  | tgatgataat  | aagggtattgt | cttattttaa | attggtaaaa  |
| 45541 | aataaaggaa  | taccacgcgt  | tttagtgata  | gaaactatcc  | tagattacta | ctccccagtg  |
| 45601 | ggaggttctg  | tagatattaa  | tgtaatgggt  | gaaacagggg  | gtaaactaag | gacattgagc  |
| 45661 | gattggaaaa  | gaatactaaa  | acaagtaaaa  | gggcttaaaa  | tttttagtat | tgtaccttta  |
| 45721 | acagattatt  | tatcagttat  | tgacattagg  | tgттаатата  | tgaaagcatt | gcaaaaaaat  |
| 45781 | ggtttttttta | ttatcaaaaa  | tctagttcct  | ttagagttaa  | taactcagtc | tttaaatgat  |
| 45841 | ataataagca  | agatatcaaa  | gttatctcaa  | gaattaggtg  | tttcaacttc | tgactattta  |
| 45901 | aactgcactg  | gaagatgggg  | tacatcatct  | caggtaacta  | gaattgtatc | tcaagtatta  |
| 45961 | gataaaatta  | ttaaaaatta  | tcttgaaaag  | tcacttcaat  | gccagatact | gcagaaaaaa  |
| 46021 | tcaaatgtta  | tatgtaaaac  | tgctgattta  | atagatgcag  | ttcccttcca | tcaggacatc  |
| 46081 | tcttatagct  | ttaatgaccc  | ttatcatttt  | tctgtttggc  | tagctttgaa | taatgtcaat  |
| 46141 | aaaacttcag  | gtgcactaca  | agttatagaa  | gatagtcaca  | actggaaaat | acagcctcta  |
| 46201 | gttgattttt  | ggcatccata  | ctttttggat  | caatactcgg  | ataaccggga | aaattataaa  |
| 46261 | attaagtcac  | tacctatttc  | agcaggagat  | gcgatagttt  | ttgattcacg | gttatggcat  |
| 46321 | ggtagtgata  | agaatataga  | tgctaaagat  | aggtttgctt  | atgttacgag | atgggttgta  |
| 46381 | aaagataaaa  | gtcttccttg  | tgtgccaaaa  | cctcagcctt  | cagtttttgg | tatattaaac  |
| 46441 | tgtggtgcat  | taacagaatt  | tatactgaga  | gaatacttat  | cattatttcg | tcgccaggaa  |
| 46501 | agtataaaaa  | caaaaaatat  | ggaagaactt  | attaagagct  | ggttagcctt | tattacagac  |
| 46561 | acaactacaa  | atattttctga | ggtcaacact  | gctgaagcta  | agcgagattt | atataagcta  |
| 46621 | cttattctga  | atcaagcgtc  | agcactacat  | gatgctggag  | acatttcagg | aaaaatatac  |
| 46681 | aaaaatttat  | ggttttcact  | gcttgatttt  | ctcaataaaa  | aagtcaatgt | ggtggagcta  |
| 46741 | gcattataaa  | tgaacaaaag  | tagagttggg  | agtttcaagt  | atatattggg | gttcattttg  |
| 46801 | aatatcttat  | ccaagtttaa  | gcttaatgtg  | cttgtaatgt  | tcctgggttg | cctagtagtg  |
| 46861 | gctgttgatt  | tatcttttag  | aaagtattta  | gtaaaaaata  | tcttagatac | agctgtaaaa  |
| 46921 | tatcaagaag  | gtaatgtaat  | tgaaaatctt  | ttattacctg  | taagcgctta | tgtttgatg   |
| 46981 | gcattactta  | ttactactgc  | tttttagattc | tatggctatt  | ttgttgacat | tcgaatgttt  |
| 47041 | acctcaatgc  | gtcaaaaaat  | agctgatatg  | tctttttaca  | ggctgcttca | gcaagaccat  |
| 47101 | tcctattatc  | aaaacaacct  | atccggaagt  | ttagtatata  | aggtcagtaa | cttaatggat  |
| 47161 | agtgtgatag  | agctaataag  | actgcttata  | gactgtttct  | ttagttatag | tatagcatta  |
| 47221 | atcttggtcta | tttatacttt  | atcactagta  | aatataaagt  | ttgcaatagc | tacattcatt  |
| 47281 | tgggtgaaca  | tttttatattt | gatttcgggt  | ttcagttttc  | gggtgcttac | cggattagcc  |
| 47341 | gatgatcatt  | ctaaacaaag  | ttcacaaagta | atagcgggta  | tagccgacag | tattttaaat  |
| 47401 | gttatatcag  | taagggttatt | ttctcggcaa  | gcgcatgaga  | ggcataaaat | ttttcaagta  |
| 47461 | tgcaagaaaa  | aaactattttc | agaaagaaaa  | ttacaatggg  | catacttttg | gctttggttt  |
| 47521 | atatatggct  | attcattttga | tatactccaa  | gcagtaaact  | tgtatttttt | aattcatgat  |
| 47581 | tatcaattga  | acaagattgc  | aataggagat  | attgctcttg  | tacttggaat | taatatatcg  |
| 47641 | attatagagt  | ttcttaacca  | tctaactagg  | aatcttacct  | aattttctac | tcatttcggc  |
| 47701 | aaagtttcag  | atgcattgcc  | aatcttgact  | accgtaccag  | aaattcaaga | taaggaaaaat |
| 47761 | gctaaaaaat  | taaattttatt | aagtggaaga  | ataacgttta  | ataatgtttc | tttttcttat  |
| 47821 | gagggtcaga  | agtcattatt  | tcaagatttt  | tcagttacca  | ttaatccttg | cgaaaaggta  |
| 47881 | ggtctagttg  | gttattctgg  | aggtggtaaa  | tctactttta  | taaacttaat | cataaggcta  |
| 47941 | tttgatgtta  | aaaaaggtaa  | tatacagatt  | gataatcaag  | tagtatcgga | agttacacag  |
| 48001 | agttctttga  | ggcaacaaat  | atctgtaata  | cctcaagaac  | cattgttggt | tcatgatact  |
| 48061 | attttagcaa  | atattatata  | tggtaaaact  | caatctacta  | tcgaagaaat | aataagagct  |
| 48121 | gcaaagctgg  | ctggtatttta | cgatttcatt  | atgactctac  | ccgatcaata | tgaaactgta  |
| 48181 | gtcggagaaa  | aaggcatcaa  | gctatctgga  | ggagaaaagc  | aaagaataat | aatagcaagg  |
| 48241 | gcatttttta  | aaaacgctcc  | aatattattt  | cttgatgagc  | caactagtca | gttagattct  |
| 48301 | ataacagaga  | aaacaattca  | aatgagttta  | tttaagttga  | tgaaaaataa | aaccaccatt  |
| 48361 | actatagcac  | accgtattttc | tacactttta  | catatggacc  | gaattctagt | atttgacaaa  |
| 48421 | ggaaaaattg  | tccaagatgg  | taaacattct  | gaactagttt  | gcaagaaagg | tctttataaa  |
| 48481 | gaactttggg  | atgctcaaat  | tggctgtcta  | aatatcaaaa  | aagaaaatgg | aaaaaactat  |
| 48541 | cgacctgaga  | agtgacacta  | caacttttaca | aagctccaac  | gttatgcacg | caataagtag  |
| 48601 | tgcaatcggt  | ggagattttg  | cttacggtga  | agacaaaagc  | tgtaacaact | tatcgggaata |
| 48661 | ttgtaaacaa  | ttattcaaag  | tagaagaagc  | attgttcgta  | accagcggta | tgcttgcaaa  |
| 48721 | taggttagct  | attgccagtc  | aaacaagtc   | tggtgatgaa  | ctaattactc | attataatta  |

|       |             |             |             |             |             |             |
|-------|-------------|-------------|-------------|-------------|-------------|-------------|
| 48781 | tcatgttaaat | tttttcgata  | gtgcaggcaa  | tgcaaaaagta | aatagtatatg | tgtttaactg  |
| 48841 | tattaggaat  | aataccggaa  | tcttagatat  | tgatgaagta  | gaatatgcta  | ttaactctaa  |
| 48901 | accgagatat  | aaaatttttg  | ctcaggtgag  | tctagtttct  | atagaaaata  | gtataaacgg  |
| 48961 | gtttaacggt  | aaaatttatc  | cttttaagaa  | acaagtagag  | ttatataatt  | tcttaaaagc  |
| 49021 | tcacaatata  | agtcttcatt  | tagatgggtgc | gagaatattt  | aatgctcatg  | ctgaaacaaa  |
| 49081 | tgttgcttta  | gctgactatg  | ctaaatatgt  | agatacaatg  | agcttttctt  | ttactaaagg  |
| 49141 | acttgagct   | ccttttggtt  | caatgcttat  | gggtaaaaga  | gagataattg  | aaaaggctaa  |
| 49201 | gaagttacag  | gtttggtttg  | ggagtggtta  | tcatcaaatt  | gggtactgcg  | ctaatgcagc  |
| 49261 | aaaatatgta  | ctacagaata  | atatctctag  | gcttaaagaa  | gataataagc  | ttgctaaatt  |
| 49321 | gtttgcagac  | aagattaaag  | aaattccaca  | tgtaaagctg  | atactacctt  | atccagaaac  |
| 49381 | taacatagta  | agcttttagta | taaaagaact  | aaatgtgact  | aatgagtttt  | ttttgagtaa  |
| 49441 | atgccaaagct | tatggtttat  | tgctctttcc  | ttggctcgaa  | tctcatataa  | gagcagttgt  |
| 49501 | tcatcttggc  | atagaggaag  | cagacataat  | aaatgctgct  | gaaattataa  | aggaggttgt  |
| 49561 | attaaattta  | gtatgagggg  | aaaaatagat  | ttcttttagcg | attcaaacac  | taatccttca  |
| 49621 | tctgaaatga  | gggaagtaat  | ggctaaagca  | aaagttggaa  | atgaagctgc  | atgtgaagat  |
| 49681 | ccaactgtaa  | acgaattaat  | agaaaccaca  | tgtaaaatat  | taggtaagcc  | agcaggaata  |
| 49741 | tttttgattt  | cggaacgat   | gtgtaatgta  | attgcttata  | aagtgcacat  | tcaaagacct  |
| 49801 | ggtgattatt  | tgttactcga  | tgaaacttcg  | catccattaa  | tagtgcaatc  | tggattaatt  |
| 49861 | gcagcccagg  | cacatgccac  | tcctttacct  | attaaaggaa  | caagaggaat  | atttactgga  |
| 49921 | gagcaaatcg  | ttgagtttat  | tactcgtcct  | agcttaagga  | atgttccaaa  | agttgggctt  |
| 49981 | gtttctgtcg  | aacaaacaac  | gaattttggt  | ggtggagctg  | tgtggccttt  | agagtatat   |
| 50041 | caagagatct  | caagtctctg  | caaaaagaac  | gacgtatcct  | ctcatttaga  | tggagcaagg  |
| 50101 | ctgttcaatg  | cttgtgctta  | tgctaaaata  | tctccaaaag  | aatatgcaaa  | ttattttgat  |
| 50161 | tcggtgttta  | ttgatttttag | taagggatta  | ggcgctccaa  | tgggtgcagt  | attggctgga  |
| 50221 | agtgaagagt  | ttattgaaaa  | agcttggtac  | tataagtttc  | aaattggcgg  | aggtatgcac  |
| 50281 | caagctggca  | ttatttcagc  | tgcatgttta  | tatgctctca  | acaacaacat  | gaattcctta  |
| 50341 | atagaagatc  | ataaaaaaat  | gcagcacctt  | ataaaaggct  | ttagctctat  | agatcaagtt  |
| 50401 | ataatcaata  | ttgacctata  | caaaactaat  | atagcgtatt  | tctcattacg  | tactgattgt  |
| 50461 | atatctgctc  | aagaattaat  | aatatacta   | atgacaaatt  | atggaattag  | gatggctaac  |
| 50521 | ataagaggta  | aaatcagagt  | tataacacat  | agagatataa  | gctgtgaaga  | tattaatact  |
| 50581 | actatatcta  | ctataagaaa  | gatactgaat  | aggtaatttc  | gattgttatc  | aattttctac  |
| 50641 | attaatgggt  | tgcaaaacttc | ttgtaaaaca  | atattatacc  | aacatagtat  | tatgctagta  |
| 50701 | tttgcattgg  | actgtttggg  | gaataggtgt  | gaactttggt  | ttctttcaat  | atttactatt  |
| 50761 | cttttttgga  | tatgtgctac  | tttacttctc  | aaggcagagt  | ataccaattg  | ctctaccact  |
| 50821 | gttaatagat  | actgaccata  | taaaatttaag | ctattttttt  | gcctgctttt  | ctttttttta  |
| 50881 | tggagtatca  | aaattcgtta  | atggaatagt  | catggactcc  | aaaaataatc  | cattatttat  |
| 50941 | gtttgggcta  | tgcaaatattg | caactggatt  | attaaccatt  | ggtatagctt  | tatcatataa  |
| 51001 | taatctaact  | ttattactgt  | taacattaat  | attattagct  | tggacacaag  | ggttaggttg  |
| 51061 | gccagctatt  | accaagttta  | tggttacaaa  | ctctagtatc  | tcttcaattg  | catcatcatg  |
| 51121 | gtgagttatg  | agcgcatctc  | agcaacttgg  | ttcttggtatt | actttaattg  | tattaccaag  |
| 51181 | tataatcaaa  | atatatgatg  | caaaaagtgc  | atttttgtac  | tctgggtctct | tatgcttact  |
| 51241 | ttttggaatt  | tatataatat  | taaaagcata  | ttacgaagaa  | agtgccaaact | ttactaccta  |
| 51301 | ttataaggtg  | cagaaatctc  | agataggtat  | caaagtgaag  | agttccatat  | ggttttctatg |
| 51361 | ttgtgctact  | ttttgtgctt  | atattataaa  | aatgggaatc  | ttcttttggt  | ttcctataat  |
| 51421 | tttaaagaat  | aaattacaaa  | tttctcttgt  | acaatcctca  | ctaataacag  | gcgtatatga  |
| 51481 | tttaggtgga  | atccttgga   | ctttaatcac  | aggaagaatt  | agtgatattg  | acttctttca  |
| 51541 | aaatagaagc  | ttgctggcat  | cactttatat  | gttgggtata  | gcactcaact  | ttattgcaat  |
| 51601 | gaactttggt  | caaaacataa  | ttcttatgaa  | ccttggtgca  | atcttatcag  | gattctttat  |
| 51661 | atgtggagtg  | caagtactga  | caggtgttat  | ggctgtagaa  | attgctccac  | aaaataatgt  |
| 51721 | atgtgcaatt  | gtaagcttaa  | caggattatt  | tgggtatat   | gcaagttcaa  | tattttcatg  |
| 51781 | cgtgctctta  | ggagtacttg  | ttaagcactg  | tggtaacagt  | attatgtttt  | tatttttttc  |
| 51841 | catttgctct  | gttggtgcac  | tcgtttgctt  | ttccatatta  | tcaagcaaag  | atcttaaaaa  |
| 51901 | actaagtaaa  | gcggtgtaga  | aaacatttct  | caacagttaa  | actttgtaga  | tagatttttt  |
| 51961 | acccaaggaa  | taaacatggg  | aaccatatct  | tagtaatagc  | tcgctatcta  | ataaattacg  |
| 52021 | gaaatcaaaa  | acattaggtg  | cagccataat  | actctttaaa  | cttgcaaaa   | cttgattttt  |
| 52081 | aaattctttc  | cactccgtta  | acaataacaa  | ggcttccgcg  | tcccttgacg  | cccctatagc  |
| 52141 | attgtccgcg  | tattctatat  | cctttagaac  | ttgcctagca  | ttatccatcc  | ccattgggtc  |
| 52201 | atatgcagta  | attttagcct  | tgttattcac  | taacaattgt  | gcaatatcta  | tagctgggct  |
| 52261 | atttcttaca  | tcatcagtac  | cagacttaaa  | agtttagccc  | catattgcta  | tttttttatt  |
| 52321 | ttggactcca  | tttaatacat  | attctacctt  | tttagcaatg  | tttgttatat  | gattatagtt  |

```

52381 agattcctta actgaattta aaatttgtag cttaacattg tggctttcag caagccttat
52441 taaagctgac aaatctttag gaaaacatga tcctccaaat cctggaccag ctttgagaaa
52501 ttccttacct attctatggt ccattcccat actgttagct aaaagttcaa tgtctgctcc
52561 taatagctca cataaacctg ccatttcatt gataaaagca acctttgttg ctagaaaagc
52621 attagaagca tatttaatat tttcagctgt aactgtatca gtgactatta acggaatatt
52681 cctatctgta aatgatctat atatagcttc tagttttact ctagctcgct tagtttttac
52741 tcctattatt attctatctg gatataaaaa atctgatact gcagagcctt gcttgagaaa
52801 ctccggatta actcccaaat caaagttgta gcccttatta gataaataat tatatatatt
52861 ttttgtagca ccaggaggaa tagttgattt tataactatt aagcaatctt gattaattct
52921 ctgagaaact tcacttactg cattatatac attctttaaa tttgcatttc ctagggagtc
52981 tgatggagta tctacagtta taaatactac ttctgtattg ggattttattt gaaaatacga
53041 atcgaaaaat cttatccttt gtgactttat attattctct aaataatctg ctaatccagg
53101 ttcatataag ggaattttcc ctgatttcaa aagttcaatc ttctcagtat ttatgtcaat
53161 gcaatcaact ttatgaccct gctctgataa cattgcacaa gatactaaac ctacataccc
53221 tactcctata atagttatgt gcattacctt aaaaatatag cttagcatct aaaataaata
53281 ccattaacaa ttataaactt ttgttggtac attatttttc ttaattgcct taccttccga
53341 ataagctata aataagggtg atggatttaa tatcaaagta ccatataaag cacttttatc
53401 aggtaattca ttaaataata catatgctac tattgcagaa attattagct ctatgtatct
53461 ataaggtgca agtgcagtag catcagtaag agcaaaagct ttaacatga agaacagaat
53521 taggtttgaa cttattccta aaatcagcag taatattaat tctaacaagg aaggcaaag
53581 ccaataaaac agcaaaggca cagtggaaaa aatagttgtt gttagagctg aataaaataa
53641 catacttatt acggactctt ttattgcgag tttcttatta agtatgtcta atatagcaaa
53701 gattaatgta gatacaataa aaataagaat ttaggatta aagtcttcac tataagcttt
53761 ggtagtaata gcaataccaa caaagccaat aacagttact gaccatcttt gccaaattat
53821 attttcattt agtaaaggga ttgcaagaag tataacaaat aatggatatag aaaaacttat
53881 aattggtgca gttactatgg gaaaaatagc taaccatag gtccacaagg ttattccaac
53941 aaataacaat actcctctag ttatctgaat agatatttga cttgttttaa aagcttctct
54001 tccatagtaa agcataaaag gtacaagggt aatagtgcct aataaaaagc ggaaaaagat
54061 tacttcaaaa ctttgagat gtaaacttag atattttgat atagtatcat tagctacact
54121 actaaataaa ctaagtataa accagata

```

```

//
LOCUS      JAQZAU010000004      3526 bp      dna      linear      ENV 17-MAR-2023
DEFINITION MAG: Wolbachia pipientis isolate wEsol contig_11120, whole genome
            shotgun sequence.
ACCESSION  JAQZAU010000004 JAQZAU010000000
VERSION    JAQZAU010000004.1
DBLINK     BioProject: PRJNA929258
            BioSample: SAMN33142973
KEYWORDS   WGS; ENV; Metagenome Assembled Genome; MAG.
SOURCE     Wolbachia pipientis (insect metagenome)
ORGANISM   Wolbachia pipientis
            Bacteria; Pseudomonadota; Alphaproteobacteria; Rickettsiales;
            Anaplasmataceae; Wolbachieae; Wolbachia.
REFERENCE  1 (bases 1 to 3526)
AUTHORS    Fiutek,N., Couger,B.M., Roy,S., de la Torre,J.R. and Connor,E.F.
TITLE      Genomic assessment of the contribution of the Wolbachia
            endosymbiont of Eurosta solidaginis to gall-induction
JOURNAL     International Journal Molecular Sciences
REFERENCE  2 (bases 1 to 3526)
AUTHORS     Fiutek,N., Couger,B.M., Roy,S., de la Torre,J.R. and Connor,E.F.
TITLE      Direct Submission
JOURNAL     Submitted (10-FEB-2023) Biology, San Francisco State University,
            1600 Holloway Ave, San Francisco, CA 94132, USA
COMMENT     ##Genome-Assembly-Data-START##
            Assembly Date      :: JUN-2019
            Assembly Method     :: FLYE v. 06-2019
            Genome Representation :: Full
            Expected Final Version :: Yes
            Genome Coverage      :: 100.0x
            Sequencing Technology :: Illumina HiSeq; PacBio Sequel

```

```

##Genome-Assembly-Data-END##
FEATURES             Location/Qualifiers
     source            1..3526
                        /organism="Wolbachia pipientis"
                        /mol_type="genomic DNA"
                        /submitter_seqid="contig_11120"
                        /isolate="wEsol"
                        /isolation_source="galls on Solidago altissima"
                        /host="Eurosta solidaginis MN-2018-EFC"
                        /db_xref="taxon:955"
                        /environmental_sample
                        /country="USA: Cowling Arboretum, Carleton College,
                        Northfield, MN"
                        /lat_lon="44.48 N 93.13 W"
                        /altitude="280 m"
                        /collection_date="2018-11"
                        /metagenome_source="insect metagenome"
                        /note="metagenomic"
     gene              complement(34..216)
                        /locus_tag="wEsol_00068"
     CDS                complement(34..216)
                        /locus_tag="wEsol_00068"
                        /codon_start=1
                        /transl_table=11
                        /product="hypothetical protein"
                        /translation="MLYSLWLLTLIFCGIFFLSRLNGYFIMNFVSSHQIFSVAMQQSH
                        PSVKHWDDTLLVETLL"
     gene              173..502
                        /locus_tag="wEsol_00069"
     CDS                173..502
                        /locus_tag="wEsol_00069"
                        /codon_start=1
                        /transl_table=11
                        /product="transposase"
                        /pfam="DDE_Tnp_1_5"
                        /fullproduct="qcoverage 100 , hcoverage 100 , similarity
                        100 , identity 100 , evalue 1.19e-72 , alnlength 109 ,
                        Bacteria , Proteobacteria , WP_007548762.1 MULTISPECIES:
                        transposase [Wolbachia]"
                        /translation="MPQKMRVSNHSEYNKFLEKRGNIIFYINEAIEKWYENGPKIPGG
                        NNIYSDKVVILVHIITCLFRIGLRQTVGFIAGYLEQIGKNLQVISYSQSSRRFKKLN
                        KINDCRK"
                        /besthit="qcoverage 100 , hcoverage 100 , similarity 100
                        , identity 100 , evalue 1.19e-72 , alnlength 109 ,
                        Bacteria , Proteobacteria , WP_007548762.1 MULTISPECIES:
                        transposase [Wolbachia]"
     gene              486..686
                        /locus_tag="wEsol_00070"
     CDS                486..686
                        /locus_tag="wEsol_00070"
                        /codon_start=1
                        /transl_table=11
                        /fullproduct="qcoverage 100 , hcoverage 100 , similarity
                        100 , identity 100 , evalue 3.80e-36 , alnlength 66 ,
                        Bacteria , Proteobacteria , WP_010082383.1 MULTISPECIES:
                        hypothetical protein [Wolbachia]"
                        /translation="MIAENNMEDIEIAIDSTGISIYNNTPGHSEKENSEDRKYRSYEQT
                        RKLHVMLNTNSKKAIAVKYSNG"
                        /product="hypothetical protein"
                        /besthit="qcoverage 100 , hcoverage 100 , similarity 100

```

```

, identity 100 , evalue 3.80e-36 , alnlength 66 ,
Bacteria , Proteobacteria , WP_010082383.1 MULTISPECIES:
hypothetical protein [Wolbachia]"
gene 706..1113
/locus_tag="wEsol_00071"
CDS 706..1113
/locus_tag="wEsol_00071"
/codon_start=1
/transl_table=11
/pfam="DDE_Tnp_1 DDE_Tnp_1_2"
/fullproduct="qcoverage 100 , hcoverage 100 , similarity
100 , identity 100 , evalue 8.54e-92 , alnlength 135 ,
Bacteria , Proteobacteria , WP_007548764.1 MULTISPECIES:
transposase [Wolbachia]"
/translation="MLKEVDFQYVIKVLVYADRAYDREKLYKLCNQYGIKTKIPPKNNA
AEHPKLDYMAERNSAVKLIKSYDEDGIKKWKKEMSYGKRSYIESFFSRLKQTFGFSFR
NKSETNREKELLVKCYLLNKFTDIGMAKFEIAS"
/product="transposase"
/besthit="qcoverage 100 , hcoverage 100 , similarity 100
, identity 100 , evalue 8.54e-92 , alnlength 135 ,
Bacteria , Proteobacteria , WP_007548764.1 MULTISPECIES:
transposase [Wolbachia]"
gene complement(1116..1400)
/locus_tag="wEsol_00072"
CDS complement(1116..1400)
/locus_tag="wEsol_00072"
/codon_start=1
/transl_table=11
/fullproduct="qcoverage 100 , hcoverage 100 , similarity
100 , identity 100 , evalue 1.29e-60 , alnlength 94 ,
Bacteria , Proteobacteria , WP_041573534.1 hypothetical
protein [Wolbachia endosymbiont of Drosophila simulans]"
/translation="MGNSKINNSANFSMICGSGVYVRSIARDLGIALNCFGHITKLR
TMVGDFRENESVTIEQLTKNNTTYSPPMSSQCLTLGWLCCIALRIVGNAQ"
/product="hypothetical protein"
/besthit="qcoverage 100 , hcoverage 100 , similarity 100
, identity 100 , evalue 1.29e-60 , alnlength 94 ,
Bacteria , Proteobacteria , WP_041573534.1 hypothetical
protein [Wolbachia endosymbiont of Drosophila simulans]"
gene 1467..1634
/locus_tag="wEsol_00073"
CDS 1467..1634
/locus_tag="wEsol_00073"
/codon_start=1
/transl_table=11
/fullproduct="qcoverage 100 , hcoverage 100 , similarity
100 , identity 100 , evalue 4.62e-30 , alnlength 55 ,
Bacteria , Proteobacteria , CDR78442.1 hypothetical
protein WPAU_0043 [Wolbachia endosymbiont of Drosophila
simulans wAu]"
/translation="MANESNEWAKNEFGDAVLGDKRLTDRLVKIADSLISLPESINE
ACGSWSEAKAA"
/product="hypothetical protein"
/besthit="qcoverage 100 , hcoverage 100 , similarity 100
, identity 100 , evalue 4.62e-30 , alnlength 55 ,
Bacteria , Proteobacteria , CDR78442.1 hypothetical
protein WPAU_0043 [Wolbachia endosymbiont of Drosophila
simulans wAu]"
gene 1943..2266
/locus_tag="wEsol_00074"

```

CDS 1943..2266  
 /locus\_tag="wEsol\_00074"  
 /codon\_start=1  
 /transl\_table=11  
 /fullproduct="qcoverage 100 , hcoverage 100 , similarity 100 , identity 100 , evalue 5.96e-72 , alnlength 107 , Bacteria , Proteobacteria , CDR78441.1 Transposase for transposon Tn5 [Wolbachia endosymbiont of Drosophila simulans wAu]"  
 /translation="MKWLES LKKTNNIIDL AQTEAITVCDREADMH DFFELAHNLNSA ILVRARHNRNVNKKFMHTRNKQKLWSFIQGLPCAGKVEVEIPARDNKQKR TAFLEIRF GKFIT"  
 /product="Transposase for transposon Tn5"  
 /besthit="qcoverage 100 , hcoverage 100 , similarity 100 , identity 100 , evalue 5.96e-72 , alnlength 107 , Bacteria , Proteobacteria , CDR78441.1 Transposase for transposon Tn5 [Wolbachia endosymbiont of Drosophila simulans wAu]"

gene 2441..2716  
 /locus\_tag="wEsol\_00075"

CDS 2441..2716  
 /locus\_tag="wEsol\_00075"  
 /codon\_start=1  
 /transl\_table=11  
 /fullproduct="qcoverage 100 , hcoverage 100 , similarity 97.8 , identity 97.8 , evalue 6.78e-57 , alnlength 91 , Bacteria , Proteobacteria , CDR78440.1 hypothetical protein WPAU\_0041 [Wolbachia endosymbiont of Drosophila simulans wAu]"  
 /translation="MRWKIEILHKILKSGLKVEECRLGTAERLMRYLTVMSIIAWRIF FITSIARTNPTLPCTALLAE EEWKVLYVKIHRKPCSNIAPTIKEAVS"  
 /product="hypothetical protein"  
 /besthit="qcoverage 100 , hcoverage 100 , similarity 97.8 , identity 97.8 , evalue 6.78e-57 , alnlength 91 , Bacteria , Proteobacteria , CDR78440.1 hypothetical protein WPAU\_0041 [Wolbachia endosymbiont of Drosophila simulans wAu]"

gene complement(2764..3054)  
 /locus\_tag="wEsol\_00076"

CDS complement(2764..3054)  
 /locus\_tag="wEsol\_00076"  
 /codon\_start=1  
 /transl\_table=11  
 /fullproduct="qcoverage 100 , hcoverage 100 , similarity 97.9 , identity 95.8 , evalue 3.40e-57 , alnlength 96 , Bacteria , Proteobacteria , RLT63249.1 putative transposase [Wolbachia endosymbiont of Drosophila ananassae]"  
 /translation="MEHGRCWRCRK RKSSKLPEGVTPDTFGPRVKSI IAAALSGFYKNS KREVASIINDIFNLNISVGSISNLTITHKYE VREQVA ILLLDQRNVSTLSKE"  
 /product="putative transposase"  
 /besthit="qcoverage 100 , hcoverage 100 , similarity 97.9 , identity 95.8 , evalue 3.40e-57 , alnlength 96 , Bacteria , Proteobacteria , RLT63249.1 putative transposase [Wolbachia endosymbiont of Drosophila ananassae]"

gene complement(3011..3439)  
 /locus\_tag="wEsol\_00077"

CDS complement(3011..3439)  
 /locus\_tag="wEsol\_00077"

```

/codon_start=1
/transl_table=11
/pfam="Pfam-B_3816 DUF972 Pfam-B_4504 Pfam-B_3314 DivIC
HALZ Pfam-B_1653 Pfam-B_3883 Pfam-B_17409"
/fullproduct="qcoverage 100 , hcoverage 100 , similarity
99.3 , identity 98.6 , evalue 6.00e-75 , alnlength 142 ,
Bacteria , Proteobacteria , QEF50519.1 putative
transposase [Wolbachia endosymbiont of Drosophila
ananassae]"
/translation="MVNLLLELCKNLQQKIEKLKAEIENLKAENKALKIENAEELKERLG
LNSKNSSLPSSKELYKTKKDKPKSERNVGDQVGYKGNFATMEADKVVKIELPNICEC
GGELVICEKPYVHQVDLPEIRPYVVIGTWSLLEMQKKKK"
/product="putative transposase"
/besthit="qcoverage 100 , hcoverage 100 , similarity 99.3
, identity 98.6 , evalue 6.00e-75 , alnlength 142 ,
Bacteria , Proteobacteria , QEF50519.1 putative
transposase [Wolbachia endosymbiont of Drosophila
ananassae]"

```

# ORIGIN

```

1  tgtttatggc taaagattac acgaatgttg caattacaaa agcgtttcta ctaggagggt
61  gtcattccag tgcttgacac tgggatggct ttgttgcata gcaactgaaa aaatctgggt
121 gctactgaca aaattcatta taaaatagcc atttaacctt gaaagaaaaa atatgccaca
181 aaaaatgagg gtcagtaacc atagcgaata taacaaattht ctagaaaaaa gaggaaatat
241 ttttcattat atcaacgaag ccatagaaaa gtggtacgag aatggtccaa aaataccagg
301 tggcaacaat atttatagcg ataaagtgtg aatttttggtg cacataataa cttgtttatt
361 tagaataggc ctgaggcaaa cagttgggtt tatagcagga taccttgagc aaattgggaa
421 aaatttgcaa gttatcagct attcacaatc atcaagaagg ttaagaacac tcaatattaa
481 gatcaatgat tgcagaaaat aatatggaag acatcgaaat tgctatagac agtacaggaa
541 ttagtatata caacaacact cctggtcata gcaaaagaaa tagcgaagat agaaagtatc
601 gcagctatga acagacaaga aaattgcatg taatgttgaa tacaacacgc aaaaagcca
661 tagctgtaaa atacagtaac ggctgatcac tatggagcct gtgatttgct aaaagaagtc
721 gattttcagt atgtcataaa agtactatat gcagataggg catatgacag agaaaagctc
781 tataagctgt gtaatcaata tgggtataaaa acgaaaattc ctccgaaaaa caacgcagca
841 gagcatccaa agtttagacta tatggctgag agaaattctg cagtcaagct cataaagtca
901 tatgatgaag atgggtataaa gaagtggaaa aaagagatga gttatggaaa aagatccttat
961 atagaaagtt ttttctcgcg actgaaacaa acattcgggt ttagtttttag gaataaatct
1021 gagacaaata gagagaagga actacttggt aaatgctatt tgctcaataa gttcactgat
1081 attggtatgg cttaaatttga gatagcttca taaatttatt gtgcgttacc tactatccga
1141 agagcgatgc aacaaagcca tcccagtgct aagcactggg atgacatcgg agagtaagtt
1201 gttgtgtttt ttttagtaag ttgctcaatt gtcactgatt cattttctct aaagtcacct
1261 accatagttc ttcttaattht tgtaatgtgt ccaaaacaat ttaatgcaat tccaagatca
1321 cgagcaattg atcttacata tacaccacta ccgcatatca tagaaaaatt tgcactatta
1381 tttatcttac tattaccac aaatataaat gtacttataa ataaagtatt acaatattaa
1441 agtttgcaaa tattgagggt ataaaaatgg caaacgagag taatgaatgg gctaaaaatg
1501 aatttgagaa tgctgtactt ggagataaaa gattaactga ccgattagta aagattgctg
1561 atagtttgat aagtttacct gaaagctcaa ttaatgaggc atgcggaagt tggtcagaag
1621 caaaagcagc ataacgtttt tttcaaaatg agaacgtaaa agaagtcgat attctagctt
1681 cacacattga taaaacagtt gaaagaacaa aagctcataa agaattctt gtgattcaag
1741 atacaactta tttttcatac tcaagccata agcggattgg gaactattgc tggaaaagga
1801 gcagtaatgc atacagccct tgctgttagt acggaagctg ggaataactg atcaaaagat
1861 ttactcgagg caactcattt ctgaagaaga aaaaagacta aagagccatc gtaacaacgt
1921 tcatattgag gataaagaaa gtatgaaatg gctagaaaagt ttaaagaaaa caaataatat
1981 tatagatctg gcccaaaccg aagctataac tgtatgtgac agagaagcag atatgcatga
2041 tttttttgaa cttgcacata atcttaactc agcaatttta gtaagagctc gccacaacag
2101 aatgtaaat aaaaaattca tgcataccag gaacaagcaa aaattatggc catttatcca
2161 aggcctccct tgcgctggaa aagtagaagt tgaaatccct gctagagata acaagcaaaa
2221 aaggacagcg ttttttagaaa ttagattcgg aaaatttatc acatgaaggc catataaaat
2281 gtaaagaagg tcacataaaa tataaacgga cagagtctac aacttcacgc aattcatgtht
2341 gttgaaaaaa actctcctcc cgaagcaagt cctctagagt ggatgctttt ttccggtcag
2401 tacttttgaa gaagctgttg aaaaagttag ttggtattgt ttgagatgga aaatagagat

```

```

2461 attgcataag attttaaaat ctggtctcaa agttgaggaa tgtagacttg gaacagcaga
2521 aagattaatg aggtatttaa cagtcattgag cattattgct tggagaattt tctttattac
2581 atcaattgca agaactaacc caacattacc atgtactgcc ttattagctg aggaagaatg
2641 gaaagtttta tatgttaaaa tacacaggaa accatgttca aatatagccc ctactataaa
2701 agaagccgtt tCGTgaactt ggaggtcatt tagcaagaaa aagcgaccca aaaccaggac
2761 caattactct ttggaaaggg tggagacgtt tctttgatct agaagaagga tggcgacttg
2821 ctcacgaacc tcatatttgt gggtaatagt aagatttgat atgctgccaa cacttatgtt
2881 caaattaaaa atgtcattta tgatactagc cacttcacgc tttgagtttt tgtaaaatcc
2941 gctgagtgtc gcaattatag acttaaccct tggaccaa atgtatctggcg taacaccttc
3001 tggtaacttg ctactttttc tttttctgca tctccaacaa cgaccatgtt ccaattacta
3061 cataaggcct aatttccgga agatcaactt tttggtgaac ataaggtttt tCGcatatta
3121 caagctctcc tccgcattcg caaatattag gcaactctat ttttactact ttatccgctt
3181 ccattgtggc atgaaaattt cttttatacc caacctgatc gccaacattc ctttcgcttt
3241 ttggcttgct cttttttgtt ttgtacaatt ctttagagct cggtagagat gaattttctg
3301 agtttaaacc aagcctttcc tttaattcag cgttctctat ctttaaagct ttattttctg
3361 cttttaagtt ttctatctct gctttcagtt tttctatttt ttgctgtaaa tttttgcaa
3421 gttctaaaag gtttaccaca ttacctcact tttgctctat gattatcttt ttagatcact
3481 ttgtctacct tattctacca ctccgctgaa cggatacaat ttacta

```

//

```

LOCUS      JAQZAU010000005      1489 bp      dna      linear      ENV 17-MAR-2023
DEFINITION MAG: Wolbachia pipientis isolate wEsol contig_11580, whole genome
            shotgun sequence.
ACCESSION  JAQZAU010000005 JAQZAU010000000
VERSION    JAQZAU010000005.1
DBLINK     BioProject: PRJNA929258
            BioSample: SAMN33142973
KEYWORDS   WGS; ENV; Metagenome Assembled Genome; MAG.
SOURCE     Wolbachia pipientis (insect metagenome)
ORGANISM   Wolbachia pipientis
            Bacteria; Pseudomonadota; Alphaproteobacteria; Rickettsiales;
            Anaplasmataceae; Wolbachieae; Wolbachia.
REFERENCE  1 (bases 1 to 1489)
AUTHORS    Fiutek,N., Couger,B.M., Roy,S., de la Torre,J.R. and Connor,E.F.
TITLE      Genomic assessment of the contribution of the Wolbachia
            endosymbiont of Eurosta solidaginis to gall-induction
JOURNAL    International Journal Molecular Sciences
REFERENCE  2 (bases 1 to 1489)
AUTHORS    Fiutek,N., Couger,B.M., Roy,S., de la Torre,J.R. and Connor,E.F.
TITLE      Direct Submission
JOURNAL    Submitted (10-FEB-2023) Biology, San Francisco State University,
            1600 Holloway Ave, San Francisco, CA 94132, USA
COMMENT    ##Genome-Assembly-Data-START##
            Assembly Date      :: JUN-2019
            Assembly Method    :: FLYE v. 06-2019
            Genome Representation :: Full
            Expected Final Version :: Yes
            Genome Coverage     :: 100.0x
            Sequencing Technology :: Illumina HiSeq; PacBio Sequel
            ##Genome-Assembly-Data-END##
FEATURES   Location/Qualifiers
            source              1..1489
                                /organism="Wolbachia pipientis"
                                /mol_type="genomic DNA"
                                /submitter_seqid="contig_11580"
                                /isolate="wEsol"
                                /isolation_source="galls on Solidago altissima"
                                /host="Eurosta solidaginis MN-2018-EFC"
                                /db_xref="taxon:955"
                                /environmental_sample
                                /country="USA: Cowling Arboretum, Carleton College,

```

Northfield, MN"  
 /lat\_lon="44.48 N 93.13 W"  
 /altitude="280 m"  
 /collection\_date="2018-11"  
 /metagenome\_source="insect metagenome"  
 /note="metagenomic"

gene complement(23..364)  
 /locus\_tag="wEsol\_00078"

CDS complement(23..364)  
 /locus\_tag="wEsol\_00078"  
 /codon\_start=1  
 /transl\_table=11  
 /fullproduct="qcoverage 100 , hcoverage 100 , similarity 100 , identity 100 , evalue 1.53e-79 , alnlength 113 , Bacteria , Proteobacteria , AAS13810.1 transposase, IS5 family, OrfB [Wolbachia endosymbiont of Drosophila melanogaster]"  
 /cog="COG3293 COG3293 124 Transposase and inactivated derivatives"  
 /pfam="DDE\_Tnp\_1\_2 DDE\_Tnp\_1"  
 /product="transposase, IS5 family, OrfB"  
 /translation="MRTKYTKVKMWADMGYQGRNLKNHIKEEYDIDIEIVKRPPCRF  
 WVHKDTPPELLPTREQGFKVQPRRWVVERTFAWVNRNRRLSKEYDLLTTSTENFIYLA  
 MSRVMLKREYA"  
 /besthit="qcoverage 100 , hcoverage 100 , similarity 100 , identity 100 , evalue 1.53e-79 , alnlength 113 , Bacteria , Proteobacteria , AAS13810.1 transposase, IS5 family, OrfB [Wolbachia endosymbiont of Drosophila melanogaster]"

gene complement(475..855)  
 /locus\_tag="wEsol\_00079"

CDS complement(475..855)  
 /locus\_tag="wEsol\_00079"  
 /codon\_start=1  
 /transl\_table=11  
 /fullproduct="qcoverage 100 , hcoverage 100 , similarity 99.2 , identity 99.2 , evalue 3.88e-86 , alnlength 126 , Bacteria , Proteobacteria , AOV87106.1 transposase [Wolbachia endosymbiont of Drosophila incompta]"  
 /cog="COG3293 COG3293 124 Transposase and inactivated derivatives"  
 /pfam="DUF4096"  
 /product="transposase"  
 /translation="MRKKYPTDLSEREWARIEKHFRVSYKKGGRPPKYSKREILEAIF  
 CVLRTGCQWRYLPNDFPLWKTVYEQFRQWKKQGIFEKMNYEITKYSRRKIGRNEQPSA  
 CIVDSQSVKTTEKGGSKAMMEVKK"  
 /besthit="qcoverage 100 , hcoverage 100 , similarity 99.2 , identity 99.2 , evalue 3.88e-86 , alnlength 126 , Bacteria , Proteobacteria , AOV87106.1 transposase [Wolbachia endosymbiont of Drosophila incompta]"

gene 962..>1489  
 /locus\_tag="wEsol\_00080"

CDS 962..>1489  
 /locus\_tag="wEsol\_00080"  
 /codon\_start=1  
 /transl\_table=11  
 /product="hypothetical protein"  
 /pfam="Ank\_2 PAZ\_siRNAbind PAZ\_siRNAbind PAZ\_siRNAbind"  
 /translation="MQQAELSNLLKSVLSAKIISDDSLIYTPLTYAILCKNSKAIEEI  
 LKVS KGNDILKDILNATTTIKYLDGRRATVTPLACAILCGDSIAIEEILKVSKEKDIL

NTTATIKYPDSQKVITYTPLTYAMFWKDSKAIKEILVAAKGNSTLLKDILNTTTTMMKYL  
DREVITYTPLAYVILRR"  
/besthit="qcoverage 93.1818181818182 , hcoverage 25 ,  
similarity 69.5 , identity 68.3 , evaluate 7.05e-07 ,  
alnlength 164 , Bacteria , Proteobacteria ,  
WP\_182366402.1 hypothetical protein [Wolbachia  
pipientis]"

# ORIGIN

```

1 ggttggtccgg aaactagtaa attcaagcat attccctctt taacataacc ctactcatag
61 ctaggtatat gaaattctca gtggatgttg tgagtaaadc atactccttc gatagccttc
121 tattcctatt aaccaagca aaagtccttt ctacaacca tcttcttggt tgtactttaa
181 acccttggtc tcttggtgtg agtagctcag gtggcgtatc tttgtgcacc caaaatctac
241 atggaggcct ttaacaatt tcaatatcta tgcataatc ttcctttatg tgattcttta
301 aatttcttcc ttggtatccc atgtcagccc acattttttt aacttttagta tattttgttc
361 tcatattggt taatgctatt ttaataccat ctctatcatt ttcgtttagca ggcgctacgt
421 aacaacctag tataaaaccc tgagtgtctg taattatatg cctttttcta ccctttactt
481 ttttacttcc atcatagcct ttgatccccc cttttctgta gtctttacag attgactatc
541 tactatacag gcactcggct gctcattcct tcctattttt cttctactat attttgtaat
601 ttcataatcc attttctcaa aaattccctg cttcttccat tgcctgaact gctcatacac
661 agtcttccat agcggaaaat catttggttaa ataccgccat tgacaccctg tacgcaatac
721 acagaaaatt gcttctaata tttctctttt gctatacttt ggcggccttc ctcttttctt
781 gtatgatact ctgaagtgtt tttctattct tgcccattcc ctttcgctta gatctgttgg
841 atactttttt ctcatcttta ccccgacta aaatttcaga tattatagcc ttttacttat
901 ttccggacaa cctcttactc atgctatatt ttgcgagaat agtcaagctg taaaggatat
961 tttgcaacaa gccgaattaa gcaacctttt aaagagtgtt cttagtgcaa aaataattag
1021 tgatgattca ttaatttaca caccacttac ttatgccata ttatgtaaaa atagcaaagc
1081 tattgaagaa attttaaaag tctctaaagg aaacgatatt ctgaaagata ttcttaacgc
1141 aacaacaact ataaaatatc tagatggctg gagagcaact gttacaccac ttgcttgtgc
1201 tatactatgt ggagatagta tagctattga agaaatttta aaagtctcta aggagaaaga
1261 tattcttaac acaacagcaa ctataaaata tccagatagc cagaaagtga cttacacacc
1321 acttacttat gctatgttct ggaaggatag caaagctatt aaagaaattc tagtagcagc
1381 taaagggaac agtactcttc tgaaagatat tcttaacaca acaacaacta tgaaatatct
1441 agaccgggaa gtgacttaca caccacttgc ttatgttata ctacgtaga

```

//

LOCUS JAQZAU010000006 911 bp dna linear ENV 17-MAR-2023  
DEFINITION MAG: Wolbachia pipientis isolate wEsol contig\_12340, whole genome  
shotgun sequence.  
ACCESSION JAQZAU010000006 JAQZAU010000000  
VERSION JAQZAU010000006.1  
DBLINK BioProject: PRJNA929258  
BioSample: SAMN33142973  
KEYWORDS WGS; ENV; Metagenome Assembled Genome; MAG.  
SOURCE Wolbachia pipientis (insect metagenome)  
ORGANISM Wolbachia pipientis  
Bacteria; Pseudomonadota; Alphaproteobacteria; Rickettsiales;  
Anaplasmataceae; Wolbachieae; Wolbachia.  
REFERENCE 1 (bases 1 to 911)  
AUTHORS Fiutek,N., Couger,B.M., Roy,S., de la Torre,J.R. and Connor,E.F.  
TITLE Genomic assessment of the contribution of the Wolbachia  
endosymbiont of Eurosta solidaginis to gall-induction  
JOURNAL International Journal Molecular Sciences  
REFERENCE 2 (bases 1 to 911)  
AUTHORS Fiutek,N., Couger,B.M., Roy,S., de la Torre,J.R. and Connor,E.F.  
TITLE Direct Submission  
JOURNAL Submitted (10-FEB-2023) Biology, San Francisco State University,  
1600 Holloway Ave, San Francisco, CA 94132, USA  
COMMENT ##Genome-Assembly-Data-START##  
Assembly Date :: JUN-2019  
Assembly Method :: FLYE v. 06-2019  
Genome Representation :: Full

Expected Final Version :: Yes  
Genome Coverage :: 100.0x  
Sequencing Technology :: Illumina HiSeq; PacBio Sequel  
##Genome-Assembly-Data-END##

```
FEATURES             Location/Qualifiers
     source            1..911
                        /organism="Wolbachia pipientis"
                        /mol_type="genomic DNA"
                        /submitter_seqid="contig_12340"
                        /isolate="wEsol"
                        /isolation_source="galls on Solidago altissima"
                        /host="Eurosta solidaginis MN-2018-EFC"
                        /db_xref="taxon:955"
                        /environmental_sample
                        /country="USA: Cowling Arboretum, Carleton College,
                        Northfield, MN"
                        /lat_lon="44.48 N 93.13 W"
                        /altitude="280 m"
                        /collection_date="2018-11"
                        /metagenome_source="insect metagenome"
                        /note="metagenomic"
     gene              complement(74..256)
                        /locus_tag="wEsol_00081"
     CDS                complement(74..256)
                        /locus_tag="wEsol_00081"
                        /codon_start=1
                        /transl_table=11
                        /product="putative transposase"
                        /translation="MLKGLHVDVGCTKIRTPPELLPTREQGFKVQPRRWVVERTFAWVN
                        RNRRLSKEYDLLHNIH"
     gene              complement(204..362)
                        /locus_tag="wEsol_00082"
     CDS                complement(204..362)
                        /locus_tag="wEsol_00082"
                        /codon_start=1
                        /transl_table=11
                        /product="hypothetical protein"
                        /translation="MRTKYTKVKKMWADMGYQGRNLKNHIKEEYDIDIEIVKRPPCRF
                        WVHKDTHT"
                        /besthit="qcoverage 96.1538461538462 , hcoverage
                        73.5294117647059 , similarity 100 , identity 100 , evaluate
                        1.69e-31 , alnlength 50 , Bacteria , Proteobacteria ,
                        EAL57896.1 transposase, IS5 family, OrfB, partial
                        [Wolbachia endosymbiont of Drosophila ananassae]"
     gene              complement(473..610)
                        /locus_tag="wEsol_00083"
     CDS                complement(473..610)
                        /locus_tag="wEsol_00083"
                        /codon_start=1
                        /transl_table=11
                        /fullproduct="qcoverage 100 , hcoverage 81.8181818181818
                        , similarity 100 , identity 100 , evaluate 3.71e-22 ,
                        alnlength 45 , Bacteria , Proteobacteria , EAL58108.1
                        transposase, IS5 family, OrfA, partial [Wolbachia
                        endosymbiont of Drosophila ananassae]"
                        /translation="MNYEITKYSRRKIGRNEQPSACIVDSQSVKTTTEKGGSKAMMEVK
                        K"
                        /product="transposase, IS5 family, OrfA, partial"
                        /besthit="qcoverage 100 , hcoverage 81.8181818181818 ,
                        similarity 100 , identity 100 , evaluate 3.71e-22 ,
```

alnlength 45 , Bacteria , Proteobacteria , EAL58108.1  
 transposase, IS5 family, OrfA, partial [Wolbachia  
 endosymbiont of Drosophila ananassae]"  
 gene complement(607..852)  
 /locus\_tag="wEsol\_00084"  
 CDS complement(607..852)  
 /locus\_tag="wEsol\_00084"  
 /codon\_start=1  
 /transl\_table=11  
 /product="hypothetical protein"  
 /pfam="DUF4096"  
 /translation="MRKKYPTDLSEREWARIEKHFRVSYKKGGRRPPKYSKREILEQFS  
 MYCVQGVNGGIYQMIFRYGRLCMSSSGNGRSREFLRK"  
 /besthit="qcoverage 50.6172839506173 , hcoverage  
 80.3921568627451 , similarity 100 , identity 100 , evaluate  
 1.76e-20 , alnlength 41 , Bacteria , Proteobacteria ,  
 WP\_038198919.1 transposase, partial [Wolbachia  
 pipientis]"  
 gene 834..>911  
 /locus\_tag="wEsol\_00085"  
 CDS 834..>911  
 /locus\_tag="wEsol\_00085"  
 /codon\_start=1  
 /transl\_table=11  
 /product="hypothetical protein"  
 /translation="MDTFFSSLPRTKISDIIAFYLFPDNS"

#### ORIGIN

```

1 tccggaaact agtaaattca agcatattcc ctctttaaca taaccctaac tcatagctag
61 gtatatgaaa ttctcagtgg atgttggtgaa gtaaatcata ctccttcgat agccttctat
121 tcctattaac ccaagcaaaa gtccttttcta caacccatct tcttggtgtg actttaaaacc
181 cttgttctct tgttggtagt agctcaggtg tgcgtatctt tgtgcaccca aaatctacat
241 ggaggccttt taacaatttc aatatctatg tcatattctt cttttatgtg attctttaa
301 tttcttcctt ggtatcccat gtcagcccac atttttttaa ctttagtata ttttgttctc
361 atattgttta atgctatttt aataccatct ctatcatttt cgtttagcagc gcctacgtaa
421 caacctagta taaaaccctg agtgtctgta attatatgcc tttttctacc ctttactttt
481 ttacttccat catagccttt gatccccctt tttctgtagt ctttacagat tgactatcta
541 ctatacaggc actcggctgc tcattccttc ctatttttct tctactatat tttgtaattt
601 cataattcat tttctcaaaa attccctgct tcttccattg cctgaactgc tcatacacag
661 tcttccatag cggaaaatca tttggtaaat accgccattg acaccctgta cgcaatacat
721 agaaaattgc tctaataattt ctcttttgct atactttggc ggccttcctc ctttcttgta
781 tgatactctg aagtgttttt ctattcttgc ccattccctt tcgcttagat ctgttgata
841 cttttttctc atctttaccc cgtactaaaa ttccagatat tatagccttt tacttatttc
901 cggacaactc t

```

//

LOCUS JAQZAU010000007 1277 bp dna linear ENV 17-MAR-2023  
 DEFINITION MAG: Wolbachia pipientis isolate wEsol contig\_12505, whole genome  
 shotgun sequence.  
 ACCESSION JAQZAU010000007 JAQZAU010000000  
 VERSION JAQZAU010000007.1  
 DBLINK BioProject: PRJNA929258  
 BioSample: SAMN33142973  
 KEYWORDS WGS; ENV; Metagenome Assembled Genome; MAG.  
 SOURCE Wolbachia pipientis (insect metagenome)  
 ORGANISM Wolbachia pipientis  
 Bacteria; Pseudomonadota; Alphaproteobacteria; Rickettsiales;  
 Anaplasmataceae; Wolbachieae; Wolbachia.  
 REFERENCE 1 (bases 1 to 1277)  
 AUTHORS Fiutek,N., Couger,B.M., Roy,S., de la Torre,J.R. and Connor,E.F.  
 TITLE Genomic assessment of the contribution of the Wolbachia  
 endosymbiont of Eurosta solidaginis to gall-induction

JOURNAL International Journal Molecular Sciences  
 REFERENCE 2 (bases 1 to 1277)  
 AUTHORS Fiutek,N., Couger,B.M., Roy,S., de la Torre,J.R. and Connor,E.F.  
 TITLE Direct Submission  
 JOURNAL Submitted (10-FEB-2023) Biology, San Francisco State University,  
 1600 Holloway Ave, San Francisco, CA 94132, USA  
 COMMENT ##Genome-Assembly-Data-START##  
 Assembly Date :: JUN-2019  
 Assembly Method :: FLYE v. 06-2019  
 Genome Representation :: Full  
 Expected Final Version :: Yes  
 Genome Coverage :: 100.0x  
 Sequencing Technology :: Illumina HiSeq; PacBio Sequel  
 ##Genome-Assembly-Data-END##  
 FEATURES Location/Qualifiers  
 source 1..1277  
 /organism="Wolbachia pipientis"  
 /mol\_type="genomic DNA"  
 /submitter\_seqid="contig\_12505"  
 /isolate="wEsol"  
 /isolation\_source="galls on Solidago altissima"  
 /host="Eurosta solidaginis MN-2018-EFC"  
 /db\_xref="taxon:955"  
 /environmental\_sample  
 /country="USA: Cowling Arboretum, Carleton College,  
 Northfield, MN"  
 /lat\_lon="44.48 N 93.13 W"  
 /altitude="280 m"  
 /collection\_date="2018-11"  
 /metagenome\_source="insect metagenome"  
 /note="metagenomic"  
 gene <1..110  
 /locus\_tag="wEsol\_00086"  
 CDS <1..110  
 /locus\_tag="wEsol\_00086"  
 /codon\_start=1  
 /transl\_table=11  
 /product="hypothetical protein"  
 /translation="XRSQQLSIDLTQQKSGEKVWNVFYKKNDASNCSGMQ"  
 gene complement(111..275)  
 /locus\_tag="wEsol\_00087"  
 CDS complement(111..275)  
 /locus\_tag="wEsol\_00087"  
 /codon\_start=1  
 /transl\_table=11  
 /fullproduct="qcoverage 100 , hcoverage 100 , similarity  
 100 , identity 100 , evalue 2.14e-30 , alnlength 54 ,  
 Bacteria , Proteobacteria , WP\_010082072.1 MULTISPECIES:  
 IS3 family transposase [Wolbachia]"  
 /cog="Tra5 COG2801 232 Transposase and inactivated  
 derivatives"  
 /pfam="rve\_3 rve\_2"  
 /product="IS3 family transposase"  
 /translation="MSNKGCCYDNSVAESFFSSLKREILIDTSQHSAQQTRTAIFEYI  
 EIFYNKQRHY"  
 /besthit="qcoverage 100 , hcoverage 100 , similarity 100  
 , identity 100 , evalue 2.14e-30 , alnlength 54 ,  
 Bacteria , Proteobacteria , WP\_010082072.1 MULTISPECIES:  
 IS3 family transposase [Wolbachia]"  
 gene complement(272..442)

```

CDS      /locus_tag="wEsol_00088"
         complement(272..442)
         /locus_tag="wEsol_00088"
         /codon_start=1
         /transl_table=11
         /fullproduct="qcoverage 87.5 , hcoverage 96.078431372549
         , similarity 89.8 , identity 83.7 , evaluate 3.55e-18 ,
         alnlength 49 , Bacteria , Proteobacteria , MBA8756266.1
         hypothetical protein [Wolbachia pipientis]"
         /translation="MVVMTYDAINKQLVMNSLLMDVNKRKPAKNLLHSDQGSQYTLL
         RVSISLSCKEYR"
         /product="hypothetical protein"
         /besthit="qcoverage 87.5 , hcoverage 96.078431372549 ,
         similarity 89.8 , identity 83.7 , evaluate 3.55e-18 ,
         alnlength 49 , Bacteria , Proteobacteria , MBA8756266.1
         hypothetical protein [Wolbachia pipientis]"
gene     complement(873..1052)
         /locus_tag="wEsol_00089"
CDS      complement(873..1052)
         /locus_tag="wEsol_00089"
         /codon_start=1
         /transl_table=11
         /product="hypothetical protein"
         /translation="MHFQVDGNMAPYDKERLQFNKQEITRERDIYKRKPSASTKKELK
         YFYIILVTAISTGIM"
gene     complement(1182..>1277)
         /locus_tag="wEsol_00090"
CDS      complement(1182..>1277)
         /locus_tag="wEsol_00090"
         /codon_start=1
         /transl_table=11
         /product="hypothetical protein"
         /translation="EERKEFFLGKINFGGLEMVREYTRRIQIGSC"

```

# ORIGIN

```

1  agagaagtgg acagttgtca attgacctta cccagcaaaa aagtggagag aaagtgtgga
61 atgtttttta caaaaagaat gatgcatcaa attgttcttg aatgcaatag ttaatagtga
121 cgttgtttgt tataaaaaat ttctatgtat tcaaatattg cagttctagt ttgttgagca
181 gagtgtttgt aagtatcaat aagtatttct cttttcaatg agctaaagaa gctttctgca
241 acagaattgt cgtaacaaca gcctttatta ctcatctata ttctttacag ctaagagata
301 ttgataccct tagcaaagta tattgtgaac cttgatcact atgtaatagt agatttttgg
361 caggtttacg cttgttaacg tccattaata aagagttcat aaccaattgt ttattttattg
421 catcatacgt cattactacc atacgtggag catatataga cttaaagccaa atcatagcca
481 tcaagaaaaa ccctccttag gtttttagatg tagataataa aaccataact ttattttattt
541 ggttgatcga aacaataaaag tattttgtgat ctagtagatt gggagtctac agacatctat
601 tatctgtttg ttgtttttta aaattttaaa cttttcttct cagtatagtc cctgatgttc
661 attttctgca tataataactt tgcaccgttt tcaaatattg atgcaacttt tacccaaagc
721 tcaattcagc atgaatttta gggagctcca tatctacatt taaatagctt ggatatattt
781 tttgaatata tgctaataata cgtcttttat ttgctgattc ctactgcttt atttttctgt
841 ggtccactta gagtagccac tagcagaaaa tcctacataa ttctgtact tatagcagtt
901 actaatatat aataaaaaata ttttaactct tttttgtac tggccgaggg ctttctttta
961 taaatgtctc tttcccttgt tatctcttgc ttgttaaatt gtaacctctc tttgtcgtaa
1021 ggagccatgt taccatctac ctggaaatgc atctgctgcc gacttttttt tccgttgtgt
1081 ttctttatcc attttcctaa taaaccacc tttattccta aatcttcttg ctatttttgt
1141 aattgtttgt gacctgcctt ttctttgtca tgttgtccag tttaacagct tccaatttga
1201 attctgcgcg tatattctct taccatttct aatcctccaa aattttattt acccaaaaaa
1261 aactcttttc tttcctc

```

//

```

LOCUS      JAQZAU010000008          5990 bp    dna        linear    ENV 17-MAR-2023
DEFINITION MAG: Wolbachia pipientis isolate wEsol contig_12536, whole genome
            shotgun sequence.

```

ACCESSION JAQZAU010000008 JAQZAU010000000  
 VERSION JAQZAU010000008.1  
 DBLINK BioProject: PRJNA929258  
 BioSample: SAMN33142973  
 KEYWORDS WGS; ENV; Metagenome Assembled Genome; MAG.  
 SOURCE Wolbachia pipientis (insect metagenome)  
 ORGANISM Wolbachia pipientis  
 Bacteria; Pseudomonadota; Alphaproteobacteria; Rickettsiales;  
 Anaplasmataceae; Wolbachieae; Wolbachia.  
 REFERENCE 1 (bases 1 to 5990)  
 AUTHORS Fiutek,N., Couger,B.M., Roy,S., de la Torre,J.R. and Connor,E.F.  
 TITLE Genomic assessment of the contribution of the Wolbachia  
 endosymbiont of Eurosta solidaginis to gall-induction  
 JOURNAL International Journal Molecular Sciences  
 REFERENCE 2 (bases 1 to 5990)  
 AUTHORS Fiutek,N., Couger,B.M., Roy,S., de la Torre,J.R. and Connor,E.F.  
 TITLE Direct Submission  
 JOURNAL Submitted (10-FEB-2023) Biology, San Francisco State University,  
 1600 Holloway Ave, San Francisco, CA 94132, USA  
 COMMENT ##Genome-Assembly-Data-START##  
 Assembly Date :: JUN-2019  
 Assembly Method :: FLYE v. 06-2019  
 Genome Representation :: Full  
 Expected Final Version :: Yes  
 Genome Coverage :: 100.0x  
 Sequencing Technology :: Illumina HiSeq; PacBio Sequel  
 ##Genome-Assembly-Data-END##  
 FEATURES Location/Qualifiers  
 source 1..5990  
 /organism="Wolbachia pipientis"  
 /mol\_type="genomic DNA"  
 /submitter\_seqid="contig\_12536"  
 /isolate="wEsol"  
 /isolation\_source="galls on Solidago altissima"  
 /host="Eurosta solidaginis MN-2018-EFC"  
 /db\_xref="taxon:955"  
 /environmental\_sample  
 /country="USA: Cowling Arboretum, Carleton College,  
 Northfield, MN"  
 /lat\_lon="44.48 N 93.13 W"  
 /altitude="280 m"  
 /collection\_date="2018-11"  
 /metagenome\_source="insect metagenome"  
 /note="metagenomic"  
 gene complement(<1..256)  
 /locus\_tag="wEsol\_00091"  
 CDS complement(<1..256)  
 /locus\_tag="wEsol\_00091"  
 /codon\_start=1  
 /transl\_table=11  
 /fullproduct="qcoverage 100 , hcoverage 100 , similarity  
 100 , identity 100 , eval 2.25e-59 , alnlength 85 ,  
 Bacteria , Proteobacteria , WP\_044471356.1 IS5 family  
 transposase, partial [Wolbachia endosymbiont of  
 Drosophila suzukii]"  
 /cog="COG3293 COG3293 124 Transposase and inactivated  
 derivatives"  
 /pfam="DUF4096"  
 /product="IS5 family transposase, partial"  
 /translation="MRKKYPTDLSEREWARIKHFVSYKKGGRRPPKYSKREILEAIF

YVLRTGCQWRYLPNDFPLWKTVYEQFRQWKKQGIFEKMNYE"  
 /besthit="qcoverage 100 , hcoverage 100 , similarity 100  
 , identity 100 , evaluate 2.25e-59 , alnlength 85 ,  
 Bacteria , Proteobacteria , WP\_044471356.1 IS5 family  
 transposase, partial [Wolbachia endosymbiont of  
 Drosophila suzukii]"

gene 339..1859  
 /locus\_tag="wEsol\_00092"

CDS 339..1859  
 /locus\_tag="wEsol\_00092"  
 /codon\_start=1  
 /transl\_table=11  
 /fullproduct="qcoverage 100 , hcoverage 100 , similarity  
 100 , identity 100 , evaluate 0.0 , alnlength 506 ,  
 Bacteria , Proteobacteria , WP\_174516815.1 MULTISPECIES:  
 HlyD family type I secretion periplasmic adaptor subunit  
 [Wolbachia]"  
 /cog="AcrA COG0845 372 Membrane-fusion protein"  
 /pfam="HlyD\_2 HlyD Biotin\_lipoyl\_2 Biotin\_lipoyl  
 Pfam-B\_12304 HlyD\_3"  
 /tigr="TIGR01843 type\_I\_hlyD 422 type I secretion  
 membrane fusion protein, HlyD family"  
 /product="HlyD family type I  
 secretion periplasmic adaptor subunit"  
 /translation="MISKLKKLSAGFSLTGLIGHGDNINMQGAKNKKKKYPKFLDKTF  
 ALIDAVINFILKRESNNVNEVLKVTWGPLFFGLVILIFFGIGGIWSAIAPIDGAVHA  
 SGEVIVSSNRKIVQHLGGGIISKILVKEGQAVKKDEPLVLLSDVNEKANLSIIKEKLL  
 SFLATEARLLAIRVDLDTLEFPDEVKKLSHDELVNKAIKNQVKLFNSQRKSILGKTDI  
 LQQRIKQLNDELAGLNFQLNAAHKQYDLITEELETKRQLLDSGHISKPHILALEKQFA  
 EIEGRVGHYRSAISQVQQKIGENELEIINVRNDSQERANAELKEVSTSIADLKERLMV  
 AEDSLARTIIKSPQDGIVTDIRYHTEGGVVIQSGVPIMSVVPSDDDLIIDAKIQTRNIE  
 EILSAQKKDSNIVSIDGLEGLKVKVRLSAYSARRLSLINGIVSNISPDALDDPRLGRY  
 YSVRVVIPKPELAQFKNVLYLPGMPAEVYIVTQSRTLLSFLFTPIIATVDRSFIER"  
 /besthit="qcoverage 100 , hcoverage 100 , similarity 100  
 , identity 100 , evaluate 0.0 , alnlength 506 , Bacteria ,  
 Proteobacteria , WP\_174516815.1 MULTISPECIES: HlyD family  
 type I secretion periplasmic adaptor subunit [Wolbachia]"

gene 2002..2244  
 /locus\_tag="wEsol\_00093"

CDS 2002..2244  
 /locus\_tag="wEsol\_00093"  
 /codon\_start=1  
 /transl\_table=11  
 /fullproduct="qcoverage 100 , hcoverage 100 , similarity  
 100 , identity 100 , evaluate 4.41e-48 , alnlength 80 ,  
 Bacteria , Proteobacteria , WP\_155968338.1 transposase  
 [Wolbachia pipientis]"  
 /cog="COG2963 COG2963 116 Transposase and inactivated  
 derivatives"  
 /pfam="HTH\_Tnp\_1 HTH\_23 HTH\_28"  
 /product="transposase"  
 /translation="MAREYTAEFKLEAVKLANEQRKAGQTITKIAKDLGIKGGLLGKW  
 IKKHNEKKSAANAFPDVAPYDKERFDLQKELEVVRK"  
 /besthit="qcoverage 100 , hcoverage 100 , similarity 100  
 , identity 100 , evaluate 4.41e-48 , alnlength 80 ,  
 Bacteria , Proteobacteria , WP\_155968338.1 transposase  
 [Wolbachia pipientis]"

gene 2318..2698  
 /locus\_tag="wEsol\_00094"

CDS 2318..2698

```

/locus_tag="wEsol_00094"
/codon_start=1
/transl_table=11
/fullproduct="qcoverage 100 , hcoverage 100 , similarity
100 , identity 100 , evalue 1.16e-87 , alnlength 126 ,
Bacteria , Proteobacteria , AOV87106.1 transposase
[Wolbachia endosymbiont of Drosophila incompta]"
/cog="COG3293 COG3293 124 Transposase and inactivated
derivatives"
/pfam="DUF4096"
/product="transposase"
/translation="MRKKYPTDLSEREWARIEKHFRVSYKKGGRPPKYSKREILEAIF
YVLRGTGCQWRYLPNDFPLWKTIVYEQFRQWKKQGIFEKMNIEITKYSRRKIGRNEQPSA
CIVDSQSVKTTTEKGGSKAMMEVKK"
/besthit="qcoverage 100 , hcoverage 100 , similarity 100
, identity 100 , evalue 1.16e-87 , alnlength 126 ,
Bacteria , Proteobacteria , AOV87106.1 transposase
[Wolbachia endosymbiont of Drosophila incompta]"
gene 2809..3150
/locus_tag="wEsol_00095"
CDS 2809..3150
/locus_tag="wEsol_00095"
/codon_start=1
/transl_table=11
/fullproduct="qcoverage 100 , hcoverage 100 , similarity
100 , identity 100 , evalue 1.53e-79 , alnlength 113 ,
Bacteria , Proteobacteria , AAS13810.1 transposase, IS5
family, OrfB [Wolbachia endosymbiont of Drosophila
melanogaster]"
/cog="COG3293 COG3293 124 Transposase and inactivated
derivatives"
/pfam="DDE_Tnp_1_2 DDE_Tnp_1"
/product="transposase, IS5 family, OrfB"
/translation="MRTKYTKVKKMWADMGYQGRNLKNHIKEEYDIDIEIVKRPPCRF
WVHKDTPPELLPTREQGFKVQPRRWVVERTFAWVNRNRRLSKEYDLLTTSTENFIYLA
MSRVMLKREYA"
/besthit="qcoverage 100 , hcoverage 100 , similarity 100
, identity 100 , evalue 1.53e-79 , alnlength 113 ,
Bacteria , Proteobacteria , AAS13810.1 transposase, IS5
family, OrfB [Wolbachia endosymbiont of Drosophila
melanogaster]"
gene 3197..3703
/locus_tag="wEsol_00096"
CDS 3197..3703
/locus_tag="wEsol_00096"
/codon_start=1
/transl_table=11
/product="hypothetical protein"
/pfam="DnaJ"
/translation="MARNVLNENEYHALKQLFLTFNIQKEDVVNSDIKNKKLSQQY
RKLSLKYHSDKNPNNKEAEKFKVIALNKPFFEEFIIEPLEKGLNKRNNLIKELRGKL
WSRSYEELQKYLDDKCRNKLYNKQQSINNNTAYVKYSSYSNLLGVLLVSFTSIAFLI
INGINYVF"
/besthit="qcoverage 98.2142857142857 , hcoverage
47.5504322766571 , similarity 100 , identity 99.4 ,
evalue 2.50e-103 , alnlength 165 , Bacteria ,
Proteobacteria , QVU15912.1 DnaJ domain protein
[Wolbachia endosymbiont of Drosophila yakuba]"
gene complement(3887..4408)
/locus_tag="wEsol_00097"

```

CDS complement(3887..4408)  
 /locus\_tag="wEsol\_00097"  
 /codon\_start=1  
 /transl\_table=11  
 /fullproduct="qcoverage 100 , hcoverage 100 , similarity 100 , identity 100 , evalue 4.69e-112 , alnlength 173 , Bacteria , Proteobacteria , RLT59977.1 transposase IS116/IS110/IS902 family protein [Wolbachia endosymbiont of Drosophila ananassae]"  
 /cog="COG3547 COG3547 303 Transposase and inactivated derivatives"  
 /pfam="Transposase\_20"  
 /product="transposase IS116/IS110/IS902 family protein"  
 /translation="MRTQEKCRLEAPENDHIKESCQKTIEFFDSQINELNDTIQKIID  
 ESRELQQRQKILKTVPGIGKKLSQDFLCMPPELGYNRKEVASLAGVAPHPKESGKAV  
 GYRRITGGRSNVRSKLFTAAMAATRSKSLGAFYSKLVESGKKKMVAITALMRKIIVI  
 ANTRLKEAINLHT"  
 /besthit="qcoverage 100 , hcoverage 100 , similarity 100 , identity 100 , evalue 4.69e-112 , alnlength 173 , Bacteria , Proteobacteria , RLT59977.1 transposase IS116/IS110/IS902 family protein [Wolbachia endosymbiont of Drosophila ananassae]"

gene 4738..4845  
 /locus\_tag="wEsol\_00098"

CDS 4738..4845  
 /locus\_tag="wEsol\_00098"  
 /codon\_start=1  
 /transl\_table=11  
 /product="hypothetical protein"  
 /pfam="HTH\_Tnp\_IS630"  
 /translation="MAYSVDLRERAVSMIEKGKSKVEVAELLEIGIATL"  
 /besthit="qcoverage 100 , hcoverage 52.2388059701493 , similarity 100 , identity 100 , evalue 3.26e-13 , alnlength 35 , Bacteria , Proteobacteria , WP\_213863574.1 IS630 transposase-related protein, partial [Wolbachia endosymbiont of Ceratitidis capitata]"

gene 5285..5596  
 /locus\_tag="wEsol\_00099"

CDS 5285..5596  
 /locus\_tag="wEsol\_00099"  
 /codon\_start=1  
 /transl\_table=11  
 /fullproduct="qcoverage 100 , hcoverage 100 , similarity 100 , identity 100 , evalue 1.60e-74 , alnlength 103 , Bacteria , Proteobacteria , WP\_155968470.1 transposase [Wolbachia pipientis]"  
 /cog="COG3335 COG3335 132 Transposase and inactivated derivatives"  
 /pfam="DDE\_3 DDE\_1"  
 /product="transposase"  
 /translation="MTFKGGCDKEVFNTWLEKMLLPKLPHGTTIVMDNATFHKTPKTK  
 ELIDNARCRLLYLPTYSPDLNPIEHCWNTIKSRLRPLMHKYTDLQLLVGNTIMEIYHS  
 F"  
 /besthit="qcoverage 100 , hcoverage 100 , similarity 100 , identity 100 , evalue 1.60e-74 , alnlength 103 , Bacteria , Proteobacteria , WP\_155968470.1 transposase [Wolbachia pipientis]"

gene complement(5517..5747)  
 /locus\_tag="wEsol\_00100"

CDS complement(5517..5747)

```

/locus_tag="wEsol_00100"
/codon_start=1
/transl_table=11
/product="hypothetical protein"
/pfam="DEDD_Tnp_IS110 Pfam-B_8792"
/translation="MVTSYQNFIGIDIGKFKNVVAIHQKNAVEFDNNASGWQQLFQE
FSDIVFSKMNDKFPLWYYQPKVVSLEYIYALKV"
/besthit="qcoverage 64.4736842105263 , hcoverage
59.0361445783133 , similarity 100 , identity 98.0 ,
evaluate 7.61e-26 , alnlength 49 , Bacteria ,
Proteobacteria , WP_213863621.1 transposase, partial
[Wolbachia endosymbiont of Ceratitis capitata]"

```

# ORIGIN

```

1  tttcataatt cattttctca aaaattccct gcttcttcca ttgcctgaac tgctcataca
61  cagtcttcca tagcggaaaa tcatttggtg aataccgcca ttgacaccct gtacgcaata
121 catagaaaat tgcttctaata atttctcttt tgctataact tggcggcctt cctcctttct
181 tgtatgatac tctgaagtgt ttttctattc ttgccatttc cttttcgctt agatctgttg
241 gatacttttt tctcatcttt acccgtact aaaatttcag atattatagc cttttactta
301 tttccggaca acctctaaca caaattcaca gtagtattat gataagtaag ttaaaaaagc
361 ttagcgctgg attttctttg acaggcttga ttggccatgg tgataatata aatatgcaag
421 gagcaaaaaa taaaaagaag aagtacccaa aatttttggg taagacgttt gcattgattg
481 atgcagtgat aaattttatt ttaaaacgcg aaagtaataa cgtaaataaa gtcctgaaag
541 taacatgggg accactatth tttggtctgg tagtaatact catctttttt gggataggtg
601 gtatttggtc ggctatagct ccaattgacg gtgcggtgca tgcaagtggg gaagttattg
661 tatcttcaaa tagaaaaata gttcaacact tgggcggagg aataataagc aaaattttag
721 taaaagaggg tcaagcagtt aaaaaagatg agcctctagt tttgttgagt gatgttaacg
781 agaaggcgaa ttaagtatc atcaaagaga agctcttatc atttttagca acagaagcaa
841 ggcttcttgc aatcagagta gatttggaac cgctcgagtt tcctgatgag gttaaaaaat
901 tatctcacga tgaacttgta aataaagcga taaagaatca agtaaagttg ttcaactctc
961 agagaaagag catattggga aaaacagaca tactgcaaca acgtataaag cagttaaatg
1021 atgaattagc ggggctaaac tttcaactaa atgcagctca taagcaatat gacttgataa
1081 ctgaggagtt ggaaacaaaa agacaattac ttgatagtgg ccatataagc aaaccacaca
1141 ttttagcttt agaaaagcag tttgctgaaa ttgaaggcag agttggacat taccgttctg
1201 caatatctca agtgcagcaa aaaattggag agaacgaatt agaaattata aacgtgagaa
1261 atgattctca agaaagagca aacgctgaac ttaaggaagt tagtacgtct attgcagact
1321 tgaaagagag actgatggtt gctgaagatt cattagcacg tacaataatt aaatcgcttc
1381 aagatgggat agtcacagat ataagatacc atactgaagg tgggtgttata caatctggag
1441 ttccgatcat gagcgtagtg ccatcggtat atgacctaat aatagatgct aaaattcaga
1501 ccagaaacat agaagagata ctgtcagcac aaaagaaaga tagcaacata gtctctattg
1561 atgggctaga agggctaaag gttaaagtgc gtttaagtgc ttacagtgca cgtcgtttaa
1621 gtttaattaa tgggtatagta agcaatattt ctcccgatgc ctttgatgat ccaaggctag
1681 ggcgttatta ttcagtagct gtagtgatac caaaaccaga gcttgctcag tttaaaaacg
1741 tatacctata ccctgggtat ccagcagaag tgtacatagt tactcaatct cgtactcttt
1801 tatcattctt gtttacgcct ataattgcaa cagtcgatag gtctttttata gaaaggtagc
1861 tctactgtta aagtagtagt gaaagtgcg taataaaaatt taggtacata attagacaat
1921 aggcttcttg accttaccga gaaaaagtgg agagaaagaa aggagttttt tcgggtaaaa
1981 taaaattttg gaggattaga aatggcaaga gaataacgg cagaattcaa attggaagct
2041 gttaagctgg caaatgaaca aagaaaggca ggtcaaaaca ttacaaaaat agcaaaggat
2101 ttaggaataa aggggtggtt attaggaaaa tggataaaga aacacaacga aaaaaagtca
2161 gcggcaaatg catttccaga tgtagcacct tatgacaaag agagattttg tttacagaaa
2221 gagttagagg ttgtccggaa ataagtaaaa ggctataaga ggttggtccg aaataagtaa
2281 aaggctataa tatctgaaat tttagtacgg ggtaaagatg agaaaaaagt atccaacaga
2341 tctaagcgaa agggaatggg caagaataga aaaacacttc agagtatcat acaagaaagg
2401 aggaaggccg ccaaagtata gcaaaagaga aatattagaa gcaattttct atgtattgct
2461 tacagggtgt caatggcggt atttaccaaa tgattttccg ctatggaaga ctgtgtatga
2521 gcagttcagg caatggaaga agcagggaat ttttgagaaa atgaattatg aaattacaaa
2581 atatagtaga agaaaaatag gaaggaatga gcagccgagt gcctgtatag tagatagtca
2641 atctgtaaag actacagaaa aggggggatc aaaggctatg atggaagtaa aaaagtaaag
2701 ggtagaaaaa ggcataataa tacagacact cagggtttta tactaggttg ttacgtaggc
2761 gctgctaacg aaaatgatag agatggtatt aaaatagcat taaacaatat gagaacaaaa

```

```

2821 tataactaaag ttaaaaaaat gtgggctgac atgggatacc aaggaagaaa tttaaagaat
2881 cacataaagg aagaatatga catagatat gaaattgtta aaaggcctcc atgtagattt
2941 tgggtgcaca aagatacgcc acctgagcta ctaccaacaa gagaacaagg gtttaaagta
3001 cagccaagaa gatgggttgt agaaaggact tttgcttggg ttaataggaa tagaaggcta
3061 tcgaaggagt atgatttact cacaacatcc actgagaatt tcatatacct agctatgagt
3121 agggttatgt taaagaggga atatgcttga atttactagt ttccggacaa cctcttagtt
3181 aatttgtagg tgtaatgtgg ctagaaatgt tttgaatgaa aatgagtacc acgctttaaa
3241 gcagttgttt ttaacattta atattcaaaa ggaggatgtg gtaaattctg acattaagaa
3301 tattaagaaa aagcttagtc aacaataccg taaattatcg ttaaaatata actcagataa
3361 aaacccaaac aataaagaag cggaggagaa atttaagggt attgcattaa ataagccatt
3421 ttttgaagaa tttataatag agccattgga gaaaggcttc aataaaagaa ataatttaat
3481 aaaagaatta cgcggtaagt tgtggagtcg cagttatgaa gaattgcaaa aatacttaga
3541 tgataagtgc agaaataaac tctataataa gcagcagtca attaacaata atgtaactgc
3601 ttatgtaaaa tattcttctt attcaaactc cttaggagtt ctttttagtat ccttcacatc
3661 aattgcattt ttaataatta atggtatcaa ctatgttttt taaaaatttt tttatttgtg
3721 taattttgca aattatatgg gcaataaaaa cccgtttgtc atagaaatag aattttatat
3781 caaacagcta ccacagcaat ttctgcttaa gctaataaat atgtgcttta agtctgtgtg
3841 gacgcacata ttcattagcc aatttcagtt accgttgtga agatttttaa gtatgcaaat
3901 taattgcttc ttttaagtct gtattagcaa ttactataat tttacgcatt agggctgtta
3961 tagccaccat cttcttctta ccactttcaa caagcttaga ataaaaggcg ccaagtatag
4021 atttcgacct tgtagcagcc atagcggctg taaagagctt tgaacgaacg ttacttctac
4081 cacctgtaat ccttcggtaa ccaacagctt taccactttc ttttggtatg ggtgcaactc
4141 cggcaagact tgctacttct tttctgttta agtaaccaag ctctggcatt aaacacaaaa
4201 aatcttgtga taacttttta cctattccag gaactgtttt aagaattttt tggcgttgtt
4261 gtaattcgcg gctttcatca ataacttttt gtatagtatc attgagttcg tttatttgac
4321 tatcgaaaaa ctcaatggtc ttttgacagc tttcttttat atgatcattt tccggtgctt
4381 caagtctgca tttttcttga gttctcattt gcgtaatatc atcacgacgt tgacaaagtg
4441 cagccaaagt tgattgttct gtagaggtag gtacaaatag agagatagtt ctatggcggt
4501 caaatccata ttgagcaaga gctcttgcac ctagactttg ctaaagttcc gtgagataaa
4561 ataaagcttt ttactttacg agtattagct cgatgcacgg caatatTTTT gtcggtgaaga
4621 aaatgtgata agccaagctc atatttccct gtattttcta aagtcactaa agcattaggt
4681 agaatatagt acttcccaaa gtaaatgata aagggtataat aagctatttg agttataatg
4741 gcgtatagtg tggattttaag ggaaagggca gtatcgatga tagaaaaagg gaagtcaaag
4801 gttgaggtgg cagagctttt ggagatagga atagcaactc tgtagcgctg gttaagaaag
4861 aaagccgctg gtgaaagcct aaggccatcg aaaaacggca gctttattcg aaaaatagac
4921 caaaaaatac tcgaagaata tgttaaaaaa aatccagatc atacgctggc agagatgaaa
4981 caaaatcttg gatttggaat aaattcaatt tggatataggc tgaaacagct aagaattact
5041 ttaaaaaaaa gttacactat atcaagagcg caatcaagaa gataggcagc gatttaccga
5101 taaaatctca aaaatagacc attccagcat cttatatata gatgaagcag gagttgataa
5161 taggttatac cgagagtatg gacgtgctcc aataggaaaag aaaatttatg cagatatattc
5221 aggaagaaaa cgagagagaa tcagtataat aggcgggtgg attggaaaga gatttattgc
5281 accaatgact ttcaaagggt ggtgtgacaa agagggtattc aatacatggt tagagaagat
5341 gttattacct aaattgccac atggtactac aatagttatg gacaatgcca cattccataa
5401 aactcccaaa acaaaggagt taatagataa tgctagatgc cgtttgctct atctaccaac
5461 atattcacca gatttgaacc ctatagagca ttgttggaat accatcaaaa gccgcctcag
5521 acctttaatg cataaatata cagacttaca acttttggtt ggtaatacca taatggaaat
5581 ttatcattca ttttagaaaa tactatatct gaaaactctt gaaataattg ttgccaacca
5641 gaagcattat tatcaaattc gacagcatte ttctgtttgt gaattgcaac gacattttta
5701 aattttccga tgtcaatgcc aataaaaatt tgataagatg taaccataat aaacctcgat
5761 agtttttagt aatttaagat tgtaaacggg tgcataatata tgtcccaagc aactattcaa
5821 acgtatcgag agatagggct agcgtacctt gataccaacg gttgtaatac caatttcctt
5881 tcggtcgcgc acgcccgcgt ttcctagtga gcagggttat ctttctctct tatctctttt
5941 atatcacgtt ttttaacttac aatttcttct aatgtaccaa tagcagtagg

```

//

```

LOCUS      JAQZAU010000009      1297 bp      dna      linear      ENV 17-MAR-2023
DEFINITION MAG: Wolbachia pipientis isolate wEsol contig_13076, whole genome
            shotgun sequence.
ACCESSION  JAQZAU010000009 JAQZAU010000000
VERSION    JAQZAU010000009.1
DBLINK     BioProject: PRJNA929258

```

BioSample: SAMN33142973

KEYWORDS WGS; ENV; Metagenome Assembled Genome; MAG.

SOURCE Wolbachia pipientis (insect metagenome)

ORGANISM Wolbachia pipientis  
Bacteria; Pseudomonadota; Alphaproteobacteria; Rickettsiales;  
Anaplasmataceae; Wolbachieae; Wolbachia.

REFERENCE 1 (bases 1 to 1297)

AUTHORS Fiutek,N., Couger,B.M., Roy,S., de la Torre,J.R. and Connor,E.F.

TITLE Genomic assessment of the contribution of the Wolbachia endosymbiont of Eurosta solidaginis to gall-induction

JOURNAL International Journal Molecular Sciences

REFERENCE 2 (bases 1 to 1297)

AUTHORS Fiutek,N., Couger,B.M., Roy,S., de la Torre,J.R. and Connor,E.F.

TITLE Direct Submission

JOURNAL Submitted (10-FEB-2023) Biology, San Francisco State University, 1600 Holloway Ave, San Francisco, CA 94132, USA

COMMENT ##Genome-Assembly-Data-START##  
Assembly Date :: JUN-2019  
Assembly Method :: FLYE v. 06-2019  
Genome Representation :: Full  
Expected Final Version :: Yes  
Genome Coverage :: 100.0x  
Sequencing Technology :: Illumina HiSeq; PacBio Sequel  
##Genome-Assembly-Data-END##

FEATURES Location/Qualifiers

source 1.1297  
/organism="Wolbachia pipientis"  
/mol\_type="genomic DNA"  
/submitter\_seqid="contig\_13076"  
/isolate="wEsol"  
/isolation\_source="galls on Solidago altissima"  
/host="Eurosta solidaginis MN-2018-EFC"  
/db\_xref="taxon:955"  
/environmental\_sample  
/country="USA: Cowling Arboretum, Carleton College, Northfield, MN"  
/lat\_lon="44.48 N 93.13 W"  
/altitude="280 m"  
/collection\_date="2018-11"  
/metagenome\_source="insect metagenome"  
/note="metagenomic"

gene complement(95..337)  
/locus\_tag="wEsol\_00101"

CDS complement(95..337)  
/locus\_tag="wEsol\_00101"  
/codon\_start=1  
/transl\_table=11  
/product="hypothetical protein"  
/translation="MPHGTTIVMDNATFHKTPKTKELIDNARCRLLYLPTYSPDLNPI  
EHCWNTIKSRLRPLMHKYTDLQLLVGNTIMEIYHSF"

gene complement(374..715)  
/locus\_tag="wEsol\_00102"

CDS complement(374..715)  
/locus\_tag="wEsol\_00102"  
/codon\_start=1  
/transl\_table=11  
/fullproduct="qcoverage 100 , hcoverage 100 , similarity 100 , identity 100 , eval 1.53e-79 , alnlength 113 , Bacteria , Proteobacteria , AAS13810.1 transposase, IS5 family, OrfB [Wolbachia endosymbiont of Drosophila

```

melanogaster]"
/cog="COG3293 COG3293 124 Transposase and inactivated
derivatives"
/pfam="DDE_Tnp_1_2 DDE_Tnp_1"
/product="transposase, IS5 family, OrfB"
/translation="MRTKYTKVKKMWADMGYQGRNLKNHIKEEYDIDIEIVKRPPCRF
WVHKDTPPELLPTREQGFKVQPRRWVVERTFAWVNRNRRLSKEYDLLTTSTENFIYLA
MSRVMLKREYA"
/besthit="qcoverage 100 , hcoverage 100 , similarity 100
, identity 100 , evalue 1.53e-79 , alnlength 113 ,
Bacteria , Proteobacteria , AAS13810.1 transposase, IS5
family, OrfB [Wolbachia endosymbiont of Drosophila
melanogaster]"
gene complement(826..1206)
/locus_tag="wEsol_00103"
CDS complement(826..1206)
/locus_tag="wEsol_00103"
/codon_start=1
/transl_table=11
/fullproduct="qcoverage 100 , hcoverage 100 , similarity
99.2 , identity 99.2 , evalue 3.88e-86 , alnlength 126 ,
Bacteria , Proteobacteria , AOV87106.1 transposase
[Wolbachia endosymbiont of Drosophila incompta]"
/cog="COG3293 COG3293 124 Transposase and inactivated
derivatives"
/pfam="DUF4096"
/product="transposase"
/translation="MRKKYPTDLSEREWARIEKHFRVSYKKGGRPPKYSKREILEAIF
CVLRTGCQWRYLPNDFPLWKTVYEQFRQWKKQGIFEKMNYEITKYSRRKIGRNEQPSA
CIVDSQSVKTTEKGGSKAMMEVKK"
/besthit="qcoverage 100 , hcoverage 100 , similarity 99.2
, identity 99.2 , evalue 3.88e-86 , alnlength 126 ,
Bacteria , Proteobacteria , AOV87106.1 transposase
[Wolbachia endosymbiont of Drosophila incompta]"

```

# ORIGIN

```

1  tgaccttacc cagaaaaagt ggagagaaaag tttggaatgt ttttcacaaa gagaatgatg
61  aatcaaaatg ctcaggaatg caatatagta ttttctaaaa tgaatgataa atttccatta
121 tggtattacc aacccaaaagt tgtaagtctg tatattttatg cattaaagggt ctgaggcggc
181 ttttgatggt attccaacaa tgctctatag ggttcaaadc tggtgaatat gttggttagat
241 agagcaaacg gcatctagca ttatctatta actcctttgt tttgggaggt ttatggaatg
301 tggcattgtc cataactatt gtagtaccat gtggcaattt aggtaataag aggttgtccg
361 gaaactagta aattcaagca tattccctct ttaacataac cctactcata gctagggtata
421 tgaaattctc agtggatggt gtgagtaaat catactcctt cgatagcctt ctattcctat
481 taaccaagc aaaagtcctt tctacaaccc atcttcttgg ctgtacttta aacccttggt
541 ctcttggttg tagtagctca ggtggcgtat ctttgtgcac ccaaaatcta catggaggcc
601 ttttaacaat ttcaatatct atgtcatatt ctccctttat gtgattcttt aaatttcttc
661 cttggtatcc catgtcagcc cacatthttt taacttttagt atattttggt ctcataattgt
721 ttaatgctat ttttaatacca tctctatcat tttcgtagc agcgccctacg taacaaccta
781 gtataaaacc ctgagtggtc gtaattatat gcctttttct accctttact tttttacttc
841 catcatagcc tttgatcccc ctttttctgt agtctttaca gattgactat ctactataca
901 ggcactcggc tgctcattcc ttcctattht tcttctacta tattttgtaa tttcataatt
961 catttttctc aaaattccct gcttcttcca ttgcctgaac tgctcataca cagtcttcca
1021 tagcggaata tcatttggtg aataccgcca ttgacaccct gtacgcaata cacagaaaat
1081 tgcttctaata atttctcttt tgctataact tggcggcctt cctcctttct tgtatgatac
1141 tctgaagtgt ttttctattc ttgcccattc cttttcgctt agatctgttg gatacttttt
1201 tctcatcttt accccgtact aaaatttcag atattatagc cttttactta tttccggaca
1261 acctcttata gccttttact tatttccgga caatctc

```

//

```

LOCUS      JAQZAU010000010      1378 bp      dna      linear      ENV 17-MAR-2023
DEFINITION MAG: Wolbachia pipientis isolate wEsol contig_14176, whole genome

```

shotgun sequence.

ACCESSION JAQZAU010000010 JAQZAU010000000

VERSION JAQZAU010000010.1

DBLINK BioProject: PRJNA929258  
BioSample: SAMN33142973

KEYWORDS WGS; ENV; Metagenome Assembled Genome; MAG.

SOURCE Wolbachia pipientis (insect metagenome)

ORGANISM Wolbachia pipientis  
Bacteria; Pseudomonadota; Alphaproteobacteria; Rickettsiales;  
Anaplasmataceae; Wolbachieae; Wolbachia.

REFERENCE 1 (bases 1 to 1378)

AUTHORS Fiutek,N., Couger,B.M., Roy,S., de la Torre,J.R. and Connor,E.F.

TITLE Genomic assessment of the contribution of the Wolbachia  
endosymbiont of Eurosta solidaginis to gall-induction

JOURNAL International Journal Molecular Sciences

REFERENCE 2 (bases 1 to 1378)

AUTHORS Fiutek,N., Couger,B.M., Roy,S., de la Torre,J.R. and Connor,E.F.

TITLE Direct Submission

JOURNAL Submitted (10-FEB-2023) Biology, San Francisco State University,  
1600 Holloway Ave, San Francisco, CA 94132, USA

COMMENT ##Genome-Assembly-Data-START##  
Assembly Date :: JUN-2019  
Assembly Method :: FLYE v. 06-2019  
Genome Representation :: Full  
Expected Final Version :: Yes  
Genome Coverage :: 100.0x  
Sequencing Technology :: Illumina HiSeq; PacBio Sequel  
##Genome-Assembly-Data-END##

FEATURES Location/Qualifiers

source 1..1378  
/organism="Wolbachia pipientis"  
/mol\_type="genomic DNA"  
/submitter\_seqid="contig\_14176"  
/isolate="wEsol"  
/isolation\_source="galls on Solidago altissima"  
/host="Eurosta solidaginis MN-2018-EFC"  
/db\_xref="taxon:955"  
/environmental\_sample  
/country="USA: Cowling Arboretum, Carleton College,  
Northfield, MN"  
/lat\_lon="44.48 N 93.13 W"  
/altitude="280 m"  
/collection\_date="2018-11"  
/metagenome\_source="insect metagenome"  
/note="metagenomic"

gene 59..439  
/locus\_tag="wEsol\_00104"

CDS 59..439  
/locus\_tag="wEsol\_00104"  
/codon\_start=1  
/transl\_table=11  
/fullproduct="qcoverage 100 , hcoverage 100 , similarity  
100 , identity 100 , eval 1.16e-87 , alnlength 126 ,  
Bacteria , Proteobacteria , AOV87106.1 transposase  
[Wolbachia endosymbiont of Drosophila incompta]"  
/cog="COG3293 COG3293 124 Transposase and inactivated  
derivatives"  
/pfam="DUF4096"  
/product="transposase"  
/translation="MRKKYPTDLSEREWARIKHFVRSYKKGGRRPPKYSKREILEAIF

YVLRTGCQWRYLPNDFPLWKTVYEQFRQWKKQGIFEKMNYEITKYSRRKIGRNEQPSA  
CIVDSQSVKTTEKGGSKAMMEVKK"  
/besthit="qcoverage 100 , hcoverage 100 , similarity 100  
, identity 100 , evalue 1.16e-87 , alnlength 126 ,  
Bacteria , Proteobacteria , AOV87106.1 transposase  
[Wolbachia endosymbiont of Drosophila incompta]"  
gene 550..891  
/locus\_tag="wEsol\_00105"  
CDS 550..891  
/locus\_tag="wEsol\_00105"  
/codon\_start=1  
/transl\_table=11  
/fullproduct="qcoverage 100 , hcoverage 100 , similarity  
100 , identity 100 , evalue 1.53e-79 , alnlength 113 ,  
Bacteria , Proteobacteria , AAS13810.1 transposase, IS5  
family, OrfB [Wolbachia endosymbiont of Drosophila  
melanogaster]"  
/cog="COG3293 COG3293 124 Transposase and inactivated  
derivatives"  
/pfam="DDE\_Tnp\_1\_2 DDE\_Tnp\_1"  
/product="transposase, IS5 family, OrfB"  
/translation="MRTKYTKVKMWADMGYQGRNLKNHIKEEYDIDIEIVKRPPCRF  
WVHKDTPPELLPTREQGFKVQPRRWVVERTFAWVNRNRRLSKEYDLLTTSTENFIYLA  
MSRVMLKREYA"  
/besthit="qcoverage 100 , hcoverage 100 , similarity 100  
, identity 100 , evalue 1.53e-79 , alnlength 113 ,  
Bacteria , Proteobacteria , AAS13810.1 transposase, IS5  
family, OrfB [Wolbachia endosymbiont of Drosophila  
melanogaster]"  
gene complement(1133..>1378)  
/locus\_tag="wEsol\_00106"  
CDS complement(1133..>1378)  
/locus\_tag="wEsol\_00106"  
/codon\_start=1  
/transl\_table=11  
/product="hypothetical protein"  
/translation="YFLRLENVLLSVQGGMSEQAAIDQLSPPLFFKQLQSFKSHLKS  
LQLSELKKILEKLISLEVTCKKTDLDHKMFQHALTGS"  
/cog="HolA COG1466 334 DNA polymerase III, delta subunit"  
/besthit="qcoverage 100 , hcoverage 24.5454545454545 ,  
similarity 100 , identity 100 , evalue 2.43e-44 ,  
alnlength 81 , Bacteria , Proteobacteria , WP\_010082540.1  
MULTISPECIES: DNA polymerase III subunit delta  
[Wolbachia]"

# ORIGIN

```

1 aggttggtccg gaaataagta aaaggctata atatctgaaa ttttagtacg gggtaaagat
61 gagaaaaaag tatccaacag atctaagcga aagggaatgg gcaagaatag aaaaacactt
121 cagagtatca tacaagaaag gaggaaggcc gccaaagtat agcaaaagag aaatattaga
181 agcaattttc tatgtattgc gtacaggggtg tcaatggcgg tatttaccaa atgattttcc
241 gctatggaag actgtgtatg agcagttcag gcaatggaag aagcagggaa tttttgagaa
301 aatgaattat gaaattacaa aatatagtag aagaaaaata ggaaggaatg agcagccgag
361 tgctgtata gtagatagtc aatctgtaaa gactacagaa aaggggggat caaaggctat
421 gatggaagta aaaaagtaaa gggtagaaaa aggcatataa ttacagacac tcagggtttt
481 atactagggt gttacgtagg cgctgctaac gaaaatgata gagatggtat taaaatagca
541 ttaaacaata tgagaacaaa atatactaaa gttaaaaaaaa tgtgggctga catgggatac
601 caaggaagaa atttaaagaa tcacataaag gaagaatatg acatagatat tgaaattggt
661 aaaaggcctc catgtagatt ttgggtgcac aaagatacgc cacctgagct actaccaaca
721 agagaacaag ggtttaaagt acagccaaga agatgggttg tagaaaggac ttttgcttgg
781 gttaatagga atagaaggct atcgaaggag tatgatattac tcacaacatc cactgagaat
841 ttcatatacc tagctatgag taggggttatg ttaaagaggg aatatgcttg aatttactag

```



```

/codon_start=1
/transl_table=11
/fullproduct="qcoverage 100 , hcoverage 83.0508474576271
, similarity 99.2 , identity 98.4 , evaluate 6.72e-166 ,
alnlength 245 , Eukaryota , Arthropoda , GFY80019.1
uncharacterized protein TNIN_56691 [Trichonephila
inaurata madagascariensis]"
/pfam="PDDEXK_2"
/tigr="TIGR01784 T_den_put_tspse 273 conserved
hypothetical protein"
/product="uncharacterized protein"
/translation="MALSKFLDPKNDISFKRIFGTEKNKDILIHFLNDILGFTGKSTI
QDIEFLSTIQDPDIASKKQSIQVLCRDENGLQVIVEMQVAKTKGFEEKRAQYYAAKAY
SRQSDKGDQYHDLKEIIFIAIADCILFPDKSEYKSKHTIRDEDTNEHDLKDFYFIFIE
LPKFPKTKEDQLSSIVEKWVYFFKYADETSEEELEKIIGSDLIKKAYEELNRFNWSE
KEFIAYEQEIKRILDEQAVLAQKLDDA"
/besthit="qcoverage 100 , hcoverage 83.0508474576271 ,
similarity 99.2 , identity 98.4 , evaluate 6.72e-166 ,
alnlength 245 , Eukaryota , Arthropoda , GFY80019.1
uncharacterized protein TNIN_56691 [Trichonephila
inaurata madagascariensis]"
gene 858..1397
/locus_tag="wEsol_00108"
CDS 858..1397
/locus_tag="wEsol_00108"
/codon_start=1
/transl_table=11
/pfam="HTH_37 HTH_31 HTH_19 HTH_3 HTH_26"
/fullproduct="qcoverage 96.6480446927374 , hcoverage
97.1910112359551 , similarity 97.7 , identity 91.9 ,
evaluate 7.03e-103 , alnlength 173 , Bacteria ,
Proteobacteria , WP_146038214.1 MULTISPECIES:
helix-turn-helix domain-containing protein, partial
[unclassified Wolbachia]"
/translation="MANISIRYQIAQKVRNWRLKRGYTQKDLAKKVSVTYQVVLQYEK
GTRKISIEKLYAIAEILSIGIVDLIPVSNEKICLEDEGEIEILNLVRKYKTINDQELRK
VFYLLTKFTRVGEKSSKKAQKVKIAKGMVKAGISVDIVSQAIGLSANECVVEKTGSIY
YQIGKKIKWKRVYSKGF"
/product="helix-turn-helix domain-containing protein,
partial"
/besthit="qcoverage 96.6480446927374 , hcoverage
97.1910112359551 , similarity 97.7 , identity 91.9 ,
evaluate 7.03e-103 , alnlength 173 , Bacteria ,
Proteobacteria , WP_146038214.1 MULTISPECIES:
helix-turn-helix domain-containing protein, partial
[unclassified Wolbachia]"
gene 1402..1752
/locus_tag="wEsol_00109"
CDS 1402..1752
/locus_tag="wEsol_00109"
/codon_start=1
/transl_table=11
/fullproduct="qcoverage 102.586206896552 , hcoverage
90.8396946564885 , similarity 97.5 , identity 95.8 ,
evaluate 2.04e-66 , alnlength 119 , Viruses , Uroviricota ,
QHJ75536.1 putative transcriptional regulator [Wolbachia
phage WO]"
/cog="HipB COG1396 120 Predicted transcriptional
regulators"
/pfam="HTH_19 HTH_26 HTH_3"

```

```

/product="putative transcriptional regulator"
/translation="MDTTRDKISNYEQGRVAIPLEKLYAIAETLSISITDLLIEEDEI
VESELPDLIKEYKKIESQELRYALIKSLFESIQICEEKVKRAEKIKDLVKGISTDII
LQITGLSLGEIQQI"
/besthit="qcoverage 102.586206896552 , hcoverage
90.8396946564885 , similarity 97.5 , identity 95.8 ,
evalue 2.04e-66 , alnlength 119 , Viruses , Uroviricota ,
QHJ75536.1 putative transcriptional regulator [Wolbachia
phage WO]"
gene 1922..2578
/locus_tag="wEsol_00110"
CDS 1922..2578
/locus_tag="wEsol_00110"
/codon_start=1
/transl_table=11
/fullproduct="qcoverage 100 , hcoverage 100 , similarity
100 , identity 100 , evaluate 1.83e-147 , alnlength 218 ,
Bacteria;Viruses , Proteobacteria;Uroviricota ,
WP_006280787.1 MULTISPECIES: DNA repair protein RadC
[Wolbachia]"
/cog="RadC COG2003 224 DNA repair proteins"
/pfam="Pfam-B_8535 RadC Prok-JAB"
/tigr="TIGR00608 radc 218 DNA repair protein RadC"
/product="DNA repair protein RadC"
/translation="MNKSKEEIEFRILESKGKALLDREIMETFLSAVHESPQAQEIAK
NLVNTYTGVGRI LGREMDLKVIEGVTD SAVAMIMCVKETLERVLKEKLKSEPIMDLQ
GIVEYLNVSIGH SERECVKILYLNKRRQLIGEESYIGEMEKAPVYIKEITRKALMKNA
TSIIMSHNHPPGGSLEPSEEDQAVTKSLAAACSTVSVKLFDHIIITSGGYFSFREGLL
"
/besthit="qcoverage 100 , hcoverage 100 , similarity 100
, identity 100 , evaluate 1.83e-147 , alnlength 218 ,
Bacteria;Viruses , Proteobacteria;Uroviricota ,
WP_006280787.1 MULTISPECIES: DNA repair protein RadC
[Wolbachia]"
gene 2679..3863
/locus_tag="wEsol_00111"
CDS 2679..3863
/locus_tag="wEsol_00111"
/codon_start=1
/transl_table=11
/pfam="Pfam-B_5362"
/fullproduct="qcoverage 95.6852791878173 , hcoverage 100
, similarity 99.7 , identity 99.7 , evaluate 5.72e-251 ,
alnlength 377 , Bacteria , Proteobacteria ,
WP_007549714.1 MULTISPECIES: hypothetical protein
[Wolbachia]"
/translation="MTSKDRNKKTNVNHKKIFGALEGVDIKQSKFVSKINNQKEINRE
ASPSRNIRENKINYGKSLDYVYGTKPLNDQAEDLNPFFASNLQIKPSASESEKLSWFK
SAVVETKNVNALHKVIEQVLASGARVNACNDGEWSFAEY MILGTHFHRLEKSDRKKIM
RKLMLSGAEFHD TLLQNK LIG EIYNELQPEVQ PQIDERLEELEKAGESAVQEGELIDV
EIDNTTSYIEFSGNSKVEVAKILRELGSNILKMGNNAVEIRREEGGARNYVDVSDGSS
VVLELPTSLGKLNIVLYQDVKNCSQVQVKVADKEMWAE LQKRGE EIGKNCLFGGVK LK
KVVERGNFTRCGIWSEKQKEVSEKLF SWADKVRENSKETCRALLFINLKVPESGYYIW
SL"
/product="hypothetical protein"
/besthit="qcoverage 95.6852791878173 , hcoverage 100 ,
similarity 99.7 , identity 99.7 , evaluate 5.72e-251 ,
alnlength 377 , Bacteria , Proteobacteria ,
WP_007549714.1 MULTISPECIES: hypothetical protein
[Wolbachia]"

```

gene 3888..>4022  
 /locus\_tag="wEsol\_00112"  
 CDS 3888..>4022  
 /locus\_tag="wEsol\_00112"  
 /codon\_start=1  
 /transl\_table=11  
 /product="hypothetical protein"  
 /pfam="Pfam-B\_12671 HTH\_31 HTH\_19 HTH\_3"  
 /translation="MVL FVEKSLDYKVGEKLSWRLE RGYTQKD LAEKLGVKYWVILQY"  
 /besthit="qcoverage 100 , hcoverage 37.8151260504202 ,  
 similarity 100 , identity 100 , evaluate 6.27e-23 ,  
 alnlength 45 , Bacteria , Proteobacteria , WP\_007549715.1  
 helix-turn-helix domain-containing protein, partial  
 [Wolbachia endosymbiont of Drosophila ananassae]"

# ORIGIN

```

1  gtagcatcat  caagtttttg  agcaaggaca  gcctgttcat  caagaatacg  ttttatttcc
61  tgttcatagg  caataaattc  tttttctgac  cagttgaacc  tatttagttc  ttcataggcc
121  tttttaatta  ttagatcact  acctattatt  ttttccagct  cttcttcact  agtctcatct
181  gcatatttaa  agaagtagac  ccattttctc  acaataactg  aaagctgac  ttctttgggt
241  tttggaaatt  taggcaactc  aataaatata  aagtaaaaat  cttttagatc  atgctcatta
301  gtatcttcat  cgcgaatagt  gtgctttgat  ttgtactcag  acttatcagg  aaataaaaata
361  cagtctgcta  tagcaataaa  gataatttcc  ttaagggtcat  ggtattgatc  acctttatca
421  gactgtcttg  agtaagcttt  agcagcatag  tattgtgcac  gtttttcaaa  gcccttagtt
481  ttagcgacct  gcatttcaac  tatgacttgc  agcccatttt  catctctaca  aagaacatca
541  acaatgcttt  gttttttaga  agcaatatca  gggctctgaa  tagtacttaa  gaactctata
601  tcctgtattg  tacttttgcc  agtgaagcca  aggatatcat  taaggaagtg  aataagaatg
661  tccttatttt  tttcagtacc  aaagatgcmc  ttgaacgata  tatcattctt  gggatcgaga
721  aacttcgaaa  gagccatagg  aaatccactt  aaaaagcatt  aataattata  cataattgtg
781  aagaaatatt  caactaaaat  gcaaacatag  aagtttttgt  atatctttgt  ttggtagtat
841  taacatgtat  aatatttatg  gcaaacatct  caataaggta  tcagatagca  caaaaagtaa
901  ggaactggag  gttaaagcga  ggatatactc  aaaaagattt  agcgaagaaa  gtcagtgtaa
961  cgtatcaagt  agtactacaa  tatgaaaaag  gaacacgtaa  aatttcgatt  gaaaagttgt
1021  atgctatagc  agagatattg  tcgattggta  ttgtagacct  aattcctgta  tcaaatgaaa
1081  aaatctgtct  tgaagatgag  ggagaagaaa  tattaaatct  agtaagaaaa  tataaaacga
1141  ttaatgatca  agagttgcmc  aagggtgttt  acttgctaac  aaaatttacc  cgagttgggt
1201  agaaaagtag  taaaaaagca  gagaaggtaa  aaattgcaaa  gggatatggt  aaagcaggaa
1261  tttctgttga  tattgtttca  caagcaattg  gcctctctgc  taatgagtgt  gttgaagaaa
1321  aaacaggttc  tatctactac  caaataggaa  aaaagataaa  agaatggaag  agagtatact
1381  caaaaggatt  tggctgagaa  aatggatata  acacgtgata  aaataagcaa  ctatgagcaa
1441  ggacgtgtgg  ccattccact  ggaaaaatta  tatgcaatag  cagaaacatt  atcaattagc
1501  attacagatc  tgctcataga  ggaagatgag  atagtagaaa  gtgagctacc  tgatttaata
1561  aaagaatata  aaaaaattga  gagtcaagaa  ttacgctatg  cgctaataaa  atctctgttt
1621  gaaagcatac  aaatttgcmc  ggaaaaagtg  aaaagagcag  aaaagataaa  ggatttagtg
1681  aaaggaggaa  tttctaccga  tattattttg  caaataacag  gcctctcttt  aggcgaaatt
1741  caacagattt  aaaataaaaa  atcagtatat  attaatatct  ttactcttag  atgaaaaaat
1801  aagtaaaaaa  gattgagaaa  ttgatttgac  ttcactcgaa  agctatggct  ttatgccaat
1861  gctgataaaa  aacagcagta  aatatctaaa  aaaagtttgt  tgttagttaa  aggtaaatta
1921  tatgaataaa  agtaagaag  aaatcgaaat  cagaatatta  gaaagcaaa  gcaaagcact
1981  acttgatcgt  gaaataatgg  aaacgtttct  aagtgcagta  catgaaagcc  cacaggctca
2041  agaaattgct  aaaaatttg  tgaatactta  tacaggagta  ggaaggattt  taggtagaga
2101  aatggatgac  ctgaaagtta  tagaaggagt  aactgattct  gcagtagcaa  tgattatgtg
2161  tgtaagga  acactagaaa  gggtagtgaa  agaaaagctt  aagagtgagc  caatcatgga
2221  ctacaagg  atagtagagt  acttaaacgt  aagtataggc  cactcagaaa  gggaaatgtg
2281  aaaaatactg  tacttgaata  aaaggcgtca  actaattgga  gaagaatcct  atattggtga
2341  aatggaaaa  gcaccagtat  acataaagga  aattacaaga  aaggcattaa  tgaaaaatgc
2401  aacatcaata  ataatgtcac  ataaccatcc  tggagggagc  ttagagccat  cagaagaaga
2461  tcaagcagta  acgaagagct  tagcagcagc  atgtagtact  gtaagcgtaa  aattgtttga
2521  ccatattatc  atcacaagtg  gaggtatttt  cagctttcga  gaaaatggat  tgttatagta
2581  gaaagtattt  gcaaatctac  tcattataat  ttataatgag  tagtaagatg  tataaagttt

```

```
//
LOCUS       JAQZAU010000012             11379 bp    dna        linear     ENV 17-MAR-2023
DEFINITION  MAG: Wolbachia pipientis isolate wEsol contig_14687, whole genome
            shotgun sequence.
ACCESSION   JAQZAU010000012  JAQZAU010000000
VERSION     JAQZAU010000012.1
DBLINK      BioProject: PRJNA929258
            BioSample: SAMN33142973
KEYWORDS    WGS; ENV; Metagenome Assembled Genome; MAG.
SOURCE      Wolbachia pipientis (insect metagenome)
  ORGANISM  Wolbachia pipientis
            Bacteria; Pseudomonadota; Alphaproteobacteria; Rickettsiales;
            Anaplasmataceae; Wolbachieae; Wolbachia.
REFERENCE   1  (bases 1 to 11379)
  AUTHORS   Fiutek,N., Couger,B.M., Roy,S., de la Torre,J.R. and Connor,E.F.
  TITLE     Genomic assessment of the contribution of the Wolbachia
            endosymbiont of Eurosta solidaginis to gall-induction
  JOURNAL   International Journal Molecular Sciences
REFERENCE   2  (bases 1 to 11379)
  AUTHORS   Fiutek,N., Couger,B.M., Roy,S., de la Torre,J.R. and Connor,E.F.
  TITLE     Direct Submission
  JOURNAL   Submitted (10-FEB-2023) Biology, San Francisco State University,
            1600 Holloway Ave, San Francisco, CA 94132, USA
COMMENT     ##Genome-Assembly-Data-START##
            Assembly Date           :: JUN-2019
            Assembly Method          :: FLYE v. 06-2019
            Genome Representation     :: Full
            Expected Final Version    :: Yes
            Genome Coverage           :: 100.0x
            Sequencing Technology     :: Illumina HiSeq; PacBio Sequel
            ##Genome-Assembly-Data-END##
FEATURES             Location/Qualifiers
     source            1..11379
                       /organism="Wolbachia pipientis"
                       /mol_type="genomic DNA"
                       /submitter_seqid="contig 14687"
```

```

/isolate="wEsol"
/isolation_source="galls on Solidago altissima"
/host="Eurosta solidaginis MN-2018-EFC"
/db_xref="taxon:955"
/environmental_sample
/country="USA: Cowling Arboretum, Carleton College,
Northfield, MN"
/lat_lon="44.48 N 93.13 W"
/altitude="280 m"
/collection_date="2018-11"
/metagenome_source="insect metagenome"
/note="metagenomic"
gene 438..1910
/locus_tag="wEsol_00113"
CDS 438..1910
/locus_tag="wEsol_00113"
/codon_start=1
/transl_table=11
/fullproduct="qcoverage 100 , hcoverage 100 , similarity
99.6 , identity 99.6 , evalue 0.0 , alnlength 490 ,
Bacteria , Proteobacteria , WP_149168725.1 hypothetical
protein [Wolbachia endosymbiont of Chrysomya
megacephala]"
/translation="MPKSKTKRGTEDLKGNAGPSKRSLSSDPKKNKEIISSKVISKL
KDVVKGDR TSAIEEWVKSHPVTV EGLTVEQSDLLCNAFRDESCW SGATLDVAKLVGEL
AKSGVLNPF AIYKIACIECV ESEIKQLFDKALE SFRSDLSHKGACEEDRNLACSDKLA
RVELLSEFMGRRDPVFNFWIDQESGNLRENIEAEDGFNKAVDLKWSKGVEHFYNRLCSE
EKL VKEEREKLLVSAIAKLSPLQSSYKLASTLNSLLGKVISAKVDHKSLLGLPNKKDR
GVIYRPLSYLVEHGFLCTTKYVIQYLSEGC SRSEVEKMLS PRGYAHL LSSLSFV VVSK
DYDLDNRN EARS A ISSLWESSVF NQNKIN VDPFKDRIA FVAMENA ISNLIVDQENSK
DTQSAGDGEKV DVLVLSILKFAKDCCSDKSFKSLKERIANSLDKTRNSK MIDATSSCNL
IEELCKSARNLNLFSASTEGPQSTLVGTNVSISPAAVVNK"
/product="hypothetical protein"
/besthit="qcoverage 100 , hcoverage 100 , similarity 99.6
, identity 99.6 , evalue 0.0 , alnlength 490 , Bacteria ,
Proteobacteria , WP_149168725.1 hypothetical protein
[Wolbachia endosymbiont of Chrysomya megacephala]"
gene 1919..4009
/locus_tag="wEsol_00114"
CDS 1919..4009
/locus_tag="wEsol_00114"
/codon_start=1
/transl_table=11
/pfam="DUF1703 DUF1703"
/fullproduct="qcoverage 100 , hcoverage 100 , similarity
99.9 , identity 99.9 , evalue 0.0 , alnlength 696 ,
Bacteria , Proteobacteria , WP_006014164.1 MULTISPECIES:
hypothetical protein [Wolbachia]"
/translation="MHGNNEDRELVRALLSGGCDEF SRQFVGFLNNCP SFLHSANKPG
FFPTFFFGMFSTAHDAGILVEDERVYFRFDNYGNLKVAVLTNKENRRIVRCYT VADNE
NSPGSRFS AEEKQQVEENLPQELQEDEDLDWEEYKIFRFGEECRFIHEIDRFPQRDEP
GAPIFHEINPIREQGELL DLMSELANDDTGEVSTNVKRILEYVIDIHDEHEDSLVFRA
ESDYHGFLCGFLVNFYRAVADFYPELLIGKGYADVLLVRGVDQTNDSVP I IIE LKV
GDEEGLEQAKDYAKSCSVSSLPIHTSSPSAVCV ALNFQLRGGAGLR TSVQAFSEGGLS
LIPGLLHPHGNGV RGNV KRFLQPIASEFTQSPHCNTFSCTSS FVFGNVLSTRDLETN
DGREVRVT KYLFNHSQGEKMKRTGGRGDAADIVSHALT LALFLSNIGFFVLHIFRRLK
WQTL PDKALNLSLLPQATDDAKVRQVLCEVDVQGHLEVASAKKFESLRAYSRS HSEGY
FEGRFSEQMGNVRNLHQ LADQLMSAEPNFGNDSNVNGEYRAREYVLFNEISRLLSPLL
NGNRLLVNNEAKFQALLRGIFQSCDNPAKVIIEFQLQRGRKIDLVL SKSAENDDTHPI
GIELKYANTAEQVERKRV EANRQLSEYEFCGGCKRITGGDAMVLLYAILNAV GQE QDL

```

```

ILIGGLRRASGFSR"
/product="hypothetical protein"
/besthit="qcoverage 100 , hcoverage 100 , similarity 99.9
, identity 99.9 , evalue 0.0 , alnlength 696 , Bacteria ,
Proteobacteria , WP_006014164.1 MULTISPECIES:
hypothetical protein [Wolbachia]"
gene complement(4677..5024)
/locus_tag="wEsol_00115"
CDS complement(4677..5024)
/locus_tag="wEsol_00115"
/codon_start=1
/transl_table=11
/product="hypothetical protein"
/pfam="rve rve_3 rve_2"
/translation="MLEFCLYTLKEALKQGKPEIFNSDQGVQFTSYNFIMELERANIK
ISMDHKGRCFDNIFVERLWRTLKQEAIIYYRPNSIRDNLNIINDFVAWYNYRRRHQTL
HYKVPADLYYHKQ"
/cog="Tra5 COG2801 232 Transposase and inactivated
derivatives"
/besthit="qcoverage 97.3913043478261 , hcoverage
59.5744680851064 , similarity 100 , identity 99.1 ,
evalue 5.82e-78 , alnlength 112 , Bacteria ,
Proteobacteria , KLT21577.1 integrase, catalytic region
[Wolbachia endosymbiont of Armadillidium vulgare str.
wVulC]"
gene complement(4975..5373)
/locus_tag="wEsol_00116"
CDS complement(4975..5373)
/locus_tag="wEsol_00116"
/codon_start=1
/transl_table=11
/product="hypothetical protein"
/pfam="HTH_21 rve DDE_Tnp_IS240"
/translation="MIQEVYLASDCRYGYRKITAEIIASGVVVNHKKILRIMKKMKIS
GLYCRKRCNTSIKEKKHKIYPYLLKDLIICRVNQVWATDITYIMVEGKFVYFVAIMDL
YSRYIIAHSLSPLYLDAGVLPLYSQRSSKTR"
/cog="Tra5 COG2801 232 Transposase and inactivated
derivatives"
/besthit="qcoverage 90.1515151515152 , hcoverage
51.5151515151515 , similarity 100 , identity 100 , evalue
6.88e-77 , alnlength 119 , Bacteria , Proteobacteria ,
KLT22412.1 integrase, catalytic region [Wolbachia
endosymbiont of Armadillidium vulgare str. wVulC]"
gene complement(5501..5785)
/locus_tag="wEsol_00117"
CDS complement(5501..5785)
/locus_tag="wEsol_00117"
/codon_start=1
/transl_table=11
/fullproduct="qcoverage 100 , hcoverage 100 , similarity
100 , identity 98.9 , evalue 4.02e-55 , alnlength 94 ,
Bacteria , Proteobacteria , OAM05084.1 hypothetical
protein TV41_03535 [Wolbachia endosymbiont of Dactylopius
coccus]"
/cog="COG2963 COG2963 116 Transposase and inactivated
derivatives"
/pfam="HTH_Tnp_1 HTH_28"
/product="hypothetical protein"
/translation="MATKKYEPELKAKIALEAIKNQRSTAEICSEYKIPSTNLYDWRD
RVLARLKDLFVEESESARKQRILAQEIESLHKVIGELTVENSYLKKKLLK"

```

```

/besthit="qcoverage 100 , hcoverage 100 , similarity 100
, identity 98.9 , evalue 4.02e-55 , alnlength 94 ,
Bacteria , Proteobacteria , OAM05084.1 hypothetical
protein TV41_03535 [Wolbachia endosymbiont of Dactylopius
coccus]"
gene complement(6085..6216)
/locus_tag="wEsol_00118"
CDS complement(6085..6216)
/locus_tag="wEsol_00118"
/codon_start=1
/transl_table=11
/pfam="Ank_2 Ank_4"
/fullproduct="qcoverage 100 , hcoverage 100 , similarity
100 , identity 100 , evalue 6.35e-23 , alnlength 43 ,
Bacteria , Proteobacteria , EAL57869.1 hypothetical
protein WwAna0747 [Wolbachia endosymbiont of Drosophila
ananassae]"
/translation="MAVHHPAKFDSLEVTKFLVNNKGVSFNAKTNDENKPIHIAADF"
/product="hypothetical protein"
/besthit="qcoverage 100 , hcoverage 100 , similarity 100
, identity 100 , evalue 6.35e-23 , alnlength 43 ,
Bacteria , Proteobacteria , EAL57869.1 hypothetical
protein WwAna0747 [Wolbachia endosymbiont of Drosophila
ananassae]"
gene complement(6513..6887)
/locus_tag="wEsol_00119"
CDS complement(6513..6887)
/locus_tag="wEsol_00119"
/codon_start=1
/transl_table=11
/pfam="HTH_31 HTH_19 Pfam-B_8788 HTH_3"
/fullproduct="qcoverage 100 , hcoverage 100 , similarity
100 , identity 100 , evalue 3.61e-81 , alnlength 124 ,
Bacteria;Eukaryota , Proteobacteria;Arthropoda ,
WP_007549999.1 MULTISPECIES: helix-turn-helix
domain-containing protein [Wolbachia]"
/translation="MTIQHPIDKQIGERIRKRRMLCGFSQRDLGKKLEISFQHVQGYE
SGEIRLVVDRLYKLAEVLSVDMSYFFTKASEDLHDKAFHSDVGSEEISRLVREYRKIE
DETLRDIVHLVIKALANTGFKA"
/product="helix-turn-helix domain-containing protein"
/besthit="qcoverage 100 , hcoverage 100 , similarity 100
, identity 100 , evalue 3.61e-81 , alnlength 124 ,
Bacteria;Eukaryota , Proteobacteria;Arthropoda ,
WP_007549999.1 MULTISPECIES: helix-turn-helix
domain-containing protein [Wolbachia]"
gene complement(6910..7239)
/locus_tag="wEsol_00120"
CDS complement(6910..7239)
/locus_tag="wEsol_00120"
/codon_start=1
/transl_table=11
/pfam="HTH_31 HTH_19 HTH_26 HTH_3"
/fullproduct="qcoverage 100 , hcoverage 100 , similarity
100 , identity 100 , evalue 4.50e-68 , alnlength 109 ,
Bacteria , Proteobacteria , WP_007549995.1 MULTISPECIES:
helix-turn-helix domain-containing protein [Wolbachia]"
/translation="MQLGKKIKQLRLDRALTQTELGKRIGVSYRQIQKYENGSNCVLA
SRLYDLAKALSIDVANFFFTDMHTDSHEAYDEEILKLVKGYNEIKSKRLRSAYVILVKS
FSQSDNT"
/product="helix-turn-helix domain-containing protein"

```

```

/blasthit="qcoverage 100 , hcoverage 100 , similarity 100
, identity 100 , evalue 4.50e-68 , alnlength 109 ,
Bacteria , Proteobacteria , WP_007549995.1 MULTISPECIES:
helix-turn-helix domain-containing protein [Wolbachia]"
gene complement(7291..8223)
/locus_tag="wEsol_00121"
CDS complement(7291..8223)
/locus_tag="wEsol_00121"
/codon_start=1
/transl_table=11
/fullproduct="qcoverage 100 , hcoverage 100.977198697068
, similarity 97.4 , identity 96.1 , evalue 2.37e-195 ,
alnlength 310 , Bacteria , Proteobacteria ,
WP_012673225.1 MULTISPECIES: hypothetical protein
[Wolbachia]"
/translation="MDILSYSTEKLKKHCQLLDDEEKIVLYEQLLDKAKDILENSRDD
IAKLKEVSKAVVAIEETTDKQLLEKFNDHPLREVDILIYSPQGNTEVANYLFSIDNS
SELYDLKKDKEKALYNAVKSNDVELVKKLLMILLPTEVGDFDVEYLEELKILLSGIHK
ELQLSQDMKNYLEKTIKFYSFLCSNFNLLVANPTDVKAMIDLFAAQPNIDYQIDKLLL
SFIVRDVEEKLNSEISHMIELLEQHERFAELEYKVRRLRSEFASGKSRYSAEVIRNS
IAEREKEMREIEKKYVRPNDLISERQKLLKQLLC"
/product="hypothetical protein"
/blasthit="qcoverage 100 , hcoverage 100.977198697068 ,
similarity 97.4 , identity 96.1 , evalue 2.37e-195 ,
alnlength 310 , Bacteria , Proteobacteria ,
WP_012673225.1 MULTISPECIES: hypothetical protein
[Wolbachia]"
gene 8422..9504
/locus_tag="wEsol_00122"
CDS 8422..9504
/locus_tag="wEsol_00122"
/codon_start=1
/transl_table=11
/pfam="Pfam-B_5362"
/fullproduct="qcoverage 100 , hcoverage 100 , similarity
99.7 , identity 99.7 , evalue 1.23e-248 , alnlength 360 ,
Bacteria , Proteobacteria , WP_012673224.1 MULTISPECIES:
hypothetical protein [Wolbachia]"
/translation="MKKINGKKLSSKMLKAVERIAKEGLLPNFIKAAAPTANKKISKLP
VLTYPEELNPFRSALCKIRLSEYENVKLNFELEKAI AENLDKLSKIVDEALDLGIRV
NARNEDGFSFTNVTMFKMYRDEFKQEDIIRKLALHGADFNQVQDKKIAEMYQKVQ
KEIEPQIYSRLKKLREVGEDATIEGTVEDVEIDNKTFYIEFSHCIVDVAKVVEGAKN
LGLSKGDLNLGGSIIKIGDGEVEVKTKGDGKRNYVDISDNSAFTVTLC TSLGELNLMV
YHDTEDYHQVQVEVEDEEMWNELQEIGEIVGKGCLFGGMSVKEVVEKGSFTRCGRWGD
QNSKSSETFSWGSKLKDKTTSVGRS"
/product="hypothetical protein"
/blasthit="qcoverage 100 , hcoverage 100 , similarity 99.7
, identity 99.7 , evalue 1.23e-248 , alnlength 360 ,
Bacteria , Proteobacteria , WP_012673224.1 MULTISPECIES:
hypothetical protein [Wolbachia]"
gene complement(9641..10012)
/locus_tag="wEsol_00123"
CDS complement(9641..10012)
/locus_tag="wEsol_00123"
/codon_start=1
/transl_table=11
/pfam="HTH_31 Pfam-B_17975 HTH_19 HTH_3 HTH_26"
/fullproduct="qcoverage 100 , hcoverage 100 , similarity
100 , identity 100 , evalue 1.60e-79 , alnlength 123 ,
Bacteria , Proteobacteria , WP_141457079.1

```

```

helix-turn-helix domain-containing protein [Wolbachia
endosymbiont of Carposina sasakii]"
/translation="MIVQDEQHPIDKQIGERVERKRRLLICGFSQORDLGKKLGISFQHIQ
GYETGEVRLVIDRLYNLAEALSVDMSYFFTKASEDLHDKAFCDVGSEEISRLVREYR
KIKDETLRDIVHSVIKALANK"
/product="helix-turn-helix domain-containing protein"
/besthit="qcoverage 100 , hcoverage 100 , similarity 100
, identity 100 , evalue 1.60e-79 , alnlength 123 ,
Bacteria , Proteobacteria , WP_141457079.1
helix-turn-helix domain-containing protein [Wolbachia
endosymbiont of Carposina sasakii]"
gene complement(10047..10379)
/locus_tag="wEsol_00124"
CDS complement(10047..10379)
/locus_tag="wEsol_00124"
/codon_start=1
/transl_table=11
/fullproduct="qcoverage 100 , hcoverage 100 , similarity
100 , identity 100 , evalue 1.02e-69 , alnlength 110 ,
Bacteria , Proteobacteria , WP_041582615.1 MULTISPECIES:
helix-turn-helix domain-containing protein [Wolbachia]"
/cog="HipB COG1396 120 Predicted transcriptional
regulators"
/pfam="HTH_31 HTH_19 Pfam-B_9358 HTH_3 HTH_23 HTH_26"
/product="helix-turn-helix domain-containing protein"
/translation="MELGKKIKELRLYCGLTQTELGKKIGVSYRQIQRYENSSNQILA
SRLYDLAKALSINVADFFTDVHVDSHETYDEEILKLVKGYNEIKSKRLRSVVYILVKS
FSQSYNES"
/besthit="qcoverage 100 , hcoverage 100 , similarity 100
, identity 100 , evalue 1.02e-69 , alnlength 110 ,
Bacteria , Proteobacteria , WP_041582615.1 MULTISPECIES:
helix-turn-helix domain-containing protein [Wolbachia]"
gene complement(10483..11142)
/locus_tag="wEsol_00125"
CDS complement(10483..11142)
/locus_tag="wEsol_00125"
/codon_start=1
/transl_table=11
/fullproduct="qcoverage 100 , hcoverage 100 , similarity
100 , identity 100 , evalue 1.45e-149 , alnlength 219 ,
Bacteria , Proteobacteria , WP_012673223.1 MULTISPECIES:
DNA repair protein RadC [Wolbachia]"
/cog="RadC COG2003 224 DNA repair proteins"
/pfam="RadC"
/tigr="TIGR00608 radc 218 DNA repair protein RadC"
/product="DNA repair protein RadC"
/translation="MNSERKEKLETRILSSRGRSLLDHELLERTLSECEEGREVAKK
LIELFSSSLGRVINADFHELKNVTGMNDGAIASIFCLKEIFDRILKGKLLKLSILDNRE
ELLKYFKTAIGQSRKESLRVIYLD RSGHLIYEYIQDCGTIDRVPLYVREI IKQGLLID
ASSIAISHNHPSGDTEPSKEDEDNTLTAA TCENVGMKLIDHIIVTQKSHFSFYDSGL
L"
/besthit="qcoverage 100 , hcoverage 100 , similarity 100
, identity 100 , evalue 1.45e-149 , alnlength 219 ,
Bacteria , Proteobacteria , WP_012673223.1 MULTISPECIES:
DNA repair protein RadC [Wolbachia]"
gene complement(11227..11349)
/locus_tag="wEsol_00126"
CDS complement(11227..11349)
/locus_tag="wEsol_00126"
/codon_start=1

```

```

/transl_table=11
/fullproduct="qcoverage 100 , hcoverage 100 , similarity
100 , identity 100 , evalue 8.18e-18 , alnlength 40 ,
Bacteria , Proteobacteria , ONI56244.1 hypothetical
protein N500_0678 [Wolbachia pipientis wUni]"
/translation="MIANINTVALQGISTVNVNAQIHMANGIPAFKATRTTLQI"
/product="hypothetical protein"
/besthit="qcoverage 100 , hcoverage 100 , similarity 100
, identity 100 , evalue 8.18e-18 , alnlength 40 ,
Bacteria , Proteobacteria , ONI56244.1 hypothetical
protein N500_0678 [Wolbachia pipientis wUni]"

```

# ORIGIN

```

1  aacaaataag ctctcaatct gtaatccata aagcttctga tttaatagat acgatgtact
61 catataatTTt tactacaaaa ctaataatat aaaagttttc tgatgtacgt cccagaatg
121 tgatcgtaag ggttcattat aaataattcg gtaaatttcg tctctttaga catattaaga
181 gctatgtaac gaacgtttat atttgtgagt aatagtaagg ctcaaggtaa ggaaaatgct
241 agtgaggtaa agtagaataa cggttaatttg ataatttaag ctcatccct cttgctacat
301 ctctctttaa tatctcctct tttgcagcag gtctataatt actgcttaaa tttagggtgca
361 cactaatttt tcgatttata tattattcta atgcttgat aataccttca ttgaatattt
421 gattttgagg taattagatg ccaaaaagta aaactaaacg tggaacggaa gatttgaagg
481 gtaatgcagg cccaagcaaa agatctcgtc tcagttctga tcctaaaaaa aataaagaga
541 ttatctctag caaagtaata agtaagctga aggatgttgt taaagggtgat agaacttcag
601 ctattgagga atgggtcaag tctcaccctg taacagtaga ggggtctaacc gttgagcaat
661 cggacctctt atgtaatgcg tttcgtgatg aatccttggtg gtcaggtgcg acactagatg
721 ttgctaaatt ggtaggagaa ttagctaaat caggtgtgtt gaatccattt gctatatata
781 aaatagcatg tattgagtgt gtagagagtg aaattaagca attatttgac aaggcgtag
841 agtcttttag atctgactta tctcataaag gtgcatgtga ggaagatagg aatttagctt
901 gcagtataaa gcttgcaaga gttgaattgt taagtttcat gggaagacgt gatcctgttt
961 tcaatttctg gattgatcaa gaatcaggta acctagaga aaatatagaa gcagaagatg
1021 gatttaataa ggctgtagat ttgaagtgga gtaagggtgt ggaacacttc tataatcgct
1081 tgtgttctga agaaaaatta gtgaaagaag agagagaaaa attgctagtt tctgctattg
1141 caaaattatc tccattgcaa tctagctata aacttgcttc taccttaaat tcccttctag
1201 gtaaagtcac aagcgcaaaa gtagatcata agtcactact tgggctaccg aataagaaag
1261 ataggggtgt gatctatcgt cctcttagtt acttagtaga gcacggtttt ctttgacaaa
1321 ctaagtatgt tatccagtac ttgagcgagg gatgttcaag atctgaagta gagaaaatgc
1381 tttcacctag aggatatgca catcttctct catcgctttc atttgttgta gtttctaaag
1441 attatgactt ggataacagg aatgaagcaa ggtcagctat tagcagtctt tgggaatcta
1501 gtgtatttaa ccaaaaataaa ataaatgttg tcgatccttt taaagatagg attgcttttg
1561 ttgcaatgga aaatgcaatt tcaaatttga ttgtagatca ggagaacagc aaggatactc
1621 aaagtgcctg cgatggtgaa aaagttgatt tgggtcttgag tatttttaaag tttgctaaag
1681 attgttggtc agacaaaagc tttaaatcat taaaagagag gatagcaaat agtttagata
1741 aaacaaggaa ttctaagatg atagatgcaa ctagctcctg caatttaata gaagagttgt
1801 gtaagtcagc gagaaatttg aatttattct ctgctagcac tgaaggctct caatctacgt
1861 tagtgggtac taatgttagt atttcgcctg ctgcagttgt taacaaatag gagtatttat
1921 gcatggtaat aatgaagatc gtgaattagt tagggcttta ttaagtggag gttgtgatga
1981 gtttagtaga caatttgtag gtttttttaa caactgtcca tcttttttgc attcggctaa
2041 taagcctggc ttttttccta cattcttttt tggtatgttt tctactgcac atgatgcagg
2101 tatattagtt gaagatgaaa gagtctatTTt tcgttttgac aattatggaa atctaaaagt
2161 tgctgttctc actaataaaag aaaatagaag aatagtcagg tgttatactg ttgctgataa
2221 tgagaacagc cctgggtcaa ggttttagtg agaagagaag cagcaggtag aagagaatct
2281 tccacaagaa ttacaggaag atgaggatct ggattgggaa gagtataaaa tatttcggtt
2341 tggagaagaa tgtaggttta ttcatgaaat agatagattt cctcaacgtg atgaacctgg
2401 agtccaatt tttcatgaaa ttaaccaaat cagagaacaa ggtgaattgt tagacctgat
2461 gagtgagttg gcaaatgacg atacaggaga agtgagtact aatgttaaaa gaattttgga
2521 atatgttatt gatatccatg atgaacatga agatagctta gtgtttcgtg cagagtctga
2581 ttaccacggt tttctgtgtg ggttttttagt aaatttttaga taccgagctg tggctgattt
2641 ctaccagag ctacttatag gaaaaggtta tgcagatgtt gttttgcttg ttcgtggtgt
2701 tgatcagaca aatgattcgg ttccaattat aattgagttg aagggttggtg atgaggaagg
2761 attagagcaa gctaaagatt atgctaaaag ttgttctgtt tcgtctttgc ctattcatac
2821 ctcatcacca agtgctgttt gtgtagcggt aaattttcaa ttacgtggag gtgctggtct

```

|      |             |             |             |             |             |             |
|------|-------------|-------------|-------------|-------------|-------------|-------------|
| 2881 | ccgaacttct  | gtgcaggcct  | tttcagaagg  | tggctctttcc | ttaataaccgg | gtttactaca  |
| 2941 | tcctcatgga  | aatggagtta  | ggggaaatgt  | aaaacgtttt  | ttacaaccca  | tagcatcaga  |
| 3001 | gttcactcaa  | tcgcctcatt  | gtaacacttt  | ttcctgtacg  | tcatcgtttg  | tttttgga    |
| 3061 | tgttttatct  | acaaggaggg  | acttagaaac  | aatgatggg   | cgggaggtta  | gggttacaa   |
| 3121 | gtatctattt  | aaccactctc  | agggagagaa  | aatgaaacgt  | acaggtggta  | ggggagatgc  |
| 3181 | agcagatatt  | gtaagccatg  | cgttaacttt  | agctctattt  | ttatcaaata  | ttggtttttt  |
| 3241 | tgtgcttcac  | atttttcgtc  | gtttaaagtg  | gcagacttta  | ccagacaagg  | cattgaacct  |
| 3301 | gtcgttactg  | cctcaagcca  | cagatgatgc  | taaggtgctg  | caagtacttt  | gtgaagtaga  |
| 3361 | tgtccagggg  | catctggaag  | tggcttctgc  | aaagaaattc  | gaatcactac  | gtgcttactc  |
| 3421 | acgtttctcat | agtgaagggt  | atttcgaggg  | aaggttttca  | gaacaaatgg  | gtaatgtag   |
| 3481 | gaattttacat | caacttgcag  | atcagttgat  | gagtgcctgag | cctaattttg  | gtaatgatag  |
| 3541 | taatgttaat  | ggtgagtaca  | gggctaggta  | tgaagtttta  | tttaatgaga  | tttctcgtct  |
| 3601 | gttgtctccg  | ttattaaatg  | gaaaccgtct  | actcgtgaac  | aatgaagcta  | aatttcaggc  |
| 3661 | tttgttgctg  | gggatatttc  | aaagttagcga | taatcctgcc  | aaggtaatta  | ttgagttcca  |
| 3721 | gctacagaga  | ggaaggaaaa  | tagacctagt  | attatcaaaa  | tctgcggaaa  | atgatgatac  |
| 3781 | tcattccaatt | ggaatagagt  | tgaagtatgc  | taacaccgca  | gaacaagttg  | aacgaaaaag  |
| 3841 | ggtggaggca  | aatcgacagt  | taagtgaata  | cgaattttgt  | ggaggatgca  | agcgtattac  |
| 3901 | tgggggagat  | gcgatgggtt  | tgttatacgc  | tatattaaat  | gctgtaggac  | aagagcagga  |
| 3961 | tctgatattg  | attggtgggc  | ttcgtagagc  | atctgggttt  | tctagatgac  | ttgtaactaa  |
| 4021 | taaaagtacc  | aaagataagg  | ttgtttatgg  | gtaaaattat  | gcattaagct  | agagtacgtt  |
| 4081 | tgagtaagg   | tggagaaaaa  | gcaaggctct  | tgagcaagaa  | aatttgattt  | atgttttctt  |
| 4141 | aagttaaagt  | taacctgatg  | aagtttgtat  | aatttattgt  | tggagttttt  | ttgttctatt  |
| 4201 | tttactataa  | gttcaatctg  | ctctatcttt  | ggctcttttt  | tcttagtttt  | gcggcaagtc  |
| 4261 | taatgttttt  | actacttaat  | ggaataactt  | gcagaaagtg  | gagatataat  | gctaaggcag  |
| 4321 | aggagctcag  | acagttatct  | taaacaataa  | agaaatacta  | aaggcaaaag  | atacgcttgc  |
| 4381 | gtagttcgaa  | agctttctat  | aggataagcc  | tcacctgatt  | tacaaataga  | attgttatgt  |
| 4441 | tagatgtttg  | ctattttatt  | ttaagctcat  | tttaacagca  | ttttgctttt  | tttagtatgt  |
| 4501 | aggggttttc  | taggaattat  | cctactgaat  | tctatgatat  | tattttttgt  | aacattgtta  |
| 4561 | tacattataa  | tgcacccatt  | tgtctagacc  | atttttttca  | aagtgatccg  | atttttaaaa  |
| 4621 | tgaatatggt  | gataaatacg  | tcgacacata  | tttaaagtat  | ttatgaatat  | attcattttac |
| 4681 | tgtttatgat  | aatagagatc  | agcaggaact  | ttataatgta  | gagtctgatg  | tcgccttcta  |
| 4741 | tagttataacc | aagcaacaaa  | atcgttttat  | ataagattca  | aatctctgat  | actatttggt  |
| 4801 | ctataataat  | atatagcttc  | ttgcttttaa  | gttctccata  | agcgctcaac  | aaatatattg  |
| 4861 | tcgaagcaac  | gtccttttat  | gtccatactg  | attttaatat  | tagcacgctc  | taattccata  |
| 4921 | ataaagttgt  | agctagttaa  | ctgtacccct  | tgatcactat  | taaaaaatct  | aggtttacct  |
| 4981 | tgttttagag  | cttctttgag  | agtataaagg  | caaaactcca  | gcatcgagat  | atggtgataa  |
| 5041 | tgaatgagca  | ataatatagc  | gactatacaa  | gtccattatt  | gccacaaaat  | agacaaactt  |
| 5101 | accttctacc  | ataatatatg  | ttatatcagt  | agcccatacc  | tgatttaactc | tacaaataat  |
| 5161 | caaactcttg  | agtaaataag  | gatataat    | atgctttttt  | tctttaatac  | ttgtattaca  |
| 5221 | tctttttcta  | caatacagcc  | cactaatctt  | catttttttt  | ataattctta  | agattttttt  |
| 5281 | gtgattgact  | actactccac  | tcgctatgat  | ctcagcagta  | atttttacgat | atccataacg  |
| 5341 | gcaatcgaa   | gccaaatata  | cttcttgaat  | caaatttcac  | tttcggttatt | aattataggc  |
| 5401 | ctataatata  | ggctagatct  | gcaaattccc  | agtaaatacag | cctattttcct | aattgacaga  |
| 5461 | tcagaatctt  | tttctataaa  | tcttactcta  | tcttttttgc  | ttattttcagt | aatttttttt  |
| 5521 | tcaaataact  | atttttccact | gtcaattctc  | ctattacttt  | atgtaaactt  | tctatttctt  |
| 5581 | gcgctaagat  | tctttgtttt  | ctcgcacttt  | cacttttctc  | aacaaatagg  | tcttttaacc  |
| 5641 | ttgccaatac  | tctatcacgc  | caatcatata  | gatttggtga  | tggatatttta | tattcactac  |
| 5701 | atatctcagc  | tgtgcttctt  | tgatttttta  | ttgcttccaa  | agctatcttt  | gcttttaact  |
| 5761 | ctggttcata  | tttttttggt  | gccatacttt  | taccccttta  | ctttcctact  | cggatcaacc  |
| 5821 | attttttttg  | gtctagttta  | tggggtgcat  | tatattctat  | gagaaattct  | acagatggta  |
| 5881 | aatggccttc  | cttggcagca  | tagtagactg  | atctgtagtt  | ttagaattat  | taataaatga  |
| 5941 | ttcttggtgt  | tgtctttcta  | ttagaagctt  | tacaattcct  | agatatcctt  | tattggtagc  |
| 6001 | ataatgcaaa  | ggagtccaat  | tgtttttacc  | ttttgtacca  | acttctactc  | ccttattgag  |
| 6061 | agaaaatttt  | acaatatcga  | tattttcaaaa | atcagctgca  | atatgaatag  | gcttggtttc  |
| 6121 | gtcattagtt  | ttagcggtta  | aacttacacc  | tttattattt  | actaaaaatt  | ttgttacttc  |
| 6181 | taagctatca  | aacttagctg  | gatggtgcac  | agccatcttg  | acaaaaaaat  | catcccccta  |
| 6241 | tcgcgttctt  | atcattatgc  | cttataaccct | gtattacacc  | ttcagatata  | gtcatttcta  |
| 6301 | acctccaaca  | tccttgctaa  | tagaccctca  | ctaaaactgc  | cgaaaagact  | ttataagtta  |
| 6361 | atatttctaaa | tctcagtatt  | ttatggtgca  | ggttttgatt  | tttaaaacat  | tatactttgt  |
| 6421 | gtaggggtata | actacacgca  | tcaaagtga   | agaaaagcaa  | aatgatgaag  | aaaatgaaag  |

|       |             |             |             |             |             |             |
|-------|-------------|-------------|-------------|-------------|-------------|-------------|
| 6481  | tttaagtttt  | cttcaacgac  | tcaaggagag  | aactatgctt  | taaagcctgt  | attagcaaga  |
| 6541  | gccttaaatca | ctaaatgaac  | aatgtcacgc  | agagtttcat  | cctcaatttt  | tctatattcc  |
| 6601  | ctcactagcc  | ttgatatttc  | ttcgctgcct  | acatcgctat  | ggaaggcctt  | atcatgtaag  |
| 6661  | tcttcagagg  | ctttggtaaa  | aaaatacgac  | atatcaaccg  | atagtacttc  | tgctaattta  |
| 6721  | tataacctat  | caactacaag  | cctaattctct | ccgctttcat  | atccttgtag  | atgctgaaat  |
| 6781  | gaaatttcaa  | gcttttttcc  | taagtctctt  | tgactaaaac  | cacacattag  | ccttcttttc  |
| 6841  | cttattcttt  | cacctatttg  | tttatcgata  | ggatgttgta  | tagtcatttt  | acgtatcagg  |
| 6901  | taatattaac  | tatgtattat  | cactttgaga  | aaaagatttt  | accaatatat  | aaactgcact  |
| 6961  | acgtaacctt  | ttgctcttaa  | tttcggtata  | tcctttgact  | aacttttagta | tttcttcac   |
| 7021  | ataagcttca  | tgtgagtcag  | tgtgcataatc | agtaaaaaag  | ttagcaacat  | ctatcgatag  |
| 7081  | tgcttttgct  | aaatcatata  | gtctactggc  | caaaacacaa  | tttgaaccat  | tttcgtactt  |
| 7141  | ttgtatctgt  | ctatacgaaa  | cacctattct  | ctttcccaat  | tcggtctgtg  | tcaaagcacg  |
| 7201  | atctaaccta  | agttgtttta  | tttttttacc  | taattgcaat  | tttcacctct  | tattcaaatt  |
| 7261  | tacaacaaat  | tttatgaagt  | ggaaaaaaag  | ctagcaaagt  | aattgcttta  | ataatttctg  |
| 7321  | cctctcgcta  | attaaatcgt  | ttggccttac  | gtattttttc  | tcaatttccc  | tcactctctt  |
| 7381  | ttctcgttct  | gcaatgctat  | ttcgtattac  | ttcagccgag  | tatctgcttt  | tgccacttgc  |
| 7441  | aaactctgat  | cttaatcttc  | taaccttgta  | ttcgagctca  | gcaaactctt  | cgtgttgctc  |
| 7501  | aagaagttct  | atcatatgac  | taatttcaga  | gtttagcttt  | ttttcctcaa  | catctcttac  |
| 7561  | aataaaaagaa | agtagaagct  | tatctatttg  | gtaatcaata  | tttggttgag  | cagcaaatag  |
| 7621  | atcaatcatg  | gcttttacgt  | cagtgggatt  | tgcaactagt  | aagttaaaat  | tactacataa  |
| 7681  | aaaactatag  | aattttattg  | tcttctcaag  | ataatttttc  | atatcttggtg | ataattgcaa  |
| 7741  | ttcttttgta  | attcctgaca  | gcaatatttt  | taattcttcc  | aagtattcta  | catcaaaatc  |
| 7801  | acctacttct  | gtaggtaaaa  | ggatcattag  | cagctttttt  | acaagctcaa  | catcatttga  |
| 7861  | cttaactgca  | ttataaagag  | ctttttcttt  | atcttttttt  | aaatcataaa  | gctctgatga  |
| 7921  | gttatctatg  | ctgaacaggt  | aatttgccac  | ttcagtgttt  | ccttgaggag  | agtagattaa  |
| 7981  | aatgtccact  | tctcttagcg  | ggtgatcatc  | attaaacttt  | tctagtaact  | gcttatcggt  |
| 8041  | agtttcctct  | attgctacaa  | ctgctttgct  | tacctctttc  | aactttgcaa  | tatcatctct  |
| 8101  | tgagttttca  | agtatatctt  | tagccttgct  | tagcagctgc  | tcatatagaa  | ctattttttc  |
| 8161  | ttcatcatca  | agtagctgac  | aatgcttttt  | cagcttttca  | gtagagtaag  | ataggatattc |
| 8221  | cattttttttc | aatttttacga | ttacgatacc  | ccatttttgt  | tgaaactgaa  | ataattttta  |
| 8281  | taggatgtgt  | ttttctagt   | tagatgcccg  | caaaacttgt  | tattataata  | tacagtaaat  |
| 8341  | caataagtcg  | tataatatta  | acaattaaat  | aatattttatc | acgatatgat  | cgaatagtaa  |
| 8401  | tgaaatttaag | tgaggggttac | aatgaaaaaa  | ataaatggta  | aaaaattgtc  | tagtaaaatg  |
| 8461  | ttaaaagcgg  | tagagcgaat  | agcaaaaagaa | gggttatttac | ctaattttat  | aaaagctgct  |
| 8521  | ccaacagcaa  | ataaaaagat  | tagtaaaatta | cctgtcttaa  | catatcctga  | ggagctcaat  |
| 8581  | ccatttcgat  | cagcttttatg | caagataagg  | ctaagtgaat  | atgaaaatgt  | gaaattaaat  |
| 8641  | gaattcttgg  | aaaaagctat  | tgcagctgaa  | aatctagaca  | aattaagtaa  | aatcgctgat  |
| 8701  | gaagctttgg  | atttaggaat  | aagagtaaac  | gctcgcaacg  | aagatggctt  | tagcttctact |
| 8761  | aacgtttacaa | tgtttaagat  | gtatcgtgat  | gaattcaaag  | aaaataaaca  | agaagatata  |
| 8821  | atcagaaagt  | tagccttaca  | tggagcagat  | tttaatgtac  | aagttgataa  | gaaaatagct  |
| 8881  | gaaatgtatc  | aaaaagtgc   | aaaagaaatt  | gagccacaaa  | tatatagtag  | gctcaagaaa  |
| 8941  | cttagggaag  | ttggagaaga  | cgctactata  | gaaggaaactg | ttgaagatgt  | agaaatcgat  |
| 9001  | aataagacct  | tctatattga  | attttcacat  | agctgcatag  | ttgatgttgc  | caaagtgtga  |
| 9061  | gaaggtgcaa  | aaaatttggg  | cttaagtaaa  | ggagacttaa  | accttggcgg  | tagtatcata  |
| 9121  | aaaataggtg  | atggtgaagt  | tgaggtcaaa  | actgggaaaag | acggtaaaaag | aaattacgta  |
| 9181  | gatatatccg  | ataacagcgc  | ttttacagta  | acactttgca  | ctagcctagg  | agagctaaat  |
| 9241  | ttaatggtat  | atcatgacac  | agaagactat  | catcaagtac  | aagttgaggt  | agaagatgaa  |
| 9301  | gaaatgtgga  | acgagttgca  | agaaatagga  | gaaatcgtag  | gaaaggggtt  | tttatttgggt |
| 9361  | ggaatgtctg  | ttaaagaagt  | agtggaaaaa  | ggcagcttta  | ctagatgtgg  | aaggtggggc  |
| 9421  | gaccaaatt   | ctaaaagtag  | tgagaccttt  | tcttggggga  | gcaaattaaa  | agataccaaa  |
| 9481  | acgacatctg  | taggacgttc  | ttgattgggtg | gctatgtttt  | tacatagcca  | taattattgc  |
| 9541  | aaagtaaagt  | agttcttgaa  | atttaataca  | aattaccata  | aaaaatttac  | cttaactagc  |
| 9601  | attgcttgta  | gaagtggatt  | gaagatatat  | tcaggcaata  | ttattttattg | gcaagcgctt  |
| 9661  | ttatcactga  | atgcacaata  | tcacgcaacg  | tttcatcctt  | aatttttctg  | tattccctca  |
| 9721  | ctagccttga  | tatttcttca  | ctaccacat   | cgctacaaaa  | ggccttatcg  | tgtaagtctt  |
| 9781  | cagaagcttt  | ggtaaaaaaa  | tatgacatat  | caacggacaa  | agcttctgcc  | aaattataca  |
| 9841  | atctatcaat  | tacaagcctt  | acctctccag  | tttcatatcc  | ttgtatatgc  | tgaaatgaaa  |
| 9901  | ttccgagctt  | ttttcctaag  | tctctttggc  | taaaaccgca  | tattaacctt  | ctcttcctta  |
| 9961  | ctctttcacc  | tatttgttta  | tcaataggat  | gttgttcatc  | ttgtacaatc  | atttattaat  |
| 10021 | atattaactg  | aggtattgaa  | gcaatactaa  | ctctcattgt  | aactttgaga  | aaaagatttt  |

```

10081 accaatatat aaactacgct acgtaacctt ttgcttttaa tttcattata tcctttgact
10141 aatttttagta tttcttcac c ataagtttca tgtgagtcga catgcacatc agtaaaaaaa
10201 tcagccacat taatcgatag tgcttttgct aagtcgtata gcctactggc caaaatttgg
10261 tttgaactat tttcgtacct ttgtatttgt ctatacgaaa cgcctatttt ctttcccaac
10321 tcagtttgtg ttaaaccaca gtataatcta agttctttta tttttttgcc taattccacc
10381 tttcattact aatttttagct gctcaagctt atattgaatt ttttaattta tgaagtagaa
10441 aaaaagaagg aaagttggag aactttcctt ccggtctaca gattacaata aaccactatc
10501 ataaaaacta aagtggctct tctgtgttac gattatgtga tctattaatt tcattcctac
10561 attttcgcag gttgcagcta atgtaagtgt gttatcctca tcctcctttg atggttctgt
10621 atctccactt ggatgattat gtgaaattgc aatagatgat gcatcgatca gtaatccctg
10681 tttgattatt tctctcacat atagaggtag tctgtctata gttccacagt cttgaatata
10741 ctcgtatatc aaatgaccac ttcgatctaa gtatattact cgcaagcttt cctttcgtga
10801 ctgccctatt gctgttttaa agtatttttag tagctcttct ctgttatcaa gaatcgacag
10861 cttttttaac ttacctttca gtatcctatc gaaaatctct ttcagacaaa agatacttgc
10921 tattgctcca tcattcattc ctgtaacatt ttttagctca tgaaagtcag cgtaattac
10981 ccttcctaaa ctactaaaga gctctattag ctttttggcc acttctcttc cttcttcaca
11041 ttcagataga gtacgttcca gtagctcatg gtcaagtaaa gacctgcctc tacttgataa
11101 aatgcgagtt tccaattttt cttttctctc actattattc ataaaaacct ccaaggtaaa
11161 cattatatac aaattcaacg ccagctttct gacgcagtag ttctcgagga ataacccttt
11221 tgaactctaa atttgcaatg ttgtccttgt tgcttttaaaa gctggaatac catttgccat
11281 atgaatttgt gcattgacat ttactgtgct aattccctga agcgcaacgg tatttatatt
11341 tgcaatcata atatattata taaaattgtt aatataata

```

//

```

LOCUS      JAQZAU010000013      5775 bp      dna      linear      ENV 17-MAR-2023
DEFINITION MAG: Wolbachia pipientis isolate wEsol contig_14972, whole genome
            shotgun sequence.
ACCESSION  JAQZAU010000013  JAQZAU010000000
VERSION    JAQZAU010000013.1
DBLINK     BioProject: PRJNA929258
            BioSample: SAMN33142973
KEYWORDS   WGS; ENV; Metagenome Assembled Genome; MAG.
SOURCE     Wolbachia pipientis (insect metagenome)
ORGANISM   Wolbachia pipientis
            Bacteria; Pseudomonadota; Alphaproteobacteria; Rickettsiales;
            Anaplasmataceae; Wolbachieae; Wolbachia.
REFERENCE  1 (bases 1 to 5775)
AUTHORS    Fiutek,N., Couger,B.M., Roy,S., de la Torre,J.R. and Connor,E.F.
TITLE      Genomic assessment of the contribution of the Wolbachia
            endosymbiont of Eurosta solidaginis to gall-induction
JOURNAL    International Journal Molecular Sciences
REFERENCE  2 (bases 1 to 5775)
AUTHORS    Fiutek,N., Couger,B.M., Roy,S., de la Torre,J.R. and Connor,E.F.
TITLE      Direct Submission
JOURNAL    Submitted (10-FEB-2023) Biology, San Francisco State University,
            1600 Holloway Ave, San Francisco, CA 94132, USA
COMMENT    ##Genome-Assembly-Data-START##
            Assembly Date      :: JUN-2019
            Assembly Method    :: FLYE v. 06-2019
            Genome Representation :: Full
            Expected Final Version :: Yes
            Genome Coverage     :: 100.0x
            Sequencing Technology :: Illumina HiSeq; PacBio Sequel
            ##Genome-Assembly-Data-END##
FEATURES   Location/Qualifiers
            source              1..5775
                                   /organism="Wolbachia pipientis"
                                   /mol_type="genomic DNA"
                                   /submitter_seqid="contig_14972"
                                   /isolate="wEsol"
                                   /isolation_source="galls on Solidago altissima"

```

```

/host="Eurosta solidaginis MN-2018-EFC"
/db_xref="taxon:955"
/environmental_sample
/country="USA: Cowling Arboretum, Carleton College,
Northfield, MN"
/lat_lon="44.48 N 93.13 W"
/altitude="280 m"
/collection_date="2018-11"
/metagenome_source="insect metagenome"
/note="metagenomic"
gene complement(<1..362)
/locus_tag="wEsol_00127"
CDS complement(<1..362)
/locus_tag="wEsol_00127"
/codon_start=1
/transl_table=11
/product="hypothetical protein"
/pfam="Ank Ank_4 Ank_2 Ank_5 Ank_2 Ank Ank_4 Ank_5 Ank
Ank_3"
/translation="MMDLVRYLVDKGADVYTQDKGGKTLLDIATDQKHNNIVEYLRV
QLDKELLIAAQYGNLSKVEDLVSQRASLSAKYSDGRTLHCAAYGGELNVVKYLVVGE
KSSLKIKDNSGRIPIQYA"
/cog="Arp COG0666 235 FOG: Ankyrin repeat"
/besthit="qcoverage 53.33333333333333 , hcoverage
1.67451596023025 , similarity 98.4 , identity 96.9 ,
evaluate 2.95e-29 , alnlength 64 , Bacteria ,
Proteobacteria , WP_208571570.1 ankyrin repeat
domain-containing protein [Wolbachia pipientis]"
gene complement(331..726)
/locus_tag="wEsol_00128"
CDS complement(331..726)
/locus_tag="wEsol_00128"
/codon_start=1
/transl_table=11
/product="hypothetical protein"
/pfam="Ank_2 Pfam-B_10896 Ank_5 Ank_4 Ank Ank_3 Ank_4
Ank_5 Ank Ank_3"
/translation="MLTDGRTDGRTDMAQSNFFSILIILIYGSYLRSRFLYICTTNR
PIKINILCELCSTEYKNGWTPHFAAWRGLLEVANFLIEKGADINAENIFGRIPIHIA
AENNNKDIIDFFLSKGMSIDDGFSKVP RR"
/besthit="qcoverage 23.6641221374046 , hcoverage 25 ,
similarity 87.1 , identity 71.0 , evaluate 4.99e-07 ,
alnlength 31 , Eukaryota , Arthropoda , XP_011706058.1
PREDICTED: receptor-interacting serine/threonine-protein
kinase 4-like, partial [Wasmannia auropunctata]"
gene 3112..3564
/locus_tag="wEsol_00129"
CDS 3112..3564
/locus_tag="wEsol_00129"
/codon_start=1
/transl_table=11
/product="hypothetical protein"
/translation="MICFQKGGLLFDEFDMLFHSLYEETDTYQNIIRAIKKPKGISR
KELIKVTKITEGGRLTDKLRSLLEAEFIGGFLPLNKGKRGVYYRVMDEYVLFYLTWIE
PFKEVTKRAIISYAHYWELAIKKPAWQTWTGQTFEAVCFKHANVIRKN"
/besthit="qcoverage 99.33333333333333 , hcoverage
46.417445482866 , similarity 96.0 , identity 95.3 ,
evaluate 4.69e-95 , alnlength 149 , Bacteria ,
Proteobacteria , MBV2146633.1 winged helix-turn-helix
domain-containing protein [Wolbachia endosymbiont of

```

gene                   Pissodes strobi]"  
3678..3887  
/locus\_tag="wEsol\_00130"

CDS                   3678..3887  
/locus\_tag="wEsol\_00130"  
/codon\_start=1  
/transl\_table=11  
/product="hypothetical protein"  
/translation="MLSEIKYSDKPYTVTKEFVEQLKRKEAIYREKTSKKQIFWVLI  
AANGVSENQYLKDTIHHVITLEDLF"  
/besthit="qcoverage 100 , hcoverage 21.4953271028037 ,  
similarity 98.6 , identity 98.6 , evaluate 7.80e-36 ,  
alnlength 69 , Bacteria , Proteobacteria , MBV2146633.1  
winged helix-turn-helix domain-containing protein  
[Wolbachia endosymbiont of Pissodes strobi]"

gene                   3995..4579  
/locus\_tag="wEsol\_00131"

CDS                   3995..4579  
/locus\_tag="wEsol\_00131"  
/codon\_start=1  
/transl\_table=11  
/product="hypothetical protein"  
/pfam="UbiD"  
/tigr="TIGR03701 mena\_SCO4490 433 menaquinone  
biosynthesis decarboxylase, SCO4490 family"  
/translation="MTEIHRRVLSNKGPAIIFENVVTENGKNSIPVLVNLFRITIKRIA  
LGLNINPGELRDLGKILAFILRSPEPPKNFKDAVKMFLLKVVLSMRSKVVSAPCLEV  
VLTGDEVLDLSLLPIQTCWPNEPAPLITWPIVVTKGPTEDKEDNFNLGIYRMQVIDKK  
DSNALACTSWWCRSPQTMEREGTKYEISCCCCDR"  
/cog="UbiD COG0043 477 3-polyprenyl-4-hydroxybenzoate  
decarboxylase and related decarboxylases"  
/besthit="qcoverage 81.9587628865979 , hcoverage  
72.6027397260274 , similarity 98.1 , identity 94.3 ,  
evaluate 1.07e-101 , alnlength 159 , Bacteria ,  
Proteobacteria , POG51429.1 hypothetical protein  
BJU59\_05630, partial [Wolbachia sp. wRi\_2]"

gene                   4548..4859  
/locus\_tag="wEsol\_00132"

CDS                   4548..4859  
/locus\_tag="wEsol\_00132"  
/codon\_start=1  
/transl\_table=11  
/product="hypothetical protein"  
/pfam="UbiD"  
/tigr="TIGR00148 TIGR00148 438 UbiD family decarboxylase"  
/translation="MKFPAAAVIGSDPAKIIAAVTPVPETLSEYQFAGLLRKKPLELV  
NCKTIPLQVPAHAEIVLEGYVSLDRYQDEGPYGDHTGYYSVEQFPEFNITAITNRI  
I"  
/cog="UbiD COG0043 477 3-polyprenyl-4-hydroxybenzoate  
decarboxylase and related decarboxylases"  
/besthit="qcoverage 98.0582524271845 , hcoverage  
61.9631901840491 , similarity 97.0 , identity 96.0 ,  
evaluate 1.54e-62 , alnlength 101 , Bacteria ,  
Proteobacteria , EAL58158.1  
3-octaprenyl-4-hydroxybenzoate carboxy-lyase, partial  
[Wolbachia endosymbiont of Drosophila ananassae]"

gene                   complement(5313..5666)  
/locus\_tag="wEsol\_00133"

CDS                   complement(5313..5666)  
/locus\_tag="wEsol\_00133"

```

/codon_start=1
/transl_table=11
/product="hypothetical protein"
/translation="MDPVLFLSDAARYSSSAFASYVRTNIKWNLDLALIRISTRHNKSF
PRWSGLVPERTGSAFGNIDNTPQQQQQPQSQHRGSELSFPSNDNCDRRRGTMGRYGQK
VEVLVTGTCTRIDVYP"

```

# ORIGIN

```

1  gcagcatact gaatgggaat tctaccacta ttatctttaa tttttaaaact actttttttca
61  cctaccacaa gatatttttac tacattttagc tcgcccccat aagcagcaca atgcataaga
121 gttcggccat cgctatactt agcacttaag ctagctcttt gacttacaag atcttcaact
181 ttgctaagat ttccataattg tgctgcaatc aataattctt tatctaattg cactcgtttt
241 aaatactcta caatattatt gtgtttttga tcagtagcaa tatccagcaa tgtttttaccg
301 cttttgtctt gagtgtaaac gtcagcccc ttatctacga ggtaccttac taaatccatc
361 atcaatgctc attcctttgc tgagaaaaaa atctataatg tctttgttat tgttttcagc
421 ggcaatgtgt ataggaattc tgccaaaaat gttctcagcg ttaatatcag cacccttttc
481 tattaanaag ttagcaactt ctaacaagcc tctccatgca gcaaaatgta gcggtgtcca
541 accattttta tactcagttg agcagagctc acagagtata ttaattttga ttggataacg
601 gttggttgta catatataaa ggaatcgaga tagatataga cttccatata tcaaaaataat
661 caggatcgaa aaaaaatttg attgagccat gtccgtccgt ccgtccgtcc gtccgtccgt
721 taacacgata acttgagtaa attttgaggt atcttgatga aatttggtat gtaggttcct
781 gagtactcat ctcatatcgc tatttaaaat gaacgatatc ggactataac cagccact
841 ttttcgatat cgaaaatttc gaaaaaccga aaaagtgcga taattcatta caaaagacag
901 ataaagcgac gaaacttggg agatggggtg acgttatgac gcagaataga aaattagtaa
961 gattttggac aatgggctgt gcaccgcca cttttacaag aaggtaattt aaaagttttg
1021 caagctgtaa tttggcagtc gttgaagata tcatgatgaa atttggcagg aacgttacta
1081 ctattactct atatgtgcta aataaaaatt agcaaaaactg gatgaagaac acgcccactt
1141 tttaaaaaaa atttttttta attcaaattt taacaaaaaa tttaatatct ttactgtata
1201 taagtaaatt aagtcaaaat tcaactccag taatgatatg atgcaacaaa atacaaaaat
1261 aaaagaaaat ttcaaaatgg gcgtggctcc gccattttc atttagtttg tctagaatac
1321 ttttattgcc ataagtcgaa caaaaattta ccaatccttc tcaaatttgg taggagcata
1381 gattctatga caataactgt tctctgtgaa aatgggcgaa atcgggtggaa gccacgcca
1441 gtttttatac acagtcacc gtctgtcctt ccgtcggcc gttaacacaa taacttgagc
1501 aaaatccgat atatctttac taaacttagc ccacgtactt acctgaactc actttttctt
1561 ggtataaaaa atgggcgaaa tctgaccata accacgcca ctttatcgat atcgaaaatt
1621 acgaaaaatg aaaaaaatgc cataattcta taccaaatac gaaaaaaggg atgaaacatg
1681 gtaactggat tggttttattg acgcaaaaata taactttgga aaaaactttg taaaatgggt
1741 gtgacaccta ccatgttaag tagaagaaaa tgaaaaagtt ctacaaggcg caatcaacag
1801 cccttggaat cttggcagga atactgttag tggatttgca tatataaata tattagcagt
1861 acccgacaga tgattttctg gatcacctgg tccacatttt ggtcgatata gcgagaacgc
1921 cttcacatat acatctaagg gccactcgct tttaaaacc tcattaatac ctttaatttg
1981 atatccatat cgtacaaaaa cataccagag tccccctgt cccaccctaa tggcgatata
2041 tcgaaaaggc gtccacctat agacctaatg cccactccct cttaaaatgc tcagtaacac
2101 ctttcgtttg ataccatat cgtacaaaca ttctagagtc acccctggcc caccctaattg
2161 gcgatatact gaaaaggcgt ccacctatag acctagtgtc cactccctct taaaatgctc
2221 agtaacacct ttcgtttgat acccttatcg tacaaacatt ctagagtcac ccctggccca
2281 tcctaattgg gatatactcga aaaggcgctc acctatagac ctaatgtcca ctccctctta
2341 aaatcctcag taacagcttt cgtttgatac ccatatcgta caaacattct agagtcaccc
2401 ctggcccatc ctaatggcga tatctcgaag aggcgtccac ctgtagacct aatgccact
2461 ccctcttaaa atgctcagta acacctttcg tttgatacc atatcgtaca aacattctag
2521 agtcacacct ggcccaccct aatggcgata tttcgaaaag gcgtccacct atagaactaa
2581 ggattactcc cttttaaaat actcattacc acctttcatt tgatacccat atcgtacaaa
2641 cacattctag agtcaccctg gccacccta atggcctgaa gtgtggctgg atgcattaca
2701 acaattaaca cttgctattg ataacacaca tgagaatgaa cacattgtct tattttttga
2761 tgaacttcca tggtttagcta caagaaagtt tcgttttcta ggaacgttag aatatatttg
2821 gaatatacat tggacaaacc gaaagaagct tatcttggtt gtatgtgggt cagcagcttc
2881 ttggatgttg gaaaatataa tttataccaa aaggggggtt gcataaccgc attaccgcaa
2941 ggataacttt gcagcctttt aacttacgtg aaactaaaga gtatctaaga tatttaggaa
3001 tcaaccttaa tcaccagcag atattacaga tctatatggc tattggagga atgaatacca
3061 cattacctta aggaagtaag taaaggatta tcagcagcac aaacatttaa tatgatctgt
3121 tttcagaagg gtggtttgtt atttgatgaa tttgatatgt tgtttcactc cttgtatgaa

```

```

3181 gagacagaca catatcaaaa tatcattcgt gcgattgcaa aaaagccaaa agggataagc
3241 agaaaagaac ttataaaaagt cactaaaatt actgagggtg gtcgcttaac tgataaatta
3301 aggagtttag aagaagcaga atttattggt ggtttttttac cattgaacaa gggaaagaga
3361 ggagtatat acagggtaat ggacgaatat gtattathtt atctaactg gattgagccg
3421 tttaaggaag taacaaaaag ggcaataata agttatgctc actattggga gtttagcaata
3481 aagaaaccag cttggcaaac atggacaggg caaacatttg aagcagtgtg ttttaaacad
3541 gccaatgtaa ttagaaaaaa ttagatatag agcatatagc agttatatgt ggagattggc
3601 aatatcaacc agaaaaatac agtaaagagt ctggtgctca aatagatcta gttttcgatc
3661 gagaagatgg atgtgtaatg ctcatgaga taaaatatag tgataaacct tatacagtaa
3721 caaaggaatt tgtcgaacaa ttaaaaagaa aagaagcaat ttatagagaa aaaacgaaat
3781 caaagaagca aatattttgg gtgttaattg ctgcaaatgg agtttctgag aaccaatatc
3841 taaaagatac gatacatcat gtgattacac tagaagactt gttttaagtt attttaaatt
3901 ttaatatgta caccaactta cgcgacttca ttaaaagcctt agaagaagaa aagatctgat
3961 taggattaag gaggaagttt caacagttct tgaaatgaca gaaattcacc gtagggtttt
4021 gtcaaataaa ggaccagcta tcatctttga aaatgttgct acggaaaacg gtaaaaattc
4081 gattccagtt ttggtgaatt tatttcgtac tattaagagg attgcattgg gggtgaacat
4141 aaaccctggt gaactaagag atcttggtta aatttttagca tttttgcat cacctgagcc
4201 accaaaaaac ttcaaatgat cctgtaaaat gtttccttta ctaaaagtgt tattgtcgat
4261 gcgaagtaaa gttgtgagca aggtccatg tctagaagtg gtgctaactg gggatgaggt
4321 ggatcttagt ttgtaccta ttcaaatgat ctggccaaat gaacctgcac cacttatcac
4381 ctggccaatt gtggtgacaa aaggcccaac ggaagacaag gaagataatt tcaatcttgg
4441 aatatatcgt atgcaggtta tagataaaaa aaacgactct aatgcgctgg cttgcacatc
4501 gtggtggtgc aggtcaccac aaacgatgga aagagaagga acaaaatatg aaatttcctg
4561 ctgctgctgt gatcggtagt gatcctgcaa aaattattgc tgcggtaact ccagtgccag
4621 aaacattgtc agaataccaa tttgctgggt tgctgcgcaa aaaaccgctt gagcttgtaa
4681 attgtaagac tattccgctt caagtgccag ctcatgcaga gattgttctg gaaggctatg
4741 taagtttgga tagatatcaa gatgaagggc catacggtga tcacaccggc tactataatt
4801 ctggtgagca atttccagaa ttaaatatta ctgcaattac tacgaaccga ataatttaaa
4861 attttttttag ataaataaga taaaaaaggc acatcccttt aagcttgtaa tacagtagac
4921 gttcctatca ggttggccgg gttgaaagaa ggcgggcgtt gcacatggac agaaaagaga
4981 tagaaccaag catgaagtgc aaaaagtcaa agttcatgct caggtcttac aaccttagac
5041 aaggtgctat ttgtctcaat atatcgattc tttttcgatg tgtgcctccc gagacgctgg
5101 gaagtgcatt gccaaaaaag aggcataagg acatccgata ggtaaaagggt ctcggatgag
5161 atttctttat tctaaaaaca accacgacaa acgctttaag gatagattct gccttggcag
5221 aatgacaata gggcattacg cgtcaaatgt tggtgtaggg ataaagactc ttgccgaagt
5281 ttgtcggggg gttatcgatg ttgatggtct tttcatggat atacatcgat ccggcacgtt
5341 ccggtacaaa gcacctcaac cttctggcca taccgccccca ttgttccacg acgtctatcg
5401 caattatcat tagaagggaa gctcaattca gagccacgat gttggctttg ggggtgttgt
5461 tggtgttggg gagtggtatc gatgttgccg aatgcagatc cgttacgttc cgttaccaag
5521 cccgaccatc tcggaaacga tttgttatgt ctggttgaga tacgtatcaa ggcgaggtca
5581 ttccatttaa tattggttcg cacatagctc gcaaaagccg atgaggaata tcgcgctgca
5641 tctgataaga acaacactgg atccatttga gcaacagagt tgactgcact aatttttttt
5701 tgatttcaga ttatagttag aactggaccc ataggattca agggattttt aagcgcaata
5761 cgaaaactta tagct

```

//

```

LOCUS      JAQZAU010000014      1413 bp      dna      linear      ENV 17-MAR-2023
DEFINITION MAG: Wolbachia pipientis isolate wEsol contig_15719, whole genome
            shotgun sequence.
ACCESSION  JAQZAU010000014 JAQZAU010000000
VERSION    JAQZAU010000014.1
DBLINK     BioProject: PRJNA929258
            BioSample: SAMN33142973
KEYWORDS   WGS; ENV; Metagenome Assembled Genome; MAG.
SOURCE     Wolbachia pipientis (insect metagenome)
ORGANISM   Wolbachia pipientis
            Bacteria; Pseudomonadota; Alphaproteobacteria; Rickettsiales;
            Anaplasmataceae; Wolbachieae; Wolbachia.
REFERENCE  1 (bases 1 to 1413)
AUTHORS    Fiutek,N., Couger,B.M., Roy,S., de la Torre,J.R. and Connor,E.F.
TITLE      Genomic assessment of the contribution of the Wolbachia

```

endosymbiont of *Eurosta solidaginis* to gall-induction

JOURNAL International Journal Molecular Sciences

REFERENCE 2 (bases 1 to 1413)

AUTHORS Fiutek,N., Couger,B.M., Roy,S., de la Torre,J.R. and Connor,E.F.

TITLE Direct Submission

JOURNAL Submitted (10-FEB-2023) Biology, San Francisco State University, 1600 Holloway Ave, San Francisco, CA 94132, USA

COMMENT ##Genome-Assembly-Data-START##  
 Assembly Date :: JUN-2019  
 Assembly Method :: FLYE v. 06-2019  
 Genome Representation :: Full  
 Expected Final Version :: Yes  
 Genome Coverage :: 100.0x  
 Sequencing Technology :: Illumina HiSeq; PacBio Sequel  
 ##Genome-Assembly-Data-END##

FEATURES

source Location/Qualifiers  
 1..1413  
 /organism="Wolbachia pipientis"  
 /mol\_type="genomic DNA"  
 /submitter\_seqid="contig\_15719"  
 /isolate="wEsol"  
 /isolation\_source="galls on Solidago altissima"  
 /host="Eurosta solidaginis MN-2018-EFC"  
 /db\_xref="taxon:955"  
 /environmental\_sample  
 /country="USA: Cowling Arboretum, Carleton College, Northfield, MN"  
 /lat\_lon="44.48 N 93.13 W"  
 /altitude="280 m"  
 /collection\_date="2018-11"  
 /metagenome\_source="insect metagenome"  
 /note="metagenomic"

gene <1..582  
 /locus\_tag="wEsol\_00134"

CDS <1..582  
 /locus\_tag="wEsol\_00134"  
 /codon\_start=1  
 /transl\_table=11  
 /fullproduct="qcoverage 100 , hcoverage 90.1869158878505 , similarity 100 , identity 100 , evaluate 2.12e-134 , alnlength 193 , Bacteria , Proteobacteria , WP\_141457257.1 MULTISPECIES: hypothetical protein [unclassified Wolbachia]"  
 /translation="EDCTLVPESFFYKSVHYVDNVLGPVKDVICGVESKDDYNKYKNNDNCEYVGYRAEKVYSLCALSAILAANIILQPLFLIVACLSYFPVKLLSKITGDYCFKTDTKSFVNYSNIFLEMGQDCANAVARVFNKIVSYACAAIIWAAASIITPLVWACDKVQSKLSEVQKPEKHQFLSKDNSKTTSVNGIPQTEL"  
 /product="hypothetical protein"  
 /besthit="qcoverage 100 , hcoverage 90.1869158878505 , similarity 100 , identity 100 , evaluate 2.12e-134 , alnlength 193 , Bacteria , Proteobacteria , WP\_141457257.1 MULTISPECIES: hypothetical protein [unclassified Wolbachia]"

gene 698..1408  
 /locus\_tag="wEsol\_00135"

CDS 698..1408  
 /locus\_tag="wEsol\_00135"  
 /codon\_start=1  
 /transl\_table=11  
 /fullproduct="qcoverage 100 , hcoverage 100 , similarity

100 , identity 100 , evalue 2.17e-148 , alnlength 236 ,  
 Bacteria , Proteobacteria , WP\_015589276.1 MULTISPECIES:  
 ComF family protein [unclassified Wolbachia]"  
 /cog="ComFC COG1040 225 Predicted  
 amidophosphoribosyltransferases"  
 /pfam="FYVE DUF1258 Pribosyltran"  
 /tigr="TIGR00201 comF 190 comF family protein"  
 /product="ComF family protein"  
 /translation="MNLLLLKKATNLIFPSVCVSCECIIDENLNLCSCECNKKINFLTK  
 HYCNVCGVVISDNIYTCGKCIINPPPFKVLRSVFAYDQHSKNMIINFKFFDNLNYVKI  
 YAKWIHQANQDTFQNAEVVIPIPLHKMRLFKRKYNQAALLAKELTKLSNLSYTPFAIK  
 RPRHTIPQAGLSLKQREKNLKKAFSISNKKIENKIVILVDDVVTGATVRSCSQEIL  
 NSGAREVRVLSLARTVAC"  
 /besthit="qcoverage 100 , hcoverage 100 , similarity 100  
 , identity 100 , evalue 2.17e-148 , alnlength 236 ,  
 Bacteria , Proteobacteria , WP\_015589276.1 MULTISPECIES:  
 ComF family protein [unclassified Wolbachia]"

# ORIGIN

```

1 gaagattgca cactagttcc agaaagtagt ttctataagt ccgtacatta cgttgataat
61 gtgctaggac ctgtgaaaga tgtaatttgt ggagttgaga gtaaagatga ttataacaag
121 tattataaaa acaatgataa ttgtgaatac gtgggttaca gagcagagaa agtgtattca
181 ttgtgtgcac tgagtgtcat tttagcagcc aacataatat tgcaaccttt atttttgata
241 gtggcatggt tgtcatactt tccagtcaag ttattgtcaa aaataacagg ggactattgt
301 tttaaaacgg atacaaaatc attcggttaat tattcaaaca tattttttaga aatgggggcaa
361 gattgtgcta atgcagtagc tagagtattht aacaagattg taagttatgc ttgctgtgct
421 atcatttggg ctgccgcgtc aatcataacg ccacttgtgt gggcttgtga caaagtgcaa
481 agtaagttga gtgaagtaca gaagccagaa aaacatcaat ttttatctaa ggataattca
541 aagactactt cagtcaatgg tataccacaa actgagttat aagttctgct tttcagcagc
601 atgaactata ttgaaatgga ataaaaagtg aaagagtgtg agcttaagtt acttttagcta
661 tactatataa attatthttat aatataattht atgagttgtg aaccttctct tactaaaaaa
721 agtacaatat ctcatattht caagcgtatg cgtaagttgc gaatgtatca ttgatgaaaa
781 tcttaaatctg tgtagtgaat gcaacaaaaa aatcaattht ctaactaagc attactgcaa
841 tgthttgtggc gtagtaatct cagacaatat ttatacgtgt ggtaagtgca tcatcaatcc
901 tccaccgttht aaagtattaa gatcagthtt tgcttatgat caacatagta aaaacatgat
961 tataaathtt aaaththttg ataathttgaa ttacgtaaaa atctatgcaa agtggataca
1021 ccaagctaath caggatacgt ttcagaacgc agaggtcgtg attcctatac cgttacataa
1081 aatgcgttht tthaaacgta aatataatca agcagcactg cttgcaaaaag agttgactaa
1141 gttatccaath ttatcctata cgccatttht aataaaaacgt cctcgccata ctatccctca
1201 ggctggtctt tcacttaagc agcgtgaaaa aaatthtaaag aaggctthtt gcataagcaa
1261 caagaaaath atcgaaaata aaatcgtagt attagttgac gacgtagtaa caactggagc
1321 aactgtaagg tcctgtctct aagaaathtt aaatthtggg gcaagagaag tgagagtgct
1381 atcgcttgca agaacggtag catgttaaaa cgt

```

//

LOCUS JAQZAU010000015 2282 bp dna linear ENV 17-MAR-2023  
 DEFINITION MAG: Wolbachia pipientis isolate wEsol contig\_15818, whole genome  
 shotgun sequence.  
 ACCESSION JAQZAU010000015 JAQZAU010000000  
 VERSION JAQZAU010000015.1  
 DBLINK BioProject: PRJNA929258  
 BioSample: SAMN33142973  
 KEYWORDS WGS; ENV; Metagenome Assembled Genome; MAG.  
 SOURCE Wolbachia pipientis (insect metagenome)  
 ORGANISM Wolbachia pipientis  
 Bacteria; Pseudomonadota; Alphaproteobacteria; Rickettsiales;  
 Anaplasmataceae; Wolbachieae; Wolbachia.  
 REFERENCE 1 (bases 1 to 2282)  
 AUTHORS Fiutek,N., Couger,B.M., Roy,S., de la Torre,J.R. and Connor,E.F.  
 TITLE Genomic assessment of the contribution of the Wolbachia  
 endosymbiont of Eurosta solidaginis to gall-induction  
 JOURNAL International Journal Molecular Sciences

REFERENCE 2 (bases 1 to 2282)

AUTHORS Fiutek,N., Couger,B.M., Roy,S., de la Torre,J.R. and Connor,E.F.

TITLE Direct Submission

JOURNAL Submitted (10-FEB-2023) Biology, San Francisco State University, 1600 Holloway Ave, San Francisco, CA 94132, USA

COMMENT ##Genome-Assembly-Data-START##

Assembly Date :: JUN-2019

Assembly Method :: FLYE v. 06-2019

Genome Representation :: Full

Expected Final Version :: Yes

Genome Coverage :: 100.0x

Sequencing Technology :: Illumina HiSeq; PacBio Sequel

##Genome-Assembly-Data-END##

FEATURES

source Location/Qualifiers

1..2282

/organism="Wolbachia pipientis"

/mol\_type="genomic DNA"

/submitter\_seqid="contig\_15818"

/isolate="wEsol"

/isolation\_source="galls on Solidago altissima"

/host="Eurosta solidaginis MN-2018-EFC"

/db\_xref="taxon:955"

/environmental\_sample

/country="USA: Cowling Arboretum, Carleton College, Northfield, MN"

/lat\_lon="44.48 N 93.13 W"

/altitude="280 m"

/collection\_date="2018-11"

/metagenome\_source="insect metagenome"

/note="metagenomic"

gene 38..403

/locus\_tag="wEsol\_00136"

CDS 38..403

/locus\_tag="wEsol\_00136"

/codon\_start=1

/transl\_table=11

/pfam="DDE\_Tnp\_1\_5"

/fullproduct="qcoverage 100 , hcoverage 100 , similarity 100 , identity 100 , evalue 1.05e-83 , alnlength 121 , Bacteria , Proteobacteria , WP\_155969141.1 MULTISPECIES: transposase [Wolbachia]"

/translation="MPQKMRVSNCHEYNKFLQERGSIFCYINDAIENWYENCPKMQGG NYIYSDKVVILVHIIVSFFRIGLRQTVGFIKGYLQQIGRDLAVISYSQASRRFKKLNI KINDCRIDKNIALSIKVRM"

/product="transposase"

/besthit="qcoverage 100 , hcoverage 100 , similarity 100 , identity 100 , evalue 1.05e-83 , alnlength 121 , Bacteria , Proteobacteria , WP\_155969141.1 MULTISPECIES: transposase [Wolbachia]"

gene 437..817

/locus\_tag="wEsol\_00137"

CDS 437..817

/locus\_tag="wEsol\_00137"

/codon\_start=1

/transl\_table=11

/fullproduct="qcoverage 100 , hcoverage 100 , similarity 100 , identity 100 , evalue 3.88e-86 , alnlength 126 , Bacteria , Proteobacteria , AOV87628.1 transposase [Wolbachia endosymbiont of Drosophila incompta]"

/cog="COG3415 COG3415 138 Transposase and inactivated"

```

derivatives"
/pfam="HTH_Tnp_IS630 HTH_23 HTH_28 HTH_29 CENP-B_N HTH_7
HTH_23"
/product="transposase"
/translation="MPAAYSIDLRRKKAMEALDEGESRETVAARFKIGRTTLWEWQRR
KETGDFQSKKLGNGGYNHKITDWDTFAKFAREHGGKTLSEMAKLWNNVSIQTIYALK
KIGFTRKKRHMDTRKETKKNVLNF"
/besthit="qcoverage 100 , hcoverage 100 , similarity 100
, identity 100 , evalue 3.88e-86 , alnlength 126 ,
Bacteria , Proteobacteria , AOV87628.1 transposase
[Wolbachia endosymbiont of Drosophila incompta]"
gene 814..1143
/locus_tag="wEsol_00138"
CDS 814..1143
/locus_tag="wEsol_00138"
/codon_start=1
/transl_table=11
/product="hypothetical protein"
/pfam="DDE_3"
/translation="MKIIATKEPKNLVYIDESGIDNTEDYPYGYCQKGQRFYALKSGK
KTQRISMVAALSGRKIVVPLTFEGHCNMDVFNGWVEQFLTPILEPGQTDLTQKKWRER
KEFFWVK"
/besthit="qcoverage 84.4036697247707 , hcoverage
69.1729323308271 , similarity 98.9 , identity 98.9 ,
evalue 1.75e-61 , alnlength 92 , Bacteria ,
Proteobacteria , EAL58695.1 putative transposase
[Wolbachia endosymbiont of Drosophila ananassae]"
gene 1162..1344
/locus_tag="wEsol_00139"
CDS 1162..1344
/locus_tag="wEsol_00139"
/codon_start=1
/transl_table=11
/product="hypothetical protein"
/pfam="HTH_Tnp_1 HTH_23 HTH_28"
/translation="MAREYTAEFKLEAVKLTNEQRKVGQPVAKVARDLGIRDSVLGKW
MKKYNEKSQRQMHFQM"
/cog="COG2963 COG2963 116 Transposase and inactivated
derivatives"
/besthit="qcoverage 85 , hcoverage 70.83333333333333 ,
similarity 100 , identity 100 , evalue 8.30e-26 ,
alnlength 51 , Bacteria , Proteobacteria , WP_094189595.1
transposase, partial [Wolbachia endosymbiont of
Drosophila ananassae]"
gene 1877..2041
/locus_tag="wEsol_00140"
CDS 1877..2041
/locus_tag="wEsol_00140"
/codon_start=1
/transl_table=11
/fullproduct="qcoverage 100 , hcoverage 100 , similarity
100 , identity 100 , evalue 4.17e-28 , alnlength 54 ,
Bacteria , Proteobacteria , WP_156768661.1 MULTISPECIES:
hypothetical protein [Wolbachia]"
/cog="Tra5 COG2801 232 Transposase and inactivated
derivatives"
/pfam="rve"
/product="hypothetical protein"
/translation="MSSSINKQLVMDSLLMVAVNKRKPAKNLLHSDQGSQYTSQGYQY
LLSIKNIDES"

```

```

        /besthit="qcoverage 100 , hcoverage 100 , similarity 100
        , identity 100 , evalue 4.17e-28 , alnlength 54 ,
        Bacteria , Proteobacteria , WP_156768661.1 MULTISPECIES:
        hypothetical protein [Wolbachia]"
gene      2031..2195
        /locus_tag="wEsol_00141"
CDS       2031..2195
        /locus_tag="wEsol_00141"
        /codon_start=1
        /transl_table=11
        /fullproduct="qcoverage 100 , hcoverage 100 , similarity
        100 , identity 100 , evalue 5.23e-31 , alnlength 54 ,
        Bacteria , Proteobacteria , WP_080717614.1 MULTISPECIES:
        IS3 family transposase [Wolbachia]"
        /cog="Tra5 COG2801 232 Transposase and inactivated
        derivatives"
        /pfam="rve_3 rve rve_2"
        /product="IS3 family transposase"
        /translation="MSHKGCCYDNSVVESFFSSLKREILIDTSQHSAQQTRTAIFEYI
        EIFYNKQRHY"
        /besthit="qcoverage 100 , hcoverage 100 , similarity 100
        , identity 100 , evalue 5.23e-31 , alnlength 54 ,
        Bacteria , Proteobacteria , WP_080717614.1 MULTISPECIES:
        IS3 family transposase [Wolbachia]"
gene      complement(2196..>2282)
        /locus_tag="wEsol_00142"
CDS       complement(2196..>2282)
        /locus_tag="wEsol_00142"
        /codon_start=1
        /transl_table=11
        /product="hypothetical protein"
        /translation="LTLPRKSGEKVWNVFHKENDESKCSGMQ"

```

#### ORIGIN

```

1  tcattataaa tagccattta actgttgaag aaaaaatatg ccacaaaaaa tgagagtcag
61 taactgccat gaatataaca aattttctcca agaaagagga agcatttttt gttatatcaa
121 tgacgccata gaaaatttgt acgagaattg tccaaaaaatg cagggcgcca actatattta
181 tagtgataaa gttgtgattt tgggtgcata aatcgtcagt ttcttttagaa ttggtttaag
241 acaaacagtc ggggtttataa aagggtatth gcaacaaata ggaagagatt tggcagttat
301 cagctattca caagcatcaa gaaggtttaa gaaacttaat attaagataa atgattgcag
361 aattgataaa aatatagctc tttccataaa agtccggatg tgataggata agggtagatg
421 atgataagga gggttgatgc cagcagcata tagttatgat ttaagaaaaa aagcaatgga
481 agcgctagac gaaggagaaa gcagagaaac agtggcagca agatttaaga ttggacgaac
541 tacttttatg gagtggcagc aaagaagaaa agaaacagga gactttcaat caaaaaaact
601 tggaaatggg gggttacaatc acaaaattac cgactgggat acctttgcc aatttgccag
661 agaacacgga ggaaagactc tatcggaat ggctaaactt tggaacaacg ttagtatcca
721 aacgatctat cgagccctta aaaaaattgg atttacgcgc aaaaaagac atatggatac
781 aaggaaagaa acgaagaaaa acgtgctgaa tttttgaaaa ttatagcgac aaaagaacct
841 aaaaacttag tgtatataga tgagtctggc attgataaca ccgaagacta cccctacgga
901 tattgccaga aaggacagcg gttttatgcc ttaaaatctg gaaagaaaac tcaacgaatc
961 agtatggttg cagccttaag tggagaaaag atagttgttc cgttaacctt tgaaggccac
1021 tgtaatattg atgtttttta tggatgggtt gagcaattht tgacaccgat cttggaacct
1081 ggacagactg accttaccga gaaaaagtgg agagaaaaga aggagtthtt ttgggtaaaa
1141 taaaattttg gaggattaga aatggcaaga gaataacgg cagaattcaa attggaagct
1201 gttaagctga caaatgaaca aagaaaggta ggtcaaccag ttgcaaaagt agcaagagat
1261 ctaggaataa gggatagtgt attaggaaaa tggatgaaga aatataacga aaaaagtcag
1321 cggcaaattg atttccagat gtagcacctt atgacaaaaga gagatttgat ttacaaagca
1381 aaagtaacaa gagaaagaga catttttaaaa aaagccctgg ccagtcaaaa agagtaaaat
1441 atttttttat atagtaactg ctataaagta caggaattat gtaggatttt ctgctagtgg
1501 ctactataag tggaccacaa gaaaaataag cagtagagaa tcagcaaata aagagctact
1561 cgcagctatt caaaaaatat atcaagtttc taaatgtaga tatggagctc ctaaaattca

```

```

1621 tgctgaattg aaggcttttg gtaaaagttg caacttaaaa acagtgcaaa gtattatgca
1681 gaaaaatggt attcaggcta tattgagaag aaaattttaa attaagaaac aacaaacgga
1741 cagtagctcc caatatatta gaccaaact ttattgtcga tcaaccaa ataatgtggg
1801 attacttata taaaaaccaa agaaggatgg ctatatgttg caacaataat cgatctatat
1861 tcacgcatgg tagttaatga gcagttcaat aaataaacia ttgggttatgg actctttatt
1921 aatggccgtt aacaagcgta aacctgccaa aaatctacta ttacatagtg atcaagggtc
1981 acaatatact tcgcaagggt atcaatatct cttatccata aaaaacatag atgagtcata
2041 aaggttggtt ttacgacaat tctgttggtg aaagcttctt tagctcattg aaaagagaaa
2101 tactttattg tacttcacaa cactctgctc aacaaactag aactgcaata tttgaataga
2161 tagaaatttt ttataacaaa caacgtcact attactatt gcattcctga gcattttgat
2221 tcatcattct ctttgtgaaa aacattccaa actttctctc cactttttct gggttaaggtc
2281 ag

```

//

```

LOCUS      JAQZAU010000016      1465 bp      dna      linear      ENV 17-MAR-2023
DEFINITION MAG: Wolbachia pipientis isolate wEsol contig_16892, whole genome
            shotgun sequence.
ACCESSION  JAQZAU010000016  JAQZAU010000000
VERSION    JAQZAU010000016.1
DBLINK     BioProject: PRJNA929258
            BioSample: SAMN33142973
KEYWORDS   WGS; ENV; Metagenome Assembled Genome; MAG.
SOURCE     Wolbachia pipientis (insect metagenome)
ORGANISM   Wolbachia pipientis
            Bacteria; Pseudomonadota; Alphaproteobacteria; Rickettsiales;
            Anaplasmataceae; Wolbachieae; Wolbachia.
REFERENCE  1  (bases 1 to 1465)
AUTHORS    Fiutek,N., Couger,B.M., Roy,S., de la Torre,J.R. and Connor,E.F.
TITLE      Genomic assessment of the contribution of the Wolbachia
            endosymbiont of Eurosta solidaginis to gall-induction
JOURNAL    International Journal Molecular Sciences
REFERENCE  2  (bases 1 to 1465)
AUTHORS    Fiutek,N., Couger,B.M., Roy,S., de la Torre,J.R. and Connor,E.F.
TITLE      Direct Submission
JOURNAL    Submitted (10-FEB-2023) Biology, San Francisco State University,
            1600 Holloway Ave, San Francisco, CA 94132, USA
COMMENT    ##Genome-Assembly-Data-START##
            Assembly Date      :: JUN-2019
            Assembly Method    :: FLYE v. 06-2019
            Genome Representation :: Full
            Expected Final Version :: Yes
            Genome Coverage    :: 100.0x
            Sequencing Technology :: Illumina HiSeq; PacBio Sequel
            ##Genome-Assembly-Data-END##
FEATURES   Location/Qualifiers
            source      1..1465
                        /organism="Wolbachia pipientis"
                        /mol_type="genomic DNA"
                        /submitter_seqid="contig_16892"
                        /isolate="wEsol"
                        /isolation_source="galls on Solidago altissima"
                        /host="Eurosta solidaginis MN-2018-EFC"
                        /db_xref="taxon:955"
                        /environmental_sample
                        /country="USA: Cowling Arboretum, Carleton College,
                        Northfield, MN"
                        /lat_lon="44.48 N 93.13 W"
                        /altitude="280 m"
                        /collection_date="2018-11"
                        /metagenome_source="insect metagenome"
                        /note="metagenomic"

```

```

gene      <1..108
          /locus_tag="wEsol_00143"
CDS       <1..108
          /locus_tag="wEsol_00143"
          /codon_start=1
          /transl_table=11
          /product="hypothetical protein"
          /translation="TNILSSIREGRPLTGRDGALTPFIKKLLEVSLEGE"
          /besthit="qcoverage 100 , hcoverage 43.2098765432099 ,
similarity 100 , identity 100 , evaluate 3.42e-15 ,
alnlength 35 , Eukaryota , Arthropoda , GFQ64109.1
mutator family transposase [Trichonephila clavata]"
gene      101..439
          /locus_tag="wEsol_00144"
CDS       101..439
          /locus_tag="wEsol_00144"
          /codon_start=1
          /transl_table=11
          /product="hypothetical protein"
          /pfam="Transposase_mut Pfam-B_11109"
          /translation="MNDRRNGRNAKTLRTSAGSFELLTPRDREGSFEPQIVKKRQTNL
HPELETKILSTFASGMGYRDIVSHVEEIYDHKISAAEISSITDKLLPVINEWRSRPLQ
SVYPIVFMVF"
          /cog="COG3328 COG3328 379 Transposase and inactivated
derivatives"
          /besthit="qcoverage 99.1071428571429 , hcoverage
63.0681818181818 , similarity 98.2 , identity 94.6 ,
evaluate 5.55e-68 , alnlength 111 , Eukaryota , Arthropoda
, GFQ83888.1 mutator family transposase [Trichonephila
clavata]"
gene      474..1073
          /locus_tag="wEsol_00145"
CDS       474..1073
          /locus_tag="wEsol_00145"
          /codon_start=1
          /transl_table=11
          /fullproduct="qcoverage 96.9849246231156 , hcoverage
87.3303167420815 , similarity 99.5 , identity 99.0 ,
evaluate 2.98e-135 , alnlength 193 , Eukaryota , Arthropoda
, CAD7417219.1 unnamed protein product [Timema
poppensis]"
          /cog="COG3328 COG3328 379 Transposase and inactivated
derivatives"
          /pfam="Transposase_mut MULE DDE_Tnp_IS240 DDE_Tnp_ISL3
DDE_Tnp_ISL3 DDE_Tnp_IS240"
          /product="IS256 family transposase"
          /translation="MYNILGIDQNGKKEVLGFYLAESEGANFWLGVNLDLKERGVEDI
LIACVDGLKSFPAAINSVFPNAEVQMCIVHQIRNSLKYMASKDAKSFLSDLKKVYQAS
SKEIAENYLLELDEKWTGKYPVVIKSWQNNWENLSGYFKYSGPVRRIIYTTNPIEGLH
RQIRKFTKTKGSFTSINALYKQVYCAIKKAEGKVDDACT"
          /besthit="qcoverage 96.9849246231156 , hcoverage
87.3303167420815 , similarity 99.5 , identity 99.0 ,
evaluate 2.98e-135 , alnlength 193 , Eukaryota , Arthropoda
, CAD7417219.1 unnamed protein product [Timema
poppensis]"
gene      complement(1190..>1465)
          /locus_tag="wEsol_00146"
CDS       complement(1190..>1465)
          /locus_tag="wEsol_00146"
          /codon_start=1

```

/transl\_table=11  
/product="hypothetical protein"  
/translation="ATGGNNTDKETHFSHQLEQKTRQEGINASASATVYTDREIPTS  
N  
QSEQKVQQEIINTSTSTAPVLQIHIDKEIPSSSARTKNNTTKRNTKKIN"

ORIGIN

```
1  acaaatatcc tgtcgtctat acgagaagga agaccgttga caggaagaga tggagcatta
61 acaccgttta taaaaaagtt gctggaggta agcctggaag gtgaatgata gaagaaatgg
121 gaggaatgca aagactttac gtacaagcgc agggtcattt gagcttttga cgccaagaga
181 tagggaagga agtttcgaac cacaaatagt caaaaaaagg caaacaactt tacatccaga
241 gcttgaaacg aagattttga gcacatttgc cagtggatg ggctatagag atatatgtgc
301 acatgttgag gaaatttatg atcacaaaat atcggcggca gagatatcaa gtattactga
361 caaattgcta ccagtaatca acgaatggcg tagtcgcccg ctgcagtctg tatatccgat
421 agttttcatg gtttttttaa gtcaaagagg acgggcattg cgtaagtaaa tgcattgata
481 acatattagg catagatcaa aatggcaaaa aagaagtatt aggtttttat ttggctgaaa
541 gtgaaggagc taacttctgg ttgggagtg taaatgacct caaagaaaga ggagtagaag
601 atatccttat tgccgtcggt gatgggctga aaagctttcc tgcagctata aacagtgtct
661 ttcctaatac ggaagtgcag atgtgtatag tgcattcagat acgcaactca ctgaagtata
721 tggccagtaa agatgcgaag agttttttga gcgattttaa gaaggtatat caagcttcaa
781 gcaaggaaat tgccgagaat tatctgttgg aattggatga aaaatggggc acaaagtacc
841 ctatggttat aaaatcttgg cagaataatt gggaaaactt gtctggttat tttaagtatt
901 ctgggtccagt taggaggata atctacacca ccaatcccat agaggggcta cataggcaaa
961 ttaggaaatt cactaagacc aaaggctcat ttaccagcat aaatgccttg tataagcagg
1021 tatattgtgc tataaagaag gcagagggaa aagtggacga tgcctgtaca tgattgggca
1081 ttaactatct ctcaacttga tgttttctt cctggcagat tgaaaattga gttgaactaa
1141 aaatgctatt tgacacagtt tatttaacac tccctctttc ttgtaattat taattaattt
1201 tttttgtatt tctttttgtt gtgttttttg ttcttgctga tgaggaaggg atttctttat
1261 ctatgtgaat ttgtaaaacc ggcgcactag tactgggtatt aattatttct tgttgactt
1321 tttgctctga ttgattagaa gtaggaattt ctctatccgt ataaacagtc gcactagcgc
1381 tggcattaat tccttcttgt cgtgtttttt gctctagtgt atgagaaaaa tgggtttctt
1441 tatccgtatt gttacccccg gttgc
```

//

LOCUS JAQZAU010000017 10077 bp dna linear ENV 17-MAR-2023  
DEFINITION MAG: Wolbachia pipientis isolate wEsol contig\_17836, whole genome  
shotgun sequence.  
ACCESSION JAQZAU010000017 JAQZAU010000000  
VERSION JAQZAU010000017.1  
DBLINK BioProject: PRJNA929258  
BioSample: SAMN33142973  
KEYWORDS WGS; ENV; Metagenome Assembled Genome; MAG.  
SOURCE Wolbachia pipientis (insect metagenome)  
ORGANISM Wolbachia pipientis  
Bacteria; Pseudomonadota; Alphaproteobacteria; Rickettsiales;  
Anaplasmataceae; Wolbachieae; Wolbachia.  
REFERENCE 1 (bases 1 to 10077)  
AUTHORS Fiutek,N., Couger,B.M., Roy,S., de la Torre,J.R. and Connor,E.F.  
TITLE Genomic assessment of the contribution of the Wolbachia  
endosymbiont of Eurosta solidaginis to gall-induction  
JOURNAL International Journal Molecular Sciences  
REFERENCE 2 (bases 1 to 10077)  
AUTHORS Fiutek,N., Couger,B.M., Roy,S., de la Torre,J.R. and Connor,E.F.  
TITLE Direct Submission  
JOURNAL Submitted (10-FEB-2023) Biology, San Francisco State University,  
1600 Holloway Ave, San Francisco, CA 94132, USA  
COMMENT ##Genome-Assembly-Data-START##  
Assembly Date :: JUN-2019  
Assembly Method :: FLYE v. 06-2019  
Genome Representation :: Full  
Expected Final Version :: Yes  
Genome Coverage :: 100.0x  
Sequencing Technology :: Illumina HiSeq; PacBio Sequel

```

##Genome-Assembly-Data-END##
FEATURES             Location/Qualifiers
     source            1..10077
                        /organism="Wolbachia pipientis"
                        /mol_type="genomic DNA"
                        /submitter_seqid="contig_17836"
                        /isolate="wEsol"
                        /isolation_source="galls on Solidago altissima"
                        /host="Eurosta solidaginis MN-2018-EFC"
                        /db_xref="taxon:955"
                        /environmental_sample
                        /country="USA: Cowling Arboretum, Carleton College,
                        Northfield, MN"
                        /lat_lon="44.48 N 93.13 W"
                        /altitude="280 m"
                        /collection_date="2018-11"
                        /metagenome_source="insect metagenome"
                        /note="metagenomic"
     gene              complement(404..1003)
                        /locus_tag="wEsol_00147"
     CDS                complement(404..1003)
                        /locus_tag="wEsol_00147"
                        /codon_start=1
                        /transl_table=11
                        /pfam="OMP_b-brl"
                        /fullproduct="qcoverage 100 , hcoverage 99.0049751243781
                        , similarity 100 , identity 100 , evaluate 1.52e-137 ,
                        alnlength 199 , Bacteria , Proteobacteria ,
                        WP_015588785.1 MULTISPECIES: OmpA-like protein
                        [unclassified Wolbachia]"
                        /translation="MKRLCALAVLLTSSLAGTANNSASKSEDQYYAGLNFGAGWGGGL
                        KIKPSVVFGYHHDKNSKFELEVLTDISDMFGKEEKKMGASLLANYRYPNLDIDPVKL
                        YVSGGLGGYLQVIPFGFGNSGTSEPASKDIEAAGEKASVVDKILGSISYKLVGVVDYE
                        IAPQIVGTVGITAGGQLSGFKPPVQIPDAILEVGIRYNF"
                        /product="OmpA-like protein"
                        /besthit="qcoverage 100 , hcoverage 99.0049751243781 ,
                        similarity 100 , identity 100 , evaluate 1.52e-137 ,
                        alnlength 199 , Bacteria , Proteobacteria ,
                        WP_015588785.1 MULTISPECIES: OmpA-like protein
                        [unclassified Wolbachia]"
     gene              complement(1128..3578)
                        /locus_tag="wEsol_00148"
     CDS                complement(1128..3578)
                        /locus_tag="wEsol_00148"
                        /codon_start=1
                        /transl_table=11
                        /fullproduct="qcoverage 100 , hcoverage 100 , similarity
                        100 , identity 100 , evaluate 0.0 , alnlength 816 ,
                        Bacteria , Proteobacteria , WP_141456805.1 MULTISPECIES:
                        leucine--tRNA ligase [unclassified Wolbachia]"
                        /cog="LeuS COG0495 814 Leucyl-tRNA synthetase"
                        /pfam="tRNA-synt_1d tRNA-synt_1 tRNA-synt_1f tRNA-synt_1g
                        tRNA-synt_1e tRNA-synt_1 tRNA-synt_1_2 tRNA-synt_1
                        tRNA-synt_1 tRNA-synt_1 tRNA-synt_1g Anticodon_1"
                        /tigr="TIGR00396 leuS_bact 843 leucine--tRNA ligase"
                        /product="leucine--tRNA ligase"
                        /translation="MKYDFKSVEKFYQDKWDFSVSKSGKQEKCYVLEMFPYPSPGKIHM
                        GHLRNYAIGDVIARYKRANGFEVLHPIGWDAFGLPAENAARDNNISPETWTKENIDNM
                        RTQLKSIGLSYNWERELSTCEPDYKHEQKFFLDFLKHGLAYRKESWVNWDVPDQTVL
                        ANEQVVDGKGWRSGAVVEKRKLSQWFLKITDFAEDLLKCLQSLKNWPEKVKTMQERWI

```

```

GKSEGV TIDFEIVGLNKKLKIFTTSPHTWFGASFFAVAAEHPIVQDLKDKEIRDFIDG
MKAKEENDEKIGVYTGLNVKHPFLDKELPLYIANFVLM EYGEGAI FGC PAHDQRDFEF
AQKYDLPVIPVICEKGAQAIVTLEEAYTGGEIMCNSEFLNGLTVSEAKEV I IKKLKEK
GIGEKTTNYRLHDWGISRQRYWGCPIPIIYCRDCGTVPVPEKDLPVVLPDVEFTSGG
NPLDKHPTWK FVDCPKCGKQAERETDTFDTFFESSWYFAAFCSEDKSIDKDACNRFMP
VDYYIGGIEHAILHLLYSRFFCRALTKCGYFDIKEPFSTLITQGMVCHATYKDENGKW
LFPAAEAKELIAQGAQVQVGKVEKMSKSKKNTVDPNFII EKYGADTARLFVLS DTPPEK
DMEWSDDGVEGCSRYVNKLWRMVMQLKPVNMHYDNKSVTGGLLEYRKKIHKLLHGLTD
DLENCRLNCVVAKFREMTNLIAEIDVAAGKSLINEGICILIRVIEPFMPHLAESLWQE
IGGQWPWKADESLLVDDTVTI AVQINGKL RATIEVA INLPQEELKKIAIDSVSSKIDQ
NKVRTVYAVPNKIVNIVI"
/besthit="qcoverage 100 , hcoverage 100 , similarity 100
, identity 100 , evalue 0.0 , alnlength 816 , Bacteria ,
Proteobacteria , WP_141456805.1 MULTISPECIES:
leucine--tRNA ligase [unclassified Wolbachia]"
gene complement(3591..4187)
/locus_tag="wEsol_00149"
CDS complement(3591..4187)
/locus_tag="wEsol_00149"
/codon_start=1
/transl_table=11
/pfam="Peptidase_M23 RnfC_N"
/fullproduct="qcoverage 100 , hcoverage 100 , similarity
100 , identity 100 , evalue 2.02e-141 , alnlength 198 ,
Bacteria , Proteobacteria , WP_006279879.1 MULTISPECIES:
M23 family metallopeptidase [Wolbachia]"
/translation="MWHIASFLMLLAILIGCGLQKPAPVLLKGEEFYGKRDLEYTREY
HLIREPSVQKESRKAIINRIYKDNNTQN VGVNCKFVMPVKGSATSSDEMCKDGKIA
AQNGTNVSSAPGKVIYVGKGLRWYGNLIIVEHKDNYMTVYSYLKNIHVEIGDKVKQG
QVIGSAGKSSTQDKDPQMCFTIRHNGQAVDPLMHMNCN"
/product="M23 family metallopeptidase"
/besthit="qcoverage 100 , hcoverage 100 , similarity 100
, identity 100 , evalue 2.02e-141 , alnlength 198 ,
Bacteria , Proteobacteria , WP_006279879.1 MULTISPECIES:
M23 family metallopeptidase [Wolbachia]"
gene complement(4233..4559)
/locus_tag="wEsol_00150"
CDS complement(4233..4559)
/locus_tag="wEsol_00150"
/codon_start=1
/transl_table=11
/pfam="HTH_17 MerR_1 MerR"
/fullproduct="qcoverage 100 , hcoverage 100 , similarity
100 , identity 100 , evalue 2.52e-69 , alnlength 108 ,
Bacteria , Proteobacteria , WP_006279880.1 MULTISPECIES:
MerR family transcriptional regulator [Wolbachia]"
/translation="MNKEKLFYTGIEVAEELHLEQHVLRFWEGQFHQIKPTKRKGRRL
YDRKCIEAIKKVKYMLYDKGYTIKGVQKEFGNDIKVTKNLLQELTDLRDYLTSKINNE
ESNKQA"
/product="MerR family transcriptional regulator"
/besthit="qcoverage 100 , hcoverage 100 , similarity 100
, identity 100 , evalue 2.52e-69 , alnlength 108 ,
Bacteria , Proteobacteria , WP_006279880.1 MULTISPECIES:
MerR family transcriptional regulator [Wolbachia]"
gene complement(4559..4864)
/locus_tag="wEsol_00151"
CDS complement(4559..4864)
/locus_tag="wEsol_00151"
/codon_start=1
/transl_table=11

```

```

/fullproduct="qcoverage 100 , hcoverage 100 , similarity
100 , identity 100 , evalue 2.51e-59 , alnlength 101 ,
Bacteria , Proteobacteria , WP_006279881.1 MULTISPECIES:
integration host factor subunit alpha [Wolbachia]"
/cog="HimA COG0776 94 Bacterial nucleoid DNA-binding
protein"
/pfam="Pfam-B_95 Bac_DNA_binding"
/tigr="TIGR00987 himA 96 integration host factor, alpha
subunit"
/product="integration host factor subunit alpha"
/translation="MDHVTTKDTTVTKATIAGDINQEIGLSKEDSVSIIDDILDEIKT
SLVKDGIVKISSFGTFLVKKKKKERPGNIPNTSEKVMIQARNSVSFRPSKIIKKSINN"
/besthit="qcoverage 100 , hcoverage 100 , similarity 100
, identity 100 , evalue 2.51e-59 , alnlength 101 ,
Bacteria , Proteobacteria , WP_006279881.1 MULTISPECIES:
integration host factor subunit alpha [Wolbachia]"
gene complement(4925..6103)
/locus_tag="wEsol_00152"
CDS complement(4925..6103)
/locus_tag="wEsol_00152"
/codon_start=1
/transl_table=11
/fullproduct="qcoverage 100 , hcoverage 100 , similarity
99.7 , identity 99.7 , evalue 6.97e-262 , alnlength 392 ,
Bacteria , Proteobacteria , WP_155968857.1 MULTISPECIES:
MFS transporter [Wolbachia]"
/pfam="MFS_1 MFS_1_like"
/tigr="TIGR00886 2A0108 368 nitrite transporter"
/product="MFS transporter"
/translation="MESRAKAWFIWLISNLVVIFSNMQIIYTFISVNLEKELGLTIAQ
VALANSAYTWTFAILQFFSGATFNVFSSKKIYFFSLSTMILGFFVLINSDFNSHLILS
QVLIATGASFGFIGAAHTSSICFSAAQFGLMFSLVQTISSLSALVIQILFNSLLAEDA
YWKNLIVCIIILFGVLIFVLTFLCPNTLPESSEKRTIKSSMKTVMCSILTTLVLRDIW
ITSVVGAITFGTFLALNTLWAPRLLGNSELNAMESGIATAILWLGLAVGAPIADRISN
LFKNRKHVISAFALLQGVSIIIILLYSHLTVHVVFYFCMLMFGFFAGGHMLNFTVVGSEIV
KRKYISTSSSIINGFMFIGSGVIVSMLALFTDHKMALFAILIVAGILNYATKETYSKK
"
/besthit="qcoverage 100 , hcoverage 100 , similarity 99.7
, identity 99.7 , evalue 6.97e-262 , alnlength 392 ,
Bacteria , Proteobacteria , WP_155968857.1 MULTISPECIES:
MFS transporter [Wolbachia]"
gene complement(6475..8013)
/locus_tag="wEsol_00153"
CDS complement(6475..8013)
/locus_tag="wEsol_00153"
/codon_start=1
/transl_table=11
/fullproduct="qcoverage 100 , hcoverage 100 , similarity
100 , identity 100 , evalue 0.0 , alnlength 512 ,
Bacteria , Proteobacteria , AGJ99536.1 Putative cytosol
aminopeptidase [Wolbachia endosymbiont of Drosophila
simulans wHa]"
/cog="PepB COG0260 485 Leucyl aminopeptidase"
/pfam="Peptidase_M17_N Peptidase_M17"
/product="Putative cytosol aminopeptidase"
/translation="MKNILLMFLLCFMYSLQLFATEIPAMKITISKISPDKTIVMGL
FEDNETVNDGGVLQGKQVIDNIKQFSDFNGSFGEFFSTALPEEKNVIVVGLGKKDEWN
ENKELNIGGKIYCELSRLKIKKAAVLIEGSAANVAYGAFLRSFKFDKYKTKKDEKITE
VEEITVLVKDEQLSNAERSFEHLRQEGESIFLARSFITEPPNIIYPESYADHIKKELT
KLGLEIEVLDDKKQMEKKMGALLGVAQGSSKEPKLVVIKWNNGASKEQKPIAFVVGKIT

```

```

FDTGGVSLKPSRGMESMKYDMAGSATVVGVMHALAGRKAKVNAIGVVALAENAVGGNA
QRPSDVVTSMSGQTIEVLNTDAEGRLLILADALWYTQDRFSPKFMIDLATLTGAIVVAL
GNNEYAGLFSNNDELANRLIDAGNEVNEKLWRFPMNETYDKIIDSPIADVQNIAPAGS
GGDSIMAAQFLQRFVNETCWAHLDIAGTAWHEKGTDICPRGAVGFGVRLNKLVEKYY
EAND"
/besthit="qcoverage 100 , hcoverage 100 , similarity 100
, identity 100 , evaluate 0.0 , alnlength 512 , Bacteria ,
Proteobacteria , AGJ99536.1 Putative cytosol
aminopeptidase [Wolbachia endosymbiont of Drosophila
simulans wHa]"
gene complement(8074..8715)
/locus_tag="wEsol_00154"
CDS complement(8074..8715)
/locus_tag="wEsol_00154"
/codon_start=1
/transl_table=11
/fullproduct="qcoverage 100 , hcoverage 100 , similarity
100 , identity 100 , evaluate 5.98e-155 , alnlength 213 ,
Bacteria , Proteobacteria , WP_015588781.1 MULTISPECIES:
protocatechuate 3,4-dioxygenase [unclassified Wolbachia]"
/cog="PcaH COG3485 226 Protocatechuate 3,4-dioxygenase
beta subunit"
/pfam="Dioxygenase_C"
/product="protocatechuate 3,4-dioxygenase"
/translation="MNVKNILLAFVLVQMVFSLPFAADPVLLNCIETPEIYDLDPK
NFNSSNNLRRKPGSPNSAIGELIHIVGRITDINCLPIQNAVVSIIWHANSRGVNHYDKN
IEDDLNFAGSGRFVNNLGYNFITIA PGKIGDRAPHINFLVQHPDFEFTTQMFFAD
HNCDCNADPVLEDFVSNGLASLLITPFTYSQVIKTYTFNITLGGYNKFSNKR"
/besthit="qcoverage 100 , hcoverage 100 , similarity 100
, identity 100 , evaluate 5.98e-155 , alnlength 213 ,
Bacteria , Proteobacteria , WP_015588781.1 MULTISPECIES:
protocatechuate 3,4-dioxygenase [unclassified Wolbachia]"
gene 9146..9574
/locus_tag="wEsol_00155"
CDS 9146..9574
/locus_tag="wEsol_00155"
/codon_start=1
/transl_table=11
/pfam="Pfam-B_3816 DUF972 Pfam-B_4504 Pfam-B_3314 DivIC
HALZ Pfam-B_1653 Pfam-B_3883 Pfam-B_17409"
/fullproduct="qcoverage 100 , hcoverage 100 , similarity
99.3 , identity 98.6 , evaluate 6.00e-75 , alnlength 142 ,
Bacteria , Proteobacteria , QEF50519.1 putative
transposase [Wolbachia endosymbiont of Drosophila
ananassae]"
/translation="MVNLLELCKNLQQKIEKLKAEIENLKAENKALKIENAEKLERLG
LNSKNSSLPSSKELYKTKKDKPKSERNVGDQVGKGNFHATMEADKVVKIELPNICEC
GGELVICEKPYVHQVDLPEIRPYVVIGTWSLLEMQKKKK"
/product="putative transposase"
/besthit="qcoverage 100 , hcoverage 100 , similarity 99.3
, identity 98.6 , evaluate 6.00e-75 , alnlength 142 ,
Bacteria , Proteobacteria , QEF50519.1 putative
transposase [Wolbachia endosymbiont of Drosophila
ananassae]"
gene 9531..9821
/locus_tag="wEsol_00156"
CDS 9531..9821
/locus_tag="wEsol_00156"
/codon_start=1
/transl_table=11

```

```

/fullproduct="qcoverage 100 , hcoverage 100 , similarity
97.9 , identity 95.8 , evaluate 3.40e-57 , alnlength 96 ,
Bacteria , Proteobacteria , RLT63249.1 putative
transposase [Wolbachia endosymbiont of Drosophila
ananassae]"
/translation="MEHGRCWRCRKRKSSKLPEGVTPDTFGPRVKSIIAALSGFYKNS
KREVASIINDIFNLNISVGSISNLTITHKYEVRQVAILLLDQRNVSTLSKE"
/product="putative transposase"
/besthit="qcoverage 100 , hcoverage 100 , similarity 97.9
, identity 95.8 , evaluate 3.40e-57 , alnlength 96 ,
Bacteria , Proteobacteria , RLT63249.1 putative
transposase [Wolbachia endosymbiont of Drosophila
ananassae]"
gene complement(9869..>10077)
/locus_tag="wEsol_00157"
CDS complement(9869..>10077)
/locus_tag="wEsol_00157"
/codon_start=1
/transl_table=11
/product="hypothetical protein"
/translation="GTAERLMRYLTVMSIIAWRIFFITSIARTNPTLPCTALLAEFEW
KVLVVKIHRKPCSNIAPTIKEAVS"
/besthit="qcoverage 100 , hcoverage 74.7252747252747 ,
similarity 97.1 , identity 97.1 , evaluate 5.28e-39 ,
alnlength 68 , Bacteria , Proteobacteria , CDR78440.1
hypothetical protein WPAU_0041 [Wolbachia endosymbiont of
Drosophila simulans wAu]"

```

#### ORIGIN

```

1  ggattcatat  tttttgcctt  gaccaagaaa  aaattcagct  attgccttac  tttctcttgc
61  aacaacttct  tccttaacaa  tttttccttt  ctcatcaacg  atacttataa  aagtttcttt
121 tagtgagatc  gctataatat  tccatgagac  tgctcctact  aataaaagtt  taaattatct
181 ttgaagaact  tattctactg  aattcgttac  ttcgtgctaa  aataatggac  tccatcattc
241 aacagcaatt  acagtatggt  tacccttttt  cttgttatct  ttctaatact  tagtcagcgt
301 tcaaaaccat  attcgaaaag  tatctcatat  atttccagat  ttttttaatt  ctgtttatct
361 catcctcaac  attgcctcta  cctttatgaa  ctaagtagca  gcattaaaaa  ttataacgta
421 ttcctacttc  tagaatcgcg  tccggtatct  gtactggtgg  tttaaagcca  cttagtgtcc
481 cgcttgcggt  aataccaact  gtaccaacta  tctgtggagc  aatttcataa  tcaacaccga
541 cttttagttt  ataggaaata  gaaccagta  ttttatctac  tacagatgcc  ttctctccag
601 cagcttcaat  atctttgctt  gcaggttcac  ttgtaccact  gttaccaaag  ccaaaaggta
661 ttacttgtag  gtatcctcct  aaacctccgc  taacatatag  cttaacggga  tcaatatcaa
721 ggttagggt  ataacggtaa  tttgctaata  agctagcccc  cattttcttt  tcttctttac
781 caaacatata  acttatgtca  gtgagaacct  caagttcaaa  cttagagtgt  ttgtcatgat
841 gataacaaaa  aacaacgcta  ggttttattt  ttaagccacc  acccatcca  gcaccaaagt
901 ttaaacctgc  ataatactga  tcttctgact  tacttgcact  attattagct  gtacctgcta
961 gagatgaagt  gagcaacaca  gctaaagcac  ataactcttt  cattttcata  taactcctca
1021 taaaaaaaaa  tatataatgc  ataagtatat  atcctttata  ttaaaaaaga  tataatcgca
1081 tgtaaaaaag  agtataacca  tgaagtcaaa  gatgcgctac  ggatttttta  tataactata
1141 ttactatct  tatttggtac  agcatataca  gtgcgaactt  tgttttgatc  gatcttactg
1201 gacacagagt  ctatcgctat  tttcttcaat  tcttcttgag  gtaagttaat  tgccacttcg
1261 attgtcgcac  gcaactttcc  attgatctgc  actgctatag  ttaccgtatc  gtcaactaat
1321 aatgattcat  cagcttttgg  ccaagggtga  cctcctatct  cttgccatag  gctttcagct
1381 aatgcggca  taaatgggtc  gattactctg  attagtatgc  atataccttc  attaataaga
1441 gattttccag  ctgctacgtc  tatttcagct  attaaattcg  tcatttcacg  aaattttgcc
1501 actacacagt  ttaatctgca  gttttccaag  tcatctgtaa  gtccatgtaa  gagtttatga
1561 attttttttc  tgtactctag  aagtccaccc  gtaacacttt  tgttatcata  gtgcatattc
1621 acaggcttaa  gctgcatgac  catagccac  aatttatcta  cataacgaga  acaaccttc
1681 acaccatcat  cggaccattc  catatctttc  tctggaggag  tgtcagacaa  cacaaacaag
1741 cgggcagtat  cagcaccata  cttttctatg  ataaaatttg  gatcaactgt  gttctttttc
1801 gatttgctca  ttttctcgac  ttttccaact  tgaaccttag  ctcttgtgac  aatcaactct
1861 tttgcttctg  cgggaaatag  ccacttacca  ttttcgtctt  tataagttgc  atggcgagcc

```

|      |             |             |             |             |             |             |
|------|-------------|-------------|-------------|-------------|-------------|-------------|
| 1921 | attccttgag  | tgattaaagt  | agagaaaggc  | tctttaatat  | caaaatagcc  | acatttggtt  |
| 1981 | aaagcacggc  | agaaaaatcg  | tgagtaaagc  | aaatgcagaa  | ttgcatgctc  | tatcccacct  |
| 2041 | atataataat  | caacaggcat  | aaaacgatta  | catgcatctt  | tgtctattga  | tttatcttca  |
| 2101 | ctacagaatg  | cagcaaaata  | ccaggaagac  | tcaaaaaagg  | tgtcgaatgt  | atcagtttca  |
| 2161 | cgctctgctt  | gctttccaca  | ttttgggcaa  | tcaacgaact  | tccaagttgg  | gtgtttatca  |
| 2221 | agcggattac  | caccacttgt  | aaattccaca  | tctgttggtg  | gaactacagg  | aaggctcttt  |
| 2281 | tctggtagtg  | gaacagttcc  | gcagtctctg  | caatatatga  | taggtatagg  | gcatcccaa   |
| 2341 | taacgttgctc | tcgaaattcc  | ccaatcatgt  | aaacgatagt  | ttgttgtttt  | ctcacctatc  |
| 2401 | cctttttctt  | tgagcttttt  | aatgattact  | tcctttgctt  | cactaaccgt  | caatccattt  |
| 2461 | aagaattcgag | agttgcacat  | tatttcgccc  | ccagtgtagg  | cttcttctag  | agtcactatg  |
| 2521 | gcttgatcac  | ccttttcaca  | aataacagga  | ataaccggca  | aatcgtattt  | ctgtgcaa    |
| 2581 | tcaaaatcac  | gctgatcatg  | tgcagggcac  | ccaaaaatcg  | cgccttcccc  | atattccatc  |
| 2641 | aacacaaaat  | tcgctatgta  | aagcggcaat  | tccttatcaa  | gaaatggatg  | cttgacgttt  |
| 2701 | aatccggtgt  | aaactcctat  | tttttcgcta  | ttttcctcct  | ttgctttcat  | gccatcgata  |
| 2761 | aagtctcgta  | tttctttgtc  | cttaagatcc  | tgcacaatag  | ggtgttctgc  | tgctaccgca  |
| 2821 | aaaaaagaag  | ctccaaacca  | agtatgagga  | gaagttgtaa  | aaatctttta  | tttcttattt  |
| 2881 | aagccaacta  | tttcaaaatc  | tatagttacc  | ccttcagatt  | ttcctatcca  | acgctcctgc  |
| 2941 | attgttttga  | ccttttctgg  | ccaatttttc  | aaactttgca  | gacacttgag  | taaatcttca  |
| 3001 | gcgaaatcag  | taatctttta  | aaaccactgg  | gataacttac  | gtttttcaac  | aacggcgcct  |
| 3061 | gaccgccatc  | cctttccatc  | aaccacctgt  | tcatttgcaa  | gcactgtttg  | gtccactgga  |
| 3121 | tcccagttaa  | cccatgattc  | ttttcgatag  | gcaagcccat  | gctttaaaaa  | atccaggaaa  |
| 3181 | aattttttgtt | cgtgtttgta  | ataatcaggc  | tcacatgtgg  | agagttcacg  | ctcccaatta  |
| 3241 | taagaaagac  | ctatagattt  | caactgtgta  | cgcataattat | ctatattctc  | ttttgtccat  |
| 3301 | gtttcggggc  | taatattgtt  | atccccttgc  | gcattctcag  | ctggtaatcc  | aaacgcatcc  |
| 3361 | cagccaattg  | gatgcaaaac  | ctcaaatcca  | ttagctctct  | tgtaacgcgc  | tatcacatcc  |
| 3421 | cctattgcat  | agttacgtaa  | gtgtcccata  | tgaattttac  | cagatggata  | tggaaacatt  |
| 3481 | tccaacacgt  | aacacttttc  | ttgtttacca  | ctcttgctta  | cagaaaaatc  | ccatttatct  |
| 3541 | tgataaaaatt | tttcaacact  | tttaaaatca  | tatttcatat  | aaatccaaat  | tcaattacag  |
| 3601 | ttcatatgca  | tcaaaggatc  | aaccgcttgg  | ccattatgtc  | gtattgtgaa  | acacatctgt  |
| 3661 | ggatctttat  | cttgtgtgct  | tgattttacct | gcagatccaa  | ttacttgacc  | ttgctttact  |
| 3721 | ttatcgccaa  | tttcaacatg  | tatgtttttt  | aaataggagt  | acacagtcac  | gtaattatct  |
| 3781 | ttgtgttcca  | ctataattaa  | attcccatac  | catctcagcc  | ccttgccctac | atatatcact  |
| 3841 | ttgcctggtg  | cagaggaaac  | tacgttcggt  | ccatttttgag | cagcaatttt  | tatgccatcc  |
| 3901 | ttacacattt  | catcagaaga  | ggtagctgaa  | cctttaactg  | gcattacaaa  | tttacaattt  |
| 3961 | acccccacat  | tttgtgtatt  | attgttatct  | ttgtatatcc  | tatttatgat  | ggcttttcta  |
| 4021 | ccttcttttt  | gcactgaagg  | ctcccctaatt | aaatggtact  | ctcttgata   | ttccagatct  |
| 4081 | ccttttccgt  | aaaattcttc  | gcctttaagc  | agcacagggtg | cagggtttttg | caggccacag  |
| 4141 | cctattaata  | ttgctaataa  | cataagaaat  | gaggctatat  | gccacatttt  | aaactctcac  |
| 4201 | aaaactccaa  | aatttttagcg | agacgtagtg  | tttcacgcct  | gcttgttact  | ttcctcgtta  |
| 4261 | tttatttttac | tagttaaata  | gtccctcaaa  | tcgggtgagtt | cttgcaacaa  | attctttgtg  |
| 4321 | actttttatat | cattaccaaa  | ttctttttgc  | actcctttta  | ttgtatatcc  | tttatcatat  |
| 4381 | agcatgtatt  | ttactttctt  | tatggcctct  | atacacttgc  | gatcatatag  | ccttcttccct |
| 4441 | ttacgctttg  | taggcttaat  | ttgatgaaat  | tgaccttccc  | aaaatctcaa  | aacatgctgt  |
| 4501 | tccaaatgta  | gctcttcagc  | tacttcccca  | atcgtataaa  | ataatttttc  | cctgttcatt  |
| 4561 | aattattgat  | tgattttttt  | ataatttttg  | aaggcctaaa  | agaaactgaa  | tttcttgccct |
| 4621 | gaatcatcac  | tttctccgat  | gtatttggtg  | tatttcctgg  | tctttccttc  | tttttcttaa  |
| 4681 | ccaagaatgt  | tccaaatgac  | gatattttta  | ctattccatc  | cctttaccaag | cttgtcttta  |
| 4741 | tttcgtccaa  | tatatcatct  | attatcgaaa  | cagagtcttc  | ccttgataat  | cctatttctt  |
| 4801 | ggtttatatc  | tccagctatc  | gttgcccttag | ttactgttgt  | gtcttttgg   | gtaacgtgat  |
| 4861 | ccattattga  | taaatattac  | aatacgtaaa  | tataatatag  | caatcgactc  | gagattcagc  |
| 4921 | tactttatatt | tttagagtat  | gtctcttttg  | ttgcataatt  | taaaataccg  | gcaactatca  |
| 4981 | atattgcaaa  | aagtgccatt  | ttatgatctg  | taaaaagtgc  | taacattgac  | actataactc  |
| 5041 | cactgccaat  | aaacataaat  | ccattgataa  | tggatgatga  | tgtgctgatg  | tattttcggt  |
| 5101 | tcacaatctc  | gctgccgaca  | gtaaaattaa  | gcataatgtcc | tcccgcaaaa  | aacccgaaca  |
| 5161 | ttaacataca  | aaagtacaca  | acgtggactg  | ttaaatggct  | gtatagtaaa  | ataataattg  |
| 5221 | agacgccttg  | caataaagca  | aaagcagaaa  | ttacatgttt  | cctattttta  | aataagtttg  |
| 5281 | agattcgatc  | tgcaattgga  | gcaccaactg  | caagaccaag  | ccatagtatt  | gcagttgcta  |
| 5341 | tacctgactc  | cattgcattg  | agttctgagt  | tgcccagtaa  | ccttgagacc  | cacaaggtat  |
| 5401 | taagtgctaa  | aaatgttcca  | aaagtaatag  | caccaccac   | tgaagttatc  | cagatatctc  |
| 5461 | ttaatttttag | cactgttaat  | atagagcaca  | ttactgtctt  | catagagctt  | tttattgtgc  |

|      |             |             |             |             |             |             |
|------|-------------|-------------|-------------|-------------|-------------|-------------|
| 5521 | gcttttctga  | gctgctttct  | ggaagtgtgt  | ttggacaaaa  | aagcgtaagt  | acaaatatca  |
| 5581 | acacacccaa  | tagtattatg  | catacaatca  | gattttttcca | atatgcatct  | tcggcaagca  |
| 5641 | agttagagaa  | cagtatttga  | attaccaaaag | cagaaaggct  | tgaaattgtc  | tgactagtgt  |
| 5701 | aaaacattag  | tccaaattgg  | gcagcggaaa  | aacatatgct  | acttgtgtga  | gcagcaccaa  |
| 5761 | taaaacccaa  | tgatgctcca  | gttgcaatca  | acacttgaga  | caaaatcaaa  | tgggagaaat  |
| 5821 | tgctactatt  | aataaggaca  | aaaaacccca  | agatcatagt  | tgataacgag  | aaaaaataaa  |
| 5881 | tttttttact  | ggaaaaaaca  | ttaaacgttg  | ctccactaaa  | aaattgtaag  | atggcgaaag  |
| 5941 | tccaagtata  | tgctgaatta  | gccagtgcga  | cttgcgcgat  | tgtaagtcca  | agttcctttt  |
| 6001 | cgagattttac | acttataaag  | gtataaatta  | tctgcatggt  | gctgaatata  | acaaccaagt  |
| 6061 | tactaatcag  | ccaaatgaac  | caagccttag  | ctctgctttc  | cataagattt  | atttttataa  |
| 6121 | gtaatctatt  | agaaatttaa  | cactaagtct  | ctttttaagc  | tattgtttcc  | tgactactgt  |
| 6181 | tatagctaac  | ccaaaaaacg  | gtttccctac  | gtcatgccgc  | cgcggtatct  | ctagatcccg  |
| 6241 | ctaacaagca  | gcgggatgac  | gagcttatcg  | tcacgccgcc  | acgaaccgtc  | ataccgcgat  |
| 6301 | tcattcgcg   | tatctcagcc  | gctaacaagt  | agcgggatga  | cggttgtcag  | ggtgtcatga  |
| 6361 | aagtagctga  | cactggaatc  | cagaaaaaaa  | gaaatatgta  | tcagctactt  | tcatttgctg  |
| 6421 | cgcctcgaaa  | ataaacgttc  | atgtagctaa  | gccataaatc  | cagtataaag  | acctttaatc  |
| 6481 | attggcttcg  | tagtacttct  | caaccaactt  | attaagtaac  | cttacaccaa  | aacctactgc  |
| 6541 | tcctcttgga  | caaatgtcag  | tacctttctc  | gtgccaaagca | gtgcctgcga  | tatctaaatg  |
| 6601 | tgcccagcaa  | gtttcattca  | caaaacgctg  | taaaaactgt  | gcagccatta  | tgctatctcc  |
| 6661 | accagagcct  | gcaggagcga  | tgttttgaac  | atcagcaatc  | ggtgaatcaa  | taattttgtc  |
| 6721 | ataagtttca  | ttcataggaa  | aacgccataa  | cttctcattt  | acttcatttc  | ctgcatcaat  |
| 6781 | cagacggttt  | gctaattcat  | cattatttga  | aaaaagacca  | gcataatcgt  | tatttccaag  |
| 6841 | tgcaaccact  | atagcaccag  | ttaaagttgc  | aagatcaatc  | ataaattttg  | gtgagaatct  |
| 6901 | atcttgcgta  | taccataaag  | catctgcaag  | tatgagcctt  | ccttctgcat  | cggtgttcaa  |
| 6961 | cacttctatt  | gtttgtccag  | acattgaagt  | tactacatca  | cttgggtctt  | gagcattacc  |
| 7021 | accactgca   | ttttctgcaa  | gtgcgaccac  | gccaatgca   | tttacttttg  | cttttcgtcc  |
| 7081 | tgctaaagca  | tgcatcacc   | caaccacagt  | agcagagcct  | gccatgtcat  | atttcacga   |
| 7141 | ctccatacca  | cgtgaagggt  | tgagtgatac  | tccaccagt   | tcaaacgtta  | tacctttacc  |
| 7201 | aacaaaagct  | ataggctttt  | gttctttaga  | agctccattc  | catttttatca | ctactaattt  |
| 7261 | tggttcttta  | ctacttcctt  | gtgcaactcc  | aagcaaggct  | cccatttttt  | tctcttccat  |
| 7321 | ctgcttttta  | tcaagcacct  | cgatttcaag  | gccaaagctta | gtaagttctt  | tttttatatg  |
| 7381 | atcagcatag  | gattctggat  | atagaatgtt  | aggaggtctt  | gttataaaaag | agcgcgcaag  |
| 7441 | aaatatactc  | tcaccttctt  | gccttaagt   | ctcaaagtat  | ctttcagcat  | tacttaattg  |
| 7501 | ttcatctttt  | actaatacgg  | taatctcctc  | tacctctgta  | attttctcat  | cctttttagt  |
| 7561 | tttatactta  | tcaaacttaa  | aactacgcag  | aaacgcacca  | tatgcaacat  | ttgctgcact  |
| 7621 | accttcgatt  | aaaaccgctg  | cttttttaat  | ttttaatctg  | cttagctcac  | aatataattt  |
| 7681 | accaccaata  | tttaattctt  | tattttcatt  | ccattcatcc  | ttcttacc    | gtccaacaac  |
| 7741 | tataacattt  | ttttcttctg  | gcaaagcagt  | agagaaaaat  | tcacccaaaac | ttccattgaa  |
| 7801 | atcgctaaat  | tgcttttatat | tatctatgac  | ctgttttcct  | tgcaaaaactc | cgccatcatt  |
| 7861 | tacggtttcg  | ttgtcttcaa  | ataaacccat  | tactattgtt  | ttaaaatcgg  | gcgaaatttt  |
| 7921 | agaaattgtt  | attttcattg  | ctggtatctc  | cgttgcaa    | aatgttaa    | tgtacataaa  |
| 7981 | acatagcaaa  | aacatcagta  | agatattttt  | catatacatc  | ctaagtacaa  | taacacttaa  |
| 8041 | gtttactatg  | gactccctta  | catgcaagg   | tttttatctt  | ttattagaga  | acttattata  |
| 8101 | tccgcccaag  | gtaatgttaa  | acgtatagg   | ttttatgacc  | tgatcactgt  | aagtaa      |
| 8161 | tgttatgaga  | aggcttgcaa  | gccattact   | aacaaaatct  | tcaagaacag  | gatcagcgca  |
| 8221 | attatcgcaa  | ttatggtcag  | caaaaaacat  | ttgcgttggt  | aattctggaa  | aatccggatg  |
| 8281 | ttgaactaga  | aagttgatat  | gtggagctct  | atcaccaatt  | ttaccagggt  | ctatcgtaat  |
| 8341 | aaaattataa  | tagccaagat  | tattcactac  | aaaccttcct  | gatccagcaa  | aattcagatc  |
| 8401 | atcctctata  | ttcttatcgt  | aatggttcac  | gccgcgtgaa  | ttcgcgtgcc  | atatagaaac  |
| 8461 | tacagcattt  | tgtattggta  | agcagtttat  | atcagtaatt  | ctaccacta   | tgtgtattaa  |
| 8521 | ttcccctatt  | gcactatttg  | gagaaccagg  | ttttcttctt  | aaattgtttg  | aagagttaaa  |
| 8581 | attttttggc  | cttgcatcaa  | ggtcatatat  | ttctggagtt  | tcaatgcagt  | tgagcaaaac  |
| 8641 | aggatcagct  | gcaaatacg   | gcaaactgaa  | taccatttgt  | actaaaaacg  | ctaataagat  |
| 8701 | atttttcaca  | ttcatttcat  | ttataataga  | cttcttgcat  | aaccatataa  | caaactttta  |
| 8761 | ttgggaatag  | aaacgaaaaa  | attactttac  | aaactccgcc  | agccctctta  | tcataaaaact |
| 8821 | gaaggtattc  | agttatcttc  | atctgtgcag  | attaaacagc  | aagaaaacaa  | cgtagttggc  |
| 8881 | gtcttatttt  | taattttttg  | cactatgtgc  | accttatgtc  | ttcacaatat  | ttctaggttt  |
| 8941 | ttacctacac  | aagctgaaac  | gcgcttataa  | gtcgttcaag  | acagtatagt  | acgccaattt  |
| 9001 | gcaggattag  | agagtgacaa  | ctagctaaca  | cggggtttct  | tttgcccttt  | tttctgttta  |
| 9061 | gtaaatgtga  | tccgttcagc  | ggagtggtag  | aataaggtag  | acaaagtgat  | ctaaaaagat  |



```

/altitude="280 m"
/collection_date="2018-11"
/metagenome_source="insect metagenome"
/note="metagenomic"
gene <1..1984
/locus_tag="wEsol_00158"
CDS <1..1984
/locus_tag="wEsol_00158"
/codon_start=1
/transl_table=11
/product="hypothetical protein"
/pfam="Pfam-B_2381 Pfam-B_13184 AAA_16 NB-ARC AAA_22
AAA_14 Ank_2 Ank_4 Ank_5 Pfam-B_1873 Ank Ank_4 Ank_3
Pfam-B_10896 Ank_5 Pfam-B_1714 Ank Ank_3 Ank_2 Ank_4
Ank_5 Ank Ank_3 Ank_4 Ank_2 Pfam-B_1873 Ank_5
Pfam-B_10896 Ank_3 Ank Ank_4 Ank_5 Ank Ank_3 Ank_5 Ank_2
Ank Ank_3 Ank_4"
/translation="WFGIIEPVASFTGRGRVLTALHNMLQRSAKKQAVISQVASISGL
GGVGKSELARKYTYKYGKDYVNAIWIDAESTETMKNSFLDLANNRLGIPTKDRHERD
KTIENTIVREVYAFFARRGRSLFIFDNAEGYEDIKRFLPSSLHPRHKKPYILITSRNK
DWRIAEDDEEKIKTIQLGVFKKTEAIRFVKRALNIKDNLQDEEIKKLIEELQYFPLALG
QAIAYINESNIVLSRRGEERVGVSDYLKRYEKEAEKLLDFESKYKSDRYTKTTFIawk
ITIDAIKRECGPEALKILEVMAYLAPDKIHIEEVFSKLIAEDKEKLWKAVELLDRYS
IIDLKKGVANIHLRVQKVTELNLQKAVREEEVLRKALELINSGDIAISHIVSIWEYAS
KYGKLIDDFYFNSSCIHRKPFFIKKSTPLHLLAASGDFKAIAKAILTHISTHFPGLIM
AVNVENNSGHAPLHFAVYNGRLDVVKYLVSKGADISAKSKDGSTLLHYAAQGGSLNVV
EYLIDEKGTDINIKDNDGTTPLHSVAYLGYLAVVKKFIEKGADINSRDIYYKTPLHLA
ASNSDLDVVEHLVNKGANVNAMDKDGLTPLHCAVFRENLEIVEYLAEKGVNTKNKDDD
TPLHFAAVMGKVAVAKILLKHNAADVNAKNNEGKTAL"
/besthit="qcoverage 100 , hcoverage 71.0441334768568 ,
similarity 99.5 , identity 99.5 , evaluate 0.0 , alnlength
660 , Bacteria , Proteobacteria , WP_155968791.1
MULTISPECIES: ankyrin repeat domain-containing protein
[Wolbachia]"
gene 2043..2423
/locus_tag="wEsol_00159"
CDS 2043..2423
/locus_tag="wEsol_00159"
/codon_start=1
/transl_table=11
/fullproduct="qcoverage 100 , hcoverage 100 , similarity
100 , identity 100 , evaluate 1.16e-87 , alnlength 126 ,
Bacteria , Proteobacteria , AOV87106.1 transposase
[Wolbachia endosymbiont of Drosophila incompta]"
/cog="COG3293 COG3293 124 Transposase and inactivated
derivatives"
/pfam="DUF4096"
/product="transposase"
/translation="MRKKYPTDLSEREWARIEKHFRVSYKKGGRPPKYSKREILEAIF
YVLRTGCQWRYLPNDFPLWKTVYEQFRQWKKQGIFEKMNIEITKYSRRKIGRNEQPSA
CIVDSQSVKTTEKGGSKAMMEVKK"
/besthit="qcoverage 100 , hcoverage 100 , similarity 100
, identity 100 , evaluate 1.16e-87 , alnlength 126 ,
Bacteria , Proteobacteria , AOV87106.1 transposase
[Wolbachia endosymbiont of Drosophila incompta]"
gene 2534..2875
/locus_tag="wEsol_00160"
CDS 2534..2875
/locus_tag="wEsol_00160"
/codon_start=1

```

```

/transl_table=11
/fullproduct="qcoverage 100 , hcoverage 100 , similarity
100 , identity 100 , evalue 1.53e-79 , alnlength 113 ,
Bacteria , Proteobacteria , AAS13810.1 transposase, IS5
family, OrfB [Wolbachia endosymbiont of Drosophila
melanogaster]"
/cog="COG3293 COG3293 124 Transposase and inactivated
derivatives"
/pfam="DDE_Tnp_1_2 DDE_Tnp_1"
/product="transposase, IS5 family, OrfB"
/translation="MRTKYTKVKKMWADMGYQGRNLKNHIKEEYDIDIEIVKRPPCRF
WVHKDTPPELLPTREQGFKVQPRRWVVERTFAWVNRNRRLSKEYDLLTTSTENFIYLA
MSRVMLKREYA"
/besthit="qcoverage 100 , hcoverage 100 , similarity 100
, identity 100 , evalue 1.53e-79 , alnlength 113 ,
Bacteria , Proteobacteria , AAS13810.1 transposase, IS5
family, OrfB [Wolbachia endosymbiont of Drosophila
melanogaster]"

```

# ORIGIN

```

1 atggtttggc ataatagagc cagtggcatc ttttactggt agaggcagag tgttaacagc
61 tctgcataat atgctacaaa gaagtgcaaa aaaacaagcg gtgatatcgc aggttgcctc
121 tattagcggc cttggaggag taggtaaaag tgagttggct aggaaatata cttacaaata
181 tggaaaggat tattatgtta atgctatctg gatagatgct gaaagcactg aaactatgaa
241 aaattctttc ctggatttag ctaataatag attaggcatt cctaccaaag ataggcacga
301 aagggacaag acgatagaaa acattgttag agaagtatat gctttttttg caagaagggg
361 aaggagaagc ctgttcattt ttgataatgc tgagggatat gaagacatta aaaggttttt
421 accttcatct ttacacccta gacataaaaa accttacatt ttaattactt ctcgtaataa
481 agattggaga atagcagaag acgaggaaaa aataaaaaaca atacagctag gtgtattcaa
541 aaaaacggag gctataaggt ttgtcaagag ggcttttaaat ataaaagata atttacaaga
601 tgaagaaata aaaaaactaa tagaggagtt acaatatttc ccactagctt tggggcaagc
661 aattgcatat ataaatgaaa gcaacattgt attaagtgcg agaggtgaag aaagagttgg
721 ggttagtgc tacctaaaaa ggtatgaaaa agaagcagag aaactgctcg actttgagtc
781 taaatataaa agtgaccgtt atactaaaaa aacattcata gcttgaaaaa ttacgattga
841 tgctatagca aaaagagaat gtgggccaga agcattgaag attctagaag taatggctta
901 tcttgctcct gacaagattc atatagaaga agtcttttca aagttaatag cagaggataa
961 ggaaaagtta tggaaaggctg ttgagctact cgatagatat tcaataattg acttaaaaaa
1021 aggagtggca aacattcaca gactagtgcg gaaagtaact gagttgaatt tacaaaaggc
1081 agtccgggaa gaagaagttc ttagaaaaagc tctggaattg ataaatagtg gtgatatagc
1141 aatcagtcac atttgtgtcta tttgggaata tgcaagtaaa tatggtaagt tgattgatga
1201 tttttacttt aactcatctt gtatacatag gaaaccattt tttataaaga aaagtactcc
1261 tttgcacttg cttgctgcaa gtggtgattt taaagcaatt aaggctatac tcacacatat
1321 atcaacacat ttcccaggta aattgataat ggctgttaat gttgaaaata attctggtca
1381 cgctccatta cactttgctg tttataatgg aagattagat gtagtaaagt accttgttag
1441 taaaggtgct gacattagtg ctaagagcaa agacggcagt actctgttgc actatgctgc
1501 tcagggtgga agcttgaatg tagtagaata cttgatagat gaaaagggtg cagacattaa
1561 cataaaagat aatgacggta caactcctct acactcgggt gcttatctag gctacttagc
1621 tgtagtgaag aagtttatag agaaaggagc tgatattaat tctagggata tttattataa
1681 aacacctctg cattttagctg ctagttaatg tgatttagat gtagtagaac atcttgtaaa
1741 caaaggcgct aatgtcaatg ctatggataa agatggcttg actccattac actgtgctgt
1801 ttttcgtgaa aatttggaag tagtagaata ccttgccgaa aaaggtgtta ataccaagaa
1861 caaagatgac gatacgccac tacactttgc tgccgtaatg ggaaaagttg ctgtggcaaa
1921 aatactgcta aaacacaacg ccgatgttaa cgctaaaaaat aatgaaggaa aaacagcatt
1981 gtagagggtg tccggaaaata agtaaaaggc tataatatct gaaattttag tacggggtaa
2041 agatgagaaa aaagtatcca acagatctaa gcgaaaggga atgggcaaga atagaaaaac
2101 acttcagagt atcatacaag aaaggaggaa ggccgcaaaa gtatagcaaa agagaaatat
2161 tagaagcaat tttctatgta ttgcgtacag ggtgtcaatg gcggtattta ccaaatgatt
2221 ttccgctatg gaagactgtg tatgagcagt tcaggcaatg gaagaagcag ggaatttttg
2281 agaaaatgaa ttatgaaatt acaaaatata gtagaagaaa aataggaagg aatgagcagc
2341 cgagtgcctg tatagtagat agtcaatctg taaagactac agaaaagggg ggatcaaagg
2401 ctatgatgga agtaaaaaag taaagggtag aaaaaggcat ataattacag aactcaggg

```



```

/codon_start=1
/transl_table=11
/product="hypothetical protein"

/translation="MSNKGCCYDNSVAESFFSSSLKRELPIDTSRHSKQHIKTAIFEYIEIFYNKQRHY"
gene      complement(215..376)
          /locus_tag="wEsol_00162"
CDS       complement(215..376)
          /locus_tag="wEsol_00162"
          /codon_start=1
          /transl_table=11
          /fullproduct="qcoverage 100 , hcoverage 100 , similarity
98.1 , identity 98.1 , evalue 4.57e-27 , alnlength 53 ,
Bacteria , Proteobacteria , WP_153801315.1 MULTISPECIES:
hypothetical protein [unclassified Wolbachia]"
          /cog="Tra5 COG2801 232 Transposase and inactivated
derivatives"
          /pfam="rve"
          /product="hypothetical protein"
          /translation="MSSSINKQLVMDSLMAVNKRKPAKNLLHSDQGSQYTAQGYQY
LLAVKNIDE"
          /besthit="qcoverage 100 , hcoverage 100 , similarity 98.1
, identity 98.1 , evalue 4.57e-27 , alnlength 53 ,
Bacteria , Proteobacteria , WP_153801315.1 MULTISPECIES:
hypothetical protein [unclassified Wolbachia]"
gene      complement(816..1100)
          /locus_tag="wEsol_00163"
CDS       complement(816..1100)
          /locus_tag="wEsol_00163"
          /codon_start=1
          /transl_table=11
          /fullproduct="qcoverage 100 , hcoverage 100 , similarity
100 , identity 100 , evalue 9.86e-56 , alnlength 94 ,
Bacteria , Proteobacteria , WP_039964423.1 transposase
[Wolbachia endosymbiont of Drosophila simulans]"
          /cog="COG2963 COG2963 116 Transposase and inactivated
derivatives"
          /pfam="HTH_Tnp_1 HTH_23 HTH_28 Pfam-B_9422"
          /product="transposase"
          /translation="MAREYTAEFKLEAVKLTNEQRKVGQPVAKVARDLGIRDSVLGKW
MKKYNEKKSAANAFPDVAPYDKERFDLQKELAKVTRERDILKKALASQKE"
          /besthit="qcoverage 100 , hcoverage 100 , similarity 100
, identity 100 , evalue 9.86e-56 , alnlength 94 ,
Bacteria , Proteobacteria , WP_039964423.1 transposase
[Wolbachia endosymbiont of Drosophila simulans]"
gene      complement(1119..1289)
          /locus_tag="wEsol_00164"
CDS       complement(1119..1289)
          /locus_tag="wEsol_00164"
          /codon_start=1
          /transl_table=11
          /fullproduct="qcoverage 100 , hcoverage 100 , similarity
100 , identity 100 , evalue 2.53e-32 , alnlength 56 ,
Bacteria , Proteobacteria , WP_197907316.1 hypothetical
protein [Wolbachia endosymbiont of Kradibia gibbosae]"
          /translation="MSQKVVNRTTGLVDYKELEANILSSIREFRPLTGRDGAFTLTQK
KWREKKEFFWVK"
          /product="hypothetical protein"
          /besthit="qcoverage 100 , hcoverage 100 , similarity 100
, identity 100 , evalue 2.53e-32 , alnlength 56 ,

```

gene Bacteria , Proteobacteria , WP\_197907316.1 hypothetical protein [Wolbachia endosymbiont of Kradibia gibbosae]"  
 complement(1369..1701)  
 /locus\_tag="wEsol\_00165"

CDS complement(1369..1701)  
 /locus\_tag="wEsol\_00165"  
 /codon\_start=1  
 /transl\_table=11  
 /fullproduct="qcoverage 100 , hcoverage 100 , similarity 100 , identity 100 , evalue 8.36e-69 , alnlength 110 , Bacteria , Proteobacteria , POG52374.1 hypothetical protein BJU59\_00535 [Wolbachia sp. wRi\_2]"  
 /translation="MYKSHIRLDKLGKPCRVLCELYAKLCAILIFHGIVGCTEVKKN  
 TELSLTKAFIELKRRVRELFLVLTKINSLKAFLKKLITWSRFSLKDKRRRARVSTLT  
 SLNLLTIS"  
 /product="hypothetical protein"  
 /besthit="qcoverage 100 , hcoverage 100 , similarity 100 , identity 100 , evalue 8.36e-69 , alnlength 110 , Bacteria , Proteobacteria , POG52374.1 hypothetical protein BJU59\_00535 [Wolbachia sp. wRi\_2]"

gene complement(1836..>1932)  
 /locus\_tag="wEsol\_00166"

CDS complement(1836..>1932)  
 /locus\_tag="wEsol\_00166"  
 /codon\_start=1  
 /transl\_table=11  
 /fullproduct="qcoverage 100 , hcoverage 81.5789473684211 , similarity 83.9 , identity 80.6 , evalue 2.59e-07 , alnlength 31 , Bacteria , Proteobacteria , KLT23187.1 transposase, IS4 family [Wolbachia endosymbiont of Armadillidium vulgare str. wVulC]"  
 /translation="LENEVLLGKEAKIRVRIICQKLTEYGQKKES"  
 /product="transposase, IS4 family"  
 /besthit="qcoverage 100 , hcoverage 81.5789473684211 , similarity 83.9 , identity 80.6 , evalue 2.59e-07 , alnlength 31 , Bacteria , Proteobacteria , KLT23187.1 transposase, IS4 family [Wolbachia endosymbiont of Armadillidium vulgare str. wVulC]"

# ORIGIN

```

1  gtgtggaatg ttttttacaa aaagaatgat gcatcaaatt gttctggaat gcaatagtta
61  atagtgcagt tgtttggtat aaaaaatttc tatatatcca aatatagcag ttttgatatg
121 ctgttttagag tgccgagagg tgtctattgg taactccctt ttagagaaac tgaagaagct
181 ttctgcaaca gaattgtcgt aacaacagcc tttattactc atctatatcc tttacagcta
241 agagatatgg atacccttgc gcagtatatt gtgaaccttg atcactatgt aatagtagat
301 ttttggcagg tttacgcttg ttaacggcca ttaataaaga gtccataacc aattggttat
361 ttattgaact gctcattaac taccatgcgt gaatatagat cgattattgt tgccaaatat
421 agccatcctt ctttggtttt tatataagta atcccatact ttatttggtt gatcgacaat
481 aaagtttttg tctaataatat tgggagctac tgtccggttg ttgtttctta attttaaatt
541 ttctttctca tatagcctga ataccatttt tctgcataat actttgcaat gtttttaagt
601 tgcaactttt acccaaagcc ttaatttcag catgaatttt aggagctcca tatctacatt
661 tagaagcttg atatattttt tgaatatctg ctaataaactc tttatttgct gattctctac
721 tgcttatttt tcttggtggtc cacttatagt agccactagc agaaaatcct acataattcc
781 tgtactttat agcagttact atataaaaaa atatatttact ctttttgact ggccagggct
841 ttttttaaaa tgtctctttc tcttgttact tttgctaact ctttctgtaa atcaaatctc
901 tctttgtcat aagggtgctac atctggaaat gcatttgccg ctgacttttt ttcgttatat
961 ttcttcatcc attttcctaa tacactatcc cttattccta gatctcttgc tacttttgca
1021 actgggttgac ctacctttct ttgttcattt gtcagcttaa cagcttccaa tttgaattct
1081 gccgtatatt ctcttgccat ttctaatact ccaaaatttt attttaccca aaaaaactcc
1141 tttctttctc tccacttttt ctgggtaagg tcaaatgctc catcccttcc tggttaatggt
1201 ctgccttccc ttattgatga cagtatatat gcttccagtt ctttgtaatc taccaaaccg

```

```

1261 gtagttctgt ttactacttt ctgactcatt gtcaaacctc catttttttta tatcaattta
1321 ttactttttt ttcggtttga cacacttttt tgaaccatac gcgtcaagtt aagagattgt
1381 gagcaaattt agagagggtta aagtggatac tctagccctt ctacgtttgt cttttaatga
1441 aaatcgcgac caagttatag tgagtttttt aagaaatgct tttaaactat taatttttgg
1501 taatactaaa aataactctc taacccgcct ttttagctca ataaatgcct ttgttaagct
1561 aagttctgta ttctttttca cttctgtgca accaactatg ccgtgaaata taagaattgc
1621 gcacaattta gcatatagtt cacataatac tctgcatggc tttcctttta gcttatcaag
1681 cctgatatgg cttttataca atttaaataa tttgccacct tactctgtaa atcgttaata
1741 cttgctcagc actaatttta ttttctggaa cattagttat accagttcaa caatttttga
1801 tttccttttag aggatcctgc gatcttgcta atctattagc tttccttctt ctggccatat
1861 tcagttagtt tctgacatat aattcttact ctaatttttg cttcttttcc taacaatacc
1921 tcgttttcta aa

```

//

```

LOCUS      JAQZAU010000020          972 bp    dna        linear    ENV 17-MAR-2023
DEFINITION MAG: Wolbachia pipientis isolate wEsol contig_18651, whole genome
            shotgun sequence.
ACCESSION  JAQZAU010000020  JAQZAU010000000
VERSION    JAQZAU010000020.1
DBLINK     BioProject: PRJNA929258
            BioSample: SAMN33142973
KEYWORDS   WGS; ENV; Metagenome Assembled Genome; MAG.
SOURCE     Wolbachia pipientis (insect metagenome)
ORGANISM   Wolbachia pipientis
            Bacteria; Pseudomonadota; Alphaproteobacteria; Rickettsiales;
            Anaplasmataceae; Wolbachieae; Wolbachia.
REFERENCE  1  (bases 1 to 972)
AUTHORS    Fiutek,N., Couger,B.M., Roy,S., de la Torre,J.R. and Connor,E.F.
TITLE      Genomic assessment of the contribution of the Wolbachia
            endosymbiont of Eurosta solidaginis to gall-induction
JOURNAL    International Journal Molecular Sciences
REFERENCE  2  (bases 1 to 972)
AUTHORS    Fiutek,N., Couger,B.M., Roy,S., de la Torre,J.R. and Connor,E.F.
TITLE      Direct Submission
JOURNAL    Submitted (10-FEB-2023) Biology, San Francisco State University,
            1600 Holloway Ave, San Francisco, CA 94132, USA
COMMENT    ##Genome-Assembly-Data-START##
            Assembly Date      :: JUN-2019
            Assembly Method    :: FLYE v. 06-2019
            Genome Representation :: Full
            Expected Final Version :: Yes
            Genome Coverage     :: 100.0x
            Sequencing Technology :: Illumina HiSeq; PacBio Sequel
            ##Genome-Assembly-Data-END##
FEATURES   Location/Qualifiers
            source              1..972
                                /organism="Wolbachia pipientis"
                                /mol_type="genomic DNA"
                                /submitter_seqid="contig_18651"
                                /isolate="wEsol"
                                /isolation_source="galls on Solidago altissima"
                                /host="Eurosta solidaginis MN-2018-EFC"
                                /db_xref="taxon:955"
                                /environmental_sample
                                /country="USA: Cowling Arboretum, Carleton College,
                                Northfield, MN"
                                /lat_lon="44.48 N 93.13 W"
                                /altitude="280 m"
                                /collection_date="2018-11"
                                /metagenome_source="insect metagenome"
                                /note="metagenomic"

```

```

gene          <1..102
              /locus_tag="wEsol_00167"
CDS           <1..102
              /locus_tag="wEsol_00167"
              /codon_start=1
              /transl_table=11
              /product="hypothetical protein"
              /translation="EYNKFRKRGKFFIISPEDIEKQWYENGPKIPGEQ"

ORIGIN
1 gaatataaca aattcagaaa aagaggaaaa tttttcatta tatcacccga agacatagaa
61 aagtggtagc agaatgggtcc aaaaatacca ggggaacaat aattttatc atcaagtttt
121 aatttttgtg tgcacatact aactgtgtat agactcggct gaggcaaaac agagttgagt
181 ttaatagcag gataccttga gcacatgcgg aaaaatttta gcagttaatc agctattaca
241 atcatcaaga agtttaagaa actccaatat agatcaatga ttgcagaaaa taatatggaa
301 gacatcaaat tagctataga aagtacagcg aattagtatt atacaacaca ctcttggtca
361 tagcaaagaa aatagcgaga taaagatcgc agcttgaaga gaacaaaaat tgcattgaatg
421 ttgaatacaa acagcaaaaa agcccagcgg taaaatccag taaacggcta tgatcactat
481 ggagcttggtg atttgctaaa agaagtcgat tttcagtata ggtatcataa agattatcta
541 tatgcagata ggacaataat ggacagagag aaaagctcta taagctgatg ataactacta
601 tggattataaa aacgaaaaat tacctccgaa aacaacgcag cagagcagac acaagttagc
661 acataaatgg ctatgacaaa ttctgcaagt caagctcata aagtcatatg atgagatagg
721 tataaagaag tggaaaaaca aaagagatga gttatggaaa aagatttaaat agaaggttta
781 attcttgcac gatttcaaaa aagaatttga tttagttttt taggaacaaa tctgaaatga
841 atcgtgagag ggaatgctac tcaaattgtga tttgcttaac caaattttac ggaaataggc
901 atggactaat ttggatagac ttcataatgt attgtgcgtt acctactatc gaagagagat
961 gacacaaagc ca

//
LOCUS       JAQZAU010000021                2594 bp    dna        linear    ENV 17-MAR-2023
DEFINITION  MAG: Wolbachia pipientis isolate wEsol contig_19356, whole genome
            shotgun sequence.
ACCESSION   JAQZAU010000021  JAQZAU010000000
VERSION     JAQZAU010000021.1
DBLINK      BioProject: PRJNA929258
            BioSample: SAMN33142973
KEYWORDS    WGS; ENV; Metagenome Assembled Genome; MAG.
SOURCE      Wolbachia pipientis (insect metagenome)
  ORGANISM  Wolbachia pipientis
            Bacteria; Pseudomonadota; Alphaproteobacteria; Rickettsiales;
            Anaplasmataceae; Wolbachieae; Wolbachia.
REFERENCE   1  (bases 1 to 2594)
  AUTHORS   Fiutek,N., Couger,B.M., Roy,S., de la Torre,J.R. and Connor,E.F.
  TITLE     Genomic assessment of the contribution of the Wolbachia
            endosymbiont of Eurosta solidaginis to gall-induction
  JOURNAL   International Journal Molecular Sciences
REFERENCE   2  (bases 1 to 2594)
  AUTHORS   Fiutek,N., Couger,B.M., Roy,S., de la Torre,J.R. and Connor,E.F.
  TITLE     Direct Submission
  JOURNAL   Submitted (10-FEB-2023) Biology, San Francisco State University,
            1600 Holloway Ave, San Francisco, CA 94132, USA
COMMENT     ##Genome-Assembly-Data-START##
            Assembly Date           :: JUN-2019
            Assembly Method          :: FLYE v. 06-2019
            Genome Representation    :: Full
            Expected Final Version   :: Yes
            Genome Coverage          :: 100.0x
            Sequencing Technology    :: Illumina HiSeq; PacBio Sequel
            ##Genome-Assembly-Data-END##
FEATURES             Location/Qualifiers
     source           1..2594
                     /organism="Wolbachia pipientis"

```

```

/mol_type="genomic DNA"
/submitter_seqid="contig_19356"
/isolate="wEsol"
/isolation_source="galls on Solidago altissima"
/host="Eurosta solidaginis MN-2018-EFC"
/db_xref="taxon:955"
/environmental_sample
/country="USA: Cowling Arboretum, Carleton College,
Northfield, MN"
/lat_lon="44.48 N 93.13 W"
/altitude="280 m"
/collection_date="2018-11"
/metagenome_source="insect metagenome"
/note="metagenomic"
gene
<1..261
/locus_tag="wEsol_00168"
CDS
<1..261
/locus_tag="wEsol_00168"
/codon_start=1
/transl_table=11
/product="hypothetical protein"
/translation="THTGSTGVYKQRHRLPEVFHSMGRDRLRMVQELLQARPPKLVK
GMSTGSKEDKWLDSPTGPFACGIGKFTPGAEDFSYRQNLMLG"
/besthit="qcoverage 100 , hcoverage 11.8294360385144 ,
similarity 100 , identity 100 , evaluate 5.72e-51 ,
alnlength 86 , Bacteria , Proteobacteria , WP_174516735.1
AAA family ATPase [Wolbachia endosymbiont of
Cardiocondyla obscurior]"
gene
2042..>2594
/locus_tag="wEsol_00169"
CDS
2042..>2594
/locus_tag="wEsol_00169"
/codon_start=1
/transl_table=11
/product="hypothetical protein"
/translation="MEIQRLLSKTPEQLREYCESLGYEDKQONLYKQVVDEAKGKRLRE
LKQLSKLATAIEKTTDDKLLKPFRRGDDNPLNGVVILSFFGKLSRRLLLIMHSSVYDKS
LKQLDELDELPLQMYGELRPKLTSSMRNYAERELRFSNFLRDNIDTFKLLKAEHGS
EERKKAAIALFIRQPELNFQGDVF"
/besthit="qcoverage 100 , hcoverage 69.4339622641509 ,
similarity 100 , identity 100 , evaluate 3.24e-120 ,
alnlength 184 , Bacteria , Proteobacteria ,
WP_174516736.1 MULTISPECIES: hypothetical protein
[unclassified Wolbachia]"

```

# ORIGIN

```

1 actcacacag gaagcacagg agtatataag caacggcata gactacctga agttttttcac
61 agcatgggaa gggatagact agagcgtatg gtacaggaac ttttacaagc aagaccacca
121 aaattagtaa agggaatgtc tacagggttcg aaagaagata aatggcttga cagtccaact
181 ggaccatttg cttgtggtat aggaaaattc actcctggag ctgaagattt tagctatagg
241 caaaatttaa tgtaggata agtctttttt tatgggtaaa aatatttttag agtttaccca
301 gtttcttcta ttgttttttc aacttgtagc tactatcaat tcatatctac ttaactaaaa
361 cgctaatttt agaactcaat ataattttca attaaaggta gatagaatat ataagaaata
421 acaccaccaa caattgaatt acattcccaa ttcccagggt cccaaatcag taattggaaa
481 ttaggaatct gaatcctgcg tgagagctag cttttccacc tgcgttccca aaagcgttcc
541 tagaaatcat gtgtctaaag tcagccagta tagcggattc tagcttccca aaacccttat
601 atattatata tatataatag taataaataa taatagataa aataatataa gctaataata
661 aaacatacaa atctaaatgc attcaacttt taactaagtc tgacccaaaa aatagtgtta
721 aaatgttcac aaaacagaac gtagaaaagc aaatagcctt caatgtcgtt ttttaagcga
781 tctagtatct taaggtaaaa taataccaac tacacctaag taacgcttgt aacacccttt
841 aaaagccgat taaaaggat atctaagtca tcaccacac caaattttat ctttgcagaa

```

```

901 gaaactctat tttagtttat cacgtttttt attcgttgta aaatattttt tcaaaaaaag
961 tgaacagttt tcataatttc ggtacaacaa gagctgggta ttttggtata ttggagggtct
1021 tatggaaata taacgacttt tatctaaaac tcctaaggga atattgtgag tcttttgatg
1081 aaaaaatctc tataaacagg ttatagatga aggtcaagga aaaaagtttg aagttactgc
1141 catagaagaa gaaacagaag ctcgtaaaat ttgattgctg cttaaaatgg agacaaagag
1201 caaaatttat tgtctccaac agaaaaactt cttttgtagt agtcaaaaaa agcagagata
1261 tagggctttc tgaaggaggg ggacaatttt tcacccccct tgaaattaaa accaaaaaga
1321 tacagtttta catagcacat tttcattgta aaaaagagct atcagcccat ttcaattgtc
1381 tccattgcaa caccattctt aaaaacgcct tagaaggcta ttatagcggt actgatgatc
1441 tagataggga gatactgttt tatcaaaaac tcatgtaacc tcttctagat tcaaataatc
1501 agttgtttcc aaaatggaaa gatctcaaat agcgaagaag ctggttgtaaa agacatagct
1561 ggtttttaggc tctttttaat ttcttagctg ccttaaaatt attttaactt ttttttagaa
1621 aatcccggaa aaagtgggtg gaaatccgga gtataggggc attgagtgtg gataacacaa
1681 aagtcggcaa acaaacagag tagagaagag aagattgaag aaagcaaaaag aaatttaggc
1741 ttttggttaag ttacgtaatt gagaatttgt attttttttag atgaggtaaa aactttgttt
1801 taaggctaga tgcaacttta gggtaaaaaa atactacat taccaaagaa cgcataata
1861 gcccttaga acttgaataa atggcattct tagcaattct attactgtat agtaaaactca
1921 ctagtgagtt tagcacgttt tttacgcttt gcaaagaaaa attaaaaaaa agtgaacagt
1981 ttttgtaaaa tcggtgaata tatataacaa agctgggta agttgggtata ttggagggtct
2041 tatggaaata caacgacttt tatctaaaac tcctgaacaa ttgagggaat attgtgagtc
2101 tttaggttat gaagataagc aaaatctcta taaacagggt gtagatgaag ctaaaggaaa
2161 acgtttaaga gagctgaaac aattaagtaa attagctact gcaatagaaa aaacaacgga
2221 taagaagtta ttgaaacctt ttcgcggtga tgataatccg cttaatggag tagtaatttt
2281 aagttttttt ggaaaattaa gtaggcgcct tcttttaata atgcactctt cagtttacga
2341 taaaagttta aaacagttgg atgagttaga tgaattatta ccacagatgt atggagaact
2401 aagacctaaa ttgacaagta gcatgagaaa ttacgcagaa agagagctaa gattcagcaa
2461 cttcttgccg gataacattg atactttcaa gcttctagaa aaagctgaac atgggttctat
2521 agaagaaaga aaaaagcag caatcgcggt atttatacgc cagccagaat taaatttcca
2581 aggggatgta tttt

```

//

```

LOCUS      JAQZAU010000022      1088 bp      dna      linear      ENV 17-MAR-2023
DEFINITION MAG: Wolbachia pipientis isolate wEsol contig_19940, whole genome
            shotgun sequence.
ACCESSION  JAQZAU010000022 JAQZAU010000000
VERSION    JAQZAU010000022.1
DBLINK     BioProject: PRJNA929258
            BioSample: SAMN33142973
KEYWORDS   WGS; ENV; Metagenome Assembled Genome; MAG.
SOURCE     Wolbachia pipientis (insect metagenome)
ORGANISM   Wolbachia pipientis
            Bacteria; Pseudomonadota; Alphaproteobacteria; Rickettsiales;
            Anaplasmataceae; Wolbachieae; Wolbachia.
REFERENCE  1 (bases 1 to 1088)
AUTHORS    Fiutek,N., Couger,B.M., Roy,S., de la Torre,J.R. and Connor,E.F.
TITLE      Genomic assessment of the contribution of the Wolbachia
            endosymbiont of Eurosta solidaginis to gall-induction
JOURNAL    International Journal Molecular Sciences
REFERENCE  2 (bases 1 to 1088)
AUTHORS    Fiutek,N., Couger,B.M., Roy,S., de la Torre,J.R. and Connor,E.F.
TITLE      Direct Submission
JOURNAL    Submitted (10-FEB-2023) Biology, San Francisco State University,
            1600 Holloway Ave, San Francisco, CA 94132, USA
COMMENT    ##Genome-Assembly-Data-START##
            Assembly Date      :: JUN-2019
            Assembly Method    :: FLYE v. 06-2019
            Genome Representation :: Full
            Expected Final Version :: Yes
            Genome Coverage     :: 100.0x
            Sequencing Technology :: Illumina HiSeq; PacBio Sequel
            ##Genome-Assembly-Data-END##

```

| FEATURES | Location/Qualifiers                                                                                                                                                                                                                                                                                                                                                                                                                                                                                                                                                                                                                                                        |
|----------|----------------------------------------------------------------------------------------------------------------------------------------------------------------------------------------------------------------------------------------------------------------------------------------------------------------------------------------------------------------------------------------------------------------------------------------------------------------------------------------------------------------------------------------------------------------------------------------------------------------------------------------------------------------------------|
| source   | 1..1088<br>/organism="Wolbachia pipientis"<br>/mol_type="genomic DNA"<br>/submitter_seqid="contig_19940"<br>/isolate="wEsol"<br>/isolation_source="galls on Solidago altissima"<br>/host="Eurosta solidaginis MN-2018-EFC"<br>/db_xref="taxon:955"<br>/environmental_sample<br>/country="USA: Cowling Arboretum, Carleton College, Northfield, MN"<br>/lat_lon="44.48 N 93.13 W"<br>/altitude="280 m"<br>/collection_date="2018-11"<br>/metagenome_source="insect metagenome"<br>/note="metagenomic"                                                                                                                                                                       |
| gene     | complement(<1..89)<br>/locus_tag="wEsol_00170"                                                                                                                                                                                                                                                                                                                                                                                                                                                                                                                                                                                                                             |
| CDS      | complement(<1..89)<br>/locus_tag="wEsol_00170"<br>/codon_start=1<br>/transl_table=11<br>/product="hypothetical protein"<br>/translation="MPFKPRYFTYFSMAFFLLLSIRYLCSGNW"                                                                                                                                                                                                                                                                                                                                                                                                                                                                                                    |
| gene     | 83..265<br>/locus_tag="wEsol_00171"                                                                                                                                                                                                                                                                                                                                                                                                                                                                                                                                                                                                                                        |
| CDS      | 83..265<br>/locus_tag="wEsol_00171"<br>/codon_start=1<br>/transl_table=11<br>/fullproduct="qcoverage 100 , hcoverage 100 , similarity 100 , identity 100 , evalue 1.53e-28 , alnlength 60 , Bacteria , Proteobacteria , EAL57766.1 hypothetical protein WwAna0375 [Wolbachia endosymbiont of Drosophila ananassae]"<br>/translation="MALRSKLLDEKVVESAKEMLKKVRNNAYVAKKLNAVIAAKKHSTAVAKICCISRKALTA"<br>/product="hypothetical protein"<br>/besthit="qcoverage 100 , hcoverage 100 , similarity 100 , identity 100 , evalue 1.53e-28 , alnlength 60 , Bacteria , Proteobacteria , EAL57766.1 hypothetical protein WwAna0375 [Wolbachia endosymbiont of Drosophila ananassae]" |
| gene     | 327..551<br>/locus_tag="wEsol_00172"                                                                                                                                                                                                                                                                                                                                                                                                                                                                                                                                                                                                                                       |
| CDS      | 327..551<br>/locus_tag="wEsol_00172"<br>/codon_start=1<br>/transl_table=11<br>/fullproduct="qcoverage 100 , hcoverage 100 , similarity 100 , identity 100 , evalue 6.33e-43 , alnlength 74 , Bacteria , Proteobacteria , EAL59033.1 conserved hypothetical protein [Wolbachia endosymbiont of Drosophila ananassae]"<br>/cog="COG3415 COG3415 138 Transposase and inactivated derivatives"<br>/pfam="HTH_32 Pfam-B_19535 HTH_Tnp_Tc3_2 HTH_33 HTH_24"<br>/product="conserved hypothetical protein"<br>/translation="MNSQSQREQVEVWIEENPNITIKEMKIRIQEKFGNLISKSTVHRN"                                                                                                         |

MQRMKFSYITPRPVHNGQDKSKQEEFKKKS"  
 /besthit="qcoverage 100 , hcoverage 100 , similarity 100  
 , identity 100 , evalue 6.33e-43 , alnlength 74 ,  
 Bacteria , Proteobacteria , EAL59033.1 conserved  
 hypothetical protein [Wolbachia endosymbiont of  
 Drosophila ananassae]"  
 gene 565..1071  
 /locus\_tag="wEsol\_00173"  
 CDS 565..1071  
 /locus\_tag="wEsol\_00173"  
 /codon\_start=1  
 /transl\_table=11  
 /pfam="DDE\_3 DDE\_1"  
 /fullproduct="qcoverage 100 , hcoverage 100 , similarity  
 100 , identity 100 , evalue 3.77e-120 , alnlength 168 ,  
 Bacteria , Proteobacteria , EAL59034.1 transposase family  
 protein [Wolbachia endosymbiont of Drosophila ananassae]"  
 /translation="MYPEKELFFFDESFRGTHSKIGHGWFKKGIRTQVKVKLGRQNFY  
 LYSAVNPRNGESSSSNVNTDCMNIFLEQMSQYLGTREAFILMDCASWHKSKNLKVPKN  
 IDIIYLPYPSPDLNPVERFWLYIKQNILRNKIYDTIALLESALCKFITSLSHSTIKKL  
 CNAAYLIH"  
 /product="transposase family protein"  
 /besthit="qcoverage 100 , hcoverage 100 , similarity 100  
 , identity 100 , evalue 3.77e-120 , alnlength 168 ,  
 Bacteria , Proteobacteria , EAL59034.1 transposase family  
 protein [Wolbachia endosymbiont of Drosophila ananassae]"

# ORIGIN

```

1  taccaattcc cgctacacaa gtaacggata gacaataata gaaaaaaagc catactgaag
61  taagtaaagt agcgagggtt aaatggcatt aagatcaaaa ttattggatg aaaaagtggg
121 ggaatcagca aaagaaatgc tgaagaaagt aagaaataac gcatatgttg caaaaaaact
181 aaatgctgta attgcagcaa aaaagcacag tataacagcc gtagcaaaga tatgctgcat
241 ttcaagaaag gcacttactg catgacctaa aatttggcag agaagaaaaa ttatttgctc
301 cgcctcaacg ccgtagaaaa actatattga atcaaagtca acgtgaacaa gttgaggtgt
361 ggatagagga aaacccaat attactataa aagaaatgaa aataagaatt caagaaaagt
421 ttggtttgaa tatcagcaaa tctacagtac accgtaatat gcaaagaatg aaatttcat
481 atatcacacc aagaccagtg cataacggac aagataaaaag taaacaagag gaatttaaaa
541 aaaaatctta atgaaactat tgtcatgtat cctgaaaaag agctatcttt cttcgatgaa
601 tcgcggtttg gcacacattc aaagattgga cacgggtggt ttaaaaaagg cattaggaca
661 caggttaagg taaaactagg taggcaaaat ttttatctct atagtgcagt taatcccaga
721 aatggagaaa gttctagctc aaacgtcaat actgattgta tgaatatatt ccttgagcag
781 atgtcacaat atttaggaac aagggaggca tttcttatca tggattgtgc tagttggcat
841 aagtcaaaaa atttaaaagt acctaaaaat atcgacatta tatacctacc accatactca
901 cctgacctca atcctgttga gaggttttgg ttatatataa aacagaacat tttgcgtaac
961 aaaatctacg acacaattgc tttgcttgag agcgctttgt gcaaatttat tacctctctt
1021 tctcactcca caattaaanaa actctgcaat gccgcttatt tgattcacta gtaatgagaa
1081 ttggtatt
  
```

//

LOCUS JAQZAU010000023 937 bp dna linear ENV 17-MAR-2023  
 DEFINITION MAG: Wolbachia pipientis isolate wEsol contig\_20599, whole genome  
 shotgun sequence.  
 ACCESSION JAQZAU010000023 JAQZAU010000000  
 VERSION JAQZAU010000023.1  
 DBLINK BioProject: PRJNA929258  
 BioSample: SAMN33142973  
 KEYWORDS WGS; ENV; Metagenome Assembled Genome; MAG.  
 SOURCE Wolbachia pipientis (insect metagenome)  
 ORGANISM Wolbachia pipientis  
 Bacteria; Pseudomonadota; Alphaproteobacteria; Rickettsiales;  
 Anaplasmataceae; Wolbachieae; Wolbachia.  
 REFERENCE 1 (bases 1 to 937)

AUTHORS Fiutek,N., Couger,B.M., Roy,S., de la Torre,J.R. and Connor,E.F.  
 TITLE Genomic assessment of the contribution of the Wolbachia  
 endosymbiont of Eurosta solidaginis to gall-induction  
 JOURNAL International Journal Molecular Sciences  
 REFERENCE 2 (bases 1 to 937)  
 AUTHORS Fiutek,N., Couger,B.M., Roy,S., de la Torre,J.R. and Connor,E.F.  
 TITLE Direct Submission  
 JOURNAL Submitted (10-FEB-2023) Biology, San Francisco State University,  
 1600 Holloway Ave, San Francisco, CA 94132, USA  
 COMMENT ##Genome-Assembly-Data-START##  
 Assembly Date :: JUN-2019  
 Assembly Method :: FLYE v. 06-2019  
 Genome Representation :: Full  
 Expected Final Version :: Yes  
 Genome Coverage :: 100.0x  
 Sequencing Technology :: Illumina HiSeq; PacBio Sequel  
 ##Genome-Assembly-Data-END##  
 FEATURES Location/Qualifiers  
 source 1..937  
 /organism="Wolbachia pipientis"  
 /mol\_type="genomic DNA"  
 /submitter\_seqid="contig\_20599"  
 /isolate="wEsol"  
 /isolation\_source="galls on Solidago altissima"  
 /host="Eurosta solidaginis MN-2018-EFC"  
 /db\_xref="taxon:955"  
 /environmental\_sample  
 /country="USA: Cowling Arboretum, Carleton College,  
 Northfield, MN"  
 /lat\_lon="44.48 N 93.13 W"  
 /altitude="280 m"  
 /collection\_date="2018-11"  
 /metagenome\_source="insect metagenome"  
 /note="metagenomic"  
 gene complement(<1..460)  
 /locus\_tag="wEsol\_00174"  
 CDS complement(<1..460)  
 /locus\_tag="wEsol\_00174"  
 /codon\_start=1  
 /transl\_table=11  
 /fullproduct="qcoverage 100 , hcoverage 99.3506493506494  
 , similarity 99.3 , identity 99.3 , evaluate 1.02e-101 ,  
 alnlength 153 , Bacteria , Proteobacteria ,  
 WP\_197907400.1 MULTISPECIES: phage baseplate assembly  
 protein V [unclassified Wolbachia]"  
 /cog="gpV COG4540 184 Phage P2 baseplate assembly protein  
 gpV"  
 /pfam="Phage\_base\_V"  
 /tigr="TIGR01644 phage\_P2\_V 192 phage baseplate assembly  
 protein V"  
 /product="phage baseplate assembly protein V"  
 /translation="MLEHNFAISELNRKLANIIRIGLVKEVDYEKARVRVKIGEFLLTD  
 WLPWVTARAGEDRSWFAPNIDEQVIVLSPYGELSLGVVLPaiYQEKYPPENKKEINS  
 AKFQDGTKLSYDKDKHHLEIDVIDKITLKGESSIEMTKKGIKLKAkrinL"  
 /besthit="qcoverage 100 , hcoverage 99.3506493506494 ,  
 similarity 99.3 , identity 99.3 , evaluate 1.02e-101 ,  
 alnlength 153 , Bacteria , Proteobacteria ,  
 WP\_197907400.1 MULTISPECIES: phage baseplate assembly  
 protein V [unclassified Wolbachia]"  
 gene complement(454..912)

```

CDS
    /locus_tag="wEsol_00175"
    complement(454..912)
    /locus_tag="wEsol_00175"
    /codon_start=1
    /transl_table=11
    /pfam="Pfam-B_4030"
    /fullproduct="qcoverage 100 , hcoverage 100 , similarity
    100 , identity 100 , evaluate 9.93e-106 , alnlength 152 ,
    Bacteria , Proteobacteria , WP_209452513.1 hypothetical
    protein [Wolbachia endosymbiont of Ceratosolen solmsi]"
    /translation="MILTELHKAICRMLKKEIPAIQTCEVYPTIRREIVAPAVFVELS
    SLEQGKDPGTEELALRARFEARIVVDGTVEDSSVVVRELAEEVARVVNKNNTWDVENVS
    AGEFISAGGDDFRPELDAYLVMMVEWVHEIHVWKSVMSETGTYNKCWRKC"
    /product="hypothetical protein"
    /besthit="qcoverage 100 , hcoverage 100 , similarity 100
    , identity 100 , evaluate 9.93e-106 , alnlength 152 ,
    Bacteria , Proteobacteria , WP_209452513.1 hypothetical
    protein [Wolbachia endosymbiont of Ceratosolen solmsi]"

```

#### ORIGIN

```

1 ttagatztat tctttttgct ttgagtttta ttcccttttt tgatcatttct atacttgatt
61 cccaacttt tagcggttatt ttatctatta catctatctc taaatgatgt ttatctttat
121 cgtacgataa ctttgtccca tcttgaaatt ttgcactatt tatttccttt ttattctccg
181 gagggggata tttctcctga tatattgctg gtaatactac ccctaataac aactctccat
241 atggcgataa tactattact tgctcatcaa tattcggcgc aaaccaactt ctatcttctc
301 ctgctcttgc cgttaccac ggaagccaat ccgttaaaaa ttctcctatt tttaccgca
361 ctcttgcttt ttcatagtct acttctttta ctagacctat acgaataata ttcgctaact
421 tcctattcag ctctgaaatt gcaaaattat gctctaact tttcgccaac acttattgta
481 tgtgccagtt tctgaccaca ctgacttcca tacatggatt tcatgcaccc attcaacat
541 ccacactaga tatgcatcca actctggcct aaaatcatct cctcctgctg atataaattc
601 acctgctgaa acattttcca cgtcccaagt attcttattc actactctcg caacttctgc
661 tgctaattct ctcacaacta ccgaggaatc ctcgactgtt ccatcaacta caattcttgc
721 ttcaaattct gctctcagcg ccaattcctc tgttcctgga tcttttcctt gctctaaact
781 tgacaattct acaaataaccg ctggtgctac tatttccctt cttatcgttg gatatacttc
841 acatgtctgt atcgctggta tttctttctt caacatcctg caaattgctt tgtgcaactc
901 agttaaaatc atactttttac aatatagttt aattcac

```

```

//
LOCUS      JAQZAU010000024                8269 bp    dna        linear    ENV 17-MAR-2023
DEFINITION MAG: Wolbachia pipientis isolate wEsol contig_20751, whole genome
            shotgun sequence.
ACCESSION  JAQZAU010000024 JAQZAU010000000
VERSION    JAQZAU010000024.1
DBLINK     BioProject: PRJNA929258
            BioSample: SAMN33142973
KEYWORDS   WGS; ENV; Metagenome Assembled Genome; MAG.
SOURCE     Wolbachia pipientis (insect metagenome)
ORGANISM   Wolbachia pipientis
            Bacteria; Pseudomonadota; Alphaproteobacteria; Rickettsiales;
            Anaplasmataceae; Wolbachieae; Wolbachia.
REFERENCE  1 (bases 1 to 8269)
AUTHORS    Fiutek,N., Couger,B.M., Roy,S., de la Torre,J.R. and Connor,E.F.
TITLE      Genomic assessment of the contribution of the Wolbachia
            endosymbiont of Eurosta solidaginis to gall-induction
JOURNAL    International Journal Molecular Sciences
REFERENCE  2 (bases 1 to 8269)
AUTHORS    Fiutek,N., Couger,B.M., Roy,S., de la Torre,J.R. and Connor,E.F.
TITLE      Direct Submission
JOURNAL    Submitted (10-FEB-2023) Biology, San Francisco State University,
            1600 Holloway Ave, San Francisco, CA 94132, USA
COMMENT    ##Genome-Assembly-Data-START##
            Assembly Date                :: JUN-2019

```

Assembly Method :: FLYE v. 06-2019  
 Genome Representation :: Full  
 Expected Final Version :: Yes  
 Genome Coverage :: 100.0x  
 Sequencing Technology :: Illumina HiSeq; PacBio Sequel  
 ##Genome-Assembly-Data-END##

|          |                                                                                                                                                                                                                                                                                                                                                                                                                                                                                                                                                                                                                                                                                                                                                                                                                                            |
|----------|--------------------------------------------------------------------------------------------------------------------------------------------------------------------------------------------------------------------------------------------------------------------------------------------------------------------------------------------------------------------------------------------------------------------------------------------------------------------------------------------------------------------------------------------------------------------------------------------------------------------------------------------------------------------------------------------------------------------------------------------------------------------------------------------------------------------------------------------|
| FEATURES | Location/Qualifiers                                                                                                                                                                                                                                                                                                                                                                                                                                                                                                                                                                                                                                                                                                                                                                                                                        |
| source   | 1..8269<br>/organism="Wolbachia pipientis"<br>/mol_type="genomic DNA"<br>/submitter_seqid="contig_20751"<br>/isolate="wEsol"<br>/isolation_source="galls on Solidago altissima"<br>/host="Eurosta solidaginis MN-2018-EFC"<br>/db_xref="taxon:955"<br>/environmental_sample<br>/country="USA: Cowling Arboretum, Carleton College, Northfield, MN"<br>/lat_lon="44.48 N 93.13 W"<br>/altitude="280 m"<br>/collection_date="2018-11"<br>/metagenome_source="insect metagenome"<br>/note="metagenomic"                                                                                                                                                                                                                                                                                                                                       |
| gene     | <1..526<br>/locus_tag="wEsol_00176"                                                                                                                                                                                                                                                                                                                                                                                                                                                                                                                                                                                                                                                                                                                                                                                                        |
| CDS      | <1..526<br>/locus_tag="wEsol_00176"<br>/codon_start=1<br>/transl_table=11<br>/fullproduct="qcoverage 100 , hcoverage 94.0540540540541 , similarity 100 , identity 100 , evaluate 1.83e-112 , alnlength 174 , Bacteria , Proteobacteria , EEH12441.1 DnaJ domain protein, partial [Wolbachia endosymbiont of Muscidifurax uniraptor]"<br>/translation="FLAPLLAGSILSLAVKSIYTRNGKEFNHQTNILLFFNFDQECEN FSKSDRTRLKWLKNSVILSNTICTSLMFFGVGLDLVANGFGITNSMMLSGLLLSLPFT LLIVTSPILNAASNYILKKTAINSIEEQFKGDDQFIEVDNEKPSSTMSNQSYFPIGQL ISSKLAILHSEVSS"<br>/product="DnaJ domain protein, partial"<br>/besthit="qcoverage 100 , hcoverage 94.0540540540541 , similarity 100 , identity 100 , evaluate 1.83e-112 , alnlength 174 , Bacteria , Proteobacteria , EEH12441.1 DnaJ domain protein, partial [Wolbachia endosymbiont of Muscidifurax uniraptor]" |
| gene     | complement(494..1774)<br>/locus_tag="wEsol_00177"                                                                                                                                                                                                                                                                                                                                                                                                                                                                                                                                                                                                                                                                                                                                                                                          |
| CDS      | complement(494..1774)<br>/locus_tag="wEsol_00177"<br>/codon_start=1<br>/transl_table=11<br>/fullproduct="qcoverage 100 , hcoverage 99.3006993006993 , similarity 99.8 , identity 99.5 , evaluate 7.18e-314 , alnlength 426 , Bacteria , Proteobacteria , WP_197907432.1 MULTISPECIES: bifunctional folylpolyglutamate synthase/dihydrofolate synthase [unclassified Wolbachia]"<br>/cog="FolC COG0285 427 Folylpolyglutamate synthase"<br>/pfam="Mur_ligase_M"<br>/tigr="TIGR01499 folC 400 bifunctional protein FolC"<br>/product="bifunctional"                                                                                                                                                                                                                                                                                          |

```

folylpolyglutamate synthase/dihydrofolate synthase"
/translation="MPHWPKPLGSRPNDFSLDRIKSFLSKLDNPEKKVPPVIHIAGTN
GKGSTLAFIRYIMQAAGYKVHAYTSPHLVNFNERIIVIAGSYIDDNELYSLEE CRAVI
AEQPITLFEAATIAAFLAFSRHKADITLIEVGMGGRLDTTNVIDSPILTIITSIALDH
TEYLGPTIEIIAGEKAGIMKPNVPCVIAPQEKSIMNTLEYHAINKKSPLYRGGFEWNC
KKKNNKMVFQSAIQSIEFPLPSLKGDHQIINAGNAIAACSILSGKYGFDIGEEDITSG
LQCTYWPAQLERIKEGNLISLLPKDWQLFLDGAHNNDGARVLFQWVKDNFAEGIYIIF
GVTRNRNVEEFLEHLKPYIKLLCAVCVKSEPKATNTNLIREKANNIGIKAIECESIGD
AISNHILKASIQNVKTILICGSLFLARDFAMENS"
/besthit="qcoverage 100 , hcoverage 99.3006993006993 ,
similarity 99.8 , identity 99.5 , evalue 7.18e-314 ,
alnlength 426 , Bacteria , Proteobacteria ,
WP_197907432.1 MULTISPECIES: bifunctional
folylpolyglutamate synthase/dihydrofolate synthase
[unclassified Wolbachia]"
gene complement(1780..2370)
/locus_tag="wEsol_00178"
CDS complement(1780..2370)
/locus_tag="wEsol_00178"
/codon_start=1
/transl_table=11
/fullproduct="qcoverage 100 , hcoverage 100 , similarity
100 , identity 100 , evalue 4.23e-133 , alnlength 196 ,
Bacteria , Proteobacteria , WP_015589354.1 MULTISPECIES:
ABC transporter substrate-binding protein [unclassified
Wolbachia]"
/cog="Ttg2D COG2854 202 ABC-type transport system
involved in resistance to organic solvents, auxiliary
component"
/pfam="Pfam-B_9033 Tol_Tol_Ttg2"
/tigr="TIGR03481 HpnM 200 hopanoid biosynthesis
associated membrane protein HpnM"
/product="ABC transporter substrate-binding protein"
/translation="MNITKVLIIIVFIVISSAYTNCTDHKIFVHTMKQQVDSISTKG
NRKNLEHVHEKLQEVIQNNVNLKEISRFBVMGKYWVLTTRKEREDFLREYEVYLTRLCV
KILSKYMSNSEMIIMSTKAVDDETCLIGTRFSYGDEEFTNIDFKVTKNHSSFLISDVV
MSGISIAINQRSQFSEKIDTHGIASVIGELKCNNNL"
/besthit="qcoverage 100 , hcoverage 100 , similarity 100
, identity 100 , evalue 4.23e-133 , alnlength 196 ,
Bacteria , Proteobacteria , WP_015589354.1 MULTISPECIES:
ABC transporter substrate-binding protein [unclassified
Wolbachia]"
gene 2572..3114
/locus_tag="wEsol_00179"
CDS 2572..3114
/locus_tag="wEsol_00179"
/codon_start=1
/transl_table=11
/fullproduct="qcoverage 100 , hcoverage 100 , similarity
100 , identity 100 , evalue 2.23e-127 , alnlength 180 ,
Bacteria , Proteobacteria , ACN95788.1 cyclase/dehydrase
[Wolbachia sp. wRi]"
/cog="COG2867 COG2867 146 Oligoketide cyclase/lipid
transport protein"
/pfam="Polyketide_cyc"
/product="cyclase/dehydrase"
/translation="MPTLTSGLRNLLRLTVDTDPFLIGTKFMLHQYREQGTFLCSPNE
VFQIVIDVERYPDFVPWCKAVYIKEKIDNQMVVDLLAAFHGIKGRYTSEVTFLSPSRT
NEGWIKA VSSNGIFKHLCKNKWQFIPIDENKTMVKFYIEFKFKSNSFSTLLNSVYKYTQ
SKIIA AFKDRAESLAKQKLP"

```

```

        /besthit="qcoverage 100 , hcoverage 100 , similarity 100
        , identity 100 , evalue 2.23e-127 , alnlength 180 ,
        Bacteria , Proteobacteria , ACN95788.1 cyclase/dehydrase
        [Wolbachia sp. wRi]"
gene      3168..3854
        /locus_tag="wEsol_00180"
CDS       3168..3854
        /locus_tag="wEsol_00180"
        /codon_start=1
        /transl_table=11
        /pfam="Thioredoxin_4 Thioredoxin_2 DSBA"
        /fullproduct="qcoverage 100 , hcoverage 100 , similarity
        100 , identity 100 , evalue 3.18e-162 , alnlength 228 ,
        Bacteria , Proteobacteria , WP_015589356.1 MULTISPECIES:
        DsbA family protein [unclassified Wolbachia]"
        /translation="MIFRLLLLSIFISVNSYAVVNQHIQKETNEITSKELLSLLPDDK
        LLGDPKAPILMIEYASLTCYHCSLFHKNVFPKIKEKYIDTGKMLYIFRHFPLDYRGLK
        AAMLSHCYEKQEDYFNFNKAVFNSIDSWNYYNLSDLTLLQRIAALSNLKQDAFNQCIN
        DKKIMDKIINDKSLAINKLGITATPIFFIKLNDGKSYIEHNKVKHEGYKELKYLTQVI
        DKLYGKAIVK"
        /product="DsbA family protein"
        /besthit="qcoverage 100 , hcoverage 100 , similarity 100
        , identity 100 , evalue 3.18e-162 , alnlength 228 ,
        Bacteria , Proteobacteria , WP_015589356.1 MULTISPECIES:
        DsbA family protein [unclassified Wolbachia]"
gene      complement(3894..4163)
        /locus_tag="wEsol_00181"
CDS       complement(3894..4163)
        /locus_tag="wEsol_00181"
        /codon_start=1
        /transl_table=11
        /pfam="CotH DUF2671"
        /fullproduct="qcoverage 97.752808988764 , hcoverage
        94.5652173913043 , similarity 100 , identity 100 , evalue
        2.43e-52 , alnlength 87 , Bacteria , Proteobacteria ,
        WP_007551133.1 MULTISPECIES: DUF2671 domain-containing
        protein [Wolbachia]"
        /translation="MSYTIASEVETLNKKSNNKNEGVMLLNNPAYREKYKERFDEAQRK
        VMDMVQFYDGTIVLIENKIAMYYYAWHSSKKREFERKKQQTVVVKQ"
        /product="DUF2671 domain-containing protein"
        /besthit="qcoverage 97.752808988764 , hcoverage
        94.5652173913043 , similarity 100 , identity 100 , evalue
        2.43e-52 , alnlength 87 , Bacteria , Proteobacteria ,
        WP_007551133.1 MULTISPECIES: DUF2671 domain-containing
        protein [Wolbachia]"
gene      4415..5062
        /locus_tag="wEsol_00182"
CDS       4415..5062
        /locus_tag="wEsol_00182"
        /codon_start=1
        /transl_table=11
        /fullproduct="qcoverage 100 , hcoverage 100 , similarity
        99.5 , identity 99.5 , evalue 7.82e-152 , alnlength 215 ,
        Bacteria , Proteobacteria , WP_015589357.1 MULTISPECIES:
        O-methyltransferase [unclassified Wolbachia]"
        /cog="COG4122 COG4122 219 Predicted O-methyltransferase"
        /pfam="Methyltransf_3 Pfam-B_2663 PCMT GCD14
        Methyltransf_31 Methyltransf_18 Methyltransf_26
        Methyltransf_24 Methyltransf_15 Cons_hypoth95"
        /product="O-methyltransferase"

```

```

/translation="MRNNFSIKLSYIRNLFKEFKTIEEYCCILEKKQHIQIGHEEGKL
LSLFIKIHKIKSIVEIGTLYGYSSICMAKALLEDGHIYTIENNPOYSRIAKKNFSAFN
LSDKITLIEGNALEKLNELSAKAPFDMIFIDVDKGGYPKYLDWAESYIKQDGLIVADN
TLLFNTVFLESPPKEVSEKSWHAMREFNRLSDEKKYFSILIPTDEGMTVALKLT"
/besthit="qcoverage 100 , hcoverage 100 , similarity 99.5
, identity 99.5 , evalue 7.82e-152 , alnlength 215 ,
Bacteria , Proteobacteria , WP_015589357.1 MULTISPECIES:
O-methyltransferase [unclassified Wolbachia]"
gene complement(5064..5717)
/locus_tag="wEsol_00183"
CDS complement(5064..5717)
/locus_tag="wEsol_00183"
/codon_start=1
/transl_table=11
/fullproduct="qcoverage 100 , hcoverage 100 , similarity
100 , identity 100 , evalue 5.32e-160 , alnlength 217 ,
Bacteria , Proteobacteria , WP_141457290.1 MULTISPECIES:
glutathione S-transferase family protein [unclassified
Wolbachia]"
/cog="Gst COG0625 211 Glutathione S-transferase"
/pfam="GST_N Glutaredoxin GST_N_3 GST_N_2 GST_C GST_C_2"
/product="glutathione S-transferase family protein"
/translation="MILYHFPLCPFSRKVRALLKEKKLGCDLVYENPWEKRNEFMEIN
PTGQVPVLIDNNFVIADSNACEYIEETYNVDKLFSGSSTIIKSKIRALINWFDNKFY
NEVTKYIMNEKVTITNRSPDSRFIYAAQHNLCHIEYVEHLINKNIWLATDKFTLADIT
LASHISVIDYVSSFPWEKSKILKEWYSIVKSKPCFREILLERISGLIPPKHYADLDF"
/besthit="qcoverage 100 , hcoverage 100 , similarity 100
, identity 100 , evalue 5.32e-160 , alnlength 217 ,
Bacteria , Proteobacteria , WP_141457290.1 MULTISPECIES:
glutathione S-transferase family protein [unclassified
Wolbachia]"
gene 6008..7651
/locus_tag="wEsol_00184"
CDS 6008..7651
/locus_tag="wEsol_00184"
/codon_start=1
/transl_table=11
/fullproduct="qcoverage 100 , hcoverage 100 , similarity
99.3 , identity 98.2 , evalue 0.0 , alnlength 547 ,
Bacteria , Proteobacteria , ERN55306.1 DNA polymerase III
subunits gamma and tau [Wolbachia pipientis wMelPop]"
/cog="DnaX COG2812 515 DNA polymerase III, gamma/tau
subunits"
/pfam="RuvB_N AAA_16 Pfam-B_18840 DNA_pol3_delta2 AAA_22
AAA AAA_17 AAA_18 TIP49 Pfam-B_5933 DNA_pol3_gamma3
DUF3646"
/product="DNA polymerase III subunits gamma and tau"
/translation="MGCIPTSLFVLSEAVNIALKHRPSSFKDVLVGQDILVRVLENAFI
LNKIPQSILLSGSSGVGKTTTARIIALCLNCSLGPIFEPCGSCENCLAIKNSSHPDVI
EIDAASHTSIDDIKVILGDICYSPISSKFKVYIIDEVHMLSSSAFNALLKTLEPPSS
VKFILATTEIKKIPITIIARCQRFDLHNIPVAKIVERLNDVAQKESYSIEKGALELIA
RHSGNSMRNALFLMNQAVLYSKDGAISTKNVTDILGLVDKDIIFDLLGAILEGDLQKA
LSVFDKAIKTANPLSIFEGLLQTIQLVCRFLITKEIDSAVTEYEKNRIKDLSIKRSLI
FFSRLWKVLLKGIQDIKTSTCNDVAAEMMLISLCYLSLPSPEQVIKKVLSQNVEQGN
RQGRPVAPSPSVIQVADYSDPKKYVESKQQPHSVIPVRDTGIHVENKQQNYDFDKILO
LLRRSNQIYLYKQLCNNLQLIDCKPGYLKLVKAVSKLDSNFCNDLKNYLNQATQQEWVI
TVDTGYINREVSNNLYAPAVKDILDMFKGAKVVNIENKE"
/besthit="qcoverage 100 , hcoverage 100 , similarity 99.3
, identity 98.2 , evalue 0.0 , alnlength 547 , Bacteria ,
Proteobacteria , ERN55306.1 DNA polymerase III subunits

```

gene gamma and tau [Wolbachia pipientis wMelPop]"  
7655..7987  
/locus\_tag="wEsol\_00185"  
CDS 7655..7987  
/locus\_tag="wEsol\_00185"  
/codon\_start=1  
/transl\_table=11  
/fullproduct="qcoverage 100 , hcoverage 100 , similarity  
100 , identity 100 , evalue 1.39e-67 , alnlength 110 ,  
Bacteria , Proteobacteria , WP\_015589360.1 YbaB/Ebfc  
family nucleoid-associated protein [Wolbachia  
endosymbiont of Drosophila simulans]"  
/cog="COG0718 COG0718 105 Uncharacterized protein  
conserved in bacteria"  
/pfam="YbaB\_DNA\_bd"  
/tigr="TIGR00103 DNA\_YbaB\_Ebfc 104 DNA-binding protein,  
YbaB/Ebfc family"  
/product="YbaB/Ebfc family nucleoid-associated protein"  
/translation="MDFSQIMKQQAQEMQKLAEAQEKYIGKEFQGISGGGKVSVLVEV  
IKIGSYKAKKVNIDLELMRNEEKDIVEDLVTAADFNDVKKAEEDMANATSDLAGMMGL  
PPGFKLPF"  
/besthit="qcoverage 100 , hcoverage 100 , similarity 100  
, identity 100 , evalue 1.39e-67 , alnlength 110 ,  
Bacteria , Proteobacteria , WP\_015589360.1 YbaB/Ebfc  
family nucleoid-associated protein [Wolbachia  
endosymbiont of Drosophila simulans]"

# ORIGIN

```

1  ttttcttgct cccttggttag caggatctat tttgagtcta gctgttaaga gcatttatac
61  tagaaatggg aaagagttta atcatcagac taatatatta ttattgttta actttgacca
121 agaatgcgaa aatTTTTTcaa agagtgatag gactaaatta aagtggctaa aaaattcagt
181 tattttgagc aacacaatct gtacatcttt aatgtttttc ggtgtgggat tagatttagt
241 tgccaacggc tttggtataa ctaactctat gatgttatcc ggcttattac tttcattacc
301 attcacgctt ttaattgtta cttcacctat tttaaatgct gcaagtaatt atatttctcaa
361 aaagacagct ataaattcaa ttgaggagca atttaaagggt gatgatcagt ttatagaagt
421 cgataacgaa aagccaagca gtactatgag caatcaaagt tatttcccca tcggtcagtt
481 aatatcatca aagtttagcta ttctccatag cgaagtctct agctaggaac aatgagccac
541 agattagtat ggttttgacg ttttggatag aggcttttaa tatgtgattt gatattgcat
601 cgccaattga ctcacactca attgctttta ttcctatggt attggctttt tccctaataca
661 agtttgattt tgttgctttg ggctcagact taacacaaac cgcacatagt agcttgatat
721 atggctttta gtgctctaag aactcttcca catttctggt acgagtaaca ccaaaaatta
781 tatagatacc ttcagcaaaa ttatctttta cccactgaaa tagtactcta gcaccatcat
841 tattgtgcgc accatctaaa aataattgcc aatcttttgg tagtaaagaa attaaattgc
901 cctcttttat acgctccagt tgtgcaggcc aataagtgca ctgtaaacct gaagtgatat
961 cctcttctcc aatatcaaat ccatattttc cactcaaaat gctacatgct gcaatagcat
1021 tgcttgcatg gattatttgg tgatcaccct ttaaagacgg caaaggaaat tctattgatt
1081 gaatagctga ttggaaaacc attttggtgt tctttttttt gcaattccat tcaaaacctc
1141 ctctatataa gggagatttc ttatttattg cgtggtattc tagcgtgttc attatagatt
1201 tttcttggtg tgctatcacg caaggaacat taggtttcat tattccagcc ttttcacctg
1261 ctataatttc tatagtaggg ccaagatatt ccgtatgatc aagtgcaatg gaagtaatta
1321 ttgttaaaat cggactatct ataacatttg ttgtatcaag tcttccaccc ataccactt
1381 caattaaagt tatatcggct ttgtgacgag aaaaagctaa aaaagctgca atagttgcag
1441 cttcaaacag agtgataggt tgttctgcaa ttacggcacg gcattcttct aacaagctat
1501 ataattcatt atcgtcgata taactgcctg caataactat tctttcatta aaattcacca
1561 aatgtggaga agtgatgagc tgtaccttat accctgctgc ttgcattata tatcttataa
1621 atgctagtgt tgagcctttc ccattagttc cagctatatg aattacggga ggcacttttt
1681 tctcgggatt atctagttta ctaagaaagc tttttatgcg atcaagagaa aaatcattcg
1741 gcctgctacc aagtggctta ggccaatgag gcataatat catagattat tgttacattt
1801 taattcacct atcacacttg ctatgccatg cgtgtcaatc ttctcactaa attgagaacg
1861 ttgattaata gcaatactta ttccactcat tacaacatca cttatcaaga aagaactgtg
1921 attttttagta acttttaaaat caatatttgt aaattcttca tcaccgtaag agaaccttgt

```

|      |             |             |             |             |             |             |
|------|-------------|-------------|-------------|-------------|-------------|-------------|
| 1981 | gccaatthaag | caagtttcat  | cgtcaactgc  | ttttgtactc  | attatgatca  | tttcactatt  |
| 2041 | actcatgtat  | ttagataaaa  | ttttaacgca  | caaacgtgta  | agatacactt  | catactctct  |
| 2101 | taagaaatct  | tccctttcct  | tccgggtagt  | caaaacccaa  | tattttccca  | tgacaaatcg  |
| 2161 | agatatttct  | ttgaggttaa  | cattattctg  | aatgacctcc  | tgaagctttt  | cgtgtacatg  |
| 2221 | ctctagggtt  | tttctatttc  | cttttgtaga  | tatgctgtct  | acttgttggt  | tcatagtatg  |
| 2281 | cacaaaaatt  | ttgtgatctg  | tacaattagt  | gtaagcactt  | gaagaaatta  | caataaaaaac |
| 2341 | aataatgatt  | aaaacttttag | taatattcat  | aagatatact  | taaaatgcaa  | agtttaataa  |
| 2401 | agattaaata  | acaattactg  | actttaatat  | acctatagac  | atgccctgtg  | taaatcatct  |
| 2461 | ataattcaag  | taggggtctg  | tgctatgcgt  | tatgagttaa  | gttaaatttc  | ccgagcgata  |
| 2521 | atttctagag  | aagggaattg  | cctctgctgg  | tttcgttgaa  | actaatatgc  | gatgccacc   |
| 2581 | ttaacttcag  | gtctcaggaa  | tctactaagg  | ctgacggtag  | atacggatcc  | ttttttgatt  |
| 2641 | ggtactaaat  | ttatgcttca  | tcaatacaga  | gaacaaggta  | ccttcctatg  | ttcgccctaat |
| 2701 | gaagtattcc  | aaattgtaat  | tgatgttgaa  | aggtatcctg  | atthttgttcc | ttgggtgcaa  |
| 2761 | gccgtttata  | taaaagaaaa  | aattgacaat  | caaagtgttg  | tggaccttct  | agcagctttt  |
| 2821 | catggaatta  | aaggaagata  | tacatcagag  | gtaacctttc  | tttctccaag  | tagaaciaaac |
| 2881 | gaaggttgga  | taaaagctgt  | atcatcaaat  | ggaatathta  | aacatctatg  | caataaatgg  |
| 2941 | caattcattc  | ccatagatga  | aaataaaact  | atggtaaagt  | tttatataga  | gtttaagtth  |
| 3001 | aagtccaact  | cattttcaac  | cctattaaac  | tcagtatata  | aatatacaca  | aagtaaaata  |
| 3061 | attgctgcat  | ttaaagacag  | ggctgaaagc  | cttgctaaac  | aaaagtthacc | ttgacactat  |
| 3121 | ttatataaat  | atataattht  | tttagtaagt  | taagtattta  | tatcgtaatg  | atthtttagac |
| 3181 | tattgcttht  | atcaattht   | ataagtgtta  | attcttatgc  | agttgttaac  | caacatattc  |
| 3241 | aaaaagaaac  | taatgaaata  | acatcaaagg  | agttactatc  | actattaccc  | gatgataaat  |
| 3301 | tattaggaga  | tccaaaagca  | ccaattctaa  | tgatagaata  | tgcttcatta  | acttgctatc  |
| 3361 | actgctctct  | ttttcataag  | aatgttht    | ctaaaataaa  | agagaaatat  | atagacacag  |
| 3421 | gtaagatgtt  | atatataat   | cgtcatttht  | ctttggatta  | cagagggcta  | aaggctgcaa  |
| 3481 | tgctaagtca  | ttgctacgaa  | aaacaagaag  | actactthta  | ttttaacaaa  | gctgttht    |
| 3541 | actcaataga  | ttcggtgaat  | tactacaatt  | taagtgattt  | gactthtacta | caaagaattg  |
| 3601 | ctgcactaag  | caacttaaa   | caagatgcat  | ttaaccaatg  | cattaatgat  | aagaaaatta  |
| 3661 | tggataaaat  | cataaatgat  | aatcactgg   | caattaataa  | acttggtatc  | acagctaccc  |
| 3721 | caatatht    | catcaagctt  | aacgatggta  | agtcataatat | agagcataat  | aaagttaaac  |
| 3781 | atgaagggtta | taaagagctg  | aaatacctca  | ctgatgtaat  | agataaaatta | tatggaaaag  |
| 3841 | ctatagtga   | gtaataccac  | tgtagcttac  | catataaaaag | actctatgct  | gagtcattgt  |
| 3901 | tttttcacga  | ctgthttgtt  | ttttttacgc  | tcaaactctc  | tttttttact  | gtgccaaagcg |
| 3961 | tagtaataca  | tagcaatht   | attctctatt  | aatactattg  | ttccatcata  | aaactgaacc  |
| 4021 | atatccataa  | ctthtctctg  | agcttcatca  | aaacgttctt  | tatacttht   | acgataagct  |
| 4081 | ggattatht   | gtaacataac  | cccttcattc  | ttgttagatt  | ttttgtthta  | cgtthtcaact |
| 4141 | tcgctagcaa  | tagtataaga  | catataaccc  | cctctaattg  | attataaaaa  | ttatatht    |
| 4201 | ataaagagaa  | atgcgcataa  | acaatctctt  | taattccagc  | acaataatcg  | actgcttatt  |
| 4261 | atactagtta  | actatagtac  | aatatataat  | aattcttgct  | acttaaaatt  | ttatactatg  |
| 4321 | aaataataac  | ttaaaataaa  | tgthtttatt  | atthtcaaact | atattattat  | atthtataaat |
| 4381 | tgtgtatgaa  | ttaaagcttcc | ctaathtata  | atctatgcgt  | aataatht    | gtataaaatt  |
| 4441 | gtcatacata  | agaaatctat  | ttgcaaaaaga | atthtaaaaca | atagaagaat  | attgtattct  |
| 4501 | tgaaaaaaag  | caacatattc  | agatcgcca   | tgaagaagga  | aagctattta  | gtthtattat  |
| 4561 | aaaaatccat  | aaaatcaaaa  | gtattgttga  | gattggcacg  | ttatacgggt  | attcgctcat  |
| 4621 | ttgcatggca  | aaagctctac  | tggaaagatgg | tcacatatat  | acaatagaaa  | ataaccctca  |
| 4681 | atactcaaga  | atagcaaaaa  | aaaathttag  | tgctthttaat | ctgagtgata  | aaattactct  |
| 4741 | aatagaaggc  | aatgcattgg  | aaaaactthta | tgaattatca  | gcaaaagcac  | catttgacat  |
| 4801 | gatathtattc | gatgttgata  | aaggtggthta | tcctaaatat  | ttagattggg  | cagagtcata  |
| 4861 | cattaaacaa  | gatgggctaa  | tcgttgcgaga | taacactcta  | ttgtthtaaca | cagtatht    |
| 4921 | agaatcgct   | ccaaaagaag  | tatcagaaaa  | atcatggcat  | gctatgaggg  | agthtaataa  |
| 4981 | tagattatca  | gatgaaaaaa  | aatathtctc  | tataattgatt | ccaactgatg  | aaggaatgac  |
| 5041 | tgtagcttht  | aagctaacat  | aagthtaaaaa | tcaaggtcag  | cataatgtth  | aggagggt    |
| 5101 | aaaccagaaa  | tcctctctaa  | taatatctca  | cgaaaacaag  | gctthtgatt  | aacaatggag  |
| 5161 | taccattctt  | ttaaaatht   | actthttht   | catggaaaac  | tacttacata  | gtctattaca  |
| 5221 | gaaatatgcg  | atgctaaagt  | aatatcagcc  | aaagtgaact  | tatcggttgc  | aagccaaatg  |
| 5281 | ttcttgthta  | ttaaagtgtt  | aacatattct  | atatggcaaa  | gcagattatg  | ctgagctgca  |
| 5341 | tagataaacc  | tagaatcagg  | gctgcggthta | gtaattactt  | tttcattcat  | aatatactta  |
| 5401 | gtaacttcat  | tgtaaaaat   | gttatcgaa   | caattgatta  | gagcgcgat   | tttagactta  |
| 5461 | ataatagtgg  | atgaacccaa  | taathtgacg  | tcgctattgt  | aagthtctt   | tatatattca  |
| 5521 | caaatggcat  | tactatccgc  | tattacaaag  | ttattatcta  | ttaaactggg  | tacttgcccc  |

```

5581 gttggattga tctccataaa ttcattccgt ttttcccacg gattttcata cactagatca
5641 caacccaact ttttttcttt gagaagggct ctaacttttc gtgaaaatgg acaaagagga
5701 aaatgatata aaatcataat attcctcttt tgttatccca gtacctatag gttgttattc
5761 cagtgtgtga cactgaaatc cacatctttt ttctctggat ccaagttggg atgacaagag
5821 aagagtattt taggtaacag ttgtttactc caaagtaatg ttgcaagagg tctaacatat
5881 aaattataag actaatatag gatatacctt gctaaataaa aaaaaagtat aatattttat
5941 aaggtatgca ggcaaaaact ctgtaatttg gtcagatcag aaatgaagca gccatatcag
6001 aacctttttg ggttgcatac ctacttcatt atttgtttta tccgaagctg tgaatatagc
6061 attaaaacat cgtcctagta gcttttaaga tctagtaggt caagatatat tagtgcgtgt
6121 attagaaaat gcttttattt taaacaaaat cccacaatct atactgctct ctggtagtag
6181 tggagttggg aaaaccacca ctgcaaggat aatagcttta tgtttgaatt gttccctggg
6241 gccaattttt gaaccttgcg gatcatgtga aaattgtcta gcaataaaaa attcaagcca
6301 tccagatgtg attgaaatcg atgcagcaag tcacactagc attgacgata ttaaagtaat
6361 cctgggagat atttgctatt cacctataag ctctaaattc aaagtctaca ttatagatga
6421 agtacatatg ttatccagca gtgcatttaa cgcattactt aaaaccctag aagagccacc
6481 atctagtgtg aaattcattt tagcaactac ggaaataaaa aagataccga taactattat
6541 tgcacgttgt caaagatttg atttacacaa cattcctgta gctaaaatag tggaacgttt
6601 aaatgatgtt gcacaaaaag agagttattc tattgaaaag ggagcattag aattaattgc
6661 acgacactct ggaaattcaa tgcgtaacgc cttgtttttg atgaatcaag cagtgtctata
6721 tagcaaagat ggtgcaatat ccactaaaaa tgtgacagac atacttggcc tagtggataa
6781 agatattata tttgatctat taggggcaat attagaaggt gatttacaga aagctctatc
6841 agtgtttgac aaggcgataa aaacagcaaa cccacttagt atttttgaag gtctattgca
6901 aacaattcag ttagtatgcc gttttttaat tacgaaagag attgatagtg cagttacaga
6961 gtatgaaaag aataggataa aagatttaag tataaagaga tctttaatat ttttttcaag
7021 attgtggaag gtgttgctta aaggatttca agatataaaa acttcaacat gcaacgatgt
7081 tgctgctgaa atgatgctaa ttagtctttg ctatctctct gatctacctt ctccagaaca
7141 ggtgatcaaa aaagttcttt cacaaaatgt agagcaagga aatagacagg gcagacctgt
7201 tgcaccttcc ccctctgtca tccaagtagc tgactactca gatccaaaaa aatatgtgga
7261 aagtaaacaa caacccact ctgtcatccc agtgcgtgac actgggatcc atgtggaaaa
7321 taaacaacaa aattacgatt ttgataagat tttgcaacta ttaaggcgga gtaaccaa
7381 ttatctttac aaacaactgt gtaataatct acaattaata gattgtaaac ctgggtattt
7441 aaaattaaaa gctgtatcta agttggacag taatttttgc aatgatttaa aaaattactt
7501 aaaccaggca actcagcagg agtgggttat tacagttgat acgggttata taaacaggga
7561 agtgagtaat ttaaattatg cacctgcagt caaggatata cttgacatgt ttaaagggtg
7621 aaaagtagtt aatatagaaa ataaggagta agttgtggat tttagtcaaa taatgaaaca
7681 agcgcaagag atgcaaaaaa agcttgcaag agctcaagaa aaatatattg gaaaagagtt
7741 tcaaggtatt tctggtggtg gcaaagtttc tgtattagtg gaagtcataa aaataggtag
7801 ctataaagct aaaaaggtga acatagactt agaacttatg agaaatgagg aaaaagatat
7861 agtagaggat ttagtaacag cagcgtttta tgatgccgtt aaaaaagcag aagaagatat
7921 ggcaaatgca acttctgatc tcgcaggat gatgggttta ccacctggat ttaaacttcc
7981 tttttgaatt tactactgaa gtttctttta gtgtaagtat tttttttcta atactagact
8041 tctttatata atgcgcctat agctagcaca gccctatgtc ataccgcaat tcattccaca
8101 actgtacgaa cattgcaata tggcacatag taaacgatgt cattccagtc tggaatccag
8161 ccttgccgta atctcatcaa gaacgttgtg ttttaacata aaacggctac ttttatgctt
8221 accaacttaa taaaattcct ggatcccaga ctgggatgac aagaagatg

```

//

```

LOCUS      JAQZAU010000025                6079 bp    dna        linear    ENV 17-MAR-2023
DEFINITION MAG: Wolbachia pipientis isolate wEsol contig_21001, whole genome
            shotgun sequence.
ACCESSION  JAQZAU010000025 JAQZAU010000000
VERSION    JAQZAU010000025.1
DBLINK     BioProject: PRJNA929258
            BioSample: SAMN33142973
KEYWORDS   WGS; ENV; Metagenome Assembled Genome; MAG.
SOURCE     Wolbachia pipientis (insect metagenome)
ORGANISM   Wolbachia pipientis
            Bacteria; Pseudomonadota; Alphaproteobacteria; Rickettsiales;
            Anaplasmataceae; Wolbachieae; Wolbachia.
REFERENCE  1 (bases 1 to 6079)
AUTHORS    Fiutek,N., Couger,B.M., Roy,S., de la Torre,J.R. and Connor,E.F.

```

TITLE Genomic assessment of the contribution of the Wolbachia  
 endosymbiont of Eurosta solidaginis to gall-induction  
 JOURNAL International Journal Molecular Sciences  
 REFERENCE 2 (bases 1 to 6079)  
 AUTHORS Fiutek,N., Couger,B.M., Roy,S., de la Torre,J.R. and Connor,E.F.  
 TITLE Direct Submission  
 JOURNAL Submitted (10-FEB-2023) Biology, San Francisco State University,  
 1600 Holloway Ave, San Francisco, CA 94132, USA  
 COMMENT ##Genome-Assembly-Data-START##  
 Assembly Date :: JUN-2019  
 Assembly Method :: FLYE v. 06-2019  
 Genome Representation :: Full  
 Expected Final Version :: Yes  
 Genome Coverage :: 100.0x  
 Sequencing Technology :: Illumina HiSeq; PacBio Sequel  
 ##Genome-Assembly-Data-END##  
 FEATURES Location/Qualifiers  
 source 1..6079  
 /organism="Wolbachia pipientis"  
 /mol\_type="genomic DNA"  
 /submitter\_seqid="contig\_21001"  
 /isolate="wEsol"  
 /isolation\_source="galls on Solidago altissima"  
 /host="Eurosta solidaginis MN-2018-EFC"  
 /db\_xref="taxon:955"  
 /environmental\_sample  
 /country="USA: Cowling Arboretum, Carleton College,  
 Northfield, MN"  
 /lat\_lon="44.48 N 93.13 W"  
 /altitude="280 m"  
 /collection\_date="2018-11"  
 /metagenome\_source="insect metagenome"  
 /note="metagenomic"  
 gene complement(251..1711)  
 /locus\_tag="wEsol\_00186"  
 CDS complement(251..1711)  
 /locus\_tag="wEsol\_00186"  
 /codon\_start=1  
 /transl\_table=11  
 /fullproduct="qcoverage 100 , hcoverage 100 , similarity  
 100 , identity 100 , evalue 0.0 , alnlength 486 ,  
 Bacteria , Proteobacteria , WP\_015589085.1 MULTISPECIES:  
 TrkH family potassium uptake protein [unclassified  
 Wolbachia]"  
 /cog="TrkG COG0168 499 Trk-type K+ transport systems,  
 membrane components"  
 /pfam="Pfam-B\_14546 Pfam-B\_11327 TrkH"  
 /tigr="TIGR00933 2a38 391 potassium uptake protein, TrkH  
 family"  
 /product="TrkH family potassium uptake protein"  
 /translation="MKNHQRLQTLRSIAFIVGIFLLFLSLAMLIPAITNKYLSYEWKN  
 FFAGFIITCTSGAIFILLGKLSRLHGMPAIFAITSCTWIALSLFAAIPFYFDNLSYVD  
 ALFETISGITTTGATIFNDIEKQSPGILLWRAMLHGMGGFGVITLGIADVFPFKVLSL  
 NNLLYSEYSDATKRKLPNTRSVVIHVTAIYYGLILLCIFSYLAGMPLFDAICHGMSA  
 VSTGGFANYNDSIGHYNNPILEAITIVFMILGSLPFLSYLKIIRRLDICYDEQVSYFV  
 KIATISSLFACFWLYKNVDLGVSLSFRCSTFTITSLITSTGYAICNHIDWSFISVLAF  
 FLTFVGGCSGSSSGGVKIFRLIVLLRSIRNYFYLLNPDADNGVKFNGKILENDEVHS  
 VFIFFAIFMLTFTISSIVMSYLSNADFITSISSVSATLTNSGPGFSNLIGPSGNYSSF  
 SNEVKLFLSFLMLLGRLEILPIYFCIGNLFLFNREK"  
 /besthit="qcoverage 100 , hcoverage 100 , similarity 100

```

, identity 100 , evalue 0.0 , alnlength 486 , Bacteria ,
Proteobacteria , WP_015589085.1 MULTISPECIES: TrkH family
potassium uptake protein [unclassified Wolbachia]"
gene 1853..2023
/locus_tag="wEsol_00187"
CDS 1853..2023
/locus_tag="wEsol_00187"
/codon_start=1
/transl_table=11
/fullproduct="qcoverage 100 , hcoverage 100 , similarity
100 , identity 100 , evalue 1.17e-28 , alnlength 56 ,
Bacteria , Proteobacteria , WP_167482803.1 MULTISPECIES:
hypothetical protein [unclassified Wolbachia]"
/translation="MVELTDAQEEILGSLRQAVRNDNFQEVQNVLNNKEHNDIQAVLS
HEGTLTSDKGTI"
/product="hypothetical protein"
/besthit="qcoverage 100 , hcoverage 100 , similarity 100
, identity 100 , evalue 1.17e-28 , alnlength 56 ,
Bacteria , Proteobacteria , WP_167482803.1 MULTISPECIES:
hypothetical protein [unclassified Wolbachia]"
gene 2119..3105
/locus_tag="wEsol_00188"
CDS 2119..3105
/locus_tag="wEsol_00188"
/codon_start=1
/transl_table=11
/fullproduct="qcoverage 100 , hcoverage 100 , similarity
100 , identity 100 , evalue 6.65e-230 , alnlength 328 ,
Bacteria , Proteobacteria , WP_015589084.1 MULTISPECIES:
hypothetical protein [unclassified Wolbachia]"
/translation="MCDYKVTKSFEDQPYFTDTIDDLKRFQGGKDPHSTHEYFALVQVV
QKIEDHKWMDLDSNLQEAIEENLDIDQVKAALENCGEDVERVLEREVYWSSGRVDALL
VYPLKVEYSEELNQEDVEKIKESFKLMFDAASPGLLGFEPPNGNMYMDKLTCAQKRFA
KIPGVGEQCFQDLIQEFEEKLSKNELDNAKINDQIAWDKEYATRFSQEINQDPSENDD
LNFIDDTDLQNTVNSAPTADNKTPEKNDTNFWSEHKGKIALGVVELCVVGAIAAYVL
AYPVVALVLEVLAVSALAVLAYIGGVCEKSESPNTKSSDPVVSGLVQQRRTV"
/product="hypothetical protein"
/besthit="qcoverage 100 , hcoverage 100 , similarity 100
, identity 100 , evalue 6.65e-230 , alnlength 328 ,
Bacteria , Proteobacteria , WP_015589084.1 MULTISPECIES:
hypothetical protein [unclassified Wolbachia]"
gene complement(3185..4201)
/locus_tag="wEsol_00189"
CDS complement(3185..4201)
/locus_tag="wEsol_00189"
/codon_start=1
/transl_table=11
/fullproduct="qcoverage 100 , hcoverage 100 , similarity
100 , identity 100 , evalue 7.92e-243 , alnlength 338 ,
Bacteria , Proteobacteria , WP_015589083.1 MULTISPECIES:
substrate-binding domain-containing protein [unclassified
Wolbachia]"
/cog="PstS COG0226 318 ABC-type phosphate transport
system, periplasmic component"
/pfam="PBP_like_2 PBP_like"
/tigr="TIGR02136 ptsS_2 295 phosphate binding protein"
/product="substrate-binding domain-containing protein"
/translation="MLRNFLLIFFVFLFTPPSNADARKYIRIVGSSTVFPPFISFIAEE
FNRVFPFKTPVVESIGSGSGFKMFCSGIGEDTPDITTSRPMKEVERELCKRNKINEV
IEIIIGYDGIVIANSNQSHRFDFTKKDLFETLSAYSQENDKLVKNNKKFWSDVNQALP

```

```

KTEIEIYGPHQNTGTYYETLVNSIMLDQYSCMNSRIFKENYKDQEERKKACGNIRDDGR
YIEVGINENIIQKLKSNKNALGIFSFSFLMRNQDKIQGSTIAGIEPTYENISSGKYI
LARPLYLYIKKEHLDTVDGLREFIKEIIDSIGIEDGYLSRLGLIPLSSEDIKKASAKV
YDIT"
/besthit="qcoverage 100 , hcoverage 100 , similarity 100
, identity 100 , evalue 7.92e-243 , alnlength 338 ,
Bacteria , Proteobacteria , WP_015589083.1 MULTISPECIES:
substrate-binding domain-containing protein [unclassified
Wolbachia]"
gene 4343..4900
/locus_tag="wEsol_00190"
CDS 4343..4900
/locus_tag="wEsol_00190"
/codon_start=1
/transl_table=11
/fullproduct="qcoverage 100 , hcoverage 100 , similarity
100 , identity 100 , evalue 6.36e-134 , alnlength 185 ,
Bacteria;Eukaryota , Proteobacteria;Arthropoda ,
WP_006280485.1 MULTISPECIES: dCTP deaminase [Wolbachia]"
/cog="Dcd COG0717 183 Deoxycytidine deaminase"
/pfam="dUTPase"
/tigr="TIGR02274 dCTP_deam 180 deoxycytidine triphosphate
deaminase"
/product="dCTP deaminase"
/translation="MAVMPPDKWIREKAENFGMIEPFVNHKSSKGVISFGLSSYGYDAR
VDNKFKIFTNVNSAIVDPKNFSENSFIDKETDVCIIPPNSFVLASTVEYFRIPRNVLV
ICVGKSTYARCGIIVNVTPLEPGWEGHVLTLEFSNTTPLPAKIYANEGACQFVFLSGES
ECEKSYDDMKGKYMNQHGITLPLVK"
/besthit="qcoverage 100 , hcoverage 100 , similarity 100
, identity 100 , evalue 6.36e-134 , alnlength 185 ,
Bacteria;Eukaryota , Proteobacteria;Arthropoda ,
WP_006280485.1 MULTISPECIES: dCTP deaminase [Wolbachia]"
gene complement(4906..5928)
/locus_tag="wEsol_00191"
CDS complement(4906..5928)
/locus_tag="wEsol_00191"
/codon_start=1
/transl_table=11
/fullproduct="qcoverage 100 , hcoverage 100 , similarity
100 , identity 100 , evalue 2.73e-235 , alnlength 340 ,
Bacteria;Eukaryota , Proteobacteria;Arthropoda ,
WP_141456986.1 MULTISPECIES: hypothetical protein
[unclassified Wolbachia]"
/translation="MPAVVNTPDNIQRPSKLKKAKEILLAPVRWLIIGLSVLLIIFV
ISFLVFLSIANVLSKLYLFAGGKAPEWLEQRAEAFMEAAARIPQTTHTDNDVNDAINV
QKLKENYGEPDIDDKFIEEIEGFIDQLECIANGTQKAADKDQLTEDEKKHALECLKRI
KNNPGTHSGSGLTLKQVLNLVWKACNDQTRANNIAINTRISQRKYQLVKHLVESQTEY
GVRGGRGSSACFTGTFNSIVSSLYTFEEFSFLQKADKNTIKQEFENELQKKGEELFNQ
LSNDKEKKEVAEALSNPSTNFFSSYVESFKNHSARAVLGDKECDKLKVTHTFSNLQYNK
TISRFT"
/product="hypothetical protein"
/besthit="qcoverage 100 , hcoverage 100 , similarity 100
, identity 100 , evalue 2.73e-235 , alnlength 340 ,
Bacteria;Eukaryota , Proteobacteria;Arthropoda ,
WP_141456986.1 MULTISPECIES: hypothetical protein
[unclassified Wolbachia]"

```

# ORIGIN

```

1 tctatagcta taccgccgcg aaccgtcatg ccgcgattca ttcgcggtat ctcttagcat
61 agatcccgcg aacaagtagc gggatgacga gaaaggggct acttggtatga cattcttcct
121 ggtgtgcccc aatcacaatg ttcgtacatc tgtggattta ttcgcggtat agatatcgct

```

|      |             |             |             |             |             |             |
|------|-------------|-------------|-------------|-------------|-------------|-------------|
| 181  | aacgagtagc  | ggaatgacgg  | tttttcaa    | tgctgtaagt  | cagtttagct  | ataatatcaa  |
| 241  | gtttcaccaa  | ctatttctct  | ctattaaata  | agaataaatt  | acctatacaa  | aaatagattg  |
| 301  | gcaatatttc  | aagtctgcc   | agcagcatta  | aaaacgatag  | aaataatttt  | acttcattac  |
| 361  | tgaaagagga  | ataattaccc  | gaaggaccta  | ttaaattact  | aaatcccggg  | ccagagtttg  |
| 421  | taagcgttgc  | agagactgaa  | ctgatgctag  | ttataaagtc  | tgcattgctt  | aagtaagaca  |
| 481  | tcactattga  | tgaaatggta  | aacgttaaca  | tgaaaattgc  | aaaaaatata  | aagacagagt  |
| 541  | gaacttcctc  | attctccaga  | atttttccat  | tgaattttac  | tccattgtct  | gcatcagggg  |
| 601  | ttaataaaag  | gtaaaagtaa  | tttcttatag  | accttaaaag  | aacaatcaag  | cgggaagattt |
| 661  | tgacaccacc  | acttgaagaa  | ccgctacatc  | caccaacaaa  | ggttagaaaa  | aaagctaaga  |
| 721  | ctgaaatgaa  | actccaatct  | atatgattac  | agattgcata  | accagttgac  | gtaatcaagg  |
| 781  | aagtgatggg  | aaatgtgctg  | catctaaatg  | ataatgacac  | tcctaaatca  | acattttttat |
| 841  | acaacccaaa  | acaagcaa    | aaagatgaga  | tagtagctat  | cttaacaaag  | taagagacct  |
| 901  | gttcatcata  | gcaa        | aaccgtctta  | taatttttaa  | atagctaaga  | aaaggcagag  |
| 961  | aacccaaa    | cataaaacg   | atcgttatgg  | cttctagtat  | gggattatta  | tagtgcctta  |
| 1021 | tagaatcatt  | atagttagca  | aatccaccag  | ttgatacagc  | agacattccg  | tgacatattg  |
| 1081 | catcaa      | atag        | gctagataat  | aggaaaat    | gcataacaaa  | attaagccat  |
| 1141 | aata        | atattg      | atcactacgc  | ttcgcggtgt  | cggcaacttc  | cttttggtag  |
| 1201 | catctgaata  | ttcagaataa  | agtaaattat  | ttaggctgag  | aaccttaaac  | ataggaaaaa  |
| 1261 | ctgcaattcc  | taaagtgatt  | acgccaaaac  | cccccatgcc  | gtgtagcatt  | gctctccaca  |
| 1321 | gcagtat     | tgagattgt   | ttttcaatat  | cattaaatat  | agttgcccct  | gtggtgtga   |
| 1381 | tgccagatat  | cgtttcaa    | aatgcatcaa  | catagctcag  | attatcaaaa  | tagaaaggaa  |
| 1441 | tagctgcaaa  | cagagacaag  | gcaatccagg  | tgcaactagt  | aatcgcaaaa  | attgctggca  |
| 1501 | ttccatgcaa  | tctacttaat  | ttaccgagta  | aaataaaaaat | tgccgagat   | gtgcaggtaa  |
| 1561 | ttatgaatcc  | agcgaaaaaa  | tttttccatt  | cgtagctgag  | atacttattg  | gtaatagcag  |
| 1621 | gaataagcat  | tgctaagcta  | aatagcaata  | ggaatattcc  | cacaataaat  | gcaattgaac  |
| 1681 | gtaaagtttg  | taaacgttga  | tgatttttca  | tagagttact  | tcctcgctat  | acaaagccat  |
| 1741 | aaaagctact  | ctaacgtcaa  | gcattttgtt  | ggcctttatt  | aacagttatt  | aacaatatac  |
| 1801 | ttgatttact  | tgtaaatatg  | tatgataa    | aaatttttat  | tagaggtaag  | atatggttga  |
| 1861 | attaactgat  | gcacaagaag  | aaattctagg  | ttcattaaga  | caggcagtc   | ggaatgacaa  |
| 1921 | ttttcaagaa  | gtccagaacg  | tactcaacaa  | taaggaacat  | aatgatatac  | aagcagtttt  |
| 1981 | gagccacgag  | gggactctga  | ctagtgacaa  | aggtagcatt  | taa         | aatgatgt    |
| 2041 | actaaaacta  | gcgttaacac  | taaagtaggg  | atcattgaac  | taatttggaa  | ggaagctgat  |
| 2101 | caaaaaactc  | gtgatttttt  | gtgtgattac  | aaggtaacaa  | aatcttttga  | agatcaacca  |
| 2161 | tatttttacgg | atacaataga  | tgatcttaaa  | cgctttcaag  | gaaaatttga  | ccctcatagc  |
| 2221 | acagaatatt  | ttgctcttgt  | acaagttgtt  | caaaaaatag  | aagatcacia  | gtgggtaatg  |
| 2281 | gatcttgatt  | ccaacttaca  | agaagcaata  | gaaaaccttg  | atattgatca  | agttaaagca  |
| 2341 | gcattagaga  | attgtggtga  | agatgtagaa  | agggttttag  | agcgagaggt  | atattggagt  |
| 2401 | agtggaagag  | tagatgccct  | tttagtttat  | cctctgaaag  | ttgaatatag  | tgaagaattg  |
| 2461 | aaccaagaag  | atgtggaaaa  | gataaaagaa  | agcttttaaat | taatgtttga  | tgctgcttct  |
| 2521 | ccagggctcc  | ttgggttcga  | gcccaatgga  | aataactatg  | taatggataa  | acttacatgt  |
| 2581 | gcacaaaaac  | gttttgctaa  | aatacctgga  | gtaggtgagc  | aatgctttca  | agatttgatt  |
| 2641 | caagaatttg  | aggaaaaact  | tagtaaaaaat | gaactagata  | atgccaaagat | taatgatcag  |
| 2701 | atagcatggg  | ataaagagta  | tgcgactcga  | ttttcacaa   | aaatcaatca  | ggatccgtct  |
| 2761 | gagaatgatg  | atcttaactt  | tatagatgac  | actgatctag  | atcaaaacac  | cgtaaaactct |
| 2821 | gcaccaactg  | cagacaacaa  | aaccccagaa  | aaaaacgata  | caaacttctg  | gagtgaacac  |
| 2881 | aaaggggaaga | tcgctctggg  | cgttgttgaa  | ctatgcgtag  | ttggtgctat  | tcgagcctat  |
| 2941 | gtgctggcat  | atcctgtagt  | tgcattagtt  | ttagaagttt  | tagcagtttc  | agcattggct  |
| 3001 | gtactagctt  | atattggagg  | agtttgtgag  | aaatcagaaa  | gcccaaatac  | gaaaagctcg  |
| 3061 | gacccggttg  | tttctggggg  | gttgcaacaa  | cgcagaactg  | tctaattagt  | aatccattgt  |
| 3121 | catcccagcg  | cgcgcgctg   | ggtctgacta  | cgctagaaca  | aagaatataa  | aagaaacgtt  |
| 3181 | gccgtcacgt  | tatatcataa  | acctttgctg  | aagctttctt  | tatatcttca  | cttgaaagtg  |
| 3241 | gaattagacc  | aagcctagat  | aggtacccat  | cttcaatgcc  | gatcgaaatc  | ataatttctt  |
| 3301 | ttatgaattc  | tcttaatcca  | tcaacagtat  | ccaggtgttc  | tttctttata  | taaaggtata  |
| 3361 | gaggtcttgc  | taatatatat  | tttcccgatg  | atataatttc  | gtaagttggc  | tcaattcctg  |
| 3421 | caattgtgct  | cccttgattt  | ttatcttgat  | tcctcattaa  | aaagctaaaa  | ctaaatatcc  |
| 3481 | ctaaagcggt  | cttggttactt | ttcaattttt  | gtattattat  | gttttcatta  | attccaactt  |
| 3541 | ctatatacct  | tccgtcatcc  | cttatattac  | cacatgcttt  | ctttctttct  | tcctgatctt  |
| 3601 | tataattctc  | tttgaaaatt  | ctcgagttca  | tgcatgaata  | ttgatcaagc  | ataatagaat  |
| 3661 | taaccaaaagt | ttcgatgtg   | cctgtatttt  | gatgtggacc  | ataaatttca  | atttctgttt  |
| 3721 | ttggtaaggc  | ttgatttaca  | tcagacaaa   | acttcttatt  | attttttact  | aatttatcat  |

```

3781 tttcttgaga atatgcagat aaagtttcaa ataagtcctt ctttgtgaaa tcaaattctat
3841 ggcttttgatt tgaatttgca atgacaattc catcatagcc aatgatgata tctatcactt
3901 cattaattttt atttctttta catagtcttc tttctacttc cttcataggg cgagatgaag
3961 tgggtgatgtc tggcgtgtct tcccctattc ctgagcaaaa cattttgaac cctgatccac
4021 ttcctattga ttcacaaact ggagtcttaa aagggaatac acgattgaac tcctcggcta
4081 taaacgagat aaaaggaaaa acagttgaag atccaacaat tctgatgtat ttcctggcat
4141 cagcatttga cggcggcgtg aataatacga atacaaaaat caggagaaag tttctaagca
4201 ttattttttag ttaagaacat aaatctaatt attgtaacaa aacatcaaac tgaaaagctt
4261 taattgcatg acaaaagcta cagtttacat ttaaatttta ttttatatta ttgtaagtat
4321 tacacaactt taagggaacag ttatggcagt tatgccagat aaatggataa gagaaaaagc
4381 tgaaaacttt ggaatgatag agccttttgt gaatcacaaa agcagcaaac gtgttatatc
4441 tttcggacta tcactcttacg gttacgatgc aagagtggat aataaattta aaatttttac
4501 taacgttaat tcagccatcg tggaccctaa aaatttttct gagaatagtt ttatagataa
4561 agaaacagac gtatgcataa ttccaccaa tagctttgtg cttgcaagta cagtggataa
4621 ttttcgtata ccaagggaatg tactggtcat ttgtgttggt aaatcaactt acgcaagatg
4681 tggaattata gtaaacgtta ctcccttaga acctggatgg gaaggtcatg tcacactcga
4741 attctcaaac accactccac ttcctgcaaa aattttacgt aatgaaggcg catgccaatt
4801 cgtattttta agcggcgaaa gtgaatgcga gaaatcatat gatgatatga aaggaaaata
4861 catgaatcag catggtatca ctttgccgtt agttaagtga ttacttttagg taaagcgtga
4921 tattgtttta ttgtactgaa gattactaaa atgagtttta actaatttgt cgcattcttt
4981 atcacctaaa actgcacgtg cagagtgggt tttaaatac tctacatagc ttgaaaagaa
5041 atttgtagaa ggattactta aagcttctgc aacttctttt ttttctttat cattggaaag
5101 ctgattaaat agttcttctc cttttttttg cagctcattt tcaaattcct gctttatagt
5161 attcttatct gctttttgca agaaggaaaa ctcttcaaaa gtgtacaagg aagagacaat
5221 actgttaaat gtgccagtaa aacatgcact tgaaccacga ccaccacgca ctccgtattc
5281 tgtttgcgat tctactaaat gttaaccag ttgataattt ctctgtgata tgcgggtatt
5341 aatagctata ttatttgctc tagtttgatc gttgcaagcc ttccaaacta aatttaaaac
5401 ttgcttcaat gttaaccgc ttccactatg tgtaccaggg ttatttttta tacgcttcaa
5461 gcaactcaagt gcatgttttt tctcatcttc tgtaagttga tctttatctg cagctttttg
5521 tgtgccattt gctatgcact ctaactgatc aataaatcct tctatttcct ctataaactt
5581 atcatcaata tcaggctcac cgtagttttc ttttagcttt tgaacgttaa tattaattgc
5641 atcatttaca tcagtatcat gcgttggttg tggaatacgt gctgcctcca taaatgcttc
5701 agctctttgc tctaaccatt ctggtgcttt gcctcctgca aaaagatata gcttactcaa
5761 tacattggcg attgagagaa acaccaggaa agaaataaca aatattatca aaagtactac
5821 agataaacct atgattagcc accttacagg agctagcaga atttcttttg ctttttttaa
5881 ttttgacggt ctttgatatg tgtctggtgt atttactact gctggcataa ttagtttaag
5941 ttaatataca tattattaat atactatatt ttttcttatt ttgtcaactc aaatttctac
6001 ttccgcactt tcttattggt gcttacaatg attatagcta caccatgtgc ttttcttaat
6061 tacaaacttc aactattca

```

//

```

LOCUS      JAQZAU010000026          741 bp    dna        linear    ENV 17-MAR-2023
DEFINITION MAG: Wolbachia pipientis isolate wEsol contig_22294, whole genome
            shotgun sequence.
ACCESSION  JAQZAU010000026  JAQZAU010000000
VERSION    JAQZAU010000026.1
DBLINK     BioProject: PRJNA929258
            BioSample: SAMN33142973
KEYWORDS   WGS; ENV; Metagenome Assembled Genome; MAG.
SOURCE     Wolbachia pipientis (insect metagenome)
ORGANISM   Wolbachia pipientis
            Bacteria; Pseudomonadota; Alphaproteobacteria; Rickettsiales;
            Anaplasmataceae; Wolbachieae; Wolbachia.
REFERENCE  1  (bases 1 to 741)
AUTHORS    Fiutek,N., Couger,B.M., Roy,S., de la Torre,J.R. and Connor,E.F.
TITLE      Genomic assessment of the contribution of the Wolbachia
            endosymbiont of Eurosta solidaginis to gall-induction
JOURNAL     International Journal Molecular Sciences
REFERENCE  2  (bases 1 to 741)
AUTHORS     Fiutek,N., Couger,B.M., Roy,S., de la Torre,J.R. and Connor,E.F.
TITLE      Direct Submission

```

JOURNAL Submitted (10-FEB-2023) Biology, San Francisco State University,  
1600 Holloway Ave, San Francisco, CA 94132, USA

COMMENT ##Genome-Assembly-Data-START##  
Assembly Date :: JUN-2019  
Assembly Method :: FLYE v. 06-2019  
Genome Representation :: Full  
Expected Final Version :: Yes  
Genome Coverage :: 100.0x  
Sequencing Technology :: Illumina HiSeq; PacBio Sequel  
##Genome-Assembly-Data-END##

FEATURES Location/Qualifiers  
source 1..741  
/organism="Wolbachia pipientis"  
/mol\_type="genomic DNA"  
/submitter\_seqid="contig\_22294"  
/isolate="wEsol"  
/isolation\_source="galls on Solidago altissima"  
/host="Eurosta solidaginis MN-2018-EFC"  
/db\_xref="taxon:955"  
/environmental\_sample  
/country="USA: Cowling Arboretum, Carleton College,  
Northfield, MN"  
/lat\_lon="44.48 N 93.13 W"  
/altitude="280 m"  
/collection\_date="2018-11"  
/metagenome\_source="insect metagenome"  
/note="metagenomic"  
gene complement(<1..215)  
/locus\_tag="wEsol\_00192"  
CDS complement(<1..215)  
/locus\_tag="wEsol\_00192"  
/codon\_start=1  
/transl\_table=11  
/product="hypothetical protein"  
/translation="MTHQVNSKLKEKDEKNILKLASKIKGKKSSIAEELEKISKKEK  
QRILTTEVSKHRGKEPTIISLAYAILR"  
/besthit="qcoverage 100 , hcoverage 75.531914893617 ,  
similarity 100 , identity 98.6 , evaluate 4.26e-35 ,  
alnlength 71 , Bacteria , Proteobacteria , RLT59986.1  
hypothetical protein WANA31\_0645, partial [Wolbachia  
endosymbiont of Drosophila ananassae]"  
gene 665..>741  
/locus\_tag="wEsol\_00193"  
CDS 665..>741  
/locus\_tag="wEsol\_00193"  
/codon\_start=1  
/transl\_table=11  
/product="hypothetical protein"  
/translation="MTEETKDGYSLYVAIQEGNIEAAE"  
/besthit="qcoverage 100 , hcoverage 13.3689839572193 ,  
similarity 100 , identity 100 , evaluate 1.14e-06 ,  
alnlength 25 , Bacteria , Proteobacteria , WP\_179949445.1  
ankyrin repeat domain-containing protein, partial  
[Wolbachia endosymbiont of Drosophila santomea]"

ORIGIN  
1 ttacgtagta tagcataagc aagtgatata atagttgggt ctttaccocg atgtttgctt  
61 acttccgtag taagaatcct ttgtttttcc ttttttagata ttttttctag ttcttcagca  
121 atgctacttt ttttgccttt tattttttgat gctaatttta aaatatTTTT ttcattcttc  
181 tctttcaatt tcgaatcggt tacctgatga gtcatttttt ttctcaaggt ctttcttatt  
241 aaactaagta taacattttcc tctcttcgtg gttataatat ttgcttttat gaatcagttg

```

301 tgttgataat gtattaattg catagttcag acattgtttt ataaagcaaa attttagtag
361 accaccttac aagaacgttt cttgctaatt ctgaatccga aaaaaggacg cagtaaagtt
421 atttgtaagg gaagaatgaa acttgtagct atagctaaac tgacttacga taatttgaaa
481 aaccgtcatc ccgctgcttg ttagcgggat ctagagatac cgcggcggta tgacggttcg
541 cagtggatat acggttcgcg gcgggatgac gataagctcg tcatcccgtc acattaatat
601 tgtattaata aaaacttaat aataatcctt aataatatat gaactaacat gttcgcgaatt
661 tcgtatgaca gaggaacaaa aagatggata tgcttcctta tatgttgcaa ttcaggaagg
721 taatattgaa gctgcagaac t

```

//

```

LOCUS      JAQZAU010000027          529 bp    dna        linear    ENV 17-MAR-2023
DEFINITION MAG: Wolbachia pipientis isolate wEsol contig_23028, whole genome
            shotgun sequence.
ACCESSION  JAQZAU010000027  JAQZAU010000000
VERSION    JAQZAU010000027.1
DBLINK     BioProject: PRJNA929258
            BioSample: SAMN33142973
KEYWORDS   WGS; ENV; Metagenome Assembled Genome; MAG.
SOURCE     Wolbachia pipientis (insect metagenome)
  ORGANISM Wolbachia pipientis
            Bacteria; Pseudomonadota; Alphaproteobacteria; Rickettsiales;
            Anaplasmataceae; Wolbachieae; Wolbachia.
REFERENCE  1  (bases 1 to 529)
  AUTHORS  Fiutek,N., Couger,B.M., Roy,S., de la Torre,J.R. and Connor,E.F.
  TITLE    Genomic assessment of the contribution of the Wolbachia
            endosymbiont of Eurosta solidaginis to gall-induction
  JOURNAL   International Journal Molecular Sciences
REFERENCE  2  (bases 1 to 529)
  AUTHORS  Fiutek,N., Couger,B.M., Roy,S., de la Torre,J.R. and Connor,E.F.
  TITLE    Direct Submission
  JOURNAL   Submitted (10-FEB-2023) Biology, San Francisco State University,
            1600 Holloway Ave, San Francisco, CA 94132, USA
COMMENT    ##Genome-Assembly-Data-START##
            Assembly Date      :: JUN-2019
            Assembly Method    :: FLYE v. 06-2019
            Genome Representation :: Full
            Expected Final Version :: Yes
            Genome Coverage    :: 100.0x
            Sequencing Technology :: Illumina HiSeq; PacBio Sequel
            ##Genome-Assembly-Data-END##
FEATURES   Location/Qualifiers
    source  1..529
            /organism="Wolbachia pipientis"
            /mol_type="genomic DNA"
            /submitter_seqid="contig_23028"
            /isolate="wEsol"
            /isolation_source="galls on Solidago altissima"
            /host="Eurosta solidaginis MN-2018-EFC"
            /db_xref="taxon:955"
            /environmental_sample
            /country="USA: Cowling Arboretum, Carleton College,
            Northfield, MN"
            /lat_lon="44.48 N 93.13 W"
            /altitude="280 m"
            /collection_date="2018-11"
            /metagenome_source="insect metagenome"
            /note="metagenomic"
    gene     complement(<1..>529)
            /locus_tag="wEsol_00194"
    CDS      complement(<1..>529)
            /locus_tag="wEsol_00194"

```

```
/codon_start=1
/transl_table=11
/product="putative DNA primase (bacterial type)"
/translation="ISICMDGDSAGRHAATRVAELALPILEPGYTLKFVTLPSNKDPY
DICNELAYKKEDVLTALDHSTKLHSEYLWHHIIDSNLQNYEKLAPEKYSILEHKFMEY
VNTISNSSIRRYRDYFYNKASELRSSFKKQIFNSKTGATKGEYLNKSPELIEAEQN
QAVILRIAVEFPEILN"
/cog="DnaG COG0358 568 DNA primase (bacterial type)"
/besthit="qcoverage 100 , hcoverage 59.6610169491525 ,
similarity 98.9 , identity 97.7 , evaluate 1.47e-116 ,
alnlength 176 , Bacteria , Proteobacteria ,
WP_006279250.1 toprim domain-containing protein, partial
[Wolbachia endosymbiont of Muscidifurax uniraptor]"
```

ORIGIN

```
1 gttcaaaatt tcaggaaatt ctacggctat acgcaaaatt acggcctgat tttgctctgc
61 ttcaattagc tctggagatt tggtatgaag atactcacct tttgttgctc cagttttact
121 attaaaaatc tgttttttga agctacttct tagttcacta gccttattgt aaaaataatc
181 tctgtaatac cttctaatac tgctgttgct aatagtattt acatattcca tgaacttggtg
241 ctcaagaatt gaatatTTTT cggagcaag tttttcataa ttttgcaaat tgctatcgat
301 tatgtgatgc cataaatatt cagaatgcag ttttggtgaa tgggtcaagag cagtcaacac
361 gtcttctttc ttgtatgccg gttcgttaca tatatcgat ggatctttat tacttggtgaa
421 agtcacaaac tttaacgtgt atccaggctc taatattggc agagcaagtt ctgcaactcg
481 agtagcagca tgacgtccag cactatcgcc atccatacag atggagatt
```

//

LOCUS JAQZAU010000028 698 bp dna linear ENV 17-MAR-2023

DEFINITION MAG: Wolbachia pipientis isolate wEsol contig\_23078, whole genome  
shotgun sequence.

ACCESSION JAQZAU010000028 JAQZAU010000000

VERSION JAQZAU010000028.1

DBLINK BioProject: PRJNA929258

BioSample: SAMN33142973

KEYWORDS WGS; ENV; Metagenome Assembled Genome; MAG.

SOURCE Wolbachia pipientis (insect metagenome)

ORGANISM Wolbachia pipientis

Bacteria; Pseudomonadota; Alphaproteobacteria; Rickettsiales;  
Anaplasmataceae; Wolbachieae; Wolbachia.

REFERENCE 1 (bases 1 to 698)

AUTHORS Fiutek,N., Couger,B.M., Roy,S., de la Torre,J.R. and Connor,E.F.

TITLE Genomic assessment of the contribution of the Wolbachia  
endosymbiont of Eurosta solidaginis to gall-induction

JOURNAL International Journal Molecular Sciences

REFERENCE 2 (bases 1 to 698)

AUTHORS Fiutek,N., Couger,B.M., Roy,S., de la Torre,J.R. and Connor,E.F.

TITLE Direct Submission

JOURNAL Submitted (10-FEB-2023) Biology, San Francisco State University,  
1600 Holloway Ave, San Francisco, CA 94132, USA

COMMENT ##Genome-Assembly-Data-START##

Assembly Date :: JUN-2019

Assembly Method :: FLYE v. 06-2019

Genome Representation :: Full

Expected Final Version :: Yes

Genome Coverage :: 100.0x

Sequencing Technology :: Illumina HiSeq; PacBio Sequel

##Genome-Assembly-Data-END##

FEATURES Location/Qualifiers

source 1..698

/organism="Wolbachia pipientis"

/mol\_type="genomic DNA"

/submitter\_seqid="contig\_23078"

/isolate="wEsol"

```

/isolation_source="galls on Solidago altissima"
/host="Eurosta solidaginis MN-2018-EFC"
/db_xref="taxon:955"
/environmental_sample
/country="USA: Cowling Arboretum, Carleton College,
Northfield, MN"
/lat_lon="44.48 N 93.13 W"
/altitude="280 m"
/collection_date="2018-11"
/metagenome_source="insect metagenome"
/note="metagenomic"
gene <1..128
/locus_tag="wEsol_00195"
CDS <1..128
/locus_tag="wEsol_00195"
/codon_start=1
/transl_table=11
/product="hypothetical protein"
/translation="PNDLCTDNAIMVGWTGIERLQKNYIDPLNFAPRPKWELESY"
/cog="QRI7 COG0533 342 Metal-dependent proteases with
possible chaperone activity"
/besthit="qcoverage 100 , hcoverage 51.25 , similarity
100 , identity 100 , evalue 2.17e-24 , alnlength 41 ,
Bacteria , Proteobacteria , EAL57873.1 peptidase, M22
family protein, partial [Wolbachia endosymbiont of
Drosophila ananassae]"
gene complement(186..395)
/locus_tag="wEsol_00196"
CDS complement(186..395)
/locus_tag="wEsol_00196"
/codon_start=1
/transl_table=11
/fullproduct="qcoverage 100 , hcoverage 87.3417721518987
, similarity 100 , identity 97.1 , evalue 3.43e-42 ,
alnlength 69 , Bacteria , Proteobacteria , WP_210437498.1
hypothetical protein, partial [Wolbachia endosymbiont of
Drosophila auraria]"
/translation="MPMEGTSKNLVRLRGKYVAVHFRLTSIMRLDKFIVISDRGENHM
LLTTYVKLPRIMEKICCFDLCENYC"
/product="hypothetical protein, partial"
/besthit="qcoverage 100 , hcoverage 87.3417721518987 ,
similarity 100 , identity 97.1 , evalue 3.43e-42 ,
alnlength 69 , Bacteria , Proteobacteria , WP_210437498.1
hypothetical protein, partial [Wolbachia endosymbiont of
Drosophila auraria]"
gene complement(481..>698)
/locus_tag="wEsol_00197"
CDS complement(481..>698)
/locus_tag="wEsol_00197"
/codon_start=1
/transl_table=11
/pfam="Transposase_20"
/fullproduct="qcoverage 100 , hcoverage 98.61111111111111
, similarity 100 , identity 100 , evalue 2.23e-44 ,
alnlength 71 , Bacteria , Proteobacteria , WP_179943635.1
transposase [Wolbachia endosymbiont of Drosophila
simulans]"
/translation="TPRQYSSGEVDRHGSISKMGPPPCRSMLEYAAQTMLTVTKRTFK
LKNWGCEEKRNEKSNCSSSKKISCNYA"
/product="transposase"

```

/besthit="qcoverage 100 , hcoverage 98.61111111111111 ,  
similarity 100 , identity 100 , evaluate 2.23e-44 ,  
alnlength 71 , Bacteria , Proteobacteria , WP\_179943635.1  
transposase [Wolbachia endosymbiont of Drosophila  
simulans]"

ORIGIN

```
1 cccctaacga cctatgtaca gacaatgcaa ttatggttgg atggacagga attgaaaggt
61 tacagaaaaa ttatatagat ccacttaatt ttgcaccaag accaaagtgg gaattggaaa
121 gttattaaaa gctctcaatt ctgaattata gctaaagtga cttaggttct ctaattgcac
181 ataagtcaac aataattttc acacaaatca aaacagcata tcttctccat aatccttggt
241 aattttacat aagttaaaag tagcatatgg ttctctccgc ggtctgagat gacaataaat
301 ttgtcaagcc gcattatact tgtaggcgg aagtggacgg caacatattt accacgaagt
361 ctaactaagt tcttgcttgt cccttccatc ggcattgcta tctttatttt caataaaatt
421 attgtcctat gctcttttga tgtttattga taataaaatt ctgtttttatc aaccaacatc
481 ctatgcataa ttacagctaa ttttcttgct actgctacaa ttgctttttt cattcctttt
541 ttcttcgcaa ccccgatttt ttaattttaa tgcctcttgg gtaactgtaa gcattgtttg
601 tgcagcttca tataacatac ttctacattc cgggtgtccc atctttgata tgctgccatg
661 ccgatcaact tctccagaag aatattgcct tgggtgtca
```

//

LOCUS JAQZAU010000029 646 bp dna linear ENV 17-MAR-2023

DEFINITION MAG: Wolbachia pipientis isolate wEsol contig\_23080, whole genome  
shotgun sequence.

ACCESSION JAQZAU010000029 JAQZAU010000000

VERSION JAQZAU010000029.1

DBLINK BioProject: PRJNA929258  
BioSample: SAMN33142973

KEYWORDS WGS; ENV; Metagenome Assembled Genome; MAG.

SOURCE Wolbachia pipientis (insect metagenome)

ORGANISM Wolbachia pipientis  
Bacteria; Pseudomonadota; Alphaproteobacteria; Rickettsiales;  
Anaplasmataceae; Wolbachieae; Wolbachia.

REFERENCE 1 (bases 1 to 646)

AUTHORS Fiutek,N., Couger,B.M., Roy,S., de la Torre,J.R. and Connor,E.F.  
TITLE Genomic assessment of the contribution of the Wolbachia  
endosymbiont of Eurosta solidaginis to gall-induction  
JOURNAL International Journal Molecular Sciences

REFERENCE 2 (bases 1 to 646)

AUTHORS Fiutek,N., Couger,B.M., Roy,S., de la Torre,J.R. and Connor,E.F.  
TITLE Direct Submission  
JOURNAL Submitted (10-FEB-2023) Biology, San Francisco State University,  
1600 Holloway Ave, San Francisco, CA 94132, USA

COMMENT ##Genome-Assembly-Data-START##

Assembly Date :: JUN-2019  
Assembly Method :: FLYE v. 06-2019  
Genome Representation :: Full  
Expected Final Version :: Yes  
Genome Coverage :: 100.0x  
Sequencing Technology :: Illumina HiSeq; PacBio Sequel  
##Genome-Assembly-Data-END##

FEATURES Location/Qualifiers

source 1..646  
/organism="Wolbachia pipientis"  
/mol\_type="genomic DNA"  
/submitter\_seqid="contig\_23080"  
/isolate="wEsol"  
/isolation\_source="galls on Solidago altissima"  
/host="Eurosta solidaginis MN-2018-EFC"  
/db\_xref="taxon:955"  
/environmental\_sample  
/country="USA: Cowling Arboretum, Carleton College,

```

Northfield, MN"
/lat_lon="44.48 N 93.13 W"
/altitude="280 m"
/collection_date="2018-11"
/metagenome_source="insect metagenome"
/note="metagenomic"
gene      <1..222
          /locus_tag="wEsol_00198"
CDS       <1..222
          /locus_tag="wEsol_00198"
          /codon_start=1
          /transl_table=11
          /product="hypothetical protein"
          /translation="EKLIKDLHQNNNQKEQRYTRNQDMTVIEGAISSQLGLKIKINDN
          NSKGKVMIRYDNPNELDLILKILNRKLEA"
          /besthit="qcoverage 100 , hcoverage 25.7950530035336 ,
          similarity 100 , identity 100 , evaluate 1.97e-39 ,
          alnlength 73 , Bacteria , Proteobacteria , WP_006279814.1
          MULTISPECIES: ParB/RepB/Spo0J family partition protein
          [Wolbachia]"
gene      complement(335..511)
          /locus_tag="wEsol_00199"
CDS       complement(335..511)
          /locus_tag="wEsol_00199"
          /codon_start=1
          /transl_table=11
          /product="hypothetical protein"
          /translation="MAKDCTNVAITKTISTRVSRGTGMPFFFLDPSSLGTGMTATLTI
          VTPLLVSgyRGGMT"
gene      complement(527..>646)
          /locus_tag="wEsol_00200"
CDS       complement(527..>646)
          /locus_tag="wEsol_00200"
          /codon_start=1
          /transl_table=11
          /product="hypothetical protein"
          /translation="LVAIKSSLILLVKRLKHKRQYFKADNNPRVSFAFFFIW"

```

#### ORIGIN

```

1  gaaaaactga taaaggacct acatcaaaac aacaatcaaa aagagcagag atatactaga
61  aatcaagata tgacagtaat agaaggcgct atatcttctc aacttggttt aaagatcaaa
121  attaatgaca acaattctaa gggtaaagtt atgatacggg atgataatcc aaatgaattg
181  gatttgatat tgaaaatttt gaataggaaa cttgaggcat agctagtagt tggctagcaa
241  agcaacaaac caatatcaac tgttggtgtc atgaaagtag ctgacactgg aatccaggaa
301  ttttattaag ttggtaagca taaaagtata acttctacgt cataccgccg cggtatccgc
361  taacaagcag cgggggtgacg attgtcaggg tagctgtcat cccagtgcc agactacttg
421  gatccaggaa aaagaatggg gtcaccccag tgcgtgatac cctagtagaa atcgtttttg
481  taattgcaac attcgtgcaa tcttttagcca taaatattta aaaaatttac caaatgaaaa
541  aaaaggcaaa agaaaccctg gggttattat ccgctttaaa atattggcgt tttttatggt
601  ttaaagcgtt gacaagcaag attaagctgc ttttaattgc aactaa

```

//

```

LOCUS      JAQZAU010000030          7725 bp    dna        linear    ENV 17-MAR-2023
DEFINITION MAG: Wolbachia pipientis isolate wEsol contig_25003, whole genome
            shotgun sequence.
ACCESSION  JAQZAU010000030  JAQZAU010000000
VERSION    JAQZAU010000030.1
DBLINK     BioProject: PRJNA929258
            BioSample: SAMN33142973
KEYWORDS   WGS; ENV; Metagenome Assembled Genome; MAG.
SOURCE     Wolbachia pipientis (insect metagenome)

```

ORGANISM *Wolbachia pipientis*  
 Bacteria; Pseudomonadota; Alphaproteobacteria; Rickettsiales;  
 Anaplasmataceae; Wolbachieae; Wolbachia.

REFERENCE 1 (bases 1 to 7725)  
 AUTHORS Fiutek,N., Couger,B.M., Roy,S., de la Torre,J.R. and Connor,E.F.  
 TITLE Genomic assessment of the contribution of the Wolbachia  
 endosymbiont of *Eurosta solidaginis* to gall-induction  
 JOURNAL International Journal Molecular Sciences

REFERENCE 2 (bases 1 to 7725)  
 AUTHORS Fiutek,N., Couger,B.M., Roy,S., de la Torre,J.R. and Connor,E.F.  
 TITLE Direct Submission  
 JOURNAL Submitted (10-FEB-2023) Biology, San Francisco State University,  
 1600 Holloway Ave, San Francisco, CA 94132, USA

COMMENT ##Genome-Assembly-Data-START##  
 Assembly Date :: JUN-2019  
 Assembly Method :: FLYE v. 06-2019  
 Genome Representation :: Full  
 Expected Final Version :: Yes  
 Genome Coverage :: 100.0x  
 Sequencing Technology :: Illumina HiSeq; PacBio Sequel  
 ##Genome-Assembly-Data-END##

FEATURES Location/Qualifiers  
 source 1..7725  
 /organism="Wolbachia pipientis"  
 /mol\_type="genomic DNA"  
 /submitter\_seqid="contig\_25003"  
 /isolate="wEsol"  
 /isolation\_source="galls on *Solidago altissima*"  
 /host="Eurosta solidaginis MN-2018-EFC"  
 /db\_xref="taxon:955"  
 /environmental\_sample  
 /country="USA: Cowling Arboretum, Carleton College,  
 Northfield, MN"  
 /lat\_lon="44.48 N 93.13 W"  
 /altitude="280 m"  
 /collection\_date="2018-11"  
 /metagenome\_source="insect metagenome"  
 /note="metagenomic"  
 gene complement(<1..1705)  
 /locus\_tag="wEsol\_00201"  
 CDS complement(<1..1705)  
 /locus\_tag="wEsol\_00201"  
 /codon\_start=1  
 /transl\_table=11  
 /pfam="Toprim\_4 Toprim\_3 AAA\_25"  
 /fullproduct="qcoverage 100 , hcoverage 83.2844574780059  
 , similarity 99.3 , identity 98.8 , evalue 0.0 ,  
 alnlength 568 , Bacteria , Proteobacteria ,  
 WP\_226079819.1 AAA family ATPase [*Wolbachia* endosymbiont  
 of *Tribolium confusum*]"  
 /translation="MDIYCSQRNGHYKLLGKKEQLRTQLLSNIRSCLSYLLPRGTFRG  
 DKFYVGDLDQSGKSKSMIVELTGSKAGLWHDFSTGEGGDIFDLWAAVTGKNQFTDTIED  
 IAKWIGYSEKNNLTGQPTASWNYDESQVIATVYRYNTDSGKRYLPFDVVRSSFTPP  
 ETRPLYNIPGIMKSDKVILVEGEKCADALIEQGMTATTAMLGANAPIEKTDWSPKLGK  
 HVIIWPDNDEPGKQYAEKVVKKLTFLGVLSTLLEIPDNKPKGWDSADGIEEKMNIPE  
 FIENNSKKIIVKQLLNIQEWSVERFIGPVPEQKFLVEGLFPLGVTSILAAMGDTGKGM  
 LLLDLALKVASRKDQPCGFGPLVTEHGSVVFSAEDDMSEIHRRLERLDSQCERLKYK  
 DRLFIVPLPNVSGSLTIKSVSGKVIETSPEFESITKQLNKKIDKLIVFDPLASFVH  
 ADLNTDPAVG DYLSLLSDLAGSTGASII TAHMRKPKSEKPISTVEQARDAIRGTSA  
 LVNGVRCSYAFWSVEDTAKLTIFKSIGESVRQNALFYGAIVKANGLADRTLRTLYRNE"

```

ET"
/product="AAA family ATPase"
/besthit="qcoverage 100 , hcoverage 83.2844574780059 ,
similarity 99.3 , identity 98.8 , evaluate 0.0 , alnlength
568 , Bacteria , Proteobacteria , WP_226079819.1 AAA
family ATPase [Wolbachia endosymbiont of Tribolium
confusum]"
gene complement(1723..2961)
/locus_tag="wEsol_00202"
CDS complement(1723..2961)
/locus_tag="wEsol_00202"
/codon_start=1
/transl_table=11
/pfam="AAA_25 DnaB_C AAA_31"
/fullproduct="qcoverage 100 , hcoverage 100 , similarity
99.3 , identity 98.5 , evaluate 1.07e-298 , alnlength 412 ,
Bacteria , Proteobacteria , WP_226079818.1 AAA family
ATPase [Wolbachia endosymbiont of Tribolium confusum]"
/translation="MKYDEGKLWAAVITRAIQDAAGKNPKLKKEACQWIRSRSFETVC
ELANLDFKRLKNMLNKFNGINKENFMDFFSSKNALKIKSLLINNIDCLSYLLPEGKSYQ
NKFYIGSRNGNKIIVEMEGENAGNWNLYLIEKKGNIIDLWTLVKGNIDSAETWLNKGD
ERSSILQEKQNEEKAFSVNHYLNDKSPMPKDIIGPRILTPGGLLVIGGTPKIGKSHFL
LSLLVHLAAGRSFLGMKPARPLKIFYLQNEMEYDYIRERIQQNLKPLHLATENLVVTN
KMNLTNLNEEGIEKIKDMIAEKFDLVVIDSPYNSVNYGLQHAIEKLRSKINPMAGIIIT
NHTKKVSTSTLEKNPFQALVGANALRSFYTSGIVIFQPNKRTNIIQVVEYELRNGRSIP
TKFINKINGCWKTANVIART"
/product="AAA family ATPase"
/besthit="qcoverage 100 , hcoverage 100 , similarity 99.3
, identity 98.5 , evaluate 1.07e-298 , alnlength 412 ,
Bacteria , Proteobacteria , WP_226079818.1 AAA family
ATPase [Wolbachia endosymbiont of Tribolium confusum]"
gene complement(2958..3458)
/locus_tag="wEsol_00203"
CDS complement(2958..3458)
/locus_tag="wEsol_00203"
/codon_start=1
/transl_table=11
/pfam="Pfam-B_8806"
/fullproduct="qcoverage 100 , hcoverage 100 , similarity
100 , identity 100 , evaluate 4.97e-115 , alnlength 166 ,
Bacteria , Proteobacteria , WP_182364992.1 MULTISPECIES:
hypothetical protein [Wolbachia]"
/translation="MLQDFLTDFNNAKLQSSLIPKGTIVKVKMAIKPGGYENWFTKNY
TTGSIYLNTEFTVTEGPYAKRKIFQIIGIKNGKAEGEEDIWGESGRSMLRSILESSRN
IHANDTSEKAVTARKINSIADFNDLEFTAKVGVETNNTYGDRNRITTVITPELQKSFQ
DDWLPF"
/product="hypothetical protein"
/besthit="qcoverage 100 , hcoverage 100 , similarity 100
, identity 100 , evaluate 4.97e-115 , alnlength 166 ,
Bacteria , Proteobacteria , WP_182364992.1 MULTISPECIES:
hypothetical protein [Wolbachia]"
gene complement(3496..4284)
/locus_tag="wEsol_00204"
CDS complement(3496..4284)
/locus_tag="wEsol_00204"
/codon_start=1
/transl_table=11
/pfam="AAA_25"
/fullproduct="qcoverage 100 , hcoverage 100 , similarity
99.2 , identity 98.5 , evaluate 8.75e-186 , alnlength 262 ,

```

```

Bacteria , Proteobacteria , WP_226079816.1 helicase RepA
family protein [Wolbachia endosymbiont of Tribolium
confusum]"
/translation="MLQNFLTIGQKIPFFSVKEYLDDQSPIPEDIISPRILTKRGLLV
FGGPPKIGKSDFLISWLVMYAAGRSFLGMTPNRPLKIFYMQTEIEYEMKERLQQLDN
ELLNVAANNLIITPKVHLSFNRDEISEIKEIVNERFKPDVLAIDPLRNIFSSEYGNEN
DNSAMLFFLQKTLEKLRSAINPDACIVLTHHTKKLSKKMLEEDPFQGLSGAGSLRGFY
STGMVMFAHDEESSARQIVFELRNGERVQNKLVDKINGHWQLME"
/product="helicase RepA family protein"
/besthit="qcoverage 100 , hcoverage 100 , similarity 99.2
, identity 98.5 , evalue 8.75e-186 , alnlength 262 ,
Bacteria , Proteobacteria , WP_226079816.1 helicase RepA
family protein [Wolbachia endosymbiont of Tribolium
confusum]"
gene complement(4296..5117)
/locus_tag="wEsol_00205"
CDS complement(4296..5117)
/locus_tag="wEsol_00205"
/codon_start=1
/transl_table=11
/pfam="AAA_24"
/fullproduct="qcoverage 100 , hcoverage 100 , similarity
100 , identity 100 , evalue 7.01e-202 , alnlength 273 ,
Bacteria , Proteobacteria , WP_213863537.1 AAA family
ATPase [Wolbachia endosymbiont of Ceratitis capitata]"
/translation="MKIMNSNERLKVQTGIKMVIFGPYGIGKTSLLKTINEPTLCLDF
EAGLLAVQDWQGDSVSIRTWNEARDIACLIGGNPALKSDSAYSQRHYEHVSSSKYKEL
ASEFLKYRCVFIDSITVASRLCLLWSKMQPEAFSERSGQDMRAAYGLLAQEMMAWLN
QFQHIPNKDIITVGTGLGQYLDDFNRSTWLPQCEGAKTASEIPGIVDEVISMVGIKKDD
GTEVRSEFVCQTINSWGYPAKDRSGCLNMVEEPHLGKLLTKIKTKAFAIQPITHNI"
/product="AAA family ATPase"
/besthit="qcoverage 100 , hcoverage 100 , similarity 100
, identity 100 , evalue 7.01e-202 , alnlength 273 ,
Bacteria , Proteobacteria , WP_213863537.1 AAA family
ATPase [Wolbachia endosymbiont of Ceratitis capitata]"
gene complement(5211..5705)
/locus_tag="wEsol_00206"
CDS complement(5211..5705)
/locus_tag="wEsol_00206"
/codon_start=1
/transl_table=11
/fullproduct="qcoverage 100 , hcoverage 100 , similarity
100 , identity 100 , evalue 1.32e-109 , alnlength 164 ,
Bacteria , Proteobacteria , WP_019236463.1 MULTISPECIES:
sigma-70 family RNA polymerase sigma factor [Wolbachia]"
/cog="RpoE COG1595 182 DNA-directed RNA polymerase
specialized sigma subunit, sigma24 homolog"
/pfam="Sigma70_r2 TrmB"
/tigr="TIGR02937 sigma70-ECF 165 RNA polymerase sigma
factor, sigma-70 family"
/product="sigma-70 family RNA polymerase sigma factor"
/translation="MKNSYQGIDSTIVKHVRFQASRLKSKSCFINESLEDIEQELFCQ
VWQYLNQHDEKRSSFSTFVARLANYCARNMLRNQLCLKRNITFDDINDDIPDHRNSEI
EAIIRTDINNIISTLSEKDSNLCQLLKVFTITEVSVITKIPKTTIYRTLIRDKFSV
LEKL"
/besthit="qcoverage 100 , hcoverage 100 , similarity 100
, identity 100 , evalue 1.32e-109 , alnlength 164 ,
Bacteria , Proteobacteria , WP_019236463.1 MULTISPECIES:
sigma-70 family RNA polymerase sigma factor [Wolbachia]"
gene 6397..6684

```

CDS /locus\_tag="wEsol\_00207"  
 6397..6684  
 /locus\_tag="wEsol\_00207"  
 /codon\_start=1  
 /transl\_table=11  
 /product="hypothetical protein"  
 /translation="MCFLSFHNWLNLSLKHEFTAVYFEEVRRHLGTDAAHCYGGFLAVL  
 SAWCEEHHVPYKGV PVKTIKRFIAGKGNASKSEVIEAVKKKGFFTSRRQRI"  
 /besthit="qcoverage 91.5789473684211 , hcoverage  
 76.9911504424779 , similarity 98.9 , identity 95.4 ,  
 eval 7.59e-55 , alnlength 87 , Bacteria ,  
 Proteobacteria , ONI57848.1 holliday junction resolvasome  
 [Wolbachia pipientis wVitA]"  
 gene 6855..7622  
 CDS /locus\_tag="wEsol\_00208"  
 6855..7622  
 /locus\_tag="wEsol\_00208"  
 /codon\_start=1  
 /transl\_table=11  
 /product="hypothetical protein"  
 /pfam="ParBc Pfam-B\_13714 Pfam-B\_3908"  
 /translation="MNLAIHYPTQNLVEYERNPRKNDDVVNRMCASIREFGFRIPV  
 AKSDGTVVDGHLRLKAARKLGMESIPVVLSDNLNEPQTKAFRLLANQSANWAKWDDDL  
 LKVEIQELEDLQFDLKMTGFELEKVQHFLDDLDGEKEDFSDLVGDEKRVEITKPGDLW  
 ILGDHRIYCGDSSSVESYKVLDDDKMADITVCDPPYNVDYGSQEREDKKILNDNQGE  
 KYELFLYDICSQYFSIYERCNLHLHIIIRIFNVAKSI"  
 /besthit="qcoverage 89.8039215686275 , hcoverage  
 68.3582089552239 , similarity 99.1 , identity 98.3 ,  
 eval 9.06e-160 , alnlength 229 , Eukaryota , Arthropoda  
 , KAG8301083.1 hypothetical protein J6590\_060860  
 [Homalodisca vitripennis]"

# ORIGIN

```

1  ctgtttcttc atttcttaaa taggtgcgta aagtgcgatc agccaaaccg tttgctttaa
61  caattgctcc ataaaataat gcgttctgtc ttacagattc tcctattgat ttaaaaattg
121 tcagtttagc tgtatcttcc acagaccaa aagcgtatga acacctaaca ccattaacaa
181 gagcagatgt acctctaata gcatcacgtg cttgctcaac agtcgatata ggtttttcac
241 tttttggctt tctcatatgg tgggcagtaa ttattgatgc tccagtgcta cctgctaaat
301 cagataataa agacatcaaa taatcgccca cggctgggtc agtatttaaa tcagcatgca
361 caaatgatgc aagtggatca aatacgatta attttaagtc ttttatttta ttaagttggt
421 ttgttatcga ttcaaattca ggagaagtct ctataacttt acctgaaaca ctctttatga
481 ttgtaagtga tccactaaca tttggtaatg gtacaataaa gagcctatcc ttatatatta
541 atctttcgca ttgcgaatca agacgctcta aacgacgatg tatttcactc atatcatctt
601 ctgctgagaa aattaccaca gatccatgtt cagtaactaa aggacaaaaa ccacatggct
661 gatcttttct actcgcaact ttcagtgcta aatcaagcag aagcatacct ttaccagtat
721 ctcccatcgc agctagaata gatgttactc ctaaaggaaa taacccttca acaagaaact
781 tttgctctgg tactggacct ataaaacgtt ctacgctcca ttcttgaata ttaagcaatt
841 gcttaacgat gatttttttc gagttatatt caatgaattc aggaatatcc atcttttctt
901 ctataaccatc agctgaatcc catccttttg gtttattgtc aggtatttca agaagagtaa
961 gtgataaaac accaagaaaa gtaagctttt tcacaacttt ctcagcatat tgtttacctg
1021 gttcatcatt gtctggccaa ataataacat gcttaccctt aagtgggtgac cagtctgttt
1081 tttctattgg tgcatttgct cctaacattg cagttgtggc agtcatacct tgctctatca
1141 gagcatctgc aactttttca ctttcaacta aaatcacctt atcagatttc atgataacctg
1201 gaatattata taaaggcctg gtctctggtg gagtaaaact agaccttttt acatcaaaag
1261 gaagatatct ttttcctgaa tcagtgttat aacgataaac tgtagcaatc acttgatcac
1321 tttcatcgta atagttccat gatgccgttg gttgccccag agtgttatatt ttttccgaat
1381 aaccaatcca cttagcaata tcttctatcg tgtcagtaaa ttgatttttt ccagtaacag
1441 cagcccaaag atcaaaaata tctcctcctt ctccggtaga aaaatcgtgc cataatccgg
1501 ctttactgcc agttaactca actatcatac ttttcccttt actgccttgc agatcaccta
1561 catagaactt atcaccacga aaagttcctc ttggcagtaa ataagaaaga catgacctta
1621 tatttgatag gagttgagtt cttaactgtt ctttcttccc taataattta taatgtccat

```

|      |            |             |             |             |             |            |
|------|------------|-------------|-------------|-------------|-------------|------------|
| 1681 | ttctttgtga | acaataaata  | tccataccta  | cctgaagaat  | ttttatgttc  | tagctataac |
| 1741 | gtagcaggtt | ttccaacatc  | cattaatctt  | attgatgaat  | tttggttggt  | tagatctacc |
| 1801 | gtttctaagt | tcataatact  | cttgtaagat  | atttgtagct  | ttattggggt  | gaaatattac |
| 1861 | tattccagat | gtataaaaac  | ttcttaaagc  | gtagcacca   | acgagagctt  | gaaatggatt |
| 1921 | cttttccaat | gtagaggtag  | atactttttt  | ggtgtgattt  | gtgatgatta  | ttccagccat |
| 1981 | agggttaatc | ttagagcgta  | gtttttctat  | tgcattgctgc | agaccatagt  | taacggaatt |
| 2041 | ataaggagaa | tcaatcacia  | ctaagtcaaa  | cttttcagct  | atcatactct  | ttattttttc |
| 2101 | tataccttct | tcatttaagg  | tcaaattcat  | cttgttcgt   | acaactaagt  | tttctgttgc |
| 2161 | taaatgagga | agtttggtga  | gttggtgtat  | acgctctcta  | atgtaatcat  | attccatttc |
| 2221 | attttgtaga | tagaataatt  | ttagcggctt  | tgcaggcttc  | atgccaagaa  | atgatcttcc |
| 2281 | tgctgccaga | tgtactaata  | gagaaaggag  | aaaatgactt  | ttgccaatct  | ttggagtacc |
| 2341 | acctatgacc | aaaagaccac  | ctgggtgtca  | aattcttggt  | cctattatat  | cttttggcat |
| 2401 | tggtgattta | tcgtttaagt  | aatgggtttac | agaaaatgct  | ttttcttcgt  | tttggttttc |
| 2461 | ttgtaatatg | gaacttcttt  | catctttacc  | gttcaaccat  | gtttcagcag  | aatctatatt |
| 2521 | acctttaact | aaagtccaaa  | ggtctattat  | atttcctttc  | ttttcttcga  | tcagggttga |
| 2581 | ccaatttcct | gcattttctc  | cttccatttc  | aactattatc  | ttattttccat | ttctactgcc |
| 2641 | aatatagaat | ttatttttgt  | aagatttgcc  | ttcaggtaac  | aaataagata  | aacaatcttt |
| 2701 | gatattatta | attaataatg  | attttatatt  | taaagcattt  | ttagatgaaa  | aatccataaa |
| 2761 | attctccttg | tttattccaa  | atttgttcaa  | catatttttt  | agacgtttta  | agtcaagatt |
| 2821 | agccagctca | caaacagttt  | caaaagatcg  | tgagcgaatc  | cattgacaag  | cctctttttt |
| 2881 | aagtttaggg | ttttttcctg  | ctgcatcctg  | aatagctcta  | gtaataacag  | cagcccacaa |
| 2941 | ctttccttcg | tcataactca  | aaatggcaac  | caatcatctt  | gaaaactttt  | ttgtaattct |
| 3001 | ggagtaataa | ctgtagtaat  | cctattttcta | tctccgtacg  | tattattagt  | ttcaacgcct |
| 3061 | actttcgctg | taaactctaa  | atcggtgaaa  | tcagctatag  | agttgatttt  | tctagcagta |
| 3121 | actgctttct | ctgaagtgtc  | atttgcatga  | atattttctg  | atgattccaa  | aatactacgc |
| 3181 | agcatcgaac | gtccagattc  | tccccagatg  | tcttcttcac  | cttctgcttt  | gccatttttg |
| 3241 | atacctataa | tctgaaaaat  | cttgcgtttt  | gcataatggc  | cttcagtgc   | agtaaatcca |
| 3301 | gtgttttaaa | agatgctgcc  | agtagtgtag  | tttttagtga  | accaattttc  | ataacctcca |
| 3361 | ggcttttatt | ccattttttac | cttgactatt  | gtacctttcg  | gtattaaact  | gctctgtagt |
| 3421 | tttgcatatt | taaaatcagt  | taaaaaatct  | tgtagcatac  | gctctcctat  | aagttgattt |
| 3481 | taaagtgaag | attagctatt  | ccattagctg  | ccaatgacca  | tttatcttat  | cgacaagttt |
| 3541 | attttgccag | cgttcacccat | tgcgaagctc  | aaatactatc  | tggcgtgcac  | tactttcttc |
| 3601 | atcatgagca | aacatcacca  | taccagtact  | gtaaaatcca  | cgtaaagatc  | cagcaccact |
| 3661 | taggccttga | aatggatctt  | cttcgagcat  | cttttttgat  | aatttttttg  | tatgatgagt |
| 3721 | aagtacaata | caagcatctg  | gattgatagc  | actgcgtagc  | ttttcaagag  | tcttttgcag |
| 3781 | aaaaaacagc | atagcactat  | tgtcattttc  | atttccatat  | tcactgctaa  | agatgttacg |
| 3841 | taatggatct | atggccaaaa  | catcagggtt  | aaagcgttca  | tttacaatct  | ccttaatttc |
| 3901 | acttattttc | tcacgattaa  | atgataagtg  | cactttttgg  | gtaatgatta  | agttgttagc |
| 3961 | agctacattc | aaaagttcat  | tatcaagttg  | ttgcaaacgt  | tctttcatat  | attcatattc |
| 4021 | aatttcaggt | tgcattgtag  | agattttcaa  | aggtctattt  | ggtgtcatac  | caagaaatga |
| 4081 | tctaccagca | gccatgtaaa  | caagccaaga  | gatcaaaaag  | tcgcttttgc  | caatcttagg |
| 4141 | agggccacca | aatactaaca  | aacctctttt  | agtcagaatt  | cttggtgaga  | ttatatcctc |
| 4201 | tggtattggc | gattgatcat  | ccaagtattc  | tttcacactg  | aaaaaaggaa  | ttttttgacc |
| 4261 | aatagttaaa | aagttttgta  | gcataataa   | acctcctata  | tggtgtgcgt  | gatagggtga |
| 4321 | attgcaaaa  | cttttggttt  | aatctttgta  | agaagttttc  | ctagatgcgg  | ttcttcaacc |
| 4381 | atattcaggc | atccacttcg  | atcttttagc  | ggatatcccc  | aagaattaat  | tgtctgacag |
| 4441 | acaaatgaac | gaacctctgt  | accatcatct  | ttcttgattc  | caaccatact  | gattacttcg |
| 4501 | tcaactatcc | caggaatttc  | acttgagtt   | ttagctcctt  | cacattgagg  | tagccaagtt |
| 4561 | gagcgattga | aatcatcaag  | gtattgccc   | agagttccaa  | ctgtaatgat  | gtctttattt |
| 4621 | ggaatatggt | gaaactgatt  | gagccaagcc  | atcatctctt  | gagcaagtaa  | cccgtgaagc |
| 4681 | gctctcatat | cttggtttcc  | tgatctttca  | gaaaaagctt  | caggttgcat  | ttttgaccat |
| 4741 | aaaagacata | aacgcgaggc  | tactgtaata  | ctatcgataa  | aaacacatcg  | atacttgaga |
| 4801 | aactccgaag | caagctcttt  | gtattttact  | gatacatgct  | catagtgtct  | ttggctatat |
| 4861 | gctgagtcag | attttaacgc  | aggattagga  | ccacctatga  | gacatgcaat  | atctcttgcc |
| 4921 | tcattccaag | tacgaatact  | tacagaatcc  | ccttgccaat  | cttgaacagc  | aagtaaacct |
| 4981 | gcctcaaaat | caagacaaa   | tggttggttc  | tttatggtct  | ttaagagact  | agttttacct |
| 5041 | ataccataag | gaccaaaag   | gaccattttt  | atacctgttt  | gaacttttag  | ccgttcattg |
| 5101 | ctgttcatta | ttttcatatt  | tctcccagta  | cctaaatata  | tatgtacgat  | gacctaggca |
| 5161 | attcgtccgc | aatttgcaaa  | aaaaaatttt  | gagcaaatat  | aatcgagagc  | ttataacttc |
| 5221 | tctaaaactg | agaatttatc  | gcgtattcgt  | tctagtgtgc  | gatagatagt  | tgtctttggt |

```

5281 attttggtta ttacagaaac ttcagtaata gtaaatacct taagtaattg acataaatta
5341 ctatcttttt cagacaaaagt tgaaattata ttattttatat cagtgcgaat tatcgcttcg
5401 atttccgagt tcctatgatc tggaatatcg tcgtttatat catcaaaagt tatattacgt
5461 tttagacata actgattgcg taacatatcg cgagcacaat aattagctaa tctagcaacg
5521 aaagtactaa aactacttct tttctcatcg tgctgggttaa gatattgcca aacctgacaa
5581 aaaagctctt gttctatatc ttcgagactt tcgttaataa aacagctttt ggatttaagg
5641 cgcgaaagctt gaaatctcac atgtttaaca attgtagaat cgattccttg ataagaattc
5701 ttcataaaaa ctccaaaagt ttcatgaata gagattttta ccaagacttt gtatgactaa
5761 tttattataa aaaagtagta ataatttttt tatctaaaag aataaaatct ttaaaaatta
5821 aaataagatt taaacgtttt gatacactac tgaagctact ttttcatagg taaaaaacta
5881 ccaatttcgt acctaatttc tgagttacta attagtattt cagaaagcag tgatcggtta
5941 gttattgata atattgtctt ttttatgttc tattcctaaa agccgtttct aaagttaagt
6001 ggctaaaatc ggccagtaaa gaggggttaa ggattactga agtcttatat atattatata
6061 tatattttaa tacaggtaaa atataatata taataatata aatattggcg taatataagt
6121 tatgtaaaat agttattaag ataagtaaag atgaaaaaaa ctcaaattggc aggatatgaa
6181 atttttttta attttttttc aaaattgctg acgaatttgc gagtcacgtg acatatatat
6241 tatacagggc attgaacttt aattacacaa aggagttttt gtacgtcaat cttaacgcta
6301 gatctcggca agcaaacagg ctgggcaatt cttacagatg gagtaattga aagtgggaagc
6361 aaaagttttc atggtagccg tttcagtggg ggtggaatgt gttttttaag ttttcacaat
6421 tggcttaatt ctttgaaaca tgagttcact gcagtgtatt ttgaagaagt aagaagacat
6481 ctaggaactg atgcagcgca ttgttatggg ggttttttgg ctgttctatc tgcttggtgt
6541 gaagaacatc atgtgccgta caaagggtgt cctgtaaaga ctataaaacg ctttatagca
6601 ggcaaaggca acgcaagtaa gagtgaagtt attgaagctg taaagaaaaa aggttttttc
6661 acctcgagac gacaacgaat ctgatgcttt agcttaatgt tctatattag taaagatatt
6721 aatgtattaa aaataccata aaaagtgggt ctttccggct ataattggcg gtttggtggg
6781 gctgacccca ggccttttct agtgttagac atattttgaa tattaacttt ttaattatta
6841 agaattttaa ttatatgaat ttagcaatcc actactatcc tactcaaaat ctggtcgaat
6901 atgagcgtaa tcctcgtaaa aatgacgatg tggccaacag aatgtgtgct tcaatcaggg
6961 aattcggctt tcgtattcca atagttgcaa aaagcgatgg aactgtgggt gatggccatt
7021 taagacttaa agcagcaaga aaacttggtg tggagagtat tccagtgggt ttaagtgata
7081 atttaaatga accacaaact aaagcttttc gattactcgc aaatcaatca gctaattggg
7141 caaagtggga tgatgatctt ttaaagggtg aaattcaaga gttagaagat ttacagtttg
7201 atcttaaaat gacaggatth gaattggaaa aagttcaaca tttccttgat gacttagatg
7261 gtgaaaaaga agatttttct gacttggttg gtgatgaaaa aagggtagaa ataacaaaac
7321 caggatgatc ttggatttta ggtgatcatc gaatctattg tggatgatac tctgtagttg
7381 aatcatataa agtgctgtta gatgataaaa tggcagacat tactgtttgt gatcctccat
7441 ataacgttga ctatggtagt agccaagaga gagaagataa aaaaatatta aacgataatc
7501 aagggtgaaa gtatgagctt tttctctatg acatctgttc ccaatatttt agcatatacg
7561 aaagggtgcaa tttacatctg catatcatca tcagaatttt caacgttgca aaaagcattt
7621 gaagaggcag gagggaaatg gtcaacattt atcatttggg caaagaatca ttttacacta
7681 ggaagatctg attatcaaag acaatacgaa gcaatgctct atgga

```

//

```

LOCUS      JAQZAU010000031          11993 bp    dna        linear    ENV 17-MAR-2023
DEFINITION MAG: Wolbachia pipientis isolate wEsol contig_2547, whole genome
            shotgun sequence.
ACCESSION  JAQZAU010000031  JAQZAU010000000
VERSION    JAQZAU010000031.1
DBLINK     BioProject: PRJNA929258
            BioSample: SAMN33142973
KEYWORDS   WGS; ENV; Metagenome Assembled Genome; MAG.
SOURCE     Wolbachia pipientis (insect metagenome)
ORGANISM   Wolbachia pipientis
            Bacteria; Pseudomonadota; Alphaproteobacteria; Rickettsiales;
            Anaplasmataceae; Wolbachieae; Wolbachia.
REFERENCE  1  (bases 1 to 11993)
AUTHORS    Fiutek,N., Couger,B.M., Roy,S., de la Torre,J.R. and Connor,E.F.
TITLE      Genomic assessment of the contribution of the Wolbachia
            endosymbiont of Eurosta solidaginis to gall-induction
JOURNAL    International Journal Molecular Sciences
REFERENCE  2  (bases 1 to 11993)

```

AUTHORS Fiutek,N., Couger,B.M., Roy,S., de la Torre,J.R. and Connor,E.F.  
 TITLE Direct Submission  
 JOURNAL Submitted (10-FEB-2023) Biology, San Francisco State University,  
 1600 Holloway Ave, San Francisco, CA 94132, USA  
 COMMENT ##Genome-Assembly-Data-START##  
 Assembly Date :: JUN-2019  
 Assembly Method :: FLYE v. 06-2019  
 Genome Representation :: Full  
 Expected Final Version :: Yes  
 Genome Coverage :: 100.0x  
 Sequencing Technology :: Illumina HiSeq; PacBio Sequel  
 ##Genome-Assembly-Data-END##  
 FEATURES Location/Qualifiers  
 source 1..11993  
 /organism="Wolbachia pipientis"  
 /mol\_type="genomic DNA"  
 /submitter\_seqid="contig\_2547"  
 /isolate="wEsol"  
 /isolation\_source="galls on Solidago altissima"  
 /host="Eurosta solidaginis MN-2018-EFC"  
 /db\_xref="taxon:955"  
 /environmental\_sample  
 /country="USA: Cowling Arboretum, Carleton College,  
 Northfield, MN"  
 /lat\_lon="44.48 N 93.13 W"  
 /altitude="280 m"  
 /collection\_date="2018-11"  
 /metagenome\_source="insect metagenome"  
 /note="metagenomic"  
 gene complement(<1..282)  
 /locus\_tag="wEsol\_00209"  
 CDS complement(<1..282)  
 /locus\_tag="wEsol\_00209"  
 /codon\_start=1  
 /transl\_table=11  
 /fullproduct="qcoverage 100 , hcoverage 84.6846846846847  
 , similarity 98.9 , identity 98.9 , evaluate 5.85e-56 ,  
 alnlength 94 , Bacteria , Proteobacteria , WP\_213863527.1  
 GPW/gp25 family protein [Wolbachia endosymbiont of  
 Ceratitis capitata]"  
 /cog="COG3628 COG3628 116 Phage baseplate assembly  
 protein W"  
 /pfam="DUF2634 GPW\_gp25"  
 /product="GPW/gp25 family protein"  
 /translation="MKGMDSKTGKELEGIEHLKQSIIDILTTPINSRVMRDYGSRLF  
 ELVDKPINRDLTLEIYSAVAEALQSWEERFKLEKVKMTEVKEGKVTLDL"  
 /besthit="qcoverage 100 , hcoverage 84.6846846846847 ,  
 similarity 98.9 , identity 98.9 , evaluate 5.85e-56 ,  
 alnlength 94 , Bacteria , Proteobacteria , WP\_213863527.1  
 GPW/gp25 family protein [Wolbachia endosymbiont of  
 Ceratitis capitata]"  
 gene complement(285..539)  
 /locus\_tag="wEsol\_00210"  
 CDS complement(285..539)  
 /locus\_tag="wEsol\_00210"  
 /codon\_start=1  
 /transl\_table=11  
 /product="hypothetical protein"  
 /pfam="PAAR\_motif DUF4150 Pfam-B\_14026 PAAR\_motif"  
 /translation="MNKSVVRVGDYCVEVTPHFCISGSNNVFVNGKPMCRQGSEFSEG

```

EVMVQGSKTTFANGFGAGRVDIVSCGFKVIKGSENVFAG"
/besthit="qcoverage 58.33333333333333 , hcoverage
58.33333333333333 , similarity 100 , identity 100 , evaluate
3.94e-28 , alnlength 49 , Bacteria , Proteobacteria ,
WP_174516944.1 hypothetical protein [Wolbachia
endosymbiont of Cardiocondyla obscurior]"
gene complement(540..698)
/locus_tag="wEsol_00211"
CDS complement(540..698)
/locus_tag="wEsol_00211"
/codon_start=1
/transl_table=11
/product="hypothetical protein"
/pfam="Pfam-B_2532"
/translation="MKFQDGTRLLYDKEKHHLEIEVVDKITLKAGESSIEMTKSEIKL
KADRINLN"
/cog="gpV COG4540 184 Phage P2 baseplate assembly protein
gpV"
/besthit="qcoverage 100 , hcoverage 33.7662337662338 ,
similarity 100 , identity 98.1 , evaluate 1.16e-24 ,
alnlength 52 , Bacteria , Proteobacteria , WP_065095149.1
MULTISPECIES: phage baseplate assembly protein V
[unclassified Wolbachia]"
gene complement(712..1023)
/locus_tag="wEsol_00212"
CDS complement(712..1023)
/locus_tag="wEsol_00212"
/codon_start=1
/transl_table=11
/fullproduct="qcoverage 100 , hcoverage 100 , similarity
100 , identity 100 , evaluate 1.60e-74 , alnlength 103 ,
Bacteria , Proteobacteria , WP_155968470.1 transposase
[Wolbachia pipientis]"
/cog="COG3335 COG3335 132 Transposase and inactivated
derivatives"
/pfam="DDE_3 DDE_1"
/product="transposase"
/translation="MTFKGGCDKEVFNTWLEKMLLPKLPHGTTIVMDNATFHKTPKTK
ELIDNARCRLLYLPTYSPDLNPIEHWCWNTIKSRLRPLMHKYTDLQLLVGNTIMEIYHS
F"
/besthit="qcoverage 100 , hcoverage 100 , similarity 100
, identity 100 , evaluate 1.60e-74 , alnlength 103 ,
Bacteria , Proteobacteria , WP_155968470.1 transposase
[Wolbachia pipientis]"
gene complement(1223..1570)
/locus_tag="wEsol_00213"
CDS complement(1223..1570)
/locus_tag="wEsol_00213"
/codon_start=1
/transl_table=11
/fullproduct="qcoverage 100 , hcoverage 100 , similarity
100 , identity 100 , evaluate 2.74e-74 , alnlength 115 ,
Bacteria;Eukaryota , Proteobacteria;Arthropoda ,
WP_155968342.1 MULTISPECIES: IS630 transposase-related
protein [Wolbachia]"
/cog="COG3415 COG3415 138 Transposase and inactivated
derivatives"
/pfam="HTH_Tnp_IS630 HTH_Tnp_1 HTH_23 HTH_28 HTH_29 HTH_7
CENP-B_N Pfam-B_14738 HTH_8 HTH_17 HTH_24 Pfam-B_2106"
/product="IS630 transposase-related protein"

```

```

/translation="MAYSVDLRERAVSMIEKGKSKVEVAELLEIGIATLYRWLRKKAA
GESLRPSKNGSFIRKIDPKILEEYVKKNPDHTLAEMKQNLGFGINSIWYRLKQLRITL
KKSYSISRASRR"
/besthit="qcoverage 100 , hcoverage 100 , similarity 100
, identity 100 , evalue 2.74e-74 , alnlength 115 ,
Bacteria;Eukaryota , Proteobacteria;Arthropoda ,
WP_155968342.1 MULTISPECIES: IS630 transposase-related
protein [Wolbachia]"
gene complement(1560..1925)
/locus_tag="wEsol_00214"
CDS complement(1560..1925)
/locus_tag="wEsol_00214"
/codon_start=1
/transl_table=11
/product="hypothetical protein"
/pfam="Phage_base_V"
/tigr="TIGR01644 phage_P2_V 192 phage baseplate assembly
protein V"
/translation="MLESNFAISELQKRLANIVRIGVVKEVDYEKAKVRVKIGELLTD
FLPWITSRAGEERSWLPPSINEQVVILSPLGELSLGVVLAGIYQQKYAAPENKKEINI
VLPKVNDKGIISYLSYNGV"
/cog="gpV COG4540 184 Phage P2 baseplate assembly protein
gpV"
/besthit="qcoverage 85.1239669421488 , hcoverage
66.8831168831169 , similarity 99.0 , identity 99.0 ,
evalue 2.06e-63 , alnlength 103 , Bacteria ,
Proteobacteria , WP_208571542.1 MULTISPECIES: phage
baseplate assembly protein V [Wolbachia]"
gene complement(1912..2385)
/locus_tag="wEsol_00215"
CDS complement(1912..2385)
/locus_tag="wEsol_00215"
/codon_start=1
/transl_table=11
/pfam="Pfam-B_4030"
/fullproduct="qcoverage 100 , hcoverage 100 , similarity
100 , identity 100 , evalue 1.06e-107 , alnlength 157 ,
Bacteria , Proteobacteria , WP_213863529.1 hypothetical
protein [Wolbachia endosymbiont of Ceratitidis capitata]"
/translation="MNFKDLHNAIFTTLKKEIPAIQTCEIYPSIRKELLAPALFVELV
SLESGKDPGTEELALKARFEARIVIDSTIENAAIIVRTLAAEVAKVVNKNWTWNKNVS
PGEFISAEIDGFRPELDAYLVMMVDWSHQLHLGKSIWTENKIKPHTIIIEENVRE"
/product="hypothetical protein"
/besthit="qcoverage 100 , hcoverage 100 , similarity 100
, identity 100 , evalue 1.06e-107 , alnlength 157 ,
Bacteria , Proteobacteria , WP_213863529.1 hypothetical
protein [Wolbachia endosymbiont of Ceratitidis capitata]"
gene complement(2382..2894)
/locus_tag="wEsol_00216"
CDS complement(2382..2894)
/locus_tag="wEsol_00216"
/codon_start=1
/transl_table=11
/pfam="Pfam-B_14565 Pfam-B_12992 Minor_tail_Z"
/fullproduct="qcoverage 100 , hcoverage 100 , similarity
100 , identity 100 , evalue 9.88e-108 , alnlength 170 ,
Bacteria , Proteobacteria , WP_213863530.1 phage tail
protein [Wolbachia endosymbiont of Ceratitidis capitata]"
/translation="MFDIKISNNINEIVYNIDEKEQKVLAAIKALNRTALWLKAQAA
KEISEEKKIKLSLIRKRLRIFKAKTSRLEVLIRANLYDIRASTIGKIQKTRRGSKVGK

```

```

HEFIGGFAAVMPKGNsgmFkREGRAALPIKEVKLSLEPEASRIIGNLVNyeVEEVFEK
FFERDITRNI"
/product="phage tail protein"
/besthit="qcoverage 100 , hcoverage 100 , similarity 100
, identity 100 , evalue 9.88e-108 , alnlength 170 ,
Bacteria , Proteobacteria , WP_213863530.1 phage tail
protein [Wolbachia endosymbiont of Ceratitidis capitata]"
gene complement(2887..3198)
/locus_tag="wEsol_00217"
CDS complement(2887..3198)
/locus_tag="wEsol_00217"
/codon_start=1
/transl_table=11
/fullproduct="qcoverage 100 , hcoverage 100 , similarity
100 , identity 100 , evalue 5.85e-68 , alnlength 103 ,
Bacteria , Proteobacteria , WP_141457308.1 MULTISPECIES:
hypothetical protein [unclassified Wolbachia]"
/translation="MNIGKLLLEDcFEHLGVEATYCNKNKEGIRRIKVLIKRPETTYSL
GADGALTQQIASIEIRDQDVTsFSIGDYIKIEKRFYKIFEPPLKDSSEIWKIEAIEN
V"
/product="hypothetical protein"
/besthit="qcoverage 100 , hcoverage 100 , similarity 100
, identity 100 , evalue 5.85e-68 , alnlength 103 ,
Bacteria , Proteobacteria , WP_141457308.1 MULTISPECIES:
hypothetical protein [unclassified Wolbachia]"
gene complement(3198..4202)
/locus_tag="wEsol_00218"
CDS complement(3198..4202)
/locus_tag="wEsol_00218"
/codon_start=1
/transl_table=11
/pfam="Phage_cap_E"
/fullproduct="qcoverage 100 , hcoverage 100 , similarity
100 , identity 100 , evalue 5.18e-246 , alnlength 334 ,
Bacteria , Proteobacteria , WP_213863531.1 major capsid
protein [Wolbachia endosymbiont of Ceratitidis capitata]"
/translation="MQNPFTNTAFsMTALTNAMNIlPINYGRVENLNLfPSRSVRFRH
ITIEEHNGVLSLLPTQVPGAPATVGKRGKRKVRTFTIPHiPHDDVVLPEEVQGIRAFG
SESELKALADVITDHLQLMRNKHAITLEHLRMGALKGIILDADGSGLLNLYNEFEITP
KVVNFALGTATTDVkrKCLEVLRHIEDNLsGEYMTGIHALVSPEFFDALTSKAVKEA
YERWQEGAAALRNDMRSGFTFCGITFEEYRGQATDPEGTVRRFIEKDTGHCfPVGTASt
FTTYFAPADFNETVNTLGQPLYAKQEPrrFRDrgTDLHTQSNPLPMChRPgVLVKISS
"
/product="major capsid protein"
/besthit="qcoverage 100 , hcoverage 100 , similarity 100
, identity 100 , evalue 5.18e-246 , alnlength 334 ,
Bacteria , Proteobacteria , WP_213863531.1 major capsid
protein [Wolbachia endosymbiont of Ceratitidis capitata]"
gene complement(4228..4596)
/locus_tag="wEsol_00219"
CDS complement(4228..4596)
/locus_tag="wEsol_00219"
/codon_start=1
/transl_table=11
/pfam="HDPD"
/fullproduct="qcoverage 100 , hcoverage 100 , similarity
100 , identity 100 , evalue 1.95e-75 , alnlength 122 ,
Bacteria , Proteobacteria , WP_077188124.1 MULTISPECIES:
head decoration protein [Wolbachia]"
/translation="MSCIIEQNnLGdLLKYeASSLYSRDQITVAKGQNLKLGTVVGSd

```

```

KDNMIKIINPTATDGTQTAIGAIVSDVNATENAKAVIITRIAMLADHAIVWPTGITEE
QKAAAIKQLEGRGIIVRKGV"
/product="head decoration protein"
/besthit="qcoverage 100 , hcoverage 100 , similarity 100
, identity 100 , evalue 1.95e-75 , alnlength 122 ,
Bacteria , Proteobacteria , WP_077188124.1 MULTISPECIES:
head decoration protein [Wolbachia]"
gene complement(4674..5720)
/locus_tag="wEsol_00220"
CDS complement(4674..5720)
/locus_tag="wEsol_00220"
/codon_start=1
/transl_table=11
/pfam="CLP_protease Peptidase_S49"
/fullproduct="qcoverage 100 , hcoverage 100 , similarity
100 , identity 100 , evalue 3.57e-235 , alnlength 348 ,
Bacteria , Proteobacteria , WP_213863532.1 S49 family
peptidase [Wolbachia endosymbiont of Ceratitis capitata]"
/translation="MKQQWLNRCVMVEPRSFELLSLQTGKQPIFKNIKHAVRNSERGI
IPIHGILTKKPGAFDEMLGMTSYEQIEEQITQALADSSIETIILEIDSPGGEVNGIFD
LADFIYESRAKKRIIAIANDDAYSAAAYAIASSAEKVFSVRTSGVGSIGVIA SHIDQSG
FNEKCGIKYTTVFAGSRKNDLNPHEPMTSESLESLSLQKEVDRLYEMFVQLIARNRGLSI
EKIRSTEAGLYFGERAIEIGLADGITILSSINKNRSITMNEQTTTDLTDNLTKYRTE
VLELIRLCNLSRMPEKIEEFIEQGVSI EQAREVLMELLAERTKKTEILSAIPQNSGEE
LMMEVARTRAQSSI"
/product="S49 family peptidase"
/besthit="qcoverage 100 , hcoverage 100 , similarity 100
, identity 100 , evalue 3.57e-235 , alnlength 348 ,
Bacteria , Proteobacteria , WP_213863532.1 S49 family
peptidase [Wolbachia endosymbiont of Ceratitis capitata]"
gene complement(5717..7135)
/locus_tag="wEsol_00221"
CDS complement(5717..7135)
/locus_tag="wEsol_00221"
/codon_start=1
/transl_table=11
/fullproduct="qcoverage 100 , hcoverage 100 , similarity
100 , identity 100 , evalue 0.0 , alnlength 472 ,
Bacteria , Proteobacteria , WP_213863533.1 phage portal
protein [Wolbachia endosymbiont of Ceratitis capitata]"
/cog="COG5511 COG5511 492 Bacteriophage capsid protein"
/pfam="Phage_portal_2"
/tigr="TIGR01539 portal_lambda 457 phage portal protein,
lambda family"
/product="phage portal protein"
/translation="MMLKNFKQLFSKPKIKSSAWDAAGSGRRVMYWQGETGSINLLS
QSLETLRSRSDMVRKNPYAANIIDTIVSNSIGTGIKPQSKARDGEFRKKVQELWLRW
TDEADSCGISDFYGLQALVCRSMIEGGEFCFVRLRTRKLED RFSVPLQLQVLESEHLDN
KTNQTLGNGNVIRNGIEFNKLGQREAYYLFREHPGEGSFGESVRVPANDVLHIYRPLR
PGQIRGEPWLSSILLKLYELDQYDDAELVRKKTAAMFAGFITRLDPEANILGEGEANE
QGVALSGLEPGTMQLLDPGEDIKFSEPSDVGGSYEAFIRQQLRAIAIGTGITYEQLTG
DLTG VNYSSIRAGLIEFRRCAMLQHNVIVFQFCRPIWNRWLELAVLCGELS IDEKVV
KAAKEEVKWIPQGFDDWDPLKDQQAQQMAVRNGFKSRSEVVSEMGYDVEEIDQEIAED
QRRASELGLSFDSEVTANQEVI"
/besthit="qcoverage 100 , hcoverage 100 , similarity 100
, identity 100 , evalue 0.0 , alnlength 472 , Bacteria ,
Proteobacteria , WP_213863533.1 phage portal protein
[Wolbachia endosymbiont of Ceratitis capitata]"
gene complement(7132..7836)
/locus_tag="wEsol_00222"

```

CDS complement(7132..7836)  
 /locus\_tag="wEsol\_00222"  
 /codon\_start=1  
 /transl\_table=11  
 /fullproduct="qcoverage 100 , hcoverage 100 , similarity 100 , identity 100 , evalue 1.07e-172 , alnlength 234 , Bacteria , Proteobacteria , WP\_213863534.1 glycoside hydrolase family 25 protein [Wolbachia endosymbiont of Ceratitis capitata]"  
 /cog="Acm COG3757 269 Lysozyme M1 (1,4-beta-N-acetylmuramidase)"  
 /pfam="Glyco\_hydro\_25"  
 /product="glycoside hydrolase family 25 protein"  
 /translation="MRENFLRKVVKEEYSEFLEQLKTFIKLWENRESPVNGIIDLSHW QENVNFKLDKENGIVGVHKATQGLKHVDSKYAKRRKKAEEEGLLWGAYHFGTEGNGK NQADHFLKTVGESKNTILALDIEENKSGKNIAVKQAEEFVKRVEEVTGRPLIYGSSY FLKDFATPTLTCKPLWIASWRKELTLPKGWNDWILWQYTDGKTNPPEVEGIGKCDR NKFNGTLKELREFWLV"  
 /besthit="qcoverage 100 , hcoverage 100 , similarity 100 , identity 100 , evalue 1.07e-172 , alnlength 234 , Bacteria , Proteobacteria , WP\_213863534.1 glycoside hydrolase family 25 protein [Wolbachia endosymbiont of Ceratitis capitata]"

gene complement(7833..8057)  
 /locus\_tag="wEsol\_00223"

CDS complement(7833..8057)  
 /locus\_tag="wEsol\_00223"  
 /codon\_start=1  
 /transl\_table=11  
 /pfam="gpW"  
 /fullproduct="qcoverage 100 , hcoverage 100 , similarity 100 , identity 98.6 , evalue 3.67e-42 , alnlength 74 , Bacteria , Proteobacteria , WP\_017531716.1 hypothetical protein [Wolbachia endosymbiont of Diaphorina citri]"  
 /translation="MYNEDYLIQVEEAIKKLQNGERVVSIAYGDHVVRYAEVQINDLL SLRQRIKGELKIAGMKPKRKIIIFATNKGVI"  
 /product="hypothetical protein"  
 /besthit="qcoverage 100 , hcoverage 100 , similarity 100 , identity 98.6 , evalue 3.67e-42 , alnlength 74 , Bacteria , Proteobacteria , WP\_017531716.1 hypothetical protein [Wolbachia endosymbiont of Diaphorina citri]"

gene complement(8061..9884)  
 /locus\_tag="wEsol\_00224"

CDS complement(8061..9884)  
 /locus\_tag="wEsol\_00224"  
 /codon\_start=1  
 /transl\_table=11  
 /fullproduct="qcoverage 100 , hcoverage 100 , similarity 99.3 , identity 99.3 , evalue 0.0 , alnlength 607 , Bacteria , Proteobacteria , WP\_012673198.1 MULTISPECIES: phage terminase large subunit family protein [Wolbachia]"  
 /cog="COG5525 COG5525 611 Phage terminase, large subunit GpA"  
 /pfam="Terminase\_GpA DUF3268"  
 /product="phage terminase large subunit family protein"  
 /translation="MIYATSFSEGLKPDPELVSEWANEYRVLAPTAASEPGKWRTERTPYLKEIMDSLSPSSPAEKVVFMKGAQIGGTEAGNNWIGYIIYQTPGPMLVVQPTVEM GKRWSKGRFAPLIESTPCLKSKVKDPRSRDSGNTVQSKEFPGGIVVITGANSSVGLRSM PVKYLFLDEIDAYPGDSGGEGDPVLLSIARTNTSARRKIFLVSTPTIHGISRIEKEFEATDKQYFFVPCPYCNYYQVLKWSQIKWENNDSTAHYVCTECSGKIENHQKTEMLER"

```

GEWRPTNRVKGEKKGFHLSSLYSPVGWYSWTQAVEDFLHAKASEQLLKVVINTTLGET
WVDKGEVPDWKQLFNRREFFPVGTVPREVVLTAGVDVQKDRLEVEVVAWGKSRESWS
IEYRVFEGDTGRGEVWGKLSELLNHHFIGENGLYEMISMMAVDAGYATQEVYNWVRGH
QGSGRVMAVKGVNKALVPLSSPSRVDITVGGQKLKRGIKLWPVGVSILKSELFQLLNV
LKDGEAPAGYCHFPFYAPFYFKQLTAEQLVSKVVKGYTKQEWQKVRERNEVLDCRIY
ARAASIALGIDRWPEKWSNLSEKPEKSKSKKIVKSKWISE"
/besthit="qcoverage 100 , hcoverage 100 , similarity 99.3
, identity 99.3 , evaluate 0.0 , alnlength 607 , Bacteria ,
Proteobacteria , WP_012673198.1 MULTISPECIES: phage
terminase large subunit family protein [Wolbachia]"
gene complement(9881..11365)
/locus_tag="wEsol_00225"
CDS complement(9881..11365)
/locus_tag="wEsol_00225"
/codon_start=1
/transl_table=11
/pfam="Ank_2 Ank_4 Pfam-B_1881 Ank_5 Pfam-B_10896 Ank
Ank_3 Ank_5 Ank_3 Ank Ank_4 Ank_2 Pfam-B_10896 Ank Ank_3
Ank_5 Ank_2 Pfam-B_11730 Ank_3 Ank Ank_4 Ank_2
Pfam-B_10896 Ank_5 Ank_4 Ank_5 Ank Ank_4 Ank_3 Ank_2
Ank_5 Pfam-B_1873 Ank Ank_3 Ank_5 Pfam-B_4408"
/fullproduct="qcoverage 99.7975708502024 , hcoverage
100.612244897959 , similarity 98.8 , identity 98.6 ,
evaluate 4.61e-297 , alnlength 493 , Bacteria ,
Proteobacteria , WP_114517457.1 ankyrin repeat
domain-containing protein [Wolbachia endosymbiont of
Cylisticus convexus]"
/translation="MADNLSLELIKCLINQPLDVNVRGLNGKTPHLCAIEFDELSMV
DLLLTCKKNINPFVEDNEGKTSLDYAKEGKKAIEILQALINHKYGSEQDSLHLAAMIGE
VNAVRYLIRKGIDVNRNALHHTPLHLASGIGHENIVKILVEEGNAEIDVFDARNQTP
MHYAVNNKKLEIVKLLKLKLGADVNSARMGQNSMKLSPVHIAVSNTNYDERDLCLDILK
CLIKEPNAQVNLQDYENKTPHYAERLKTIEVLLTREDIDPLIRDDNGKTPFDYAKPE
IKKALMSNKYGSEKNSLLHLAAQRGEIELVESILKEEIDIDIVNNKGLSPVYLAEEKG
HLHVVKLLKKGANYPVLHLAIKSNLELLKVLFTENGALLCRDTPVINFPTLHNKY
IAQREIADKRMKKHNNIICICITVSAVAMAAYIGLTATTISSAIIIFATTTGIFALIIA
LMISEMSKRYIEKEFQKKMFMELEECSSSTVNDVEIEPIMSRCRQ"
/product="ankyrin repeat domain-containing protein"
/besthit="qcoverage 99.7975708502024 , hcoverage
100.612244897959 , similarity 98.8 , identity 98.6 ,
evaluate 4.61e-297 , alnlength 493 , Bacteria ,
Proteobacteria , WP_114517457.1 ankyrin repeat
domain-containing protein [Wolbachia endosymbiont of
Cylisticus convexus]"
gene complement(11385..11870)
/locus_tag="wEsol_00226"
CDS complement(11385..11870)
/locus_tag="wEsol_00226"
/codon_start=1
/transl_table=11
/fullproduct="qcoverage 100 , hcoverage 100 , similarity
99.4 , identity 99.4 , evaluate 3.65e-101 , alnlength 161 ,
Bacteria , Proteobacteria , WP_077188119.1 hypothetical
protein [Wolbachia pipientis]"
/translation="MEKITQTEWAREIGVSKQYVYYLVKKGIVELEDGLISREQANEA
VAAIRDPSQPLRRKNPENENTNNLSTMLLKTRIKNEMERKLLLEAKAKAGIGELVAVE
EVKRDADFNVARVVRNLLNIPNRVSALLASLSDTEKIHKTLTTEEITNSLQELSNTKFO
I"
/product="hypothetical protein"
/besthit="qcoverage 100 , hcoverage 100 , similarity 99.4
, identity 99.4 , evaluate 3.65e-101 , alnlength 161 ,

```

```

Bacteria , Proteobacteria , WP_077188119.1 hypothetical
protein [Wolbachia pipientis]"
gene complement(11887..>11993)
/locus_tag="wEsol_00227"
CDS complement(11887..>11993)
/locus_tag="wEsol_00227"
/codon_start=1
/transl_table=11
/product="hypothetical protein"
/translation="FVDVTIKRWQIYTGRDAILAGTGKTFSEIQEENL"
/besthit="qcoverage 100 , hcoverage 8.43672456575682 ,
similarity 100 , identity 100 , evaluate 1.04e-13 ,
alnlength 34 , Bacteria , Proteobacteria , WP_208571699.1
DNA modification methylase [Wolbachia pipientis]"

```

# ORIGIN

```

1  ttctagatca agcgttactt ttccttcttt cacctctgtc atttttactt tttctagctt
61  aaatctttcc tcccaacttt gtagagcttc tgctactgct gaatagattt ccaaagttaa
121 atctctattt attggcttat ctactaattc aaatagtctt gacccataat ctctcctcat
181 tactctactg ttaataggag tggtcagtat atcaattatt gattgtttca gatgttctat
241 tccttctaata tcttttcctg ttttgagatc catccctttc attttttagc tgcaaacacg
301 ttttctactgc cttttattac tttaaaccce catgaaacta tatctcctac tcttcccgcg
361 ccaaaccatc ttgcaaacac tgtttttgat ccttgaacca ttacttctcc ttcactaaaa
421 ctttctcctt gtctgcacat tggcttacca ttacaaaaaa cattgttact accactaatg
481 caaaaatgcg gtgttacttc tacacaataa tctcctactc gtacaaccga tttattcatt
541 taattaagggt ttattctatc tgctttcagt tttatttcgc tcttcgtcat ctctatgctc
601 gattccccag ctttcagtggt tattttgtct actacttcaa tctctaaatg atgcttctct
661 ttatcatata acaatcttgt tccatcctga aacttcacac tatagtattt tctaaaatga
721 atgataaatt tccattatgg tattaccaac caaagttgtt aagtctgtat atttatgcat
781 taaagggtctg aggcgggcttt tgatgggtatt ccaacaatgc tctatagggg tcaaactctg
841 tgaatatggt ggtagataga gcaaacggca tctagcatta tctattaact cctttgtttt
901 gggagtttta tgggaatgtg cattgtccat aactattgta gtaccatgtg gcaatttagg
961 taataacatc ttctctaacc atgtattgaa tacctctttg tcacacccac ctttgaaagt
1021 cattggtgca ataaatctct ttccaatcca cccgcctatt atactgattc tctctcgttt
1081 tcttcctgga atatctgcat aaattttctt tctattgga gcacgtccat actctcggtg
1141 taacctatta tcaactcctg cttcatctat atataagatg ctggaatggg ctatttttga
1201 gatttttatcg gtaaactcgt gcctatcttc ttgattgctc tcttgatata gtgtaacttt
1261 tttttaaagt aattcttagc tgtttcagcc tataccaaat tgaatttatt ccaaactcaa
1321 gattttgttt catctctgcc agcgtatgat ctggattctt tttaacatat tcttcgagta
1381 tttttgggtc tatttttcga ataaagctgc cgtttttcga tggccttagg ctttcaccag
1441 cggctttctt tcttaaccag cggtagagag ttgctattcc tatctccaaa agctctgcca
1501 cctcaacctt tgacttccct ttttctatca tcgatactgc cttttccctt aaatccacac
1561 tatacgccat tataactcaa atagcttatt atacctttat catttacttt ggggaagtact
1621 atattttatt cttttttatt ctctggtgca gcatacttct gttgatatat tccagctagt
1681 actactccta atgataactc tcccaatggg gacaatatta ctacctgttc atttatgctt
1741 ggtggtagcc agcttctttc ctctcctgct ctagaagtta tccatggaag aaaatctggt
1801 aaaagttctc ctatcttcac tcttactttt gctttctcat aatctacttc ttttacaact
1861 cctattcgta caatgtttgc taactttctt tgcagctctg aaatagcaaa attactctct
1921 aacattttct tctattataa tcgtatgtgg cttaatctta ttttctgtcc atatcgattt
1981 acctaaatga agctgatgac tccaatcaac catccacacc aaatatgcat ctaattcggg
2041 tctaaatccg tcaatttctg cagagataaa ttctcctggg gaaacatttt ttatattcca
2101 tgtatttttg tttacaactt ttgccacctc agcagctaat gttctgacaa taatagctgc
2161 attttctatt gtgctatcaa tcacaattcg tgcttcaaat cttgctttca gtgctaattc
2221 ttctgttctt ggatcttttc ccgattctaa actcacaagc tctacaaata acgctggcgc
2281 taataattct ttccttatcg atggataaat ttcacaagtt tgaattgctg gtatttcttt
2341 cttcagcgta gtgaagattg cgttatgcaa atcttttaaaa ttcatatatt tcttgaataa
2401 tcacgttcaa agaacttttc aaacacttcc tcaacctcat aattaacaag attccctatt
2461 atccttgaag cctcaggttc gagtgacaat ttaacttctt ttattggcaa tgctgctctt
2521 ccttcacgtt taaacatacc gctatttctt tttggcataa ctgctgcaaa tcctcctata
2581 aactcatgct ttctactttt cgatcctctt cttgtttttt gtattttgac aattgtcgat
2641 gctctaattg cgtagagatt tgctctaatt aacacttcta atctgcttgt ttttgcttta

```

|      |             |             |             |             |             |             |
|------|-------------|-------------|-------------|-------------|-------------|-------------|
| 2701 | aaaattctta  | atctctttct  | tatcaaactt  | aattttatct  | tcttttcctc  | actgatttcc  |
| 2761 | ttagctgctt  | gcgcttttaa  | ccatagtgtt  | gttctattta  | gtgcttttat  | agctgccagt  |
| 2821 | tttactttct  | gctctttttc  | gtcaatattg  | tagactattt  | cattaatatt  | gttactaatt  |
| 2881 | ttaatatcaa  | acatttttcta | ttgcctcaat  | tttccatatt  | tcactcgaag  | aatcttttaa  |
| 2941 | cgggtggttca | aaaatcttgt  | agaacctttt  | ttcaatcttg  | atataatcac  | caatgctaaa  |
| 3001 | ggaagtaacg  | tcctgatcac  | gtattttctat | agaagcaatt  | tgctgagtta  | atgctccatc  |
| 3061 | tgcacctaga  | gagtagcgtg  | tctcaggacg  | tttaattagc  | actttttattc | tacgaatgcc  |
| 3121 | ctccttattt  | ttattacaat  | atgtggcttc  | cactcctaaa  | tgctcaaaac  | aatctttctaa |
| 3181 | taatttttctt | atattcatca  | actagaacta  | atttttacca  | aaactcccgg  | acgatggcac  |
| 3241 | attggcaatg  | gattcgactg  | cgtatgtaaa  | tcagttcctc  | tatcaaactc  | tcttggctct  |
| 3301 | tgttttgcat  | agagtggctg  | tccaagagta  | ttcactgttt  | cattaaaatc  | tgctggtgca  |
| 3361 | aaatatgttg  | taaatgtgct  | tgctgttcct  | actggaaaac  | agtgcctgtg  | atcttttctca |
| 3421 | ataaatcttc  | ttacggttcc  | ttcagggtcg  | gttgcttgcc  | ctctatatctc | ctcaaatggt  |
| 3481 | atgccacaga  | acgtaaatcc  | tgacctcata  | tcattttcgaa | gtgctgctcc  | ttcttgccat  |
| 3541 | ctttcatatg  | cttctttttac | tttagcatga  | gaagttaatg  | catcaaaaaa  | ctcagggtct  |
| 3601 | accaaggcat  | gaattccagt  | catatattca  | ccacttagat  | tatcttctat  | gtgccggagt  |
| 3661 | acttccagac  | acttacgttt  | tacgtcagtt  | gttgctgttc  | caagggcaaa  | atttactact  |
| 3721 | tttgggtgta  | tttcaaattc  | gttgtagaca  | tttaataatc  | ctgacccatc  | agcatctaaa  |
| 3781 | attattcctt  | tgagcgctcc  | cattcgcaaa  | tgctctaatt  | ttattgcatg  | tttgtttctc  |
| 3841 | attagctgca  | aatgatcagt  | tattacatct  | gcaagcgctt  | taagttcact  | ctctgatcca  |
| 3901 | aatgccctta  | ttccttgtac  | ttcttctggc  | agcactacat  | catcatgcgg  | aatgtgcgga  |
| 3961 | atcgtaaagt  | ttcttacctt  | tctttttcct  | ctttttccta  | ctgttgctgg  | tgctccgggt  |
| 4021 | acttgcgttg  | gtagtaaact  | taacactccg  | ttgtgttctt  | ctatcgtaat  | atgtctaaat  |
| 4081 | cttactgacc  | tacttggaac  | caaattttaa  | ttttcaacac  | gtccataatt  | tatcggcaat  |
| 4141 | atattcatcg  | catttggttag | tgccgctcatg | ctaaatgctg  | tattcgtaaa  | tggattttgc  |
| 4201 | attctttttc  | ccccttatta  | atttaagtta  | cactcccttg  | cggacaatga  | tccctcgtcc  |
| 4261 | ttcaagttgc  | tttattgctg  | cagctttttg  | ctcttcagtg  | atacctgttg  | gccacacaat  |
| 4321 | tgcatgatct  | gctagcattg  | ctatacgtgt  | aatgattact  | gctttggcat  | tttctgtcgc  |
| 4381 | atttacatca  | cttactatcg  | cacctattgc  | tgtttggtga  | ccatctgttg  | cagttggatt  |
| 4441 | tattatctta  | atcatgttat  | ccttatcact  | accaacaact  | gtaccaagtt  | taagattttg  |
| 4501 | tcccttggtt  | acagttattt  | ggtctcttga  | atatagactt  | gatgcctcat  | actttaataa  |
| 4561 | gtcacctaga  | ttatttttgt  | cgattatata  | actcataaaa  | tttcctcatt  | tattttcccc  |
| 4621 | tttagtttta  | ccgccatggt  | tgtaattggt  | gtacgcggcg  | gttataaaaa  | aacttaataa  |
| 4681 | cttgattgcg  | ctctagtcct  | tgctacctcc  | atcatcaact  | cttctcctga  | attctgcggt  |
| 4741 | attgacttca  | gtatctctgt  | ctttttcggt  | ctctctgcaa  | gtaattccat  | taaaacttcc  |
| 4801 | ctggcttgct  | caatacttac  | gccttgctct  | ataaattctt  | ctattttctc  | tggcattcgt  |
| 4861 | gataagttac  | ataaacgtat  | taattcaaga  | acttcagtac  | gatacttagt  | taaattatca  |
| 4921 | gtttctaggt  | cagttgtagt  | ttgttcattc  | atagtaatac  | tcctgttttt  | attaatagat  |
| 4981 | gaaagaattg  | taattccatc  | tgcaagacct  | atctctattg  | ctctctcgcc  | aaaatatagc  |
| 5041 | cctgcctccg  | ttgatcgaat  | cttttcaatt  | gaaagacctc  | tgttcctcgc  | tattagctgc  |
| 5101 | acaaacattt  | catatagtcg  | gtctacttct  | ttttgtaagc  | tttccagact  | ttcagacgtc  |
| 5161 | attggctcat  | gtggatttaa  | atcatttttt  | ctacttcctg  | caaatactgt  | ggtatatattt |
| 5221 | attccacatt  | tttcattaaa  | tccactttga  | tctatatgac  | ttgcaattac  | ccctatgctt  |
| 5281 | cctactcctg  | aggttctgct  | cacaaatacc  | ttttcagcgc  | tagaggctat  | agcgtacgca  |
| 5341 | gcagaatatg  | catcatcatt  | tgctatcgct  | attatcctct  | tttttgctct  | tgattcataa  |
| 5401 | ataaagtcag  | ctaggtcaaa  | tataccgttt  | acctctcctc  | cggggetatc  | tatttccagt  |
| 5461 | ataattgtct  | ctatgctact  | atctgctaatt | gcttggttaa  | tttgttcttc  | tatttgctca  |
| 5521 | tatgatgtca  | ttccgagcat  | ttcatcaaat  | gcaccagggt  | ttttagttaa  | aatgccatgt  |
| 5581 | atcgggtatta | ttcctctttc  | actattttct  | actgcatgtt  | ttatatTTTT  | aaagataggc  |
| 5641 | tgcttttctg  | tttgtagtga  | cagtaactca  | aaactccttg  | gttctaccat  | tacacatctg  |
| 5701 | tttagccatt  | gttggtttcat | atcacctctt  | gatttgacgt  | aacctcagaa  | tcaaaaactta |
| 5761 | agcccagttc  | gcttgacagt  | ctttgatctt  | ctgctatttc  | ttggtcaatt  | tcttcaacat  |
| 5821 | cgtaacccat  | ttctgatact  | acttccgata  | gactcttaaa  | tccattttct  | actgccattt  |
| 5881 | gttggtgctg  | ctgatctttc  | agtggatcca  | cccaatcaaa  | tccctgtggg  | atccatttta  |
| 5941 | cttcttcttt  | cgctgctttt  | actacttttt  | catctatact  | tagttctcca  | caaagcactg  |
| 6001 | ctaattctag  | ccatctattc  | caaataaggtc | tacaaaaactg | gaacactatc  | acgttatgct  |
| 6061 | gtaacattgc  | acaccttctg  | cgaaactcta  | tcagccctgc  | tcgaatggat  | gaataattaa  |
| 6121 | cgccggttaa  | atctcctgtt  | agttgctcgt  | atgttattcc  | tgttcctatt  | gctattgccc  |
| 6181 | tcagttgctg  | tcttataaac  | gcttcataac  | ttcctccaac  | atctgacggg  | tctgaaaatt  |
| 6241 | ttatgtcttc  | tcctgggtct  | aaaagctgca  | ttgttccttg  | ctctaaacct  | gataatgcta  |

|      |              |             |              |              |              |               |
|------|--------------|-------------|--------------|--------------|--------------|---------------|
| 6301 | ctccttgctc   | attcgcttcg  | ccttctccta   | aaatatattgc  | ctcaggatca   | agtcttgtaa    |
| 6361 | taaaccctgc   | aaacattgct  | gctgtctttt   | ttctcactaa   | ttctgcatca   | tcgtattgat    |
| 6421 | caagctcata   | aagtttcaga  | agtatactcg   | aaagccaagg   | ctccccctca   | at ttgcccag   |
| 6481 | gtcttagtgg   | tctatagata  | tgtaaaacat   | cgtttgctgg   | tactctcact   | gactctccaa    |
| 6541 | acgaaccttc   | tcctggatgt  | tctctaaata   | agtaatatgc   | ctctctttgc   | ccaagcttgt    |
| 6601 | taaactcaat   | cccgtttcct  | attacattac   | catttcctaa   | agtttgattt   | gttttattat    |
| 6661 | ctaaatgttc   | agactcaagt  | acttgcagtt   | gtaatggcac   | agaaaatcta   | tcttccagct    |
| 6721 | ttctcgttct   | taaacgtaca  | aaacattctc   | ctccccctat   | catacttctg   | catactagag    |
| 6781 | cttgtaatcc   | ataaaaaatca | cttattccac   | agctatctgc   | ttcatctgtc   | catcttagcc    |
| 6841 | ataattcttg   | caccttcttt  | cgaaattctc   | catctcttgc   | ctttgattgt   | ggttttattc    |
| 6901 | ctgttccaat   | cgagttactt  | actattgtat   | caattatatt   | tgctgcatat   | ggattttttc    |
| 6961 | ttaccatata   | acgtgatcta  | ctacgcaaag   | tttcaaggct   | ttgagagagt   | aaattgttta    |
| 7021 | tacttctctg   | ttccccctgc  | caatacatta   | ctcttcttcc   | tgagcctgct   | gcatcccaag    |
| 7081 | cagaactttt   | gatttttggc  | ttactaaata   | gttgtttgaa   | at tt ttcagc | atcactactaa   |
| 7141 | ccaaaattct   | cttaattctt  | tcaaagttcc   | gttaaattta   | tttctgtcac   | at tt tccgat  |
| 7201 | tccttctact   | tcatgtggct  | ctggatttgt   | tttaccgtca   | gtatattgcc   | ataaaaatcca   |
| 7261 | atcattccag   | ccttttggtg  | atgtgagctc   | ttttctccag   | cttgctatcc   | ataatggaca    |
| 7321 | ttttgtcaaa   | gttggcgtgg  | caaaatcctt   | aagaaaatag   | ctactgccat   | aaattagggg    |
| 7381 | taatcttctt   | gttacttctt  | caactctctt   | tacaaattcc   | tcagcttgct   | taactgcaat    |
| 7441 | at tt tttgcc | cttttgtttt  | cttcaatata   | cagcgcaagt   | atgggtatttt  | tgctttcgcc    |
| 7501 | taccgttttt   | agaaaatgat  | cagcttgatt   | cttgccgttt   | ccttctgtgc   | caaaatgata    |
| 7561 | tgctccccag   | agtaatcctt  | cttcttcagc   | tttctttctt   | ctcttcgcat   | actttgaatc    |
| 7621 | cacatgtttt   | agcccttggt  | ttgccttggt   | aattactcca   | actataccat   | tctctttgtc    |
| 7681 | tagcttaaaa   | ttcacatttt  | cttgccaatg   | tgacaaatct   | attattccat   | ttactggact    |
| 7741 | ctctctattc   | tcccatagtt  | ttataaaagt   | ttttaattgc   | tctaaaaatt   | cagaatattc    |
| 7801 | ctctttttaca  | actttttctca | gaaaattttc   | cctcatataa   | ctcctttatt   | tgttgcaaaa    |
| 7861 | ataatctttc   | gttttaggctt | cattccagca   | atcttttagtt  | cacctttgat   | gcgttgctctg   |
| 7921 | aggctgagca   | aatcattttat | ctgaacttca   | gcataatctca  | ccacatgggtc  | accatatgca    |
| 7981 | attgatacta   | ctcgctctcc  | gttttgtagt   | ttcttttatcg  | cttcttcgac   | ttgaattaga    |
| 8041 | taatcttcgt   | tatacatttta | ctactcgctg   | atccattttgc  | ttttcactat   | tttctttgat    |
| 8101 | tttttacttt   | ctgggtttttc | acttaaaacta  | ttccattttac  | tctctggcca   | tctatctatt    |
| 8161 | cccagtgtca   | tcgatgtctgc | tcttgcataa   | atcctacagt   | ctaatacttc   | at tt tctttct |
| 8221 | cttacctttt   | gccactcttg  | tttggtataa   | ccttttacta   | ctttgctgac   | taattgctct    |
| 8281 | gccgttagct   | gcttaaaaata | ttcaggtgca   | tactcgggaa   | aatgacagta   | tcctgctgga    |
| 8341 | gcttcttcac   | cgtccttttaa | aacatttaagt  | aattgaaaaa   | gttctgactt   | taaaatcgat    |
| 8401 | actcccactg   | gccagagctt  | tattcctctt   | tttagctttt   | gaccaccaac   | tggtatatct    |
| 8461 | actctacttg   | ggctgctaag  | tggtactaga   | gctttatttta  | cacctttcac   | tgccattact    |
| 8521 | cttccagagc   | cttgatgacc  | tcttacccaa   | ttgtatactt   | cttgtgtcgc   | at acccagca   |
| 8581 | tcaaccgcca   | tcatacttat  | catgtattca   | agaccatttt   | caccgataaa   | atgatgattt    |
| 8641 | aagagctcag   | agagtttttcc | ccatacttct   | cctcttccag   | tatcaccttc   | aaatactcgg    |
| 8701 | tattctattg   | accaactttc  | gcggcttttt   | ccccatgcta   | caacttctac   | ttctaaacga    |
| 8761 | tcttttttga   | catctactcc  | tgcagtaagc   | accacttctc   | tcctaggtac   | tgtgcctacg    |
| 8821 | ggaaaaaatt   | ctctcctgtt  | aaataattgc   | ttccaatctg   | gtacttctcc   | tttgtctacc    |
| 8881 | caggttttctc  | caagcgtagt  | at tt taccat | acttttagta   | attgttccact  | ttcttttgca    |
| 8941 | tgaagaaaat   | cttctactgc  | ttgagtccag   | ctataccagc   | ctactggact   | ataaagactt    |
| 9001 | gaaagatgaa   | atcctttttt  | ctcacctttt   | actctattag   | taggtctcca   | ttctccacgc    |
| 9061 | tcaagcatct   | ctgtcttttg  | atgattttct   | at tt tggcgc | tacattcagt   | gcagacataa    |
| 9121 | tgtgctgttc   | ttgagtcgtt  | gttttcccat   | ttaat ttgtg  | accatttttag  | aacttgatag    |
| 9181 | taattacaat   | acggacatgg  | tacaaaaaag   | tactgcttat   | ctgttgcttc   | aaattctttc    |
| 9241 | tcaattctgc   | ttattccatg  | aatcgtttgt   | gttgatacta   | aaaaaatctt   | tcgccgtgca    |
| 9301 | gatgtattag   | ttcgagcaat  | actgagcagc   | actggatctc   | cttcaccacc   | tgaatctcct    |
| 9361 | ggataggcgt   | ctatttcatc  | aagaaagaga   | tattttactg   | gcatagacct   | cagtcctaca    |
| 9421 | ctgctgtttg   | ctccagttat  | tactactatt   | ccacctggaa   | attccttact   | ttgtacagta    |
| 9481 | ttgcctgagt   | ctcttgacct  | tgggtctttt   | actttactct   | ttaaacatgg   | cgtactctct    |
| 9541 | attaacggcg   | caaactttcc  | ttttgaccaa   | cgttttccca   | tttcaactgt   | tggctgcaca    |
| 9601 | actaacattg   | gaccaggagt  | ctgatataata  | atatagccta   | tccaattggt   | accagcttct    |
| 9661 | gttccctcaa   | tctgcgctcc  | tttcatgaat   | actacttttt   | ctgctgggtga  | ggacggagaa    |
| 9721 | agtgaatcca   | tgatttcttt  | taaataagga   | gttctttctg   | ttctccattt   | acctggctct    |
| 9781 | gatgctgcag   | ttggcgctaa  | aactcgatac   | tcatttgccc   | actctgatac   | tttaagctct    |
| 9841 | ggatctgggt   | ttaaaccttc  | agagaaagat   | gtggcggtata  | tcattgtctg   | catctactca    |

```

9901 taattggttc tatctcaaca tcattaacag tagaactaca ctcttccaat tccataaaca
9961 tctttttctg aaattccttt tctatatatc ttttgctcat ctactttatc attagtgtga
10021 taataagcgc aaatatccct gttgttggtg caaaaatgat tgcactgtct attgttggtg
10081 ctgttaaacc tatatatgct gccattgcta ctgcgctaac tgtaatacag atgcagataa
10141 tattattatg ttttttcata cttttatctg ctatttctct ctgtgtctata tatttattat
10201 gaagggttgg aaaattaata acggtatctc tgcagagcaa tgcaccattt ttttcagtaa
10261 ataaaacttt aagtaactct aaattgtttg atttaattgc taaatgtaaa acaggtgtat
10321 aatttgctcc ttttttcagc aataacttta ctacatgtaa atgccctttt tccgcagcaa
10381 ggtaaaccgg tgataaacct ttattattta caatatcaat atcgatttct tcttttaaga
10441 tagactctac aagctcaatt tctcctcttt gtgcagctaa atgtagtaga ctattctttt
10501 cagaaccgta tttattactc atcaaagcct tctttatctc aggttttagcg taatcaaagt
10561 gtgtcttacc attatcatcc ctgattaaag gatctatatc ctctcgagtt agtaaaacct
10621 ctattgtttt aagtctttca gcgtaatgta gtggcgtttt attttcgtag tcttgcaaat
10681 ttacttgagc attaggctcc tttattaagc atttgagaat atcaagacac aaatctcttt
10741 catcgtaatt agtattactt acagctatat gaacaggcga caatttcatt gagttttgtc
10801 ccatgcgtgc actattttaca tctgctccaa gtttcagcag taactttact atctctaact
10861 ttttgttatt aactgcatag tgcattgggtg tctgatttctg tgcataaaag acatctattt
10921 cagcatttcc ttcttccact aaaattttga caatatctc atgtcctatt cctgatgcta
10981 gatgtaatgg tgtatgatgc agagcatttc gtacattaac gtcaatacct tttctgatca
11041 aatatctcac tgcattaact tcacctatca ttgcagctaa atgaagtaag ctatcttggt
11101 ctgatccgta tttgtgattg attaatgctt gtaatatctc tgctttttta ccttctttgg
11161 cataatctaa ggagggtttg ccttcattgt cctcaacaaa aggattaatg ttcttcttcg
11221 tgagtaataa atccaccatg cttaactcgt caaactctat agcgcaatgt agtgggtgct
11281 ttccatttaa tcctctgaca ttaacatcta atccagggtg attgatgaga cattttatta
11341 actccaaact taagttatca gccattttat attcaaaatc ttttttatat ttgaaattta
11401 gtattagata attcttgtaa tgagtttgta atctcttcg ttagcgtctt atgaatcttt
11461 tcagtgtcgc tcagtgatgc aagcagtgtc gaaactctat ttggaatatt aagcaaatta
11521 ttacggacaa ctcttgctac attaaatgca tgcgcgttta cttcctctac tgctacaagt
11581 tcaccaatcc cagccttagc tttcgcctca agcagtttac cacgttccat ctcatttttt
11641 attcgcgttt ttagcaacat ttagaaaagg ttatttgat tttcgttttc tggatttttc
11701 ctcctaagtg gctgacttgg atctcttatt gctgccaccg cttcatttgc ttgttctcta
11761 ctgatcaaac catcctccaa ctcaactatt cctttcttta ctagataata gacatattgc
11821 tttgatactc ctatctctct tgcccattcc gtttggtgta tcttttccac tttttttgct
11881 tcttttttac aaattttctt cttgaatctc tgaaaagggt ttgccagtag cggctaaaat
11941 ggcattctct ccggtatata tttgccaacg ttttatagtt acatctacaa att

```

//

```

LOCUS      JAQZAU010000032          3012 bp    dna        linear    ENV 17-MAR-2023
DEFINITION MAG: Wolbachia pipientis isolate wEsol contig_26490, whole genome
            shotgun sequence.
ACCESSION  JAQZAU010000032  JAQZAU010000000
VERSION    JAQZAU010000032.1
DBLINK     BioProject: PRJNA929258
            BioSample: SAMN33142973
KEYWORDS   WGS; ENV; Metagenome Assembled Genome; MAG.
SOURCE     Wolbachia pipientis (insect metagenome)
ORGANISM   Wolbachia pipientis
            Bacteria; Pseudomonadota; Alphaproteobacteria; Rickettsiales;
            Anaplasmataceae; Wolbachieae; Wolbachia.
REFERENCE  1  (bases 1 to 3012)
AUTHORS    Fiutek,N., Couger,B.M., Roy,S., de la Torre,J.R. and Connor,E.F.
TITLE      Genomic assessment of the contribution of the Wolbachia
            endosymbiont of Eurosta solidaginis to gall-induction
JOURNAL     International Journal Molecular Sciences
REFERENCE  2  (bases 1 to 3012)
AUTHORS     Fiutek,N., Couger,B.M., Roy,S., de la Torre,J.R. and Connor,E.F.
TITLE      Direct Submission
JOURNAL     Submitted (10-FEB-2023) Biology, San Francisco State University,
            1600 Holloway Ave, San Francisco, CA 94132, USA
COMMENT    ##Genome-Assembly-Data-START##
            Assembly Date          :: JUN-2019

```

Assembly Method :: FLYE v. 06-2019  
Genome Representation :: Full  
Expected Final Version :: Yes  
Genome Coverage :: 100.0x  
Sequencing Technology :: Illumina HiSeq; PacBio Sequel  
##Genome-Assembly-Data-END##

FEATURES  
source 1..3012  
/organism="Wolbachia pipientis"  
/mol\_type="genomic DNA"  
/submitter\_seqid="contig\_26490"  
/isolate="wEsol"  
/isolation\_source="galls on Solidago altissima"  
/host="Eurosta solidaginis MN-2018-EFC"  
/db\_xref="taxon:955"  
/environmental\_sample  
/country="USA: Cowling Arboretum, Carleton College,  
Northfield, MN"  
/lat\_lon="44.48 N 93.13 W"  
/altitude="280 m"  
/collection\_date="2018-11"  
/metagenome\_source="insect metagenome"  
/note="metagenomic"  
gene 281..1627  
/locus\_tag="wEsol\_00228"  
CDS 281..1627  
/locus\_tag="wEsol\_00228"  
/codon\_start=1  
/transl\_table=11  
/pfam="DEDD\_Tnp\_IS110 Transposase\_20"  
/fullproduct="qcoverage 100 , hcoverage 100 , similarity  
100 , identity 100 , evalue 0.0 , alnlength 448 ,  
Bacteria , Proteobacteria , WP\_155968747.1 MULTISPECIES:  
IS110 family transposase [Wolbachia]"  
/translation="MIKAKNKLEIVNPDTTGIDIGSAVHYVCVPEGRDEQRVKKFGCF  
TVDLHNLAGWLKKCKVRTVAMESTGVYWIPLFQILESYGFEVKLVNARYIKNVPGRKS  
DVQDCQWLQQLHSYGLLHGSFRPDDQMCVLRNYVRQRSNLIESASTHILRMQKALIOM  
NVQLHKVISDITGVTGMQIIKAIIEGERNPEKLSELRDVIRNDRSTMAKALKGDYRK  
ELLFVLKQEFELYNIYQEKIAECDKSIEQYYKTFETKSDENKRCISKIKNRFSKNRPDF  
PLHEELYRVTGIDFTKVPGLDVLTIQTIISEVGLNHDKWPSEKHFTSWLGLSPANKVT  
GEKVFGTRTRKVIARAANAFRMAAQCVSRNNGGIGAYCRLKRLGAPKAITATARKL  
ACIFYSMLKYGQEYVEKGIDYIEKLYKEKIVKTLSSKASEFGYVLIKKELLAERVS"  
/product="IS110 family transposase"  
/besthit="qcoverage 100 , hcoverage 100 , similarity 100  
 , identity 100 , evalue 0.0 , alnlength 448 , Bacteria ,  
Proteobacteria , WP\_155968747.1 MULTISPECIES: IS110  
family transposase [Wolbachia]"  
gene 1810..2118  
/locus\_tag="wEsol\_00229"  
CDS 1810..2118  
/locus\_tag="wEsol\_00229"  
/codon\_start=1  
/transl\_table=11  
/product="hypothetical protein"  
/pfam="Pfam-B\_5362"  
/translation="MDVSKGGIEMSFTTEVGEISIIYLSPEKGSNKKIKVEIDGENRAR  
FNELKNRGKSLGENCLLGGKSVEEAIEHESFERYGSPNTAMKEPSLGCVAKRLSGNK  
"  
/besthit="qcoverage 98.0392156862745 , hcoverage  
44.8430493273543 , similarity 95.0 , identity 95.0 ,

evaluate 7.70e-59 , alnlength 100 , Bacteria ,  
 Proteobacteria , ONI56661.1 protein, WF-1 [Wolbachia  
 pipientis wUni]"  
 gene 2156..2536  
 /locus\_tag="wEsol\_00230"  
 CDS 2156..2536  
 /locus\_tag="wEsol\_00230"  
 /codon\_start=1  
 /transl\_table=11  
 /fullproduct="qcoverage 100 , hcoverage 100 , similarity  
 100 , identity 100 , evaluate 1.16e-87 , alnlength 126 ,  
 Bacteria , Proteobacteria , AOV87106.1 transposase  
 [Wolbachia endosymbiont of Drosophila incompta]"  
 /cog="COG3293 COG3293 124 Transposase and inactivated  
 derivatives"  
 /pfam="DUF4096"  
 /product="transposase"  
 /translation="MRKKYPTDLSEREWARIKHFVRSYKKGGRRPPKYSKREILEAIF  
 YVLRGTGCQWRYLPNDFPLWKTVYEQFRQWKKQGIFEKMNIEITKYSRRKIGRNEQPSA  
 CIVDSQSVKTTEKGGSKAMMEVKK"  
 /besthit="qcoverage 100 , hcoverage 100 , similarity 100  
 , identity 100 , evaluate 1.16e-87 , alnlength 126 ,  
 Bacteria , Proteobacteria , AOV87106.1 transposase  
 [Wolbachia endosymbiont of Drosophila incompta]"  
 gene 2647..2988  
 /locus\_tag="wEsol\_00231"  
 CDS 2647..2988  
 /locus\_tag="wEsol\_00231"  
 /codon\_start=1  
 /transl\_table=11  
 /fullproduct="qcoverage 100 , hcoverage 100 , similarity  
 100 , identity 100 , evaluate 1.53e-79 , alnlength 113 ,  
 Bacteria , Proteobacteria , AAS13810.1 transposase, IS5  
 family, OrfB [Wolbachia endosymbiont of Drosophila  
 melanogaster]"  
 /cog="COG3293 COG3293 124 Transposase and inactivated  
 derivatives"  
 /pfam="DDE\_Tnp\_1\_2 DDE\_Tnp\_1"  
 /product="transposase, IS5 family, OrfB"  
 /translation="MRTKYTKVKMWADMGYQGRNLKNHIKEEYDIDIEIVKRPPCRF  
 WVHKDTPPELLPTREQGFKVQPRRWVVERTFAWVNRNRRLSKEYDLLTTSTENFIYLA  
 MSRVMLKREYA"  
 /besthit="qcoverage 100 , hcoverage 100 , similarity 100  
 , identity 100 , evaluate 1.53e-79 , alnlength 113 ,  
 Bacteria , Proteobacteria , AAS13810.1 transposase, IS5  
 family, OrfB [Wolbachia endosymbiont of Drosophila  
 melanogaster]"

# ORIGIN

```

1 tgtattagga ggcgtgaaca agaaaaaaaaat cttgttaaag cggaagaaa ctatttcttc
61 acttccatag caatttttat atataattta tcaagaagta cttctgcagt tataaccgac
121 tgatcaatgg tgcttaagtg cccgttttagg agcgtggttt tggaggaacg gttaaacacc
181 tgatggagtc tattatgact acctcgatta gaagattgta taatctaacc gtcccaagct
241 taagtgtctt tccattataa gttatagtag gataattacc atgataaagg caaaaaataa
301 actagaaata gtgaatcctg atacaacagg aattgatatc ggctcagctg tacattatgt
361 atgtgtacct gaaggaagag atgaacaacg tgtcaaaaaa tttggatgct ttacagttga
421 tcttcataac ttagcagggt ggttaaagaa atgtaaagtt agaacagtag ctatggaatc
481 aacaggagta tattggattc ctttgtttca aatacttgag tcatatggat ttgaggtaaa
541 attggtaaat gcacgatata ttaagaacgt gcctggtaga aaatccgacg ttcaagactg
601 tcaatggtta caacaattac acagctatgg attactccat gggtcgttta gacctgatga
661 tcaaatgtgt gtgttcgcta attacgttag gcaacgtagc aacctgattg aaagtgcac

```

```

721 cacacatatt ctacgtatgc aaaaagcggtt aattcaaagt aacgttcaat tacacaaagt
781 cataagtgat attactggag tgaccgggtat gcaaattatc aaagcaataa ttgaagggtga
841 aaggaatcct gaaaaattat cagaattgag agatgtacgg ataagaaatg atagatctac
901 catggcaaaa gcgctaaaaag gcgactacag aaagggaactc ttatttgtgt taaagcaaga
961 atttgaattg tataatatatt atcaggaaaa aatagcagaa tgcgacaaaa gcatcgaaca
1021 atattacaaa acatttgaaa caaatctga cgagaataag cgatgcagca aaataaagaa
1081 taggtttttca aaaaacagac cagactttcc tttacacgaa gaactgtata gagtaaccgg
1141 tattgatttt actaaagttc ctgggcttga tgtgctaact atacaaacaa ttatctcaga
1201 agttggtttg aaccacgata aatggccatc agagaagcac tttacttctt gggtggggct
1261 aagtcctgct aataaagtta caggggaaaa agtatttggg acgagaactc gcaaagttat
1321 tgctcgtgct gcaaagtctt ttaggatggc tgcccagtgt gtgtcaagaa gcaacgggtg
1381 gattggtgca tattgcagaa ggttaaaaaa acgactagga gcaccgaaag cgattaccgc
1441 tacggctagg aaattggcgt gcatttttta tagtatgcta aagtatggac aggaatatgt
1501 agagaagggc attgattact atgaaaagtt atataaggaa aaaatagtga agactctaag
1561 caagaaagct agtgaatttg gttatgtctt gattaaaaaa gagctactag cagaaagagt
1621 ttcttagaag tagacaagga taatagatat ttttgtatag agtactcgca agatagtatt
1681 gttgaatttg cagaaatcct aaacaatgaa aaagccaaag acttaaatTT aagagttggc
1741 atactcaaaa ttggagaaaag tatagtaaga gttgaaaatg tagaagaaat agggggaaaa
1801 agaaattaca tggatgtctc aaaaggtggt attgaaatgt cttttactac tgaggtagga
1861 gagataagta tttatctaag tcctagttag aaaggcagca ataaaaataa agtggagatt
1921 gatggggaaa acagagcaag gtttaatgag ttaaaaaata ggggaaaaag tttaggggaa
1981 aactgtcttt taggaggaaa aagtgttagg gaagctatag agcatgaaag ttttgaaaga
2041 tatggcagtg tacctaacac tgctatgaag gaacctagct taggttgctg tgctaagagg
2101 ttgtccggaa ataagtaaaa ggctataata tctgaaatTT tagtacgggg taaagatgag
2161 aaaaaagtat ccaacagatc taagcgaag ggaatgggca agaatagaaa aacacttcag
2221 agtatcatac aagaaaggag gaaggccgcc aaagtatagc aaaagagaaa tattagaagc
2281 aattttctat gtattgcgta caggggtgtc atggcgggtt ttaccaaagT attttccgct
2341 atggaagact gtgtatgagc agttcaggca atggaagaag cagggaaatt ttgagaaaat
2401 gaattatgaa attacaaaat atagtagaag aaaaatagga aggaatgagc agccgagtgc
2461 ctgtatagta gatagtcaat ctgtaaagac tacagaaaag gggggatcaa aggctatgat
2521 ggaagtaaaa aagtaaaggg tagaaaaagg catataatta cagacactca ggggtttata
2581 ctaggttggt acgtaggcgc tgctaacgaa aatgatagag atgggtattaa aatagcatta
2641 aacaatatga gaacaaaata tactaaagtt aaaaaaatgt gggctgacat ggggatacaa
2701 ggaagaaatt taaagaatca cataaaggaa gaatatgaca tagatattga aattgttaaa
2761 aggcctccat gtagattttg ggtgcacaaa gatacgccac ctgagctact accaacaaga
2821 gaacaagggt ttaaagtaca gccagaaga tgggtttag aaaggacttt tgcttgggtt
2881 aataggaata gaaggctatc gaaggagtat gatttactca caacatccac tgagaatttc
2941 atatacctag ctatgagtag ggttatgtta aagaggaat atgcttgaat ttactagttt
3001 ccggacaacc tc

```

//

```

LOCUS      JAQZAU010000033                2559 bp    dna        linear    ENV 17-MAR-2023
DEFINITION MAG: Wolbachia pipientis isolate wEsol contig_26953, whole genome
            shotgun sequence.
ACCESSION  JAQZAU010000033 JAQZAU010000000
VERSION    JAQZAU010000033.1
DBLINK     BioProject: PRJNA929258
            BioSample: SAMN33142973
KEYWORDS   WGS; ENV; Metagenome Assembled Genome; MAG.
SOURCE     Wolbachia pipientis (insect metagenome)
ORGANISM   Wolbachia pipientis
            Bacteria; Pseudomonadota; Alphaproteobacteria; Rickettsiales;
            Anaplasmataceae; Wolbachieae; Wolbachia.
REFERENCE  1 (bases 1 to 2559)
AUTHORS    Fiutek,N., Couger,B.M., Roy,S., de la Torre,J.R. and Connor,E.F.
TITLE      Genomic assessment of the contribution of the Wolbachia
            endosymbiont of Eurosta solidaginis to gall-induction
JOURNAL    International Journal Molecular Sciences
REFERENCE  2 (bases 1 to 2559)
AUTHORS    Fiutek,N., Couger,B.M., Roy,S., de la Torre,J.R. and Connor,E.F.
TITLE      Direct Submission

```

JOURNAL Submitted (10-FEB-2023) Biology, San Francisco State University,  
1600 Holloway Ave, San Francisco, CA 94132, USA

COMMENT ##Genome-Assembly-Data-START##  
Assembly Date :: JUN-2019  
Assembly Method :: FLYE v. 06-2019  
Genome Representation :: Full  
Expected Final Version :: Yes  
Genome Coverage :: 100.0x  
Sequencing Technology :: Illumina HiSeq; PacBio Sequel  
##Genome-Assembly-Data-END##

FEATURES Location/Qualifiers

|        |                                                                                                                                                                                                                                                                                                                                                                                                                                                                                                                                                                       |
|--------|-----------------------------------------------------------------------------------------------------------------------------------------------------------------------------------------------------------------------------------------------------------------------------------------------------------------------------------------------------------------------------------------------------------------------------------------------------------------------------------------------------------------------------------------------------------------------|
| source | 1..2559<br>/organism="Wolbachia pipientis"<br>/mol_type="genomic DNA"<br>/submitter_seqid="contig_26953"<br>/isolate="wEsol"<br>/isolation_source="galls on Solidago altissima"<br>/host="Eurosta solidaginis MN-2018-EFC"<br>/db_xref="taxon:955"<br>/environmental_sample<br>/country="USA: Cowling Arboretum, Carleton College,<br>Northfield, MN"<br>/lat_lon="44.48 N 93.13 W"<br>/altitude="280 m"<br>/collection_date="2018-11"<br>/metagenome_source="insect metagenome"<br>/note="metagenomic"                                                               |
| gene   | 45..227<br>/locus_tag="wEsol_00232"                                                                                                                                                                                                                                                                                                                                                                                                                                                                                                                                   |
| CDS    | 45..227<br>/locus_tag="wEsol_00232"<br>/codon_start=1<br>/transl_table=11<br>/product="hypothetical protein"<br>/pfam="HTH_Tnp_1 HTH_23 HTH_28"<br>/translation="MAREYTAEFKLEAVKLTNEQRKVGQPVAKVARDLGIRDSVLGKW<br>MKKYNEKSQRQMHHFQM"<br>/cog="COG2963 COG2963 116 Transposase and inactivated<br>derivatives"<br>/besthit="qcoverage 85 , hcoverage 70.83333333333333 ,<br>similarity 100 , identity 100 , evalue 8.30e-26 ,<br>alnlength 51 , Bacteria , Proteobacteria , WP_094189595.1<br>transposase, partial [Wolbachia endosymbiont of<br>Drosophila ananassae]" |
| gene   | 760..924<br>/locus_tag="wEsol_00233"                                                                                                                                                                                                                                                                                                                                                                                                                                                                                                                                  |
| CDS    | 760..924<br>/locus_tag="wEsol_00233"<br>/codon_start=1<br>/transl_table=11<br>/fullproduct="qcoverage 100 , hcoverage 100 , similarity<br>100 , identity 100 , evalue 2.93e-28 , alnlength 54 ,<br>Bacteria , Proteobacteria , WP_156768648.1 MULTISPECIES:<br>hypothetical protein [Wolbachia]"<br>/cog="Tra5 COG2801 232 Transposase and inactivated<br>derivatives"<br>/pfam="rve"<br>/product="hypothetical protein"<br>/translation="MSSSINKQLVMDSLLMVAVNKRKPAKNLLHSDQGSQYTSQGYQY<br>LLSIKNIDEL"                                                                 |

```

/blasthit="qcoverage 100 , hcoverage 100 , similarity 100
, identity 100 , evalue 2.93e-28 , alnlength 54 ,
Bacteria , Proteobacteria , WP_156768648.1 MULTISPECIES:
hypothetical protein [Wolbachia]"
gene 914..1078
/locus_tag="wEsol_00234"
CDS 914..1078
/locus_tag="wEsol_00234"
/codon_start=1
/transl_table=11
/pfam="rve_3 rve_2"
/fullproduct="qcoverage 100 , hcoverage 100 , similarity
100 , identity 100 , evalue 1.56e-32 , alnlength 54 ,
Bacteria , Proteobacteria , WP_080717620.1 MULTISPECIES:
IS3 family transposase [Wolbachia]"
/translation="MSYKGCCYDNSVVESFFSSLKRELPIDTSRHSKQHIKTAIFEYI
EIFYNKQRHY"
/product="IS3 family transposase"
/blasthit="qcoverage 100 , hcoverage 100 , similarity 100
, identity 100 , evalue 1.56e-32 , alnlength 54 ,
Bacteria , Proteobacteria , WP_080717620.1 MULTISPECIES:
IS3 family transposase [Wolbachia]"
gene 1133..1480
/locus_tag="wEsol_00235"
CDS 1133..1480
/locus_tag="wEsol_00235"
/codon_start=1
/transl_table=11
/fullproduct="qcoverage 100 , hcoverage 100 , similarity
100 , identity 100 , evalue 2.74e-74 , alnlength 115 ,
Bacteria;Eukaryota , Proteobacteria;Arthropoda ,
WP_155968342.1 MULTISPECIES: IS630 transposase-related
protein [Wolbachia]"
/cog="COG3415 COG3415 138 Transposase and inactivated
derivatives"
/pfam="HTH_Tnp_IS630 HTH_Tnp_1 HTH_23 HTH_28 HTH_29 HTH_7
CENP-B_N Pfam-B_14738 HTH_8 HTH_17 HTH_24 Pfam-B_2106"
/product="IS630 transposase-related protein"
/translation="MAYSVDLRERAVSMIEKGKSKVEVAELLEIGIATLYRWLRKKAA
GESLRPSKNGSFIRKIDPKILEEYVKNPDHTLAEMKQNLGFGINSIWYRLKQLRITL
KKSYSISRQSR"
/blasthit="qcoverage 100 , hcoverage 100 , similarity 100
, identity 100 , evalue 2.74e-74 , alnlength 115 ,
Bacteria;Eukaryota , Proteobacteria;Arthropoda ,
WP_155968342.1 MULTISPECIES: IS630 transposase-related
protein [Wolbachia]"
gene 1704..2084
/locus_tag="wEsol_00236"
CDS 1704..2084
/locus_tag="wEsol_00236"
/codon_start=1
/transl_table=11
/fullproduct="qcoverage 100 , hcoverage 100 , similarity
100 , identity 100 , evalue 1.16e-87 , alnlength 126 ,
Bacteria , Proteobacteria , AOV87106.1 transposase
[Wolbachia endosymbiont of Drosophila incompta]"
/cog="COG3293 COG3293 124 Transposase and inactivated
derivatives"
/pfam="DUF4096"
/product="transposase"

```

```

/translation="MRKKYPTDLSEREWARIEKHFRVSYKKGGRRPPKYSKREILEAIF
YVLRTGCQWRYLPNDFPLWKTVYEQFRQWKKQGIFEKMNYEITKYSRRKIGRNEQPSA
CIVDSQSVKTTEKGGSKAMMEVKK"
/besthit="qcoverage 100 , hcoverage 100 , similarity 100
, identity 100 , evalue 1.16e-87 , alnlength 126 ,
Bacteria , Proteobacteria , AOV87106.1 transposase
[Wolbachia endosymbiont of Drosophila incompta]"
gene 2195..2536
/locus_tag="wEsol_00237"
CDS 2195..2536
/locus_tag="wEsol_00237"
/codon_start=1
/transl_table=11
/fullproduct="qcoverage 100 , hcoverage 100 , similarity
100 , identity 100 , evalue 1.53e-79 , alnlength 113 ,
Bacteria , Proteobacteria , AAS13810.1 transposase, IS5
family, OrfB [Wolbachia endosymbiont of Drosophila
melanogaster]"
/cog="COG3293 COG3293 124 Transposase and inactivated
derivatives"
/pfam="DDE_Tnp_1_2 DDE_Tnp_1"
/product="transposase, IS5 family, OrfB"
/translation="MRTKYTKVKKMWADMGYQGRNLKNHIKEEYDIDIEIVKRPPCRF
WVHKDTPPELLPTREQGFKVQPRRWVVERTFAWVNRNRRLSKEYDLLTTSTENFIYLA
MSRVMLKREYA"
/besthit="qcoverage 100 , hcoverage 100 , similarity 100
, identity 100 , evalue 1.53e-79 , alnlength 113 ,
Bacteria , Proteobacteria , AAS13810.1 transposase, IS5
family, OrfB [Wolbachia endosymbiont of Drosophila
melanogaster]"

```

# ORIGIN

```

1 gaaaggagtt tttttgggta aaataaaatt ttggaggatt agaaatggca agagaatata
61 cggcagaatt caaattggaa gctgttaagc tgacaaatga acaaagaaag gtaggtcaac
121 cagttgcaaa agtagcaaga gatctaggaa taagggatag tgtattagga aaatggatga
181 agaaatataa cgaaaaaagt cagcggcaaa tgcatttcca gatgtagcac cttatgacaa
241 agagagattt gatttacaaa gcaaaagtaa caagagaaaag agacatttta aaaaaagccc
301 tggccagtc aaaaagagtaa aatatttttt tatatagtaa ctgctataaa gtacaggaat
361 tatgtaggat tttctgctag tggctactat aagtggacca caagaaaaat aagcagtaga
421 gaatcagcaa ataaagagtt attagcagat attcaaaaaa tatatcaagc ttctaaatgt
481 agatatggag ctctataaat tcatgctgaa ttaaaggcct tgggtaaaag ttgcaactta
541 aaaacagtgc aaagtattat gcagaaaaat ggtattcagg ctatattgag aagaaaattt
601 aaaattaaga aacaacaaac ggacagtagc tcccaatata ttagaccaa actttattgt
661 cgatcaacca aataaagtat gggattactt atataaaaac caaagaagga tggctatatt
721 tggcaacaat aatcgatcta tattcacgca tggtagtta tgagcagttc aataaataaa
781 caattggtta tggactcttt attaatggcc gttaacaagc gtaaacctgc caaaaatcta
841 ctattacata gtgatcaagg ttcacaatat acttcgcaag gttatcaata tctcttatcc
901 ataaaaaaca tagatgagtt ataaaggttg ttgttacgac aattctgttg tggaaagctt
961 cttcagttct ctaaaaaggg agttaccaat agacacctct cgacactcta aacagcatat
1021 caaaactgct atatttgaat atatagaaat tttttataac aaacaacgct actattaact
1081 atagtacttc ccaaagtaaa tgataaagg ataatagct atttgagtta taatggcgta
1141 tagtgtggat ttaagggaag gggcagtagc gatgatagaa aaagggaagt caaagggtga
1201 ggtggcagag cttttggaga taggaatagc aactctgtac cgctggttaa gaaagaaagc
1261 cgctggtgaa agcctaaggc catcgaaaaa cggcagcttt attcgaaaaa tagacccaaa
1321 aatactcgaa gaatatgtta aaaagaatcc agatcatagc ctggcagaga tgaaacaaaa
1381 tcttggaatt ggaataaatt caatttggtg taggctgaaa cagctaagaa ttactttaaa
1441 aaaaagttac actatatcaa gagcgcaatc aagaagatag gcagcgattt accgataaaa
1501 tctcaaaaat agaccattcc agcatcttat atatagatga agcaggaggt gataataggt
1561 tataccgaga gtatggacgt gctccaatag gaaagaaaat ttatgcagat attccaggaa
1621 gaaaacgaga gagaatcagt ataagagggt gtccggaaat aagtaaaagg ctataaatc
1681 tgaaatttta gtacggggta aagatgagaa aaaagtatcc aacagatcta agcgaaaggg

```



```

/metagenome_source="insect metagenome"
/note="metagenomic"
gene complement(1704..1847)
/locus_tag="wEsol_00238"
CDS complement(1704..1847)
/locus_tag="wEsol_00238"
/codon_start=1
/transl_table=11
/product="hypothetical protein"
/translation="MSGKHADERHEQPATQVEGIFRRYKSQPIKRVIHDLNPICERVG
KLL"
gene complement(4313..5269)
/locus_tag="wEsol_00239"
CDS complement(4313..5269)
/locus_tag="wEsol_00239"
/codon_start=1
/transl_table=11
/product="hypothetical protein"
/pfam="Ank_4 Ank_2 Ank_5 Ank_2 Ank Ank_4 Pfam-B_10896
Ank_5 Ank Ank_3 Pfam-B_10896 Ank_5 Ank_4 Ank_2 Ank Ank_3
Ank_4 Ank_2 Ank Pfam-B_10896 Ank_2 Ank_5 Ank_4 Ank Ank_4
Ank_3 Pfam-B_1714 Ank_2 Pfam-B_10896 Ank_3 Ank Ank_4
Ank_5 Ank Ank_3"
/translation="MMDLVRYLVDKGADVYTQDKGGKTLLDIATDQKHNNIVEYLRV
QLDKELLIAAQYGNLSKVEDLVSQRASLSAKYSDGRTLHCAAYGGELNVVKYLVVGE
KSSSLKIKDNSGRIPQLQYAAAYNGKLDIVKYFIDEEKIDVNIKDHGGWAPLYYASCGGYS
NVINYLGKIHNTDLISNLQGNSTSLEIPNSNNIEVQDELGRTPHLAAEAGDLSKINL
LCDDYNANIEAQDNFGYTPIFFATQSGKLNVSLLLLYYGANINAQDMYGSTPLHCAAQ
EGNLDMIQLLLSRCARISSQPLRSINLLSEIGVTKLGGNLNR"
/besthit="qcoverage 67.6100628930818 , hcoverage
6.33844339622642 , similarity 94.0 , identity 91.6 ,
evaluate 6.65e-51 , alnlength 215 , Bacteria ,
Proteobacteria , WP_208571528.1 ankyrin repeat
domain-containing protein [Wolbachia pipientis]"
gene complement(5238..6095)
/locus_tag="wEsol_00240"
CDS complement(5238..6095)
/locus_tag="wEsol_00240"
/codon_start=1
/transl_table=11
/product="hypothetical protein"
/pfam="Pfam-B_11762 Pfam-B_11762 Ank_2 Ank_4 Ank_5 Ank
Ank_3 Ank_2 Ank_4 Ank_5 Ank Ank_3 Pfam-B_1873 Ank_5
Pfam-B_10896 Ank Ank_3 Ank_4 Ank_5 Ank_3 Ank"
/translation="MNVAFNETLYAASNYFNYNDDRRMVFTWIPGGRVVRDLWTVKPD
GNSCSIMNVELNEYLYAADYAKYDNDRRRVFFWIPGGQVSQGMWMIEDCGSTLRKVRN
ADASSNLIVSRQVQLDYALLNATKIDNISEVTGLVNQGANVNTEDRDGNTPARNAVLK
GHFGI IKYLVEKGVSLKAEDHYCGPPTCNAAYSGLHNILKYLISKVDINDTDKNGWT
PLHFAAWRGLLEVANFLIEKGADINAENIFGRNP I HIAAENNNKDIIDFFLSKGMSID
DGFSKVPRR"
/besthit="qcoverage 60 , hcoverage 4.47409733124019 ,
similarity 76.0 , identity 71.3 , evaluate 1.47e-46 ,
alnlength 171 , Bacteria , Proteobacteria ,
WP_208571570.1 ankyrin repeat domain-containing protein
[Wolbachia pipientis]"
gene complement(6095..6532)
/locus_tag="wEsol_00241"
CDS complement(6095..6532)
/locus_tag="wEsol_00241"
/codon_start=1

```

```

/translation=11
/product="hypothetical protein"
/pfam="Pfam-B_11762"
/translation="MYGRVDTKETLSYVRSHHNAGQRISGYVAVFDAMQRNDDLNSA
IFKLAYVKEVMEMKNYSVDVHQEDRSNLEKLKSRLPESVRNAVFSKVCIKNVYQGEY
LYAANRCFDDYGDKRRTVFTWIPKDEKMISLGGRLNLMVTTFI"
/besthit="qcoverage 88.9655172413793 , hcoverage
3.27079107505071 , similarity 87.6 , identity 76.7 ,
evaluate 7.66e-57 , alnlength 129 , Bacteria ,
Proteobacteria , WP_211908378.1 ankyrin repeat
domain-containing protein [Wolbachia endosymbiont of
Spodoptera picta]"
gene complement(6545..7009)
/locus_tag="wEsol_00242"
CDS complement(6545..7009)
/locus_tag="wEsol_00242"
/codon_start=1
/translation=11
/product="hypothetical protein"
/pfam="Ank_4 Ank_2 Ank Ank_5 Ank Ank_3"
/translation="MLKIKTSMVVTLCRLLSKANLNIPKFLVDKGADIGAKDNDGRT
PLHVAAYSGDLDMVKFFLDKNASIEAKSSDPYKMMGVVEGVKNEIINQADTALNVKRW
AEFFVEKLRYSIKSVAKEKLKDGMLHNRYSVVELANEIYKSDGKLFDDIIK"
/besthit="qcoverage 83.7662337662338 , hcoverage
3.37519623233909 , similarity 90.7 , identity 88.4 ,
evaluate 5.90e-50 , alnlength 129 , Bacteria ,
Proteobacteria , WP_208571570.1 ankyrin repeat
domain-containing protein [Wolbachia pipientis]"
gene complement(6966..7157)
/locus_tag="wEsol_00243"
CDS complement(6966..7157)
/locus_tag="wEsol_00243"
/codon_start=1
/translation=11
/product="hypothetical protein"
/pfam="Ank_2 Ank_5 Ank_4 Ank_3 Ank"
/translation="MQSDISEAEDLTRKIETIDIEGKRLTPLYIAIQKGRLDIVEILF
DRKHFSVKDKDIYGCNPLH"
/besthit="qcoverage 92.0634920634921 , hcoverage
1.59165751920966 , similarity 89.7 , identity 72.4 ,
evaluate 6.65e-17 , alnlength 58 , Bacteria ,
Proteobacteria , WP_141456901.1 ankyrin repeat
domain-containing protein [Wolbachia endosymbiont of
Carposina sasakii]"
gene complement(7244..8335)
/locus_tag="wEsol_00244"
CDS complement(7244..8335)
/locus_tag="wEsol_00244"
/codon_start=1
/translation=11
/product="hypothetical protein"
/translation="MSLSDTIEDIRYQKLNRSGSDTDREIIQNSEKKLKAFIQASILD
QELLDTYQIAKGIADDNNFDIPISQIEVTKNHMGIPAEKVIIAGIYSDQVIVDFSNN
SDVTQKYRNNGRSYDYDHYMTLCNYYQDATVEGGEGQHQYIIKLPDTLNHEISSFPIR
LNLKIKSKAVPYQNIPIYNIIDFAELNVTVDVDSISIQEGKRSYINECYNQSISDLTDS
LEIKDITVLGSEGTKWSLSIGLVDYFQSPHEHQIVLRMNNELYKIDSTNLRLEHVEMN
PNSFRYYQPPEEQGLQIYHNQPISKNDIGLVDFRDKSVLGFDMELIANGSLVLSYGNSTI
AKVENWSNYQPAREMMFAFNDTMVLIQSA"
/besthit="qcoverage 99.1735537190083 , hcoverage
9.87925356750823 , similarity 90.8 , identity 83.1 ,

```

```

evaluate 1.28e-189 , alnlength 360 , Bacteria ,
Proteobacteria , WP_141456901.1 ankyrin repeat
domain-containing protein [Wolbachia endosymbiont of
Carposina sasakii]"
gene complement(8314..8634)
/locus_tag="wEsol_00245"
CDS complement(8314..8634)
/locus_tag="wEsol_00245"
/codon_start=1
/transl_table=11
/product="hypothetical protein"
/translation="MHHRGLKQTIFIVNEDSDNARIISDLGSTGKMGKNIDVIRVQVA
NITQWGVSKDTEKDSYSLDLLANDTQSIASSTTIDDFKNLVIQVNCQGITESVTIQCL
CLIQ"
/besthit="qcoverage 94.3396226415094 , hcoverage
2.74423710208562 , similarity 92.0 , identity 81.0 ,
evaluate 1.11e-45 , alnlength 100 , Bacteria ,
Proteobacteria , WP_141456901.1 ankyrin repeat
domain-containing protein [Wolbachia endosymbiont of
Carposina sasakii]"
gene complement(8681..9001)
/locus_tag="wEsol_00246"
CDS complement(8681..9001)
/locus_tag="wEsol_00246"
/codon_start=1
/transl_table=11
/product="hypothetical protein"
/translation="MHIPEGSNIRYIGSKNNETIFIINNYMSGTLKGGAGKENTLVMN
VKANNIAANLHSGTIRYGNSSNNIRLVNTYNYVNSDNKQNTTHCETRLINVKKRESL
AEFI"
/besthit="qcoverage 94.3396226415094 , hcoverage
2.74423710208562 , similarity 97.0 , identity 97.0 ,
evaluate 5.84e-53 , alnlength 100 , Bacteria ,
Proteobacteria , WP_141456901.1 ankyrin repeat
domain-containing protein [Wolbachia endosymbiont of
Carposina sasakii]"
gene complement(9059..9607)
/locus_tag="wEsol_00247"
CDS complement(9059..9607)
/locus_tag="wEsol_00247"
/codon_start=1
/transl_table=11
/product="hypothetical protein"
/translation="MPSPHGPGCATQMKWTCdleKKYKDISFDKINIASSVKRDLSSI
DISKILTMTPYTLMSEGWERFICGIKNSHQCYQEIEKKVYVVNTDAKHIPHLTKYE
YENLGLRVVDAPLTNPiQKSQCSKKINTKHTGDDAFAPCNSGKIYRNCQESFTLSGEP
FIFTNPKRKDPGNTKKQTFPRG"
/besthit="qcoverage 100 , hcoverage 5.36556603773585 ,
similarity 98.4 , identity 97.3 , evaluate 2.50e-116 ,
alnlength 182 , Bacteria , Proteobacteria ,
WP_208571528.1 ankyrin repeat domain-containing protein
[Wolbachia pipientis]"
gene complement(9737..10276)
/locus_tag="wEsol_00248"
CDS complement(9737..10276)
/locus_tag="wEsol_00248"
/codon_start=1
/transl_table=11
/product="hypothetical protein"
/translation="MLGVSISPSSKVGKLIGKIPGPARQAFVKVISNPVVSITFATI

```

```

AYQFGYSINEIAQGNHPLNYYWTASSGIKLASMSIRPISAGVSFTIKSVSATTKILR
GLSAGKVLGRAAVVTMVADVLITMGVKIHERMEYTKAIAEQVTLPLPGGEQAEVFFAG
VIKFFTGRDVEKNMKIQLE"
/genehit="qcoverage 94.413407821229 , hcoverage
5.52829571475303 , similarity 98.8 , identity 97.6 ,
evaluate 5.35e-95 , alnlength 169 , Bacteria ,
Proteobacteria , WP_065095480.1 ankyrin repeat
domain-containing protein [Wolbachia endosymbiont of
Nomada leucophthalma]"
gene complement(10251..10394)
/locus_tag="wEsol_00249"
CDS complement(10251..10394)
/locus_tag="wEsol_00249"
/codon_start=1
/transl_table=11
/product="hypothetical protein"
/translation="MMAIYDLLDSIGDTATLGRHNNDAKQVFGINGILDAMDDVRCK
YFS"
/genehit="qcoverage 89.3617021276596 , hcoverage
1.06571936056838 , similarity 100 , identity 97.6 ,
evaluate 1.28e-17 , alnlength 42 , Bacteria ,
Proteobacteria , WP_063631194.1 ankyrin repeat
domain-containing protein [Wolbachia endosymbiont of
Laodelphax striatellus]"
gene complement(10889..11644)
/locus_tag="wEsol_00250"
CDS complement(10889..11644)
/locus_tag="wEsol_00250"
/codon_start=1
/transl_table=11
/product="hypothetical protein"
/translation="MFSFRDFINEEANFQGV LHGAFSYSDLKLEESPRALVLTEFQT
GRGKRIDMLVNGIKFAEGASNAKEYDPVALELKGPREGKTADALVKEANDQINKEYVK
GVTYKTLTDGRKVAFMGVVFDKGASNADSLILPSKNEFTPVKVVHSSIFSFSQCATRK
RRDIGIPCIDSRDEEKVTKKEKKQRVKELFDIDNAKDLTNEIVDIGREQVDFMIGNAD
RTDVYVKVKDNNNGNDKKLIIGDIIEMKNAERYL"
/genehit="qcoverage 98.00796812749 , hcoverage
6.75082327113063 , similarity 92.7 , identity 86.6 ,
evaluate 1.71e-129 , alnlength 246 , Bacteria ,
Proteobacteria , WP_141456901.1 ankyrin repeat
domain-containing protein [Wolbachia endosymbiont of
Carposina sasakii]"
gene complement(12094..12918)
/locus_tag="wEsol_00251"
CDS complement(12094..12918)
/locus_tag="wEsol_00251"
/codon_start=1
/transl_table=11
/product="hypothetical protein"
/pfam="DUF1703"
/translation="MLKHKIKKYLTLVLVIFYEIKKEEEIWKDENDNTKSKPEDYIA
ELTNSDASKVEESSKKVIDRITKVHSHYKGSPTYADKAREAAHHGFIAGALVNFYRHR
NLRVYLEQFAGRGYADIVLVPRGKDRSLNAVPIIIELKAATKEELKELEKGGKVKDGS
QTTSAIALEQAKHYAKSFQPNMTMRVLTISDNVLCGLNLDSTEGEKFSMHISPREDE
IALPTMQALLKEASDWDGRQDTVTNVKEKSSSHWSVFITHFLVRQRKEVITLVDFS"
/genehit="qcoverage 77.007299270073 , hcoverage
25.9852216748768 , similarity 87.2 , identity 75.4 ,
evaluate 1.93e-96 , alnlength 211 , Bacteria ,
Proteobacteria , WP_155968920.1 hypothetical protein
[Wolbachia pipientis]"

```

```

gene      complement(12912..13046)
          /locus_tag="wEsol_00252"
CDS       complement(12912..13046)
          /locus_tag="wEsol_00252"
          /codon_start=1
          /transl_table=11
          /product="hypothetical protein"
          /translation="MLKENLHPDTQQKIGTARGIKDRIKGRVKSCLVQINKNEENIFC
"
          /besthit="qcoverage 100 , hcoverage 1.20680197476687 ,
similarity 84.1 , identity 72.7 , evaluate 5.32e-09 ,
alnlength 44 , Eukaryota , Arthropoda , KAG8290545.1
hypothetical protein J6590_079680 [Homalodisca
vitripennis]"
gene      complement(13110..13472)
          /locus_tag="wEsol_00253"
CDS       complement(13110..13472)
          /locus_tag="wEsol_00253"
          /codon_start=1
          /transl_table=11
          /product="hypothetical protein"
          /translation="MLSQEKPDQDFELIELLIRETAGVSQPGPSTSTQQKSDFESFKAR
FQSYIDQVPSYLHSVKGEGFFSHFFLGFSILPDTQIAERLGDKKVYFRFATAKTLKV
VVKNSQIKSDVDAIEGI"
          /besthit="qcoverage 97.5 , hcoverage 3.43713278495887 ,
similarity 89.7 , identity 88.9 , evaluate 5.11e-57 ,
alnlength 117 , Bacteria , Proteobacteria , NGZ20114.1
hypothetical protein [Wolbachia pipientis]"
gene      complement(13501..14022)
          /locus_tag="wEsol_00254"
CDS       complement(13501..14022)
          /locus_tag="wEsol_00254"
          /codon_start=1
          /transl_table=11
          /product="hypothetical protein"
          /translation="MFNFDQFQKLFDCLKPSDVVLGSYYCTWLRNIKLGGCSGQYLN
V
GAKLLMHMLMKDGFDSHRTLALNGEVMNNSTFQGSLLVPLVEKGCMQVWAILDKTNS
KQIEEFMSSMRAGYICSIQGDHASLNKFLSYSGSVDDLDQKSIPGPSGLSDVKL
NKMHDKSHIRLGE"
          /besthit="qcoverage 100 , hcoverage 39.5881006864989 ,
similarity 90.8 , identity 79.2 , evaluate 5.59e-91 ,
alnlength 173 , Bacteria , Proteobacteria , OAM06474.1
hypothetical protein TV41_04045 [Wolbachia endosymbiont
of Dactylopius coccus]"
gene      complement(14037..14177)
          /locus_tag="wEsol_00255"
CDS       complement(14037..14177)
          /locus_tag="wEsol_00255"
          /codon_start=1
          /transl_table=11
          /product="hypothetical protein"
          /translation="MKIAVHAHDNGYPDVFEFCLSQINPDRYPELLKRDLEKNGYYG
SL"
          /besthit="qcoverage 100 , hcoverage 10.6728538283063 ,
similarity 97.8 , identity 93.5 , evaluate 2.46e-22 ,
alnlength 46 , Bacteria , Proteobacteria , WP_172758421.1
hypothetical protein [Wolbachia endosymbiont of
Diaphorina citri]"
gene      complement(14233..14706)
          /locus_tag="wEsol_00256"

```

CDS complement(14233..14706)  
 /locus\_tag="wEsol\_00256"  
 /codon\_start=1  
 /transl\_table=11  
 /product="hypothetical protein"  
 /translation="METINTGNLPFFLDILSDEECWEKTDTIHGIKLNRRIVAKKMIE  
 PKSWKGTNNPLDDFDYQIACWCCLEEDIITLFEHFKREDEIKDGDSDALKKLVKSVS  
 GSWYTDAMMQFWSYFVSGYIAELDLKDQHPYVLGLHRAAISMRKRVRSSRVLLE"  
 /besthit="qcoverage 94.9044585987261 , hcoverage  
 34.5707656612529 , similarity 97.3 , identity 88.6 ,  
 evalule 9.40e-94 , alnlength 149 , Bacteria ,  
 Proteobacteria , WP\_168456002.1 hypothetical protein  
 [Wolbachia endosymbiont of Ctenocephalides felis wCfeJ]"

gene 15485..16027  
 /locus\_tag="wEsol\_00257"

CDS 15485..16027  
 /locus\_tag="wEsol\_00257"  
 /codon\_start=1  
 /transl\_table=11  
 /product="hypothetical protein"  
 /pfam="Pfam-B\_5326 LRR\_6 LRR\_4 LRR\_6 LRR\_4 LRR\_6 LRR\_4  
 LRR\_6 LRR\_4"  
 /translation="MDFKQYVKGDTLLLSSDAINISDLVSFLERNQSITRLILSFSKI  
 GNEGAKILASGNLPNLTSLHLFCNNISAEGAEALAKGNLLNLASLHLLFNKIGDEGVK  
 ALANGNLTKLTSRLVANKIGNEGAKALANSNLPNLKLLYLGNHLDTKSVKALLATNN  
 VRNLLSPELAITLVIKVQKL"  
 /besthit="qcoverage 36.1111111111111 , hcoverage  
 39.1566265060241 , similarity 72.3 , identity 60.0 ,  
 evalule 1.12e-11 , alnlength 65 , Bacteria ,  
 Proteobacteria , WP\_226080053.1 hypothetical protein  
 [Wolbachia endosymbiont of Tribolium confusum]"

gene 16102..16884  
 /locus\_tag="wEsol\_00258"

CDS 16102..16884  
 /locus\_tag="wEsol\_00258"  
 /codon\_start=1  
 /transl\_table=11  
 /pfam="LRR\_8 LRR\_6 LRR\_4"  
 /product="hypothetical protein"  
 /translation="MAKDNLPNLTSGLSCNNIGNKGAEALANVNLTKFTKLDLFGNN  
 IDFEHIEVLARSQCSGIKLGDRDQKVYDFLLKKCSNNQVVDEESIKRMIFSVARSNH  
 SGDLVRYILTQPDKYFPLINSKDEQGHFYNHSPEIQEFLFKHGLVSEKDESTLRN  
 ITNDKQSVHAGLAVKKTKFITKNLVESIKASEGQLEQAVNSYVENIGLLKQYQNDPIR  
 LRLLSLTNNEKKVRWKKHYVRLILRQVMKNLLRLLLIKPSKH"  
 /besthit="qcoverage 63.8461538461538 , hcoverage  
 34.8008385744235 , similarity 72.3 , identity 55.4 ,  
 evalule 2.35e-47 , alnlength 166 , Bacteria ,  
 Proteobacteria , WP\_175937404.1 leucine-rich repeat  
 domain-containing protein [Wolbachia endosymbiont of  
 Madathamugadia hiepei]"

gene 16921..17295  
 /locus\_tag="wEsol\_00259"

CDS 16921..17295  
 /locus\_tag="wEsol\_00259"  
 /codon\_start=1  
 /transl\_table=11  
 /product="hypothetical protein"  
 /translation="MTKGISTNRMQYDYTRGSERFITIPESIGYIKLLIDDFSVPKE  
 KKELLVTLMEQNPDLVKNKLSKVKEKLGNSVILDKEQFNKTELHGLLDGIDGKKVDE  
 LFKEISCLNIEEVWREQKNLFS"

```

/besthit="qcoverage 95.1612903225807 , hcoverage
15.7965194109772 , similarity 92.4 , identity 84.7 ,
evaluate 3.47e-54 , alnlength 118 , Bacteria ,
Proteobacteria , WP_153295431.1 hypothetical protein
[Wolbachia endosymbiont of Armadillidium vulgare]"
gene 17244..17627
/locus_tag="wEsol_00260"
CDS 17244..17627
/locus_tag="wEsol_00260"
/codon_start=1
/transl_table=11
/product="hypothetical protein"
/translation="MFEYRRGLERAKEFILLKQIYIAATTYGENSSACIQGTWSQIIG
SINEISSEVVAQYDRYLEEEQRREMOKDAITEENINPFLEGLANKLIQHVELNPKE
TLEDFVVCTVDIDKPEEITFNSKKF"
/besthit="qcoverage 90.5511811023622 , hcoverage
25.5555555555556 , similarity 91.3 , identity 79.1 ,
evaluate 1.57e-53 , alnlength 115 , Bacteria ,
Proteobacteria , WP_191111036.1 hypothetical protein
[Candidatus Wolbachia massiliensis]"
gene 17747..18100
/locus_tag="wEsol_00261"
CDS 17747..18100
/locus_tag="wEsol_00261"
/codon_start=1
/transl_table=11
/product="hypothetical protein"
/translation="MQSFVQPGQEPFNLQENITGENVPSIPGKLQPSKPSEKRSKLPI
VTASALAIAGVVSGIAIAVYLEMLAVGIAVGACCLVAAAIYYCNRPSSSLGNSNVQG
SCKEVQEPHSEGKKK"
/besthit="qcoverage 69.2307692307692 , hcoverage
94.1860465116279 , similarity 84.0 , identity 76.5 ,
evaluate 6.41e-29 , alnlength 81 , Bacteria ,
Proteobacteria , MBA8758310.1 hypothetical protein
[Wolbachia pipientis]"
gene complement(18181..19170)
/locus_tag="wEsol_00262"
CDS complement(18181..19170)
/locus_tag="wEsol_00262"
/codon_start=1
/transl_table=11
/pfam="HTH_31 HTH_19 Pfam-B_3762 HTH_3 Pfam-B_12708
HTH_31 HTH_19 HTH_3"
/fullproduct="qcoverage 93.0091185410334 , hcoverage
98.7096774193548 , similarity 95.8 , identity 90.5 ,
evaluate 2.72e-186 , alnlength 306 , Eukaryota , Arthropoda
, GFS56378.1 putative transcriptional regulator [Nephila
pilipes]"
/translation="MTNDTKLTDYEVGKKLKHREKKRYTQAGLGSKVGVLEKQMSRY
ERGENPISIIIFCMIVVELMIDMAKLLPESTISEKIEGKTLNLVRECKKFRNQELCKM
ASALNKSIIQMGEEGKKAGKIKVAKNLLKAGISLDIILQTTGLSKDELEKHNKTEIVN
FIAYKTGENMKDWRLARGRSEEDLGNEVGLTGGQIRRYEQGTHIMTIGKLCNTADELS
THAKTLLAKISELIEKGNVEIERSNEDREGENGVLDLVREYNKIDDQEIFRDKFYSLIM
SVSKRIQIDKEKGKKIGRTEMAKNLLEVGVPINVVHQATGLKNLKASDMLGEP"
/product="putative transcriptional regulator"
/besthit="qcoverage 93.0091185410334 , hcoverage
98.7096774193548 , similarity 95.8 , identity 90.5 ,
evaluate 2.72e-186 , alnlength 306 , Eukaryota , Arthropoda
, GFS56378.1 putative transcriptional regulator [Nephila
pilipes]"

```

gene complement(19242..19541)  
/locus\_tag="wEsol\_00263"

CDS complement(19242..19541)  
/locus\_tag="wEsol\_00263"  
/codon\_start=1  
/transl\_table=11  
/product="hypothetical protein"  
/pfam="RadC"  
/translation="MEQGVRIEASSMVVSHNYPEREAPTEGDISIVRKLVACPSVGI  
DLVDYKTVTEYGCFSFNGLIREGCKILWKDEVVWKDDKEYKNAIREDNYKVEKLH"  
/besthit="qcoverage 61.6161616161616 , hcoverage  
26.9911504424779 , similarity 73.8 , identity 45.9 ,  
evaluate 8.45e-07 , alnlength 61 , Bacteria ,  
Proteobacteria , WP\_168464812.1 DNA repair protein RadC  
[Wolbachia endosymbiont of Ctenocephalides felis wCfeT]"

gene complement(19526..19663)  
/locus\_tag="wEsol\_00264"

CDS complement(19526..19663)  
/locus\_tag="wEsol\_00264"  
/codon\_start=1  
/transl\_table=11  
/product="hypothetical protein"  
/translation="MEQSDKEHLRVFYMDKHYLLVEEVYDVFKIDKKRYIRESLSK  
G"

gene complement(22340..22720)  
/locus\_tag="wEsol\_00265"

CDS complement(22340..22720)  
/locus\_tag="wEsol\_00265"  
/codon\_start=1  
/transl\_table=11  
/product="hypothetical protein"  
/pfam="RadC"  
/translation="MTINKKGIQVVYMDAECKTITENTYGYECIETVQSVMEQILMKE  
AITSIKITHYLTTSSEPLKDDMEIAKDLVLILPNIGVELKDYIMVTQSGYVSLIEQGLT  
KQVKVNFVGCNRTLHTQLRAMVTT"

gene complement(22775..23728)  
/locus\_tag="wEsol\_00266"

CDS complement(22775..23728)  
/locus\_tag="wEsol\_00266"  
/codon\_start=1  
/transl\_table=11  
/pfam="Pfam-B\_12980 Ank\_2 Ank\_4 Ank\_5 Ank Ank\_3 Ank\_4  
Ank\_5 NMT1\_2 Ank Ank\_4 Ank\_2 Pfam-B\_10896 Ank\_5  
Pfam-B\_11730 Pfam-B\_1873 Ank Ank\_3 DUF3447 Ank\_4 Ank\_4  
Pfam-B\_1873 DUF3447 Ank\_2 Shigella\_OspC Ank\_4 Ank\_5 Ank\_3  
Ank Pfam-B\_10896 Ank\_5 Ank Ank\_3 Ank\_4 Ank\_5 Ank\_4 Ank\_2  
Ank Ank\_3"  
/fullproduct="qcoverage 100 , hcoverage 111.619718309859  
 , similarity 80.1 , identity 78.9 , evaluate 1.14e-74 ,  
alnlength 317 , Eukaryota , Arthropoda , GFQ64082.1  
ANK\_REP\_REGION domain-containing protein [Trichonephila  
clavata]"  
/translation="MCNIIIEKYLVDKKDVNVKNDKGNTPLHLAVEEGNLEAVKHLEK  
GADSNADQYRCTPLCIAAKKGNLYLTAYILIEGADLNAQDEGSWTPLYAVYSGNID  
IVRFLINQGANYNITDNESTPVYYAFQYGHVRIVKYFVEEKSIDPMAPINEYGSTLFG  
EAIVGGDLDTIEYLMSRKDVITYDCNDLLEIAILNGHLDVVEYLVEEKGVDFNVFVGENG  
WTPLLNAVERDNVEVVEYLLIEKGAYVNATTEDGTIGLHIAAEHCNFYMKCLVINGAN  
INARGKRDNTPLYLATQDSEYQDKDIKEDVKEYLISGAHI"  
/product="ANK\_REP\_REGION domain-containing protein"  
/besthit="qcoverage 100 , hcoverage 111.619718309859 ,

```

similarity 80.1 , identity 78.9 , evalue 1.14e-74 ,
alnlength 317 , Eukaryota , Arthropoda , GFQ64082.1
ANK_REP_REGION domain-containing protein [Trichonephila
clavata]"
gene      complement(23890..24114)
          /locus_tag="wEsol_00267"
CDS       complement(23890..24114)
          /locus_tag="wEsol_00267"
          /codon_start=1
          /transl_table=11
          /fullproduct="qcoverage 105.405405405405 , hcoverage
98.7341772151899 , similarity 87.2 , identity 78.2 ,
evalue 2.28e-28 , alnlength 78 , Eukaryota , Arthropoda ,
GFQ64080.1 ANK_REP_REGION domain-containing protein
[Trichonephila clavata]"
          /translation="MSNNNNNNRESVLARLLSKTPEQLKLYCKLLDNEKRQDLYQKVLK
EMRKNQEINQLKKLNEVAAVIEEAIEEGRK"
          /product="ANK_REP_REGION domain-containing protein"
          /besthit="qcoverage 105.405405405405 , hcoverage
98.7341772151899 , similarity 87.2 , identity 78.2 ,
evalue 2.28e-28 , alnlength 78 , Eukaryota , Arthropoda ,
GFQ64080.1 ANK_REP_REGION domain-containing protein
[Trichonephila clavata]"
gene      complement(24229..24471)
          /locus_tag="wEsol_00268"
CDS       complement(24229..24471)
          /locus_tag="wEsol_00268"
          /codon_start=1
          /transl_table=11
          /product="hypothetical protein"
          /translation="MGVALLVSSVVAYILKMYAIAVIGGIVGLACVSYALYNALKPGT
KLEKVEDVERIDEKPLPSLCRKCSIEANIFTIINNK"
          /besthit="qcoverage 72.5 , hcoverage 42.3357664233577 ,
similarity 93.1 , identity 84.5 , evalue 2.34e-19 ,
alnlength 58 , Eukaryota , Arthropoda , GFT52245.1
uncharacterized protein TNCV_4275591 [Trichonephila
clavipes]"
gene      complement(24453..24767)
          /locus_tag="wEsol_00269"
CDS       complement(24453..24767)
          /locus_tag="wEsol_00269"
          /codon_start=1
          /transl_table=11
          /product="hypothetical protein"
          /translation="MPANACEIVTEVCSFDVEHKPVIDKATTDGTGLCEDVNKSSEGLQ
PICENSEKVQQTTSVKTDEQESNASNDLSPKPRFDDNATDKREKPLTTQAVISGSVWVW
RY"
          /besthit="qcoverage 96.1538461538462 , hcoverage
40.3225806451613 , similarity 58.0 , identity 38.0 ,
evalue 4.31e-06 , alnlength 100 , Bacteria ,
Proteobacteria , WP_174134220.1 hypothetical protein
[Wolbachia endosymbiont of Atemnus politus]"
gene      complement(24791..25285)
          /locus_tag="wEsol_00270"
CDS       complement(24791..25285)
          /locus_tag="wEsol_00270"
          /codon_start=1
          /transl_table=11
          /product="hypothetical protein"
          /pfam="PAZ_siRNAbind PAZ_siRNAbind PAZ_siRNAbind"

```

```

/translation="MPAVKDLLLEEAKKQKLLKEVLNERNDYKTFRWSEETHILTDAI
SRDNDIMRVVLKISEENGILKDILKKRIIIKHS DGEEMIYTPFTYAEECENSEAVEE
ILKFSRELGDVLNKRRTTIEQQAPFLT VVTETATNASTTTAPCDEDSLSLMQQQLQNIK
ILLL"
/besthit="qcoverage 61.5853658536585 , hcoverage
34.1216216216216 , similarity 79.2 , identity 74.3 ,
evaluate 9.05e-35 , alnlength 101 , Eukaryota , Arthropoda
, GFQ79632.1 uncharacterized protein TNCT_539301
[Trichonephila clavata]"
gene complement(26741..27127)
/locus_tag="wEsol_00271"
CDS complement(26741..27127)
/locus_tag="wEsol_00271"
/codon_start=1
/transl_table=11
/fullproduct="qcoverage 99.21875 , hcoverage
91.3669064748201 , similarity 99.2 , identity 98.4 ,
evaluate 3.77e-85 , alnlength 127 , Bacteria ,
Proteobacteria , WP_182183014.1 nucleoside deaminase
[Wolbachia pipientis]"
/cog="CumB COG0590 152 Cytosine/adenosine deaminases"
/pfam="dCMP_cyt_deam_1 APOBEC_N MafB19-deam"
/tigr="TIGR00326 eubact_ribD 343 riboflavin biosynthesis
protein RibD"
/product="nucleoside deaminase"
/translation="MELAIEQAKLAQKNDEVPICAVIISGSNVVSSAHNISNDPTAHA
EMLAIKQACELLSTSTLYDSDIYVTLEPCPMCAQAISFARIKRLYFGAYNPKGGGIEN
GAKIFQFCSHIPEVYGGILETECSFC"
/besthit="qcoverage 99.21875 , hcoverage 91.3669064748201
, similarity 99.2 , identity 98.4 , evaluate 3.77e-85 ,
alnlength 127 , Bacteria , Proteobacteria ,
WP_182183014.1 nucleoside deaminase [Wolbachia
pipientis]"
gene complement(27170..28774)
/locus_tag="wEsol_00272"
CDS complement(27170..28774)
/locus_tag="wEsol_00272"
/codon_start=1
/transl_table=11
/fullproduct="qcoverage 100 , hcoverage 100 , similarity
98.7 , identity 97.6 , evaluate 0.0 , alnlength 534 ,
Bacteria , Proteobacteria , MBV2146595.1 CTP synthase
[Wolbachia endosymbiont of Pissodes strobi]"
/cog="PyrG COG0504 533 CTP synthase (UTP-ammonia lyase)"
/pfam="CTP_synth_N GATase Peptidase_C26"
/tigr="TIGR00337 PyrG 526 CTP synthase"
/product="CTP synthase"
/translation="MKEAKFIFVTGGVVSSLGKGLVASSVGALLQAYGFKIRIRKLDP
YLNIDPGTMNPTQHGEV FVVTEDGGETDLDLGHYKRFTGIKATKDDNITTGKIYHELLK
KERRGDYLGKTVQVIPHV TALIKLFIFNSTEGLDFIICEIGATVGEIESQPFLAIRQ
VNYTLGKQRVILIH LTLIPYLTA AQELKTKPTQHSVRELNSAGLQPDII LCRSEKEIF
DNQREKIAKLCNVSLSSVIPAPDVSHIYELPMLYSQCGLDTQILEHFH LSEP KPSLIE
WDQIVHSTRHPTQEVTVSIVGKYTEFPDAYKSLVEALNNGAISNKVKVKINWVNSREK
EEKPINEKLIGEK LQNSHAILVPGGF GHDGVESKILAINYARTNNIPFFGICLGMQLA
IIEFARNVVKLEDAHSEEFHNCKHPIVKLAGDQDDDLGGTMRLGAYKCNINASSKMMD
AYSNTTISERHRHRYIINS DYKDDLEKNGLCSGIS EDGTCIEAVELESHPWFIGVQF
HPEFQSKPFPSPHPLFISFIKAAVNKI"
/besthit="qcoverage 100 , hcoverage 100 , similarity 98.7
, identity 97.6 , evaluate 0.0 , alnlength 534 , Bacteria ,
Proteobacteria , MBV2146595.1 CTP synthase [Wolbachia

```

gene                   endosymbiont of *Pissodes strobi*]"  
                       complement(28774..29139)  
                       /locus\_tag="wEsol\_00273"  
 CDS                   complement(28774..29139)  
                       /locus\_tag="wEsol\_00273"  
                       /codon\_start=1  
                       /transl\_table=11  
                       /fullproduct="qcoverage 86.7768595041322 , hcoverage  
                       99.0566037735849 , similarity 96.2 , identity 96.2 ,  
                       evaluate 3.25e-50 , alnlength 105 , Bacteria ,  
                       Proteobacteria , WP\_010962615.1 MULTISPECIES: preprotein  
                       translocase subunit SecG [Wolbachia]"  
                       /cog="SecG COG1314 86 Preprotein translocase subunit  
                       SecG"  
                       /pfam="SecG"  
                       /product="preprotein  
                       translocase subunit SecG"  
                       /translation="MYFMLIKFLFSSLSIISVAVLSIFQVILVVVLVILVLLQPPGSS  
                       SLSGFSNTQQGVNSMIPVKSSNPISRITAIVDGLFIINTLLLSGLYSKDVHKKSI  
                       KIILEKKQESEPTSVPFEN"  
                       /besthit="qcoverage 86.7768595041322 , hcoverage  
                       99.0566037735849 , similarity 96.2 , identity 96.2 ,  
                       evaluate 3.25e-50 , alnlength 105 , Bacteria ,  
                       Proteobacteria , WP\_010962615.1 MULTISPECIES: preprotein  
                       translocase subunit SecG [Wolbachia]"  
 gene                   29239..29646  
                       /locus\_tag="wEsol\_00274"  
 CDS                   29239..29646  
                       /locus\_tag="wEsol\_00274"  
                       /codon\_start=1  
                       /transl\_table=11  
                       /product="hypothetical protein"  
                       /pfam="Hexapep Pfam-B\_7219 Pfam-B\_411 Hexapep Hexapep  
                       Hexapep"  
                       /tigr="TIGR02287 PaaY 192 phenylacetic acid degradation  
                       protein PaaY"  
                       /translation="MYHILKYKDYEPKIGERAFIGGSHIIGKVEIGKDASIWFNCV  
                       RGDVGSIKIGDGTNIQDGTVIHVDRNPGDATTIGNMVTVGHFCLHACMVHDKAFIGM  
                       GSTVMDHAVVEPEAMVAAGSLVTHGKVIKSGEI"  
                       /cog="PaaY COG0663 176 Carbonic  
                       anhydrases/acetyltransferases, isoleucine patch  
                       superfamily"  
                       /besthit="qcoverage 100 , hcoverage 78.9473684210526 ,  
                       similarity 98.5 , identity 98.5 , evaluate 1.01e-91 ,  
                       alnlength 135 , Bacteria , Proteobacteria , MBV2146597.1  
                       gamma carbonic anhydrase family protein [Wolbachia  
                       endosymbiont of *Pissodes strobi*]"  
 gene                   complement(30043..>30551)  
                       /locus\_tag="wEsol\_00275"  
 CDS                   complement(30043..>30551)  
                       /locus\_tag="wEsol\_00275"  
                       /codon\_start=1  
                       /transl\_table=11  
                       /product="hypothetical protein"  
                       /pfam="tRNA-synt\_1b MazG"  
                       /tigr="TIGR00233 trpS 328 tryptophan--tRNA ligase"  
                       /translation="NNHYKLDYFIVPEILTDCTSRIMSLRDSTSKMSKSDPSEYSCI  
                       NLDDTDDLIVKKIEKAKTDSIIGFDFATLECRPEISNLINIYSVLSNVNAEKVCEEVN  
                       KHDMKHFKKELADLIISVISPIRERMNDLLKQDFHLREILKKGTKKAAEIATHNIKEM  
                       KDIIGFAQ"

/cog="TrpS COG0180 314 Tryptophanyl-tRNA synthetase"  
 /besthit="qcoverage 100 , hcoverage 50.6024096385542 ,  
 similarity 99.4 , identity 98.2 , evalue 3.66e-109 ,  
 alnlength 168 , Bacteria , Proteobacteria , MBV2146598.1  
 tryptophan--tRNA ligase [Wolbachia endosymbiont of  
 Pissodes strobi]"

ORIGIN

```

1  tatattccaa ttctacaaac tttccagggtg tttctttttca gcgtctctat catcacctga
61  ttattttgtga ggcgtatatgt aatctcctcc tcttactaag ctttactgct gattcttaat
121 atagcaataa ctcatctatt tttatcactc tactccagag tgaactcaat aatagcggtc
181 atcacgtgct tatagatcaa caggctgctc gtcataattaa taccctgtca acatatatac
241 tagacacaaa acgttttctaa acttatattc tttttctatg ataattttcc tcatatcctg
301 ccgtaatat tttccttaat tctctcagat attccggact atgtctgcca tattcgctctc
361 taattcctta atttaaaaat tcaactctct atattcacct gactcgtgaa ggatcatcag
421 caaatgtttc actaccactc tctatcggtg gcattgatcg cctgactatt atattgcact
481 ttattctcta tcaactcatc caaatcatat agctcacgca tcagattagc actgaacgct
541 aaataagtag ttcttatgct ttcttcagga gcatagatgc agatatctaa cttccgctta
601 atgtggcctt tttaatgacc actcgttttc caagcatttt ctactaagct acttactata
661 tcaatagttt cttctatcgc cctaacagcc atccgttact caactcttta gctgatctat
721 atccgcctct atgaatttct aggtgtattt gttaacttca ttatcacctc gctataaaga
781 ctttggttga tcctcgctac taatactgca cagcaatgct ctttagggtt gcttggaagt
841 tttagatcaa gttgtactaa catacgcgcg tgtgtttgtg caaaatgct acacgcttta
901 atcattatag cagattttta gtgaaagtaa actgagatag cctgcatatc tccaatatat
961 aggtcagtct actcgagact gctataatcc atggcatcca tttcactagc cttttaagat
1021 ctactttaca gatagggtt gatacaaaaa gcggacgtcg tctaacgtag cagaatgcct
1081 tctatactct aagatgcata tcatgacagc cgtttttctaa cgcattacaa aaaactaaaa
1141 aaacttgaac attgcttcag aattgcgagt ccataatcta taatgcactt tctactcggt
1201 tagttactgt tattcggtc tgtcttccta agtttctcga tccgcgaatg agatatgatg
1261 tcgtcgcctt ttgcctcgt ttatctagct agggtcgtcg atgaactgtc gttcagccta
1321 tttattctag cagctttcgc gtaggactga tcctcttggt gtgtctcaca ataggcctac
1381 aatccataat tccatgccat aaacgttcca cgctcactcg cctcgattca aaaccgcagc
1441 actccgcctc tacgctattc ctacgagtat tacgttacca aagttctaata tataacatat
1501 tctactgagt gatcgccttt ccggttttga tacctattct gtcgtctgca tatagaccca
1561 gcgtttttgtg atatccatcg ctactccact tcttccaccc aaacccttac tttgccttcc
1621 tggctcgcac taagttgtac tgtcttacct tcttttccac ccaatgttgt tacgtattga
1681 actttcgacc agagttccct atcctaaagt agtttaccca ccctctcaca tatcggattg
1741 aggtcatgta tcaactctttt tatcggttgc gatttatagc gccgaaatat tccttcaact
1801 tgcgtagcag gttgttcgtg tctttcatct gcgtgttttc ctgacattcc actttccttg
1861 tcttgtgatc tcttgaaaat caaacctagg taagctaaat gttctccttt ctttaggtga
1921 tgacttttgt cttttcttca tttacgctca cttctagttt tgctaattct tctccaacct
1981 tctgtatact gctctttcta gccattcgt ttaggggtgt cactaatcag tatcactaaa
2041 tcgtctgccc atctggcata ttccatacgt tggtaacttc cttctttggg cacctctttt
2101 gctttctcca atattttatc tacatcattt aggtatatat tgcttagtag tggcggaaag
2161 tgggtatcct tgtgctattc ctcgttttcc tcctgtttga ggattagctt aatcatgcgc
2221 atgttttctt tgtcatttat tcttttggca atcatttctc catcagaatt tcctccagat
2281 ttggatattc ttctccgggt tcctatttgg gctatagggtc ttggttatta gttcgtgtct
2341 tatttgttga agatactttt ctaagccttc tgccctctatc gattcgaatg tcatccatct
2401 attcctggtg caccattact cttctttgtt agcttatatg cttcttccag tgtctcccat
2461 cttgcagacg tgaacataga ttccccagaa tcgccattcc ggttctgctt tcgctttgat
2521 ttcttctcag gtcttgtaat tttattgtcg ttttttatat catttttacc tttaccttcc
2581 ttttgttaaa agatttctac tagcagggtg tctttgctcc atgagcgtaa cctcacttct
2641 tcaactactac gcacccatcc gccaccctct catctcggtt cacttctctgt tttccagtta
2701 tagaacctat ctccaaggta tttctccttg ggatgagggg gggcttctcc agttgctttg
2761 tatgtctcat tgccatgccg ttactaacac ccgctgaag tagaccaatc gtttcattcg
2821 tttttcgtct ggtctattct gtcttcgcaa gtaccaagat ggctcgacct tcagaatatt
2881 tctttcgagg caatctgtgt tattcgcttt cgctacggcc tggtaattcg ccattttcct
2941 acgataatgt tgtcggtagg cttaaacatt ttggtttccc tctatgctgc taccgaagct
3001 acaggattcc gacttttatc ctgcgtaggt ctataccta ctgaacaata ctcaactctc
3061 tggacgcact tgggtactgaa aagaataaag acatcctcat tcacttctct aatgatattc
3121 tgggttttac tggcaaaaat gcaatacagg atatagagtt ttaagtact attcaagacc

```

|      |             |             |             |             |             |             |
|------|-------------|-------------|-------------|-------------|-------------|-------------|
| 3181 | ctgatattgc  | ctctaaaaag  | caaagtattg  | ttgatgtcct  | ctgtagagat  | tccactgggg  |
| 3241 | ccagatacgt  | gattgagatg  | caacttgctc  | gtgataaagg  | cttcgaaaaa  | acgagctcaa  |
| 3301 | ttatatgctg  | ctaaggctta  | ctcaaggcag  | gctgataaag  | gtgggttaagt | aacattgatt  |
| 3361 | taaagaaggt  | tttcttttatt | gctattttcca | attgtaaatt  | atttcctgat  | agcctgatta  |
| 3421 | tatatctagc  | cataccataa  | gagatgaaaa  | actaacgagc  | atgacttaaa  | agatttttcaa |
| 3481 | tttatcttca  | ttgagttgcc  | aaaattttcct | aaaaatagag  | aagagcagct  | agaaaaatgta |
| 3541 | gtagatcggt  | ggctattttt  | tttcaaatac  | gcagaagaaa  | acaactgatg  | gaagatttga  |
| 3601 | gaaaaatagc  | agaaaaaatc  | accaataata  | aagctagcat  | atgatgaatt  | agataatggt  |
| 3661 | cattggaagg  | agaaggacct  | agtggcttat  | gaagaaagag  | ttaatggatt  | tacagaaaga  |
| 3721 | agctgctatc  | ttagaacaaa  | aaactcgatg  | atgctaaact  | agaaaggtag  | acaagaaggt  |
| 3781 | atccaaattg  | gccgtgaaaa  | aggtagagct  | gaaggtaagg  | aagagggtgg  | aaaaacagac  |
| 3841 | taaaatagct  | gttgccaaaa  | actcactcaa  | ggccggtgtc  | tgtattgatg  | ttatcgctga  |
| 3901 | aattaccggt  | ctctctcatt  | ctgaaatttt  | gcaactcaaa  | gaaaaaacat  | aataattccta |
| 3961 | cttattcact  | ttaacattta  | taaaaacctt  | ttctaagtta  | gacatgtccc  | ctaattaaga  |
| 4021 | atatagtga   | ctgtctaaaa  | cagctatgaa  | gattgcacac  | agaattatat  | aaattactat  |
| 4081 | cataacgtta  | cccaaacttc  | tatatcaaag  | ctacgtgctg  | tatgtttaat  | atggatagta  |
| 4141 | tattaaccat  | ttattcccca  | actctagtct  | tgtattccta  | cttcattcat  | gttagtatta  |
| 4201 | gaaccatcaa  | acttgctact  | ggtataccta  | attattttgt  | ggctaataatt | gccaccttca  |
| 4261 | ctttaaattt  | tccactactg  | gcatattata  | gctccacctc  | ttatattata  | acctacctat  |
| 4321 | tgagattacc  | tccaagcttg  | gttactccta  | tctcagaaag  | caagttgata  | cttctgagtg  |
| 4381 | gctgtgaact  | gacctaagca  | catctactaa  | gaagaagctg  | aatcatatct  | aagttacctt  |
| 4441 | cttgagcagc  | acagtgtaaa  | ggcgtagaac  | catacatatc  | ttgagcatta  | atattagcac  |
| 4501 | cataataaag  | aaggagactc  | actacattca  | attttcctga  | ttgagtagcg  | aaaaaaattg  |
| 4561 | gtgtataacc  | aaaattgtct  | tgagcttcaa  | tattagcatt  | ataatcatca  | caaagaaggt  |
| 4621 | ttattttgct  | cagatcacct  | gcttcggcag  | caagatgtaa  | gggtgttcta  | ccaagttcgt  |
| 4681 | cttgaacctc  | aatgttatta  | ctatttgga   | tttctaaaga  | cgtagaattt  | ccttgtaagt  |
| 4741 | tacttatcaa  | atctgtatta  | tgtattttac  | caaggtagtt  | tattacatta  | gaataaccac  |
| 4801 | cacaagaagc  | ataatataga  | ggcgcccagc  | caccatgatc  | tttaattatta | acatcaattt  |
| 4861 | tttcttcgtc  | tataaaatat  | tttactatat  | ctagtttacc  | attgtaagca  | gcatactgaa  |
| 4921 | ggggaattct  | accactatta  | tctttaattt  | ttaaactact  | tttttcacct  | accacaagat  |
| 4981 | attttactac  | atttagctcg  | cccccataag  | cagcacaaatg | cataagagtt  | cggccatcgc  |
| 5041 | tatacttagc  | acttaagcta  | gctctttgac  | ttacaagatc  | ttcaactttg  | ctaagatttc  |
| 5101 | catattgtgc  | tgcaatcaat  | aattcctttat | ctaattgcac  | tcgtttttaa  | tactctacaa  |
| 5161 | tattattgtg  | tttttgatca  | gtagcaatat  | ccagcaatgt  | tttaccgcct  | ttgtcttgag  |
| 5221 | tgtaaacgtc  | agccccctta  | tctacgaggt  | accttactaa  | atccatcatc  | aatgctcatt  |
| 5281 | cctttgctga  | gaaaaaaatc  | tataatgtct  | ttgttattgt  | tttcagcggc  | aatgtgtata  |
| 5341 | ggattttctgc | caaaaatggt  | ctcagcggtta | atatcagcac  | ccttttctat  | taaaaagtta  |
| 5401 | gcaacttcta  | acaagcctct  | ccatgcagca  | aaatgtagcg  | gtgtccaacc  | atttttatca  |
| 5461 | gtatcattaa  | tatcaacaca  | tttgctaata  | aggtagctta  | gtatatttaa  | atgaccacta  |
| 5521 | taagcggcat  | tacatgtagg  | gggaccacaa  | taatgatctt  | cagcctttta  | actaacaccc  |
| 5581 | ttttcaacaa  | ggtacttaat  | tatgccaaaag | tgacctttta  | atacagcatt  | gcgtgcagga  |
| 5641 | gtattacat   | ctctgtcttc  | agtattaaca  | ttagctcctt  | gattaacaag  | gcctgttact  |
| 5701 | tcactaatat  | tgtcaatttt  | tgtggcattc  | aacaatgcgt  | aatccaattg  | tacttgctt   |
| 5761 | gaaactatta  | aattagaact  | agcatctgca  | tttctcactt  | ttcttaaagt  | agatccacaa  |
| 5821 | tcttcaatca  | tccacatccc  | ttgtgaaacc  | tgacctcctg  | gaatccaaaa  | aaatactcta  |
| 5881 | cgcctatcat  | tgtcatattt  | agcataatca  | gcagcatata  | aatattcatt  | aagctcaaca  |
| 5941 | ttcattatag  | aacagctgtt  | accatcaggt  | ttaaccgtcc  | acaaatctcg  | tacaactctt  |
| 6001 | cctcctggaa  | tccaagtaaa  | taccattcgc  | ctatcatcat  | tataatttaa  | atagttactg  |
| 6061 | gcagcataca  | aagtttcatt  | aaatgcaaca  | ttcactatat  | aaaagttgtc  | accatcaggt  |
| 6121 | ttaatcgctc  | acctaaactt  | atcatttttt  | catccttttg  | aatccaagta  | aataccgttc  |
| 6181 | ttcttttgct  | accataatca  | tcgaaacatc  | ggtttagcagc | atataaatat  | tcaccttgat  |
| 6241 | aaacattctt  | aatacatact  | tttgaagaaa  | acactgcatt  | tctcactgat  | tctggcaatc  |
| 6301 | tgttttttag  | tttctcaagg  | ttagatctat  | cttcttgatg  | gacatcagaa  | tagttcttca  |
| 6361 | tttccattac  | ttctttgaca  | taataagcta  | acttaaataat | tgactatta   | tttaaatcat  |
| 6421 | catttctttg  | cattgcatca  | aacacagcta  | cataacctga  | tatacgctga  | ccagcattat  |
| 6481 | gatgactgcg  | tacataactt  | aatgtttctt  | tcgtatctac  | tctcccatac  | acatcattta  |
| 6541 | taactcattt  | aattatatca  | tcaaacagct  | ttccatctga  | tttataaatt  | tcattagcaa  |
| 6601 | gttcattaac  | tgaactatac  | ctattatgca  | acatgccatc  | cttttagcttc | tcttttgcta  |
| 6661 | cactttttat  | tgaatatctt  | aactttttcta | caaaaaaactc | tgcccatctt  | tttacattaa  |
| 6721 | gtgcagtatc  | tgcttggttg  | ataatttctg  | tcttttacgcc | ctcaactact  | cccatcatct  |

|       |             |             |             |             |             |             |
|-------|-------------|-------------|-------------|-------------|-------------|-------------|
| 6781  | tatatggggtc | gctacttttta | gcttcaatac  | tagcatttctt | atcaagaaaa  | aatttgacca  |
| 6841  | tatctagggtc | accactataa  | gcggctacat  | gcagaggtgt  | tctaccatca  | ttatcttttag |
| 6901  | ctccaatatc  | agcaccttta  | tccacaagaa  | acttaggtat  | attcaaattt  | gccttgctga  |
| 6961  | gcagtctagt  | gcagagggtt  | acaaccatag  | atgtctttat  | ctttaacact  | aaaatgcttc  |
| 7021  | ctatcaaaaa  | gaatttctac  | tatgtccaac  | ctaccttttt  | ggatagcaat  | gtataaaggt  |
| 7081  | gttaaacggt  | taccttcaat  | atcaatagtt  | tcaattttttc | tagttaaatac | ttcagcttca  |
| 7141  | ctgatatcac  | tttgcaactat | agcattaaat  | acctgctctt  | ttaataaatt  | tactttctcc  |
| 7201  | ttgttaaagt  | cctctataat  | atcctctgaa  | ttacaaacag  | agactatgca  | ctttggatta  |
| 7261  | gaaccattgt  | atcattaaaa  | gcgaacatca  | tttctcttgc  | aggttgataa  | ttactccaat  |
| 7321  | tctccacttt  | tgcaatggtg  | ctatttccat  | atgatagcac  | taaactacca  | ttagcaatct  |
| 7381  | ccatatcaaa  | acccaataca  | gacttatctc  | taaaatcaac  | taaaccaatg  | tcattcttgc  |
| 7441  | tgatagggtt  | attatgataa  | atctgtaacc  | cttgttcttc  | tggttgataa  | tatctgaaag  |
| 7501  | agttagggtt  | catttctaca  | tgctcaagcc  | ttaagtttgt  | actatcaatc  | ttataaagct  |
| 7561  | cattattcat  | tcgtaataca  | atttgttgat  | gttctgggct  | ttgaaaataa  | tcaactaaac  |
| 7621  | caatggataa  | agaccattta  | gtaccttcac  | taccaagtac  | tgtaatatct  | tttatctcta  |
| 7681  | agctatcctc  | tgtaagggtc  | gaaattgatt  | gattataaca  | ttcattttata | taactccttt  |
| 7741  | taccctcttg  | tatgcttata  | ctatcaacat  | ctgttacatt  | caattcagca  | aatcaataa   |
| 7801  | tattgtaagg  | tatgttctga  | taaggcactg  | ctttgctttt  | tattttttaa  | ttaagtctta  |
| 7861  | tggggaatga  | cgagatttct  | tggtttaatg  | tatctggtag  | tttgataata  | tactgatgtt  |
| 7921  | gtccttctcc  | cccttctact  | gtggcgctct  | gatagtaatt  | acatagtgtc  | atatagtgat  |
| 7981  | cataatcata  | gctccttcca  | ttattacggt  | atttctgagt  | aacgtcagaa  | ttattatagc  |
| 8041  | taaaatcaac  | aattacctga  | tctgagtata  | tgccagcaat  | tatcaccttt  | tcagcaggta  |
| 8101  | ttcccatatg  | atttttagtg  | acttctattt  | gagatattgg  | tatgtcaaaa  | ttattgtcat  |
| 8161  | cagcaatacc  | ttttgcaatt  | tgataagtat  | caagtaactc  | ttgatctaga  | atacttgctt  |
| 8221  | gtataaatgc  | ttttaacttt  | ttttcactat  | tttgatgat   | ttctctgtca  | gtatcacttc  |
| 8281  | ctgaatttct  | caacttttga  | tacctaatat  | cttctattgt  | atcagacaaa  | gacattgtat  |
| 8341  | tgtaacagac  | tctgttattc  | cctggcaatt  | tacttgaatt  | actagatttt  | taaaatcatc  |
| 8401  | gattgtagta  | cttgaagcaa  | tactttgtgt  | atcattagct  | aaaagatcta  | agctatagct  |
| 8461  | gtctttttct  | gtatctttac  | ttactcccca  | ctgtgtaata  | ttagcaactt  | gaactcttat  |
| 8521  | tacgtcaata  | tttcctttca  | tttttcctgt  | actgcctaaa  | tcacttatta  | tcctagcatt  |
| 8581  | atcactgtct  | tcattaacga  | taaatattgt  | ttgctttaat  | cccctgtgat  | gcacgttttc  |
| 8641  | tttgctgact  | actctaactt  | cataatcttt  | atctgtgcag  | ttagatgaat  | tctgccaaac  |
| 8701  | tttcgcgttt  | ttttacatta  | attaatctcg  | tttcacagt   | agtagtaata  | ttttgcttgt  |
| 8761  | tgtcagaggt  | agatacatag  | ttatatgtgt  | taaccaatct  | tatgttatta  | ctattaccat  |
| 8821  | aacgtatagt  | tccactatgc  | aaatttgcag  | cgatattatt  | agctttaaca  | ttcattacta  |
| 8881  | gagtattttc  | ttttcctgct  | ccacctttga  | gggtaccaga  | catataatta  | ttaataataa  |
| 8941  | aaatagtttc  | attgttttta  | gagccaatat  | aacgtatatt  | actaccctct  | ggaatatgca  |
| 9001  | ttactgctgg  | ataatttgct  | gctgctgtta  | acgttttttg  | ccgtgaaata  | tataatatct  |
| 9061  | atcctctagg  | aaatgtttgc  | ttttttgtat  | tgccaggatc  | tttccttttc  | ggattagtaa  |
| 9121  | aaataaaaagg | ttcgcctgag  | agagtaaagc  | tctcttgaca  | gtttctataa  | attttgccac  |
| 9181  | tgttacatgg  | agcgaacgca  | tcgtcacctg  | tgtgctttgt  | attgattttt  | ttgctgcatt  |
| 9241  | gagatttttg  | tatcggattt  | gttaatggtg  | catctacaac  | tcttaaacca  | agatttttcat |
| 9301  | attcatattt  | tgtttagatga | gggatatgtt  | ttgcatccgt  | attaacaaca  | taaaactttct |
| 9361  | tttcttcaat  | ctcttgatag  | cattgatgac  | tattctttat  | accacagata  | aacctttccc  |
| 9421  | aaccttcaact | cataaccaaa  | gtataagggtg | tcatagtcaa  | tatcttagag  | atatcaatag  |
| 9481  | aagacaaatc  | tctttttaca  | ctagaagcta  | tattaatttt  | gtcaaaagag  | atatctttat  |
| 9541  | attttttttc  | taaatcacat  | gtccacttca  | tctgcgtcgc  | acaaccagga  | ccatgcggtg  |
| 9601  | atggcataat  | acataattttt | aatcacccca  | ctataatttct | cttcaattga  | gattacgtat  |
| 9661  | tgtacaaccg  | catctatgtc  | ataattgtca  | tttaacagtt  | taatagetgc  | ttcttttacg  |
| 9721  | taagttaaaat | acctttttat  | tctaattgta  | tcttcatatt  | cttttctaca  | tctcttctctg |
| 9781  | taaaaaactt  | aatcacccct  | gcaaaaaata  | cttccgcttg  | ttcaccacca  | ggtaatagag  |
| 9841  | tcacttgctc  | tgctatcgct  | ttagtatact  | ccattctttc  | atgaattttt  | acgcccattg  |
| 9901  | ttatcaatac  | atcagcaacc  | atagtaacta  | ctgctgccct  | acctaataact | ttgcctgcag  |
| 9961  | cagataaacc  | ccttaaaaatc | ttagtagtag  | cacttacact  | ttttatcgta  | aaactaacc   |
| 10021 | ctgcacttat  | aggccttatg  | ctcatgcttg  | ctagttttat  | accactacta  | gctgtccaat  |
| 10081 | aataatttaa  | tggtatgatta | ttaccttgag  | ctatttctgt  | tatactgtat  | ccaaattgat  |
| 10141 | aagcaatggt  | tgcaaatgta  | atactttgaa  | ctacaggatt  | actgataacc  | ttaacaaaag  |
| 10201 | cttgacgtgc  | aggccctggt  | atttttacca  | tcagttttcc  | tacttttacta | ctaggagaaa  |
| 10261 | tacttacacc  | taacatcatc  | catagcatct  | agtataccat  | tgataccaaa  | tacttgcttt  |
| 10321 | aaagcatcat  | tattatgtcg  | tccaagtgtt  | gctgtatcac  | ctatactatc  | aagcaagtca  |

|       |             |             |             |             |             |             |
|-------|-------------|-------------|-------------|-------------|-------------|-------------|
| 10381 | tatatagcca  | tcattgaaaa  | aaactgtcca  | ccttttgctc  | cttttatttt  | cgctgaatca  |
| 10441 | aattttatcac | gatcaaatgc  | aattccctttt | tctttaaggc  | tgcttttctac | attacaaata  |
| 10501 | taatctgcaa  | aaactttttc  | accaagatca  | tcaaaatgac  | ttttaaacct  | gtcgaaagta  |
| 10561 | tcttccttaa  | ctcctttttg  | taataaattc  | tatttaattt  | cctttacaat  | atcattgtaa  |
| 10621 | tcttgattag  | ttccaacata  | tcgaacatca  | catatgtctt  | caatgttttt  | tttattctcc  |
| 10681 | tacaactgct  | tatcatttga  | tagttgatgt  | aatttattat  | gaattttctc  | tctttctgca  |
| 10741 | tctgtataaa  | attttttaat  | tatatcatcg  | aattttcttc  | atagccatcg  | atgcttaaat  |
| 10801 | aatactcaat  | attttgtcct  | tttatttttt  | cttttataac  | gcatcctcc   | tacttttact  |
| 10861 | aagatctcaa  | taccatcact  | ataatcatct  | acaaatatct  | ttctgcattc  | ttcatttcta  |
| 10921 | taatatcacc  | tattatcaat  | tttttatcat  | taccattggt  | atcttttact  | tttacatata  |
| 10981 | catcagtcct  | atcagcattg  | cctatcatat  | caaacacttg  | ctcacgacct  | atatctacaa  |
| 11041 | tttcattagt  | taaatcctta  | gcattatcaa  | tatcaaatag  | ctctttaaca  | cgttgctttt  |
| 11101 | tttcttcctt  | tgtaaccttt  | tcttcatcac  | gtgaatctat  | gcagggtata  | cctatatcac  |
| 11161 | gtcttttctt  | tggtgcacat  | tggtctaaaac | taaaaataga  | actatgaact  | accttaacag  |
| 11221 | gagtaaacct  | atttttgctt  | ggtagaataa  | gagaatctgc  | attactcgct  | cctttgtcaa  |
| 11281 | agacaacacc  | cataaaagcc  | actttcctgc  | catctgtaag  | cgttttataa  | gtaacacctt  |
| 11341 | ttacatactc  | cttattttatc | tgatcatttg  | cctcttttac  | taatgcatca  | gctgttttac  |
| 11401 | cttcccttgg  | tcccttaagc  | tctaattgcta | ctggatcata  | ctccttagca  | ttactagctc  |
| 11461 | cttctgcaaa  | cttaatacca  | ttaaccagca  | tatcaatacg  | ttttcccttg  | ccagtttgaa  |
| 11521 | actctgttaa  | tactaatgct  | ctaggagatt  | cttctaattt  | caaatcacta  | taataactaa  |
| 11581 | atgccccatg  | taacactcct  | tgaaaattag  | cctcttcatt  | aataaaatct  | ctaaaagaaa  |
| 11641 | acattccttc  | tccaactttc  | tttagtagtg  | aattatattt  | atctactggg  | agagactggc  |
| 11701 | ctgctgcagg  | agtaacttga  | gacttaagtg  | cctcatcaaa  | tgccctctct  | agtcatttgg  |
| 11761 | gttaaggaac  | atcttaagga  | attatatcta  | ttaacctcct  | ctatgttaaa  | aaatctgatt  |
| 11821 | tcttttccgc  | atgtaagctt  | atgtatacct  | ctgtgatttt  | gctttgctcc  | ggtagatcac  |
| 11881 | caggtatagg  | tatcttttta  | ctgctacgat  | cccctcttcc  | cccttctcta  | acatgaaaaa  |
| 11941 | taaatacctc  | tttactacga  | ccttctctaa  | tcaacgcaa   | agttgttaca  | ggctttccgg  |
| 12001 | atcttgtggg  | agaagcaaga  | gaatattcac  | cgatgaaaa   | tataaatttc  | tttagatccg  |
| 12061 | ctctttttaa  | tttatcagca  | agaagaagtt  | gccctaagag  | aaatctacta  | aagtaattac  |
| 12121 | ctcctttctc  | tggcgtacca  | ggaaatgtgt  | gataaatacg  | ctccagtggc  | tgcttgattt  |
| 12181 | ttctttaaca  | ttagtgaccg  | tatcttgtct  | tccatcccaa  | tctgaagctt  | cctttaagag  |
| 12241 | tgcttgcat   | gtaggtagag  | caatttctct  | gtcttcacgg  | ggtgatatat  | gcattgaaaa  |
| 12301 | tttttcacct  | tcagttgaat  | ccaaatttaa  | cccttcacac  | agtacattat  | ctgaaatagt  |
| 12361 | caaaacacgc  | attgtatttg  | gctgaaagga  | ttttgcataa  | tgttttgctt  | gctctaattgc |
| 12421 | aatagctgat  | gtagtttgac  | tcccatcttt  | cacttttacct | cctttctcta  | actcttttaa  |
| 12481 | ctcttcttta  | gtggcagctt  | tcagttctat  | aataatagga  | acagcattta  | atgatctatc  |
| 12541 | cttaccacga  | ggcactagaa  | caatatcagc  | gtaacctctt  | cctgcaaatt  | gctctaagta  |
| 12601 | aaccctgaga  | ttatgtctat  | agcgaaaatt  | tactaaagca  | cctgctataa  | acccatgatg  |
| 12661 | tgctgcttct  | cgtgctttat  | cagcataagt  | aagcgaaacc  | ttgtattttg  | agtgaacttt  |
| 12721 | agtgattcta  | tcaatgactt  | tcttggaaga  | ttcttcaact  | ttacttgcat  | cagaattagt  |
| 12781 | taactcagct  | atataatcct  | cgggcttgct  | ttttgtatta  | tcattttcat  | ctttccatat  |
| 12841 | ttcctcttct  | tttttaattt  | cgtaaaaaat  | tatgactaat  | agcagagtca  | agtatttctt  |
| 12901 | tatcttgtgt  | ttcaacaaaa  | aatattctct  | tcatttttgt  | tgatttgcac  | taacttagat  |
| 12961 | ttaaccctac  | ccttaattct  | atctttaata  | cctcgtgccg  | taccgatctt  | ttgttgagtg  |
| 13021 | tcaggatgca  | aattttcttt  | taacatatat  | tccagttcac  | cagaagtaaa  | ttgatgacca  |
| 13081 | gaattaccat  | cttctgaaat  | agaaaatagt  | tatatacctt  | caatagcatc  | tacatcactt  |
| 13141 | ttaatttgac  | tatttttaac  | aacaactacc  | tttaatgttt  | ttgcagtggc  | aaaacgaaaa  |
| 13201 | taaacttttt  | tgtcacctaa  | tctttccgca  | atgtgtgtat  | ctggtaaaat  | agagaagctt  |
| 13261 | cctaaaaaga  | aatgcgaaaa  | aaacccttct  | ttacctaccg  | aatgtaaaata | tgatggaacc  |
| 13321 | tggtcaatgt  | atgattgaaa  | ccttgctttg  | aaagattcaa  | aatcactttt  | ttgttgggtt  |
| 13381 | gaagtacttg  | ggccaggttg  | actaactccc  | gctgtctctc  | gaattaacag  | ctctattaat  |
| 13441 | tcaaaatctt  | gtgggttttt  | ttgacttaac  | atatagcccc  | ctaaattata  | taataacttt  |
| 13501 | ttattcacct  | aaccttatat  | gagattttatc | atgcattttg  | ttaagcttta  | catcagataa  |
| 13561 | atcaccactt  | ggaccaggta  | tactcttttg  | gtcaagatct  | acatcaacag  | aaccactata  |
| 13621 | agataaaaa   | ttatttaaatg | aagcgtgatc  | tccttgctct  | aagatggaac  | atatgtaacc  |
| 13681 | tgctcgcata  | gaactcataa  | attcttcaat  | ctgttttagaa | ttagttttgt  | ccaatattgc  |
| 13741 | ccacacttgc  | tccatacaac  | ctttctcaac  | caaagggtact | aataaaacttc | cttgaaaagt  |
| 13801 | agaattgttc  | atcacttctc  | catttagtgc  | taagggtacga | tgactatcga  | atccatcttt  |
| 13861 | cattaacata  | tgcatcaaaa  | gcttcgcacc  | tacatttaag  | tattgcccag  | aacaaccccc  |
| 13921 | aagttttata  | tttcttaacc  | aggtacaata  | ataactaccc  | aacaccacat  | cacttggctt  |

|       |             |             |             |             |             |             |
|-------|-------------|-------------|-------------|-------------|-------------|-------------|
| 13981 | taagcagtcg  | aataactttt  | gaaattgata  | aaagttaa    | atttctaaca  | tcctacctag  |
| 14041 | agagaacccat | aataaccatt  | tttctccaaa  | tctcttttca  | aaagctctgg  | atatctatca  |
| 14101 | ggattttat   | ggcttaaaca  | aaattcaaac  | acatcaggat  | atccattatc  | gtgtgctgca  |
| 14161 | tgcactgcaa  | ttttcataaa  | aaccttatct  | ttttcctgag  | cacttaactc  | actttcaggt  |
| 14221 | aatgatttta  | tcttattcca  | aaagaactct  | actgcttctt  | acacgttttc  | tacgcatact  |
| 14281 | tattgctgca  | cgggtgtaa   | caagcacata  | gggatgctga  | tcttttagat  | ctaactctgc  |
| 14341 | aatgtatcca  | ctaacgaaat  | acgacccaaa  | ttgcatcatc  | gcatctgtat  | accaacttcc  |
| 14401 | acttactgat  | ttgactaact  | tttttaaatg  | atctgaatct  | ccatccttta  | tttcatcttc  |
| 14461 | ccgttttaaaa | tgctcaaata  | gggtaatgat  | gtcttcttct  | aagcaacacc  | aacatgcaat  |
| 14521 | ttggtaacga  | tcaaaatcat  | ctagcggatt  | atttgtacct  | ttccaactct  | tgggttcaat  |
| 14581 | catctttttt  | gccactattc  | ttctattgag  | tttgatacca  | tgtatcgtat  | cgggttttttc |
| 14641 | ccaacattct  | tcacttgaca  | atatatcaag  | gaaaaaagga  | aggtttccgg  | tattaatagt  |
| 14701 | ttccaagtac  | ccacgcccc   | aattccttat  | ttgaagttgt  | ttagattctt  | tataaggatc  |
| 14761 | gtcatcctta  | ataatagaga  | aaagctgcct  | tggttaggtc  | atctaagtc   | ataattatta  |
| 14821 | cctccacaaa  | caaaagcgta  | ttaagatata  | gaactatgat  | aatttatata  | ttctatatca  |
| 14881 | ttttcaatat  | cgtactacat  | ctttgtaacc  | tgtcaatcac  | tatttttagaa | aaacttttcta |
| 14941 | acccaaagta  | attttcaatg  | aaagcctttt  | aataggctga  | atatatgata  | ttttatttat  |
| 15001 | ttttaaat    | tgttttttat  | aagtttatct  | taattcttcc  | acaaacaaat  | tattattaac  |
| 15061 | ttagcaagat  | atattattag  | gatctcaagt  | aaagcaacca  | tttccagcac  | caaaaaacaa  |
| 15121 | gggcggtgac  | aacatttctg  | tttgggatcg  | tgtggtctac  | caagtgtacc  | gttcgaactt  |
| 15181 | ttccttataa  | taattttacc  | atatcacaaa  | atcagctata  | ttagcctact  | ttaactaaat  |
| 15241 | ttatatacga  | attaatttgc  | ctagcttctg  | tgcaaaaatt  | ttgcgttttt  | attttcacaa  |
| 15301 | tactattttt  | acgcaacgtg  | ttctcgcaaa  | ggtaggctact | atttttatgt  | ttttaaagaa  |
| 15361 | agtaaataat  | caaaattttt  | gtgatgctat  | agagtctggt  | attttttata  | agcttttaca  |
| 15421 | tgattgacaa  | tcactgaaat  | accaactaaa  | atatcaatgt  | ggtaatgtta  | agcgagaaga  |
| 15481 | aaaagtggat  | tttaacaat   | atgtcaaagg  | ggatactctt  | ttactttcat  | ctgacgccat  |
| 15541 | aaatataagc  | gacttagtaa  | gcttcctaga  | aaggaaccaa  | agcataacaa  | ggcttatctt  |
| 15601 | gagtttttag  | aaaattggta  | atgaagggtg  | aaaaatttta  | gctagtggca  | atcttccaaa  |
| 15661 | tcttacttca  | cttcatttat  | tttgtaacaa  | cattagcgct  | gaagggtgcag | aagctttggc  |
| 15721 | taagggcaat  | cttctaaacc  | ttgcttcact  | tcatttactt  | tttaacaaga  | ttggtgatga  |
| 15781 | aggtgtaaaa  | gcttttagcta | acggtaatct  | tacaaagctt  | acctcacttc  | ggttagtagc  |
| 15841 | taataagatt  | ggtaatgaag  | gtgcaaaagc  | tttagcta    | agcaatcttc  | caaatcttaa  |
| 15901 | attgcttttat | ttaggggaacc | atcttgatac  | aaaaagtgt   | aaagctttac  | tcgctaccaa  |
| 15961 | taatgttaga  | aatcttctta  | gccctgaatt  | agcaataaca  | ttggtgataa  | aggtgcagaa  |
| 16021 | gctctagcta  | agggcaatct  | tctaaacctt  | gcttcacttg  | aattatctaa  | taacaacatt  |
| 16081 | agcgctgaag  | gtgcagaagc  | tttggctaag  | gacaaccttc  | caaactcttac | ttcacttggg  |
| 16141 | ttaagttgta  | acaacattgg  | taataagggt  | gcagaagctt  | tagcta      | taaccttaca  |
| 16201 | aagtttacta  | aacttgatct  | atttggta    | aatattgatt  | ttgagcatat  | agaggttcta  |
| 16261 | gccagatctc  | aatgttctg   | aatcaagtta  | ggtgatcgag  | atcagaagg   | cttttatgat  |
| 16321 | ttcctattga  | aaaaatgttc  | taacaatcaa  | gtcgtagatg  | aagagagcat  | aaaaaggatg  |
| 16381 | attttttagtg | tagctagaag  | taatcatagt  | ggagatttgg  | ttaggtacat  | attgacacaa  |
| 16441 | cctgataaat  | accctttttt  | aatcaattca  | aaagatgagc  | aagggcacac  | actatctcat  |
| 16501 | ttttataatc  | actcacctga  | gatacaagag  | tttttggtca  | agcatgggtt  | agtttctgaa  |
| 16561 | aaagatagta  | cactacgaaa  | tattactaat  | gataaacaat  | ctgtgcacgc  | aggttttagca |
| 16621 | gttaagaaaa  | cgaagtttat  | cactaaaaac  | ttagtagaat  | ctataaaaagc | tagtgaagg   |
| 16681 | caattagagc  | aagcagtaaa  | ttcttatgtg  | gaaaatatag  | gactgcttaa  | acaatatcag  |
| 16741 | aatgatccaa  | taagactaag  | gcttcttagt  | ttaactaata  | atgaaaaaaa  | agtgcgatgg  |
| 16801 | aaaaaacatt  | acgtgagact  | gacccctacg  | caggtgatga  | aaaattttatt | gaggctgtta  |
| 16861 | ttgataaagc  | cgagcaagca  | ctaaaacagc  | agtattttaa  | aaagaacttc  | cgcggtgaat  |
| 16921 | atgaccaagg  | gtatctctac  | aaataggatg  | cagtatgatt  | acacaagggg  | tagcgaaagg  |
| 16981 | tttattacta  | tacctgaatc  | tataggttat  | ataaaaactac | ttattgatga  | tttttccgtt  |
| 17041 | ccactgaaag  | aaaaaaagga  | gttgctagtc  | actcttatgg  | aacaaaatcc  | agatttggtta |
| 17101 | aagaacaaat  | tatctaaggt  | aaaagaaaaa  | cttggaata   | gcgtaatcct  | cgataaagaa  |
| 17161 | cagttttaata | aaacagaact  | acatggatta  | ttagatggta  | tagatgacgg  | taaaaaagta  |
| 17221 | gatgagttgt  | tcaaagaaat  | cagttgtttg  | aatatagaag  | aggtctggag  | agagcaaaag  |
| 17281 | aattttattct | cctaaaacaa  | atatatatag  | cagcaacaac  | atatggtgaa  | aatagcagtg  |
| 17341 | cttgcatcca  | aggcacatgg  | agtcaaatta  | ttggtagtat  | aaacgaaatt  | agctccgaag  |
| 17401 | tcgtggcaca  | atatgatcgc  | tattttagaag | aagaacaaag  | gcgggaaatg  | caaaaagatg  |
| 17461 | ctattacaga  | agaaaatatt  | aatccatttt  | tgggaaggtt  | ggctaataag  | ctaattcaac  |
| 17521 | acgtagaact  | taatccagaa  | ttaaaagaaa  | ccttagaaga  | ttttgttgta  | tgcactgtgg  |

|       |             |             |            |             |             |             |
|-------|-------------|-------------|------------|-------------|-------------|-------------|
| 17581 | atattgataa  | acctgaagaa  | attaccttta | acagcaaaaa  | atttttagcag | agataaataa  |
| 17641 | atgcttttagt | gaaaatatta  | atgacatttt | acagaattat  | aatagaaaca  | taccaagtag  |
| 17701 | aggcgaatgc  | ggccttgtca  | tcgagggatt | gtcagaagtg  | aaagtaatgc  | aaagctttgt  |
| 17761 | acaaccaggt  | caagagccat  | ttaatcttca | ggagaatatc  | acaggggaaa  | acgtaccgtc  |
| 17821 | aattccagga  | aagttacaac  | caagtaaacc | aagtgaaaag  | agaagtaaac  | tgcctattgt  |
| 17881 | aactgcctct  | gcactggcaa  | tagctggagt | tgtttcggga  | atagctattg  | cagtttactt  |
| 17941 | agaaatgtta  | gcagtcggaa  | tagcagttgg | agcttgctgc  | ctagttgctg  | ctgctatcat  |
| 18001 | atattactgt  | aacagacctt  | caagttcact | tggaaatagc  | aatgttcaag  | gatcttgcaa  |
| 18061 | agaagttcaa  | gaaccccat   | ctgaaggaaa | gaaaaaatag  | tgagagatgt  | tctttaaata  |
| 18121 | ttaagtata   | accataataa  | tttagagatt | atcttgtttt  | tttttaagtt  | tacttgacga  |
| 18181 | ttatggctct  | tctagcatat  | cactagcttt | aagatttttt  | aggccagttg  | cctgatgtac  |
| 18241 | tacattaata  | ggaacaccta  | cctcaagtag | attctttgcc  | atttctgttc  | tccctatttt  |
| 18301 | tttacccttt  | tctttatcaa  | tctgtattct | tttagatact  | gacataatta  | atgaataaaa  |
| 18361 | tttatcacgt  | atttcttgat  | catcaatttt | attatactct  | ctcactaaat  | ctagtagccc  |
| 18421 | gttttctccc  | tctctatcct  | cattacttct | ttcaatttca  | acattgcctt  | tttctattag  |
| 18481 | ttcactaatt  | tttgccagta  | gagttttggc | gtgctgtgat  | aattcgtctg  | ctgtgttaca  |
| 18541 | tagttttcct  | attgtcatga  | tatgggttcc | ttgctcatag  | cgtcgtattt  | gaccacctgt  |
| 18601 | taaaccgact  | tcatttccta  | aatcctcctc | agaacgtccc  | cttgctagtc  | tccagtcttt  |
| 18661 | catattttcc  | cctgttttat  | aggctataaa | attaactatc  | tctgttttat  | tatgtttctc  |
| 18721 | aagttcatct  | ttagacaagc  | ctgttgtttg | gagaatgata  | tcaagggaaa  | taccgcgttt  |
| 18781 | aagtagattc  | tttgctactt  | taatctttcc | tgccctttta  | ccttcttctt  | cgcccatctg  |
| 18841 | gatagatttg  | tttaatgcag  | aggccatctt | acataattcc  | tgattcctaa  | attttttaca  |
| 18901 | ttctctaact  | agatttaatg  | ttttaccttc | aattttctct  | gatatcgctg  | attcaggcag  |
| 18961 | tagttttgcc  | atatcaatca  | ttagttccac | tactatcata  | cagaatataa  | tgattgaaat  |
| 19021 | cggattttcc  | cctcgctcat  | atctggacat | ttgcttctct  | aatactccga  | ctttacttcc  |
| 19081 | tagacctgcc  | tgagtatatc  | ttttcttttc | cctctcatgt  | tttaattttt  | tccctacttc  |
| 19141 | gtagtctggt  | aacttagtgt  | cattagtcac | gtctctttaa  | tataccttga  | gacacatata  |
| 19201 | tactctttta  | tctaagattc  | tattaaattc | actttcagag  | cttagtgtag  | tttttcaact  |
| 19261 | ttataattat  | cctcccta    | tgcgttttta | tactctttat  | catctttcca  | cactacttca  |
| 19321 | tctttccaaa  | gaattttaca  | accctcccgt | attaagccat  | tgaaactaaa  | acagccatac  |
| 19381 | tctgttactg  | ttttataatc  | cactagatct | attcctacac  | ttggacatgc  | tatcaccagc  |
| 19441 | tttcttaca   | ttgatatgtc  | tccttctggt | ggtgcttccc  | tttcgggta   | ggtatgtgat  |
| 19501 | actaccatag  | aacttgcttc  | tattcttacc | ccttgctcca  | taagctttct  | cgtatataatc |
| 19561 | gctttttatc  | tattttaaaa  | acatcatata | cttcttctac  | caataaataa  | tgcttttcat  |
| 19621 | ccatgtaaaa  | tactcttaag  | tgttctttat | ccgattgttc  | catcaaata   | tcaactaact  |
| 19681 | ttttcgagtc  | gttagtaatt  | ggtaaacggt | tatctaagtg  | tttttgcggt  | ccatttttgta |
| 19741 | cctcctagcg  | aagccaaata  | accataagtt | tttataactca | ttgagcagag  | ctcacagagt  |
| 19801 | atattaagtt  | tgattggata  | acggttggtt | gtacaggtat  | aaaggaatcg  | agatagatat  |
| 19861 | agacttccat  | atatcaaaa   | catcaggatc | gaaaaaaaat  | ttgattgagc  | catgtccgtc  |
| 19921 | cgtccgtccg  | tccgttaaca  | cgataaactg | agtaaatttt  | gagatatctt  | gatgaaattt  |
| 19981 | ggtatgtagg  | ttcctgagca  | ctcatctcag | atcgctattt  | aaaatggacg  | atatctgact  |
| 20041 | ataaccacgc  | ccactttttc  | gatatcgaaa | atttcgaaaa  | accgaaaaag  | tgcgataatt  |
| 20101 | cattaccaaa  | gacagataaa  | gcatgaaac  | ttcgtaggtg  | ggttgaactc  | atgacgcaga  |
| 20161 | atataaaaat  | agtaaaaatt  | tggaacaatg | gcgtggcacc  | gcccactttt  | aaaagaaggt  |
| 20221 | aattttaa    | tttgcaagct  | gtaatttggc | agtcggtgaa  | gatatcatga  | tgaaatttgg  |
| 20281 | caggaacggt  | actcctatta  | ctatatgtac | gcctaataaa  | aattagcaaa  | atcggagaag  |
| 20341 | gaccacgccc  | acttttaaaa  | aaaattttta | aagaaaattt  | taacaaaaaa  | tttaatatct  |
| 20401 | ttacagtata  | taagtaaaat  | atgtcaacat | tcaactccag  | taatgatatg  | gtgcaacaaa  |
| 20461 | atacaaaaat  | aaaagaaaa   | ttcaaaaatg | gcgtggctcc  | gccctttttc  | atttaatttg  |
| 20521 | tctaggatac  | ttttaatgtc  | ataagtcgaa | caaaaattta  | catcttttga  | aattttagg   |
| 20581 | ggcatagatt  | ttatgacgct  | aactcttttc | tgtgaaaatg  | ggcgaaatcg  | gttaaagcca  |
| 20641 | cgcccagttt  | ttatacacag  | tggctcgtct | gtccttccgc  | atggccctta  | acacgataac  |
| 20701 | ttgagcaaaa  | atcgacatat  | ctttactgaa | cttagttcac  | gtacttatct  | gaactcactt  |
| 20761 | tatcttggtg  | taaaaaataa  | acgaaatccg | actatgacca  | cgccactttt  | tgcgatatcg  |
| 20821 | aaaattacga  | aaaatgccat  | aattctatac | caaatacgaa  | aaaagggatg  | aaacatggca  |
| 20881 | attggattgg  | tttattgacg  | cgaaatataa | ctttagaaaa  | aactttgtaa  | aatggttgtg  |
| 20941 | atacctacca  | tattaagtac  | aagaaaatga | aaaagttctg  | cagtgcgaaa  | taaaaaacc   |
| 21001 | ttgaaatctt  | ggcgatatatt | acatatataa | ataaattagc  | ggtatccaac  | agatgatgtt  |
| 21061 | ctgggtcacc  | ctggtccaca  | ttttggtcga | tatctggaaa  | acgccttcac  | atatacaact  |
| 21121 | accaccactc  | ccttttaaaa  | ctctcattaa | tacctttaat  | ttgataccaa  | tatcgtacaa  |

|       |            |             |             |             |             |             |
|-------|------------|-------------|-------------|-------------|-------------|-------------|
| 21181 | acacattcta | gagtcacccc  | tggtcctcac  | ctttatggcg  | atatctcgaa  | aaggcgtcca  |
| 21241 | cctatagaac | taagccccac  | tcccttttaa  | aatactcatt  | aacacctttc  | atlttgatacc |
| 21301 | catatcgta  | aaacatattc  | tagagtcacc  | cctggtccac  | ctttatggcg  | atatctcgag  |
| 21361 | aaagcgacca | cctatagaac  | gaagaccac   | tcccttttaa  | aaatactcat  | taacaccttt  |
| 21421 | catttgatac | ccatatcgta  | caaacaaagt  | ctaagttgcg  | atacctcgaa  | aaggcgtccc  |
| 21481 | tcacctatag | aactaaggcg  | gccactccc   | ttttaaaata  | ctcattaaca  | cctttctttt  |
| 21541 | gatacccata | ttatacaaac  | gcattctaga  | gtcacccttg  | gtccaccttt  | atggcgatat  |
| 21601 | ctcgatcacc | actccctttt  | aaaaccctca  | ttaatacctt  | taattttata  | accttatcgt  |
| 21661 | acaaacacat | tctagagtca  | cccctgggtc  | acctttatgg  | cgatatttcg  | aaacggcttc  |
| 21721 | cacctataga | actaaggccc  | actccctttt  | aaaatactca  | ttaacacctt  | tcgtttgata  |
| 21781 | cccatattgt | acaaacgcat  | tctagagtca  | cccctgggtc  | acctttatgg  | cgatatctct  |
| 21841 | gaaaaggcga | ccacctatac  | aactaccacc  | actacatttt  | aaaaccctca  | ttaatacctt  |
| 21901 | taatttgata | cccatatcgt  | acaaacaaat  | tctaggggtc  | cccctgggtc  | acctttatgg  |
| 21961 | cgatatctcg | aaacggcgtc  | cacctatgga  | actaagggcc  | tcccttttaa  | tactcattac  |
| 22021 | acctttcttt | tgatacccat  | ttgtaaaaca  | tttagtcacc  | cctgtccacc  | tttatggcga  |
| 22081 | tatctcaaac | gcgtccccta  | tgactaagga  | ctccttttaa  | aaactcatta  | acctttcatt  |
| 22141 | tgatacccat | atcgtgcaaa  | caaattctag  | agtcaaccct  | gatccacctt  | tatggcgata  |
| 22201 | tccctaaatg | gcgtccacct  | atagaactat  | ggcccactcc  | ctcataaaat  | actcttagt   |
| 22261 | gcctttcggt | tgatagacat  | gtcatacaaa  | cacattccag  | ggtttccctc  | ggttcatttt  |
| 22321 | cgtacatggt | tattttccct  | tatgttgtea  | ccatagctct  | caactgagta  | tgtaatgttc  |
| 22381 | ggttacaccc | gaaattaacc  | ttctttactt  | gttttggtta  | accttggtca  | atcagactta  |
| 22441 | catagccact | ttgagtaacc  | atgatataat  | cttttagttc  | taccctata   | tttggtagta  |
| 22501 | ttaagacaag | gtccttagca  | atttccatat  | catcttttaa  | tggctctgat  | gtagtगत     |
| 22561 | aatgggtaat | ttttattgaa  | gttattgctt  | ctttcatcaa  | tatttggttc  | ataacacttt  |
| 22621 | gtacagtttc | tatacattca  | taaccgtagg  | tattttctgt  | aattgtttta  | cactctgcat  |
| 22681 | ccatgtaaac | cacttgatat  | ccttttttat  | taattgtcat  | atcttctcct  | cagaacaaaa  |
| 22741 | aaattccggt | agtataaaga  | ggtttctgct  | ttctctaaat  | atgtgcacca  | cgactgataa  |
| 22801 | ggtactcctt | cacgtcctct  | ttaatatctt  | tatcttgata  | ttcactatct  | tgagtagcca  |
| 22861 | aatatagcgg | tgtattatct  | ctcttgccct  | tggcatttat  | atgtgcccc   | tttattacaa  |
| 22921 | gacatttgac | catgtaaaag  | ttacaatggt  | cagcagctat  | atgtaatcca  | atggtgccat  |
| 22981 | cttctgttgt | agcattgaca  | taagctcctt  | tctctattag  | gtattctact  | acttcaacat  |
| 23041 | tatctcgctc | aacagcatta  | agtaaagggtg | tccagccggt  | ttctcccaca  | aaatttacat  |
| 23101 | caactccttt | ctcctctacc  | aaatattcaa  | caacgtccaa  | gtggccattt  | aatatcgcta  |
| 23161 | tttccaatag | atcattgcag  | tcataagtga  | catcttttcg  | gtcatcaaaa  | tattctatag  |
| 23221 | tatccaaatc | accacctaca  | atagcttcac  | caaataaagt  | actgccatat  | tcattaattg  |
| 23281 | gtgccatagg | atcaatactc  | ttttcttcta  | caaaatatatt | gactattcta  | acatggccat  |
| 23341 | attgaaatgc | ataatatacg  | ggagtacttt  | cattgtcagt  | aatattgtaa  | ttggcaccct  |
| 23401 | gatttattaa | aaatcttact  | atatcaatat  | ttcctgaata  | gacagcgtaa  | tacaacggag  |
| 23461 | tccaactacc | ttcatcctga  | gcgtttaaat  | cagctccttc  | aattagaata  | tatgctgtta  |
| 23521 | gatacaaatt | accttttttt  | gcagcaatac  | acaaaggagt  | acatctgtac  | tgatcaatag  |
| 23581 | cattactatc | agcccccttc  | tctataagat  | gtttaactgc  | ttcaagatta  | ccttcttcca  |
| 23641 | cagctaaatg | caaaggcgta  | tttcctttat  | cattcttaac  | attaacatct  | ttcttatcta  |
| 23701 | ctaaatactt | ttctatgata  | ttacacatac  | caacccccact | aaattaataa  | aactattcca  |
| 23761 | ttctacagac | acaaacatta  | ttttttaatt  | aactgcaaaa  | cccttataaa  | ttcctatatg  |
| 23821 | cactgctcat | tctctcta    | gagggcattc  | ataattatgc  | taatatctta  | tatatattaa  |
| 23881 | ttaacaacct | cactttcttc  | cctcttcaat  | ggcctcttct  | atgacggcag  | ctacttcggt  |
| 23941 | cagcttcttc | aactgattga  | tttctggtt   | tttacgcatt  | tccttcagca  | ccttttgata  |
| 24001 | aagatcttgt | cttttctcat  | tatcgagcag  | tttgacgtat  | agtttttagct | gctcaggggt  |
| 24061 | ctttgatagt | agtcgtgcta  | acactgattc  | tcggttattg  | ttattattac  | tcatataaaa  |
| 24121 | atcctcacta | attaacgctt  | caattttttt  | taatgtttac  | tactgttttc  | ttagtagtat  |
| 24181 | tggcataaag | ccatctat    | tggcggaagt  | caagaaaatt  | ttaaatat    | atltgttatt  |
| 24241 | aataatggta | aatatattgg  | cttcgataga  | gcattttcta  | cacaaactag  | gaagagggtt  |
| 24301 | ttcatctatt | cgttctacat  | cttcacattt  | ttctagcttt  | gtgccaggct  | ttagagcatt  |
| 24361 | atacaacgca | taactcacac  | aagctaattc  | aacaattccc  | ccaatcaccg  | ctatggcata  |
| 24421 | cattttcaat | atataagcta  | caacactact  | gactagtaac  | gccacaccca  | cacactacca  |
| 24481 | gatatgactg | cttgcgttgt  | taatggtttt  | tctcttttat  | ctgtagcatt  | atcatcaaaa  |
| 24541 | cgagggtttg | gagatagggtc | attggaagca  | tttgactctt  | gttcatcagt  | cttactgaa   |
| 24601 | gtttgctgga | ctttttcgct  | gttttcacat  | ataggctgaa  | gaccttca    | acttttattg  |
| 24661 | acatcttcgc | ataatccggt  | gtcagtggtta | gctttatcaa  | ttacagggtt  | atgctccaca  |
| 24721 | tcaaaactac | atacttcagt  | tactatttca  | catgcgttag  | ctggcatatc  | agtagctctg  |

|       |             |             |             |            |             |             |
|-------|-------------|-------------|-------------|------------|-------------|-------------|
| 24781 | gtactatcaa  | ttacagaagc  | agtatcttta  | tgttctgtag | ttgttggttc  | attagactca  |
| 24841 | aactatcttc  | atcgcatggt  | gcagttgtag  | tactagcatt | gggtggcagtc | tctgttacaa  |
| 24901 | cagtaagaaa  | tggtgcttgt  | tgttctatag  | ttgttctctt | attaagcaca  | tctcccagtt  |
| 24961 | ctctagaaaa  | ttttaagatt  | tcttctacag  | cttcactatt | ttcacactct  | tcagcatagg  |
| 25021 | tgaatggggg  | gtaaatcatt  | tcctcgccat  | ctgaatgttt | tataattatt  | ctctttttta  |
| 25081 | gaatatcttt  | caaaatacca  | ttttcctcag  | agatttttaa | cactactctc  | ataatgtcat  |
| 25141 | tgtctctacg  | tgatatagca  | tctgtaagta  | ttgtatgagt | ttcttccgac  | catctgaatg  |
| 25201 | ttttgtagtc  | atttctttca  | ttcagaactt  | cctttaatag | tttttgtttt  | ttggcttctt  |
| 25261 | ctaaaagatc  | ctttacagca  | ggcatgctta  | accaacgaac | cgaatatcat  | ttcgttacga  |
| 25321 | tattaacggt  | aataaacgaa  | acaaagacat  | ttcgtttcgt | ttattaacgt  | taagaacgct  |
| 25381 | aaattaacga  | aatgattttg  | tttcgttttt  | ctgccatatc | aaaacgaaat  | caaatcgttt  |
| 25441 | atggttgatta | ttaatattcaa | actatgctgc  | aaagctgatt | gatggcggag  | tcattaaggt  |
| 25501 | gaaagcatta  | gccaagctga  | ttgcaacttt  | tcctcatgaa | ttttgacagt  | acgaacattt  |
| 25561 | ctcagagtag  | ttttgacatt  | accaccagga  | ttacacaaac | aaattacatg  | aagtttggtg  |
| 25621 | gtatgttcgc  | tcgctgttag  | caccttacgg  | cttcaccatg | gctatagcat  | tgccagcaca  |
| 25681 | atcaaacata  | taaagtatca  | cgttttttgt  | taacgttttt | aagggttaacg | aaatctttcg  |
| 25741 | ttcgggttaaa | aacgagatat  | atztatcttg  | ataatttttt | tatcgataat  | attcgaaagt  |
| 25801 | gtttcaacgg  | aaaacggtgg  | gaaatttttg  | atacgagtag | cttaacgtta  | agatgcatcc  |
| 25861 | ctgactttac  | agcttgatta  | tttttatgac  | ttatagctaa | tgatagagaa  | gataatgtct  |
| 25921 | cctctctacc  | tgatattgta  | agttattttc  | tgctaagaat | cgtgcttgcg  | tatagctgat  |
| 25981 | ttttgaatat  | tctattttctg | aacactccag  | caatactttc | cctcctctat  | tctgttgcta  |
| 26041 | gtgtttgata  | ttcttttctt  | cgtatctggt  | aactctatat | atcacatact  | atgtcaggtt  |
| 26101 | tgacgttttc  | ataatgtttt  | cccctattaa  | gatttattga | tttagtggtg  | gtagttgcag  |
| 26161 | ttgctcacc   | cataaagtgt  | gtgctttctt  | tcaatcaaag | gtattctact  | gttttaaatt  |
| 26221 | ccctgtaaag  | atthagctta  | tctttttacat | ctaaacagca | ttaacacgat  | ttggcttttt  |
| 26281 | gtagatgagt  | aattctctag  | ggattatcct  | attgaattct | ataatatatt  | ttgtcacatt  |
| 26341 | gtctaaagtg  | cccagacact  | gggatcagaa  | ttttgttatg | cctgagctga  | tgagctaaag  |
| 26401 | gtagttgtct  | tacgctaaaa  | caaacgtttt  | ttaattaagt | tgcatagaag  | ctggatccca  |
| 26461 | gtgtctgggc  | actgggatga  | caccatttgc  | tgtgcaattt | accttcaaaa  | atgaatgttc  |
| 26521 | gtacagctat  | gtgtcagcta  | cttgcatgac  | accctgctgg | tgggacaatg  | tttgtatagt  |
| 26581 | tgtgcgtcac  | gcgctggaat  | gacgaattac  | ttaaccgtca | taccgtcacg  | gtatctctta  |
| 26641 | ggatagatcc  | cgctaacacg  | tagcgggatg  | acgaatttgt | atcggaaaac  | aagtagcatg  |
| 26701 | acggtttgtc  | aaatgtctct  | cagttttctca | aaaaaatcct | ttaacaaaaa  | gagcattctg  |
| 26761 | tttctaatat  | cccaccataa  | acttcaggta  | tatggctgca | aaattgaaat  | atcttagcac  |
| 26821 | catttttcaat | tcctccacct  | tttgatttat  | aagctccaaa | gtacaatcgt  | ttaatcctgg  |
| 26881 | caaaggaaat  | agcttgagca  | cacatcggac  | atggttctaa | tgttacgtat  | atgtcagaat  |
| 26941 | cataaagcgt  | tgaagttagg  | agcaactcac  | atgcctgctt | gatcgctaac  | atctctgcat  |
| 27001 | gtgcagttgg  | atcgttggat  | atgttgtgtg  | cagaagaaac | gacattgctt  | ccactaatta  |
| 27061 | ttacggcaca  | tatgggaacc  | tcatcatttt  | tttgagcaag | tttggcttgc  | tctatggcaa  |
| 27121 | gtcccatata  | ttgatacttg  | aacacttttc  | tttgctaata | ttcttttttt  | taaattttat  |
| 27181 | taactgctgc  | cttaataaac  | gatataaaaa  | gaggatgagg | agaaaacggc  | tttgattgaa  |
| 27241 | actctggatg  | aaactgcaca  | ccaataaacc  | acggatgact | ctctaactcc  | actgcctcta  |
| 27301 | tacatgtttc  | atcttctgat  | atgccactgc  | atagcagccc | attttttttc  | aaatcatctt  |
| 27361 | tataatctga  | attgattatg  | tatctatgtc  | tgtgtctttc | tgaaatagta  | gtgttactat  |
| 27421 | atgcatccat  | catttttagag | cttgcattta  | tattacattt | gtatgcccc   | agtctcatgg  |
| 27481 | ttccaccaag  | atcgatcatc  | tgatcgccag  | ctaacttaac | gattggatgt  | ttacagttat  |
| 27541 | gaaattcttc  | agagtgtgca  | tcttcaaget  | taacaacatt | acgagcaaac  | tcaataattg  |
| 27601 | caagctgcat  | accaaggcaa  | attccgaaaa  | atgggatatt | atltgtacgg  | gcataattta  |
| 27661 | ttgctaatat  | tttactctct  | actccgtcat  | gaccaaacc  | ccctgggaca  | agaattgcat  |
| 27721 | gagaattctg  | taacttctcc  | cctataaget  | tttcatttat | aggtttttct  | tccttctctc  |
| 27781 | ttgagttaac  | ccaatttatc  | tttactttga  | ctttattact | aatcgacca   | ttatttaattg |
| 27841 | cttcaactag  | tgattttatac | gcatacaggga | atlcggtgta | ttttcccaact | atagacacag  |
| 27901 | taacttccctg | tgttgggtgc  | cttggtggaat | gcactatttg | atcccattca  | atcaagcttg  |
| 27961 | gttttggtctc | acttaaatga  | aagtgtcca   | aaatttgctg | atcaagccca  | cattggctat  |
| 28021 | acaacatcgg  | taactcatat  | atatgactca  | catcaggagc | aggtatcaca  | ctggacaaag  |
| 28081 | aaacattgca  | aagcttagct  | atlttctctc  | tctgattatc | gaaaatttct  | ttctcactgc  |
| 28141 | ggcataatat  | aatatctggt  | tgtaaccccc  | cggaatttaa | ctctcgaact  | gaatgctgcg  |
| 28201 | ttggttttgt  | cttttaattct | tgcgctgcgg  | taagatatgg | tattaaagtt  | aagtgaataa  |
| 28261 | ggataactct  | ttgttttcct  | aatgtgtagt  | taacttggcg | tatagcctcc  | aaaaatggtt  |
| 28321 | ggcttttcaat | ttcacctaca  | gttgcgcccta | tttcacatat | tataaaatct  | aaaccttccg  |

```

28381 tactattaaa aatgaacaat ttgattaaag ctgtcacatg aggaatgact tgcacagttt
28441 tgcccagata atcaccacgc ctctctttct tcaacaactc atgatataatc ttaccagttg
28501 ttatatgtgc atcttttggt gctttaattc cagtaaaacg cttataatgc ccaagatcca
28561 aatcagtttc accaccatcc tcggtaacaa acacctctcc gtgctgagtt ggggttcattg
28621 tcccaggatc aatgttgaga tacgggtcaa gttttctgat acggatctta aaaccgtaag
28681 cttgaagaag cgcaccaacg cttgaagcaa ctaagccttt accaagcgat gacacaactc
28741 cacctgtgac aaagataaat ttagcttcct tcattaattt tcaaattggaa cagaagtagg
28801 ttcactttct tgcttttttt ctaatataat tttctctgca atcgattttt tatgtacgtc
28861 ttttgaatat aatcctgaca atagcaatgt gtttataata aacaatccat caacaatagc
28921 cgttattctg ctgagcgggt tttcagaaga ttttaccgga atcatcgaat tgactccctg
28981 ttgtgtatta ctaaaaccac ttaacgaact actcccaggc ggctgcaata gcactaaaat
29041 tactaacaca acaaccaata ttacttgaag aatacttaat accgctactg atattataga
29101 tagagatgaa aataaaaatt ttatgagcat aaagtacata agtcaagaac atctgtcacc
29161 caagtagctt ggaatctaag tatgtattta ctgcctacct tattttgggt agcatatgca
29221 taaaactgtg ggcttaatat gtatcacatt ttaaaatata aagattatga accaaaaata
29281 ggccaacgtg ctttcatcgc aggtggttcg catatcatag gcaagggtga aataggaaaa
29341 gatgcgagca tctggtttaa ttgtgtgggt agaggggacg ttggatcaat aaaaataggt
29401 gatggaacaa atattcaaga tggaacggta attcatgtgg atagaaaccc aggtggtgat
29461 acaactattg gcaatatggt aacagtggga catttttgta tgttgcatgc atgtatggtg
29521 catgataaag cgtttattgg tatgggctct accgtgatgg accatgcagt tgtggagcct
29581 gaagctatgg tagctgctgg ctgcctagtg acacatggaa aagtaataaa aagtggggaa
29641 atataagttc tcaaaaaaaa tgtcgaatga agaaattaaa catattacac aatcagcaca
29701 aaattatatt atgctaataa aggaatataa aaattaaagt tcgcgtgagg ctaatttata
29761 ctaccaaccc tattgacgga ctgcatagac agattagaaa attaactaaa actaagggct
29821 catttattag cttgtacaaa caggtatatt gtgctatgaa aaaggcagac caaaattgga
29881 ctatcctaata tgggttttaa ctatatctca acttgatatt ttatttcctg gtagattgaa
29941 aattgagttg agttaaaaat gcggtttgac acactttttt gaacatttcc ttattgcctg
30001 tttttacaat tttgaattga ttccttaggt tatgcaagag gtctattgag caaatccaat
30061 aatatccttc atttctttta tattatgggt tgcaatttct gctgctttct ttgtacctt
30121 ttttaatat tccacgtaaat ggaattgggt ttttaaaaga tcattcatc tctcacgtat
30181 ggggtgatata acactgataa ttaaatcagc taactctttt ttgaagtgt tcatgtcatg
30241 tttgttcact tcttcacata ctttttccgc atttacatta ctaagcactg aataaatggt
30301 tatcaaattg cttattttctg gtcggcactc taaagtagca aaatcaaagc ctataattga
30361 atctgttttt gctttttcta tttttttgac aattaaatca tccgtatcat caagggttaat
30421 gcacgaatat tctgaagggt cagatttact catcttgctt gtgctatctc ttaagctcat
30481 tattcttgat gtgcaatcca aagttaagat ttcagggtac atgaaataat ccagtttata
30541 atgattgtta a

```

//

```

LOCUS      JAQZAU010000035      872 bp      dna      linear      ENV 17-MAR-2023
DEFINITION MAG: Wolbachia pipientis isolate wEsol contig_29171, whole genome
            shotgun sequence.
ACCESSION  JAQZAU010000035  JAQZAU010000000
VERSION    JAQZAU010000035.1
DBLINK     BioProject: PRJNA929258
            BioSample: SAMN33142973
KEYWORDS   WGS; ENV; Metagenome Assembled Genome; MAG.
SOURCE     Wolbachia pipientis (insect metagenome)
ORGANISM   Wolbachia pipientis
            Bacteria; Pseudomonadota; Alphaproteobacteria; Rickettsiales;
            Anaplasmataceae; Wolbachieae; Wolbachia.
REFERENCE  1 (bases 1 to 872)
AUTHORS    Fiutek,N., Couger,B.M., Roy,S., de la Torre,J.R. and Connor,E.F.
TITLE      Genomic assessment of the contribution of the Wolbachia
            endosymbiont of Eurosta solidaginis to gall-induction
JOURNAL    International Journal Molecular Sciences
REFERENCE  2 (bases 1 to 872)
AUTHORS    Fiutek,N., Couger,B.M., Roy,S., de la Torre,J.R. and Connor,E.F.
TITLE      Direct Submission
JOURNAL    Submitted (10-FEB-2023) Biology, San Francisco State University,
            1600 Holloway Ave, San Francisco, CA 94132, USA

```

```

COMMENT      ##Genome-Assembly-Data-START##
              Assembly Date      :: JUN-2019
              Assembly Method    :: FLYE v. 06-2019
              Genome Representation :: Full
              Expected Final Version :: Yes
              Genome Coverage    :: 100.0x
              Sequencing Technology :: Illumina HiSeq; PacBio Sequel
              ##Genome-Assembly-Data-END##

FEATURES      Location/Qualifiers
              source              1..872
                                   /organism="Wolbachia pipientis"
                                   /mol_type="genomic DNA"
                                   /submitter_seqid="contig_29171"
                                   /isolate="wEsol"
                                   /isolation_source="galls on Solidago altissima"
                                   /host="Eurosta solidaginis MN-2018-EFC"
                                   /db_xref="taxon:955"
                                   /environmental_sample
                                   /country="USA: Cowling Arboretum, Carleton College,
                                   Northfield, MN"
                                   /lat_lon="44.48 N 93.13 W"
                                   /altitude="280 m"
                                   /collection_date="2018-11"
                                   /metagenome_source="insect metagenome"
                                   /note="metagenomic"
              gene                complement(163..447)
                                   /locus_tag="wEsol_00276"
              CDS                 complement(163..447)
                                   /locus_tag="wEsol_00276"
                                   /codon_start=1
                                   /transl_table=11
                                   /fullproduct="qcoverage 100 , hcoverage 100 , similarity
                                   98.9 , identity 98.9 , evalue 2.51e-58 , alnlength 94 ,
                                   Bacteria , Proteobacteria , AAS13858.1 hypothetical
                                   protein WD_0102 [Wolbachia endosymbiont of Drosophila
                                   melanogaster]"
                                   /translation="MNL$WRGYRLIAADVSGMRLPSSGEIVSEFEPNGTTGTIGNLFV
                                   DLCTSLICSARLAAWNIGEQTAAEQLP$EVITQMRLLNQ$EKLLFIYDRLQ"
                                   /product="hypothetical protein"
                                   /besthit="qcoverage 100 , hcoverage 100 , similarity 98.9
                                   , identity 98.9 , evalue 2.51e-58 , alnlength 94 ,
                                   Bacteria , Proteobacteria , AAS13858.1 hypothetical
                                   protein WD_0102 [Wolbachia endosymbiont of Drosophila
                                   melanogaster]"

ORIGIN
      1 tataactctt actttctgtc ctttcatttt attttttagc ttttcatttt ctaatatataaa
     61 atcaaaatct aattcgccag cgttcccata gcttactata atttcttttt tgcaagcgaa
    121 aaataaaaatc tacttccaaa tcataatgct gctgaatgaa ttttactgaa gacgatcata
    181 gataaataat aattttctctt gatttaataa acgcatttga gtgataactt cgggtaattg
    241 ctctgccgcc aacgtttgtt cacctatatt ccaagctgca agacgagcac tacaaatcag
    301 cgaagtacac aaatcaacaa acaaattgcc aatggtgcct gttgttccat ttggttcaaa
    361 ctcgataaca atttccccag agctgggtaa tctcatacca gaaacatctg ctgcaataag
    421 tctatagcct ctccaactca ggttcacatc gataggctgt ttggatgctt aaattcttga
    481 aagcctgtat ggcaaatctt atatcttgct ttagaaaaag cttgctttga ggggtacatgt
    541 caatggctcc ataagttcac attctattcc caaacttttt tttaactaac tttaaaatca
    601 tagaaagtac tgtcgaaaaa gcttgttcgt gtaaaaactca acacaatgga ttttctgaaa
    661 agtttttcgag tatattatat ttttaatttg tagaataagg ttttttcctt tttgcatatt
    721 tcacctaaaa aggacacatt ttagacttct ttgttgaaat aaaacagaaa caaaagtgc
    781 gtcccttgca ctctttggat aatttaatga taaaaaattt agagagaaat tttatacact
    841 atcgctgata tttttcctta agttgatgcc at

```

```

//
LOCUS      JAQZAU010000036      849 bp      dna      linear      ENV 17-MAR-2023
DEFINITION MAG: Wolbachia pipientis isolate wEsol contig_29338, whole genome
            shotgun sequence.
ACCESSION  JAQZAU010000036  JAQZAU010000000
VERSION    JAQZAU010000036.1
DBLINK     BioProject: PRJNA929258
            BioSample: SAMN33142973
KEYWORDS   WGS; ENV; Metagenome Assembled Genome; MAG.
SOURCE     Wolbachia pipientis (insect metagenome)
  ORGANISM Wolbachia pipientis
            Bacteria; Pseudomonadota; Alphaproteobacteria; Rickettsiales;
            Anaplasmataceae; Wolbachieae; Wolbachia.
REFERENCE  1  (bases 1 to 849)
  AUTHORS  Fiutek,N., Couger,B.M., Roy,S., de la Torre,J.R. and Connor,E.F.
  TITLE    Genomic assessment of the contribution of the Wolbachia
            endosymbiont of Eurosta solidaginis to gall-induction
  JOURNAL   International Journal Molecular Sciences
REFERENCE  2  (bases 1 to 849)
  AUTHORS  Fiutek,N., Couger,B.M., Roy,S., de la Torre,J.R. and Connor,E.F.
  TITLE    Direct Submission
  JOURNAL   Submitted (10-FEB-2023) Biology, San Francisco State University,
            1600 Holloway Ave, San Francisco, CA 94132, USA
COMMENT    ##Genome-Assembly-Data-START##
            Assembly Date      :: JUN-2019
            Assembly Method     :: FLYE v. 06-2019
            Genome Representation :: Full
            Expected Final Version :: Yes
            Genome Coverage     :: 100.0x
            Sequencing Technology :: Illumina HiSeq; PacBio Sequel
            ##Genome-Assembly-Data-END##
FEATURES   Location/Qualifiers
     source      1..849
                  /organism="Wolbachia pipientis"
                  /mol_type="genomic DNA"
                  /submitter_seqid="contig_29338"
                  /isolate="wEsol"
                  /isolation_source="galls on Solidago altissima"
                  /host="Eurosta solidaginis MN-2018-EFC"
                  /db_xref="taxon:955"
                  /environmental_sample
                  /country="USA: Cowling Arboretum, Carleton College,
                  Northfield, MN"
                  /lat_lon="44.48 N 93.13 W"
                  /altitude="280 m"
                  /collection_date="2018-11"
                  /metagenome_source="insect metagenome"
                  /note="metagenomic"
     gene        complement(740..>849)
                  /locus_tag="wEsol_00277"
     CDS         complement(740..>849)
                  /locus_tag="wEsol_00277"
                  /codon_start=1
                  /transl_table=11
                  /product="hypothetical protein"
                  /translation="RKRVKYLLYRNCYKHRNYVGFCTGGMVAKEKAVKN"
ORIGIN
1 aaactattac tcaaaaatgg tgcagaccca aattgacctt acccagaaaa agtagagaga
61 aagttaagac gtttttatca tgagaataaa ttgtgcagga atgcaatagt taatagtaga
121 atgtctacgt tatttgttat aaaagatttc tatgtattca aatatggcag ttctggtttg

```

```

181 ttgagcgaga agtatcaata agcagctccc ttttaagtga acttttctgc aacagagtta
241 tcgtaacaac agcccttatg gctcatgctg gaaatgatgt tttttgtatt caatagaaat
301 tggtaatttt gagaggtata ctgtgaccct tgatcgctat gtaacagcag atttttatcg
361 ggtttgcgtt tatcaacggc catcaataaa gaatctataa ctaattatca tgttactcat
421 taaccaccat gcgtgaatat aggtcaatta ttgccgccaa caaccttctt tagtttttat
481 gtaggtaatc ccaaacttta tttggctgat cagtagtaaa ttttgatcca atgtgttcgg
541 agccacaact cggttgctta tttgctgttt ttattttgaa ccttcgtcta agcttggttt
601 atgcttttct tgcataacac tttgtactgt ttttaatttt tgcctaaagc ttttattcag
661 cgtgaatttt aggggctcca tatctgcatt tagaatgctt gatgtatttt ttgaatatct
721 gctagaagcc cttcttttgc taattcttta ctgctttttc cttagcaacc ataccaccag
781 tacaaaaccc tacatagtgc ctgtgtttat agcaatttct atataaaaga tactttactc
841 tttttcttt

```

//

```

LOCUS      JAQZAU010000037      3037 bp      dna      linear      ENV 17-MAR-2023
DEFINITION MAG: Wolbachia pipientis isolate wEsol contig_29641, whole genome
            shotgun sequence.
ACCESSION  JAQZAU010000037  JAQZAU010000000
VERSION    JAQZAU010000037.1
DBLINK     BioProject: PRJNA929258
            BioSample: SAMN33142973
KEYWORDS   WGS; ENV; Metagenome Assembled Genome; MAG.
SOURCE     Wolbachia pipientis (insect metagenome)
ORGANISM   Wolbachia pipientis
            Bacteria; Pseudomonadota; Alphaproteobacteria; Rickettsiales;
            Anaplasmataceae; Wolbachieae; Wolbachia.
REFERENCE  1  (bases 1 to 3037)
AUTHORS    Fiutek,N., Couger,B.M., Roy,S., de la Torre,J.R. and Connor,E.F.
TITLE      Genomic assessment of the contribution of the Wolbachia
            endosymbiont of Eurosta solidaginis to gall-induction
JOURNAL    International Journal Molecular Sciences
REFERENCE  2  (bases 1 to 3037)
AUTHORS    Fiutek,N., Couger,B.M., Roy,S., de la Torre,J.R. and Connor,E.F.
TITLE      Direct Submission
JOURNAL    Submitted (10-FEB-2023) Biology, San Francisco State University,
            1600 Holloway Ave, San Francisco, CA 94132, USA
COMMENT    ##Genome-Assembly-Data-START##
            Assembly Date      :: JUN-2019
            Assembly Method    :: FLYE v. 06-2019
            Genome Representation :: Full
            Expected Final Version :: Yes
            Genome Coverage    :: 100.0x
            Sequencing Technology :: Illumina HiSeq; PacBio Sequel
            ##Genome-Assembly-Data-END##
FEATURES   Location/Qualifiers
            source              1..3037
                                /organism="Wolbachia pipientis"
                                /mol_type="genomic DNA"
                                /submitter_seqid="contig_29641"
                                /isolate="wEsol"
                                /isolation_source="galls on Solidago altissima"
                                /host="Eurosta solidaginis MN-2018-EFC"
                                /db_xref="taxon:955"
                                /environmental_sample
                                /country="USA: Cowling Arboretum, Carleton College,
                                Northfield, MN"
                                /lat_lon="44.48 N 93.13 W"
                                /altitude="280 m"
                                /collection_date="2018-11"
                                /metagenome_source="insect metagenome"
                                /note="metagenomic"

```

```

gene          40..387
              /locus_tag="wEsol_00278"
CDS           40..387
              /locus_tag="wEsol_00278"
              /codon_start=1
              /transl_table=11
              /fullproduct="qcoverage 100 , hcoverage 100 , similarity
100 , identity 100 , evalue 2.74e-74 , alnlength 115 ,
Bacteria;Eukaryota , Proteobacteria;Arthropoda ,
WP_155968342.1 MULTISPECIES: IS630 transposase-related
protein [Wolbachia]"
              /cog="COG3415 COG3415 138 Transposase and inactivated
derivatives"
              /pfam="HTH_Tnp_IS630 HTH_Tnp_1 HTH_23 HTH_28 HTH_29 HTH_7
CENP-B_N Pfam-B_14738 HTH_8 HTH_17 HTH_24 Pfam-B_2106"
              /product="IS630 transposase-related protein"
              /translation="MAYSVDLRERAVSMIEKGKSKVEVAELLEIGIATLYRWLRKKAA
GESLRPSKNGSFIRKIDPKILEEYVKKNPDHTLAEMKQNLGFGINSIWYRLKQLRITL
KKSYSITISRAQSRR"
              /besthit="qcoverage 100 , hcoverage 100 , similarity 100
, identity 100 , evalue 2.74e-74 , alnlength 115 ,
Bacteria;Eukaryota , Proteobacteria;Arthropoda ,
WP_155968342.1 MULTISPECIES: IS630 transposase-related
protein [Wolbachia]"
gene          587..898
              /locus_tag="wEsol_00279"
CDS           587..898
              /locus_tag="wEsol_00279"
              /codon_start=1
              /transl_table=11
              /fullproduct="qcoverage 100 , hcoverage 100 , similarity
100 , identity 100 , evalue 1.60e-74 , alnlength 103 ,
Bacteria , Proteobacteria , WP_155968470.1 transposase
[Wolbachia pipientis]"
              /cog="COG3335 COG3335 132 Transposase and inactivated
derivatives"
              /pfam="DDE_3 DDE_1"
              /product="transposase"
              /translation="MTFKGGCDKEVFNTWLEKMLLPKLPHGTTIVMDNATFHKTPKTK
ELIDNARCRLLYLPTYSPDLNPIEHWCWNTIKSRLRPLMHKYTDLQLLVGNTIMEIYHS
F"
              /besthit="qcoverage 100 , hcoverage 100 , similarity 100
, identity 100 , evalue 1.60e-74 , alnlength 103 ,
Bacteria , Proteobacteria , WP_155968470.1 transposase
[Wolbachia pipientis]"
gene          complement(935..1276)
              /locus_tag="wEsol_00280"
CDS           complement(935..1276)
              /locus_tag="wEsol_00280"
              /codon_start=1
              /transl_table=11
              /fullproduct="qcoverage 100 , hcoverage 100 , similarity
100 , identity 100 , evalue 1.53e-79 , alnlength 113 ,
Bacteria , Proteobacteria , AAS13810.1 transposase, IS5
family, OrfB [Wolbachia endosymbiont of Drosophila
melanogaster]"
              /cog="COG3293 COG3293 124 Transposase and inactivated
derivatives"
              /pfam="DDE_Tnp_1_2 DDE_Tnp_1"
              /product="transposase, IS5 family, OrfB"

```

```

/translation="MRTKYTKVKKMWADMGYQGRNLKNHIKEEYDIDIEIVKRPPCRF
WVHKDTPPELLPTREQGFKVQPRRWVVERTFAWVNRNRRLSKEYDLLTTSTENFIYLA
MSRVMLKREYA"
/besthit="qcoverage 100 , hcoverage 100 , similarity 100
, identity 100 , evalue 1.53e-79 , alnlength 113 ,
Bacteria , Proteobacteria , AAS13810.1 transposase, IS5
family, OrfB [Wolbachia endosymbiont of Drosophila
melanogaster]"
gene complement(1387..1767)
/locus_tag="wEsol_00281"
CDS complement(1387..1767)
/locus_tag="wEsol_00281"
/codon_start=1
/transl_table=11
/fullproduct="qcoverage 100 , hcoverage 100 , similarity
100 , identity 100 , evalue 1.16e-87 , alnlength 126 ,
Bacteria , Proteobacteria , AOV87106.1 transposase
[Wolbachia endosymbiont of Drosophila incompta]"
/cog="COG3293 COG3293 124 Transposase and inactivated
derivatives"
/pfam="DUF4096"
/product="transposase"
/translation="MRKKYPTDLSEREWARIEKHFRVSYKKGGRPPKYSKREILEAIF
YVLRTGCQWRYLPNDFPLWKTVYEQFRQWKKQGIFEKMNYEITKYSRRKIGRNEQPSA
CIVDSQSVKTTEKGGSKAMMEVKK"
/besthit="qcoverage 100 , hcoverage 100 , similarity 100
, identity 100 , evalue 1.16e-87 , alnlength 126 ,
Bacteria , Proteobacteria , AOV87106.1 transposase
[Wolbachia endosymbiont of Drosophila incompta]"
gene complement(1854..2195)
/locus_tag="wEsol_00282"
CDS complement(1854..2195)
/locus_tag="wEsol_00282"
/codon_start=1
/transl_table=11
/fullproduct="qcoverage 100 , hcoverage 100 , similarity
100 , identity 100 , evalue 1.53e-79 , alnlength 113 ,
Bacteria , Proteobacteria , AAS13810.1 transposase, IS5
family, OrfB [Wolbachia endosymbiont of Drosophila
melanogaster]"
/cog="COG3293 COG3293 124 Transposase and inactivated
derivatives"
/pfam="DDE_Tnp_1_2 DDE_Tnp_1"
/product="transposase, IS5 family, OrfB"
/translation="MRTKYTKVKKMWADMGYQGRNLKNHIKEEYDIDIEIVKRPPCRF
WVHKDTPPELLPTREQGFKVQPRRWVVERTFAWVNRNRRLSKEYDLLTTSTENFIYLA
MSRVMLKREYA"
/besthit="qcoverage 100 , hcoverage 100 , similarity 100
, identity 100 , evalue 1.53e-79 , alnlength 113 ,
Bacteria , Proteobacteria , AAS13810.1 transposase, IS5
family, OrfB [Wolbachia endosymbiont of Drosophila
melanogaster]"
gene complement(2306..2686)
/locus_tag="wEsol_00283"
CDS complement(2306..2686)
/locus_tag="wEsol_00283"
/codon_start=1
/transl_table=11
/fullproduct="qcoverage 100 , hcoverage 100 , similarity
100 , identity 100 , evalue 1.16e-87 , alnlength 126 ,

```

Bacteria , Proteobacteria , AOV87106.1 transposase  
 [Wolbachia endosymbiont of Drosophila incompta]"  
 /cog="COG3293 COG3293 124 Transposase and inactivated  
 derivatives"  
 /pfam="DUF4096"  
 /product="transposase"  
 /translation="MRKKYPTDLSEREWARIEKHFRVSYKKGGRPPKYSKREILEAIF  
 YVLRITGCQWRYLPNDFPLWKTVYEQFRQWKKQGIFEKMNYEITKYSRRKIGRNEQPSA  
 CIVDSQSVKTTEKGGSKAMMEVKK"  
 /besthit="qcoverage 100 , hcoverage 100 , similarity 100  
 , identity 100 , evalule 1.16e-87 , alnlength 126 ,  
 Bacteria , Proteobacteria , AOV87106.1 transposase  
 [Wolbachia endosymbiont of Drosophila incompta]"

# ORIGIN

|      |             |             |             |             |             |             |
|------|-------------|-------------|-------------|-------------|-------------|-------------|
| 1    | aagtaaatga  | taaaggtata  | ataagctatt  | tgagttataa  | tggcgtatag  | tgtggattta  |
| 61   | agggaaaggg  | cagtatcgat  | gatagaaaaa  | gggaagtcaa  | aggttgaggt  | ggcagagctt  |
| 121  | ttggagatag  | gaatagcaac  | tctgtaccgc  | tggttaagaa  | agaaagccgc  | tggtgaaagc  |
| 181  | ctaaggccat  | cgaaaaacgg  | cagcttttatt | cgaaaaatag  | acccaaaaat  | actcgaagaa  |
| 241  | tatgttaaaa  | agaatccaga  | tcatacgctg  | gcagagatga  | aacaaaatct  | tggatttgga  |
| 301  | ataaattcaa  | tttggtatag  | gctgaaacag  | ctaagaatta  | ctttaaaaaa  | aagttacact  |
| 361  | atatcaagag  | cgcaatcaag  | aagataggca  | gcgatttacc  | gataaaatct  | caaaaaataga |
| 421  | ccattccagc  | atcttatata  | tagatgaagc  | aggagttgat  | aataggttat  | accgagagta  |
| 481  | tggacgtgct  | ccaataggaa  | agaaaattta  | tgcagatatt  | ccaggaagaa  | aacgagagag  |
| 541  | aatcagtata  | ataggcgggg  | ggattggaaa  | gagatttatt  | gcaccaatga  | ctttcaaagg  |
| 601  | tgggtgtgac  | aaagaggtat  | tcaatacatg  | gtagagagaag | atgttattac  | ctaaattgcc  |
| 661  | acatgggtact | acaatagtta  | tggacaatgc  | cacattccat  | aaaactccca  | aaacaaagga  |
| 721  | gttaatagat  | aatgctagat  | gccgtttgct  | ctatctacca  | acatattcac  | cagatttgaa  |
| 781  | ccctatagag  | cattgttgga  | ataccatcaa  | aagccgcctc  | agacctttaa  | tgcataaata  |
| 841  | tacagactta  | caacttttgg  | ttggtaatac  | cataatggaa  | atttatcatt  | catttttagaa |
| 901  | aatactataa  | gagggttgtcc | ggaaactagt  | aaattcaagc  | atattccctc  | tttaacataa  |
| 961  | ccctactcat  | agctaggtat  | atgaaattct  | cagtggatgt  | tgtgagtaaa  | tcatactcct  |
| 1021 | tcgatagcct  | tctattccta  | ttaacccaag  | caaaagtcct  | ttctacaacc  | catcttcttg  |
| 1081 | gctgtacttt  | aaacccttgt  | tctcttggtg  | gtagtagctc  | aggtggcgta  | tctttgtgca  |
| 1141 | cccaaaatct  | acatggaggc  | cttttaacaa  | tttcaatatc  | tatgtcatat  | tcttccttta  |
| 1201 | tgtgattcct  | taaatttctt  | ccttggtatc  | ccatgtcagc  | ccacattttt  | ttaacttttag |
| 1261 | tatattttgt  | tctcatattg  | tttaatgcta  | ttttaataacc | atctctatca  | ttttcgttag  |
| 1321 | cagcgcctac  | gtaacaacct  | agtataaaaac | cctgagtgct  | tgtaattata  | tgcccttttc  |
| 1381 | taccctttac  | ttttttactt  | ccatcatagc  | ctttgatccc  | cccttttctg  | tagtctttac  |
| 1441 | agattgacta  | tctactatac  | aggcactcgg  | ctgctcattc  | cttcctatatt | ttcttctact  |
| 1501 | atatttttga  | atttcataat  | tcattttctc  | aaaaattccc  | tgcttcttcc  | attgacctgaa |
| 1561 | ctgctcatac  | acagtcttcc  | atagcggaaa  | atcatttggt  | aaataccgcc  | attgacaccc  |
| 1621 | tgtacgcaat  | acatagaaaa  | ttgcttctaa  | tattttctct  | ttgctataact | ttggcggcct  |
| 1681 | tcctcctttc  | ttgtatgata  | ctctgaagtg  | tttttctatt  | cttgcccatt  | ccctttcgct  |
| 1741 | tagatctggt  | ggatactttt  | ttctcatctt  | taccccgtag  | taaaatttca  | gatattatag  |
| 1801 | ccttttactt  | atttccggac  | aacctctaag  | aggttggtccg | gaaactagta  | aattcaagca  |
| 1861 | tattccctct  | ttaacataac  | cctactcata  | gctaggtata  | tgaaattctc  | agtggatggt  |
| 1921 | gtgagtaaat  | catactcctt  | cgatagcctt  | ctattcctat  | taacccaagc  | aaaagtcctt  |
| 1981 | tctacaaccc  | atcttcttgg  | ctgtacttta  | aacccttggt  | ctcttggttg  | tagtagctca  |
| 2041 | ggtggcggtat | ctttgtgcac  | ccaaaatcta  | catggaggcc  | ttttaacaat  | ttcaatatct  |
| 2101 | atgtcatatt  | cttcctttat  | gtgattcttt  | aaatttcttc  | cttggtatcc  | catgtcagcc  |
| 2161 | cacatttttt  | taacttttagt | atattttggt  | ctcatattgt  | ttaatgctat  | tttaataacca |
| 2221 | tctctatcat  | tttcggttagc | agcgcctacg  | taacaacctc  | gtataaaaacc | ctgagtgtct  |
| 2281 | gtaattatat  | gcctttttct  | accctttact  | tttttacttc  | catcatagcc  | tttgatcccc  |
| 2341 | ccttttctgt  | agtctttaca  | gattgactat  | ctactataca  | ggcactcggc  | tgctcattcc  |
| 2401 | ttcctatttt  | tcttctacta  | tattttgtaa  | tttcataatt  | catttttctca | aaaattccct  |
| 2461 | gcttcttcca  | ttgcctgaac  | tgctcataca  | cagtcttcca  | tagcggaaaa  | tcatttggtga |
| 2521 | aataccgccca | ttgacaccct  | gtacgcaata  | catagaaaat  | tgcttctaat  | attttctctt  |
| 2581 | tgctatactt  | tggcggcctt  | cctcctttct  | tgtatgatac  | tctgaagtggt | ttttctattc  |
| 2641 | ttgcccattc  | ccttttcgctt | agatctgttg  | gatacttttt  | tctcatcttt  | accccgtagt  |
| 2701 | aaaatttcag  | atatttatagc | cttttactta  | tttccggaca  | acctctaagt  | ggtggtgcaa  |

```

2761 ttattggagc agctatagca taccttgacg gagctgccac tttagctcct gctattgttg
2821 ctgttgacgt atttattgca gccactgttg ttggtgcact ggtgggttac ggtattggaa
2881 aatcttgtga aaaggtcagt gaagaaaggc aaaaggatcg ccatatgagc ataggtactg
2941 tgattaagaa tgtccttact cctgagtgtt taaaatcaca atcgcaagtt catccataag
3001 gtaggcattt agtattgact ttacaacaat agtcact

```

//

```

LOCUS      JAQZAU010000038          14144 bp    dna        linear    ENV 17-MAR-2023
DEFINITION MAG: Wolbachia pipientis isolate wEsol contig_30611, whole genome
            shotgun sequence.
ACCESSION  JAQZAU010000038  JAQZAU010000000
VERSION    JAQZAU010000038.1
DBLINK     BioProject: PRJNA929258
            BioSample: SAMN33142973
KEYWORDS   WGS; ENV; Metagenome Assembled Genome; MAG.
SOURCE     Wolbachia pipientis (insect metagenome)
  ORGANISM Wolbachia pipientis
            Bacteria; Pseudomonadota; Alphaproteobacteria; Rickettsiales;
            Anaplasmataceae; Wolbachieae; Wolbachia.
REFERENCE  1  (bases 1 to 14144)
  AUTHORS  Fiutek,N., Couger,B.M., Roy,S., de la Torre,J.R. and Connor,E.F.
  TITLE    Genomic assessment of the contribution of the Wolbachia
            endosymbiont of Eurosta solidaginis to gall-induction
  JOURNAL  International Journal Molecular Sciences
REFERENCE  2  (bases 1 to 14144)
  AUTHORS  Fiutek,N., Couger,B.M., Roy,S., de la Torre,J.R. and Connor,E.F.
  TITLE    Direct Submission
  JOURNAL  Submitted (10-FEB-2023) Biology, San Francisco State University,
            1600 Holloway Ave, San Francisco, CA 94132, USA
COMMENT    ##Genome-Assembly-Data-START##
            Assembly Date           :: JUN-2019
            Assembly Method          :: FLYE v. 06-2019
            Genome Representation     :: Full
            Expected Final Version    :: Yes
            Genome Coverage           :: 100.0x
            Sequencing Technology     :: Illumina HiSeq; PacBio Sequel
            ##Genome-Assembly-Data-END##
FEATURES   Location/Qualifiers
    source  1..14144
            /organism="Wolbachia pipientis"
            /mol_type="genomic DNA"
            /submitter_seqid="contig_30611"
            /isolate="wEsol"
            /isolation_source="galls on Solidago altissima"
            /host="Eurosta solidaginis MN-2018-EFC"
            /db_xref="taxon:955"
            /environmental_sample
            /country="USA: Cowling Arboretum, Carleton College,
            Northfield, MN"
            /lat_lon="44.48 N 93.13 W"
            /altitude="280 m"
            /collection_date="2018-11"
            /metagenome_source="insect metagenome"
            /note="metagenomic"
    gene    91..279
            /locus_tag="wEsol_00284"
    CDS     91..279
            /locus_tag="wEsol_00284"
            /codon_start=1
            /transl_table=11
            /fullproduct="qcoverage 100 , hcoverage 100 , similarity

```

```

100 , identity 100 , evalue 1.00e-36 , alnlength 62 ,
Bacteria , Proteobacteria , AOV87641.1 hypothetical
protein WG67_03920 [Wolbachia endosymbiont of Drosophila
incompta]"
/translation="MRYLTVMSIIAWRIFFITSIARANPTLPCTTLAEEEWKVLVVK
IHRKPCPSVVPNIKEAVS"
/product="hypothetical protein"
/besthit="qcoverage 100 , hcoverage 100 , similarity 100
, identity 100 , evalue 1.00e-36 , alnlength 62 ,
Bacteria , Proteobacteria , AOV87641.1 hypothetical
protein WG67_03920 [Wolbachia endosymbiont of Drosophila
incompta]"
gene 567..2180
/locus_tag="wEsol_00285"
CDS 567..2180
/locus_tag="wEsol_00285"
/codon_start=1
/transl_table=11
/fullproduct="qcoverage 100 , hcoverage 100 , similarity
100 , identity 100 , evalue 2.04e-309 , alnlength 537 ,
Bacteria , Proteobacteria , WP_141457261.1 MULTISPECIES:
hypothetical protein [unclassified Wolbachia]"
/translation="MNNPFKSENYKKNLDSLKAVKLGNAEKQYNKTLRDLSHALEGF
TGEAKGIAEFVIYTDLNNYVEQPLGLFKTLMNRILGKNFPTKNSSISNFMNDELSSFT
LETAAYTRILKKIDLLEQLEKDFRKNNILKDSLNLQSEKSQGKDRSHEVSLEGRKQ
KEGTFELRKEEQPKEKLGGNMRQIKRPTTAPPAAPDSRKVRFKSEISSDGESKAKST
SSLLKGANSFSPDAKENPSEDSGYESSLDQGSEYEDISNYQEKKQKENPLYEQREDS
GYGSSLNEESVYKEISNYQEKKSKILIENSQSSKSPKEEPIYATVPKEHIEAKRERKQ
KQQPQSLVPPKPPQVPKKMFTTGQEVQRQESKVVIKDKPAVPPKPKNLSRANQKVSTEP
KVVGVILKKSARVPLESENQDNRKSAQKAAGKAIPKVAAATMKGGANREMGSKVKAL
KEKFEQNQAKGNANVQLAESKTTTAAQADIGVKKKQSHSFLTENKRSATKHVTAKSDP
KSHISKNSLLTHANVKEMVAQIEKGKGGR"
/product="hypothetical protein"
/besthit="qcoverage 100 , hcoverage 100 , similarity 100
, identity 100 , evalue 2.04e-309 , alnlength 537 ,
Bacteria , Proteobacteria , WP_141457261.1 MULTISPECIES:
hypothetical protein [unclassified Wolbachia]"
gene 2358..2705
/locus_tag="wEsol_00286"
CDS 2358..2705
/locus_tag="wEsol_00286"
/codon_start=1
/transl_table=11
/fullproduct="qcoverage 100 , hcoverage 100 , similarity
100 , identity 100 , evalue 7.86e-74 , alnlength 115 ,
Bacteria , Proteobacteria , WP_022626382.1 MULTISPECIES:
IS630 transposase-related protein [Wolbachia]"
/cog="COG3415 COG3415 138 Transposase and inactivated
derivatives"
/pfam="HTH_Tnp_IS630 HTH_Tnp_1 HTH_23 HTH_28 HTH_29 HTH_7
CENP-B_N Pfam-B_14738 HTH_17 HTH_32"
/product="IS630 transposase-related protein"
/translation="MVYSVDLREKAVSLVEKGKSKVEVAEVFEIGIATLYRWLKKKAT
GQGLKAVKSTGFIRKIDPEILKEYVKKHPDHTLAEMQNGLGFGISAIWYRLRQLKITF
KKSHILSRAQSRR"
/besthit="qcoverage 100 , hcoverage 100 , similarity 100
, identity 100 , evalue 7.86e-74 , alnlength 115 ,
Bacteria , Proteobacteria , WP_022626382.1 MULTISPECIES:
IS630 transposase-related protein [Wolbachia]"
gene 2873..3208

```

CDS

```

/locus_tag="wEsol_00287"
2873..3208
/locus_tag="wEsol_00287"
/codon_start=1
/transl_table=11
/fullproduct="qcoverage 100 , hcoverage 100 , similarity
100 , identity 100 , evalue 1.17e-82 , alnlength 111 ,
Bacteria , Proteobacteria , WP_049973597.1 MULTISPECIES:
transposase [Wolbachia]"
/cog="COG3335 COG3335 132 Transposase and inactivated
derivatives"
/pfam="DDE_3 DDE_1"
/product="transposase"
/translation="MDEKFIAPMTFTGGCNKDIFNVWLERRLLPQLQRD TTIVMDNAT
FHKTPKTKSLIESFGCHLLYLPTYSPDLNPIEHCWHTIKSCLRPLMHQCTDLHLLVGN
TILDVYHSF"
/besthit="qcoverage 100 , hcoverage 100 , similarity 100
, identity 100 , evalue 1.17e-82 , alnlength 111 ,
Bacteria , Proteobacteria , WP_049973597.1 MULTISPECIES:
transposase [Wolbachia]"

```

gene

CDS

```

complement(3625..5055)
/locus_tag="wEsol_00288"
complement(3625..5055)
/locus_tag="wEsol_00288"
/codon_start=1
/transl_table=11
/fullproduct="qcoverage 100 , hcoverage 100 , similarity
100 , identity 100 , evalue 0.0 , alnlength 476 ,
Bacteria , Proteobacteria , WP_012673305.1 MULTISPECIES:
2-polyprenylphenol 6-hydroxylase [Wolbachia]"
/cog="AarF COG0661 517 Predicted unusual protein kinase"
/pfam="ABC1 RIO1 Pfam-B_14148 APH"
/tigr="TIGR01982 UbiB 436 2-polyprenylphenol
6-hydroxylase"
/product="2-polyprenylphenol 6-hydroxylase"
/translation="MIQNILRLLHITTVLTRYNILPYLLPPSKKSINKIQGHKLKCAL
EKLGPVFIKFGQSISSRTDVLNEDITNNLLLICDRLPSFSHKIAVKTIESEFNCKLSD
IFSSFSEKPIAAASISQVHRAVTTEGKEVAVKVLRPNIEKTFSRDIKMLSWLAEIAEK
FSEQSKRLRPIELVKTF AEICRLELDLRF EAAHSSSELKENTKNDRGFYVPEIDWNRTA
KKVLTLEWIEATPIYEVEKLN NHKQIAINLIESFCNQVYRDCFFHADMHGPNLMVDSN
NNIIALDCGIMGRIDRETCYYVIEILKGFLNRD YDHVAKMHFKAGYVSSQHRNFVTAC
RAIGEPIIGQPIQKISFASLLAQLLKITGDFDMKVQTQLLLLQKTMILLEGTCRKIYP
EINMWKVVEAWISSQHESKIGYREKIRSSYPVKTIQGIFSLIEKLNLIADKKLENIQI
KNKSNGKVYFLLWFVIIILIVKLLIS"
/besthit="qcoverage 100 , hcoverage 100 , similarity 100
, identity 100 , evalue 0.0 , alnlength 476 , Bacteria ,
Proteobacteria , WP_012673305.1 MULTISPECIES:
2-polyprenylphenol 6-hydroxylase [Wolbachia]"

```

gene

CDS

```

complement(5052..5747)
/locus_tag="wEsol_00289"
complement(5052..5747)
/locus_tag="wEsol_00289"
/codon_start=1
/transl_table=11
/fullproduct="qcoverage 100 , hcoverage 93.9024390243902
, similarity 100 , identity 99.6 , evalue 1.01e-154 ,
alnlength 231 , Bacteria , Proteobacteria ,
WP_015589282.1 MULTISPECIES: metal ABC transporter
ATP-binding protein [unclassified Wolbachia]"
/cog="ZnuC COG1121 254 ABC-type Mn/Zn transport systems,

```

```

ATPase component"
/pfam="Arch_ATPase AAA_15 IstB_IS21 Pfam-B_16450 SMC_N
AAA_21 ABC_tran AAA_21 Pfam-B_17981 Pfam-B_10459 AAA_15"
/tigr="TIGR03265 PhnT2 353 putative
2-aminoethylphosphonate ABC transporter, ATP-binding
protein"
/product="metal ABC
transporter ATP-binding protein"
/translation="MNNVNNRVLKIENLALTYDGKRILDNINMFMERGDIITILGPNG
GGKTSLVKAIAGINKSCTGNIVFADNIKIGYMPQNFSISNLMPITVEYFLLNSSLKRL
KKNQSIITETIELVSIGNILKNQVLEISAGQTQLLLARCLIAEPDLIILDEPVSAMD
INARAKFYDIINKIAKKRLVSILMTSHDLNSALPSSDYIICINNTIYCQGKPDEIMKN
RTLNEIFSSYAAK"
/besthit="qcoverage 100 , hcoverage 93.9024390243902 ,
similarity 100 , identity 99.6 , evalue 1.01e-154 ,
alnlength 231 , Bacteria , Proteobacteria ,
WP_015589282.1 MULTISPECIES: metal ABC transporter
ATP-binding protein [unclassified Wolbachia]"
gene 5784..6665
/locus_tag="wEsol_00290"
CDS 5784..6665
/locus_tag="wEsol_00290"
/codon_start=1
/transl_table=11
/pfam="SBP_bac_9"
/fullproduct="qcoverage 100 , hcoverage 100 , similarity
100 , identity 100 , evalue 1.16e-201 , alnlength 293 ,
Bacteria , Proteobacteria , WP_012673303.1 MULTISPECIES:
zinc ABC transporter substrate-binding protein
[Wolbachia]"
/translation="MRHLLTFFLLLSFTLYYNIAFSSNLKVVATIKPIHSLVASITEG
ILEPELLGYATSAHNYILKPSDASNLESSDVIFYVDDNLETFTVQTFAKNNKELVQLSK
AINLLPTRPHSFSRKITHIKDEKDLHIWLSPENAKSMILSVSATLSNIDKENSHPYNS
NATKAIAKKIDQEVKEIMKELNDFKNQKYIVTHDAYQYFEKYFGLNHPSAILSIEEDSY
IGMRSLMKLKKIMKEENVKCIFAHSQEDSIKPINALSNDAKMVVLDPIGSDIEPGKDAY
LAIINNIAQNFKSCFVE"
/product="zinc ABC
transporter substrate-binding protein"
/besthit="qcoverage 100 , hcoverage 100 , similarity 100
, identity 100 , evalue 1.16e-201 , alnlength 293 ,
Bacteria , Proteobacteria , WP_012673303.1 MULTISPECIES:
zinc ABC transporter substrate-binding protein
[Wolbachia]"
gene complement(6722..6997)
/locus_tag="wEsol_00291"
CDS complement(6722..6997)
/locus_tag="wEsol_00291"
/codon_start=1
/transl_table=11
/fullproduct="qcoverage 100 , hcoverage 100 , similarity
100 , identity 100 , evalue 4.43e-53 , alnlength 91 ,
Bacteria , Proteobacteria , WP_010082632.1 MULTISPECIES:
XRE family transcriptional regulator [Wolbachia]"
/cog="COG5606 COG5606 91 Uncharacterized conserved small
protein"
/pfam="HTH_37"
/product="XRE family
transcriptional regulator"
/translation="MQNLQLSYPIIVELGDVKDTKLKLIKVIAQLISKKYTTQKKAAN
ALKIDQPKVSQINRSKIEGFSLEYLLNLLIVLGQDINVRIKHNSKPA"

```

```

/blasthit="qcoverage 100 , hcoverage 100 , similarity 100
, identity 100 , evalue 4.43e-53 , alnlength 91 ,
Bacteria , Proteobacteria , WP_010082632.1 MULTISPECIES:
XRE family transcriptional regulator [Wolbachia]"
gene complement(7023..7223)
/locus_tag="wEsol_00292"
CDS complement(7023..7223)
/locus_tag="wEsol_00292"
/codon_start=1
/transl_table=11
/fullproduct="qcoverage 100 , hcoverage 100 , similarity
100 , identity 100 , evalue 6.32e-35 , alnlength 66 ,
Bacteria , Proteobacteria , WP_015589280.1 MULTISPECIES:
50S ribosomal protein L33 [Wolbachia]"
/cog="RpmG COG0267 50 Ribosomal protein L33"
/pfam="Ribosomal_L33"
/tigr="TIGR01023 rpmG_bact 56 ribosomal protein L33"
/product="50S ribosomal
protein L33"
/translation="MAKKNASLLVKLVSTAIKTTKTGEEKSTGYFYVKKRNPKKLTCK
LEFRKYDPVRRHVLFKEEKLK"
/blasthit="qcoverage 100 , hcoverage 100 , similarity 100
, identity 100 , evalue 6.32e-35 , alnlength 66 ,
Bacteria , Proteobacteria , WP_015589280.1 MULTISPECIES:
50S ribosomal protein L33 [Wolbachia]"
gene 7373..9145
/locus_tag="wEsol_00293"
CDS 7373..9145
/locus_tag="wEsol_00293"
/codon_start=1
/transl_table=11
/fullproduct="qcoverage 100 , hcoverage 100 , similarity
100 , identity 100 , evalue 0.0 , alnlength 590 ,
Bacteria , Proteobacteria , WP_007549119.1 MULTISPECIES:
Rne/Rng family ribonuclease [unclassified Wolbachia]"
/cog="CafA COG1530 487 Ribonucleases G and E"
/pfam="S1 RNase_E_G"
/tigr="TIGR00757 RNaseEG 415 ribonuclease, Rne/Rng
family"
/product="Rne/Rng family
ribonuclease"
/translation="MVNSGKRLLLIENSTCSNEVRVALSVNNKVVEFEQEFKEKKQLR
GNIYVAYIKRIEPSLQAVFIEYGKNKQGFLSFSEISLDYFNIPEKEKETIFESYSNDD
YTEKGNDTIANVSSDSAASKNVNESGSGFVREVPLYKKYKLQDVISVNQKVLVQLTKE
ERGNKGASFTTYITLVGRYCVFMPNSMSKGGVSRRIEDANVRKQLKEILSSINLPKRS
GLIVRTVGSGKNKKEIEQDYNLSSLWQSIQKNAFSVNVPSLIYNEADVIMRSVRDFC
SDGIEVIVSGKEAFEAVRQYANNALKGSKLRYRLYRGYAPIFTYYGIEDQISELYSNR
VELPSGGSLIITLTEAFVSIDVNSGKMTGEDSIEETAYRTNMEAVPEISRQVNLRLGLS
GLIVVDFIDMLKYQYCRAVESAIAKQAFKDDKAKVQFSYINDFGLMVFSRQRIKPNIQE
INTTECLHCKGTGRVKSNEVIVSSILRDLQHIANKNRNKSFDLVAHSAVIAHIFNNKR
NTVSTIEKEFNITLNVSIDNSLDVNTFVLKQGDDVNLNGYKPLQNSGYQIGDSSNEEA
DNSNKLRLGNFWLTKWLSRLSSNN"
/blasthit="qcoverage 100 , hcoverage 100 , similarity 100
, identity 100 , evalue 0.0 , alnlength 590 , Bacteria ,
Proteobacteria , WP_007549119.1 MULTISPECIES: Rne/Rng
family ribonuclease [unclassified Wolbachia]"
gene 9232..11154
/locus_tag="wEsol_00294"
CDS 9232..11154
/locus_tag="wEsol_00294"

```

```

/codon_start=1
/transl_table=11
/fullproduct="qcoverage 100 , hcoverage 100 , similarity
100 , identity 100 , evalue 0.0 , alnlength 640 ,
Bacteria;Eukaryota , Proteobacteria;Arthropoda ,
WP_012673300.1 MULTISPECIES: molecular chaperone DnaK
[unclassified Wolbachia]"
/cog="DnaK COG0443 579 Molecular chaperone"
/pfam="HSP70 MreB_Mbl"
/tigr="TIGR02350 prok_dnaK 596 chaperone protein DnaK"
/product="molecular
chaperone DnaK"
/translation="MGRAIGIDLGTNSCVAIMQGKDTKVIENTKEGARTTPSIVALTS
SGERLIGAPAKRQATTNASNTFFATKRLIGRQYSDPEMKNLSVPYKVFAAKSGDAWVK
TTDNKEYSPSQIGAFILQNMKEAAEAYLGEEVKDAVITVPAYFNDSQRQATKDAGKIA
GLNVLIRIVNEPTAAALAYGLDKKHGHTIVVYDLGGGTFDVSILEIGDGVFEVKATNGD
THLGGEDFDNGVVS YLLDEFKKSNGIDLKNDPMAMQRIKEAAEKAKIELSSAMETEIN
LPFITADASGPKHLNMKLTRAKLESLVNDLIERTMAPCKKALEDAGLSASQIGEVVLV
GGMTRMPKVIEKVKEFFGKDPHRGVNPDEVVAIGAAIQAGIIQGDVRDVLVLLDVTPLS
LGIETLGGVFTPLIERNTTIPTKKSQVFSTAEDNQTAVTIKVHQGERKLAVDNKLGLGQ
FSLEGIPAPRGR PQIEVTFDIDANGIAHVSAKD KATGKEQKIRIQSSGGLSDDEINR
MVKEAEEKAQEDEKRKFFIEVKNQADSLVHSTESL TEYGDKVSPEDRSAIENAVNEL
KEVSKSDNIDDADSIQQVTNLSQLSMKLGEAMYQASQQNSAENGFSSEGNPN DKEEK
VVDS DYQDIDNKEENK"
/besthit="qcoverage 100 , hcoverage 100 , similarity 100
, identity 100 , evalue 0.0 , alnlength 640 ,
Bacteria;Eukaryota , Proteobacteria;Arthropoda ,
WP_012673300.1 MULTISPECIES: molecular chaperone DnaK
[unclassified Wolbachia]"
gene 11225..11509
/locus_tag="wEsol_00295"
CDS 11225..11509
/locus_tag="wEsol_00295"
/codon_start=1
/transl_table=11
/fullproduct="qcoverage 100 , hcoverage 100 , similarity
100 , identity 100 , evalue 2.94e-57 , alnlength 94 ,
Bacteria , Proteobacteria , WP_007549117.1 MULTISPECIES:
Bola family transcriptional regulator [Wolbachia]"
/cog="Bola COG0271 90 Stress-induced morphogen (activity
unknown)"
/pfam="Bola"
/product="Bola family
transcriptional regulator"
/translation="MDIIKTIEEKIHDSIDVIDINIIDESAKHADHYFASSSTLPSHI
KLILISDSFIGMNTLKRHKLIYELLKSEIELIHAISLHLYTQNEYNLKNK"
/besthit="qcoverage 100 , hcoverage 100 , similarity 100
, identity 100 , evalue 2.94e-57 , alnlength 94 ,
Bacteria , Proteobacteria , WP_007549117.1 MULTISPECIES:
Bola family transcriptional regulator [Wolbachia]"
gene 11517..12758
/locus_tag="wEsol_00296"
CDS 11517..12758
/locus_tag="wEsol_00296"
/codon_start=1
/transl_table=11
/fullproduct="qcoverage 100 , hcoverage 100 , similarity
100 , identity 100 , evalue 7.91e-306 , alnlength 413 ,
Bacteria , Proteobacteria , WP_012673299.1 MULTISPECIES:
cystathionine beta-lyase [unclassified Wolbachia]"

```

/cog="MetC COG0626 396 Cystathionine  
beta-lyases/cystathionine gamma-synthases"  
/pfam="Cys\_Met\_Meta\_PP Aminotran\_1\_2 Aminotran\_5"  
/tigr="TIGR01324 cysta\_beta\_ly\_B 377 cystathionine  
beta-lyase"  
/product="cystathionine  
beta-lyase"  
/translation="MKEESLLVKAGRKF KDYKGSMNPPVYHSSSTILFPTYKDYLNAAN  
GESIYDVINDDVARDYSYSNVGTPTVHYFSNALAEIEGSGQALIFPSGLFALTFAILT  
FTKAGSHVLIQDNSYYRLKRFAENELPNRGIEVTFYDPTQDITDLIQSNTSLIMIETP  
GSVTFEISNIEHIVKVAKEGIVTVCDNSWATPLLFKPLDYGIDVALYAVTKYLAGHS  
DLLMGTMIAEGEIFKLLYESYKNYGVTIQSHDCYLAHRGLRTLHTRMKKYQNTAMEVA  
KWLEAQQKVRKVLYPALPSHPQHELWKS YFKGASGVFSIVL GREYSCEELSCMVDHMK  
IFGIGASWGGCDLILPIDRRSMSR SVMNSDYGGSFIRIFCGLEDPEDLIFDLNDALK  
RLPCLDFQNDVEVG HETERITA"  
/besthit="qcoverage 100 , hcoverage 100 , similarity 100  
, identity 100 , eval 7.91e-306 , alnlength 413 ,  
Bacteria , Proteobacteria , WP\_012673299.1 MULTISPECIES:  
cystathionine beta-lyase [unclassified Wolbachia]"

gene

CDS

12733..>14144  
/locus\_tag="wEsol\_00297"  
12733..>14144  
/locus\_tag="wEsol\_00297"  
/codon\_start=1  
/transl\_table=11  
/fullproduct="qcoverage 100 , hcoverage 97.7130977130977  
, similarity 100 , identity 100 , eval 0.0 , alnlength  
470 , Bacteria , Proteobacteria , WP\_015589277.1  
MULTISPECIES:  
UDP-N-acetylmuramoyl-L-alanyl-D-glutamate--2,6-  
diaminopimelate ligase [unclassified Wolbachia]"  
/cog="MurE COG0769 475 UDP-N-acetylmuramyl tripeptide  
synthase"  
/pfam="Mur\_ligase\_M Mur\_ligase\_C"  
/tigr="TIGR01085 murE 472 UDP-N-acetylmuramyl-tripeptide  
synthetase"  
/product="UDP-N-acetylmuramoyl-L-alanyl-D-glutamate--2,6-  
diaminopimelate ligase"  
/translation="MKLRELLHNIIDVNF DIEIKGVTCNPKKIKEGYLFVCV SERDRI  
YIDQILSCGAKAIIASDCITEASSLGIIPTRDAGICIFHPNPQEIYSEIVSRFYQFKQ  
PKYVAAVTGTNGKTSVVEFCRQIWQNSGYNAASIGTLGTCINNGRKGNSNSLTTPGAE  
DLYATLRGISVEHLVLESSHGIDQYRIHGLKLSAAFTNFSQDHL DYHKS LGGYLET  
KKRLFYEVLP EGKTAILNADIDEYGALLKIAEKRSNKVV TYGKKGSDITLLEQIPTPS  
GQYLTVKVDNQIYNTFFPV LGKFQAYNLLCAIGISGLNYREICVDKLI FPSGRMEKVK  
PFAFVDYAHTPSALKQALLSLKWHFNKKIVLVFGCGGNRDQTKRAEMGKVAQIYADKV  
IITDDNPRDENPAEIRRGILLHCPDALEIEDRREAIEKGVDIAYNEGMILLVAGKGHE  
GYQIVSGQTFEFS DVEVIKN"  
/besthit="qcoverage 100 , hcoverage 97.7130977130977 ,  
similarity 100 , identity 100 , eval 0.0 , alnlength  
470 , Bacteria , Proteobacteria , WP\_015589277.1  
MULTISPECIES:  
UDP-N-acetylmuramoyl-L-alanyl-D-glutamate--2,6-  
diaminopimelate ligase [unclassified Wolbachia]"

ORIGIN

1 ttgccttaga tggaaaatag agatattaca taaaatttta aattcggtct caaagttgaa  
61 gaatgtaggc ttggaatagc agaaagacta atgagatata taacagttat gagtattatt  
121 gcttgaggga tcttctttat tacatcaatt gcaagagcta acccaacatt accatgtact  
181 accttattag ctgaagaaga atggaaagtt ttatacgtta aaatacacag aaaaccatgt  
241 ccaagtgtag ttccaacat aaaagaagct gtttcatgaa cttggaggcc atttagcaag

|      |             |             |             |             |             |             |
|------|-------------|-------------|-------------|-------------|-------------|-------------|
| 301  | aaaaaatgac  | ccaaaaccag  | gaccaattac  | tcttttgaaa  | ggatataaac  | gtctctttga  |
| 361  | tttagcagaa  | ggatggcgac  | ttgctcacga  | acctcatatt  | tgtgggtaat  | agtaagttgt  |
| 421  | taggggggac  | tggagatacc  | gcggcggtat  | gacgtaggga  | aatcttactt  | attatagcta  |
| 481  | tagttctaca  | tgaattacaa  | aagtaatat   | tactagatct  | taatatTTTT  | gatctatat   |
| 541  | ttaataaata  | atgagctgta  | attagtatga  | ataatccatt  | taaaagttag  | aactataaaa  |
| 601  | aaaatctcga  | ttctctgatc  | aaagctgtaa  | agctaggaaa  | tgcagagaaa  | caatataaca  |
| 661  | aaacgttaag  | ggatttatct  | catgcattag  | aagggttttac | aggtgaggca  | aaaggtatag  |
| 721  | ctgagtttgt  | tatatatact  | gacttgaaca  | attatgtaga  | acagccatta  | gggtcttttta |
| 781  | aaacattaat  | gaatagaatt  | ttgggaaaaa  | atTTTccaac  | caagaacagt  | agtataagta  |
| 841  | atTTTgtaaa  | tgatgagttg  | tcaagtttca  | ctttagaaac  | agcagctaag  | tatacaagaa  |
| 901  | TTTTaaaaaa  | aattgatctc  | ttggaacaat  | tagaaaaaga  | tttcagaaaa  | aataatatTT  |
| 961  | taaaagattc  | TTTTaaTTta  | gaacaaagt   | aaaagagtca  | aggaaaagat  | agatcacacg  |
| 1021 | aagttagttt  | ggaaggtaga  | aagcaaaagg  | aagggtacttt | tgagctgcga  | aaagaagaac  |
| 1081 | agccgaaaga  | aaaattaggt  | ggtaatcgca  | tgaggcaaat  | aaagcgacca  | acaacagcac  |
| 1141 | ctccggctgc  | tccagattcg  | aggaaggtac  | gctTTaaatc  | agaaatatcc  | tcagatggag  |
| 1201 | aaagcaaggc  | aaagtctaca  | tcttcttttac | taaaagggagc | taatagtttt  | agtatgcctg  |
| 1261 | atgctaagga  | aaatccttct  | gaggattcag  | gctatgaaa   | ttcatttagat | caggggtctg  |
| 1321 | aatatgaaga  | catatcaaat  | tatcaagaga  | aaaagcaaaa  | ggaaaatcct  | ttatatgagc  |
| 1381 | agagagaaga  | ttcaggctat  | ggaagttcat  | taaatgaaga  | gtctgtatac  | aaagagatat  |
| 1441 | caaattatca  | agagaagaag  | agtaaaattt  | taatagaaaa  | ttcgcagagt  | tcaaaatcgc  |
| 1501 | caaagaaga   | gccaatttat  | gcaacagttc  | ctaaagaaca  | tatagaagca  | aaaagagaac  |
| 1561 | gtaagcagaa  | acaacaacct  | caatccctcg  | taccaccaa   | accaccgcaa  | gtgccaaaaa  |
| 1621 | aatgttttac  | tactggtcaa  | gaagtttagac | agaatcgaa   | agtggtaatc  | aaagataaac  |
| 1681 | ctgcagtacc  | gccaaagcct  | aaaaatctaa  | gccgtgctaa  | tcaaaaagta  | agcacagagc  |
| 1741 | caaagtagt   | aggagtaatt  | cttaaaaaat  | cagctgaaag  | agtaccacta  | gaatctgaaa  |
| 1801 | atcaagacaa  | taggaaatca  | gcacaaaaag  | ctgctggtaa  | ggcgatacca  | aaagtagcag  |
| 1861 | cagctactat  | gaaaggagga  | gctaatcgcg  | agatgggcag  | taaagtaaag  | gcattaaaag  |
| 1921 | aaaaatttga  | gcaaaatcaa  | gcaaaaggaa  | atgctaattgt | acagcttgct  | gaaagcaaaa  |
| 1981 | ccactccagc  | agcacaagcg  | gatatcgggtg | tgaagaaaaa  | acaatctcat  | tcatttctaa  |
| 2041 | cagagaataa  | aagatctgca  | acgaaacacg  | taacagcaaa  | atctgatcca  | aaatctcata  |
| 2101 | tcagcaaaaa  | ttcccttctc  | acgcatgcaa  | atgtaaagga  | aatggttgca  | caaattgaga  |
| 2161 | aaggaaaaagg | aggaagatag  | taacattttgg | gaaaaaaaaca | tatgtgtcaa  | gtcaagagat  |
| 2221 | tgtgagcaaa  | tttaggaaat  | tatagctaaa  | ctgacttaga  | tttaccgaca  | atttgaaaaa  |
| 2281 | ccgtcattcc  | gctaactata  | gtattttcaa  | aagcgaatga  | taaaaggata  | atatgttttt  |
| 2341 | ttaaagtagg  | gaaagcgatg  | gtatatagt   | tagattttaag | ggaaaaagca  | gtgtctttgg  |
| 2401 | tagaaaaagg  | aaagtcaaa   | gttgaaagttg | cagagggtttt | tgagatagg   | atagcaacac  |
| 2461 | tatatagatg  | gctaaaaaag  | aaagctactg  | gccaaaggtct | caaagcggta  | aaaagtactg  |
| 2521 | gtttttattcg | aaaaatagat  | ccagaaatac  | tcaaagaata  | tgtcaaaaaa  | caccagatc   |
| 2581 | acacactagc  | agaaatgaaa  | caaaaccttg  | gctttgggat  | aagtgcaatt  | tggatatagat |
| 2641 | taagacagct  | aaaaataacc  | tttaaaaaaa  | gtcacatttct | atcaagagcg  | caatcaagaa  |
| 2701 | gataggcagc  | aattttatcga | taaagtctca  | aaaatagacc  | actgtagcat  | tttatatata  |
| 2761 | gatgaagcag  | gagttgataa  | tagactatac  | cgagaatatg  | cacgagctcc  | aagaggagaa  |
| 2821 | aaaatatatg  | ctgatgttcc  | aggaaaaaag  | cgggaaaagag | tgagtataat  | aggtggatga  |
| 2881 | gaagttttatt | gcaccaatga  | ccttcacagg  | aggggtgtaat | aaagatatat  | ttaatgtatg  |
| 2941 | gttagagcga  | agattacttc  | cacaattaca  | gcgtgatata  | accatagtta  | tggataatgc  |
| 3001 | tacattccat  | aaaactccca  | aaacaaagtc  | attaatagag  | tcttttgggt  | gtcatttgct  |
| 3061 | ttatcttcca  | acatattcac  | ctgatctaaa  | tccgatagag  | cattgttggc  | acaccatcaa  |
| 3121 | aagttgcctc  | agacctctaa  | tgcattcaatg | tacagactta  | caccttttag  | ttggtaatac  |
| 3181 | catttttagac | gtttatcatt  | cgttttagaa  | aatactatag  | ttgaaatagc  | gcagttactc  |
| 3241 | accccataaa  | tttgggtgctc | tctttcaatc  | aaaggtgtct  | tgctgcttga  | aatgttttct  |
| 3301 | ttgtaaaaaa  | ttggcttatc  | tttatatcat  | ctcattcaaa  | cagcattaac  | ataacttatg  |
| 3361 | cctttttttg  | atgtagaaat  | tttctaggaa  | ttgtcttttt  | gaattctatg  | gtattttgtt  |
| 3421 | taacattgaa  | acaggaggcc  | agtgtcacgc  | actggcatga  | caccattttg  | ttcctatagt  |
| 3481 | tgtcttttct  | cgtctacctt  | atTTTgccac  | tctgctgaac  | agatacataa  | agaaagtgga  |
| 3541 | aaattggaca  | ttctcaactc  | ggctcctgca  | gattaaaaat  | taagttgaat  | aaaaattgga  |
| 3601 | tttgacgcag  | ttttttccca  | tagtttaaga  | aattaaaagt  | ttaacgatta  | gaattataat  |
| 3661 | tacaaaccac  | aataaaaaat  | agacttttcc  | atTTtgattta | tttttaattt  | ggatgttttc  |
| 3721 | taattttttta | tcagctatta  | ggttcaattt  | ttctataagg  | ctaaatatcc  | cttggattgt  |
| 3781 | ttttacagga  | taagaacttc  | taattttttc  | cctataaccct | atTTTacttt  | catgttgact  |
| 3841 | gcttatccac  | gcttcaacta  | ctttccacat  | attgatttct  | gggtagatct  | ttctacatgt  |

|      |             |             |             |             |             |             |
|------|-------------|-------------|-------------|-------------|-------------|-------------|
| 3901 | cccttccagt  | aaaatcatag  | ttttctgcag  | caataacaat  | tgtgtttgaa  | ctttcatatc  |
| 3961 | aaaatcacca  | gttattttta  | atagctgagc  | aagtaaacta  | gcaaataaaa  | tcttctgtat  |
| 4021 | aggctgccc   | ataatgggtt  | cacctattgc  | cctgcaagct  | gtgacaaaat  | ttctatgctg  |
| 4081 | tgatgaaacg  | taaccagctt  | taaagtgc    | ttttgcaacg  | tgatcataat  | cccgatttaa  |
| 4141 | aaagcctttg  | agtatctcta  | taacgtaata  | gcatgtctca  | cgatctattc  | tacctatgat  |
| 4201 | tccacaatcc  | agagcaataa  | tattgttatt  | actatcaacc  | attagatttc  | caggatgcat  |
| 4261 | atcagcatga  | aaaaaacaat  | ccctgtatac  | ctgattacaa  | aacgattcta  | taagattgat  |
| 4321 | agctattttg  | ttatgattat  | tcagtttttc  | aacttcgtat  | attggcggtg  | cttctatcca  |
| 4381 | ttctaagtgt  | aaaacctttt  | ttgcagttct  | attccaatct  | atttcaggta  | cataaaaacc  |
| 4441 | tctgtcattt  | tttgtgtttt  | ccttttagttc | cgaagagtga  | gcagcttcaa  | aacgtagatc  |
| 4501 | taactcta    | cggcaaat    | cagcaaaagt  | tttaactaat  | tcaattggcc  | tcagcctttt  |
| 4561 | tgattgttcg  | ctaaattttt  | ctgcaatttc  | tgcaagccaa  | gaaagcattt  | ttatatctct  |
| 4621 | tgagaatgtt  | ttctcaatat  | ttggccttaa  | aaccttcaca  | gcaacttcct  | taccctcagt  |
| 4681 | tgtaaccgct  | ctatgcacct  | gagaaatcga  | tgctgctgca  | attggccttt  | cagaaaagct  |
| 4741 | tgaaaaaatg  | tcgctcaatt  | tacaattaaa  | ctcactttct  | atagttttta  | ctgctatttt  |
| 4801 | atgtgaaaat  | gatggcaatc  | tatcacatat  | caataacaag  | ttatttggtta | tatcttcatt  |
| 4861 | taaaacatca  | gtacgtgatg  | agatagactg  | cccaaactta  | atgaacaccg  | gacctaattt  |
| 4921 | ttcaagagca  | cacttttagct | tgtggccttg  | tatttttattt | attgattttt  | ttgatgggtg  |
| 4981 | aagtaaataa  | ggtaatatat  | tgtaacgcgt  | cagcaccgta  | gttatgtgca  | gaagacgcaa  |
| 5041 | aatattttga  | atcatttcgc  | tgcgtaactg  | ctaaatattt  | catttagggg  | tctatttttc  |
| 5101 | ataatctcat  | caggcttgcc  | ttggcaatag  | atagtattat  | ttatacaaat  | tatgtaatct  |
| 5161 | gaggatggta  | gagcagagtt  | aagatcatga  | gaagtcataa  | gaatcgatac  | caatcgtttt  |
| 5221 | tttgctat    | tatttataat  | atcataaaat  | ttagcccgcg  | cgtaaatatc  | cattgcacta  |
| 5281 | actgggtcat  | ctagaatgat  | caagtcaggc  | tctgcaatta  | aacaacgtgc  | aagtagcaat  |
| 5341 | aattgtgttt  | gccctgcaga  | aatttctaac  | acttgattct  | tcaaaatgtt  | accgatacta  |
| 5401 | accaactcta  | tcgtttctgt  | aataatggat  | tgatttttct  | ttagtctttt  | caaggagcta  |
| 5461 | tttaaaagga  | aatattcaac  | tgttattggc  | atcaaattac  | taataactaa  | attttgcggc  |
| 5521 | atatagccaa  | tttttatgtt  | gtcagcaaat  | acgatattac  | cggtacagct  | tttatttatg  |
| 5581 | ccagcaattg  | ctttcactaa  | agaggtttta  | cctccaccat  | ttggaccaag  | tattgtaatt  |
| 5641 | atgtctcctc  | tttccatgaa  | catattgata  | ttgtcaagga  | ttctttttacc | atcatatgtg  |
| 5701 | agagcaagat  | tttctat     | tagaacacga  | ttattgacat  | tattcaattt  | attgacaaaa  |
| 5761 | tttaacttct  | tctcaacg    | tatatgagac  | atttactgac  | tttttttcta  | ttactttcat  |
| 5821 | ttacactata  | ctataatatc  | gccttttcat  | ccaatttaaa  | agttgtagct  | acaatcaaac  |
| 5881 | ctatccactc  | acttgtagct  | tctattacag  | aagggatttt  | agaaccggaa  | ttgcttggct  |
| 5941 | atgcaacatc  | tgcgcataat  | tatatattaa  | agccatctga  | tgcgagtaat  | ttagaatcaa  |
| 6001 | gtgacgttat  | attttatgtt  | gacgataact  | tagagacg    | tggtcaaact  | ttcgccaaaa  |
| 6061 | ataataaaga  | actagtgcaa  | ttgtcaaagg  | caatcaacct  | acttcctact  | cggccacatt  |
| 6121 | catttttctag | aaaaattact  | cacattaaag  | atgaaaaaga  | tttacacatt  | tggctgagtc  |
| 6181 | ccgaaaatgc  | aaagagcatg  | atactttctg  | taagtgcac   | attgtctaac  | atagataaa   |
| 6241 | aaaattccca  | tcgatacaac  | tctaattgca  | caaaagctat  | aaaaaaaaata | gaccaagaag  |
| 6301 | taaaagaaat  | tatgaaagaa  | ctgaatgatt  | ttaaaaatca  | aaaatatatc  | gtcactcacg  |
| 6361 | atgcttatca  | atattttgaa  | aatatttttg  | gtttaaatca  | cccaagtgcc  | attctttcca  |
| 6421 | tagaagagga  | ttcttacata  | ggtatgagga  | gtttaatgaa  | gctaaaaaag  | ataatgaagg  |
| 6481 | aagaaaacgt  | taaatgtata  | tttgctcatt  | cacaggaaga  | cagcataaa   | cctaattgctc |
| 6541 | tttctaata   | cgcaaaaatg  | gtagttcttg  | atcctatttg  | atcagacata  | gagcctggaa  |
| 6601 | aagatgcata  | tctagctata  | atcaataaca  | ttgcacaaaa  | ttttaagtct  | tgttttgttg  |
| 6661 | agtaataagt  | tcccttttag  | cttactgttt  | tattgttctg  | catttat     | tcctttacat  |
| 6721 | attatgcagg  | tttagaatta  | tgctttat    | ttacgtttat  | gtcttggccc  | aatacaatca  |
| 6781 | ataagttaag  | caagtattct  | aaggagaacc  | cctcgatttt  | tgacctattg  | atttgagata  |
| 6841 | ctttaggttg  | atctatcttt  | agagcgtttg  | ctgctttttt  | ctgtgttg    | tacttcttac  |
| 6901 | ttattaattg  | tgcaatgacc  | tttattaatt  | tcagttttgt  | atctttcaca  | tcccccaact  |
| 6961 | ctactattat  | aggataactt  | aattgtaaat  | tttgcataat  | aataaaatcc  | cttataaaaa  |
| 7021 | aattacttta  | gtttttcttc  | tttaataaac  | acatgccttc  | tgactactgg  | gtcactactc  |
| 7081 | ctaaactcca  | gttttttggt  | aagctttttt  | ggattacgct  | tttttacata  | aaaataacct  |
| 7141 | gttgattttt  | cttcaccagt  | ttttgttg    | ttgattgcag  | tgctaactaa  | cttaacgagc  |
| 7201 | aaagaagcat  | tttttttcgc  | catacttata  | atgatataat  | aaattctatg  | cgagtttatt  |
| 7261 | acgcaaaaca  | ctaaaagtca  | accgaataat  | gcagatcgta  | aaattcttga  | caatcaacag  |
| 7321 | tgcatthaagt | agcatgaagt  | taacttcaga  | atgaaaagca  | aacggtaaat  | aagtggtaaa  |
| 7381 | tagtggttaa  | aggttattat  | tgatagaaaa  | ttccacctgt  | tctaattgagg | taagagttgc  |
| 7441 | cttgtcagtt  | aataataagg  | ttgtagaatt  | tgaacaagaa  | ttcaaggaaa  | aaaaacaatt  |

|       |             |             |             |             |             |             |
|-------|-------------|-------------|-------------|-------------|-------------|-------------|
| 7501  | aagaggtaaat | atatacgttg  | cttatataaaa | gcgtatagag  | ccttcttttgc | aagccgtatt  |
| 7561  | tatcgaatat  | ggaaaaaata  | agcaaggttt  | tttgtctttt  | tccgagatat  | ctctagatta  |
| 7621  | cttcaatatt  | ccagaaaaag  | aaaaggaaac  | tatcttttgag | agctactcaa  | atgacgatta  |
| 7681  | tacagaaaaa  | gggaacgata  | ccatagcaaa  | tgtctcttca  | gattctgcag  | ctagtaagaa  |
| 7741  | tgtcaacgag  | tcaggtagtg  | gttttgtaag  | agaggtagct  | ttatataaaa  | aatacaaatt  |
| 7801  | acaagatgtt  | atttcagtaa  | atcaaaaagt  | attgggttcag | ctaactaaag  | aggaacgagg  |
| 7861  | caataaagga  | gcttcattta  | caacatacat  | aacttttagtg | ggtagatact  | gtgttttcat  |
| 7921  | gccaaattcc  | atgagtaaag  | gtggagtgtc  | tcgcagaatt  | gaagatgcta  | atgtcagaaa  |
| 7981  | gcagttaaag  | gagatactga  | gttcaataaa  | cttgccaaaa  | aggtcagggt  | taatagtaag  |
| 8041  | aactgttggt  | tcaggaaaaa  | ataagaaaga  | aattgagcag  | gattacaatt  | acttatcctc  |
| 8101  | attatggcag  | agcattcaaa  | aaaatgcctt  | ctctgtaaac  | gttccatcat  | taattttacaa |
| 8161  | tgaagcagat  | gtaattatga  | gatctgttcg  | tgatttttgt  | agcgatggta  | tagaagttat  |
| 8221  | agtgtctgga  | aaggaagctt  | ttgaggcagt  | taggcaatat  | gctaacaatg  | cactaaaagg  |
| 8281  | tagtaagttg  | cgctatagat  | tgtatagagg  | ttatgctccg  | atctttactt  | actacggaat  |
| 8341  | cgaagatcaa  | atttctgagt  | tatatagcaa  | tagagtagaa  | ttgccatctg  | gtgggtcttt  |
| 8401  | gataataact  | ttaactgagg  | cgtttgtttc  | aatagacgta  | aattcaggaa  | agatgacagg  |
| 8461  | agaagatagc  | atagaagaaa  | cagcttatag  | aaccaacatg  | gaagcagtac  | ctgaaatatc  |
| 8521  | aagacagggtg | aatcttaggg  | gcctatcagg  | attaatagta  | gtcgatttta  | ttgatatgtt  |
| 8581  | gaaatatcag  | tattgcagag  | ctggtgagtc  | tgctataaag  | caagcgttta  | aagatgataa  |
| 8641  | agctaaagtt  | caatttagct  | acataaatga  | ctttggttta  | atgggtatttt | caagacaaag  |
| 8701  | aattaaacca  | aacatacaag  | aaattaatac  | tacagagtgt  | ttacactgca  | aaggtagctg  |
| 8761  | aagagtaaaa  | tcaaacgaag  | taattgtttc  | atcaatacta  | agggattttac | aacatatgtc  |
| 8821  | taacaagaat  | cgaaataagt  | cttttgattt  | agtagcacac  | agtgcagtta  | tagcgcacat  |
| 8881  | ttttaataac  | aaacgcaata  | cagtttctac  | aatcgaaaaa  | gagtttaata  | ttacattgaa  |
| 8941  | cgttagtatt  | gataacagtt  | tagatgtaaa  | tacatttggt  | ttaaaacaag  | gagatgatgt  |
| 9001  | taattttaaac | ggttataaag  | cattacagaa  | ctctggatac  | caaattgggg  | atagcagcaa  |
| 9061  | tgaagaagct  | gataattcaa  | ataaactacg  | aggcaatttt  | tggctgacta  | agtggctttc  |
| 9121  | gcgcctttta  | agttctaata  | actaattaga  | aacctaaatt  | gggcttgtaa  | ttaatgagcc  |
| 9181  | ctatacttat  | atattcttat  | atcagataat  | atttacaatg  | gggtactcat  | tatgggaaga  |
| 9241  | gcaataggca  | tagatctcgg  | aacaacaaat  | tcttggtgtg  | caataatgca  | gggcaaggat  |
| 9301  | acaaaggtaa  | tagaaaataa  | agaaggggca  | agaactactc  | catctatagt  | tgcattgact  |
| 9361  | tcttcaggag  | aaagggtgat  | tggtgctcca  | gcaaaaaggc  | aagcaaccac  | caatgcaagt  |
| 9421  | aatacctttt  | ttgctactaa  | gagattaata  | ggccgtcaat  | atagtgatcc  | tgagatgaaa  |
| 9481  | aatctaagtg  | taccatacaa  | agtatttgca  | gcaaaaagtg  | gtgatgcatg  | ggttaaaaca  |
| 9541  | actgataata  | aagaatatct  | tcctagtcaa  | attggtgcat  | ttatactaca  | aaacatgaaa  |
| 9601  | gaggcagcag  | aagcttatct  | tggagaggaa  | gtaaaaagatg | ctgtgataac  | agtgccagca  |
| 9661  | tacttcaacg  | actctcaacg  | tcaagcaaca  | aaagatgcag  | gaaaaattgc  | cggattaaat  |
| 9721  | gtactcagaa  | tagtaaatga  | accgactgct  | gcagcacttg  | cttatgggtct | tgataagaaa  |
| 9781  | catgggcaca  | caatagtagt  | atatgacctt  | ggtggtggta  | catttgacgt  | ttcaatactt  |
| 9841  | gaaatagggtg | atggagtttt  | cgaagtgaag  | gcaacaaacg  | gtgataccca  | tcttgagggt  |
| 9901  | gaagactttg  | ataatggagt  | agtgagttat  | ttactagatg  | aattcaagaa  | aagtaatggc  |
| 9961  | attgatttga  | aaaatgatcc  | aatggctatg  | caaagaatca  | aagaagctgc  | tgaaaaagcg  |
| 10021 | aaaattgaat  | tatcaagtgc  | aatggaaacg  | gaaataaaatc | taccgtttat  | tacagctgat  |
| 10081 | gcaagtggtc  | caaaacactt  | aaatatgaaa  | ttaacgagag  | caaaacttga  | aagcttagtg  |
| 10141 | aatgattttaa | tcgaaagaac  | tatggctcct  | tgtaaaaaag  | ctcttgagga  | tgctggttta  |
| 10201 | tctgctagtc  | aaattggcga  | agtggttctt  | gttggtggca  | tgactcgat   | gccaaaagtc  |
| 10261 | atagagaaag  | ttaaagaatt  | ctttggcaaa  | gatccacata  | gaggagttaa  | ccctgatgaa  |
| 10321 | gttgtagcaa  | ttggagctgc  | aatacaggcg  | gggatcattc  | aaggtgatgt  | aagagatgtg  |
| 10381 | ttactacttg  | atgtgacccc  | actttctctt  | ggtattgaaa  | ctctaggagg  | agtattcact  |
| 10441 | ccacttattg  | agcgtataac  | tacaattcct  | actaaaaaat  | ctcagggtgt  | ttcaactgca  |
| 10501 | gaagataacc  | aaacagctgt  | tacaattaag  | gtgcatcagg  | gtgaaagaaa  | actggcagtt  |
| 10561 | gataataagc  | tactcgggtca | gtttagtttg  | gaaggggatac | ctcctgctcc  | gcgcggaagg  |
| 10621 | ccacaaattg  | aagtgcacatt | tgatatagat  | gcaaatggaa  | tagcacacgt  | ttctgcaaaa  |
| 10681 | gataaagcta  | ctggaaaaaga | gcaaaaaata  | cgcatccaat  | cttcaggcgg  | tttatctgat  |
| 10741 | gatgaaataa  | atcgcatggt  | aaaagaagct  | gaagaaaaag  | cgcaagaaga  | tgaaaagcgc  |
| 10801 | aaaaagttta  | ttgaagtga   | gaatcaagcg  | gatagcttag  | tccattctac  | agaaaagtct  |
| 10861 | ctgacagagt  | atggtgataa  | agtttcacca  | gaagatagat  | ctgctattga  | aaatgcagtt  |
| 10921 | aacgaattaa  | aagaagttag  | taaatctgat  | aacattgatg  | acgctgattc  | aatacagcag  |
| 10981 | aaagtcacta  | atctttctca  | attatctatg  | aaacttggag  | aagctatgta  | tcaagcatct  |
| 11041 | caacaaaata  | gtgctgaaaa  | tggctttttca | tcagaaggaa  | atccaaatga  | taaagaggaa  |

```

11101 aaagtagtag attctgatta tcaagacata gataataaag aagagaataa gtaattgcga
11161 ttgtcatcca agtagctgat actgggatga caagaggagc atattgttgc ttaaagaaac
11221 cattatggat attattaaaa cgatagaaga aaagatacac gattcgatag atgtaattga
11281 tatcaacatt atcgatgaat cagcaaagca tgctgatcat tattttgctt catcttcaac
11341 actaccttca catatcaagc taatattgat atctgacagc tttatcggaa tgaacactct
11401 caaaaggcat aaattgatct atgaattatt aaagagttag atagagctaa tacatgcaat
11461 ttctcttcac ttgtatacgc aaaacgagta caatttataa aataaataat aaaaatgtga
11521 aggaagagtc tttattagtt aaagcaggaa gaaaatttaa ggactataaa ggttctatga
11581 acccgccagt ttatcattct tctaccatat tattccctac ttacaaggac tacttaaagt
11641 cagcaaatgg agaaagtata tacgatgtaa tcaacgatga tgttgcaaga gattacagct
11701 atagtaatgt tgggtactccc actgttcatt atttttcaaa tgcactgggt gaaattgaag
11761 ggagtggaca agcgcttatt tttccttccg gactatttgc acttactttt gctattttga
11821 ctttacttaa agcaggttct catgttttaa ttcaggataa cagttattac cgactcaaga
11881 gatttgccga aaatgagtta ccaaacaggg gaatagaagt aactttttat gatccaacac
11941 aggatataac tgatttaatt cagagtaata cttcattgat aatgatcgag actcctgggt
12001 ctgtaacgtt tgagatttcg aatatagagc atatagtaaa agttgctaaa gaacgtggaa
12061 tcgtaaccgt ttgcgacaat tcatgggcca ctctttgtt atttaagccg cttgattatg
12121 gaattgatgt tgcactatat gcggtaacaa agtatctagc cggtcactca gatttattga
12181 tggggactat gattgctgaa ggtgaaatth ttaaattgct ttatgagagc tataaaaatt
12241 atggagtaac cattcaatcg cacgactgtt atcttgaca taggggacta agaacactgc
12301 acacacgtat gaaaaagtac caaatacag caatggaagt ggcaaagtgg ctagaagcac
12361 agcaaaaagt tagaaagggt ttatatccag cacttccctc ccacctcaa cacgaattat
12421 ggaaaagtta ctttaaagga gcaagcggcg tattcagtat agtattgggt agagaatatt
12481 catgtgaaga actaagctgc atgggtgatc acatgaaaat ttttggtatc ggtgcttctt
12541 ggggaggggt cgacagtttg atattaccaa tagatcgtag atctatgtca agatctgtaa
12601 tgaattcaga ttatggtgga agttttatac ggatattttg tggactggaa gatcctgaag
12661 atttaatctt tgaccttaat gacgactaa aaagggtacc atgttttagac tttcaaacg
12721 atgaagtagg acatgaaact gagagaatta ctgcataaca ttattgatgt taactttgat
12781 attgaaatca aaggcgtcac atgtaatccc aagaaaatca aggaaggtta tctttttgtt
12841 tgtgtgtcag aaagggatag gatttacata gatcagatat tatcttgttg agctaaagcg
12901 ataattgcaa gtgattgcat aacagaagct tcaagccttg gtatcattcc aacgcgtgat
12961 gctggaatct gtatcttcca ccaaaccct caagaaatat acagcgaaat agtcagcagg
13021 ttttatcaat tcaaacagcc aaaatatggt gctgctgtaa caggcacaaa tggcaagact
13081 tcagtagtag aattttgccc ccagatctgg caaaactctg gctataatgc tgcgtctatt
13141 ggaacacttg gaacatgcat caataatggc agaaaaggta atagcaacag ccttaccact
13201 ccagggtcag aagaccttta cgcaacattg cgtggtataa gtgtagaaca cttagtgttg
13261 gaatcatcaa gtcattgggt tgatcaatac agaatccatg gattaaagtt gagtgctgca
13321 gcttttacta atttctcgca agatcattta gattaccata aaagtcttgg tggatattta
13381 gaaactaaaa aaagggttatt ttacgaagta ttaccagaag gaaaaacagc gattttaaat
13441 gcggatatag atgaatacgg cgcattgctt aaaatagctg aaaaacgcag taataaagtt
13501 gtgacttatg gaaaaaaagg ctctgatatt actttattag agcaaatacc aactccaagt
13561 ggtcaatacc ttacagtaaa agttgataac caaatttaca atacattttt cccagtttta
13621 ggaaaatttc aagcatataa tctgctatgt gcaattggta tatctggatt aaattacaga
13681 gaaatatgtg tggataaaact ctttttcccg tcaggaagaa tggagaaagt gaaacctttt
13741 gcattcgttg attacgctca tactccaagt gcgcttaaac aagccctatt gtctttaaaa
13801 tggcacttca ataaaaaaat agttctagtt tttggatgcg gtggcaatcg tgatcaaaca
13861 aaacgcgcag aaatgggtaa agtagcacia atatatgcag acaaagtgat aatcacggat
13921 gacaatccgc gtgatgagaa tcctgcagaa attcgctcgtg gtattttact acattgccct
13981 gatgcgctag agatagaaga tagaagagaa gctatagaga aaggagtaga tattgcctat
14041 aatgagggta tgattctgct agttgcagga aaggggcatg aaggatacca aatcgtgagc
14101 ggccaaactt ttgaattcag tgatgttgag gttattaaaa atca

```

//

```

LOCUS      JAQZAU010000039      18036 bp      dna      linear      ENV 17-MAR-2023
DEFINITION MAG: Wolbachia pipientis isolate wEsol contig_3090, whole genome
            shotgun sequence.
ACCESSION  JAQZAU010000039 JAQZAU010000000
VERSION    JAQZAU010000039.1
DBLINK     BioProject: PRJNA929258
            BioSample: SAMN33142973
KEYWORDS   WGS; ENV; Metagenome Assembled Genome; MAG.

```

SOURCE Wolbachia pipientis (insect metagenome)

ORGANISM Wolbachia pipientis  
Bacteria; Pseudomonadota; Alphaproteobacteria; Rickettsiales;  
Anaplasmataceae; Wolbachieae; Wolbachia.

REFERENCE 1 (bases 1 to 18036)

AUTHORS Fiutek,N., Couger,B.M., Roy,S., de la Torre,J.R. and Connor,E.F.

TITLE Genomic assessment of the contribution of the Wolbachia  
endosymbiont of Eurosta solidaginis to gall-induction

JOURNAL International Journal Molecular Sciences

REFERENCE 2 (bases 1 to 18036)

AUTHORS Fiutek,N., Couger,B.M., Roy,S., de la Torre,J.R. and Connor,E.F.

TITLE Direct Submission

JOURNAL Submitted (10-FEB-2023) Biology, San Francisco State University,  
1600 Holloway Ave, San Francisco, CA 94132, USA

COMMENT ##Genome-Assembly-Data-START##  
Assembly Date :: JUN-2019  
Assembly Method :: FLYE v. 06-2019  
Genome Representation :: Full  
Expected Final Version :: Yes  
Genome Coverage :: 100.0x  
Sequencing Technology :: Illumina HiSeq; PacBio Sequel  
##Genome-Assembly-Data-END##

FEATURES

source 1..18036  
/organism="Wolbachia pipientis"  
/mol\_type="genomic DNA"  
/submitter\_seqid="contig\_3090"  
/isolate="wEsol"  
/isolation\_source="galls on Solidago altissima"  
/host="Eurosta solidaginis MN-2018-EFC"  
/db\_xref="taxon:955"  
/environmental\_sample  
/country="USA: Cowling Arboretum, Carleton College,  
Northfield, MN"  
/lat\_lon="44.48 N 93.13 W"  
/altitude="280 m"  
/collection\_date="2018-11"  
/metagenome\_source="insect metagenome"  
/note="metagenomic"

gene complement(<1..140)  
/locus\_tag="wEsol\_00298"

CDS complement(<1..140)  
/locus\_tag="wEsol\_00298"  
/codon\_start=1  
/transl\_table=11  
/product="hypothetical protein"  
/translation="MSVATRFFQLLCNKAIPVSSTGMTSLLLQYSHISGGKPIAKISM  
LR"

gene 182..511  
/locus\_tag="wEsol\_00299"

CDS 182..511  
/locus\_tag="wEsol\_00299"  
/codon\_start=1  
/transl\_table=11  
/pfam="DDE\_Tnp\_1\_5"  
/fullproduct="qcoverage 100 , hcoverage 100 , similarity  
100 , identity 100 , eval 1.19e-72 , alnlength 109 ,  
Bacteria , Proteobacteria , WP\_007548762.1 MULTISPECIES:  
transposase [Wolbachia]"  
/translation="MPQKMRVSNHSEYNKFLEKRGNIHFYINEAIEKWYENGPKIPGG"

```

NNIYSDKVVILVHIITCLFRIGLRQTVGFIAGYLEQIGKNLQVISYSQSSRRFKKLNI
KINDCRK"
/product="transposase"
/besthit="qcoverage 100 , hcoverage 100 , similarity 100
, identity 100 , evalue 1.19e-72 , alnlength 109 ,
Bacteria , Proteobacteria , WP_007548762.1 MULTISPECIES:
transposase [Wolbachia]"
gene 495..695
/locus_tag="wEsol_00300"
CDS 495..695
/locus_tag="wEsol_00300"
/codon_start=1
/transl_table=11
/fullproduct="qcoverage 100 , hcoverage 100 , similarity
100 , identity 100 , evalue 3.80e-36 , alnlength 66 ,
Bacteria , Proteobacteria , WP_010082383.1 MULTISPECIES:
hypothetical protein [Wolbachia]"
/translation="MIAENNMEDIEIAIDSTGISIYNNTPGHSKENSEDRKYRSYEQT
RKLHVMLNTNSKKAIKVKYSNG"
/product="hypothetical protein"
/besthit="qcoverage 100 , hcoverage 100 , similarity 100
, identity 100 , evalue 3.80e-36 , alnlength 66 ,
Bacteria , Proteobacteria , WP_010082383.1 MULTISPECIES:
hypothetical protein [Wolbachia]"
gene 715..993
/locus_tag="wEsol_00301"
CDS 715..993
/locus_tag="wEsol_00301"
/codon_start=1
/transl_table=11
/pfam="DDE_Tnp_1 DDE_Tnp_1_2"
/fullproduct="qcoverage 96.7391304347826 , hcoverage
92.7083333333333 , similarity 98.9 , identity 98.9 ,
evalue 5.81e-57 , alnlength 89 , Bacteria ,
Proteobacteria , WP_210437473.1 transposase, partial
[Wolbachia endosymbiont of Drosophila auraria]"
/translation="MLKEVDFQYVIKVLVYADRAYDREKLYKLCNQYGIKTKIPPKNNA
AEHPKLDYMAERNSAVKLIKSYDEDGIKKWKKEMSYGKRSYIEVFSRD"
/product="transposase, partial"
/besthit="qcoverage 96.7391304347826 , hcoverage
92.7083333333333 , similarity 98.9 , identity 98.9 ,
evalue 5.81e-57 , alnlength 89 , Bacteria ,
Proteobacteria , WP_210437473.1 transposase, partial
[Wolbachia endosymbiont of Drosophila auraria]"
gene 1209..1469
/locus_tag="wEsol_00302"
CDS 1209..1469
/locus_tag="wEsol_00302"
/codon_start=1
/transl_table=11
/fullproduct="qcoverage 100 , hcoverage 100 , similarity
100 , identity 100 , evalue 3.75e-54 , alnlength 86 ,
Bacteria , Proteobacteria , WP_012673289.1 MULTISPECIES:
hypothetical protein [Wolbachia]"
/translation="MTEDDGVTGSNTKSFVPIPIESALKSMFKVEISLEDAGKIRKGQE
VVLNNLRNLKNDICCTVVGSVPIAICSFIYGCVKPIRVFNI"
/product="hypothetical protein"
/besthit="qcoverage 100 , hcoverage 100 , similarity 100
, identity 100 , evalue 3.75e-54 , alnlength 86 ,
Bacteria , Proteobacteria , WP_012673289.1 MULTISPECIES:

```

```

gene      hypothetical protein [Wolbachia]"
          1482..1754
          /locus_tag="wEsol_00303"
CDS       1482..1754
          /locus_tag="wEsol_00303"
          /codon_start=1
          /transl_table=11
          /fullproduct="qcoverage 100 , hcoverage 100 , similarity
          100 , identity 100 , evalue 1.05e-55 , alnlength 90 ,
          Bacteria , Proteobacteria , WP_006279944.1 MULTISPECIES:
          30S ribosomal protein S15 [Wolbachia]"
          /cog="RpsO COG0184 89 Ribosomal protein S15P/S13E"
          /pfam="Ribosomal_S15"
          /tigr="TIGR00952 S15_bact 86 ribosomal protein S15"
          /product="30S ribosomal
          protein S15"
          /translation="MSITSEKKKSLINIYAIKEDDTGSSSFVQCAILTERISNLTEHFK
          VHKHDHHSKRGLLILIGRRRKHLNLIKRFKGNEAYQELIEKLGIRK"
          /besthit="qcoverage 100 , hcoverage 100 , similarity 100
          , identity 100 , evalue 1.05e-55 , alnlength 90 ,
          Bacteria , Proteobacteria , WP_006279944.1 MULTISPECIES:
          30S ribosomal protein S15 [Wolbachia]"
gene      1769..4042
          /locus_tag="wEsol_00304"
CDS       1769..4042
          /locus_tag="wEsol_00304"
          /codon_start=1
          /transl_table=11
          /fullproduct="qcoverage 100 , hcoverage 100 , similarity
          100 , identity 100 , evalue 0.0 , alnlength 757 ,
          Bacteria , Proteobacteria , WP_155969351.1 MULTISPECIES:
          polyribonucleotide nucleotidyltransferase [Wolbachia]"
          /cog="Pnp COG1185 692 Polyribonucleotide
          nucleotidyltransferase (polynucleotide phosphorylase)"
          /pfam="RNase_PH RNase_PH_C Pfam-B_11765 PNPase RNase_PH
          Cauli_DNA-bind RNase_PH_C KH_2 KH_1 KH_3 S1"
          /tigr="TIGR03591 polynuc_phos 689 polyribonucleotide
          nucleotidyltransferase"
          /product="polyribonucleotide
          nucleotidyltransferase"
          /translation="MFKIIKKSIEWGGRALSLETGKIARQAHGSVVVNYGDTSVLVTV
          VRKKKEESVDFLPLNVQFIKSYAMGKIPGGFFKREGKPSDRETISRVIDRSIRPLF
          PEGFHDEISVVCNLLTYDTVNPPEVPALIGAVAALAI SGVPFHFTIAGVMVGC DENNN
          YILNPSVQEMKASSLDLFLSGDENSILMVESEVKELSEENVFNAIKFGHEHLKPVIKL
          IKEFADTIGNKPESFAPIDASDITQELEKYGKDFEKAYSQTVKQERVQALEAIRENIL
          NTLKETGKDEKLITYAVKNFERSLVREIIRKKSVRIDSRKHDEIRQIEVEVDILSKTH
          GSALFTRGNTQALVV TALGTTQDEQIVDDIEGDRREHFMLHYNFPSFAVGETSAA RAP
          GRREIGHGKLAWKAIHPVLPDKSEFPYTIRVVSEILESDGSSSMATVCGTSLALMDTG
          VPIKAPVAGIAMGLIKDKDEYVILSDILGDEDYLGDMDFKVAGTSEGV TALQMDMKIS
          GISFEIVEKSLEQAKAGRLHILEKMNAVISEHSDDVKDHAPRMLSFYIDKDKISAAIG
          SKGKNIRSVCERSNAKIEIGDDGKVS VFATSGTEAEIAKSM MIDSITELEQGSIVDVK
          VVRIEKSIVELEFLNGRKGKMHISEVANEHIDSIESVLKQDDTFKALVIDFEKGGCPK
          LSRRRVDQETGEFFEGELYNEERKDGPNDRDNYYNNSFSRKPGGSHHKRPPRPSGFS
          NNRNRPKFGNNDSSSGFY"
          /besthit="qcoverage 100 , hcoverage 100 , similarity 100
          , identity 100 , evalue 0.0 , alnlength 757 , Bacteria ,
          Proteobacteria , WP_155969351.1 MULTISPECIES:
          polyribonucleotide nucleotidyltransferase [Wolbachia]"
gene      4249..4635
          /locus_tag="wEsol_00305"

```

CDS 4249..4635  
 /locus\_tag="wEsol\_00305"  
 /codon\_start=1  
 /transl\_table=11  
 /pfam="Pfam-B\_3816 DUF972 Pfam-B\_4504 Pfam-B\_3314 DivIC  
 HALZ Pfam-B\_1653 Pfam-B\_3883 bZIP\_1"  
 /fullproduct="qcoverage 100 , hcoverage 100 , similarity  
 99.2 , identity 99.2 , evalue 1.74e-65 , alnlength 128 ,  
 Bacteria , Proteobacteria , AAS14583.1 transposase,  
 degenerate [Wolbachia endosymbiont of Drosophila  
 melanogaster]"  
 /translation="MVNLLLELCKNLQQKIEKLEAEIENLKAENKALKIENAEELKERLG  
 LNSKNSSLPSSKELYKIKKDKPKSERNVGDQVGHKGNFATMEADKVVKIELPNICEC  
 GGELVICEKPYVHQVDLPEIRPYVV"  
 /product="transposase, degenerate"  
 /besthit="qcoverage 100 , hcoverage 100 , similarity 99.2  
 , identity 99.2 , evalue 1.74e-65 , alnlength 128 ,  
 Bacteria , Proteobacteria , AAS14583.1 transposase,  
 degenerate [Wolbachia endosymbiont of Drosophila  
 melanogaster]"

gene complement(4661..5143)  
 /locus\_tag="wEsol\_00306"

CDS complement(4661..5143)  
 /locus\_tag="wEsol\_00306"  
 /codon\_start=1  
 /transl\_table=11  
 /product="hypothetical protein"  
 /pfam="DDE\_3 rve"  
 /translation="MKIIATKEPKNLVYIDESGIDNTEDYPYGYCQKGQRFYALKSGK  
 KTQRISMVAALSGRKIVVPLTFEGHCNMDVFNGWVEQFLTPILEPGQTVILDNATFHK  
 SDKIIELAKGVGAIEILYLPYPSPDFNKIEHHWFAIKNRARKNIPLFESFRRAVDS AFL  
 "  
 /besthit="qcoverage 100 , hcoverage 58.1818181818182 ,  
 similarity 100 , identity 99.4 , evalue 1.00e-112 ,  
 alnlength 160 , Bacteria , Proteobacteria ,  
 WP\_213863609.1 IS630 family transposase, partial  
 [Wolbachia endosymbiont of Ceratitis capitata]"

gene complement(5140..5556)  
 /locus\_tag="wEsol\_00307"

CDS complement(5140..5556)  
 /locus\_tag="wEsol\_00307"  
 /codon\_start=1  
 /transl\_table=11  
 /fullproduct="qcoverage 86.9565217391304 , hcoverage  
 95.2380952380952 , similarity 100 , identity 100 , evalue  
 4.82e-81 , alnlength 120 , Bacteria , Proteobacteria ,  
 AOV87628.1 transposase [Wolbachia endosymbiont of  
 Drosophila incompta]"  
 /cog="COG3415 COG3415 138 Transposase and inactivated  
 derivatives"  
 /pfam="HTH\_Tnp\_IS630 HTH\_23 HTH\_28 HTH\_29 CENP-B\_N HTH\_7  
 HTH\_23"  
 /product="transposase"  
 /translation="MAFFPLLSICLLCSENWYYDLRKKAMEALDEGESRETVAARFKI  
 GRTTLWEWQQRRKETGDFQSKKLGNGGYNHKITDWDTFAKFAREHGGKTLSEMAKLWN  
 NVSIQTIYRALKKIGFTRKKRHMDTRKETKKNVLNF"  
 /besthit="qcoverage 86.9565217391304 , hcoverage  
 95.2380952380952 , similarity 100 , identity 100 , evalue  
 4.82e-81 , alnlength 120 , Bacteria , Proteobacteria ,  
 AOV87628.1 transposase [Wolbachia endosymbiont of

gene Drosophila incompta]"

5586..6107

/locus\_tag="wEsol\_00308"

CDS 5586..6107

/locus\_tag="wEsol\_00308"

/codon\_start=1

/transl\_table=11

/product="hypothetical protein"

/pfam="HTH\_23 HTH\_28 HTH\_1 HTH\_29 HTH\_Tnp\_IS630 HTH\_32 Pfam-B\_19535 HTH\_Tnp\_Tc3\_2 HTH\_24 HTH\_33"

/translation="MALRSKLLDEKVVESAKAMLKKVRNNAYVTKKLNAVIAAKKHSI TAVAKICCSIRTALTAWIKHLKFNREEKLFAPPQRRRKTRLNQSQREQVEAWIQENPN ITIKEMRIKIQERFGLDISKSTVHRNMQRMKFSYITPRPVHNGQDKSKQEEFKKKSQR NYWQISRKRAIFL"

/cog="COG3415 COG3415 138 Transposase and inactivated derivatives"

/besthit="qcoverage 90.1734104046243 , hcoverage 47.1299093655589 , similarity 100 , identity 100 , eval 8.70e-97 , alnlength 156 , Bacteria , Proteobacteria , WP\_155968376.1 MULTISPECIES: IS630 family transposase [Wolbachia]"

gene complement(6210..6542)

/locus\_tag="wEsol\_00309"

CDS complement(6210..6542)

/locus\_tag="wEsol\_00309"

/codon\_start=1

/transl\_table=11

/product="hypothetical protein"

/translation="MEWVREVTNLHKVRSSRVIVSYILLHKMFCEFIYNQNLSTGLSSG EYGGRYIISIFLGTFFKFFDLCLQAQSITRKVSRIPRYCDICSRNIFMQSVLTFFLELS PFLGLTAL"

/besthit="qcoverage 51.8181818181818 , hcoverage 96.6101694915254 , similarity 86.0 , identity 82.5 , eval 5.00e-24 , alnlength 57 , Bacteria , Proteobacteria , ONI56732.1 hypothetical protein N500\_0170 [Wolbachia pipientis wUni]"

gene complement(6545..8089)

/locus\_tag="wEsol\_00310"

CDS complement(6545..8089)

/locus\_tag="wEsol\_00310"

/codon\_start=1

/transl\_table=11

/product="hypothetical protein"

/translation="MPNIMNQELVRAFNIILCHNEVAITNLIVQSTDQTFLLKKEDRIV ISFDKNMDVGQCMKYLNHNIKSIVETFCGSESGANMSFNTQFFPFNLNERQLTKDKEG YKFSVPIDKGVVFNLCCLLAHGLAKDAKEDMGNEFGERCMEGRVYDVRFDKSYLYCM RFYDKKLQDYFVESFSSRIKKNYKNGPKSTNDFLKIKNVCVYIKGSIFNKAKFIKDIVK HKASLECRDFEVTSAEDETVESLKFVIDLSRTVGIPINSVLHVSYTGSGENSVLIPA AKEIIDNIIYYKILSKEQADDINKVFGMTVLNNVEDCISPKHLPVFGRGRIYIGIDFAN QDISYCVLNKIMESSVINKDHELAIIDPELPTLLAEASQTRGCPKRSRGKGLERPPRQ GSEREGGKGLFQLVPGKIDSSQSTGDQSQLSSGEIDLSQSTGDQSQLSLGAGEGTLT EANIQDQKRSSSIPSLRAWDSSTFLNSEDLSKDTENICNEEPEKQQVIPILIIRRTNR RHCRRV"

/besthit="qcoverage 98.2490272373541 , hcoverage 70.6293706293706 , similarity 78.4 , identity 68.5 , eval 1.22e-223 , alnlength 505 , Bacteria , Proteobacteria , WP\_065106813.1 hypothetical protein [Wolbachia endosymbiont of Nomada ferruginata]"

gene complement(8127..8321)

/locus\_tag="wEsol\_00311"

CDS complement(8127..8321)  
 /locus\_tag="wEsol\_00311"  
 /codon\_start=1  
 /transl\_table=11  
 /fullproduct="qcoverage 96.875 , hcoverage 93.9393939393939 , similarity 83.9 , identity 77.4 ,  
 evalue 1.10e-21 , alnlength 62 , Bacteria , Proteobacteria , WP\_191111146.1 hypothetical protein  
 [Candidatus Wolbachia massiliensis]"  
 /translation="MDSNKGSGYEKRYGDNTAPGGGRIRADAIDPRRVDDFTERIKR  
 EEERRKQNQSSQGSGRSGK"  
 /product="hypothetical protein"  
 /besthit="qcoverage 96.875 , hcoverage 93.9393939393939 , similarity 83.9 , identity 77.4 , evalue 1.10e-21 ,  
 alnlength 62 , Bacteria , Proteobacteria , WP\_191111146.1  
 hypothetical protein [Candidatus Wolbachia massiliensis]"

gene complement(8742..9839)  
 /locus\_tag="wEsol\_00312"

CDS complement(8742..9839)  
 /locus\_tag="wEsol\_00312"  
 /codon\_start=1  
 /transl\_table=11  
 /pfam="SHOCT"  
 /fullproduct="qcoverage 100.27397260274 , hcoverage 85.1162790697674 , similarity 83.1 , identity 80.1 ,  
 evalue 3.78e-168 , alnlength 366 , Bacteria , Proteobacteria , WP\_182309949.1 hypothetical protein  
 [Wolbachia pipientis]"  
 /translation="MLRRLECERQASSCIDEISSQAELHIGEGDDEDYFTGEKGRVLG  
 DFWNFFESLFLNLFVDVDDPKIYQMLKEKKEKNWLLSIKFLRDKLKELIKIFARDL  
 SFNQRLDKEIKELQEKLGSSELSEEEFARALERLTALQDLKLRLQMAVVGWIVTMFAE  
 MFGVELAAAVEASTEKEDKKAECTSLKEENKEVCENVEIKLDEREKPVPVFLFEISP  
 GFVRPVVLSKPELDLLPKPIMPISIFKEVINNENREEIKPKVEEEKKAKPEEPKKEVCP  
 QKVPEKPREEVPEKVQSAGSRTSSKKSRIKINRDSFPAHNYPIGDWQEQASNGKSNAST  
 AQPPKRLIDDVKVNNHVDSIGKAPEKAPSRG"  
 /product="hypothetical protein"  
 /besthit="qcoverage 100.27397260274 , hcoverage 85.1162790697674 , similarity 83.1 , identity 80.1 ,  
 evalue 3.78e-168 , alnlength 366 , Bacteria , Proteobacteria , WP\_182309949.1 hypothetical protein  
 [Wolbachia pipientis]"

gene 10113..10226  
 /locus\_tag="wEsol\_00313"

CDS 10113..10226  
 /locus\_tag="wEsol\_00313"  
 /codon\_start=1  
 /transl\_table=11  
 /fullproduct="qcoverage 100 , hcoverage 100 , similarity 100 , identity 100 , evalue 1.09e-14 , alnlength 37 ,  
 Bacteria , Proteobacteria , QEF50483.1 putative  
 excinuclease ABC, B subunit [Wolbachia endosymbiont of  
 Drosophila ananassae]"  
 /translation="MPKSIIKSISNTLQEKVVIEAKANINKDNLKKAHARV"  
 /product="putative excinuclease ABC, B  
 subunit"  
 /besthit="qcoverage 100 , hcoverage 100 , similarity 100 , identity 100 , evalue 1.09e-14 , alnlength 37 ,  
 Bacteria , Proteobacteria , QEF50483.1 putative  
 excinuclease ABC, B subunit [Wolbachia endosymbiont of  
 Drosophila ananassae]"

gene 10386..11675  
 /locus\_tag="wEsol\_00314"

CDS 10386..11675  
 /locus\_tag="wEsol\_00314"  
 /codon\_start=1  
 /transl\_table=11  
 /pfam="SHOCT"  
 /fullproduct="qcoverage 100.2331002331 , hcoverage 100 ,  
 similarity 85.1 , identity 82.1 , evaluate 4.98e-209 ,  
 alnlength 430 , Bacteria , Proteobacteria ,  
 WP\_182309949.1 hypothetical protein [Wolbachia  
 pipientis]"  
 /translation="MVESFSGNNRGNNFIEEAKIMENFSDNNGNGSSIFQGKLREQDF  
 SAEQKLNELKAAIEELARQDLLRRLECEERQASSCIDEISSQAELHIGEGDDEDYFTGE  
 KGRVLGDFWNFFESLFLNLFVDVDDPKIYQMLKEKKEKNWLLSIKFLRDKLKELIK  
 IFARDLSFNQRLDKEIKELQEKLGSGELSEEEFARALERLTALQDLKLRLQMAVVGWI  
 VTMFAEMFGVELAAAVEASTEKEDKKAEKTSLKEENKEVCENVEIKLDEREKPKVPVF  
 LFEISPGFVRPVLSKPELDLLPKPIMPISIFKEVINNENREEIKPKVEEEKKAKPEEP  
 KKEVCPQKVPEKPREEVPEKVQSAGSRTSSKKSRIKINRDSFPAHNYPIGDWQEASNG  
 KSNASTAQPPKRLIDDVKVNHNHVDSIGKAPEKAPSRG"  
 /product="hypothetical protein"  
 /besthit="qcoverage 100.2331002331 , hcoverage 100 ,  
 similarity 85.1 , identity 82.1 , evaluate 4.98e-209 ,  
 alnlength 430 , Bacteria , Proteobacteria ,  
 WP\_182309949.1 hypothetical protein [Wolbachia  
 pipientis]"

gene 12096..12290  
 /locus\_tag="wEsol\_00315"

CDS 12096..12290  
 /locus\_tag="wEsol\_00315"  
 /codon\_start=1  
 /transl\_table=11  
 /fullproduct="qcoverage 96.875 , hcoverage  
 93.9393939393939 , similarity 83.9 , identity 77.4 ,  
 evaluate 1.10e-21 , alnlength 62 , Bacteria ,  
 Proteobacteria , WP\_191111146.1 hypothetical protein  
 [Candidatus Wolbachia massiliensis]"  
 /translation="MDSNKGSGYEKRKYGDNTAPGGGRIRADAIDPRRVDDFTERIKR  
 EEERRKQNQSSGQGSGRSGK"  
 /product="hypothetical protein"  
 /besthit="qcoverage 96.875 , hcoverage 93.9393939393939 ,  
 similarity 83.9 , identity 77.4 , evaluate 1.10e-21 ,  
 alnlength 62 , Bacteria , Proteobacteria , WP\_191111146.1  
 hypothetical protein [Candidatus Wolbachia massiliensis]"

gene 12328..14520  
 /locus\_tag="wEsol\_00316"

CDS 12328..14520  
 /locus\_tag="wEsol\_00316"  
 /codon\_start=1  
 /transl\_table=11  
 /fullproduct="qcoverage 100 , hcoverage 102.097902097902  
 , similarity 78.1 , identity 68.8 , evaluate 0.0 ,  
 alnlength 730 , Bacteria , Proteobacteria ,  
 WP\_065106813.1 hypothetical protein [Wolbachia  
 endosymbiont of Nomada ferruginata]"  
 /translation="MPNIMNQELVRAFNIILCHNEVAITNLIVQSTDQTFLKKEDRIV  
 ISFDKNMDVGQCMKYLNHNIKSIVETFCGSESGANMSFNTQFFPFNLNERQLTKDKEG  
 YKFSVPIDKGVVFNLKCLLAHGLAKDAKEDMGNEFGERCMEGRVYDVRFRDRKSYLYCM  
 RFYDKKLQDYFVESFSRIKKNYKNGPKSTNDFLKIKNVCVYIKGSIFNKAKFIKDIVK  
 HKASLECRDFEVTSAEDETVESLKFVPVIDLSRTVGIPINSVLHVSYTGSGENSVLIPA

```

AKEIIDNIIYYKILSKEQADDINKVFGMTVLNNVEDCISPKHLPVFGRGRIYGIDFAN
QDISYCVLNKIMESSVINKDHELAIIDPELPRTLAEASQTRGCPKRSRGKGLERPPRQ
GSEREGGKGGFLQLVPGKIDSSQSTGDQSQLSSGEIDLSQSTGDQSQLSLGAGEGTLT
EANIQDQKRSSSIPSLRAWDSSTFLNSEDLSKDTENICNEEPEKQQVTDESDRKSSDE
CSKAKPQDSKSPEKKHGDGLLCSNSSIGSMWSKLKGNVLP SLKRNNKGRGSVYSISS
VSAPGGSVPEKLPVSESSSSFPGRKAKSNPPSAVTSPTHEGVPEWQQRLNPDQREEL
RPFLSPEERKKLNSNYFSPGEEWHLYLTRTLGKRELSRFLCESEESQLRRLAEQALS
SPDNSSSKKVDRDSGFCSMGSPAVQHKGSPSEVKECEVEPVSEALRK"
/product="hypothetical protein"
/besthit="qcoverage 100 , hcoverage 102.097902097902 ,
similarity 78.1 , identity 68.8 , evaluate 0.0 , alnlength
730 , Bacteria , Proteobacteria , WP_065106813.1
hypothetical protein [Wolbachia endosymbiont of Nomada
ferruginata]"
gene complement(14500..14769)
/locus_tag="wEsol_00317"
CDS complement(14500..14769)
/locus_tag="wEsol_00317"
/codon_start=1
/transl_table=11
/product="hypothetical protein"
/translation="MTNSLKIVPVIESGSFFLPQQAVWLSDFEYEILMFPEARHDDQV
DSTAQYLQWMRKTNNTSAFRVRDFGSNPKNKTLGWISKNLNLFSQL"
/besthit="qcoverage 87.6404494382023 , hcoverage
19.4513715710723 , similarity 89.7 , identity 80.8 ,
evaluate 1.85e-37 , alnlength 78 , Eukaryota , Arthropoda ,
GFS78656.1 terminase [Nephila pilipes]"
gene complement(14726..15493)
/locus_tag="wEsol_00318"
CDS complement(14726..15493)
/locus_tag="wEsol_00318"
/codon_start=1
/transl_table=11
/product="hypothetical protein"
/pfam="Terminase_6"
/translation="MLVMHRLHLEDLTGHLLSKPKNIWHHICLPMISENKEVIYSINN
HTGVIPTPPPVIPVPRHWDPENSTAKDWIPASSAGMTLPARVLYSREENELLYPLEGG
REEVEMIKVELGSYAFAAQYQQNPLPLSSGIIKQEWLKRYKNFPDNP SHVTQSWDTAV
STNDSSDFSICTTWAKIDNKFYLLDVYRAKLEYPKLKEQVLSLAARWTPHAILIEAKT
SGQQLTQELKANSDLPIIEIIPHNDKLTQNC SGDRVW"
/besthit="qcoverage 96.8627450980392 , hcoverage
48.1481481481481 , similarity 99.2 , identity 97.6 ,
evaluate 1.35e-172 , alnlength 247 , Bacteria ,
Proteobacteria , MBV2146448.1 phage terminase large
subunit [Wolbachia endosymbiont of Pissodes strobi]"
gene complement(15496..15864)
/locus_tag="wEsol_00319"
CDS complement(15496..15864)
/locus_tag="wEsol_00319"
/codon_start=1
/transl_table=11
/product="hypothetical protein"
/translation="MLRGPHGYWATARIIVASYSKLLSEKHSLDTRCIMQSDWYKELF
PEVELSKDQNTKYKFQTVQRGYRIATSVGGTTLTGEGGDFIIVDDPLNPAQALSETFRK
RATNWFDQTLVTRLNDRKKE"
/cog="COG5410 COG5410 305 Uncharacterized protein
conserved in bacteria"
/besthit="qcoverage 99.1803278688525 , hcoverage
62.0512820512821 , similarity 100 , identity 99.2 ,
evaluate 7.58e-82 , alnlength 121 , Bacteria ,

```

Proteobacteria , RLT59430.1 hypothetical protein  
WANA31\_0872 [Wolbachia endosymbiont of Drosophila  
ananassae]"

gene complement(15803..16048)  
/locus\_tag="wEsol\_00320"

CDS complement(15803..16048)  
/locus\_tag="wEsol\_00320"  
/codon\_start=1  
/transl\_table=11  
/fullproduct="qcoverage 100 , hcoverage 100 , similarity  
100 , identity 98.8 , evalue 9.11e-55 , alnlength 81 ,  
Bacteria , Proteobacteria , CDR79199.1 phage  
protein,Transposase and inactivated derivatives  
[Wolbachia endosymbiont of Drosophila simulans wAu]"  
/translation="MDNINFLKFIELCFQTVVPGCEYNDYQYIKVIADRLEAANAGEV  
RRIIFNMPPRSMKSICMSVAWPAWILGNCKNNSCKLF"  
/product="phage protein,Transposase and  
inactivated derivatives"  
/cog="COG5410 COG5410 305 Uncharacterized protein  
conserved in bacteria"  
/besthit="qcoverage 100 , hcoverage 100 , similarity 100  
, identity 98.8 , evalue 9.11e-55 , alnlength 81 ,  
Bacteria , Proteobacteria , CDR79199.1 phage  
protein,Transposase and inactivated derivatives  
[Wolbachia endosymbiont of Drosophila simulans wAu]"

gene 16120..16500  
/locus\_tag="wEsol\_00321"

CDS 16120..16500  
/locus\_tag="wEsol\_00321"  
/codon\_start=1  
/transl\_table=11  
/fullproduct="qcoverage 100 , hcoverage 100 , similarity  
100 , identity 100 , evalue 1.16e-87 , alnlength 126 ,  
Bacteria , Proteobacteria , AOV87106.1 transposase  
[Wolbachia endosymbiont of Drosophila incompta]"  
/cog="COG3293 COG3293 124 Transposase and inactivated  
derivatives"  
/pfam="DUF4096"  
/product="transposase"  
/translation="MRKKYPTDLSEREWARIEKHFRVSYKKGGRPPKYSKREILEAIF  
YVLRITGCQWRYLPNDFPLWKTVYEQFRQWKKQGIFEKMNIEITKYSRRKIGRNEQPSA  
CIVDSQSVKTTEKGGSKAMMEVKK"  
/besthit="qcoverage 100 , hcoverage 100 , similarity 100  
, identity 100 , evalue 1.16e-87 , alnlength 126 ,  
Bacteria , Proteobacteria , AOV87106.1 transposase  
[Wolbachia endosymbiont of Drosophila incompta]"

gene 16611..16952  
/locus\_tag="wEsol\_00322"

CDS 16611..16952  
/locus\_tag="wEsol\_00322"  
/codon\_start=1  
/transl\_table=11  
/fullproduct="qcoverage 100 , hcoverage 100 , similarity  
100 , identity 100 , evalue 1.53e-79 , alnlength 113 ,  
Bacteria , Proteobacteria , AAS13810.1 transposase, IS5  
family, OrfB [Wolbachia endosymbiont of Drosophila  
melanogaster]"  
/cog="COG3293 COG3293 124 Transposase and inactivated  
derivatives"  
/pfam="DDE\_Tnp\_1\_2 DDE\_Tnp\_1"

```

/product="transposase, IS5 family, OrfB"
/translation="MRTKYTKVKKMWADMGYQGRNLKNHIKEEYDIDIEIVKRPPCRF
WVHKDTPPELLPTREQGFKVQPRRWVVERTFAWVNRNRRLSKEYDLLTTSTENFIYLA
MSRVMLKREYA"
/besthit="qcoverage 100 , hcoverage 100 , similarity 100
, identity 100 , evalue 1.53e-79 , alnlength 113 ,
Bacteria , Proteobacteria , AAS13810.1 transposase, IS5
family, OrfB [Wolbachia endosymbiont of Drosophila
melanogaster]"
gene 17031..17378
/locus_tag="wEsol_00323"
CDS 17031..17378
/locus_tag="wEsol_00323"
/codon_start=1
/transl_table=11
/fullproduct="qcoverage 100 , hcoverage 100 , similarity
100 , identity 100 , evalue 2.74e-74 , alnlength 115 ,
Bacteria;Eukaryota , Proteobacteria;Arthropoda ,
WP_155968342.1 MULTISPECIES: IS630 transposase-related
protein [Wolbachia]"
/cog="COG3415 COG3415 138 Transposase and inactivated
derivatives"
/pfam="HTH_Tnp_IS630 HTH_Tnp_1 HTH_23 HTH_28 HTH_29 HTH_7
CENP-B_N Pfam-B_14738 HTH_8 HTH_17 HTH_24 Pfam-B_2106"
/product="IS630
transposase-related protein"
/translation="MAYSVDLRERAVSMIEKGKSKVEVAELLEIGIATLYRWLRKKAA
GESLRPSKNGSFIRKIDPKILEEYVKNPDHTLAEMKQNLGFGINSIWYRLKQLRITL
KKSYSITISRAQSRR"
/besthit="qcoverage 100 , hcoverage 100 , similarity 100
, identity 100 , evalue 2.74e-74 , alnlength 115 ,
Bacteria;Eukaryota , Proteobacteria;Arthropoda ,
WP_155968342.1 MULTISPECIES: IS630 transposase-related
protein [Wolbachia]"
gene 17578..17889
/locus_tag="wEsol_00324"
CDS 17578..17889
/locus_tag="wEsol_00324"
/codon_start=1
/transl_table=11
/fullproduct="qcoverage 100 , hcoverage 100 , similarity
100 , identity 100 , evalue 1.60e-74 , alnlength 103 ,
Bacteria , Proteobacteria , WP_155968470.1 transposase
[Wolbachia pipientis]"
/cog="COG3335 COG3335 132 Transposase and inactivated
derivatives"
/pfam="DDE_3 DDE_1"
/product="transposase"
/translation="MTFKGGCDKEVFNTWLEKMLLPKLPHGTTIVMDNATFHKTPKTK
ELIDNARCRLLYLPTYSPLNPIEHCWNTIKSRLRPLMHKYTDLQLLVGNTIMEIYHS
F"
/besthit="qcoverage 100 , hcoverage 100 , similarity 100
, identity 100 , evalue 1.60e-74 , alnlength 103 ,
Bacteria , Proteobacteria , WP_155968470.1 transposase
[Wolbachia pipientis]"

```

#### ORIGIN

```

1 tgccttaaca tactgatttt cgcaatgggc ttacctccgc taatgtggga atattgaagc
61 aaaagtgatg tcattccagt gcttgacact gggatggctt tgttgcatag caactgaaaa
121 aatctggtgg ctactgacaa aattcattat aaaatagcca tttaaccttg aaagaaaaaa
181 tatgccacaa aaaatgaggg tcagtaacca tagcgaatat aacaaatttc tagaaaaaag

```

|      |             |             |             |             |             |             |
|------|-------------|-------------|-------------|-------------|-------------|-------------|
| 241  | aggaaatatt  | tttcattata  | tcaacgaagc  | catagaaaag  | tggtacgaga  | atggtccaaa  |
| 301  | aataaccaggt | ggcaacaata  | tttatagcga  | taaagttgta  | attttgggtgc | acataataac  |
| 361  | ttgttttattt | agaataggcc  | tgaggcaaac  | agttgggttt  | atagcaggat  | accttgagca  |
| 421  | aattgggaaa  | aatttgcaag  | ttatcagcta  | ttcacaatca  | tcaagaaggt  | ttaagaaact  |
| 481  | caatattaag  | atcaatgatt  | gcagaaaata  | atatggaaga  | catcgaaatt  | gctatagaca  |
| 541  | gtacaggaat  | tagtatatac  | aacaacactc  | ctggtcatag  | caaagaaaat  | agcgaagata  |
| 601  | gaaagtatcg  | cagctatgaa  | cagacaagaa  | aattgcatgt  | aatggtgaat  | acaaacagca  |
| 661  | aaaaagccat  | agctgtaaaa  | tacagtaacg  | gctgatcact  | atggagcttg  | tgatttgcta  |
| 721  | aaagaagtcg  | attttcagta  | tgtcataaaa  | gtactatatg  | cagatagggc  | atatgacaga  |
| 781  | gaaaagctct  | ataagctgtg  | taatcaatat  | ggtataaaaa  | cgaaaattcc  | tccgaaaaac  |
| 841  | aacgcagcag  | agcatccaaa  | gtagactat   | atggctgaga  | gaaattctgc  | agtcaagctc  |
| 901  | ataaagtcac  | atgatgaaga  | tggtataaag  | aagtggaaaa  | aagagatgag  | ttatggaaaa  |
| 961  | agatcttata  | tagaagtttt  | ttctcgcgac  | tgaaacaaac  | attcgggatt  | tagtttttagg |
| 1021 | aataaatctg  | agacaaatag  | tgagaaggga  | actacttggt  | aaatgctatt  | tgctcaataa  |
| 1081 | gttcactgat  | attggtatgg  | ctaaatttga  | gatagcttca  | taaattttatt | gtgctgtacc  |
| 1141 | tactatccga  | agagcgatgc  | aacaaagcca  | tcccagtgct  | agctacttgg  | atgacagagg  |
| 1201 | ggggtgggat  | gacagaagat  | gatggagtga  | cagggagtaa  | tacaaaaagt  | ttcgtcatcc  |
| 1261 | ccattgaatc  | ggcttttaaaa | tcgatgttca  | aagttgaaat  | ttccctagaa  | gatgcgggga  |
| 1321 | aatcagaaa   | aggtcaggaa  | gttgatttaa  | ataacttgcg  | taattttaaag | aatcatgata  |
| 1381 | tttgttgtac  | gggtggtggg  | agtgtacct   | ttgcaatctg  | cagtttttatt | tatggttggtg |
| 1441 | tgaaacctat  | tcgtgttttt  | aatattttaa  | atgaggttta  | gatgtcgata  | acatccgaaa  |
| 1501 | agaaaaagag  | tttgataaat  | atatacgcaa  | ttaaagaaga  | tgatacaggc  | tcatcttttg  |
| 1561 | tacaatgtgc  | aattttgacc  | gagaggatca  | gtaacttaac  | tgagcatttt  | aaagtgcaca  |
| 1621 | agcatgacca  | tcactctaag  | cgtgggtttac | ttatatgat   | aggtagaaga  | cgcaagcact  |
| 1681 | taaattatat  | aaagcgtaaa  | tttggtaatg  | aagcctatca  | ggaattaata  | gagaagttag  |
| 1741 | gcattagaaa  | ataatcgagg  | aattttaatat | gttttaaaatt | ataaaaaaat  | ctatagagtg  |
| 1801 | gggtggtcgt  | gccttatctt  | tagaaacagg  | aaaaatagca  | cgccaagctc  | atggttcagt  |
| 1861 | agttgtaaat  | tacggtgata  | cttctgtttt  | agtaactgtt  | gtacgtaaaa  | agaaggaaga  |
| 1921 | aagcgttgat  | ttcctacctt  | taaatgtgca  | gtttatcgca  | aaaagctatg  | ccatgggtaa  |
| 1981 | gatccctggc  | gggttttttta | aaagagaagg  | caagccatct  | gatagagaaa  | ctttaatctc  |
| 2041 | aagagtaata  | gatagaagta  | taagaccact  | attcccagaa  | ggatttcatg  | atgaaattag  |
| 2101 | tgtggtgtgc  | aatctattaa  | cttatgatac  | agtcaatcct  | cctgaagtgc  | cagcattgat  |
| 2161 | tggtgctggt  | gcagctcttg  | caatttctgg  | tgttcccttt  | cactttacta  | tagctggagt  |
| 2221 | gatggttggt  | tgtgatgaaa  | ataataacta  | tatactcaac  | ccttctgttc  | aagagatgaa  |
| 2281 | agcaagcagc  | ttggatctgt  | ttttgtctgg  | tgatgaaaat  | tcaattttta  | tgggtgaatc  |
| 2341 | agaagtgaaa  | gagctctctg  | aagaaaatgt  | ttttaatgca  | ataaaaatttg | gccatgaaca  |
| 2401 | ccttaagcct  | gtcattaagc  | tcataaaaaga | gtttgctgat  | acaattggca  | ataaacctga  |
| 2461 | gagctttgccc | cctattgatg  | catcagatat  | aacacaagag  | ctcgaaaaat  | acggtaaaga  |
| 2521 | ttttgaaaaa  | gcataattcgc | aaacagtaaa  | acaagagcga  | gttcaagctc  | tagaagcgat  |
| 2581 | cagagagaat  | atattgaata  | ctcttaaga   | aactggaaaa  | gacgaaaagt  | taattacgta  |
| 2641 | tgcaagtaaaa | aactttgaaa  | gatcttttagt | acgtgaaata  | attaggaaga  | aaagtgtgaa  |
| 2701 | gatagacagt  | cgtaagcatg  | atgagatacg  | tcagatagaa  | gttgaagtgtg | atattctgtc  |
| 2761 | caaaactcac  | ggttctgcac  | tatttacaag  | aggcaatact  | caggcactgg  | ttgttactgc  |
| 2821 | tcttggcacc  | actcaagatg  | agcaaattgt  | ggatgatatt  | gaaggggata  | gacgtgagca  |
| 2881 | tttcatgttg  | cattataact  | ttccctcatt  | tgctgttgga  | gaaacttctg  | ctgcgcgtgc  |
| 2941 | accaggaaga  | agagaaatcg  | gtcatggcaa  | acttgcttgg  | aaagcaattc  | atcctgtttt  |
| 3001 | acccgataag  | tctgaatttc  | cttatacaat  | aagagtagtg  | tccgaaattt  | tggagtctga  |
| 3061 | tggttctttct | tctatggcaa  | cagtttgtgg  | gacttctctt  | gcttttaattg | atacgggtgt  |
| 3121 | gccataaaag  | gcccctgttg  | ctggaattgc  | tatgggtctc  | atcaaagata  | aagacgagta  |
| 3181 | tgtataactt  | tccgatatac  | ttggtgatga  | agattatctt  | ggtgatatgg  | acttttaaagt |
| 3241 | agcaggaact  | agtgaagggg  | ttacggcgct  | acaaatggac  | atgaaaaatt  | ctggtataag  |
| 3301 | ctttgaaatt  | gttgaaaaat  | ctttagaaca  | ggcaaaaagct | ggaagattac  | atattttaga  |
| 3361 | aaaaatgaat  | gcagtgatgt  | cagaacacag  | tgatgatgtc  | aaagaccatg  | caccaaggat  |
| 3421 | gttatcattt  | tacatagata  | aagacaaaa   | ttctgctgct  | ataggttcta  | aggggaaaaa  |
| 3481 | tatacgcagt  | gtgtgtgaaa  | gaagtaatgc  | aaaaattgaa  | ataggagatg  | atggttaaagt |
| 3541 | ttctgttttt  | gctacgagtg  | gcactgaagc  | tgaaattgca  | aagagtatga  | tgattgattc  |
| 3601 | aataacagaa  | ctagaacaag  | gttctatagt  | tgatgtcaag  | gttgtaagaa  | tagagaagtc  |
| 3661 | tattgtagag  | cttgaatttc  | ttaatggcag  | aaaaggaaaa  | atgcacataa  | gtgaagtagc  |
| 3721 | taatgaacat  | atagattcta  | tagagagcgt  | acttaaacaa  | gatgatactt  | tcaaagcact  |
| 3781 | agtaattgac  | ttcgaaaaag  | gtgggtgtcc  | aaagttgtca  | agacgtcggg  | ttgaccaaga  |

|      |             |             |             |              |             |             |
|------|-------------|-------------|-------------|--------------|-------------|-------------|
| 3841 | gacgggagag  | ttttttgaag  | gtgagcttta  | caacgaggaa   | aggaaagatg  | gtccaaatga  |
| 3901 | cagggataat  | tattacaata  | attcatttag  | tagaaaacct   | ggaggaagtc  | accataagag  |
| 3961 | gcctcctcgt  | cctcgttctg  | gtttcagcaa  | cagaaatagg   | ccgaaatttg  | gtaataatga  |
| 4021 | ttcatcatca  | ggtttttatt  | aagagtaaac  | ttcttgcggt   | acctctcgtc  | attccagtgc  |
| 4081 | ttaacactgg  | aatgacaccc  | tttctgggtga | aggttgttct   | caaatcacia  | tgtagtagta  |
| 4141 | attgtgggtg  | tagctatagc  | taacccaagg  | tatccgttca   | gcggagtggg  | agaataaggt  |
| 4201 | agacaaagca  | agataataaa  | gataatcata  | gagcaaaaag   | gaggtaatgt  | ggtaaaccct  |
| 4261 | ttagaacttt  | gcaaaaattt  | acagcaaaaa  | atagaaaaac   | tggaagcaga  | gatagaaaac  |
| 4321 | ttaaaagcag  | aaaataaagc  | tttaaagata  | gagaacgctg   | aattaaagga  | aaggctcggg  |
| 4381 | ttaaattcaa  | aaaactcatc  | cctgcccagc  | tcaaaaagagc  | tatacaaaat  | aaaaaaggac  |
| 4441 | aagccaaaaa  | gcgaaaggaa  | tggtggcgat  | caggttgggc   | ataaaggaaa  | ttttcatgcc  |
| 4501 | acaatggaag  | cggataaagt  | agtaaaaaata | gagttgccta   | atatttgcg   | atgcggagga  |
| 4561 | gagcttgtaa  | tatgcaaaaa  | accttatgtt  | cacaaaaaag   | ttgatcttcc  | ggaaattagg  |
| 4621 | ccttatgtag  | tatagcattt  | ctcataatag  | tccgaacagg   | tcataggaag  | gcagaatcaa  |
| 4681 | cagcacgacg  | aaaggattcg  | aatagaggaa  | tgtttttcct   | ggctctgttt  | tttatagcaa  |
| 4741 | accaatgatg  | ctcaattttg  | ttgaaatctg  | gagaataagg   | cggcagatac  | aaaatttctg  |
| 4801 | caccaacccc  | tttagcaagc  | tcgataatct  | tatcagactt   | atgaaaagta  | gcattgtcaa  |
| 4861 | gaatgacagt  | ctgtccaggt  | tccaagatcg  | gtgtcaaaaa   | ttgctcaacc  | catccattaa  |
| 4921 | aaacatccat  | attacagtgg  | ccttcaaagg  | ttaacggaac   | aactatcttt  | cttccactta  |
| 4981 | aggctgcaac  | catactgatt  | cgttgagttt  | tctttccaga   | ttttaaggca  | taaaaccgct  |
| 5041 | gtcctttctg  | gcaatatccg  | taggggtagt  | cttcggtgtt   | atcaatgcca  | gactcatcta  |
| 5101 | tatacactaa  | gttttttaggt | tcttttgctg  | ctataatttt   | caaaaattca  | gcacgttttt  |
| 5161 | cttcgtttct  | ttccttgtat  | ccatatgtct  | ttttttgctg   | gtaaatccaa  | tttttttaag  |
| 5221 | ggctcgatag  | atcgtttgga  | tactaacgtt  | gttccaaagt   | ttagccattt  | ccgatagagt  |
| 5281 | ctttcctccg  | tggtctctgg  | caaatttggt  | aaaggtatcc   | cagtcggtaa  | ttttgtgatt  |
| 5341 | gtaaccccca  | tttccaagtt  | tttttgattg  | aaagtctcct   | gtttcttttc  | ttctttgctg  |
| 5401 | ccactcccat  | aaagtagttc  | gtccaatctt  | aaatcttgct   | gccactgttt  | ctctgctttc  |
| 5461 | tccttcgtct  | agcgcttcca  | ttgctttttt  | tcttaaatca   | taataccaat  | tctcactgca  |
| 5521 | caacaaacag  | atagacaata  | atggaaaaaa  | agccatacta   | aactaagtgt  | aatagcgagg  |
| 5581 | tataaatggc  | attaagatca  | aaattattgg  | atgaaaaagt   | agtggaatcg  | gcaaaagcaa  |
| 5641 | tgctgaagaa  | agtaagaaac  | aacgcatacg  | ttacaaaaaa   | actaaatgct  | gtaattgcag  |
| 5701 | caaaaaagca  | cagcataaca  | gcggtagcaa  | agatatgttg   | catttcaaga  | actgcactga  |
| 5761 | ctgcgtggat  | aaagcaccta  | aaatttaaca  | gagaggaaaa   | attgtttgct  | ccccctcaac  |
| 5821 | gtcgtagaaa  | aactagattg  | aatcaaagtc  | aacgtgaaca   | agttgaagca  | tggataacaag |
| 5881 | aaaatcctaa  | tatcaccatt  | aaagaaatga  | gaataaaaaat  | ccaggaaaga  | tttggtttgg  |
| 5941 | atatcagtaa  | gtccacagta  | caccgtaata  | tgcaaagaat   | gaaattctca  | tatattactc  |
| 6001 | caagaccagt  | tcataatggt  | caagataaaa  | gcaaacacaaga | ggagtttaaa  | aaaaaatctc  |
| 6061 | aacgaaacta  | ttggcaaaata | tccagaaaaa  | gagctatttt   | tctttgatga  | gtctcggttt  |
| 6121 | ggcacacatt  | caaaaattgg  | acatgggtgg  | tttaaaaaaag  | gcattaggac  | acagggttaaa |
| 6181 | ataaaaattag | gtaggcaaaa  | tttctatctc  | tatagtgcgg   | ttaatcctag  | aaatggagag  |
| 6241 | agttctagct  | caaattgtcaa | cactgattgc  | atgaatatat   | ttcttgagca  | gatgtcgcga  |
| 6301 | tatctaggaa  | tacgagagac  | ttttctcggt  | atggactgtg   | ctagttggca  | taggtcaaaa  |
| 6361 | aattttaaagg | tacctaaaaa  | tatcgatatt  | atataacctac  | ctccatactc  | acctgagctc  |
| 6421 | aatcctgttg  | agagggtttg  | gttatatata  | aaacagaaca   | ttttgtgcaa  | taaaatatac  |
| 6481 | gatacaatta  | ccctgcttga  | gcgcactttg  | tgtaaaatttg  | ttacctctct  | taccactctc  |
| 6541 | ataattaaac  | aactctgcaa  | tgtctcctat  | ttgtcctcct   | aataatgaga  | attggtataa  |
| 6601 | cttgctgttt  | ttcagggttc  | tcattacaaa  | tgttctccgt   | atctttttaga | gaatcttcag  |
| 6661 | aattttagaa  | tgttgaacta  | tcccatgctc  | taagagaagg   | aatcgatgat  | gatcttttct  |
| 6721 | gatcctgaat  | attagcctct  | gttagcgtac  | cttcaccagc   | acctaaagat  | agctgtgatt  |
| 6781 | gatcaccagt  | ggattgactt  | agatctattt  | ccccggaaga   | tagctgtgat  | tgatcaccag  |
| 6841 | tggattgact  | tgaatctatt  | ttccccggca  | ccaactgaaa   | cagccccctt  | tttctcctct  |
| 6901 | ctctttccga  | tccttgcttg  | ggaggcctct  | ctaacccttt   | accacgaact  | cgcttgggac  |
| 6961 | acccccgtgt  | ctgtgatgct  | tcagctaata  | gcgttcgagg   | aagctcaggg  | tcaatggcca  |
| 7021 | gttcatggtc  | tttggtgatt  | acagagcttt  | ccatgatttt   | attcagcaca  | caataagaaa  |
| 7081 | tgtcttgatt  | agcaaaaatct | attccgtata  | ttcctctcct   | gccaaatact  | ggtagatgtt  |
| 7141 | ttggtgaaat  | acaatcttca  | acattattta  | acacggtcat   | accaaatact  | ttattaatat  |
| 7201 | catccgcttg  | ttccttgctt  | aaaattttat  | aatatataat   | attatcaata  | atttccttag  |
| 7261 | cagcaggtat  | aagaactgaa  | ttttcaccac  | tgctgtgata   | agaaacatga  | agtacagaat  |
| 7321 | taattgggat  | acctactgta  | cgagacaaat  | caatcactgg   | aaacttttaga | ctctcaacag  |
| 7381 | tttcatcctc  | agcacttgta  | acctcaaaat  | cacgacattc   | caaagatgct  | ttgtgtttta  |

|       |             |             |             |             |             |             |
|-------|-------------|-------------|-------------|-------------|-------------|-------------|
| 7441  | ctatgtcctt  | aatgaactta  | gccttattaa  | agatgctccc  | ctttatatac  | acacaattgt  |
| 7501  | ccttgatttt  | caaaaaatca  | ttagtgcttt  | taggaccatt  | tttataattt  | tttatccttg  |
| 7561  | acgagaatga  | ctctacaaaa  | taatcttgta  | actttttatc  | atagaaacgc  | atacaatata  |
| 7621  | gataagattt  | cctgtcaaaa  | cgtacatcat  | atacgcgccc  | ttccatacat  | ctctcaccaa  |
| 7681  | attcgtttcc  | catatcctct  | tttgcattct  | ttgcaagccc  | atgggctagc  | aaacatttta  |
| 7741  | gattaaaaac  | tacacctttg  | tctattggca  | ctgaaaactt  | atatccctcc  | ttatctttag  |
| 7801  | ttaactgcct  | ttcattaagg  | ttaaaaggaa  | aaaactgtgt  | attaaaagac  | atattagcac  |
| 7861  | cacttttact  | cccacaaaat  | gtttctacta  | tgcttttctt  | tatatgtgtc  | aagtacttca  |
| 7921  | tgcatcgacc  | aacatccata  | tttttatcaa  | atgagataac  | aatacgatct  | tccttcttaa  |
| 7981  | gaaaagtttg  | atctgtgctt  | tgtacgataa  | gattagtaat  | agcaacctca  | ttatgacaaa  |
| 8041  | gaataatggt  | aaatgctctt  | actaattctt  | gattcattat  | attaggcata  | atacccttcc  |
| 8101  | ctattcaaat  | taccataaat  | ttactgttac  | ttaccacttc  | tgccactacc  | ttgaccacta  |
| 8161  | gattgatttt  | gcttccttct  | ctcctcctca  | cgcttaattc  | tctctgtaaa  | gtcatcaact  |
| 8221  | ctccttggat  | ctatagcatc  | cgctctaatt  | cttcctcctc  | ctgggtgcagt | attatcgcca  |
| 8281  | tattttcgtt  | tttcataaacc | tgaaccttta  | ttactatcca  | tattatcccc  | cagtaaaaaat |
| 8341  | attatgtaac  | taatatacta  | aaaataaaaat | taagtgcagg  | cacttttttta | tattttttttt |
| 8401  | taaaaaat    | tattcactct  | ttttcataaa  | acccaaat    | caagattcca  | gcgtcacacg  |
| 8461  | ctggaatgac  | aagtcattgg  | caaccctaag  | ttccctacgt  | cataccgcga  | ttcattcgcg  |
| 8521  | gtatctcaag  | catagattcc  | gctaacacgt  | agcggaatga  | cgaactgtcg  | acatctatct  |
| 8581  | atatgcccct  | ggattccagc  | gtcacgcgct  | ggaatgacac  | ctgtatttct  | ctttgccatc  |
| 8641  | aatccctact  | ctttaatgtc  | ataccagtac  | ctctttttct  | tgtcatccca  | gtgtccagac  |
| 8701  | actgggatcc  | agtctttttt  | gtcatctaaa  | gctaacacta  | gctatcccct  | cgatgggtgt  |
| 8761  | ttttctgggt  | cctttcctat  | tgaatccaca  | tgattattaa  | cttttacatc  | atcaatcaat  |
| 8821  | ctttttgggt  | gttgagcagt  | actagcatta  | gactttccat  | tagaagcttg  | ctcttgccaa  |
| 8881  | tcaccaattg  | gataattgtg  | tgcaggaaaag | ctatcccgat  | tgatttttct  | tgatttcttg  |
| 8941  | ctactagttc  | tagaacctgc  | actctgtact  | ttttctggca  | cctcctccct  | aggcttctcc  |
| 9001  | ggaactttct  | gtggacacac  | ctctttcttc  | ggttcctccg  | gcttcgcttt  | tttctcttct  |
| 9061  | tctacttttg  | gttttatattc | ctcgcggttc  | tcattgttta  | taacctcttt  | aaatatagaa  |
| 9121  | ggcattatag  | gctttggtaa  | aagatcaagt  | tctgggtttgc | tcagaacaac  | cggctcttaca |
| 9181  | aatcctgggt  | aaatttcaaa  | aaggaaaact  | ggcacttttag | gtttttctct  | ttcgtctaac  |
| 9241  | ttgatttcta  | cgttttcgca  | aacttcttta  | ttttcttcct  | ttaatgatgt  | tttttctgct  |
| 9301  | tttttatctt  | ctttttctgt  | agatgcctct  | accgcagccg  | ccaactcaac  | tccaaacatc  |
| 9361  | tctgcgaaca  | ttgtaacaat  | ccatccgaca  | acggccattt  | gtaacctgag  | tttcagatct  |
| 9421  | tgcaatgcag  | ttaatctttc  | taacgcctt   | gcaaaactct  | cttctgataa  | ctcaccactg  |
| 9481  | cctaattttt  | cctgcaattc  | ttttatctct  | ttgtccaacc  | tctgattgaa  | acttaaactcg |
| 9541  | cgtgcaaaaa  | tcttcttgat  | taactcctta  | agcttatcac  | gcaaaaaact  | aattatcgaa  |
| 9601  | agaagccaat  | ttttttcttt  | cttctccttg  | agcattttgt  | agattttcgg  | atcatctaca  |
| 9661  | tctacttcaa  | aaaggttgaa  | gagagattca  | aagaaattcc  | agaaatctcc  | gagtactctt  |
| 9721  | cctttttcac  | cagtgaagta  | atcctcatca  | tcaccttctc  | cgatatgtag  | ctctgcttga  |
| 9781  | gatgatattt  | catcgatata  | actagaagcc  | tgacgctcac  | actcgagcct  | cctgagcaaa  |
| 9841  | tcttgtctgg  | tgagctcctc  | tacgcactgc  | ctctattgct  | ctgatatagc  | taaagtgact  |
| 9901  | tacgataatt  | tgaaaaacaa  | aaattcgtca  | ttccgctact  | tgttagcgga  | atctataccg  |
| 9961  | cgaatgaatc  | gcggtatgac  | gtaggactgc  | tgtcatccca  | gtgcgtgaca  | ctgggatctc  |
| 10021 | gttccttaac  | tttatagtgt  | aaattatttc  | aaattgtgtc  | tagctgcaag  | tataataatt  |
| 10081 | tccattttata | gataaagtat  | gttgcaaatg  | ttatgccaaa  | gagtataata  | aaatctatat  |
| 10141 | caaatacttt  | acaagaaaaa  | gtgggtgatag | aggcaaaaagc | aaatatatta  | aaggataatt  |
| 10201 | taagaaaagc  | gcatgctaga  | gtttgaaaaa  | acagcaagaa  | taaaaaatat  | tattgaaagg  |
| 10261 | ttaaattggcg | tatgatataa  | tatagtgtaa  | agatataaat  | aattttattg  | acatctttac  |
| 10321 | attaatactt  | cttaaatatt  | tagtactgta  | gaattaaatt  | attaagtttt  | atgaagggag  |
| 10381 | taaaaatggt  | ggaaagcttt  | tcaggtaaca  | acagaggcaa  | taatttttatt | gaggaggcaa  |
| 10441 | aaataatgga  | aaatttttca  | gataataacg  | gaaacggtag  | ctcgatcttc  | caaggaaaac  |
| 10501 | tcaggggagca | agatttctct  | gcagagcaga  | agttaaatga  | actaaaagca  | gccatagagg  |
| 10561 | agctcgccag  | acaagatttg  | ctcagaaggc  | tcgagtgtga  | gcgtcaggct  | tctagtgtga  |
| 10621 | tcgatgaaat  | atcatctcaa  | gcagagctac  | atatcggaga  | aggtgatgat  | gaggattact  |
| 10681 | tactgggtga  | aaaaggaaga  | gtactcggag  | atttctggaa  | tttctttgaa  | tctctcttca  |
| 10741 | acctttttga  | agtagatgta  | gatgatccga  | aaatctacca  | aatgctcaag  | gagaagaaag  |
| 10801 | aaaaaaattg  | gcttctttcg  | ataattaagt  | ttttgcgtga  | taagcttaag  | gagttaatca  |
| 10861 | agaagatttt  | tgcacgcgat  | ttaagtttca  | atcagagggt  | ggacaaagag  | ataaaaagaat |
| 10921 | tgcaggaaaa  | attaggcagt  | ggtgagttat  | cagaagaaga  | gtttgcaagg  | gcggttagaaa |
| 10981 | gattaactgc  | attgcaagat  | ctgaaactca  | ggttacaaat  | ggccgttgct  | ggatggattg  |

|       |             |             |             |             |             |             |
|-------|-------------|-------------|-------------|-------------|-------------|-------------|
| 11041 | ttacaatggtt | cgcagagatg  | tttggagttg  | agttggcggc  | tgcggtagag  | gcattctacag |
| 11101 | aaaaagaaga  | taaaaaagca  | gaaaaaacat  | cattaaagga  | agaaaataaa  | gaagtttgcg  |
| 11161 | aaaacgtaga  | aatcaagtta  | gacgaaagag  | aaaaaccta   | agtgccagtt  | ttcctttttg  |
| 11221 | aaatttcacc  | aggatttgta  | agaccggttg  | ttctgagcaa  | accagaactt  | gatctttttac |
| 11281 | caaagcctat  | aatgccttct  | atattttaaa  | aggttataaa  | caatgagaac  | cgcgaggaaa  |
| 11341 | taaaacccaa  | agtagaagaa  | gagaaaaaag  | cgaagccgga  | ggaaccgaag  | aaagaggtgt  |
| 11401 | gtccacagaa  | agttccggag  | aagcctaggg  | aggaggtgcc  | agaaaaagta  | cagagtgcag  |
| 11461 | gttctagaac  | tagtagcaag  | aaatcaagaa  | aaatcaatcg  | ggatagcttt  | cctgcacaca  |
| 11521 | attatccaat  | tgggtgattg  | caagagcaag  | cttctaattg  | aaagtcta    | gctagtactg  |
| 11581 | ctcaaccacc  | aaaaagattg  | attgatgatg  | taaaagttaa  | taatcatgtg  | gattcaatag  |
| 11641 | gaaaggcacc  | agaaaaagca  | ccatcgaggg  | gatagctagt  | gttagcttta  | gatgacaaaa  |
| 11701 | aagactggat  | cccagtgtct  | ggacactggg  | atgacaagaa  | aaagaggtac  | tggatgaca   |
| 11761 | ttaaagagta  | gggattgatg  | gcaaagagaa  | atacaggtgt  | cattccagcg  | cgtgacgctg  |
| 11821 | gaatccaggg  | gcataatagat | agatgtcgac  | agttcgtcat  | tccgctacgt  | gttagcggaa  |
| 11881 | tctatgcttg  | agataccgcg  | aatgaatcgc  | ggtatgacgt  | agggaaactta | gggttgccaa  |
| 11941 | tgacttgctca | ttccagcgtg  | tgacgctgga  | atcttgaaat  | ttgggtttta  | tgaaaaagag  |
| 12001 | tgaataaaat  | tttttaaaaa  | aaaatataaa  | aaagtgcctg  | cacttaattt  | tatttttagt  |
| 12061 | atattagtta  | cataatat    | ttactggggg  | ataatatgga  | tagtaataaa  | ggttcaggtt  |
| 12121 | atgaaaaacg  | aaaatatggc  | gataaactg   | caccaggagg  | aggaagaatt  | agagcggatg  |
| 12181 | ctatagatcc  | aaggagagtt  | gatgacttta  | cagagagaat  | taagcgtgag  | gaggagagaa  |
| 12241 | ggaagcaaaa  | tcaatctagt  | ggtcaaggta  | gtggcagaag  | tggttaagtaa | cagtaaat    |
| 12301 | atggtaattt  | gaatagggag  | gggtattatg  | cctaataata  | tgaatcaaga  | attagtaaga  |
| 12361 | gcatttaaca  | ttattctttg  | tcataatgag  | gttgctatta  | ctaattctat  | cgtacaaagc  |
| 12421 | acagatcaaa  | cttttcttaa  | gaaggaagat  | cgtattgtta  | tctcatttga  | taaaaatatg  |
| 12481 | gatgttggtc  | aatgcatgaa  | gtacttgcac  | aatataaaga  | aaagcatagt  | agaaacattt  |
| 12541 | tgtgggagtg  | aaagtgggtg  | taatatgtct  | tttaatacac  | agttttttcc  | ttttaacctt  |
| 12601 | aatgaaaggc  | agttaactaa  | agataaggag  | ggatataagt  | tttcagtgcc  | aatagacaaa  |
| 12661 | ggtgtagttt  | ttaatctaaa  | atgtttgcta  | gcccattggg  | ttgcaaaaga  | tgcaaaagag  |
| 12721 | gatatgggaa  | acgaatttgg  | tgagagatgt  | atggaagggc  | gcgtatatga  | tgtacgtttt  |
| 12781 | gacaggaaat  | cttatctata  | ttgtatgcgt  | ttctatgata  | aaaagttaca  | agattatttt  |
| 12841 | gtagagtcac  | tctcgtcaag  | gataaaaaat  | tataaaaaatg | gtcctaaaag  | cactaatgat  |
| 12901 | tttttgaaaa  | tcaaggacaa  | ttgtgtgtat  | ataaagggga  | gcattcttta  | taaggctaag  |
| 12961 | ttcattaagg  | acatagtaaa  | acacaaagca  | tctttggaat  | gtcgtgattt  | tgaggttaca  |
| 13021 | agtgcgtgag  | atgaaactgt  | tgagagtcta  | aagtttccag  | tgattgattt  | gtctcgtaca  |
| 13081 | gtaggtatac  | caattaattc  | tgtacttcat  | gtttcttata  | caggcagtg   | tgaaaattca  |
| 13141 | gttcttatac  | ctgctgctaa  | ggaaattatt  | gataaatatta | tattattata  | aattttaagc  |
| 13201 | aagggaacaag | cggatgatat  | taataaagta  | tttgggtatga | ccgtgttaaa  | taatgttgaa  |
| 13261 | gattgtattt  | cacccaaaaca | tctaccagta  | tttggcagga  | gaggaatata  | cggaatagat  |
| 13321 | tttgctaata  | aagacatttc  | ttattgtgtg  | ctgaataaaa  | tcatggaaaag | ctctgtaatc  |
| 13381 | aacaaagacc  | atgaactggc  | cattgaccct  | gagcttcctc  | gaacgctatt  | agctgaagca  |
| 13441 | tcacagacac  | gggggtgtcc  | caagcgaagt  | cgtggtaaaag | ggttagagag  | gcctcccagg  |
| 13501 | caaggatcgg  | aaagagaggg  | aggaaaagg   | gggctgtttc  | agttgggtgc  | ggggaaaata  |
| 13561 | gattcaagtc  | aatccactgg  | tgatcaatca  | cagctatctt  | ccggggaaat  | agatctaagt  |
| 13621 | caatccactg  | gtgatcaatc  | acagctatct  | ttagggtgctg | gtgaaggtag  | gctaacagag  |
| 13681 | gctaataattc | aggatcagaa  | aagatcatca  | tcgattcctt  | ctcttagagc  | atgggatagt  |
| 13741 | tcaacattct  | taaattctga  | agattctcta  | aaagatacgg  | agaacatttg  | taatgaggaa  |
| 13801 | cctgaaaaac  | agcaagttac  | tgatgaaagt  | gatcgaaaaa  | gtagtgatga  | gtgttctaaa  |
| 13861 | gcaaagccac  | aagatagtaa  | atctccggag  | aagaaacatg  | gggatgggtc  | tttgtgtagt  |
| 13921 | aattcgtcta  | taggtagtat  | gtgggtcaaaa | ctaaaaggca  | atgtgctacc  | ttctcttaag  |
| 13981 | cgaaataaca  | aaggacgtgg  | ttcgggtgat  | tcgatatctt  | caagtgtaaag | tgctcctggg  |
| 14041 | ggttctgtac  | ctgaaaaaact | acctgtttct  | gaatcatctt  | cttcattccc  | aggcagaata  |
| 14101 | aaagcaaaaa  | gtaatccacc  | ctcagcgggtg | acttctccta  | cgcatgaagg  | tgtaccagag  |
| 14161 | tggcaacaac  | gtcttaatcc  | tgatcagaga  | gaggaaactac | gcccatttct  | ttctcctgag  |
| 14221 | gagcgaaaga  | agctaaactc  | caactatttc  | ccccctgggg  | aggagtggca  | tttatatttg  |
| 14281 | acgcgtactc  | tttcgggggaa | aaggagagcta | agcagatttc  | tatgtgagag  | tgaagaatca  |
| 14341 | cagttacggc  | gacttgcaga  | agcacaatta  | tcgtcacctg  | ataactctag  | ttctaaaaaa  |
| 14401 | gttgatagag  | atagtgggtt  | ttgttctatg  | ggttctcctg  | ctgtgcaaca  | taagggaagt  |
| 14461 | gtcccttcag  | aggttaaaaga | gtgtgaggta  | gagcctgtat  | cagaggcttt  | gagaaaaata  |
| 14521 | atttaggttt  | ttagatatcc  | acccaagtgt  | tttattaggg  | ttggagccaa  | aatccctgac  |
| 14581 | cctgaaagca  | ctggtgttag  | tttttctcat  | ccattgcaga  | tattgcgcgg  | tactatccac  |

```

14641 ttgatcatca tggcgagcctt ctgggaacat taaaatttcg tactcgaaat cgctgagcca
14701 tactgcttgc tgtggcaaaa aaaaactacc agactctatc accggaacaa ttttgagtga
14761 gtttgtcatt gtgtggaatt atttcgataa tcggtagatc gctatttggc tttagctctt
14821 gtgttaattg ttgaccactc gtttttgctt cgatcaaaaat tgcgtgtggc gtccatcttg
14881 cagctagtga cagaacttgc tctttaagct ttgggtactc aagctttgct cgatatacat
14941 caagtaaata gaatttatta tctatttttg cccaggtggt gcagatgcta aagtcgctgg
15001 aatcgtttgt tgaaactgca gtgtcccagc tttgagttac atgtgagggg ttatcagggg
15061 aattttttata gcgctttaac cactcttggt ttattataacc acttgaaagc ggcaggggggt
15121 tttgttggtg ttgagcagca aaagcgtaac tcccaggttc aactttttatc atctcaactt
15181 cttctcttcc tccctccagg ggatataata actcattctc ttctcttgag tataatactc
15241 ttgcaggtag tgtcattcca gcacttgatg ctggaatcca gtcttttgcg gttgaatttt
15301 ctggatccca gtgtctgggc actgggatga caggaggggg ggttggaatg acaccagtat
15361 ggttattaat tgaataaata acctccttat tttcagaaat cattggcaaa caaatgtgat
15421 gccatatggt ttttggttta gataagaggt gccagtttaa gtcttccagg tggagcctat
15481 gcatcacaag cacaattact ctttttttct atcgttgagt ctcgttacta aagtcgtgatc
15541 gaaccagttt gtggcacggt ttctaaatgt ttcactcaaa gcttgagcag ggtaagcgg
15601 atcatccaca ataataaagt caccaccttc accggttaat gttcctccaa ctgatgttgc
15661 gattctgtat cctctctgca ctgtttgga tttatattta gtgttctgggt ctttggtatg
15721 ttctacctct ggaaatagtt ctttatacca atcagattgc attatgcacc tcgtatcaag
15781 cgaatgtttt tctaactagc acttagaata acttgcaact attattcttg cagttgcccc
15841 gtatccatgc gggccacgca acactcatalc atatggactt cattgaacgc ggaggcatat
15901 tgaatattat gcgccttact tcgccagcat tcgctgcttc cagcctgtct gctatgactt
15961 ttatgtactg ataataatta tactcacatc ccggcactac tgtttgaaag cacagttcaa
16021 tgaatttttag aaaatttata ttatccatat gtgtatttta gaggttgtcc ggaaataagt
16081 aaaaggctat aatatctgaa atttttagtac ggggtaaaga tgagaaaaaa gtatccaaca
16141 gatctaagcg aaagggaatg ggcaagaata gaaaaacact tcagagtatc atacaagaaa
16201 ggaggaaggc cgccaaagta tagcaaaaga gaaatattag aagcaatttt ctatgtattg
16261 cgtacagggt gtcaatggcg gtattttacca aatgattttc cgctatggaa gactgtgtat
16321 gagcagttca ggcaatggaa gaagcaggga atttttgaga aaatgaatta tgaaattaca
16381 aaatatagta gaagaaaaat aggaaggaaat gagcagccga gtgcctgtat agtagatagt
16441 caatctgtaa agactacaga aaagggggga tcaaaggcta tgatggaagt aaaaaagtaa
16501 agggtagaaa aaggcatata attacagaca ctacagggtt tatactagggt tgttacgtag
16561 gcgctgctaa cgaaaaatgat agagatggta ttaaaatagc attaaacaat atgagaacaa
16621 aatatactaa agttaaaaaa atgtgggctg acatgggata ccaaggaaga aatttaaaga
16681 atcacataaa ggaagaatat gacatagata ttgaaattgt taaaaggcct ccatgtagat
16741 tttgggtgca caaagatacg ccacctgagc tactaccaac aagagaacaa ggggttaaag
16801 tacagccaag aagatgggtt gtagaaagga cttttgcttg ggttaatagg aatagaaggc
16861 tatcgaagga gtatgattta ctcaacaat ccactgagaa tttcatatac ctagctatga
16921 gtagggttat gttaaagagg gaatatgctt gaatttacta gtttccggac aacctcatat
16981 agtacttccc aaagtaaatg ataaagggtat aataagctat ttgagttata atggcgtata
17041 gtgtggattt aagggaagg gcagtatcga tgatagaaaa aggggaagtca aagggtgagg
17101 tggcagagct tttggagata ggaatagcaa ctctgtaccg ctggttaaga aagaaagccg
17161 ctggtgaaag cctaaggcca tcgaaaaacg gcagctttat tcgaaaaata gacccaaaaa
17221 tactcgaaaga atatgttaaa aagaatccag atcatacgct ggcagagatg aaacaaaatc
17281 ttggattttg aataaattca atttggtata ggctgaaaca gctaagaatt actttaaaaa
17341 aaagttacac tatatcaaga gcgcaatcaa gaagataggc agcgatttac cgataaaatc
17401 tcaaaaatag accattccag catcttata atagatgaag caggagttga taataggtta
17461 taccgagagt atggacgtgc tccaatagga aagaaaattt atgcagatat tccaggaaga
17521 aaacgagaga gaatcagtat aataggcggg tggattggaa agagatttat tgcaccaatg
17581 actttcaaaag gtgggtgtga caaagaggta ttcaatacat ggtagagaa gatgttatta
17641 cctaaattgc cacatggtac tacaatagtt atggacaatg ccacattcca taaaactccc
17701 aaaacaaagg agttaataga taatgctaga tgccgtttgc tctatctacc aacatattca
17761 ccagattttg accctataga gcattgttgg aataccatca aaagccgct cagaccttta
17821 atgcataaat atacagactt acaacttttg gttggtaata ccataatgga aatttatcat
17881 tcatttttaga aaatactata gtgaatggaa tgtagacttt aatagttttg atttgtcttg
17941 taagattgag gtgttataat gacaggctta caatgctgct aatttagtaa ataacctacg
18001 agtgctattt cttcaacttt atcgaagtaa agaatt

```

//

LOCUS JAQZAU010000040 2750 bp dna linear ENV 17-MAR-2023  
DEFINITION MAG: Wolbachia pipientis isolate wEsol contig\_3091, whole genome

shotgun sequence.

ACCESSION JAQZAU010000040 JAQZAU010000000

VERSION JAQZAU010000040.1

DBLINK BioProject: PRJNA929258  
BioSample: SAMN33142973

KEYWORDS WGS; ENV; Metagenome Assembled Genome; MAG.

SOURCE Wolbachia pipientis (insect metagenome)

ORGANISM Wolbachia pipientis  
Bacteria; Pseudomonadota; Alphaproteobacteria; Rickettsiales;  
Anaplasmataceae; Wolbachieae; Wolbachia.

REFERENCE 1 (bases 1 to 2750)

AUTHORS Fiutek,N., Couger,B.M., Roy,S., de la Torre,J.R. and Connor,E.F.

TITLE Genomic assessment of the contribution of the Wolbachia  
endosymbiont of Eurosta solidaginis to gall-induction

JOURNAL International Journal Molecular Sciences

REFERENCE 2 (bases 1 to 2750)

AUTHORS Fiutek,N., Couger,B.M., Roy,S., de la Torre,J.R. and Connor,E.F.

TITLE Direct Submission

JOURNAL Submitted (10-FEB-2023) Biology, San Francisco State University,  
1600 Holloway Ave, San Francisco, CA 94132, USA

COMMENT ##Genome-Assembly-Data-START##  
Assembly Date :: JUN-2019  
Assembly Method :: FLYE v. 06-2019  
Genome Representation :: Full  
Expected Final Version :: Yes  
Genome Coverage :: 100.0x  
Sequencing Technology :: Illumina HiSeq; PacBio Sequel  
##Genome-Assembly-Data-END##

FEATURES Location/Qualifiers

source 1..2750  
/organism="Wolbachia pipientis"  
/mol\_type="genomic DNA"  
/submitter\_seqid="contig\_3091"  
/isolate="wEsol"  
/isolation\_source="galls on Solidago altissima"  
/host="Eurosta solidaginis MN-2018-EFC"  
/db\_xref="taxon:955"  
/environmental\_sample  
/country="USA: Cowling Arboretum, Carleton College,  
Northfield, MN"  
/lat\_lon="44.48 N 93.13 W"  
/altitude="280 m"  
/collection\_date="2018-11"  
/metagenome\_source="insect metagenome"  
/note="metagenomic"

gene complement(<1..455)  
/locus\_tag="wEsol\_00325"

CDS complement(<1..455)  
/locus\_tag="wEsol\_00325"  
/codon\_start=1  
/transl\_table=11  
/product="hypothetical protein"  
/pfam="Pfam-B\_19525"  
/translation="MKAIFADKGNNSGLVKNVLSGISSEIDLKMAEKAKSGEIEHTSG  
WQVQKEFINNLNEKSLHNLTLQPSLPKGSYFIDSVFSEHYDEIKKVIKECRENHL  
VSNMFDRAEKKANRPSVKSLTRSVSSSFSSLGKRGSEQSNLSKSNLSN"  
/besthit="qcoverage 100 , hcoverage 23.59375 , similarity  
100 , identity 100 , eval 1.21e-89 , alnlength 151 ,  
Bacteria , Proteobacteria , AGK00141.1 hypothetical  
protein wHa\_07010 [Wolbachia endosymbiont of Drosophila

```

simulans wHa]"
gene      complement(541..1098)
          /locus_tag="wEsol_00326"
CDS       complement(541..1098)
          /locus_tag="wEsol_00326"
          /codon_start=1
          /transl_table=11
          /product="hypothetical protein"
          /pfam="Pfam-B_6621"
          /translation="MLHNEKNSNSVGTQQNQPEDSFDLNKTMQNLPNSDIANDPKKLK
ERITDLLKGDTEFSKMKQGDKILVVSAASGLFTAVLPLLAVGATLAIPGAIVGLALYF
AVKVAVKTVQSGYKGLKWSAEKTVDGAKYTAGKVKDASTYAAGKVRDGAHVHKDKVKE
GYEHSVDSLKKGASFVGEVANKVP"
          /besthit="qcoverage 98.9189189189189 , hcoverage
36.094674556213 , similarity 99.5 , identity 99.5 ,
evaluate 1.24e-71 , alnlength 183 , Bacteria ,
Proteobacteria , WP_155969361.1 MULTISPECIES: actin
bundler [Wolbachia]"
gene      1254..1469
          /locus_tag="wEsol_00327"
CDS       1254..1469
          /locus_tag="wEsol_00327"
          /codon_start=1
          /transl_table=11
          /fullproduct="qcoverage 100 , hcoverage 100 , similarity
100 , identity 100 , evaluate 2.45e-41 , alnlength 71 ,
Bacteria , Proteobacteria , WP_006279848.1 MULTISPECIES:
hypothetical protein [Wolbachia]"
          /translation="MKYRKRTLIFLAVITLIIIALLFYNSHFHKDVVHLKSDNKEFK
KKPENSIESTILHREKEVYDHFVHPDD"
          /product="hypothetical protein"
          /besthit="qcoverage 100 , hcoverage 100 , similarity 100
, identity 100 , evaluate 2.45e-41 , alnlength 71 ,
Bacteria , Proteobacteria , WP_006279848.1 MULTISPECIES:
hypothetical protein [Wolbachia]"
gene      1559..2587
          /locus_tag="wEsol_00328"
CDS       1559..2587
          /locus_tag="wEsol_00328"
          /codon_start=1
          /transl_table=11
          /fullproduct="qcoverage 97.6608187134503 , hcoverage
97.0930232558139 , similarity 100 , identity 100 , evaluate
1.43e-227 , alnlength 334 , Bacteria , Proteobacteria ,
WP_010962866.1 MULTISPECIES: FtsH protease activity
modulator HflK [Wolbachia]"
          /cog="HflC COG0330 291 Membrane protease subunits,
stomatin/prohibitin homologs"
          /pfam="Band_7 Pfam-B_5708"
          /tigr="TIGR01933 hflK 261 HflK protein"
          /product="FtsH protease
activity modulator HflK"
          /translation="MIIILGIWGKKPVGNKTPNNEIDILSKAVSDIRFFFLNGLTRNRGK
KPYFIIFIILLFYACTGFYIVHPSEESIETFGKYSNTETPGLRYHFPYPYIGKVFKNV
VKEVNREEIGVSSSYGRDTRGEGVMLTGDENIVNVNFEVQWRVRDAKDYLKVRDYK
PGFSVKNAAESAMREIIGKNTISFALGQGRPEISRDRILLQQILDGYQMGIILSVQ
MKKIDPPEKVISSFRDVQSARADKERTINEAYAYNNDIIPRAKGEAIKIKLDAQAYEN
EVINEAKGNANRFLSLYEEYRQNPSLVKNRIYLETMENIFSKVDKVVVTDLKGMSY
LPLTNLGK"
          /besthit="qcoverage 97.6608187134503 , hcoverage

```

97.0930232558139 , similarity 100 , identity 100 , evaluate 1.43e-227 , alnlength 334 , Bacteria , Proteobacteria , WP\_010962866.1 MULTISPECIES: FtsH protease activity modulator HflK [Wolbachia]"

gene 2590..>2750  
/locus\_tag="wEsol\_00329"

CDS 2590..>2750  
/locus\_tag="wEsol\_00329"  
/codon\_start=1  
/transl\_table=11  
/product="hypothetical protein"  
/tigr="TIGR01932 hflC 318 HflC protein"  
/translation="MSSNIKIVFVSVFVLLIALSNSIFVVQETKQAIIVIQLGKVVRD VRESGLYFK"  
/cog="HflC COG0330 291 Membrane protease subunits, stomatin/prohibitin homologs"  
/besthit="qcoverage 100 , hcoverage 18.2758620689655 , similarity 100 , identity 100 , evaluate 3.82e-21 , alnlength 53 , Bacteria , Proteobacteria , WP\_015589224.1 MULTISPECIES: protease modulator HflC [unclassified Wolbachia]"

# ORIGIN

```

1  gaatttagtg aattgctttt tgacaagctg ttagattggt cagagccttt tcttcccagt
61  gaagagaatg atgatgacac agacctagtt aaacttttga cagaaggcct gttagctttt
121 ttctctgctc tgtcaaacat attgcttacg cttgagtaca aatgattttc tctacattct
181 ttaataacct tcttaatttc atcgtaatgt tcagagaaaa cactgtcgat gaaataacta
241 ctttaggta atgacctttg tgtaacaag ttatgcaagc ttttttcatt taaattatta
301 atgaattctt tctgtacttg ccatccagaa gtatgttcaa tctcccctga ttttgccttc
361 tctgccattt ttaaataaat ttctgacgat attccagaaa gtacattttt cactaaccce
421 gaattatttc ctttatcagc aaaaattgct ttcatatcat ttcttatttc gtcagatttc
481 ttaattgcat ctggagtaaa cttttttacc ttatctaaat agtccgtctc accagatgcc
541 ttatggaact ttatttgcca ctccttcgcc taaaaaacta gcgccttttt tcagtgaatc
601 tactgaatgt tcataacctt ctttcacctt atctttaaca tgcacagcac catctctaac
661 ttttccggca gcgtatgttg atgcgtcctt aactttccca gcagtatatt ttgccccatc
721 aactgttttt tctgctgacc acttgagccc tttatatcca gattgaactg tttttacagc
781 gactttttaca gcgaaatata aagcaagacc aactatagca cctgggtatag caagtgttgc
841 accaactgcc aaaagtggta gtactgccgt aaataatcca cttgctgcac ttactacaag
901 aatcttatct ccttggtttca tcttagagaa ttctgtatcc ctttttaaca ggtcagtaat
961 tctttctttt agcttcttgg gatcattagc aatatctgaa tttggtagat tttgcatcgt
1021 tttattcaaa tcaaaaactat cttctgggtg gttttgttga gttccaacag aatttgaatt
1081 tttttcatta tgtaacattt taaacctcac tattaattaa atatattata attgtattcc
1141 ttgattctta agttagtgtt aaattgattg ccagtattta tttgtcttca aataatttcg
1201 cgtgacgtgt tttgtggtaa catagaaaat taggtcaaga agctgcagca tttatgaagt
1261 atagaaaaag aacactcatc tttttggctg ttataacttt aataataata gctttactat
1321 ttaggtataa ttcccatttt cacaaagacg tagtgcactt aaagagtgac aacaaagaat
1381 tcaaaaaaaaa gccagaaaat tccatagagt cgaccatatt acatagagaa aaggaagtgt
1441 acgatcatgt tttccatcct gatgattaat ttgtaaaata aatagcaatt tatgtttgca
1501 ttttcttatt aaagaagtaa tattagcgta ttaattatag aatcaatcat tatgtttgat
1561 gataataatc cttggaatct ggggaaagaa accggtaggg aacaaaactc ctaataatga
1621 agatatttta agtaaagctg tatctgatat aagggttctt cttaatggat taaccagaaa
1681 caggggcaaa aaaccttatt tcatcatttt cattattttg ctgttctatg cttgcactgg
1741 cttttatatt gtccatccta gtgaagaaag tatagaactt acctttggta aatattctaa
1801 tacggaaaca cctggtttgc gttatcactt cccctaccct attggcaagg tttttaaagt
1861 gaacgttaag gaagtaaatc gtgaagaaat tggggtaagt agttcttatg ggcgagatac
1921 agatcgcggt gaaggcgtga tgctaactgg agatgaaaat atagtcaacg ttaacttcga
1981 ggttcaatgg cgcgtagag atgctaagga ctatttattc aaagtgcggg attacaaacc
2041 cggtttcagt gttaaaaatg ctgctgaaag tgccatgaga gaaataatag gtaaaaacac
2101 gatctctttt gcacttggtc aaggcagacc agaaatttct agagatacta gaattctatt
2161 gcagcagatt cttgatggat accaaatggg tatagagatt ttatctgttc aaatgaaaaa
2221 aattgatcca ccagaaaaag taatcagttc gtttagagat gtacaaagtg ctcgtgcaga

```



```

/codon_start=1
/transl_table=11
/fullproduct="qcoverage 100 , hcoverage 100 , similarity
100 , identity 100 , evalue 1.16e-87 , alnlength 126 ,
Bacteria , Proteobacteria , AOV87106.1 transposase
[Wolbachia endosymbiont of Drosophila incompta]"
/cog="COG3293 COG3293 124 Transposase and inactivated
derivatives"
/pfam="DUF4096"
/product="transposase"
/translation="MRKKYPTDLSEREWARIKHFVRSYKKGGRRPPKYSKREILEAIF
YVLRGTGCQWRYLPNDFPLWKTVYEQFRQWKKQGIFKMNIEITKYSRRKIGRNEQPSA
CIVDSQSVKTTEKGGSKAMMEVKK"
/besthit="qcoverage 100 , hcoverage 100 , similarity 100
, identity 100 , evalue 1.16e-87 , alnlength 126 ,
Bacteria , Proteobacteria , AOV87106.1 transposase
[Wolbachia endosymbiont of Drosophila incompta]"
gene 564..905
/locus_tag="wEsol_00331"
CDS 564..905
/locus_tag="wEsol_00331"
/codon_start=1
/transl_table=11
/fullproduct="qcoverage 100 , hcoverage 100 , similarity
100 , identity 100 , evalue 1.53e-79 , alnlength 113 ,
Bacteria , Proteobacteria , AAS13810.1 transposase, IS5
family, OrfB [Wolbachia endosymbiont of Drosophila
melanogaster]"
/cog="COG3293 COG3293 124 Transposase and inactivated
derivatives"
/pfam="DDE_Tnp_1_2 DDE_Tnp_1"
/product="transposase, IS5 family, OrfB"
/translation="MRTKYTKVKMWADMGYQGRNLKNHIKEEYDIDIEIVKRPPCRF
WVHKDTPPELLPTREQGFKVQPRRWVVERTFAWVNRNRRLSKEYDLLTTSTENFIYLA
MSRVMLKREYA"
/besthit="qcoverage 100 , hcoverage 100 , similarity 100
, identity 100 , evalue 1.53e-79 , alnlength 113 ,
Bacteria , Proteobacteria , AAS13810.1 transposase, IS5
family, OrfB [Wolbachia endosymbiont of Drosophila
melanogaster]"

```

# ORIGIN

```

1  actttgacac taagaggttg tccggaaata agtaaaaggc tataatatct gaaatttttag
61  tacggggtaa agatgagaaa aaagtatcca acagatctaa gcgaaaggga atgggcaaga
121 atagaaaaac acttcagagt atcatacaag aaaggaggaa ggccgccaaa gtatagcaaa
181 agagaaatat tagaagcaat tttctatgta ttgcgtacag ggtgtcaatg gcggtattta
241 ccaaatgatt ttccgctatg gaagactgtg tatgagcagt tcaggcaatg gaagaagcag
301 ggaatttttg agaaaatgaa ttatgaaatt acaaaatata gtagaagaaa aataggaagg
361 aatgagcagc cgagtgcctg tatagtagat agtcaatctg taaagactac agaaaagggg
421 ggatcaaagg ctatgatgga agtaaaaaag taaagggtag aaaaaggcat ataattacag
481 aactcagggt ttttatacta ggttgttacg taggcgctgc taacgaaaat gatagagatg
541 gtattaaaaa agcattaaac aatatgagaa caaaatatac taaagttaaa aaaatgtggg
601 ctgacatggg ataccaagga agaaatttaa agaatacat aaaggaagaa tatgacatag
661 atattgaaat tggttaaaagg cctccatgta gattttgggt gcacaaagat acgccacctg
721 agctactacc aacaagagaa caagggttta aggtacagcc agaagatgg gttgtagaaa
781 ggacttttgc ttgggttaat aggaatagaa ggctatcgaa ggagtatgat ttactcacia
841 catccactga gaatttcata tacctagcta tgagtagggg tatgttaaag agggaatatg
901 cttgaattta ctagtttccg gacaacctct

```

//

```

LOCUS      JAQZAU010000042      2288 bp      dna      linear      ENV 17-MAR-2023
DEFINITION MAG: Wolbachia pipientis isolate wEsol contig_31115, whole genome

```

shotgun sequence.

ACCESSION JAQZAU010000042 JAQZAU010000000

VERSION JAQZAU010000042.1

DBLINK BioProject: PRJNA929258  
BioSample: SAMN33142973

KEYWORDS WGS; ENV; Metagenome Assembled Genome; MAG.

SOURCE Wolbachia pipientis (insect metagenome)

ORGANISM Wolbachia pipientis  
Bacteria; Pseudomonadota; Alphaproteobacteria; Rickettsiales;  
Anaplasmataceae; Wolbachieae; Wolbachia.

REFERENCE 1 (bases 1 to 2288)

AUTHORS Fiutek,N., Couger,B.M., Roy,S., de la Torre,J.R. and Connor,E.F.

TITLE Genomic assessment of the contribution of the Wolbachia  
endosymbiont of Eurosta solidaginis to gall-induction

JOURNAL International Journal Molecular Sciences

REFERENCE 2 (bases 1 to 2288)

AUTHORS Fiutek,N., Couger,B.M., Roy,S., de la Torre,J.R. and Connor,E.F.

TITLE Direct Submission

JOURNAL Submitted (10-FEB-2023) Biology, San Francisco State University,  
1600 Holloway Ave, San Francisco, CA 94132, USA

COMMENT ##Genome-Assembly-Data-START##  
Assembly Date :: JUN-2019  
Assembly Method :: FLYE v. 06-2019  
Genome Representation :: Full  
Expected Final Version :: Yes  
Genome Coverage :: 100.0x  
Sequencing Technology :: Illumina HiSeq; PacBio Sequel  
##Genome-Assembly-Data-END##

FEATURES Location/Qualifiers

source 1..2288  
/organism="Wolbachia pipientis"  
/mol\_type="genomic DNA"  
/submitter\_seqid="contig\_31115"  
/isolate="wEsol"  
/isolation\_source="galls on Solidago altissima"  
/host="Eurosta solidaginis MN-2018-EFC"  
/db\_xref="taxon:955"  
/environmental\_sample  
/country="USA: Cowling Arboretum, Carleton College,  
Northfield, MN"  
/lat\_lon="44.48 N 93.13 W"  
/altitude="280 m"  
/collection\_date="2018-11"  
/metagenome\_source="insect metagenome"  
/note="metagenomic"

gene 215..445  
/locus\_tag="wEsol\_00332"

CDS 215..445  
/locus\_tag="wEsol\_00332"  
/codon\_start=1  
/transl\_table=11  
/product="hypothetical protein"  
/pfam="DEDD\_Tnp\_IS110 Pfam-B\_8792"  
/translation="MVTSYQNFIGIDIGKFKNVVAIHKQKNAVEFDNNASGWQQLFQE  
FSDIVFSKMNDKFPLWYYQPKVVSLYIYALKV"  
/besthit="qcoverage 64.4736842105263 , hcoverage  
59.0361445783133 , similarity 100 , identity 98.0 ,  
evaluate 7.61e-26 , alnlength 49 , Bacteria ,  
Proteobacteria , WP\_213863621.1 transposase, partial  
[Wolbachia endosymbiont of Ceratitis capitata]"

gene complement(366..677)  
/locus\_tag="wEsol\_00333"

CDS complement(366..677)  
/locus\_tag="wEsol\_00333"  
/codon\_start=1  
/transl\_table=11  
/fullproduct="qcoverage 100 , hcoverage 100 , similarity 100 , identity 100 , evalue 1.60e-74 , alnlength 103 , Bacteria , Proteobacteria , WP\_155968470.1 transposase [Wolbachia pipientis]"  
/cog="COG3335 COG3335 132 Transposase and inactivated derivatives"  
/pfam="DDE\_3 DDE\_1"  
/product="transposase"  
/translation="MTFKGGCDKEVFNTWLEKMLLPKLPHGTTIVMDNATFHKTPKTK ELIDNARCRLLYLPTYSPDLNPIEHCWNTIKSRLRPLMHKYTDLQLLVGNTIMEIYHS F"  
/besthit="qcoverage 100 , hcoverage 100 , similarity 100 , identity 100 , evalue 1.60e-74 , alnlength 103 , Bacteria , Proteobacteria , WP\_155968470.1 transposase [Wolbachia pipientis]"

gene complement(1117..1224)  
/locus\_tag="wEsol\_00334"

CDS complement(1117..1224)  
/locus\_tag="wEsol\_00334"  
/codon\_start=1  
/transl\_table=11  
/product="hypothetical protein"  
/pfam="HTH\_Tnp\_IS630"  
/translation="MAYSVDLRERAVSMIEKGKSKVEVAELLEIGIATL"  
/besthit="qcoverage 100 , hcoverage 52.2388059701493 , similarity 100 , identity 100 , evalue 3.26e-13 , alnlength 35 , Bacteria , Proteobacteria , WP\_213863574.1 IS630 transposase-related protein, partial [Wolbachia endosymbiont of Ceratitidis capitata]"

gene 1554..2075  
/locus\_tag="wEsol\_00335"

CDS 1554..2075  
/locus\_tag="wEsol\_00335"  
/codon\_start=1  
/transl\_table=11  
/fullproduct="qcoverage 100 , hcoverage 100 , similarity 100 , identity 100 , evalue 4.69e-112 , alnlength 173 , Bacteria , Proteobacteria , RLT59977.1 transposase IS116/IS110/IS902 family protein [Wolbachia endosymbiont of Drosophila ananassae]"  
/cog="COG3547 COG3547 303 Transposase and inactivated derivatives"  
/pfam="Transposase\_20"  
/product="transposase IS116/IS110/IS902 family protein"  
/translation="MRTQEKCRLEAPENDHIKESCQKTIEFFDSQINELNDTIQKIID ESRELQQRQKILKTVPGIGKKLSQDFLCIMPELGYLNRKEVASLAGVAPHPKESGKAV GYRRITGGRSNVRSKLFTAAMAATRSKSILGAFYSKLVESGKKKMVAITALMRKIIVI ANTRLKEAINLHT"  
/besthit="qcoverage 100 , hcoverage 100 , similarity 100 , identity 100 , evalue 4.69e-112 , alnlength 173 , Bacteria , Proteobacteria , RLT59977.1 transposase IS116/IS110/IS902 family protein [Wolbachia endosymbiont of Drosophila ananassae]"

# ORIGIN

```

1  tgtaagttaa aaacgtgata taaaagagat aagagagaaa gataaccctg ctactagga
61 atagcgggcg tgcgcgaccg aaaggaaatt ggtattacaa ccgttggtat caaggtagcg
121 tagccctatc tctcgatacg tttgaatagt tgcttgggac atatatatgc acccgtttac
181 aatctttaat taactaaaac tatcgagggtt tattatgggtt acatctttat aaaattttat
241 tggcattgac atcggaaaat ttaaaaatgt cgttgcaatt cacaaacaga agaatgctgt
301 cgaatttgat aataatgctt ctgggtggca acaattattt caagagtttt cagatatagt
361 attttctaaa atgaatgata aattttccatt atgggtattac caaccaaag ttgtaagtct
421 gtatatttat gcattaaagg tctgaggcgg cttttgatgg tattccaaca atgctctata
481 gggttcaaat ctggtgaata tggttgtaga tagagcaaac ggcattctagc attatctatt
541 aactcctttg ttttgggagt tttatggaat gtggcattgt ccataactat tgtagtacca
601 tgtggcaatt taggtaataa catcttctct aaccatgtat tgaatacctc tttgtcacac
661 ccacctttga aagtcattgg tgcaataaat ctctttccaa tccaccgcc tattatactg
721 attctctctc gttttcttcc tggaatatct gcataaattt tctttcctat tggagcacgt
781 ccatactctc ggtataacct attatcaact cctgcttcat ctatatataa gatgctggaa
841 tgggtctattt ttgagatttt atcggtaaat cgctgcctat cttcttgatt gcgctcttga
901 tatagtgtaa ctttttttta aagtaattct tagctgtttc agcctatacc aaattgaatt
961 tattccaaat ccaagatttt gtttcatctc tgccagcgta tgatctggat tctttttaac
1021 atattcttcg agtatttttg ggtctatttt tccaataaag ctgccgtttt tcatggtcct
1081 taggctttca ccagcggtt tctttcttaa ccagcgctac agagttgcta ttcctatctc
1141 caaaagctct gccacctcaa cctttgactt ccctttttct atcatcgata ctgccctttc
1201 ccttaaattc acactatacg ccattataac tcaaatagct tattatacct ttatcattta
1261 ctttgggaag tactatattc tacctaattg ttagtgact ttagaaaata cagggaata
1321 tgagcttggc ttatcacatt ttcttaccga caaaaatatt gccgtgcatc gagctaatac
1381 tcgtaaagta aaaagcttta ttttatctca cggaacttta gcaaagtcta gatgcaagag
1441 ctcttgctca atatggattt gaacgccata gaactatctc tctatttgta cctacctcta
1501 cagaacaatc aactttggct gcactttgtc aacgtcgtga tgatattacg caaatgagaa
1561 ctcaagaaaa atgcagactt gaagcaccgg aaaatgatca tataaaagaa agctgtcaaa
1621 agaccattga gtttttcgat agtcaaataa acgaactcaa tgatactata caaaagatta
1681 ttgatgaaag ccgcgaatta caacaacgcc aaaaaattct taaaacagtt cctggaatag
1741 gtaaaaagtt atcacaagat tttttgtgtt taatgccaga gcttggttac ttaaacagaa
1801 aagaagtagc aagtcttgcc ggagttgcac cgcatccaaa agaaagtggg aaagctgttg
1861 gttaccgaag gattacaggt ggtagaagta acgttcgttc aaagctcttt acagccgcta
1921 tggctgctac aaggctgaaa tctatacttg gcgcctttta ttctaagctt gttgaaagtg
1981 gtaagaagaa gatggtggct ataacagccc taatgcgtaa aattatagta attgctaata
2041 caagacttaa agaagcaatt aatttgcata cttaaaaatc ttcacaacgg taactgaaat
2101 tggctaataa atatgtgcgt ccacacagac ttaaaagcaca tattcattag cttaaagcaga
2161 aattgctgtg gtagctgttt gatataaaat tctattttcta tgacaaacgg gtttttattg
2221 cccatataat ttgcaaaatt acacaaataa aaaaattttt aaaaaacata gttgatagca
2281 ctgacaga

```

```

//
LOCUS      JAQZAU010000043                1692 bp    dna        linear    ENV 17-MAR-2023
DEFINITION MAG: Wolbachia pipientis isolate wEsol contig_31598, whole genome
            shotgun sequence.
ACCESSION  JAQZAU010000043 JAQZAU010000000
VERSION    JAQZAU010000043.1
DBLINK     BioProject: PRJNA929258
            BioSample: SAMN33142973
KEYWORDS   WGS; ENV; Metagenome Assembled Genome; MAG.
SOURCE     Wolbachia pipientis (insect metagenome)
ORGANISM   Wolbachia pipientis
            Bacteria; Pseudomonadota; Alphaproteobacteria; Rickettsiales;
            Anaplasmataceae; Wolbachieae; Wolbachia.
REFERENCE  1 (bases 1 to 1692)
AUTHORS    Fiutek,N., Couger,B.M., Roy,S., de la Torre,J.R. and Connor,E.F.
TITLE      Genomic assessment of the contribution of the Wolbachia
            endosymbiont of Eurosta solidaginis to gall-induction
JOURNAL    International Journal Molecular Sciences
REFERENCE  2 (bases 1 to 1692)
AUTHORS    Fiutek,N., Couger,B.M., Roy,S., de la Torre,J.R. and Connor,E.F.

```

TITLE Direct Submission  
 JOURNAL Submitted (10-FEB-2023) Biology, San Francisco State University,  
 1600 Holloway Ave, San Francisco, CA 94132, USA  
 COMMENT ##Genome-Assembly-Data-START##  
 Assembly Date :: JUN-2019  
 Assembly Method :: FLYE v. 06-2019  
 Genome Representation :: Full  
 Expected Final Version :: Yes  
 Genome Coverage :: 100.0x  
 Sequencing Technology :: Illumina HiSeq; PacBio Sequel  
 ##Genome-Assembly-Data-END##  
 FEATURES Location/Qualifiers  
     source 1..1692  
         /organism="Wolbachia pipientis"  
         /mol\_type="genomic DNA"  
         /submitter\_seqid="contig\_31598"  
         /isolate="wEsol"  
         /isolation\_source="galls on Solidago altissima"  
         /host="Eurosta solidaginis MN-2018-EFC"  
         /db\_xref="taxon:955"  
         /environmental\_sample  
         /country="USA: Cowling Arboretum, Carleton College,  
         Northfield, MN"  
         /lat\_lon="44.48 N 93.13 W"  
         /altitude="280 m"  
         /collection\_date="2018-11"  
         /metagenome\_source="insect metagenome"  
         /note="metagenomic"  
     gene <1..128  
         /locus\_tag="wEsol\_00336"  
     CDS <1..128  
         /locus\_tag="wEsol\_00336"  
         /codon\_start=1  
         /transl\_table=11  
         /product="hypothetical protein"  
         /pfam="DEDD\_Tnp\_IS110"  
         /translation="KTDKSDAAMIARFCIANKPALWKPIAPEMRHLRALHAIKR"  
         /besthit="qcoverage 87.8048780487805 , hcoverage  
         29.7520661157025 , similarity 97.2 , identity 94.4 ,  
         evaluate 1.07e-15 , alnlength 36 , Bacteria ,  
         Proteobacteria , WP\_110410155.1 transposase [Wolbachia  
         endosymbiont of Folsomia candida]"  
     gene 109..435  
         /locus\_tag="wEsol\_00337"  
     CDS 109..435  
         /locus\_tag="wEsol\_00337"  
         /codon\_start=1  
         /transl\_table=11  
         /pfam="Transposase\_20"  
         /fullproduct="qcoverage 100 , hcoverage 100 , similarity  
         100 , identity 100 , evaluate 2.83e-66 , alnlength 108 ,  
         Bacteria , Proteobacteria , WP\_007549647.1 MULTISPECIES:  
         transposase [Wolbachia]"  
         /translation="MQSLKDDKVQQTNRLNKNMHSSCKEAIISKVILAIIEEQIIVLEK  
         EINEHINNYPHLKNMVENLKTIKGIGYLTAVAVVAEMPSVDNFDNAKQFTAFAARTLS  
         IGIVSK"  
         /product="transposase"  
         /besthit="qcoverage 100 , hcoverage 100 , similarity 100  
         , identity 100 , evaluate 2.83e-66 , alnlength 108 ,  
         Bacteria , Proteobacteria , WP\_007549647.1 MULTISPECIES:

```

gene      transposase [Wolbachia]"
          374..664
          /locus_tag="wEsol_00338"
CDS       374..664
          /locus_tag="wEsol_00338"
          /codon_start=1
          /transl_table=11
          /pfam="Transposase_20"
          /fullproduct="qcoverage 100 , hcoverage 100 , similarity
          100 , identity 100 , evalue 2.78e-65 , alnlength 96 ,
          Bacteria , Proteobacteria , WP_081600779.1 MULTISPECIES:
          transposase [Wolbachia]"
          /translation="MLNNLQLLLPGHYQSGSSVSKRSCICKIGSERIRKALYMPAIVV
          KNHNNHFQKFCQRLASKGKCPKVIVLALMRKLMHVFFGILKKNQPFNCNFVG"
          /product="transposase"
          /besthit="qcoverage 100 , hcoverage 100 , similarity 100
          , identity 100 , evalue 2.78e-65 , alnlength 96 ,
          Bacteria , Proteobacteria , WP_081600779.1 MULTISPECIES:
          transposase [Wolbachia]"
gene      complement(878..>1692)
          /locus_tag="wEsol_00339"
CDS       complement(878..>1692)
          /locus_tag="wEsol_00339"
          /codon_start=1
          /transl_table=11
          /product="hypothetical protein"
          /pfam="AA_permease_2 AA_permease"
          /tigr="TIGR00905 2A0302 473 transporter, basic amino
          acid/polyamine antiporter (APA) family"
          /translation="VLLVIPIAALFFFDNRNNFIISEEISNLTTSQILARSTLITLWGF
          IGVELATAPAGSVDNPARTIPRAVVLGTISVAVAYFINNLAIMGLINGNDLASSRAPY
          VDAIKIMASGNWHLIISITAFIFCVGTLNAWVLASGQVALGLAKDKLMPQFFAQRNKH
          GSPFWGITISSVGTSLVLLILTSSNNFAKQITSIIDFSVVSFLFVYLACSLAFLKVIVQ
          EKSCYKFLIGSIATTFCCWVIFETSVENTLLIASLFTASGVPLYLFWYRRVSV"
          /cog="PotE COG0531 466 Amino acid transporters"
          /besthit="qcoverage 100 , hcoverage 63.6792452830189 ,
          similarity 99.6 , identity 99.6 , evalue 1.16e-180 ,
          alnlength 270 , Bacteria , Proteobacteria ,
          WP_141456681.1 MULTISPECIES: amino acid permease
          [unclassified Wolbachia]"

```

#### ORIGIN

```

1  ataagacaga taaatcagat gcagctatga tagctagatt ttgtatcgcc aacaaacctg
61 ctcttttgaa gccatttgca cctgaaatga ggcatttgag ggcgttgcat gcaatcgcta
121 aaagatgata aggtgcaaca gacaaatcgc ttggaaaaca aaaatatgca ttccagttgc
181 aaagaagcta tatctaaagt aatttttgga atagaggagc aaattattgt tctcgaaaaa
241 gaaattaatg agcatataaa taactatcca catctaaaaa atatggtgga aaaccttaag
301 actataaaag gtataggata tcttactgct gttgctgttg tcgcagaaat gccatcagtt
361 gataactttg acaatgctaa acaatttaca gcttttgctg ccaggacatt atcaatcggg
421 atcgctcagta agtaagagaa gttgcatatg caaaatagga tctgagcgta ttcgaaaagc
481 tctttatatg ccagctatag tagtcaaaaa ccataataat cattttcaaa agttttgtca
541 gcgtctagca agtaaaggca aatgtccaaa agtcatagtt cttgcgttaa tgcgaaaatt
601 aatgcatgtc ttttttggtg ttcttaaaaa gaatcaacca tttaattgta attttggttg
661 ataatttggt tgacagcaga gacagtatct gggatccaga ttgggcaact agttggtaaa
721 cacgaaagcg attaatcctt tacaacgttt ttgatggaac tgcgcgaaag aactggatgc
781 cagtgtcacg cactggcatg acacccatth cttcctatag ttgtcttttc tcgcttacct
841 tattttgcca ctctgctgaa cagatacata acatttgcta tacagaaact ctgcgatacc
901 aaaataaata aagaggtagc ccacttgtag tgaataagct tgcgatcagc aaggatttca
961 cagaagtttc aaatattacc cagcagcaaa aggttggtgc tatactgcca attaaaaatt
1021 tgtaacaact cttttcttgc acaataactt tgagaaaagc aagactgcat gcaaggtaaa
1081 caaataaaaa tgaaactaca gaaaagtcga taattgatgt gatctgctta gcaaaaattgt

```



CDS complement(<1..105)  
 /locus\_tag="wEsol\_00340"  
 /codon\_start=1  
 /transl\_table=11  
 /product="hypothetical protein"  
 /translation="MLEFTSFRTTSNAQSSRLDGESYQYTTTRDYMTIYF"  
 /besthit="qcoverage 100 , hcoverage 25.1798561151079 ,  
 similarity 100 , identity 100 , evalue 1.03e-14 ,  
 alnlength 35 , Bacteria , Proteobacteria , WP\_155969321.1  
 MULTISPECIES: hypothetical protein [Wolbachia]"

gene complement(98..439)  
 /locus\_tag="wEsol\_00341"

CDS complement(98..439)  
 /locus\_tag="wEsol\_00341"  
 /codon\_start=1  
 /transl\_table=11  
 /fullproduct="qcoverage 100 , hcoverage 100 , similarity  
 100 , identity 100 , evalue 1.53e-79 , alnlength 113 ,  
 Bacteria , Proteobacteria , AAS13810.1 transposase, IS5  
 family, OrfB [Wolbachia endosymbiont of Drosophila  
 melanogaster]"  
 /cog="COG3293 COG3293 124 Transposase and inactivated  
 derivatives"  
 /pfam="DDE\_Tnp\_1\_2 DDE\_Tnp\_1"  
 /product="transposase, IS5 family, OrfB"  
 /translation="MRTKYTKVKMWADMGYQGRNLKNHIKEEYDIDIEIVKRPPCRF  
 WVHKDTPPELLPTREQGFKVQPRRWVVERTFAWVNRNRRLSKEYDLLTTSTENFIYLA  
 MSRVMLKREYA"  
 /besthit="qcoverage 100 , hcoverage 100 , similarity 100  
 , identity 100 , evalue 1.53e-79 , alnlength 113 ,  
 Bacteria , Proteobacteria , AAS13810.1 transposase, IS5  
 family, OrfB [Wolbachia endosymbiont of Drosophila  
 melanogaster]"

gene complement(550..930)  
 /locus\_tag="wEsol\_00342"

CDS complement(550..930)  
 /locus\_tag="wEsol\_00342"  
 /codon\_start=1  
 /transl\_table=11  
 /fullproduct="qcoverage 100 , hcoverage 100 , similarity  
 100 , identity 100 , evalue 1.16e-87 , alnlength 126 ,  
 Bacteria , Proteobacteria , AOV87106.1 transposase  
 [Wolbachia endosymbiont of Drosophila incompta]"  
 /cog="COG3293 COG3293 124 Transposase and inactivated  
 derivatives"  
 /pfam="DUF4096"  
 /product="transposase"  
 /translation="MRKKYPTDLSEREWARIKHFVRSYKKGGRPPKYSKREILEAIF  
 YVLRGTGCQWRYLPNDFPLWKTVYEQFRQWKKQGIFEKMNIEITKYSRRKIGRNEQPSA  
 CIVDSQSVKTTTEKGGSKAMMEVKK"  
 /besthit="qcoverage 100 , hcoverage 100 , similarity 100  
 , identity 100 , evalue 1.16e-87 , alnlength 126 ,  
 Bacteria , Proteobacteria , AOV87106.1 transposase  
 [Wolbachia endosymbiont of Drosophila incompta]"

# ORIGIN

```

1 aaagtaaatt gtcatatagt ctcttgtggt gtattgataa ctttctccat ctagtctgct
61 actttgtgcg ttagagggtt tccggaaact agtaaattca agcatattcc ctctttaaca
121 taaccctact catagctagg tatatgaaat tctcagtgga tgttgtgagt aaatcatact
181 ccttcgatag ccttctattc ctattaaccc aagcaaaagt ctttctaca acccatcttc
241 ttggctgtac tttaaaccct tgttctcttg ttggtagtag ctcaggtggc gtatctttgt

```

```

301 gcacccaaaa tctacatgga ggccttttaa caatttcaat atctatgtca tattcttcct
361 ttatgtgatt ctttaaattt cttccttggt atcccatgtc agccacatt tttttaactt
421 tagtatattt tgttctcata ttgtttaatg ctattttaat accatctcta tcattttcgt
481 tagcagcgcc tacgtaacaa cctagtataa aaccctgagt gtctgtaatt atatgccttt
541 ttctaccctt tactttttta cttccatcat agcctttgat cccccctttt ctgtagtctt
601 tacagattga ctatctacta tacaggcact cggctgctca ttccttccta tttttcttct
661 actatatttt gtaatttcat aattcatttt ctcaaaaatt ccctgcttct tccattgcct
721 gaactgctca tacacagtct tccatagcgg aaaatcattt ggtaaatacc gccattgaca
781 ccctgtacgc aatacataga aaattgcttc taatatattt cttttgctat actttggcgg
841 ccttcctcct ttcttgatg atactctgaa gtgtttttct attcttgccc attcccttct
901 gcttagatct gttggatact tttttctcat ctttaccctg tactaaaatt tcagatatta
961 tagcctttta cttattttccg gacaacctc

```

//

```

LOCUS      JAQZAU010000045          37288 bp    dna        linear    ENV 17-MAR-2023
DEFINITION MAG: Wolbachia pipientis isolate wEsol contig_32067, whole genome
            shotgun sequence.
ACCESSION  JAQZAU010000045  JAQZAU010000000
VERSION    JAQZAU010000045.1
DBLINK     BioProject: PRJNA929258
            BioSample: SAMN33142973
KEYWORDS   WGS; ENV; Metagenome Assembled Genome; MAG.
SOURCE     Wolbachia pipientis (insect metagenome)
ORGANISM   Wolbachia pipientis
            Bacteria; Pseudomonadota; Alphaproteobacteria; Rickettsiales;
            Anaplasmataceae; Wolbachieae; Wolbachia.
REFERENCE  1  (bases 1 to 37288)
AUTHORS    Fiutek,N., Couger,B.M., Roy,S., de la Torre,J.R. and Connor,E.F.
TITLE      Genomic assessment of the contribution of the Wolbachia
            endosymbiont of Eurosta solidaginis to gall-induction
JOURNAL    International Journal Molecular Sciences
REFERENCE  2  (bases 1 to 37288)
AUTHORS    Fiutek,N., Couger,B.M., Roy,S., de la Torre,J.R. and Connor,E.F.
TITLE      Direct Submission
JOURNAL    Submitted (10-FEB-2023) Biology, San Francisco State University,
            1600 Holloway Ave, San Francisco, CA 94132, USA
COMMENT    ##Genome-Assembly-Data-START##
            Assembly Date      :: JUN-2019
            Assembly Method    :: FLYE v. 06-2019
            Genome Representation :: Full
            Expected Final Version :: Yes
            Genome Coverage     :: 100.0x
            Sequencing Technology :: Illumina HiSeq; PacBio Sequel
            ##Genome-Assembly-Data-END##
FEATURES   Location/Qualifiers
            source              1..37288
                                 /organism="Wolbachia pipientis"
                                 /mol_type="genomic DNA"
                                 /submitter_seqid="contig_32067"
                                 /isolate="wEsol"
                                 /isolation_source="galls on Solidago altissima"
                                 /host="Eurosta solidaginis MN-2018-EFC"
                                 /db_xref="taxon:955"
                                 /environmental_sample
                                 /country="USA: Cowling Arboretum, Carleton College,
                                 Northfield, MN"
                                 /lat_lon="44.48 N 93.13 W"
                                 /altitude="280 m"
                                 /collection_date="2018-11"
                                 /metagenome_source="insect metagenome"
                                 /note="metagenomic"

```

```

gene      73..354
          /locus_tag="wEsol_00343"
CDS       73..354
          /locus_tag="wEsol_00343"
          /codon_start=1
          /transl_table=11
          /fullproduct="qcoverage 100 , hcoverage 100 , similarity
98.9 , identity 98.9 , evalue 1.51e-63 , alnlength 93 ,
Bacteria , Proteobacteria , CDR78524.1 hypothetical
protein WPAU_0128 [Wolbachia endosymbiont of Drosophila
simulans wAu]"
          /translation="MLRWHIEECYKRLKVGAELENFSGEAVLQEFWANLVMCNILSLH
MCDAQGPWNPDQITEYRLNFSVLFGVMRQKLYQVLIAPKNFQALFKYTR"
          /product="hypothetical protein"
          /besthit="qcoverage 100 , hcoverage 100 , similarity 98.9
, identity 98.9 , evalue 1.51e-63 , alnlength 93 ,
Bacteria , Proteobacteria , CDR78524.1 hypothetical
protein WPAU_0128 [Wolbachia endosymbiont of Drosophila
simulans wAu]"
gene      complement(441..650)
          /locus_tag="wEsol_00344"
CDS       complement(441..650)
          /locus_tag="wEsol_00344"
          /codon_start=1
          /transl_table=11
          /fullproduct="qcoverage 100 , hcoverage 100 , similarity
100 , identity 100 , evalue 8.37e-39 , alnlength 69 ,
Bacteria , Proteobacteria , WP_015589377.1 MULTISPECIES:
hypothetical protein [Wolbachia]"
          /translation="MLVSEQIESVDREELKQQNHIHKDTECSEETTIYGHINQHMEKN
ISNTLHEIYDALMSYNESEQSMTST"
          /product="hypothetical protein"
          /besthit="qcoverage 100 , hcoverage 100 , similarity 100
, identity 100 , evalue 8.37e-39 , alnlength 69 ,
Bacteria , Proteobacteria , WP_015589377.1 MULTISPECIES:
hypothetical protein [Wolbachia]"
gene      782..2107
          /locus_tag="wEsol_00345"
CDS       782..2107
          /locus_tag="wEsol_00345"
          /codon_start=1
          /transl_table=11
          /fullproduct="qcoverage 100 , hcoverage 100 , similarity
100 , identity 100 , evalue 3.68e-315 , alnlength 441 ,
Bacteria , Proteobacteria , WP_010963041.1 MULTISPECIES:
ribosome biogenesis GTPase Der [Wolbachia]"
          /cog="COG1160 COG1160 444 Predicted GTPases"
          /pfam="Arf MMR_HSR1 FeoB_N Miro AIG1 Ras AAA_17 Gtr1 RagA
Dynamin_N SRPRB AAA_33 Pfam-B_6479 DUF258 GTP_EFTU AIG1
Septin Pfam-B_3369 MMR_HSR1 FeoB_N Miro SRPRB Dynamin_N
Ras AAA_18 Pfam-B_9457"
          /tigr="TIGR03594 GTPase_EngA 432 ribosome-associated
GTPase EngA"
          /product="ribosome
biogenesis GTPase Der"
          /translation="MLKIAIVGLPNAGKSTLFNRLVGRKAAVVSNI PGVTRDRREGMG
RISDLEFKVIDTGGWNDQTNFSLQVIEQIEFSLSNSNI IFFLVDAKVQNERNEEFAKW
LKRKINKPVILVANKCESHKSENVVDYLQFFDFLGVPVYISAEHNLGMVDLYDALAGVIE
NFNENTELPNNELSRRLRIATIGRPNVGKSTFLNGLLAENRLITSSEPGTTRDSVDITY
DHDGELITLIDTAGIRRRKANVVDGLSRFVEKSMESIKRSHVVVLM LDSL VGIEQQDL

```

```

SIGEAAIKGGKGIIVLNKWDLIGKDDRSRLIKFVKQQEVTRLFLEVPTITISALKGM
RCGDVIDKCLEVSESLNKKISTAKLNKWLIDAVGKHSHPVKGKAVKMKYIAQIGTKP
PAFSLICNIPESVDESYKRYLINDLRKNFFADGVPVRLLLKKNKNPYVK"
/besthit="qcoverage 100 , hcoverage 100 , similarity 100
, identity 100 , evalue 3.68e-315 , alnlength 441 ,
Bacteria , Proteobacteria , WP_010963041.1 MULTISPECIES:
ribosome biogenesis GTPase Der [Wolbachia]"
gene 2104..2625
/locus_tag="wEsol_00346"
CDS 2104..2625
/locus_tag="wEsol_00346"
/codon_start=1
/transl_table=11
/fullproduct="qcoverage 100 , hcoverage 100 , similarity
100 , identity 100 , evalue 6.45e-119 , alnlength 173 ,
Bacteria , Proteobacteria , WP_015589379.1 MULTISPECIES:
disulfide bond formation protein B [Wolbachia]"
/cog="DsbB COG1495 170 Disulfide bond formation protein
DsbB"
/pfam="DsbB"
/product="disulfide bond
formation protein B"
/translation="MNTLLYTFRDNLKVMCNNSRIPAIFLLSSAAALIFAYVLEYFF
NMLPCKLCTYERIVYYIAGLLAVACMLKDNKILYAMFCSYLIGAVISFYHIGLELHL
FHDVLGCTEQASGNVSIEELRNLLNPNYSPSCDRPHYVLGVSLATWNLIYLIVALFV
SGKVYCGERKKSK"
/besthit="qcoverage 100 , hcoverage 100 , similarity 100
, identity 100 , evalue 6.45e-119 , alnlength 173 ,
Bacteria , Proteobacteria , WP_015589379.1 MULTISPECIES:
disulfide bond formation protein B [Wolbachia]"
gene 2600..3142
/locus_tag="wEsol_00347"
CDS 2600..3142
/locus_tag="wEsol_00347"
/codon_start=1
/transl_table=11
/fullproduct="qcoverage 100 , hcoverage 100 , similarity
100 , identity 99.4 , evalue 3.15e-118 , alnlength 180 ,
Bacteria;Viruses , Proteobacteria;Uroviricota ,
WP_006279362.1 MULTISPECIES: demethoxyubiquinone
hydroxylase family protein [Wolbachia]"
/cog="CAT5 COG2941 204 Ubiquinone biosynthesis protein
COQ7"
/pfam="COQ7"
/product="
demethoxyubiquinone hydroxylase family protein"
/translation="MEKERNLNNLRYSNNQFLQQAIRVDHAGEYGAICIYSGQKFILK
KSSIINEIEMEEQEKKHFHYFNEKIKEQKVRPTVLLPVWRVLGVSLGVATAIMGKEA
AMACTAAVEEVIGEHYKEQVSHLEDGELRETISKFRDEELEHKDIAIQHNAESAFGYN
ILSSFIKTGCKTAIYLSKLI"
/besthit="qcoverage 100 , hcoverage 100 , similarity 100
, identity 99.4 , evalue 3.15e-118 , alnlength 180 ,
Bacteria;Viruses , Proteobacteria;Uroviricota ,
WP_006279362.1 MULTISPECIES: demethoxyubiquinone
hydroxylase family protein [Wolbachia]"
gene complement(3641..4276)
/locus_tag="wEsol_00348"
CDS complement(3641..4276)
/locus_tag="wEsol_00348"
/codon_start=1

```

```

/transl_table=11
/pfam="DDE_Tnp_1_rve_DDE_Tnp_1_2"
/fullproduct="qcoverage 100 , hcoverage 100 , similarity
100 , identity 100 , evalue 2.85e-152 , alnlength 211 ,
Bacteria , Proteobacteria , WP_081600764.1 MULTISPECIES:
transposase [unclassified Wolbachia]"
/translation="MIAENNMEDIEIAIDSTGISIYNNTPGHSKENSTDRKYRGYEQT
RKLHVMLNINNKKAIYVKSNGVYSDHYGACDLLKEVDFQHAIKALYADRACDRHKFY
KLCNEYDIKTKIPPINNAAEHPEIDYMSDRNAAIRLIKLYGEDGMKEWKKEVNYGKRS
YIEGFFSRLKQIFGFSFRNKSEINREKELLIKCYLLNKFTDIGMAKFEIVT"
/product="transposase"
/besthit="qcoverage 100 , hcoverage 100 , similarity 100
, identity 100 , evalue 2.85e-152 , alnlength 211 ,
Bacteria , Proteobacteria , WP_081600764.1 MULTISPECIES:
transposase [unclassified Wolbachia]"
gene complement(4260..4589)
/locus_tag="wEsol_00349"
CDS complement(4260..4589)
/locus_tag="wEsol_00349"
/codon_start=1
/transl_table=11
/pfam="DDE_Tnp_1_5"
/fullproduct="qcoverage 100 , hcoverage 100 , similarity
100 , identity 100 , evalue 4.31e-75 , alnlength 109 ,
Bacteria , Proteobacteria , WP_141456678.1 MULTISPECIES:
transposase [unclassified Wolbachia]"
/translation="MPQKMRVSNCHYEYKFLQERGSIFCYINDAIENWYENCPKMQGG
NYIYSDKVVILVHIIVSFFRIGLRQTVGFIKGYLQQIGRDLAVISYSQASRRFKKLN
KINDCRK"
/product="transposase"
/besthit="qcoverage 100 , hcoverage 100 , similarity 100
, identity 100 , evalue 4.31e-75 , alnlength 109 ,
Bacteria , Proteobacteria , WP_141456678.1 MULTISPECIES:
transposase [unclassified Wolbachia]"
gene 4813..5703
/locus_tag="wEsol_00350"
CDS 4813..5703
/locus_tag="wEsol_00350"
/codon_start=1
/transl_table=11
/fullproduct="qcoverage 96.9594594594595 , hcoverage
88.0368098159509 , similarity 100 , identity 100 , evalue
7.13e-191 , alnlength 287 , Bacteria , Proteobacteria ,
WP_007548592.1 MULTISPECIES:
phospho-N-acetylmuramoyl-pentapeptide-transferase
[Wolbachia]"
/cog="Rfe COG0472 319 UDP-N-acetylmuramyl pentapeptide
phosphotransferase/UDP-N- acetylglucosamine-1-phosphate
transferase"
/pfam="Glycos_transf_4 Pfam-B_8659"
/tigr="TIGR00445 mraY 321
phospho-N-acetylmuramoyl-pentapeptide-transferase"
/product="
phospho-N-acetylmuramoyl-pentapeptide-transferase"
/translation="MILATKVFFTSFVFGFILFPYFIKLLKKISKDGPPIRSCGPESH
LITKKNVPPMGGIIILTSSLLPILLWVQLTPEILLILITLFFALLGFIDYDLKLTN
HYRGLSAKTKILIQFIVALVGVFILKLYSAECFTKTSLSFKGVIIDFGYLYVPFAAFVI
VGSSNAVNLTGDLGDLAATQVITSFAFLGLIAYITQADMNITLFCIAFIGAILSFLWF
NTHPAKIFMGDVGSLSVGAALGLTSVLIKREMLFAVIGIIFVIETLSVIIQISYFKYT
KFKYGEKRVFPYGTNASSL"

```

```

/besthit="qcoverage 96.9594594594595 , hcoverage
88.0368098159509 , similarity 100 , identity 100 , evalue
7.13e-191 , alnlength 287 , Bacteria , Proteobacteria ,
WP_007548592.1 MULTISPECIES:
phospho-N-acetylmuramoyl-pentapeptide-transferase
[Wolbachia]"
gene 5801..6397
/locus_tag="wEsol_00351"
CDS 5801..6397
/locus_tag="wEsol_00351"
/codon_start=1
/transl_table=11
/fullproduct="qcoverage 100 , hcoverage 100 , similarity
100 , identity 100 , evalue 3.92e-139 , alnlength 198 ,
Bacteria , Proteobacteria , WP_015589381.1 MULTISPECIES:
ribonuclease HII [Wolbachia]"
/cog="RnhB COG0164 199 Ribonuclease HII"
/pfam="RNase_HII"
/tigr="TIGR00729 TIGR00729 207 ribonuclease HII"
/product="ribonuclease HII"
/translation="MKYPDFTLENKLSGVIAGVDEVGRGPLAGPVISA AVVFIDRNTI
IDGINDSKKLTPQCRQVLYEKIISVAKFGIGMASVEEINSYNILQATKLSMKRALIDL
DLELDYVLVDGNQPPEVKWQVKSIVNGDNLSTSIAAASIVAKVTRDRMLMQELHNKHPE
YNWYKNKGYGTKEHLNAIGLYGITEHHRKNFAPISRAL"
/besthit="qcoverage 100 , hcoverage 100 , similarity 100
, identity 100 , evalue 3.92e-139 , alnlength 198 ,
Bacteria , Proteobacteria , WP_015589381.1 MULTISPECIES:
ribonuclease HII [Wolbachia]"
gene complement(6401..7183)
/locus_tag="wEsol_00352"
CDS complement(6401..7183)
/locus_tag="wEsol_00352"
/codon_start=1
/transl_table=11
/fullproduct="qcoverage 100 , hcoverage 100 , similarity
100 , identity 100 , evalue 2.72e-188 , alnlength 260 ,
Bacteria , Proteobacteria , WP_015589382.1 MULTISPECIES:
P-type conjugative transfer protein VirB9 [unclassified
Wolbachia]"
/cog="VirB9 COG3504 265 Type IV secretory pathway, VirB9
components"
/pfam="CagX"
/tigr="TIGR02781 VirB9 248 P-type conjugative transfer
protein VirB9"
/product="P-type conjugative
transfer protein VirB9"
/translation="MIGLLFAVLLFLCGSDALAKQEPRSIAGDNHIKVINYNPQAIHK
YTGFYGYQSSILFEPGEIIQNLSMGDSTGWQLLPQGNRLFIPIDDIADTNATIITNK
RVYYFELHAE EATGLDDPRLAYEVRFLYPLFSSDEIYTTNNGDIFEQASHTIIPDIND
IEVVKKGLNFNYSISHVKGSIIPKVFDDGKFTYLQFNKINSDFPAVFMVDSAGYE
SLVNFRFTVDNYLIIERVSSVFTLRNGSSTVCLFNETIPFKKG"
/besthit="qcoverage 100 , hcoverage 100 , similarity 100
, identity 100 , evalue 2.72e-188 , alnlength 260 ,
Bacteria , Proteobacteria , WP_015589382.1 MULTISPECIES:
P-type conjugative transfer protein VirB9 [unclassified
Wolbachia]"
gene complement(7369..7824)
/locus_tag="wEsol_00353"
CDS complement(7369..7824)
/locus_tag="wEsol_00353"

```

```

/codon_start=1
/transl_table=11
/fullproduct="qcoverage 100 , hcoverage 100 , similarity
100 , identity 100 , evalue 5.53e-98 , alnlength 151 ,
Bacteria;Eukaryota , Proteobacteria;Arthropoda ,
WP_007548591.1 MULTISPECIES: outer membrane lipid
asymmetry maintenance protein MlaD [Wolbachia]"
/cog="Ttg2C COG1463 359 ABC-type transport system
involved in resistance to organic solvents, periplasmic
component"
/pfam="MCE"
/tigr="TIGR00996 Mtu_fam_mce 291 virulence factor Mce
family protein"
/product="outer membrane
lipid asymmetry maintenance protein MlaD"
/translation="MRRSNILEITAGLFVLIFTIFLIFFAIDKLSYIKKNYKDCYKIY
GLFANANGIGVGDSVKISGVDVGSITGVSLDKATYVARIDMCISKDIKLPIDSSALIT
SSGVVGSKFVNISPGSDIKLILHGGKIEYTQAEANMGGIMDRILGMFTK"
/besthit="qcoverage 100 , hcoverage 100 , similarity 100
, identity 100 , evalue 5.53e-98 , alnlength 151 ,
Bacteria;Eukaryota , Proteobacteria;Arthropoda ,
WP_007548591.1 MULTISPECIES: outer membrane lipid
asymmetry maintenance protein MlaD [Wolbachia]"
gene complement(7827..8141)
/locus_tag="wEsol_00354"
CDS complement(7827..8141)
/locus_tag="wEsol_00354"
/codon_start=1
/transl_table=11
/fullproduct="qcoverage 100 , hcoverage 100 , similarity
100 , identity 100 , evalue 1.73e-74 , alnlength 104 ,
Bacteria , Proteobacteria , WP_007548590.1 MULTISPECIES:
NADH-ubiquinone oxidoreductase subunit NDUFA12 family
protein [Wolbachia]"
/cog="COG3761 COG3761 118 NADH:ubiquinone oxidoreductase
17.2 kD subunit"
/pfam="NDUFA12"
/product="NADH-ubiquinone
oxidoreductase subunit NDUFA12 family protein"
/translation="MLSKICNAIKRLLRREDKFFVGRDENGNSYYESSKGKRWVMYSSV
SEPTTVPPEWHIWLHYTDNVVPVNNKKRKVKHTPNLTGTKDAYYPNQKVKNYYKSWSP
DN"
/besthit="qcoverage 100 , hcoverage 100 , similarity 100
, identity 100 , evalue 1.73e-74 , alnlength 104 ,
Bacteria , Proteobacteria , WP_007548590.1 MULTISPECIES:
NADH-ubiquinone oxidoreductase subunit NDUFA12 family
protein [Wolbachia]"
gene 8206..9672
/locus_tag="wEsol_00355"
CDS 8206..9672
/locus_tag="wEsol_00355"
/codon_start=1
/transl_table=11
/fullproduct="qcoverage 100 , hcoverage 100 , similarity
100 , identity 100 , evalue 0.0 , alnlength 488 ,
Bacteria , Proteobacteria , WP_015589384.1 MULTISPECIES:
NADH-ubiquinone oxidoreductase [unclassified Wolbachia]"
/cog="HyfB COG0651 504 Formate hydrogenlyase subunit
3/Multisubunit Na+/H+ antiporter, MnhD subunit"
/pfam="NADHdeh_related Oxidored_q1"

```

```

/tigr="TIGR00944 2a6301s04 463 multicomponent
K+:H+antiporter"
/product="NADH-ubiquinone
oxidoreductase"
/translation="MQLPILQVIIPIIASMFCLAKKHKVSWFISFIATTITLIISII
LLIKTYKGEIITYHLGNWAPPYGIELRIDVLNSLILTLVNFIALISVLYSFYINEKEI
SKNKITGFYSLFLLCLSGLLGILVTNDIFNLYVFLEISSLSYVLVSMGRDKKALVAA
FECLISGTIGATFYLFYGIGLLYSMTGTLNMSDMAERIVPLYDNNIIKLGTLFIFVGLS
IKMALFPLSRWLVNAYSEAPSFISIFFSGTVTKVMIYVFIRIFYTVFHFQNFLLFKPLL
DNVIIILALCAIVFGSIFAITAKDIKRLLAHSSISQIGYIILALSFNSTGVFAAILH
IVNHSIIKTSLFMAAGCISYKFDTTKIENLSGLKKSMPTALAFTLFSLALIGMPLTN
GFISKWYIMKAIIESHAWISLVTFAAGSFLALIYMWKMVEKMYFENDATSRTGMTDPK
INDVPPFMLFCLLFMAALTVVVTGIYSTSIRLVVEKLVF"
/besthit="qcoverage 100 , hcoverage 100 , similarity 100
, identity 100 , evalue 0.0 , alnlength 488 , Bacteria ,
Proteobacteria , WP_015589384.1 MULTISPECIES:
NADH-ubiquinone oxidoreductase [unclassified Wolbachia]"
gene 9726..10616
/locus_tag="wEsol_00356"
CDS 9726..10616
/locus_tag="wEsol_00356"
/codon_start=1
/transl_table=11
/fullproduct="qcoverage 99.6621621621622 , hcoverage
80.3814713896458 , similarity 99.3 , identity 99.0 ,
evalue 7.44e-189 , alnlength 295 , Bacteria ,
Proteobacteria , MBH5362260.1 rod shape-determining
protein RodA [Wolbachia endosymbiont of Kradibia
gibbosae]"
/cog="FtsW COG0772 381 Bacterial cell division membrane
protein"
/pfam="FTSW_RODA_SPOVE"
/tigr="TIGR02210 rodA_shape 357 rod shape-determining
protein RodA"
/product="rod shape-determining protein
RodA"
/translation="MDRLKKIHWLLVINVIALFCVGIVVQYSSAGGKWVPFAIHQLVI
FSFFFLFAIAMSFIELDYFKYAYFFFYIAAAISLLAVNFFGSHIMGSTRWIRIGSISL
QPSEFAKVGLILALARYFDKQSVYKMMFEKILLKALIIIFLPVFLVLKQPNLGTAVIM
LFIGISIIIFTAIIKRSHSVICGTLGIFAVPAIWPFLRPYHKQRILSFLDSSVDPLGIG
YNAQQSQIAIGSGLLGKGFVNGSQTLGLFLPEKRTDFAFAVLSEEWGFLGSMALILL
YTSLLGIIIFSIAYRSKKLFF"
/besthit="qcoverage 99.6621621621622 , hcoverage
80.3814713896458 , similarity 99.3 , identity 99.0 ,
evalue 7.44e-189 , alnlength 295 , Bacteria ,
Proteobacteria , MBH5362260.1 rod shape-determining
protein RodA [Wolbachia endosymbiont of Kradibia
gibbosae]"
gene 10681..10830
/locus_tag="wEsol_00357"
CDS 10681..10830
/locus_tag="wEsol_00357"
/codon_start=1
/transl_table=11
/product="hypothetical protein"
/pfam="FTSW_RODA_SPOVE"
/tigr="TIGR02210 rodA_shape 357 rod shape-determining
protein RodA"
/translation="MGLLPVIGDPLPFLSYGGSTTAASLICIGLLLLAIKADEQQNACI
LPMLK"

```

```

/cog="FtsW COG0772 381 Bacterial cell division membrane
protein"
/besthit="qcoverage 97.9591836734694 , hcoverage
26.2295081967213 , similarity 100 , identity 100 , evaluate
1.21e-23 , alnlength 48 , Bacteria , Proteobacteria ,
AOV88385.1 rod shape-determining protein RodA, partial
[Wolbachia endosymbiont of Drosophila incompta]"
gene 10856..12241
/locus_tag="wEsol_00358"
CDS 10856..12241
/locus_tag="wEsol_00358"
/codon_start=1
/transl_table=11
/fullproduct="qcoverage 100 , hcoverage 100 , similarity
100 , identity 100 , evaluate 0.0 , alnlength 461 ,
Bacteria , Proteobacteria , WP_015589386.1 MULTISPECIES:
amidophosphoribosyltransferase [Wolbachia]"
/cog="PurF COG0034 470 Glutamine
phosphoribosylpyrophosphate amidotransferase"
/pfam="GATase_2 GATase_4 GATase_2 GATase_6 GATase_7
GATase_2 Pribosyltran"
/tigr="TIGR01134 purF 432 amidophosphoribosyltransferase"
/product="
amidophosphoribosyltransferase"
/translation="MLDEMREECGVFGISCNQSAAFNSILALHALQHRGQESFGVATS
NNDKLHSYHFQGVSSVFDIDEIKKSLPGDCAIGHVRYSTSGSKFGVQPMFGKSGKF
GDFAIAHNGNLINISPIRKQLIKQECVFQSDIDTEVVVHLTASGEKDSFLESFIYALK
QIQGAYSFVAINQEVVIGVRDPGIRPLVLGKLNGSYVLASETCALDIVNAEFVREIE
PGELVTIDRNGNLASAFPFPQKSSFCIFEYVYFSRPDSIMENRSIYDIRKEIGKILA
EESPPKNNVDMVPIPDGIPAAIGYAKHSGLPMEGLIIRNHYIGRTFIQPTAEVRKV
RIKLKFNANKHTLKGKNIILIDDSIVRGSTLTNIIVMLKDAGVKEIHLKISSPPIKHS
CFYGIDTPECKDLIAANKSVEEIKEVIGVDSLAFSLIDGLYQAVKGGEVRNNATPQYCD
ACFTGDYPIGK"
/besthit="qcoverage 100 , hcoverage 100 , similarity 100
, identity 100 , evaluate 0.0 , alnlength 461 , Bacteria ,
Proteobacteria , WP_015589386.1 MULTISPECIES:
amidophosphoribosyltransferase [Wolbachia]"
gene complement(12263..12769)
/locus_tag="wEsol_00359"
CDS complement(12263..12769)
/locus_tag="wEsol_00359"
/codon_start=1
/transl_table=11
/fullproduct="qcoverage 100 , hcoverage 100 , similarity
100 , identity 100 , evaluate 1.13e-121 , alnlength 168 ,
Bacteria , Proteobacteria , WP_141456676.1 MULTISPECIES:
DNA-3-methyladenine glycosylase [unclassified Wolbachia]"
/cog="Mpg COG2094 200 3-methyladenine DNA glycosylase"
/pfam="Pur_DNA_glyco"
/tigr="TIGR00567 3mg 192 DNA-3-methyladenine glycosylase"
/product="
DNA-3-methyladenine glycosylase"
/translation="MSNIILPRNFYERPTLTVAGELLGKVLKFSNFSGVITEVEAYIG
MNDPACHAARGYTNRTSVMFGMPGFSYVYFIYGMYYCLNIVTEAEGFPAAVLIRGLKL
IEPLEANLGGPGILCKRLNITKEHNKQDLTISHKFCVYESHLKPDYICTPRIGISKGO
EKFWRFKI"
/besthit="qcoverage 100 , hcoverage 100 , similarity 100
, identity 100 , evaluate 1.13e-121 , alnlength 168 ,
Bacteria , Proteobacteria , WP_141456676.1 MULTISPECIES:
DNA-3-methyladenine glycosylase [unclassified Wolbachia]"

```

```

gene      complement(12886..13698)
          /locus_tag="wEsol_00360"
CDS       complement(12886..13698)
          /locus_tag="wEsol_00360"
          /codon_start=1
          /transl_table=11
          /fullproduct="qcoverage 100 , hcoverage 100 , similarity
100 , identity 100 , evalue 1.02e-188 , alnlength 270 ,
Bacteria , Proteobacteria , WP_015589388.1 hypothetical
protein [Wolbachia endosymbiont of Drosophila simulans]"
          /translation="MLDSNETVSLIVDQNIAGSVSGSIPNKDKCRYVTLDDEETWKR
FFVDQNNPSTNTTNKVIVKPHVHKNSDGMRYRYTAEETKYHGREIVGKAAKQIEEEISK
NIDAKLIKLRKTNIDNSVKPVIRIALNDYIKEVNLHDILSGNMCKKYDVKTVTLLLP
DQKTRGVRCQIDKDGARIYEVANGSYQMALKWYVDGQECKIKILISDDGTIKPIEGNG
VTEEQLRANQEVKVGRRQYEAQPLHEALASQLPQTQLQQSSSEEVKSWSNFQQM"
          /product="hypothetical protein"
          /besthit="qcoverage 100 , hcoverage 100 , similarity 100
, identity 100 , evalue 1.02e-188 , alnlength 270 ,
Bacteria , Proteobacteria , WP_015589388.1 hypothetical
protein [Wolbachia endosymbiont of Drosophila simulans]"
gene      complement(13776..14756)
          /locus_tag="wEsol_00361"
CDS       complement(13776..14756)
          /locus_tag="wEsol_00361"
          /codon_start=1
          /transl_table=11
          /fullproduct="qcoverage 100 , hcoverage 100 , similarity
100 , identity 100 , evalue 5.45e-228 , alnlength 326 ,
Bacteria , Proteobacteria , WP_015589389.1 MULTISPECIES:
Holliday junction branch migration DNA helicase RuvB
[unclassified Wolbachia]"
          /cog="RuvB COG2255 332 Holliday junction resolvase,
helicase subunit"
          /pfam="RuvB_N Pfam-B_736 Rad17 Pfam-B_11659 TIP49 AAA_16
Bac_DnaA DUF815 NB-ARC Mg_chelatase AAA_5 AAA_22 NTPase_1
AAA_3 AAA AAA_14 AAA_24 AAA_17 AAA_18 Pfam-B_17810
RuvB_C"
          /tigr="TIGR00635 ruvB 305 Holliday junction DNA helicase
RuvB"
          /product="Holliday junction
branch migration DNA helicase RuvB"
          /translation="MKSISCGKEYTEDVRNINIRPEQLDDFVGQKDLIQNLKVFINAA
QTRTEALDHVLLYGPPGLGKTTLAQIVSKELRVSFRTSGPLLSKAGDLAAVLTTLNA
KDVLFIDEIHRNLNRSIEEVLYTAMEDFCLDILVGEGPSTRTRLRIDLPFTLIGATTRL
GLLSAPLRDRFGIPLHLEFYSFEEELVDIIKRGARVLSAEIEEGAAREIACRARGTPRI
ALRLLRIRDFVEVKDDKKITYEVADSVLLKLGVDKMGMLNKLDMNYLRFLFNTSGPVG
IDTISIALSEDVGNIEETVEPYLIKISFVKRTPRGRVLTDAQEKEYLSFQH"
          /besthit="qcoverage 100 , hcoverage 100 , similarity 100
, identity 100 , evalue 5.45e-228 , alnlength 326 ,
Bacteria , Proteobacteria , WP_015589389.1 MULTISPECIES:
Holliday junction branch migration DNA helicase RuvB
[unclassified Wolbachia]"
gene      complement(14753..15334)
          /locus_tag="wEsol_00362"
CDS       complement(14753..15334)
          /locus_tag="wEsol_00362"
          /codon_start=1
          /transl_table=11
          /fullproduct="qcoverage 100 , hcoverage 100 , similarity
100 , identity 100 , evalue 4.06e-125 , alnlength 193 ,

```

Bacteria , Proteobacteria , WP\_141456674.1 MULTISPECIES:  
 Holliday junction branch migration protein RuvA  
 [unclassified Wolbachia]"  
 /cog="RuvA COG0632 201 Holliday junction resolvasome,  
 DNA-binding subunit"  
 /pfam="RuvA\_N RuvA\_C"  
 /tigr="TIGR00084 ruvA 192 Holliday junction DNA helicase  
 RuvA"  
 /product="Holliday junction  
 branch migration protein RuvA"  
 /translation="MIGNLSGIVDEVRSDHILNVNDVGYMVYLSAKTLSACAIGSRI  
 KLLIETYANNRENTTQLYGFISEEEQQCLRLLVKVGVSYSKTAMSILSKLTPEQLFLA  
 IMNEDKVALKMSGLGLKLINRIITELSGKVSKEINNNTNFPINEDALSALINLGYEK  
 VKAYDTIKKIQDKSSNLDTKDIIRIALKELSIL"  
 /besthit="qcoverage 100 , hcoverage 100 , similarity 100  
 , identity 100 , evalue 4.06e-125 , alnlength 193 ,  
 Bacteria , Proteobacteria , WP\_141456674.1 MULTISPECIES:  
 Holliday junction branch migration protein RuvA  
 [unclassified Wolbachia]"  
 gene complement(15983..16108)  
 /locus\_tag="wEsol\_00363"  
 CDS complement(15983..16108)  
 /locus\_tag="wEsol\_00363"  
 /codon\_start=1  
 /transl\_table=11  
 /product="hypothetical protein"  
 /translation="MSNLFKVNFQNPRIYKTTGKMVRSGNLWLRRTAAVSLSR"  
 gene complement(16196..16525)  
 /locus\_tag="wEsol\_00364"  
 CDS complement(16196..16525)  
 /locus\_tag="wEsol\_00364"  
 /codon\_start=1  
 /transl\_table=11  
 /pfam="Pfam-B\_1658 Pfam-B\_1913 Pfam-B\_4169 SWIM  
 Pfam-B\_1913"  
 /fullproduct="qcoverage 100 , hcoverage 100 , similarity  
 100 , identity 100 , evalue 1.02e-73 , alnlength 109 ,  
 Bacteria , Proteobacteria , WP\_007548583.1 MULTISPECIES:  
 SWIM zinc finger family protein [Wolbachia]"  
 /translation="MRLYYKDITGLIKEPYRSRGRDYFDKRKVQIISVNESQAKSKVV  
 GSNVYRVTLKHDGPLLSGTCSCPAFVYYGPCKHMAATGFALVALDRKEYRSSARPDEQ  
 TLFERFY"  
 /product="SWIM zinc finger  
 family protein"  
 /besthit="qcoverage 100 , hcoverage 100 , similarity 100  
 , identity 100 , evalue 1.02e-73 , alnlength 109 ,  
 Bacteria , Proteobacteria , WP\_007548583.1 MULTISPECIES:  
 SWIM zinc finger family protein [Wolbachia]"  
 gene complement(17489..18739)  
 /locus\_tag="wEsol\_00365"  
 CDS complement(17489..18739)  
 /locus\_tag="wEsol\_00365"  
 /codon\_start=1  
 /transl\_table=11  
 /fullproduct="qcoverage 100 , hcoverage 100 , similarity  
 100 , identity 100 , evalue 9.60e-304 , alnlength 416 ,  
 Bacteria , Proteobacteria , WP\_007548582.1 MULTISPECIES:  
 tyrosine--tRNA ligase [Wolbachia]"  
 /cog="TyrS COG0162 401 Tyrosyl-tRNA synthetase"  
 /pfam="tRNA-synt\_1b S4"

```

/tigr="TIGR00234 tyrS 406 tyrosine--tRNA ligase"
/product="tyrosine--tRNA
ligase"
/translation="MKHASEFLNFIQERGYLYQCTNIEGLDQLLLQSNYIVAYIGFDC
TAPSLHAGHLIQIMMLCHLQKFGYKPIVLLGGGTTKIGDPSFKDKARSILPVENINQN
TSSIRIRILEKMVSFNDSKTGAMIVNNADWLDNIKYIDFLRDIGAYFSVNRMLSFDVSK
TRLDREQTSLSFLEFNMYLLQAYDFIELNKKYDCRLQIGGSDQWGNIVNGIELGKKLNL
PELFGLTMPLLLNAQGKKMGKTESGAVWLDDNMLKPYDYWQYFRNVDDQDVGRFLRL
TDVPIDEIRKLES LKDQEINEAKKVLATEVTKICHGDKEAELAQFAAISAFENEDSSL
LPDYIIKKEQVASGISLVDLLHDTGFEPSPKGAARKRLIQNGCKINDNVNNIDHVINF
ESFKDQPFIKLSAGKKRHIKVVVD"
/besthit="qcoverage 100 , hcoverage 100 , similarity 100
, identity 100 , evalue 9.60e-304 , alnlength 416 ,
Bacteria , Proteobacteria , WP_007548582.1 MULTISPECIES:
tyrosine--tRNA ligase [Wolbachia]"
gene complement(18741..18980)
/locus_tag="wEsol_00366"
CDS complement(18741..18980)
/locus_tag="wEsol_00366"
/codon_start=1
/transl_table=11
/fullproduct="qcoverage 100 , hcoverage 100 , similarity
100 , identity 100 , evalue 5.36e-53 , alnlength 79 ,
Bacteria , Proteobacteria , WP_041573543.1 MULTISPECIES:
hypothetical protein [unclassified Wolbachia]"
/translation="MELIIQIAGTQLHKRCNFEGNSCTGSGVMKVADTGIQFFMQFHR
KRCIVCLFIIKFQCLGTGFSIRVTFSSINDRIDWGL"
/product="hypothetical protein"
/besthit="qcoverage 100 , hcoverage 100 , similarity 100
, identity 100 , evalue 5.36e-53 , alnlength 79 ,
Bacteria , Proteobacteria , WP_041573543.1 MULTISPECIES:
hypothetical protein [unclassified Wolbachia]"
gene complement(18971..19288)
/locus_tag="wEsol_00367"
CDS complement(18971..19288)
/locus_tag="wEsol_00367"
/codon_start=1
/transl_table=11
/fullproduct="qcoverage 100 , hcoverage 100 , similarity
100 , identity 100 , evalue 4.95e-70 , alnlength 105 ,
Bacteria , Proteobacteria , WP_015589391.1 MULTISPECIES:
ribosome silencing factor [Wolbachia]"
/cog="COG0799 COG0799 115 Uncharacterized homolog of
plant Iojap protein"
/pfam="Oligomerisation"
/tigr="TIGR00090 iojap_ybeB 99 iojap-like
ribosome-associated protein"
/product="ribosome silencing
factor"
/translation="MLSDMKSIIRSTIEEIIDQNKGHDIVTFDVQNKTVIAKYMIIASG
DSSRHVKALAEHVIKSLKPHDKIDVEGMDEGNWVVLNFQGIMVHIFRPEVREYYKIEE
LWN"
/besthit="qcoverage 100 , hcoverage 100 , similarity 100
, identity 100 , evalue 4.95e-70 , alnlength 105 ,
Bacteria , Proteobacteria , WP_015589391.1 MULTISPECIES:
ribosome silencing factor [Wolbachia]"
gene 19393..20079
/locus_tag="wEsol_00368"
CDS 19393..20079
/locus_tag="wEsol_00368"

```

```

/codon_start=1
/transl_table=11
/pfam="AAA_33 AAA_18 AAA_17 Pfam-B_5209"
/fullproduct="qcoverage 100 , hcoverage 100 , similarity
99.6 , identity 99.1 , evaluate 1.05e-151 , alnlength 228 ,
Bacteria , Proteobacteria , AGK00351.1 hypothetical
protein wHa_09360 [Wolbachia endosymbiont of Drosophila
simulans wHa]"
/translation="MFLACTMYILLCIENSFLLVFIIGKTLIYLIGFPGSGKFTTAK
ELCKIIDAVIVSNNLFNNIIFDIVKLQNAEVPDDLWEKIFAVRENVLAILEKHVYKSK
HYIFTNELIEGDPYDQRLYNSVVNLSKKMDMEIFSVVLHCNNEKLVRRVQSEERYQEN
KITDPDFAIKKIEGKRLFIPEGSLEIDNSNLSAKEVAKKIVEEMKKEKNGKLIKTSVT
NHLKTERTRG"
/product="hypothetical protein"
/besthit="qcoverage 100 , hcoverage 100 , similarity 99.6
, identity 99.1 , evaluate 1.05e-151 , alnlength 228 ,
Bacteria , Proteobacteria , AGK00351.1 hypothetical
protein wHa_09360 [Wolbachia endosymbiont of Drosophila
simulans wHa]"
gene 20072..20560
/locus_tag="wEsol_00369"
CDS 20072..20560
/locus_tag="wEsol_00369"
/codon_start=1
/transl_table=11
/fullproduct="qcoverage 100 , hcoverage 100 , similarity
99.4 , identity 99.4 , evaluate 5.42e-117 , alnlength 162 ,
Bacteria , Proteobacteria , WP_006279569.1 MULTISPECIES:
RNA pyrophosphohydrolase [Wolbachia]"
/cog="MutT COG0494 161 NTP pyrophosphohydrolases
including oxidative damage repair enzymes"
/pfam="NUDIX"
/product="RNA
pyrophosphohydrolase"
/translation="MVEQKDKYRPCVGIMLFNRQGHAFIGKRFDSDSYWQMPQGGVDD
GEELEQAALRELLEEVGTNKVKVITKSKDWIYYNLPEEVIPICWNGKYSGQKQRWFLM
KFCGEDEDIDINYTVHPEFKEWRWQGIDSLVASAISFKKEVYKTVIEEFSSIIKASTI
SS"
/besthit="qcoverage 100 , hcoverage 100 , similarity 99.4
, identity 99.4 , evaluate 5.42e-117 , alnlength 162 ,
Bacteria , Proteobacteria , WP_006279569.1 MULTISPECIES:
RNA pyrophosphohydrolase [Wolbachia]"
gene 20557..21324
/locus_tag="wEsol_00370"
CDS 20557..21324
/locus_tag="wEsol_00370"
/codon_start=1
/transl_table=11
/fullproduct="qcoverage 100 , hcoverage 100 , similarity
100 , identity 100 , evaluate 1.34e-181 , alnlength 255 ,
Bacteria , Proteobacteria , WP_006280340.1 MULTISPECIES:
TatD family hydrolase [Wolbachia]"
/cog="TatD COG0084 256 Mg-dependent DNase"
/pfam="TatD_DNase"
/tigr="TIGR00010 TIGR00010 253 hydrolase, TatD family"
/product="TatD family
hydrolase"
/translation="MIVDSHCHLIYFSDDEIPKVISRAEQNGVKVLHNICVSIDDVPK
LLKISSSYDQVYSSVGIIHPLDAAIENGECIHVDELVEFTKNQKVISIGETGLDFYKSD
NKDNQKKSFALHIEASRITGLPLVIHTRSADNEMIDMLRSEMKGAFSGVMHCFASSK

```

```

ELAYQSIDLGLCISFSGIITFKNASLLREIAQNVPRERVLVETDAPYLSPEPYRGKKN
EPAMVKYVVDCLAELWNESPEQVAKVTTSNFFRLFEL"
/besthit="qcoverage 100 , hcoverage 100 , similarity 100
, identity 100 , evalule 1.34e-181 , alnlength 255 ,
Bacteria , Proteobacteria , WP_006280340.1 MULTISPECIES:
TatD family hydrolase [Wolbachia]"
gene complement(21352..22302)
/locus_tag="wEsol_00371"
CDS complement(21352..22302)
/locus_tag="wEsol_00371"
/codon_start=1
/transl_table=11
/fullproduct="qcoverage 100 , hcoverage 100 , similarity
100 , identity 100 , evalule 3.51e-219 , alnlength 316 ,
Bacteria , Proteobacteria , WP_007548577.1 MULTISPECIES:
malate dehydrogenase [Wolbachia]"
/cog="Mdh COG0039 313 Malate/lactate dehydrogenases"
/pfam="UDPG_MGDP_dh_N Ldh_1_N Glyco_hydro_4 Ldh_1_C"
/tigr="TIGR01763 MalateDH_bact 305 malate dehydrogenase,
NAD-dependent"
/product="malate
dehydrogenase"
/translation="MTVQRKKISLIGAGNIGGTLTHMIALRELGDVVLLDISDGIPQG
KALDIAESSPIDGFNVNITGTNRYEDIKNSDAIIITAGIARKPGMSRDDLLQTNAKVM
KEVGENIKKYSPNAFVIVVTNPLDAMVSVVHKFSNLPTNMIVGMAGVLDSSRFYFLA
SELNISVEDISAFVLGGHGDTMVPLINCASVAGVPLTQIIDMGLITQKKVDEIVERTR
NGGKEIVDLLKSGSAYYAPASSAICMLESYLDKRRILPCAAYLNGEYGVVEELFIGVP
VIIGKNGIEKILEVKMNDSEQEMFNKSVNSVRELVKSLGS"
/besthit="qcoverage 100 , hcoverage 100 , similarity 100
, identity 100 , evalule 3.51e-219 , alnlength 316 ,
Bacteria , Proteobacteria , WP_007548577.1 MULTISPECIES:
malate dehydrogenase [Wolbachia]"
gene complement(22306..22878)
/locus_tag="wEsol_00372"
CDS complement(22306..22878)
/locus_tag="wEsol_00372"
/codon_start=1
/transl_table=11
/fullproduct="qcoverage 100 , hcoverage 100 , similarity
100 , identity 100 , evalule 1.49e-139 , alnlength 190 ,
Bacteria , Proteobacteria , WP_007548576.1 MULTISPECIES:
NADH-quinone oxidoreductase subunit C [Wolbachia]"
/cog="NuoC COG0852 176 NADH:ubiquinone oxidoreductase 27
kD subunit"
/pfam="Complex1_30kDa"
/product="NADH-quinone
oxidoreductase subunit C"
/translation="MDKTAKYIQKTKCECIQKDDGIIVIYSTLDEIEKHLFFLRDDE
KCRFELLVDIFGVDYPNREKRFELIYNLLSIVHNIRVHIKLQLCESDMPPSVAKIFST
ALWFEREVFDMYGIEFSDHPDLRRILTDYGFKGHPMLKDFPLTGYYEVRDIETKKVV
YNPIDLPQDFRMFDSLSPWEGKTIKVNTKE"
/besthit="qcoverage 100 , hcoverage 100 , similarity 100
, identity 100 , evalule 1.49e-139 , alnlength 190 ,
Bacteria , Proteobacteria , WP_007548576.1 MULTISPECIES:
NADH-quinone oxidoreductase subunit C [Wolbachia]"
gene complement(22871..23377)
/locus_tag="wEsol_00373"
CDS complement(22871..23377)
/locus_tag="wEsol_00373"
/codon_start=1

```

```

/translation=11
/fullproduct="qcoverage 100 , hcoverage 100 , similarity
100 , identity 100 , evalue 5.80e-124 , alnlength 168 ,
Bacteria , Proteobacteria , WP_174516933.1 NADH-quinone
oxidoreductase subunit B [Wolbachia endosymbiont of
Cardiocondyla obscurior]"
/cog="NuoB COG0377 194 NADH:ubiquinone oxidoreductase 20
kD subunit and related Fe-S oxidoreductases"
/pfam="Oxidored_q6"
/tigr="TIGR01957 nuoB_fam 145 NADH-quinone
oxidoreductase, B subunit"
/product="NADH-quinone oxidoreductase
subunit B"
/translation="MTNQILSNDDWGRYKKEGFLVTKFGDLTDYVMNWARSGLWPMT
FGLACCAVEMMHTASSRYDLDRYGIMFRASPRQSDVMIVAGTLTNKMAAALRKVYDQM
ADPKYVISMGSCANGGGYYHYSYSVVQGCDRIVPVDVYVPGCPPTAEALLYGMLCLQN
KIKRTRNG"
/besthit="qcoverage 100 , hcoverage 100 , similarity 100
, identity 100 , evalue 5.80e-124 , alnlength 168 ,
Bacteria , Proteobacteria , WP_174516933.1 NADH-quinone
oxidoreductase subunit B [Wolbachia endosymbiont of
Cardiocondyla obscurior]"
gene complement(23381..23734)
/locus_tag="wEsol_00374"
CDS complement(23381..23734)
/locus_tag="wEsol_00374"
/codon_start=1
/translation=11
/fullproduct="qcoverage 100 , hcoverage 100 , similarity
100 , identity 100 , evalue 3.18e-74 , alnlength 117 ,
Bacteria , Proteobacteria , WP_006279576.1 MULTISPECIES:
NADH-quinone oxidoreductase subunit A [Wolbachia]"
/cog="NuoA COG0838 123 NADH:ubiquinone oxidoreductase
subunit 3 (chain A)"
/pfam="Oxidored_q4"
/product="NADH-quinone
oxidoreductase subunit A"
/translation="MSEYLTIVIFICVSVVVSFALGILPMFLAVSKPDGEKLSTYECG
FNPLSSARKNFDIKFYLVSIIFDIIFDLEIAFLFPWAVSLSKISYGGFWMMVFLAILT
IGFIYEWCKGALEWE"
/besthit="qcoverage 100 , hcoverage 100 , similarity 100
, identity 100 , evalue 3.18e-74 , alnlength 117 ,
Bacteria , Proteobacteria , WP_006279576.1 MULTISPECIES:
NADH-quinone oxidoreductase subunit A [Wolbachia]"
gene complement(23753..24121)
/locus_tag="wEsol_00375"
CDS complement(23753..24121)
/locus_tag="wEsol_00375"
/codon_start=1
/translation=11
/fullproduct="qcoverage 100 , hcoverage 100 , similarity
100 , identity 100 , evalue 2.37e-85 , alnlength 122 ,
Bacteria , Proteobacteria , WP_015589394.1 MULTISPECIES:
HIT domain-containing protein [Wolbachia]"
/cog="Hit COG0537 138 Diadenosine tetrphosphate (Ap4A)
hydrolase and other HIT family hydrolases"
/pfam="DcpS_C HIT"
/product="HIT
domain-containing protein"
/translation="MSNEVYDSDNIFAQILRGELPCEKVVHENENVLAFHDKYPDAPVH

```

```

ILVIPKNQYISYDDFILKAPEEEIADFFKTVREIAHKYNLEKTGYRLVTNYGENGEQV
VPHFHVHILGGKKLGKHVNS"
/besthit="qcoverage 100 , hcoverage 100 , similarity 100
, identity 100 , evalue 2.37e-85 , alnlength 122 ,
Bacteria , Proteobacteria , WP_015589394.1 MULTISPECIES:
HIT domain-containing protein [Wolbachia]"
gene complement(24125..24382)
/locus_tag="wEsol_00376"
CDS complement(24125..24382)
/locus_tag="wEsol_00376"
/codon_start=1
/transl_table=11
/fullproduct="qcoverage 100 , hcoverage 100 , similarity
100 , identity 100 , evalue 1.37e-51 , alnlength 85 ,
Bacteria , Proteobacteria , WP_006279579.1 MULTISPECIES:
hypothetical protein [Wolbachia]"
/translation="MSEAKKIEERHHS�TVPGDMYHLQPGVITGKRVSGIEPFLKEQQ
DMVKVRELVSLSNLEDASGEAIKPLSTPNVEKNEERGKGRS"
/product="hypothetical protein"
/besthit="qcoverage 100 , hcoverage 100 , similarity 100
, identity 100 , evalue 1.37e-51 , alnlength 85 ,
Bacteria , Proteobacteria , WP_006279579.1 MULTISPECIES:
hypothetical protein [Wolbachia]"
gene complement(24399..25178)
/locus_tag="wEsol_00377"
CDS complement(24399..25178)
/locus_tag="wEsol_00377"
/codon_start=1
/transl_table=11
/fullproduct="qcoverage 100 , hcoverage 100 , similarity
100 , identity 100 , evalue 8.70e-180 , alnlength 259 ,
Bacteria , Proteobacteria , WP_015589395.1 MULTISPECIES:
hypothetical protein [unclassified Wolbachia]"
/translation="MLTRENEKSTSILAKVGNAASGVGSFLGRGVKVLVKGAIYPIWF
KNWFKSWDEMRHDIKNGGRSIIIGNPHEEYDPPIKTTQASKDLGVQITEQKKGTGKVSF
LASRTLTDIPYLSPEQLDKIKKDLPNVTIFREENKIVIEVDVKKIIEDIKTD SKNKG
KSPEEIKKLALQGIADSINGDLKKLAGITGGEFKIHTDLKLLNGIAEKLYKEYDNQKQ
SSDKVVKSDVGQPSETIASGEKKWAQEAIKPGKSQSCGMQK"
/product="hypothetical protein"
/besthit="qcoverage 100 , hcoverage 100 , similarity 100
, identity 100 , evalue 8.70e-180 , alnlength 259 ,
Bacteria , Proteobacteria , WP_015589395.1 MULTISPECIES:
hypothetical protein [unclassified Wolbachia]"
gene 25362..25775
/locus_tag="wEsol_00378"
CDS 25362..25775
/locus_tag="wEsol_00378"
/codon_start=1
/transl_table=11
/fullproduct="qcoverage 83.9416058394161 , hcoverage
94.2622950819672 , similarity 100 , identity 97.4 ,
evalue 4.37e-76 , alnlength 115 , Bacteria ,
Proteobacteria , EAL59246.1
UDP-N-acetylmuramoylalanyl-D-glutamyl-2,6-diaminopimelate-
D-alanyl-D-alanyl ligase, partial [Wolbachia endosymbiont
of Drosophila ananassae]"
/cog="MurF COG0770 451 UDP-N-acetylmuramyl pentapeptide
synthase"
/pfam="Mur_ligase"
/product="EAL59246.1

```

UDP-N-acetylmuramoylalanyl-D-glutamyl-2,6-diaminopimelate-D-alanyl-D-alanyl ligase, partial"  
 /translation="MFKWNTNNIIDATGGRDVNGCNWIHSSNISTDTRSIKKGDLFIALKGRNFDGHNFLHEAFLKGAVAAIVSEGKYKNFPLIIVQDTLKALHDMASYIIRNVLI  
 DAKVIAVTGSVGKNHYKGYATHCFIAIWSVPCKRR"  
 /besthit="qcoverage 83.9416058394161 , hcoverage 94.2622950819672 , similarity 100 , identity 97.4 ,  
 evalule 4.37e-76 , alnlength 115 , Bacteria , Proteobacteria , EAL59246.1  
 UDP-N-acetylmuramoylalanyl-D-glutamyl-2,6-diaminopimelate-D-alanyl-D-alanyl ligase, partial [Wolbachia endosymbiont of Drosophila ananassae]"  
 gene 25723..26892  
 /locus\_tag="wEsol\_00379"  
 CDS 25723..26892  
 /locus\_tag="wEsol\_00379"  
 /codon\_start=1  
 /transl\_table=11  
 /product="hypothetical protein"  
 /pfam="Mur\_ligase\_M Mur\_ligase\_C"  
 /translation="MLHTVLSQYGVSHANEGNLNNNIGLPLTILKAPKNCQYLILEMG  
 MNKAGEIKELSKISNPNIHAVITNIEPAHTENFSSSLFDVAQAKLEILYGMKNNGTLVLS  
 RDNKYYDYLSHANRNVISFGKDKNAEVCLNLIRNDESSVISALSSVIPVLDYLDPG  
 SSIANEHIRRLYNKDWIPASRAGMTSNRVANRLSLKIRLSDNQIINCNLRVQGEHFAY  
 SLLAVAAVVQSLGLDLSKLPLALKNFSVAKGRGNIHKIKYNRKYIHLIDDSYNASPAS  
 MKTAIKTLSTYSNQRKVALLGDMLELGDESIEFHDTLVKIIITENNIDKVYTVGKFMLE  
 LHELLPDNIRGTHFNDSNQLKSDLANIQNNDAILVKGSRGMKMDLIVREFVIKY"  
 /besthit="qcoverage 100 , hcoverage 76.4243614931238 ,  
 similarity 100 , identity 100 , evalule 1.90e-273 ,  
 alnlength 389 , Bacteria , Proteobacteria , WP\_015589396.1  
 UDP-N-acetylmuramoyl-tripeptide--D-alanyl-D-alanine  
 ligase [Wolbachia endosymbiont of Drosophila simulans]"  
 gene 26943..27893  
 /locus\_tag="wEsol\_00380"  
 CDS 26943..27893  
 /locus\_tag="wEsol\_00380"  
 /codon\_start=1  
 /transl\_table=11  
 /fullproduct="qcoverage 100 , hcoverage 100 , similarity 100 , identity 100 , evalule 7.70e-223 , alnlength 316 ,  
 Bacteria , Proteobacteria , WP\_015589397.1 MULTISPECIES:  
 complex I NDUFA9 subunit family protein [unclassified Wolbachia]"  
 /cog="COG0702 COG0702 275 Predicted  
 nucleoside-diphosphate-sugar epimerases"  
 /pfam="RmlD\_sub\_bind adh\_short NAD\_binding\_10 Epimerase  
 NmrA Saccharop\_dh 3Beta\_HSD F420\_oxidored NAD\_binding\_4  
 NAD\_binding\_4 RmlD\_sub\_bind"  
 /product="complex I NDUFA9  
 subunit family protein"  
 /translation="MTKRVIIFGGTGFIGKHIVRRLAAEGYLIKIFTRNQEKAAACKL  
 CGNLGQISIFKGDFDFDEKSVLDGMEECDVAINLVGILYEAKKHDFYAVHVKIAERIAK  
 AAKMKNVPMMIHFSAAGIENSKLSKYAKSKLEGEKAVTSAFQEAIIIRPSLVFGKEDN  
 FFNKFARLATILPFLPLIGNGTTFKFQPICVTDLAEVVYRIISFNKQDKKIYNMGGPKV  
 YSFKSLLKFILNVTNRKCLLVNVSFFMAKLI AFFLENKIIISMLLKPI TGDTNPMLTQD  
 QVKVMMNSSIEKSVDLETMKVRPLAIENNVPEYLKIYRKY"  
 /besthit="qcoverage 100 , hcoverage 100 , similarity 100 , identity 100 , evalule 7.70e-223 , alnlength 316 ,  
 Bacteria , Proteobacteria , WP\_015589397.1 MULTISPECIES:

```

complex I NDUFA9 subunit family protein [unclassified
Wolbachia]"
gene      27910..28320
          /locus_tag="wEsol_00381"
CDS       27910..28320
          /locus_tag="wEsol_00381"
          /codon_start=1
          /transl_table=11
          /product="hypothetical protein"
          /translation="MGFEPTTHSLEGCCSIQLSYGHTTYIKCFLVQVKSSTSCEYDVY
LATPCHCSCVSRAAKIGCEKSIYFRKYIETYLTPFASALIMIVKLLYLLSPICRLKG
KDYLMYRRLMFNLFQYIDTVCLYKTSSTSRFLSK"
          /besthit="qcoverage 46.3235294117647 , hcoverage
91.304347826087 , similarity 100 , identity 98.4 , eval
6.28e-33 , alnlength 63 , Bacteria , Proteobacteria ,
KAB2977954.1 hypothetical protein DEF52_04360 [Wolbachia
endosymbiont of Nasonia oneida]"
gene      29076..30527
          /locus_tag="wEsol_00382"
CDS       29076..30527
          /locus_tag="wEsol_00382"
          /codon_start=1
          /transl_table=11
          /pfam="Terminase_6"
          /fullproduct="qcoverage 100 , hcoverage 100 , similarity
99.6 , identity 99.0 , eval 0.0 , alnlength 483 ,
Bacteria , Proteobacteria , WP_141456669.1 MULTISPECIES:
phage terminase large subunit [unclassified Wolbachia]"
          /translation="MNFLKFIELCFQTVVPGCEYNDYQYIKVIADRLEAASAGEVKRI
IFNMPPRSMKSMCISVAWPAWILGNQPTARIIVASYSQRLSEKHS�DTRCVMQSSWYR
ALFPEIELSKDQNTKYKFQTVQRGYRIATSVGGTLTGEGGDFIIVDDPLSSAQALSET
LRKRAINWFDQTLVTRLNDRKKGIVIVLVMHRLHQEDLTGHLLSKPKNIWHHICLPMIS
ENKQVIYISIKKPMPPVPVIRVAQHCATRRLYNKPASPVRILYSREESQLLYPLDGGKE
EIEMIKVELGSYAFAAQYQQNPLPLSSGIKPEWLKRYKKFPDNLSHITQSWDTAVST
SDMSNFSVCTTWAKIDNKFYLLDVYRAKLEYPKLKEQVLSLAARWTPHAILIEAKTSG
QQLVQELKTNSDLPIIEIVPHDDKLTRFHQIVPIIESGKVFLPHQAVWLNDFFEYEILM
FPETRHDDQVDSTVQYLQWVRNSTSRVAVIRAL"
          /product="phage terminase
large subunit"
          /besthit="qcoverage 100 , hcoverage 100 , similarity 99.6
, identity 99.0 , eval 0.0 , alnlength 483 , Bacteria ,
Proteobacteria , WP_141456669.1 MULTISPECIES: phage
terminase large subunit [unclassified Wolbachia]"
gene      30919..33369
          /locus_tag="wEsol_00383"
CDS       30919..33369
          /locus_tag="wEsol_00383"
          /codon_start=1
          /transl_table=11
          /fullproduct="qcoverage 100 , hcoverage 100 , similarity
100 , identity 99.9 , eval 0.0 , alnlength 816 ,
Bacteria , Proteobacteria , WP_141456668.1 MULTISPECIES:
type I DNA topoisomerase [unclassified Wolbachia]"
          /cog="TopA COG0550 570 Topoisomerase IA"
          /pfam="Toprim Toprim_4 Topoisom_bac zf-C4_Topoisom
Toprim_C_rpt Toprim_C_rpt Toprim_C_rpt"
          /tigr="TIGR01051 topA_bact 632 DNA topoisomerase I"
          /product="type I DNA
topoisomerase"
          /translation="MALLIVESPAKAKTIGKYSKEFKVAASFGHVRLPAKNGSVDP

```

```

DNDFAIKYETIEKAKEYIKELVKAASKTSDIYLATDPDREGEAMAWHVIETLKEKKAI
SNENNIYRVVFNEITKRAVQEAIKNPREINMDLVRAQQARRALDYLVGFSLSPLLWTK
LSGSKSAGRVQSVALKIICEREDEISKFITQEYWSIKAEMQNSKDEAFFAMLSHYDNK
KLEKFDIKNEEEAKNLVREIESRQYAVSTVERKQVKNRPLPPFITSSLQQDAVNKLYF
NVKSVMRIAQNLYEGIDIGGETVGLITYMRTDGFHIADEAINSIRGSIKSLYGDKYL
QSPRKYVKKVKNQEAHEAIRPTDINRTPGSIKDYLTPQFKLYDLIWKRTIASQMES
AILDQVVVEISSTDQKVILRASGSSIFFDGFYRVYQDNIEAENEGLLPAMKEGEACKL
ISVEPKQHFTQPPPRYSEASIVKKMEEIGIGRPSTYATIISVLQDREYVSLDSKRFIP
SSRGKIVTIFLETFFQRCVEYDFTAQMEEKLDLISNGHADWKKELGHFVVPFFGHVNS
VKQMTHTDEVFSGIHDLDVIDWFCSEEGKKEMNTKCPACSDGILKLNFGKAGVFLGCSNY
PECNHTKEITGSNDNSEYPKSLGIDDITNQEVMIKKGPFGLYLEFNNELKKKKTVSIP
KDINVNEIDLSTATQLLSLPKVI GEHPETGKEVKIGLGRFGYYIFYDGRYFSLKKSSK
EVLNRELSEVVQIIANS PCKELKSLGVNEKGKEVFICNGRYGFYIKCGKTNVALGKSA
DIESIDLEKALELIKNNK"
/besthit="qcoverage 100 , hcoverage 100 , similarity 100
, identity 99.9 , evalue 0.0 , alnlength 816 , Bacteria ,
Proteobacteria , WP_141456668.1 MULTISPECIES: type I DNA
topoisomerase [unclassified Wolbachia]"
gene 33427..34053
/locus_tag="wEsol_00384"
CDS 33427..34053
/locus_tag="wEsol_00384"
/codon_start=1
/transl_table=11
/pfam="LRR_4 LRR_8 LRR_6 Pfam-B_10570 LRR_4 LRR_6 LRR_4
MASE1"
/fullproduct="qcoverage 100 , hcoverage 100 , similarity
100 , identity 100 , evalue 1.88e-70 , alnlength 208 ,
Bacteria , Proteobacteria , WP_174516853.1 hypothetical
protein [Wolbachia endosymbiont of Cardiocondyla
obscurior]"
/translation="MIFYTQGDTPALCRLDYTDVSKLVGIPNITRLDLTECKISVKDA
KELAKLTNLTSLHLGKCKISVGVAKELTKLTNLTSLNLIGCKISNEVAKELDKLKKNL
PSLNIIGYKISGKGANVKLQDEVSNSSQEKLKSSSKYYICGATVGLVIGLVAAAYCLGAA
ALTPVGVSVAAFIASAVVGALLGAGVGYAVSTYLESTELNNMQPRRSC"
/product="hypothetical protein"
/besthit="qcoverage 100 , hcoverage 100 , similarity 100
, identity 100 , evalue 1.88e-70 , alnlength 208 ,
Bacteria , Proteobacteria , WP_174516853.1 hypothetical
protein [Wolbachia endosymbiont of Cardiocondyla
obscurior]"
gene complement(34095..34901)
/locus_tag="wEsol_00385"
CDS complement(34095..34901)
/locus_tag="wEsol_00385"
/codon_start=1
/transl_table=11
/fullproduct="qcoverage 100 , hcoverage 100 , similarity
100 , identity 100 , evalue 2.64e-199 , alnlength 268 ,
Bacteria , Proteobacteria , WP_015589401.1 MULTISPECIES:
rhodanese-related sulfurtransferase [unclassified
Wolbachia]"
/cog="COG1054 COG1054 308 Predicted sulfurtransferase"
/pfam="Rhodanese"
/product="rhodanese-related
sulfurtransferase"
/translation="MSFVIATFYHFVELSNYYDMKDEIKATCNNVELKGTILLAEEGV
NATISGERNAIDKIFDFLRSDYRLRDLTWKESAAEYQPFSSMKVKLKR EIVNLGVSNL
DISLKGKYVDPEHWDDFTSQPDVLVIDTRNEYEVKLGKFKNAINPHTQCFREFPQWTE
SFSESKDLKVAMYCTGGIRCEKSTAYMKNLGFNDVYHLKGGILSYLEKTHNKNDNWEG

```

```

ECFVFDDRIAVDNSLTPSNTIKCILCSNQVSTDKLKSVPRGQVVCFNCKL"
/besthit="qcoverage 100 , hcoverage 100 , similarity 100
, identity 100 , evaluate 2.64e-199 , alnlength 268 ,
Bacteria , Proteobacteria , WP_015589401.1 MULTISPECIES:
rhodanese-related sulfurtransferase [unclassified
Wolbachia]"
gene 35031..36629
/locus_tag="wEsol_00386"
CDS 35031..36629
/locus_tag="wEsol_00386"
/codon_start=1
/transl_table=11
/fullproduct="qcoverage 100 , hcoverage 100 , similarity
100 , identity 100 , evaluate 0.0 , alnlength 532 ,
Bacteria , Proteobacteria , WP_015589402.1 MULTISPECIES:
iron ABC transporter permease [unclassified Wolbachia]"
/cog="ThiP COG1178 540 ABC-type Fe3+ transport system,
permease component"
/pfam="BPD_transp_1 Pfam-B_3338 Pfam-B_3338 BPD_transp_1"
/product="iron ABC
transporter permease"
/translation="MFLRVFKNIFLFLVSILFVCPILSLISILFTDTANS GWVISTLF
PEYILSTLILMIGVGGISFIFGVIPAWLTTFFSFPGSKIFEIALFFPISIPGYIVAFV
YVNTLEFSGPVQSSLRDILEWSKGDYWFPEIKSLGGGILVMGFSLYPYVYMLVRSSLK
NVSNSVTIASTLGFSSLKSLFSVIIPSIRPSIIAGLSLVLMEVITDFGTPQFLAIDTF
TTGIYRTWFLHDKYSTTVLAVAELIFVVILIAIEKKLQKKGISYSSINTNSDYHNKR
SISGAIPILIFAYLMCVLPILIGFILPMIPLIYWSIEKGFFIYEAFYNIANSISLSF
ITALISISIAIMIGYTARKNKVINNIARLISLGYAIPNAIIAISIIIFLSRISSFITQ
YVVEISLVGTIGALVYSYLFRFFAISFKAVESGLKKTPEIEWTAYTMGHGPISTCLN
VHIPLIKKSILSGFLLVFMDTIKELTATLIIRPFNFETISTRIYELVSDERYREAAPF
SLIIVIIIGLISTITLFTLDDKDKK"
/besthit="qcoverage 100 , hcoverage 100 , similarity 100
, identity 100 , evaluate 0.0 , alnlength 532 , Bacteria ,
Proteobacteria , WP_015589402.1 MULTISPECIES: iron ABC
transporter permease [unclassified Wolbachia]"
gene complement(36640..>37288)
/locus_tag="wEsol_00387"
CDS complement(36640..>37288)
/locus_tag="wEsol_00387"
/codon_start=1
/transl_table=11
/fullproduct="qcoverage 100 , hcoverage 93.8864628820961
, similarity 100 , identity 100 , evaluate 9.25e-136 ,
alnlength 215 , Bacteria , Proteobacteria ,
WP_103412447.1 MULTISPECIES: Rpn family
recombination-promoting nuclease/putative transposase,
partial [unclassified Wolbachia]"
/pfam="PDDEXK_2 Pfam-B_9730 Pfam-B_12519"
/tigr="TIGR01784 T_den_put_tspse 273 conserved
hypothetical protein"
/product="Rpn family
recombination-promoting nuclease/putative transposase,
partial"
/translation="QLARDKGFEKRAQLYAAKAYSRLDKSGNYIDLKKVFFIAISNC
NLLPEEVDYISTHNIRDIKTNGHYLKDFQFVFIELPKFAKNKVEQLESIVERWCFFFK
YAEETTEEDLKEIAEKAPIIKLAYDELDFRWNKDLVAYEERIMDLRKEEAILEYRL
DLAEEKGIQKGIEKGKIEGKIEVAKAMLANNVDVNTIVKFTGLSISEIEELSGNL"
/besthit="qcoverage 100 , hcoverage 93.8864628820961 ,
similarity 100 , identity 100 , evaluate 9.25e-136 ,
alnlength 215 , Bacteria , Proteobacteria ,

```

WP\_103412447.1 MULTISPECIES: Rpn family  
 recombination-promoting nuclease/putative transposase,  
 partial [unclassified Wolbachia]"

gene complement(27902..27975)  
 /locus\_tag="wEsol\_tRNA-02"

tRNA complement(27902..27975)  
 /locus\_tag="wEsol\_tRNA-02"  
 /gene="tRNA-Arg"  
 /intronpos="0..0"  
 /program="tRNAscan-SE"  
 /cove\_score="80.0"  
 /evidence=predicted  
 /type="Arg"  
 /anticodon=TCT  
 /product="tRNA-Arg (TCT) "

# ORIGIN

```

1 taagagttat agtgctgaca ttagccaact gagaaacaga gtttttgacc gagactttgg
61 agcaaagctt atgtgttaag gtggcacata gaggagtgtc ataaacgact caaagtagga
121 gcagagttag agaatttttc tggagaggct gtattacaag aattttgggc aaacttggtc
181 atgtgcaata tattatcgct tcatatgtgt gatgcacaag ggccttgga cccagatcaa
241 attactgagt atcgttttaa tttttcagtt ttatttggtg taatgaggca gaaactctat
301 caggtactta ttgcgcaaaa aaactttcaa gcccttttta agtatacgcg ctaaagttaa
361 aatccgaccg ggacagccgc aataaagtag ataagcctaa acgccatcat gtcttttagga
421 gagtttgcta atgaaagttc ttaagttgac gtcattgact gttccgattc gttatatgac
481 ataagagcat catatatttc atgcaatgta ttgagatgt ttttttccat atggttgatta
541 atatgcccat atattgtcgt ctcttccgaa cactctgtat ctttatgtat atgattttgt
601 tgctttaatt ctctctatc tacactctct atttgctctg acactagcat aactacccca
661 tattttacat aacgaaataa aaaaattcta actgtagtat gcttatataa tctacgaagt
721 caatagttaa attgaaaagt ttcggttata atttacttca tatagaacat gcccttgaat
781 tatgctaaaa atcgccatag taggcctacc aaatgctgga aaatcgaccc tattcaacag
841 attagtagga agaaaagcag cagtagtgag taacattcca ggagtgacaa gggataggcg
901 agagggaatg gggagaatta gcgatttgga gtttaaagtt atagatacag gaggatggaa
961 cgaccaaact aatttttcac tacaagttat tgaacaaatc gaattttctt tatccaattc
1021 aaacataatt ttctttcttg ttgatgcaaa agtgcaaaat gagcgaaatg aagagtttgc
1081 aaagtggctg aagagaaaaa taaataaacc tgtaatacta gtagcaaata aatgcgagag
1141 tcataaatcc gaaaatggtg attatttgca gttttttgat tttcttggcc cgggtgtatat
1201 ctctgccgag cataatcttg gcatggttga tctttatgat gcattagctg gtgttattga
1261 aaatttttaac gagaacactg agttacctaa caatgaactg agtaggctga ggatcgcgat
1321 catcggccgt ccgaatggtg gaaaatcaac ttttttaaat ggtttacttg cagaaaacag
1381 actaataaca agttcagagc caggtagcac acgtgattct gtggatatta catatgatca
1441 tgatggagag ttaattactc taattgacac tgccggaatc cgcagaaagg cgaatgttgt
1501 agatggctta gaatcaagat ttgttgagaa aagcatggaa tcaatcaagc gctctcatgt
1561 ggtagtttta atgctagact ccctagttgg tattgagcag caggatttat caattggtga
1621 agctgcaatt aaggggaggga aagggattat tgttgtttta aataagtggg atttaatagg
1681 taaggatgac agaagcaggt taataaaatt tgtcaaacia caggaagtaa ccagggttatt
1741 cttggaagtg ccaactataa caatttctgc gttaaaaaggc atgcgctgcg gtgatgtgat
1801 agataagtgt cttgaagtga gtgaatcctt gaacaagaag atcagcactg caaaactgaa
1861 taagtggctc atagatgctg taggaaaaca ttctcaccct cttgtaaaag gcaaagcagt
1921 taaaatgaag tatatcgctc aaattggtac taaacctcca gctttttctt tgatatgtaa
1981 catacctgaa agtggttgatg aaagttacaa acgctattta attaacgata tcagaaaaaa
2041 tttctttgca gacgggtgtg cagtttagatt gcttttgaaa aaaaataaaa atccctatgt
2101 aaaatgaata ctctgcttta tactttcagg gataatttac ttaaagttat gtgtaataat
2161 tccagaattc ctgcaatctt tctgctgtcg agtgccgctg ctctaatttt tgcatatgtg
2221 ctagaatatt ttttcaacat gctgccatgc aagttaatga catacgagcg aatagtttac
2281 tatatcgccg gattacttgc agtagcgtgc atgcttaaag acaacaaaat tctaactctat
2341 gcaatgtttt gcagctacct cataggtgca gtaatatctt tttatcatat aggtcttgaa
2401 ctccacttat ttcattgatgt tttaggttgt acagagcaag caagtggtaa cgtagtata
2461 gaagagctca gaaataatct actaaatcct aattactctc catcttgtga cagacctcat
2521 tacgtttctag gtgtttcctt agcaacatgg aatctaattt atctcatagt agctctgttc
2581 gtatcaggta aggtgtattg tggagaaaga aagaaatcta aataatttaa ggtacagcaa

```

|      |             |             |             |             |             |             |
|------|-------------|-------------|-------------|-------------|-------------|-------------|
| 2641 | caatcagttc  | ttgcaacagg  | caattagagt  | agatcacgct  | ggagaatatg  | gagctatttg  |
| 2701 | cattttattct | ggtcaaaaaat | ttattcttaa  | gaaatcttct  | ataatcaatg  | aaataattga  |
| 2761 | aatggaagag  | caggaaaaaa  | agcatttttca | ctatttttaat | gagaaaaatca | aagagcaaaaa |
| 2821 | agttcgtcct  | actgttttgt  | tgcctgtttg  | gcgtgtttta  | ggagtgtcgc  | ttggcgttgc  |
| 2881 | aactgccatt  | atgggcaaag  | aagctgctat  | ggcttgact   | gctgcagttg  | aagaagttat  |
| 2941 | cggggagcac  | tacaaagagc  | aagtttcaca  | tttagaagat  | ggggaattaa  | gagaaactat  |
| 3001 | aagtaaattt  | cgcgacgagg  | agtttagagca | caaagatatt  | gcaattcagc  | acaatgctga  |
| 3061 | aagcgcattt  | ggctacaaca  | ttttatcatc  | attcataaaa  | acaggctgca  | aaactgctat  |
| 3121 | ttacttgtct  | aagttaattt  | aactaagcag  | ctttcttaaa  | gtgttttaaa  | tgttctgata  |
| 3181 | acaacagaaa  | ccaggaagga  | attcaagtgt  | aacaattatt  | ttataactat  | atttacatat  |
| 3241 | caccattatt  | aataaataat  | tagtatttgt  | aaattaaata  | catctaaagt  | atagactgca  |
| 3301 | aaggaggcaa  | aagtgcgttt  | taatttagaa  | gagggaaatg  | ctcttatgta  | atacctgcca  |
| 3361 | caggttcaca  | actgtacgaa  | cattcatttt  | tgaaggtaaa  | ttgcacagca  | aatggtgtca  |
| 3421 | ttccagtctg  | gaatccagaa  | attttgctta  | taactgagct  | gataagctaa  | aggtaattgt  |
| 3481 | cttactactaa | aacaaacggt  | tttaattaag  | ttgcatagaa  | ccagtgtctg  | ggcactggga  |
| 3541 | tgacacccca  | ctggtggtcc  | aaactacaac  | gttcgtacag  | ttgtggattc  | cagacggctt  |
| 3601 | tgttgcatca  | cactttatga  | gatggtgatt  | tatggtaaat  | tcatgtaact  | atctcaaatt  |
| 3661 | tagccatacc  | aatatcagtg  | aatttattaa  | gcaaatagca  | tttgattagc  | agttcttttt  |
| 3721 | ctcgatttat  | ctcagattta  | ttcctaaaac  | taaatccgaa  | tatttgcttt  | aatcttgaga  |
| 3781 | aaaacccttc  | aatataagat  | cttttcccat  | aatttacttc  | ttttttccat  | tctttcatgc  |
| 3841 | catcttcacc  | gtataatttt  | attaacctaa  | tagcagcatt  | cctgtcagac  | atataatcta  |
| 3901 | tttctggatg  | ttctgccgca  | ttgtttattg  | gtggaatttt  | tgtctttata  | tcatattcgt  |
| 3961 | tacacaactt  | ataaaaacttg | tgcctatcac  | atgctctatc  | tgcataatag  | gcttttatgg  |
| 4021 | catgctgaaa  | atcaacttct  | tttagcaa    | cacaagctcc  | atagtgatca  | gagtagacac  |
| 4081 | cgttactgta  | ttttacagct  | atggcctttt  | tgttgtttat  | attcaacatt  | acgtgcaatt  |
| 4141 | ttctcgtttg  | ctcatagcca  | cgatattttc  | tgtcagtgct  | attttccttg  | ctgtgaccag  |
| 4201 | gagtgttggt  | gtatatacta  | attcctgtac  | tgtctatagc  | aatttcgata  | tcttccatat  |
| 4261 | tattttctgc  | aatcatttat  | cttaatat    | agtttcttaa  | accttcttga  | tgcttgtgaa  |
| 4321 | tagctgataa  | ctgccaaatc  | tcttcctatt  | tgttgcaaat  | acccttttat  | aaacccgact  |
| 4381 | gtttgtctta  | aaccaattct  | aaagaaactg  | acgattatat  | gcacccaaat  | cacaacttta  |
| 4441 | tcactataaa  | tatagttgcc  | gccctgcatt  | tttggaacaa  | tctcgtacca  | attttctatg  |
| 4501 | gcgtcattga  | tataacaaaa  | aatgcttcct  | ctttcttgga  | gaaatttggt  | atattcatgg  |
| 4561 | cagttactga  | ctctcatttt  | ttgtggcata  | ttttttcttc  | aacagttaaa  | tggctattta  |
| 4621 | taatgaattt  | tgtcagtaac  | tgccagttct  | tttcacttga  | gcgatgcaac  | aaagccattc  |
| 4681 | cagactggga  | tgacacccta  | ctgatgggcc  | caaatacaca  | tgttcgtaca  | gttggtgggtc |
| 4741 | aggctatagg  | atgacagaaa  | ttgactttat  | tagctatagg  | tggtatgaca  | ctcagtcaat  |
| 4801 | ttaagtaagc  | agatgatctt  | agctacaaaa  | gtatttttta  | cctcatttgt  | ttttgggttt  |
| 4861 | attccttttc  | cctattttat  | aaagcttcta  | aaaaaaaata  | gcaaagatgg  | gcaaccaatt  |
| 4921 | agatcatgtg  | gaccagaaaag | tcattttaata | acaaaaaaga  | atgtaccacc  | tatgggcgga  |
| 4981 | ataataatac  | tgacttcttc  | tttattacca  | attttactct  | gggttcagtt  | aacaccagaa  |
| 5041 | attttgctgc  | tgatattgat  | aactctattt  | tttgctctac  | ttggatttat  | tgatgattat  |
| 5101 | ttaaaattga  | agacaaatca  | ctatcgaggt  | ttaagtgcaa  | aaacccaaat  | acttattcag  |
| 5161 | tttattgttg  | ctctgggttg  | tgtgtttata  | cttaagctat  | actctgctga  | atgttttaca  |
| 5221 | aaaacgtccc  | tattttaaag  | agtaataata  | gatttttggt  | atctatatgt  | tccgtttgct  |
| 5281 | gcgtttgtaa  | ttgtcggctc  | ttctaattgt  | gtgaatctca  | cagatgggtt  | ggatggcctt  |
| 5341 | gctgcaactc  | aagtcatcac  | ttcctttgct  | tttttggggc  | taattgcata  | tataactcaa  |
| 5401 | gcagatatga  | atattacttt  | attctgcatt  | gcatttatag  | gagctattct  | aagtttcttg  |
| 5461 | tggtttaaca  | cacatccagc  | aaaaatattt  | atgggtgatg  | ttggtagctt  | gtcggtaggc  |
| 5521 | gcagccttag  | ggttaactag  | tgtcctaatt  | aaaagagaaa  | tgctttttgc  | cgttattgga  |
| 5581 | ataatttttg  | taatagagac  | tctatctggt  | attattcaga  | tatcatattt  | taaatataca  |
| 5641 | aagttttaa   | atggagaagg  | aaaaagagtt  | tttccttatg  | gcaccaatgc  | atcatcactt  |
| 5701 | tgaaaagaag  | ggatggtcag  | aaaatgta    | cgttatgaaa  | ttttggataa  | tttctattat  |
| 5761 | ctgttcagtt  | tttactataa  | ctttcttatt  | ataaaaacct  | atgaaatacc  | cagactttac  |
| 5821 | attagaaaa   | aaattatcag  | gagtgatagc  | aggagtggat  | gaagttggaa  | gaggtccgct  |
| 5881 | agctgggtcca | gtaatatccg  | cagccgtagt  | gtttattgat  | agaaatacaa  | ttattgatgg  |
| 5941 | aatcaacgac  | tcgaaaaagt  | tgactcctca  | atgtaggcaa  | gtcctatatg  | aaaaaataat  |
| 6001 | atccgttgca  | aaatttggtg  | taggaatggc  | aagcgtagaa  | gaaataaatt  | catacaatat  |
| 6061 | cttgcaagca  | acaaaacttt  | caatgaaacg  | tgcgttgata  | gacttggacc  | tagaattaga  |
| 6121 | ttatgtgcta  | gttgatggta  | atcaaccacc  | tgaagtgaaa  | tggcaagtga  | aatccatagt  |
| 6181 | aaatggtgat  | aatttgagta  | catcaattgc  | agcagcttca  | atcgttgcaa  | aagttacgag  |

|      |             |             |             |             |             |             |
|------|-------------|-------------|-------------|-------------|-------------|-------------|
| 6241 | agatcggcctt | atgcaagaat  | tgcacaataa  | gcacccctgaa | tataattgggt | ataaaaaataa |
| 6301 | aggatatggg  | acaaaagagc  | accttaacgc  | tattggcctt  | tatggaatta  | cagaacatca  |
| 6361 | tagaaaaaat  | tttgcaccca  | tatctcgggc  | attatagcct  | ttaccctttt  | ttgaaaggta  |
| 6421 | tggttttcatt | aaataggcaa  | actgtactcg  | atccattcct  | taaggtaaac  | actgaactta  |
| 6481 | cccttttcgat | tatcaggtag  | ttatcaactg  | tacggaaatt  | tactaaagac  | tcatatcctg  |
| 6541 | cagaatcaac  | cataaaaact  | gccggaaaat  | cagagtttat  | tttattgaat  | tgtagatatg  |
| 6601 | taaattttcc  | gtcatcaaaa  | accttaattg  | gtattattga  | ctgactacct  | ttgacgtgcg  |
| 6661 | agatggaata  | attaaaattt  | aatcccttct  | ttacaacttc  | aatatcattg  | atatcaggaa  |
| 6721 | taatggtag   | actagcttgt  | tcgaagatat  | caccgttatt  | tgttggtgtaa | atctcatcac  |
| 6781 | tgctaaatag  | tggataaaga  | aaccttactt  | catatgctaa  | tcttggtatca | tctagtccag  |
| 6841 | ttgcttcttc  | agcatgaagt  | tcaaagtaat  | aaactctttt  | attggtaatt  | atagttgcat  |
| 6901 | tagtatcagc  | aatatcatct  | atgggcttaa  | taaacaatct  | gttaccttga  | ggaagaagtt  |
| 6961 | gccaccaggt  | tgaatcacc   | attgaaaggt  | tttgtattat  | ctcccctggg  | tcaaacaata  |
| 7021 | tactggactg  | ataaccataa  | aaaccggtat  | acttatgtat  | agcctgtggg  | ttataattta  |
| 7081 | ttaccctttat | gtgattatct  | ccagctattg  | aacgtggctc  | ctgttttgca  | agtgcacac   |
| 7141 | taccacagag  | gaacaatagt  | acggcaaaca  | gtaaaccaat  | cataatatca  | aatgaatta   |
| 7201 | atcttcattt  | tatcattaat  | agacatgcac  | tgcaactggt  | aaggcacttt  | ctatactata  |
| 7261 | aaccccaaag  | caagcggtag  | aaaaggcaag  | aaataaggta  | aactccttaa  | atactttaga  |
| 7321 | actacaggag  | gcttcacctg  | aacgggtaca  | cttggaatcc  | tgccattttc  | acttcgtaaa  |
| 7381 | cataccaaga  | attctgtcca  | ttattccacc  | catgtttgct  | tcagcttgag  | tatactctat  |
| 7441 | ttaccacca   | tgcaagatta  | gtttaatatc  | tgatccaggt  | gatataattaa | caaatttact  |
| 7501 | gccacaact   | ccactgctag  | tgatcagagc  | tgaactatca  | attggcaatt  | ttatgtcttt  |
| 7561 | gcttatacac  | atatcgattc  | gtgctacgta  | ggtagctttg  | tcaagtgata  | caccagttat  |
| 7621 | gcttccaaca  | tctacaccag  | agatcttgac  | actatcacca  | actcctatac  | cgttagcggt  |
| 7681 | agcaaaaaga  | ccatatattt  | tatagcaatc  | cttatagttt  | ttctttatgt  | aagatagctt  |
| 7741 | atcaatagca  | aagaaaatca  | gaaaaatagt  | aaaaattaat  | acaaataatc  | cagcggttat  |
| 7801 | ttcaagtata  | tttgaccttc  | gcactctttg  | ttatcaggac  | tccagctttt  | atagtaattt  |
| 7861 | ttactttttt  | ggtttgata   | gtatgcatct  | tttgtagccg  | ttaaattagg  | agtatgtttt  |
| 7921 | acttttcttt  | ttttattatt  | aactgggtact | acattatcag  | tatagtgaag  | ccatatatgc  |
| 7981 | cattccggag  | gcactgttgt  | aggctcagaa  | acactgctat  | acataaccca  | cctttttcct  |
| 8041 | ttacttgatt  | catagtaaga  | atttccattt  | tcatctcttc  | ctacaaattt  | atcttctctt  |
| 8101 | cgtaataggc  | gtttttattgc | attacaaatt  | ttagataaca  | taagggtatt  | aaaacaaaaa  |
| 8161 | gtattatata  | tactaataact | ttaacgatat  | attaacaaca  | atttaatgca  | attaccaatc  |
| 8221 | ttacaagtta  | ttatcccaat  | aattgcatca  | atgttttgct  | ttcttgccaa  | gaaacacaag  |
| 8281 | gtatcttggt  | ttatttcttt  | tattgcaaca  | acaatcactc  | ttatcatttc  | atcaatacta  |
| 8341 | ctcattaaaa  | catataaagg  | tgaaattata  | acttatcacc  | ttggaaattg  | ggctcctccg  |
| 8401 | tatggaatag  | agttaagaat  | cgacgtgtta  | aattccttaa  | ttctaaccct  | agtgaatttt  |
| 8461 | atagcgctga  | ttagtgtgct  | ttatagcttt  | tatattaacg  | aaaaagagat  | tagcaaaaac  |
| 8521 | aaaatcactg  | gttttttactc | tctattttcta | ctgtgcttaa  | gcggactgct  | cgggattcta  |
| 8581 | gtaacaaacg  | acataatttaa | cctttacggt  | ttcttgga    | tttcatctct  | ttcttcttat  |
| 8641 | gtattagttt  | caatgggaag  | ggataaaaaa  | gccttggttg  | cagcatttga  | atgtctaatt  |
| 8701 | agtggaacaa  | taggtgcaac  | attttatttta | tttggtcatcg | ggctcttgta  | ttcaatgact  |
| 8761 | ggaacgctca  | atatgtctga  | catggctgaa  | agaatagttc  | cattatacga  | taacaacatc  |
| 8821 | ataaaaacttg | gcacgttggt  | catttttggt  | ggtctctcaa  | tcaaaatggc  | actgtttcca  |
| 8881 | ttaagcaggt  | ggctgggttaa | tgcataatagt | gaggcgccaa  | gtttcattag  | catattcttt  |
| 8941 | tcaggcacag  | tgacaaaagt  | gatgatatat  | gttttcatca  | gaatctttta  | tactgttttt  |
| 9001 | catcaaaatt  | ttttcttggt  | taagccgcta  | ctggacaatg  | tgataattat  | cctcgcactt  |
| 9061 | tgcgctattg  | tatttggttc  | gatatttgca  | ataaccgcaa  | aagacataaa  | aagactgctt  |
| 9121 | gctcactcta  | gtattagcca  | aattgggttat | ataatttttag | cactgagttt  | taactcaaaa  |
| 9181 | acaggtgtat  | ttgcagcaat  | tcttcacata  | gtaaacacaca | gcataataaa  | aacatcttta  |
| 9241 | tttatggctg  | caggatgtat  | ttcttacaaa  | tttgatacaa  | caaaaataga  | gaatttatcg  |
| 9301 | ggactcaaga  | aatcaatgcc  | ttatacagca  | cttgcggttca | ctctatttcag | tttagcatta  |
| 9361 | atcggtatgc  | ctttaacaaa  | tggcttttata | agcaagtggg  | atataatgaa  | agcaattatc  |
| 9421 | gaatctcatg  | cgtggatttc  | ccttgtaaca  | tttgctgctg  | gctctttcct  | tgcatgata   |
| 9481 | tatatgtgga  | agatggtaga  | gaaaatgtat  | tttgaaaatg  | atgcaacgtc  | acgcactgga  |
| 9541 | atgacaccgg  | acaaaattaa  | tgatgtgcca  | tttcctatgc  | ttttttgtct  | attgtttatg  |
| 9601 | gcagcttttaa | cagtagtaac  | tggaaatata  | agtacttcaa  | ttcgggttagt | agttgagaag  |
| 9661 | ttggtttttt  | gatttttatc  | tttgtttcat  | attttactat  | actttaagggt | tataagggtct |
| 9721 | ttattgtgga  | taggctgaag  | aagattcatt  | ggttggttagt | cattaacgtg  | atagcgctgt  |
| 9781 | tttgcgttgg  | cattgttgtt  | caatactctt  | ctgctggagg  | aaagtgggtg  | ccatttgcga  |

|       |             |             |             |             |             |             |
|-------|-------------|-------------|-------------|-------------|-------------|-------------|
| 9841  | ttcaccaact  | ggtcatattc  | tccttctttt  | tcctattcgc  | tatagctatg  | tcattcatag  |
| 9901  | agctagat    | ttacttgaag  | tacgcctact  | ttttttatat  | agcagcagcg  | atcttcgctat |
| 9961  | tagcagtaaa  | tttttttggc  | tcacacataa  | tgggttcaac  | aaggtggata  | agaattggat  |
| 10021 | caattagttt  | gcagccatca  | gaatttgcaa  | aagtaggctt  | aatacttgcg  | cttgctcgct  |
| 10081 | atthttgataa | gcagagtgtg  | tataaaatga  | tggaaattta  | aatattgctt  | aaggcactta  |
| 10141 | taattatttt  | cttaccctgt  | ttcttgggtg  | taaagcaacc  | taatttaggc  | acagctgtga  |
| 10201 | taatgttatt  | tatagggata  | tcaattatat  | tcacagcaat  | aataaaaaaga | tctcattcgg  |
| 10261 | taatatgtgg  | aacgcttggc  | atthtttgag  | taccggctat  | ttggcctttt  | ttacgtcctt  |
| 10321 | atcacaagca  | aaggatattg  | tcgttttttg  | attcatcagt  | ggatccactt  | gggatagggt  |
| 10381 | ataatgcgca  | gcaatctcag  | atagctattg  | gttcaggagg  | tttgcttggg  | aagggttttg  |
| 10441 | ttaacggaag  | tcaaactcaa  | cttggaattt  | tgccggaaaa  | gcgtacagat  | tttgcttttg  |
| 10501 | cagtgtctgag | tgaggagtgg  | ggcttttttag | gtagcatggc  | tttaattttg  | ctttataacct |
| 10561 | cattacttgg  | cataattttc  | tctatcgctt  | ataggtcgaa  | aaaatttatt  | ttctaagtgc  |
| 10621 | ttatctatcg  | gcatttttcg  | ctttttttag  | gctcattttt  | ttataaacat  | cggaatgaca  |
| 10681 | atgggcctct  | tacctgtgat  | aggcgaccca  | ttgccatttc  | tttcctatgg  | aggaagtaca  |
| 10741 | actgctgcaa  | gcttgatatg  | cataggatta  | ttgctggcaa  | taaaagcaga  | tgaacaacaa  |
| 10801 | aatgcttgta  | ttttacctat  | gctaaagtaa  | aattaaactt  | tacttaatag  | tttttatgct  |
| 10861 | agatgaaatg  | cgtgaggagt  | gtgggggtatt | tggcataagt  | tgcaacccaa  | gtgctgcttt  |
| 10921 | taactctata  | cttgctctcc  | acgctttgca  | gcatagaggt  | caagagtctt  | ttggcgtagc  |
| 10981 | aaccagtaac  | aacgataagc  | tgcactctta  | tcactttcaa  | ggtcaagtga  | gcagcgtatt  |
| 11041 | tgatgatata  | gatgaaataa  | agaaatcctt  | acctggagat  | tgtgcaatag  | gtcatgttcg  |
| 11101 | atactcaaca  | agtggtagta  | aatttgaggt  | gcagcccatg  | tttggaacaa  | gtggcaaatt  |
| 11161 | tgggggatttt | gccatagcac  | ataatggtaa  | tttaattaat  | atttctccga  | tacgcaaaca  |
| 11221 | attaattaaa  | caagagtgcg  | tttttcagtc  | agatattgat  | acagaagtag  | tagtgcatct  |
| 11281 | gacagcaagc  | ggtgaaaaag  | atagcttctt  | agagagtttt  | atatatgcat  | taaagcaaat  |
| 11341 | acaaggtgct  | tattcttttg  | tggcaatcaa  | tcaagaagta  | gttattggag  | tacgtgatcc  |
| 11401 | gtctggaatc  | aggcctcttg  | ttttaggaaa  | gttaaaccgt  | tcttacgttc  | ttgcatctga  |
| 11461 | aacttgtgct  | cttgatatag  | taaatgcaga  | gtttgttaga  | gaaatagaac  | caggtgagtt  |
| 11521 | agtcaccatt  | gatcgaaatg  | gtaatctagc  | ttcagcattt  | cctttcccac  | agcaaaaatc  |
| 11581 | aagtttttgt  | atthtttgaat | acgtttattt  | ttcaagacca  | gatagcataa  | tggagaatag  |
| 11641 | gtccatata   | gatataagaa  | aagaaatagg  | aaaaataact  | gcagaagaga  | gcccacccaa  |
| 11701 | aaacaatgta  | gatattggtt  | taccaatacc  | tgattctgga  | atacctgcag  | ctattggata  |
| 11761 | tgcaaagcat  | tcaggattac  | ctatggaact  | gggaataatt  | cgtaatcatt  | acataggaag  |
| 11821 | aactttttata | caaccaaccg  | ctgaagtacg  | taaagttaga  | ataaaaattaa | aattcaatgc  |
| 11881 | taataagcac  | actttgaaag  | gtaaaaacat  | aatttttaata | gatgatagta  | tagtgctgtg  |
| 11941 | tagtacgtta  | acaaatataa  | tagttatgct  | aaaggatgca  | ggagtaaaag  | agattcacct  |
| 12001 | caaaattttca | agccccacca  | ttaagcattc  | ttgttttttat | ggaatagata  | caccagagtg  |
| 12061 | caaagatttta | attgctgcaa  | ataaatctgt  | agaggaaaatt | aagggaagtta | taggagtaga  |
| 12121 | tagccttagcc | ttcttgagta  | ttgatggact  | atatcagggt  | gttaaaggag  | aggtgctgaa  |
| 12181 | caatgctaca  | ccacaatatt  | gtgatgcttg  | tttcaactgg  | gattatccga  | ttggcaaata  |
| 12241 | atctacgtaa  | gatcactgga  | gctcagatct  | taaaccgcca  | aaatttctct  | tggcctttac  |
| 12301 | taattccgat  | tctcgggggtg | caaataataat | ctggtttgag  | gtgagattca  | taaacacaaa  |
| 12361 | atthgtggct  | tatagtaaag  | tcctgtttgt  | tatgttcttt  | tgtaatattt  | aatcttttac  |
| 12421 | acaatattcc  | tggccccact  | aaatttgctt  | caagcggttc  | aatgagcttt  | aatcctcgta  |
| 12481 | ttaacactgc  | tgttggggaat | ccttctgctt  | ctgttacaat  | atthtagaaa  | tagtacatcc  |
| 12541 | catatataaa  | atatacgtac  | gaaaatcccg  | gcataccaaa  | cattactgaa  | gttcgattag  |
| 12601 | tatagcctct  | tgccgcgtga  | caagctgggt  | cattcattcc  | tatataggct  | tcaacttcgg  |
| 12661 | ttattactcc  | actaaagtta  | gaaaatttaa  | ggacttttcc  | caataactct  | ccagctacag  |
| 12721 | ttaaggtcgg  | ccgctcgtag  | aaatttcttg  | gtagtattat  | gttgctcatt  | ataagagtat  |
| 12781 | aagttacttg  | caggtgcaag  | caacttatac  | taattattac  | ttttgttttt  | tcttacttac  |
| 12841 | tcatttgagc  | agcaggagct  | tgatgctttt  | gtgttggtgt  | ctctgttaca  | tctgttgaaa  |
| 12901 | gttgctccaa  | gattttactt  | cttcagaact  | ttgttgtaat  | tgtgtttgtg  | gcaattgtga  |
| 12961 | tgctaatgct  | tcagttaaag  | gctttgcttc  | atattgcctt  | cccactttta  | cttcttgggt  |
| 13021 | tgcacgtaac  | tgttcttcag  | ttacgccatt  | accctcgatg  | ggcttttatag | taccatcatc  |
| 13081 | actaatgagg  | atthttaattt | tgcattcttg  | tccatcaaca  | taccacttta  | gagccatttg  |
| 13141 | atatgatcca  | ttagccactt  | cataaattct  | tgcacctacc  | ttatcaattt  | ggcaacgtac  |
| 13201 | cccccttggt  | ttttggtcag  | gtagtagcaa  | cgtaactgtc  | tttatactgt  | actttttgca  |
| 13261 | catattacca  | cttagaatat  | catgcaagtt  | tacttctttt  | atataatcgt  | tcagcgcaat  |
| 13321 | tcttatgaca  | ggcttaacac  | tgttatctat  | atthtttagtt | tctcttaatt  | ttataagctt  |
| 13381 | tgcatacaata | ttthttagata | tctcttcttc  | aatttgttta  | gcagctttgc  | ctacaatttc  |

|       |             |             |              |             |             |             |
|-------|-------------|-------------|--------------|-------------|-------------|-------------|
| 13441 | ccgaccatga  | tattttggtct | cctcagcagt   | atatctatac  | ataccatcgc  | tattctttatg |
| 13501 | aacatgaggt  | ttcactatta  | ctttattagt   | agtattcgta  | gaagggttgt  | tctgatctac  |
| 13561 | aaagaacctc  | ttccatgttt  | cttcacatc    | aagagtgcg   | tacctacatt  | tatccttatt  |
| 13621 | cggatttgac  | ccagatacgc  | taccagcagc   | aatatTTTga  | tcaacaatca  | aagatacagt  |
| 13681 | ttcattacta  | tctaacatat  | atgcctccat   | tatccttaat  | acacaaatgt  | caacatacga  |
| 13741 | gcattatctc  | aattagtcaa  | tataaattat   | gacgtttaat  | gttgaaagct  | caaatactcc  |
| 13801 | tttgcttgat  | cggttagaac  | gcgcctctct   | ggtgtgcgct  | ttacaaaact  | aattttgatt  |
| 13861 | aaataaggtt  | ctactgtttc  | ttcaatatgt   | ccaacatctt  | cggatagcgc  | aatagatatg  |
| 13921 | gtgtcaattc  | caacagggcc  | tgaagtgttg   | aataaaaaatc | ttagataatt  | catatcaagt  |
| 13981 | ttattgagtc  | ccattttatc  | tacacctaatt  | tttagtaata  | cagaatcagc  | gacttcataa  |
| 14041 | gtgatttttt  | tatcatcttt  | cacttcaaca   | aaatccctta  | ttcttctgag  | taacctcaaa  |
| 14101 | gcaattcttg  | gagtaccgcg  | cgcacggcag   | gcaatttccc  | gtgcagcacc  | ctcttcaatt  |
| 14161 | tcagcagaaa  | gaactcttgc  | gcctcttttt   | ataatatcga  | ctagctcctc  | aaaagaataa  |
| 14221 | aactcaagat  | gcaaaggaat  | gccaaaacga   | tctctgagtg  | gcgcagaaag  | taatccaagc  |
| 14281 | cgtgtagttg  | ctccaattag  | cgtaaattgg   | ggtagatcta  | tccttaaagt  | gcgagtagat  |
| 14341 | ggaccttcac  | ctactaatat  | gtccaagcaa   | aaatcttcca  | tagcagtata  | taaaacttct  |
| 14401 | tcgatgctgc  | gattttaatct | atggatttcg   | tcgataaata  | ggacatcttt  | tgcatttaaa  |
| 14461 | gtggtaaagca | ctgcggccaa  | atctccagct   | ttactgagca  | atggaccaga  | agttgcgcgg  |
| 14521 | aagctgacct  | ttaattcttt  | agagacaatt   | tgtgctaaag  | ttgttttgcc  | aagtcctgga  |
| 14581 | ggaccgtata  | ataagacgtg  | atctaaggct   | tcagttctcg  | tctgtgcagc  | gtttataaac  |
| 14641 | acttttaaat  | tttgatttaa  | gtctttttgc   | ccgacaaaat  | catcaagttg  | ctcaggcctg  |
| 14701 | atggtgatat  | tgcgcacatc  | ttcagtatat   | tctttaccgc  | acgatattga  | tttcatagta  |
| 14761 | ttgaaagctc  | cttaagcgct  | atgcgaataa   | tatccttagt  | gtccagattt  | gacgatttgt  |
| 14821 | cttgattttt  | ctttatcgta  | tcataagctt   | tcactttttc  | atatccaaga  | ttgatcaatg  |
| 14881 | ctgaaagggc  | atcttcatta  | attggattaa   | agttattggt  | atttatttct  | agtttactca  |
| 14941 | ctttgccact  | caattcagtg  | atgattcgat   | ttatgagttt  | caggccaagt  | ccactcatct  |
| 15001 | tgagtgtctac | tttatcctca  | ttcataattg   | ccaaaaatag  | ctgttctgga  | gttaatttac  |
| 15061 | tcaaaattga  | cattgcagtt  | ttatagctaa   | cgccgcttac  | tttgacaagc  | aacctcaagc  |
| 15121 | actgctgttc  | ttcttcgctt  | ataaaaccat   | atagctgagt  | agtgttttct  | ctgttatttg  |
| 15181 | cataggtttc  | gataagtaat  | ttgattctac   | ttccaattgc  | acaagcactt  | aaagttttgg  |
| 15241 | ctgaaagata  | caccatatag  | ccaacatcat   | tcacattcag  | gattatgtga  | tcactgcgca  |
| 15301 | cttcatcaac  | tattccgctt  | agatttccta   | tcatTTTTaa  | cactatatag  | agttcagttt  |
| 15361 | aaatactccc  | ggatcttagg  | tcaagcaaac   | gaacattata  | acagggaaac  | gtggctaaaa  |
| 15421 | aaccacttga  | caaactccgc  | cagccccctt   | atcatgaaac  | tgaagctatt  | tatttatctt  |
| 15481 | ctctgtacag  | attaaatgac  | aaaaaaaaactc | acgtatctgg  | cgtatcatgt  | ttaatTTTTt  |
| 15541 | gcactatgtg  | caccttatgt  | cttataaaaat  | ttctacctac  | ataagctgaa  | acgcgcttat  |
| 15601 | aaagcgTTTTa | aaacataaaa  | aaacgccaac   | ttaaaacatg  | gatagtgaat  | aactagctac  |
| 15661 | cctagtgttt  | cttttgcctt  | tttttctggt   | tagtaaaattt | cttaacgttt  | ataatttaga  |
| 15721 | ttagtgtcgg  | tttaaaaagta | gctgaatcgc   | ggttattaaag | tgttttagaat | aaaaaaacgc  |
| 15781 | catacttgaa  | agtataatgt  | aagtaattag   | ccaatcatgg  | ggctTTTTtt  | gcctTTTTtt  |
| 15841 | tcgtttggta  | aattTTTTtaa | tgtttgtggc   | taaacgacaa  | ccgtcatccc  | gctgcttggt  |
| 15901 | agcgggatct  | atgctaagag  | ataccgcgga   | tgaatcgcgc  | ggtatgacgg  | ttcgtgggtg  |
| 15961 | catctcgtca  | tcccgcctacg | tgttagcggc   | taagagatac  | cgcggcggta  | tgacgtctta  |
| 16021 | gccatagatt  | acctgatctc  | accatctttc   | cggttgtttt  | atacataatt  | ctcggatttt  |
| 16081 | gaaagtccac  | tttgaataaaa | ttgctcatat   | tctttatcct  | ctagtcttct  | aaaaatctca  |
| 16141 | ggataatggt  | tactggaacg  | agtaattatt   | gaaattagct  | cttgctttgt  | ttttcttagt  |
| 16201 | aaaacctttc  | aaagagagtc  | tgttcatctg   | ggcgcgcaga  | cgatcgatac  | tcctttctat  |
| 16261 | caagtgcac   | caaagcaaaa  | cctgttgacg   | ccatatgctt  | acatggacca  | taatacacaa  |
| 16321 | atgcaggaca  | ggaacatggt  | ccactcaaaa   | gaggaccatc  | gtgcttttagt | gttactcgat  |
| 16381 | atacatttga  | tccaactacc  | tttgatttag   | cttgagattc  | attaacagat  | ataatctgta  |
| 16441 | cctttctttt  | gtcaaaaataa | tcccttcctc   | tggagcggta  | gggttctttg  | ataagacctg  |
| 16501 | tgatatcttt  | ataatacagt  | ctcatttttta  | cctccttttaa | aaccctcaat  | tttctaatat  |
| 16561 | atccttttct  | ccataaaaaat | ttattaactc   | accacaactt  | ttatatggcc  | ctgcggacaa  |
| 16621 | ttttatagt   | ctatagctaa  | ctcaagaaaag  | gtttccctac  | gtcataccgc  | gattcattcc  |
| 16681 | ataactgtat  | gaacattcat  | ttttgaaggt   | aaattgcaca  | gcaaattggtg | tcatgaaagt  |
| 16741 | agctgacact  | ggaatccagc  | cttgccgtaa   | tctcatcaag  | aacgttgtgt  | tttaacataa  |
| 16801 | aacggctact  | tttatactta  | ccaacttaat   | aaaattcctg  | gatcccagtg  | ggctttgttg  |
| 16861 | catcgctact  | tatgaaaggc  | taactataat   | taggattata  | agcaacctat  | tgaaaaatctt |
| 16921 | gttttttttgc | aatcaatctg  | atcaaatttta  | agaatagtaa  | tttattattt  | atattaataa  |
| 16981 | atttaattct  | attgaaaata  | gctaaagcat   | tgaaattctt  | gaatttttagc | cggatttagtg |

|       |             |             |             |             |             |             |
|-------|-------------|-------------|-------------|-------------|-------------|-------------|
| 17041 | agtggtagtg  | aaatctcttt  | tactcaaatt  | taggtattca  | ctgaccgttc  | ttgttataaa  |
| 17101 | taccagaata  | ataagctact  | gatattctcc  | acctttttta  | tctttaatcc  | attatagcta  |
| 17161 | gcgatgcaac  | aaagccatcc  | cagtgttgga  | cactgggatg  | acaagaagag  | ggtagttgga  |
| 17221 | taagaggcat  | tgccctcctg  | gtaggcccaa  | attgcaatgt  | ccgtacagtt  | atggattcat  |
| 17281 | tcgcggtata  | gattccgcta  | atgagtagcg  | gaatgacgaa  | tttgttggtt  | ttcaaattgt  |
| 17341 | aggtaaacct  | aagccacttt  | agctatatat  | aatagaattt  | cgctttctac  | tatctttcca  |
| 17401 | gttgttttat  | acataattct  | cgaattttga  | aaatttgctc  | catatctaata | ttctcacttg  |
| 17461 | tataaaattt  | gttttctttac | ttcgagacct  | aatctaccac  | aactttttata | tggcgtttct  |
| 17521 | ttcctgcaga  | taatttttata | aatggctgat  | ctttaaagct  | ttcgaaattt  | attacatgat  |
| 17581 | caatattgtt  | tacaacatta  | tcattaatct  | tgcattccgtt | gccctgtatt  | aaacgctttg  |
| 17641 | cagcgccttt  | tgaagggttca | aaaccgggtgt | catgtagtag  | gtctactaag  | gatatgccgc  |
| 17701 | ttgcaacttg  | ttctttttttt | atgatgtaat  | caggaagtag  | tgagctatct  | tcatttctcaa |
| 17761 | aagcagaaat  | tgcagcaaat  | tgtgcaagtt  | ccgcttcttt  | gtcaccatga  | catatttttg  |
| 17821 | tcacttctgt  | tgccaagacc  | ttttttgtct  | catttatttc  | ttgatccttt  | aaagactcta  |
| 17881 | attttctaata | ctcatcaaat  | ggcacatcag  | tgagcaatct  | taaaaaacgt  | ccaacatctt  |
| 17941 | gatcatcaac  | gttgcgaaaa  | tattgccagt  | agtcgtaagg  | cttttagcata | ttatcatcaa  |
| 18001 | gccacactgc  | tcacttttca  | gttttgccca  | ttttttttcc  | ttgtgcattt  | aataaaagag  |
| 18061 | gcatggtaag  | gccaaatagc  | tcaggtaaat  | tcaacttttt  | tccaagttca  | attccgttta  |
| 18121 | ctatatttcc  | ccactgggtct | gaccctccaa  | tctgcagacg  | acaatcatat  | tttttggtta  |
| 18181 | attcaataaa  | gtcgtaagct  | tgcaatagca  | tgtaattaaa  | ttccagaaag  | cttaagggtt  |
| 18241 | gctctctatc  | cagcctgggt  | ttcacactat  | caaaacttag  | catagcattt  | acagaaaaat  |
| 18301 | aagctcctat  | atcacgcaaa  | aaatctatgt  | attttatgtt  | atccaaccaa  | tctgcgttat  |
| 18361 | ttactatcat  | tgcaccagtc  | ttgctgtcat  | taaaagacac  | cattttctct  | aatattctcc  |
| 18421 | ttatactgga  | tgtattttga  | ttgatgttct  | ctacaggcaa  | gatgcttctt  | gctttatctt  |
| 18481 | tgaaggatgg  | gtcaccaaat  | tttgttggtc  | cacctccaag  | taagactatc  | ggcttataac  |
| 18541 | caaatttttg  | taggtgacag  | agcatcataa  | tctgaattag  | gtgaccagca  | tgaagacttg  |
| 18601 | gtgctgtgca  | atcaaaccga  | atgtatgcaa  | ctatataatt  | gctctgcaat  | aataattgat  |
| 18661 | ctagtccttc  | aatgtttgtg  | cattgggtata | ggtagcctct  | ttcttggttg  | aaatttaaaa  |
| 18721 | attcagatgc  | gtgttttcatt | ttataaaacc  | cagtctatcc  | tgtagcattat | gctgaaggta  |
| 18781 | accctaatag  | agaagccagt  | gccagacac   | tggaacttaa  | ttataaaca   | gcacactata  |
| 18841 | caacgttttc  | gatgaaattg  | catgaaaaac  | tgtagtccag  | tgtagcgtac  | tttcatgaca  |
| 18901 | ccactacctg  | tgcaggagtt  | gccttcaaaa  | ttacaacgtt  | tgtagcaattg | tgtaccagct  |
| 18961 | atctggataa  | tcaattccat  | aactcttcta  | ttttataata  | ctcccttact  | tccggcctga  |
| 19021 | atatgtgaac  | cattatgcct  | tgaaaattca  | aaaccaccca  | attgccttca  | tccatacctt  |
| 19081 | ctacatctat  | tttatcatgt  | ggcttgaggc  | tttttattac  | gtgctcagct  | aaagctttta  |
| 19141 | cgtgacggct  | tgaatcacca  | gatgcaataa  | tcatatatatt | tgcaataacg  | gttttattct  |
| 19201 | gcacatcaaa  | agttactata  | tcattgacct  | tattttgatc  | tattatctct  | tcaattgtac  |
| 19261 | ttcttatcga  | tttcatatcg  | ctaagcattg  | tttacagggt  | atatgattca  | tttataatta  |
| 19321 | tataactcaa  | atcttctaaat | atgaactatt  | ttcaaccgtt  | aaaaagggtg  | tacctgcac   |
| 19381 | tatttttatca | tcattgtttt  | agcatgtaca  | atgtatatata | ttttatgtat  | aattgagaat  |
| 19441 | agctttttac  | tagtattcat  | tatcggcaag  | actctcatct  | acttaatcgg  | ctttccagg   |
| 19501 | agtggtaagt  | ttactactgc  | aaagggaactg | tgtaaaatca  | ttgatgcggg  | gatagtaagc  |
| 19561 | aataatctat  | tcaataatat  | tatatattgat | attgttaaat  | tacaaaacgc  | tgaagttcca  |
| 19621 | gatgacctat  | gggaaaaaat  | ttttgcagtt  | agggaaaaatg | tattagcaat  | actggaaaaa  |
| 19681 | cactacgtaa  | aatcaaaaaca | ttatatattt  | acaaatgaat  | tgatagaggg  | tgatccctat  |
| 19741 | gaccaaagat  | tatataaactc | agtggtaaat  | ttaaagtaaaa | aaatggacat  | ggaaattttt  |
| 19801 | tctgtagtat  | tacattgtaa  | taatgaaaaa  | ctagtaagac  | gtgtccaatc  | agaagagaga  |
| 19861 | tatcaggaaa  | ataaaattac  | tgatccggat  | tttgctataa  | agaaaattga  | agggaaaagg  |
| 19921 | ctattttatac | ctgaggggttc | gcttgaaatt  | gataactcga  | acttgagtgc  | aaagggaagt  |
| 19981 | gcaaagaaaa  | ttgttgaaaga | gatgaagaaa  | gaaaaaaatg  | gaaaattaat  | taaaacttct  |
| 20041 | gtaacaaatc  | atttaaaaaac | agagcgtact  | cgtgggttgag | cagaaaagata | agtagcgtcc  |
| 20101 | ttgtgttggc  | ataatgctat  | ttacagaca   | aggacatgcc  | tttattggaa  | aacgctttga  |
| 20161 | tagcgattct  | tactggcaga  | tgccacaagg  | aggtgttgat  | gatggtgagg  | aactggaaca  |
| 20221 | agcagcgtta  | cgtgagttgc  | tagaggaggt  | tggtactaat  | aaagtaaagg  | ttataactaa  |
| 20281 | aagcaaggat  | tggatatact  | acaacttgcc  | tgaagaagtt  | ataccaatat  | gctggaatgg  |
| 20341 | aaaatattct  | ggtcaaaaagc | aaagggtggtt | cttaataagag | ttttgcggag  | aggatgagga  |
| 20401 | cattgatatt  | aattatactg  | ttcatccaga  | gttcaaagag  | tggcggttggc | aaggatataga |
| 20461 | tagtttagta  | gccagtgcta  | tatcatttaa  | aaaagaagtt  | tataaaacag  | tgatagaaga  |
| 20521 | gttttcttct  | ataataaaaag | cctcaacaat  | aagctcatga  | tagtagattc  | tcattgccac  |
| 20581 | ttgatttatt  | tttctgacga  | tgaataacca  | aaagtaattt  | caagggcaga  | gcaaaatggt  |

|       |             |             |             |            |             |             |
|-------|-------------|-------------|-------------|------------|-------------|-------------|
| 20641 | gtaaagggttt | tgcataacat  | atgcgtaagc  | attgacgatg | ttcctaagtt  | attaaaaatt  |
| 20701 | tcttcacct   | atgatcaggt  | ctactcctct  | gttggtatac | atccgcttga  | tgctgctata  |
| 20761 | gaaaatggtg  | agtgtataca  | tggtgatgaa  | ttagttgaat | ttaccaagaa  | ccaaaaggta  |
| 20821 | attagtatcg  | gtgaaaccgg  | gttagatfff  | tataaatctg | acaacaaaga  | caatcagaaa  |
| 20881 | aaaagttttg  | cattacatat  | agaagcgtca  | agaataactg | gactaccttt  | agttattcac  |
| 20941 | acaagaagcg  | ctgataatga  | gatgatcgat  | atgttaaggt | cagaaatgaa  | agccggtgct  |
| 21001 | tttagtggag  | taatgcactg  | ctttgcttcc  | tctaaagaac | ttgcttatca  | atctatagat  |
| 21061 | ttgggggttat | gtatttcatt  | ttctggaatt  | attactttta | aaaatgcgag  | cttactcaga  |
| 21121 | gaaattgcac  | aaaatgtacc  | acgcgagcgt  | gttttagtcg | aaactgatgc  | accatatcta  |
| 21181 | tcacctgagc  | cttatagggg  | aaaaaagaat  | gaaccagcaa | tggtgaaata  | cgttgttgat  |
| 21241 | tgtttggcag  | agttgtggaa  | tgagtcacca  | gaacaagtag | cgaaggtaac  | cacaagcaac  |
| 21301 | tttttttaggc | tgtttgagct  | ataaagaagt  | tctataaaac | cattaatttg  | cttatgaacc  |
| 21361 | taaagatttc  | accagctctc  | tcaccgagtt  | tacagactta | ttaaacattt  | cttgttcact  |
| 21421 | atcattcatt  | ttaacttcta  | ggatcttttc  | aattccgttt | tttccaataa  | ttacaggaac  |
| 21481 | accaataaac  | aactcttcta  | caccatattc  | accattaagg | taagcagcac  | atggtaatat  |
| 21541 | gcgcctctta  | tcttttaaat  | atgattctaa  | catgcatata | gctgaagatg  | caggagcgta  |
| 21601 | gtatgcagat  | ccagacttaa  | gcagatcaac  | tatttcttta | ccgccattgc  | gagtgcgttc  |
| 21661 | aactatttca  | tcgacttttt  | tctgtgtgat  | aagaccata  | tcgataattt  | gagtaagtgg  |
| 21721 | aactccagca  | actgaagcac  | aattgattag  | tggtaccata | gtgtcgccat  | gtcctccaag  |
| 21781 | cacaaaagca  | gatatatctt  | caactgagat  | atttaactca | cttgcaagaa  | agtaacgaaa  |
| 21841 | acgggaagaa  | tcaagcactc  | ctgccatgcc  | aacaatcata | ttagttggaa  | ggtttgaaaa  |
| 21901 | tttatgcacc  | actgaaacca  | tggcatccaa  | agggttggta | accactatta  | caaacgcgtt  |
| 21961 | tggagaatat  | tttttaatat  | tttcgccaac  | ctccttcatt | acttttagcat | tggtttgcag  |
| 22021 | gaggtcatcc  | ctgctcattc  | caggttttct  | agcgatgcca | gcggttatta  | taattgcatc  |
| 22081 | ggagtttttt  | atatcttcat  | acctatttgt  | gccagtaata | ttgacattaa  | atccatcaat  |
| 22141 | aggggatgat  | tctgctatgt  | cgagtgcctt  | accttgtggt | attccatcac  | taatatcaag  |
| 22201 | taaaacaaca  | tcaccgagtt  | cccttagtgc  | aatcatatgg | gtgagagtgc  | caccgatatt  |
| 22261 | tcctgcaccg  | attaaagata  | ttttttttct  | ttgtactgtc | atcttctact  | cctttgtatt  |
| 22321 | tacttttatg  | gtttttacct  | cccaaggcga  | taagctatca | aacatacgaa  | aatcttgctg  |
| 22381 | taaatctata  | ggattatata  | caaccttttt  | tgtctctata | tcatatctta  | cttcctcata  |
| 22441 | accagtgaga  | gggaaatctt  | ttaacattgg  | atgacctttg | aatccatagt  | ctgttagaat  |
| 22501 | cctacgcaaa  | tcagggtgat  | cagaaaactc  | tattccatac | atatcaaaca  | cttcacgctc  |
| 22561 | aaaccacaaa  | gccgtactaa  | atatcttcgc  | tacacttgga | ggcatgtcgc  | tttcacataa  |
| 22621 | ctgaagcttt  | atgtgtactc  | taatattatg  | cacaatgctg | agcagattgt  | atattagctc  |
| 22681 | gaaacgcttc  | tctctatattg | gatagtcaac  | cccaaaaata | tcaactaata  | gttcaaacct  |
| 22741 | acactttttca | tcatcacgta  | gaaagaatag  | gtgcttttca | atttcatcta  | aagttgaata  |
| 22801 | tattacaata  | atgccatcat  | ctttttgaat  | gcactcgcat | ttggtctttt  | tttgtatata  |
| 22861 | ctttgcagtt  | ttatccattc  | cgagtccggt  | ttattttggt | ttgtaggcat  | agcattccat  |
| 22921 | atagcaacgc  | ctcagcgggt  | ggtgggcac   | cagggacata | cacgtcaact  | ggcacaaattc |
| 22981 | tatcacagcc  | ttggaccact  | gaataagagt  | aatggtaata | accaccacca  | tttgcacaac  |
| 23041 | ttcccatgga  | aataacatac  | ttcgggtctg  | ccatttgatc | ataaaccttg  | cgcaatgctg  |
| 23101 | ctgccatttt  | attagttagt  | gtgccagcaa  | caatcatcac | atctgattga  | cgtgggcttg  |
| 23161 | cacgaaacat  | tataccatat  | ctatcaagat  | cataacggct | ggatgcagta  | tgcatcatct  |
| 23221 | caactgcgca  | acatgcaaga  | ccaaatgtca  | ttggccacaa | tgaaccagac  | cttgcccaat  |
| 23281 | tcattacata  | atctgtttaa  | tcaccaaatt  | tagtgacaag | aaacccttct  | tttttataac  |
| 23341 | gaccccgctc  | atcattagat  | agaatttgat  | ttgtcataaa | ctactcccac  | tctaattgcac |
| 23401 | ctttacacca  | ttcatagata  | aaacctatag  | tgagtattgc | aagaaatacc  | atcatagacc  |
| 23461 | aaaatccacc  | atagcttatc  | ttagataaaag | aaacagccca | aggaaaaaga  | aaagcaattt  |
| 23521 | ctaagtcaaa  | tattataaat  | aatattgaaa  | ctagataaaa | tttaatgtca  | aaattttttc  |
| 23581 | ttgcactgga  | tagtggattg  | aagccacact  | catatgtgga | aagcttttca  | ccatctggct  |
| 23641 | tactcactgc  | aagaaacata  | ggcaatatac  | ctaaagcaaa | agatactaca  | attgatacgc  |
| 23701 | agataaagat  | tactatgggt  | aaatattcgc  | tcatTTaaca | aaacataata  | cactatgagt  |
| 23761 | ttacatgctt  | tcctaacttt  | ttaccaccta  | aaatatgcac | gtgaaagtgt  | ggtacaacct  |
| 23821 | gctctccatt  | ttcacccgtg  | ttagtgacta  | atctatatcc | tgttttttct  | agatttatatt |
| 23881 | tgtgtgctat  | ctctcttaca  | gttttgaaaga | aatccgctat | ttcctcttca  | ggagctttta  |
| 23941 | gaatgaaatc  | atcatatgaa  | atatattgat  | tttttggtat | aactaaaata  | tgaactgggtg |
| 24001 | cgtcagggta  | cttatcatga  | aaagctagta  | catttttcat | ttcatgtacc  | ttctcacaag  |
| 24061 | gtaactcacc  | tcttaatat   | tgagcaaaga  | tgttatcgct | atcataaact  | tcattgctca  |
| 24121 | tatttttaaga | gcgacctttc  | cctcttttct  | cgttttttct | tacattaggt  | gtagatagtg  |
| 24181 | gttttatcgc  | ttcaccagaa  | gcactttcaa  | gatttaaaga | gcttacaagt  | tcccttactt  |

|       |             |             |             |             |             |             |
|-------|-------------|-------------|-------------|-------------|-------------|-------------|
| 24241 | ttaccatgtc  | ctgctgttct  | ttcaaaaagg  | gttctattcc  | acttaccctt  | tttccagtaa  |
| 24301 | taactcctgg  | ttgtaagtga  | tacatatccc  | caggaacagt  | tagactatga  | tgtctttcct  |
| 24361 | ctatTTTTTT  | agcttcactc  | ataatactcc  | cctataactt  | atTTTTgc    | tccacaactt  |
| 24421 | tgcgacttac  | ctggctttat  | agcttcttgc  | gcccatTTTT  | tctcacctga  | agctatagtt  |
| 24481 | tctgaaggct  | gaccaacatc  | agacttcaca  | actttgtctg  | atgactgctt  | ttgattatca  |
| 24541 | tattccttat  | acaatttttc  | tgcaatacca  | ttcagcaatt  | ttaagtctgt  | atgaatttta  |
| 24601 | aattctccac  | cagtaattcc  | tgccagcttc  | ttaaggctgc  | cattaatgct  | atcagcaatt  |
| 24661 | ccttgaagag  | caagcttttt  | tatctcctct  | ggactctttc  | ctttatTTTT  | agagtcagtt  |
| 24721 | ttaatgtctt  | caattatttt  | tttaacatca  | acttcaatta  | caattttatt  | ttcttctcta  |
| 24781 | aaaatagtta  | cattcggtta  | atcttttttt  | atTTtatcta  | attgctctgg  | gctcaaataa  |
| 24841 | ggtatatctc  | ccgtaagagt  | ccttgatgct  | aaaaaactta  | cctttcctgt  | ccctttcttt  |
| 24901 | tgctctgtta  | tttgtagcc   | aagatcctta  | ctagcttggt  | tggtttttat  | gggtggatca  |
| 24961 | tattcttcat  | gtgggttgcc  | aataatagaa  | cgcccgccat  | tttttatgtc  | gtgccgcatt  |
| 25021 | tcacccagg   | acttaaacca  | attctttggc  | catataggg   | atattgcacc  | cttgactagg  |
| 25081 | acttttacac  | ctctaccag   | aaaactccct  | actcccgagg  | ctgcattacc  | aactttagct  |
| 25141 | agtatagaag  | tagatttttc  | atTTtctctt  | gttaacatac  | atacctccaa  | ggtactttct  |
| 25201 | ataactaaat  | acattttaat  | tatagacgaa  | aaaatttaaa  | cttctatatc  | cattataaga  |
| 25261 | tagaattata  | gggattgcaa  | ccattatTTg  | cacattgtct  | aaaacatgta  | gtattctcgc  |
| 25321 | tacttttatt  | gttcaattta  | ttataaagaa  | tactctaaat  | tatgttttaa  | tggaaacaaa  |
| 25381 | ataatatcat  | tgatgcaact  | ggcggaagag  | acgtaaatgg  | ttgtaattgg  | atacatagct  |
| 25441 | caaataatttc | aacggacaca  | agaagcataa  | aaaaagggtg  | tttattttatt | gcactcaagg  |
| 25501 | gaaggaattt  | tgatggccat  | aattttttgc  | atgaagcgtt  | tttaaaaggg  | gctgtcgtctg |
| 25561 | caatagtaag  | tgagggtaaa  | tataaaaaatt | tccctctcat  | tattgtacaa  | gataccctga  |
| 25621 | aagctttgca  | cgatatggca  | tcatactaca  | ttagaaatgt  | tcttattgac  | gctaaagtta  |
| 25681 | ttgcagttac  | aggcagtgtc  | gggaaaaacc  | actacaaagg  | atatgtctaca | cactgtttta  |
| 25741 | tcgcaatatg  | gagtgtccca  | tgcaaacgaa  | ggtaacttaa  | ataataatat  | aggggtgcct  |
| 25801 | ttgacaattc  | taaaagctcc  | aaaaaactgc  | cagtacttaa  | tccttgaaat  | gggaatgaat  |
| 25861 | aaagctgggtg | aaataaaaaga | attatcaaag  | attagtaatc  | caaataattgc | agttattacc  |
| 25921 | aacatcgaac  | ctgcacatac  | tgaaaatttt  | tcatcactat  | ttgacgttgc  | acaagcgaag  |
| 25981 | ttagaaattc  | tgtatggtat  | gaaaaataac  | ggtactttgg  | ttttaagcag  | agataataaa  |
| 26041 | tattatgatt  | atctctcatc  | acacgccaat  | agaaatgtaa  | taagcttcgg  | taaagataaa  |
| 26101 | aatgctgaag  | tttgtttact  | aaacttaata  | agaaacgatg  | aatcttctgt  | catttcagca  |
| 26161 | ctatcttctg  | tcacccagct  | gcttgactac  | ttggatccag  | gaagttcaat  | tgcaaatgag  |
| 26221 | catatcagac  | ggttgtataa  | taaagactgg  | attccagcgt  | cacgcgctgg  | aatgacatca  |
| 26281 | aaccgagttg  | ctaatagatt  | aagtttaaaa  | atcaggctga  | gtgataatca  | aattataaac  |
| 26341 | tgtaattttac | gtgtacaagg  | tgagcatttt  | gcttattcgc  | tacttgctgt  | tgcagcagtt  |
| 26401 | gtgcaaagcc  | tcggacttga  | tttatcaaaa  | ttaccacttg  | cacttaagaa  | ttttagtgt   |
| 26461 | gcgaaaggta  | gaggcaatat  | tcataagatc  | aaatacaata  | gaaaatatat  | acattttaatt |
| 26521 | gatgactcct  | ataacgccag  | ccctgcttcg  | atgaaaactg  | caataaaaaac | tttgagtaca  |
| 26581 | tattctaatac | agagaaaagt  | agctttgctt  | ggtgatatgt  | tggaacttgg  | tgatgaaagc  |
| 26641 | atagagtttc  | atacagatTT  | ggttaagatt  | atcacagaaa  | ataatataga  | taaagtttat  |
| 26701 | acagttggta  | aattttatgtt | agaattgcat  | gagcttttgc  | cagataatat  | aagaggcacg  |
| 26761 | cattttaatg  | attctaataca | attgaaaagt  | gatttagcta  | acattattca  | gaataatgac  |
| 26821 | gcaattctag  | ttaaaggctc  | acgaggaatg  | aaaatggatc  | ttattgtacg  | ggaattcgta  |
| 26881 | ataaaaatatt | aagcgaaaatc | attgtatttaa | tttacagtaa  | caaattatta  | ggaactttaa  |
| 26941 | ttgtgacaaa  | acgtgtaatt  | atTTttgggtg | gaacgggggtt | tatagggaaa  | cacatcgtaa  |
| 27001 | gacgcttggc  | agcagaagga  | tatttaataa  | agatattcac  | tcgtaatcag  | gaaaaagctg  |
| 27061 | cttgttttaa  | attgtgtggc  | aatttaggac  | aaatatcaat  | atttaaaaggc | gatttttttg  |
| 27121 | atgaaaaatc  | agttctggat  | ggtatggaag  | aatgtgatgt  | agctataaac  | ttagtgggaa  |
| 27181 | tatttatatga | agcaaaaaag  | cacgattttt  | acgctgttca  | cgttaaaata  | gctgaaagga  |
| 27241 | tagcaaaaagc | tgcaaaaatg  | aaaaatgtac  | ctatgatgat  | acatttttct  | gctatgggaa  |
| 27301 | tagaaaatag  | caagttgtca  | aaatatgcca  | aaagtaaatt  | ggaagggtgaa | aaagctgtaa  |
| 27361 | cttcagcatt  | tcaagaagca  | ataataatta  | ggccaagcct  | tgtatttgggt | aaagaagaca  |
| 27421 | acttcttttaa | taaatttgca  | agattagcaa  | ctattcttcc  | tttcttacca  | ctaattggca  |
| 27481 | atggaacaac  | taaatttcag  | ccaatatgtg  | taacagactt  | agctgaagtg  | gtatatcgta  |
| 27541 | ttatcagttt  | taataagcaa  | gacaagaaaa  | tttataacat  | gggtggacca  | aaggtttact  |
| 27601 | ctttcaaaag  | cttattgaag  | tttattctga  | atgttactaa  | cagaaagtgt  | ttgttgggtca |
| 27661 | atgtatcttt  | tccaatggca  | aagttaatag  | ctttcttttt  | agaaaataaa  | attatttcta  |
| 27721 | tgctgctaaa  | accaataacc  | ggagatacga  | accctatgct  | tactcaagat  | caggtgaaag  |
| 27781 | ttatgatgaa  | tagttcaatc  | gaaaagtcag  | ttgaccttga  | aacaatgaag  | gttcgaccat  |

|       |             |             |             |             |             |            |
|-------|-------------|-------------|-------------|-------------|-------------|------------|
| 27841 | tagcaattga  | aaatgtggtg  | ccagagtact  | tgaagattta  | tagaaagtat  | tgataaaaga |
| 27901 | gtgtgcccgg  | tgggattcga  | acctacgacc  | cacagcttag  | aaggctgttg  | ctctatccag |
| 27961 | ctgagctacg  | ggcacacaac  | atatataaaa  | tgcttcttag  | tacaagtga   | gtcaagtact |
| 28021 | tcgtgtgaat  | atgatgttta  | tcttgcgaca  | ccttgtcatt  | gcagttgtgt  | gtcgcgcgct |
| 28081 | gccaaaattg  | gatgcgagaa  | gtctatttat  | tttagaaaat  | attatataga  | aacttacttg |
| 28141 | acacccttcg  | ccagcgccct  | tatcatgata  | gtgaagctat  | tgtatttgct  | ttcgccaatc |
| 28201 | tgcagattaa  | aaggtaagga  | ttacttaatg  | tatcggcgtc  | ttatgttcaa  | ttttttgcag |
| 28261 | tatatagata  | ctgtatgtct  | ttacaaaact  | tcatctacat  | ctagattttt  | atctaaataa |
| 28321 | gctgaacgcg  | cttataaagc  | gttacaagac  | atcaaaaaat  | gccaatactc  | gacagagata |
| 28381 | gtaaaagact  | agctaactcg  | gggattcctt  | gtcttttttt  | ctgcttagta  | aatttcttaa |
| 28441 | acatttgtag  | cgtaagttag  | ttgcaattaa  | aagcggctga  | atctcgcttg  | tcaagcgttt |
| 28501 | aaaacataaa  | aaacgccaat  | attttaaagc  | ggataataac  | cccagggctt  | cttttgcctt |
| 28561 | ttttttattt  | ggtaaatttc  | ttaatgttta  | tggctaaacg  | acaatcgtea  | tcccgtactt |
| 28621 | tgtttagcggg | atctagagat  | accgcgaatg  | aatcgcggtg  | tgacggtttg  | cggcggcatg |
| 28681 | acctcgtcat  | tcccctacgt  | gttagcggga  | tctagagata  | ccgcggcggt  | atgacggttc |
| 28741 | gcgcgggtggc | atgacctcgt  | catcccgtcg  | cttgtagcg   | gctgagatac  | cgcggcggta |
| 28801 | tgacgggtgta | gatgatggtt  | aagtaattcg  | tcatcccgtc  | gcttgtagc   | gggatctctt |
| 28861 | gttagcgccg  | cggcggtatg  | acgtaggatt  | gttgctattc  | cgctacttgt  | tagcggctga |
| 28921 | gataccgcgg  | cggtatgacg  | gttcgcggcg  | gcatagtaat  | tcatcatccc  | gctgcttggt |
| 28981 | agcgggatct  | agagataccg  | cgacgtctca  | cctatagcct  | tcagtgtctc  | ttttttgtc  |
| 29041 | atcccagcgt  | cacgcgttgg  | tttcaacatt  | atatcatgaa  | ctttctaaaa  | ttcattgaac |
| 29101 | tgtgctttca  | aacggtagtg  | ccggggtgtg  | agtataacga  | ttatcagtat  | ataaaagtca |
| 29161 | tagcagatag  | gctggaagca  | gcgagcgctg  | gtgaagtga   | acgaataata  | ttcaatatgc |
| 29221 | ctccgcgctc  | gatgaagtcc  | atgtgcataa  | gcgttgctg   | gcccgcattg  | atactgggaa |
| 29281 | accaaccaac  | tgcgagaata  | atagttgcaa  | gttattctca  | gcggctcagc  | gaaaagcact |
| 29341 | cgctcgacac  | caggtgcgtg  | atgcagtcta  | gttggtatag  | agcgctattt  | ccagagatag |
| 29401 | aactatccaa  | agaccagaat  | acaaaatata  | aatttcaaac  | agtgcagaga  | ggatacagaa |
| 29461 | tcgcaacatc  | agttggtgga  | acactaactg  | gtgaagggtg  | tgattttatc  | attgtggacg |
| 29521 | atccgctcag  | ttctgctcaa  | gctttgagtg  | aaacgcttag  | aaagcgtgcc  | ataaactggt |
| 29581 | ttgatcagac  | tttagtaacc  | aggctgaacg  | atagaaaaaa  | aggagtcata  | gttcttgtaa |
| 29641 | tgcacaggct  | acaccaggag  | gacttaactg  | gacaccttct  | ctccaagcca  | aaaaacatat |
| 29701 | ggcatcatat  | ttgtttgcca  | atgattttctg | aaaataagca  | ggttattttat | tcaatcaaaa |
| 29761 | agccaatgcc  | tcccgttcct  | gtcatccgag  | tagctcagca  | ctgtgcgacc  | aggcgattat |
| 29821 | ataataaacc  | agcgtcacct  | gtaaggatat  | tatatccaag  | agaagaaagt  | cagttgctat |
| 29881 | atcccctaga  | tggaggaaaa  | gaagaaattg  | agatgataaa  | ggttgaactt  | gggagttacg |
| 29941 | cttttgctgc  | tcaatatcaa  | caaaaccctc  | tgccgctttc  | aagtgggtata | attaaaccag |
| 30001 | agtggttgaa  | acgctataaa  | aaatttcctg  | ataatctctc  | gcatataaca  | caaagttggg |
| 30061 | atactgcggt  | ttcaacaagc  | gacatgagca  | acttttagtgt | ctgcaccacc  | tgggcaaaaa |
| 30121 | tagataataa  | attctatttta | cttgatgtat  | atcgcgcaaa  | gcttgagtat  | ccaaagctta |
| 30181 | aagaacaggt  | tttgtcacta  | gctgcaagat  | ggacgccaca  | cgcaatttta  | atcgaagcaa |
| 30241 | aaacaagtgg  | tcaacaattg  | gtgcaagagc  | taaagacaaa  | cagtgattta  | ccgattattg |
| 30301 | aaatagtgcc  | acatgatgac  | aagctcactc  | gatttcatca  | aattgttccg  | attatagagt |
| 30361 | ctggcaaggt  | ttttctgcca  | catcaagcag  | tatggctgaa  | cgatttttag  | tatgagattt |
| 30421 | taatgtttcc  | tgaaacgcgc  | cacgacgacc  | aagtggacag  | taccgtgcaa  | tatttgcagt |
| 30481 | gggtgagaaa  | cagtacctcc  | agggttgtag  | ttatacgagc  | attgtgattt  | gagtctacca |
| 30541 | gtactgggat  | gacagctagg  | agacaaccgt  | catcccgtca  | cttgtagcgc  | ggatctatgc |
| 30601 | taaaagatac  | cacggcggtg  | tgacgtagaa  | ctgctgcttg  | ttagctgatg  | agataccgcg |
| 30661 | aatgaatcgc  | ggtatgacgg  | ttcgcggcag  | catgacggta  | agctcgtcat  | cccactactt |
| 30721 | gttagcggga  | tctcttggtt  | gcggatgaga  | taccgcgaat  | gaatcgcggt  | atgacgtagg |
| 30781 | actgctgtca  | ttccagtgct  | agctactttc  | atgacaccgt  | ctactttgta  | aaattcacia |
| 30841 | gaaccattaa  | aatatttttt  | tacttttcat  | tgtataattt  | tcaacatatt  | atctttaagt |
| 30901 | actaaaataa  | ttaacaatat  | ggcattatta  | atagttgaat  | cacctgcgaa  | agcaaagaca |
| 30961 | ataggtaaat  | atttgagtaa  | agagttcaaa  | gtagctgcat  | cctttggaca  | tgtgagggat |
| 31021 | cttccagcaa  | aaaacggttc  | tgtcgatccg  | gataatgatt  | ttgctataaa  | gtatgaaacc |
| 31081 | attgaaaaag  | cagaaaagta  | tataaaaagag | ctagtaaaaag | ccgcaagcaa  | aacatcagat |
| 31141 | atataatctt  | caacagaccc  | agacagagaa  | ggggaagcaa  | tggcttgga   | tgtgatagag |
| 31201 | acattaaaag  | aaaagaaagc  | aatcagtaat  | gaaaaacaac  | tttatagagt  | agtctttaat |
| 31261 | gagataacaa  | aaagagcagt  | acaagaagca  | ataaaaaaat  | cacgtgaaat  | taatatggat |
| 31321 | ttagtgcggt  | cacaacaagc  | acgtagagct  | ttggattatc  | tagttggatt  | tagtttgtca |
| 31381 | ccactgctgt  | ggacaaaatt  | gtcgggaagc  | aagtctgcag  | ggcgagtga   | gtctgttgca |

|       |             |              |             |             |             |             |
|-------|-------------|--------------|-------------|-------------|-------------|-------------|
| 31441 | ttaaagatta  | tatgcgaacg   | agaagatgaa  | attagtaa    | ttataacaca  | ggagtattgg  |
| 31501 | agcataaaag  | cagaaatgca   | aaatagcaaa  | gatgaggctt  | tttttgctat  | gctaagccac  |
| 31561 | tatgacaata  | aaaagctaga   | aaaatttgat  | attaagaatg  | aagaagaagc  | aaagaactta  |
| 31621 | gtcagggaga  | ttgaatcaag   | gcaatatgct  | gtaagcacag  | tagaacgcaa  | gcaagttaag  |
| 31681 | agaaacccgc  | ttcctccgtt   | tattacttca  | agtcttcagc  | aagatgcagt  | gaataaactg  |
| 31741 | tattttta    | tgaaaagtgt   | tatgcgcata  | gcgcaaaatt  | tatatgaagg  | tatcgatatt  |
| 31801 | ggtagtgaaa  | ctgtagggtt   | gataacttac  | atgcgtacag  | atgggtttca  | tattgcagat  |
| 31861 | gaggctataa  | actcaattag   | agggtcaatt  | aagtcattat  | atgggtgataa | atatttaccg  |
| 31921 | cagtctcctc  | gtaaatatgt   | aaaaaaggtc  | aaaaatgctc  | aagaagcaca  | tgaagcaatt  |
| 31981 | cgtccaactg  | atatcaatag   | aacgccgggt  | agtattaagg  | attacttaac  | gccagagcaa  |
| 32041 | tttaaattgt  | atgattta     | ctggaaaagg  | accattgcaa  | gtcaa       | gtcggcgatt  |
| 32101 | cttgatcaag  | tggtagtcga   | aattagttct  | actgaccaga  | aagtaattct  | gcgagcaagt  |
| 32161 | ggatcaagta  | tattctttga   | tggtttttat  | agagtctacc  | aagataacat  | agaagccgaa  |
| 32221 | aatgaaggcc  | tgctacctgc   | catgaaggaa  | ggggaagcgt  | gtaagctgat  | ttcagttgag  |
| 32281 | ccaaaacaac  | atttcactca   | accgccacct  | cgttatagtg  | aagcaagtat  | cgtaaaaaaa  |
| 32341 | atggaagaaa  | tcggtatagg   | tcgaccatca  | acttatgcaa  | caattatttc  | ggtattacaa  |
| 32401 | gatcgtgagt  | acgtttcatt   | ggatagcaaa  | aggtttattc  | caagcagccg  | cggtaaaatc  |
| 32461 | gttactatat  | ttttagaaac   | tttttttcag  | cgttgtgtag  | agtatgattt  | cacagcacia  |
| 32521 | atggaagaga  | agcttgattt   | aatttcaa    | ggacatgcag  | attggaaaaa  | agaattaggc  |
| 32581 | cacttttggg  | tgccattttt   | tggtcatgta  | aactctgtca  | agcaa       | gcatgatgaa  |
| 32641 | gttttcagcg  | gcattcacga   | tttggtaatc  | gattggtttt  | gttcagaaga  | aggaaaaaaa  |
| 32701 | gagatgaata  | caaaatgcc    | tgcttgctct  | gatggcatat  | tgaaattgaa  | ctttggaaaa  |
| 32761 | gccgggggtg  | tccttggtatg  | ttctaattat  | cctgaatgca  | accatacaaa  | agaaattacg  |
| 32821 | ggcagtaacg  | acaattcaga   | atatccaaaa  | agtttaggta  | tagatgatata | aacaaaccaa  |
| 32881 | gaagtgatga  | tcaaaaaggg   | tccttttgga  | ctttatctgg  | agtttaataa  | cgagttaaaa  |
| 32941 | aagaaaaaaa  | cgggtttccat  | accaaaagat  | ataaatgtta  | atgagattga  | tctgagcacc  |
| 33001 | gctactcagt  | tactttcctt   | gccaaaagta  | atcggagaa   | accctgaaac  | cggaaaggaa  |
| 33061 | gtaaaaatag  | gccttggg     | atttgggtac  | tataattttct | atgatggtag  | atacttttct  |
| 33121 | cttaagaaaa  | gctccaaaga   | ggtgctgaat  | agagaattga  | gcgaagttgt  | acaaattatt  |
| 33181 | gcaaacagtc  | catgcaaaga   | gttaaaatct  | ctcgggggta  | atgaaaagg   | aaaagaagtt  |
| 33241 | tttatctgca  | acggtaggta   | cggattctat  | ataaaatgcg  | gtaaaacaaa  | cgttgctttg  |
| 33301 | ggcaagagtg  | cagatatattga | aagtatagat  | ctggagaagg  | ctttagagtt  | gattaagaat  |
| 33361 | aagaagtaga  | cttttattga   | aatattaggt  | aaagttaaaa  | tatactctaa  | taatgcggtg  |
| 33421 | ggataaatga  | tatttttacac  | acagggcgac  | actccagctt  | tatgtagggt  | agattacacg  |
| 33481 | gatgtaagta  | agtttagtagg  | cataccaaat  | atcacaagac  | ttgatttaac  | tgagtgcag   |
| 33541 | attagtgtta  | aagatgcaaa   | agaattagcc  | aaacttacaa  | atcttacttc  | acttcattta  |
| 33601 | ggtaagtgc   | agatttagtgt  | tggagttgca  | aaagaattaa  | ccaaacttac  | aatcttact   |
| 33661 | tcactcaatt  | taattgggtg   | caagattagc  | aatgaagttg  | caaaagaatt  | agataaactc  |
| 33721 | aaaaaaaaatc | ttccttccact  | taatataatt  | ggttacaaga  | ttagcggtaa  | agggtgcaaac |
| 33781 | gtaaaattgc  | aggatgaggt   | atcaaaactcg | caagaaaaac  | ttaaaagcag  | tagcaaatac  |
| 33841 | tataattgtg  | gagcaacagt   | tggttttagtt | attggtctag  | ttgcagcata  | ttgttttaggg |
| 33901 | gctgctgctt  | taactcctgt   | tggtgtttct  | gttgccagcgt | ttattgcata  | tgctgtggtt  |
| 33961 | ggcgcgttac  | tcggagcttg   | ggtgggttat  | gctgtgagta  | catatcttga  | aagcactgaa  |
| 34021 | ttaaacaata  | tgcaaccacg   | aaggagttgt  | tgaagatccg  | tgtaaaattc  | tagtacagga  |
| 34081 | gcttttttct  | aatgctaaag   | tttacagttg  | aaacaaacca  | cctggccacg  | tggaactgat  |
| 34141 | ttcagtttat  | cagttgaaac   | ttgatttgag  | cagagtatgc  | attttattgt  | gttgcttgga  |
| 34201 | gtaagtgagt  | tatcaacagc   | aattctatca  | tcaaaaacaa  | aacactcacc  | ttccaatta   |
| 34261 | tcatttttat  | tatgagtttt   | ttcgaggtaa  | gaaagaatgc  | cgcctttcag  | gtggtacaca  |
| 34321 | tcgttaaatc  | caagattttt   | catgtacgct  | gttgattttt  | cgcatactaat | tccaccagtg  |
| 34381 | cagtacatag  | ctactttcag   | gtcttttactc | tcagaaaaatg | actctgtcca  | ctgaggaaac  |
| 34441 | tcacggaaac  | attgtgtgtg   | tggaattaatt | gcattcttaa  | acttgccata  | tttcaactca  |
| 34501 | tactcgtttc  | gtgtatctat   | tactaaaacg  | tcagggttgag | aagtaaaatc  | atcccaatgc  |
| 34561 | tctggatcaa  | catattttacc  | cttcagggaa  | atatcaagat  | tgcttacacc  | aagattcaca  |
| 34621 | atctctcttt  | ttaatttttac  | cttcactcttg | ctaaatgggt  | gatattctgc  | tgcaactctct |
| 34681 | ttccatgtaa  | ggtcccttag   | cctataatca  | gaacgtagaa  | aatcgaatat  | tttatcaatt  |
| 34741 | gcgtttcttt  | caccagatat   | tggtgcatta  | acaccctctt  | ctgcaaggag  | tatagtgcc   |
| 34801 | tttaactcaa  | cggtgttgca   | tgtagctttt  | atttcgtctt  | tcatgtcata  | ataattagaa  |
| 34861 | agttctacaa  | aatgatagaa   | agttgcaatg  | acgaagctca  | tgattattca  | cttatcaact  |
| 34921 | aaaaacatga  | tatacaaaat   | tataaagata  | ttcaatagta  | cggctgttaa  | ttactggata  |
| 34981 | tcttcagttt  | ttacatataa   | catttttaata | taaaatatag  | attcaaat    | atgtttttaa  |

```

35041 gagtattttaaa aaatatatttc ttattttctag taagtatatatt attcgtctgt ccaatatttat
35101 cattaatatc aattctatatt acagatacag caaattccgg atgggtaatc agcacacttt
35161 tccctgaata tatactgagt acgttaattt tgatgatagg agtgggggga atatctttca
35221 tatttgaggt aattccagcg tggctcacca catttttttc atttcctgga agtaaaattt
35281 ttgagattgc ttgtttcttt ccgatatcga ttcttgata tatagtagcg ttcgtctatg
35341 taaatacact agaattttca ggtccagtcg agagctcatt aagagacatt ttagagtggga
35401 gcaaaggtga ctattgggtt cctgaaataa aatccctagg tgggtggaata ttagtaatgg
35461 gatttagttt atatccatac gtttatatgt tagtccgctc aagtctaaag aatgttagta
35521 actcagtcac tattgcatca acacttgggt tctcctcatt gaagagcctg ttttctgtca
35581 tcataccctc catacgccca tcgattatag ctgggttgctc tttggtacta atggaagtaa
35641 ttacagattt cggcacacca cagtttcttg ctatcgatac ttttacgacg ggaatatac
35701 gcacctgggt tttactgcat gacaaatatt caactactgt tttagcagtt gcagaattaa
35761 ttttcgttgt gatactaata gctatcgaaa aaaaactaca aaaaaaagga atatcttact
35821 cttcaatcaa taccaattca gattatcaca ataaacggag tataagtggc gctataccgt
35881 tgatctttgc ttatcttatg tgtgtattgc cgatattaat aggtttttatt ttgccaatga
35941 ttccgctcat atattggagc atagagaagg ggtttttcat atacgaagca agattctata
36001 acataatagc aaatagcatt agtttatcat ttatcaccgc attaatctca attagcattg
36061 caataatgat tggatatacg gcgcgtaaaa ataaggtaat caacaatata gcgcgtctca
36121 tttcttttag ctacgcaatt ccaaagcaa ttatcgcaat tagtataata atatttttaa
36181 gcagaatata ctctttcatt actcaatatg ttgtggaaat tagcttagta ggaactattg
36241 gcgcattagt ttactcatat ttattccgtt tttttgctat atctttcaag gcggtagagt
36301 cagggctcaa aaaaacacca aatgaaattg agtggactgc atataccatg ggtcacggac
36361 ctattttcac atgtttgaat gttcatatcc ctctcatcaa gaagagtata ttatcgggat
36421 ttttgctcgt atttatggat actatcaaag agctcacagc aacactcatt ataagaccat
36481 ttaattttga aactatatca actagaatat atgaacttgt aagcgatgag cgctatagag
36541 aagctgcccc attttcgtta ataatagtta taataggctt aatctctaca ataacttat
36601 ttacacttga tgataaggat aaaaaataaa cgtaactgtt cacagatttc cacttaattc
36661 ttcaatctca ctaatagaaa ggccagtaaa cttaacaata gtgttgacat caacattatt
36721 agccagcatt gcttttgcca cttcaatttt cccttcaatt ttccctttct ctataccttt
36781 ttgtatacct ttctcttcag caagatcaag tctgtattca agaatagctt cttctttgcg
36841 tagatccatt atcctttctt cataggctac taaatctttt tcgttccaac gaaactgtc
36901 taattcatca tatgctagct ttattattgg cgctttttct gctatctctt ttaagtctc
36961 ttctgttggt tcttctgcgt atttaaaaaa gaaacaccac ctttctacta tactttctaa
37021 ctgctctact ttattttttg cgaatttagg caactcaata aagacaaact gaaaatcttt
37081 taagtaatgg cgttaggttt ttatatcacg tatattgtga gtagaaatat aatcaacttc
37141 ttcaggaagt aagttacaat ttgatatagc aataaagaag actttcttta aatcaatgta
37201 gttgccagat ttatctaatt gtcttgagta ggcttttagca gcatagagtt gtgcgcgctt
37261 ttcaaagccc ttgtctctag cgagctgc

```

//

```

LOCUS      JAQZAU010000046                8587 bp    dna        linear    ENV 17-MAR-2023
DEFINITION MAG: Wolbachia pipientis isolate wEsol contig_32109, whole genome
            shotgun sequence.
ACCESSION  JAQZAU010000046 JAQZAU010000000
VERSION    JAQZAU010000046.1
DBLINK     BioProject: PRJNA929258
            BioSample: SAMN33142973
KEYWORDS   WGS; ENV; Metagenome Assembled Genome; MAG.
SOURCE     Wolbachia pipientis (insect metagenome)
ORGANISM   Wolbachia pipientis
            Bacteria; Pseudomonadota; Alphaproteobacteria; Rickettsiales;
            Anaplasmataceae; Wolbachieae; Wolbachia.
REFERENCE  1 (bases 1 to 8587)
AUTHORS    Fiutek,N., Couger,B.M., Roy,S., de la Torre,J.R. and Connor,E.F.
TITLE      Genomic assessment of the contribution of the Wolbachia
            endosymbiont of Eurosta solidaginis to gall-induction
JOURNAL     International Journal Molecular Sciences
REFERENCE  2 (bases 1 to 8587)
AUTHORS     Fiutek,N., Couger,B.M., Roy,S., de la Torre,J.R. and Connor,E.F.
TITLE      Direct Submission
JOURNAL     Submitted (10-FEB-2023) Biology, San Francisco State University,

```

```

1600 Holloway Ave, San Francisco, CA 94132, USA
COMMENT ##Genome-Assembly-Data-START##
Assembly Date      :: JUN-2019
Assembly Method    :: FLYE v. 06-2019
Genome Representation :: Full
Expected Final Version :: Yes
Genome Coverage    :: 100.0x
Sequencing Technology :: Illumina HiSeq; PacBio Sequel
##Genome-Assembly-Data-END##
FEATURES
    source      1..8587
                /organism="Wolbachia pipientis"
                /mol_type="genomic DNA"
                /submitter_seqid="contig_32109"
                /isolate="wEsol"
                /isolation_source="galls on Solidago altissima"
                /host="Eurosta solidaginis MN-2018-EFC"
                /db_xref="taxon:955"
                /environmental_sample
                /country="USA: Cowling Arboretum, Carleton College,
                Northfield, MN"
                /lat_lon="44.48 N 93.13 W"
                /altitude="280 m"
                /collection_date="2018-11"
                /metagenome_source="insect metagenome"
                /note="metagenomic"
    gene        <1..994
                /locus_tag="wEsol_00388"
    CDS         <1..994
                /locus_tag="wEsol_00388"
                /codon_start=1
                /transl_table=11
                /fullproduct="qcoverage 100 , hcoverage 97.0588235294118
                , similarity 100 , identity 100 , evaluate 1.13e-213 ,
                alnlength 330 , Bacteria , Proteobacteria ,
                WP_155969183.1 MULTISPECIES: hypothetical protein
                [Wolbachia]"
                /translation="TDESDRKSSDECSEAKPQSESPSSRKGSSESNSFSGSSTLSKKSI
                MPELEKLFIELEKWFLYFQQNGKKLDSTRSTHELSSKKTATSSERKVKSNPSKVTP
                VTEVHTENKPTLNDITELPSQGTVGKLNMPGDRSSKISVDSGLGSLERGQSPSLIE
                EFSDSLQQTPLIVDKLENIFSKLLSVVHLLKNPASPTHKDVSGGLKLQQHLDSDQRE
                KLYKALSSKMKKKLDSEFLPEYEKLLYLLYVDKREVRLLLSPPGEVEQVCSVLPSEE
                KEQAQSSSSSEEVRLFQEFFSNQKVSDNYLTSSKIDSPEIETCLKKEISQAVCT"
                /product="hypothetical protein"
                /besthit="qcoverage 100 , hcoverage 97.0588235294118 ,
                similarity 100 , identity 100 , evaluate 1.13e-213 ,
                alnlength 330 , Bacteria , Proteobacteria ,
                WP_155969183.1 MULTISPECIES: hypothetical protein
                [Wolbachia]"
    gene        complement(1177..3084)
                /locus_tag="wEsol_00389"
    CDS         complement(1177..3084)
                /locus_tag="wEsol_00389"
                /codon_start=1
                /transl_table=11
                /fullproduct="qcoverage 100 , hcoverage 100 , similarity
                100 , identity 100 , evaluate 0.0 , alnlength 635 ,
                Bacteria , Proteobacteria , WP_141457217.1 MULTISPECIES:
                excinuclease ABC subunit UvrB [unclassified Wolbachia]"
                /cog="UvrB COG0556 663 Helicase subunit of the DNA

```

excision repair complex"  
 /pfam="ResIII DEAD AAA\_19 Kinesin Pfam-B\_6675 Pfam-B\_5382  
 Pfam-B\_248 Pfam-B\_467 Helicase\_C UvrB UVR"  
 /tigr="TIGR00631 uvrB 658 excinuclease ABC subunit B"  
 /product="excinuclease ABC  
 subunit UvrB"  
 /translation="MEFQIATHFQPPAGDQPPQAIDSLIAGLNSNKRQDVLLGVTGSGKT  
 FTMANVIARTNRPALIMAHNKTAAQLYEEMKGLFPHNAVEYFISYYDYYQPEAYLPQ  
 TDYIEKDSAINERIEMLRYSTVCSLLERRDTIVVASVSCIYGLGSPESYRSMIIPLS  
 VGNKIRINDFLSNLTDLQYKRSDFERGFYFRVRGDIIDIFPSHYENKAWRLSLFGDE  
 IEEISEVDAITGNVTKGVNKITIFPNSYYITPREALLQAIELVKKELHERLDYYSQN  
 KIVEAKRLEQRTNFDIEMMRTTGICKGIENYSRYLYGMEAGDPPPTLFEYLPKDVILF  
 VDESHVTVPQVGAMYSNGNEARKKKLIDYGFRLPSAFDNRPLKFEEWEGVRPQTVYISA  
 TPGKYELAKTNNVFIEQVIRPTGLTDPICIVKPIESQIDDDVIHEAQVTIGKGFVCLIT  
 TLTKKMAENLAEYMSELNMRVSYLHSDIAALERIEIIYKLSKEIDVLVGVNLLREGL  
 DIPECGLVAILDADKEGFLRSETSLIQTIGRAARNAEGRVILYADKITGSLDRALRET  
 ERRRRKKQEEHNILHNIIPKTIKPISENTLQERAIAEPKVNTNKKDDLKQMIHAKNLE  
 FEEAARIKKLL"  
 /besthit="qcoverage 100 , hcoverage 100 , similarity 100  
 , identity 100 , evalue 0.0 , alnlength 635 , Bacteria ,  
 Proteobacteria , WP\_141457217.1 MULTISPECIES:  
 excinuclease ABC subunit UvrB [unclassified Wolbachia]"  
 complement(3480..3776)  
 /locus\_tag="wEsol\_00390"  
 CDS complement(3480..3776)  
 /locus\_tag="wEsol\_00390"  
 /codon\_start=1  
 /transl\_table=11  
 /fullproduct="qcoverage 100 , hcoverage 100 , similarity  
 100 , identity 100 , evalue 1.48e-61 , alnlength 98 ,  
 Bacteria , Proteobacteria , WP\_081600786.1 MULTISPECIES:  
 transposase [Wolbachia]"  
 /cog="COG3293 COG3293 124 Transposase and inactivated  
 derivatives"  
 /pfam="DDE\_Tnp\_1\_2 DDE\_Tnp\_1"  
 /product="transposase"  
 /translation="MVESAKENLSEVKNILVDAGYTGENFATKIKTIIIGATVEVIKRS  
 ELHSFAVLPPQRWVVERSFAWLEKCRRLWKNCRKLNTSLQMVVLSFISLLRRF"  
 /besthit="qcoverage 100 , hcoverage 100 , similarity 100  
 , identity 100 , evalue 1.48e-61 , alnlength 98 ,  
 Bacteria , Proteobacteria , WP\_081600786.1 MULTISPECIES:  
 transposase [Wolbachia]"  
 gene 3886..4059  
 /locus\_tag="wEsol\_00391"  
 CDS 3886..4059  
 /locus\_tag="wEsol\_00391"  
 /codon\_start=1  
 /transl\_table=11  
 /fullproduct="qcoverage 100 , hcoverage 100 , similarity  
 100 , identity 100 , evalue 5.67e-34 , alnlength 57 ,  
 Bacteria , Proteobacteria , ERN55436.1 transposase  
 [Wolbachia pipientis wMelPop]"  
 /translation="MKEKVTEIFCIVDDFCNTVDENFAEKLLPSGKKPTRTPEITHSE  
 IFTIILLYQVRQF"  
 /product="transposase"  
 /besthit="qcoverage 100 , hcoverage 100 , similarity 100  
 , identity 100 , evalue 5.67e-34 , alnlength 57 ,  
 Bacteria , Proteobacteria , ERN55436.1 transposase  
 [Wolbachia pipientis wMelPop]"  
 gene 4311..4442

```

CDS      /locus_tag="wEsol_00392"
         4311..4442
         /locus_tag="wEsol_00392"
         /codon_start=1
         /transl_table=11
         /product="hypothetical protein"
         /pfam="DDE_Tnp_1_3"
         /translation="MGGFSVHLVINETGEIQGVTVIKGNVDTCAKFNSEIDWIIIVWR"
         /besthit="qcoverage 95.3488372093023 , hcoverage
45.5555555555556 , similarity 97.6 , identity 97.6 ,
evaluate 4.08e-20 , alnlength 41 , Bacteria ,
Proteobacteria , ERN55437.1 hypothetical protein
WMELPOP_04488 [Wolbachia pipientis wMelPop]"
gene     4387..4707
         /locus_tag="wEsol_00393"
CDS      4387..4707
         /locus_tag="wEsol_00393"
         /codon_start=1
         /transl_table=11
         /pfam="DDE_Tnp_1_3 DDE_Tnp_1 DDE_4 DDE_Tnp_1_6"
         /fullproduct="qcoverage 100 , hcoverage 100 , similarity
99.1 , identity 97.2 , evaluate 7.02e-66 , alnlength 106 ,
Bacteria , Proteobacteria , ONI57662.1 putative protease
domain protein [Wolbachia pipientis wVitA]"
         /translation="MIPVPNLTQKLTGLLFGDKGYIKKDLFHELFDRLKLVTSIKKG
TKNSLMALNEKILLRKRSIIETVFGSLKNKFEIEHTRHRSPINFLVHIFSTLVSYSIQ
PLHF"
         /product="putative protease domain protein"
         /besthit="qcoverage 100 , hcoverage 100 , similarity 99.1
, identity 97.2 , evaluate 7.02e-66 , alnlength 106 ,
Bacteria , Proteobacteria , ONI57662.1 putative protease
domain protein [Wolbachia pipientis wVitA]"
gene     complement(6374..6760)
         /locus_tag="wEsol_00394"
CDS      complement(6374..6760)
         /locus_tag="wEsol_00394"
         /codon_start=1
         /transl_table=11
         /fullproduct="qcoverage 100 , hcoverage 100 , similarity
100 , identity 100 , evaluate 1.02e-82 , alnlength 128 ,
Bacteria , Proteobacteria , WP_015589263.1 MULTISPECIES:
cytochrome c-type biogenesis protein CcmH [Wolbachia]"
         /cog="CcmH COG3088 153 Uncharacterized protein involved
in biosynthesis of c-type cytochromes"
         /pfam="CcmH"
         /tigr="TIGR03147 cyt_nit_nrfF 126 cytochrome c nitrite
reductase, accessory protein NrfF"
         /product="cytochrome c-type
biogenesis protein CcmH"
         /translation="MRAVVSLLFILIFHSGVNAFTLDNKLKRDKSMEKRATSLFEIIRC
PICSGESLSESGSQIAYDMREAIRKKINDGYTDEEIISELKNSYGNSSIIIVPPIKSST
YILWFIPLTTLIGCFLIQRYINTTT"
         /besthit="qcoverage 100 , hcoverage 100 , similarity 100
, identity 100 , evaluate 1.02e-82 , alnlength 128 ,
Bacteria , Proteobacteria , WP_015589263.1 MULTISPECIES:
cytochrome c-type biogenesis protein CcmH [Wolbachia]"
gene     complement(6744..7784)
         /locus_tag="wEsol_00395"
CDS      complement(6744..7784)
         /locus_tag="wEsol_00395"

```

```

/codon_start=1
/transl_table=11
/fullproduct="qcoverage 100 , hcoverage 100 , similarity
100 , identity 100 , evalue 2.98e-242 , alnlength 346 ,
Bacteria , Proteobacteria , WP_015589262.1 MULTISPECIES:
hypothetical protein [unclassified Wolbachia]"
/translation="MRKIFIYIIISLLLFIPVAYSGFWYFSACKVKNLLAETILYIND
EKFDISHDFSGFPSNLIFRVTPNPKFSNEQLTISSDALLIKNRLFDKSVYIYIPSEVN
IAVHDDEKKNIKCHTNDSSHVVRNLNDLPSSLRFNKNSTVIDYIDTLRYEDYGLKCDV
LENQQSVITEVNDKSNYIQFHLDKEPSGNTKLGFDYTYRYKNTASPESYLSIDTKFD
YEFVNHISASRINFNIEKFLIQSNNFSLAADGGVRNYNLVTSSFKDKINVAISNYKEL
ISFMIGDSKTSDAFEKLMSSLSEKTTDDGIQFSIKYDDDVGSSFIGKLSTTDFMNQLS
KITQLTKDESSS"
/product="hypothetical protein"
/besthit="qcoverage 100 , hcoverage 100 , similarity 100
, identity 100 , evalue 2.98e-242 , alnlength 346 ,
Bacteria , Proteobacteria , WP_015589262.1 MULTISPECIES:
hypothetical protein [unclassified Wolbachia]"
gene complement(7792..8139)
/locus_tag="wEsol_00396"
CDS complement(7792..8139)
/locus_tag="wEsol_00396"
/codon_start=1
/transl_table=11
/fullproduct="qcoverage 100 , hcoverage 100 , similarity
100 , identity 100 , evalue 1.03e-78 , alnlength 115 ,
Bacteria , Proteobacteria , WP_012673282.1 MULTISPECIES:
ferredoxin family 2Fe-2S iron-sulfur cluster binding
protein [Wolbachia]"
/cog="Fdx COG0633 102 Ferredoxin"
/pfam="Fer2"
/tigr="TIGR02007 fdx_isc 110 ferredoxin, 2Fe-2S type, ISC
system"
/product="ferredoxin family
2Fe-2S iron-sulfur cluster binding protein"
/translation="MPSVTFILPDGSKKSYEAAEGETLLNLAHRSDPDLLGACEGSL
ACSTCHVIVDPKFYNAVEIHNPISDEENDMLDLAFLGTETSRGCGQIKITKDIDGLCV
TIPRGTRNISLTK"
/besthit="qcoverage 100 , hcoverage 100 , similarity 100
, identity 100 , evalue 1.03e-78 , alnlength 115 ,
Bacteria , Proteobacteria , WP_012673282.1 MULTISPECIES:
ferredoxin family 2Fe-2S iron-sulfur cluster binding
protein [Wolbachia]"

```

#### ORIGIN

```

1 tactgatgaa agtgatcgaa aaagtagtga tgagtgttct gaagcaaagc cacagagtga
61 atctccgagt agccggaaaag ggtcagaaaag taattcgttt tcaggtagta gtactttatc
121 aaaaaaatct attatgccag agctagagaa gttgtttata ttagagctag aaaagtggtt
181 cctatatattt cagcaaaaatg gcaaaaaact tgactcgacg cgttcaactc atgagccttc
241 aagtaaaaaa acagctactt catcagaaaag aaaagtaaaa agtaattcac cctcaaaaagt
301 gactcctggt actgaagtac ataccgaaaa caagcctact gaattaaatg atagtattac
361 agaactcccg tcacaaggta ccgtaggcaa actaaacatg cccggggacc gtagttctaa
421 aattttctgta gatagtgggt tagggtcgct tgagcgggga cagtcaccgt cgcttattga
481 agagtttagt gattcacttc agcagacacc gttaatatgt gataaacttg aaaatatatt
541 tagtaaatata ttaagtgttg ttcacaatct attaaaaaac ccggcttctc ctacgcataa
601 agatgtgtcg ggtggactaa agttgcaaca acatcttgat tctgatcaga gagagaaaact
661 atacaaagct ctttcttcta agatgaagaa gaagctagat tccgaacttt ttctccctga
721 gtacgagaag ttactatacc tactttatgt tgataagagg gaggtgcgtt tgcttctttc
781 tcctcctggg gaagtagagc aagtgtgctc agttcttcct tctgaggaga aggagcaagc
841 acaatcaagt tcttctgagg aggtagtacg cttatttcag gaggttctta gtaatcaaaa
901 agttagtgat aactatctta caagttctaa gatagattct cctgagatcg agacatgctt

```

|      |             |             |             |             |             |             |
|------|-------------|-------------|-------------|-------------|-------------|-------------|
| 961  | gaaaaaagaa  | atctctcaag  | cggtttgtac  | ctaattccact | gctctcagcc  | accctaagcg  |
| 1021 | ttttattagc  | tgacctgag   | agcactgggtg | ttagtttttc  | tcattccattg | tcagatattg  |
| 1081 | catcgtaacta | aataatttaa  | aagtattaat  | ataaagatat  | caataaaaatt | atctacattt  |
| 1141 | tcattgctatg | cccatagcat  | catatattac  | ttaaccttac  | aataattttt  | ttattcttgc  |
| 1201 | tgcttcttca  | aactccaaat  | ttttagcatg  | ctctatcatt  | tgctttctca  | aatcatcctt  |
| 1261 | attagtattt  | actttcgggt  | ctgctattgc  | cctctcctgt  | aagggtgttg  | atatagggtt  |
| 1321 | tattatagtc  | ttcgggataa  | tattgtgcaa  | tatattatgt  | tcttcttgtt  | tttttcttct  |
| 1381 | tctttcgggtc | tctctcaatg  | cacgatctaa  | agaaccagtg  | atctttatctg | catacaaaat  |
| 1441 | tactctacct  | tcagcattac  | gtgcagcacg  | accaatcgtt  | tgaattaatg  | aagtttccga  |
| 1501 | tcgcaaaaat  | ccttctttat  | cagcatccaa  | aattgcaacc  | aaccacact   | ctggaatatc  |
| 1561 | aagaccttcc  | ctcagcaagt  | taacacctac  | taaaacatcg  | atctctttag  | atctcaattt  |
| 1621 | gtatataatt  | tctattctct  | ccagcgcagc  | aatatcagaa  | tgcaataaac  | tcactctcat  |
| 1681 | attcaattca  | ctcatatatt  | cagctaaatt  | ttcagccatc  | tttttcgtca  | atgtagtgat  |
| 1741 | taaaacacaa  | aatcccttcc  | ctattgtcac  | ttgtgcctca  | tgaattacat  | catcaatttg  |
| 1801 | actctctatt  | gggttttaca  | tgcagattgg  | gtctgtaagc  | cctgttggac  | ggataacttg  |
| 1861 | ctctataaat  | acattattgg  | tctttgccaa  | ctcactctt   | cctggagtgg  | ctgaaatgta  |
| 1921 | aacagtctgc  | ggcctaactc  | cctcccactc  | ttcaaatttt  | aatggacgat  | tatcaaaagc  |
| 1981 | ggaagggagc  | ctgaagccat  | agtcaatcaa  | tttcttttta  | cgcgctcat   | taccactgta  |
| 2041 | catcgcacca  | acctgaggaa  | cggtgacatg  | actctcatca  | acaaataaaa  | ttacgtcttt  |
| 2101 | gggtaaatat  | tcaaacaaag  | taggcgggtg  | atccccagct  | tccattccat  | agagataacg  |
| 2161 | cgaataaatt  | tcaatacctt  | tacatattcc  | tggtgttctc  | atcatttcga  | tatcaaaatt  |
| 2221 | agtgcgttgc  | tcgagggcgt  | ttgcttcaac  | aatcttattt  | tgcgagttag  | aataatccaa  |
| 2281 | gcgttcatgc  | agctcttttt  | tgactagttc  | aattgcctgc  | aacaaagcct  | cacgcggggg  |
| 2341 | tatgtaatag  | ctatttgtaa  | aaatgggtgat | tttattttac  | cctttggtaa  | cattgcccgt  |
| 2401 | tatagcatca  | acttcagaaa  | tttcttctat  | ttcatcgcca  | aataacgata  | aacgccaagc  |
| 2461 | tttattttca  | taatgggaag  | gaaatatatc  | aataatatcg  | ccgcgcactc  | tgaaatatcc  |
| 2521 | tctctcaaac  | ctggcatcag  | agcgcttgta  | ttgaagatca  | gttaagttgc  | tcaggaaatc  |
| 2581 | attaatacga  | atcttatttc  | caacactaag  | cggtatgatc  | atgctgcggg  | agctctcagg  |
| 2641 | cgaaccaaga  | ccgtatatgc  | aggaaacact  | ggcaactacg  | atcgtatccc  | tgcgctccaa  |
| 2701 | aagggagcag  | acggtggaat  | aacgcagcat  | ctcaattctt  | tcgttaattg  | cagaatcttt  |
| 2761 | ttcgatataa  | gtatcagttt  | gtggtaaata  | ggcttcagggt | tgataataat  | cataataaga  |
| 2821 | aatgaagtat  | tcaacagcat  | tatggggaaa  | caatcctttc  | atcttctcat  | aaagctgtgc  |
| 2881 | tgctaaagtt  | ttattgtgtg  | ccataattaa  | tgcaaggcctg | tttgtccttg  | caataacatt  |
| 2941 | tgccatagta  | aaagttttcc  | cagaaccagt  | aactccaagc  | aaaacctgat  | ctcttttatt  |
| 3001 | gctattttagc | cctgcaatta  | agctatcgat  | tgctgtgtgt  | tgatccccag  | ccggttgaaa  |
| 3061 | atgtgtagcg  | atcttgaaatt | ccatagactt  | tacttactat  | ctttgattca  | ttgtatagta  |
| 3121 | aacactatat  | tgctttttaag | ataagttgta  | tagctatcgt  | aaagccataa  | aacattaacc  |
| 3181 | aacaatgtca  | tgcaagtagc  | tgacactgga  | atcttgtttc  | aatgttaaag  | aaaataccat  |
| 3241 | agaattcaag  | aagacaattc  | ctaaaaaatc  | cctacatcca  | aaaaaaggca  | aatgctgtct  |
| 3301 | tgaataagct  | aaattttttt  | agatgcaaaa  | acaataaaaac | atagttgata  | ctaaagtatt  |
| 3361 | agtactccta  | tgacaacggt  | acaaaaatta  | aggaaatgga  | tagctctgat  | caattggaat  |
| 3421 | agtattttca  | ggtaccgggtg | gtcaatatga  | cattttttaa  | ataaagattt  | agaacctgtt  |
| 3481 | taaaatcttc  | tcaatagaag  | agaaatgaag  | gaaagaacga  | ccattttagt  | gctagtgtta  |
| 3541 | agttttcgtc  | cgcaattttt  | ccacaatcgt  | ctgcattttt  | ctaaccaagc  | gaaagatcgc  |
| 3601 | tctacaaccc  | atctttgttg  | caatacagca  | aaggaatgta  | attcacttcg  | ttttattact  |
| 3661 | tctacagttg  | ctccaataat  | cgtttttatt  | ttagttgcaa  | aattttctcc  | tgtataacct  |
| 3721 | gcatcgacca  | gtatattttt  | aacttccgag  | aggttttctt  | ttgcgctttc  | aaccattctc  |
| 3781 | acagcactgc  | taaccccgat  | tgtaaattag  | aaaaaataga  | aaaggttaag  | aaatagggtta |
| 3841 | aactccgagg  | tatttgatat  | tcatttctaa  | aataggagggt | taccaatgaa  | agagaaagta  |
| 3901 | acagaaatct  | tttgtatagt  | cgatgatttt  | tgcaatacag  | tcgatgaaaa  | ttttgcagaa  |
| 3961 | aaacttctac  | caagtggcaa  | aaaaccaacc  | aggacgccag  | agattacgca  | ttcagagatt  |
| 4021 | tttaccataa  | tattgctata  | tcaagtgcga  | caatttttaa  | atcttctatg  | tgcatatttt  |
| 4081 | gaaattatta  | tacgaatcag  | cgttttccaa  | attgccatcc  | tatagtaggt  | ttatcagggt  |
| 4141 | aaaatcgcg   | atcttatggg  | atttagcgct  | cttaatgcaa  | tggtttttgc  | aacagtcaaa  |
| 4201 | agtgcaggg   | atctcgta    | tagatgcaac  | atctatcgct  | gtttgccatc  | caaaaaggac  |
| 4261 | ctcgagaaac  | aaagttttca  | aagggttggc  | aaagattgga  | aagactactt  | atgggtggtt  |
| 4321 | tttcgggtaca | tctagtaatc  | aatgaaactg  | gcgaaattca  | aggggttacg  | gtgataaaag  |
| 4381 | gcaacgttga  | tacctgtgcc  | aaatttaact  | cagaaattga  | ctggattatt  | gtttggagat  |
| 4441 | aaaggatata  | tcaaaaaaga  | tctttttcac  | gaattattcg  | atagagggtt  | aaagcttgta  |
| 4501 | accagtataa  | aaaagggtac  | gaaaaactca  | ttaatggcgc  | taaatgagaa  | gattttgtta  |

|      |             |             |             |             |             |             |
|------|-------------|-------------|-------------|-------------|-------------|-------------|
| 4561 | agaaaaagat  | cgattattga  | gacagttttt  | ggctctctga  | aaaacaaatt  | tgagattgag  |
| 4621 | catactcgcc  | atagatcacc  | gataaatfff  | ttggtacaca  | ttttttctac  | gcttggttca  |
| 4681 | tattccatac  | agccgctgca  | tttctaagct  | ttacttcggt  | ggctaataccg | caactgggggt |
| 4741 | atataggggt  | gacaccaagg  | caatattctt  | ctggagaagt  | tgatcggcat  | ggcagcatat  |
| 4801 | caaagatggg  | accagcggaa  | tgtagaagta  | tgttatatga  | agctgcacaa  | acaatgctta  |
| 4861 | cagttaccaa  | gaggacattt  | aaattaaaaa  | actgggggtg  | cgaagaaaaa  | aggaatgaaa  |
| 4921 | aaagcaattg  | tagcagtagc  | aagaaaatta  | gctgtaatta  | tgcataggat  | gttgggtgat  |
| 4981 | aaaacagaat  | tttattatca  | ataaacatca  | aaagagcata  | ggacaataat  | tttattgaaa  |
| 5041 | ataaagatag  | caatgccgat  | ggaagggaca  | agcaagaact  | tagttagact  | tcgtggtaat  |
| 5101 | accaatcccg  | ctacacagta  | acggatagac  | cataataaga  | aaaaaagcca  | tactgaatta  |
| 5161 | agtaaagtag  | caggttttaa  | tggcatgaag  | atcaaaaatta | tttggataaa  | aagtgggtgga |
| 5221 | tcaggcaaaa  | gaaatgctga  | gaaagtaaga  | aatacgctat  | gttgcaaaaa  | aactaatgct  |
| 5281 | gtattgcagc  | aaaaaagcac  | agtataaaca  | gccgtaagca  | agatatagct  | gcatttcaag  |
| 5341 | aaaggcactt  | actgctgacc  | taaaatttgg  | cagagacaaa  | aattatttgc  | tccgcctcaa  |
| 5401 | cgcgtagaaa  | aactatatgt  | aatcaaagtc  | acgtgacaag  | ttgggtgtgg  | atagaggaaa  |
| 5461 | accacaata   | ttactataaa  | aaaatgaaaa  | taagattcaa  | gaaaagtttg  | gtttgaatat  |
| 5521 | cagcaaattc  | acagtacacc  | gtaatatgca  | agaatgaaa   | ttctcatata  | cacaccaaga  |
| 5581 | ccagtgcata  | acggacaaga  | taaaagtaaa  | caagaggaa   | ttaaaaaaaa  | atcttatgaa  |
| 5641 | actaattggt  | cagttcctga  | aaagagctat  | tttctgctga  | tgaatcgcg   | tttggcacac  |
| 5701 | attcaaagat  | tggacacggg  | tggtttttaa  | aaaggcatta  | ggacacaggt  | ttaggtacac  |
| 5761 | taggtaggca  | aaatttttta  | tctctatagt  | gagttatccc  | agaaatggag  | aagttctagc  |
| 5821 | tcaaacgtca  | atactgattg  | tatgaatata  | ttccttgagc  | agatgtcaca  | ttttaggaac  |
| 5881 | aaggggaggca | tttcttatca  | tggattgtgc  | tatgttgtag  | aagtcaaaaa  | attaaaagta  |
| 5941 | cctaaaatat  | cgacattata  | tacctaccac  | catactcacc  | tgacctcatc  | ctggtgagag  |
| 6001 | ttttggttat  | aatataaaac  | atgaacattt  | ttgcgtaaaa  | aatctagaca  | caattgcttt  |
| 6061 | gcttgagagc  | gcttttgtgc  | aaattttatta | cctctctttt  | cactcccatt  | aaaaactctg  |
| 6121 | catgccgctt  | atttgattca  | cagtaaataga | gattggtaga  | aacatggtgc  | cgtccacttc  |
| 6181 | cgcctaacaa  | gtataatgcy  | gcttgacaaa  | tttattgtca  | tctcagaccg  | cggagagaa   |
| 6241 | catatgctac  | ttttaactta  | tgtaaaatta  | ccaaggatta  | tggagaagat  | atgctgtttt  |
| 6301 | gatttgtgtg  | aaaattattg  | ttgacttatg  | tgcaattaga  | gaacctaaat  | cacttttagct |
| 6361 | atatataaaa  | gggtttaagt  | gttgatttga  | tgtatctttg  | tattaaaaaa  | caccaataaa  |
| 6421 | gcagagttgt  | aagtggaaata | aaccacaaaa  | tgtaaagtgc  | agattttata  | ggcggtagca  |
| 6481 | ttataattga  | attgccgtaa  | gaatttttta  | actctgagat  | tatctcttca  | tctgtgtatc  |
| 6541 | catcattgat  | ttttttacga  | attgcttctc  | gcataatcata | cgcgatctga  | gatccagatt  |
| 6601 | cagacaatga  | ttcgccagaa  | catattggac  | accttattat  | ttcaaataaa  | ctgggttgctc |
| 6661 | gtttttccat  | gctttttatct | ctgagtttat  | tatccagagt  | aaaagcgttt  | acgcctgagt  |
| 6721 | ggaatatcaa  | tatgaaaagt  | aaactaacta  | ctgctctcat  | ccttggttaa  | ttgggttatt  |
| 6781 | ttactgagct  | ggttcataaa  | atcagtggtg  | gataactttc  | caataaagct  | tgaccctaca  |
| 6841 | tcatcatcgt  | acttttattga | aaattgaatg  | ccatcatcag  | ttgttttttc  | tgataaggaa  |
| 6901 | gacattaatt  | tttcaaacgc  | atctgaagtt  | tttgagtcac  | caatcataaa  | cgagattaat  |
| 6961 | tctttataat  | ttgatatagc  | cacgttgatt  | ttgtctttta  | atgaagacgt  | aaccaaatta  |
| 7021 | taattttcgca | ctccaccatc  | tgcagcaaga  | gaaaaattat  | tactttgaat  | taaaaatttc  |
| 7081 | tctatgttga  | aattaattct  | ggaagctgag  | atgtgggtta  | caaattcgta  | atcaaattta  |
| 7141 | gtgtcgatac  | taaggtaact  | ttcaggactt  | gcagtatfff  | tataccgata  | agtataaaaa  |
| 7201 | tcaaataccta | gttttagtatt | tccacttgg   | tctttatcga  | ggtgaaattg  | aatgtaatgt  |
| 7261 | cttttatcat  | tcacttcagt  | tataacactt  | tgtgtatttt  | ctaaaaacatc | acattttta   |
| 7321 | ccataatctt  | cgtaacgaag  | tgtatctata  | tagtctatca  | cggtaactatt | tttgttgaat  |
| 7381 | cgcaatgaag  | atggtaaatc  | gtttagtcta  | acaacaaagt  | ggctgctatc  | gtttgtgtgg  |
| 7441 | cattttatat  | tctttttctc  | atcatcatga  | acagcaatgt  | tgacttcatt  | gcttggtatg  |
| 7501 | tagatatata  | ctgatttatc  | aaacaatcta  | ttttttatca  | ataaagcatc  | agatgagatg  |
| 7561 | gttaattgct  | cattggaaaa  | ttttgggttt  | gtcacacgga  | aaattaggtt  | agaaggaaat  |
| 7621 | ccactaaaa   | catgtgaaat  | atcaaatfff  | tcgtcggtta  | tgtatagtat  | tgtttcagct  |
| 7681 | aaaagatttt  | ttaccttaca  | tgcagaaaaa  | taccaaaaa   | cactatacgc  | tacaggaata  |
| 7741 | aacaaaagta  | aagagatgat  | aatatagata  | aaaatcttac  | gcatgattcc  | cctatttatc  |
| 7801 | taatgatatg  | tttcttgtag  | cccttgggtat | ggttacacac  | aagccgtcga  | tatcttttgt  |
| 7861 | gattttttatt | tggcatccaa  | gcctcgacgt  | ctctgttaag  | ccgaaagcta  | ggtctaacat  |
| 7921 | atcattttcc  | tcatcagata  | taggggttatg | tatttctaca  | gcattataaa  | actttggatc  |
| 7981 | aacaattaca  | tggcatgtag  | agcaagcaag  | agaaccttca  | catgcacctt  | caagcagatc  |
| 8041 | tggatcactt  | ctgtgggcta  | aattgagcag  | agtttctccc  | tctgcagctt  | catagctttt  |
| 8101 | cttactccca  | tcaggtaaaa  | taaaagtaac  | agatggcata  | ttatttctat  | taaaatcctt  |

```
//
LOCUS      JAQZAU010000047                28030 bp    dna        linear    ENV 17-MAR-2023
DEFINITION MAG: Wolbachia pipientis isolate wEsol contig_32754, whole genome
            shotgun sequence.
ACCESSION  JAQZAU010000047  JAQZAU010000000
VERSION    JAQZAU010000047.1
DBLINK     BioProject: PRJNA929258
            BioSample: SAMN33142973
KEYWORDS   WGS; ENV; Metagenome Assembled Genome; MAG.
SOURCE     Wolbachia pipientis (insect metagenome)
  ORGANISM Wolbachia pipientis
            Bacteria; Pseudomonadota; Alphaproteobacteria; Rickettsiales;
            Anaplasmataceae; Wolbachieae; Wolbachia.
REFERENCE  1  (bases 1 to 28030)
  AUTHORS  Fiutek,N., Couger,B.M., Roy,S., de la Torre,J.R. and Connor,E.F.
  TITLE    Genomic assessment of the contribution of the Wolbachia
            endosymbiont of Eurosta solidaginis to gall-induction
  JOURNAL  International Journal Molecular Sciences
REFERENCE  2  (bases 1 to 28030)
  AUTHORS  Fiutek,N., Couger,B.M., Roy,S., de la Torre,J.R. and Connor,E.F.
  TITLE    Direct Submission
  JOURNAL  Submitted (10-FEB-2023) Biology, San Francisco State University,
            1600 Holloway Ave, San Francisco, CA 94132, USA
COMMENT    ##Genome-Assembly-Data-START##
            Assembly Date           :: JUN-2019
            Assembly Method          :: FLYE v. 06-2019
            Genome Representation     :: Full
            Expected Final Version    :: Yes
            Genome Coverage           :: 100.0x
            Sequencing Technology     :: Illumina HiSeq; PacBio Sequel
            ##Genome-Assembly-Data-END##
FEATURES   Location/Qualifiers
     source      1..28030
                  /organism="Wolbachia pipientis"
                  /mol_type="genomic DNA"
                  /submitter_seqid="contig_32754"
                  /isolate="wEsol"
                  /isolation_source="galls on Solidago altissima"
                  /host="Eurosta solidaginis MN-2018-EFC"
                  /db_xref="taxon:955"
                  /environmental_sample
                  /country="USA: Cowling Arboretum, Carleton College,
                  Northfield, MN"
                  /lat_lon="44.48 N 93.13 W"
                  /altitude="280 m"
                  /collection_date="2018-11"
                  /metagenome_source="insect metagenome"
                  /note="metagenomic"
     gene        <1..300
                  /locus_tag="wEsol_00397"
     CDS         <1..300
                  /locus_tag="wEsol_00397"
```

```

/codon_start=1
/transl_table=11
/product="hypothetical protein"
/pfam="Pfam-B_208 Sigma70_r4"
/tigr="TIGR02393 RpoD_Cterm 238 RNA polymerase sigma
factor RpoD"
/translation="DDSSTFGDCIEDKRVS RPEDAAAILADLRGITTNVLATLTPKEER
ILMRMRFGLGKDGKEHTLEEVGKIFNVTRERIRQIEAKALRKLKHP SRARKLRGFF"
/cog="RpoD COG0568 342 DNA-directed RNA polymerase, sigma
subunit (sigma70/sigma32)"
/besthit="qcoverage 100 , hcoverage 54.0983606557377 ,
similarity 100 , identity 100 , evalue 1.94e-59 ,
alnlength 99 , Bacteria , Proteobacteria , EAL60191.1 RNA
polymerase sigma factor RpoD [Wolbachia endosymbiont of
Drosophila simulans]"
gene 441..1421
/locus_tag="wEsol_00398"
CDS 441..1421
/locus_tag="wEsol_00398"
/codon_start=1
/transl_table=11
/fullproduct="qcoverage 100 , hcoverage 100 , similarity
100 , identity 100 , evalue 9.56e-238 , alnlength 326 ,
Bacteria , Proteobacteria , WP_010082050.1 MULTISPECIES:
SGNH/GDSL hydrolase family protein [Wolbachia]"
/cog="COG3240 COG3240 370
Phospholipase/lecithinase/hemolysin"
/pfam="Lipase_GDSL Lipase_GDSL_2"
/product="SGNH/GDSL
hydrolase family protein"
/translation="MTNKNDNSNSKYRNFYVLGDSLSDNGAIIGILNNLSFAKSVKFD
DPFYQGRSFSNGPTAVEYIAKYLDLDEFKPGWSYSFFGRCHEQQGQNYAVSYATASEI
FDPIFSYFFNKFR LANQLDAVIKHHDPDIGKEDLFCIIIGGNDVMVATAYDDTKAEVL
EQAVSEICNALKVLNEHGVKHVVVANAPEVGSIPAFNRDEEARELATKLTESFNAKLA
KGLDYMKKSTNLEIKAFDLNSKMRSMFSEYKSKGLNCQDACTSNIA DQVGRFKENIKI
LLKLIFKGELDVHYNPGCSKETLKDYFFFFDYFHPTAELHHEVGNEVYELI"
/besthit="qcoverage 100 , hcoverage 100 , similarity 100
, identity 100 , evalue 9.56e-238 , alnlength 326 ,
Bacteria , Proteobacteria , WP_010082050.1 MULTISPECIES:
SGNH/GDSL hydrolase family protein [Wolbachia]"
gene complement(1597..1980)
/locus_tag="wEsol_00399"
CDS complement(1597..1980)
/locus_tag="wEsol_00399"
/codon_start=1
/transl_table=11
/pfam="DEDD_Tnp_IS110"
/fullproduct="qcoverage 100 , hcoverage 100 , similarity
100 , identity 100 , evalue 9.12e-81 , alnlength 127 ,
Bacteria , Proteobacteria , WP_227738574.1 hypothetical
protein [Wolbachia endosymbiont of Drosophila simulans]"
/translation="MVLKCTSFNQGGRDYAKSLGITTKTDKIDCSIISRYINNTDMRV
TPLTVSNGNIDCLKQKLSRRNQLVEIAKIQKTQIQQVTDTSIIKQIEELLAILRNQIK
TLEDEMITFIDQNQELKRKYISITI"
/product="hypothetical protein"
/besthit="qcoverage 100 , hcoverage 100 , similarity 100
, identity 100 , evalue 9.12e-81 , alnlength 127 ,
Bacteria , Proteobacteria , WP_227738574.1 hypothetical
protein [Wolbachia endosymbiont of Drosophila simulans]"
gene complement(1931..2191)

```

CDS

```

/locus_tag="wEsol_00400"
complement(1931..2191)
/locus_tag="wEsol_00400"
/codon_start=1
/transl_table=11
/fullproduct="qcoverage 100 , hcoverage 100 , similarity
100 , identity 100 , evalue 3.32e-57 , alnlength 86 ,
Bacteria , Proteobacteria , WP_010082049.1 MULTISPECIES:
IS110 family transposase [Wolbachia]"
/cog="COG3547 COG3547 303 Transposase and inactivated
derivatives"
/pfam="DEDD_Tnp_IS110"
/product="IS110 family
transposase"
/translation="MNSSNIIAGIDVSKSKLDLHIHPLEHYKIFENNVQSIDEMLDL
RLHNVTKIGLEATGGYEKLCAYTLLSNGFEVYVIQPRWERLC"
/besthit="qcoverage 100 , hcoverage 100 , similarity 100
, identity 100 , evalue 3.32e-57 , alnlength 86 ,
Bacteria , Proteobacteria , WP_010082049.1 MULTISPECIES:
IS110 family transposase [Wolbachia]"

```

gene

CDS

```

complement(2188..2403)
/locus_tag="wEsol_00401"
complement(2188..2403)
/locus_tag="wEsol_00401"
/codon_start=1
/transl_table=11
/fullproduct="qcoverage 100 , hcoverage 100 , similarity
100 , identity 100 , evalue 4.94e-41 , alnlength 71 ,
Bacteria , Proteobacteria , WP_006279709.1 MULTISPECIES:
hypothetical protein [Wolbachia]"
/translation="MLRTSLYKYQSSDIKDTQRRGTVTPLDYKNRCSARFSSLVYYTE
SSEQLIELLGSYIRLENAVYVIITEEL"
/product="hypothetical protein"
/besthit="qcoverage 100 , hcoverage 100 , similarity 100
, identity 100 , evalue 4.94e-41 , alnlength 71 ,
Bacteria , Proteobacteria , WP_006279709.1 MULTISPECIES:
hypothetical protein [Wolbachia]"

```

gene

CDS

```

complement(2568..6023)
/locus_tag="wEsol_00402"
complement(2568..6023)
/locus_tag="wEsol_00402"
/codon_start=1
/transl_table=11
/fullproduct="qcoverage 100 , hcoverage 100 , similarity
100 , identity 99.9 , evalue 0.0 , alnlength 1151 ,
Bacteria , Proteobacteria , WP_015589495.1 MULTISPECIES:
carbamoyl-phosphate synthase large subunit [unclassified
Wolbachia]"
/pfam="CPSase_L_chain ATP-grasp_4 CPSase_L_D2 ATP-grasp
CPSase_L_D3 CPSase_L_chain ATP-grasp_4 RimK CPSase_L_D2
GARS_A ATP-grasp CPSase_L_D2 MGS"
/tigr="TIGR01369 CPSaseII_lrg 1052 carbamoyl-phosphate
synthase, large subunit"
/product="
carbamoyl-phosphate synthase large subunit"
/translation="MPKRTDIESILVIGAGPIVIGQACEFDYSGTQCKVLKSEGYKV
ILVNSNPATIMTDPEFSDATYIEPVLPEIIEKIIKERPDAILPTMGGQTALNCAIKL
ADDGVLDKYNVELIGVNRERAIKKAEDRELFRQSMKIGLKYPKSIIEKNQEQIKKALD
YVGLPAIIRSSFTLGGAGSGIAYNKEEFFNIAESALKISPINEVQIDESIIGWKEYEM
EVIRDCKDNCCIIVCSIENVDPMGVHTGDSITVAPALTLRDAEYQQMRNASIAVLREID

```

```

VSAGGANVQFAVNPKEGSLVVIEMNPRVSRSSALASKATGYPIAKVVTKLAIGYSLD
EIRNDCAPIIPAAFEFVIDYIVTKIPRFEFEKFKGKNCELSTSMKSVGEVMSIGRTFN
ESLQKAFRSLETDFDTGLDEVFPENIDIDHIKSQ LAKLLPNRLLIAADAMRHGISIEEI
NSITGYDLWFLQNIQQIILAEQKIKENGLPETAYEMLEMKKMGFS DARLAKLSNRPTS
VIPVPSNVIPVRDTGIQPALHAGDRVKQIEEIRKKFGIKQVYKRVDTC AAEFESSTAY
MYGCEYEGDVENKTECEANISDREKVVLGSGPNRIGQGIEFDYACVHAASA AKEMGYE
TIMINCNPETVSTDYDTADRLYFAPLIAEDVLEILSKEQENGLVGVIVQIGGQTP LK
LAKVLNERGFKILGTSFDSIDLAEDRMRFKNLALQLNLKQ PENSICHSVEEALTNAEK
VGFPLVVRPSYVLGGQSMSIRHDTQSFKEYVLNQTKIFEHGSLLLDKFLVNAVEVDVD
AVCDGEKVFI AAVMEHIEEAGIHSGDSTCSIPTNTLSDEVIKEIKLQTERIALALKVK
GLINIQFAVQENRPLAEPVCDEKSLGKVQMSTTEYSNVFEERRQALTTKLPSEIELCK
RSSDVYILEVNLRASRTVPFISKVINIPIAKLATQVILGKKLNQENKPFNHFAVKA AV
FPFTRFAGVD TLLGPEMKSTGEVMGIDSSFEAALAKVHMAAGYKLPTEGAALVSVKDD
DKEYILPVVRMLKELSF EIIYATKGTASYLNNNGIAAQAVNKVREGRPHIVDMLKDGKI
NLVINTSKGVKSVSDSKDIRRTAILQNIAYSTTASGSKALVLAIQYVKNSKLEVKS LQ
QIQNG"
/besthit="qcoverage 100 , hcoverage 100 , similarity 100
, identity 99.9 , evalue 0.0 , alnlength 1151 , Bacteria
, Proteobacteria , WP_015589495.1 MULTISPECIES:
carbamoyl-phosphate synthase large subunit [unclassified
Wolbachia]"
gene complement(6468..7223)
/locus_tag="wEsol_00403"
CDS complement(6468..7223)
/locus_tag="wEsol_00403"
/codon_start=1
/transl_table=11
/fullproduct="qcoverage 100 , hcoverage 100 , similarity
100 , identity 100 , evalue 1.19e-173 , alnlength 251 ,
Bacteria , Proteobacteria , WP_174516753.1 MULTISPECIES:
SDR family oxidoreductase [unclassified Wolbachia]"
/cog="FabG COG1028 251 Dehydrogenases with different
specificities (related to short-chain alcohol
dehydrogenases)"
/pfam="ELFV_dehydrog Shikimate_DH Eno-Rase_NADH_b
Pfam-B_3397 adh_short KR Epimerase NAD_binding_10 NmrA
Polysacc_synt_2 adh_short_C2"
/tigr="TIGR01963 PHB_DH 255 3-hydroxybutyrate
dehydrogenase"
/product="SDR family
oxidoreductase"
/translation="MDLAKEKEMGKLEGKVALITGASGGIGSAVAKRFIREGACVILI
SRSLDNLKPLYNEIEELEEFEKGSVKLIQLDLLDFENVKILTNMIESLKLSESGALDI
LVVCAGILGKLNPIHDCEIEELQNMNTNFTANWYLLKNLDPMLKKS NAGRAIFMTSE
VTLSPSSYPYWMPYAASKVALEIMVQIYASETKHTKLCVNAVYTEGPVGSEQA FPGSE
LVSPDKLTDKFVELASEDCGISGKILPLSKSPE"
/besthit="qcoverage 100 , hcoverage 100 , similarity 100
, identity 100 , evalue 1.19e-173 , alnlength 251 ,
Bacteria , Proteobacteria , WP_174516753.1 MULTISPECIES:
SDR family oxidoreductase [unclassified Wolbachia]"
gene complement(7210..8025)
/locus_tag="wEsol_00404"
CDS complement(7210..8025)
/locus_tag="wEsol_00404"
/codon_start=1
/transl_table=11
/fullproduct="qcoverage 100 , hcoverage 100 , similarity
100 , identity 100 , evalue 6.56e-181 , alnlength 271 ,
Bacteria , Proteobacteria , WP_015589493.1 MULTISPECIES:
YihY/virulence factor BrkB family protein [unclassified

```

```

Wolbachia]"
/cog="Rbn COG1295 303 Ribonuclease BN family enzyme"
/pfam="Virul_fac_BrkB"
/tigr="TIGR00765 yihY_not_rbn 259 YihY family inner
membrane protein"
/product="YihY/virulence
factor BrkB family protein"
/translation="MLQKFYSIVYCLYRALIDTIHNDGVEHAGYLSFLILLSIFPFLI
VLMAVASTFANFLDQYNIGWVFIIDNMPQDILSSLMPIREIISGPPQSLLTLAIVGA
VWTASSTIEGLRTILNKAYKVPVSPPYILRRVLSILQFLVITLIITLTIVFSTLVPML
IDFSYQVLSYTRYLLIEFVLFTVVSWLYFMLPNIKQNLSDVFPGSCVAVILWTISASA
FKQYLKASFDQLDLIYGSLGGVVVSLFFYMLSLIFIYGAKFNFQLKYFNGSR"
/besthit="qcoverage 100 , hcoverage 100 , similarity 100
, identity 100 , evalule 6.56e-181 , alnlength 271 ,
Bacteria , Proteobacteria , WP_015589493.1 MULTISPECIES:
YihY/virulence factor BrkB family protein [unclassified
Wolbachia]"
gene 8161..8481
/locus_tag="wEsol_00405"
CDS 8161..8481
/locus_tag="wEsol_00405"
/codon_start=1
/transl_table=11
/pfam="TrbC"
/fullproduct="qcoverage 100 , hcoverage 100 , similarity
100 , identity 100 , evalule 9.97e-66 , alnlength 106 ,
Bacteria , Proteobacteria , WP_174516754.1 TrbC/VirB2
family protein [Wolbachia endosymbiont of Cardiocondyla
obscurior]"
/translation="MKNFLLLVALILSFAFDANAANTFVDTSDDTSSVICKIIGYTHG
IGGPMITIVIIGAALLAIFGRMPWPALFALGAFTAVFFGAPVVVSKITPGGVICKDGA
VADK"
/product="TrbC/VirB2 family protein"
/besthit="qcoverage 100 , hcoverage 100 , similarity 100
, identity 100 , evalule 9.97e-66 , alnlength 106 ,
Bacteria , Proteobacteria , WP_174516754.1 TrbC/VirB2
family protein [Wolbachia endosymbiont of Cardiocondyla
obscurior]"
gene complement(9291..10370)
/locus_tag="wEsol_00406"
CDS complement(9291..10370)
/locus_tag="wEsol_00406"
/codon_start=1
/transl_table=11
/fullproduct="qcoverage 100 , hcoverage 100 , similarity
100 , identity 100 , evalule 3.45e-259 , alnlength 359 ,
Bacteria , Proteobacteria , WP_015589490.1 MULTISPECIES:
DNA replication/repair protein RecF [unclassified
Wolbachia]"
/cog="RecF COG1195 363 Recombinational DNA repair ATPase
(RecF pathway)"
/pfam="SMC_N AAA_15 AAA_23 AAA_29 Pfam-B_17122 AAA_21
AAA_15"
/tigr="TIGR00611 recf 365 DNA replication and repair
protein RecF"
/product="DNA replication/repair protein RecF"
/translation="MATHCYIKKLKLHNFRSHSNFELSDDDSSVVITGENGIGKTNIL
EAISLLAKSNGMKKAKASEIQNRFSNEDWVVHYDFFNGTDFNSIGIAKSFDDKLIQID
GKTQSSYSSLYKISNVIWLIPQMDYVLLNSPSDRLKFLDRIVSLFEENYTCCYMKYRK
AKHERSKLLRENILNKNWFSSLENIMAVNAVSILHMRSSVLKILQDTIDNHSSKLFKP

```

```

ASLKFFSSQLTLDDTAEYFQNRLENREKDSLTGRVTLGVHNDNFRVFCQKRNPINLC
STGEQKLLLLLSIILSSVKARCIHYNKAPLLLLDDIMSHLDKHYRKALMEEVLSIQCQT
WITDVNQDNFNSYLYSFKFFELSNE"
/besthit="qcoverage 100 , hcoverage 100 , similarity 100
, identity 100 , evalue 3.45e-259 , alnlength 359 ,
Bacteria , Proteobacteria , WP_015589490.1 MULTISPECIES:
DNA replication/repair protein RecF [unclassified
Wolbachia]"
gene complement(10387..10854)
/locus_tag="wEsol_00407"
CDS complement(10387..10854)
/locus_tag="wEsol_00407"
/codon_start=1
/transl_table=11
/fullproduct="qcoverage 100 , hcoverage 100 , similarity
100 , identity 100 , evalue 1.30e-107 , alnlength 155 ,
Bacteria , Proteobacteria , WP_015589489.1 MULTISPECIES:
thioredoxin-dependent thiol peroxidase [unclassified
Wolbachia]"
/cog="Bcp COG1225 157 Peroxiredoxin"
/pfam="AhpC-TSA Redoxin DUF899"
/tigr="TIGR03137 AhpC 187 peroxiredoxin"
/product="
thioredoxin-dependent thiol peroxidase"
/translation="MELVVGNAPDFSLPTDSGENLSLSEFFDKKNVALYFYPKDDTP
GCTMEAKGFRDKIDDFSSLDTVIIGVSKDSVKCHTNFKAKYSLPFSILVSDENAEMLGK
YGVWVEKSMFGKKYMGIERTTFLIDKKGKIVKIWKNVKVS GHVDEVLEE VKRI"
/besthit="qcoverage 100 , hcoverage 100 , similarity 100
, identity 100 , evalue 1.30e-107 , alnlength 155 ,
Bacteria , Proteobacteria , WP_015589489.1 MULTISPECIES:
thioredoxin-dependent thiol peroxidase [unclassified
Wolbachia]"
gene complement(11039..12382)
/locus_tag="wEsol_00408"
CDS complement(11039..12382)
/locus_tag="wEsol_00408"
/codon_start=1
/transl_table=11
/fullproduct="qcoverage 100 , hcoverage 94.1052631578947
, similarity 99.8 , identity 99.8 , evalue 1.24e-308 ,
alnlength 447 , Bacteria , Proteobacteria ,
WP_015589488.1 MULTISPECIES: HAMP domain-containing
histidine kinase [unclassified Wolbachia]"
/cog="BaeS COG0642 336 Signal transduction histidine
kinase"
/pfam="NrfD Pfam-B_6312 HisKA Pfam-B_15665 HATPase_c"
/product="HAMP
domain-containing histidine kinase"
/translation="MILFSVIYCNILLRSNFLSSYRDSSVNLKSVLENGI IKKYHYLL
IEKHHIKYKNFGYINQLVKLRAELLQSVSKVKDFSLILYDQNGRIIFS NFNTQDYDYE
QLLTNDEIDKLLSNQEILYTTGNTLTSIFPIFHENS AKPSFFLKILRSYNN SYVIAYG
LFLIFLGLLLIILILIMFYLFHFSNTKMLAKQHKTNIELQQIKEALEQENANKLKFFAS
VTHELRTPLNAIIGFAELIKNETLGSMDSQYKEYADDIYNAGTHLLALINDVLD FSK
AESSSLTVEKVKFNLNKIIDSCVNMLLPKLKEAGINLKKEMTNKQLLVIADSKRMKQV
IINLLSNSIKFTPKDGLIRMVIKENIEKNLLTIEFHDNGIGIMQQDIYKVMSVFGQAD
SGYRNEGTGIGLPLSKKLVELMGGTFDIKSEAKLGTITL NFFYEEQTCEDSIDF"
/besthit="qcoverage 100 , hcoverage 94.1052631578947 ,
similarity 99.8 , identity 99.8 , evalue 1.24e-308 ,
alnlength 447 , Bacteria , Proteobacteria ,
WP_015589488.1 MULTISPECIES: HAMP domain-containing

```

```

gene      histidine kinase [unclassified Wolbachia]"
          12532..13707
          /locus_tag="wEsol_00409"
CDS       12532..13707
          /locus_tag="wEsol_00409"
          /codon_start=1
          /transl_table=11
          /fullproduct="qcoverage 100 , hcoverage 100 , similarity
          100 , identity 99.7 , eval 1.26e-284 , alnlength 391 ,
          Bacteria , Proteobacteria , WP_015589487.1 MULTISPECIES:
          aspartate aminotransferase family protein [unclassified
          Wolbachia]"
          /cog="ArgD COG4992 404 Ornithine/acetylornithine
          aminotransferase"
          /pfam="Aminotran_3 Pfam-B_11691"
          /tigr="TIGR00707 argD 381 transaminase,
          acetylornithine/succinylornithine family"
          /product="aspartate
          aminotransferase family protein"
          /translation="MTISPILPVYSPININFSYGKDIYLYDIDGKRYVDFHSGIAVSS
          LGHTNSRLISALKLQGEKLWHISNTYNIPAANNFAEKLINNSFADTVFFSNSGSEAVE
          CGLKIARVYQNGKGNKNRHRLTFHGAFHGRTFLTCAANDKQKFSELLSPCIDWCDNI
          EPNIESVKKAISDIGVILIEPIQGQGGIKVMNEVFMKELRKLCDENDILLFFDCVQC
          GAGRTGKLFAYEHIGVEPDICALAKGIGGGFPLGACLATENAAKYMAVGMHGSTFGGN
          PLATSVGNAVFEELLSPGFLKNVEIRGKYLKNKLEDLASKFPPIIEEVRGKGLMLGIKV
          KADNQKFAEELSHRGLLTVGVTSDNVVRILPPLIITEKEIDKGIEILAQYLSEKSSD"
          /besthit="qcoverage 100 , hcoverage 100 , similarity 100
          , identity 99.7 , eval 1.26e-284 , alnlength 391 ,
          Bacteria , Proteobacteria , WP_015589487.1 MULTISPECIES:
          aspartate aminotransferase family protein [unclassified
          Wolbachia]"
gene      13708..14229
          /locus_tag="wEsol_00410"
CDS       13708..14229
          /locus_tag="wEsol_00410"
          /codon_start=1
          /transl_table=11
          /fullproduct="qcoverage 97.1098265895954 , hcoverage 100
          , similarity 100 , identity 100 , eval 7.96e-112 ,
          alnlength 168 , Bacteria , Proteobacteria ,
          WP_015589486.1 MULTISPECIES: ribosome maturation factor
          RimM [unclassified Wolbachia]"
          /cog="RimM COG0806 174 RimM protein, required for 16S
          rRNA processing"
          /pfam="RimM PRC"
          /tigr="TIGR02273 16S_RimM 166 16S rRNA processing protein
          RimM"
          /product="ribosome
          maturation factor RimM"
          /translation="MLDINMNDNLVCLGIITSPHGIKGAVKLKTFTEKPKNISLYGEL
          ISGDENYKIDSVSIIGDNLVIATISGVNSRNEAELLRNKKLYIERSKLPELNDEDEFY
          QSDLVDMEVRLESNELYGNVKSVMYVFGSGDILEILVISTKKRIMLSFTKEIFPHINIK
          GRYIVLNIPEFID"
          /besthit="qcoverage 97.1098265895954 , hcoverage 100 ,
          similarity 100 , identity 100 , eval 7.96e-112 ,
          alnlength 168 , Bacteria , Proteobacteria ,
          WP_015589486.1 MULTISPECIES: ribosome maturation factor
          RimM [unclassified Wolbachia]"
gene      14292..14858
          /locus_tag="wEsol_00411"

```

CDS 14292..14858  
 /locus\_tag="wEsol\_00411"  
 /codon\_start=1  
 /transl\_table=11  
 /fullproduct="qcoverage 100 , hcoverage 100 , similarity 100 , identity 100 , evalue 7.39e-130 , alnlength 188 , Bacteria , Proteobacteria , WP\_012673415.1 MULTISPECIES: elongation factor P [Wolbachia]"  
 /pfam="EFP\_N EFP Elong-fact-P\_C"  
 /tigr="TIGR00038 efp 184 translation elongation factor P"  
 /product="elongation factor P"  
 /translation="MAERANDIRPGQVLEHNGGLFLVVGIMHTQPGKGGAYIQAEMKN IKTGAKHYERFRSDATIRRAILDEEEYVYLFTEGNIVNLMHPSNYEQITINLDLLGEK KIYLDQNMKIKVVAYQDKIISAHVDPDYVTLAVKETESVIKQTATASYKPAILENGMR VNVPQFIKEEDKIVVYTPDDSYERVKE"  
 /besthit="qcoverage 100 , hcoverage 100 , similarity 100 , identity 100 , evalue 7.39e-130 , alnlength 188 , Bacteria , Proteobacteria , WP\_012673415.1 MULTISPECIES: elongation factor P [Wolbachia]"

gene 14867..15565  
 /locus\_tag="wEsol\_00412"

CDS 14867..15565  
 /locus\_tag="wEsol\_00412"  
 /codon\_start=1  
 /transl\_table=11  
 /fullproduct="qcoverage 100 , hcoverage 100 , similarity 100 , identity 100 , evalue 3.55e-161 , alnlength 232 , Bacteria , Proteobacteria , WP\_015589485.1 MULTISPECIES: inositol monophosphatase family protein [unclassified Wolbachia]"  
 /cog="SuhB COG0483 260 Archaeal fructose-1,6-bisphosphatase and related enzymes of inositol monophosphatase family"  
 /pfam="Inositol\_P"  
 /tigr="TIGR02067 his\_9\_HisN 252 histidinol-phosphatase"  
 /product="inositol monophosphatase family protein"  
 /translation="MSISSPRINVMLDSVRSASRQLMRDFNELQISNVKSADFINKTYSKSKQTIYDCLHDYKRDYGFISEDDTDQEVKDDTYTWFIMPIEGRENFSSCMVYFAVS VCLIHKNKVVAVIDAPALRETFWAEKKGAFLDFRSRHIKMRVKSREGGLIDVSGN LLNKLPGNSSVRSIGSTILGFAYLAAGRHRGIVYSRVNKYKTLLGRLFLQESGGRLTEDNGLIIAGDIKLG"  
 /besthit="qcoverage 100 , hcoverage 100 , similarity 100 , identity 100 , evalue 3.55e-161 , alnlength 232 , Bacteria , Proteobacteria , WP\_015589485.1 MULTISPECIES: inositol monophosphatase family protein [unclassified Wolbachia]"

gene complement(15557..16759)  
 /locus\_tag="wEsol\_00413"

CDS complement(15557..16759)  
 /locus\_tag="wEsol\_00413"  
 /codon\_start=1  
 /transl\_table=11  
 /fullproduct="qcoverage 100 , hcoverage 100 , similarity 100 , identity 100 , evalue 1.47e-283 , alnlength 400 , Bacteria , Proteobacteria , WP\_174516755.1 5-aminolevulinate synthase [Wolbachia endosymbiont of Cardiocondyla obscurior]"  
 /cog="BioF COG0156 388 7-keto-8-aminopelargonate"

```

synthetase and related enzymes"
/pfam="Aminotran_1_2 DegT_DnrJ_EryC1_Beta_elim_lyase
Cys_Met_Meta_PP_Aminotran_5 Pfam-B_8788"
/tigr="TIGR01821 5aminolev_synth 402 5-aminolevulinic
acid synthase"
/product="5-aminolevulinate synthase"
/translation="MVNYEEIFLNKIKDIKDEGRYREFTHFASLPGRLPHIMDYERNR
EVIVWCSNNYLGMSQNESVIAAIQNSSVGAGGTRNISGTTKEVVELEKSLACLHKKEA
ALTFACGYLANQTTLSTLSSVIPGVVIFSDEKNHSSMIEGIKSGKRPKHIFKHNDVNH
LEQLLKSIDKKTPIIIVLESVYSMDGDVAPLKEICDLADQHNAITYLDEVHAVGMYGS
HGGGIAEREGLMDRITVIQGTLSKAFGVMGGYIASSKSLVDVIRSSAPGFIFTTAMSP
VLAAAKASVEHLKSSNIEREKQKQVVEKVKNSLRNAGINFILTETHIPIIIGDPPEL
SKKASKLLFDEYGIYVQHINYPTVPRGTERFRITPTPYHTDEMIEHLTESLVKVLEKL
SISVACLS"
/besthit="qcoverage 100 , hcoverage 100 , similarity 100
, identity 100 , evalue 1.47e-283 , alnlength 400 ,
Bacteria , Proteobacteria , WP_174516755.1
5-aminolevulinate synthase [Wolbachia endosymbiont of
Cardiocondyla obscurior]"
gene complement(16824..20426)
/locus_tag="wEsol_00414"
CDS complement(16824..20426)
/locus_tag="wEsol_00414"
/codon_start=1
/transl_table=11
/pfam="Pfam-B_18011 Pfam-B_17474 Pfam-B_1200 Pfam-B_13444
Pfam-B_3281 Pfam-B_1200"
/fullproduct="qcoverage 100.083333333333 , hcoverage
103.267411865864 , similarity 96.3 , identity 96.3 ,
evalue 0.0 , alnlength 1201 , Bacteria , Proteobacteria ,
WP_197907087.1 hypothetical protein [Wolbachia
endosymbiont of Kradibia gibbosae]"
/translation="MFGSNFRDFVSQDTSQSQSNSERLIKSWHGFEPDSEDSGIEE
EFEVLDSSESQEIPATPCSTSPEDLSLENAILANFPDGCDSRFTVELKDEDSYGIIPKN
LTFAEIINILNQAIQEDNCEELDKVVQNIEDYEGRSITLDNENLKDFCSNQLNLELQN
RSNHQHIYSNVLSQYKFDQEGFKYDYSVKELVLLAIAANDKLVEQYQDFLFAEENLSL
LPLLVGNNQKYIEAFIEKFHGNDBGVYGRLLKGQAIQLVEPNKIDFFSATALRKEQELLNA
VFVEYVLRDFGQVLKTSKPDPLYGVLETASLIKNEEFITIVLDAFERYINGLTKKAST
EELLKKSFATLLETATISQEHISVIEYLCKRYTNSADHAIYDVYKQAFITDDKVITILRQ
QILKNIGARGRKEIYDLILKTALDAGNIAFIEHLCEKCAKCSNDVIGYLNQKFKNNEF
DNIHESILIALSNVEYTNTDVIVEVLFYTKEIHQNVSHNEQVIRPVIQNILKNATHYS
IGQEDYSLVKEVCYLCTEIDAINIIFREECKIFKSSIEKRIEDLEKENKLLQSEALRE
YNSRLPGIVNGLVQTACIVYDEYTKDPKDNKRQKNIDLIFSLMQIRNILQFSIDVQKY
SCHERQDLWDEMCQTPGTFIIRKRSNNVADELEIPVITSDILSENPGLESTGSQQPQE
NVDRENIMNNEEASIEEAIDNDYRGGKMSRDKKSTKQKMSRNKNSTEQKLLNTIYIP
KTMESYLKRNNIKDEPILKSIIDKVNAEIQKKKEEEKNIINPGPTKKQRCIDQRNTLL
KTRDFLEKKIKSIGTDAKAAVSSVTDVSATTSSHEAPVNIDDEKKQAHQAHPAEHVPEE
SAKLKAQPSNTQEQQKVSETPVPEQTDDIESLSTQDALVLQSKSATVLSIDGEDKQTP
VQPVESESKGDQGGSPPLSPQSSASGDVEGTEASANAAVTTPEEARSLSVSDGEHDKIV
SKEHQDDALEKDLIDFSSDDGNSPLGDPVPTSTNEIPGQEDGTQTTTRQQEPNPIPTP
TPVPTPNLTPTPNPIPTPTPAPTPGLTPDLTQDPILTPTLVPTPNLTPTPNVPTPEP
VPSVANNKSEQVNDTQTNGGLPNNSGKNNAI PQNTKSSKLPVIAASALAIAGIISGVA
VAVYLEMLAVGIAVGACCLVAAAVIYCCTPKSQVENNKVKDPFNTKEASTTVSV"
/product="hypothetical protein"
/besthit="qcoverage 100.083333333333 , hcoverage
103.267411865864 , similarity 96.3 , identity 96.3 ,
evalue 0.0 , alnlength 1201 , Bacteria , Proteobacteria ,
WP_197907087.1 hypothetical protein [Wolbachia
endosymbiont of Kradibia gibbosae]"
gene complement(20465..22360)

```

```

CDS      /locus_tag="wEsol_00415"
         complement(20465..22360)
         /locus_tag="wEsol_00415"
         /codon_start=1
         /transl_table=11
         /fullproduct="qcoverage 100 , hcoverage 100 , similarity
100 , identity 100 , evalue 0.0 , alnlength 631 ,
Bacteria , Proteobacteria , WP_141456863.1 MULTISPECIES:
molecular chaperone HtpG [unclassified Wolbachia]"
         /cog="HtpG COG0326 623 Molecular chaperone, HSP90 family"
         /pfam="HATPase_c_3 HATPase_c HSP90"
         /product="molecular
chaperone HtpG"
         /translation="MHNVQETENLKFDAEVGKVLNIVIHSPLYTNKDIFLRELISNASD
ACDKLRYESQLNPNLLDLDELKITISSNKKNELYITDNGIGMNRQDLIDNLGTIAS
SGTQKFLDAIKNSKDSSQTVELIGKFGVGFYSSFMVASEVIVESRKAGEEESWIWQSK
GDGEYSISKSDNQVPRGKITLIMHPEENEFLDKFRVENIVTTYS DHINFPVEFIDEE
GKSEKLNSKAAIWTKPKNDVTQEEHNDFFRSVAHVGGEPWMILHNKNEGAIEYTNLLY
VPSIKPFDL FHPDRRC SVKLYVNKVFITEDNVQIIPQYLRFLKGIVDSPDLPLNISRE
TLQNNRVVEQIRKSLTKRAISELGKKAKENLEEYTKFWTNFGAVLKEGLCEAMPTDER
EALLSICRFNSTGDEKLISIDDI SRMKPEQEHIIYLTGNSLDSVKNSPQLEGFVSKG
LEVLLFVDPVDDFWTSVIHEYKDKIKSVTRADV DLEKFSSEEDKTDEENKSNGEKTE
ETILQYFTTVLGD SVKSVKISKKLT DSPVCLAVDEGAMDLRMERFLREQQLNYRTPK
VLEINTKHPVIKSIMKSYAESGENPTLED MVHLLFYQACIVEGEEMDDASSFAKRLNN
LLGKISV"
         /besthit="qcoverage 100 , hcoverage 100 , similarity 100
, identity 100 , evalue 0.0 , alnlength 631 , Bacteria ,
Proteobacteria , WP_141456863.1 MULTISPECIES: molecular
chaperone HtpG [unclassified Wolbachia]"
gene     complement(23882..24811)
CDS      /locus_tag="wEsol_00416"
         complement(23882..24811)
         /locus_tag="wEsol_00416"
         /codon_start=1
         /transl_table=11
         /fullproduct="qcoverage 100 , hcoverage 100 , similarity
99.7 , identity 99.7 , evalue 6.81e-218 , alnlength 309 ,
Bacteria , Proteobacteria , WP_015589482.1 MULTISPECIES:
4-hydroxy-3-methylbut-2-enyl diphosphate reductase
[unclassified Wolbachia]"
         /cog="lytB COG0761 294 4-Hydroxy-3-methylbut-2-enyl
diphosphate reductase IspH"
         /pfam="LYTB"
         /tigr="TIGR00216 ispH_lytB 282
4-hydroxy-3-methylbut-2-enyl diphosphate reductase"
         /product="
4-hydroxy-3-methylbut-2-enyl diphosphate reductase"
         /translation="MEIILAEPRGFCAGVKRAVDILAITLEKYKNERQVYVLHEIVHN
KYIVEDFKKQGVVVFVSSIEAIEDNEGILIFSAHGVSKNIEDEAKRKG IQVIDATCPLV
SKVHKEAKRYENSGKELILIGHENHPEVKGIRGRVNNPITLVQTLQDVYDLKVKDPDN
LSYVTQTTLSIDDTHEIIVALKLRFPSITGPDLDICYATQNRQNAVKKLAEIVDMVL
VVGSKNSSNSNRLLDLCTAREKRAYLIDNYRCVNKSWFQGVKEKIGITAGASAPDILVD
ELMDYLKVNLSVKISVMPGGI IENVQFKIPNLV"
         /besthit="qcoverage 100 , hcoverage 100 , similarity 99.7
, identity 99.7 , evalue 6.81e-218 , alnlength 309 ,
Bacteria , Proteobacteria , WP_015589482.1 MULTISPECIES:
4-hydroxy-3-methylbut-2-enyl diphosphate reductase
[unclassified Wolbachia]"
gene     24832..26667
         /locus_tag="wEsol_00417"

```

CDS 24832..26667  
 /locus\_tag="wEsol\_00417"  
 /codon\_start=1  
 /transl\_table=11  
 /fullproduct="qcoverage 100 , hcoverage 100 , similarity 100 , identity 100 , evaluate 0.0 , alnlength 611 , Bacteria , Proteobacteria , WP\_141456705.1 MULTISPECIES: penicillin-binding protein 2 [unclassified Wolbachia]"  
 /cog="FtsI COG0768 599 Cell division protein FtsI/penicillin-binding protein 2"  
 /pfam="PBP\_dimer Transpeptidase"  
 /product="penicillin-binding protein 2"  
 /translation="MQALLKKNKLRSLCFIVPLFIFFYIIIIIFRIFSLTFDQPTTSENFR KDNIVHKQPDILDRNGVVIATNVPTTSLYIDATKVKNPDSIAAQLCSTLHDLEYKNLY RVLTSKKFAWIKRHLTPKELLAIKNAGVPGVNFYDDIKRIYPHSNLSFHVGLGYTDID GNGIAGVEAYISKQHSVIQVPDIQLYECCNLKAIPAQQFPTQQIQCVTLGSRYKNT DKLRDEQRIPETYVKNVNCDEIAHKTGFQCQCTGMTPDQASAQSSVIRQGWSRSADQY VQLSLDTRVQSIVHEELTKAVSRYQALGGVGIVLNVRNSEVISMVSLPDFNPNLQNKAE DVQKFNRASLGVYEMGSVLKYFTIAAALDANATKTSDLVDVSTPITIGKYKIQDFHK SKIPKITVQDIFVKSSNIGAAKIAVKLGIEKQVEYFKAMKLFSPKIEIPEKSTPIIP DKWSENTLITASYGYGIAVTPIHQAQTAALINNGIFHNATLMLNKRISIGEQUIISRT SREMRKLLRAAVTDGTGRKAKIKAYSIGGKTGSAEKVVDGKYSKDANIASFIGVLTML DRYIVLIAIDEPQGMHHTGGVIAAPIVRNIINRVAPILNVTPEM"  
 /besthit="qcoverage 100 , hcoverage 100 , similarity 100 , identity 100 , evaluate 0.0 , alnlength 611 , Bacteria , Proteobacteria , WP\_141456705.1 MULTISPECIES: penicillin-binding protein 2 [unclassified Wolbachia]"

gene complement(26670..26978)  
 /locus\_tag="wEsol\_00418"

CDS complement(26670..26978)  
 /locus\_tag="wEsol\_00418"  
 /codon\_start=1  
 /transl\_table=11  
 /fullproduct="qcoverage 99.0196078431373 , hcoverage 99.0196078431373 , similarity 100 , identity 100 , evaluate 6.60e-69 , alnlength 101 , Bacteria , Proteobacteria , WP\_039963709.1 MULTISPECIES: hypothetical protein [Wolbachia]"  
 /translation="MSDLFYIETTCCVDGQCDVYTGEVSFNDVMLGKFSLNCSGKEA MINLDIITFDINIAIDGQNGKTIKKDLKGLEFVTKDDGSWYINKDFGNDKFEIIVKQL"  
 /product="hypothetical protein"  
 /besthit="qcoverage 99.0196078431373 , hcoverage 99.0196078431373 , similarity 100 , identity 100 , evaluate 6.60e-69 , alnlength 101 , Bacteria , Proteobacteria , WP\_039963709.1 MULTISPECIES: hypothetical protein [Wolbachia]"

gene complement(27154..27861)  
 /locus\_tag="wEsol\_00419"

CDS complement(27154..27861)  
 /locus\_tag="wEsol\_00419"  
 /codon\_start=1  
 /transl\_table=11  
 /fullproduct="qcoverage 100 , hcoverage 100 , similarity 100 , identity 100 , evaluate 2.59e-160 , alnlength 235 , Bacteria , Proteobacteria , WP\_022626165.1 MULTISPECIES: isoprenoid biosynthesis glyoxalase ElbB [Wolbachia]"  
 /cog="ElbB COG3155 217 Uncharacterized protein involved in an early stage of isoprenoid biosynthesis"

```

/pfam="DJ-1_PfpI"
/product="isoprenoid
biosynthesis glyoxalase ElbB"
/translation="MGEKKLKAADVLSGCGHLDGAEVREAVLSLLVLDQQEVDVKCFA
PDINITQVMNHRKTKEATKEKRNVLVEAARIARGEIYDLKEAKAENFDMLVVPGGYGVA
KNLSDLAESKDMVTVMPEFERLVSEFFVTKKPIGAICISPAAIIVSILSSKIGKEESKV
KVTIGDDREQLIERLGGEHIKCDTELSIEDEEHNVFSCSAYMRSDESTYSVYQGIKHM
IDSMVKKINKKTKQPFLL"
/besthit="qcoverage 100 , hcoverage 100 , similarity 100
, identity 100 , evalue 2.59e-160 , alnlength 235 ,
Bacteria , Proteobacteria , WP_022626165.1 MULTISPECIES:
isoprenoid biosynthesis glyoxalase ElbB [Wolbachia]"

```

# ORIGIN

```

1 gatgatagta gtaccttttg tgattgtata gaagacaagc gagtctccag gccagaggat
61 gctgcaatac ttgctgactt gcgtggcatt acaaccaatg ttcttgcaac tttaacacca
121 aaggaagaaa gaattttaag aatgcgtttt ggccttggtg aagatgggaa ggaacatacc
181 ttagaagaag taggaaaaat ttttaatgta acacgtgaga gaattaggca aatagaggca
241 aaagcactgc gcaagttgaa acatccaagc cgtgctagaa aacttagagg gttcttttaa
301 gtatacgtgt caagttaaga agaagctgat tttgcccgga aaaagtggag agcaagttag
361 gccaaagttg tataatttca ccgctatttt tctttttcta tgaatctaata gaaacaacat
421 gctaatactac ggtaaatatt atgacaaaca aaaatgacaa ttctaattca aagtatagaa
481 atttttatgt tctgggtgat agcttatccg ataatggcgc aatcattgga attttaaata
541 atttatcctt tgcaaaaagc gtaaaatttg atgatccttt ttatcaagga agatctttta
601 gcaatggccc tactgctggt gaatatatag caaaatattt agatttagat gaatttaaac
661 ctgggtggag ttattcattt tttgggagat gccacgaaca gcaaggtcag aattacgcag
721 tttcatatgc aacagcatct gaaatttttg accctatttt ttcttatttc ttcaataaat
781 ttcgttttagc taaccagcta gatgcggtaa ttaaacaatca tccagatata ggtaaagaag
841 atttattttg catcataatc ggcggaaatg atgttatggt tgccactgct tatgacgata
901 ctaaagcgga agaagtgttg gaacaagcag tgagtgaat atgtaatgca cttaggttc
961 taaatgaaca tgggtgttaag catgtagtgt tgcaaatgc acctgaagt ggctcaatac
1021 cagcttttaa tagagatgaa gaagcaaggg aactagctac aaagctcacg gagagtttca
1081 atgcaaaact ggctaaaggc ttagattata tgaagaaaag taaaaatctt gaaataaaaag
1141 catttgatct taactctaaa atgagaagta tgttttagcga atacaagagc aaaggtttta
1201 attgtcaaga tgcatgcaca tcgaacattg cagaccaagt tgggagattt aaagaaaata
1261 taaaaatact cttaaagttg atatttaaag gggaaacttg cgttcactat aacctgggt
1321 gtagcaaaga aacactaaag gattatttct tttttgatta tttccatcca actgcggaac
1381 ttcatcatga agttggtaat gaagtgtatg agttgatttg acacagtttt tttgaacata
1441 tccttttaaa tagtaaccag actgcattct gtgattttta gcaaaacacg atctttcatt
1501 tgagctttct tcaattttaa ataaatacag aaaattgctg cctatagcta aactgactta
1561 gatttaccga caatttgaaa aaccgtcatc ccgctactat atagttattg atatatattt
1621 tcttttaagc tcttggtttt gatcgataaa tgtaatcatt tcatcttcta aagttttaat
1681 ttgattacgt aaaattgcaa gaagttcctc tatttgtttg attatagatg tatcagttac
1741 ctggttgatt tgggtttttt gtatttttgc tatttctaca agttggtttc tacgagataa
1801 tttttgtttc aagcaatcaa tattaccatt actaaactgt aaaggagtaa cacgcataatc
1861 tgtattatta atataacgtg agatgatact gcagtctatt ttatcagttt ttgtagtaat
1921 accaaggctt ttagcatagt ctctcccacc ttggttgaat gacgtacact tcaaaaccat
1981 tgcttagtaa agtataggca cataattttt cgtatccacc agttgcctca agaccaattt
2041 tggttacatt atgcaaactg aaaaagtcca gcatctcatc aatggattgt acattgtttt
2101 caaatatttt ataattgctc agtgggtgaa tgtggagatc taatttactt ttgctaacat
2161 caatgccagc aataatgttt gatgaattca taattcctcc gtaataataa catatactgc
2221 attttccagc cttatatacg agcctaaaag ctcaatcagt tgttcggaac tttcagtata
2281 ataaaccaga gaagagaacc ttgctgaaca acgattctta taatcaaggg gcgtgacggt
2341 tcctcttctc tgtgtgtctt taatatcact actttgatat ttataaagac ttgttcttaa
2401 catataaggg aagtgtcctc taggtaagat tgtggagtat tcgttgtagc atttggctgt
2461 tcaattacgc tagttgattc tttaggtata ctatttcctt caaaatttcc atctttttat
2521 tatgttctct ttagcatttt gagagtgaat tattctagtt ttgatattta accgttttgt
2581 atctgctgta atgatttcac ttccaatttg ctatttttta catattgaat tgcaagcact
2641 aacgctttac tcccagaagc tgtggtactg taagctatat tttgcaaaat agcagttctc
2701 ctgatatctt tgctatctga aactgatttc acaccttttg aggtattgat cactagattt
2761 atttttccat ctttgagcat atcaactatg tggggtctgc cttctcttac tttatttaca

```

|      |              |             |             |             |             |             |
|------|--------------|-------------|-------------|-------------|-------------|-------------|
| 2821 | gcttgtgcag   | caatgccgtt  | attgttcaga  | tacgaagctg  | tgccttttgg  | ggcatatatt  |
| 2881 | tcaaaactca   | gttcttttcaa | cattcgtaca  | acaggcaata  | tatactcttt  | atcatcatct  |
| 2941 | tttactgaaa   | ccagagctgc  | tccttctgtt  | ggtaacttgt  | atcctgcagc  | catgtgcact  |
| 3001 | tttgcaagtg   | cagcttcgaa  | agatgagtcg  | attcccatca  | cttctcctgt  | tgatttcatt  |
| 3061 | tcaggaccaa   | gtaaagtatc  | cactcctgca  | aagcgggtaa  | atggaaaaaac | agcagcttta  |
| 3121 | actgcaaaat   | gattgaaagg  | cttgtttttcc | tgattcaatt  | ttttacccaa  | aataacctga  |
| 3181 | gtggcaagct   | ttgcaatagg  | aatattgatt  | accttggaaa  | taaaaggaac  | tgtgcgacta  |
| 3241 | gccctttaat   | tcacttcaag  | tatgtataca  | tcactagacc  | tcttgcataa  | ctcgatttct  |
| 3301 | gaaggcaatt   | ttgtcgtcaa  | agcttgtctg  | cgctcctcaa  | atacattcga  | gtatttctgtg |
| 3361 | gtgctcatct   | gcactttttcc | taaagatttc  | tcatcacaaa  | caggttctgc  | aagaggctca  |
| 3421 | ttctcttgaa   | cagcaaactg  | aatgtttatc  | agacctttca  | cttttaatgc  | taatgctatt  |
| 3481 | ctttcagttt   | gtagcttaat  | ctctttttatt | acttcgtcac  | tcaatgtatt  | tgtcgggtatt |
| 3541 | gagcatgttg   | aatcgccaga  | gtggatacca  | gcttcttcaa  | tgtgctccat  | gaccgctgca  |
| 3601 | atgaaaactt   | tttccccatc  | acatacagca  | tcaacgtcaa  | cctcaactgc  | attgactaaa  |
| 3661 | aattttatcaa  | gaagcagcga  | tccgtgttca  | aaaatttttg  | tttgattcaa  | gacatactct  |
| 3721 | ttgaagctct   | gagtatcgtg  | tctaatecgac | atagactgac  | cgccgaggac  | atatgatggc  |
| 3781 | ctgactacta   | gtggaaaccc  | caccttttct  | gcgttggtta  | acgcttcttc  | tactgaatgg  |
| 3841 | cagatagaat   | tttcagggttg | ttttaaatta  | agttgcaaag  | caagattttt  | aaatctcatg  |
| 3901 | cgatcttctg   | caaggccaat  | agaatcaaac  | gaagttccca  | gaatttttgaa | acctctctcg  |
| 3961 | ttaagcactt   | tggctaactt  | taaagggtgt  | tgaccgccta  | tttgaactat  | tacaccaacc  |
| 4021 | agtgtgccat   | tttcttgctc  | tttacttagt  | atttcaagca  | catcctctgc  | aatgagtggt  |
| 4081 | gcaaaatata   | aacgatcagc  | ggtatcgtag  | tcagttgaga  | cagtttcggg  | attacagttg  |
| 4141 | atcattattg   | tttcataccc  | catttctttg  | gcggcagaag  | ctgcatgtac  | gcatgcataa  |
| 4201 | tcaaaactcaa  | taccttgacc  | aatgcgattt  | ggaccacttc  | ctaaaatgac  | aaccttttct  |
| 4261 | cggtcagaaa   | tattcgctc   | acattccgtt  | ttattttcaa  | catcacctc   | atagcagcca  |
| 4321 | tacatataag   | cagtgtcga   | ttcaaattca  | gctgcacagg  | tgtctacgcg  | tttataaact  |
| 4381 | tgtttaatgc   | caaatttttt  | tcttatttct  | tcgatttggt  | ttactcgatc  | tccagcgtgt  |
| 4441 | aacgctggct   | ggatcccagt  | gtcacgcact  | gggatgacat  | tagagggtac  | tggaatgaca  |
| 4501 | gaggtaggtc   | tattacttaa  | ctttgcta    | cttgcacat   | aaaatcccat  | ttttttcatc  |
| 4561 | tctaacattt   | catatgcagt  | ctcaggaagg  | ccgtttttcct | tgattttttg  | ttcagccaag  |
| 4621 | atgatttgct   | gtatattttg  | cagaaaccat  | aagtcatatc  | ctgtaatcga  | atttatttct  |
| 4681 | tctatgctaa   | ttccgtggcg  | cattgcgtca  | gcagcaatca  | gtaatctggt  | tggtagcaat  |
| 4741 | tttgctaatt   | gagattttat  | gtgatcaata  | tcaatgttct  | caggaaatac  | ttcatcaagt  |
| 4801 | cctgtaaaat   | cagtttcaag  | tgaacggaaa  | gctttctgta  | gtgactcatt  | aaaagtgcgg  |
| 4861 | cctatagaca   | tcacttctcc  | cactgatttc  | atggagggtg  | ataattcaca  | attcttcccc  |
| 4921 | ttaaattttct  | caaactcaaa  | tcgaggaatt  | ttagtgcga   | tataatcaat  | cactggttcg  |
| 4981 | aatgctgctg   | gtattatttg  | agcgcagtcg  | ttacgtattt  | catcgagcga  | atagccgata  |
| 5041 | gcaagtttg    | ttacaacttt  | tgcaatagga  | tagcctgttg  | ctttcgaagc  | aagtgcagaa  |
| 5101 | gagcgagaaa   | cccttggtt   | catttcaatt  | acaacgaggc  | ttccatcttc  | tttaggattt  |
| 5161 | actgcaaact   | gaacatttgc  | accgccggca  | ctaacatcaa  | tttctctcag  | cactgctata  |
| 5221 | gatgcatttc   | tcatttggtg  | atattcagca  | tcacgcagag  | tcaaagcagg  | agcaaccgta  |
| 5281 | atactatctc   | cggtgtgcac  | tcccatcgga  | tcaacatttt  | ctatcgaaca  | gactattatg  |
| 5341 | cagttatctt   | tacaatcgcg  | gataacttcc  | atttcatact  | ctttccagcc  | gataattgat  |
| 5401 | tcatctatct   | gaacttcatt  | tattggcgaa  | attttgagag  | cactttctgc  | gatattgaaa  |
| 5461 | aactcctctt   | tattatatgc  | tatgccacta  | cctgcaccac  | caagagtga   | tgatgaacga  |
| 5521 | atgattgctg   | gtaatccaac  | gtaatccaaa  | gcctttttta  | tttgttcttg  | attttttata  |
| 5581 | atgatacttt   | tgggggtattt | cagtcctatt  | ttatccatgg  | attggcgga   | taactctcta  |
| 5641 | tcctctgctt   | tttttattgc  | ttctctattt  | acccctatta  | attctacgtt  | gtatttgtct  |
| 5701 | aacactccat   | catctgcaag  | ttttattgca  | caattgagcg  | ctgtttgccc  | gcccattggt  |
| 5761 | ggcaatatattg | cgtctggcct  | ctccttaatt  | ataattttct  | ctatgatttc  | aggcagtacc  |
| 5821 | ggctcaatat   | acgtcgcac   | agaaaactca  | ggatctgtca  | ttatagttgc  | ggggttgagg  |
| 5881 | ttaacaaaaa   | tgactttata  | accttcgctt  | tttaataactt | tacagctttg  | cgttccggaa  |
| 5941 | taatcaaact   | cgcacgcctg  | acctataact  | attgggcctg  | ctcctattac  | taatatagat  |
| 6001 | tctatatctg   | tgcgttttcg  | cataattaca  | ataacggtct  | ctattcaagt  | aatgttacca  |
| 6061 | atcttttctg   | tatatgtgaa  | tttttattaa  | acctattagc  | taattacttt  | taggcttgac  |
| 6121 | gcataactgt   | acgaacattg  | caatttgcgt  | ggcagattcc  | agtgccttgac | acacagctgt  |
| 6181 | acaaacattc   | attttttgaag | gtaaattgca  | cagcaaatga  | tgtcattcaa  | gtagctgaca  |
| 6241 | ctggtttcctt  | tatgacggca  | gtgcccagag  | gtgtcatccc  | agtctgggat  | ccagaaaact  |
| 6301 | taacttttaa   | taagtggctg  | cataataaag  | actagattcc  | agtgtcaagc  | actggaatga  |
| 6361 | caccatagag   | gcactgggat  | gacatccttc  | ctagtggaga  | ttactctcaa  | atcacaaatgt |

|      |             |             |             |             |             |             |
|------|-------------|-------------|-------------|-------------|-------------|-------------|
| 6421 | tcatacagtt  | gtgggcttaa  | cggatatctt  | gcagatacta  | tggttaattta | ttcgggagat  |
| 6481 | ttgctaagcg  | gtaagatttt  | tcctgatatg  | ccgcagtcct  | cagaagctaa  | ttccacaaat  |
| 6541 | ttatctgtta  | gtttatcagg  | tgacaccaat  | tcagatccag  | gaaatgcctg  | ctcactaccc  |
| 6601 | acaggtcctt  | ccgtgtatac  | agcattttaca | cataattttg  | tatgttttgt  | ctcagatgca  |
| 6661 | tatatctgca  | ccattatttc  | tagtgcaact  | ttacttgcag  | catacggcat  | ccaatatgga  |
| 6721 | taagaggaag  | gagaaagtgt  | cacttctgag  | gtcatgaata  | tcgctcttcc  | agcattagac  |
| 6781 | tttttttagca | ttggatctaa  | gttttttagt  | aagtaccaat  | tggcagtaaa  | atltgtattc  |
| 6841 | attacgttct  | gtagctcttc  | aatctcacag  | tcatgaatgg  | ggttcagttt  | gcctaaaatt  |
| 6901 | ccagcacaca  | caactaatat  | atcaagtgtc  | ccagattctg  | ataatttcag  | gctttctatc  |
| 6961 | atgtttgtca  | gtatctttac  | attctcaaag  | tctaaaagat  | caagctgaat  | tagtttcaca  |
| 7021 | gagccttctt  | taaattcttc  | aagctcttca  | atltcattat  | atagtggctt  | gagattatca  |
| 7081 | agagatcttg  | aaatcagaat  | cacacatgca  | ccttctctta  | taaacctttt  | tgcaacagca  |
| 7141 | gagcctattc  | cacctgaagc  | tccggtgatt  | aaagctactt  | taccttctaa  | cttaccattt  |
| 7201 | tctttctcct  | tagcgagatc  | cattgaaata  | ttttagctga  | aaattgaatt  | ttgctccata  |
| 7261 | tataaaaaatc | aaacttagca  | tataaaaaaa  | tagtaatgac  | actaccacac  | cacctaaact  |
| 7321 | tccatatatc  | aaatccagtt  | ggtcaaagga  | agcttttaag  | tattgcttaa  | aagctgaagc  |
| 7381 | agaaatcgtc  | caaagaataa  | cagctacaca  | agatccagga  | aatacgtctg  | ataaattttg  |
| 7441 | ttttatgttt  | ggtaacataa  | aatatagcca  | agagactact  | gtgaaaagta  | caaattcaat  |
| 7501 | aagtaaatac  | ctagtataac  | ttagcacctg  | ataggaaaaa  | tcaattagca  | ttggtactag  |
| 7561 | tgtagaaaac  | actatagtta  | gagttataat  | aagcgtgatt  | actaaaaatt  | gtaataactt  |
| 7621 | tagtactctt  | cttaatatat  | aaggcggcga  | aaccggaact  | ttataggcct  | tattgagtat  |
| 7681 | cgttctaagc  | ccttcaattg  | tcgatgaagc  | ggtccaaaca  | gcacctacaa  | ttgctaaagt  |
| 7741 | tagtaagctt  | tgcggcgggc  | ctgatattat  | ctccctaata  | cgcggcatca  | aagatgataa  |
| 7801 | aatatcctgt  | ggcatgttat  | caatgataaa  | taccagacca  | atgttgtagt  | ggtctaaaaa  |
| 7861 | atltgcgaat  | gttgacgcca  | cagccattaa  | aacgatgaga  | aaaggaaata  | ttgataacag  |
| 7921 | aattaaaaat  | gataaatacc  | ctgcatgctc  | cactccatca  | ttatgaattg  | tgtcaatcaa  |
| 7981 | agcacgataa  | aggcaataaa  | cgatgctgta  | aaatttctgt  | agcactgtaa  | tatagacgaa  |
| 8041 | ccaagaaaag  | tattctaaat  | gaaataaagg  | atacttttaa  | gcaaaaaatc  | ctcaccattt  |
| 8101 | acttaaatlt  | aatcaaagtgt | aaggataatc  | cagcattaaa  | tagaaattat  | cggaggcgta  |
| 8161 | atgaaaaatt  | ttcttctact  | tgtggcttta  | attctctcct  | ttgcatttga  | tgcaaatgct  |
| 8221 | gcaaaacttt  | ttgttgatac  | aagtgatata  | acatcatcgg  | tgatatgcaa  | gataataggc  |
| 8281 | tatactcacg  | gcataggcgg  | accgatgatc  | acaatagtga  | taattgggtgc | agcttttgctt |
| 8341 | gcatatttcg  | gcagaatgcc  | atggccagcg  | ctttttgcac  | tcgggtgcgtt | cactgctgtg  |
| 8401 | ttttttggcg  | ctcctgtagt  | cgtttcaaaa  | ataacaccag  | gaggtgtgat  | ttgtaaagac  |
| 8461 | ggtgcagtag  | cggataagta  | atagaaatta  | ttggaggcac  | aaacgtagtt  | ttctttactt  |
| 8521 | gaaagtgggtc | aagctgacca  | ctttcagtggt | ctatgaatac  | ctaataaatt  | ctctttctgt  |
| 8581 | aatcatatca  | gttaaagttt  | agattccagc  | gtcacgcgct  | ggaatgacaa  | ggcttatcgt  |
| 8641 | catgccgccg  | cataccgtca  | taccgcgatt  | cattcgcggt  | atctcatcag  | ctaacaagca  |
| 8701 | gcggaataac  | ggttgtcggt  | tagctatgaa  | tattaagaaa  | tttaccaaatt | gaaaaaaaag  |
| 8761 | gcaaaaagaag | ccccgtgggt  | ggctaattac  | ttacattata  | ctttcaagta  | tggcggtttt  |
| 8821 | ttattctaaa  | cgcttaataa  | ccgcgattca  | gctgctttta  | agccgcaact  | aatctaaatt  |
| 8881 | ataaacatta  | agaaattttac | tgagcgaaaa  | aaaaggcaaa  | gaaaccctag  | ggtggctagc  |
| 8941 | attcaaattc  | tcccttggtca | atltgacgtt  | ttttgctatc  | ttaaacgctt  | tgtaaagcgcg |
| 9001 | tttcagctta  | tataggtaga  | aacctagaag  | ttttataaaag | acatgagggtg | cacatagtgc  |
| 9061 | aaaaatttcag | catgattttac | gccaaataca  | ttaaagttttt | tatcattaat  | ccactgcaga  |
| 9121 | gattgcgaag  | ataaataaat  | agcttcagtt  | tcatgataag  | gggactggca  | aagtttghtaa |
| 9181 | agtaactttt  | gcattttaatt | taaagtaaaa  | aaaacagaaa  | tgttttgggt  | tgaggtttaa  |
| 9241 | ttgccggaat  | ttacaattgg  | gagttgcctg  | tatgagcttt  | gaaagaggta  | ctattcattt  |
| 9301 | gataattcaa  | aaaacttgaa  | agaataaaga  | tagctattga  | aattatcttg  | atlttacatca |
| 9361 | gttatccaag  | tttgacattg  | aatacttaac  | acttcctcca  | ttaacgcctt  | tctgtaatgt  |
| 9421 | ttatccagat  | gagacattat  | atcatcaagt  | agaagaagtg  | gtgccttatt  | gtaatgaata  |
| 9481 | caccttgctt  | ttacactgga  | taaaataata  | gaaagcagta  | ataacttttg  | ttctccagtg  |
| 9541 | gagcacagat  | ttattgggtac | gtttcttttt  | tgacaaaaaa  | cccggaattt  | atcgttatgc  |
| 9601 | acaccaagggt | ttactctacc  | agtcaatgaa  | tctttttctc  | tgtttttctt  | tagacgattc  |
| 9661 | tgaaaaatatt | ctgcagtatc  | gtccaaagtt  | agctggctgc  | tgaatttcaa  | acttgccctt  |
| 9721 | ggaaaaagct  | tactggaatg  | gttatcaatt  | gtatcttgta  | atatttttaa  | aacagacgat  |
| 9781 | cgcatatgta  | aaataactaac | tgcattaacg  | gccattatgt  | tttcaagact  | agagaaccag  |
| 9841 | tttttgttca  | aaatgttctc  | cctcaatagt  | ttacttcgct  | catgttttagc | ttttctatat  |
| 9901 | ttcatgtagc  | agcaagtgtg  | atlttcttca  | aacagtgaat  | ctatacgggtc | taaaaatttt  |
| 9961 | aatctgtcac  | ttggagaatt  | aagaagaaca  | tagtccattt  | gtggaatcag  | ccatattaca  |

|       |             |             |             |             |             |             |
|-------|-------------|-------------|-------------|-------------|-------------|-------------|
| 10021 | ttggatatct  | tatacagaga  | tgaataactt  | gattgcgttt  | ttccatcaat  | ttgtattagt  |
| 10081 | ttcttatcaa  | aactctttgc  | gataccaatt  | gaattaaaaat | ccgttccatt  | aaaaaaatca  |
| 10141 | tagtgcacta  | cccaatcttc  | attactgaat  | ctattttgta  | tctcactggc  | ttttgctttt  |
| 10201 | ttcattccat  | tgcttttagc  | aagcaacgag  | attgcttcaa  | gtatattagt  | tttaccaata  |
| 10261 | ccatttttcgc | cagttattac  | aactgagcta  | tcatctgaat  | ccagttcaaa  | gtttgagtgg  |
| 10321 | ctacgaaaat  | tatgtaattt  | cagctttttt  | atgtagcaat  | gggtagccat  | taacctattc  |
| 10381 | tttaattttat | attctcttta  | cttcttccag  | aacctcatca  | acatgtccac  | taactttttac |
| 10441 | atttttccag  | atcttcacta  | ttttaccttt  | tttatctatt  | aaaaaagtag  | tgcgttctat  |
| 10501 | tcccatatac  | tttttgccaa  | acatactttt  | ctctacccaa  | acaccatatt  | ttcccaacat  |
| 10561 | ttcagcattc  | tcatcagaaa  | ctaaagaaaa  | cggcagagag  | tattttgctt  | tgaagttagt  |
| 10621 | gtggcactta  | acactatctt  | ttgatacacc  | aattatcact  | gtgtcaaggg  | aagaaaaatc  |
| 10681 | atctatttta  | tctctaaagc  | cttttgcttc  | catcgtacaa  | cccggagtat  | cgtcttttagg |
| 10741 | ataaaaaataa | agagctacat  | tttttttatc  | aaaaaattca  | ctcagtata   | aattttcacc  |
| 10801 | agaatctggt  | ggtaaactaa  | aatcaggtgc  | attatttcct  | actactaact  | ccataccttg  |
| 10861 | ctccattaat  | aacgcttcta  | tctatagtag  | tatattgtag  | tcagagtatc  | aaattttata  |
| 10921 | tatagctaac  | acagataaga  | ttcttgatag  | ggggcttatt  | gataactgcc  | ttctcggctt  |
| 10981 | gccgcttttg  | ataaagtgtg  | gttttcgtct  | gatgtaaggc  | catatcaaat  | agatcctatt  |
| 11041 | aaaaatcaat  | cgaatcttca  | catgtttggt  | cttcataaaa  | gaagttcaat  | gttatcgtag  |
| 11101 | taccaagttt  | cgcttcactt  | ttaatgtcaa  | aagttccacc  | cattaactct  | actaatttct  |
| 11161 | tgcttagcgg  | taatccgatg  | cccgtacctt  | cgtttctata  | tcccgaatct  | gcttggccaa  |
| 11221 | aaacagacat  | aactttatat  | atatcctgct  | gcattattcc  | tattccattg  | tcatgaaact  |
| 11281 | caatgggttaa | taagtttttt  | tctatatttt  | cttttatcac  | cattcttatt  | aaaccatctt  |
| 11341 | taggagtaaa  | cttgattgag  | tttgataata  | aatttattat  | aacttgtttc  | attctcttgg  |
| 11401 | aatctgcaat  | gactaataat  | tgtttattag  | tcatctcttt  | ttttaaatata | atccctgctt  |
| 11461 | cttttaattt  | aggtaatagc  | atattttacgc | atgaatctat  | tattttgttc  | agggttaaact |
| 11521 | tcactttttc  | tactgttaaa  | ctacttgatt  | cagcttttaga | aaaatcgagc  | acatcattaa  |
| 11581 | ttaaggcaag  | taagtgtgtc  | cctgcattat  | atataatcgtc | tgcatactcc  | ttgtattgag  |
| 11641 | agttatccat  | tgaacctaaa  | gtttcatttt  | tgatcaactc  | tgcaaatcca  | ataatagcat  |
| 11701 | taagaggtgt  | gcgtaattca  | tgtgtaacgc  | ttgcaaaaaa  | cttttagcttg | tttgcatttt  |
| 11761 | cttgctctaa  | tgccctctttt | atctgctgta  | attcaatggt  | agttttatgt  | tgcttggcca  |
| 11821 | gcatttttgg  | attagaaaag  | tgcaaataga  | acattattaa  | tattaaaatt  | attaataata  |
| 11881 | agcctaaaaa  | tattaaaaat  | aggccatatg  | ctataacata  | agaattattg  | tagcttcgaa  |
| 11941 | gaatcttcaa  | aaaaaacgac  | ggcttagcgc  | tattttcatg  | gaatataggg  | aaaatagaag  |
| 12001 | ttaatgtatt  | tcctgtagta  | taaagtattt  | cttggttact  | taataattta  | tcaatttcat  |
| 12061 | cgtttgtaag  | taactgttca  | taatcataat  | cttgagtgtt  | aaaattactg  | aatattattc  |
| 12121 | tgccgttttg  | atcatacagt  | attaagctga  | aatcctttac  | tttgctcact  | gattgtaata  |
| 12181 | attcagcacg  | cagtttttact | agttggttta  | tgtagccaaa  | atttttgtat  | ttaatgtgat  |
| 12241 | gcttttctat  | tagtaaataa  | tggtattttt  | ttattatacc  | attttctaata | acacttttta  |
| 12301 | agttttacact | tgaatcacgg  | taagaagaaa  | ggaaattact  | ccttagtaaa  | taattacaat  |
| 12361 | atatcacact  | gaataaaaatc | ataaaaaattg | atgagaataa  | tgcgataact  | tttgtgtatt  |
| 12421 | tgtttttccc  | agtgcgagaaa | acattaattt  | acctatctta  | tacatatcct  | tactcattgc  |
| 12481 | gaaacaacgg  | ctttttatgtt | attaataata  | aaatttagca  | tataatatatt | tatgacaatt  |
| 12541 | tctcctatatt | tgccagttta  | ttctcctatt  | aacataaatt  | tttcttatgg  | taaagatatt  |
| 12601 | tacttgtagt  | atattgacgg  | taagcgctac  | gtagattttc  | actccggaat  | agccgttagt  |
| 12661 | agcttaggtc  | acactaattc  | gcgattaatt  | agtgtctcta  | aattgcaagg  | agaaaaatta  |
| 12721 | tggcatatat  | caaataccta  | taatatacct  | gctgccaaata | attttgacaga | aaaaattaata |
| 12781 | aacaatagtt  | tcgctgacac  | tgtatttttc  | tcaaatcttg  | gatcagaggc  | agtagaatgt  |
| 12841 | gggcttaaga  | ttgctagggt  | ctatcaaaaac | ggaaaaggca  | ataaaaaaccg | tcacagaatt  |
| 12901 | ttaacattcc  | atggtgcatt  | tcatggaaga  | accttcctaa  | cttgtgtctg  | aaacgataaa  |
| 12961 | cagaaatttt  | ctgaattact  | gagtcctctgt | attgattggt  | gtgataatat  | cgagcccaat  |
| 13021 | attgagagtg  | taaagaaaagc | aattttcaagt | gatataaggcg | ttatatatta  | agaaccaata  |
| 13081 | caagggcaag  | gtgggtatcaa | agtaatgaat  | gaagtcttta  | tgaaagaact  | aagaaagctg  |
| 13141 | tgtgatgaaa  | atgacataatt | gttatttttt  | gattgcgtgc  | aatgcggtgc  | tggtaggaca  |
| 13201 | ggaaaattat  | ttgcatacga  | acatatagga  | gtggaacctg  | atatatgtgc  | tcttgcaaag  |
| 13261 | ggaataggcg  | gcgggtttcc  | gctaggggct  | tgtcttgcca  | ctgaaaatgc  | tgctaaatac  |
| 13321 | atggcagttg  | gtatgcacgg  | ttccactttt  | ggtggcaatc  | cgcttgcaac  | ctcagtaggt  |
| 13381 | aatgctgtgt  | tcgaagaatt  | gctcagtcct  | ggctttttga  | aaaatggtga  | aattagaggt  |
| 13441 | aagtatttta  | aaaataaatt  | agaagactta  | gcaagtaaat  | ttccaataat  | agaagaagtg  |
| 13501 | agagggaaag  | ggttaatgct  | tggaaataaaa | gtgaaagcag  | acaatcaaaa  | atttgcagaa  |
| 13561 | gagttaagtc  | atcgtgggtt  | actcactggt  | ggagtaacat  | cagataacgt  | tgtgagaatt  |

|       |             |             |             |             |             |             |
|-------|-------------|-------------|-------------|-------------|-------------|-------------|
| 13621 | ttacctccac  | taattatcac  | tgaaaaagag  | attgataaag  | gaattgagat  | tctgggtcaa  |
| 13681 | tattttatctg | agaaatcttc  | tgattagatg  | cttgatatta  | atatgaacga  | caatctggta  |
| 13741 | tgcttaggaa  | ttattacctc  | tcctcacgga  | attaaaggag  | ctgttaaatt  | aaaaactttc  |
| 13801 | accgaaaagc  | ccaaaaatat  | ctccttatat  | ggtgagctaa  | taagtgggtga | tgagaattat  |
| 13861 | aaaatagact  | cagtatccat  | cataggtgat  | aatttagtaa  | tagctacaat  | aagtggagta  |
| 13921 | aattcccgtg  | atgaagcaga  | gcttttgagg  | aataagaagc  | tatatataga  | aagaagcaag  |
| 13981 | ttaccagagc  | taaatgatga  | ggatgaattt  | tatcaaagtg  | accttgtaga  | tatggaagta  |
| 14041 | aggctggaaa  | gtaatgaatt  | atatggcaat  | gtaaaatctg  | tgtataattt  | tggctcaggg  |
| 14101 | gatataattag | aaatttttagt | tatcagcaca  | aaaaaacgta  | ttatgctgtc  | tttactataa  |
| 14161 | gagatatttc  | cacatataaa  | tataaagggg  | aggtatatag  | tattaaatat  | accagaattt  |
| 14221 | attgactaat  | aaagactttg  | atattttatat | aaagctattt  | ataattataa  | gatcaaattg  |
| 14281 | aaaatgtaat  | tatggcagaa  | agagctaacg  | atatcagacc  | aggtcaggtg  | ttggaacata  |
| 14341 | acggcggatt  | atttttggtt  | gtaggtatta  | tgcatactca  | acctggtaaa  | ggtggtgcat  |
| 14401 | acatacaagc  | cgaaatgaaa  | aacatcaaaa  | ccggagcaaa  | acactatgaa  | agatttcggt  |
| 14461 | ctgatgcaac  | aatcagaagg  | gcaatttttag | atgaagagga  | atatgtttac  | cttttactg   |
| 14521 | aaggaaacat  | tgtaaatctt  | atgcatccaa  | gtaattacga  | gcaaatacct  | ataaatttgg  |
| 14581 | acttattggg  | agaaaaaaaa  | atttattttac | aggataacat  | gaaaattaaa  | gttgtagctt  |
| 14641 | atcaagacaa  | aataattttct | gcgcatgtgc  | ctgattatgt  | tacacttgct  | gtgaaagaaa  |
| 14701 | cagagtctgt  | tattaaagga  | caaactgcta  | ctgcttctta  | taagcctgca  | attttggaaa  |
| 14761 | acggaatgcg  | cgttaacgtg  | cctcagttta  | taaaagaaga  | ggataaaaatt | gtagtatata  |
| 14821 | ctccagatga  | cagctattat  | gaaagagtga  | aagagtaaaa  | agaagaatgt  | ccatctcatc  |
| 14881 | accacgaatt  | aatgtgatgc  | ttgattctgt  | gcgtagtgct  | tccaggcagc  | ttatgcgcga  |
| 14941 | ttttaatgaa  | ttacaaattt  | ctaattgttaa | atcagcagac  | tttatcaata  | aaacttattc  |
| 15001 | aaaatccaag  | caaaccatat  | acgattgctt  | gcacgactac  | aaacgagact  | atgggtttat  |
| 15061 | ttccgaagat  | gatactgatc  | aagaagtaaa  | agatgacact  | tataacctgg  | ttattatgcc  |
| 15121 | tatagagggc  | aggggagaact | tttccagttg  | tatgggtttat | tttgcagtat  | cagtctgtct  |
| 15181 | cattcataaa  | aataaagttg  | tggcggctgt  | aattgatgct  | ccggctctta  | gagaaacttt  |
| 15241 | ttgggcagaa  | gaaaagaaaag | gtgcttttct  | tgaggacttt  | agatctcgtc  | atataaaaaat |
| 15301 | gcgggtgaaa  | agccgtgaag  | ggggtctaata | agatgtaagt  | ggtaattttgt | taaataaatt  |
| 15361 | gctgcctggc  | aatagtagtg  | tacgctccat  | cggttcaaca  | attttaggct  | ttgcataacct |
| 15421 | tgcggcagga  | aggcacagag  | gaatagttta  | ctctagagtt  | aacaaatata  | aaaccttgct  |
| 15481 | cggtagactt  | tttctacaag  | aaagcgggtg  | aaggctaacg  | gaagacaacg  | gattgattat  |
| 15541 | tgctggcgat  | attaaattag  | gataaacaag  | ctacagagat  | agacaacttt  | tcgagaactt  |
| 15601 | ttacaagaga  | ttctgtcaaa  | tgttctatca  | tttcatcgg   | atgataagg   | gtaggggtaa  |
| 15661 | tacggaaacg  | ctcagttcct  | cttggaaactg | tcgggtaatt  | tatatgttga  | acgtatattc  |
| 15721 | catactcatc  | aaataataat  | tttgatgctt  | ttttggataa  | ctctgggtcg  | ccaattatta  |
| 15781 | ttggaattat  | atgagtttct  | gttaaaatga  | agttaattcc  | tgcattttctc | agtgagtttt  |
| 15841 | ttactttttc  | aacgacttgc  | ttttgctttt  | ccctttcaat  | gttgcttgat  | tttaggtgtt  |
| 15901 | caacgcttgc  | ctttgctgcc  | gctgctaaaa  | caggcgacat  | agcagtggta  | aaaataaatc  |
| 15961 | ctggagcgga  | acttcttatt  | acatctacca  | agctctttga  | agacgcgata  | taccaccca   |
| 16021 | tcactccaaa  | agccttcgat  | agtgtacctt  | gaataacggt  | tattctatcc  | atcaggcctt  |
| 16081 | ctctttctgc  | aattccacca  | ccatgtgaac  | catacatacc  | aactgcgtgc  | acctcatcca  |
| 16141 | aataggtaat  | tgcattatgt  | tgatctgcca  | ggtcgcata   | ttctttaagc  | ggagctacat  |
| 16201 | caccatccat  | tgaatatacg  | gattcaagta  | ctatgatttt  | tgggtgtctt  | ttgtctatag  |
| 16261 | acttaagtag  | ctgctctaga  | tgattaacat  | cattgtgttt  | aaatatatgt  | tttggccttt  |
| 16321 | ttcctgattt  | tatgccttct  | atcatcgaag  | aatggttctt  | ctcgtctgaa  | aaaattacta  |
| 16381 | cgcccggaa   | aacagacgat  | aaagtgctaa  | gtgttgctctg | gttagcgagg  | tagccacaag  |
| 16441 | caaaagttaa  | agcagcctct  | tttttatgca  | aacaagctaa  | ggatttttca  | agttcgacaa  |
| 16501 | cctcttttgt  | tgtaccagat  | atatttcttg  | ttcctccagc  | accaacagat  | gaattttgga  |
| 16561 | tagcggcaat  | tacactctca  | ttttgtgaca  | ttcccaaata  | gttattactg  | caccagacga  |
| 16621 | ttacttccct  | atttctttca  | tagtccataa  | tgtgggggag  | cctacctggc  | aatgacgcaa  |
| 16681 | agtgcgtaaa  | ttcacggtag  | cgccctcat   | cttttatatc  | ttttatttta  | ttcaagaata  |
| 16741 | tttcttcgta  | gtttaccaag  | tccttattta  | ccgataatta  | acataattat  | aataaattat  |
| 16801 | taaatggtaa  | actacaatat  | ttattataca  | gatacggtag  | tagatgcttc  | cttcgtgttg  |
| 16861 | aaaggtttgt  | caaccttgtt  | gttttcaact  | tggcttttag  | gtgtacagca  | gtatataact  |
| 16921 | gcagcagcaa  | ccagacaaca  | agctccaact  | gctattccta  | ccgctaacat  | ttccaagtaa  |
| 16981 | actgcaacag  | ccacccttga  | aataatacca  | gctattgcaa  | gtgcagaagc  | agctataaca  |
| 17041 | ggcagcttac  | tactttttgt  | attttgtgga  | atagcattat  | ttttgcctga  | attattaggc  |
| 17101 | aacccgccat  | tggtttgagt  | atcattccacc | tgctcagatt  | tgttgtttagc | tactgaaggc  |
| 17161 | actggttctg  | gtgttggcac  | tggattcggg  | gttggtgtta  | gattcgggtg  | tggcaccagc  |

|       |            |            |             |             |             |             |
|-------|------------|------------|-------------|-------------|-------------|-------------|
| 17221 | gtaggtgtta | gaattggatc | ttgtgttaga  | tccggtgtca  | gtcctggcgt  | tggcgccggc  |
| 17281 | gtaggtgttg | gaattggatt | cggtgttggt  | gttaggttcg  | gcgttggcac  | cggtgtaggt  |
| 17341 | gttggaattg | gattcggttc | ttgctgcctg  | gtggtagttt  | gagtaccatc  | ttcttgtcca  |
| 17401 | gggatttcgt | tagttgatgt | aggtactgga  | tctcctagag  | gactattgcc  | atcatcactt  |
| 17461 | gaaaaatcta | ttaaactctt | ttctagtgc   | tcatcttggt  | gctctttaga  | cacgatttta  |
| 17521 | tcatgctcac | catcactcac | aagactacgt  | gcttcttcag  | gcgtagtta   | tgctgcatta  |
| 17581 | gcagaggctt | ctgtaccttc | aacatcacca  | ctcgcagaac  | tctgtggtga  | aagtgggtgt  |
| 17641 | gaaccttggt | gatcaccttt | actttcagac  | tctaccgggt  | gaacaggagt  | ttgtttatcc  |
| 17701 | tcaccatcaa | ttgataacac | ggtagcactt  | ttactttgaa  | gaacaagagc  | gtcctgtgta  |
| 17761 | cttaaacttt | caatatcatc | cgtttggtct  | ggaactggag  | tctcagaaac  | tttttgttgc  |
| 17821 | tcttgagtat | tagaaggctg | tgcccttaagt | tttgcacttt  | cttctgggtac | atgttcagca  |
| 17881 | ggttgagcat | gagcttggtt | tttctcatca  | tcaatattaa  | caggagcttc  | gtgactactt  |
| 17941 | gtagtagcgc | taacatcagt | tactgatgat  | acagcagcct  | tagcatcagt  | tccaatgctt  |
| 18001 | ttgatctttt | tttcaagaaa | atctctagtt  | tttaagagtg  | tgtttctctg  | atcaatgcat  |
| 18061 | ctttgcttct | tagtaggacc | tggtattgata | atgttcttct  | cctcctcctt  | cttcttttga  |
| 18121 | atttcagcat | ttactttgtc | tatgatactc  | ttcaaaaatag | gttcatcttt  | tataattatc  |
| 18181 | ctttttaagt | aactctccat | cgtcttagga  | atgtagatag  | tattcaacaa  | tttctgctct  |
| 18241 | gtgctgtttt | tatttctaga | cattttctgc  | tttgtacttt  | ttttatctct  | agacatttta  |
| 18301 | ccccccctat | aatcattatc | tatagcttct  | tctattgaag  | cctcttcatt  | gttcataata  |
| 18361 | ttttctcgtc | tgtccacatt | ttcttggtgt  | tggtgactgc  | cagtactttc  | aagtcctgga  |
| 18421 | ttttctgata | gaatgtcact | tggtataact  | ggaatttcta  | attcatctgc  | aacgttatta  |
| 18481 | cttctttttc | gtattataaa | agttccagga  | gtttggcaca  | tttcatccca  | caaactctga  |
| 18541 | cgttcatgac | aggaatat   | ttgcacatca  | atagaaaatt  | gcagaatatt  | tctaatttgc  |
| 18601 | attaaactga | atattagatc | aatattcttt  | tgacgtttat  | tgtcttttgg  | atcttttagtg |
| 18661 | tattcatcat | acactatgca | agcagtctga  | actaatccat  | ttacaatacc  | tggaagacgg  |
| 18721 | ctgttatatt | cacgtaaagc | ttcagattgc  | aataatttgt  | tttccttttc  | cagatcttct  |
| 18781 | atgcgctttt | ctatgctaga | tttaaaaatc  | ttacactcct  | ctcgaaaaat  | tatgttaatt  |
| 18841 | gcatcaat   | ctgtgcataa | gtaacatact  | tccttgacta  | aggagtaatc  | ttcttggcct  |
| 18901 | attgagtagt | gtgttgcat  | tttcagtata  | ttctgtatga  | ccggccta    | cacttgctca  |
| 18961 | ttatgtgata | cgttttgatg | gatttcttta  | gtgtaaaaaa  | gcacctcgac  | tataacgtct  |
| 19021 | gtgtttgtgt | attcaacatt | agacaatgca  | atgaggattg  | attcgtgtat  | gttatcaaat  |
| 19081 | tcgttat    | ttaaattttt | attgagatag  | ccgataacat  | cattgctgca  | tttagcacat  |
| 19141 | ttttcacaca | agtgtctgat | aaatgcaata  | ttaccagcat  | ccaatgcagt  | tttcagaatt  |
| 19201 | aaatcataaa | tttcttttct | gccacgagct  | cctatgtttt  | tcaggatttg  | ttgccttagt  |
| 19261 | attgtaataa | ctttatcatc | tgtaaatgct  | tgtttatata  | catcgtaaat  | ggcatgatct  |
| 19321 | gcactattag | tgtatcggtt | gcacaagtat  | tcaatgacag  | atatgtgttc  | ttgacttatc  |
| 19381 | gcagtttcta | acaaggtagc | aaagctcttt  | tttaataact  | cttctgttga  | ggctttttta  |
| 19441 | gttagcccat | taatatatct | ttcaaatgca  | tccagcacta  | tcgtgatgaa  | ttcttcattt  |
| 19501 | ttgatcagag | acgctgtttc | aagcacacca  | tacaaaaggat | caggtttact  | tgtttttaac  |
| 19561 | acctgtccaa | aatctcttaa | aacgtattcg  | acaaaaactg  | catttaataa  | ttcttgctct  |
| 19621 | tttcttaatg | ctgtagctga | gaagaagtca  | atcttattag  | gttcgacaag  | ttgtatagct  |
| 19681 | tgacctttta | atcttccgta | aactccatcg  | ttaccatgga  | atctttctat  | aaaagcttca  |
| 19741 | atataat    | gattaccaac | aaggagaggt  | aaaagactta  | agttttcttc  | agcaaaaaga  |
| 19801 | aaatcctgat | attgctctac | tagcttgtca  | ttagctgcaa  | ttgccaatag  | taccaattct  |
| 19861 | tttactgaat | aatcatactt | gaaaccctct  | tgatcaaatt  | tataattgtga | tagtacattt  |
| 19921 | gaatatatat | gttgatggtt | gcttctgttt  | tgtaactcca  | aattaagt    | atttgaacag  |
| 19981 | aaatctttga | gattttcatt | atccagcgta  | atagacctgc  | cttcataatc  | ttcaatattt  |
| 20041 | tgtacaacct | tgtctaattc | ttcacaatta  | tcttcttgta  | tagcttgatt  | taagatattt  |
| 20101 | ataatctcag | caaaagttaa | gttttttagga | atgataccat  | atgaatcttc  | atcttttaac  |
| 20161 | tctacagtaa | acgacctatc | acaaccatca  | ggaaagt     | caagtattgc  | attctctaaa  |
| 20221 | cttagatctt | caggggatgt | actacatgga  | gtagctggta  | tctcttgact  | ttcgctatct  |
| 20281 | aaaacttcaa | actcttcttc | aatacctgaa  | tcttcagaat  | ctggtttttc  | aaaaccatgc  |
| 20341 | caacttttga | ttaatctttc | agaatttgat  | tggccctgtg  | aagttgtatc  | ttgtgataca  |
| 20401 | aagtctctaa | aattggaacc | aaacatgttt  | tacctcctaa  | ctagcagcta  | agctaagtat  |
| 20461 | agcattaaac | agaaatcttg | ccaagcaaat  | tattcagtct  | cttagcaaa   | ctgctcgcgt  |
| 20521 | catccatctc | ttcgccttcc | acgatgcaag  | cttggtaaaa  | caataagtga  | accatgtcct  |
| 20581 | ccaatgttgg | gttttcacca | ctttcagcat  | aagatttcat  | tatactcttt  | attacaggat  |
| 20641 | gcttagtggt | aatttcaagc | acctttggcg  | tgcggttaatt | tagctgcttt  | tgttcacgca  |
| 20701 | aaaaacgctc | catgcgaaga | tccatagcac  | cttcatcaac  | cgctaggcat  | acgggactat  |
| 20761 | cagtcaat   | tttggaatt  | tttacgcttt  | ttactgaatc  | tccaagcact  | gtggtaaaat  |

|       |             |             |             |             |             |             |
|-------|-------------|-------------|-------------|-------------|-------------|-------------|
| 20821 | attgcagtat  | agtttcctca  | gttttttctc  | catttgattt  | attttcttca  | tctgtcttat  |
| 20881 | cttcttctga  | agagaatttt  | tccaaatcaa  | catctgcacg  | ggttacagac  | ttgattttct  |
| 20941 | gatcttttgta | ttcatgaatt  | acactagtcc  | aaaagtcac   | aactggatca  | acaaatagga  |
| 21001 | gcacttctag  | tcctttactg  | acgaatccct  | caagttgcgg  | actgtttttc  | actgaatcga  |
| 21061 | ggctatttcc  | ggtgagataa  | tagatatgtt  | cctgctcagg  | cttcattctg  | cttatataat  |
| 21121 | catcaatgct  | gatcaacttc  | tcataccggg  | tgctattaaa  | tctgcaaatt  | gagagcagcg  |
| 21181 | cttctctctc  | atcagttggc  | atagcttcgc  | aaagaccttc  | ctttaaaact  | gcacccaaat  |
| 21241 | tggtccagaa  | ttttgtgtac  | tcctctaaat  | tctcttttgc  | ctttttaccg  | agctctgata  |
| 21301 | tcgcgcgttt  | agtgagggat  | ttcctgattt  | gctcaacaac  | acgattattc  | tgcaacgttt  |
| 21361 | ctctgctgat  | attaagaggt  | aagtcgggtg  | aatcaacaat  | acctttcaag  | aaacgtaaata |
| 21421 | actgcggtat  | gatctgtaca  | ttatcttcag  | tgataaatac  | tttattttaca | tataacttaa  |
| 21481 | cagagcaacg  | tctatctgga  | tggaataaat  | caaaagggtt  | tatagaagga  | acataaagca  |
| 21541 | aatttgtata  | ttctattgca  | ccttcatttt  | tattatgcaa  | tatcatccag  | ggctccccgc  |
| 21601 | caacgtgggc  | aacactgcgg  | aaaaaatcgt  | tgtgctcctc  | ttgagtaacg  | tcattttttg  |
| 21661 | gcttagtcca  | aattgcagcc  | ttactgttta  | acttttctc   | ttttccttct  | tcgtctataa  |
| 21721 | attcaacagg  | aaaatttatg  | tgatcagagt  | aagtagtgac  | aatattttca  | acacgaaatt  |
| 21781 | tatctaaaaa  | ctcgttttct  | tcaggatgca  | taatgagcgt  | aattttgggt  | ccgcgagggga |
| 21841 | cttgattatc  | tgacttgctg  | attgaatatt  | ccccatctcc  | tttggttgct  | cagatccaag  |
| 21901 | actcctcttc  | tcagcttttt  | ctcgattcta  | ctattacttc  | tgatgcaacc  | ataaagcttg  |
| 21961 | agtaaaaaac  | aacaccaaac  | ttcccaatca  | gctccacagt  | ttggcttgaa  | tccttgctat  |
| 22021 | tcttaatcgc  | atccaagaac  | ttttgcgtac  | cagagcttgc  | aattgtacca  | agattgtcta  |
| 22081 | ttaaatacctg | tctattcatt  | ccaatgccat  | tatcagtgat  | atatagctcg  | ttcttatctt  |
| 22141 | tattggagct  | gatagtgatt  | tttaattcgt  | cactcaaatac | tagcaaatta  | gggttttagtt |
| 22201 | gagattcata  | gcgcaactta  | tcacatgcat  | ctgatgcatt  | tgatattaat  | tcacgcagaa  |
| 22261 | aatgtctttt  | attgggtgtaa | agtgaatgaa  | tcactatatt  | cagtactttc  | cctacctcag  |
| 22321 | cgtcaaat    | taaattttca  | gtttcttgta  | cattatgcat  | tttgagctcc  | attatttgcc  |
| 22381 | tactacccta  | ataatttaag  | tattgaatca  | cgatctttca  | aggtcacgta  | cacccaaatt  |
| 22441 | aatgtgggtg  | tagttattat  | gacacccaat  | ttatgggatc  | tcttgcataa  | caaaacttttg |
| 22501 | gcagcgcatt  | ggatgaaacg  | aaaaacttcc  | ttgacaccct  | tcgccagccc  | ccttatcatg  |
| 22561 | aaactgaagc  | tatttattta  | tcttcgcaat  | ctctgcagtg  | gattaatgac  | aaaaaaactt  |
| 22621 | aatgtatttg  | gcgtaaatca  | tgcttaattt  | tttgcaactat | gtgcacctca  | tgtctttatc  |
| 22681 | aaattttctag | ctacacaagc  | tgaaatacgc  | tattttaaaac | atcaaaaaaac | gccaaacttaa |
| 22741 | aaaatggata  | gtgaataaatt | agctacccta  | gggttttctt  | gcctttttttt | ctgcttagta  |
| 22801 | aattttcttaa | cgttttataat | ttagattagt  | tgcggtcttaa | aagcggctga  | gtcacgggta  |
| 22861 | ttaagcgttt  | agaataaaaa  | aacgccatac  | ttgaaagtat  | aatgtaagta  | actagccaac  |
| 22921 | catcgggctt  | tttttgcctt  | ttttttcgct  | tggtaaattt  | tttaataactt | agattagttg  |
| 22981 | caattttaaga | gaccagaaat  | ggtcagtgct  | tggtcactgga | ataacgtcct  | cctttgttat  |
| 23041 | cccagtgccc  | agacactggg  | atccaggaaa  | cttaattgca  | agtaatgcat  | tagatttgggt |
| 23101 | gagtatgggt  | tttatgttat  | agaatgaaac  | acttttgggtg | aatttgtaaa  | gaaaactgga  |
| 23161 | tcccagtggt  | tgggcactgg  | gatgacagca  | gtcctacgtc  | ataccgccgc  | gaaccgtcat  |
| 23221 | accgcgattc  | attcgcggta  | tctctagatc  | ccgctaacaa  | gcagcgggat  | gacgattgtc  |
| 23281 | gtttagccat  | aaacattaag  | aaattttacca | aacgaaaaaaa | aaggcaaaaag | aagccctggg  |
| 23341 | gttattatcc  | gcttttaaaat | attggcggtt  | tttatgtttt  | aaacgcttga  | caagcgaaat  |
| 23401 | tcagctgctt  | ttaattgcaa  | ctaacttacg  | ctgcaaatgt  | ttaagaagtt  | tactaagcag  |
| 23461 | aaaaaaagac  | aaagaatccc  | cgagttagct  | agtctttttac | tatctctgtc  | gagtattagc  |
| 23521 | attttttgat  | gtcttgtaac  | gcttttataag | cgcgttcagc  | ttatttagat  | aaaaatctag  |
| 23581 | atgtagatga  | agttttgtaa  | agacatacag  | tatctatata  | ctgcaaaaaa  | ttgaacataa  |
| 23641 | gacgccgata  | cattaagtaa  | tccttacctt  | ttaatctgca  | gattggcgaa  | agcaaataca  |
| 23701 | atagcttcac  | tatcatgata  | agtgggctgg  | cggagtttgt  | caaggaagtt  | tttttgtttc  |
| 23761 | tattcccaat  | aaaagtttgt  | tatatgggta  | tgcaagaagt  | ctaataaatc  | gcggcatgac  |
| 23821 | gtcttagcta  | tagatgctgg  | tctgtgtgat  | ttcaagagaa  | gcttagtaga  | taagttgtgt  |
| 23881 | tttaaaccag  | attcgggtatt | ttaaactgaa  | catttttcaat | aataccacct  | ggcataactg  |
| 23941 | aaattttttac | actcaggttt  | actttttagg  | agtccattaa  | ttcatcaact  | aatatgtcag  |
| 24001 | gagcgggaagc | acctgcagtg  | attcctatct  | tttctacgcc  | ctggaaccag  | cttttattta  |
| 24061 | cacatctgta  | attatcaatc  | aagtaggctc  | ttttttctct  | agcagtgcac  | agatctaata  |
| 24121 | agcgggtttga | atttgagcta  | tttttacttc  | ctacaactaa  | taccatgtct  | acaatttcag  |
| 24181 | ctagctttttt | aacagcattt  | tgtctgtttt  | gcgttgcata  | gcataatgtc  | tttaaatctg  |
| 24241 | gacctgttat  | gcttggaaac  | ctgagcttca  | gggcaacaat  | aattttcatgg | gtatcgtcga  |
| 24301 | tgcttaacgt  | ggtttgtgta  | acataagaca  | aattatctgg  | atctttaacc  | tttaaatcat  |
| 24361 | atacatcctg  | caaagtttgc  | actaaagtga  | taggattgtt  | tactcttccc  | ctaattccct  |

|       |             |             |             |             |             |             |
|-------|-------------|-------------|-------------|-------------|-------------|-------------|
| 24421 | taacttcttg  | atgggttttca | tgcccaatga  | gaattaattc  | tttaccactg  | ttttcatacc  |
| 24481 | tttttgcttc  | tttatgcact  | ttgctaacta  | aaggacatgt  | tgcacatcat  | acttgaatac  |
| 24541 | cctttctttt  | tgccctcatct | tctatatatt  | ttgatactcc  | gtgcgcgctg  | aagatcagta  |
| 24601 | ttccttcatt  | atccttcaatt | gcctcgatac  | tgcttacaaa  | aaccactcct  | tgtttcttaa  |
| 24661 | agtcctctac  | tatatattta  | ttgtgaacaa  | tttcgtgtag  | cacataaaact | tggcgctcgt  |
| 24721 | ttttatatatt | ttctaaagta  | atagctaata  | tgtccacagc  | tctttttacc  | ccggcacaaa  |
| 24781 | aacctcgtgg  | ttcagctaag  | atgattttcca | tttttgtcaa  | atcaagtaaa  | tatgcaagca  |
| 24841 | ttacttaaaa  | ataagctccg  | ctcactgtgt  | ttcatagtac  | cattattttat | attttatata  |
| 24901 | ataattatttt | ttcgcatatt  | ctctttaaca  | tttgatcaac  | ctactacttc  | agaaaatttt  |
| 24961 | agaaaagata  | atatagtaca  | taaacaacct  | gatatttttag | atagaaatgg  | agtggtaata  |
| 25021 | gcaacaaatg  | tgcccacaa   | atcactatat  | atagatgcaa  | ccaaagtaaa  | gaatccggac  |
| 25081 | agtatagcag  | cacaactgtg  | ttctactttg  | catgacctcg  | aatacaagaa  | cttatataga  |
| 25141 | gtacttactt  | cagaaaagaa  | atttgcttgg  | ataaagcggc  | acttgactcc  | aaaagaatta  |
| 25201 | ctagcgatca  | aaaacgctgg  | tgtaccagga  | gtaaatTTTT  | atgacgacat  | aaagcgtata  |
| 25261 | tatcctcaca  | gtaattttatt | ttcacacgtg  | cttggttaca  | ctgacataga  | tggcaatggg  |
| 25321 | attgcaggag  | ttgaggcgta  | tataagtaaa  | aacaaacaac  | attctgttat  | ccaagtacct  |
| 25381 | gatatacagt  | tgtatgaatg  | ttgcaacttg  | aaagcaattc  | ctgcacagca  | attccccaca  |
| 25441 | caacagatcc  | agtgcgtgac  | actgggatcc  | agatataaaa  | atactgacaa  | attacgtgat  |
| 25501 | gaacaacgga  | ttccagaaac  | atatgtcaaa  | aacaatgttt  | gtgatgaaat  | tgcgcataaa  |
| 25561 | actggattcc  | agtgtcagtg  | cactggaatg  | acaccagacc  | aagcttctgc  | acaatcttct  |
| 25621 | gtcatccgac  | agggatggtc  | acgctctgct  | gatcaatatg  | ttcaactatc  | cttagatata  |
| 25681 | cgagtgcaaa  | gcatagtgca  | tgaagagcta  | actaaagctg  | taagcagata  | tcaggcactt  |
| 25741 | ggcggagtag  | gaattgtttt  | aaatgtgaga  | aatagtgaag  | ttatctcgat  | ggtcagccta  |
| 25801 | cctgattttta | atcccaactt  | acagaataag  | gcagaagacg  | tacaaaagtt  | taatcgcgcc  |
| 25861 | agtcttgggg  | tatatgagat  | ggggtcggta  | ttaaaatact  | ttacaatagc  | cgcagcgctt  |
| 25921 | gatgcgaacg  | ctacaaaaac  | tagcgattta  | tatgacgtat  | caacaccaat  | caccattgga  |
| 25981 | aagtataaaa  | ttcaggattt  | tcataaatct  | aaaattccaa  | aaattactgt  | gcaagatata  |
| 26041 | tttgtaaaat  | catccaacat  | tggtgcagca  | aaaattgcag  | tcaaactagg  | tattgaaaaa  |
| 26101 | caggtagaat  | acttttaaagc | tatgaagcta  | ttttctcctt  | tgaaaataga  | aataccagaa  |
| 26161 | aaatccacac  | cgataatccc  | ggataaatgg  | agtgaaaaca  | ctttaataac  | agcatcttat  |
| 26221 | ggttatggca  | tagctgtaac  | tcctatacat  | cttgcacaaa  | ctgcagcagc  | attaatcaac  |
| 26281 | aatgggatata | ttcataacgc  | aaccttgatg  | ttgaataaaa  | gaagtatagg  | agagcaaatt  |
| 26341 | atctcaagaa  | gaacttccag  | ggaaatgaga  | aaattattac  | gtgcagcagt  | aacagatggc  |
| 26401 | actggcagaa  | aagcaaaaaat | aaaggcatat  | tcaataggag  | gaaaaactgg  | atcggcggaa  |
| 26461 | aaagttgtag  | atggtaaata  | tagcaaagat  | gcaaacatag  | catcattttat | aggagtgcata |
| 26521 | actatgcttg  | acccaaggta  | catagtgcata | attgctattg  | atgagcctca  | agggatgcac  |
| 26581 | cataccgggg  | gagtaattgc  | tgcgctcata  | gtaagaaaaca | ttataaatag  | agtagcacct  |
| 26641 | atactaaatg  | ttacacctga  | gatgtaaaaat | tataattgct  | ttactataat  | ttcaaattta  |
| 26701 | tcattaccaa  | aatcctttatt | aatataccaa  | gaaccatcat  | cttttagttac | aaattcaaga  |
| 26761 | cctttaagggt | cttttttttat | tgtctttcca  | ttttgaccat  | caatagcgat  | attaatatcg  |
| 26821 | aatgtaataa  | tgtctagatt  | tatcatagct  | tctttcccg   | tgacagcaat  | tagactgaac  |
| 26881 | ttgcctaaca  | tgacatcatt  | aaaactcact  | tcccctgtat  | agacatcaca  | ctgaccgtcc  |
| 26941 | acacaacacg  | tagtttcaat  | atagaaaaga  | tctgacatac  | aaaatacctt  | aaaaaaaaga  |
| 27001 | actaaacata  | tatggccact  | acaccacacc  | gctaacaagt  | agtaaaagcg  | cgataaacct  |
| 27061 | aagttacttt  | agctacgtag  | ccataatata  | gctagaaatg  | taaaattcaa  | cagtttaattg |
| 27121 | tgtgattaat  | agagaagtct  | tatttagtac  | accttatagg  | aatggctgtt  | tagttttttt  |
| 27181 | gttaatcttt  | tttaccatgc  | tgtcaatcat  | atgctttatc  | ccttgatata  | cagagtatgt  |
| 27241 | actttcgtcg  | ctacgcatac  | aagcagaaca  | ggaaaatata  | ttatgttctt  | cgtcttctat  |
| 27301 | tgataactct  | gtatcgcatc  | ttatgtgtct  | gccgccaaag  | ctttctatca  | actgttctct  |
| 27361 | gtcatctcct  | atagttacct  | taaccttact  | ttcttcttta  | cctatcttgc  | tacttaaaat  |
| 27421 | tgaacaatg   | atggctggag  | atatgcatac  | cgctcctatt  | ggcttttttg  | taacaaaaaa  |
| 27481 | ttctgaaact  | aatctttcaa  | attcaggcat  | tactgtcacc  | atgtctttac  | tttcagctaa  |
| 27541 | gtcagataaa  | tttttcgcaa  | ccccgtatcc  | accaggtaca  | actagcatgt  | caaaattttc  |
| 27601 | agctttggct  | tcttttaagt  | catatatatt  | gcctcttgctg | attcttgcgtg | cttctacaag  |
| 27661 | tacattcctt  | ttttcttttg  | ttgcctcttt  | tgttctatga  | ttcataaact  | gtgtgatatt  |
| 27721 | gatatcagggt | gcaaagcatt  | taacatccac  | ttcctgctga  | tcaagaacaa  | gcaaacttaa  |
| 27781 | aaccgcttct  | cttacctctg  | caccgtcaag  | gtgaccacac  | cctgataaga  | ccacagcagc  |
| 27841 | ttttaatttt  | ttttcaccca  | taaagtacct  | tgattttcata | taatctagat  | attttaatac  |
| 27901 | aaattctata  | tttggaagg   | ggtatgttat  | atcaattata  | atataattaa  | tgattagtat  |
| 27961 | gtataattag  | gcataatttat | aatcaacaaa  | gctgaatatg  | gaatctagca  | atagtatgtt  |

```

28021 ttttgacact
//
LOCUS      JAQZAU010000048      22476 bp      dna      linear      ENV 17-MAR-2023
DEFINITION MAG: Wolbachia pipientis isolate wEsol contig_32781, whole genome
            shotgun sequence.
ACCESSION  JAQZAU010000048  JAQZAU010000000
VERSION    JAQZAU010000048.1
DBLINK     BioProject: PRJNA929258
            BioSample: SAMN33142973
KEYWORDS   WGS; ENV; Metagenome Assembled Genome; MAG.
SOURCE     Wolbachia pipientis (insect metagenome)
ORGANISM   Wolbachia pipientis
            Bacteria; Pseudomonadota; Alphaproteobacteria; Rickettsiales;
            Anaplasmataceae; Wolbachieae; Wolbachia.
REFERENCE  1  (bases 1 to 22476)
AUTHORS    Fiutek,N., Couger,B.M., Roy,S., de la Torre,J.R. and Connor,E.F.
TITLE      Genomic assessment of the contribution of the Wolbachia
            endosymbiont of Eurosta solidaginis to gall-induction
JOURNAL    International Journal Molecular Sciences
REFERENCE  2  (bases 1 to 22476)
AUTHORS    Fiutek,N., Couger,B.M., Roy,S., de la Torre,J.R. and Connor,E.F.
TITLE      Direct Submission
JOURNAL    Submitted (10-FEB-2023) Biology, San Francisco State University,
            1600 Holloway Ave, San Francisco, CA 94132, USA
COMMENT    ##Genome-Assembly-Data-START##
            Assembly Date      :: JUN-2019
            Assembly Method    :: FLYE v. 06-2019
            Genome Representation :: Full
            Expected Final Version :: Yes
            Genome Coverage    :: 100.0x
            Sequencing Technology :: Illumina HiSeq; PacBio Sequel
            ##Genome-Assembly-Data-END##
FEATURES   Location/Qualifiers
            source              1..22476
                                /organism="Wolbachia pipientis"
                                /mol_type="genomic DNA"
                                /submitter_seqid="contig_32781"
                                /isolate="wEsol"
                                /isolation_source="galls on Solidago altissima"
                                /host="Eurosta solidaginis MN-2018-EFC"
                                /db_xref="taxon:955"
                                /environmental_sample
                                /country="USA: Cowling Arboretum, Carleton College,
                                Northfield, MN"
                                /lat_lon="44.48 N 93.13 W"
                                /altitude="280 m"
                                /collection_date="2018-11"
                                /metagenome_source="insect metagenome"
                                /note="metagenomic"
            gene                complement(<1..113)
                                /locus_tag="wEsol_00420"
            CDS                  complement(<1..113)
                                /locus_tag="wEsol_00420"
                                /codon_start=1
                                /transl_table=11
                                /product="hypothetical protein"
                                /translation="MSFQCLTLESSFPYNLIENVVTTTFYASLLVNKQTFLD"
            gene                278..613
                                /locus_tag="wEsol_00421"
            CDS                  278..613

```

```

/locus_tag="wEsol_00421"
/codon_start=1
/transl_table=11
/fullproduct="qcoverage 100 , hcoverage 100 , similarity
100 , identity 100 , evalue 1.62e-71 , alnlength 111 ,
Bacteria , Proteobacteria , WP_015589221.1 MULTISPECIES:
divalent-cation tolerance protein CutA [unclassified
Wolbachia]"
/cog="CutA COG1324 104 Uncharacterized protein involved
in tolerance to divalent cations"
/pfam="CutA1"
/product="divalent-cation
tolerance protein CutA"
/translation="MSSLVLIYTTFSNFEEAKTISEELLNEKLIVCVNIFPEVNSLYL
WEGKISNSCEVVAIMKSKNDQVDKIVEKIEAMHSYDQPAIAVMPIEKANKSFTNWANS
VIDVSSIGV"
/besthit="qcoverage 100 , hcoverage 100 , similarity 100
, identity 100 , evalue 1.62e-71 , alnlength 111 ,
Bacteria , Proteobacteria , WP_015589221.1 MULTISPECIES:
divalent-cation tolerance protein CutA [unclassified
Wolbachia]"
gene 697..1272
/locus_tag="wEsol_00422"
CDS 697..1272
/locus_tag="wEsol_00422"
/codon_start=1
/transl_table=11
/fullproduct="qcoverage 100 , hcoverage 100 , similarity
100 , identity 100 , evalue 5.16e-127 , alnlength 191 ,
Bacteria , Proteobacteria , WP_010962863.1 MULTISPECIES:
hypothetical protein [Wolbachia]"
/translation="MISLFYKLRLNLYILGSLKDIIVKLFLFTMYLYTFSIVLMFLSN
GFWYAVEFCFSKNAFYRLFQYCKWYYENREDLGYGISIRILVAFLTPHFLYKLLLGTG
WKSFLKEKIIQILNTRRKKGSEFSNSSKPSGSSYSKNNYSNNSGNNERQAQDAKRKV
NMIKQLLIKDIEATIDRRLNYIFFGKRSPH"
/product="hypothetical protein"
/besthit="qcoverage 100 , hcoverage 100 , similarity 100
, identity 100 , evalue 5.16e-127 , alnlength 191 ,
Bacteria , Proteobacteria , WP_010962863.1 MULTISPECIES:
hypothetical protein [Wolbachia]"
gene complement(1288..1575)
/locus_tag="wEsol_00423"
CDS complement(1288..1575)
/locus_tag="wEsol_00423"
/codon_start=1
/transl_table=11
/fullproduct="qcoverage 100 , hcoverage 100 , similarity
100 , identity 100 , evalue 1.01e-62 , alnlength 95 ,
Bacteria , Proteobacteria , WP_007549783.1 MULTISPECIES:
hypothetical protein [Wolbachia]"
/translation="MSNNFNFKEFFNHYETNSTSDDIQRYLLWKS VIAQAMIDAASH
CKKTESLVEKRKAISWLSDFSQDFVHTCILADCDPVYVKNKIQPTLKS LTR"
/product="hypothetical protein"
/besthit="qcoverage 100 , hcoverage 100 , similarity 100
, identity 100 , evalue 1.01e-62 , alnlength 95 ,
Bacteria , Proteobacteria , WP_007549783.1 MULTISPECIES:
hypothetical protein [Wolbachia]"
gene complement(2165..4186)
/locus_tag="wEsol_00424"
CDS complement(2165..4186)

```

```

/locus_tag="wEsol_00424"
/codon_start=1
/transl_table=11
/fullproduct="qcoverage 100 , hcoverage 100 , similarity
100 , identity 100 , evaluate 0.0 , alnlength 673 ,
Bacteria , Proteobacteria , WP_015589220.1 MULTISPECIES:
ATP-dependent DNA helicase RecG [unclassified Wolbachia]"
/cog="RecG COG1200 677 RecG-like helicase"
/pfam="Pfam-B_17158 ResIII DEAD SNF2_N SecA_DEAD
Helicase_C Helicase_C Pfam-B_5382"
/tigr="TIGR00643 recG 629 ATP-dependent DNA helicase
RecG"
/product="ATP-dependent DNA
helicase RecG"
/translation="MSNQIFLNSRLENIPKFHSAILPKLCGGDKVVDLLFYKPLSYVD
RSKLLSDARVGEFTTTFIAKVYEHQSPTFRGRPYKIVVESESQYIFIVFFNYSVKYLYK
LFPIGANVIISGKLEKFAEHWQITHPDYVSLDINQFKKIACIEPVYQLCRGITNKRIG
NIISSNLKELPDLPEWIDDTLIKQKKWLSWRESIIKLHRPSSLVEAEVCRKRLAYDEL
FAYQLALKLARKNHVKERGREFIILSKYKEQVLNELSFQLTNDQTRAIDEISERQKSK
YRMISLLQGDVGSGKTVVALFAMINVVENNMQAALMAPTTILAEQHYNWIEEVLSCD
IKVALLTGKTSRKERKIIMNELASGVLNIVIGTHALFQANVTFTKNLGLAVIDEQQRF
VMQRNRLVGKGENADILFVTATPIPRTLQQAMYGDVECSILKEKPKSRLPIKTVTMNI
SRVPDVIEKLKGAINRGEKAYWICPYIEENEETNIAAAEMRFQELQKTFLDKVGIIHG
KLTQEQQKDQVMFSFKRNEFSLLVATTVIEVGIDVPDATIMIENAEQFGLSQLHQLRG
RVGRGNKPSFCVLLYDNLSSSSSKLKIMCESQDGFYIAERDMMLRGSGDILGKQSG
CMEFKFADLYQDKELNLAYNNAKGAMADFELLLDIFEYRSRLHFSKFQ"
/besthit="qcoverage 100 , hcoverage 100 , similarity 100
, identity 100 , evaluate 0.0 , alnlength 673 , Bacteria ,
Proteobacteria , WP_015589220.1 MULTISPECIES:
ATP-dependent DNA helicase RecG [unclassified Wolbachia]"
gene complement(4236..4397)
/locus_tag="wEsol_00425"
CDS complement(4236..4397)
/locus_tag="wEsol_00425"
/codon_start=1
/transl_table=11
/fullproduct="qcoverage 100 , hcoverage 100 , similarity
98.1 , identity 98.1 , evaluate 1.12e-27 , alnlength 53 ,
Bacteria , Proteobacteria , WP_208974573.1 hypothetical
protein [Wolbachia pipientis]"
/translation="MIANIVRGNLGLPMILKTTNSSFRYVLAAEIPRMNRGITLES
SYSAYLTIR"
/product="hypothetical protein"
/besthit="qcoverage 100 , hcoverage 100 , similarity 98.1
, identity 98.1 , evaluate 1.12e-27 , alnlength 53 ,
Bacteria , Proteobacteria , WP_208974573.1 hypothetical
protein [Wolbachia pipientis]"
gene 4483..5313
/locus_tag="wEsol_00426"
CDS 4483..5313
/locus_tag="wEsol_00426"
/codon_start=1
/transl_table=11
/fullproduct="qcoverage 100 , hcoverage 100 , similarity
99.6 , identity 99.6 , evaluate 1.07e-193 , alnlength 276 ,
Bacteria , Proteobacteria , WP_015589219.1 MULTISPECIES:
hypothetical protein [unclassified Wolbachia]"
/translation="MSSSISEEKENPVVTLRAQAEKFGFSKLKLAGKDNAEANS
GNTAF
LDFQRMDFVINGKSIISDLIAELYKEHDSLLPKSEGKNEDYRPFARKVFKEMFKYAKA
EVPSDSILEELVINCNQAGYEAGVHIEFQGALSQHSFIIERPEKVISIDCVSQNNVSV

```

```

KSDMTLPIFFQRS DGTFGDKVYDLSSSLEFTLKSQDDKNVTTYTNGNLSLTVPERLKDY
NIGDKSLFDIIKEYFQKLCERLGFFKIKIEHGLGDPLEVSDHLENMEPPIRSNEHGLN
"
/product="hypothetical protein"
/besthit="qcoverage 100 , hcoverage 100 , similarity 99.6
, identity 99.6 , evalue 1.07e-193 , alnlength 276 ,
Bacteria , Proteobacteria , WP_015589219.1 MULTISPECIES:
hypothetical protein [unclassified Wolbachia]"
gene complement(5310..6194)
/locus_tag="wEsol_00427"
CDS complement(5310..6194)
/locus_tag="wEsol_00427"
/codon_start=1
/transl_table=11
/fullproduct="qcoverage 100 , hcoverage 100 , similarity
99.7 , identity 99.7 , evalue 1.48e-209 , alnlength 294 ,
Bacteria , Proteobacteria , WP_006280293.1 MULTISPECIES:
tRNA (adenosine(37)-N6)-dimethylallyltransferase MiaA
[Wolbachia]"
/cog="MiaA COG0324 308 tRNA
delta(2)-isopentenylpyrophosphate transferase"
/pfam="AAA_14 AAA_17 AAA_18 IPPT"
/tigr="TIGR00174 miaA 288 tRNA dimethylallyltransferase"
/product="tRNA
(adenosine(37)-N6)-dimethylallyltransferase MiaA"
/translation="MKNNIVIITGITASGKSELCDNLIEKYGNISIIINCDKQVYEEI
PIITAQPPKQEVFYKLYGYVSAKENYSVGLWLEDLEKEVNHALENAQIPIITGGSGLY
ISSLIKGLSSMPQISQKVRKNVSELRKNSKEEFYKLALSKDPRIQGVFMNDSHRLS
RALEVITETGKSIFVWQENRQPPLFNNFKIYITILPKREDVYRKINSRIFITMIENGAID
EVKKLLSMNLAPHL PAMKAHGVPEIIKYLKGEITLDEVIQIAQTNTRHYAKRQYTWFK
KQFLNAEVIDCANKLKIF"
/besthit="qcoverage 100 , hcoverage 100 , similarity 99.7
, identity 99.7 , evalue 1.48e-209 , alnlength 294 ,
Bacteria , Proteobacteria , WP_006280293.1 MULTISPECIES:
tRNA (adenosine(37)-N6)-dimethylallyltransferase MiaA
[Wolbachia]"
gene 6270..6740
/locus_tag="wEsol_00428"
CDS 6270..6740
/locus_tag="wEsol_00428"
/codon_start=1
/transl_table=11
/fullproduct="qcoverage 100 , hcoverage 100 , similarity
100 , identity 100 , evalue 6.14e-102 , alnlength 156 ,
Bacteria , Proteobacteria , WP_015589217.1 MULTISPECIES:
hypothetical protein [unclassified Wolbachia]"
/translation="MAENNDNNSFTKRFTNRTPGGTGEGFSSKYSSQNTKERALGEKG
KISELAGKKTESKEAFSESGGIKSKSRTVNERSFADATKRSRSDLVYLVRGKDRGKSA
WHYVLVDKEKREMFLAKSRTGSIDVADYGEILYSGWGEDPPQAIIDKVNEEFGL"
/product="hypothetical protein"
/besthit="qcoverage 100 , hcoverage 100 , similarity 100
, identity 100 , evalue 6.14e-102 , alnlength 156 ,
Bacteria , Proteobacteria , WP_015589217.1 MULTISPECIES:
hypothetical protein [unclassified Wolbachia]"
gene 6859..7446
/locus_tag="wEsol_00429"
CDS 6859..7446
/locus_tag="wEsol_00429"
/codon_start=1
/transl_table=11

```

```

/fullproduct="qcoverage 100 , hcoverage 100 , similarity
100 , identity 100 , evaluate 1.31e-131 , alnlength 195 ,
Bacteria , Proteobacteria , WP_141457207.1 MULTISPECIES:
threonylcarbamoyl-AMP synthase [unclassified Wolbachia]"
/cog="SUA5 COG0009 211 Putative translation factor
(SUA5)"
/pfam="Sua5_yciO_yrdC"
/tigr="TIGR00057 TIGR00057 202 Sua5/YciO/YrdC/YwlC family
protein"
/product="
threonylcarbamoyl-AMP synthase"
/translation="MVSKIINAIQNNLLVCFPTETVYALACNALDNESIGKIYQIKKR
SQNKPLSIFVSDIYNLTAKVKERYIDLINHFSPGPITYILPLKNNNILPNEFFKDS
IGIRIPEHPAIAISILNKLKVPVATSINISGEKSVCKADDIPQSIKQHLSAVIEDDEL
VSGIESTIIDLTEDKIKVLREGAILLQTVNNAFSN"
/besthit="qcoverage 100 , hcoverage 100 , similarity 100
, identity 100 , evaluate 1.31e-131 , alnlength 195 ,
Bacteria , Proteobacteria , WP_141457207.1 MULTISPECIES:
threonylcarbamoyl-AMP synthase [unclassified Wolbachia]"
gene 7464..8285
/locus_tag="wEsol_00430"
CDS 7464..8285
/locus_tag="wEsol_00430"
/codon_start=1
/transl_table=11
/pfam="DNA_pol3_delta2 AAA_24 AAA_14 AAA"
/fullproduct="qcoverage 100 , hcoverage 100 , similarity
100 , identity 100 , evaluate 4.02e-192 , alnlength 273 ,
Bacteria , Proteobacteria , WP_141457205.1 MULTISPECIES:
DNA polymerase III subunit delta' [unclassified
Wolbachia]"
/translation="MKKVIGHNQAKKKLMNNLSVQSWLICGKKGIGKATLAKSFSNWL
LIKSYNEVALDLHIVEGDTIGIEKVREMKNFLHLSPIQSEHKIAIIDSLEAMTNNAKN
AILKILEEPPKNSKIFIISHKPYDIQTTLRCRCFQLNLLPLTYDETKQVVSQCKFDD
QIFDEIITLFPGMPGMIINAISSDAYEAYKCFYKFLHDLKNPNMINKVINSEIELELA
SYIIQAFILESIREVNDVEILLSQWKKIDELFVVAQLHLDKKHVLANVVNIMT"
/product="DNA polymerase III
subunit delta'"
/besthit="qcoverage 100 , hcoverage 100 , similarity 100
, identity 100 , evaluate 4.02e-192 , alnlength 273 ,
Bacteria , Proteobacteria , WP_141457205.1 MULTISPECIES:
DNA polymerase III subunit delta' [unclassified
Wolbachia]"
gene 8359..9153
/locus_tag="wEsol_00431"
CDS 8359..9153
/locus_tag="wEsol_00431"
/codon_start=1
/transl_table=11
/fullproduct="qcoverage 100 , hcoverage 100 , similarity
100 , identity 100 , evaluate 4.20e-194 , alnlength 264 ,
Bacteria , Proteobacteria , WP_015589214.1 MULTISPECIES:
hypothetical protein [unclassified Wolbachia]"
/translation="MTDNKLTWVQSIEVLTKAILNMQKELSSIKNIALDQDVTLEKKG
ELLSGIYEANFKLNKAINIATLPKIGYHMLNGEFVVRNHITEEVRIPRDFHYLKVVK
SDHDNYKLTFCNFLGNEFFEYKKYDPQYSGVSDEYKFVDFGVSVKKTHNLKFKEYVGHA
PKFFAAEGPIEPGSQNHVIDLFELVKSGKGRKVGTFADDFGYFDDQNKLHYNYHKS
ESNTYDPENFSVKMINIDVSKIDKFYLIAEQGDIIHPIWENLDIF"
/product="hypothetical protein"
/besthit="qcoverage 100 , hcoverage 100 , similarity 100

```

```

, identity 100 , evalue 4.20e-194 , alnlength 264 ,
Bacteria , Proteobacteria , WP_015589214.1 MULTISPECIES:
hypothetical protein [unclassified Wolbachia]"
gene 9222..9875
/locus_tag="wEsol_00432"
CDS 9222..9875
/locus_tag="wEsol_00432"
/codon_start=1
/transl_table=11
/fullproduct="qcoverage 100 , hcoverage 100 , similarity
100 , identity 100 , evalue 2.81e-146 , alnlength 217 ,
Bacteria , Proteobacteria , WP_015589213.1 MULTISPECIES:
type IV secretion system protein VirB8 [unclassified
Wolbachia]"
/cog="VirB8 COG3736 239 Type IV secretory pathway,
component VirB8"
/pfam="VirB8"
/product="type IV secretion
system protein VirB8"
/translation="MEDKLLSVKNKSYFSKAVEWYCHRYLFCVAERSWMALIVSLLL
VCLCLLTNIYLLFPVKDLNFKVMNHTDEFSAMHKLSFSKKEDEYTSTARYLISK
YIEVYESIKTVEPKYQENFIRNNSIHKIHQGFQEKTNNEAVSSKRKITNINVITLSID
RSTKDLVTFAGNATVVFTTEQNKEDTVEISFTLSNIKATLAGIIPFKFIVNGYKYRF"
/besthit="qcoverage 100 , hcoverage 100 , similarity 100
, identity 100 , evalue 2.81e-146 , alnlength 217 ,
Bacteria , Proteobacteria , WP_015589213.1 MULTISPECIES:
type IV secretion system protein VirB8 [unclassified
Wolbachia]"
gene complement(9872..11353)
/locus_tag="wEsol_00433"
CDS complement(9872..11353)
/locus_tag="wEsol_00433"
/codon_start=1
/transl_table=11
/fullproduct="qcoverage 100 , hcoverage 100 , similarity
100 , identity 100 , evalue 0.0 , alnlength 493 ,
Bacteria , Proteobacteria , AGK00129.1 Putative
NADH-ubiquinone oxidoreductase subunit [Wolbachia
endosymbiont of Drosophila simulans wHa]"
/cog="HyfB COG0651 504 Formate hydrogenlyase subunit
3/Multisubunit Na+/H+ antiporter, MnhD subunit"
/pfam="Oxidored_q1"
/tigr="TIGR01974 NDH_I_L 630 proton-translocating
NADH-quinone oxidoreductase, chain L"
/product="Putative NADH-ubiquinone
oxidoreductase subunit"
/translation="MYLSLPFSITENYLLITALIPLLSALVIFFTGKWPGVNNSITVT
SSVLLFTYTCLCTLYWVYGDHSQFILMDFGNNLHISLKLESTGVIFSLISFLWVLTS
IYAICYMQNNYADSNHSSFLCFFSISISCAMFIAFSGDLLTTFVVFYELLTISTYPLVT
YNSTNESMIAGRYYFGVLFFSSLVLFPPAIGLLYNEFHTLDFVSGGIFKFDTSITFI
AVCFAMLIYGIGKAALMPMHFWLPKAMVAPTPVSALLHAVAVVKSQGVFIIKVVILYTF
GIGNMQRFAQQSWFAGGWLPYAAGFTIITASLIALKQKELKKLLAYSTISQLSYIILF
ASIFSELSMRVAIFQLVCHAFAKITLFFVAGAIITRAGEKYIDKIYGIGRSMPISMTA
FAIGALSMIGVPPAPTFWGKFLIFQAVFNSGNVILSVFVTLVLIVSTILNALYFLPII
YNAFFLKPSQNYFIKKTPIILLVLPVITATCTLVIFFSYQVIF"
/besthit="qcoverage 100 , hcoverage 100 , similarity 100
, identity 100 , evalue 0.0 , alnlength 493 , Bacteria ,
Proteobacteria , AGK00129.1 Putative NADH-ubiquinone
oxidoreductase subunit [Wolbachia endosymbiont of
Drosophila simulans wHa]"

```

```

gene      complement(11729..12085)
          /locus_tag="wEsol_00434"
CDS       complement(11729..12085)
          /locus_tag="wEsol_00434"
          /codon_start=1
          /transl_table=11
          /fullproduct="qcoverage 100 , hcoverage 100 , similarity
100 , identity 100 , evalue 8.73e-77 , alnlength 118 ,
Bacteria , Proteobacteria , WP_007549151.1 MULTISPECIES:
holo-[acyl-carrier-protein] synthase [Wolbachia]"
          /cog="AcpS COG0736 127 Phosphopantetheinyl transferase
(holo-ACP synthase)"
          /pfam="ACPS"
          /tigr="TIGR00516 acpS 125 holo-[acyl-carrier-protein]
synthase"
          /product="holo-"
          /translation="MIHGIGTDIVYIPRVSRILQKYGEKFLNRIYTEKEIELSRKYN
S
QEMRRARYFAKRFAAKEAFVKARGSGQGIIMKDIEIYNDVRGKPYLTVSKDFISKIHL
LSDDGDYATAFVVICV"
          /besthit="qcoverage 100 , hcoverage 100 , similarity 100
, identity 100 , evalue 8.73e-77 , alnlength 118 ,
Bacteria , Proteobacteria , WP_007549151.1 MULTISPECIES:
holo-[acyl-carrier-protein] synthase [Wolbachia]"
gene      complement(12082..13350)
          /locus_tag="wEsol_00435"
CDS       complement(12082..13350)
          /locus_tag="wEsol_00435"
          /codon_start=1
          /transl_table=11
          /pfam="tRNA-synt_2b HGTP_anticodon"
          /fullproduct="qcoverage 100 , hcoverage 100 , similarity
100 , identity 100 , evalue 2.48e-309 , alnlength 422 ,
Bacteria , Proteobacteria , WP_015589211.1 MULTISPECIES:
proline--tRNA ligase [unclassified Wolbachia]"
          /translation="MRLSKYYLPTLKEKPAHAKIISHQYSLRAGLIKQIASGIYSWLP
LGLLVLKNIEDIIRDEMKNKSGAIEVLMPVCQPANLWRESGRYDDYGKEMLRIRDRHEE
DMLFGPTHEEVATDLIRDVMKSYKDLPLCLYQIQWKFRDEVPRPYGVMRGREFLMKDA
YSFDVDYEGALNSYNLMYKTYIKIFKRMGLTPIGVRADTGPIGGNLSHEFHILANTGE
STLYYDNKFSELLESEDVESLKSIYAVADDMDHPETCPISQEQLNVSKGIEIGHIFYF
GDKYSKPMKASVTSQDGKNVNIHMGSYGIGVSRVLGAIIEAFHDDKGIIWPEVAPFR
IGLINLQTKVTEAADKIYKALKSDEVLYDDTEGSVGVKFSRMDLIGLPWQIIVGKKAI
DEKIVEVKNRATGEVKEMQIEEAINHFSTK"
          /product="proline--tRNA
ligase"
          /besthit="qcoverage 100 , hcoverage 100 , similarity 100
, identity 100 , evalue 2.48e-309 , alnlength 422 ,
Bacteria , Proteobacteria , WP_015589211.1 MULTISPECIES:
proline--tRNA ligase [unclassified Wolbachia]"
gene      complement(13666..15009)
          /locus_tag="wEsol_00436"
CDS       complement(13666..15009)
          /locus_tag="wEsol_00436"
          /codon_start=1
          /transl_table=11
          /pfam="DDE_Tnp_1"
          /fullproduct="qcoverage 100 , hcoverage 100 , similarity
99.8 , identity 99.8 , evalue 0.0 , alnlength 447 ,
Bacteria , Proteobacteria , AGJ99681.1 Transposase, IS4
family [Wolbachia endosymbiont of Drosophila simulans
wHa]"

```

```

/translation="MRELTMDRIACLSKDLNEFFNEKADEISIAVGFIKRKRKLNSS
FIKAMVFGNIGVDDCSIETMCQLLNEDSIEITKQGLDFRFSEEAVEFMKKMYNEALCL
FKKSLQIDCKILQQFGSVKLLDSSYISLPISMEDMYKGYGSSYRDCENNTKSGIKLQL
VFDYLNQALDKLNFMEGIRSDQGYRDYLNGLSANDLLIFDLGYFVPSSFQKIDEAGAY
FVSRYSKSDTNIYDIETNQKIELLEYLEGQLSSEKEVLLGKEVKIKVRIICQKLTEEQS
MARRRKANKLAKSHGYTSSQKNQKLLDWSIFITNVPESKINAEQILTVYRVRWQIELL
FKLYKSHINLDKLGKTNPFVRLCELYAKLCAILVFHGMIGCVKLLKKNTELSLTKAFI
ELKRRVRELFILNINNNLKIIFLKKLTIIWSKFSLKDRYRKTRVSTLSSLHSLT"
/product="Transposase, IS4 family"
/besthit="qcoverage 100 , hcoverage 100 , similarity 99.8
, identity 99.8 , evaluate 0.0 , alnlength 447 , Bacteria ,
Proteobacteria , AGJ99681.1 Transposase, IS4 family
[Wolbachia endosymbiont of Drosophila simulans wHa]"
gene complement(15028..16155)
/locus_tag="wEsol_00437"
CDS complement(15028..16155)
/locus_tag="wEsol_00437"
/codon_start=1
/transl_table=11
/fullproduct="qcoverage 95.4666666666667 , hcoverage
86.8932038834951 , similarity 100 , identity 100 , evaluate
3.94e-257 , alnlength 358 , Bacteria , Proteobacteria ,
WP_174517027.1 IS256 family transposase [Wolbachia
endosymbiont of Cardiocondyla obscurior]"
/cog="COG3328 COG3328 379 Transposase and inactivated
derivatives"
/pfam="Transposase_mut MULE DDE_Tnp_ISL3"
/product="IS256 family transposase"
/translation="MSQKVVRNTTGLVDYKELETNILSSIREGRPLTGRDGALTPFIK
RLLEASLEGEIENHLLAESEENNRNRNNAKTLRTSAGSFELLTPRDREGSFEPQIVK
KRQTNLHPELETKILSTFASGMGYRDIASHVEEIIYDHKISAAEISSITDKLLPVINEW
RSRPLQSVYPIVFMDDGMFFKVKEDGHCVSKCMYNILGIDQNGRKEVLGFYLAESEGAN
FWLGVLNDLKERGVEDILIAVDGLKSFPNTAINSVPNAEVQLCVVHQIRNSLYKYVSS
KDVKIFMSDLKKVYQASSREIAENYLLLEEKWGEKYPLVVKSWQNNWENLSGYFKYS
GPVRRLIYTTNPIEGLHRQIRKFTLRKSVSKVDRVKENNKV"
/besthit="qcoverage 95.4666666666667 , hcoverage
86.8932038834951 , similarity 100 , identity 100 , evaluate
3.94e-257 , alnlength 358 , Bacteria , Proteobacteria ,
WP_174517027.1 IS256 family transposase [Wolbachia
endosymbiont of Cardiocondyla obscurior]"
gene 16307..17650
/locus_tag="wEsol_00438"
CDS 16307..17650
/locus_tag="wEsol_00438"
/codon_start=1
/transl_table=11
/pfam="DDE_Tnp_1"
/fullproduct="qcoverage 100 , hcoverage 100 , similarity
99.8 , identity 99.8 , evaluate 0.0 , alnlength 447 ,
Bacteria , Proteobacteria , AGJ99681.1 Transposase, IS4
family [Wolbachia endosymbiont of Drosophila simulans
wHa]"
/translation="MRELTMDRIACLSKDLNEFFNEKADEISIAVGFIKRKRKLNSS
FIKAMVFGNIGVDDCSIETMCQLLNEDSIEITKQGLDFRFSEEAVEFMKKMYNEALCL
FKKSLQIDCKILQQFGSVKLLDSSYISLPISMEDMYKGYGSSYRDCENNTKSGIKLQL
VFDYLNQALDKLNFMEGIRSDQGYRDYLNGLSANDLLIFDLGYFVPSSFQKIDEAGAY
FVSRYSKSDTNIYDIETNQKIELLEYLEGQLSSEKEVLLGKEVKIKVRIICQKLTEEQS
MARRRKANKLAKSHGYTSSQKNQKLLDWSIFITNVPESKINAEQILTVYRVRWQIELL
FKLYKSHINLDKLGKTNPFVRLCELYAKLCAILVFHGMIGCVKLLKKNTELSLTKAFI
ELKRRVRELFILNINNNLKIIFLKKLTIIWSKFSLKDRYRKTRVSTLSSLHSLT"

```

```

        /product="Transposase, IS4 family"
        /besthit="qcoverage 100 , hcoverage 100 , similarity 99.8
        , identity 99.8 , evalue 0.0 , alnlength 447 , Bacteria ,
        Proteobacteria , AGJ99681.1 Transposase, IS4 family
        [Wolbachia endosymbiont of Drosophila simulans wHa]"
gene      complement(17642..18667)
        /locus_tag="wEsol_00439"
CDS       complement(17642..18667)
        /locus_tag="wEsol_00439"
        /codon_start=1
        /transl_table=11
        /product="hypothetical protein"
        /pfam="CAP_N Pfam-B_11521"
        /translation="MSTSNLKISIAALSLCVSAVAIYIHLPHYVIAAVSGSGAIAAVPL
        AIFAVSVVVALASVAYLIKLA VSRDDNKKEAGLNGQEFGHTASQEPQKSACKKNCNNLD
        SELIRKGLSVKQDSGSQTEVRSSEHVPNLTPQQPPLTLGTAIPQNNNAPPPPPPPSS
        NGTSSSKNASSPSDPDVKPDMSAVFNKITQQKPNLMSKEERDKKLKEQAAKSSNKGG
        GQQEKNEIDLADLSKALQKRRAGVNGKQGSQVQQPSHLGRAFSKVLAMIPPPSRSSS
        VSSDSSNVSDDENWETDPEPIEQASSGSQSLHRERSGSLDSGIGSGSEPTSPSHSGVL
        NKPYPASS"
        /besthit="qcoverage 26.3929618768328 , hcoverage 100 ,
        similarity 100 , identity 100 , evalue 1.74e-43 ,
        alnlength 90 , Bacteria , Proteobacteria , WP_051062215.1
        hypothetical protein [Wolbachia endosymbiont of
        Drosophila simulans]"
gene      19378..19758
        /locus_tag="wEsol_00440"
CDS       19378..19758
        /locus_tag="wEsol_00440"
        /codon_start=1
        /transl_table=11
        /pfam="RE_AlwI"
        /fullproduct="qcoverage 100 , hcoverage 100 , similarity
        100 , identity 100 , evalue 8.47e-81 , alnlength 126 ,
        Bacteria , Proteobacteria , WP_010082467.1 hypothetical
        protein [Wolbachia pipientis]"
        /translation="MRKRKLSFIDIFILILRKSVKSLQVILNEFILYRK KDYTVTASA
        FSQARKMKHSAFSEINEGVVSLYYQDQKFCTCFGRVLALDASKIILPTSVEIKNEF
        GSRKIRNQKPKDLGDYASATFAVC"
        /product="hypothetical protein"
        /besthit="qcoverage 100 , hcoverage 100 , similarity 100
        , identity 100 , evalue 8.47e-81 , alnlength 126 ,
        Bacteria , Proteobacteria , WP_010082467.1 hypothetical
        protein [Wolbachia pipientis]"
gene      20058..20561
        /locus_tag="wEsol_00441"
CDS       20058..20561
        /locus_tag="wEsol_00441"
        /codon_start=1
        /transl_table=11
        /pfam="DDE_Tnp_1_6 DDE_Tnp_1"
        /fullproduct="qcoverage 100 , hcoverage 100 , similarity
        100 , identity 100 , evalue 2.98e-112 , alnlength 167 ,
        Bacteria , Proteobacteria , WP_007549143.1 transposase
        [Wolbachia pipientis]"
        /translation="MVLPSGEIEVLATSLMDEQKFQTGGFKELYFLRWGVETFFAKLK
        GRLSLENFTGKSVE SVKQDFWSAIFISNLESVMTE DVEEALNMDLTD DKLKRSINKSV
        SFNAIKNLAFDIFATESD TDCIMDQLSKLFLMNTLAVRKGRKVDRHKVPYLR SFNYQK
        RVRKHIF"
        /product="transposase"

```

```

        /besthit="qcoverage 100 , hcoverage 100 , similarity 100
        , identity 100 , evalue 2.98e-112 , alnlength 167 ,
        Bacteria , Proteobacteria , WP_007549143.1 transposase
        [Wolbachia pipientis]"
gene      21002..21529
        /locus_tag="wEsol_00442"
CDS       21002..21529
        /locus_tag="wEsol_00442"
        /codon_start=1
        /transl_table=11
        /fullproduct="qcoverage 100 , hcoverage 100 , similarity
        100 , identity 100 , evalue 7.51e-119 , alnlength 175 ,
        Bacteria , Proteobacteria , WP_015589210.1 MULTISPECIES:
        cytochrome c family protein [unclassified Wolbachia]"
        /cog="COG3474 COG3474 135 Cytochrome c2"
        /pfam="Pfam-B_5051 Cytochrom_C Cytochrome_CBB3"
        /product="cytochrome c
        family protein"
        /translation="MELNKIAASILLSGLIIMIVSNVVDMLYSPEEYKIEHQTIVAAG
        SNEFQQKIEQVALDIGALMQNASFEKGKSAAKKCIACHSFEKGGMNKVGPNLWNIVGN
        KKAHLGNSFNYSKAVLDRGGKWGYEELFAFLKNPKAYIKGTRMAFAGISNPQEIADLV
        SYLHQLSDSPVALPK"
        /besthit="qcoverage 100 , hcoverage 100 , similarity 100
        , identity 100 , evalue 7.51e-119 , alnlength 175 ,
        Bacteria , Proteobacteria , WP_015589210.1 MULTISPECIES:
        cytochrome c family protein [unclassified Wolbachia]"
gene      21531..22292
        /locus_tag="wEsol_00443"
CDS       21531..22292
        /locus_tag="wEsol_00443"
        /codon_start=1
        /transl_table=11
        /fullproduct="qcoverage 100 , hcoverage 100 , similarity
        100 , identity 100 , evalue 1.46e-184 , alnlength 253 ,
        Bacteria , Proteobacteria , WP_012673268.1 MULTISPECIES:
        alpha/beta hydrolase [Wolbachia]"
        /cog="Mhpc COG0596 282 Predicted hydrolases or
        acyltransferases (alpha/beta hydrolase superfamily)"
        /pfam="Hydrolase_4 Abhydrolase_5 Abhydrolase_6
        Peptidase_S9 Abhydrolase_1 Abhydrolase_2 DUF2920 BAAT_C
        Abhydrolase_1"
        /product="alpha/beta
        hydrolase"
        /translation="MDYCKLFDGNNNGHIA YRKLQGKKASVVFFGGFASNMDGTKATAI
        YKFCQENDVALVLFDFYFGHGHSSGNFIDYTISDWQKNCAKVMSELTSKQIIIGSSMG
        GWLMLLTALQFPEKIAALIGISSAPDFTEDLIFKQLSGKQKEELDSKGVIDFTSEHCT
        YKITKNLIEDGRKNLLLNKKTIDINCPVRLLSINDKDVPYQTSNLAEKIKSTDVEV
        HLIKSAEHNMSDNHSLEVLFKTIREFCNQTAFCDF"
        /besthit="qcoverage 100 , hcoverage 100 , similarity 100
        , identity 100 , evalue 1.46e-184 , alnlength 253 ,
        Bacteria , Proteobacteria , WP_012673268.1 MULTISPECIES:
        alpha/beta hydrolase [Wolbachia]"
gene      complement(22476..>22359)
        /locus_tag="wEsol_00444"
CDS       complement(22476..>22359)
        /locus_tag="wEsol_00444"
        /codon_start=1
        /transl_table=11
        /product="hypothetical protein"
        /translation="ICKVPKCDGANRHTAAVSQPLTRSGMTVFQIVGKSKSV"

```

gene 604..678  
 /locus\_tag="wEsol\_tRNA-03"  
 tRNA 604..678  
 /locus\_tag="wEsol\_tRNA-03"  
 /gene="tRNA-Gln"  
 /intronpos="0..0"  
 /program="tRNAscan-SE"  
 /cove\_score="61.8"  
 /evidence=predicted  
 /type="Gln"  
 /anticodon=TTG  
 /product="tRNA-Gln (TTG) "

# ORIGIN

```

1  ggatccagga aagtttgctt gtttacaagc aaactagcat agaaagtggg tacaacgttt
61  tcgatgagat tatatggaaa actggattcc agtgtcaagc actggaatga catcacaggg
121  gcactgggat gacaccttta cgtttgaggc aaactagcta taacacttaa catactacct
181  ttgcaaacia atgttcatac agtacgcgct ggcgttattt tctcttgatg aataaacctc
241  ggtagagtat agtagcagtg cgtttatata gattctaata agtagtttag ttttgattta
301  tacaactttt tcaaattttg aagaagctaa aactatttct gaagaattgt taaacgagaa
361  attaattgta tgtgtaaata tatttcccga agtgaattct ctgtatttat gggaaggtaa
421  aattagtaat agttgtgaag tagtagcaat tatgaaaagc aaaaatgata aagttgataa
481  aattgtagaa aaaattgaag caatgcattc ttatgatcag ccagctattg ctgtgatgcc
541  catagaaaaa gcaaataaat cttttactaa ttgggctaata agtgttattg atgtaagtag
601  tattgggggtg tagccaagtg gtaaggcagc ggtttttgat accgccacgc gaagggttcga
661  atccttccac ccagcccatg ttgaagtggg tgtgaaatga tatcactttt ctataaatta
721  agattattga attatatatt aggtagtcta aaagatatata ttgtgaaact gtttctcttc
781  acaatgtatc tttacacatt cagcattgtg ctcatgtttc tcagcaatgg tttttggtat
841  gctgtagaat tttgctcttt caaaaatgag ttttaccgtt tgtttcaata ttgcaagtgg
901  tattatgaaa ataggggaaga tctcggttac ggaatttcta ttcgaatatt agtggcggtc
961  cttactccgc attttctcta taaattatta cttggcacag gctggaagtc ctttttaaag
1021  gaaaagataa tacagatact caacacaaga agaaaaaagg gtagtgagtt cagtaacagt
1081  agcaaaccac gtggcagtag ttatagtgat aagaataatt acagcaataa cagtggtaac
1141  aatgagcgctc aagctcaaga tgcaaagcga aaagtaaaca tgataaagca gctattaatc
1201  aaagatatag aggcaactat agataggaga ttgaattata tttttttcgg taaaaggagt
1261  aaacctcatt aagtatataa aaaggcttta tctagtaagg cttttttaagg ttggctgtat
1321  tttatttttt acgtataaccg gatcacaaac agccaatata catgtgtgca caaaatcttg
1381  actaaagtct gataaccaag aaattgcctt acgttttttct accaagcttt ctgttttttt
1441  gcagtgactt gctgcatcaa tcattgcctg cgctattact gatttccaca gcaaataata
1501  cttttgtata tcatctgacg tactatttgt ttcatagtgg ttaaaaaatt ctttaaaatt
1561  gaagttgttt gacataatga tacctctttg gattgaaatt tgaaatgatt tgagtttatg
1621  tcgccacagc agattccgct aacaagcagc gggatgacgg ttgtcgttta gccataaaca
1681  ttaagaaatt taccaaacga aaaaaaaggc aaaagaagcc ctgggggttat tatccgcttt
1741  aaaatattgg cgtttttttat gttttaaacg cttgacaagc gagattcagc cgcttttaat
1801  tgcaactaac ttacgctgca aatgttttaag aaatttacta agcagaaaaa aagacaaaaga
1861  atccccgagt tagctagtct tttactatct ctgtcgagta ttggcatttt ttgatgtctt
1921  gtaacgcttt ataagcgctt tcagcttatt tagataaaaa tctagatgta gatgaagttt
1981  tgtaaagaca tacagtatct atatactgca aaaaattgaa cataagacgc cgatacatta
2041  agtaatcctt accttttaat ctgcagattg gcgaaagcaa atacaatagc ttcagtttca
2101  tgataagggg gctggcgagg tttgtcaagg aagttttttt gtttctgcgg gctacctggg
2161  ttttctactg aaattttgaa aaatgtaatc tactcctata ttcaaataa tcaagcagta
2221  attcaaaatc agccattgag ctttttgctt tattatacgc gagattgagc agctctttgt
2281  cctgatataa atcagcaaat tttaaattcca tacatcctga ttgttttggt cctaaaatat
2341  ctccactgcc tcttagcatc atatcccttt cagcaatgta aaatccatct tgtgactcac
2401  acatgatctt taactttgaa gatgagcttt tacttaaatt atcgtataat aatacacaaa
2461  aagatggcct gtttcctcgc cctactctgc ctcttaactg atgcaattgt gataacccaa
2521  attgctctgc attttctata atcatgatgg ttgcatctgg cacatctata ccaacttcta
2581  tcacagtggg tgcaacaagc agagaaaatt cattcctttt gaaggaaaac ataacttgat
2641  ctttctgctc ctgagtcaat tttccgtgta ttatcccgac tttatcaaga aatgtttttt
2701  gtaattcctg aaaacgcata tctgctgcag caatattggg ctcttcgttt tcttctatat
2761  atggacaaat ccaatatgct ttttcgcccc tgtttatagc accttttagc ttttcaataa

```

|      |            |             |             |             |             |             |
|------|------------|-------------|-------------|-------------|-------------|-------------|
| 2821 | catctggcac | cctactaatg  | ttcatagtta  | cagtttttat  | tggcaatctg  | gatttttggtt |
| 2881 | tttctttcaa | aattgaacat  | tcaacgtcac  | catacatagc  | ttgctgcaaa  | gttcttgga   |
| 2941 | tgggagttgc | agtaacgaaa  | agtatatcgg  | catttttctcc | ttttcctacc  | aagcgatttc  |
| 3001 | tctgcatcac | tccaaatcgc  | tggtgctcgt  | ctatgactgc  | aagccctaaa  | tttttaaagt  |
| 3061 | taacgtagc  | ttgaaatagt  | gcatgagtgc  | caatcactat  | atttaaaaca  | ccacttgcaa  |
| 3121 | gttcgttcat | gataatcttt  | ctttccttgc  | gcgaagtttt  | accagtaagc  | agcgcaactt  |
| 3181 | ttatatcggt | acaggataaa  | acttcctcaa  | tccaattata  | atgttgctcc  | gccaagatag  |
| 3241 | tagtcggtgc | cattagagct  | gcctgcatgt  | tgttttctac  | cacatttatc  | attgcaaaaa  |
| 3301 | gtgcaactac | ggttttgcca  | ctaccaacat  | caccttgag   | caagcttatc  | atgagatact  |
| 3361 | tggatttttg | tctctctgag  | atctcatcta  | ttgcacgagt  | ttgatcattt  | gttaattgaa  |
| 3421 | acgacaattc | atttaaaact  | tgctctttgt  | atttactcaa  | tattataaat  | tctcttcccc  |
| 3481 | tttctttcac | atgatttttt  | cttgcaagtt  | tcagcgctag  | ctgatacgca  | aacaattcat  |
| 3541 | cataagcaag | cctttttcta  | caaacctcag  | cttccaccaa  | tgagcttggt  | ctgtgcaact  |
| 3601 | ttatgatgct | ttccctccaa  | cttaaccatt  | ttttttgctt  | gattaatgta  | tcattctatcc |
| 3661 | actctggtaa | atcaggcaat  | tccttttagat | tagagcttat  | tatgttccca  | atgagcttat  |
| 3721 | tggtaatgcc | acggcataat  | tggtaaactg  | gctctatgca  | agctattttt  | ttaaattggt  |
| 3781 | tgatgtcaag | cgacacgtaa  | tctggatgag  | taatttgcca  | atgttcagca  | aatttttcga  |
| 3841 | gtttgccact | gatgatcaca  | ttcgctccaa  | ttggaaatag  | tttatataaa  | tacttaactg  |
| 3901 | agtaattaaa | aaagactatg  | aatatatact  | gactctcact  | ttcaacgact  | attttatatg  |
| 3961 | gtctacctct | aaaagtgggc  | gactgatgct  | cataaacttt  | tgcaatgaaa  | gttgtaaatt  |
| 4021 | ctccaactcg | agcatcagat  | agtaacttgc  | ttctatccac  | ataactaagt  | ggcttataaa  |
| 4081 | acagcagatc | caccaccttg  | tccccaccac  | aaagttagg   | caatattgag  | gaatggaact  |
| 4141 | taggtatatt | ctccagcctg  | ctatttagaa  | aaatctgatt  | gctcattgag  | attcatacat  |
| 4201 | gtgtaaaact | gttatagagc  | ctttttaaaa  | tcttgtcacc  | ttatggtcag  | gtatgcacta  |
| 4261 | tagctagcac | agctctctaa  | cgttataaccg | cgattcattc  | gcggtatctc  | agccgctaac  |
| 4321 | acgtaacgga | atgacgaatt  | tggtgttttt  | aaaatcatcg  | gtaagcctaa  | gttacccta   |
| 4381 | actatatttg | ctatcatagg  | gcttatagta  | ggatattttat | taacttatta  | atcattttta  |
| 4441 | tgtattatta | tactatcagc  | agtctatatc  | aaggatttca  | taatgagtag  | ctctatatca  |
| 4501 | gaagaaaagg | aaaatccagt  | agttacatta  | agagctcaag  | cagaaaagtt  | tggtttttagc |
| 4561 | aagttaagag | ctggtaaaga  | caatgctgaa  | gcgaattctg  | gtaatacagc  | gttcttagat  |
| 4621 | tttcagagaa | tggattttgt  | tattaacggc  | aaaagtataa  | gtagagattt  | gattgccgag  |
| 4681 | ctatacaaa  | aacatgatag  | tttactgcca  | aaaagtgaag  | gtaaaaatga  | agactaccgc  |
| 4741 | ccatttgcaa | gaaaagtttt  | taaggagatg  | ttcaaatacg  | ctaaggcaga  | agttccaagt  |
| 4801 | gactctatct | tggagaagatt | agttatcaat  | tgtaatcaag  | caggatatga  | agctggtgta  |
| 4861 | catatagagt | ttcaaggtgc  | acttagccag  | cattcattca  | taatagaaag  | acctgaaaaa  |
| 4921 | gtgataagta | ttgactgtgt  | tagccaaaat  | aatgtgagtg  | ttaaatctga  | tatgacatta  |
| 4981 | ccaatatttt | tccaaaggag  | tgacggtaca  | ttcggtgaca  | aggtgtatga  | tctatccagc  |
| 5041 | tcactagaat | tcacgcctta  | gtctcaagat  | gataaaaaatg | taacatacac  | aatggtaac   |
| 5101 | ttgtcactta | ctgttcctga  | gagactgaag  | gactataata  | taggtgataa  | aagcttattt  |
| 5161 | gacattataa | aagaataactt | tcagaaattg  | tgcgagaggc  | ttggattttt  | taaaataaaa  |
| 5221 | atagagcatg | gttttaggcga | tccactagaa  | gtaagcgacc  | atctggaaaa  | tatggaacct  |
| 5281 | cctattcgta | gtaatgagca  | cggcctgaat  | taaaatatct  | tgagcttggt  | tgcacaatca  |
| 5341 | atcacttcag | catttagaaa  | ttgtttttta  | aaccagggtat | actgacgttt  | cgcgtagtgt  |
| 5401 | cttgtgtttg | tttgagcaat  | ttgtatcact  | tcgtctaaag  | taatctcacc  | tttcaagtac  |
| 5461 | tttataattt | ctggcactcc  | gtgtgctttc  | atagctggca  | aatgtggggc  | taggttcatg  |
| 5521 | ctaagtagct | tttttacttc  | atcaattgct  | ccattttcaa  | tcattgtaat  | gaaacgagaa  |
| 5581 | tttatttttc | ggtatacatc  | ttcacgttta  | ggcagaattg  | tatatatctt  | aaaattattg  |
| 5641 | aataaaggag | gctgtctatt  | ctcttgccat  | acaaaaattg  | acttgccagt  | ttcagtgata  |
| 5701 | acttcaagtg | cccttgaaa   | gcggtgcgag  | tcattcatga  | acactttacc  | ttgaatcctt  |
| 5761 | ggatctttgc | ttagcgctaa  | tttgtaaaac  | tcctctttac  | ttaaattttt  | cctgagctca  |
| 5821 | cttacgtttt | ttctcacttt  | ctgacttatt  | tggtggcattg | atgataagcc  | tttgattaaa  |
| 5881 | ctgctgatgt | aaagcccgct  | tcctccagtg  | atgataggta  | tttgagcatt  | ttctaagtgc  |
| 5941 | tgattaactt | ctttttctaa  | atcttctaac  | catagaccca  | cggaaataatt | ttcttttgct  |
| 6001 | gaaacataac | catatagttt  | ataaaatact  | tcttgctttg  | gtggttgagc  | agtaattatg  |
| 6061 | ggaattttct | catatacctg  | ctttgaatca  | caatttatta  | tactaatatt  | tccatatttt  |
| 6121 | tctatcaggt | tatcgcataa  | ttctgattta  | cctgaggccg  | taattcctgt  | aataattact  |
| 6181 | atattatttt | tcatttatat  | taatttaatt  | aacatatgat  | aaagtgtagt  | aaaagtgttg  |
| 6241 | attctacaat | ctaaagtttg  | gagattttta  | tggcagaaaa  | caacgacaat  | aattcattta  |
| 6301 | ctaagcgttt | cacaaacagg  | actcctggcg  | gtacagggga  | aggtttttcc  | agtaagtatt  |
| 6361 | cgtctcaaaa | caccaaagaa  | cgggcattag  | gggaaaaaag  | aaaaatttct  | gaattagcag  |

|      |             |             |             |             |             |             |
|------|-------------|-------------|-------------|-------------|-------------|-------------|
| 6421 | gcaaaaaaac  | cgaatccaag  | gaagcttttt  | ctgaaagtgg  | cggcataaaa  | agtaaaagca  |
| 6481 | gaactgtcaa  | tgaaagatct  | tttgctgatg  | caacaaaaag  | aagtaggtca  | gatcttgtat  |
| 6541 | acttagtccg  | tggtaaagat  | cgtggaaaat  | cagcgtggca  | ttatgtgtta  | gttgataaag  |
| 6601 | agaaaagaga  | aatgttttcta | gcaaaaagca  | gaactggctc  | tatagatggt  | gcagactatg  |
| 6661 | gagagatttt  | gtattcagga  | tggggagagg  | atccaccaca  | ggcaataatt  | gataaagtca  |
| 6721 | atgaagagtt  | tgggttgtag  | caaactctgca | taacaaatgg  | taagctgcgt  | tgcattacgt  |
| 6781 | ttacaaaaac  | tagcagttac  | tatataagat  | acagtgaac   | aaaactgata  | tagttgttat  |
| 6841 | gaataagttt  | ttagctatat  | ggtatctaaa  | ataataaatg  | caatacagaa  | caatttatta  |
| 6901 | gtgtgttttc  | caacagaaac  | agtgtatgct  | cttgcttgta  | atgcactaga  | taatgaatct  |
| 6961 | ataggaaaaa  | tatatcagat  | aaagaaacgc  | tctcaaaaata | aaccactgtc  | tataattgtt  |
| 7021 | agtgatattt  | acaatttgac  | aaaaatagca  | aaggtaaagg  | aaagatatat  | tgatttaata  |
| 7081 | aaccactttt  | ctcctggacc  | aattacctat  | atthttaccac | ttaaaaacaa  | caacatattg  |
| 7141 | ccaaacgaat  | tcttttaaga  | tagtataggt  | atcagaattc  | ctgagcatcc  | tattgcaatt  |
| 7201 | tcaataactaa | acaaactgaa  | agttccaata  | gttgcaacta  | gtataaatat  | ttcaggagaa  |
| 7261 | aaaagtgtat  | gtaaggcaga  | cgatatacca  | caatccatta  | agcaacattt  | atctgcagtg  |
| 7321 | attgaagatg  | acgaattagt  | ttctgggtata | gaatctacta  | ttattgactt  | aaccgaagat  |
| 7381 | aagattaagg  | ttttaaggga  | aggtgcaatt  | ttattacaaa  | cagtaaacaa  | tgcattttca  |
| 7441 | aactaagatc  | tataggagaa  | agaatgaaaa  | aagtaatagg  | tcacaaccag  | gccaaaaaaa  |
| 7501 | aattaatgaa  | caacttatct  | gttcagtcct  | ggctgatctg  | tggtaaaaaa  | ggtataggaa  |
| 7561 | aagcaacact  | tgcaaaaatcc | ttctccaatt  | ggttactcat  | aaaaagctat  | aatgaagtag  |
| 7621 | cattggactt  | acacattggt  | gaaggtgata  | ctatcggaat  | agaaaaagtc  | agagaaatga  |
| 7681 | aaaactttct  | acacttaagt  | cccattcaat  | cagaacacaa  | aatagctata  | atagatagct  |
| 7741 | tagaggcaat  | gactaataac  | gctaaaaacg  | caatattgaa  | aatattagaa  | gagccgccaa  |
| 7801 | aaaattctaa  | gatattttata | attagccata  | agccatatga  | tatacaaacc  | actatcttgt  |
| 7861 | gtaggtgctt  | tcagctgaat  | ttactcccat  | taacttatga  | tgaacaaaag  | caagttgttt  |
| 7921 | catctcaatg  | taaatttgat  | gatcaaatat  | ttgatgaaat  | cattacttta  | tttcttgtaa  |
| 7981 | tgccagggaat | gataataaat  | gcaataagta  | gtgatgctta  | tgaagcatat  | aagtgccttt  |
| 8041 | ataaattttct | tcattgattta | aagaatccca  | atatgattaa  | taaagtaatt  | aatagcgaaa  |
| 8101 | tcgaactaga  | actagcatca  | tatataattc  | aggccttcat  | tttagaaaagc | ataaagagag  |
| 8161 | aggtaaataga | tgttgaaatt  | ctgctaagtc  | agtggaaaaa  | aatagatgaa  | ctttttgttg  |
| 8221 | ttgctaagca  | actccactta  | gataaaaagc  | atgttttagc  | taatgtagtt  | aatatcatga  |
| 8281 | cataagttta  | caaagtataa  | tactttttaac | ataaattcat  | gataaaaatcc | tgttaattta  |
| 8341 | atacttgaag  | tatataattt  | gactgataat  | aaattaactg  | tatggcaatc  | aatagaagtt  |
| 8401 | ttgacgaaaag | ctatactgaa  | tatgcagaaa  | gaattgagtt  | caatcaagaa  | tatagcttta  |
| 8461 | gaccaggacg  | tcaccttaga  | aaaaggaaaag | gagttattta  | gtggcatcta  | tgaggcaaat  |
| 8521 | tttaagctaa  | acaaggcaat  | caatatagcc  | actttgccaa  | aaattggcta  | tcatatgcta  |
| 8581 | aatggtgagt  | ttgttgtagc  | taatcatatc  | acggaagagg  | aagtaaggat  | tcctagagat  |
| 8641 | tttcattacc  | ttaaagtcgt  | aaaatccgat  | catgataatt  | ataaattaac  | gttttgtaat  |
| 8701 | tttttaggta  | atgagttttt  | tgaatataaa  | aagtatgata  | cacaatatct  | tggcgtttca  |
| 8761 | gatgaatata  | agtttgtagg  | ttttgtagt   | gtaaaaaaga  | ctcataatct  | aaaatttaag  |
| 8821 | gaatacgttg  | gtcatgcacc  | taaatttttt  | gctgcagaag  | ggcctattga  | gcctggatcc  |
| 8881 | caaaaccatg  | taattgatct  | atttgagcta  | gtcaaaaagt  | gtaaaggtag  | aaaagtggga  |
| 8941 | acctttgctg  | atgaatttg   | ttattttgat  | gatcaaaaata | aattacatta  | ttataattat  |
| 9001 | cacaaaagt   | tagaaaagtaa | tacttatgat  | cctgaaaatt  | tcagtgtaaa  | aatgataaat  |
| 9061 | atagatgtga  | gcaaaaatcga | taaattctac  | ctcattgcag  | aacaaggtag  | tataatcatt  |
| 9121 | catcctat    | gggaaaaatt  | agacatat    | taaagt      | tttagagtag  | ctaaagcttat |
| 9181 | tgttattata  | atgatccgat  | taggtctgg   | agtattgtgt  | tatggaagat  | aaattgcttg  |
| 9241 | aatcagtaaa  | aaacaaaagt  | tatttcagta  | aagcagtcga  | atggtactgc  | cataggtatc  |
| 9301 | tgttttgtag  | agcagaaaaga | tcttgtagtg  | cattaatagt  | atcgcttctc  | ctagtagct   |
| 9361 | tatgtttatt  | aacattaaac  | atatacctgt  | tatttcctgt  | taaaaaagat  | ttaaattttg  |
| 9421 | tgaagtatat  | gaaccacaca  | gaagatgagt  | tctctgcaat  | gcataagctt  | agtttcagta  |
| 9481 | aaaaggaaga  | tgaatacact  | tccacagcga  | ggtactta    | aagtaaatat  | attgaagtag  |
| 9541 | acgagtccat  | taagaccgtt  | gaaccgaagt  | accaagaaaa  | ttttataaga  | aacaattcta  |
| 9601 | tacataaaat  | ccatcaaggc  | tttcaggaaa  | aaacgaataa  | tgaagctgtt  | tcatccaaaa  |
| 9661 | gaaaaattac  | caacataaac  | gtaataacat  | tatctattga  | ccgatcgacc  | aaggacctag  |
| 9721 | ttacatttg   | tggaaatgct  | actgtagttt  | ttacaaccga  | gcaaaaataag | gaggatactg  |
| 9781 | tggagattag  | cttcactttg  | tcgaatataa  | aagcaactct  | ggctggtata  | ataccattta  |
| 9841 | aattttattgt | taatggttat  | aaatacagat  | tttaaaaatat | tacttggtag  | ctaaaaaaa   |
| 9901 | taaccaaaagt | gcatgtagca  | gtaataactg  | gaggtaaaac  | tagaagaatt  | ggtgtttttt  |
| 9961 | taataaagta  | attctgagaa  | ggttttaaga  | aaaaggcggt  | gtaaattatc  | ggtaaaaagt  |

|       |             |             |             |             |             |             |
|-------|-------------|-------------|-------------|-------------|-------------|-------------|
| 10021 | acagagcggtt | gagtatagta  | ctaacaatta  | acactagagt  | tacaaacaca  | gaaagtatta  |
| 10081 | cattgccaga  | gttgaaaaca  | gcttgaaaaa  | tgagaaat    | acccccaaaa  | gtcggagcag  |
| 10141 | gcggcacccc  | tatcatagac  | aacgcaccta  | tagcaaatgc  | tgtcatgcta  | attggcatac  |
| 10201 | tgcgctctat  | accgtaaata  | ttatctatat  | acttctcacc  | tgctcttggt  | attattgctc  |
| 10261 | ctgcaacgaa  | aaacaaagt   | atTTTTgcaa  | atgCGTggca  | aactaattgg  | aaaattgcaa  |
| 10321 | ccctcatgct  | gagctcacta  | aaaattgaag  | cgaataatat  | aatatacgac  | aattgagaga  |
| 10381 | tggtagagta  | agcaagcaat  | TTTTTTaatt  | ctttttgctt  | taatgcaatc  | aatgatgcag  |
| 10441 | taataatagt  | aatccagca   | gcgtacggaa  | gccaccctcc  | agcaaaccac  | ctttgctgcg  |
| 10501 | caaaacgttg  | catgttaccg  | ataccgaaag  | tgtataatat  | aactttttatg | atgatgaaaa  |
| 10561 | ctccggat    | cacaacagca  | acagcatgca  | gtagtgcgct  | tacaggaggt  | ggtgcaacca  |
| 10621 | ttgcttttgg  | taacccaaaa  | tgcattggca  | ttaatgcagc  | ttttcctatt  | ccgtaaatca  |
| 10681 | gcatagcaaa  | acacactgca  | atgaaagtga  | tgagtgaagt  | atcaaatttg  | aatattccac  |
| 10741 | cacttacaaa  | gtctaaagta  | tgaaattcat  | tatataaaag  | gcctattgca  | ggaaaaaaca  |
| 10801 | ataccaaaga  | agagaaaaat  | agcacgccaa  | agtaaatagc  | ccctgcaatc  | attgattcat  |
| 10861 | ttgttgagtt  | gtaagtaacc  | agagggtatg  | tactaatagt  | tagaagctca  | taaaagacaa  |
| 10921 | atgtagttag  | caaatactca  | gaaaaagcaa  | taaacattgc  | acagctaatt  | gatattgaaa  |
| 10981 | aaaagcatag  | aaaacttgag  | tgattgctat  | cagcatagtt  | attctgcata  | taacatattg  |
| 11041 | catatatact  | ggtcagcacc  | cataaaaacg  | atattaataa  | actgaatatt  | actccggtag  |
| 11101 | actctagctt  | taaactaatg  | tgcaaatat   | taccaaaatc  | catgaggata  | aattgagaat  |
| 11161 | gatcaccata  | caccaaatat  | aaagtgcaca  | gacacgtata  | cgtaaacaga  | agtacagaag  |
| 11221 | aagtgcacgt  | aatactattg  | ttcactccgg  | gccatttacc  | agtaaaaaaa  | ataactaacg  |
| 11281 | cacttaaaag  | tggaatcaac  | gcagtaatta  | ataaataatt  | ctcagtaatt  | gaaaatggta  |
| 11341 | aggaaagata  | cattaagata  | tagtccatta  | aattttttgt  | ttaggtaaag  | ctagaattat  |
| 11401 | actaaaatca  | tagaaaaact  | gctatgtttt  | tttagttgtt  | gcatatgcta  | tagctatact  |
| 11461 | gccgcggtat  | ctctagatcc  | cgctaacacg  | tagcgggatg  | acgaatttgt  | cgttacgtca  |
| 11521 | taccgcgatt  | cattcgcggt  | atctcatccg  | ctaactagta  | gcgggatgac  | gagcttatcg  |
| 11581 | tcatgccacc  | gcgaaccgtc  | ataccgccgc  | ggtatctcag  | catagattcc  | gctaactagt  |
| 11641 | agcggaatga  | cgggttttca  | aattgttgta  | agtcggttta  | gctatataga  | tagcataaag  |
| 11701 | tcaactgcat  | aaattgaaac  | aatatctgct  | agacgcaa    | tacaacaaat  | gcagtagcgt  |
| 11761 | aatctccatc  | gtcactcaga  | gaaagatgaa  | ttttggagat  | aaaatccttg  | ctaacggtaa  |
| 11821 | gatatggctt  | gcctcttaca  | tcattgtata  | tttctatatc  | tttcattata  | ataccctgac  |
| 11881 | cactacctcg  | tgcttttaaca | aaagcctcct  | ttgccgcaaa  | acgcttagcg  | aaataccttg  |
| 11941 | ctcgcat     | ttgactatta  | tactttctac  | ttagctctat  | ttctttctca  | gtgtagattc  |
| 12001 | tattgagaaa  | tttttccccg  | tattttttgta | atatcctcga  | tactcttggt  | atatatacta  |
| 12061 | tgtagtgcc   | gataccgtgt  | atcattttgt  | gctaaagtga  | tttattgctt  | cctcaatctg  |
| 12121 | catttccttt  | acctctccag  | ttgctctatt  | ttttacttca  | actatctttt  | catctattgc  |
| 12181 | cttttttccg  | acaattat    | gccacggcaa  | gcctatcaga  | tccattctag  | aaaattttac  |
| 12241 | tcctacactt  | ccttccgtgt  | catcgtaaag  | cacttcatcg  | ctcttcaaag  | ctttgtatat  |
| 12301 | tttatctgca  | gcctccgtta  | ctttcgtttg  | taaattgatt  | aaaccaattc  | tgaaaggagc  |
| 12361 | caccgattct  | ggccagataa  | ttcctttatc  | atcatgaaaa  | gcttctatta  | ttgcaccgac  |
| 12421 | aagccttgaa  | actccaatgc  | catacgaacc  | catatgtata  | ttgacatttt  | ttccatcttg  |
| 12481 | agaagtaaca  | cttgcccttca | taggctttga  | gtatttgtcg  | ccaaaataaa  | aaatatgccc  |
| 12541 | tatttcaata  | cctttactaa  | catttaactg  | ctcttgtgat  | atagggcaag  | tctcaggatc  |
| 12601 | atgcatatca  | tctgcaactg  | cgtatatact  | cttcaaaactt | tcaacatctt  | cgctttctag  |
| 12661 | caactcagaa  | aatttggtgt  | cgtaatatata | agtgccttca  | ccagtgtttg  | ccaatatatg  |
| 12721 | aaactcgtgg  | ctcaaat     | ctccaattgg  | ccccgtatca  | gctcgaactc  | caattgggggt |
| 12781 | aagtcccatg  | cgtttgaaga  | tttttatgta  | agttttgtac  | atcaaattat  | atgaattcag  |
| 12841 | tgacacttcg  | taatctacat  | cgaagctata  | tgcatccttc  | atcaaaaaat  | ccctgccccct |
| 12901 | cataacgcca  | taacgtggtc  | ttacctcatc  | acgaaaacttc | cattgaattt  | ggtataaaca  |
| 12961 | aagtggcaaa  | tctttgtaac  | tttttaccat  | atctctaatt  | agatcagttg  | ccacctcttc  |
| 13021 | gtgcgttgga  | ccaaaaagca  | tgtcttcctc  | atgcctatcc  | cttatacgta  | acatttcctt  |
| 13081 | accgtaatca  | tcgtaacgcc  | ctgattctcg  | ccaaagattt  | gctggttgga  | cacaaggcat  |
| 13141 | caacacttca  | atagcaccgg  | atttgttcat  | ttcatctctg  | ataatgtctt  | caatatTTTT  |
| 13201 | aagcactaag  | agaccaagt   | gtaaccagga  | ataaatgcc   | gatgctatct  | gctttattaa  |
| 13261 | acctgcacgt  | aaagaatatt  | gatgggagat  | aatttttagca | tgagcagggt  | tttccttttag |
| 13321 | agttggtaag  | taatacttgg  | ataaacgc    | ataatagatc  | tgattgtatt  | aaacaatctt  |
| 13381 | aatacaatca  | gatctatagg  | taaacttatt  | ttgaaaaaga  | aggggaagtgt | gtggtgcttt  |
| 13441 | ccttaacgta  | ctaataccga  | tccccctctc  | aatttagtag  | ccgctccacc  | aaacatttta  |
| 13501 | caacggtcct  | taacagaaga  | agctggttagc | tttcctgctt  | catttagtcac | tggtgttgca  |
| 13561 | ggaagagctt  | cagggtttcgt | ttttaaatta  | acaggcttag  | gcgatatcag  | tggtttatct  |

|       |             |             |             |             |             |             |
|-------|-------------|-------------|-------------|-------------|-------------|-------------|
| 13621 | gcctttggcg  | cagaatgtga  | gggagtgtta  | aataaaccat  | acgcgtcaag  | ttaaggaatg  |
| 13681 | tagagagctt  | aaagtagata  | ccctgggtctt | cctatatctg  | tctttcaaag  | aaaactttga  |
| 13741 | ccagattata  | gtaagctttt  | ttagaaaaat  | ttttaaaatta | ttgacaatat  | tgtttaatat  |
| 13801 | caaaaagagc  | tctctaaccc  | gccttttcaa  | ttcaataaat  | gcctttgtta  | aactgagctc  |
| 13861 | cgtgttcttt  | tttagtttta  | cacagccaat  | cattccgtga  | aatacgagaa  | tagcacataa  |
| 13921 | ttttgcgtat  | agctcgcaca  | atactctaaa  | tggatttgtc  | tttcctttta  | gtttatcaag  |
| 13981 | attgatatga  | cttttatata  | gtttaaatag  | taattcgatt  | tgccatctta  | ctctataaac  |
| 14041 | cgtcaatatt  | tgttcagcat  | taattttact  | ctctggaaca  | ttagttataa  | atattgacca  |
| 14101 | atctaataac  | ttttgattct  | tttgagaaga  | tgtatatcca  | tgtgactttg  | ctaatttatt  |
| 14161 | agcctttctt  | cttctagcca  | tagactgttc  | ttcagttagc  | ttttgacata  | taattcttac  |
| 14221 | cttaattttt  | acttcctttc  | ctaataatac  | ttctttttct  | gaagataatt  | gaccttccaa  |
| 14281 | atactccaat  | agctctattt  | tttgatttgt  | ttctatatca  | tatatattgg  | tatcagactt  |
| 14341 | ataacgacta  | acaaaatatg  | cacctgtctc  | atcaatctgt  | ttaaaagaac  | taggcacaaa  |
| 14401 | gtagcccaag  | tcaaataatta | gcaaatcatt  | ggctgataaa  | ccgttcagat  | aatccctata  |
| 14461 | accttgatcc  | gaccttattc  | cttcataaaa  | atttaactta  | tctagcgctt  | gattcaggtg  |
| 14521 | atcaaagact  | aactgtagct  | ttattcctga  | tttggтата   | ttctcacaat  | ctctatagct  |
| 14581 | actgccatat  | cctttgtaca  | tatcttccat  | gctaattggg  | aggctaattg  | agctgctatc  |
| 14641 | caataattta  | acgcttccaa  | attgctgtaa  | aattttgcaa  | tcaatctgta  | gacttttttt  |
| 14701 | aaataaacac  | aaagcttcgt  | tatacatttt  | tttcatgaac  | tcaactgctt  | cttcactaaa  |
| 14761 | cctaaaatct  | aaaccctggt  | ttgtaatttc  | tatcgagtct  | tcatttagca  | attggcacat  |
| 14821 | tgtttctatg  | ctgcaatcat  | caactcctat  | gttaccacaaa | accatagctt  | ttatgaatga  |
| 14881 | tgagccatta  | agttttctct  | ttctttttat  | aaaacctact  | gcaattgata  | tttcgtctgc  |
| 14941 | tttttcatta  | aagaattcat  | tgaggctctt  | tgataagcaa  | gctattctgt  | ccattgtaag  |
| 15001 | ttctctcatt  | catatatcca  | agagaattta  | taccttatta  | ttttccttca  | ctctatcaac  |
| 15061 | ttactttaca  | cttttcctta  | aagtgaattt  | tctaactctgt | ctatgcagtc  | cctcaatagg  |
| 15121 | attggtagta  | taaattagcc  | ttctaactgg  | gccagaatac  | ttgaaatagc  | cggataagtt  |
| 15181 | ttcccaatta  | ttctgccaatg | attttacaac  | caatgggtac  | ttttctcccc  | atttttcttc  |
| 15241 | caactcaagt  | agataatttt  | cagctatttc  | tctacttgaa  | gcctgatata  | ctttttttaa  |
| 15301 | atcactcatg  | aaaatcttta  | catctttgct  | agatacatat  | ttcagagaat  | tgcgatatctg |
| 15361 | atgcaccaca  | catagctgta  | cctccgcatt  | aggaaacaca  | ctgtttatgg  | ctgtaggaaa  |
| 15421 | gcttttcagc  | ccatcaacgc  | aggcaataag  | gatatcttct  | actcctcttt  | cttttagatc  |
| 15481 | athtagtact  | cccaaccaga  | agttagctcc  | ttcactttca  | gccaaaataa  | agcccaagac  |
| 15541 | ttctttttctg | ccattttgat  | ctatgcccaa  | tatatgttac  | atgcattttac | ttacgcaatg  |
| 15601 | cccatcctct  | ttgactttta  | aaaacatgcc  | atccatgaac  | actatcggat  | atacagattg  |
| 15661 | cagcggacga  | ctgcgccatt  | cattgattac  | tggtagcaat  | ttgtcagtaa  | tacttgatat  |
| 15721 | ctctgctgcc  | gatattttgt  | gatcataaat  | ttcctcaaca  | tgtgacgcta  | tatctctata  |
| 15781 | accataacca  | ctggcaaaatg | tgctcaaaaat | cttcgtttca  | agctctggat  | gtaagtttgt  |
| 15841 | ttgccttttt  | ttgactattt  | gtgggttcgaa | acttccttct  | ctatctcttg  | gtgttaatat  |
| 15901 | ctcaaatgag  | cctgcacttg  | tacgtaaagt  | ttttgcattc  | ctcccatttc  | ttcggttatt  |
| 15961 | ttcttcgctt  | tcagccaaca  | agtggttttc  | tatttcaccc  | tctagactcg  | cctccagcaa  |
| 16021 | cctttttata  | aacgggtgtta | acgctccgtc  | ccttcctgtc  | agcggccttc  | cttctcgtat  |
| 16081 | agacgacagg  | atatttgttt  | ctaattcttt  | ataatctacc  | aatccggtag  | ttctgtttac  |
| 16141 | tactttctga  | ctcattgtca  | aacctccatt  | tttttatatc  | aattttattac | ttttttttcg  |
| 16201 | gtttgacaca  | gtttatttta  | ccatacgcgt  | caagttaagg  | aaaagtgtaa  | gtaaagttga  |
| 16261 | tagagtgaag  | gaaaataata  | aggataaaat  | tctcttggtat | atatgaatga  | gagaacttac  |
| 16321 | aatggacaga  | atagcttgct  | tatcaaaaaga | cctcaatgaa  | ttcttttaatg | aaaaagcaga  |
| 16381 | cgaaatatca  | attgcagtag  | gtttttataaa | aagaaagaga  | aaacttaatg  | gctcatcatt  |
| 16441 | cataaaagct  | atgggtttttg | gtaacatagg  | agttgatgat  | tacaaaaacag | ggtttagatt  |
| 16501 | ccaattgcta  | aatgaagact  | cgatagaaat  | tacaaaaacag | gttttagatt  | ttaggttttag |
| 16561 | tgaagaagca  | gttgagttca  | tgaaaaaaat  | gtataacgaa  | gctttgtgtt  | tatttaaaaa  |
| 16621 | aagtctacag  | attgattgca  | aaattttaca  | gcaatttgga  | agcggttaaat | tattggatag  |
| 16681 | cagctacatt  | agcctgccca  | ttagcatgga  | agatatgtac  | aaaggatatg  | gcagtagcta  |
| 16741 | tagagattgt  | gagaataata  | ccaaatcagg  | aataaagcta  | cagttagtct  | ttgattacct  |
| 16801 | gaatcaagcg  | ctagataagt  | taaattttat  | ggaaggaata  | aggtcggatc  | aaggttatag  |
| 16861 | ggattatctg  | aacggttttat | cagccaatga  | tttgctaata  | tttgacttgg  | gctactttgt  |
| 16921 | gcctagtttct | tttaaacaga  | ttgatgaagc  | aggtgcatat  | tttgtttagtc | gttataagtc  |
| 16981 | tgataaccaat | atatatgata  | tagaaacaaa  | tcaaaaaata  | gagctatttg  | agtatttggg  |
| 17041 | aggtcaatta  | tcttcagaaa  | aagaagtatt  | attaggaaaag | gaagtaaaaa  | ttaaggtaag  |
| 17101 | aatttatatgt | caaaaagctaa | ctgaagaaca  | gtctatggct  | agaagaagaa  | aggctaataa  |
| 17161 | attagcaaag  | tcacatggat  | atacatcttc  | tcaaaaagaat | caaaagttat  | tagattggtc  |

|       |             |             |             |             |             |             |
|-------|-------------|-------------|-------------|-------------|-------------|-------------|
| 17221 | aatattttata | actaatgttc  | cagagagtaa  | aattaatgct  | gaacaaatat  | tgacggttta  |
| 17281 | tagagtaaga  | tggcaaactcg | aattactatt  | taaactatat  | aaaagtcata  | tcaatcttga  |
| 17341 | taaactaaaa  | ggaaagacaa  | atccatttag  | agtattgtgc  | gagctatacg  | caaaattatg  |
| 17401 | tgctattctc  | gtatttcacg  | gaatgattgg  | ctgtgtaaaa  | ctaaaaaaga  | acacggagct  |
| 17461 | cagtttaaca  | aaggcattta  | ttgaattgaa  | aaggcggggt  | agagagctct  | ttttgatatt  |
| 17521 | aaacaatat   | gtcaataaatt | taaaaatfff  | tctaaaaaag  | cttactataa  | tctggtcaaa  |
| 17581 | gttttctttg  | aaagacagat  | ataggaagac  | cagggtatct  | actttaagct  | ctctacattc  |
| 17641 | cttaacttga  | cgcgtatggt  | ttatttaaca  | ctcccgaatg  | tgacggagat  | gtgggttcag  |
| 17701 | aaccagatcc  | tataccactg  | tcaagactcc  | cgcttctttc  | tctatggagc  | gattgggagc  |
| 17761 | ctgaagatgc  | ctgctcaata  | ggttctgggt  | ctgtctccca  | atfttcatca  | tcagatacat  |
| 17821 | tactactatc  | acttgataca  | ctactactac  | gactccgtgg  | tggtgggatc  | atagctaaca  |
| 17881 | ctttactgaa  | tgccctgccc  | aggtgacttg  | gctgttgtac  | gtcgctccct  | tgctttccat  |
| 17941 | taacgcctgc  | ccttcgtttc  | tgaagtgcct  | tactcaaate  | agccataaga  | tcttcatttt  |
| 18001 | tttcttggtg  | cccacctcct  | ttattgcttg  | acttctttgc  | tgctgtttcc  | tttaacttct  |
| 18061 | tatcacgctc  | ttccttgctc  | atgagatttg  | gtttttgttg  | tgttatttta  | ttaaatacag  |
| 18121 | cgctcatgtc  | aggtttaacg  | tcaggatcac  | taggactact  | agcattcttt  | gatgaagaag  |
| 18181 | ttccatttga  | acttgagagt  | ggaggtgggtg | gcggaggtgc  | attattatft  | tgaggaattg  |
| 18241 | ctgtaccaag  | tgttagcggg  | ggttgttgag  | gagtaagggt  | cggaaeatgt  | tccgaacttc  |
| 18301 | tcacttccgt  | ctgtgatcca  | ctatcttgct  | taacagacaa  | tccttttcta  | attagttcac  |
| 18361 | tgtccagatt  | attacaattt  | ttacacgcag  | atftttgtgg  | ttcttgagat  | gcagtatggc  |
| 18421 | caaattcctg  | tccattaaga  | cctgcttctt  | tcttattatc  | atctctagaa  | acggcaagtt  |
| 18481 | taataagata  | tgctactgaa  | gccaatgcaa  | caaccacaga  | aacagcaaag  | attgctaaag  |
| 18541 | gaactgctgc  | aatggcacca  | gaaccagaaa  | ctgctgcaat  | aacataaggg  | agatgtatat  |
| 18601 | aaattgcaac  | ggcagatata  | cataatgata  | aagcagcaat  | cgaattttta  | aggttagatg  |
| 18661 | tagacatttt  | ttacctcatt  | aaccactaga  | atactaataa  | taactagatt  | atcaacagtg  |
| 18721 | tcaataatta  | attatgaaaa  | ataaagtcaa  | aatttgaata  | gataaaactat | aagtaatata  |
| 18781 | caaccggcaa  | tagctataca  | atagacttct  | tgcatagaaa  | aaaggcaaaa  | tagctccaag  |
| 18841 | ttgtatccgt  | ttaggaaaagc | ggtaaaaata  | ggtagacaag  | gtagtataaa  | aagataacca  |
| 18901 | tagagtaaaa  | gtgagtttac  | aacaaatagt  | gtcatgcaag  | tagctgatac  | tggaatctag  |
| 18961 | tctttattat  | gcagccactt  | atfttaaagtt | aagtftttctg | gatccaagta  | gtcaaggcac  |
| 19021 | tgggatgaca  | ggaggctact  | ttcatgacac  | cattctfttt  | cctggatccc  | agtgtctggg  |
| 19081 | cactgggatg  | acatcatagg  | gacactggga  | ttacaccctg  | acaatcgtca  | tccagctact  |
| 19141 | tgttagcggc  | taagagatac  | cgcgaatgaa  | tcgcgggtatg | acggttcgtg  | gcggcatgac  |
| 19201 | gataacctcg  | tctcactgcc  | attaagttaa  | ggaaaaaaga  | tagattttat  | gggataatga  |
| 19261 | tgtataccaa  | taagttttaa  | ggtagtatga  | gtaaaaaagg  | cagtaataaa  | atfttattcaa |
| 19321 | aatgaattgg  | caagtctaga  | atfttatagaa | tcccataaat  | catcttcaaa  | agatttttatg |
| 19381 | agaaagagga  | agttatcttt  | tattgacata  | tttatcttaa  | ttttaagaaa  | aagtgtaaag  |
| 19441 | tcgctgcaag  | taataactaaa | cgaatfttatt | ttatatagga  | aaaaagacta  | taccgttact  |
| 19501 | gctagtgcct  | ttagtcaagc  | aagaaaaaaa  | atgaaacaca  | gtgcattttc  | agaaattaac  |
| 19561 | gaagggtgtg  | tttccttgta  | ctaccaagac  | caaaaattta  | aaacttgttt  | tggctttaga  |
| 19621 | gtgttagctc  | ttgatgcctc  | caaaatcatt  | ttaccaacaa  | gcgttgaaat  | aaaaaatgaa  |
| 19681 | tttggctcaa  | gaaaaatacg  | taaccaaaaa  | ccaaaagatt  | taggtgatta  | tgcaagtgca  |
| 19741 | acctttgcgg  | tttgtttaaga | tgtgctaaat  | aatgttgcca  | taagggtcagt | gttagataga  |
| 19801 | ggtaacactc  | atgaaattaa  | cttagcagat  | gaaatgctta  | aagttgtaaa  | tactaatgac  |
| 19861 | ttactgattt  | gtatatfttat | cttataaaatt | tctttctagc  | cttacaaaaa  | gaaaaattgc  |
| 19921 | ttatgtcatt  | cgatgtccca  | gatcatcttt  | taatgaagtg  | aatgctatgt  | ttgaagaaaa  |
| 19981 | aagcccatct  | agtgttgagg  | ttaccatatg  | tgctcagcgt  | aagataaaac  | aagaaaaatag |
| 20041 | tgggaataacg | cttcaaagtg  | gtactgccat  | ccggtgaaat  | tgaagtgtta  | gctacatcat  |
| 20101 | taatggatga  | acaaaagttt  | caaactggag  | gatttaagga  | gttatatftt  | ttacgctggg  |
| 20161 | gagttgagac  | atfttttgca  | aaactcaaag  | gaagactaag  | tctagaaaaa  | tttacaggaa  |
| 20221 | aaagtgttga  | gtctgtttaa  | caggatfttt  | ggtcagctat  | ctttattagc  | aacctagaaa  |
| 20281 | gtgttatgac  | agaagatgta  | gaagaagcgt  | tgaatatgga  | cttaaccgat  | gataagctta  |
| 20341 | agaggagcat  | taacaaatct  | gtctcatftta | acgcgatcaa  | aaacttggtc  | ttcgacattt  |
| 20401 | ttgctacgga  | atcagatact  | gactgcatta  | tggatcaatt  | atcaaagcta  | tttttgatga  |
| 20461 | acactttggc  | ggtaagaaaag | ggaaggaaaag | ttgatcgtca  | taagggtacct | tatcttcgft  |
| 20521 | cgttcaatta  | ccaaaaaagg  | gttagaaaaac | acataatfttg | actagaggta  | gtattcatat  |
| 20581 | cttctgataa  | taactgggta  | gcttattgcc  | atagctcctg  | taaaatgact  | tctaaacaaa  |
| 20641 | ctatfttctta | agtaatfttac | acttcagagt  | ttatctgctt  | taaagtfttac | tctattctgt  |
| 20701 | ttcagcatftt | gtcataaatc  | cttaattatt  | tctgactftt  | tagtttcagtt | tttaaccatt  |
| 20761 | ctfttccttaa | cttaatggca  | gtgaacctcg  | tcatcccgtc  | acttgtttagc | gggatctctt  |

```

20821 gttagcggct gagataccgc gaatgaatcg cggatatgacg gttcgcggcg gtatggacgt
20881 aagaaaacct ttcttgggtc agctatagag actctcatct ttagcgagct tcaaggtaat
20941 tggttgctat ttgcgaaaat attcgcataa tttaagtaac attacttaat aaaaattaac
21001 tatggagctt aataagattg cagcatcgat tttactttct gggctaataca ttatgatagt
21061 tagtaatgta gttgatatgc tttacagtcc agaagaatat aagattgaac accaaacgat
21121 agtagctgct ggcagcaatg agttccagca aaaaatcgag caagtggcgc ttgatattgg
21181 agcgctcatg cagaatgcta gctttgagaa aggtaaatca gcagcaaaaa aatgtatagc
21241 ctgccatagt tttgagaaag gtggaatgaa taaagtagga ccaaacttat ggaacatagt
21301 tggaaataaa aaggcccatc ttggtaactc attcaattac tcaaaagcag tgcttgacag
21361 aggtggaaaa tgggggtatg aggagctatt tgccttttta aagaacccaa aagcctatat
21421 aaaaggtaca cgtatggcat ttgcaggtat ttccaatcca caagaaattg cagatctagt
21481 tagttatttg catcaattga gtgatagccc gggttgcttg ccaaagtagt atggattatt
21541 gtaaattggt tgatggaaat aatggtcaca tagcatatcg aaagctacaa ggaaagaaag
21601 cttctgtagt ttttttcggt ggatttgcac ccaatatgga tggaactaaa gcaactgcta
21661 tttacaaatt ttgccaagaa aatgacgtag cacttgtgct atttgattat tttggtcacg
21721 gtcattcaag tggtaatattt attgattaca cgataagtga ttggcaaaaa aattgtgcta
21781 aagtaatgag tgaattaact agcgataaac aaataattat aggttcaagt atgggaggat
21841 ggctgatggt gctcactgcc cttcaatttc cagaaaaaat tgcagcacta attggtatat
21901 cgtctgctcc cgattttact gaagatttga tattcaagca attgtcaggc aagcaaaaag
21961 aagaactaga ttctaaaggt gtaatagatt ttacttcaga gcattgtaca tacaaaataa
22021 ctaaaaattt gatcgaagat ggcagaaaga accttctttt aaacaaaaag acaatagata
22081 taaactgtcc tgtgcgcttg ctgcatagca ttaatgataa agatgttcct tatcaaactt
22141 cattgaattt agctgaaaaa attaagtcaa ccgatgttga agtacactta ataaaatcag
22201 cagagcacia tatgtctgac aatcattcac tggaagtttt atttaagacc attagagaat
22261 tttgtaacca gactgcattc tgtgattttt agcaaaacac gatttttcat ttgagctttc
22321 ttcaacttaa aataaatata gaaaattgct gcctatagct aaactgactt agatttaccg
22381 acaatttgaa aaaccgtcat cccgctacgt gttagcggct gagataccgc ggcggtatga
22441 cggttcgcac catcacactt tggaacctta cagata

```

```

//
LOCUS      JAQZAU010000049          38835 bp    dna        linear    ENV 17-MAR-2023
DEFINITION MAG: Wolbachia pipientis isolate wEsol contig_33092, whole genome
            shotgun sequence.
ACCESSION  JAQZAU010000049 JAQZAU010000000
VERSION    JAQZAU010000049.1
DBLINK     BioProject: PRJNA929258
            BioSample: SAMN33142973
KEYWORDS   WGS; ENV; Metagenome Assembled Genome; MAG.
SOURCE     Wolbachia pipientis (insect metagenome)
  ORGANISM Wolbachia pipientis
            Bacteria; Pseudomonadota; Alphaproteobacteria; Rickettsiales;
            Anaplasmataceae; Wolbachieae; Wolbachia.
REFERENCE  1 (bases 1 to 38835)
  AUTHORS  Fiutek,N., Couger,B.M., Roy,S., de la Torre,J.R. and Connor,E.F.
  TITLE    Genomic assessment of the contribution of the Wolbachia
            endosymbiont of Eurosta solidaginis to gall-induction
  JOURNAL  International Journal Molecular Sciences
REFERENCE  2 (bases 1 to 38835)
  AUTHORS  Fiutek,N., Couger,B.M., Roy,S., de la Torre,J.R. and Connor,E.F.
  TITLE    Direct Submission
  JOURNAL  Submitted (10-FEB-2023) Biology, San Francisco State University,
            1600 Holloway Ave, San Francisco, CA 94132, USA
COMMENT    ##Genome-Assembly-Data-START##
            Assembly Date      :: JUN-2019
            Assembly Method    :: FLYE v. 06-2019
            Genome Representation :: Full
            Expected Final Version :: Yes
            Genome Coverage    :: 100.0x
            Sequencing Technology :: Illumina HiSeq; PacBio Sequel
            ##Genome-Assembly-Data-END##
FEATURES   Location/Qualifiers

```

```

source      1..38835
             /organism="Wolbachia pipientis"
             /mol_type="genomic DNA"
             /submitter_seqid="contig_33092"
             /isolate="wEsol"
             /isolation_source="galls on Solidago altissima"
             /host="Eurosta solidaginis MN-2018-EFC"
             /db_xref="taxon:955"
             /environmental_sample
             /country="USA: Cowling Arboretum, Carleton College,
             Northfield, MN"
             /lat_lon="44.48 N 93.13 W"
             /altitude="280 m"
             /collection_date="2018-11"
             /metagenome_source="insect metagenome"
             /note="metagenomic"
gene        complement(<..211)
             /locus_tag="wEsol_00445"
CDS         complement(<1..211)
             /locus_tag="wEsol_00445"
             /codon_start=1
             /transl_table=11
             /product="hypothetical protein"
             /pfam="Ribosomal_L1"
             /tigr="TIGR01169 rplA_bact 227 ribosomal protein L1"
             /translation="MNTYNGNPKQCLEKIVESASAKFNESVDVAVNLGVDSCKSEEQV
             RGTVVLPKGIGKNIKVAVFAQDKHLL"
             /cog="RplA COG0081 228 Ribosomal protein L1"
             /besthit="qcoverage 100 , hcoverage 32.258064516129 ,
             similarity 100 , identity 100 , evalue 2.17e-40 ,
             alnlength 70 , Bacteria , Proteobacteria , WP_209452367.1
             50S ribosomal protein L1 [Wolbachia endosymbiont of
             Ceratosolen solmsi]"
gene        complement(216..656)
             /locus_tag="wEsol_00446"
CDS         complement(216..656)
             /locus_tag="wEsol_00446"
             /codon_start=1
             /transl_table=11
             /fullproduct="qcoverage 100 , hcoverage 100 , similarity
             100 , identity 100 , evalue 6.05e-95 , alnlength 146 ,
             Bacteria , Proteobacteria , WP_015588765.1 MULTISPECIES:
             50S ribosomal protein L11 [unclassified Wolbachia]"
             /cog="RplK COG0080 141 Ribosomal protein L11"
             /pfam="Ribosomal_L11_N Ribosomal_L11"
             /tigr="TIGR01632 L11_bact 140 ribosomal protein L11"
             /product="50S ribosomal
             protein L11"
             /translation="MSVVVAKINLLMEAGKAVPGPKIASVLGPRGIPVPKFCEAFNKV
             TSAANANYKVGDLVTVRISIKDDRSHTFTVSGPPVAYLLKQEAKLKSGSGNPGKELVA
             KLPMsAIKVAKCKMVDKVDNEDSAVKMVGTAksMGIEVVEG"
             /besthit="qcoverage 100 , hcoverage 100 , similarity 100
             , identity 100 , evalue 6.05e-95 , alnlength 146 ,
             Bacteria , Proteobacteria , WP_015588765.1 MULTISPECIES:
             50S ribosomal protein L11 [unclassified Wolbachia]"
gene        complement(659..1495)
             /locus_tag="wEsol_00447"
CDS         complement(659..1495)
             /locus_tag="wEsol_00447"
             /codon_start=1

```

```

/transl_table=11
/pfam="NusG NusG KOW"
/fullproduct="qcoverage 100 , hcoverage 100 , similarity
100 , identity 99.6 , evalue 7.91e-206 , alnlength 278 ,
Bacteria , Proteobacteria , WP_015588764.1 MULTISPECIES:
transcription termination/antitermination protein NusG
[unclassified Wolbachia]"
/translation="MECEYKWYIIKVDYGYEQNIRELVSNNAVYFKEVFIPYQTVCSNK
SDIKELCEVYVYMHLCDESKNILNQTPGFCSGESGDFEMISDDEISLKCKEFNRYKWY
ILRVASNCEEKVRQHILENSMRLGVNDYFKEVFIPYEELSEIELKSKKIATRRKCFPG
YVFLYVNLCDVLFNFINNIPKSLKVYGFLLKNGNIPKVILDDEIHSMCNALYNAQETKK
LGYGYEKGEKVKINDGLFQNFRTGKVNMMVNDERKIIINVEVSILGKPTIIFDLAQVEKI
ED"
/product="transcription
termination/antitermination protein NusG"
/besthit="qcoverage 100 , hcoverage 100 , similarity 100
, identity 99.6 , evalue 7.91e-206 , alnlength 278 ,
Bacteria , Proteobacteria , WP_015588764.1 MULTISPECIES:
transcription termination/antitermination protein NusG
[unclassified Wolbachia]"
gene complement(1791..2963)
/locus_tag="wEsol_00448"
CDS complement(1791..2963)
/locus_tag="wEsol_00448"
/codon_start=1
/transl_table=11
/fullproduct="qcoverage 100 , hcoverage 100 , similarity
100 , identity 99.7 , evalue 1.77e-279 , alnlength 390 ,
Bacteria , Proteobacteria , WP_141456826.1 elongation
factor Tu [Wolbachia endosymbiont of Carposina sasakii]"
/cog="TufB COG0050 394 GTPases - translation elongation
factors"
/pfam="GTP_EFTU MMR_HSR1 Miro GTP_EFTU_D2 GTP_EFTU_D3"
/tigr="TIGR00485 EF-Tu 394 translation elongation factor
Tu"
/product="elongation factor Tu"
/translation="MTAIVEAFGKPHVNVGTIGHVDHGKTTTLTAAITKHYGNFVAYDQ
IDKAPEERKRGITIATAHVEYQTEKRHYAHVDCPGHADYVKNMIVGAAQMDAAILVVS
GVDGPMPTREHILLAKQVGVGIVVYINKADVADTDMIDLVEVRELLSKYGFPGD
EVPVVVGSALKALEDDSSSEYGKKSIDKLMEKLDEYVAVPPRPVDLPFLPIEDVFSIS
GRGTVVTGRIEKGEEKTGEEIEIIGLKATQKTICTGVEMFKKLLDKGSAGLNVGILLR
GTKREEVERGQVLAKPGTITPHRKFKAEVYILKKEEGGRHTPFFANYQPQFYLRRTDV
TGSIKLLDGKEMVMPGDNVSVLEVELQVPIAMDKGLRFAIREGGRTVGSVGVSEILE"
/besthit="qcoverage 100 , hcoverage 100 , similarity 100
, identity 99.7 , evalue 1.77e-279 , alnlength 390 ,
Bacteria , Proteobacteria , WP_141456826.1 elongation
factor Tu [Wolbachia endosymbiont of Carposina sasakii]"
gene complement(2975..5050)
/locus_tag="wEsol_00449"
CDS complement(2975..5050)
/locus_tag="wEsol_00449"
/codon_start=1
/transl_table=11
/fullproduct="qcoverage 100 , hcoverage 100 , similarity
100 , identity 100 , evalue 0.0 , alnlength 691 ,
Bacteria , Proteobacteria , WP_141456828.1 MULTISPECIES:
elongation factor G [unclassified Wolbachia]"
/cog="FusA COG0480 697 Translation elongation factors
(GTPases)"
/pfam="GTP_EFTU MMR_HSR1 GTP_EFTU_D2 EFG_IV EFG_C"

```

```

/tigr="TIGR00484 EF-G 691 translation elongation factor
G"
/product="elongation factor
G"
/translation="MEIGISKYRNIGIMAHIDAGKTTTTTERILFYTGKQNRIGEVHDG
AASMDWMEQEKERGITITSAATTCFVNDHRVNIIDTPGHVDFTIEVERSLRVLDGAVA
VFDGVAGVEPQSETVVRQADKYSVPRICFVNKMDRIGANFYRCVDMIKTKLGAAPLVI
HLPISGEKDFKGIIDLISMKAIIWQEETLGAKFSYEDIPSDLLDKAQEYRNLLDAAA
EMDDEAMNTYFESNDLPVDLLKKCVRNGTIKGKFVPVLCGSAFKNKGVPPLLDGVVDF
LPSPIDVDVIVGIDPKDSEKKIEVKPSEKEKFVALAFKVMTDKFFVGS�TFIRIYSGKL
KSKSTVSNALKNETEGIGRMLLMHANNREDITEARAGDIVALVGLKKTGDTLCSVD
FPILLERMEFPEPVIEIAVEPKTTSDEKLGIALNRLVAEDPSLRMSVNAESGQTILK
GMGELHLEIIVDRMKREFNVEANVGAPQVAYRETITKSVEIDYIHKKQSGGAGQFAKV
KIKFEPLPESGSGFQFESKIVGGAIPKEYIPGVENGLELIKEGGVISGFPLIDFKATLL
DGAFHEVDSSPLAFELAAGAFKEMANKAGPKMLEPIMKVEIITPEEYMGDVMGDINS
RRGNVADMLDLGNNSKIITASVPLANMFGYINVLRSMSQGRAQYSMHFSCYEQVPQYV
VDELKLEYN"
/besthit="qcoverage 100 , hcoverage 100 , similarity 100
, identity 100 , evalue 0.0 , alnlength 691 , Bacteria ,
Proteobacteria , WP_141456828.1 MULTISPECIES: elongation
factor G [unclassified Wolbachia]"
gene complement(5072..5551)
/locus_tag="wEsol_00450"
CDS complement(5072..5551)
/locus_tag="wEsol_00450"
/codon_start=1
/transl_table=11
/fullproduct="qcoverage 100 , hcoverage 100 , similarity
100 , identity 100 , evalue 1.39e-104 , alnlength 159 ,
Bacteria , Proteobacteria , WP_007549313.1 MULTISPECIES:
30S ribosomal protein S7 [Wolbachia]"
/cog="RpsG COG0049 148 Ribosomal protein S7"
/pfam="Ribosomal_S7"
/tigr="TIGR01029 rpsG_bact 154 ribosomal protein S7"
/product="30S ribosomal
protein S7"
/translation="MARRNKAKKREISPDSRYGSVLLMRFINITIMKCGKKSTAEEKIY
DALSLAEKKIGEGGLSIFETAVGNVTPSIEVRSRRIGGATYQVPVEVRQDRAVSLALR
WIAKATSAARKKSGKTTVDCLQSEILDAYNKRGGAFKMCEEKYKMAEANKAFSHLRF"
/besthit="qcoverage 100 , hcoverage 100 , similarity 100
, identity 100 , evalue 1.39e-104 , alnlength 159 ,
Bacteria , Proteobacteria , WP_007549313.1 MULTISPECIES:
30S ribosomal protein S7 [Wolbachia]"
gene complement(5557..5931)
/locus_tag="wEsol_00451"
CDS complement(5557..5931)
/locus_tag="wEsol_00451"
/codon_start=1
/transl_table=11
/fullproduct="qcoverage 100 , hcoverage 100 , similarity
100 , identity 100 , evalue 8.87e-82 , alnlength 124 ,
Bacteria;Eukaryota , Proteobacteria;Arthropoda ,
WP_006279787.1 MULTISPECIES: 30S ribosomal protein S12
[Wolbachia]"
/cog="RpsL COG0048 129 Ribosomal protein S12"
/pfam="Ribosomal_S12"
/tigr="TIGR00981 rpsL_bact 124 ribosomal protein S12"
/product="30S ribosomal
protein S12"
/translation="MPTINQLIRKGRGLGLTHKKKVPALGESNPQRRGVCTKVYTTTPR

```

```

KPNLSALRKVARVKISGYGEVTAYIPGEGHNLQEHSSVVLIRGGRVKDLPGVRYHIIRGA
LDLRGVQNRKKARSKYGVKKSG"
/besthit="qcoverage 100 , hcoverage 100 , similarity 100
, identity 100 , evalue 8.87e-82 , alnlength 124 ,
Bacteria;Eukaryota , Proteobacteria;Arthropoda ,
WP_006279787.1 MULTISPECIES: 30S ribosomal protein S12
[Wolbachia]"
gene 7046..7885
/locus_tag="wEsol_00452"
CDS 7046..7885
/locus_tag="wEsol_00452"
/codon_start=1
/transl_table=11
/fullproduct="qcoverage 100 , hcoverage 100 , similarity
100 , identity 100 , evalue 2.75e-202 , alnlength 279 ,
Bacteria , Proteobacteria , WP_010962305.1 MULTISPECIES:
peptide chain release factor N(5)-glutamine
methyltransferase [Wolbachia]"
/cog="HemK COG2890 280 Methylase of polypeptide chain
release factors"
/pfam="MTS Methyltransf_31 Methyltransf_26
Methyltransf_18 CMAS Eco57I"
/tigr="TIGR03534 RF_mod_PrmC 253 protein-(glutamine-N5)
methyltransferase, release factor-specific"
/product="peptide chain
release factor N(5)-glutamine methyltransferase"
/translation="MKTISTLIQEGSELLSSHKVESPHLDCEIIMQHVLGVERSFIIV
NHADQVPMKEKELLFWKLTKKRAERYPISQIIGNREFWSKNFIVNQHVLDPRPDSETII
LAVLKYYPNKKQKLKIADFGTGTGCLLISVLSEYEYAVGVGFEEKSLEAYKVAYQNTKK
HDLLSRAKIFPSSWTECRGSFDLIISNPPYIKRSKLKDLQAEVQKEPRIALDGGIDGL
SCYLSIFPILRKCLKKNGFAILEIGEDQSNIDKIIPSYELAFQEYVYDLAGMKRCIVV
KRT"
/besthit="qcoverage 100 , hcoverage 100 , similarity 100
, identity 100 , evalue 2.75e-202 , alnlength 279 ,
Bacteria , Proteobacteria , WP_010962305.1 MULTISPECIES:
peptide chain release factor N(5)-glutamine
methyltransferase [Wolbachia]"
gene complement(8050..8649)
/locus_tag="wEsol_00453"
CDS complement(8050..8649)
/locus_tag="wEsol_00453"
/codon_start=1
/transl_table=11
/product="hypothetical protein"
/pfam="Surface_Ag_2 OMP_b-brl"
/translation="MWHLVTQGE LGNNSYRAELEGMYSSVKVDNIGLTSSQITVSYLK
ETGEDPNKETYLISA AVSHDQIENISVMANVYHHWKSDFSFSPYVGIGIGATRMTMF
EKPSIRPAGQLKAGFDYRINEDVNMHIGYRGFGAIGSDIKLTAKRLGQVDDPNNDKK
KKLNPSSGSKVTEEINIGNQLFHTHGIEAGLTFHFASKA"
/besthit="qcoverage 96.4824120603015 , hcoverage
71.6417910447761 , similarity 100 , identity 100 , evalue
1.59e-134 , alnlength 192 , Bacteria , Proteobacteria ,
WP_209452369.1 P44/Msp2 family outer membrane protein
[Wolbachia endosymbiont of Ceratosolen solmsi]"
gene complement(8615..8833)
/locus_tag="wEsol_00454"
CDS complement(8615..8833)
/locus_tag="wEsol_00454"
/codon_start=1
/transl_table=11

```

```

/product="hypothetical protein"
/translation="MKQKGFTLVVGYYGQYLNNTSVLKTSTTGIKNLSINDRGAQNTG
GQSLSEYKGDYNPPFAANVAFGYTGRIG"
/besthit="qcoverage 95.83333333333333 , hcoverage
24.7311827956989 , similarity 92.8 , identity 89.9 ,
evaluate 2.16e-34 , alnlength 69 , Bacteria ,
Proteobacteria , WP_151807687.1 P44/Msp2 family outer
membrane protein [Wolbachia endosymbiont of Nasonia
oneida]"
gene complement(8778..8900)
/locus_tag="wEsol_00455"
CDS complement(8778..8900)
/locus_tag="wEsol_00455"
/codon_start=1
/transl_table=11
/product="hypothetical protein"
/translation="MISKKTLAVTAFALLSQQSFASETEGFYFGSRVLSIFK"
/besthit="qcoverage 82.5 , hcoverage 11.7021276595745 ,
similarity 100 , identity 100 , evaluate 1.85e-10 ,
alnlength 33 , Bacteria , Proteobacteria , WP_141456832.1
MULTISPECIES: P44/Msp2 family outer membrane protein
[unclassified Wolbachia]"
gene complement(9022..11019)
/locus_tag="wEsol_00456"
CDS complement(9022..11019)
/locus_tag="wEsol_00456"
/codon_start=1
/transl_table=11
/fullproduct="qcoverage 93.8345864661654 , hcoverage
93.5532233883059 , similarity 100 , identity 100 , evaluate
0.0 , alnlength 624 , Bacteria , Proteobacteria ,
WP_077188467.1 MULTISPECIES: type IV secretory system
conjugative DNA transfer family protein [Wolbachia]"
/cog="VirD4 COG3505 596 Type IV secretory pathway, VirD4
components"
/pfam="T4SS-DNA_transf TrwB_AAD_bind AAA_10 TraG-D_C"
/product="type IV secretory
system conjugative DNA transfer family protein"
/translation="MSNGNHLRNILIGGVVAFSVLEFCFYLSGILFVLFADGPDAVDF
KAINPSLTPFPQALWPTIFDHIQYCWHHPELYSLELKITLISSALPIIVLMIILWNL
RERIIIEWRPFKKKESLHGDSQWASEKDIRKAGLSKKGLLLGKDKRGYFISDGFQHAL
LFAPTGSGKGVGFVIPNLLFWTDSVIVHDIKLENYEITSGWRERQGGQKVYVWNPAQPD
GISHCYNPLQWISEKPGQMVDVQKIANLIMPEQDFWQNEARSLFVGVVLYLLAAPEK
VKSFGFVVRTMRSDDVVYNLAVALDTMGKILHPVAYMNIAAFLQKADKERSGVVSTMN
SSLELWANPLIDTATASSDFNILDFFKKKITVYVGLTPDNLRLRPLMQVFYQQATEF
LCRKLPSDDEPYGVLFMLDEFPTLGKMEQFQTGIAYFRGYRVRLFLIVQDTEQLKGIY
EEAGMNSFLSNSTYRITFAANNIETANLISQLIGNKTVQQESLNKPKFLDLNPASRSL
HISEIQRALLLPQEVIMLPRDDQIILIESTYPIKSKKILYSDTTFTTRLLKQTRVPT
QEPYDPNKVLSAAASKDKVNNEGNNVLEGPNSVDYPAETKTEDAVYDESDEFADDEDID
DEDIDDKFEDDDEDEDRSDDGFDDEEEENLKMRLKNDEK"
/besthit="qcoverage 93.8345864661654 , hcoverage
93.5532233883059 , similarity 100 , identity 100 , evaluate
0.0 , alnlength 624 , Bacteria , Proteobacteria ,
WP_077188467.1 MULTISPECIES: type IV secretory system
conjugative DNA transfer family protein [Wolbachia]"
gene complement(11050..12042)
/locus_tag="wEsol_00457"
CDS complement(11050..12042)
/locus_tag="wEsol_00457"
/codon_start=1

```

```

/transl_table=11
/fullproduct="qcoverage 100 , hcoverage 100 , similarity
100 , identity 100 , evaluate 8.10e-232 , alnlength 330 ,
Bacteria , Proteobacteria , WP_141456834.1 MULTISPECIES:
P-type DNA transfer ATPase VirB11 [unclassified
Wolbachia]"
/cog="VirB11 COG0630 312 Type IV secretory pathway,
VirB11 components, and related ATPases involved in
archaeal flagella biosynthesis"
/pfam="T2SE"
/tigr="TIGR02788 VirB11 308 P-type DNA transfer ATPase
VirB11"
/product="P-type DNA
transfer ATPase VirB11"
/translation="MNYAALDTYPEPLQGIFQEEGVNEISINKPKEVWIENRGEVRCE
KLEIFDLNHLKSLGRLIAQATEQKLSEEAPLLSATLPNGYRIQIVFPPACEPDKVMS
IRKPSSMQLALDDYEKMGAFSETVTEATDNPVDRHLDLLLQKKIKEFLEYAVISKKN
IIISGGTSTGKTTFTNATLRAIPDEERIITVEDAREIVLNDHPNKHVLIASKGGQGRA
KVTTQDLIEACLRLRPDRIIVGELRGAEAFSFLRAINTGHPGSISTLHADSPMTALEQ
IKLMVMQANLGIPPDQIIPYIRNVIDIVIQKRTGGGKRSISEILFTRSASENA"
/besthit="qcoverage 100 , hcoverage 100 , similarity 100
, identity 100 , evaluate 8.10e-232 , alnlength 330 ,
Bacteria , Proteobacteria , WP_141456834.1 MULTISPECIES:
P-type DNA transfer ATPase VirB11 [unclassified
Wolbachia]"
gene complement(12044..13540)
/locus_tag="wEsol_00458"
CDS complement(12044..13540)
/locus_tag="wEsol_00458"
/codon_start=1
/transl_table=11
/pfam="Pfam-B_130 TrbI TrbI"
/fullproduct="qcoverage 100 , hcoverage 100 , similarity
100 , identity 100 , evaluate 0.0 , alnlength 498 ,
Bacteria , Proteobacteria , WP_015588759.1 MULTISPECIES:
TrbI/VirB10 family protein [unclassified Wolbachia]"
/translation="MNKERRNNESEDESEIENKVVTVGSNQGHRAIMVILVLLGVVY
YFYFSPSHKEDSEVIKKEETKQNVQEFKGKLEQVPDNVIVPERIITDSLPLPLPTP
QIVPEIKQIKKEEEKPKETPVSNIPILPKPNFPSSNVISNLPTSFPPTIGGGGYPRDRR
SAQMLTISGSSGENKAADAILSDTSAQSSKATRVGKLGLMITQGKIIDAVLETAINSD
LQGMLRAMVSRDVYAETGDTVLPKGSRLIGSYSFDSNVAKSRVNINWNRVILPHGID
VAISSLSTDELGRAGIAGIVDNKIVSALFSSVALAGVSISSAVIGQKASNLIDALTAM
DAVKSITATEIDISSLKGAIVERLEDAIKTEVGKVGDEKWKLGRLAIEKIRNAKSDQD
LLRIIKEEIVSVIKSSGASGVDAITSDNIGITLDDVRQLLRQTQKRKSKSVYDEAIGKS
INDFSKDMRDIVGRYTDKKPTIYVDQGTALKVFVNQDIVFPPQAILNQ"
/product="TrbI/VirB10 family
protein"
/besthit="qcoverage 100 , hcoverage 100 , similarity 100
, identity 100 , evaluate 0.0 , alnlength 498 , Bacteria ,
Proteobacteria , WP_015588759.1 MULTISPECIES: TrbI/VirB10
family protein [unclassified Wolbachia]"
gene complement(13557..14357)
/locus_tag="wEsol_00459"
CDS complement(13557..14357)
/locus_tag="wEsol_00459"
/codon_start=1
/transl_table=11
/fullproduct="qcoverage 100 , hcoverage 100 , similarity
100 , identity 100 , evaluate 5.28e-189 , alnlength 266 ,
Bacteria , Proteobacteria , AGJ99506.1 Type IV secretion

```

```

system protein VirB9 [Wolbachia endosymbiont of
Drosophila simulans wHa]"
/cog="VirB9 COG3504 265 Type IV secretory pathway, VirB9
components"
/pfam="CagX"
/tigr="TIGR02781 VirB9 248 P-type conjugative transfer
protein VirB9"
/product="Type IV secretion system protein
VirB9"
/translation="MNMRYRILLVLVLLVSSNLNASINYNEPISVDSRIKTFVYSPNEV
FTVVFSQGYYSIEFAEGEKVKNIAGVDASSWKINPYDNKLLIMPFEVSSRTNMIITT
TKKRNYYIFDLISRPNYDKYLDTNAAKKVDHDYSAEKDISYVVRFFYPQEEGEFVDVLDE
VSLPTQMQYTTDKLEKIIQENDTKYNYTYIDEGGNADIVPIELFDDGYLTYLKFRNNN
KIPQIFVEGEDKPKRLLFDDYVVIKGVHKKLFMRVEDDEVEIINRSL"
/besthit="qcoverage 100 , hcoverage 100 , similarity 100
, identity 100 , eval 5.28e-189 , alnlength 266 ,
Bacteria , Proteobacteria , AGJ99506.1 Type IV secretion
system protein VirB9 [Wolbachia endosymbiont of
Drosophila simulans wHa]"
gene complement(14344..15024)
/locus_tag="wEsol_00460"
CDS complement(14344..15024)
/locus_tag="wEsol_00460"
/codon_start=1
/transl_table=11
/fullproduct="qcoverage 100 , hcoverage 100 , similarity
100 , identity 100 , eval 2.22e-152 , alnlength 226 ,
Bacteria , Proteobacteria , WP_015588757.1 MULTISPECIES:
type IV secretion system protein [unclassified
Wolbachia]"
/cog="VirB8 COG3736 239 Type IV secretory pathway,
component VirB8"
/pfam="VirB8"
/product="type IV secretion
system protein"
/translation="MLRFFKREKSTESLDKDINWNSNRYSTVIAQRNILLFALILLA
TISISILVIFKISTSSSTIEPFVIEIDKKSIVQLVDPVTVKQYSADEALNDYFISEYI
KAREVFDPYHYNNYYTKVRLFSSSNVYNEFRNYIGSQNMDDLNLYSDTKNEFKIRS
IQKLGNDALQVRFFVEFIRKDGSSSTRKNKIVIMSYRYASLEMNDQQRVYNPLGFQVIS
YRVDDEYV"
/besthit="qcoverage 100 , hcoverage 100 , similarity 100
, identity 100 , eval 2.22e-152 , alnlength 226 ,
Bacteria , Proteobacteria , WP_015588757.1 MULTISPECIES:
type IV secretion system protein [unclassified
Wolbachia]"
gene complement(15097..16179)
/locus_tag="wEsol_00461"
CDS complement(15097..16179)
/locus_tag="wEsol_00461"
/codon_start=1
/transl_table=11
/pfam="Pfam-B_9688 DHBP_synthase GTP_cyclohydro2"
/fullproduct="qcoverage 100 , hcoverage 100 , similarity
100 , identity 100 , eval 9.15e-260 , alnlength 360 ,
Bacteria , Proteobacteria , WP_015588756.1 MULTISPECIES:
GTP cyclohydrolase II [unclassified Wolbachia]"
/translation="MFIGNQSSNKVERAISEIRRGPIVIYDESNYLLFAAAEALERD
LFNQYKLTSSNVYVTLTSSKVKYISQNEHNSKRLLVNNFDELLYLINCSKEDCIKEL
QCSKTIDECAIALLKFSSELLPYALVADMTFENNHEMRNWCEKNDVIALDTSFINNFQE
NQDVYEVCKTSLFLKQTQEVNIIISYRTESGGREHHAIIGNPDKDDEPLVRIHSSCYT

```

```

GDL LDSLSCDCRSQLHQAIQMIADFGSGIILYLMQDGRGIGLTNKLRAYSMQREHNLD
TVDANRILGFEDDERSFVVAAMKLKLNINKIQLLTNNDRLSELESSGIEVTKCLPL
IVERNKYND SYMETKFGKLGHKLRVF"
/product="GTP cyclohydrolase
II"
/besthit="qcoverage 100 , hcoverage 100 , similarity 100
, identity 100 , evaluate 9.15e-260 , alnlength 360 ,
Bacteria , Proteobacteria , WP_015588756.1 MULTISPECIES:
GTP cyclohydrolase II [unclassified Wolbachia]"
gene 16487..17761
/locus_tag="wEsol_00462"
CDS 16487..17761
/locus_tag="wEsol_00462"
/codon_start=1
/transl_table=11
/pfam="Metallophos Metallophos_2"
/fullproduct="qcoverage 100 , hcoverage 100 , similarity
100 , identity 100 , evaluate 0.0 , alnlength 424 ,
Bacteria , Proteobacteria , WP_015588755.1 MULTISPECIES:
metallophosphoesterase [unclassified Wolbachia]"
/translation="MNIANIFIFLALSLITSFHFVHAQILYTWSQVIPENKLSIRAIT
DNDMCPIVYVDGEETEMLRSSINNGDHNETVCELTVQTSAKNISIEENLRVPILPKKV
NKIAFIGDTGCRINMLFQQECNSVDSWPLKKNLDSIALHKPDLIHVGDYHYRQTKCR
NTKKCGDIYGYNKEVWYADWFEPAKDILSQSPFLFVRGNHESCDRAYEGWFRYLDSP
FSSEKCGNFVSSWSDAGPMKFFIFDSSSGEDIFTTQSTIDAFERQFDKLIQNSSDKP
MWFLTHKPLWRSPKKEFLTLKSHGNLTQIEAFGDKFPSNVTTIVSGHIHIAQILLMDN
VPDQIIVGNGGASLHAQDQESVYQNVEFDYLNKGNYLAHEVRNFFGFGFAILNLDDHE
FTFYNQHNKEMYSAKLTEDFKLKRIKTIVDSF"
/product="
metallophosphoesterase"
/besthit="qcoverage 100 , hcoverage 100 , similarity 100
, identity 100 , evaluate 0.0 , alnlength 424 , Bacteria ,
Proteobacteria , WP_015588755.1 MULTISPECIES:
metallophosphoesterase [unclassified Wolbachia]"
gene complement(17789..19171)
/locus_tag="wEsol_00463"
CDS complement(17789..19171)
/locus_tag="wEsol_00463"
/codon_start=1
/transl_table=11
/fullproduct="qcoverage 100 , hcoverage 99.1379310344828
, similarity 100 , identity 100 , evaluate 0.0 , alnlength
460 , Bacteria , Proteobacteria , EAL59173.1 chromosomal
replication initiator protein DnaA [Wolbachia
endosymbiont of Drosophila ananassae]"
/cog="DnaA COG0593 408 ATPase involved in DNA replication
initiation"
/pfam="DnaA_N Kinesin Bac_DnaA AAA_14 IstB_IS21
AFG1_ATPase AAA_25 AAA Bac_DnaA_C"
/tigr="TIGR00362 DnaA 437 chromosomal replication
initiator protein DnaA"
/product="chromosomal replication initiator
protein DnaA"
/translation="MNLTS PKVSTMFFDQIITVTDHNV TW EKIQNCLYNLYGEATYNS
WLSSLKFVSSRNGEVLLSVSTRFIKEWITVHYMKKILSLWQSEDKSIRSIDIQVIEER
NSNFNVILKNREESNHNLGSPDPRFTFDNFVVGKPNELAFTAAKRVAESIDPILGSN
PLFLYGGVGLGKTHLMHAIAWHIVNSPSAKRKVVYLSAEKFMYYITALRSKDIMLFK
EQFRSVDVLMVDDVQFISGKDSTQEEFFHTFNALIDQNKQLVISADRSPSDDLGDVEER
IKSRLGWGLVADINETTFELRLGILQAKVEQMNMYPKDVLEFLARNIKSNIRELEGA
LNKVTHTSLIGRSM TVESASETLIDLLRSNHRSVTIEEIQKKVAEFFNIKVADMQSNR

```

```

RLRSLARPRQIAMYFAKKFTQKSLPDIGRNFGRDHATVIHAVKQVENFIKTDSKFAD
EINRLKKMFK"
/besthit="qcoverage 100 , hcoverage 99.1379310344828 ,
similarity 100 , identity 100 , evaluate 0.0 , alnlength
460 , Bacteria , Proteobacteria , EAL59173.1 chromosomal
replication initiator protein DnaA [Wolbachia
endosymbiont of Drosophila ananassae]"
gene 19494..20231
/locus_tag="wEsol_00464"
CDS 19494..20231
/locus_tag="wEsol_00464"
/codon_start=1
/transl_table=11
/fullproduct="qcoverage 100 , hcoverage 100 , similarity
100 , identity 100 , evaluate 1.64e-177 , alnlength 245 ,
Bacteria , Proteobacteria , WP_015589514.1 MULTISPECIES:
glutamine synthetase [unclassified Wolbachia]"
/cog="GlnA COG0174 443 Glutamine synthetase"
/pfam="Gln-synt_C"
/tigr="TIGR00653 GlnA 462 glutamine synthetase, type I"
/product="glutamine
synthetase"
/translation="MIILSNLSCYAVLGIELEFYIEGIEKEYLFLNSIKNKIASLEFS
CEKENSTHQYEIKSGCYTNSYNLIKHFELAKQSLTETAQKLGGNVSFKAKPYLDRAGS
ALNVHVNLVNSNNGNLFYINEQKYSDYLIHSIGGLCMMKKHMLFFAPNDDSYLRFQY
PDIHTPTTISWGVNNRTAAIRIPYFGNDFKRCRLEHRVPGADCDLEKVLTAIEGMVF
GIENKIAPPNRVYGIASDPQYEMERLI"
/besthit="qcoverage 100 , hcoverage 100 , similarity 100
, identity 100 , evaluate 1.64e-177 , alnlength 245 ,
Bacteria , Proteobacteria , WP_015589514.1 MULTISPECIES:
glutamine synthetase [unclassified Wolbachia]"
gene complement(20235..20975)
/locus_tag="wEsol_00465"
CDS complement(20235..20975)
/locus_tag="wEsol_00465"
/codon_start=1
/transl_table=11
/pfam="Pfam-B_270"
/fullproduct="qcoverage 100 , hcoverage 100 , similarity
100 , identity 100 , evaluate 7.02e-159 , alnlength 246 ,
Bacteria , Proteobacteria , WP_015589513.1 MULTISPECIES:
hypothetical protein [unclassified Wolbachia]"
/translation="MVAILNITKGKNKVIIVSGLAGALSALIFLTAIHIAAKIAIIVSA
AAVTYLLLSLIHKIRTKKEQPEITGVSGEKVSEDEGYSSVDEGEEDTAKEPEKTETE
LEEEIIRKRAQERMEKGS LGGPINAFGEPIHVTIDAENSNPVDYTKTMVPEEIIILSM
LNDKTLTQNNSSSIKNQMKPLPEHMDVPGNPLPGQVLSNLELESKSTQKLSALDLLLQ
CKNVDNDVKMLKQPITQKGFNGLGFDR"
/product="hypothetical protein"
/besthit="qcoverage 100 , hcoverage 100 , similarity 100
, identity 100 , evaluate 7.02e-159 , alnlength 246 ,
Bacteria , Proteobacteria , WP_015589513.1 MULTISPECIES:
hypothetical protein [unclassified Wolbachia]"
gene 21151..22053
/locus_tag="wEsol_00466"
CDS 21151..22053
/locus_tag="wEsol_00466"
/codon_start=1
/transl_table=11
/product="hypothetical protein"
/pfam="ACR_tran"

```

```

/tigr="TIGR00915 2A0602 1050 RND transporter,
hydrophobe/amphiphile efflux-1 (HAE1) family"
/translation="MQSLLIERNRAVVLLLVIFIFGSYVYVKMPRESNPDIQIPIIS
VFVGLPGISAQDSEKLLVLP IENELRSIEGVRELRAFATNDGAHMILEFGTEYDNKEV
LDNVRSKLSNIKSKLPVEAESPIINEINLSLFPILNVGLIGNLPERSLTEIARKLKKE
IESLPNVLKVEVAGMRKETVEVIIIEPTVLTKYNIQSNEIFQAISSNNRLVGAGSLEND
TGKYSIKISGLLKDIEDIMNIPIRSQGDVLRIDIAKVYPRFEDHQGFARINGLPSV
VLEISKRNGKKHNRHSKSSKILNG"
/cog="AcrB COG0841 1009 Cation/multidrug efflux pump"
/besthit="qcoverage 95.33333333333333 , hcoverage
27.9296875 , similarity 100 , identity 100 , eval
3.49e-183 , alnlength 286 , Bacteria , Proteobacteria ,
WP_174516802.1 efflux RND transporter permease subunit
[Wolbachia endosymbiont of Cardiocondyla obscurior]"
gene 22046..24226
/locus_tag="wEsol_00467"
CDS 22046..24226
/locus_tag="wEsol_00467"
/codon_start=1
/transl_table=11
/product="hypothetical protein"
/pfam="ACR_tran"
/tigr="TIGR00915 2A0602 1050 RND transporter,
hydrophobe/amphiphile efflux-1 (HAE1) family"
/translation="MDKAKDQLPENLKVVLNDQSKNVRDVLDDLENGIIFAVLLILI
IMMLSMGTRIAILVALSIPGSFLIGIIALYFMGITLNIVVLFSLIMAVGMLVDDAIVI
SEYADRKMICGMGKVEAFHTSVRDMFYFVLSSTLTKLAVFFPLLLWPDTVGKFMQYIP
ITIILTTLTGSLIMALVFIPITLGAIFGKPSVTSKEEIEKMNAIESGEIKNAGPIIRAYV
RMLEKVLDDHPPKFVCATVFVLFVSFVLYFTFGPGVKFFPKVDSNIIISVKAKESLSA
KARDLILKEVEERILSIEKEIHVSYARSGAFSDNVIARIQLELMDWRFRRAKAKHILND
IRSSVQDMKGIIINVQEEKPGPSADKPIQINLSGSASSLNLAEEKILEIMNQPSGGFI
NIQDSRSAPETIEWNMSVDKNKATSSSEVSVATIGDFIKMVTNGVLIGKYRPNNNTDEEID
IVLRFPGKDRNMKTIDNLFINTVNGPYPM SNIVKYAPEKKVNKLNRIDGLRTVTISAD
VDTGYLVDERVKFIQNSIAQDWDKGVKIDFKGDKEDQQKSGAFLKAFILAITLMILV
LVTQFNNVYHTFIVMTAVFLSTTCVFFVFVFLIQQVFVVMCGVGIIALAGIIVNNNII
LLDAFHHQIKVHKNDIKRCVINAAISRVRPILLTVATTVLGLIPMITRLNINFFTLQI
TYDAPSSQWWVDISTTIASGILAAATVLTFFTPALLVIQKHEKT"
/cog="AcrB COG0841 1009 Cation/multidrug efflux pump"
/besthit="qcoverage 100 , hcoverage 70.8984375 ,
similarity 100 , identity 100 , eval 0.0 , alnlength
726 , Bacteria , Proteobacteria , WP_174516802.1 efflux
RND transporter permease subunit [Wolbachia endosymbiont
of Cardiocondyla obscurior]"
gene 24315..25877
/locus_tag="wEsol_00468"
CDS 24315..25877
/locus_tag="wEsol_00468"
/codon_start=1
/transl_table=11
/pfam="NusA_N S1 KH_5 KH_2 KH_4 KH_1 HHH_2"
/fullproduct="qcoverage 100 , hcoverage 100 , similarity
100 , identity 100 , eval 0.0 , alnlength 520 ,
Bacteria , Proteobacteria , WP_015589511.1 MULTISPECIES:
transcription termination factor NusA [unclassified
Wolbachia]"
/translation="MIANRKSSVKQKSNKNNIVGSLDVIKTAGELSLQKGLDFDVVIK
ALESATIEAVAHQKYGSKSKIVVDIDRNTGKVTSYRKLKVIDDESNEKENTECESITLT
QAKLIKGDAGVGDVSELLSLNTDLASARIAQQKIAQIIKDEESKKQYEEFKDKVGEI
RYGIVKQVEYSDLIIDINGTRAYLPLRNLTTGGESFREGDKVKAYIQTVKRSDDGRQII
LSRTHGEGFLEALLNQEIPEIADGLVTIKGIARDAGSRSKVAVFSPDKNIDPVGACVGV

```

```

KGDRIKTIHELNGEKIDVINYSDDLQGFVIKAITPAEVSKVIIDENENCIELIVAED
QLSLAIGKKGNVRLASELVGWKIEILSTQQESERRSKELSQCSALFAEALNLEEIMG
QLLVTEGFSSVEDISSASIKELASIEGFNEDIANELHNRANKYLKAENDRKIEELKSL
GMEDDVINLTLSIDNKIALSKHDIKTLEDIADLSSYEFCSILSSSSDSKEDLKDTVDS
IIIEARKKLGLI"
/product="transcription
termination factor NusA"
/besthit="qcoverage 100 , hcoverage 100 , similarity 100
, identity 100 , evaluate 0.0 , alnlength 520 , Bacteria ,
Proteobacteria , WP_015589511.1 MULTISPECIES:
transcription termination factor NusA [unclassified
Wolbachia]"
gene 25887..28211
/locus_tag="wEsol_00469"
CDS 25887..28211
/locus_tag="wEsol_00469"
/codon_start=1
/transl_table=11
/fullproduct="qcoverage 100 , hcoverage 100 , similarity
100 , identity 100 , evaluate 0.0 , alnlength 774 ,
Bacteria , Proteobacteria , WP_015589510.1 MULTISPECIES:
translation initiation factor IF-2 [unclassified
Wolbachia]"
/pfam="IF2_N SRPRB GTP_EFTU MMR_HSR1 PduV-EutP FeoB_N Ras
Arf Miro GTP_EFTU_D2 IF-2 GTP_EFTU_D2"
/tigr="TIGR00487 IF-2 587 translation initiation factor
IF-2"
/product="translation
initiation factor IF-2"
/translation="MNNEDISDKKLTQLGLSKLKLNLNLNSSASPSTGATVVKKRRKK
SHDAEEHNLFDSEKLGSLTEKEQIFRINAVQNAALLKERNQREEKEKTAKEDSNKEID
EKNEADALSKEINKQVLSNTHLVEPKEDSIDHEDNDKKSFKVKNKDIYSKHSKL VIAQA
IDEKTEQPPVFKQRFGIRGRKSKFTKGKNISREVIIPDKITIRELSIRMAEDSKSVLK
MFKEEVGESYRVDDLVDPDIACEIVEKFNHTAKRVSDTNREKDLFFIEGRESLPKKPK
PPIVTFMGHVDHGKTSLLDAFRESNVAERESGGITQHIGAYQIITKDKQKITFIDTPG
HEAFTAMRACGANITNIVVIVVAADDGIMKQTVEAINHAKAANVSIIVAINKIDKSEP
GDVEKVMSSLPQYDLIPEELGGDVMIVPVSAKKKTNLDKLEETILLIAELMKLEAIED
CRALGWVIESKIDKAKGISATLIVEEGLTKVGDILVVGTTYSKVRSMVNHLGQREKAA
LPSAPIEITGLNGVPNAGDKFVVVNSEKQAREIVEYRLELIKKKKEDLGDNNLDIFSR
NNSETEELSVVLKCDVTGSIEAIISSSIDKLGKDQVKLNILHKAVGGITDSVDLLAEAS
SAVILAFNVKVDISKIRDLAKQKGIEIHTYNIYELIDDMRMYLTMKLPVTREVRVGS
ASVRQIFNVSKAGNIIGCYVSDGVIKKDSLKVVVRGGKLVHEGKCLKAIRRFKDDVKEV
GVNFECGVSLEGNIDIKVGDILEAYQLVQEEERVL"
/besthit="qcoverage 100 , hcoverage 100 , similarity 100
, identity 100 , evaluate 0.0 , alnlength 774 , Bacteria ,
Proteobacteria , WP_015589510.1 MULTISPECIES: translation
initiation factor IF-2 [unclassified Wolbachia]"
gene 28221..28619
/locus_tag="wEsol_00470"
CDS 28221..28619
/locus_tag="wEsol_00470"
/codon_start=1
/transl_table=11
/fullproduct="qcoverage 100 , hcoverage 100 , similarity
100 , identity 100 , evaluate 1.27e-87 , alnlength 132 ,
Bacteria , Proteobacteria , WP_015589509.1 MULTISPECIES:
ribosome-binding factor A [unclassified Wolbachia]"
/cog="RbfA COG0858 118 Ribosome-binding factor A"
/pfam="RBFA"
/product="ribosome-binding

```

```

factor A"
/translation="MKKEIRNLKIASVLHRAISRILMEGKVFNKNVAVSDVKLSKDLK
KADVYIVLSSLNIQVADYLDPEKRRTGDPSENNCDLNTVVNEMNQSAWSIRKSILCYV
DLRFIPELVFKPDLAFDNFVNVSKILHNHT"
/besthit="qcoverage 100 , hcoverage 100 , similarity 100
, identity 100 , evalue 1.27e-87 , alnlength 132 ,
Bacteria , Proteobacteria , WP_015589509.1 MULTISPECIES:
ribosome-binding factor A [unclassified Wolbachia]"
gene 28623..29480
/locus_tag="wEsol_00471"
CDS 28623..29480
/locus_tag="wEsol_00471"
/codon_start=1
/transl_table=11
/fullproduct="qcoverage 100 , hcoverage 100 , similarity
100 , identity 100 , evalue 2.72e-196 , alnlength 285 ,
Bacteria , Proteobacteria , WP_015589508.1 MULTISPECIES:
4-hydroxybenzoate octaprenyltransferase [unclassified
Wolbachia]"
/cog="UbiA COG0382 289 4-hydroxybenzoate
polyprenyltransferase and related prenyltransferases"
/pfam="UbiA"
/tigr="TIGR01474 ubiA_proteo 282 4-hydroxybenzoate
polyprenyl transferase"
/product="4-hydroxybenzoate
octaprenyltransferase"
/translation="MHFNRYFSLMRLHSLTGLWLVLFPSSLGILLASTSLSYQVLFLL
VLFTIGAFLMRPAGCIINDIFDRKIDAHVERTKYRPLASGALNIKQALALLSLLLSID
LVILLLTNKTTLILGIISMCMIATYPLLKRYVWWPQLFLGFTFNMGSLMGSAAITNQI
SIESLLFYIGCVFWTLSYDTIYAHQDKKDDEKLGKSTALYFGDTTKSWLKRFYLISL
MTWLYAGILSSLNNIFYIALLA VGFI FHRQYKNFNPDDPSQCMSIFKNNSYVGLLLFF
GILLDRIIT"
/besthit="qcoverage 100 , hcoverage 100 , similarity 100
, identity 100 , evalue 2.72e-196 , alnlength 285 ,
Bacteria , Proteobacteria , WP_015589508.1 MULTISPECIES:
4-hydroxybenzoate octaprenyltransferase [unclassified
Wolbachia]"
gene complement(29799..29975)
/locus_tag="wEsol_00472"
CDS complement(29799..29975)
/locus_tag="wEsol_00472"
/codon_start=1
/transl_table=11
/fullproduct="qcoverage 100 , hcoverage 100 , similarity
100 , identity 100 , evalue 5.86e-32 , alnlength 58 ,
Bacteria , Proteobacteria , WP_179945710.1 MULTISPECIES:
hypothetical protein [Wolbachia]"
/translation="MKKKAKEALGLLSALKYWRFLCFKRLTSEIQPLLIATNLRCKCL
RNLLSRKKDKESPS"
/product="hypothetical protein"
/besthit="qcoverage 100 , hcoverage 100 , similarity 100
, identity 100 , evalue 5.86e-32 , alnlength 58 ,
Bacteria , Proteobacteria , WP_179945710.1 MULTISPECIES:
hypothetical protein [Wolbachia]"
gene complement(30266..31744)
/locus_tag="wEsol_00473"
CDS complement(30266..31744)
/locus_tag="wEsol_00473"
/codon_start=1
/transl_table=11

```

gene

CDS

```
/fullproduct="qcoverage 100 , hcoverage 100 , similarity
100 , identity 100 , evaluate 0.0 , alnlength 492 ,
Bacteria , Proteobacteria , WP_015589507.1 MULTISPECIES:
UbiD family decarboxylase [unclassified Wolbachia]"
/cog="UbiD COG0043 477 3-polyprenyl-4-hydroxybenzoate
decarboxylase and related decarboxylases"
/pfam="UbiD"
/tigr="TIGR00148 TIGR00148 438 UbiD family decarboxylase"
/product="UbiD family
decarboxylase"
/translation="MYNNLRDFIKALEEKKDLIRIKEEVSTVLEMTEIHRRVLSSKGP
AIIFENVITENGKNSIPVLVNLFGTIKRIALGLNINPDELRLDGLKLLAFLQSPEPPKN
FKDAIKMFPLLKVVLSMRSKVVSAPCQEVVLTGDEVDSLPIQTCWPNEPAPLITW
PIVVTKGPTKEKQDNFNLGIYRMQVIDKKTTLMRWLAQRGGATHHKRWKEKEQNMKFP
AAAVIGSDPATIIAAVTPVPETLSEYQFAGLLRKKPLELVNCRITPLQVPAHAEIVLE
GYVSLDRYQDEGPYGDHTGYYSVEQFPEFNITAITMRKNPIYLSTFTGKPPDEPSIL
GEALNEIFVPILINQFPEIVDFYLPPEGCSYRIAVVSIKSSYPGQAKRIVMGILSFLK
QFLYTKFIIVDDDDINIRDWKEVMWAMSTRMDPVRDTIMIENAPIDYLDFAESPESGLG
GKMGFDATNKIPPETKREWGKKIEMSEEIVRKVTEKWEEYMD"
/besthit="qcoverage 100 , hcoverage 100 , similarity 100
, identity 100 , evaluate 0.0 , alnlength 492 , Bacteria ,
Proteobacteria , WP_015589507.1 MULTISPECIES: UbiD family
decarboxylase [unclassified Wolbachia]"
complement(31832..32911)
/locus_tag="wEsol_00474"
complement(31832..32911)
/locus_tag="wEsol_00474"
/codon_start=1
/transl_table=11
/fullproduct="qcoverage 100 , hcoverage 100 , similarity
99.7 , identity 99.7 , evaluate 9.88e-259 , alnlength 359 ,
Bacteria , Proteobacteria , WP_141456842.1 MULTISPECIES:
Fic family protein [unclassified Wolbachia]"
/cog="COG3177 COG3177 348 Fic family protein"
/pfam="Fic Pfam-B_2040 Pfam-B_15630"
/product="Fic family
protein"
/translation="MPMPNYTITSKIANCLMRIEAAKEKVLHLPLTVSMLSSLRETAR
LYTTHYSTMIEGNRLPEPKQIEEVLSGKSHFPKYRRDENEVKGYYAALTQVEQWAARTI
PITEKAIQTLHALVMASGSKSVKPTSYRDGQNVIRDSRTRAIIMPPPEAKDVPKLMSS
MIDWIRDSEQVPCPIIAGIAHYQFVTIHPYYDGNGRTARLLTTLILHLGGYDLKGLYS
LEEYYAKNLGAYYEAISVGPSHNYYMGRAEADITKWVEYFVEGMANSFENVLQCINEE
EYHTDQTDLIRKLDPKQRKALELFQEFSAITASQVGELFNFKPR TSAQLCKKWVEMGF
IKIVDFSNRGRKYKLSKQYEDLISN"
/besthit="qcoverage 100 , hcoverage 100 , similarity 99.7
, identity 99.7 , evaluate 9.88e-259 , alnlength 359 ,
Bacteria , Proteobacteria , WP_141456842.1 MULTISPECIES:
Fic family protein [unclassified Wolbachia]"
complement(32922..33074)
/locus_tag="wEsol_00475"
complement(32922..33074)
/locus_tag="wEsol_00475"
/codon_start=1
/transl_table=11
/fullproduct="qcoverage 100 , hcoverage 100 , similarity
100 , identity 100 , evaluate 6.23e-26 , alnlength 50 ,
Bacteria , Proteobacteria , WP_007548541.1 MULTISPECIES:
hypothetical protein [Wolbachia]"
/translation="MSEPIIGREKEIAILQDKLLSQSAEFIAVYGRRRVNVVLSAFYQ
HNIEVM"
```

gene

CDS

```

        /product="hypothetical protein"
        /besthit="qcoverage 100 , hcoverage 100 , similarity 100
        , identity 100 , evalue 6.23e-26 , alnlength 50 ,
        Bacteria , Proteobacteria , WP_007548541.1 MULTISPECIES:
        hypothetical protein [Wolbachia]"
gene      33406..34164
        /locus_tag="wEsol_00476"
CDS       33406..34164
        /locus_tag="wEsol_00476"
        /codon_start=1
        /transl_table=11
        /fullproduct="qcoverage 100 , hcoverage 100 , similarity
        100 , identity 100 , evalue 1.56e-174 , alnlength 252 ,
        Bacteria , Proteobacteria , WP_015589505.1 MULTISPECIES:
        DsbA family protein [unclassified Wolbachia]"
        /cog="DsbG COG1651 244 Protein-disulfide isomerase"
        /pfam="Thioredoxin_4 Thioredoxin_2 DSBA"
        /product="DsbA family
        protein"
        /translation="MSRISFLLILILAVASLPVINNWLSHRGQTLTDDQISTRLLDDYI
        SRNFDKIVKTLKEESIKSSYAARDNATKGKILQYKNEIFDSAYPYSGNENSSVIAVGF
        FDYSCGYCKAMKNDIKQLINDGKIKYIFRDAPILGNDSLRAAKSALAVYFIDKEKYFD
        FHYSALSHKGGFSDESILDIVKSIGIDEDDFNDSIKDNADKIEQMINNSRLLVRDLGV
        GGTPFLIIGDSLFGATDLNILRKKVDELCHKQG"
        /besthit="qcoverage 100 , hcoverage 100 , similarity 100
        , identity 100 , evalue 1.56e-174 , alnlength 252 ,
        Bacteria , Proteobacteria , WP_015589505.1 MULTISPECIES:
        DsbA family protein [unclassified Wolbachia]"
gene      34385..35752
        /locus_tag="wEsol_00477"
CDS       34385..35752
        /locus_tag="wEsol_00477"
        /codon_start=1
        /transl_table=11
        /pfam="OTU Pfam-B_1737 Pfam-B_2162 IncA"
        /fullproduct="qcoverage 100 , hcoverage 100 , similarity
        99.8 , identity 99.6 , evalue 1.28e-245 , alnlength 455 ,
        Bacteria , Proteobacteria , WP_015589504.1 hypothetical
        protein [Wolbachia endosymbiont of Drosophila simulans]"
        /translation="MKEPNYTTREPIALFRQIKEKKKSSNLLHNLKSAYSCKKLKIGAAL
        KTGDCFFDSVAQGLNELKPGHRFTAKSLRKDCADYAENKKDSRWVFDEITKNIAEGYA
        VPMIGSNGNVMKDNQNNIIPDNIA SFDRYLKDIRSMATEVSLPIWGRPGIEGRMICDK
        YEVELDIYSIEEDSQKVTVTKITAHDDDLVFIQGVNLDQLKIDNSKKTGVGVNYMQH
        FVPLLSGISEDIKEDQQVSSEAILGTGKRVPTSDQSEKEVQQEIIINISTSATVYTDKE
        IPFSHQLEQKTRQEGINASASATVYTDREIPTSNDQSEKQVQQEIIINTNTSAPVLQIYT
        DKKIPSSHQQEQKTQQKEIQKKLINSYRKEAIYVIATVITAI AFTASAI AAIITQAIP
        FACLAGTALVAACVCVYQLTQSHKDINELKSELGKGQEDNAHTFLEKVGLKMHDLINK
        AISKV"
        /product="hypothetical protein"
        /besthit="qcoverage 100 , hcoverage 100 , similarity 99.8
        , identity 99.6 , evalue 1.28e-245 , alnlength 455 ,
        Bacteria , Proteobacteria , WP_015589504.1 hypothetical
        protein [Wolbachia endosymbiont of Drosophila simulans]"
gene      35806..36402
        /locus_tag="wEsol_00478"
CDS       35806..36402
        /locus_tag="wEsol_00478"
        /codon_start=1
        /transl_table=11
        /fullproduct="qcoverage 100 , hcoverage 100 , similarity

```

```

100 , identity 100 , evaluate 1.04e-143 , alnlength 198 ,
Bacteria , Proteobacteria , WP_141456846.1 MULTISPECIES:
TIGR02217 family protein [unclassified Wolbachia]"
/cog="COG5448 COG5448 184 Uncharacterized conserved
protein"
/pfam="DUF2460"
/tigr="TIGR02217 chp_TIGR02217 210 TIGR02217 family
protein"
/product="TIGR02217 family
protein"
/translation="MSFTEIRFPENISYGSAGGPEFSTDVVTTHNGCEQRNINWSHAR
TRYNIAYGVSNEQLLELITFFHARKGKAIGFRFKDWSDFIAINQEIGIGDNKKTTFQ
LIKTYVSGEDKHIRMIKKPVHGTVKIYLNKKEESEYSVNYSTGEITFMKPPVKDAIIT
ASFEFDVFPVRFDTDYLNASIDDYGSNSWNNIPLIEVKF"
/besthit="qcoverage 100 , hcoverage 100 , similarity 100
, identity 100 , evaluate 1.04e-143 , alnlength 198 ,
Bacteria , Proteobacteria , WP_141456846.1 MULTISPECIES:
TIGR02217 family protein [unclassified Wolbachia]"
gene complement(36533..37321)
/locus_tag="wEsol_00479"
CDS complement(36533..37321)
/locus_tag="wEsol_00479"
/codon_start=1
/transl_table=11
/fullproduct="qcoverage 100 , hcoverage 100 , similarity
100 , identity 100 , evaluate 6.62e-181 , alnlength 262 ,
Bacteria , Proteobacteria , WP_015589502.1 MULTISPECIES:
hypothetical protein [unclassified Wolbachia]"
/translation="MNTKIFEMLIRRTGLRRDSKAEIIQLNRNEKAFVDEDKKSIELA
EAIFFEENMFHFRKPGPAMDYILHKLINDRKLFEEMKDRGTSIIRLFSLLSMYHGRLN
CCVIRKGGCITECGILDYAGTYPELVPLEDFILIEPCSYLEYTVLDNDNIRNRLARDL
TEDKTKLDIFLNGILATKNSDLVLSCINKIEVLNEEDRYFVNRLQKNMMLDYILNKDD
TTLAKSTLKELLKLSILQEGESTKLESPQASSVNVSKAQQHCSI"
/product="hypothetical protein"
/besthit="qcoverage 100 , hcoverage 100 , similarity 100
, identity 100 , evaluate 6.62e-181 , alnlength 262 ,
Bacteria , Proteobacteria , WP_015589502.1 MULTISPECIES:
hypothetical protein [unclassified Wolbachia]"
gene complement(37565..>38835)
/locus_tag="wEsol_00480"
CDS complement(37565..>38835)
/locus_tag="wEsol_00480"
/codon_start=1
/transl_table=11
/product="hypothetical protein"
/pfam="Transket_pyr"
/tigr="TIGR00239 2oxo_dh_E1 931 oxoglutarate
dehydrogenase (succinyl-transferring), E1 component"
/translation="SAAYTPKKADWFGGVWSKLRRAKLNLDSEYYTDSGVPPDELKKL
GVHINSNIPSSFNINNKKVRKILDGRIDSINSGSNIDWATAESLAFASLLTEGIGVRLS
GQDSGRGTFSHRHSRLVDQVTEEAFIPLNNINEKQAHFEVIDSALSEYAVMGFEYGYS
LDSPYSVLVWEGQFGDFANGAQIMIDQFIASAETKWLRSSGLVLLLPHGYEGQGPEHS
SARIERFLQLCAEDNMQVVNCSTPANYFHVLRQMRDRFKPLVVFTPKSLLRHKRAV
SNLSDFEGKFLTVIPECRKGLVSSDKVRKVVICSGKVYYDIIEMLETQKINDIAVIRL
EQFYPPADKLSNELEKYKNAEIIWCQEEPKNMGGWFFVNPLIEEVLSNLDIQAKRPK
CIARPAASPACGYASVHAQQQEEILRQIA"
/cog="SucA COG0567 906 2-oxoglutarate dehydrogenase
complex, dehydrogenase (E1) component, and related
enzymes"
/besthit="qcoverage 100 , hcoverage 47.737556561086 ,

```

```

similarity 100 , identity 100 , evaluate 3.64e-304 ,
alnlength 422 , Bacteria , Proteobacteria ,
WP_187470087.1 2-oxoglutarate dehydrogenase E1 component
[Wolbachia endosymbiont of Drosophila sechellia]"
gene complement(16212..16296)
/locus_tag="wEsol_tRNA-04"
tRNA complement(16212..16296)
/locus_tag="wEsol_tRNA-04"
/gene="tRNA-Leu"
/intronpos="0..0"
/program="tRNAscan-SE"
/cove_score="57.8"
/evidence=predicted
/type="Leu"
/anticodon=GAG
/product="tRNA-Leu (GAG) "
gene complement(1705..1777)
/locus_tag="wEsol_tRNA-05"
tRNA complement(1705..1777)
/locus_tag="wEsol_tRNA-05"
/gene="tRNA-Trp"
/intronpos="0..0"
/program="tRNAscan-SE"
/cove_score="72.6"
/evidence=predicted
/type="Trp"
/anticodon=CCA
/product="tRNA-Trp (CCA) "

```

#### ORIGIN

```

1 ctaataaatg tttatcttga gcgaaaacag ctactttaat attcttcccg atacctttag
61 gcaaaactac tgtaccacgc acctgctctt cagattttaca tgaatctacg cctagattga
121 ccgcaacatc aactgattca ttaaattttg ctgaagcaga ctcaacaatc ttctccaaac
181 actgcttagg attaccatta tatgtattca tttacctaac cttccacaac ttctataccc
241 atagattttg cagtgcctac aaccattttc actgctgaat cttcattatc cactttcata
301 tcaaccatct tgcactttgc cactttaatt atagcagaca taggtaattt agccactaat
361 tctttaccag gattaccaga acctttactt aatttagctt cctgcttaag taaataagcc
421 acaggaggac cgctgacagt aaaatcatga gagcgatcat cctttatgga aattcgcact
481 gttactaaat cacctacttt ataattagcg ttagcagcgc tagtaacttt attaaaagct
541 tcacaaaact taggaacagc tataccacgc ggaccaagta ctgaagcaat ttttggtcct
601 ggaactgctt ttccagcttc cataagtaag ttaatcttag caactacaac actcataatt
661 aatcctctat tttctctact tgagccagat caagctctat tattgtcggc ttacctaaaa
721 tcgatacttc cacattaata atttttctct catcgtttac catattttacc ttaccagtaa
781 aattttgaaa aagaccatca ttaattttca ctttttcacc tttttcataa ccataaccta
841 acttctttgt ctcttgagca ttataaagtg cattacacat tgagtgaatc tcatcatcca
901 aaattacctt tggaatatta ccatttttca aaaatccata aaccttaaga gattttggta
961 tattattgat aaaattcaat acttcacgcg ataaattcac gtataaaaag acataaccag
1021 gaaagcattt ccttcgtgta gcaattttct tagattttta ctctatttca cttagctctt
1081 catatggaat aaaaacttcc ttaaagtaat cattaacacc caatctcata gaattttcca
1141 atatatgttg ggcactttc tcttcacaat tggaagcaac tctcaagata taccatttat
1201 atctattaaa ttctttacac tttaaactta tctcatcatc tgaaatcatc tcaaaatcac
1261 cagattcgcc actacagaat ccaggcggtt gattcaaaat atttttgctt tcatcacaca
1321 gatgcatata tacatacact tcacataact cttttatatc agactttgaa ttacataccg
1381 tttgataagg aataaacact tccttaaaat aaacagcatt acttaccat tgcgctatgt
1441 tttgctcata tccataatca actttaatga tataccattt atattcacat tccataaata
1501 attccaaata aagccttaat tacgtaaaga gacataaaat ccacaaaaca gaagaaaatc
1561 gaaaagcata atataacaat cattacaaca aatagagatg acaacacctc ctgtttcttt
1621 acccaagcaa ttcttcgtat ttcttgcttt atatcacaga aaaaaccaca caaacttttt
1681 aacattttcca ccacaacatt aatgcaggag cgataggaat tgaacctaca acctctggtt
1741 ttggagacca gcgctctacc aattgagcta cactcctata actcaaactc tcaactccaa
1801 atttcagaaa caacaccaga accaacagtt ctaccgcctt ctcttatcgc aaaacgcaat

```

|      |             |             |             |             |             |             |
|------|-------------|-------------|-------------|-------------|-------------|-------------|
| 1861 | cccttatcca  | ttgtatcgg   | tacttgcaat  | tctacttcta  | cactcacatt  | atctcctggc  |
| 1921 | attaccatct  | ccttcccatc  | tagcaatfff  | atgctcccag  | ttacatccgt  | tgtccttaaa  |
| 1981 | taaaactgtg  | gctggtaatt  | cgcaaaaaat  | ggtgtatgcc  | ttcctccttc  | ctctttcttt  |
| 2041 | aatatataaa  | cctccgcctt  | aaactttcta  | tgcggtgtta  | tcgtccccgg  | tttcgctaata |
| 2101 | acttgccctc  | tctccacttc  | ttctcttttt  | gttcctctta  | acaatatcc   | tacattgagt  |
| 2161 | cctgcacttc  | ccttatccag  | caacttctta  | aacatctcaa  | cacctgtgca  | tatcgtcttt  |
| 2221 | tgcgtcgctt  | tcagacctat  | tatctctatc  | tcttctcccg  | tctttatctc  | tcccttctct  |
| 2281 | attcttctctg | ttaccactgt  | tcctcgcccc  | gatatcgaaa  | atacatcttc  | gattggcaat  |
| 2341 | aaaaatggta  | aatccacagg  | ccttgggtgga | accgctacat  | attcatctaa  | cttttccatc  |
| 2401 | aatttgtcta  | ttgatttctt  | tccatattcg  | ctgctgtcat  | cctccagcgc  | cttgagcgt   |
| 2461 | gaaccaacca  | ccacaggcac  | ttcatcccct  | ggaaatccgt  | atttactcag  | taattccctc  |
| 2521 | acttccatft  | ctactaaatc  | tatcatatca  | gtatcagcaa  | catcagcttt  | atttatatac  |
| 2581 | accacgatat  | atccaacacc  | tacctgcttc  | gccagcaata  | tatgctctct  | cgtttgtggc  |
| 2641 | attggcccat  | caacccccga  | cactaccaat  | atcgccgcat  | ccatctgtgc  | tgcacctact  |
| 2701 | atcatgttct  | ttacatagtc  | agcgtgtcca  | ggacaatcaa  | cgtgtgcata  | atgccttttt  |
| 2761 | tccgtctgat  | actcaacatg  | cgctgttgct  | atcgttatcc  | ccctcttcc   | ttcttctggc  |
| 2821 | gctttatcta  | tctgatcgta  | cgctacaaaa  | ttcccataat  | gcttcggtat  | cgccgctggt  |
| 2881 | aacgtcgtct  | tcccatgatc  | cacatgtcct  | attgttccca  | catttacatg  | cggttttcca  |
| 2941 | aatgcttcca  | ctattgctgt  | cataattatt  | acccttaatt  | atactctaac  | tttaactcat  |
| 3001 | caaccacata  | ttgtggcact  | tgctcataac  | aagaaaaatg  | catactatac  | tgcgcccttc  |
| 3061 | cctgagacat  | agaacgcaaa  | acgttgatat  | aaccaaacat  | atttgcaaga  | ggtaccgaag  |
| 3121 | cagtaattat  | tttactatta  | ttacctaaat  | cgagcatatc  | agcaacattt  | cctcttctac  |
| 3181 | tatttatatc  | acccataaca  | tcacccatat  | attcttcagg  | agtaatgatt  | tcaactttca  |
| 3241 | ttataggctc  | cagcattttt  | ggaccagctt  | tatttgccat  | ctctttaaaa  | gcacctttag  |
| 3301 | cagcaagtcc  | aaaagctaaa  | ggactagaat  | caacctcatg  | aaaagcacca  | tcaagaaggg  |
| 3361 | tagccttaaa  | atcaatcaac  | ggaaatcccg  | aaattacacc  | accttctttt  | atcaactcca  |
| 3421 | agccattttc  | taccccagga  | atatactctt  | ttggaatagc  | accacctaca  | attttacttt  |
| 3481 | caaattgaaa  | cccagaacca  | ggctcaagag  | gttcaaatft  | tattttaacc  | ttagcaaact  |
| 3541 | gaccagctcc  | accagattgt  | tttttatgaa  | tgtaatcaat  | ttcaacagat  | ttagtgatag  |
| 3601 | tttcacgata  | tgcaacctga  | ggagcaccga  | cgttagcctc  | aacgttaaat  | tgcgcgttca  |
| 3661 | ttctatcaac  | aataatctca  | agatggagct  | cacccatgcc  | tttcaatata  | gtctggccac  |
| 3721 | tttccgcatt  | tactgacatt  | ctcaaagaag  | gatcttctgc  | aaccaaccta  | tttagagcaa  |
| 3781 | tacctaatft  | ttcctgatct  | gaagtggftt  | taggttccac  | agcaattttca | ataacaggct  |
| 3841 | caggaaatft  | catacgctcc  | aataatatag  | gaaaatcaac  | agaacataaa  | gtatctccgg  |
| 3901 | tggttgfttt  | cttttagccca | actaaagcaa  | ctatatctcc  | agccctagcc  | tcagttatat  |
| 3961 | cttctcggtt  | atttgcatgc  | ataagtaaca  | ttctgccaat  | cccttcagtt  | tcggtttttta |
| 4021 | acgcattttga | aacggtagat  | ttagacttta  | atttaccaga  | ataaatacgg  | ataaacgtca  |
| 4081 | agctgcctac  | aaattttatcc | gtcatcactt  | taaattgcaag | agcaacaaat  | ttctcttttt  |
| 4141 | ctgaaggftt  | gacctcaatt  | ttcttttctg  | aatcttttagg | atcaattcca  | acaattacat  |
| 4201 | caacatcaat  | aggagaaggt  | aaaaagtcaa  | ctacaccatc  | taaaagtgg   | tgtacgcctt  |
| 4261 | tatttttaaa  | agctgatcca  | cataacacag  | gaacaaaatt  | tcctttaatg  | gtcccatttc  |
| 4321 | tcacgcattt  | tttcagtaaa  | tccactggca  | gatcattaga  | ctcaaagtaa  | gtattcatcg  |
| 4381 | cttcatcatc  | catctcagct  | gcagcatcta  | ataaaaagatt | tcgatattct  | tgagccttat  |
| 4441 | caagcaaatc  | agaaggaata  | tcttcataag  | aaaatttagc  | gccaacggt   | tcttcttgcc  |
| 4501 | atataatggc  | tttcatagaa  | ataaggtcaa  | ttatacctft  | gaaatctttc  | tactcccta   |
| 4561 | ttggtaaatg  | aataactaaa  | ggtgctgcac  | caagcttcgt  | ctttatcata  | tcaacacatc  |
| 4621 | gataaaaaat  | tgcccctatt  | ctatccatct  | tattaacaaa  | gcagatacga  | ggaacgctat  |
| 4681 | atttatcagc  | ttgacgccac  | actgtctcag  | attgaggttc  | aactccagca  | actccatcaa  |
| 4741 | atacagcaac  | tgcaccatcc  | aaaaccctta  | aagatctctc  | aacttcaata  | gtgaaatcaa  |
| 4801 | cgtgaccagg  | agtgtctatt  | atattgaccc  | tatgatcatt  | ccaaaaacat  | gttgttgtag  |
| 4861 | cagatgtgat  | tgtaatacca  | cgctcttttt  | cctgctccat  | ccaatccata  | gaagctgcac  |
| 4921 | catcgtgcac  | ttcaccaatt  | ctattttgct  | taccagtata  | aaataaaaata | cgctctgttg  |
| 4981 | tggtagtctt  | accagcatct  | atgtgagcca  | ttatccctat  | atttctgtat  | ttagatatct  |
| 5041 | caattttccat | atcacaafta  | attagctaac  | attaaaaacg  | aagatgagaa  | aatgccttat  |
| 5101 | tagctttcagc | catttttatat | ttttcttctgc | acatcttaaa  | cgcaccaccg  | cgtttattat  |
| 5161 | aagcatccag  | tatttcagat  | tgcaaacaaat | caacagtggt  | ttttccactc  | ttttttcgag  |
| 5221 | cagcagaagt  | tgttttagca  | atccacctta  | acgctaaaga  | aaccgctcta  | tcttgtcgaa  |
| 5281 | cttcaacagg  | tacttgataa  | gttgaccac   | caatgcgtcg  | agaacgcact  | tctatagaag  |
| 5341 | gagtaacatt  | tcctactgct  | gtctcaaaaa  | ttgataaacc  | accttcgcct  | attttctttt  |
| 5401 | cagctaaaga  | caaagcgtca  | tagataatct  | tttctgcagt  | agattttttta | ccacattttca |

|      |             |             |             |             |             |            |
|------|-------------|-------------|-------------|-------------|-------------|------------|
| 5461 | tgattgtatt  | aatgaaacgc  | atcagcaaaa  | cactgccgta  | acgcgaatca  | ggacttattt |
| 5521 | ctcttttttt  | tgcttttattc | cgacgagcca  | taaacttttaa | ccagattttct | ttacaccata |
| 5581 | ttttgaacga  | gctttcttttc | gattttgcac  | accacgcaga  | tcaagggcac  | ctcttattat |
| 5641 | gtgataacgc  | acacctggca  | aatctttaac  | ccgccacca   | cgtatcaaaa  | caacagagtg |
| 5701 | ttcttgtaaa  | ttatgacctt  | caccaggtat  | ataagccgtc  | acttcaccat  | accactaat  |
| 5761 | ttttactctg  | gctacttttac | ggagtgtctga | gttaggcttt  | ctaggagtgtg | tagtatacac |
| 5821 | cttagtgcaa  | acacctctcc  | tttgagggtt  | gctttctccc  | aaagctggta  | cctttttctt |
| 5881 | atgggtcaat  | cctaactctac | ccttacgtat  | taattgattt  | atcgtaggca  | tatgttataa |
| 5941 | actcaagctc  | attaaaataa  | ctaagttttt  | agttataaaa  | taataaacct  | caatagtcaa |
| 6001 | tataaaaata  | aacattacta  | ctctaataat  | taagctcaac  | tgcttgaaa   | gccatcagta |
| 6061 | gacttcttgc  | actacctccc  | aagccacaac  | tgtcattcag  | tagaaaacgaa | aaaacttact |
| 6121 | tgacaccctt  | cgccagcccc  | attatcatgg  | tactgaaggt  | attcattttat | cttcaatctg |
| 6181 | tgacagattaa | acgacaacag  | tattacgtaa  | ttggcgtctt  | attttttaatt | ttttgacta  |
| 6241 | tgacactttt  | acgtcttcac  | aacattttctg | ggttttttacc | tatataagct  | gaaacgcgct |
| 6301 | tataaaagcgt | ttaagacagt  | atagtacgcc  | aatttgcagg  | attagagagt  | gacaactagc |
| 6361 | taatacggga  | tatcttttgc  | ctttttttct  | gcttagtaaa  | tttcttaaac  | atttaaacta |
| 6421 | aggtgagttg  | cattttaaag  | cagctaaatt  | gcagtgttta  | agacttaaaa  | aacgccaata |
| 6481 | ctgaaaatag  | acaatgacta  | gggcttcttt  | tgcttttttt  | tttgcttggt  | aaatttctta |
| 6541 | atattttatgg | caacatgaac  | tgagcaggaa  | gggtgcattc  | cagtgttgta  | cactggaatc |
| 6601 | cagttttcca  | tataatctca  | tcgaaaatgt  | tgtaaccact  | ttctgtgcta  | gtttgcttgc |
| 6661 | ttacaagcaa  | acttttctgg  | atctcagtg   | ctgggcactg  | ggatgacagg  | ggagggaggc |
| 6721 | tacttggaatg | acaccattct  | ttttcctgga  | tccaagtagt  | cagggcactg  | ggatgacagg |
| 6781 | agaaggtact  | aggatgacac  | cctgacctcg  | tcgtcccgct  | acgtgttagc  | ggaatctaga |
| 6841 | gataccgtga  | cggtatgacg  | taaagctcgc  | attagctata  | cttttatgct  | caccaactta |
| 6901 | gctggatcca  | agtagtcaag  | ctacttgga   | ctgcaaattg  | caatgttcgt  | acagctgcgt |
| 6961 | gcttgacact  | gggatttagc  | gcagctaccc  | taaactggaa  | gctcatcttg  | ctatttttgg |
| 7021 | ctgaaagaaa  | catattttta  | gaataatgaa  | aacaatcagc  | actttaattc  | aagaaggatc |
| 7081 | ggagttatta  | tcgtcacata  | aagttgaatc  | accacattta  | gattgtgaaa  | tcacatgca  |
| 7141 | gcacgtactt  | ggagtggaaa  | gatcattttat | aattgtgaac  | catgctgate  | aagtgccgat |
| 7201 | ggagaaagaa  | cttttatttt  | ggaaattaac  | aaaaaaaaga  | gcggaagat   | atccaatatc |
| 7261 | gcaaataata  | ggtaatcgtg  | aattctggag  | taaaaatttt  | atagttaacc  | agcatgtttt |
| 7321 | agatccaagg  | ccagatagtg  | aaacaataat  | cctagcagtg  | ttaaaatatt  | acccaaacaa |
| 7381 | aaaacagaaa  | ctaaaaattg  | cagatttttg  | tacaggcaca  | ggttgtttat  | tgatatccgt |
| 7441 | acttagtgag  | tatgaatatg  | ctgttggcgt  | cggttttgaa  | aaaagcttgg  | aagcatataa |
| 7501 | agttgcctat  | cagaacacaa  | aaaaacatga  | tcttctcagc  | agagccaaaa  | tatttccaag |
| 7561 | ttcgtggaca  | gagtgacagag | gttcattcga  | tcttataatc  | agtaatcctc  | catatattaa |
| 7621 | aagaagcaaa  | ttgaaagact  | tgcaagctga  | agtgcaaaag  | gaaccaagaa  | ttgcccttga |
| 7681 | tggtggtatt  | gatggtttga  | gctgttattt  | gagcattttt  | ccaatattga  | gaaagtgcct |
| 7741 | taaaaaaaaat | gggtttgcca  | tattggagat  | aggtgaagat  | caaagcaata  | ttgacaaaat |
| 7801 | aatccccctca | tacgaattag  | cttttcagga  | atatgtatat  | gacttagcgg  | gaatgaagag |
| 7861 | atgcattggt  | gtgaaaagaa  | catagcta    | gtttttttgc  | cttcatccca  | tattatccta |
| 7921 | tatcatccca  | gtaccctcta  | cctagtcata  | caagtagcgt  | gactacttgg  | atctatattt |
| 7981 | aactagatcc  | tatgggtcaag | ccataggacg  | acaggaaacg  | ttttatgcat  | tttttaaagg |
| 8041 | gcaacatggt  | taagctttgc  | tggcaaaatg  | gaaagtaaga  | ccagcctcta  | taccgtgtgt |
| 8101 | gtgaaatagt  | tgattaccta  | tattttatttc | ctcagttact  | ttgctacctg  | agctaggatt |
| 8161 | aagcttcttt  | tttttatcat  | tattagggtc  | gtctaccact  | tgtcctaacc  | tttttgctgt |
| 8221 | aagcttaata  | tcgctaccaa  | tagcaccaaa  | acctctatat  | ccgatatgca  | tatttacatc |
| 8281 | ttcgttttatg | cgatagtcaa  | agccagcttt  | taattgacct  | gcgggtctta  | ttgacggttt |
| 8341 | ttcaaacatc  | gtcattcttg  | ttgcaccgat  | cccaatacca  | acgtaaggag  | aaaaagagaa |
| 8401 | acggtcactt  | ttccaatgat  | gataaacatt  | tgccattaca  | gatagtgtct  | caatttggtc |
| 8461 | atgactaact  | gcagcactat  | agagataagt  | ttctttatta  | ggatcctcac  | cagtctcctt |
| 8521 | taggtatgaa  | acagtatttt  | ggctacttgt  | taaaccaata  | ttatccactt  | ttacagaaga |
| 8581 | atacatccct  | tccaattcag  | ccctatagct  | gttggttacc  | aattctccct  | gtgtaaccaa |
| 8641 | atgccacatt  | tcgagcaaaa  | gggtgattat  | aatctccttt  | atactcactt  | agtgactgac |
| 8701 | cttctgtggt  | ctgagcaccc  | ctgtcattta  | tagacaaaatt | tttgatacct  | gtagtgtgtg |
| 8761 | tttttagtac  | gcttgtgtta  | tttaaatatt  | gaccgtaata  | ccctactacc  | aaagtaaaac |
| 8821 | ccttctgttt  | cacttgcaaa  | agattgttgt  | gacaacaata  | aagcaaatgc  | tgtaaccgct |
| 8881 | aatgtttttt  | tactaatcat  | tactactccc  | ctagttaaaa  | tagctaattct | aatactaatt |
| 8941 | aattaaaaat  | ggcttaatat  | gaaaaagcta  | attattttgca | taacttgcac  | ttttctgagc |
| 9001 | taaaaatagg  | caaagttaac  | cttacttctc  | gtcatttttt  | aattttctca  | tcttcaaatt |

|       |             |             |             |             |             |            |
|-------|-------------|-------------|-------------|-------------|-------------|------------|
| 9061  | ctcctcttct  | togtcatcaa  | acccatcatc  | gtcctatcc   | tcatcttctc  | cgtcatcatc |
| 9121  | ttcaaactta  | togtcatgat  | cttcatcatc  | aatatcttcg  | tctgcaaatt  | catctgattc |
| 9181  | atcatatact  | gcattcttcg  | ttttagtttc  | agcaggataa  | tcaactgaat  | taggtccctc |
| 9241  | aagaacatta  | ttccctcgt   | tattaacctt  | atctttgctc  | gcagcggcag  | aaagaacttt |
| 9301  | gtttgggtca  | tatggttctt  | gtgtaggcac  | acgagtttgt  | ttgagcagcc  | ttcttgtgaa |
| 9361  | ggtgggtatca | ctgtagtaca  | aaattttctt  | tgattttaatt | gggtaagtcg  | actctattaa |
| 9421  | aattatctga  | togtcatcgt  | gcaacataat  | aacttcttga  | ggcaatagca  | atgctctctg |
| 9481  | tatttcagag  | atatgtaatg  | accttgaagc  | aggattttaa  | tctaaaaatt  | taggcttatt |
| 9541  | caacgattct  | tgttgtagac  | ttttgtttcc  | tataagttgc  | gatattaaat  | tagctgtttc |
| 9601  | aattattattg | gctgcaaaaag | ttattctgta  | agtcgagttt  | gacaaaaagg  | agttcatccc |
| 9661  | tgcttcttctg | tatattcctt  | tgagctgctc  | agtatcttga  | acaattaaga  | ataacctaac |
| 9721  | tcgataacca  | cgaaaatatg  | caatacctgt  | ttgaaattgc  | tccatttttc  | caagtgtagg |
| 9781  | aaactcatcc  | attaaaaaca  | atacgccata  | aggctcgtca  | tccgatggca  | attttctaca |
| 9841  | taaaaaactca | gttgctgtt   | ggtaaaaaac  | ctgcattaaa  | ggcctgagcc  | tagtcaagtt |
| 9901  | gtcaggagtt  | aaaccaacat  | aaactgtaat  | tttcttcttt  | ttaaaaatcta | gaatattaaa |
| 9961  | atcacttgac  | gcagttgcag  | tatcaatcaa  | tgggtttgcc  | cacaattcaa  | gtgatgagtt |
| 10021 | catgggtgat  | acaacacctg  | acctttcttt  | atcagctttt  | tgtaaaaaag  | ctgcaatatt |
| 10081 | catatatgct  | acaggggtgta | gtattttacc  | cattgtatca  | agagcaacag  | caagattata |
| 10141 | aaccacgtca  | tcactacgca  | tcgtacgcac  | aacttcacca  | aaagatttaa  | ctttctctgg |
| 10201 | tgcagcaagt  | aagtataata  | ccactccaac  | aaataagctt  | cttgcttcat  | tctgccaaaa |
| 10261 | gtcttggttca | ggcatgatta  | ggtagctat   | tttctgcaca  | tcgtcaacca  | tctgcccagg |
| 10321 | tttttcaacta | atccattgta  | atggattgta  | acagtgactt  | attccatctg  | gctgcgctgg |
| 10381 | attccatacg  | tatacttttt  | gtccttgctg  | ttctcgccaa  | ccacttgtta  | tttcatagtt |
| 10441 | ttctaatttt  | atgtcgtgta  | caattaccga  | gtcagtccaa  | aataataaat  | taggaattac |
| 10501 | aaagccaaca  | cccttaccag  | aacctgtagg  | tgcaaataac  | aatgcatgct  | gaaacccatc |
| 10561 | agaaatgaag  | tatcctcttt  | tatctttacc  | aagcaataat  | ccctttttgc  | ttcttaatcc |
| 10621 | tgcttttctgt | atgtctttct  | ctgatgccca  | ctgcgaatct  | ccatgaagtg  | attccttctt |
| 10681 | tttaaattgg  | cgccactcaa  | ttatcctttc  | tcttaaatct  | cataagataa  | tcatataaac |
| 10741 | aatgataggc  | agtgcagaag  | atataattaa  | tgtgattttg  | agctcaaggc  | tatataactc |
| 10801 | tggatgatgc  | caacaatatt  | gtatatgatc  | aaaaatcgtt  | ggccaaagag  | cttgagggaa |
| 10861 | aggcgtcaaa  | ctaggattaa  | ttgccttaaa  | atccacagca  | tccggaccat  | cagcaaacag |
| 10921 | aacaaacaat  | ataccagata  | gatagaagca  | aaactcaagt  | acgctaaaag  | ctactacacc |
| 10981 | tcctatgaga  | atattacgta  | ggtgattttc  | attactcata  | aactactctt  | ccttaactta |
| 11041 | tgtataaatt  | taagcatttt  | cgctcgcaga  | tctagtaaat  | aatatctcag  | aaatgcttct |
| 11101 | tttgccccc   | ccggttcttt  | ttagctgaat  | aacaatatca  | atcacatttc  | taatgtatgg |
| 11161 | tataattttg  | tctggaggaa  | tgccaagggt  | tgcttgcata  | accatcagtt  | ttatttgctc |
| 11221 | aagggccatt  | ggttgactat  | ccgcatgaag  | ggttgatatt  | gatccagggg  | gaccagtatt |
| 11281 | tatcgcccta  | agaaaactaa  | aagcttcgcg  | tccacggagc  | tcaccaacta  | ttattctgtc |
| 11341 | tggccttaaa  | cgtaagcacg  | cttctatcaa  | atcttgagtg  | gttacttttg  | ctctgccctg |
| 11401 | ccctccttta  | gaggcaatta  | gatggacttt  | attgggatga  | tcgttcaaaa  | cgatttccct |
| 11461 | tgcacctca   | acagtaataa  | ttctttcctc  | atctggaata  | gcacgcaaag  | tagcattagt |
| 11521 | aaaagtagtc  | ttaccagtg   | aagttccacc  | actaattata  | atatttttct  | tacttattac |
| 11581 | agcgtattct  | aaaaactctt  | ttattttttt  | ttgccttaac  | agtaaatcca  | aatgacggtc |
| 11641 | aactggatta  | tcagttgctt  | ctgtaacagt  | ttcagaaaaa  | gccccattt   | tttcgtaatc |
| 11701 | atcgagtgt   | aattgcatgc  | tagaaggctt  | acgaatcgac  | atgactactt  | tatcaggctc |
| 11761 | acatgctggc  | ggaaataacta | tctgtatacg  | ataaccattt  | ggtaatgttg  | ccgaaagtaa |
| 11821 | cggcgcttct  | tcgctaagct  | tttgttctgt  | agcttgagca  | atcagtctgc  | caagagattt |
| 11881 | caaatggtta  | agatcgaata  | tttctaattt  | ttcacacctt  | acttcaccac  | gattttcaat |
| 11941 | ccatacttcc  | tttggttat   | ttattgatat  | ttcattttacg | ccttcttctt  | gaaatatgcc |
| 12001 | ctgtaatggc  | tccaaatatg  | tatcaagtgc  | agcatagttc  | atttcattga  | tttaatatgg |
| 12061 | cctgtggagg  | aaatactata  | tcttggttaa  | caaatacttt  | caatgcagtg  | ccttgatcaa |
| 12121 | cataaatagt  | tggtttttta  | tctgtataatc | tgcccactat  | atctcgcagt  | tctttagaaa |
| 12181 | aatcattgat  | tgatttcccg  | attgcttcat  | cataaacaga  | tttgcttctt  | ttctgagttt |
| 12241 | gcctcaacag  | ttgacgtaca  | tcgtctaaag  | ttataccgat  | attgtcacta  | gtaattgcat |
| 12301 | caactccact  | agctccagaa  | ctttttatca  | cacttactat  | ttcttctctt  | attattctca |
| 12361 | gtaaatcctg  | atcactttta  | gcattccgaa  | ttttttcaat  | agccctaaga  | cccaatttcc |
| 12421 | atttttctgc  | tcctaccttc  | ccaacttcag  | tttttatagc  | atcctccaat  | ctctcaacaa |
| 12481 | tagccccctt  | gagagaagaa  | atatctattt  | cagttgcagt  | aatagacttc  | actgcatcca |
| 12541 | tggcagttag  | cgcacgcata  | agattagaag  | ccttttgccc  | tataacagcc  | gaactaattg |
| 12601 | aaacaccagc  | aagtgccact  | gaagagaata  | acgcacttac  | tattttatta  | tcaactattc |

|       |             |             |             |             |             |             |
|-------|-------------|-------------|-------------|-------------|-------------|-------------|
| 12661 | ccgctatccc  | tgctctacca  | agctcgtcag  | tactaagtga  | tgagatggca  | acatctattc  |
| 12721 | catgtggcag  | aatcactcta  | ttccagttta  | tattttacacg | agattttagca | acatttcgagt |
| 12781 | caaatgaata  | actacctatc  | aatcttgagc  | cttttaggtat | taaaactgta  | tcaccagttt  |
| 12841 | ctgcataaac  | atctctactc  | accatagcac  | gcagcattcc  | ttgcagatca  | gaattttattg |
| 12901 | cagtttcaag  | aacagcatca  | ataatttttac | cttgagtaat  | cattaaacca  | agcttttccta |
| 12961 | ctctggtagc  | tttgctcgac  | tgtgctgaag  | tgtcggataa  | aatagcatca  | gcagccttgt  |
| 13021 | tctctccact  | actacctgaa  | attgttaaca  | tttgtgact   | acgtctgtct  | ctaggataac  |
| 13081 | ctccgcccc   | tattgtagga  | aacgaggtag  | gtaaattgct  | aataacatta  | ctagaaggaa  |
| 13141 | aatttggtct  | tggcaaaaata | ggtatatattg | acacaggggt  | ttcttttgggt | ttctcttctt  |
| 13201 | cttttttaaat | ttgttttatt  | tctgggtacga | tttgtggtgt  | aggaagagga  | ggtaaggggtg |
| 13261 | gtaaggaatc  | ggttattatt  | ctttctggaa  | ctattacatt  | atctggaact  | tgttccaact  |
| 13321 | ttccttttaaa | ttcttgaacg  | ttttgctttg  | tttcctcttt  | tttaataact  | tctgaatcct  |
| 13381 | ctttatgaga  | aggactaaaa  | tagaaataat  | acactacacc  | aaccagaagc  | actaaaatca  |
| 13441 | taaccatcaa  | tgccctatga  | ccttgattag  | agccaactgt  | tactaccttg  | ttctctattt  |
| 13501 | ctgactcatc  | ttctgaattg  | ttacgccttt  | ctttattcat  | attgcatgta  | ccacagctaa  |
| 13561 | agtgccttat  | ttataatttc  | aacttcatca  | tcttcataac  | gcataaatag  | ctttttatgt  |
| 13621 | acccttttta  | ttataacata  | atcatcaaat  | aacagccttt  | tacaagggtt  | atcctccctt  |
| 13681 | tctacaaaaa  | tctgaggtat  | tttattatta  | tttctaaatt  | ttaaataggt  | taaataacca  |
| 13741 | tcatcaaata  | actcaatcgg  | aactatatcc  | gcattaccac  | cttcatcaat  | atatgtataa  |
| 13801 | ttatacttcg  | tatcattttc  | ttgtattatt  | ttttctagct  | tgtctgtagt  | atactgcatt  |
| 13861 | tgagtaggta  | aagaaacctc  | atctaaatca  | acatcaaatt  | caccttcttc  | ttgaggataa  |
| 13921 | taaaaacgta  | ctacgtaaga  | tatatccttt  | tcagcagaat  | aatcgtgatc  | cactttctta  |
| 13981 | gcattagtgt  | ccagggtattt | atcgtagttt  | ggccttgaga  | ttaaatcaaa  | aatgtaattt  |
| 14041 | cttttttttag | ttgtcgtaat  | aatcatgtta  | gtgcggctac  | taacttcaaa  | tggcatgata  |
| 14101 | agcaatttat  | tgtcataagg  | attaattttc  | caacttgatg  | catcaccaac  | agcgatattt  |
| 14161 | ttaaacttttt | ctccttccgc  | aaattcaata  | taagaatagt  | aaccctgact  | aaaaaccacc  |
| 14221 | gtaaataactt | cattagggct  | atacacaaaa  | gtcttttattc | tactatctac  | agaaataggt  |
| 14281 | tcattataat  | taatggatgc  | gtttaaattg  | ctacttacia  | gtaaaactaa  | aactaataat  |
| 14341 | atcctataca  | tattcatcat  | ctactctata  | tgaaataact  | tgaaacccta  | atgggttaat  |
| 14401 | atatctttgc  | tgatcattca  | tttcaagcga  | tgcatatcta  | tatgacataa  | taactatctt  |
| 14461 | attttttctt  | gtggaacttc  | catctttccg  | tataaattcc  | acaaaaaacc  | tcacctgaag  |
| 14521 | agcatcgtta  | cccaattttt  | gaatcgagcg  | aatttttaaat | tcattttttgg | tatctgaata  |
| 14581 | taaattaaaa  | agatcatcca  | tattctgcca  | tcctatatata | tttctaaatt  | cattatacac  |
| 14641 | attagatgag  | gaaaacaacc  | tcacctttgt  | ataatagtta  | taattataat  | gatatggatc  |
| 14701 | aaaaacctcc  | cttgcttttta | tatactctga  | aataaaaataa | tcgttcagcg  | cttcatctgc  |
| 14761 | agaataactgc | tttactgtga  | caggatcaac  | caattgcact  | attccagatt  | tcttgtcaat  |
| 14821 | ttctataaca  | aatgggtcaa  | tagtgctact  | tgtgctaatt  | ttaaatatga  | ctaatatgct  |
| 14881 | gatagagatc  | gttgctaata  | atattaacgc  | aaataaaaagt | agaatattcc  | tttgagcaat  |
| 14941 | aactgtgctg  | tagcgggtttg | aattccaatt  | tatatcctta  | tctaacgatt  | cagtactttt  |
| 15001 | ctctcgctta  | aaaaatctta  | gcatttttaat | attcttaaaa  | atcttaactt  | gtgttaataa  |
| 15061 | acatagcaaa  | ttaacaaagt  | agttacaaca  | aaaaagctaa  | aaaactctta  | acttatggcc  |
| 15121 | tagcttacca  | aactttgtct  | ccatatatga  | atcggttatat | ttattacgtt  | ccacaataag  |
| 15181 | tggtagacac  | tttgtaacct  | ctataccact  | actttccaat  | tctgacaatt  | tcctatcatt  |
| 15241 | gtttgtgaagt | aattggattt  | tgttaatgtt  | caattttctta | agcatttttag | ctgcaacaac  |
| 15301 | aaaactcctt  | tcatcatctt  | caaaacccaa  | tattctattt  | gcatacaacag | tatcaagggtt |
| 15361 | atgttctctt  | tgcatactgt  | atgctcttaa  | cttattagtt  | aaaccaatac  | ctcttccatc  |
| 15421 | ctgcatcaaa  | tacaatataa  | taccacttcc  | aaagtcagct  | atcatttgaa  | ttgcttgatg  |
| 15481 | taactgactt  | ctgcaatcgc  | atgataagct  | atctaacaag  | tcacccgtat  | agcacgaaga  |
| 15541 | atgaattctc  | actaatgggt  | cgtcatcttt  | atctggattg  | ccaatgataa  | ttgcatgatg  |
| 15601 | ttctcttcca  | ccactttcgg  | ttctataaga  | tatgatattt  | acttcttgag  | tctgttttaa  |
| 15661 | aaataatgat  | gttttgcaac  | cttcatatac  | atcctgattt  | tcttgaaaat  | tatttatgaa  |
| 15721 | tgacgtgtcc  | agtgaataaa  | cgtcattttt  | ctcgcaccaa  | tttcgcattt  | catggttatt  |
| 15781 | ctcaaaagtc  | atatcagcca  | ctaacgcgta  | tggcaataat  | tctgagaact  | taagcaaggc  |
| 15841 | aatagcacat  | tcactctattg | tctttgagca  | ttgcaactct  | tttatgcaat  | cttcctttga  |
| 15901 | acagttttatt | aaatagagca  | gttcatcaaa  | attattcacc  | aacagacgtt  | tgctgttatg  |
| 15961 | ttcttttattc | tgagatatgt  | atttttacctt | acttgaagtt  | aaagtaacat  | atacattact  |
| 16021 | tgatgtaagc  | ttgtattgat  | taaataaatc  | tctttctaaa  | gcctcagcag  | cagcaaacaa  |
| 16081 | taggtaatta  | ctttcatcat  | atattacaat  | tggccgaccg  | cgctgatatt  | cgctgatagc  |
| 16141 | tctttctacc  | ttattgctac  | tctgatttcc  | tataaacatt  | tttaccata   | ttaaacagcg  |
| 16201 | ataaaaactg  | gtgcggccga  | gaagacttga  | acttccaagg  | ccttatgagc  | cacagcgacc  |

|       |             |             |             |             |             |            |
|-------|-------------|-------------|-------------|-------------|-------------|------------|
| 16261 | tcaacgctgc  | gtgtctacca  | attccaccac  | ggccgcacta  | tattctagtt  | tttatataat |
| 16321 | tatttttaaat | tacttaatca  | ttttagaatt  | tttcatctag  | agtgtcaatc  | tgatactaga |
| 16381 | ataatttaga  | aattgtttgt  | ataatttgat  | tatgaatttt  | gtgattataa  | attttaatca |
| 16441 | tttaagataa  | ccttactact  | aatttttaac  | ttaggttttt  | atacaaatga  | atatagctaa |
| 16501 | tatcttttatt | tttttagctc  | tctctcttat  | aactagcttt  | catttcgtcc  | atgcacaaat |
| 16561 | attatacaca  | tgggtctcaag | ttatcccaga  | aaataaacta  | agcatacgcg  | caattacgga |
| 16621 | caatgacatg  | tgtcccattg  | tttatgttga  | tggcgaggaa  | acagaaatgc  | tgaatcgcag |
| 16681 | ctcaattaac  | aatggtgatc  | ataacgaaac  | agtttgtgaa  | ctgacagtac  | aaacaagtgc |
| 16741 | caaaaacatt  | agtattgaga  | atctacgggt  | tcctatatta  | ccaaaaaagg  | ttaataaaat |
| 16801 | tgctttcatt  | ggtgacacgg  | gctgtagaat  | aaatatgtta  | tttcagcagg  | aatgtaattc |
| 16861 | ggtagatagc  | tggcctttta  | aaaaaaat    | agattcaatc  | gcccttcata  | aaccagattt |
| 16921 | aattatccat  | gttggtgatt  | atcattatag  | acaaacaaaa  | tgtagaaata  | caaaaaagtg |
| 16981 | tggcgatatt  | tatggataca  | ataaagaagt  | ttggtacgct  | gattggtttg  | agcctgcaaa |
| 17041 | ggatattttta | tcacaatccc  | ctttcctttt  | tgttcgtgga  | aaccatgaga  | gttgtgatag |
| 17101 | agcttatgaa  | ggatggttca  | ggtatctaga  | ttcatacccc  | ttttcgtctg  | aaaaatgtgg |
| 17161 | aaacttcggt  | tctagttggt  | ccttagatgc  | tggaccgatg  | aaatttttta  | tcttcgactc |
| 17221 | ttcatccggt  | gaggatattt  | ttacaacca   | aagcacaatt  | gatgcttttg  | agaggcaatt |
| 17281 | tgataaattg  | atacaaaata  | gttctgacaa  | gcccatgtgg  | tttttaactc  | ataaaccgct |
| 17341 | ttggagatct  | ccaaaaaaag  | aatttttgac  | attaaaaagc  | catggtaatc  | ttacacaaat |
| 17401 | cgaagctttt  | ggagataaat  | ttccaagcaa  | tgttactacc  | atagtttctg  | gccacattca |
| 17461 | tatagcccag  | attttattaa  | tggataatgt  | tccagaccaa  | attatagttg  | gaaacggtgg |
| 17521 | tgcatcatta  | cacgctcaag  | atcaagaatc  | tgtttatcaa  | aatgtagaat  | tgactatttt |
| 17581 | aaatggtaaa  | aactacttag  | cacacgaggt  | tagaaacttt  | tttggctttg  | gctttgcaat |
| 17641 | actaaattta  | gatgatcacg  | aatttacctt  | ctataatcaa  | cacaataagg  | aatgtatttc |
| 17701 | tgccaagcta  | acagaagatt  | ttaaacttaa  | acggattaaa  | actatagtcg  | attcatttta |
| 17761 | ggatttggtta | ttagctattt  | taaaaacgct  | acttaaacat  | tttttttaat  | cgattgattt |
| 17821 | catcagcaaa  | ttttgagtcg  | gtctttataa  | aattttctac  | ttgttttact  | gcatgtataa |
| 17881 | cagtagcatg  | gtctctgcca  | ccaaagtttc  | tcccaatatc  | tggtaggctt  | ttttgcgtaa |
| 17941 | attttttggc  | aaaatacata  | gctattttgtc | ttggccttgc  | aagactgcga  | agccttctat |
| 18001 | tggattgcat  | atctgcaacc  | tttatattga  | aaaattcagc  | tactttcttt  | tgtatttctt |
| 18061 | ctattgtgac  | tgacctatga  | tttgacctaa  | gaagatcgat  | taggggtttca | ctagctgatt |
| 18121 | ctaccgtcat  | acttcttcca  | attaatgagg  | tatgggtaac  | cttattttaat | gctccttcta |
| 18181 | attctcttat  | attagatttt  | atgttccttg  | ctaaaaactc  | taggacatct  | ttcggaacat |
| 18241 | acataattcat | ctgctccact  | tttgccctgca | atataccaag  | ccttaattca  | aaagtgtgtt |
| 18301 | cattaatatc  | tgccaccaac  | ccccaaccca  | gtcgtgattt  | tattctttct  | tccactccat |
| 18361 | caagatcact  | aggagacctt  | tcagctgata  | taaccaattg  | tttattttgg  | tctatcaatg |
| 18421 | cattgaaagt  | gtgaaaaaat  | tcttcttgtg  | tactatcttt  | accactgata  | aattgcacat |
| 18481 | catctaccat  | caatacatct  | actgatctaa  | attgctcttt  | aaataacata  | atatctttgc |
| 18541 | ttcgcagcgc  | tgtaatatat  | tggtagatga  | atttctctgc  | tgataaatac  | accacttttc |
| 18601 | tttttgctga  | tggggaattg  | actatgtgcc  | aagctatagc  | atgcattaga  | tgtgttttac |
| 18661 | caagtcccac  | tccaccatat  | agaaacaaag  | gattgctgcc  | taatattgga  | tctatagatt |
| 18721 | ctgccacacg  | ctttgccgcc  | gtaaatgcta  | attcatttgg  | ctttcccact  | acaaaattat |
| 18781 | caaaggtgaa  | ccttggtatcc | agcggcgaac  | caagattatg  | attactttcc  | tctctgtttt |
| 18841 | ttagtataac  | attaaaaatt  | gaattcctct  | cctcaattac  | ttgaatatca  | atagaacgta |
| 18901 | tactttttatc | ttcgcttttgc | cataatgata  | atattttttt  | catgtaatga  | actgtaatcc |
| 18961 | actctttttat | aaaccttgtt  | gacacggata  | aaagaacttc  | cccattttctg | ctactgacaa |
| 19021 | attttagtgga | actcagccag  | ctatttatatg | ttgcttctcc  | ataaagatta  | taaagacaat |
| 19081 | tttggatttt  | ttcccaagta  | acattgtgat  | ccgttactgt  | aataatctga  | tcaaaaaaca |
| 19141 | tagtagaaac  | ccttagggcta | gttaagttca  | tataccacac  | caagaaaaaa  | gcaataatta |
| 19201 | gaaaaatata  | agataatcaa  | tagcctactg  | caaaatgaaa  | agctaatact  | acttaataca |
| 19261 | tactaaaaat  | tatggtgatt  | ttttgatggg  | ttgtaaaggg  | tataaaaaaca | ttaaaattga |
| 19321 | tcattttttat | ttcaaaaaaa  | tgaaaaaatt  | gtaaatgtcg  | cttgtatcga  | ggattagaag |
| 19381 | catgcaaaaa  | cagtaataca  | ttatgtataa  | ataagatgtt  | aaattttactg | ggaaataagt |
| 19441 | aaagtattca  | tataaatata  | gctaacctaa  | tatagattta  | ctgaagcaaa  | tttatgatta |
| 19501 | tattaagtaa  | tttgagttgt  | tatgctgtat  | taggtattga  | actagagttt  | tacattgaag |
| 19561 | gaatagaaaa  | agaatactta  | tttctgaata  | gcatacaaaa  | taaaatagca  | tctcttgaat |
| 19621 | tttcttgcga  | gaaggagaat  | tctacacatc  | agtatgagat  | aaaaagtggt  | tgttatacga |
| 19681 | actcctacaa  | tttaattaaag | catttttgagt | tagcaaaaaca | atcacttact  | gaaacagcac |
| 19741 | aaaaactagg  | tgggaatgtt  | tcttttaaaag | caaagcctta  | tttggataga  | gcaggcagtg |
| 19801 | cattaaatgt  | gcatgttaat  | ctcgtgaatt  | caaataacgg  | taacttattt  | tatatcaatg |

|       |             |             |            |             |             |             |
|-------|-------------|-------------|------------|-------------|-------------|-------------|
| 19861 | agcaaaagta  | cagtgactat  | ctgattcata | gtattggtgg  | attatgtgca  | atgatgaaaa  |
| 19921 | aacatatggt  | gttttttgct  | ccaaatgatg | attcataatt  | aagatttcag  | tatccggata  |
| 19981 | ttcacactcc  | aactacgatt  | agttggggag | taaataacag  | aactgctgcg  | ataagaattc  |
| 20041 | cctattttgg  | caacgatttc  | aaaagatgcc | gcctagagca  | ccgcgttccc  | ggagcagatt  |
| 20101 | gtgaccttga  | aaaagtactc  | acagcaataa | ttgaaggtat  | ggtttttggg  | atagagaaca  |
| 20161 | aaattgctcc  | gccaaatagg  | gtctacggca | ttgcatctga  | tcctcaatat  | gagatggaga  |
| 20221 | ggttaatata  | acaactatct  | atcaaatcct | aatccgttaa  | accccttttg  | ggtaattggc  |
| 20281 | tgtttttagca | ttttttttac  | atcattatct | acatttttgc  | actgtaatat  | caagtctaaa  |
| 20341 | gcagatagtt  | tctgcgtgct  | tttagattca | agctctagat  | tgcttaacac  | ttgcccagga  |
| 20401 | agtggtttac  | caggcacatc  | catgtgctca | ggaagaggtt  | tcattctgatt | ctttatagag  |
| 20461 | ctagagttat  | tttgtgtaag  | agttttatca | tttagcatgc  | taagaataat  | ttcctcaggc  |
| 20521 | actaccatag  | tttttgtata  | atcaacagga | ttactatttt  | cagcatctat  | agtcacatga  |
| 20581 | attgggttcgc | caaacgcatt  | tataggacca | ccaagtgatc  | ctttctccat  | gcgttcttgt  |
| 20641 | gctcttttcc  | ttattatttc  | ttcttctaac | tcagtttcag  | ttttttctgg  | ttcttttgcg  |
| 20701 | gtatcttttt  | cttcaccttc  | atcaacactg | ctataccctt  | catcttctga  | aactttctct  |
| 20761 | cctgaaacac  | cagtaatttc  | aggctgttct | tttttagttc  | ttatttttatg | aatcagcgaa  |
| 20821 | agtaataagt  | aagtaactgc  | agcagcagaa | acgataatgg  | ctatctttgc  | ggcaatgtgg  |
| 20881 | attgctgtta  | aaaatattaa  | agctgataaa | gctccagcta  | atccagacac  | aataacttta  |
| 20941 | tttttgccct  | ttgttatatt  | tagaattgcc | accataataa  | cctctcaaat  | actgttctag  |
| 21001 | aattattata  | caggaatttt  | cttatacttg | caattttgcg  | aaaattttta  | ttatttgcatt |
| 21061 | aaagttttta  | agctacacaa  | ggattaatta | atatgcaatg  | tatctcgact  | ataatattgt  |
| 21121 | acaaacacac  | atattcagct  | aacattcaac | atgcagagct  | tactcataga  | gcgaaacagg  |
| 21181 | gcggtggtat  | tattacttat  | agtaattttt | atcttcggtt  | catacgttta  | tgtaaaaatg  |
| 21241 | ccaagggaaa  | gcaatcctga  | tatacagatt | cctataatca  | gcgtgtttgt  | tggacttcct  |
| 21301 | gggatttctg  | ctcaagatag  | tgaaaagcta | ttagtgcctc  | ctatagaaaa  | tgaactaaga  |
| 21361 | tccatcgaag  | gtgtaagaga  | attgagagct | tttgcaacta  | atgatggtgc  | tcacatgata  |
| 21421 | ctcgaatttg  | gaacagagta  | tgataataaa | gaagtgcctg  | ataatgttcg  | ttcaaagctt  |
| 21481 | tcaaacataa  | aatcgaagtt  | acctgttgaa | gcggaatctc  | cgataatcaa  | tgaaataaac  |
| 21541 | ttgagcttat  | ttccgatact  | caatgtcggc | ttaattggta  | atttgccaga  | aagatcctta  |
| 21601 | actgaaatag  | cacgcaagct  | aaagaaagaa | atagaatctc  | tgccaaatgt  | tctcaaagtt  |
| 21661 | gaagtggcgg  | gtatgcgtaa  | agaaacagtg | gaagttataa  | ttgagcccac  | agttctaaca  |
| 21721 | aaatataaca  | ttcaatcaaa  | cgaaatattc | caagctatat  | caagcaataa  | tagactagtg  |
| 21781 | ggagctggat  | cactggaaaa  | tgacaccggg | aaatatctga  | ttaaaatatc  | aggattacta  |
| 21841 | aaagatatag  | aagatattat  | gaatattcct | attagatctc  | aaggcgatgc  | agttttgaga  |
| 21901 | ataaaaagata | tagcaaaaagt | ataccctagg | tttgaagatc  | accaagggtt  | tgctcgcatt  |
| 21961 | aatggattac  | ctagtgtcgt  | gctagaaatt | tcaaaaacgta | acggaaaaaa  | acataataga  |
| 22021 | cacagtaaat  | caagtaaaat  | acttaatgga | taaggcaaaa  | gatcaattac  | ctgaaaattt  |
| 22081 | aaaagtgggtg | tacttaaaccg | accagtcaaa | aaacgtccgc  | gatgtgcttg  | atgacttgga  |
| 22141 | aaacggcata  | atatttgctg  | tgttgttaat | attgatcata  | atgatgcttt  | ctatgggaac  |
| 22201 | aaggattgct  | attcttgctg  | cactctcgat | acccgggttc  | tttctcattg  | ggataatagc  |
| 22261 | tctttacttt  | atgggtataa  | ccttaaatat | cgttgtgctc  | ttcagtttaa  | ttatggctgt  |
| 22321 | tggcatgctg  | gttgatgatg  | caattgtgat | cagcgaatat  | gccgatagaa  | agatgatctg  |
| 22381 | cggaatgggc  | aaagtagaag  | cctttcacac | ttcagttcgt  | gatatgtttt  | atccggtcct  |
| 22441 | atcatcaacg  | ttactaaat   | tggcagtggt | ttttccttta  | ctactctggc  | ctgatactgt  |
| 22501 | gggaaaattc  | atgcagtata  | taccaattac | aataatttta  | actttaaccg  | gatcgcctcat |
| 22561 | tatggctctg  | gttttttatac | caacacttgg | tgcaatcttt  | ggaaagccat  | cagtaacttc  |
| 22621 | aaaggaagaa  | attgaaaaaa  | tgaatgctat | cgaaagtggg  | gaaataaaaa  | atgctggggc  |
| 22681 | tataataaga  | gcttacgtac  | gaatgctaga | gaaggttttg  | gatcatccta  | aaaaattcgt  |
| 22741 | atgtgctact  | gtattcgttt  | tgttttcatt | tagtggtgctg | tacttttactt | ttggtcctgg  |
| 22801 | agtaaagtgt  | tttccgaaaag | tggattcaga | taatatttta  | atcagtgtta  | aagcaaaaaga |
| 22861 | aagcttatca  | gccaaagcac  | gagatctgat | actcaaagaa  | gtggaagaac  | gcatttttgag |
| 22921 | cattgaaaaa  | gaaattcatg  | tttcttatgc | tagatcagga  | gcatttttcag | acaacgttat  |
| 22981 | cgccagaata  | caactagaac  | ttatggattg | gcgcttcagg  | cgcaaagcta  | agcacatact  |
| 23041 | aaatgatata  | aggagcagtg  | tgcaagacat | gaaaggaata  | ataattaatg  | ttcaagagga  |
| 23101 | aaagccagga  | ccgtcggctg  | acaagccaat | acaaatcaac  | ctcagcggga  | gtgcatccag  |
| 23161 | tttgaattta  | gcagcagaga  | aaattctaga | aattatgaac  | caaccttcat  | ccgggtttat  |
| 23221 | aaatattcaa  | gatagcagat  | cagcacctga | aatagagtgg  | aatatgagtg  | ttgataagaa  |
| 23281 | taaggctaca  | agctctgaag  | taagtgttgc | aaccattggc  | gatttttataa | agatggttac  |
| 23341 | aaatggagtg  | ttgattggaa  | aatatagacc | aaataacacg  | gatgaagaaa  | tcgatattgt  |
| 23401 | actccgtttc  | cctggaaaagg | atcgcaacat | gaagactata  | gacaatcttt  | ttatcaatac  |

|       |             |             |             |             |             |             |
|-------|-------------|-------------|-------------|-------------|-------------|-------------|
| 23461 | agttaatggc  | cgtatccta   | tgagcaatat  | agtaaaatat  | gctcccgaaa  | aaaaggtaaa  |
| 23521 | caaactaaac  | aggattgatg  | gattacgcac  | agtgacaatc  | tctgctgacg  | ttgatactgg  |
| 23581 | ctatcttggt  | gatgaaagag  | taaagttcat  | tcagaattct  | attgcccagg  | attgggacaa  |
| 23641 | gggagtaaaa  | attgatttta  | aaggcgacaa  | agaagatcaa  | caaaaatcag  | gagcattttt  |
| 23701 | gttaaaggct  | tttatattag  | cgattacact  | aatgatattg  | gtattagtga  | cacagtttaa  |
| 23761 | taatgtatac  | catacattta  | tcgtaatgac  | agcagtgttt  | ttatccacaa  | catgtgtgtt  |
| 23821 | ttttgttttc  | tttcttatcc  | aacaagtttt  | cgtagttggt  | atgtgtggag  | tggggataat  |
| 23881 | tgctttggca  | ggaattatag  | taaataataa  | catactattg  | cttgatgcct  | ttcatcacca  |
| 23941 | aattaaggta  | cacaaaaatg  | acatcaagcg  | atgtgtaata  | aacgctgcaa  | tttctcgcgt  |
| 24001 | taggccaata  | ttgcttaccg  | ttgcaaccac  | agttcttggt  | ttaataccga  | tgattaccag  |
| 24061 | gttaaatatc  | aattttttta  | cgctacaaat  | cacatatgat  | gctccatcaa  | gccagtgggtg |
| 24121 | ggttgacatt  | tcaacaacca  | tagcaagtgg  | aatattggct  | gcaacgggtt  | taactttatt  |
| 24181 | ctttactcct  | gcgttgcttg  | ttatacaaaa  | acatgaaaaa  | acttgactta  | aattagcaat  |
| 24241 | catttaacat  | ttaagatagt  | gttctttgcc  | cgttggagct  | ataattataa  | ctaattacat  |
| 24301 | tggattttatt | tattatgatt  | gctaatcgta  | aaagcagtgt  | taagcagaaa  | agtaacaaga  |
| 24361 | ataacatagt  | tgggaagcctt | gatgtaataa  | aaacagcagg  | agagctttca  | cttcaaaaag  |
| 24421 | gttttagattt | tgatgttgta  | ataaaggcac  | tagaaaagtgc | tatagaagca  | gtggctcatc  |
| 24481 | aaaaatatgg  | tagcaaaagt  | aaaattgtag  | ttgatataga  | tagaaaacaca | ggcaaagtta  |
| 24541 | cttcatatag  | aaaactaaaa  | gttattgatg  | atgaatcaaa  | tgaaaaagag  | aataccgagt  |
| 24601 | gtgaatcaat  | tacgcttaca  | caagctaaat  | taataaaaagg | agatgcaaaa  | gttggagata  |
| 24661 | ctgttagtga  | attactctct  | cttaacactg  | atcttgcttc  | agcaagaatt  | gccagcaaaa  |
| 24721 | agattgctca  | aataattaaa  | gatgaagagt  | caaaaaagca  | atatgaggaa  | tttaaagata  |
| 24781 | aggtgggaga  | aataaggtat  | ggtattgtta  | aacaagtaga  | atattcagat  | cttattatag  |
| 24841 | acataaatgg  | cactagggca  | tatcttccat  | tgcgaaattt  | aactggtggt  | gaatcatttc  |
| 24901 | gtgaaggtga  | taaggttaaa  | gcttacatac  | agactgttaa  | gcgctctgat  | gatggacgtc  |
| 24961 | aaattattct  | ttctaggact  | catgaaggct  | ttttggaggc  | attattaaat  | caagaaatac  |
| 25021 | cagaaattgc  | tgacggatta  | gtgacaatta  | aagggtatagc | tagagatgct  | ggttcaaggt  |
| 25081 | ctaaggttgc  | cgttttctct  | cccagacaaga | acattgatcc  | agtaggtgct  | tgtgttggag  |
| 25141 | ttaagggaga  | tagaataaaa  | actattatac  | acgaattaaa  | tggtgaaaaa  | attgacgtta  |
| 25201 | taaattactc  | ctcagatttg  | ggtcaatttg  | ttattaaagc  | cattactcct  | gcagaagtat  |
| 25261 | cgaaggttat  | tattgatgaa  | aatgaaaatt  | gcatagagtt  | aatagttgct  | gaagatcaat  |
| 25321 | tgagtttagc  | gataggaaaa  | aagggccaga  | atgtaagatt  | agcttcagag  | cttggtggat  |
| 25381 | ggaaaattga  | gatattaagc  | actcagcaag  | aatcagaaaag | gcgaagtaaa  | gaacttagtc  |
| 25441 | aatgttcagc  | tttatttgct  | gaagctttta  | acttagaaga  | gattatgggt  | cagctattgg  |
| 25501 | taacagaagg  | tttttcaagt  | gtagaagaca  | tatctagcgc  | ttcaattaaa  | gagcttgctt  |
| 25561 | caatagaggg  | ctttaatgaa  | gatattgcaa  | acgaacttca  | caatagagca  | aataagtacc  |
| 25621 | tgaaagcaga  | aaatgataga  | aaaatagaag  | agctaaaaaag | tttaggtatg  | gaggatgatg  |
| 25681 | taatcaattt  | aactttatca  | atagacaata  | aaattgctct  | tagtaagcat  | gatattaaga  |
| 25741 | ctttagagga  | catagcagat  | ttatcaagtt  | atgagttttg  | cagcatactc  | tcttcctcat  |
| 25801 | ccgatagcaa  | agaagatcta  | aaagatacag  | tagattcaat  | aatcatagaa  | gcacgtaaaa  |
| 25861 | agcttggtat  | aatataataa  | aataatatga  | ataatgaaga  | tatcagtgat  | aaaaaattaa  |
| 25921 | cgctccaagg  | tttaagcaag  | cttaaattag  | acctcaattt  | aaactcttca  | gctagcccaa  |
| 25981 | gtactggagc  | tacagtagta  | aaaaaaaagaa | gaaaaaaaatc | tcatgatgca  | gaagaacata  |
| 26041 | atthattttga | cgagagtaaa  | ttaggttctt  | taacagagaa  | agaacaaaatt | ttccgcatta  |
| 26101 | atgctgtgca  | gaatgctgct  | ttgctgaaag  | aaagaaaatca | gagagaagaa  | aaagagaaaa  |
| 26161 | cagcaaaaaga | agacagcaat  | aaagagattg  | acgagaaaaa  | tgaagcggac  | gctttatcta  |
| 26221 | aggaaataaa  | taagcaagtt  | ttaagtaata  | cccacttagt  | tgaacaaaaa  | gaagatagta  |
| 26281 | ttgaccatga  | ggacaacgat  | aaaaagtctt  | ttaaagtcaa  | caaagatata  | tattctaagc  |
| 26341 | attctaaact  | ggtaattgca  | caggcaatag  | atgaaaaaac  | tgaacaaccc  | cctgtattta  |
| 26401 | agcaaagggt  | tgggtataaga | ggtagaaaagt | caaagtttac  | taagggtaaa  | aatatatcaa  |
| 26461 | gagaagttat  | tataccagac  | aaaataacta  | tcaggggagt  | atctattcgc  | atggcagaag  |
| 26521 | atagcaagag  | tgtgctaaaa  | atgttcaaaag | agaagtcgg   | tgagagttat  | agagtagatg  |
| 26581 | atctggtgga  | tccagatata  | gcatgtgaaa  | tagtggaana  | atthaatcat  | acggctaaac  |
| 26641 | gagtgagcga  | taccaacaga  | gaaaaagatt  | tattttttat  | agaaggcaga  | gaaagcctgc  |
| 26701 | ctaaaaaacc  | taaaccacca  | atcgtcactt  | ttatgggaca  | cgtcgatcat  | ggtaaaacct  |
| 26761 | cattgctcga  | tgcatttcgt  | gaatctaattg | ttgcagaaaag | agagtcagggt | ggcataactc  |
| 26821 | aacacatagg  | tgcattatcaa | ataataacaa  | aagataagca  | aaaaattact  | ttcattgata  |
| 26881 | caccaggaca  | tgaagcggtt  | actgcgatgc  | gtgcatgtgg  | tgccaatatt  | actaatatag  |
| 26941 | ttgtaatagt  | agttgcagct  | gacgatggaa  | tcatgaaaca  | aacagttgaa  | gcaataaatc  |
| 27001 | atgcaaaaagc | agcaaatggt  | tctattatag  | ttgctatttaa | taaaattgat  | aaatctgagc  |

|       |             |             |             |             |             |             |
|-------|-------------|-------------|-------------|-------------|-------------|-------------|
| 27061 | ctggtgatgt  | ggagaaagta  | atgagtagct  | tacctcaata  | tgatctcatt  | cctgaagagc  |
| 27121 | ttggtggtga  | tgttatgatt  | gtgccagtat  | cagcaaaaaa  | gaaaactaat  | ttagataaac  |
| 27181 | tagaagagac  | gattttgtta  | atcgctgaat  | taatgaagct  | agaagcaata  | gaagattgtc  |
| 27241 | gagcacttgg  | atgggtaata  | gaatccaaaa  | tagataaagc  | gaaaggaata  | tcagctacat  |
| 27301 | tgatagttag  | ggaaggaacg  | ttaaagggtt  | gtgatatatt  | ggtagttggg  | acaacataca  |
| 27361 | gtaaagtacg  | tagtatgggt  | aatcaccttg  | gtcaaagaga  | aaaagcagca  | ctaccctccg  |
| 27421 | ctccaattga  | aattactggg  | ctaaatgggt  | taccaaatgc  | tggaagataa  | tttgttggtg  |
| 27481 | taaattctga  | aaagcaggcg  | cgtgaaattg  | ttgaatacag  | gctagagtta  | atcaagaaaa  |
| 27541 | agaaagaaga  | tttgggcgac  | aataatttag  | atatattcag  | tcgtaataac  | agcgaaacag  |
| 27601 | aagaactatc  | tgtagtttta  | aagtgcgatg  | taactggttc  | tattgaagca  | atatcaagtt  |
| 27661 | caattgataa  | actcggtaaa  | gaccaagtga  | aattaaatat  | cctacacaaa  | gcagtaggag  |
| 27721 | ggataacaga  | ttcagatgtg  | ctgcttgacg  | aagcatcaag  | tgcagtaatt  | ttagctttta  |
| 27781 | atgtaaaagt  | ggactcaaaa  | ataagggact  | tggaacaaac  | aaaagggtata | gaaatacata  |
| 27841 | cttataacat  | aatatacgag  | ctcattgacg  | acatgagaat  | gtattttaact | aaaatgttaa  |
| 27901 | agcctgttac  | acgagagggt  | cgtgttggtt  | ctgcatctgt  | aaggcaaata  | tttaatgtat  |
| 27961 | ctaaagctgg  | taatatcatt  | ggatgttatg  | taagtgatgg  | agtcataaaa  | aaagattcct  |
| 28021 | taattaaggt  | agtgcgtggg  | ggcaaatggg  | tgcattgaagg | aaagttaaaa  | gcaatacgta  |
| 28081 | gatttaaaga  | tgatgttaaa  | gaagtaggtg  | taaactttga  | atgcggagta  | tcactagagg  |
| 28141 | gtaatatcga  | tattaaagtt  | ggagatat    | tggaagctta  | tcaattagt   | caagaagaaa  |
| 28201 | gggtgttata  | gtagctggat  | atgaaaaagg  | aaattagaaa  | cctaaagata  | gcatcggtat  |
| 28261 | tgcatagagc  | aatatcaaga  | attctaattg  | aaggtaagg   | gttcaataaa  | aatgtagcgg  |
| 28321 | tatctgacgt  | aaaattaagt  | aaagatttga  | aaaaagcaga  | tgtatatatt  | gtgttatcct  |
| 28381 | cattgaatat  | tcaagtagct  | gactacttag  | atccagaaaa  | aagacgcact  | ggagatcctt  |
| 28441 | ctgagaataa  | ttgtgatctt  | aacaccgttg  | ttaatgaaat  | gaaccaatct  | gcatggtcaa  |
| 28501 | tacgtaaata  | tatactgtgt  | tatgttgatt  | tgcgatttat  | acctgaacta  | gttttcaagc  |
| 28561 | ctgacttagc  | gttcgataat  | tttgttaatg  | taagcaaaat  | attacataat  | cacacttaat  |
| 28621 | taatgcattt  | caatcgttac  | ttttcattaa  | tgagggtgca  | cagtttaacg  | ggtttgtggc  |
| 28681 | ttgtgctatt  | tcccagtttg  | agcggtat    | ttttagcctc  | aacttctcta  | tcgtatcagg  |
| 28741 | ttctttttct  | ccttgttttg  | tttactatag  | gtgcattttt  | aatgagaccc  | gcagggtgca  |
| 28801 | taatcaatga  | tatcttcgat  | agaaaaatag  | atgcgcacgt  | tgaacgaaca  | aaatataggc  |
| 28861 | cacttgcaag  | tggtgcatta  | aacataaagc  | aggcttttagc | tttactttca  | ctgctactgt  |
| 28921 | ctattgacct  | ggtaatctta  | ttattaacta  | ataaaaactac | acttataact  | ggaataatct  |
| 28981 | caatgtgtat  | gatagctact  | taccctttat  | taaagcggta  | tgtttggtgg  | ccacaattgt  |
| 29041 | tcttaggggt  | taccttcaat  | atgggatcgc  | tcatgggctc  | agcagcaata  | acaaaccaga  |
| 29101 | tcagtataga  | atccttgctg  | ttttatatag  | gatgcgtctt  | ttggacactt  | agctatgaca  |
| 29161 | ccatatacgc  | ccatcaagat  | aaaaaagatg  | atgaaaaact  | cgggatgaaa  | tctaccgcat  |
| 29221 | tatatatttg  | tgatacaaca  | aaatccttgg  | tgaaaagatt  | ttattttaata | tctcttatga  |
| 29281 | cgtggctata  | tgctgggtatt | ttatcatcat  | taaataacat  | tttttatatt  | gctctacttg  |
| 29341 | ccgtagggtt  | catatttcac  | cgccaatata  | aaaatttcaa  | tcctgacgat  | cccagtcaat  |
| 29401 | gcatgtccat  | atttaaaaaat | aattcctacg  | taggggttgct | tctctttttt  | ggcatccttt  |
| 29461 | tagatagaat  | tatcacctag  | gtctcaagag  | ttttggctct  | aatgaagtca  | ataaaactcag |
| 29521 | gtactcgcag  | aaacgaaaaat | tgcttgacac  | ccttcgccag  | ccctcttatc  | atgaaactga  |
| 29581 | agctattgta  | tttgcttttcg | ccaatctgca  | gattaaaagg  | taaggattac  | ttaatgtatc  |
| 29641 | ggcgtcttat  | gttcaatttt  | ttgcagtata  | tagatactgt  | atgtctttac  | aaaacttcat  |
| 29701 | ctacatctag  | atttttatct  | aaataagctg  | aacgcgctta  | taaagcgtta  | caagacatca  |
| 29761 | aaaaatgcc   | atactcgaca  | gagatagtaa  | aagactagct  | aactcgggga  | ttctttgtct  |
| 29821 | ttttttctgc  | ttagtaaat   | tcttaaacat  | ttgcagcgta  | ggttagttgc  | aattaaaagc  |
| 29881 | ggctgaatct  | cgcttgtaa   | gcgttttaaa  | cataaaaaaac | gccaatat    | ttaaagcggat |
| 29941 | aataacccca  | gggttcttt   | tgctttttt   | ttcatttggt  | aaatttctta  | atatttacag  |
| 30001 | ctaaacaaca  | accgtcatcc  | ctaagtatcc  | cgctgcttgt  | tagcggctga  | gataccgcga  |
| 30061 | atgaatcgcg  | gtatgacggg  | tcgcggcgag  | atgacgataa  | gctcgtcatc  | ccactacttg  |
| 30121 | ttagcggcta  | agagataaccg | cggcgggtata | gctataggat  | gacaaaaaaa  | gggcactgtg  |
| 30181 | acgaacttaa  | atcacaatta  | tcagttaatg  | ctaattacgg  | cattataaaa  | aacgccaaac  |
| 30241 | ttttttctgc  | ttttatgcaa  | gaagtctagt  | ccatatattc  | ctcccacttt  | tccgtgactt  |
| 30301 | ttcttactat  | ttcctcactc  | atctcaattt  | tctttcccca  | ctctcgtttg  | gtttcaggcg  |
| 30361 | ggatttttatt | tgtcgcatca  | aatcccattt  | tacctccaag  | tccactttca  | ggggaagcaa  |
| 30421 | agtctaaata  | atcaataggt  | gcatttttcta | tcatgattgt  | atcacgcaca  | gggtccatcc  |
| 30481 | tcgttgacat  | tgccacatc   | acttccttcc  | aatcacgtat  | atttatatca  | tcatcaacaa  |
| 30541 | cgataataaa  | cttcgtgtat  | aaaaattgct  | ttagaaagga  | aagtatgcc   | ataacaattc  |
| 30601 | tttttgccctg | ccctggatag  | gattttttta  | tcgacactac  | cgctattcta  | tatgagcaac  |

|       |             |             |             |             |             |             |
|-------|-------------|-------------|-------------|-------------|-------------|-------------|
| 30661 | cttccggtgg  | cagataaaaag | tccactatct  | ctggaaattg  | attgataaga  | atgggcacaa  |
| 30721 | aaattttcatt | gagtgcattca | ccaagaatcg  | atggttcatc  | aggtggcttg  | ccagtgaag   |
| 30781 | tgctaagata  | tatcgggttt  | ttacgcatag  | taattgcagt  | aatattaaat  | tcaggaaatt  |
| 30841 | gctcaacaga  | attatagtag  | ccggtgtgat  | ctccgtatgg  | cccttcgtct  | tgatatctat  |
| 30901 | ccaaactcac  | atagccttcc  | agaacgattt  | ccgcgtgagc  | tggtacttga  | agtggaatag  |
| 30961 | tcctacaatt  | taccagctca  | agcggcttct  | ttcgcagcag  | tccagcaaat  | tggtattctg  |
| 31021 | acaatgtttc  | tggcactgga  | gttactgcag  | caataatcgt  | tgcaggatca  | ctaccgatca  |
| 31081 | cagcagcagc  | aggaaatttc  | atattttgtt  | ccttctcttt  | ccatcgtttg  | tggtgagttg  |
| 31141 | cgccacctct  | ttgtgcaagc  | caacgcatta  | gtgttgtttt  | tttatctata  | acctgcatac  |
| 31201 | gatatattcc  | aagattaaaa  | ttatcttgct  | tttctttcgt  | gggtcctttt  | gttaccacaa  |
| 31261 | tcggccaggt  | gataagtggg  | gcaggttcat  | ttggccagca  | tgtttgaatg  | ggcagtagac  |
| 31321 | ttaggtccac  | ttcatctccg  | gttagcacta  | cctcttgaca  | tggagccttg  | ctcacgactt  |
| 31381 | tacttcgcat  | cgataacacg  | actttcaaca  | aaggaaacat  | ttttatagca  | tccttaaagt  |
| 31441 | tttttggcgg  | ctcaggtgat  | tgcaaaaatg  | ctaaaagttt  | accaagatct  | cttagttcat  |
| 31501 | caggatttat  | gttcaacccc  | aatgcaatcc  | tcttaatagt  | accaaataaa  | ttcaccaaaa  |
| 31561 | ctggaatcga  | atttttgcca  | ttttctgtga  | taacattttc  | aaaaatgata  | gctggccctt  |
| 31621 | tgcttgacaa  | aactctgcga  | tgaattttctg | tcattttcaag | aactggtgaa  | acttctctct  |
| 31681 | taatcctaata | cagatctttt  | ttttcttcta  | aggctttgat  | gaagtcgcgt  | aagttgttgt  |
| 31741 | acatatccca  | gtttttaaaa  | ttttaagttt  | atatctagtt  | ttcaagcact  | ttattgaaat  |
| 31801 | ttgacctatg  | cactgtctag  | cgagctttca  | gttaatttga  | gatcaaatct  | tcatatgtct  |
| 31861 | tactaagttt  | gtatttcctt  | cctctattgg  | aaaaatctac  | aatcttgata  | aaccccatth  |
| 31921 | ccaccacttt  | tttacaaggt  | tgcgcactag  | tacgaggctt  | aaaattaaat  | agttcgccaa  |
| 31981 | cctgactagc  | tgtaatagcg  | gaaaactcct  | ggaagagctc  | aagagctttg  | cgttgtttag  |
| 32041 | gatcaagttt  | acgtataaga  | tcagtctgat  | cagtgtggta  | ttcttcttca  | tttatacatt  |
| 32101 | gtaaaacggt  | ctcaaatgaa  | tttgccatac  | cttctacgaa  | atactccacc  | cacttagtga  |
| 32161 | tatctgcttc  | agctcgtccc  | atataataat  | tgtgcgatgg  | acctacactg  | attgcctcat  |
| 32221 | aataagctcc  | tagattctta  | gcataatatt  | cttccaatga  | ataaagccct  | tttaggtcat  |
| 32281 | atccaccaag  | gtgtaaaaat  | aatgtagtca  | acaatcttgc  | agtacgacca  | ttaccgtcat  |
| 32341 | agtaagggtg  | aattgttaca  | aattgataat  | gagcaatacc  | tgcaataaatt | gggcaaggca  |
| 32401 | cttgctcact  | gtcacgaatc  | caatcaatca  | tactgctcat  | gagctttggg  | acatcctttg  |
| 32461 | cttcaggggg  | catataaatt  | attgcacgtg  | tacggctatc  | acgaataacg  | ttttgaccat  |
| 32521 | cacgataaga  | ggtttggttc  | acttttagatt | ttccactcgc  | cattactagg  | gcatgaagcg  |
| 32581 | tttgaatggc  | tttctcagta  | atagggatcg  | ttctcgtctg  | ccattgtttca | acttgggtta  |
| 32641 | aagctgcata  | atataccttta | acctcattht  | catctctcct  | atatttttgg  | aagtggcttt  |
| 32701 | taccacttaa  | aacctcttca  | atctgttttag | gttcaagtcg  | atttccttca  | atcatagtag  |
| 32761 | aatagtgtgt  | ggtataaagc  | cgtgcagttt  | cacgaaggga  | cgagagcatc  | gatacagtga  |
| 32821 | gtggcaaagt  | taacacttht  | tcttttgctg  | cttcaatcct  | cataaggcaa  | ttagcaatth  |
| 32881 | tagaagtaat  | cgtataatth  | ggcatcggca  | taatatctgc  | attacattac  | ttctatatta  |
| 32941 | tgctgataaa  | atgcagataa  | tacaacatth  | acacgacgcc  | gaccataaac  | agcaataaat  |
| 33001 | tcggctgatt  | gagaaagaag  | tttgtcttgt  | agaatagcta  | tttctthtct  | tctgccaatt  |
| 33061 | attggttcac  | tcatatgtth  | attccgcgga  | gtttgttgaa  | attatacaca  | gcggaataaa  |
| 33121 | attatcaact  | ttgttttacc  | gccatgttht  | cagcgcggcg  | gtaaaagata  | gagcatctca  |
| 33181 | taattggcta  | ttctgggggt  | agtttggtca  | cctacattat  | caagtcttct  | gatgaactth  |
| 33241 | gtgacaatat  | acctaatcat  | tgtacgtaaa  | gtttgtattc  | gaggcaaaac  | tgactataaa  |
| 33301 | atacacttga  | tataaatgtt  | tttatatatt  | aacattagat  | gcttcttht   | atatatagat  |
| 33361 | aaatgtgtac  | taaaagttht  | atattgtagg  | ttctthtaata | agtatatgtc  | tagaatatcg  |
| 33421 | tttttattga  | ttcttatact  | ggcagtagca  | agttttaccag | taataaacaa  | ttggctthtca |
| 33481 | caccgcgggtc | aaaccctaac  | cgatgaccaa  | ataagtagca  | gattagatga  | ttatatcagt  |
| 33541 | agaaattht   | ataagatcgt  | aaaaactctc  | aaagaggagt  | cgattaaaag  | tagttacgct  |
| 33601 | gctcgagata  | acgcgactaa  | aggtaaaatt  | ttacagtaca  | aaaatgaaat  | attcgactcc  |
| 33661 | gcttatcctt  | actcaggaaa  | tgaaaatagt  | agtgttatag  | ctgtaggctt  | ctttgactat  |
| 33721 | tcttggtgat  | attgcaaaagc | tatgaagaat  | gatataaagc  | agttaattaa  | cgacggtaaa  |
| 33781 | attaagtata  | tcttttaggga | tgctccaata  | cttggtaatg  | actctthtaag | ggcagcaaaa  |
| 33841 | agcgttttag  | ctgttttact  | tattgataaa  | gaaaaatatt  | tcgattthtca | ctattctgct  |
| 33901 | ttaagtcaca  | aaggaggatt  | ttcagacgaa  | agcatattgg  | atatagtga   | aagcataggg  |
| 33961 | attgatgagg  | acgattthta  | tgattccata  | aaagataacg  | cggacaaaat  | tgagcaaatg  |
| 34021 | ataaacacaa  | gtaggcttct  | agtaagagat  | ttgggagtag  | gtggtacacc  | ttttthtaata |
| 34081 | attggggata  | gtctgtttgt  | aggagcaact  | gattthaaata | tactacgcaa  | aaaagtagat  |
| 34141 | gaattaagtc  | acaagcaagg  | ctagttthcaa | tttgccataa  | aattthtatt  | tttttgcttg  |
| 34201 | acaactcaaa  | tgaacctgag  | tatagcaact  | gtgggtgtga  | taagtaacgg  | cacgtagaag  |

|       |             |             |             |             |             |             |
|-------|-------------|-------------|-------------|-------------|-------------|-------------|
| 34261 | tgacacagta  | gctcaagaaa  | agcaggtgat  | gcctatagtc  | aagcataacc  | tcagcctgca  |
| 34321 | aagattgact  | aatccattaa  | aaagtgttaa  | actcaatata  | taattaccat  | tctggagtta  |
| 34381 | caatatgaaa  | gaacctaat   | atacaagaga  | accaattgct  | ctttttcgac  | aaatcaaaga  |
| 34441 | aaagaaaaaa  | tcaagtaatt  | tattgcataa  | tttaaagagt  | gcttatttcta | aaaaactaaa  |
| 34501 | gataggggct  | gctctaaaga  | caggggattg  | cttttttgac  | tccgtgggctc | aagggttgaa  |
| 34561 | tgagttaaaa  | cctgggtcatc | gttttaccgc  | aaaatcatta  | agaaaagatt  | gtgcagatta  |
| 34621 | tgctgaaaac  | aaaaaggact  | cacgatgggt  | ttttgatgaa  | ataacaaaaa  | atattgctga  |
| 34681 | aggatatgct  | gtacctatga  | taggttcaaa  | tggaaatgta  | atgaaagata  | accagaacaa  |
| 34741 | tattatacca  | gacaatattg  | catcttttga  | tagatattta  | aaagatatta  | gaagtatggc  |
| 34801 | tacagaagtt  | agcctaccta  | tatggggctg  | cccagggtt   | gaagggagaa  | tgatatgtga  |
| 34861 | taagtatgaa  | gtggagcttg  | atattttattc | aatagaggaa  | gatagtcaaa  | aagttacagt  |
| 34921 | aactaaaatt  | acagcacatg  | atgatgatct  | agaagttttt  | atacaagggtg | tgaatcttga  |
| 34981 | tcaattaaag  | atagataata  | gtaaaaaac   | tgtaggagta  | gtgaattaca  | tgcaacattt  |
| 35041 | tgtaccactc  | cttagtgga   | tttctgaaga  | tataaaagaa  | gatcaacaag  | tttctagtga  |
| 35101 | agcaattctt  | ggcacaggta  | aaagagttcc  | tacttctgat  | caatcagaga  | aagaagtaca  |
| 35161 | acaagaaata  | attaatatca  | gtactagtgc  | gactgtttat  | acggataaag  | aaatcccttt  |
| 35221 | ttctcatcaa  | ctagagcaaa  | aaacacgaca  | agaaggaatt  | aatgccagcg  | ctagtgcgac  |
| 35281 | tgttttatag  | gatagagaaa  | ttcctacttc  | taatcaatca  | gagcaaaaag  | tacaacaaga  |
| 35341 | aataattaat  | accaacacta  | gtgcgcgggt  | tttacaaatt  | tacacagata  | aaaaaatccc  |
| 35401 | ttcctctcat  | cagcaagaac  | aaaaaacaca  | acaaaaagaa  | atacaaaaaa  | aattaatcaa  |
| 35461 | tagttacagg  | aaagaggcta  | tttatgtaat  | agctactgta  | ataacagcta  | tagcattcac  |
| 35521 | agcatctgct  | atagctgcta  | tcattactca  | agcaattcct  | tttgcattgc  | ttgctggaac  |
| 35581 | tgcttttagtc | gctgcatgtg  | tttgtgtata  | tcaattaacg  | cagagtcata  | aagacattaa  |
| 35641 | cgaactgaaa  | agcgagttag  | gaaaaggcta  | agaagataat  | gcccacactt  | tcttagagaa  |
| 35701 | ggtgggatta  | aaaatgcacg  | atcttattaa  | taaagcaatt  | tcaaaagtgt  | aagatttttc  |
| 35761 | ctactttatc  | tacatcaact  | caactttatt  | tctacaggag  | ggtatatgtc  | attcacagaa  |
| 35821 | attagatttc  | cagaaaatat  | atcttatggg  | tccgctggag  | gaccggaatt  | ttccactgac  |
| 35881 | gttgtaacaa  | ctcataacgg  | ttgtgaacag  | cgcaacatca  | attgggtctca | tgcacgcact  |
| 35941 | agatacaaca  | tagcttacgg  | ggtcagatca  | aacgagcagc  | tactagaact  | aataacattt  |
| 36001 | tttcatgcac  | gaaaaggtaa  | agcaataggg  | tttcgtttta  | aggattgggtc | ggattttata  |
| 36061 | gccatcaacc  | aagagattgg  | tataggagat  | aacaaaaaaa  | cgacttttca  | gctaatacaa  |
| 36121 | acttatgtaa  | gtgggggaaga | taagcatata  | cgtatgatca  | aaaagccagt  | acatgggaca  |
| 36181 | gtaaagattt  | attttaaattg | taaagaagag  | agtgaatatt  | cagtaaatta  | ttcaacggga  |
| 36241 | gaaataacat  | tcatgaaacc  | gccagtaaaa  | gatgcaataa  | tactgcgag   | cttcgaattt  |
| 36301 | gatgtgccc   | tgcgctttga  | tacagattac  | ttaaacgctt  | ctattgatga  | ctatggaagc  |
| 36361 | aatagctgga  | ataacattcc  | actaatagag  | gtgaaatttt  | agctgtaagc  | gagcatagat  |
| 36421 | ctacatcata  | gtagggctac  | tagtcaccat  | caattaaaaa  | agttaagcac  | cactgaggct  |
| 36481 | ctatatttta  | atgagcctta  | gtatatgcaa  | ttatttttaa  | ctttatcacc  | agctatatac  |
| 36541 | tacaatgttg  | ctgagctttg  | ctaacatttt  | cacttgaagc  | ttggggagat  | tctagcttag  |
| 36601 | tgctttctcc  | ttcctgcaaa  | atagaaagct  | tcaacaattc  | cttttagagtt | gatttttgcaa |
| 36661 | gtgttgatc   | atctttgttt  | aagatgtagt  | ctagcatgtt  | gtttttctgt  | aagcgattaa  |
| 36721 | caaaatatct  | atcttcctca  | ttaagaacct  | ctatcttggt  | aatacaagat  | aataactaaat |
| 36781 | ccgaattctt  | tggttgctaaa | attccattca  | aaaagatatc  | taatttttgt  | ttgtcttcag  |
| 36841 | tcaagtctct  | agctaacct   | tttctgatgt  | tatcattatc  | aagcacagtg  | tactcgagggt |
| 36901 | acgagcaagg  | ctcaataagt  | ataaagtcct  | ctaaaggcac  | tagttctgga  | taggtgccag  |
| 36961 | cgtaatcaag  | tatgccacac  | tcagtaatac  | accctccttt  | tcttataaca  | cagcaattga  |
| 37021 | gacgaccatg  | atacattgat  | aacaaagaaa  | aaagacgtat  | tataacttgta | cctctatctt  |
| 37081 | tcatttctct  | gaaaagcttc  | ctatcattta  | ttaatgtgtg  | caaaatgtaa  | tccatagcag  |
| 37141 | gacctgggtt  | gcggaaatga  | aacatattat  | tctcttcaaa  | aatggcctca  | gctaattcga  |
| 37201 | tagatttttt  | atcctcatct  | acgaaagctt  | tttcatttct  | atttaactgt  | atgatctcag  |
| 37261 | ctttgctatc  | tctgcgtaga  | ccagttctcc  | ttattaacat  | ctcaaatatt  | tttgtattca  |
| 37321 | tatatatcct  | atattagtta  | aagtaaatat  | taataatgtt  | tactttttta  | ataaaaaata  |
| 37381 | atgaaaattt  | taataaaaaat | tatttttttt  | aatagaataa  | aaatctttta  | tatttgcttg  |
| 37441 | agtacaaaa   | gggctttatt  | ggtgtaatgc  | gttttctatt  | gcgcctgggt  | gcagcgctg   |
| 37501 | atgcaaccgg  | attcaagtgt  | cagctacttt  | tatagcacca  | cttctgcttc  | aataactgta  |
| 37561 | aatactaagc  | gatctgtctt  | aaaatctcct  | cttggttgctg | agcatggaca  | ctagcataac  |
| 37621 | cacatgcagg  | agatgcagca  | gcaggtctcg  | cgatacactt  | aggtcttttt  | gcttgaatat  |
| 37681 | cgagattgga  | caacacttct  | tctatcaatg  | ggttgacaaa  | aaaccatcct  | cccatatttt  |
| 37741 | ttggttcttc  | ttgacaccat  | ataatttcag  | cgtttttgta  | cttttcaagt  | tcattactta  |
| 37801 | gtttatctgc  | aggaaacgga  | tagaattggt  | ctaaacgtat  | cactgctata  | tcgtttattt  |

```

37861 tttgtgtttc aagcatttca attatatcgt aataaacttt accgctgcat attacaactt
37921 ttcgtacttt atcacttgaa actaaacctt ttctacattc tggaatcacc gtgaggaatt
37981 ttccttcaaa atcggatagg ttagaaactg ctcttttatg acgcagtagt gatttaggtg
38041 taaacactac taaaggcttg cgaaagtctc tatgcatttg tctgcgtaag acatggaagt
38101 aattcgccgg agtggaacaa ttaactacct gcataattatc ctctgcgcag agttgcaaaa
38161 atctctctat acgtgcgagg ctatgctcag gtccctgtcc ttcataacca tgaggcagca
38221 ataaaactag accgcttgat cgcaaccact ttgtttctgc agatgcgata aactggtcga
38281 tcataatttg tgcaccattt gcaaaatcac caaattgccc ttcccagagc accagtgaat
38341 acggggaatc aagactatat ccatattcaa agcccattac agcatactct gataaagcgc
38401 tatctatgac ctcaaagtga gcttgctttt catttatatt gtttagcgga ataaacgctt
38461 cttctgttac ctgatcaaca agccttgaat gacggtgcga gaaagttcca cgaccagagt
38521 cttgtcctga taaacgcact cctattcctt ctgtgagcag tgatgcaaac gcaagacttt
38581 cggcagttgc ccagtctata ttactaccgg aatttatgct gtctattctg ccatcaagta
38641 tttttctaac cttattgtta atattaaagc tacttgggat gttgctattt atatgtacac
38701 ctaatttttt caactcatct ggcggaacac cagaatccgt gtagtattcg ctcaaactcg
38761 tcaactttgc tcttcttaat tttgaccaca ctccaccgaa ccagtcagct ttttttgag
38821 tataagccgc tgatt

```

//

```

LOCUS      JAQZAU010000050          3095 bp    dna        linear    ENV 17-MAR-2023
DEFINITION MAG: Wolbachia pipientis isolate wEsol contig_33195, whole genome
            shotgun sequence.
ACCESSION  JAQZAU010000050  JAQZAU010000000
VERSION    JAQZAU010000050.1
DBLINK     BioProject: PRJNA929258
            BioSample: SAMN33142973
KEYWORDS   WGS; ENV; Metagenome Assembled Genome; MAG.
SOURCE     Wolbachia pipientis (insect metagenome)
ORGANISM   Wolbachia pipientis
            Bacteria; Pseudomonadota; Alphaproteobacteria; Rickettsiales;
            Anaplasmataceae; Wolbachieae; Wolbachia.
REFERENCE  1  (bases 1 to 3095)
AUTHORS    Fiutek,N., Couger,B.M., Roy,S., de la Torre,J.R. and Connor,E.F.
TITLE      Genomic assessment of the contribution of the Wolbachia
            endosymbiont of Eurosta solidaginis to gall-induction
JOURNAL    International Journal Molecular Sciences
REFERENCE  2  (bases 1 to 3095)
AUTHORS    Fiutek,N., Couger,B.M., Roy,S., de la Torre,J.R. and Connor,E.F.
TITLE      Direct Submission
JOURNAL    Submitted (10-FEB-2023) Biology, San Francisco State University,
            1600 Holloway Ave, San Francisco, CA 94132, USA
COMMENT    ##Genome-Assembly-Data-START##
            Assembly Date          :: JUN-2019
            Assembly Method        :: FLYE v. 06-2019
            Genome Representation   :: Full
            Expected Final Version  :: Yes
            Genome Coverage         :: 100.0x
            Sequencing Technology   :: Illumina HiSeq; PacBio Sequel
            ##Genome-Assembly-Data-END##
FEATURES   Location/Qualifiers
            source                  1..3095
                                     /organism="Wolbachia pipientis"
                                     /mol_type="genomic DNA"
                                     /submitter_seqid="contig_33195"
                                     /isolate="wEsol"
                                     /isolation_source="galls on Solidago altissima"
                                     /host="Eurosta solidaginis MN-2018-EFC"
                                     /db_xref="taxon:955"
                                     /environmental_sample
                                     /country="USA: Cowling Arboretum, Carleton College,
                                     Northfield, MN"

```

```

/lat_lon="44.48 N 93.13 W"
/altitude="280 m"
/collection_date="2018-11"
/metagenome_source="insect metagenome"
/note="metagenomic"
gene 300..614
/locus_tag="wEsol_00481"
CDS 300..614
/locus_tag="wEsol_00481"
/codon_start=1
/transl_table=11
/product="hypothetical protein"
/pfam="PDDEXK_2"
/tigr="TIGR01784 T_den_put_tspse 273 conserved
hypothetical protein"
/translation="MALSKFLDPKLDLTFKRIFGTEKNKNILIHFLNDILGFTEINTI
QEVEFLSTIMDPEIASDKQSIVDVLCDSSGARYVIEMQLTRDKGF EKRAQLYAAKAY
SR"
/besthit="qcoverage 100 , hcoverage 70.2702702702703 ,
similarity 100 , identity 99.0 , evaluate 7.24e-65 ,
alnlength 104 , Bacteria , Proteobacteria ,
WP_174516951.1 Rpn family recombination-promoting
nuclease/putative transposase, partial [Wolbachia
endosymbiont of Cardiocondyla obscurior]"
gene 825..1232
/locus_tag="wEsol_00482"
CDS 825..1232
/locus_tag="wEsol_00482"
/codon_start=1
/transl_table=11
/product="hypothetical protein"
/pfam="PDDEXK_2 Pfam-B_9730 Pfam-B_12519 Pfam-B_10245"
/tigr="TIGR01784 T_den_put_tspse 273 conserved
hypothetical protein"
/translation="MDRWLFFFKYADETTEEDLRKIAEKAPIIKLAYDELDRFSWNEK
DLVAYEERIMDLRKEEAILEYRLDLATEKGKKIGKEEGKIEGKIEGKIEVAKAMLANN
VDVNTIVKFTGLSISEIEELSVNGYPYVIPRR"
/besthit="qcoverage 100 , hcoverage 43.5483870967742 ,
similarity 100 , identity 99.3 , evaluate 4.11e-72 ,
alnlength 135 , Bacteria , Proteobacteria ,
WP_197907250.1 Rpn family recombination-promoting
nuclease/putative transposase [Wolbachia endosymbiont of
Kradibia gibbosae]"
gene complement(1233..2273)
/locus_tag="wEsol_00483"
CDS complement(1233..2273)
/locus_tag="wEsol_00483"
/codon_start=1
/transl_table=11
/fullproduct="qcoverage 100 , hcoverage 100 , similarity
100 , identity 100 , evaluate 3.11e-244 , alnlength 346 ,
Bacteria , Proteobacteria , WP_015588818.1 MULTISPECIES:
Mrp/NBP35 family ATP-binding protein [unclassified
Wolbachia]"
/cog="Mrp COG0489 265 ATPases involved in chromosome
partitioning"
/pfam="DUF59 Pfam-B_235 Pfam-B_2460 Pfam-B_3718 AAA_31
VirC1 MipZ Pfam-B_2271 Pfam-B_4013 CbiA ArsA_ATPase SRP54
Fer4_NifH ParA"
/product="Mrp/NBP35 family ATP-binding protein"

```

```

/translation="MINEKIVRENLKKVIEQKSGKDVIALLGISSIIIKGQDVGVFVLE
VAGNTQANEELRRNCEQAVKAIPGVTKVTTVATCQKQTGQQAKLHIEGVKNIIVVAS
GKGGVGKSTVALNLALSALAKLKHKVALVDADIYGPSIPKMLGAEKLKPEIQDSKAMPI
EKYGLHTISIGYFIDKDRAAIWRGPMITKALYSLLMGTKWSDIEYLIIDTPPGTGDVH
LSLMENFNLTGAIIVSTPQELSLIDARKIYDMFTKLSVPVIGIVENMSYFIQSGSKIY
IFGKDGAKKMSEELGIKLLGRVPLDPQICHASDCGNPLMLSEDLAGIYEGIAKDVIK
VALQFEKPSFRY"
/besthit="qcoverage 100 , hcoverage 100 , similarity 100
, identity 100 , evalue 3.11e-244 , alnlength 346 ,
Bacteria , Proteobacteria , WP_015588818.1 MULTISPECIES:
Mrp/NBP35 family ATP-binding protein [unclassified
Wolbachia]"
gene complement(2281..2691)
/locus_tag="wEsol_00484"
CDS complement(2281..2691)
/locus_tag="wEsol_00484"
/codon_start=1
/transl_table=11
/fullproduct="qcoverage 100 , hcoverage 100 , similarity
99.3 , identity 99.3 , evalue 4.37e-81 , alnlength 136 ,
Bacteria , Proteobacteria , WP_174517022.1 MULTISPECIES:
hypothetical protein [unclassified Wolbachia]"
/pfam="PDDEXK_2 Pfam-B_5253"
/tigr="TIGR01784 T_den_put_tspse 273 conserved
hypothetical protein"
/product="hypothetical protein"
/translation="MKSTKLESRMRLKVSRTVLKSSEEGRPSSLRQQYADETTEEDL
RKIAEKAPIIKLVYDELDRFSWNEKDLVAYEERIMDLLKEEGILAKKLDEGKIEGKIE
VAKNLLKADISIDIISQTTGLPQAEIKRLQEEIT"
/besthit="qcoverage 100 , hcoverage 100 , similarity 99.3
, identity 99.3 , evalue 4.37e-81 , alnlength 136 ,
Bacteria , Proteobacteria , WP_174517022.1 MULTISPECIES:
hypothetical protein [unclassified Wolbachia]"
gene complement(2688..2963)
/locus_tag="wEsol_00485"
CDS complement(2688..2963)
/locus_tag="wEsol_00485"
/codon_start=1
/transl_table=11
/pfam="HNH HNH_3"
/fullproduct="qcoverage 100 , hcoverage 100 , similarity
100 , identity 100 , evalue 2.74e-65 , alnlength 91 ,
Bacteria , Proteobacteria , WP_039963646.1 MULTISPECIES:
HNH endonuclease [unclassified Wolbachia]"
/translation="MLLNKVQKTRSPYDGDWVYWGKRLRKIPDKPLGVIKLLRLHQSK
CDNCRLWFKSDDTIKIHKQDQNRNRMITNLSLLHGHCHDELHRRCA"
/product="HNH endonuclease"
/besthit="qcoverage 100 , hcoverage 100 , similarity 100
, identity 100 , evalue 2.74e-65 , alnlength 91 ,
Bacteria , Proteobacteria , WP_039963646.1 MULTISPECIES:
HNH endonuclease [unclassified Wolbachia]"
gene complement(2923..>3095)
/locus_tag="wEsol_00486"
CDS complement(2923..>3095)
/locus_tag="wEsol_00486"
/codon_start=1
/transl_table=11
/product="hypothetical protein"
/translation=""

```

ORIGIN

```

1 tttatagaca aagacctata gctaacccaa gaaagggttggt aaccagactg cattctgtga
61 ttttttagcaa aacacgatct ttcatttgat ctttcttcaa tttaaagtaa atacagaaaa
121 ttgctgccta tagctaaact gacttagatt taccgacaac cgtcatcccc ctacttgta
181 gcggtctaaga gataccgcgg cggtatgacg gttcgcggcg gcatagctat cttcaaaaat
241 atggttgaat aattgttaat aatagtgtat aattattaat atttttaagc actttggcta
301 tggctttatc taagtttctc gaccctaagc tggatttaac ctttaaaaga atctttggca
361 ctgaaaaaaaa taagaatatt ctcatacatt ttttgaatga tatttttaggg tttaccgaga
421 taaatactat acaagaagtg gaattcctca gtactataat ggatcctgaa attgcctctg
481 ataagcaaag tatagttgat gttctttgca gggactctag tggggctagg tatgtgattg
541 aaatgcagct cactcgcgat aaaggcttcg aaaaacgagc tcaactatat gctgctaagg
601 cttactcaag gtaagctgat aaatctggta agtacattga tttaaagaag gttttcttta
661 ttgctatttc taattgtaat ttatttcctg ataagcttga ttatatatcc agccacacta
721 taagagatga gaaaaccaat gagcatgact taaaagattt tcaatttata tttattgaac
781 tacctaaatt tcctaagaat aaggaagaac agctagaaag catagtggat cgttggttat
841 ttttcttcaa atatgcagat gaaactacgg aagaagactt aaggaaaata gcagaaaaag
901 caccaataat aaagttagcc tacgatgaat tagacagggt tagctggaat gaaaaagatt
961 tagtagctta cgaagaaaga ataatggatc tacggaaaga agaagccatt cttgaataca
1021 gacttgatct tgctactgaa aaaggcaaaa aaattggtaa agaggaaggc aaaattgaag
1081 gcaaaattga agggaaaatc gaagtcgcaa aagcaatgct ggctaataat gttgatgta
1141 acactattgt caagtttact ggcctttcta ttagtgagat tgaagaatta agtgtgaacg
1201 gttaccacct cgtcataacc cgcgcgcgct aactagtagc ggaatgacgg tttttcaaat
1261 tgtagagcca ctttagctat aacatcttta gcaatacctt cataaatccc tgctaaatct
1321 tcacttaaca tttaaaggatt tccacaatca gaagcatggc atatttgtgg atctagagga
1381 actctgccta gaagtttgat gccagctcc tcagacattt tttttgcacc gtcttttcca
1441 aatatgtata tttttgagcc gctttgaatg aaataactca tattttctac aatgccaata
1501 accggtacgc tgagctttgt aaacatatca taaattttgc gagcatcgat taaagagagc
1561 tcctgtggag ttgaaactat tatcgcccca gttaagttaa aattttccat aagacttaaa
1621 tgcacatcgc cagttccagg tgggtgatca attatcaaat actctatatc ggaccatttt
1681 gttcccatca gcagactata aagtgccttt gtaatcatag gtccgcgcca tattgctgca
1741 cgatctttat cgataaaaata gccaatgaa atagtatgca gtccatactt ttctataggc
1801 attgctttac tatcctgtat ttctggcttt aatttttcag cgccaagcat ttttaggaatt
1861 gaaggaccat atatatctgc atcaaccagc gcaactttgt gttttaactt tgctaattgag
1921 agagcaagat ttagcgcaac tgtggacttg cccacaccgc ctttaccaga ggccacaacg
1981 attatatttt tcactccttc gatatgtaat ttagcttttt gttgcccagt ttgtttttga
2041 caagtagcaa ccacggtcac ttttgtcacc cccggtatag ctttaacagc ttgctcacia
2101 tttcttctta attcttcatt tgcttgctgt ttaccggcaa cttcaagcac aaaaccaaca
2161 tcttgacctt taataataat tgaggatatt atgccaagag cgatcacatc tttaccgctt
2221 ttttgctcta tgactttttt taagttctct cttacaattt tttcgttgat cattagcctt
2281 ttaggtgatt tcttcctgaa gtcgtttaat ctgagcttga ggaaggccgg ttgtctgaga
2341 gataatatca atagagatgt cagccttaag taggtttttt gctacttcaa tctttccttc
2401 aatctttccc tcatcaagtt ttttagcgag gatgccttct tctttcagca gatccattat
2461 tctttcttca tatgctacta aatctttttc attccagcta aacctgtcta attcatcgta
2521 gactaacttt attattggtg ctttttctgc tattttcctt aagtcttctt ccgtagtttc
2581 atctgcatat tgttgtctaa gtgaagaagg tcgcccctcc tcactcgact tcaaaaccgt
2641 acgtgagact ttgagcctca tacggcttct ctctaatttg gtgcttttca tgcacacctc
2701 ctgtgtaatt catcgtgaca atgtccatgt aacaaagata agtttgtgat catattgttt
2761 cgtctattct ggtctttgtg atgtattttt attgtatcat cactttttaa ccatagtcta
2821 caattatcgc atttactttg gtgcaacctc aataatttta ttactcctag tggcttatct
2881 ggtatttttc tcagacgttt accccaatat acccaatcac catcatatgg ggatctggtt
2941 ttttgcaact tgtttaataa catgatcgct gtgtatagta agacgtacct tgttacttgt
3001 cataaagcgc cagttttcgt tattatactt cttaaagtac tttcttttta tccagcattt
3061 ccctttgttt ggggtgcctaa agactgacct taccc

```

//

```

LOCUS      JAQZAU010000051      34015 bp      dna      linear      ENV 17-MAR-2023
DEFINITION MAG: Wolbachia pipientis isolate wEsol contig_33339, whole genome
            shotgun sequence.
ACCESSION  JAQZAU010000051 JAQZAU010000000
VERSION    JAQZAU010000051.1
DBLINK     BioProject: PRJNA929258
            BioSample: SAMN33142973

```

KEYWORDS WGS; ENV; Metagenome Assembled Genome; MAG.  
 SOURCE Wolbachia pipientis (insect metagenome)  
 ORGANISM Wolbachia pipientis  
 Bacteria; Pseudomonadota; Alphaproteobacteria; Rickettsiales;  
 Anaplasmataceae; Wolbachieae; Wolbachia.  
 REFERENCE 1 (bases 1 to 34015)  
 AUTHORS Fiutek,N., Couger,B.M., Roy,S., de la Torre,J.R. and Connor,E.F.  
 TITLE Genomic assessment of the contribution of the Wolbachia  
 endosymbiont of Eurosta solidaginis to gall-induction  
 JOURNAL International Journal Molecular Sciences  
 REFERENCE 2 (bases 1 to 34015)  
 AUTHORS Fiutek,N., Couger,B.M., Roy,S., de la Torre,J.R. and Connor,E.F.  
 TITLE Direct Submission  
 JOURNAL Submitted (10-FEB-2023) Biology, San Francisco State University,  
 1600 Holloway Ave, San Francisco, CA 94132, USA  
 COMMENT ##Genome-Assembly-Data-START##  
 Assembly Date :: JUN-2019  
 Assembly Method :: FLYE v. 06-2019  
 Genome Representation :: Full  
 Expected Final Version :: Yes  
 Genome Coverage :: 100.0x  
 Sequencing Technology :: Illumina HiSeq; PacBio Sequel  
 ##Genome-Assembly-Data-END##  
 FEATURES Location/Qualifiers  
 source 1..34015  
 /organism="Wolbachia pipientis"  
 /mol\_type="genomic DNA"  
 /submitter\_seqid="contig\_33339"  
 /isolate="wEsol"  
 /isolation\_source="galls on Solidago altissima"  
 /host="Eurosta solidaginis MN-2018-EFC"  
 /db\_xref="taxon:955"  
 /environmental\_sample  
 /country="USA: Cowling Arboretum, Carleton College,  
 Northfield, MN"  
 /lat\_lon="44.48 N 93.13 W"  
 /altitude="280 m"  
 /collection\_date="2018-11"  
 /metagenome\_source="insect metagenome"  
 /note="metagenomic"  
 gene 526..2079  
 /locus\_tag="wEsol\_00487"  
 CDS 526..2079  
 /locus\_tag="wEsol\_00487"  
 /codon\_start=1  
 /transl\_table=11  
 /fullproduct="qcoverage 100 , hcoverage 100 , similarity  
 100 , identity 100 , eval 0.0 , alnlength 517 ,  
 Bacteria , Proteobacteria , WP\_015589241.1 MULTISPECIES:  
 UDP-N-acetylmuramoylalanine--D-glutamate ligase  
 [unclassified Wolbachia]"  
 /cog="MurD COG0771 448  
 UDP-N-acetylmuramoylalanine-D-glutamate ligase"  
 /pfam="ELFV\_dehydrog 2-Hacid\_dh\_C ArgK Mur\_ligase\_M  
 Mur\_ligase\_C"  
 /product="UDP-N-acetylmuramoylalanine--D-glutamate ligase"  
 /translation="MVRISYLAVQLNKYKNQNVAVFGLGKTGLSAINALTKSGARIYA  
 WDDHEEQIANTKMMYKKCNFIHPKEYNWEHISALVLSPGVPTPEHWIVKLARRFDCKI  
 KSDIELFLEAKTTNQKVIGVTGTNGKSTTSLIGHILKSAGKKVAIGGNLGVPLDLE

```

RDAEIYVIELSSFQLELMNEINVDISALLNITPDHIDRHGSMENYIATKCLKLINGSEV
AVIGCDNEITADIFNKFTGDKIPISVTYSPMSFQRTLESRKEKPLPTTQMTEGGARD
LISLAGNNLLDYSEQITGIDRNYLDPSVSYLDDKRGTGIQKISLKLENHSLSVSDVKI
NLISNAENIAATYAVCKVLGVDSNTIINGIKSFSGLRHRNELLGKIRNVFFVNDKAT
NAKSSEKAILS YENINWIAGGRSKKGGIESLSKHFTVRVKAFLIGESTEAFANVMENK
VDYVKCCNLEDAFRLAFEEALNSAEV TILLS PACASFDQWKNFEERGEAFCRMFENL
RYNHTCCLV"
/blasthit="qcoverage 100 , hcoverage 100 , similarity 100
, identity 100 , evalue 0.0 , alnlength 517 , Bacteria ,
Proteobacteria , WP_015589241.1 MULTISPECIES:
UDP-N-acetylmuramoylalanine--D-glutamate ligase
[unclassified Wolbachia]"
gene 2086..2676
/locus_tag="wEsol_00488"
CDS 2086..2676
/locus_tag="wEsol_00488"
/codon_start=1
/transl_table=11
/fullproduct="qcoverage 100 , hcoverage 100 , similarity
100 , identity 100 , evalue 2.10e-133 , alnlength 196 ,
Bacteria , Proteobacteria , WP_010082414.1 MULTISPECIES:
COQ9 family protein [Wolbachia]"
/cog="COG5590 COG5590 229 Uncharacterized conserved
protein"
/pfam="Pfam-B_17210 COQ9"
/tigr="TIGR02396 diverge_rpsU 186 rpsU-divergently
transcribed protein"
/product="COQ9 family
protein"
/translation="MEQKLIIDKLIRVIPFEGISDETLLKVCTDLNLANSFCKFQNGI
YSALEHIAEDLNSSMEAELRNSNLED MKVRERVKLAIQIHLSNYAKLPNYRELLKNVL
SFSVSPKNTYFSSKLLYRTISAIWYGIHDQSTDFNYTKRAILAGVYLSTILFFINDY
SEDFVDTL SFLDNRINNVMTFQKFKTRLKGIIGNFL"
/blasthit="qcoverage 100 , hcoverage 100 , similarity 100
, identity 100 , evalue 2.10e-133 , alnlength 196 ,
Bacteria , Proteobacteria , WP_010082414.1 MULTISPECIES:
COQ9 family protein [Wolbachia]"
gene 2681..3013
/locus_tag="wEsol_00489"
CDS 2681..3013
/locus_tag="wEsol_00489"
/codon_start=1
/transl_table=11
/fullproduct="qcoverage 100 , hcoverage 100 , similarity
100 , identity 100 , evalue 1.06e-71 , alnlength 110 ,
Bacteria , Proteobacteria , WP_006279274.1 MULTISPECIES:
hypothetical protein [Wolbachia]"
/translation="MIVGRKVL EHDPEKVCENKNIHADHKEHLVYREDNNGTTKYTSY
EEKENKFIEEAHEY LIDSEFNKNFDLGQYRISNFSGNLTKIELELINEKYMQVQV NRE
RKIILAIP"
/product="hypothetical protein"
/blasthit="qcoverage 100 , hcoverage 100 , similarity 100
, identity 100 , evalue 1.06e-71 , alnlength 110 ,
Bacteria , Proteobacteria , WP_006279274.1 MULTISPECIES:
hypothetical protein [Wolbachia]"
gene complement(2971..3519)
/locus_tag="wEsol_00490"
CDS complement(2971..3519)
/locus_tag="wEsol_00490"
/codon_start=1

```

```

/transl_table=11
/fullproduct="qcoverage 100 , hcoverage 100 , similarity
100 , identity 100 , evalue 1.06e-126 , alnlength 182 ,
Bacteria , Proteobacteria , WP_141457227.1 MULTISPECIES:
16S rRNA (guanine(966)-N(2))-methyltransferase RsmD
[unclassified Wolbachia]"
/cog="COG0742 COG0742 187 N6-adenine-specific methylase"
/pfam="Cons_hypoth95 MethyltransfD12 Ubie_methyltran MTS
Methyltransf_31 Methyltransf_18 Pfam-B_47 Methyltransf_26
UPF0020 PrmA Methyltransf_15 Methyltransf_25
MethyltransfD12"
/tigr="TIGR00095 TIGR00095 194 RNA methyltransferase,
RsmD family"
/product="16S rRNA
(guanine(966)-N(2))-methyltransferase RsmD"
/translation="MLRIIAGKYRGRKITTGKHLAARPTMSIVREAI FNM LSSRKPIY
NLNVLDLFCGSGSFSFEALSRGAKHAFMVDS DYNLQLPKKTAEDFGITDNVTLICCS
ANCLPQPISKCDIVFIDPPYNSNLVESTLNGLAHSGWLSDDALIILEIRKNEDFECNK
NFSIILERTYGIARIIFLSLLT"
/besthit="qcoverage 100 , hcoverage 100 , similarity 100
, identity 100 , evalue 1.06e-126 , alnlength 182 ,
Bacteria , Proteobacteria , WP_141457227.1 MULTISPECIES:
16S rRNA (guanine(966)-N(2))-methyltransferase RsmD
[unclassified Wolbachia]"
gene complement(3642..4304)
/locus_tag="wEsol_00491"
CDS complement(3642..4304)
/locus_tag="wEsol_00491"
/codon_start=1
/transl_table=11
/fullproduct="qcoverage 100 , hcoverage 100 , similarity
100 , identity 100 , evalue 3.39e-144 , alnlength 220 ,
Bacteria , Proteobacteria , CDR79215.1 hypothetical
protein WPAU_0843 [Wolbachia endosymbiont of Drosophila
simulans wAu]"
/translation="MQKEMRRGLKMKTNKNFKGLDYYKLQQDKDGNIKLNDYDDILNA
RRARVDLLRDNTSLDKDVNF AKLNKALSEKFVDNHSLLSEFDKEDKEIVQERIKVFSI
LESLEDLKS VKSEDLLEVSLLLSDLSFIERNVVLNTDQNSDLAGFKNLFIEKKASGEE
YSEEECRGFLDNIDKINTIIKLELESRIEGLNHDEKNDHDDLQDEIGQAINAAGKSEK
DN"
/product="hypothetical protein"
/besthit="qcoverage 100 , hcoverage 100 , similarity 100
, identity 100 , evalue 3.39e-144 , alnlength 220 ,
Bacteria , Proteobacteria , CDR79215.1 hypothetical
protein WPAU_0843 [Wolbachia endosymbiont of Drosophila
simulans wAu]"
gene complement(4264..7824)
/locus_tag="wEsol_00492"
CDS complement(4264..7824)
/locus_tag="wEsol_00492"
/codon_start=1
/transl_table=11
/pfam="TrbL"
/fullproduct="qcoverage 100 , hcoverage 100 , similarity
100 , identity 99.9 , evalue 0.0 , alnlength 1186 ,
Bacteria , Proteobacteria , WP_015589245.1 MULTISPECIES:
type IV secretion system protein [unclassified
Wolbachia]"
/translation="MQSRLGKCWFRVLLLAAYVLITGCSKNDMPFPRCISADYFGPKP
IAVSAHFSSDHD AFIPGDGEVVD PETGEIN YGFHHNQVVEWEDTGLE TNGDSLKV RVN

```

gene

CDS

GAWTSWSNNKESKKGSYTLQSLEQLKYATKFEGKSGDNSLPDFHLVCNDYKPSAPQ  
KISSKSNASCTVKCKCINEDDSANTVSRGAPCWFTNGHGAYLLFQRPGDDSPNKDLKS  
MRNPSSPTVHLGYNSVAENGSGLFALDRDSTKLKDRNCDPVKLKKGWKIYVKILDRYY  
LDNVGGYSFEFLSGVRQPSGVEFFDYIYNYLKCVLLINENCKEHFNSNDPAVAQAMFE  
NIAEKSTSFHNFVLSLLVLFVMISSLLYLFGLIIQETKHDMLIRMMKITLVIVLISPGS  
FRFFYDHFLVLFVKGLEQLISIIITNFAPNMNTGSIVQGDEAKLFSFMEFMFNKFFAYS  
VWKKFAAFLHYQMWASLLMIPAIFIGIVLYFLLCLYAYIIFLSGFMGIAFLIAIMPLF  
LISILFSPLKSLFEGWIKFCISFCLQSIMIFALLSLLASIIMNTFYRQLGFTVCYNKW  
FEVKLCAPKWVFGGFCIVDKQYFGWTPGQIFVPYTLGEASPLNVDKNIEGIEKISREG  
GTIKFTGGAGYIPLPPDYIEKGFYIDYPPFNPIPGTKENPADHYIAESDMVVDNSCS  
VKDLVRLTNSLSHASEKADILLINNISKKTEIYCKQPGNESRCTNYKEIIEKVILQP  
SLKSEIKSLVQDIIRQDGSCQSQNFYKVNRYQENSQYQVQDIQRGYLINAGEIFVL  
FLLSFLMFSLREFVQQMGSSIAGGGFSVYNISSMYQASPLTGIMEEFKQQWQNFAGRG  
LESLSWATHLPDRLAGGAANLLGRVPRVGGVLKYAIDVPRKFVGATIEATKFATSPK  
NDVDKLEEKIYRAFGVDKEDITHRRIGKYLDYYKGYVGSLSLGYTIEDAMKFTWEHGLD  
SIGVSRRTGEKDGYPNNLLFRAKSHRQDFLNKLHDDTIGRKREPEKDNPDQSNKVERE  
LGTELVRDNHDQPLEEGDPLRLRGGGQPDKVVRELSTEQEDKPNQLQHDQPTTEEDKPD  
QSNEVTRNLGTEPKGSDEIDDFGSAFEGMEKRAEREGRRNQDKVYNLSPLFEMNTPEA  
VEKRAEREEKRNREDSKRKLPEPMRKPDAGDEKRIEDED"  
/product="type IV secretion  
system protein"  
/besthit="qcoverage 100 , hcoverage 100 , similarity 100  
 , identity 99.9 , evalue 0.0 , alnlength 1186 , Bacteria  
 , Proteobacteria , WP\_015589245.1 MULTISPECIES: type IV  
secretion system protein [unclassified Wolbachia]"  
complement(7914..10859)  
/locus\_tag="wEsol\_00493"  
complement(7914..10859)  
/locus\_tag="wEsol\_00493"  
/codon\_start=1  
/transl\_table=11  
/pfam="TrbL"  
/fullproduct="qcoverage 100 , hcoverage 100 , similarity  
100 , identity 100 , evalue 0.0 , alnlength 981 ,  
Bacteria , Proteobacteria , WP\_174516844.1 MULTISPECIES:  
type IV secretion system protein [unclassified  
Wolbachia]"  
/translation="MISKRSLLLILCLAITGCNMDCVEPGLQSKNTSVNVDVPVRKAD  
KIHVVDSGQVISQGEKIKFTLDGSVNFCPPFKEDKNPRKVLVPASFCADGSEPNYSKAA  
DINSVPNNYGVNESKNELCGGKGFSGNRRYVDTGIKVNPGDKLSFSLVPRKITIDYDN  
PEGKGINFDDNCYKAVENDRKETVYKKATVSEVHQGGEFFCDGKDGTKNKIQLPLDK  
TKAKESKVLVGNGYTPYDNKVHFNGKYIQDNEPWVYGSLLDLRRAKIGLNELCDGKNC  
SLDERKKYSSYELNCYHQNICYTEKGIWNYGLGQAGERNVSSIRYKKYDKGNKCDMY  
SYLEKMEGNVKAGSFTEDDKSWAEALVAKIGDPDDKNIAKGIQCLPKKEGAKGDNMCL  
QIGDNNKFEDFSLELNNDYPVNDEVTPGSSVMLAIADYGHYYNRRGGYHVKVTRSCY  
INGEKLYVYLGDEPPKDLHGVTNDFKVVGVREVRVNGKDEYTILDVISGEHFQNEESK  
KIYFGINVSINVERDDITDKNGKYENNKYTVTLFVVRKINDFISSNVNGVFKLKEEV  
IGDSVKDSYKGYARGLLQGVRALLTLYVIFTVVGMYMLGTIQLSKFDFIVRMFKIAFIA  
FAFSDRSWELFGTTLSRLFIDGSTYLVDSFSGYVGEGERKFAFLDLTAGVLFTAETWL  
KFLSLMLSGPFGVIAFLAILCATYAFLKCIISATLKYVISTVLVAFLLSLTPLFIVFI  
LFQKTKPLFDNWIKTLAHVSLEPVILFSFLSLLNQLMYSVLYNLTNFSACYQCLISVN  
FLSYDLCLMKSIPLGYSPGTSVDVALSTGERAGGHFAALPIDLIQAFIYLI IAGAME  
AFVSISETMVQTLFSSGYGVTGGVGTVAKSASQAMLSTVGLDDKTQSMIQSIKQKMSK  
DRGKIEAKLPNTPKQPDKKEDSKGSSDKTTSRDKPTLQSDQKQNFDETIRSDPSAKA  
KNKEENGEE"  
/product="type IV secretion  
system protein"  
/besthit="qcoverage 100 , hcoverage 100 , similarity 100  
 , identity 100 , evalue 0.0 , alnlength 981 , Bacteria ,  
Proteobacteria , WP\_174516844.1 MULTISPECIES: type IV

```

gene      secretion system protein [unclassified Wolbachia]"
          complement(10856..13243)
          /locus_tag="wEsol_00494"
CDS       complement(10856..13243)
          /locus_tag="wEsol_00494"
          /codon_start=1
          /transl_table=11
          /pfam="TrbL Pfam-B_6060"
          /fullproduct="qcoverage 100 , hcoverage 100 , similarity
100 , identity 100 , evaluate 0.0 , alnlength 795 ,
Bacteria , Proteobacteria , WP_174516845.1 MULTISPECIES:
type IV secretion system protein [unclassified
Wolbachia]"
          /translation="MLKFLLIIPFFFLSGCGEHHCIKPENLSGLREKLDIVSTEQKWV
DSGVNISDRIRVTEIDIVPSKVNFCPKQYADFAIGPGRNDVALPFALKKGDTISFSVI
GSKVCKDKESETKIRYLKIDEKCSEQETEHFAHVLNQEKQGGKDGICPNKYIIGDAQ
WLSGREYWFSKLDQDERKKEIENIINSIKQGENIDCSKLSSESSASKIDTHILNSLCRR
ICKFSSGRGEDCVYIEYNNIEIELFNALNSSGESVVAEIIISNVLKKGQVKTDITFLK
VGMDNETLEHIPGGGLCTSCDHKMENDHQIPSLTFSLCSRNDKSCYNTNDKGGFNIRV
TKNHSLENSLYISVSDKFPEHKPGENQADISVDISKVHDMENLKGKLDKDTGTIYYGI
RDHGCDYKNEGQFSINLTTQEPPTKTFSAIYNFFDEKVKTAFFGSNYKDPNAIHSDTS
PVKSLYESFIKSSRTNTIRSTIISLLVLYIILYTLYYFFGLTHISIEFLIICVKIGI
IAQLLQDNSWDFFYNNAFSIFINTPKQLIEIANFRGTTSNVFEFLDLPLNRFLLSSHV
LLIVSLIFSGPLGIVSFCLVIWGLITVSLSIFNALFSFITSIAIVALLLSLAPIFIIC
LLFAYTRQMFQNWVKNLARFAIHPVLLIFISLISQVMDYIVYSVFDFEVCSTCILNI
NLKIFNPCIFYGYASKYTPNITAMMAFVILGHAMKALVEASSAISDSLFGAYVASEPG
RQYQQSLMGTVGLDERSVQRRERGDASQQSGTSRPQIPQGTQQRSTPQIPQGRQQ"
          /product="type IV secretion
system protein"
          /besthit="qcoverage 100 , hcoverage 100 , similarity 100
, identity 100 , evaluate 0.0 , alnlength 795 , Bacteria ,
Proteobacteria , WP_174516845.1 MULTISPECIES: type IV
secretion system protein [unclassified Wolbachia]"
gene      complement(13253..15817)
          /locus_tag="wEsol_00495"
CDS       complement(13253..15817)
          /locus_tag="wEsol_00495"
          /codon_start=1
          /transl_table=11
          /pfam="Pfam-B_18406 TrbL Pfam-B_18406 Pfam-B_18406"
          /fullproduct="qcoverage 100 , hcoverage 100 , similarity
100 , identity 99.9 , evaluate 0.0 , alnlength 854 ,
Bacteria , Proteobacteria , WP_015589248.1 MULTISPECIES:
type IV secretion system protein [unclassified
Wolbachia]"
          /translation="MFKTKLSLLLIAIFLLNIDFLLSYPVLADGVSGTDKTEFVSRFN
STGSFSRASNPDCGAFKTAALAGIAIAVGAIFTGIVLIVSSAGLFTALVIVGMIAAI
VGWVKAIGGLVVCESFVKHPVARDHDGKYKNFKLEDTGYSGCTNENYQTEEEYFSC
QNKAREDVNKKDYDGKRAEKEALNSNVQESTESYYWPKNGVQYSEYIEVCHRNPLTF
NLFNKVDFNSRGKPGYIDFDVREKDTGYVDGSWSSKVDGGLECRVLKAGQSEPIHGAT
FKAVRKTRGLCVELASVSMLGIEMTPWPQGVDMGCTELPPDPLAPMCEKSMIFKNKD
GTGEEKVTIGNDDYKTIIRSKEKGLNGQGGKIFVGYDNAGCFSSYVSEACYNQAGSK
SLAPIPVTSMIVQCIKESLDNLVAGKGAPNGESFISVAQKRLKNTVTAVLVLALILFS
IKAMSGGVQRPQEMYMLIIKFALVIYFTTGSTISHYYGELTRLSNGLSEIVLKASSES
KGICNYKAGTDYEYTRAGKRVSYSYLAPWDRDLDCRILFYLGAPLDGIGGKIGTGGVAT
LAVLLGAAPVLLVAGSVIGIIFAGGQILVALVCIFMAVLMVVILWLCYVFILSLVAL
SVIIISPLFIPMVLVQHTKGYFEGWVKELITYSLYPVILFAFLSFMFIACDKIYFKN
LNFELDESYKNEQPDKSYEKKQAEISYSKKKQWFKLKDGECDKNETTLACMMQNYFSK
KSSILGLFDFTYMEFGSSSIGELLKLCVLFLFYHFLNILPGMAAELAGNHRAALGSG
QTPGQMVGKALSAKAAAGGVAGVAGAAAKKLSGGDKSKSRGSGSSSSSESVNKSTE"

```

```

/product="type IV secretion
system protein"
/besthit="qcoverage 100 , hcoverage 100 , similarity 100
, identity 99.9 , evalue 0.0 , alnlength 854 , Bacteria ,
Proteobacteria , WP_015589248.1 MULTISPECIES: type IV
secretion system protein [unclassified Wolbachia]"
gene complement(15810..18215)
/locus_tag="wEsol_00496"
CDS complement(15810..18215)
/locus_tag="wEsol_00496"
/codon_start=1
/transl_table=11
/fullproduct="qcoverage 100 , hcoverage 100 , similarity
100 , identity 100 , evalue 0.0 , alnlength 801 ,
Bacteria , Proteobacteria , WP_010962886.1 MULTISPECIES:
VirB4 family type IV secretion/conjugal transfer ATPase
[Wolbachia]"
/cog="VirB4 COG3451 796 Type IV secretory pathway, VirB4
components"
/pfam="CagE_TrbE_VirB AAA_23 TrwB_AAD_bind AAA_10 AAA_22"
/tigr="TIGR00929 VirB4_CagE 792 type IV
secretion/conjugal transfer ATPase, VirB4 family"
/product="VirB4 family type
IV secretion/conjugal transfer ATPase"
/translation="MLRFRAIQSKNKSTLNREHVHAAEFIPYSCYWNSTTLMTKENWL
V
KVIKLSGFAFETADDEDLVIQNNIRNQMLRSISSPAFSLYFHTIRRKKNIFSDEFASQ
GLPNFFANHVNLKWREKHATRQSFINDLYITIIRRADTKGVEFLSHLLKKFGHVTSKH
AWESDIRATYEDLEETTNRVVTSLRNYSPKILGVKETPDGLFCEIMEFLSRIVNCGFV
TNTLFLPLRTEISRYLPVHRLFFGRKMIQVVTHNESKYAGIISIKEYGNHTSAGMLDSF
LQLPYEFIITQSFQFINRQMAIGKMQIQQNRMIQSADKAISQIAEISQALDDAMSGKI
AFGQHHLTILCIEKSPKSLDNALSLVESELSNCGVYPIRERVNLEPAFWAQIPGNFDY
IVRKATISSLNLGAFASQHNYPTGNKFNNHWGDAVTVFDTTSGTPFFFFNFHIRDVGHT
MIIGPTGAGKTVLMNFLCAQAMKFSPIRFFFDKDRGAEIFLRALSGIYTVIEPRTKT
N
FNPLQLDDTSDNRTFLMEWIKSLISVYNDKFTSEDIARINDAIEGNFKLRKEDRFLRN
LVPFLGLAGPDTLAGAISMWHDNGSHAAIFDNKEDLLDFSRARVFGFEMASLLKDPVA
LGPVLIYLFHRISISLDGTPSIIIVLDEAWALIDNPVFAPKIKDWLKVLRKLNAFVIFA
TQSVEDASKSTISDTLVQQTATQIFLPNLKATSVYRDVFMILTEREYILIKHTDPSTRF
FLVKQGVNAVVARIDLKGLDDIINVLSGRAESVLLLHDILNEVGDNPKVWLPIFYQKV
KNV"
/besthit="qcoverage 100 , hcoverage 100 , similarity 100
, identity 100 , evalue 0.0 , alnlength 801 , Bacteria ,
Proteobacteria , WP_010962886.1 MULTISPECIES: VirB4
family type IV secretion/conjugal transfer ATPase
[Wolbachia]"
gene complement(18225..18521)
/locus_tag="wEsol_00497"
CDS complement(18225..18521)
/locus_tag="wEsol_00497"
/codon_start=1
/transl_table=11
/fullproduct="qcoverage 100 , hcoverage 100 , similarity
100 , identity 100 , evalue 1.26e-62 , alnlength 98 ,
Bacteria , Proteobacteria , WP_007548615.1 MULTISPECIES:
type IV secretion system protein VirB3 [Wolbachia]"
/cog="VirB3 COG3702 105 Type IV secretory pathway, VirB3
components"
/pfam="VirB3"
/product="type IV secretion
system protein VirB3"
/translation="MSTGSIQTDQLFKGLTRPAMLFVSYMFALINVLICMLIFINSN

```

```

DLRVILLMLPGIHGLGYIASAKEPLFIELFMVKLGKCSKCLNRFYHGANSYDIA"
/besthit="qcoverage 100 , hcoverage 100 , similarity 100
, identity 100 , evaluate 1.26e-62 , alnlength 98 ,
Bacteria , Proteobacteria , WP_007548615.1 MULTISPECIES:
type IV secretion system protein VirB3 [Wolbachia]"
gene 18630..20165
/locus_tag="wEsol_00498"
CDS 18630..20165
/locus_tag="wEsol_00498"
/codon_start=1
/transl_table=11
/fullproduct="qcoverage 100 , hcoverage 100 , similarity
99.8 , identity 99.8 , evaluate 0.0 , alnlength 511 ,
Bacteria , Proteobacteria , WP_015589250.1 MULTISPECIES:
lysine--tRNA ligase [unclassified Wolbachia]"
/cog="LysS COG1384 521 Lysyl-tRNA synthetase (class I)"
/pfam="tRNA-synt_1f Pfam-B_854"
/tigr="TIGR00467 lysS_arch 515 lysine--tRNA ligase"
/product="lysine--tRNA
ligase"
/translation="MTSWPFQEA EKILQEFPNKKEIIFETGYGPSGLPHIGTFGEVFR
TTVIVNALKKIIAPGIKTKIIAVSDDMDGLRKIPDNVPNQEMLREHLNKPLTMIPDPFG
THQSYGHHMNSLLCKFLDMFEFEYEFRSATECYKSGVYDEKLLLLLKNYDKVMDVMLP
SFREERQQTYSPFLPICPKTSQVLQVPVIETNTEKGTITYEDPNGEKIEVPVTKGKCK
LQWKPDWGMRWAAFGVNYEAHGKDLTPSAVLSSQICEILGEKPLLFCYELFLDKERK
KISKSKNGGISIEEWLTYAPTESLALYIFQSPKKAKRLYFDVIPKSTDEYLEFVKRYH
ENKEKDINNPAWHIHQGNVPSIETSGINFSLLLNLAAACNAENKEILWGFISSYAPNV
TPENNKMLDRLSDFAVKYYHDFIKPTKSYKTPNEKEKAALLDLKDTLHSLSTTATAEE
IQSQVFSIGKKYDYTNLRDWFQLLYETLLGQKTGPRMGFSIKLYGIGNTISLIESATK
CIL"
/besthit="qcoverage 100 , hcoverage 100 , similarity 99.8
, identity 99.8 , evaluate 0.0 , alnlength 511 , Bacteria ,
Proteobacteria , WP_015589250.1 MULTISPECIES:
lysine--tRNA ligase [unclassified Wolbachia]"
gene complement(21099..23732)
/locus_tag="wEsol_00499"
CDS complement(21099..23732)
/locus_tag="wEsol_00499"
/codon_start=1
/transl_table=11
/fullproduct="qcoverage 100 , hcoverage 100 , similarity
99.9 , identity 99.9 , evaluate 0.0 , alnlength 877 ,
Bacteria , Proteobacteria , WP_141457239.1 MULTISPECIES:
alanine--tRNA ligase [unclassified Wolbachia]"
/cog="AlaS COG0013 879 Alanyl-tRNA synthetase"
/pfam="tRNA-synt_2c tRNA_SAD"
/tigr="TIGR00344 alaS 847 alanine--tRNA ligase"
/product="alanine--tRNA
ligase"
/translation="MKLNEIRERFIKFFVNNDHEQVSSSPLIPEHDS TLMFTNAGMVQ
FKNIFTGAQKTEMKRAVSSQKCLRAGGKHNDLENVGYTTRHHTFFEMLGNFSFGDYFK
ETAIEFAWEFITKELSLDKNRLSITVYHTDDEAYEIWRKISGFSSDKIIRITDDNFW
SMGSTGPCGPCSEIFYDHGSPNLQEGDRIVEIWNLVFMEFNKDEEGNLHKLPPKKCIDT
GMGLERIAAVMQNVHDNYDIDLFSALINKSQEYCGRTENKIAHKIVADHLRAAFLIA
EGVLPGNEGRNYVLRRLIRRATRYIHLLGYNDSLLHRIFPVLIDSTSSAYMGAELVRA
KSLIETTLKSEENFKDTLMKGISLLEKFTADLKP GDTLP GELAFKLYD TYGFPLDIT
LDILKEKKINF DQKGFD DAMGEQKERARAKWAGSGEKSVEQVWFDLIDKFGKTKFVG Y
EFNEVND AKILAIVSSKNEVIDSAKEGEKITIILDKTPFYGESGGQV GDTGSLIKSDR
SIIIVENTNKVNDLYLHRCIVKFGSICKGNTVAASIDKERRQTLRRNHSATHLLHFVL
RKILGDHVTQKGS LVAPDKLRFD FSHNTQVTQDQLFLVEDMVNSLIRENLSTSTKIQS

```

```

MNQAIDEGAMALFGEKYGNQVRVVKIGDSRELCCGTHVEHTGEIGLFKIVTESSVAFG
VRRIEALTGQEAINYVRDNEINLKKVAEFVKAPASEIINRLNILNQERKESEAKIKNL
YKKLISAESIKSTEINGINFVSHAFTNIPANIIREFVLQQQPKPTIIAFTATEKDKTV
LIIKVSVDLANKISAKELVSI AVEKNCGGNAELAQTGCDSNKIDDAITAICSKIAASK
HSTSYHHEPSYRRGANKQRDT"
/besthit="qcoverage 100 , hcoverage 100 , similarity 99.9
, identity 99.9 , evalue 0.0 , alnlength 877 , Bacteria ,
Proteobacteria , WP_141457239.1 MULTISPECIES:
alanine--tRNA ligase [unclassified Wolbachia]"
gene 23898..24341
/locus_tag="wEsol_00500"
CDS 23898..24341
/locus_tag="wEsol_00500"
/codon_start=1
/transl_table=11
/fullproduct="qcoverage 100 , hcoverage 100 , similarity
100 , identity 100 , evalue 5.38e-103 , alnlength 147 ,
Bacteria , Proteobacteria , WP_015589252.1 MULTISPECIES:
PAS domain-containing protein [unclassified Wolbachia]"
/cog="COG5388 COG5388 209 Uncharacterized protein
conserved in bacteria"
/pfam="Pfam-B_17152 PAS_5"
/product="PAS
domain-containing protein"
/translation="MEIYVGKEKRIANVVTQHWNDIKGSDRDWPERHEIDTAEIMESW
QHCFIIEVKDQGYICENAGEKAVEFYGFENKTRIDNKY AIDAPFLRLYKIDAVIDKLD
TVIESKCPINEEEEESESVKMRQVLLPLGNKEGITHILGVITFKLL"
/besthit="qcoverage 100 , hcoverage 100 , similarity 100
, identity 100 , evalue 5.38e-103 , alnlength 147 ,
Bacteria , Proteobacteria , WP_015589252.1 MULTISPECIES:
PAS domain-containing protein [unclassified Wolbachia]"
gene 24440..24646
/locus_tag="wEsol_00501"
CDS 24440..24646
/locus_tag="wEsol_00501"
/codon_start=1
/transl_table=11
/fullproduct="qcoverage 100 , hcoverage 100 , similarity
100 , identity 100 , evalue 2.16e-36 , alnlength 68 ,
Bacteria , Proteobacteria , WP_015589253.1 MULTISPECIES:
50S ribosomal protein L35 [unclassified Wolbachia]"
/cog="RpmI COG0291 65 Ribosomal protein L35"
/pfam="Ribosomal_L35p"
/tigr="TIGR00001 rpmI_bact 63 ribosomal protein L35"
/product="50S ribosomal
protein L35"
/translation="MKKIKLTKSSVKKRFHLTAKGKVISTQSGKRHGMVKRSKSNIR
NQRGTTILGKSDSRIVKLYMPYGI"
/besthit="qcoverage 100 , hcoverage 100 , similarity 100
, identity 100 , evalue 2.16e-36 , alnlength 68 ,
Bacteria , Proteobacteria , WP_015589253.1 MULTISPECIES:
50S ribosomal protein L35 [unclassified Wolbachia]"
gene 24667..25032
/locus_tag="wEsol_00502"
CDS 24667..25032
/locus_tag="wEsol_00502"
/codon_start=1
/transl_table=11
/fullproduct="qcoverage 100 , hcoverage 100 , similarity
100 , identity 100 , evalue 6.56e-78 , alnlength 121 ,

```

Bacteria , Proteobacteria , WP\_015589254.1 MULTISPECIES:  
 50S ribosomal protein L20 [unclassified Wolbachia]"  
 /cog="RplT COG0292 118 Ribosomal protein L20"  
 /pfam="Ribosomal\_L20"  
 /tigr="TIGR01032 rplT\_bact 114 ribosomal protein L20"  
 /product="50S ribosomal  
 protein L20"  
 /translation="MARVKRGVTTHARHKKILKLAKGYRGRAKSCYRIALQRVEKALQ  
 YAYRDRNRKRDFRGLWIIIRINAAVREHGLTYGRFMHGLTLAGIDLNRKILAEMAVNY  
 KDDFAKLVEAVSGKLAENS"  
 /besthit="qcoverage 100 , hcoverage 100 , similarity 100  
 , identity 100 , evalule 6.56e-78 , alnlength 121 ,  
 Bacteria , Proteobacteria , WP\_015589254.1 MULTISPECIES:  
 50S ribosomal protein L20 [unclassified Wolbachia]"  
 25060..25944  
 /locus\_tag="wEsol\_00503"  
 CDS 25060..25944  
 /locus\_tag="wEsol\_00503"  
 /codon\_start=1  
 /transl\_table=11  
 /fullproduct="qcoverage 100 , hcoverage 98.3277591973244  
 , similarity 100 , identity 100 , evalule 4.19e-208 ,  
 alnlength 294 , Bacteria , Proteobacteria ,  
 WP\_015589255.1 MULTISPECIES: methionyl-tRNA  
 formyltransferase [unclassified Wolbachia]"  
 /cog="Fmt COG0223 307 Methionyl-tRNA formyltransferase"  
 /pfam="Formyl\_trans\_N Formyl\_trans\_C"  
 /tigr="TIGR00460 fmt 315 methionyl-tRNA  
 formyltransferase"  
 /product="methionyl-tRNA  
 formyltransferase"  
 /translation="MGSPEFAVSTLNLLLKSQNKIVAVYTKAPKPSGRGQKPTKSPVH  
 VIAEESNIEVCTPISLKFSAEQEKFRNFKPDVAVVAAYGLILPREILNIPKYGCINI  
 HPSLLPRWRGAAPIQHTILAGDQETGVSIMQLDEGLDSGPILKQEKFLIEKNDNYKTLH  
 DKLSELGSDLLLEVLNEIEKQLLLKQNDNDACYANKVEDYKIYASDACEVAYRKVKAF  
 YPKAFIKIENKRIRILDADFEALASEQGKIVNDNMHISLKGGLTIPKVVQMEGRNPCS  
 IEDFIRGLKSSMVKKFIE"  
 /besthit="qcoverage 100 , hcoverage 98.3277591973244 ,  
 similarity 100 , identity 100 , evalule 4.19e-208 ,  
 alnlength 294 , Bacteria , Proteobacteria ,  
 WP\_015589255.1 MULTISPECIES: methionyl-tRNA  
 formyltransferase [unclassified Wolbachia]"  
 26025..27536  
 /locus\_tag="wEsol\_00504"  
 CDS 26025..27536  
 /locus\_tag="wEsol\_00504"  
 /codon\_start=1  
 /transl\_table=11  
 /fullproduct="qcoverage 100 , hcoverage 100 , similarity  
 99.8 , identity 99.8 , evalule 0.0 , alnlength 503 ,  
 Bacteria , Proteobacteria , WP\_015589256.1 MULTISPECIES:  
 bifunctional phosphoribosylaminoimidazolecarboxamide  
 formyltransferase/IMP cyclohydrolase [unclassified  
 Wolbachia]"  
 /cog="PurH COG0138 515 AICAR transformylase/IMP  
 cyclohydrolase PurH (only IMP cyclohydrolase domain in  
 Aful)"  
 /pfam="MGS AICARFT\_IMPCHas"  
 /tigr="TIGR00355 purH 511  
 phosphoribosylaminoimidazolecarboxamide

```

formyltransferase/IMP cyclohydrolase"
/product="bifunctional
phosphoribosylaminoimidazolecarboxamide
formyltransferase/IMP cyclohydrolase"
/translation="MKIKRALISVYDKTNIIDLASFLMQQQIEILSTGNTYKALSDAG
IKTQEVSDYTQFPEILGGRVKTLPKIHGGILYDREKHKKEVQDLEIEPIDLLITNLY
PFWETVSSSSNEEQIIEQIDIGGVALIRAAAKNFRFTSVISRIQDYEALKAEMIENNN
KTTLEYRKHLATKAFALTAHYDSNIHSWFLSQSKNNELPEFFALYGHKVQELRYGENP
HQKAAFYSNQFTEYPLEKLHGKELSYNNIVDIESALNITSEFEPPAAVVIKHNNPCGA
AIGNNALEAYEKALSCDEVSSFSGGIVALNREIDLKLAEKLNEIFLEVVIAPSVNNEAL
KILQRKKNLRVIIHKSFQQNVKYQTKNVVGGLVQENNDHTIKAEQVTECTATDKEKK
DLIFAWKICKHVKSNAIVIAKDGCAIGIGAGQTSRIDSVNIAVKKAGEKCKGAVLASD
AFFPPFDSIVESTKHGITAI IQPGGSLKDQDVIKAANENKIAMFFTGVRSFFH"
/besthit="qcoverage 100 , hcoverage 100 , similarity 99.8
, identity 99.8 , evalue 0.0 , alnlength 503 , Bacteria ,
Proteobacteria , WP_015589256.1 MULTISPECIES:
bifunctional phosphoribosylaminoimidazolecarboxamide
formyltransferase/IMP cyclohydrolase [unclassified
Wolbachia]"
gene 28377..29897
/locus_tag="wEsol_00505"
CDS 28377..29897
/locus_tag="wEsol_00505"
/codon_start=1
/transl_table=11
/fullproduct="qcoverage 100 , hcoverage 100 , similarity
100 , identity 100 , evalue 0.0 , alnlength 506 ,
Bacteria , Proteobacteria , WP_015589257.1 MULTISPECIES:
2,3-bisphosphoglycerate-independent phosphoglycerate
mutase [unclassified Wolbachia]"
/cog="GpmI COG0696 509 Phosphoglyceromutase"
/pfam="Metalloenzyme iPGM_N Phosphodiester Alk_phosphatase
Sulfatase"
/tigr="TIGR01307 pgm_bpd_ind 504
2,3-bisphosphoglycerate-independent phosphoglycerate
mutase"
/product="
2,3-bisphosphoglycerate-independent phosphoglycerate
mutase"
/translation="MNIKSVVLCILDGWNGIENNKYNAISNANPPCWQYISSNYPKC
SLSACGTDVGLPGGQIGNSEVGHMNI GSGRVVMQSLQRINQEIGTIENNVNLQSFIND
LKSKNGICHLVGLVSDGGVHSHQKHISTLANKISQHGKIVVIHAFDGRDTLPNSGKK
CIQEFIKSIKGNDIRIATVSGRYYAMDRDNRWERTIEAYEAI AFAKAPRHDAVSLID
ENYQNNITDEFVRPAVIGDYQGIKPEDGVLLANFRADRM IQLASILLGKTDYIEVAKL
SSILSMMKYKEDLKIPHIFPPTS FADTLGQTIADNKLQQLRIAETEKYAHVTFFFNCG
KEEPPFSGEERILIPSPKVQTYDLQPEMSAFELTEKLVEKIHSQEFALIVVNYANPDMV
GHTGNIAAAEKAVLAVDDCLAKVLSAVKKSSNTALIVTADHGNVECMFDEENNTPHTA
HTLNKVPFIVSCDNLKLRDGR LSDIAPTILQLLG IKKPNEMTGSSSLISCITLCHSS"
/besthit="qcoverage 100 , hcoverage 100 , similarity 100
, identity 100 , evalue 0.0 , alnlength 506 , Bacteria ,
Proteobacteria , WP_015589257.1 MULTISPECIES:
2,3-bisphosphoglycerate-independent phosphoglycerate
mutase [unclassified Wolbachia]"
gene complement(29937..30917)
/locus_tag="wEsol_00506"
CDS complement(29937..30917)
/locus_tag="wEsol_00506"
/codon_start=1
/transl_table=11
/fullproduct="qcoverage 100 , hcoverage 100 , similarity

```

100 , identity 100 , evalue 2.13e-225 , alnlength 326 ,  
Bacteria , Proteobacteria , WP\_015589258.1 MULTISPECIES:  
ACP S-malonyltransferase [unclassified Wolbachia]"  
/cog="FabD COG0331 310 (acyl-carrier-protein)  
S-malonyltransferase"  
/pfam="Acyl\_transf\_1 Pfam-B\_728"  
/tigr="TIGR00128 fabD 290 malonyl CoA-acyl carrier  
protein transacylase"  
/product="ACP  
S-malonyltransferase"  
/translation="MIFAFPGQGSQFVGMGRSLYSEFSVARQVFNEVDSILDGKLSHL  
IFNGPIEELTITENAQPAIMAVSIAMLRVMEHVFGKSLFTDHNVKYVCGHSVGEYAL  
CAAGALTLESIAIKLLKVRSEAMHEASLKCKGGMVALLGAEINEVEDILKSVQIDGICE  
IANDNGGGQVVISGTREALEMLPDLFKNSSVRKLIKQVSGPFHSSLMKPADEKVLEF  
LKGIKITRPIVPLISNVTAKEESDPKVIKTLLAKQVVS RVKWREMLVLYMSSRGINKFV  
EIGPNKVLSNLVKRIDQSISTKNIDSIGDIDSFFNESLVLTAKNLKVGLS"  
/besthit="qcoverage 100 , hcoverage 100 , similarity 100  
, identity 100 , evalue 2.13e-225 , alnlength 326 ,  
Bacteria , Proteobacteria , WP\_015589258.1 MULTISPECIES:  
ACP S-malonyltransferase [unclassified Wolbachia]"

gene 31046..31249  
/locus\_tag="wEsol\_00507"

CDS 31046..31249  
/locus\_tag="wEsol\_00507"  
/codon\_start=1  
/transl\_table=11  
/fullproduct="qcoverage 100 , hcoverage 100 , similarity  
100 , identity 100 , evalue 3.19e-42 , alnlength 67 ,  
Bacteria , Proteobacteria , WP\_007548602.1 MULTISPECIES:  
50S ribosomal protein L31 [Wolbachia]"  
/cog="RpmE COG0254 75 Ribosomal protein L31"  
/pfam="Ribosomal\_L31 Pfam-B\_2961"  
/tigr="TIGR00105 L31 68 ribosomal protein L31"  
/product="50S ribosomal  
protein L31"  
/translation="MNYHKIIIVMTDGQEFETRSTYKKEGDRVKLDRDPLTHPAWTGS  
LTSGLASKTSKLAKFNDDKYGSIF"  
/besthit="qcoverage 100 , hcoverage 100 , similarity 100  
, identity 100 , evalue 3.19e-42 , alnlength 67 ,  
Bacteria , Proteobacteria , WP\_007548602.1 MULTISPECIES:  
50S ribosomal protein L31 [Wolbachia]"

gene 31288..32082  
/locus\_tag="wEsol\_00508"

CDS 31288..32082  
/locus\_tag="wEsol\_00508"  
/codon\_start=1  
/transl\_table=11  
/fullproduct="qcoverage 100 , hcoverage 100 , similarity  
100 , identity 100 , evalue 4.52e-189 , alnlength 264 ,  
Bacteria , Proteobacteria , WP\_141457245.1 MULTISPECIES:  
NAD kinase [unclassified Wolbachia]"  
/cog="nadF COG0061 281 NAD kinase"  
/pfam="NAD\_kinase Pfam-B\_15665"  
/product="NAD kinase"  
/translation="MHKYKNIGYVASPSPKSQEVSKLLKKLNFINITEENKSEIDLLI  
VVGGDGFMLRTLHNYVIENKNMHVYGVNTGNVGFMLNKCFSRSEDLDHIEHATSTQL  
TLLKMEATDTSKRYHYIAVNEVYVFRKANQIVEMNITINDKLKVEKFRGDGVILSTP  
TGSTAYNFSAGGPILPLNSNLLALTSINSYYPRHWNGALISNDTIVQIDINDTKNRPA  
LVVSDYKEFHDISQIKIQKDHEINTITLLFDKDYPLNERIFDRQFLY"  
/besthit="qcoverage 100 , hcoverage 100 , similarity 100

```

, identity 100 , evaluate 4.52e-189 , alnlength 264 ,
Bacteria , Proteobacteria , WP_141457245.1 MULTISPECIES:
NAD kinase [unclassified Wolbachia]"
gene 32398..33861
      /locus_tag="wEsol_00509"
CDS   32398..33861
      /locus_tag="wEsol_00509"
      /codon_start=1
      /transl_table=11
      /fullproduct="qcoverage 100 , hcoverage 100 , similarity
100 , identity 100 , evaluate 0.0 , alnlength 487 ,
Bacteria , Proteobacteria , WP_174516898.1 hypothetical
protein [Wolbachia endosymbiont of Cardiocondyla
obscurior]"
      /translation="MHGSVEKSTVKLTSYEQTGDNSKITLKDPPSPREEAGNAISSVLN
VVPRVQGMSHEESDDEEVDPTYASVNRQKDG DGAPPILPKAPGLQDKEDKNLFG LSTE
VLPPSLEETKGETHDWVSQTASLGLGGLSGNGSEEHYAAIDPNAKSSKKS LDSGIGG
QNSKDDL GASSNTLPSYKSKDDSEESLSLNSDIGSTTNKKTNRFLPRAKYAMQQKGF I
IFGASAIILSISAALLYLQDKAKFIAFFTNSPKYITVPVIALAALLAIGPIFFATRQF
IDTEEHSIQKKDADKILAEVLEHQPKDKAIKSVRLEYSNGTHSNFVLNAWEAKQGFTN
IDKVITRTNKIKSVINDRPIFTALFTGVVAANIAFPLGLLATHGVNGVQKFYQNPLT
NNIGLSLLIGSGILALLIVGFGIHYYRKTNCTNLIYSQEKIDPESVNKKFIEEIKHER
TNVLGENH GKDAKRSSLTLEQVVVQSHNCKDVVYSVG"
      /product="hypothetical protein"
      /besthit="qcoverage 100 , hcoverage 100 , similarity 100
, identity 100 , evaluate 0.0 , alnlength 487 , Bacteria ,
Proteobacteria , WP_174516898.1 hypothetical protein
[Wolbachia endosymbiont of Cardiocondyla obscurior]"
gene 28272..28343
      /locus_tag="wEsol_tRNA-06"
tRNA 28272..28343
      /locus_tag="wEsol_tRNA-06"
      /gene="tRNA-Asn"
      /intronpos="0..0"
      /program="tRNAscan-SE"
      /cove_score="77.3"
      /evidence=predicted
      /type="Asn"
      /anticodon=GTT
      /product="tRNA-Asn (GTT) "

```

#### ORIGIN

```

1 ttaagaaatt taccaaatga aaaaaaaggc aaaagaaacc ccgtggtggt tggctattta
61 ccatgtacta aaatatcggc atttttttta ttctaaaacg cttgattaag agcgatttag
121 ctgcttttaa cttgcaacta acctacaccg caagtgttta agaaatttac caagcaggaa
181 aaaaggcaaa gaaaccctag ggtagctagt attcaaatc tcccttgtca atttgacgtt
241 ttttgctgtc ttaaacgctt tgtaagcgcg tttcggtcta tataggtaaa aaccagaga
301 tttttaaaga catgcatgac acgtagtgcg aaaaattaaa catgagacgc caaataccct
361 aagttttttg tcattaacct gcacagattg cgaagataaa taaatagctt cagtttcatg
421 ataagggggc tggcggagtt tgtcaaggaa gttttttggt tctattgaat gacagttgta
481 acctacgaaa gaagtctgtt gtaatttgta cgatatcttt ataaaatggt tcgcataagt
541 tatctagcag tgcaactaaa caaatacaaa aatcaaaaacg tcgcggtttt tgggtcttgg
601 aaaactgggt tatccgccat taacgctcta acaaagagtg gtgcaagaat atatgcatgg
661 gatgatcatg aagagcaaat agcaaataca aaaatgatgt ataaaaaatg taattttatt
721 catcccaagg aatacaattg gcatgagatc agtgcattgg ttttaagccc tggagtgcc
781 acagagccac attggatagt aaaacttgca aggagatttg attgcaaaaat aaaatcagac
841 attgagctat ttcttgaagc taaaactacg aaccagaagg taataggcgt cacaggaaca
901 aatggtaaat caaccactac atcactaata gggcacatat taaaatctgc agggaaaaaa
961 gtagctattg gtggaaattht aggcgttcct gttttggatc tagaaagaga tgcagaaatt
1021 tatgtaatcg aactctcctc ttttcaattg gagttgatga atgaaattaa cgtggacatt
1081 tcagcactgc tcaatattac accagatcac atagataggc atggaagtat ggagaactac

```

|      |             |             |             |             |             |             |
|------|-------------|-------------|-------------|-------------|-------------|-------------|
| 1141 | atagcaacta  | aattaaaact  | gataaacggt  | agtgagggtg  | ccgtaatagg  | atgtgacaat  |
| 1201 | gagattactg  | ctgatataatt | caacaaattc  | actggagaca  | aaattccaat  | ctcagtaaca  |
| 1261 | tattccccga  | tgtcattcca  | gcgcgtgacg  | ctggaatcca  | gaaaagaaaa  | accattgccca |
| 1321 | actactcaga  | tgacagaggg  | tggtgcaaga  | gatctaatat  | cattggcagg  | taacaatttg  |
| 1381 | cttgattata  | gtgaacagat  | tactggtata  | gatcgaaatt  | atctggatcc  | cagtgtcagc  |
| 1441 | tacttggatg  | acaaaagggg  | cactgggatac | cagaagatct  | cgttaaaact  | agagaatcat  |
| 1501 | agcttatcag  | taagcgacgt  | gaaaataaac  | ctaatatcca  | acgcagaaaa  | catagcagcc  |
| 1561 | acatatgccg  | tatgtaaggt  | acttggagta  | gatagcaaca  | ctattatcaa  | tggaatcaag  |
| 1621 | tcctttttcag | gactgaggca  | taggaatgaa  | ctgcttggca  | aaataagaaa  | tgtgtttttc  |
| 1681 | gtgaacgata  | gcaaagcaac  | taatgcaaaa  | tcgagcgaaa  | aggcgatctt  | atcttatgaa  |
| 1741 | aacataaatt  | ggatcgctgg  | tggaagaagc  | aaaaaagggtg | gaatagaatc  | attaagcaag  |
| 1801 | catttttaca  | gggttagaaa  | agcttttctt  | attggagaat  | caaccgaagc  | ttttgcaaat  |
| 1861 | gttatggaga  | ataaagtaga  | ttatgtttaa  | tgttgcaatc  | tagaagatgc  | attcagattg  |
| 1921 | gcttttgaag  | aggccttaaa  | tagcgcagaa  | gaagtaacaa  | tattactttc  | tccgcgctgt  |
| 1981 | gcttcttttg  | atcaatggaa  | aaatttcgag  | gaacgtggtg  | aagcattttg  | tagaatgttt  |
| 2041 | gaaaatctca  | ggtacaatca  | cacatgctgt  | ttagtatgat  | gttgcggtga  | acaaaagtta  |
| 2101 | ataatagata  | agctaattag  | ggttattcca  | tttgaaggga  | taagcgatga  | aaccctatta  |
| 2161 | aaggtgtgca  | ctgaccttaa  | tctagctaatt | agcttttgca  | aatcttcagaa | tggaatatat  |
| 2221 | agcgcttttg  | agcacatagc  | agaggactta  | aatagctcaa  | tggaagctga  | attaagaaat  |
| 2281 | tctaatttag  | aagatatgaa  | agtgcgagag  | cgagtaaagt  | tagctattca  | aatacacctt  |
| 2341 | tcaaactatg  | ctaagctacc  | gaattataga  | gaacttttaa  | aaaatgtttt  | atcattctcc  |
| 2401 | gtatcaccaa  | aaaatacata  | tttttctagt  | aaacttttat  | acagaactat  | tagtgcgatt  |
| 2461 | tggtatggca  | ttcatgacca  | atcaacagat  | tttaactact  | atacaaaaag  | agcaatatta  |
| 2521 | gctggagtgt  | acttaagtac  | gatacttttt  | tttatcaatg  | attattcaga  | agattttgtg  |
| 2581 | gatactttat  | cgtttcttga  | taaccgtatc  | aacaatgtca  | tgacatttca  | aaaattcaaa  |
| 2641 | actcgcttaa  | aaggaatcat  | aggaaatttc  | ttataagcta  | ttgattgttg  | gtagaaaagt  |
| 2701 | acttgagcac  | gatcctgaaa  | aggtttgtga  | aaataaaaaat | attcatgctg  | atcataaaga  |
| 2761 | acatttagtt  | tatcgtaggg  | ataataatgg  | tacaacaaaa  | tacaccagtt  | acgaagaaaa  |
| 2821 | agaaaataaa  | tttattgaag  | aagcacatga  | atattttaata | gactctgaat  | ttaataaaaa  |
| 2881 | ttttgatcta  | gggcagtaca  | gaataagtaa  | tttctccgga  | aacttgacga  | aaatagaact  |
| 2941 | ggaactcatc  | aatgaaaagt  | atatgcaagt  | tcaagttaat  | agagaaagaa  | aaattattct  |
| 3001 | cgctataaccg | taggtgctgt  | ccaagattat  | actgaagttt  | ttattgcact  | caaaatcttc  |
| 3061 | gtttttccta  | atctctagaa  | ttatcaatgc  | atcatcactt  | aaccagcctg  | agtgagctag  |
| 3121 | tccattcaac  | gttgattcaa  | ctagattgct  | attgtaagggt | gggtctataa  | aaactatgtc  |
| 3181 | acatttttgaa | ataggtttgtg | gtaagcagtt  | agcactgcag  | caaatttagcg | taacattgtc  |
| 3241 | cgtaattcca  | aaatcttctg  | ctgttttttt  | aggcaattgc  | aaattgtaat  | aatctgaatc  |
| 3301 | taccataaat  | gcatgttttag | cgccgcgaga  | aagcgcttca  | aatgaaaaag  | aaccactacc  |
| 3361 | acagaataaa  | tcaagtacat  | tcaagttata  | aataggtttt  | cttgaggaaa  | gcatattaaa  |
| 3421 | tattgcttct  | cggacaatac  | tcatagttgg  | ccgtgcagct  | aaatgcttac  | ctgtagttat  |
| 3481 | ttttcttccg  | cgataatttg  | ctgcaatgat  | gcgtagcata  | ttaaataagc  | tccaaaataa  |
| 3541 | ttaattattt  | atactatatg  | attaatgtca  | atatggcttt  | agcagtttaa  | tagagagaag  |
| 3601 | ctatcgattc  | gcttgtaaga  | aaaacacaaa  | cacaagactc  | atcagttatc  | tttttctgat  |
| 3661 | ttgcctgctg  | cattaattgc  | ttgaccaatc  | tcatcttgta  | aatcatcatg  | atcatttttt  |
| 3721 | tcatcatgat  | ttagcccttc  | aattctgctt  | tctaactcta  | acttaattat  | agtattgatt  |
| 3781 | ttatctatat  | tatcaagaaa  | gcctctacat  | tcttcttcac  | tatactcttc  | accagatgct  |
| 3841 | tttttttcaa  | taaatagggt  | tttaaattcct | gctagatcag  | aattctgata  | ggtagttagt  |
| 3901 | acaacatttc  | tctctatgaa  | gctaagatct  | gacagcagta  | agctaacctc  | taacagatct  |
| 3961 | tcacttttca  | cgctttttaag | gtcttcaaga  | cttttcaaaa  | tactaaacac  | cttaatcctt  |
| 4021 | tcttgtacaa  | tctctttgtc  | ttccttatca  | aattcagaca  | ataaactatg  | attatctaca  |
| 4081 | aattttctcac | tcaaagcttt  | attcaattta  | gcaaaattga  | catccttgct  | aagtgatgtg  |
| 4141 | ttatcccgcga | acaagtctac  | ccttgcccta  | cgcgcattha  | aaatgtcgct  | gtagtcattt  |
| 4201 | aactttatgt  | tgccatcttt  | gtcttgctgc  | aattttataat | aatcaaggcc  | tttgaaattt  |
| 4261 | ttattagtct  | tcatcttcaa  | tcctcttctc  | atctcctttt  | gcatctgggt  | tcctcattgg  |
| 4321 | ttccggtaat  | ttcctttttac | tgtcttctcg  | atctcctttt  | tcctctcttt  | cagcacgttt  |
| 4381 | ttctacagct  | tctggagtgt  | tcatttcaaa  | aagtgggtgag | aggttataaa  | ctttatcttg  |
| 4441 | atcttctctg  | ccttctcttt  | cagcacgttt  | ttccataacct | tcaaaagcag  | atccaaaatc  |
| 4501 | atcaattttca | tctgaacctt  | ttgggtccgt  | gcctaaattt  | cgtgtcactt  | catttgattg  |
| 4561 | atcaggctta  | tcttcttctg  | ttggctgatac | atgctgtagt  | tgattaggct  | tgtcttcttg  |
| 4621 | ttctgtgctt  | agttctcgta  | ctaccttatac | tggtgacctt  | ccccctcgta  | gtcgaagagg  |
| 4681 | gtcgccttct  | tctagtggct  | gatcatgggt  | atctcttact  | agttccgtgc  | ctaactctcg  |

|      |             |             |             |             |             |             |
|------|-------------|-------------|-------------|-------------|-------------|-------------|
| 4741 | ttctacctta  | tttgattgat  | caggattgtc  | tttttctggt  | tctctctttac | ggcctatggt  |
| 4801 | gtcatcatga  | agcttattca  | agaaatcttg  | cctatgcat   | tttgctctaa  | aaagtaagtt  |
| 4861 | atttgataa   | ccatcttttt  | ctcctgtacg  | acggctaact  | cctatagaat  | caaggccatg  |
| 4921 | ctcccaagta  | aacttcatag  | catcttctat  | tgtatagccc  | aaatgtgatc  | ctacgtatcc  |
| 4981 | tttataataa  | tctaaatatt  | taccgatcct  | tctgtgtgta  | atatcttccct | tatcaactcc  |
| 5041 | aaatgccctg  | tagatctttt  | cctcaagttt  | atcaacgtca  | tttttaggtg  | atggtgcaaa  |
| 5101 | ttttgttgct  | tcaatagtag  | cacctacaaa  | tttacgtggc  | acatcaatag  | cgtatttcag  |
| 5161 | cactcctcca  | actcttggtg  | ctctccccag  | cagattagct  | gcacctccgg  | ctaactctatc |
| 5221 | cggtaaataa  | gtagcccaac  | tgcctaaaga  | ctcaagtcct  | ctaccagcaa  | aattttgcca  |
| 5281 | ctgctgtttg  | aattcttcca  | ttatgccagt  | caaaggcgat  | gcctgataca  | tactagatat  |
| 5341 | attgtaaacg  | ctgaatccac  | caccagcgat  | acttgagccc  | atttgttgta  | cgaactcgcg  |
| 5401 | taaagagaac  | attaaaaatg  | aaagcaggaa  | taatacaaa   | atttcccttg  | cattgattaa  |
| 5461 | ataacctctc  | tgtatgtctt  | gcaccttttg  | gtaatcacta  | ttttcttgat  | agtttctatt  |
| 5521 | taccttataa  | aaattctgtg  | attggcagct  | cccatcttgt  | ctaattatat  | cttgactata  |
| 5581 | agactttatt  | tcacttttta  | aacttggctg  | tagaattact  | ttttctatga  | tttccttgta  |
| 5641 | attagtagac  | ctgctttcat  | ttcctggctg  | cttacaatag  | atttctgtct  | ttttacttat  |
| 5701 | attattaatc  | aataataaga  | tatcagcttt  | ttctgatgca  | tgggataaac  | tatttgtaa   |
| 5761 | acgcactaaa  | tctttttacac | tacagctatt  | atctactacc  | atatcacttt  | ctgcaatata  |
| 5821 | atggctctgct | ggattctctt  | tagtaccagg  | aattgggtta  | aagaaaggat  | aatctatata  |
| 5881 | acgaaaccct  | ttttcaatgt  | aatccgggtg  | aagagggata  | taccagcac   | cgccagtaaa  |
| 5941 | ttttattgta  | ccaccttctc  | tgcttatctt  | ttctatacct  | tctatgttct  | tatctacgtt  |
| 6001 | cagcggagaa  | gcttctccaa  | gagtgttaag  | tacgaaaatt  | tgcctggggg  | tccaaccaa   |
| 6061 | gtactgctta  | tcaacgatac  | aaaaaccacc  | aaacacccat  | tttgagcac   | ataactttac  |
| 6121 | ctcgaacat   | ttattgtagc  | atacagtaaa  | acctaactgc  | ctataaaaagg | tattcattat  |
| 6181 | aatggaagcc  | agtaatgaca  | agagagcaaa  | tatcataatc  | gactgtaaac  | aaaagctgat  |
| 6241 | gcagaatttt  | atccaacctt  | caaataagact | tttcagcggg  | gaaaataaaa  | tagaaattag  |
| 6301 | aaacagtggc  | ataatggcta  | taagaaaagc  | tatacccata  | aaaccagaga  | gaaatattat  |
| 6361 | gtaagcatat  | aagcacagca  | agaagtatag  | cacaatccct  | atgaaaattg  | ccggtatcat  |
| 6421 | aagaaggctt  | gcccacattt  | ggtaatgtaa  | aaacgctgca  | aactttttcc  | aaacagaata  |
| 6481 | agcaaaaaac  | ttattgaaca  | tgtcctccat  | gaagctaaac  | aacttagctt  | catctccttg  |
| 6541 | aacaataactt | ccggtgttca  | tgttgggagc  | aaaattagta  | attatactta  | tcaattgttc  |
| 6601 | aagaccttta  | acaaataaaa  | caagaaaatg  | atcatagaaa  | aatctaaaac  | ttccaggaga  |
| 6661 | tataagcact  | attactagag  | tgattttcat  | cattctgatg  | agcatatcat  | gcttagtttc  |
| 6721 | ttgtataatg  | ccaaaaagat  | aaagaagcga  | tgaatcatt   | acaaatagaa  | caagcaagga  |
| 6781 | aagaacaaaa  | ttgtgaaagc  | tcgtactttt  | ttcagctata  | ttttcgaaca  | tagcttgtgc  |
| 6841 | aactgcagga  | tcattgctat  | taaaatgttc  | tttgcaattt  | tcgttaatca  | ataatacaca  |
| 6901 | ttttagatag  | ttataaatat  | aatcaaaaaa  | ctcaacccca  | ctcggttgcc  | gcactccact  |
| 6961 | taagaactca  | aaagagtagc  | cacctacatt  | atctaagtaa  | tatctatcta  | atattttttac |
| 7021 | atatatttttc | catccctttt  | ttaattttcac | cgggtcacaa  | tttctgtcct  | ttaatttagt  |
| 7081 | gctatctctg  | tctaaagcaa  | aaagaccgct  | ccatttctct  | gccacggagt  | tgtaacctag  |
| 7141 | atgtacagta  | ggagatgaag  | gattgcgcac  | agattttcaa  | tctttgttag  | gactatcgct  |
| 7201 | accaggcctt  | tgaacacaaa  | gataagcacc  | atgaccgttg  | gtaaaccaac  | atggagcacc  |
| 7261 | acgtgatact  | gtattttgcg  | tatcatcttc  | attaatgcac  | ttgcacttta  | cagtgcact   |
| 7321 | tgcattagac  | ttacttgaaa  | ttttctgtgg  | cgcactaggt  | ttgtaatcat  | tacaaactaa  |
| 7381 | gtgaaagtca  | ggtagactat  | tatcacctga  | cttgccctca  | aatttagttg  | catattttta  |
| 7441 | ctgctccaag  | ctttgttaag  | tataactgcc  | tttttttagat | tccttcttgt  | tattattact  |
| 7501 | ccaagatgtc  | catgcaccat  | tactcgcac   | ttttaaaacta | tctccattgg  | tttcgagccc  |
| 7561 | ggtatcctcc  | cactccacca  | cttggttatg  | gtgaaaacca  | taatttaattt | caccagtttc  |
| 7621 | aggatcaaca  | acttctccat  | ctcctggaat  | aaacgcacgc  | tggctgcttg  | aaaaatgagc  |
| 7681 | gcttactgca  | ataggttttag | gacaaaaata  | gtcagcagat  | atacaccttg  | gaaaaggcat  |
| 7741 | atcgtttttta | ctacaacctg  | tgatcagcac  | ataagctgca  | agaagtaata  | ccctaaacca  |
| 7801 | acatttgcct  | aaacgtgatt  | gcataatctaa | actttttcca  | aatacagaat  | aaatttctaa  |
| 7861 | aactttactt  | aaaatatctt  | tttaatttagt | tactccataa  | tatcattttat | atcttactcc  |
| 7921 | tctccatttt  | cttccttggt  | tttagcttta  | gcactaggat  | cacttcttat  | tgtttcatca  |
| 7981 | aaattttttt  | gctgatctga  | ttgttttaat  | gttttaggtc  | tatcactcgt  | tgttttatca  |
| 8041 | gaacttcctt  | tagaatcttc  | ttttttgtct  | ggttgctttg  | gtgtgttagg  | taatttagcc  |
| 8101 | tcaattttttc | cccgatcttt  | actcattttc  | tgcttgatac  | tctgtatcat  | actttgggtc  |
| 8161 | ttatcatcaa  | ggccaacggg  | tgacagcata  | gcttgcatg   | cgctcttagc  | aactgtacca  |
| 8221 | acaccgccag  | taactccata  | accagagcta  | aatagtgttt  | gtaccatagt  | ttccgatata  |
| 8281 | gaaacaaaag  | cttccattgc  | accggcaata  | atgaggtata  | taaacgcctg  | gattaggtct  |

|       |             |             |             |             |             |             |
|-------|-------------|-------------|-------------|-------------|-------------|-------------|
| 8341  | ataggtaatg  | ctgcaaagtg  | tccaccagcc  | ctttctccgg  | tactgagtgc  | aacatcaacg  |
| 8401  | ctagtgccag  | gactgtatcc  | aagaggcagt  | attgatttca  | tcaagcacag  | atcatacgat  |
| 8461  | aagaaattta  | cgctaattaa  | acattgatag  | catgcagaaa  | aatttgtgag  | gttatataaa  |
| 8521  | actgaataca  | tcaactgatt  | taaaagagat  | aaaaatgaaa  | ataaaatgac  | tggttctaata |
| 8581  | gaaacatgag  | ccaacgtttt  | tatccaatta  | tcaaaccaagg | gtttagtctt  | ttgaaataga  |
| 8641  | ataaatacga  | taaataaagg  | tggttaatgac | agtaaaaaacg | ctactagaac  | agtagatatt  |
| 8701  | acataatttc  | atgtagcact  | aataatgcat  | tttaaaaaacg | cataagtagc  | gcagagtatt  |
| 8761  | gccaaaaaatg | caataacgcc  | aaaaggacca  | gaaagcatca  | acgataaaaa  | ctttagccaa  |
| 8821  | gtttctgctg  | tgaataatac  | tcttctgtgc  | aagtctaaga  | atgcaaattt  | tctctcccct  |
| 8881  | tctcctacat  | agccagaaaa  | actatcaact  | aaataagtgc  | taccatctat  | aaaaagtctg  |
| 8941  | gataaagttg  | taccaaaaaag | ttcccagctt  | ctatcgctaa  | aggcaaaaagc | tataaatgct  |
| 9001  | atcttgaaca  | ttcttacaat  | gaaatcaaata | ttacttagct  | gtattgttcc  | aagcatatag  |
| 9061  | ccaacgacag  | taaatataac  | gtatagagta  | agcaaagctc  | ttacccttg   | aagaagacct  |
| 9121  | cttgcatatc  | ctttgtatga  | atctttaacg  | ctgtcccca   | ttacttcttc  | ttttataagt  |
| 9181  | ttaaataccc  | cgtttacatt  | cgatgaaata  | aaatcattaa  | tttttctttt  | aacaaataaa  |
| 9241  | gttactgtgt  | acttattatt  | ttcataatat  | ttgccatttt  | tatctgtaata | gtcatctctc  |
| 9301  | tctacgttgc  | ttacattgat  | gccgaaatat  | atcttcttag  | attcttcggt  | ctgaaagtgt  |
| 9361  | tctccgctta  | ttacatctaa  | tatggtgtac  | tcatcttttc  | cgtttactct  | ttctctcact  |
| 9421  | cctaccactt  | taaaatcatt  | agttcccaca  | ccatgcaaat  | ctttaggtgg  | ctcatcacct  |
| 9481  | aaatatacat  | ataatttttc  | gccattaata  | tattcacatg  | atctagtcac  | cttaacatgg  |
| 9541  | taccctcctc  | tattatagta  | ataatgacca  | taatctgcga  | tagcgagcat  | cacactacta  |
| 9601  | ccgggcgtta  | cctcgtcatt  | tactggataa  | tcattgttca  | attccagaga  | aaaatcctcg  |
| 9661  | aatttattgt  | tatcgccaat  | ttgcaaacac  | atattatccc  | cttttgacc   | ctctttcttt  |
| 9721  | ggaagacatt  | gaataccttt  | agcgatattt  | ttatcatcag  | gatcaccaat  | ttttgcaaca  |
| 9781  | agagcctcag  | ccaagattt   | atcatcttca  | gtaaaactac  | ctgctttaac  | attcccttcc  |
| 9841  | atTTTTTcta  | gataagaata  | catatcacat  | ttatttcctt  | tatcgtaact  | cttatacctt  |
| 9901  | atagaggaga  | cacagttccg  | ttctcctgct  | tgacctaaac  | catagttcca  | tatacccttc  |
| 9961  | tcagtatagc  | atataattttg | atggtaacag  | ttaagctcat  | aggaggagta  | cttttttctc  |
| 10021 | tcataagac   | tacagttttt  | tccatcacat  | aactcgttca  | atcctatttt  | agcgcggcgt  |
| 10081 | aaatcaagta  | gtgaaccata  | taccatgggt  | tcgttgtctt  | gaatataacc  | tttattaaaa  |
| 10141 | tgcaccttat  | tatcatatgg  | ggtataccca  | ttgccaacta  | gcactttgct  | ttcctttgct  |
| 10201 | tttgttttat  | caagaggtaa  | aaattgtatt  | ttattttttg  | taccatcttt  | accatcacaa  |
| 10261 | aaaaactctc  | ccccctgatg  | tacttcactc  | actgtagctt  | tcttatatac  | agtttcctta  |
| 10321 | cggtcatttt  | ctacagcttt  | ataacaattg  | tcatcaaaat  | tgatgccttt  | cccttctgga  |
| 10381 | ttgtcgtaat  | caattgttat  | ttttctggga  | actaaagctga | agcttaactt  | gtcaccagga  |
| 10441 | tttactttta  | ttccagtgtc  | cacataacgt  | ctattgctgc  | caaatccttt  | gccaccacat  |
| 10501 | agttcgtttt  | tactttcatt  | aacaccataa  | ttgttaggta  | cactattaat  | atccgcagcc  |
| 10561 | ttactataat  | ttggttctga  | gccatcagca  | caaaagctag  | ctggcacaag  | tactttcctt  |
| 10621 | ggattttttg  | cttcttttaa  | agggcaaaaa  | tttactgatc  | catcgagggg  | gaatttgatt  |
| 10681 | ttctcaccct  | gactaattac  | ctgaccagaa  | tcaacccaat  | gaattttatc  | ggctttacga  |
| 10741 | actggaacat  | ccacattaac  | gctggtgttt  | ttgctctgca  | accagggctc  | gacacaatcc  |
| 10801 | atattacaac  | cagtgtattgc | aagacacagt  | atcaataata  | gtgatctttt  | acttatcatt  |
| 10861 | gctgtcttcc  | tggttgtggt  | atctgaggcg  | ttgaccttgc  | agtccttctg  | ggatattgag  |
| 10921 | gtcttgacgt  | acctgactgt  | tgagaggcat  | ctcctctttc  | tcttctttga  | acgcttcggt  |
| 10981 | catctaacc   | tactgttccc  | attaagcttt  | gttgatactg  | tcttccagggt | tcgcttgcta  |
| 11041 | cataagcacc  | aaacaacgag  | tcagatattg  | ccgaagaagc  | ttcaactaaa  | gctttcatag  |
| 11101 | cgtgtcccaa  | aataacaaaa  | gccatcatag  | cggtaatatt  | aggtgtatat  | ttggaagcat  |
| 11161 | aaccataaaa  | aatacaaggg  | ttaaaaatct  | ttagggttaat | attaagtata  | catgtagagc  |
| 11221 | agacctcaaa  | atcaaatact  | gaatacacaa  | tataatccat  | aacctgactt  | atcagtata   |
| 11281 | taaaaattta  | aaggaccact  | ggatgaattg  | caaatcttgc  | taaaattttta | accaggtttt  |
| 11341 | gaaacatctg  | cctagtatac  | gcaaataaaa  | gacaaataat  | aaaaatagggt | gctaaagaaa  |
| 11401 | gtaataacgc  | aactattgct  | atagatgtaa  | taaaagaaaa  | taaggcatta  | aaaatagata  |
| 11461 | agctcactgt  | gattaaaccc  | caaataacca  | agcaaaaaaga | tacaatgcc   | aaagggccag  |
| 11521 | aaaatataag  | agatactatt  | aacaatactg  | aatgcatga   | caagaacct   | ttgagcggca  |
| 11581 | aatcaagaaa  | ctcaaaaaca  | tttgaagtag  | tgccctctaaa | atltgtatt   | tctattagtt  |
| 11641 | gttttgaggt  | gttaataaat  | atagagaatg  | cgttgttata  | aaaaaaagtc  | cagctattat  |
| 11701 | cctgcaatag  | ctgagcgatg  | attcctatct  | ttacgcata   | aattaaaaac  | tcatatatag  |
| 11761 | aaatatgagt  | taatccaaaa  | aagtaataaa  | gagtataata  | gattatata   | agtactaata  |
| 11821 | gtgatattat  | agtagatcta  | atggatattg  | ttctgcttga  | ttttataaaa  | ctttcgtaaa  |
| 11881 | gagactttac  | aggactagta  | tcagagtga   | ttgcgttagg  | gtctttataa  | ttagagccga  |

|       |             |             |             |             |             |             |
|-------|-------------|-------------|-------------|-------------|-------------|-------------|
| 11941 | aaaatgcagt  | tttcaactttt | tcatcaaaga  | aattatatat  | tgcactaaaa  | gtttttgtag  |
| 12001 | gtggctcttg  | agttgttagg  | ttaatgctaa  | actgaccttc  | atttttgtaa  | tcgcagccat  |
| 12061 | ggtctcttat  | tccgtaatat  | atgggtgcctg | ttttgtcttt  | taattttccct | ttcaagtttt  |
| 12121 | ccatgtcatg  | aactttgctg  | atatctacag  | atatatccgc  | ttgattttca  | ccaggcttat  |
| 12181 | gctcagggaa  | tttatcggaa  | acacttatat  | acaagctatt  | ttccagacta  | tggttcttcg  |
| 12241 | ttactcttat  | gttgaacccg  | cctttgtcat  | ttgtattgta  | gcagctcttg  | tcatttctgc  |
| 12301 | tacatagact  | aaaagttaaa  | cttggtattt  | gatgggtcatt | ctccatctta  | tgatcacaac  |
| 12361 | tagtacataa  | accaccacct  | ggaatgtggt  | caagagtttc  | attatccata  | ccaactttta  |
| 12421 | gaaatgtaat  | gtcagttttt  | acctgttttc  | cctttaatac  | gttactaata  | atttcagcaa  |
| 12481 | caacagattc  | accactagaa  | tttaaagcat  | tgaatagctc  | aatttctata  | ttattatatt  |
| 12541 | caatatacac  | gcaatcctcg  | cctctacgac  | cagaagaaaa  | tttacatata  | cgtctacaga  |
| 12601 | gtgaatttaa  | aatgtgcgta  | tctatcttac  | ttgcactgct  | ctctgaaagc  | ttgctgcaat  |
| 12661 | ctatattctc  | tccttgtttt  | atagagttaa  | taatattttc  | aatttccctt  | tttctttcat  |
| 12721 | cttgatctaa  | cttcgaaaac  | cagtactctc  | ttccactcaa  | ccattgcgca  | tcgcctatta  |
| 12781 | tatatattat  | aggacatatc  | ccatccttgc  | caccttggca  | tttctcttga  | tttaaaacat  |
| 12841 | gtgcaaaatg  | ttccgtttct  | tgctcgctac  | acttttctgc  | gattttcaaa  | tacctgattt  |
| 12901 | ttgtctcact  | ctctttatct  | ttacacactt  | tacttccaat  | cacactaaag  | cttatcgtat  |
| 12961 | cgcctttttt  | aagtgc aaat | ggtaatgcaa  | cgtcatttct  | cccaggccca  | attgcaaaat  |
| 13021 | ctgcatactg  | cttaggacaa  | aaattaacct  | tactaggcac  | tatatcaatc  | tctgttactc  |
| 13081 | ttattctatc  | tgagatatta  | acaccagaat  | caaccatttt  | ctgctctggt  | gacactatat  |
| 13141 | ctagtttttc  | acgcaaacct  | gataaatttt  | ctggcttaat  | acagtgatgt  | tccccgcagc  |
| 13201 | ctgacagaaa  | aaaaaacggt  | attatcagca  | aaaatttttag | cataaatcca  | actcattcag  |
| 13261 | tgcttttgggt | aacactctcg  | gagctactag  | aaccagaacc  | tcgagattta  | ctcttgtctc  |
| 13321 | caccactcaa  | cttcttagca  | gcagcaccag  | caactccagc  | aacaccccca  | gcagcagctt  |
| 13381 | tggcagcaga  | taaagctttg  | cccaccattt  | gtccaggtgt  | ctgacctgag  | ccaagtgtctg |
| 13441 | ctctatgggt  | accagcaagt  | tcagcagcca  | tgccaggaag  | aatgtttaaa  | aagtggtaaa  |
| 13501 | agaggaataa  | tactaaacac  | aattttaata  | attctccgat  | gagagagctg  | ccaaactcca  |
| 13561 | tgtatgtaaa  | gtcgaataga  | ccaagtatgc  | tgctcttttt  | aaagctataa  | ttttgcatca  |
| 13621 | tacatgcaag  | agtagtttca  | tttttatcac  | attcccccac  | tttcaattta  | aaccactggt  |
| 13681 | ttttcttact  | atatgagatt  | tctgcttggt  | tcttttccata | tgacttgtcc  | ggttgttcat  |
| 13741 | ttttatatga  | ctcgtccagt  | tcaaaattta  | aatttttaaa  | atagatttta  | tcacatgcta  |
| 13801 | tgaacataaa  | ggacaaaaac  | gcaaaaagga  | taaccgggta  | taagctatag  | gtaatcaact  |
| 13861 | ctttcaccca  | gccttcaaaa  | tatccttttg  | tgtgttgga   | taaaaccata  | ggaatgaaca  |
| 13921 | aagggtgataa | aatgatgatt  | acacttaaag  | caactagaga  | taaaataaat  | acatagcaca  |
| 13981 | gccacaaaaat | aaccatcatc  | atcagaacgg  | ccataaatat  | acagacaaga  | gctactaaaa  |
| 14041 | tttgtccacc  | agcaaaaaata | ataccgatta  | ccgaacctgc  | aactaataag  | acaggagcag  |
| 14101 | caccaagcaa  | gactgctaac  | gttgcaacac  | ctccagtacc  | aattttgcca  | ccaattccat  |
| 14161 | ctaaaggggc  | acctaaataa  | aataaaaattc | tacaatcaag  | cctatcccaa  | ggtgcaagat  |
| 14221 | aactgtaaga  | taccctcttt  | cctgcacgag  | tatatccata  | atctgtacct  | gctttataat  |
| 14281 | tacatatgcc  | tttactttca  | gatgatgctt  | ttagcactat  | ctctgacaaa  | ccatttgaga  |
| 14341 | gacgagttaa  | ttctccataa  | taatgagaaa  | tggtactgcc  | tgttgtgaag  | taaatcacta  |
| 14401 | aagcgaattt  | tatgatcaac  | atatacattt  | cttgaggcct  | ctgaactcca  | ccagacatgg  |
| 14461 | cttttataga  | gaacagtatt  | aaagctaaaa  | ctaaaacagc  | agttacagtg  | tttttcagcc  |
| 14521 | ttttctgtgc  | tacagatata  | aaactctcac  | catttggtgc  | acctttacct  | gcaactaaat  |
| 14581 | tatctaataa  | ttccttaaatg | cattgcacta  | tcatagaagt  | tacgggaata  | ggagctaata  |
| 14641 | atttactccc  | tgcttggtta  | taacaagctt  | cagaaacata  | cgagctaaaa  | cagccagcat  |
| 14701 | tatcataacc  | tacaaaaaatt | ttccccctt   | gtccggttag  | tcctttttct  | ttagatctga  |
| 14761 | taatagtttt  | atagtcatca  | ttattaccaa  | tagtaacttt  | ttcctctcct  | gtaccatctt  |
| 14821 | tatttttgaa  | tatcatcaca  | gattttttcac | acataggagc  | aagtgggtca  | ggtggcaatt  |
| 14881 | ccgtgcaccc  | catatcaaac  | ccttgcggcc  | aaggagtcatt | ttcgatacca  | agcatgctaa  |
| 14941 | cactggctaa  | ctccacacat  | aatctgcccg  | tttttctcac  | tgctttgaat  | gtagctccat  |
| 15001 | gtatgggttc  | gctctgtcct  | gctttgagaa  | ctctacattc  | cagaccacca  | tcaaccttcg  |
| 15061 | aggaccatga  | cccatctacg  | tatccagtggt | ctttctccct  | gacatcaaaag | tctatgtatc  |
| 15121 | caggtttttc  | tctggaatta  | aagtctacct  | tattaaaaag  | attacaaaaa  | gttaaagggt  |
| 15181 | ttcgatgaca  | tacttctata  | tattcactgt  | attgcacacc  | attttttggc  | cagtaataac  |
| 15241 | tctctgtact  | ctcctgaacg  | ttagaattta  | aggetttctt  | ttctgctctt  | ttcccgctcat |
| 15301 | aatctttttt  | gttcacgtct  | tcccagactt  | tattttgcaa  | acaagaaaaa  | tattcctctt  |
| 15361 | ctgttttggt  | attttcattg  | gtgcagccac  | tataacctgt  | gtcttctaat  | ttaaaatttt  |
| 15421 | tgtatttttc  | atcatggtca  | cgtgcaactg  | ggtgtttaac  | aaaactatgt  | tcacaaaaca  |
| 15481 | caagtcctcc  | tatagctttc  | cagactccaa  | caattgcagc  | tatcattcca  | acaataacaa  |

|       |             |             |             |             |             |             |
|-------|-------------|-------------|-------------|-------------|-------------|-------------|
| 15541 | gagcggtaaa  | caaaccagca  | gaagaaacga  | tcaaaacaat  | gccagtaaat  | attgcgccaa  |
| 15601 | cagcaatcgc  | tattccagca  | agtgtctgcag | ctgtttttaa  | cgctccacaa  | tcaggattag  |
| 15661 | aggcacgact  | aaaactgcc   | gtggaattaa  | atctgctaac  | aaattctgtc  | ttgtcagtac  |
| 15721 | cacttactcc  | atctgcaagc  | actggatatg  | agagtaaaaa  | gtctatatatt | agtaaaaaata |
| 15781 | tcgcaattaa  | tagcaatgac  | agcttagtct  | taaacatttt  | ttaccttctg  | ataaaaatata |
| 15841 | ggcaaccata  | cttttggtt   | gtccccaact  | tcatttaata  | tatcgtgtaa  | caatagaaca  |
| 15901 | ctttctgcac  | gtccggataa  | tacgttgatt  | atatcatcca  | ggccttttaa  | gtctatttcta |
| 15961 | gctactacag  | cattgactcc  | ttgtttcacc  | aaaaagaatc  | tagtactcgg  | atctgtgtgc  |
| 16021 | ttaattaata  | tatattcacg  | ttcagttaac  | ataaaaacat  | cccgatagac  | actagtagct  |
| 16081 | ttcagatttg  | gtaaaaaaat  | ctgtgtcgct  | gtttgttgta  | caagcgtatc  | gctaatagta  |
| 16141 | cttttacttg  | catcctcaac  | actctgagta  | gcaaaaaatca | caaaagcatt  | tagttttctc  |
| 16201 | agtaccttca  | accagtcttt  | tatcttgggt  | gcaaaaaactg | gattatctat  | taacgccc    |
| 16261 | gcctcatcaa  | gaacgataat  | agatggagtg  | ccatcaagag  | atatacta    | cctatgaaat  |
| 16321 | aaataaatca  | agaccggtcc  | aagagcaaca  | ggatctttga  | gcaagctagc  | catctcaaaa  |
| 16381 | ccaaatactc  | ttgtctgtga  | aaaatctagc  | aaatcttctt  | tattgtcaaa  | tattgcagca  |
| 16441 | tgagaaccat  | tatcatgcc   | catagatatt  | gccccagcta  | gagtatcagg  | acctgcaagc  |
| 16501 | cctaaaaacg  | gtacgaggtt  | tctcaagaat  | ctgtcttctt  | ttcttaattt  | aaaatttctt  |
| 16561 | tcaattgcat  | cattaattcg  | tgcaatatct  | tctgaagtaa  | atztatcatt  | atataccgaa  |
| 16621 | attaaagact  | ttatccactc  | cattaaaaaat | gttctattat  | cagaggtatc  | atcaagttgt  |
| 16681 | aaaggattaa  | aatttgtttt  | agttcttgggt | tctattacag  | tatagatacc  | actaagtgtc  |
| 16741 | cttaagaaaa  | tctctgcacc  | gcatcttcta  | tcaaaaaaga  | atatccttgg  | agaaaacttc  |
| 16801 | atcgcttggg  | cacacaggaa  | attcattaaa  | acagttttac  | cagcaccagt  | tgggccaatt  |
| 16861 | atcatagtgt  | gtccaacatc  | ccttatatga  | aagttgaaaa  | aaaatggagt  | accagatgtc  |
| 16921 | gtgtcaaaaa  | ctgtaacggc  | atctcccag   | tggttattga  | atztatacc   | agtaggataa  |
| 16981 | ttatgttgag  | atgcaaattc  | agccaaatta  | agactactta  | ttgtagcttt  | tctcactata  |
| 17041 | taatcgaaat  | taccaggaat  | ttgcgcccc   | aatgctgggt  | caagggtaac  | tctctcacgt  |
| 17101 | atagggtaaa  | caccgcaatt  | agaaagctct  | gattctacca  | acgacagagc  | gttatccaat  |
| 17161 | gatttaggac  | ttttttctat  | acataaaaata | gtcagggtgat | gttgaccaa   | cgcaatctta  |
| 17221 | ccactcattg  | cgatcatcaag | cgcttgagaa  | atctctgcta  | tttgagaaat  | agctttatct  |
| 17281 | gcagactgta  | tcattcgatt  | ttgctgtatc  | tgcatTTTTT  | caatcgccat  | ttgcctgttt  |
| 17341 | ataaattgaa  | aagattgcgt  | aattataaac  | tcgtaaggaa  | gttgtaaaaa  | cgaatcaagc  |
| 17401 | attcctgcag  | aagtatgatt  | tccatattct  | ttgatactaa  | ttattccagc  | atatttactc  |
| 17461 | tcattatgag  | tcacaacctg  | tatcatctta  | cggccaaaga  | ataacctatg  | tactggtaag  |
| 17521 | tatcttgata  | tttcagttct  | tagcggaaaa  | agcgtatttg  | taacgaagcc  | acaatttacg  |
| 17581 | attctagata  | gaaactccat  | tatttcgcag  | aacaaacat   | ctggagtttc  | ttttactcca  |
| 17641 | agaatttttag | ggaataaatt  | tctaaggctt  | gtcactacac  | gatttgtcgt  | ttcctctaaa  |
| 17701 | tcttcatacg  | tggcacgtat  | atcactttcc  | caagcatgtt  | ttgaagttac  | atgtccgaat  |
| 17761 | tttttttagta | gatgtgacaa  | aaattctact  | ccttttgtgt  | ccgctctacg  | gataatcgta  |
| 17821 | atgtataggt  | cattaataaaa | tgattgcctt  | gttgctgtgt  | tttctctcca  | ttttagattt  |
| 17881 | acgtgattag  | cgaaaaaatt  | cggcaaacct  | tgacttgcaa  | attcatcaga  | aaaaatattt  |
| 17941 | ttcttacgtc  | tgatagtatg  | aaaatacaaa  | ctaaatgccg  | gagatgaaat  | gcttcttagc  |
| 18001 | atctgattcc  | tgatgttggt  | ctgtatgact  | aaatcctcgt  | catcggcagt  | ttcaaatgca  |
| 18061 | aaaccactta  | atttttataac | cttaaccaac  | caattttctt  | ttgtcatcaa  | ggttgtgcta  |
| 18121 | ttccaatagc  | aagaataagg  | aataaattca  | gcagcgtgaa  | cttccctggt  | cagagtagat  |
| 18181 | ttattctttg  | attgaatagc  | cctaaacctc  | agcatcacac  | aacgttaagc  | aatatcataa  |
| 18241 | gaattggctc  | catggtaaaa  | acgattttaa  | catttcgagc  | actttcccaa  | ttttaccata  |
| 18301 | aataattcaa  | taaacaacgg  | ttcttttgca  | gaagctatat  | aaccaagtcc  | atgtataacct |
| 18361 | ggtaacatta  | agagaatcac  | tcttaaatca  | tttgaattaa  | tgaaaattag  | catgcaaatc  |
| 18421 | aggacgttta  | atattgcaaa  | catataactc  | acaccaaaaga | gcattgcagg  | tcttgaaga   |
| 18481 | cctttaaata  | attgatctgt  | ttgtatacta  | cctgtggaca  | tatctttaac  | cttctaataa  |
| 18541 | tagctctaac  | actaatacta  | tatcattata  | ttaaaaaatcc | attgaaacta  | gtagcacttt  |
| 18601 | aagttaagat  | acattatttta | atcccagata  | tgacaagttg  | gccatttcaa  | gaagcagaaa  |
| 18661 | aatatttgca  | agagtttcct  | aataaaaaaag | aaataaatatt | tgaaactggt  | tatggacctt  |
| 18721 | ctggttttacc | ccacatagga  | acctttggag  | aggttttccg  | cactacagtt  | attgtaaatg  |
| 18781 | cattaaaaaa  | aatagctcct  | ggtataaaaa  | ccaaaatcat  | tgcaagtttc  | gatgatattg  |
| 18841 | atggtttgcg  | aaaaatacca  | gataatgtgc  | caaatcaaga  | gatgctaaga  | gagcacttaa  |
| 18901 | ataaaccatt  | gactatgata  | cctgatccat  | ttggcactca  | tcagagttat  | ggtcatcata  |
| 18961 | tgaattcatt  | gttgtgtaaa  | tttcttgata  | tgtttgaatt  | tgaatacgag  | ttcaggagtg  |
| 19021 | caacagagtg  | ttataaatct  | ggcgttttac  | atgaaaaaact | tttactctta  | ctgaaaaaatt |
| 19081 | atgataaagt  | gatggacgta  | atgcttccat  | catttcggga  | agaaagacag  | cagacttata  |

|       |             |             |             |             |             |             |
|-------|-------------|-------------|-------------|-------------|-------------|-------------|
| 19141 | gtccattctt  | gccaatatgc  | ccaaaaactt  | ctcaagtttt  | acaagttcca  | gtaattgaaa  |
| 19201 | caaatacaga  | gaaaggaaca  | atcacatatg  | aagacccaaa  | cgggggaaaa  | atagaagttc  |
| 19261 | cagtgacaaa  | aggaaaatgt  | aaactgcaat  | ggaaacctga  | ttgggggaatg | aggtgggccg  |
| 19321 | catttgaggt  | aaattacgaa  | gctcacggaa  | aagatttaac  | tccatctgct  | gtgctttcaa  |
| 19381 | gtcaaataatg | tgaaatactt  | ggagaaaagc  | caccacttct  | gttttgctac  | gagcttttcc  |
| 19441 | ttgataaaga  | aagaaagaaa  | atatcaaaat  | caaaaggaaa  | tggcattttca | attgaagagt  |
| 19501 | ggctaactta  | cgcaccaaca  | gagagcttag  | cattgtacat  | ttttcagagt  | cctaaaaaag  |
| 19561 | ctaaacgttt  | atattttgat  | gtgataccaa  | aatcaactga  | tgaatatatta | gaatttgtaa  |
| 19621 | agcgttatca  | tgagaacaaa  | gaaaaggata  | taaataatcc  | tgcttggcac  | attcaccagg  |
| 19681 | gcaatgttcc  | cagtatagaa  | acttcaggca  | taaatttctc  | actactttta  | aacctagcag  |
| 19741 | cagcttgtaa  | tgctgaaaac  | aaagagatcc  | tatgggggtt  | tatatcctct  | tatgcaccaa  |
| 19801 | acgttacacc  | agaaaataat  | aaaatgcttg  | atagactttc  | agacttcgca  | gtaaagtatt  |
| 19861 | atcacgattt  | tatcaagcca  | acaaaatcat  | ataaaactcc  | aaatgaaaaa  | gaaaaagcag  |
| 19921 | cgttactaga  | tttgaaggac  | actttacatt  | ctctatctac  | aactgctact  | gctgaagaaa  |
| 19981 | ttcaatctca  | ggtattttct  | attggaaaaa  | aatatgatta  | caccaactta  | cgtgactggt  |
| 20041 | ttcagctatt  | atatgaaacg  | ttacttggcc  | aaaaaacccg  | tccaagaatg  | ggatctttca  |
| 20101 | taaagcttta  | cggaataggt  | aatacgattt  | ctctcataga  | aagcgctact  | aaatgtatac  |
| 20161 | tttagagttt  | acctcctttc  | atttgagctc  | tttagtttta  | ataagaatcc  | cttgacaaac  |
| 20221 | tccgctagcc  | cccttatcat  | gaaactgaag  | ctattgtatt  | tgctttcgcc  | aatctgcaga  |
| 20281 | ttaaaaggta  | aggattactt  | aatgtatcgg  | cgtcttatgt  | tcaatttttt  | gcagtatata  |
| 20341 | gatactgtat  | gtctttacaa  | aacttcatct  | acatctagat  | ttttatctaa  | ataagctgaa  |
| 20401 | cgcgcttata  | aagcgttaca  | agacatcaaa  | aaatgccaat  | actcgacaga  | gatagtaaaa  |
| 20461 | gactagctaa  | ctcggggatt  | ctttgtcttt  | ttttctgctt  | agtaaatttc  | ttaaacattt  |
| 20521 | gcagcgtaag  | ttagttgcaa  | ttaaaagcgg  | ctgaatctcg  | cttgtcaagc  | gtttaaaaca  |
| 20581 | taaaaaacgc  | caatatttta  | aagcggataa  | taaccccagg  | gcttcttttg  | cctttttttt  |
| 20641 | cacttggtaa  | atttcttaaa  | tatttgtggc  | taaacgacaa  | ccgtcatccc  | gctacttggt  |
| 20701 | agcggctgag  | ataccgcgaa  | tgaatcgcgg  | tatgacgggt  | cgcgggcgga  | tgacgataag  |
| 20761 | gtttatacct  | tgatcatcca  | gtgcttgaca  | ctgggatcca  | gctttcttta  | taaattcacc  |
| 20821 | aaaagtgctt  | cattctataa  | cgcaaaaccc  | atactcacca  | aatccaatgc  | attacttgca  |
| 20881 | attaagtttc  | ctggatccca  | gtgtctgggc  | actgggatga  | caccatcata  | aaggaatcag  |
| 20941 | tgtcagctac  | tttcatgaca  | ccattctttt  | tcttggatcc  | aagtagtcga  | gctacttgga  |
| 21001 | tgacagctag  | cctgacaacc  | gtcatcccgc  | tacctgttag  | cgggatctat  | gctaagagat  |
| 21061 | accgcgaatg  | aatcgcggta  | tgacggtgta  | gacgatgggt  | aagtatcccg  | ctgcttggtta |
| 21121 | gcgccgcggc  | ggtatgacgg  | ttcgtgggtg  | tatgacgtag  | agtgcctaga  | agctgctatt  |
| 21181 | ttgctacaaa  | tggtctgtaat | ggcatcatct  | attttattgc  | tatcacagcc  | tgtttggtgca |
| 21241 | agttcagcgt  | tcccaccaca  | atttttttca  | actgctattg  | atactagttc  | ttttgcaacta |
| 21301 | attttatttag | ctaagtcttt  | acttacttta  | ataatcaaga  | ctgtttttatc | tttttctggt  |
| 21361 | gccgtgaaag  | ctattatcgt  | ttttggtttt  | tgttgctgca  | aaacaaactc  | tcttattata  |
| 21421 | ttcgctggaa  | tattggtaaa  | agcatgactt  | acaaaattta  | ttccattttat | ttcagtgcctt |
| 21481 | tttatgctct  | ctgcgcttat  | aagtttttta  | tataaatttt  | ttatttttagc | ttcagattct  |
| 21541 | ttgcgctctt  | gattttaaaat | atttaatcgg  | tttattattt  | cacttgctgg  | tgcttttacg  |
| 21601 | aattctgcaa  | cttttttttaa | gttaattttca | ttatcacgta  | cataattgat  | tgcttctctga |
| 21661 | ccagttaaag  | cttcaattct  | tctcactcca  | aaagcaacag  | aactttctgt  | tactatctta  |
| 21721 | aataaaacca  | tttctccagt  | atgttcaacg  | tgcggtgccac | cacacagttc  | tcttgaatct  |
| 21781 | ccaatcttca  | ctactcttac  | ttggttgcca  | tattttttcac | cgaataacgc  | catagctcct  |
| 21841 | tcgtctattg  | cctgattcat  | gctctgaatt  | ttttagtagc  | tagaaaaggt  | ttctctgatt  |
| 21901 | agagagttta  | ccatatcttc  | tactaagaat  | agctgatcct  | gagtaacttg  | agtggtatga  |
| 21961 | ctaaagtcaa  | atcgtaactt  | atccggtgca  | actagggaa   | ctttttgagt  | gacatgggtca |
| 22021 | cccaagattt  | ttctcaatac  | aaagtgcaaa  | aggtgtgtag  | ctgaatgatt  | tcttcttaag  |
| 22081 | gtttgccttc  | tttccttgtc  | aatgcttgct  | gcaactgtgt  | tacctttaca  | aattgaaccg  |
| 22141 | aacttaacta  | tgcatctgtg  | caaataatag  | tcattaacct  | tattgggtatt | ctcgactata  |
| 22201 | ataatacttc  | tatcagattt  | gatcagactg  | ccagtatctc  | ccacctgtcc  | acctgactcg  |
| 22261 | ccataaaaaag | gtgtttttatc | aagtataatg  | gttatctttt  | ctccctcctt  | tgcagaatca  |
| 22321 | attacttcat  | tttttagagga | aactatagct  | agtatttttcg | catcattttac | ttcattgaac  |
| 22381 | tcataacca   | caaattttgt  | tttgccaaat  | ttatcgatca  | aatcaaacca  | tacttgctca  |
| 22441 | acagattttt  | caccagatcc  | agcccattta  | gcacgtgctc  | tctcttttttg | ttctcccatt  |
| 22501 | gcatcatcaa  | aacccttctg  | gtcaaaattt  | atttttttct  | cttttaaaat  | atcaagtgtga |
| 22561 | atatccaaag  | gaaatccata  | agtatcatat  | agcttaaacg  | ctaattctcc  | aggcagagtg  |
| 22621 | tcacctgggt  | ttaaatctgc  | agtgaatttt  | tccaatagac  | taatgccttt  | catcaaagtg  |
| 22681 | tcttttaaagt | tttcttcctc  | tgattttaac  | gtcgtttcta  | ttaagctttt  | agctctgact  |

|       |             |             |             |             |            |            |
|-------|-------------|-------------|-------------|-------------|------------|------------|
| 22741 | aattcagctc  | ccatataagc  | cgaactcgtg  | ctatctatca  | acactggaaa | aatacgatgg |
| 22801 | agtagggaat  | cattatatcc  | aagcaggtga  | atataacgtg  | tggctctcct | aattaatctg |
| 22861 | cgtaatacgt  | aattcctgcc  | ctcattttcca | ggaagcactc  | cttctgcgat | gagaaatgca |
| 22921 | gccgcgcgaa  | gatgatctgc  | tacgatctta  | tgcgctattt  | tatcttctgt | tcttccacaa |
| 22981 | tactcttgag  | atctatctat  | caaagcagaa  | aataaatcaa  | tatcatagtt | atcatggacg |
| 23041 | ttttgcataa  | cagccgctat  | tctttcaaga  | cccattccag  | tatcgatgca | tttttttggc |
| 23101 | aattttgtgta | aattaccttc  | ttcatctttg  | ttaaactcca  | tgaataccag | attccagatt |
| 23161 | tcaacaattc  | tatcgccctc  | ttgtaaatta  | ggactcccat  | ggtcataaaa | aatttcagaa |
| 23221 | catggaccgc  | acggaccagt  | gcttcccata  | ctccaaaagt  | tatcatccgt | tgtaattctt |
| 23281 | atgattttat  | cacttgaaaa  | gccacttatc  | ttacgcctaa  | tctcgtagcg | ctcatcatca |
| 23341 | gtatggtaga  | cgggttatgga | tagtctgttt  | ttatcaagag  | ataactcttt | agtataaat  |
| 23401 | tcccacgcaa  | attctatcgc  | agtttccctt  | aagtaatcac  | cgaagctaaa | atttccgagc |
| 23461 | atttcaaaaa  | atgtgtgatg  | ccgagttgta  | tagccaacat  | tttccagatc | attgtgttta |
| 23521 | ccgcctgctc  | ttaggcactt  | ttgacttgag  | acagcacgtt  | tcatttcagt | tttttgagca |
| 23581 | ccagtaaaaa  | tattttttaa  | ctgcaccata  | ccagcatttg  | tgaacatgag | cgttgagtca |
| 23641 | tgttctggaa  | tcaaaggaga  | agaagaaacc  | tgctcgtggt  | cattatctac | aaaaaatctt |
| 23701 | ataaatcttt  | ctctgatttc  | gtttagcttc  | atcgttttta  | ttgaggttat | ctataaataa |
| 23761 | taagttgtaa  | tggaaataaa  | atcaatacca  | ctctctagat  | ctcagaactt | ctagtacat  |
| 23821 | gcaccttggtg | gtaagaaaaa  | atcaatatat  | tcacgataaa  | tttacctcat | atctgtgttt |
| 23881 | tatatgtgga  | aattggaatg  | gaaatcttatg | taggcaaaga  | aaaaagaata | gcaaagtgtg |
| 23941 | tgactcaaca  | ctggaatgac  | ataaaaggat  | cagacagaga  | ttggccagaa | aggcatgaaa |
| 24001 | tagacactgc  | agaaataatg  | gagtcattggc | agcattgttt  | tatcattgaa | gtcaaagatc |
| 24061 | aaggttatat  | ttgcgaaaat  | gcaggagaaa  | aggctgttga  | attctatggt | tttgagaaca |
| 24121 | agacgcgtat  | tgataataag  | tatgcaattg  | atgcaccatt  | tttgcgacta | tataaaatag |
| 24181 | atgcagtcac  | tgataaaactt | gatactgtaa  | tagagagtaa  | atgtccaatc | aacgaagagg |
| 24241 | aagaaagtga  | aagtgttaaa  | atgaggcaag  | tattgttgcc  | acttggggat | aaagaaggta |
| 24301 | taacacatat  | attgggcgta  | attactttta  | aactccttta  | atatacaatt | ttaatttgat |
| 24361 | tctttaataa  | aattatctat  | actactactt  | aattactatt  | aaagaactca | atagtagtgc |
| 24421 | ttgtaaatct  | gttttagaata | tgaagaaaat  | aaaattaaaa  | accaaactct | ctgtcaaaaa |
| 24481 | gcgctttcac  | cttacagcta  | agggtaaagt  | catttctact  | cagtcaggca | aaaggcatgg |
| 24541 | catggtaaaag | agaagtaaat  | ctaatatctg  | taatcagcgc  | ggtacaacga | ttcttggtaa |
| 24601 | atctgactcg  | cgtatagtta  | agctttatat  | gccttatggt  | atttaataaa | atggaggtaa |
| 24661 | aataaaatgg  | ctcgggtaaa  | acgtggagtc  | actactcacg  | ctcgtcataa | aaaaatattg |
| 24721 | aaactggcaa  | aggggttatag | agggcgcgca  | aaaagttggt  | atagaattgc | attacaaaga |
| 24781 | gttgaaaaag  | cactgcaata  | tgcttataga  | gacagaagaa  | atcgtaaacg | tgattttcgt |
| 24841 | ggtttatgga  | taatacgtat  | taatgcagca  | gtaagagagc  | atgggcttac | ttatggtagg |
| 24901 | tttatgcatg  | gtcttacact  | tgccggcatt  | gatttaaata  | gaaagattct | tgctgagatg |
| 24961 | gccgttaatt  | ataaggatga  | ttttgccaaa  | ttagtagaag  | ctgtaagtgg | taaattagca |
| 25021 | gagaattctt  | aaagcaaaga  | caccatgaga  | attatcttca  | tggggtcacc | agaattcgct |
| 25081 | gttagtagcg  | taaacttact  | attgaaatca  | cagaataaaa  | tagtagcagt | atacaccaag |
| 25141 | gtcccaaaac  | cttcagggcg  | tggacagaag  | ccaacgaaat  | ctccagtaca | tgttatcgct |
| 25201 | gaagaaagta  | acatagaggt  | atgtactcct  | atctctctaa  | agttttcggc | agagcaagaa |
| 25261 | aaatttagaa  | atttcaaacc  | agacgttgca  | gttgtagctg  | cgtatggatt | gatacttcca |
| 25321 | agagaaatct  | tgaatatctc  | aaaatatggt  | tgtattaata  | ttcatccttc | attactacca |
| 25381 | aggtggcggtg | gtgcagcccc  | gatacagcac  | acaatttttag | caggagatca | agaaaccggg |
| 25441 | gttagcatta  | tgcaactgga  | tgaaggatta  | gattccggcc  | ctatctttaa | acaggaaaaa |
| 25501 | tttcttatcg  | aaaagaacga  | taattacaag  | acattgcatg  | ataaattgtc | tgaattaggc |
| 25561 | agtgatttac  | tgctggaagt  | gctaaacgaa  | attgaaaaac  | agcttctctt | aaaacagaac |
| 25621 | gataacgatg  | catgttacgc  | taacaaagtg  | gaagactata  | aaatttatgc | aagtgatgcc |
| 25681 | tgtgaagtgtg | cttatagaaa  | ggttaaagcg  | ttttacccaa  | aagcattcat | taagatagaa |
| 25741 | aataaacgta  | tcaggatact  | tgatgctgac  | tttgaagctc  | tcgcttcaga | acaaggtaag |
| 25801 | attgttaacg  | ataatatgca  | cataagttta  | aaaggtggca  | ctttaattcc | taaagtgtga |
| 25861 | caaatggaag  | ggagaaatcc  | ttgcagtatt  | gaagatttta  | ttcgtggctt | gaaatcaagc |
| 25921 | atggtaaaaa  | aatttataga  | atagactgct  | ttaaattagt  | gtagaaatgt | aatagctaaa |
| 25981 | tttctttttc  | ttagatataa  | tcttataaaa  | ttttctgtac  | aaaaatgaaa | atcaaaagag |
| 26041 | ctttaatatc  | ggtatatgat  | aaaacgaata  | taattgatct  | tgcatcgttt | ttaatgcagc |
| 26101 | aacaaataga  | aattctttca  | acaggaaata  | cttataaagc  | actatctgat | gccggaataa |
| 26161 | aaacgcaaga  | agtatcagat  | tatacgcaat  | ttccagagat  | actgggtggt | agagtaaaaa |
| 26221 | ctttacaccc  | taaaattcat  | ggaggaatac  | tttatgatcg  | agaaaagcac | aaaaaggaag |
| 26281 | tgcaagatct  | agaaattgag  | ccaatagacc  | tgcttataac  | taacctatac | ccattttggg |

|       |             |             |             |             |             |             |
|-------|-------------|-------------|-------------|-------------|-------------|-------------|
| 26341 | agacagtaag  | tagcagctca  | aatgaagagc  | aaattataga  | acaaattgat  | atcggcggag  |
| 26401 | tggcattaat  | tagagctgca  | gcaaaaaact  | ttcgtttttac | ttcagttatt  | tctaggattc  |
| 26461 | aagactatga  | agcactgaaa  | gctgagatga  | tagaaaataa  | caataaaaaca | acattggaat  |
| 26521 | atagaaaaca  | cttagcaacc  | aaagcatttg  | ctctcactgc  | acactacgat  | tctaataatc  |
| 26581 | acagttgggt  | tttatcccag  | agtaaaaaata | atgagttacc  | agagtttttt  | gctctatacg  |
| 26641 | ggcataaagt  | acaagaactc  | aggtatgggtg | aaaatcccca  | tcaaaaagct  | gcatttttata |
| 26701 | gtaatcaatt  | tacagaatat  | ccgttggaaa  | aactacatgg  | aaaagagttg  | agttataata  |
| 26761 | atatagtaga  | tatagaatcc  | gcacttaaca  | taacttctga  | attcgaagaa  | cctgcagcag  |
| 26821 | tgataatcaa  | gcataataac  | ccatgtggcg  | ctgctattgg  | taataatgct  | ttggaggcat  |
| 26881 | atgaaaaagc  | tctatcgtgc  | gatgaagtaa  | gcagtttttg  | tggtatagtt  | gccttaaacc  |
| 26941 | gggagataga  | tttaaagcta  | gcggaaaaaat | taaacgagat  | atTTTTtagaa | gtagtgatag  |
| 27001 | caccatcggg  | aaacaatgag  | gcactaaaaa  | ttttacaaag  | aaagaaaaaat | ttaagagtga  |
| 27061 | ttattcataa  | atcttttcaa  | caaaatgtga  | aataccaaac  | taaaaatggt  | gttgggtgggt |
| 27121 | ttttgggtgca | agaaaaataat | gaccacacaa  | taaaagcaga  | acaagtaaca  | gaatgcactg  |
| 27181 | caacagacaa  | agaaaaaaaa  | gatcttattt  | ttgcctggaa  | aatatgtaag  | catgtgaaat  |
| 27241 | ccaacgcaat  | agttatagca  | aaagatgggt  | gtgctattgg  | catcggcgca  | gggcaaacaa  |
| 27301 | gcagaataga  | tagtgtgaac  | attgcagtga  | aaaaagcagg  | tgaaaaatgt  | aaaggtgcgg  |
| 27361 | tgcttgcttc  | agatgcattt  | ttcccatttc  | cagatagcat  | agtagaaaagc | acaaaacatg  |
| 27421 | gaattacagc  | tataattcag  | cccgggtggct | cgctaaaaga  | tcaagatgtg  | ataaaaagctg |
| 27481 | caaatgaaaa  | taaaattgct  | atgtttttca  | ctggcgttcg  | cagttttttc  | cattaggctt  |
| 27541 | tgtgtcttat  | cgtcataccg  | ccacaaaccg  | tcataccgcc  | gcggtatctc  | tcaacataga  |
| 27601 | tcccgttagc  | gggatgacaa  | atataccgcc  | gcggcgctaa  | caagagatcc  | cgctaacaag  |
| 27661 | cagcgggatg  | acagcagtcc  | tacgtcatcc  | caccgcgaac  | cgtcataccg  | ccgcggtatc  |
| 27721 | tcagccgcta  | acaagagatc  | ccgctaacaa  | gcagcgggat  | gacgagctta  | tcgtgctgcc  |
| 27781 | acgaaccgtc  | atgcctctgc  | gaaccgtcat  | accgcgattc  | attcgcggta  | tctcagccgc  |
| 27841 | taacaagcag  | cgggatgacg  | gctgtcgctt  | agccacaaac  | gttaaaaaat  | ttaccaataa  |
| 27901 | aaaaaaaaagg | caaagaagcc  | ccgtgggtgcg | agtttttgacc | ctctaatact  | ttaaattggc  |
| 27961 | gctgtaataa  | tgtgctaacg  | cttaaaaataa | gcgcgatttg  | gctgaatgta  | gaaaaaatta  |
| 28021 | aaaagacatg  | cagccgctat  | aatttttatgt | aatccgccaa  | tagatactcc  | aagtttttta  |
| 28081 | ctgaattttt  | gttattgaac  | ccgcgcggat  | caaaaacaag  | ttttgagtca  | gaaatactct  |
| 28141 | taatactaca  | ataagggggc  | tggcggagtt  | tgtcaagtaa  | gttttttcgt  | ttctgtgacc  |
| 28201 | agttggactt  | aaagtctaca  | caaaaaacgt  | ttacaaccaa  | cgttcaacat  | ggtaaattaa  |
| 28261 | aaacggttta  | ttcctcggta  | gctcagtggg  | agagcagttg  | gctgttaacc  | aattggtcgc  |
| 28321 | tggttcgaat  | ccggcccggy  | gagcgtttct  | ctgtgaaatt  | ctagtgttga  | ttttatatga  |
| 28381 | acattaaatc  | agtggtttta  | tgtatactag  | atggctgggg  | aaatggaata  | gagaataata  |
| 28441 | aatacaacgc  | tattagcaac  | gcaaatccac  | cttggttgga  | atacattagc  | tctaattatc  |
| 28501 | caaaatgcag  | tttatccgcc  | tgtggaactg  | atggttgggt  | acctgggtgg  | cagataggta  |
| 28561 | actcagaagt  | tggccacatg  | aatattggca  | gtggtagagt  | agtaatgcaa  | agccttcagc  |
| 28621 | gcattaatca  | agagattgga  | acaatagaaa  | acaatgtaaa  | tctacaaaag  | tttattaatg  |
| 28681 | atctaaaaag  | taagaatggg  | atatgccatc  | tagtgggatt  | ggtgtcagat  | ggcgggtgtc  |
| 28741 | attcgcacat  | aaagcatatt  | tcaacttttag | caaataaaaat | atcacagcat  | ggaatcaaag  |
| 28801 | tggtgataga  | tgcatttttta | gatggcagag  | acacattgcc  | aaattcagga  | aaaaaatgca  |
| 28861 | ttcaagaatt  | tataaagagt  | ataaagggaa  | atgacataag  | aattgctact  | gtttctgggc  |
| 28921 | gttactatgc  | tatggaccgt  | gataacaggt  | gggagagaa   | aattgaagct  | tatgaggcta  |
| 28981 | tcgcattttg  | aaaggcacct  | cgtcatgata  | atgcagtatc  | gttgattgat  | gaaaattatc  |
| 29041 | aaaataacat  | aactgatgag  | tttgtcaggc  | ctgcagtaat  | aggtgactat  | caaggtataa  |
| 29101 | aaccagaaga  | tggagtgtgt  | ttggctaact  | ttcgtgctga  | tcgaatgata  | caattagcaa  |
| 29161 | gtatttttgc  | aggcaaaaaca | gactatatgt  | aggtagcaaa  | actctcttca  | attctaagca  |
| 29221 | tgatgaaata  | taaagaagat  | ctcaaaaattc | ctcataattt  | tcctcctact  | tctttcgtctg |
| 29281 | atactctagg  | acaaacaata  | gcagacaata  | aattgcaaca  | attacgtatc  | gccgaaaccg  |
| 29341 | agaaatacgc  | tcattgtgact | ttcttttttca | attgtggaaa  | agaagaacct  | ttctctgggtg |
| 29401 | aagaaagaat  | actcattccc  | tcaccaaag   | ttcaaactta  | cgatttgcag  | cccgaatgt   |
| 29461 | cagccttcga  | gctcacagaa  | aagcttgtag  | aaaaaattca  | ctcccaagaa  | ttcgcactga  |
| 29521 | tagttgtaaa  | ttacgcta    | cctgatattg  | tagggcatac  | aggtaatata  | aaagcagccg  |
| 29581 | agaaagctgt  | gctagctgta  | gatgattgtc  | ttgcgaaaag  | gctgagtgtc  | gttaaaaagt  |
| 29641 | caagcaacac  | cgcattaatt  | gtcactgcag  | accacggtaa  | tgtggaatgt  | atgttcgatg  |
| 29701 | aagaaaataa  | tacacctcac  | acagcacaca  | ctctaaaata  | agtgccattt  | atttgtctt   |
| 29761 | gcgataatct  | aaaactaaga  | gacggaaggt  | tatctgacat  | tgccctact   | atTTTtacagc |
| 29821 | tacttggaat  | taaaaaacca  | aacgaaatga  | caggcagttc  | gttgattttc  | tgcattaccc  |
| 29881 | tctgtcattc  | cagctaggca  | gcgttatgca  | ccggaatgac  | atcaaataga  | tgtgttttaa  |

|       |             |             |             |             |            |             |
|-------|-------------|-------------|-------------|-------------|------------|-------------|
| 29941 | cttaaatccaa | cttttaaatt  | tttcgctgtt  | agtactaatg  | attcattaaa | gaagctgtca  |
| 30001 | atatcaccaa  | tactatctat  | atTTTTtGta  | ctgatagatt  | ggtcaattct | tttgacccaa  |
| 30061 | ttagataaaa  | ctttattagg  | gccaatTTca  | acaaattTgt  | taatgccacg | gcttgacata  |
| 30121 | tacaaaacca  | tttctctcca  | tttactcttg  | cttacaactt  | gcttgggcag | taaagtTTTT  |
| 30181 | ataacttttg  | gatcactctc  | ctcttttagct | gtaacatttg  | atatcaaagg | aactatagga  |
| 30241 | cgggttattt  | taataccctt  | caaaaactcc  | aaaactTTTT  | catcagcagg | tttcataaga  |
| 30301 | gatgaatgaa  | aaggccact   | aacctgtaat  | ttaattagtt  | tcctcacact | cgagtttttg  |
| 30361 | aataaatcgg  | gtaacatttc  | aagagcttct  | ctagtgccac  | ttataaccac | ttgtccgcca  |
| 30421 | ccgttatcgt  | ttgcaatttc  | acaaattccg  | tcaatttgaa  | ctgatttcaa | tatatcttcc  |
| 30481 | acttcattta  | tctctgctcc  | aagcaacgca  | accattccgc  | ctttacattt | cagtgaagct  |
| 30541 | tcatgcattg  | cttcgctgcg  | aactttcagc  | agcttgattg  | cagactcaag | cgtaaagct   |
| 30601 | cctgcagcac  | acagcgctgt  | atattcgcca  | actgaatgcc  | cacaaacata | tttaacattg  |
| 30661 | tgatcagtga  | aaagagattt  | gccaaacaca  | tgctccataa  | cacgtagcat | tgcaattgat  |
| 30721 | actgccatta  | tagctggctg  | agcgTTTTct  | gtaatggtta  | attcttcaat | aggaccgttg  |
| 30781 | aagattaaat  | gagacagctt  | tccatccaat  | atgctatcta  | cttcattaaa | tacttgtctt  |
| 30841 | gcaacagaaa  | actcactata  | taagctcctg  | cccattccta  | caaactgaga | gccctgacca  |
| 30901 | gggaaagcga  | aaatcatgat  | aattattact  | tattccttat  | taagtataac | atTTtattta  |
| 30961 | TTTTTgtca   | atattttaga  | ataatgattg  | acttagtgaa  | ttaagttcac | tagaatgtta  |
| 31021 | actgactaaa  | agtttataaa  | caacaatgaa  | ttatcataaa  | attattatag | ttatgacaga  |
| 31081 | cggtcraag   | tttgaaactc  | gttccactta  | tggaaggagg  | ggagataggg | taaaacttga  |
| 31141 | tagagatcct  | cttactcacc  | ctgcatggac  | tggaagtttg  | acaagcgggt | tagcaagtaa  |
| 31201 | aactagcaaa  | ttagctaagt  | ttaacgataa  | atatggaagc  | atTTtcta   | tctcctcctc  |
| 31261 | tttaagtttt  | agagagtTTa  | ctgaagcatg  | cataaataca  | aaaatatagg | ctatgttgct  |
| 31321 | tctccatcac  | caaaatcgca  | ggaagtatct  | aaactattaa  | agaaacttaa | TTTTatcaat  |
| 31381 | ataacagaag  | aaaataagtc  | cgaaatcgat  | ctattgatag  | ttgttggcgg | tgatggcttt  |
| 31441 | atgctacgca  | ccttgcataa  | ttacgttata  | gaaaataaaa  | acatgcatgt | gtatggggta  |
| 31501 | aataccggca  | atggtgggtt  | tttgatgaat  | aaatgcttta  | gccgcagtga | agatttaatt  |
| 31561 | gatcatatag  | aacatgcaac  | ttcaactcag  | ttaactttgc  | taaaaatgga | agcaacagac  |
| 31621 | acaagtggca  | agaggatatca | ctacatagcg  | gtaaacgagg  | tatatgtttt | tagaaaagca  |
| 31681 | aaccaaatag  | tagaaatgaa  | tactactatt  | aatgataagc  | taaaagtaga | aaaatttaga  |
| 31741 | ggggacggag  | taatattatc  | tactcccaca  | ggtagcactg  | catataaact | ctctgccggt  |
| 31801 | ggcccaatct  | tgccgctaaa  | ttcaaattta  | cttgcattaa  | cctctatcaa | tagctattac  |
| 31861 | ccaaggcatt  | ggaatggagc  | gttaatatca  | aacgatacaa  | tcgtacaaat | tgacattaac  |
| 31921 | gacacaaaaa  | accgtccagc  | acttgtagta  | tcagattaca  | aagaatttca | tgatatatca  |
| 31981 | cagataaaaa  | tacaaaaaga  | ccatgagaac  | acaatcactt  | tgctTTTTga | caaagattac  |
| 32041 | cctctgaatg  | aaagaatctt  | tgatagacaa  | tttctatact  | aataatgtat | ctgttcagat  |
| 32101 | acatggctaa  | tgtacaaata  | ttgaaacaaa  | aattccagtg  | cccctgtgat | gtcattccag  |
| 32161 | tgcttgacac  | tggaatccag  | cttttgatca  | aaaatgttgt  | atagtacaca | atcaaatTTt  |
| 32221 | ctggatccca  | gtgtctgggc  | actgggatga  | caccttTTtg  | ttcctatagt | tgtcttttct  |
| 32281 | cgtctacctt  | atTTtgccac  | tctgctaaac  | agatacatta  | tctgtaaatt | ggtatttact  |
| 32341 | acatctta    | aactatagcg  | taatcaatgc  | agcatagtaa  | ttactTTtg  | agtgaatatg  |
| 32401 | catgggtcag  | tcgaaaaatc  | aacagtaaaa  | ttacttctt   | acgaacaaac | aggtgacaat  |
| 32461 | agcaagataa  | cactaaaaga  | tccaccatcg  | cctgaagaag  | caggaaatgc | tatctcaagt  |
| 32521 | gtactgaatg  | tagtaccacg  | tgtgcaggga  | atgtcacatg  | aagaatcaga | tgatgaggaa  |
| 32581 | gtggatccta  | cttatgcata  | tgtaaatcga  | caaaaagatg  | gtgatggagc | accaccgatt  |
| 32641 | ttgccaaaag  | ctccagggtt  | acaagacaaa  | gaagacaaaa  | atTTgtttgg | tcttagtact  |
| 32701 | gaagtactac  | ctccttccct  | agaagaaaca  | aaaggtgaga  | ctcatgattg | ggtatcacaa  |
| 32761 | acagcaagtt  | taggttttag  | aggattatct  | ggtaatggat  | cagaagaaca | tatttatgca  |
| 32821 | gctatagacc  | caa         | atccttcgaa  | aagagtttag  | acagtggaat | aggtggtcaa  |
| 32881 | aactcaaaag  | atgatttagg  | tgcgtcttca  | aatactttac  | catcgtataa | aagcaaagat  |
| 32941 | gactctgaag  | agtctttgtc  | actaaattct  | gatataaggt  | gcacaacaaa | taaaaaaaca  |
| 33001 | aacagattct  | tgccaagagc  | aaagtatgcc  | atgcagcaga  | agggTTTTat | aatTTttgggt |
| 33061 | gcaagtgcta  | ttataactcag | tatatctgca  | gctttattat  | atTTacaaga | taaagcaaaa  |
| 33121 | tttattgcat  | TTTTtacaaa  | cagcccaaaa  | tatatcactg  | taccagttat | cgcaacttgct |
| 33181 | gcattgcttg  | caattgggtc  | aatatTTTTt  | gcaacaaggc  | aatTTataga | tactgaagaa  |
| 33241 | cattccattc  | aaaaaaaaaga | tgcgataaaa  | atTTtagctg  | aggtgttgga | gcaccagcca  |
| 33301 | aaagataaag  | ctataaaatc  | tgtaagactg  | gaataatagca | atggcactca | ttcaaatTTt  |
| 33361 | gtacttaatg  | cttggaagc   | taaacaaggc  | ttcactaaca  | ttgacgaaaa | agtaattact  |
| 33421 | agaactaata  | aaataaaatc  | agtaattaac  | gacagaccaa  | tatttactgc | attatttact  |
| 33481 | ggtgtagttg  | ctgcaaatat  | agcgtttcct  | ctagggctac  | ttgcaacaca | tggtgttaat  |

```

33541 ggtgtacaaa aattttacca aaaccctttg actaataaca taggattatc attacttata
33601 gggtcttgga tacttgcatc actcattgtg gggtttggca tacattatta tagaaaaaca
33661 aattgcacta atcttatata ttgcgaggaa aagattgacc ctgaaagcgt taacaagaaa
33721 ttcatagaag aaataaaaca cgaaagaaca aatgttcttg gggaaaacca cggtaaagac
33781 gctaaacgca gcagcttaac gcttgagcaa gttgtggttc aatctcataa ttgtaaggat
33841 gttgtttata gtgtcggtta ataaaatgca tgatatagct agtgcagccc tacgtcatac
33901 cgccgcagac cgtcataccg cgattcattc gcggtatctc tagatcccg taacacgtag
33961 cgggatgacg attgtcaggg tagcacctcc ctcccctgtc atccaagtag ctgac

//
LOCUS      JAQZAU010000052                6041 bp    dna        linear    ENV 17-MAR-2023
DEFINITION MAG: Wolbachia pipientis isolate wEsol contig_33766, whole genome
            shotgun sequence.
ACCESSION  JAQZAU010000052  JAQZAU010000000
VERSION    JAQZAU010000052.1
DBLINK     BioProject: PRJNA929258
            BioSample: SAMN33142973
KEYWORDS   WGS; ENV; Metagenome Assembled Genome; MAG.
SOURCE     Wolbachia pipientis (insect metagenome)
ORGANISM   Wolbachia pipientis
            Bacteria; Pseudomonadota; Alphaproteobacteria; Rickettsiales;
            Anaplasmataceae; Wolbachieae; Wolbachia.
REFERENCE  1  (bases 1 to 6041)
AUTHORS    Fiutek,N., Couger,B.M., Roy,S., de la Torre,J.R. and Connor,E.F.
TITLE      Genomic assessment of the contribution of the Wolbachia
            endosymbiont of Eurosta solidaginis to gall-induction
JOURNAL     International Journal Molecular Sciences
REFERENCE  2  (bases 1 to 6041)
AUTHORS    Fiutek,N., Couger,B.M., Roy,S., de la Torre,J.R. and Connor,E.F.
TITLE      Direct Submission
JOURNAL     Submitted (10-FEB-2023) Biology, San Francisco State University,
            1600 Holloway Ave, San Francisco, CA 94132, USA
COMMENT     ##Genome-Assembly-Data-START##
            Assembly Date      :: JUN-2019
            Assembly Method    :: FLYE v. 06-2019
            Genome Representation :: Full
            Expected Final Version :: Yes
            Genome Coverage     :: 100.0x
            Sequencing Technology :: Illumina HiSeq; PacBio Sequel
            ##Genome-Assembly-Data-END##
FEATURES             Location/Qualifiers
     source            1..6041
                        /organism="Wolbachia pipientis"
                        /mol_type="genomic DNA"
                        /submitter_seqid="contig_33766"
                        /isolate="wEsol"
                        /isolation_source="galls on Solidago altissima"
                        /host="Eurosta solidaginis MN-2018-EFC"
                        /db_xref="taxon:955"
                        /environmental_sample
                        /country="USA: Cowling Arboretum, Carleton College,
                        Northfield, MN"
                        /lat_lon="44.48 N 93.13 W"
                        /altitude="280 m"
                        /collection_date="2018-11"
                        /metagenome_source="insect metagenome"
                        /note="metagenomic"
     gene              287..2293
                        /locus_tag="wEsol_00510"
     CDS                287..2293
                        /locus_tag="wEsol_00510"

```

```

/codon_start=1
/transl_table=11
/product="hypothetical protein"
/pfam="Pfam-B_1913 SWIM Pfam-B_8147 DUF3670"
/translation="MTIYGRTWWGEKWLQCFNRIDYDNRLPRGRTCANTGRTFGIKIN
GHIVTAKVHSSGSYPYRGSKPQPYKVKIILNELSSSEQQTIRQIIETSPSILSKLINR
QLPTSLFDKLNLDLGIKLFPSNWEEMNANCNCPDWAMPCKHIAAVIYLIAAEIDKNPFM
IFNIHNCNLSALIDDFGNGKLENAQNILKIDDIKACSKIRIHNQAILNDIDLSTIPN
LFDCISSILTNDNPLFFEKNFHNILQIAYKHWQKYPAGKLVYYPASKKELSEEELFIKR
WGNIEWQTFQLFIDDQHYLTQVSNGTNTNVFMLSRLNVLKDIARFLNDIPNSLLHRLNR
ELRFMHMISQFAHMLMEKSALIPQVLQNKRGEEIIIRWIPALFNESVKEIHSKISSICP
PLLIKYQEIAMPEEQVNVAISLILLGYIEDNFPASLDKHRDKYIFELFFTGRPYKFT
EFSNKEIPQAINLWLSRLYLADKPYKLYLMIKDHHEKFELEVQSLDDEKSFikleKA
LSNQNVKLSILSDLALLSEYIPELERSIDSNKLSFNLDGFAPLFLGIVPVLRAIGIT
VILPKSLQKIFKPQLSLSLSAKDKIKEDRESFLTLENLLKFDWKVAIGDKKLSVTEFK
KLLKDSRGFVRIVDQYVLLDDKEVEALLKKLDKLPDYLSQAELM"
/besthit="qcoverage 100 , hcoverage 56.8510638297872 ,
similarity 99.6 , identity 98.7 , eval 0.0 , alnlength
668 , Bacteria , Proteobacteria , WP_015588903.1
MULTISPECIES: DEAD/DEAH box helicase [unclassified
Wolbachia]"
gene 2354..3814
/locus_tag="wEsol_00511"
CDS 2354..3814
/locus_tag="wEsol_00511"
/codon_start=1
/transl_table=11
/product="hypothetical protein"
/pfam="ResIII SNF2_N DEAD Helicase_C"
/translation="MFKKFNTYTPVTTNNLIAQLRPYQERGFSWLVQNIESGFGSII
ADDMGLGKTIQVIAAILYCKNAGFLNEDKVLIVAPTSILSNWQREIERFAPELKLFIY
HGQNRELASDYDVALTSYGLARRDKKELNKIRWFLLLIDEAQNIKNPTEQTAKAIKAI
EATHRIAMSGTPVENRRLLEYWSIFDFINKSYLGTGPKQFKTYFATPIEKARDRTCLERF
MKITSPFMLRRLKSDKSIIQDLDPDKIENNRYCSLTSEQTALYQKVVDTTMEKIEKSEG
IERKGLIFKLINALKQICNHPNQFGKKKRASIEQSGKMQLLEEILISIGEVAEKSLIF
TQYTEMGEIIARLLEERFESKVPFLHGGLSRKARDTMINDFKNLFQSNILIVSLKAGG
TGLNLTAANHVIHYDLWWNPAAVEAQATDRAYRIGQERNVMVYRLLSTGTTFEERIDEMI
QSKKELANLTISSGESWITEFNNDQLRDLVNIKNAL"
/cog="HepA COG0553 866 Superfamily II DNA/RNA helicases,
SNF2 family"
/besthit="qcoverage 100 , hcoverage 41.3617021276596 ,
similarity 99.2 , identity 97.7 , eval 0.0 , alnlength
486 , Bacteria , Proteobacteria , WP_015588903.1
MULTISPECIES: DEAD/DEAH box helicase [unclassified
Wolbachia]"
gene 4592..>6041
/locus_tag="wEsol_00512"
CDS 4592..>6041
/locus_tag="wEsol_00512"
/codon_start=1
/transl_table=11
/product="hypothetical protein"
/pfam="Toprim_4 Toprim_3 Toprim_2 AAA_25"
/translation="MVQDFLTDVQKNTLNDEYYDFNNTVEPLEQFDVEEIKRQLLLN
IRSCLSYLFPRGTFRGDKFYIGNVQGDGKSLVVELSGSEAGLWHDFAKEGGDIIDL
WAAVHRKSTRIEFPEVMASIAEWFHGFKKLKTSGNPTAYWDYDENGQAIVRVYRIDD
DSGKRYLPFDVKKSTFTAPEIRPLYNIPGILKSDKVILVEGEKCAEALIKQGITATTT
MSGANADVKKTDWSQLKGKHIIIPDNDEAGAKYAKNVGNKLLIEIGVASLAVLEIPRG
KPEKWDAADCVEEGIDVKEFLASTPLLTIDTPATDTSNMKSLERSTKQPLNILDWSAE
RFVGPVPEQKFLVEGLFPLGVTSIIAAMGDTGKGMMLLDLALKVASDMDQLCGFGPLV

```

TEHGSVVIFSAEDDASEIHRRLERLDPK CERLKHKDKLFIVPLPNVRGSLTILNRVRG  
 KIVEVSPEFESVMKQLEEI KDLKLIVFDPLASF"  
 /besthit="qcoverage 100 , hcoverage 66.4374140302613 ,  
 similarity 100 , identity 100 , evaluate 0.0 , alnlength  
 483 , Bacteria , Proteobacteria , WP\_174516735.1 AAA  
 family ATPase [Wolbachia endosymbiont of Cardiocondyla  
 obscurior]"

# ORIGIN

```

1  aaaaactact caataattgg gtaacttctg atgacatttt cactgtacat ttatcgcac
61 acattagtgc tacaatcaca ggtgtaaagg tattaaacaa cttttaaaaa gtttcacttt
121 tcccttaatc aatttttcct ttgatataag tgtttattgc ttttgccttc tctgttgta
181 taattaacat tttgtagtag ttcaagatga gttttgcata ttcagagaaa atcatccata
241 gaatcagcat ctagcttatc taggttaaaa tatatagttt tacaagatga ctatttatgg
301 aagaacatgg tggggagaaa aatggcttca gtgcttcaat agaattgatt atgataaccg
361 tcttccacgt ggcagaactt gtgctaatac tggtcgaact tttggtatta aaattaatgg
421 tcacatagtt acagctaaag ttcatagctc aggatcttac ccatatcgtg gttcaaaacc
481 tcaaccatat aaagtcaaaa ttatactcaa tgaattaagc tcatcagaac aacagaccat
541 tcgtcaaatt attgaaactt caccttctat actatctaaa ttaataaata ggcaattacc
601 aaccagcttg tttgataagc ttaatgatct tgggattaaa ttgtttcctt caaattggga
661 agagatgaat gcaaattgca actgtcctga ttgggctatg ctttgtaaac acattgctgc
721 tgtaatttat cttattgctg cagaaattga taaaaacccc ttcattgattt ttaatatcca
781 taattgtaat ttgtcagcac ttatcgatga ttttggaat ggaaaattag aaaatgctca
841 aaatatttta aagatagatg atatatttaa ggcattgttct aaaattagaa tacataacca
901 agcaatttta aatgatattg atttatcaac tattcctaac ctttttgatt gtatcagtag
961 tattttaaca gataatccac ttttttttga aaaaaacttc cataatattt tacagatagc
1021 ttataagcac tggcaaaagt atcctgcagg aaagttagtg tactatccag cttctaagaa
1081 ggaactatca gaagaggagc tatttattaa aagatgggga aatattgaga attggcaaac
1141 atttcaacta ttcattgatg atcagcatta cttactcaa gtgagcaatg gtacaactaa
1201 tgtattttatg ctaagtagaa atgtattgaa agatatagcg cgatttttaa acgacattcc
1261 taattcgtta cttcacaggc ttaatcgtga acttcgcttc atgcatatga tttcacagtt
1321 tgcacatatg ctgatggaaa agtcagcgct aataccacaa gtattacaaa acaaaagagg
1381 agaaattata attaggtgga ttccggcggt gtttaatgag tcagttaagg aaattcatag
1441 caagatatca tctatttgtc cgcctctatt gattaaatat caagaaatcg ctatggaacc
1501 agaggaacag gtaaatgttg ctatctctct catcctttta gggatatatag aagataaactt
1561 tcctgcatca ctggataagc atagagataa atacatcttt gaattattct ttactggaag
1621 accatacaag tttactgagt ttagcaacaa ggaaataaccg caagcaatta atctctggct
1681 ttcacgtctt tatttagcag ataaacctta caaactctat ttaatgataa aagatcacca
1741 tgaaaaattht gaacttgagg tacagttatc actggatgat gagaagtcac tcataaagct
1801 ggaaaaagca ctttctaatac aaaacgtaaa gcttagtatt ttatctgatac ttgcactctt
1861 atctgaatac atacctgaat tagaaagatc gattgatagc aatagcaagt tatcatttaa
1921 tttagacgat tttgcacctt tattcctggg tattgtacca gtactaagag caataggtat
1981 aacagttatc ttgccgaaat ctttgcaaaa aatcttcaaa ccacaattaa gtcttagttt
2041 gtctgccaaag gataaaataa aagaagatcg cgaaagttht ttaacgctgg aaaaatttatt
2101 gaaatttgat tggaaagtag caataggaga taaaaaacta agcgttacag aatttaaaaa
2161 attgctaaaa gattcccag ggtttgtaag aatcgtggat caatacgtcc ttttggtatga
2221 caaagaggta gaagctttat taaaaaaact tgataaattg cctgattatt taagtcaagc
2281 agagcttatg taagctgctc taacaggaga agtaaatgaa actaaagtag catttgacca
2341 gcagcttaca agcttgttta aaaaatttaa tacttacaca cctgtaacta cgccaaataa
2401 tctaatagca caactacgcc catatcaaga acgcggattt agttggcttg tacagaacat
2461 agaaagtggg tttggtagca taattgctga tgatatgggt cttggtaaga ctatacaagt
2521 tattgcagcc attctatact gtaaaaatgc aggatttht aatgaagata aagtcttgat
2581 agtagcgctt acaagtatct taagcaattg gcaaaaggag atagagcggt ttgcaccaga
2641 attaaagctt ttcattctatc acggacaaaa tgcagaattg gcaagtgatt atgatgtagc
2701 tctaacaatcc tatggctcttg cacgtcgtga taaaaaagaa ctttaataaaa ttcgctgggt
2761 tttgctcttg attgatgaag cacaaaatat aaaaaatcct aataccgaac aaaccaaggc
2821 aattaaagct attgaggcaa cgcatagaat agcaatgagc ggtactcctg ttgagaatag
2881 gttacttgag tattggagca tttttgattt tatcaataaa tcttatcttg gtacccttaa
2941 gcagtttaag acctattttg caacaccaat tgaaaaagca agagatagaa cttgtctaga
3001 aaggthttatg aaaatcacta gccctthttat gttacgtagg ctttaagagt ataaaagcat
3061 tattcaggat ttaccagata aaattgagaa taatcgttat tgttccttca cttcagaaca

```

```

3121 aacagctctt tatcaaaagg ttgttgatac aactatggag aagatagaaa agagtgaagg
3181 aattgaacgt aagggaacta tctttaaact tatcaatgct ttaaagcaaa tttgtaacca
3241 tccatcacag tttggcaaga aaaagcgtgc gagtattgaa caatccggta aaatgcagat
3301 gcttgaggaa atattgatta gtattggtga agttgcagaa aaatcattga tatttactca
3361 atacactgaa atgggtgaga ttatagctag gctacttgaa gaaagggttg aatcaaaagt
3421 gccattttta catggaggac tttctagaaa agcacgtgat acaatgatta atgactttaa
3481 aaacttattc cagtccaaca ttcttatagt gtctttaaaa gctgggtggaa cagggtctaa
3541 tttaacagcg gcaaaccatg taatacatta cgatttatgg tggaatccag cagtggaagc
3601 acaagcaaca gatcgggcct atcgtatcgg gcaagaacgt aatgttatgg tgtacaggct
3661 actttcaaca ggtacatttg aagagcgtat tgatgagatg attcaaagca agaaggaatt
3721 agcaaaccta actataagta gtggcgagag ttggattaca gaatttaaca acgatcaatt
3781 aagagattta gttaataata aaaatgcact ataatatagc tgagttattt aatgtaaaga
3841 accagataac taccgctcaa tagttcaaaa tagagacaaa gatcaaaatt tacgtctcca
3901 atttcatcat gtatagcgga gacaaaattt tgtgttttat gtctcattgg taggcaaaaa
3961 acctgtaatt acgtttttaa gcgattttac cactctagat ccattgtacc tttttagcgc
4021 ctgtaatgcc ctttaaaatt tgaataaaaag gcatctttaa taattctatt catgaaccaa
4081 aaagtaattg ccgttttcag aaacttttca tttttacaga tggcttgaaa agattatcat
4141 taataggtag gccaaactcc tccaaagaaa aaagttttta attttttcag aaaaagtcac
4201 aagaaacccg gtatatatat agtagagggt tttctattcg cttataattc caccttaaatt
4261 taaactatgc ctgcgtatat gagaagggtt agccaaaatt cttacatat tagtagtatg
4321 caatatatca acaaaataaaa aactaagagg ttgacatagt gagtaaaatg tagtagagtt
4381 atagtagagc attttttctt aaaagaaaga agatactaaa gcctcacttt tcactataaa
4441 cctaaactga cttcctttat ttcttaatat agccttgcca agagaacctc ctattgcagt
4501 ttttacttca taagaagaga gtaagacccc aatcaaaaca gccttactca aaaacctttc
4561 aaacgcttaa tcttaaaagg agtttcaatt tatggtacaa gattttttta ctgatgtcaa
4621 acaaaaaaat actttaaatg atgaatatta tgattttaac aatactgtag aaccattaga
4681 gcaatttgat gtagaagaaa taaaaagaca actattatta aacataagat catgcctttc
4741 ttattttatt ccaaggggaa cttttcgtgg tgataagttt tatataggca atgtacaagg
4801 tgataaagga aagagtctag tagtagaatt aagtggcagt gaagctggcc tatggcacga
4861 ttttgcaaca aaagaagggt gtgatatcat cgatctttgg gcagcagtac atagaaaaag
4921 tacgagaata gagtttcctg aagtaatggc ttctatagct gagtgggttg gtcattttaa
4981 aaagctcaaa acttcaggta atccaactgc atattgggat tattatgatg aaaacggaca
5041 agctattggt agagtctatc gttatgatga tgatagtgga aagcgatatc ttccttttga
5101 tgtgaaaaaa tctactttta ctgcaccaga aatcagacct ttgtacaata ttccaggcat
5161 tttaaaatct gacaaagtta ttctagttga aggggaaaaa tgtgcagaag cactgataaa
5221 acaaggtatt acagctacaa caacaatgtc tggagcaaac gcagatgtta aaaagactga
5281 ttggtcacaa ctgaagggca agcatattat tatttggcca gataatgatg aagcagggtgc
5341 aaaatatgct aaaaatgttg gaaataagct tttagaaatt ggagttgcat cacttgctgt
5401 gcttgaaatt cctcgaggta agcctgagaa atgggatgct gctgattgtg tagaggaagg
5461 tatagatgtc aaagagtttt tagcttcaac tccgttactt actattgata ctccagctac
5521 tgatacttca aatatgaaaa gtttagaaaag atccacaaaa cagccactta acattttaga
5581 ttggagtgca gagcgctttg taggtccggt accagagcaa aagtttcttg ttgaaggctc
5641 atttccttta ggtgttactt caataatagc agcaatggga gatacaggca aaggtatgct
5701 tcttcttgac ctggcactta aggttgcaag tgatatggat caactgtgcg gttttggtcc
5761 tttggttact gaacatggat cagtagtgat tttttcagca gaagatgatg caagtgagat
5821 acaccgccgc ttagaacgac ttgaccctaa gtgtgaaagg ttgaaacata aagataaatt
5881 atttattgta ccactgccaa acgttagagg atcacttaca atactcagaa atgttcgtgg
5941 taaaatcgtc gaagtttctc ctgaattcga atccgtaatg aaacagctcg aggaaattaa
6001 agatctgaaa ttgatagtat ttgatccact tgcttcattt a

```

//

```

LOCUS      JAQZAU010000053                6975 bp    dna        linear    ENV 17-MAR-2023
DEFINITION MAG: Wolbachia pipientis isolate wEsol contig_34043, whole genome
            shotgun sequence.
ACCESSION  JAQZAU010000053  JAQZAU010000000
VERSION    JAQZAU010000053.1
DBLINK     BioProject: PRJNA929258
            BioSample: SAMN33142973
KEYWORDS   WGS; ENV; Metagenome Assembled Genome; MAG.
SOURCE     Wolbachia pipientis (insect metagenome)
ORGANISM   Wolbachia pipientis

```

Bacteria; Pseudomonadota; Alphaproteobacteria; Rickettsiales; Anaplasmataceae; Wolbachieae; Wolbachia.

REFERENCE 1 (bases 1 to 6975)

AUTHORS Fiutek,N., Couger,B.M., Roy,S., de la Torre,J.R. and Connor,E.F.

TITLE Genomic assessment of the contribution of the Wolbachia endosymbiont of Eurosta solidaginis to gall-induction

JOURNAL International Journal Molecular Sciences

REFERENCE 2 (bases 1 to 6975)

AUTHORS Fiutek,N., Couger,B.M., Roy,S., de la Torre,J.R. and Connor,E.F.

TITLE Direct Submission

JOURNAL Submitted (10-FEB-2023) Biology, San Francisco State University, 1600 Holloway Ave, San Francisco, CA 94132, USA

COMMENT ##Genome-Assembly-Data-START##

Assembly Date :: JUN-2019

Assembly Method :: FLYE v. 06-2019

Genome Representation :: Full

Expected Final Version :: Yes

Genome Coverage :: 100.0x

Sequencing Technology :: Illumina HiSeq; PacBio Sequel

##Genome-Assembly-Data-END##

FEATURES

source 1..6975

/organism="Wolbachia pipientis"

/mol\_type="genomic DNA"

/submitter\_seqid="contig\_34043"

/isolate="wEsol"

/isolation\_source="galls on Solidago altissima"

/host="Eurosta solidaginis MN-2018-EFC"

/db\_xref="taxon:955"

/environmental\_sample

/country="USA: Cowling Arboretum, Carleton College, Northfield, MN"

/lat\_lon="44.48 N 93.13 W"

/altitude="280 m"

/collection\_date="2018-11"

/metagenome\_source="insect metagenome"

/note="metagenomic"

gene complement(<1..460)

/locus\_tag="wEsol\_00513"

CDS complement(<1..460)

/locus\_tag="wEsol\_00513"

/codon\_start=1

/transl\_table=11

/product="hypothetical protein"

/pfam="Aa\_trans\_AA\_permease\_2 Trp\_Tyr\_perm AA\_permease"

/tigr="TIGR00905 2A0302 473 transporter, basic amino acid/polyamine antiporter (APA) family"

/translation="MSNKIGFWAIFALVISSQIGSGIFMLPISLAPYGMYSLISWIIS GLGAISLALVFASLCAKFPETGGPHVYVKHAFGPAAAFFVGWTYWVISWVSTTAVIVV GVGYLTPFFHEDIQNVHLFLEMLLLTIITLINFRGVATAGRVEFLLTVIKI"

/cog="PotE COG0531 466 Amino acid transporters"

/besthit="qcoverage 100 , hcoverage 36.0849056603774 , similarity 100 , identity 100 , evaluate 1.23e-96 , alnlength 153 , Bacteria , Proteobacteria , WP\_022626385.1 amino acid permease [Wolbachia endosymbiont of Drosophila melanogaster]"

gene 596..2041

/locus\_tag="wEsol\_00514"

CDS 596..2041

/locus\_tag="wEsol\_00514"

```

/codon_start=1
/transl_table=11
/fullproduct="qcoverage 100 , hcoverage 100 , similarity
100 , identity 100 , evaluate 0.0 , alnlength 481 ,
Bacteria , Proteobacteria , WP_197907256.1 hypothetical
protein [Wolbachia endosymbiont of Kradibia gibbosae]"
/translation="MNPRLKAFLVVCSIIAFLIALLLFLVYYLNLVNYILDPILVRPF
ERLYKNLIVDGLYAYLSTSTSSPALAFLATGFIVIAAFICLNKMLLPLQEKIINNYTS
FKNNNIDSNSMLFEVYKDPTIKLKDKILFFSIHLYYLQLPFLYIASKVSALRGFLIF
NFGLLLLNYALLIPVALLELIKYPVRLFSPLGLNVKQLSFLFNVSDVGTGSQSVHTS
SFEHSILQCAQELKQKFGAQPNVLNKEFEDYINNSDELTTQKEQLKLYLNFNGSNEA
AWQESKTGLTTLTQAANLVSTAANKQKSDVNSLLLMNLKDGLGLCTLGMFDRIIYSLSC
LEAKNNFLVQINGAVNVLTTPKFTERFLKEYCNYKKLKILVDKFEDFYSEDYADKNNIS
DEVKSNINQSIIEIREFVFKELYIKFYEEYGKSIQRGAIKQKLRELVTDDSIKEAVY
SMYNIEIPAEPPTYLERVKAFFGGHARSSAA"
/product="hypothetical protein"
/besthit="qcoverage 100 , hcoverage 100 , similarity 100
, identity 100 , evaluate 0.0 , alnlength 481 , Bacteria ,
Proteobacteria , WP_197907256.1 hypothetical protein
[Wolbachia endosymbiont of Kradibia gibbosae]"
gene 2176..3174
/locus_tag="wEsol_00515"
CDS 2176..3174
/locus_tag="wEsol_00515"
/codon_start=1
/transl_table=11
/fullproduct="qcoverage 99.3975903614458 , hcoverage
80.4878048780488 , similarity 98.8 , identity 98.5 ,
evaluate 2.47e-223 , alnlength 330 , Bacteria ,
Proteobacteria , ERN55350.1 aspartate kinase [Wolbachia
pipientis wMelPop]"
/cog="LysC COG0527 447 Aspartokinases"
/pfam="AA_kinase"
/product="aspartate kinase"
/translation="MACKLLSLQKLYFSSEESIYVTMDKIIKKFGGTSLTDLNRVAN
LIKNDIEKGCNVIVVVS AVAGFTDQMV FQARQISNLSYRQELSEYDVMLSAGEQISCG
LLAITLQSIGVNAKSWLAWQLPIATDDFYSESKIKTIKIERVKRSFAEGYTAIIAGF
QGINDDRITTFGRGGS DISAVAF AVAFGVRTCEIFTDIDGIYTADPRIVPKARKLKF
SYDEMLEMSSSGAKILHNRSVQLAMKHNIKVQVLSTFKEVEGTTVLHKRVDLERYLIT
GITYSTNEALVTFTNLANNLRTRLRDIAGANVKIDMIHGSSFVISKFDIDFNGKVTE"
/besthit="qcoverage 99.3975903614458 , hcoverage
80.4878048780488 , similarity 98.8 , identity 98.5 ,
evaluate 2.47e-223 , alnlength 330 , Bacteria ,
Proteobacteria , ERN55350.1 aspartate kinase [Wolbachia
pipientis wMelPop]"
gene 3113..3409
/locus_tag="wEsol_00516"
CDS 3113..3409
/locus_tag="wEsol_00516"
/codon_start=1
/transl_table=11
/product="hypothetical protein"
/pfam="ACT_7"
/tigr="TIGR00656 asp_kin_monofn 407 aspartate kinase,
monofunctional class"
/translation="MGQVLLSPNLILISMEKLLNKNENYAINDNVAKISIIIGIVMSN
TEVMHRTLKVLSEKKIEILAITTSEIKISIIVQKECAVALVKDLHTEYELDMQH"
/cog="LysC COG0527 447 Aspartokinases"
/besthit="qcoverage 85.7142857142857 , hcoverage 50 ,
similarity 100 , identity 100 , evaluate 1.40e-46 ,

```

```

alnlength 84 , Bacteria , Proteobacteria , WP_006279315.1
ACT domain-containing protein, partial [Wolbachia
endosymbiont of Muscidifurax uniraptor]"
gene 3501..3704
/locus_tag="wEsol_00517"
CDS 3501..3704
/locus_tag="wEsol_00517"
/codon_start=1
/transl_table=11
/fullproduct="qcoverage 100 , hcoverage 100 , similarity
100 , identity 100 , evalue 8.38e-47 , alnlength 67 ,
Bacteria , Proteobacteria , WP_155969026.1 MULTISPECIES:
transposase [Wolbachia]"
/cog="COG3293 COG3293 124 Transposase and inactivated
derivatives"
/pfam="DUF4096"
/product="transposase"
/translation="MYPDISDKKWEILEPHVAQGKIGRPRKHNIRTIINAIKYIMRG
GCQWRMLPKDFPPWKTVDYDFLR"
/besthit="qcoverage 100 , hcoverage 100 , similarity 100
, identity 100 , evalue 8.38e-47 , alnlength 67 ,
Bacteria , Proteobacteria , WP_155969026.1 MULTISPECIES:
transposase [Wolbachia]"
gene 3738..3872
/locus_tag="wEsol_00518"
CDS 3738..3872
/locus_tag="wEsol_00518"
/codon_start=1
/transl_table=11
/fullproduct="qcoverage 93.1818181818182 , hcoverage
97.6190476190476 , similarity 100 , identity 100 , evalue
2.12e-19 , alnlength 41 , Bacteria , Proteobacteria ,
ONI56075.1 hypothetical protein N500_0846 [Wolbachia
pipientis wUni]"
/translation="MLVKEVRKMFVGKNETPSVGIIDSQSVKTTQKGPEDMMLKKNKG
"
/product="hypothetical protein"
/besthit="qcoverage 93.1818181818182 , hcoverage
97.6190476190476 , similarity 100 , identity 100 , evalue
2.12e-19 , alnlength 41 , Bacteria , Proteobacteria ,
ONI56075.1 hypothetical protein N500_0846 [Wolbachia
pipientis wUni]"
gene 4281..4493
/locus_tag="wEsol_00519"
CDS 4281..4493
/locus_tag="wEsol_00519"
/codon_start=1
/transl_table=11
/pfam="RVT_1"
/fullproduct="qcoverage 100 , hcoverage 100 , similarity
100 , identity 100 , evalue 2.45e-45 , alnlength 70 ,
Bacteria , Proteobacteria , ONI57615.1 RNA-directed DNA
polymerase domain protein [Wolbachia pipientis wVita]"
/translation="MHAFDIWMKQNHPTVPFERYVDDAIVHCRTKRQAEFMRAAIEE
RLAQCKLKLQPDNTAIPKLHHTALV"
/product="RNA-directed DNA polymerase domain
protein"
/besthit="qcoverage 100 , hcoverage 100 , similarity 100
, identity 100 , evalue 2.45e-45 , alnlength 70 ,
Bacteria , Proteobacteria , ONI57615.1 RNA-directed DNA

```

```

gene      polymerase domain protein [Wolbachia pipientis wVitA]"
          complement(4648..5100)
          /locus_tag="wEsol_00520"
CDS       complement(4648..5100)
          /locus_tag="wEsol_00520"
          /codon_start=1
          /transl_table=11
          /fullproduct="qcoverage 100 , hcoverage 100 , similarity
99.3 , identity 98.0 , evalue 6.49e-101 , alnlength 150 ,
Eukaryota , Arthropoda , GFR20813.1 DNA helicase II
[Trichonephila clavata]"
          /cog="UvrD COG0210 655 Superfamily I DNA and RNA
helicases"
          /pfam="UvrD_C UvrD_C_2"
          /tigr="TIGR01073 pcrA 725 ATP-dependent DNA helicase
PcrA"
          /product="DNA helicase II"
          /translation="MLENEEVTGLARIENVKELISSLNKFDNATTFLEHISLVMEVDN
MNND DTVYVMTLHAAKGLEFPVFLPGWEEGLFPHQRSFDDKSGKALEEEERRLAYVGI
TRAKERLIISCADRREINNQQWQPMRTSRFIKELPRENVEVIKSNIAYC"
          /besthit="qcoverage 100 , hcoverage 100 , similarity 99.3
, identity 98.0 , evalue 6.49e-101 , alnlength 150 ,
Eukaryota , Arthropoda , GFR20813.1 DNA helicase II
[Trichonephila clavata]"
gene      complement(5102..6364)
          /locus_tag="wEsol_00521"
CDS       complement(5102..6364)
          /locus_tag="wEsol_00521"
          /codon_start=1
          /transl_table=11
          /product="hypothetical protein"
          /pfam="UvrD-helicase Pfam-B_8467 UvrD_C"
          /tigr="TIGR01073 pcrA 725 ATP-dependent DNA helicase
PcrA"
          /translation="MVSRLVLELTGTNIPWLGTFFHAIKILRMHAEIVGLNPNTIIG
VDDQLQVIKNIINEINPDYLSEKCKTIMNIIQQWKEKCLLPSEVEDIQSFRPVYVTAL
KVYHQYQERLKF LNSVDFGDL LLYNIQLFNQKTEVLSYYQNKFKYVMVDEYQDTNAIQ
YLLLLKYLAKEHSNICCVGDDDDQSIYSWRGAEEVENILKFSDDFKNAKTVKLECN YRSTS
HILATASYVINHNKTRLEKKLWTTNIEGEKVNLIKLWDGKAEARFISEQILKLNKYRF
SDIAVLVRATFQTRVLEEYFIKYSIPYKIISGVKFYERQEV RDIIAYLRLVTNNNDL
AFERIVNRPKRSIGATTLKKIYT TAQDNKISFFEAAILVNSNQVTERIKLSLNDFLN
KIKAWEEIVSVKPLHEFVKIVANQSGIY"
          /cog="UvrD COG0210 655 Superfamily I DNA and RNA
helicases"
          /besthit="qcoverage 99.5238095238095 , hcoverage
65.5172413793103 , similarity 100 , identity 100 , evalue
2.56e-299 , alnlength 418 , Bacteria , Proteobacteria ,
WP_015589293.1 MULTISPECIES: UvrD-helicase
domain-containing protein [unclassified Wolbachia]"
gene      complement(6378..6566)
          /locus_tag="wEsol_00522"
CDS       complement(6378..6566)
          /locus_tag="wEsol_00522"
          /codon_start=1
          /transl_table=11
          /product="hypothetical protein"
          /pfam="UvrD-helicase AAA_30 AAA_19"
          /tigr="TIGR01073 pcrA 725 ATP-dependent DNA helicase
PcrA"
          /translation="MNDYLSLLNPEQQSAVTNIDGPVLILAGAGTGKTRTITSRIAHI

```

IRNGHAYSDEILAVTFHK"  
 /cog="UvrD COG0210 655 Superfamily I DNA and RNA  
 helicases"  
 /besthit="qcoverage 96.7741935483871 , hcoverage  
 53.0973451327434 , similarity 100 , identity 100 , evaluate  
 1.20e-33 , alnlength 60 , Eukaryota , Arthropoda ,  
 GFQ94843.1 probable DNA helicase II homolog  
 [Trichonephila clavata]"  
 complement(6667..>6975)  
 /locus\_tag="wEsol\_00523"  
 complement(6667..>6975)  
 /locus\_tag="wEsol\_00523"  
 /codon\_start=1  
 /transl\_table=11  
 /product="hypothetical protein"  
 /translation="NNTLASFSRSWREFKEKAYGFMYDIGTWLKETYENLTERPATHN  
 HYASKFPVKVEEREMEELNRITYKSFQTPPIHLTNSSLDQINLSLPTTSKLPNKGIYKT  
 "  
 /besthit="qcoverage 100 , hcoverage 74.4525547445255 ,  
 similarity 100 , identity 100 , evaluate 1.45e-68 ,  
 alnlength 102 , Bacteria , Proteobacteria ,  
 WP\_015589294.1 MULTISPECIES: hypothetical protein  
 [unclassified Wolbachia]"

# ORIGIN

```

1 aaatTTTTat caccgtcaat aaaaactcaa cacgtccagc agtagctact cctctaaaat
61 ttattagtgt aataattgta agtaataaca tctctaaaaa cagatgtacg ttttgaatat
121 cttcatggaa aaatggtgta agataaccaa caccacaaac tattacggct gttgtgctaa
181 cccatgagat caccaatac gtccaaccaa caaaaaaagc tgcagcaggg ccaaaagcat
241 gctttacata gacgtgaggg ccacccgttt ccggaaaattt tgcgcagagt gaggcaaaaa
301 ctaaagcaag agatatagca ccaagccctg atattatcca gcttataagg ctatacatgc
361 catatggagc aaggctaatt ggaagcataa aaattccaga gccaatTTgg ctgctaataca
421 ctaaggcaaa aatagcccaa aaacctatTT tatttgacac aataattcTT atctaaatag
481 attaacaata taccctaAAC tcagaaaattt caattgatct tttAACataa aaacttgcAT
541 ttttttcaat ttattcctaa aatagattat attaacagat tattaagagg gggttatgaa
601 tccgagatta aaagcatttt tggttgTTTT tagtattatt gcatttttga ttgcactttt
661 gtttctcgtg tattatttaa atcttcttgt taactatatc cttgaccoga ttctagtctg
721 tccctttgaa agattataca aaaacttaat tgttgatggT ctttatgcct atttatctac
781 aagcacttct agccctgcac tagcattttt ggctacaggt tttattgtta ttgctgcgtt
841 tatttgccTg aataaaatgc ttcttccctt gcaagagaag atcataaaca actataacctc
901 ctttaaaaac aacaatatTg atagcaatag catgttgTtt gaggtttata aagatccaac
961 aataaaaatta aaggacaaaa tcttattcTT cagtatacac ttgatataTT acctacagct
1021 tccattttTg tatattgcat caaaggTatc agctctacgt gggtttctta tatttaattt
1081 tggtttatta ttgttaaatt atgcactgct aattccagTg gcacttctTg aattgataaa
1141 gtatccatta gtgaggcttt tctcaccttt gggtttgaat gtaaagcagc taagcttttt
1201 gttaaTgta agtgatgtgg gcactggcag tcagagcgTt cacacgagta gttttgaaca
1261 tagtattctc caatgcgctc aagagTtaaa acagaaaattt ggagctcaac caaatgtact
1321 caataaagag tttgaagact acataaataa ttcagatgag cttacaactg agcaaaaaga
1381 gcaattaaaa ctttatctta actttaatgg ttccaatgaa gcagcttggc aagaatcaaa
1441 aactggacta actctcacac aagctgcaaa cttagtttca actgctgcta agaatacaaaa
1501 atcagatgtg aattcactat tactaatgaa tttaaaggat ggacttggTt tatgtactct
1561 gggaaTgttc gatcgtatta tttattcgct tagttgtcTT gaagcgaaaa ataatttctt
1621 ggttcaaata aatggagcag tgaacgtatt aacacctaaa tttactgaaa gatttttaaa
1681 agaataattgc aattataaaa aattaaaaat tttggtagac aagtttgaag atttttactc
1741 cgaagattat gcggataaaa ataataaag cgatgaggtg aagagcaaca ttaaccaatc
1801 aataatagaa ataagagaat ttgtctttaa agagctttac ataaaatttt acgaagagta
1861 tggaaaaagt attcaaagag gtgccataaa gcaaaaatta agggaattag ttacagatga
1921 tagtataaag gaagcagTgt attattcaat gtataatata gaaatccctg cagaaccacc
1981 tacttatctt gaaagagtaa aagcattttt tggaggtcat gcaaggtcTT ctgctgctta
2041 gtggtttagt tcgtgctata tagctaaact aacttagatt tactgacaat tttaaaacaa
2101 caaattcgtc attccgctac tagttagcgc cgcggcggtg tgacgtgttc tatagctttg

```

|      |             |             |             |             |             |             |
|------|-------------|-------------|-------------|-------------|-------------|-------------|
| 2161 | tcttcccttt  | tctgaatggc  | ttgcaagctg  | ctatctctac  | aaaaactata  | tttttcttca  |
| 2221 | gaagagagtt  | atattgtaac  | tatggacaaa  | ataatcataa  | aaaaatttgg  | tgggacttcg  |
| 2281 | ctaactgatt  | taaaccgagt  | tgcaaatttg  | ataaaaaacg  | atattgagaa  | aggttgtaat  |
| 2341 | gtaatcgttg  | ttgtatctgc  | tgttgcagga  | tttactgacc  | aatgggtttt  | tcaggctagg  |
| 2401 | caaactctca  | atttaagtta  | tagacaagag  | ttatcagagt  | atgacgttat  | gctttcagca  |
| 2461 | ggagaacaaa  | tctcttgcg   | tctattagct  | atcactctcc  | aatcgatcgg  | agttaatgct  |
| 2521 | aaatcgtggc  | ttgcctggca  | gttaccaatt  | gcaactgatg  | atttttattc  | tgagtctaaa  |
| 2581 | ataaaaacaa  | taaagattga  | acgtgtgaaa  | agatcttttg  | ctgagggtta  | tactgctgcg  |
| 2641 | atcattgctg  | gttttcagg   | tataaatgat  | gatagaatca  | ctacttttgg  | aagaggaggc  |
| 2701 | tctgatatat  | cagcagttgc  | cttcgcggtg  | gcctttggtg  | ttagaacttg  | cgaaattttt  |
| 2761 | actgatattg  | atggaatata  | tacagcagac  | ccgagaattg  | ttccaaaggc  | acgcaagctc  |
| 2821 | aaatttatct  | cttacgatga  | aatgttgga   | atgtcgtcat  | ctgggtgctaa | aatactgcat  |
| 2881 | aatcgttcag  | tacaacttgc  | aatgaaacat  | aacattaaag  | tgcaagtgct  | atccactttt  |
| 2941 | aaggaagtag  | aaggcaccac  | agtgtctcac  | aaaagggatg  | tactagagag  | atacttaatt  |
| 3001 | actggaataa  | cttatagcac  | taatgaagct  | cttgtaactt  | tcactaacct  | tgcaaataac  |
| 3061 | ttgcgtactt  | taagagatat  | agcaggagca  | aacgttaaaa  | ttgatatgat  | acatgggtca  |
| 3121 | agttttgtta  | tctccaaatt  | tgatattgat  | ttcaatggaa  | aagttactga  | ataagaatga  |
| 3181 | aaattatgct  | ataaacgata  | atgtagctaa  | aatttcaata  | attgggtattg | gtgttatgtc  |
| 3241 | taacactgaa  | gtgatgcacc  | gcacactcaa  | ggtttttaagc | gaaaaaaaaga | tagaaatact  |
| 3301 | tgctatcaca  | acatctgaaa  | tcaaaatcag  | tataattggt  | caaaaagaat  | gcgctgtagc  |
| 3361 | tttagtcaaa  | gatttacata  | ctgagtatga  | gcttgatatg  | cagcactagg  | ataggcttga  |
| 3421 | cgtccagttg  | tctaagagta  | tgtcttgaaa  | aggaatgagg  | aaaaaaatat  | gatagtgtaa  |
| 3481 | gtaaaaaata  | ggaggggaaa  | ttgtatccaa  | gtgatataag  | tgataagaaa  | tgggaaattt  |
| 3541 | tggagccaca  | tgttgcacaa  | ggaaagatag  | ggaggccaag  | aaagcacaat  | atcagaacaa  |
| 3601 | ttattaatgc  | aataaggtat  | ataatgagag  | gtggttgtca  | atggagaatg  | ctgccgaaag  |
| 3661 | attttcctcc  | atggaagacg  | gtgtatgact  | attttctcag  | gtgacgtagt  | aatggcaaat  |
| 3721 | tggaaaaaat  | acataaatatg | ctagtaaaaag | aggtaagaaa  | aatgtttggg  | aaaaatgaaa  |
| 3781 | caccttcagt  | aggaataaatt | gacagtcaat  | cagtaaaaac  | cactcaaaaa  | ggggatccag  |
| 3841 | aggatatgat  | gctgaaaaaa  | aataaagggt  | agaaaacgtc  | atattgtttg  | agatacagtg  |
| 3901 | ggcttaatta  | ttgcggctga  | tgttcatagt  | gcaagtgttc  | aagatcgtga  | tgggtgctcta |
| 3961 | aatctttttca | ctcaagctaa  | atacaaggct  | ccaactttac  | gtaagttttt  | gctgatcaag  |
| 4021 | gatacatagc  | aaaaccgctg  | tttattggag  | acaggatacg  | attaccaaga  | aagctgtttga |
| 4081 | tgttacagga  | tttttcgaca  | atctggacca  | caatttagca  | ctgcaggcta  | tcaagaagca  |
| 4141 | cacagactgc  | aaatgggtca  | tactgtatgt  | tgaaagggtg  | atgaaatccc  | ctattcagca  |
| 4201 | agcagatggc  | agtaaggtag  | ttagggaaaa  | aaggagttcc  | gcaaggagggt | tcaataagcc  |
| 4261 | caatcatttc  | aaacataattt | atgcaccatg  | catttgatat  | atggatgaaa  | caaaatcacc  |
| 4321 | caacagtacc  | atttgaaaga  | tatgtggatg  | atgcgatagt  | gcactgcaga  | actaaaagac  |
| 4381 | aggcagaatt  | tatgcgagca  | gcaattgaag  | aaagattggc  | acaatgtaag  | ctaaaattgc  |
| 4441 | aacctgatac  | caatgccatt  | ccaaaactcc  | atcattatac  | tgcttagta   | taaccttctc  |
| 4501 | acttctattg  | tctattttgtt | tgttatgtaa  | tagaaaattgg | tatgagattg  | aagaatttaag |
| 4561 | tgtgaacggt  | tacagaatttt | ttgccaaagag | aaacatatag  | ttaaagtaat  | tcagatttgt  |
| 4621 | aagatatggt  | tatctgcaat  | tatagcttca  | acagtaggca  | atgttgcttt  | taattacctc  |
| 4681 | aacattttct  | cttgccaatt  | ctttaatgaa  | ccgagaagtg  | cgcatcgggt  | gccactgggt  |
| 4741 | gttaattttcc | ctcctatctg  | cacatgaaat  | gattaacctt  | tctttggctc  | tggttatgcc  |
| 4801 | aacatatgcg  | agtctccttt  | cttcttctaa  | agctttacca  | cttttgtcat  | caaaagatct  |
| 4861 | ttgatgagga  | aataatccct  | cttcccaacc  | aggtagaaac  | acgcacggga  | attcaagtcc  |
| 4921 | tttggctgca  | tgaagagtca  | taacatatac  | ggtgtcatcg  | ttattcata   | tatccacttc  |
| 4981 | catcaccaga  | cttatatgct  | ccaagaaagt  | tgtggcatta  | tcgaaatttt  | ttaaagatga  |
| 5041 | gatgagctct  | ttaacatttt  | ctattcgtgc  | taagcctggt  | acctcctcat  | tttcaagcat  |
| 5101 | ttcaatata   | ccctgattgg  | tttgctacga  | ttttaacgaa  | ttcatgcagt  | ggttttacgc  |
| 5161 | ttactatttc  | ttcccaagct  | ttaattttat  | ttaaaaaatc  | gttgagtggag | agtttaattc  |
| 5221 | tttcggttac  | ctgattacta  | ttactaata   | tttttgctgc  | ctcaaaaaaa  | gaaattttgt  |
| 5281 | tatectgagc  | agtcgtgtat  | attttcttta  | gagttgtagc  | tcctatgctt  | ctttttggcc  |
| 5341 | gatttactat  | cctttcgaaa  | gctaagtcac  | cgttattggt  | tgtaacaagt  | cttaaatatg  |
| 5401 | caattatata  | cctgacttcc  | tgacgttcgt  | agaattttac  | gccacttata  | atcctttagg  |
| 5461 | gaattgaata  | ttttataaaa  | tactcttcga  | gaactctagt  | ttgaaaagtg  | gcccttacca  |
| 5521 | gcactgcaat  | gtcactaaat  | ctgtatttat  | tgagtttcaa  | tatctgttcg  | cttatgaacc  |
| 5581 | ttgcttcagc  | tttcccatcc  | cataatttta  | ttagattttac | cttttccctt  | tcaatgtttg  |
| 5641 | ttgtccacaa  | ttttttttct  | aagcgagtct  | tattgtgatt  | gataacatat  | gacgcagttg  |
| 5701 | caagtatgtg  | ggatgttgac  | ctgtagttac  | actctagttt  | aacggttttt  | gcatttttta  |

```

5761 aatcatcaga aaacttcaaa atattttcaa cttctgcacc acgccaacta tatatcgact
5821 ggtcatcatc tcctacacag caaatatttg agtgcctctt tgcaagggtat tttagcaaaa
5881 gatattgtat cgcatttgta tcttgatatt catctaccat gacatatatta aacttgtttt
5941 ggtagtagga cagaacttcg gtcttttgat taaagagttg tatgttatat agcaataagt
6001 caccaaaatc gacagagtta aggaatttca acctttcctg atactgggtga tagaccttga
6061 gtgcagttac atatactggc ctaaagtatt gaatatcttc cacttcagat ggcaataagc
6121 acttctcttt ccattgctga ataataattca taatgggtctt acatttttct gataggtaat
6181 caggatttat ttcattgata atatttttta ttacctgtaa ttgggtcatcc acaccaatga
6241 ttgtaaaatt ggggtttaag cccacaattt ctgctgcat gcgcaaaatt tttgctgcaa
6301 ttgcatggaa agtgccaagc catgggatgt ttgtgcccgtagctcaagt acccttgata
6361 ccatctcatt tgctgcttta tttgtgaaat gtaactgcta atatctcatc agaataagcg
6421 tgaccgtttc taattatgtg tgctattctt gaagtaatcg ttcttgtttt tcccgtcccg
6481 gtccttgcca gtatcaaaac tgggtccatct atgttagtta cagctgattg ttgttctgga
6541 tttagcagtg agagataatc gttcatcgta gccttataga ttataacttc gtaaagttaa
6601 acctatgatt gaaatattgt aaaggtttta ttgaatagaa cagttaaaga atgcttcact
6661 caagtgttac gttttgtata tacctttggt aggcagcttg gatgtgggtgg gtaacgataa
6721 attgatctga tctaggctgc tgtttgttag gtggataggt ggagtttgga atgacttata
6781 tgtacggttt agctcctcca tttctctttc ttcaacttta acaggggaact ttgaggcata
6841 gtggttatgc gttgcaggtc gttcagtgag attttcatat gtttctttca accaagttcc
6901 gatatcatat ataaatccat acgctttttc tttaaattct ctccatgata tactgaaact
6961 tgctagtgtg ttatt

```

```

//
LOCUS      JAQZAU010000054                61158 bp    dna        linear    ENV 17-MAR-2023
DEFINITION MAG: Wolbachia pipientis isolate wEsol contig_34079, whole genome
            shotgun sequence.
ACCESSION  JAQZAU010000054 JAQZAU010000000
VERSION    JAQZAU010000054.1
DBLINK     BioProject: PRJNA929258
            BioSample: SAMN33142973
KEYWORDS   WGS; ENV; Metagenome Assembled Genome; MAG.
SOURCE     Wolbachia pipientis (insect metagenome)
ORGANISM   Wolbachia pipientis
            Bacteria; Pseudomonadota; Alphaproteobacteria; Rickettsiales;
            Anaplasmataceae; Wolbachieae; Wolbachia.
REFERENCE  1 (bases 1 to 61158)
AUTHORS    Fiutek,N., Couger,B.M., Roy,S., de la Torre,J.R. and Connor,E.F.
TITLE      Genomic assessment of the contribution of the Wolbachia
            endosymbiont of Eurosta solidaginis to gall-induction
JOURNAL    International Journal Molecular Sciences
REFERENCE  2 (bases 1 to 61158)
AUTHORS    Fiutek,N., Couger,B.M., Roy,S., de la Torre,J.R. and Connor,E.F.
TITLE      Direct Submission
JOURNAL    Submitted (10-FEB-2023) Biology, San Francisco State University,
            1600 Holloway Ave, San Francisco, CA 94132, USA
COMMENT    ##Genome-Assembly-Data-START##
            Assembly Date      :: JUN-2019
            Assembly Method    :: FLYE v. 06-2019
            Genome Representation :: Full
            Expected Final Version :: Yes
            Genome Coverage     :: 100.0x
            Sequencing Technology :: Illumina HiSeq; PacBio Sequel
            ##Genome-Assembly-Data-END##
FEATURES   Location/Qualifiers
            source              1..61158
                                   /organism="Wolbachia pipientis"
                                   /mol_type="genomic DNA"
                                   /submitter_seqid="contig_34079"
                                   /isolate="wEsol"
                                   /isolation_source="galls on Solidago altissima"
                                   /host="Eurosta solidaginis MN-2018-EFC"

```

```

/db_xref="taxon:955"
/environmental_sample
/country="USA: Cowling Arboretum, Carleton College,
Northfield, MN"
/lat_lon="44.48 N 93.13 W"
/altitude="280 m"
/collection_date="2018-11"
/metagenome_source="insect metagenome"
/note="metagenomic"
gene complement(<1..629)
/locus_tag="wEsol_00524"
CDS complement(<1..629)
/locus_tag="wEsol_00524"
/codon_start=1
/transl_table=11
/product="hypothetical protein"
/pfam="ParB Pfam-B_14045 HTH_Crp_2 KorB"
/tigr="TIGR00180 parB_part 186 ParB/RepB/Spo0J family
partition protein"
/translation="MKDDRRLGRGLAGLIGDNYDNKEDRQEHLPISSLHPSKFQPRKH
FDEESLRELANSIKKSGIIQPIVVRKDSNDDGYEIIAGERRWRASKIANLDSAPVLIK
DLSDKECLEVSIIEINIQRQDINPIEEGEAYRKLIDEFFYTHEELASAIGKSRSHITNM
IRMLLLPDRVKTMINKEKLSMGHARALINVENAESIAEKIVSQGLSVRQ"
/cog="Spo0J COG1475 240 Stage 0 sporulation protein J
(antagonist of Soj) containing ParB-like nuclease domain"
/besthit="qcoverage 100 , hcoverage 79.467680608365 ,
similarity 100 , identity 100 , evalue 4.13e-143 ,
alnlength 209 , Eukaryota , Arthropoda , XP_044573786.1
probable chromosome-partitioning protein ParB [Drosophila
ananassae]"
gene complement(626..1468)
/locus_tag="wEsol_00525"
CDS complement(626..1468)
/locus_tag="wEsol_00525"
/codon_start=1
/transl_table=11
/fullproduct="qcoverage 100 , hcoverage 100 , similarity
100 , identity 100 , evalue 1.14e-190 , alnlength 280 ,
Bacteria , Proteobacteria , WP_006280226.1 MULTISPECIES:
AAA family ATPase [Wolbachia]"
/cog="Soj COG1192 259 ATPases involved in chromosome
partitioning"
/pfam="Pfam-B_3718 Pfam-B_2460 AAA_31 MipZ YhjQ
Pfam-B_4013 CbiA ArsA_ATPase Fer4_NifH"
/product="AAA family ATPase"
/translation="MSKIIAIVNQKGGVGKTTTSINLSTAFAAVGKSTLLVDLDPQGN
ASTGLGISYRSREEKNYKILLSENKLIESAIFNIKEIPNLSLISSVVDLSAAEIEL
SQLERGKFLKSALEKIRDNYEYIIIDCPPSLGLLTINALTAANSIIVPLQCEFFALE
GLSHLVKTVELIKRNNLNPFLAIEGIVLTMYDRRNKLSEQIKNDICQYLNDKVYKTII
PLYETVIPRNVRLSEAPSHGKPAIVYDLKCPGAQAYISLAREILKKHASSCKEKKLVS
EGVV"
/besthit="qcoverage 100 , hcoverage 100 , similarity 100
, identity 100 , evalue 1.14e-190 , alnlength 280 ,
Bacteria , Proteobacteria , WP_006280226.1 MULTISPECIES:
AAA family ATPase [Wolbachia]"
gene complement(1559..4042)
/locus_tag="wEsol_00526"
CDS complement(1559..4042)
/locus_tag="wEsol_00526"
/codon_start=1

```

```

/transl_table=11
/pfam="PAS_8 PAS_9 Pfam-B_10272 HisKA HATPase_c
Response_reg"
/fullproduct="qcoverage 100 , hcoverage 100 , similarity
100 , identity 100 , evalue 0.0 , alnlength 827 ,
Bacteria , Proteobacteria , WP_174516849.1 response
regulator [Wolbachia endosymbiont of Cardiocondyla
obscurior]"
/translation="MSKRYIDNKKENRVDFILRNYGMSIVVMAVIMLLPPVAISILYF
FDIYSQHINIEINLLVSILTTLFMMYNVKRYRYLLNTIEFQNAIFANALNHNTFYLI
LHKDEGVIYADARFYERFKDHIIDDDITLGKILEIGDVSEADKKVLYHALKNNSSVQV
CISLNKKNRVSNFLLLFEPIDNPQIAINSNKILNLSLVPIARPDPGYFVLKATQINKE
QIYEELIEKHSIGTYIANAKGVILSVNKRFLDIFELKKLEKGSSISDFISQSKYNNTI
TDNEILFFTISGIPFKAYMSTAIFCDKYNHSYIYGFITPTESNLVDYQLHPCFANSSI
AIAQCDINGNFVKNTALIKLAGSDNNSIFTLILDSYHVKIREYFSSNRINNASFDVQ
LNGGNKIYFNKFLHNKMIFILCYFIDNTEHKNLEIKLEHYQKMQAIGQLAGGIAHD
FNNILTGIIGFCDLLLLQHSAGDPSFGDIIQIQQNAKGRSNLVRQLLAFSRRQTLQPK
IIDVNNTIANLYEMIKRLIGENIKFNIYYGRDLGAVRADQGQLEQVILNLAVNASAM
EKGGELTIRTFNQKIDSLNSTPQDMFSPDKEAIEHGNVYVIEVIDTGCGMTSDTTEKI
FDPFFSTKDITSGTGLGLSTVYGIKQTEGYIYVASKVNHGTFKSIFLPMVYISDEND
REEDSEETKPVVSEIKNGIILLIEDEDSVREFISKALKRKGFDVIEASIGSEALEI
ISKKSQHIDLIIITDVIMPEVSGPEIVKEALHRPNINVIFISGYAEDAFLKSDDINIE
DFHFLPKPFTLNELGNKVQSVLHKAKKTV"
/product="response regulator"
/besthit="qcoverage 100 , hcoverage 100 , similarity 100
, identity 100 , evalue 0.0 , alnlength 827 , Bacteria ,
Proteobacteria , WP_174516849.1 response regulator
[Wolbachia endosymbiont of Cardiocondyla obscurior]"
gene 4203..5027
/locus_tag="wEsol_00527"
CDS 4203..5027
/locus_tag="wEsol_00527"
/codon_start=1
/transl_table=11
/fullproduct="qcoverage 100 , hcoverage 100 , similarity
100 , identity 100 , evalue 2.87e-206 , alnlength 274 ,
Bacteria , Proteobacteria , WP_015589449.1 MULTISPECIES:
oxygen-dependent coproporphyrinogen oxidase [unclassified
Wolbachia]"
/cog="HemF COG0408 303 Coproporphyrinogen III oxidase"
/pfam="Coprogen_oxidas"
/product="oxygen-dependent
coproporphyrinogen oxidase"
/translation="MEKQRTQAFKWFCALRDKIIESFLLIEKQSSAEPKIEKRKWDRP
GGGGGESTIIFGNVFEKVG VNVSKVHGKFADS AINEIPGASESNGEFWASGISLVSHM
QSPLIPAAHMNTRLIYTSKQWFGGGMDFTP IYRNEEDCKYIHESI KMTCDRFD TGYP
KFKEQCDNYFFLQHRKEPRGIGGIFYDNLSSGNWENDFEFTKAVGEAFLEIYSHVIRK
HMQKSWTKEQRENQLIKRGYVEFNLLYDRGTRFGLMTDGNPDAIMMSMPPLVKWL"
/besthit="qcoverage 100 , hcoverage 100 , similarity 100
, identity 100 , evalue 2.87e-206 , alnlength 274 ,
Bacteria , Proteobacteria , WP_015589449.1 MULTISPECIES:
oxygen-dependent coproporphyrinogen oxidase [unclassified
Wolbachia]"
gene 5076..6320
/locus_tag="wEsol_00528"
CDS 5076..6320
/locus_tag="wEsol_00528"
/codon_start=1
/transl_table=11
/pfam="Ank_2 CagA"

```

```

/fullproduct="qcoverage 100 , hcoverage 100 , similarity
100 , identity 100 , evalule 1.11e-253 , alnlength 414 ,
Bacteria , Proteobacteria , WP_015589448.1 MULTISPECIES:
hypothetical protein [unclassified Wolbachia]"
/translation="MIVSFYIGGIIMGIIDNFLIKSVKNNDIKGVKLTLLLYDALNSF
RKFFSKTMSLKNTGSFDINNNQALNQALGHATDHKIMELLINRGADIHSIDENGKNVI
IRVIESLAESKNLKLDSKLNPAEII LHPTVSFLLGKGAEEYSTDLDNVEAIQQKPPR
TSEYEPITMYAEVNNNVIPPQKPSRTFEYKPKSTNYDALPSKEPIYAEVYDAKVSNSL
GENGYLSVSEESIYAEIYDSHKKSTENLSLED SGYLSISEEPIYCTIDDLSEQKPPAS
LKQKEPEQSSEPIYARVDLSKKRAERKAKDIKANS GTCHGLVQDKVNDWQVKLNELSA
NKSISQQQTNDQKIKTKAGFSVEEIRQKYERRDSGYDSGYSDTKVEQQLELAPKSEI
GSVSIHGVIGGCYKITDISL"
/product="hypothetical protein"
/besthit="qcoverage 100 , hcoverage 100 , similarity 100
, identity 100 , evalule 1.11e-253 , alnlength 414 ,
Bacteria , Proteobacteria , WP_015589448.1 MULTISPECIES:
hypothetical protein [unclassified Wolbachia]"
gene 6489..6890
/locus_tag="wEsol_00529"
CDS 6489..6890
/locus_tag="wEsol_00529"
/codon_start=1
/transl_table=11
/product="16S rRNA (uracil(1498)-N(3))-methyltransferase"
/pfam="Methyltrans_RNA"
/tigr="TIGR00046 TIGR00046 240 RNA methyltransferase,
RsmE family"
/translation="MGKIRLYVEEALSQGVSLALNPQQSHYICNVMRLKKYDNLSLFN
GKDGEWLGEVVNISRKLT KITLKECAKQQQYEENLYLYCAMVKSAALNNIVRQATEMG
ITCIQFISTERTVVKNINLSRAKLQAIEAAE"
/cog="COG1385 COG1385 246 Uncharacterized protein
conserved in bacteria"
/besthit="qcoverage 100 , hcoverage 58.33333333333333 ,
similarity 100 , identity 100 , evalule 2.92e-87 ,
alnlength 133 , Bacteria , Proteobacteria ,
WP_015589447.1 MULTISPECIES: 16S rRNA
(uracil(1498)-N(3))-methyltransferase [unclassified
Wolbachia]"
gene 6900..7175
/locus_tag="wEsol_00530"
CDS 6900..7175
/locus_tag="wEsol_00530"
/codon_start=1
/transl_table=11
/product="16S rRNA (uracil(1498)-N(3))-methyltransferase"
/pfam="Methyltrans_RNA"
/tigr="TIGR00046 TIGR00046 240 RNA methyltransferase,
RsmE family"
/translation="MSIPEILPPINFCELPDSQSKNFVLCDETGKADKVLKGKKNVAI
IVGPEGGFSSYELDLADKFCQKLSLGLKRILRVDTAVVAALTFTNWCS"
/cog="COG1385 COG1385 246 Uncharacterized protein
conserved in bacteria"
/besthit="qcoverage 100 , hcoverage 79.1304347826087 ,
similarity 100 , identity 98.9 , evalule 1.05e-58 ,
alnlength 91 , Bacteria , Proteobacteria , WP_146038223.1
RsmE family RNA methyltransferase, partial [Wolbachia sp.
wMel_KL]"
gene 7658..7858
/locus_tag="wEsol_00531"
CDS 7658..7858

```

```

/locus_tag="wEsol_00531"
/codon_start=1
/transl_table=11
/fullproduct="qcoverage 100 , hcoverage 100 , similarity
100 , identity 100 , evaluate 1.34e-27 , alnlength 66 ,
Bacteria , Proteobacteria , WP_006279819.1 MULTISPECIES:
30S ribosomal protein S21 [Wolbachia]"
/cog="RpsU COG0828 67 Ribosomal protein S21"
/pfam="Ribosomal_S21"
/tigr="TIGR00030 S21p 58 ribosomal protein S21"
/product="30S ribosomal
protein S21"
/translation="MIEVSVHYGDVDRALPVLKKTIQKEGRGLKMKKQYHEKKSEKRA
KKKAEAKKKRYQQECRRQRYGW"
/besthit="qcoverage 100 , hcoverage 100 , similarity 100
, identity 100 , evaluate 1.34e-27 , alnlength 66 ,
Bacteria , Proteobacteria , WP_006279819.1 MULTISPECIES:
30S ribosomal protein S21 [Wolbachia]"
gene 7896..9047
/locus_tag="wEsol_00532"
CDS 7896..9047
/locus_tag="wEsol_00532"
/codon_start=1
/transl_table=11
/fullproduct="qcoverage 100 , hcoverage 100 , similarity
100 , identity 100 , evaluate 8.51e-263 , alnlength 383 ,
Bacteria , Proteobacteria , WP_015589445.1 MULTISPECIES:
ADP-forming succinate--CoA ligase subunit beta
[unclassified Wolbachia]"
/cog="SucC COG0045 387 Succinyl-CoA synthetase, beta
subunit"
/pfam="ATP-grasp_2 ATP-grasp_5 GARS_A Ligase_CoA"
/tigr="TIGR01016 sucCoAbeta 386 succinate-CoA ligase,
beta subunit"
/product="ADP-forming
succinate--CoA ligase subunit beta"
/translation="MNIHEYQAKEVLHKFNVPVPGFVATSAAEVKTQVSQKSDVFFV
VKAQIHAGGRGKAGGVKLAKSVEEAQGFVKDMIGMTLVTHQTGPSGQQVRKVYVEEGS
SIKKEYYLSLVIDPKLSRPIFIFSSSEGGMDIEEVAKNSPAKIVKFDIDSATSFDSSKL
SSSFDLSPEQIEKISNIAKKIYDAFIATDASQIEINPLVETNSGDFIALDAKINFDDN
ALYRHPPEIMELRDYDEEVKEEIEASKYGLSYIKMDGSIGCMVNGAGLAMATMDIIKYY
GAEPANFLDVGGGASKETVTEAFKIIILSDSNVKGILVNIFFGGIMRCDIIASGIVAAAK
EMSIKVPLVVRLSGTNFEEGKKILEESGLNIIAADELGDAAQKIVKEVK"
/besthit="qcoverage 100 , hcoverage 100 , similarity 100
, identity 100 , evaluate 8.51e-263 , alnlength 383 ,
Bacteria , Proteobacteria , WP_015589445.1 MULTISPECIES:
ADP-forming succinate--CoA ligase subunit beta
[unclassified Wolbachia]"
gene 9051..9926
/locus_tag="wEsol_00533"
CDS 9051..9926
/locus_tag="wEsol_00533"
/codon_start=1
/transl_table=11
/fullproduct="qcoverage 100 , hcoverage 100 , similarity
100 , identity 100 , evaluate 2.96e-203 , alnlength 291 ,
Bacteria , Proteobacteria , WP_015589444.1 MULTISPECIES:
succinate--CoA ligase subunit alpha [unclassified
Wolbachia]"
/cog="SucD COG0074 293 Succinyl-CoA synthetase, alpha

```

```

subunit"
/pfam="CoA_binding Succ_CoA_lig Ligase_CoA"
/tigr="TIGR01019 sucCoAalpha 286 succinate-CoA ligase,
alpha subunit"
/product="succinate--CoA
ligase subunit alpha"
/translation="MSVLVNKDTRLICQGFTGAQGTFFHSEQAIDYGTKMVGGVTPGKG
GSTHLNLPVFNTVAEAKEKTGANATVIYVPAKFAAAAILEAIDAKIELIICITEGIPI
LDMVKVKRALIGSKSRLIGPNCPGIITPEECKIGIMPGHIHKGHIGIMSRSGTLTYE
AVAQTTAVGLGQSTCIGIGGDPIHGMTFVDCMELFLKDDDDTHGIVVIGEIGGNEEDV
SHFVKTEKTKKPIVGFVAGQTAPPGRRMGHAGAIISSSGGSAGAKLEVMSAGIAIAE
TPAVIGKKVLEVMHH"
/besthit="qcoverage 100 , hcoverage 100 , similarity 100
, identity 100 , evalue 2.96e-203 , alnlength 291 ,
Bacteria , Proteobacteria , WP_015589444.1 MULTISPECIES:
succinate--CoA ligase subunit alpha [unclassified
Wolbachia]"
gene complement(9935..10726)
/locus_tag="wEsol_00534"
CDS complement(9935..10726)
/locus_tag="wEsol_00534"
/codon_start=1
/transl_table=11
/fullproduct="qcoverage 100 , hcoverage 100 , similarity
100 , identity 100 , evalue 5.09e-190 , alnlength 263 ,
Bacteria , Proteobacteria , AOV87829.1 diaminopimelate
epimerase [Wolbachia endosymbiont of Drosophila
incompta]"
/cog="DapF COG0253 272 Diaminopimelate epimerase"
/pfam="DAP_epimerase DAP_epimerase"
/tigr="TIGR00652 DapF 270 diaminopimelate epimerase"
/product="diaminopimelate epimerase"
/translation="MMSGQNSENFIMHGTGNNFVIIDSRSTNNLDWNHRQIADQSSC
DQVIIITMSNAADCFMHIYNADGSRAEMCGNAARCVGYLIMSEKGAEYSIIELTSKRI
LECFKVGDKSIKVNMGKPLLKWHEIPLSTECDTLHLPIELEMLKDPVAVNIGNPHIVF
FVDNISEIPLRNLGPKLENHALFPRKINVSIQAQVEKSGEIALRVWERGTGITASCGSA
ACAALVASTLRGYLVAAQTSVNLPGGKLLIEWANNVFMETGDIGFL"
/besthit="qcoverage 100 , hcoverage 100 , similarity 100
, identity 100 , evalue 5.09e-190 , alnlength 263 ,
Bacteria , Proteobacteria , AOV87829.1 diaminopimelate
epimerase [Wolbachia endosymbiont of Drosophila
incompta]"
gene complement(10704..11291)
/locus_tag="wEsol_00535"
CDS complement(10704..11291)
/locus_tag="wEsol_00535"
/codon_start=1
/transl_table=11
/fullproduct="qcoverage 100 , hcoverage 100 , similarity
100 , identity 100 , evalue 9.30e-141 , alnlength 195 ,
Bacteria , Proteobacteria , WP_006279823.1 MULTISPECIES:
nitroreductase family protein [Wolbachia]"
/cog="NfnB COG0778 207 Nitroreductase"
/pfam="Nitroreductase"
/tigr="TIGR02476 BluB 205 5,6-dimethylbenzimidazole
synthase"
/product="nitroreductase
family protein"
/translation="MNYLCTIKLKMMSKQDLLSLMKARHSGRSYDPTRAISQEDMDIL
MEAVRLTPSCFGDEPWRYVICNKQNNQSAWEKLLNCLDESNQKWAKDAQVLIISLSAK

```

```

NFRKQKGKGENLWANHDTGAANYGLMLQAAMNLMMAHQMGGFDRDKIVKEFNIPNDFNV
MSVIAVGEEEEGAETSKKKRRPIEEIFFYDEWPKF"
/besthit="qcoverage 100 , hcoverage 100 , similarity 100
, identity 100 , evalue 9.30e-141 , alnlength 195 ,
Bacteria , Proteobacteria , WP_006279823.1 MULTISPECIES:
nitroreductase family protein [Wolbachia]"
gene 11377..11904
/locus_tag="wEsol_00536"
CDS 11377..11904
/locus_tag="wEsol_00536"
/codon_start=1
/transl_table=11
/fullproduct="qcoverage 100 , hcoverage 100 , similarity
100 , identity 100 , evalue 6.38e-111 , alnlength 175 ,
Bacteria , Proteobacteria , WP_015589442.1 MULTISPECIES:
biotin transporter BioY [Wolbachia]"
/cog="BioY COG1268 184 Uncharacterized conserved protein"
/pfam="BioY"
/product="biotin transporter
BioY"
/translation="MFITQSSSRSTLAEILSCVLLLFLMAQISIPVLPITLQTLGV
MLIGLKFNRRRTAFYSVLTYLSLGAAGLPVLANFSGGYHALLGPTGGYLIGCLAAMVM
SKVNELLNSKYKSFVCNSLSCLAGTVVIFICGVSWLAVYLGGLQAIMVGVLFPILPGL
IKIFLLVAALQYLKK"
/besthit="qcoverage 100 , hcoverage 100 , similarity 100
, identity 100 , evalue 6.38e-111 , alnlength 175 ,
Bacteria , Proteobacteria , WP_015589442.1 MULTISPECIES:
biotin transporter BioY [Wolbachia]"
gene 11928..12290
/locus_tag="wEsol_00537"
CDS 11928..12290
/locus_tag="wEsol_00537"
/codon_start=1
/transl_table=11
/fullproduct="qcoverage 100 , hcoverage 100 , similarity
100 , identity 100 , evalue 5.85e-85 , alnlength 120 ,
Bacteria , Proteobacteria , WP_227738570.1 DUF1284
domain-containing protein [Wolbachia endosymbiont of
Drosophila simulans]"
/cog="COG3543 COG3543 135 Uncharacterized conserved
protein"
/pfam="DUF1284"
/product="DUF1284 domain-containing
protein"
/translation="MCTLAFRGYGYSGGFVENYKRIASKVISTQIEVVGNLNICSAC
PNQTKQGKCTTQAKVLELDRRHMEILGIKIGETLTWNEAVKKIREKMSLKKFEYACEG
CNWQPYGICKNALLNLQR"
/besthit="qcoverage 100 , hcoverage 100 , similarity 100
, identity 100 , evalue 5.85e-85 , alnlength 120 ,
Bacteria , Proteobacteria , WP_227738570.1 DUF1284
domain-containing protein [Wolbachia endosymbiont of
Drosophila simulans]"
gene 12459..13334
/locus_tag="wEsol_00538"
CDS 12459..13334
/locus_tag="wEsol_00538"
/codon_start=1
/transl_table=11
/pfam="Pfam-B_3485 Pfam-B_1969 Pfam-B_333 Pfam-B_10017
Pfam-B_3875 TPR_16 TPR_18 Pfam-B_121 YfiO Tcf25 TPR_11

```

TPR\_12 Pfam-B\_1822 Pfam-B\_1799 Pfam-B\_392 Apc3 TPR\_8  
 TPR\_2 TPR\_1 TPR\_7 TPR\_6 TPR\_14 TPR\_11 Pfam-B\_333  
 Pfam-B\_8853 TPR\_11 TPR\_12 TPR\_1 TPR\_8 TPR\_2"  
 /fullproduct="qcoverage 100 , hcoverage 100 , similarity  
 100 , identity 100 , evalue 5.11e-204 , alnlength 291 ,  
 Bacteria , Proteobacteria , WP\_174516848.1 MULTISPECIES:  
 tetratricopeptide repeat protein [unclassified  
 Wolbachia]"  
 /translation="MLRIAQRNKVYWLHAAANATTLGPMFICMLICVVILWRSSVITYA  
 SENLEIQKAFDSVVKHIKADKKYKDFDVIERKSDKFNIKISQNSGKSFDIYSTLKKAK  
 DSFESGDNEAAISLLNQIIAKFPYHKNALIGLNIYYANKEYKKAIVEIYTRLLKEHPS  
 NPYILKNFLTIIISQYDPDLALSEMLKLYDIHKNYAPLLANLGLIYMKKEDYVKGKEYM  
 ITAISLDENNIFYTYNLAVILDKLSDFQNTIFYLKLLNMATTSKDVSEKIPLYKVTA  
 RLKFIKLHSTHPKIS"  
 /product="tetratricopeptide  
 repeat protein"  
 /besthit="qcoverage 100 , hcoverage 100 , similarity 100  
 , identity 100 , evalue 5.11e-204 , alnlength 291 ,  
 Bacteria , Proteobacteria , WP\_174516848.1 MULTISPECIES:  
 tetratricopeptide repeat protein [unclassified  
 Wolbachia]"  
 gene 14300..17008  
 /locus\_tag="wEsol\_00539"  
 CDS 14300..17008  
 /locus\_tag="wEsol\_00539"  
 /codon\_start=1  
 /transl\_table=11  
 /fullproduct="qcoverage 100 , hcoverage 100 , similarity  
 99.8 , identity 99.8 , evalue 0.0 , alnlength 902 ,  
 Bacteria , Proteobacteria , WP\_141456691.1 MULTISPECIES:  
 DNA gyrase subunit A [unclassified Wolbachia]"  
 /cog="GyrA COG0188 804 Type IIA topoisomerase (DNA  
 gyrase/topo II, topoisomerase IV), A subunit"  
 /pfam="DNA\_topoisoIV DNA\_gyraseA\_C DNA\_gyraseA\_C  
 DNA\_gyraseA\_C DNA\_gyraseA\_C DNA\_gyraseA\_C DNA\_gyraseA\_C"  
 /tigr="TIGR01063 gyrA 800 DNA gyrase, A subunit"  
 /product="DNA gyrase subunit  
 A"  
 /translation="MQDNIVPISIVKELEDSYLSYAMSVIIISRAIPDVRDGFKPVHRR  
 ILYAMSRAGFDAGKPYKKAARIVGDVMGKYHPHGDAAIYDSLVRMAQDFSLLLPLVDG  
 QGNFGSIDGDPPASMRYTEARLQKVSHFLNDIDEDTVNFRPNYDGNETEPVVLPAEF  
 PNLLVNGASGVAVGMATNIPSHNLGEIIDACILYVNNPEVTLDELLEVMPGPDFPTGG  
 TILGRSGIRSAFATGRGSIVVQKGKTHIEDLPQDRQAIVIDEIPYQVNVKVKLIEKIGEL  
 VKEKRIDGITEIRDESDKSGIRVVIDLKRNAEASFILNQILGLTPLRSSFSVNTLVLN  
 NNRPALMSLKEIIEAFIDFRKEVLIRRTFRLRKTREKAHIYIGLYIAVLSIDEVIKI  
 IRGAKDPAEASRELLNKEWKTSNEINTIIEELISDSASFLKDGVRRLTELQIKAILDMK  
 LQRLTGLEKDKLEAELSSMINLIKEYIAFLGSGEKLKMEIKNNLQEIKNRFAVPRKTS  
 IEESDVIEAEDLIPQEDMVITVTMNGYIKRVKLSHYRTQRRGGKGKLGQGLKEEDVI  
 TELFVGNTHTSFLFFSNIGRVYRLKVYKLPLAEPTARGRALVNIFFPLSDGETITNIMP  
 LPSENDENQNIVFATAYGNIRNRSLADFHYPNSGKIAIKLDEGDKLVSVKVCNEIDH  
 VLLSTTLGKSIRFVVSVDVRQFKSRNSDGVRGIKLVKNDVISMTILNGIGVTTETKEL  
 YLKVPLAKRLGTAINNSIDSKLEKTLNDLGIDNELFLKLAVNEEFILTITENGFGKRT  
 SAYEYRVNTRGGVGITNILTTSRNGNVVASFPVEQGDNIMLITDKGKLIRISVNEIRI  
 AGRSTQGVTLFKTESREKVVSVAKIEDPDSTEDSIFEVENSISSQP"  
 /besthit="qcoverage 100 , hcoverage 100 , similarity 99.8  
 , identity 99.8 , evalue 0.0 , alnlength 902 , Bacteria ,  
 Proteobacteria , WP\_141456691.1 MULTISPECIES: DNA gyrase  
 subunit A [unclassified Wolbachia]"  
 gene 17095..17694  
 /locus\_tag="wEsol\_00540"

CDS 17095..17694  
 /locus\_tag="wEsol\_00540"  
 /codon\_start=1  
 /transl\_table=11  
 /fullproduct="qcoverage 100 , hcoverage 100 , similarity 100 , identity 100 , evalue 2.27e-143 , alnlength 199 , Bacteria , Proteobacteria , WP\_015589439.1 MULTISPECIES: ubiquinol-cytochrome c reductase iron-sulfur subunit [unclassified Wolbachia]"  
 /cog="QcrA COG0723 177 Rieske Fe-S protein"  
 /pfam="UCR\_Fe-S\_N Rieske"  
 /tigr="TIGR01416 Rieske\_proteo 176 ubiquinol-cytochrome c reductase, iron-sulfur subunit"  
 /product="ubiquinol-cytochrome c reductase iron-sulfur subunit"  
 /translation="MDKNLTKNKKPLANKEDKKTPPVKDLTKNKSRRDFITLTTCAMAGIGAASGLWPLVKSMNPSEVLATSTVEVNLSGIQEGHGVKVKWQGKPVFIRRRTKQEIEAARAVNVKSLRDPQLDEQRVYEGKDEWLIMLGICTHLGCVPDHATRDGNGWFCPC HGSYYDTSGRVIGGPAPKNMAVPDYFFPSENVVVIGKKA"  
 /besthit="qcoverage 100 , hcoverage 100 , similarity 100 , identity 100 , evalue 2.27e-143 , alnlength 199 , Bacteria , Proteobacteria , WP\_015589439.1 MULTISPECIES: ubiquinol-cytochrome c reductase iron-sulfur subunit [unclassified Wolbachia]"

gene complement(17704..20046)  
 /locus\_tag="wEsol\_00541"

CDS complement(17704..20046)  
 /locus\_tag="wEsol\_00541"  
 /codon\_start=1  
 /transl\_table=11  
 /pfam="Pfam-B\_4868 ResIII DEAD AAA\_19 Pfam-B\_14354 Pfam-B\_4868 Pfam-B\_19902 Pfam-B\_4868 Helicase\_C"  
 /fullproduct="qcoverage 100 , hcoverage 100 , similarity 99.9 , identity 99.9 , evalue 0.0 , alnlength 780 , Bacteria , Proteobacteria , WP\_015589438.1 MULTISPECIES: primosomal protein N' [unclassified Wolbachia]"  
 /translation="MLNSITMAKTVDVLLSLPIDQLFSYAIEENTEILLGDYVVVPFGKKRLIGIVWKYSDKSNRELKFIEQKIDLPNIRTKLIAFAEWVAQYNLIPIGMLAKVIMGGVLKVNHIDKLVCVEQKQETSEISCQLSPEQQIASDKIISNLNEYSVTLLDGETGSGKTEVYLSVIAQLIKNYTAVPNAAQTLPSQCPETQLYEHCDLGLPRGCPSSLTLGSSF SYNLITNVYFNLKPIPNLQSKFLDSSVKHWNDFILKAKPTVTFSIPSLPRTSMTPEY VEMTSGEANTQILILLPEIVLTSQLVNRVRGQISKNLVEWHSGLTPKTRRNNWLNIAN GNAQIIIGARSALFLPYKNLKLIIIVDEEHDSSFQEQGIIYNARDMAIILAKFENIPI ILSSATPLLETIHVKNNGNYNHVKLTKRFGGAELPLIKVVDNRNNKQWISSELFESIK QTIEKKQQVMLFLNRRGYAQLAICKKCGYKISCLNCAVWLTYHKKKNALLCHHCYSYQL KLPEKCSNCQSEQPLSLYGIGIERLLEEMVKLIPNAKTAMISSDQKSVSNIIDLVLKE EVNIIIGTQIIAKGHNFPKLTLVGVINADLSLENSDLRAAEKTYQLLHQVAGRSGRFN EKG MVIVQTNNPESSIIKALLHQKRDSFYEIELKSRREAKMPF SRLIALIICGKNQI ATQKAANEIVKSLLCYPSSLTTCIQEKNVGVDKKEFEILGPSPAAINFLNNKYRHRVL LKIH NKHSLSIQKKLKYWIKNCNLNSSIAVIIDVDPVSFF"  
 /product="primosomal protein N'"

gene complement(17704..20046)  
 /locus\_tag="wEsol\_00541"

CDS complement(17704..20046)  
 /locus\_tag="wEsol\_00541"  
 /codon\_start=1  
 /transl\_table=11  
 /pfam="Pfam-B\_4868 ResIII DEAD AAA\_19 Pfam-B\_14354 Pfam-B\_4868 Pfam-B\_19902 Pfam-B\_4868 Helicase\_C"  
 /fullproduct="qcoverage 100 , hcoverage 100 , similarity 99.9 , identity 99.9 , evalue 0.0 , alnlength 780 , Bacteria , Proteobacteria , WP\_015589438.1 MULTISPECIES: primosomal protein N' [unclassified Wolbachia]"

gene 20191..21975  
 /locus\_tag="wEsol\_00542"

CDS 20191..21975  
 /locus\_tag="wEsol\_00542"

```

/codon_start=1
/transl_table=11
/pfam="Pfam-B_150"
/fullproduct="qcoverage 100 , hcoverage 100 , similarity
100 , identity 100 , evalue 0.0 , alnlength 594 ,
Bacteria , Proteobacteria , WP_141456689.1 MULTISPECIES:
hypothetical protein [unclassified Wolbachia]"
/translation="MVNDKITLNFIEIEKGEPIDRYYFSAHIKLTDESKNLLREKLGST
IQFDNLDDHFNLNHENFYIYYNKYSEHNGRSELHVRDDNGKYLTSLNPLNYYGFSMEL
SPDGASIADYGfYPLYAIYNPNHYNKAKEKVFDDHGELSPIASNVLDNFLSNTNSLT
QDILQNVFSQLQKKADEEAERLAREREAERQREEELNEKNEELKELVEKDEIKIFKV
KGNLDLGNHSAVVLQLDGEEDKIPLDSSKYIIAEYRHHPEWEGDEYLN FVSPDS
VNYENLFFVLNQSSYSDFESGFYSENRTDPHNYAKYSKEPYLSGDQLSEKLSNELEED
SNQIGTEFTIDDEQVDEEVVVESEAKSGEKGTVGEDNAKNTIQEEESNYIDQMADD
SSYPALQSNRDDYADTKKALQEKHLGDEIHKQSNEKAQKDIEVKKVTVETDSSSNKT
EKQTKPTEDEQETVMASVIENMDKNSDIEAETSNSVANSQHPLKIKTGSPLEVGKYK
ELQVTYDDVKNFYDTVRGKYHAGDGYNYEQVMVLYNEIVRPAHNHHYELFTLDEAHV
NDHLFIKGQDFGTLNDFNEMFYKSDELM"
/product="hypothetical protein"
/besthit="qcoverage 100 , hcoverage 100 , similarity 100
, identity 100 , evalue 0.0 , alnlength 594 , Bacteria ,
Proteobacteria , WP_141456689.1 MULTISPECIES:
hypothetical protein [unclassified Wolbachia]"
gene complement(22048..22902)
/locus_tag="wEsol_00543"
CDS complement(22048..22902)
/locus_tag="wEsol_00543"
/codon_start=1
/transl_table=11
/fullproduct="qcoverage 100 , hcoverage 100 , similarity
100 , identity 100 , evalue 7.29e-205 , alnlength 284 ,
Bacteria , Proteobacteria , WP_015589436.1 MULTISPECIES:
FAD-dependent thymidylate synthase [Wolbachia]"
/cog="THY1 COG1351 273 Predicted alternative thymidylate
synthase"
/pfam="Thy1"
/tigr="TIGR02170 thyX 211 thymidylate synthase,
flavin-dependent"
/product="FAD-dependent
thymidylate synthase"
/translation="MNEATKRTIVKEIDAILYEEHKVLDHGFIRVVDYMGSDSAIVQA
ARVSYGKGTKQISQDEALIKYLMRHHHTTPFEMCEIKFHVKLPIFVARQWIRHRTANV
NEYSARYSILDNEFYTPKPEQVAKQSDNNKQSGEAFDPDTSKEIIDSLTNSNLVYS
HYEKFIEQGLAREIARTNLMLNYYTQFYWKIDLHNLHFLKLADKHAQYEIRVYAEV
MLDIIKKWVPLAYNAFVEYCLESAISRTGLEIIRKLIKGENVTREESNIGKREWEL
MSILDKQS"
/besthit="qcoverage 100 , hcoverage 100 , similarity 100
, identity 100 , evalue 7.29e-205 , alnlength 284 ,
Bacteria , Proteobacteria , WP_015589436.1 MULTISPECIES:
FAD-dependent thymidylate synthase [Wolbachia]"
gene complement(22912..24189)
/locus_tag="wEsol_00544"
CDS complement(22912..24189)
/locus_tag="wEsol_00544"
/codon_start=1
/transl_table=11
/fullproduct="qcoverage 100 , hcoverage 100 , similarity
100 , identity 100 , evalue 1.86e-301 , alnlength 425 ,
Bacteria , Proteobacteria , WP_006279833.1 MULTISPECIES:
UDP-N-acetylglucosamine 1-carboxyvinyltransferase

```

```

[Wolbachia]"
/cog="MurA COG0766 421 UDP-N-acetylglucosamine
enolpyruvyl transferase"
/pfam="EPSP_synthase"
/tigr="TIGR01072 murA 416 UDP-N-acetylglucosamine
1-carboxyvinyltransferase"
/product="
UDP-N-acetylglucosamine 1-carboxyvinyltransferase"
/translation="MHKILIRNNYKPLVGKIKINGSKNAVLPIMAASLLSSSPVILHN
VPDLIDVHLSKLLLESLGAEVNFMHNKNYKANHTLKIDCSNINNHVMPYKASKLRTS
FLILGPMLSRFGKARTAFPGGCNIGKRPVDMHIKALEEMGAKIEIDGYNIIATVKGKL
QGKEITFEKISVGATENVIMAATFAEGVTTINNAATEPEVLDLIDFLKKMGADIEIDN
TKVIITGVEALNGCVHKIIPDRIEAGTYALAAIITGGKLELEGINLSDIRCITNELET
IGAMVELYDGGIVISRKNGSIKSANVATDPYPNFPSPDMQPOLMSAMCIADGISVIEEN
IFENRFTHADELRLKLGANISIEKSKATISGIKSLSGANLYATDLRSTAALVLASLVAG
GETIINNSHHLWRGYEAMHEKLNSCGADISISS"
/besthit="qcoverage 100 , hcoverage 100 , similarity 100
, identity 100 , evalue 1.86e-301 , alnlength 425 ,
Bacteria , Proteobacteria , WP_006279833.1 MULTISPECIES:
UDP-N-acetylglucosamine 1-carboxyvinyltransferase
[Wolbachia]"
gene complement(24345..25181)
/locus_tag="wEsol_00545"
CDS complement(24345..25181)
/locus_tag="wEsol_00545"
/codon_start=1
/transl_table=11
/fullproduct="qcoverage 100 , hcoverage 100 , similarity
100 , identity 100 , evalue 5.28e-195 , alnlength 278 ,
Bacteria , Proteobacteria , WP_010963091.1 MULTISPECIES:
CPBP family intramembrane metalloprotease [Wolbachia]"
/cog="COG1266 COG1266 226 Predicted metal-dependent
membrane protease"
/pfam="Abi"
/product="CPBP family
intramembrane metalloprotease"
/translation="MGVCMNLTINCTLFVVITYFLTCTIIAWCLPFKDITLLTTFVPA
SVAILLTIYNKQKVRDLFKLSSPKNCLLGFILILVSMLISNGLLSIYCGFSFFRESFT
LDRVKDLASVLSPLVMLFVLLSTFVMWIIMSLGEEIGWRGYLLKNLKSISNFYIRAI
IVGIIWSVWHIPTYVVGASALWKDGFTFTICAYTLYICAMSIMFTWLFEKDNSIWPV
TIAHATNNLVYSVLSILMPSPPLSTFDVIRLTLGAAGYFIVAIGVIWFDKARERHLS
NS"
/besthit="qcoverage 100 , hcoverage 100 , similarity 100
, identity 100 , evalue 5.28e-195 , alnlength 278 ,
Bacteria , Proteobacteria , WP_010963091.1 MULTISPECIES:
CPBP family intramembrane metalloprotease [Wolbachia]"
gene complement(25421..26692)
/locus_tag="wEsol_00546"
CDS complement(25421..26692)
/locus_tag="wEsol_00546"
/codon_start=1
/transl_table=11
/fullproduct="qcoverage 100 , hcoverage 100 , similarity
100 , identity 100 , evalue 8.96e-308 , alnlength 423 ,
Bacteria , Proteobacteria , WP_015589434.1 MULTISPECIES:
beta-ketoacyl-ACP synthase II [unclassified Wolbachia]"
/cog="FabB COG0304 412 3-oxoacyl-(acyl-carrier-protein)
synthase"
/pfam="ketoacyl-synt Thiolase_N Ketoacyl-synt_C"
/tigr="TIGR03150 fabF 407

```

```

beta-ketoacyl-acyl-carrier-protein synthase II"
/product="beta-ketoacyl-ACP
synthase II"
/translation="MSRRVVVTGVGLITPLAADVDNTWLRRLIKGESGIKAINTRFDS
SDLACKIAGQVPLQSDNIEHHFNPLDYISEKDSKRTDRFIHYGIAAAIQAVDDSLILE
SQNINRERVGVTTIGSGIGGLPSIQENVITMQEKGPRRVSPFFVPASLINLISGHISIK
YEFTGPNDSAVTACATGAHAIINSARTIKLGEADVMIAGGAESALCRVGIAGFASMKA
LSTKFNDKPKEASRPWDAERDGFVMGEGAGILVLEEYEHAKKRGAKIYAEELNGYGLTG
DAHHTAPHPEGRGAFKAMQLALHSAQINPNQVGYINAHGTSTPLGDKIEVIAMKKLF
GDYAYKIPVSSTKSSTGHLLGAAGSVEAIFSILALNNGIIPPTLNHLHKPSEGCDLNFV
PFKAQEHKIQYALSNSFGFGGTNASLIFGQV"
/besthit="qcoverage 100 , hcoverage 100 , similarity 100
, identity 100 , evalue 8.96e-308 , alnlength 423 ,
Bacteria , Proteobacteria , WP_015589434.1 MULTISPECIES:
beta-ketoacyl-ACP synthase II [unclassified Wolbachia]"
gene complement(26706..26978)
/locus_tag="wEsol_00547"
CDS complement(26706..26978)
/locus_tag="wEsol_00547"
/codon_start=1
/transl_table=11
/fullproduct="qcoverage 100 , hcoverage 100 , similarity
100 , identity 100 , evalue 8.01e-51 , alnlength 90 ,
Bacteria , Proteobacteria , WP_007549723.1 MULTISPECIES:
acyl carrier protein [Wolbachia]"
/cog="AcpP COG0236 80 Acyl carrier protein"
/pfam="Pfam-B_5835 Pfam-B_10478 PP-binding Pfam-B_17829
Ribosomal_L50"
/tigr="TIGR00517 acyl_carrier 77 acyl carrier protein"
/product="acyl carrier
protein"
/translation="MVRNVNSELAKSTREDIEEKVKKIILEHISKDVEKFNSSSKLSE
HGTDSDLAVEIIMAAEEFGEIIPDEDAQKMETMEQIVEYINNKKG"
/besthit="qcoverage 100 , hcoverage 100 , similarity 100
, identity 100 , evalue 8.01e-51 , alnlength 90 ,
Bacteria , Proteobacteria , WP_007549723.1 MULTISPECIES:
acyl carrier protein [Wolbachia]"
gene 27112..27903
/locus_tag="wEsol_00548"
CDS 27112..27903
/locus_tag="wEsol_00548"
/codon_start=1
/transl_table=11
/fullproduct="qcoverage 100 , hcoverage 100 , similarity
100 , identity 100 , evalue 2.91e-180 , alnlength 263 ,
Bacteria , Proteobacteria , WP_141456688.1 MULTISPECIES:
polyprenyl synthetase family protein [unclassified
Wolbachia]"
/cog="IspA COG0142 322 Geranylgeranyl pyrophosphate
synthase"
/pfam="polyprenyl_synt"
/tigr="TIGR02748 GerC3_HepT 319 heptaprenyl diphosphate
synthase component II"
/product="polyprenyl
synthetase family protein"
/translation="MLDETTKNLLIVEVNKLLPENSENKLISAMRYILLAPAKHIRSF
LVIASSQVFNAEAKKVISVAAAEFVHAYSLIHDDLPCMDNSDTRRSQLSCHKKFDEA
TAVLAGDALLTLAFEVLSSLNEKRCEIIKVLSSQAIGIRGMVGGQALDIDTDFNKIKEI
HLMKTAKLFAASCEIGAIIGGATDEQRRALNYGINLGLIFQAKDDIEDYEQDKTNL
MSVLGKSEVEDYIDGLFKQGLDNLALSGLDNTNYLYDLLNQVKKDG"

```

```

/blasthit="qcoverage 100 , hcoverage 100 , similarity 100
, identity 100 , evalue 2.91e-180 , alnlength 263 ,
Bacteria , Proteobacteria , WP_141456688.1 MULTISPECIES:
polyprenyl synthetase family protein [unclassified
Wolbachia]"
gene 27896..28837
/locus_tag="wEsol_00549"
CDS 27896..28837
/locus_tag="wEsol_00549"
/codon_start=1
/transl_table=11
/pfam="FKBP_C FKBP_C"
/fullproduct="qcoverage 100 , hcoverage 100 , similarity
100 , identity 100 , evalue 1.48e-214 , alnlength 313 ,
Bacteria , Proteobacteria , WP_015589432.1 MULTISPECIES:
FKBP-type peptidyl-prolyl cis-trans isomerase
[unclassified Wolbachia]"
/translation="MVRKIILQMLISVVMILTTLTSAFVFTIVYINKGKPEKKDKLYEI
NATHGGLIQTIAYYLVKPILESALDRYIEKHGLTEYLEEMTQQKEEDSINFYEITEGS
GSKAFCGLEVLQIYKISNNNSATLPSKVSDVTLKIGQDDLKEVSLGAIGMKEGGERV
VTIANENKMNFNFSYYVKLIEVKDKYPDSVNNLMVFNDLINKTGKQVRCGDEISVKYSV
KEHNGEYIVKDQTVQFRVGDKKIPLAIELGVGMRAGNKRTILSPDLLTITDDMLIK
DIDYDEKNISIIDLSLDVKQEVAAHHSTVEKQPKEYS"
/product="FKBP-type
peptidyl-prolyl cis-trans isomerase"
/blasthit="qcoverage 100 , hcoverage 100 , similarity 100
, identity 100 , evalue 1.48e-214 , alnlength 313 ,
Bacteria , Proteobacteria , WP_015589432.1 MULTISPECIES:
FKBP-type peptidyl-prolyl cis-trans isomerase
[unclassified Wolbachia]"
gene complement(28906..30396)
/locus_tag="wEsol_00550"
CDS complement(28906..30396)
/locus_tag="wEsol_00550"
/codon_start=1
/transl_table=11
/fullproduct="qcoverage 100 , hcoverage 100 , similarity
100 , identity 100 , evalue 0.0 , alnlength 496 ,
Bacteria , Proteobacteria , WP_006280200.1 MULTISPECIES:
ATP-dependent protease ATPase subunit HslU [Wolbachia]"
/cog="HslU COG1220 444 ATP-dependent protease HslVU
(ClpYQ), ATPase subunit"
/pfam="MCM AAA_16 Zeta_toxin Sigma54_activat AAA_2 AAA_5
Mg_chelatase AAA AAA_17 AAA_33 AAA_18 AAA_22 AAA_2 AAA
ClpB_D2-small"
/tigr="TIGR00390 hslU 441 ATP-dependent protease HslVU,
ATPase subunit"
/product="ATP-dependent
protease ATPase subunit HslU"
/translation="MSSKQKTLCTNFSNPITLSEGRSCSSDITYDEKDNLYKDTKSGF
DSNDSQVQVNDSTQVLLDDLPPQKIVKELDRFIIGQDDAKRAVAIALRNRWRNQVPF
PLRDEIIPKNILMIGHTGVGKTEIARRLAKLAGAPFIKIEATKFTEIGYVGRDVSII
RDLVDAAIVLVKEKARKALAKKALILAEKTIVNSMVGENATEESKKIFRERLRNKEFE
DGEVSINVRESKSMPLPTFDIPGMPGGQVGVMMNVTEIMGKMFNGSKKTKTITVVKKEAR
EILINEESERLMDEDKIIKEAIDLVSNDGIVFLDEIDKIAARTEVKGEVNREGVQRDL
LPLLEGTTVTTKYGHVKTDYILFIASGAFHQSKPSDLLPELQGRLPFIRVELKALTQED
LIRILKEPESSLLKQYIALMKTENVTLFTDDGIKTIAEIAFTVNRQVENIGARRLHT
VMEKLLDEISFIASEKNSEKFIIDSKYVKDKLESISKQLDLSKFIL"
/blasthit="qcoverage 100 , hcoverage 100 , similarity 100
, identity 100 , evalue 0.0 , alnlength 496 , Bacteria ,

```

Proteobacteria , WP\_006280200.1 MULTISPECIES:  
 ATP-dependent protease ATPase subunit HslU [Wolbachia]"

gene complement(30398..30952)  
 /locus\_tag="wEsol\_00551"

CDS complement(30398..30952)  
 /locus\_tag="wEsol\_00551"  
 /codon\_start=1  
 /transl\_table=11  
 /fullproduct="qcoverage 100 , hcoverage 100 , similarity 100 , identity 100 , evalue 8.00e-123 , alnlength 184 , Bacteria , Proteobacteria , WP\_006280198.1 MULTISPECIES:  
 ATP-dependent protease subunit HslV [Wolbachia]"  
 /cog="HslV COG5405 178 ATP-dependent protease HslVU (ClpYQ), peptidase subunit"  
 /pfam="Proteasome Pfam-B\_18807"  
 /tigr="TIGR03692 ATP\_dep\_HslV 171 ATP-dependent protease HslVU, peptidase subunit"  
 /product="ATP-dependent protease subunit HslV"  
 /translation="MIQHDNNKMYGTTILSIRKDKSVVVIGDGQVSLGHTVIKSGAKK VRRLSGDSVIAGFAGATADAFTLFRLESKLDKHPGQLMRACVELAKDWRMDKYLRKL EAMMIVADKSISLVITGTGDVLEPEDGVAAIGSGGNFALSAARALIDIKGISIEEIAK KAMKIAGDICVYTNHNVVIEKIEE"  
 /besthit="qcoverage 100 , hcoverage 100 , similarity 100 , identity 100 , evalue 8.00e-123 , alnlength 184 , Bacteria , Proteobacteria , WP\_006280198.1 MULTISPECIES:  
 ATP-dependent protease subunit HslV [Wolbachia]"

gene 31068..32228  
 /locus\_tag="wEsol\_00552"

CDS 31068..32228  
 /locus\_tag="wEsol\_00552"  
 /codon\_start=1  
 /transl\_table=11  
 /fullproduct="qcoverage 100 , hcoverage 100 , similarity 100 , identity 100 , evalue 9.13e-280 , alnlength 386 , Bacteria , Proteobacteria , WP\_015589431.1 MULTISPECIES:  
 glutamate--cysteine ligase [unclassified Wolbachia]"  
 /pfam="GshA"  
 /tigr="TIGR02049 gshA\_ferroox 403 glutamate--cysteine ligase"  
 /product="glutamate--cysteine ligase"  
 /translation="MQNIIHPDLEKSINNWF EAKFNGLTSPFYSSIDL RNSGYKIVPV DANLFPAGFNNLSEESRTMAARLIKS YFKRHQYKKVLIIPENYTRNKMYIENVFVIEK ILQLAGFETRIGLLYNEVYNLIEQYETVVKENSLLKTTSGFVPDVII LNRDMTSHIPD TLKDVKQDIVPSPLYGWHSRQKFKYFEIYQELASEFCGEFKIDPWLISVLTESCDGVD FDDDL S LGAVATKVDQILSLVQKKYEEYEIKTQPYVFIKASNGTYGMGIITATSGEEI LNLNKKKRHKMKKIKEGIAINSVIIQEGVPTIDMFKSSSAEPLIYYIGDTPTCYLYRC NSRKDVYSSLNATDCEFH DVSQVVEGKILSLWSIVSKLAVLALAVEIKSFHP"  
 /besthit="qcoverage 100 , hcoverage 100 , similarity 100 , identity 100 , evalue 9.13e-280 , alnlength 386 , Bacteria , Proteobacteria , WP\_015589431.1 MULTISPECIES:  
 glutamate--cysteine ligase [unclassified Wolbachia]"

gene complement(32232..33029)  
 /locus\_tag="wEsol\_00553"

CDS complement(32232..33029)  
 /locus\_tag="wEsol\_00553"  
 /codon\_start=1  
 /transl\_table=11  
 /pfam="DUF3278"

```

/fullproduct="qcoverage 100 , hcoverage 100 , similarity
100 , identity 100 , evaluate 2.60e-184 , alnlength 265 ,
Bacteria , Proteobacteria , WP_006280195.1 MULTISPECIES:
hypothetical protein [Wolbachia]"
/translation="MPNKLKKKSNILAQRVHDIYDHDFRKVICITTGLTALLCKISLQ
FCCEFIDNNRSNIFLIRNVARLVKFPTSILYIAHSAFTLQDLIKDYRNPESKKELAKI
VGKSANLASSTIEALMMLKIIHFCTGSNTDIISYINLTSTILFLFISEPISYYTCKE
YLDNKDPEKSAECKKDLIISTLTLSLGLLNFILRRIETPTIPINLGNIGIYNFNLSVT
VSIIYSAVFLAVQLDKLFQQPVNDPSTELDDVHNINGHSNDSTVEV"
/product="hypothetical protein"
/besthit="qcoverage 100 , hcoverage 100 , similarity 100
, identity 100 , evaluate 2.60e-184 , alnlength 265 ,
Bacteria , Proteobacteria , WP_006280195.1 MULTISPECIES:
hypothetical protein [Wolbachia]"
gene complement(33100..34047)
/locus_tag="wEsol_00554"
CDS complement(33100..34047)
/locus_tag="wEsol_00554"
/codon_start=1
/transl_table=11
/fullproduct="qcoverage 100 , hcoverage 100 , similarity
100 , identity 100 , evaluate 3.43e-230 , alnlength 315 ,
Bacteria , Proteobacteria , WP_010082099.1 MULTISPECIES:
ferrochelatase [Wolbachia]"
/cog="HemH COG0276 320 Protoheme ferro-lyase
(ferrochelatase)"
/pfam="Ferrochelatase"
/tigr="TIGR00109 hemH 322 ferrochelatase"
/product="ferrochelatase"
/translation="MKKAVILFNLGGPDSLNAVVRPFLFNLFYDRRIINLPNPFRLLA
KFISAKRENTARKIYEEIGGKSPILENTKMQANASELKLNNRNHVHKVFICMRYWRP
FADEVIESVKQFDPDEVILLPLYPQYSTTTTLSSIENWQKNAKRYGLKCNTKMIHRY
DNQDFIEAHTNLIKYYKLARKIGKPRVLFSASLSPLSIIKKGDPYASQVERSVELIV
EKLAINNLDWSICYQSKIGPVKWLEPSTESELLRAKADGVPVVLSPISFVSEHSETLV
ELDIEYKAIKDGYYFRVPTLSTDPLFIKCLADLCINLP"
/besthit="qcoverage 100 , hcoverage 100 , similarity 100
, identity 100 , evaluate 3.43e-230 , alnlength 315 ,
Bacteria , Proteobacteria , WP_010082099.1 MULTISPECIES:
ferrochelatase [Wolbachia]"
gene complement(34048..34869)
/locus_tag="wEsol_00555"
CDS complement(34048..34869)
/locus_tag="wEsol_00555"
/codon_start=1
/transl_table=11
/fullproduct="qcoverage 100 , hcoverage 100 , similarity
100 , identity 100 , evaluate 6.56e-182 , alnlength 273 ,
Bacteria , Proteobacteria , WP_015589429.1 MULTISPECIES:
hypothetical protein [unclassified Wolbachia]"
/translation="MGECKNNTTKQAEPTTKKQAKSTTKKLVSNFKSSLFCGTKGFL
TFNLAFLSFLEYSLLHNTLKKGAAFAMKRNTIPFLEMAIIVPFVCFALPAMLGSM
MQCALLCASLMIATCFIVRTFHLREKLMEKITNHSRKEIDAEFKKDTIKFPIFDQNRK
HTEYNPSNSGRLLDETSSTSLFVKVLLFPLKVLLNVLQSCIMLSLAAVELLETVP
SLFVDTFFDWNFTSTKSNLKRSGHLLYASVRNLVPITKFDECVANFIGTPEVTCCSSA"
/product="hypothetical protein"
/besthit="qcoverage 100 , hcoverage 100 , similarity 100
, identity 100 , evaluate 6.56e-182 , alnlength 273 ,
Bacteria , Proteobacteria , WP_015589429.1 MULTISPECIES:
hypothetical protein [unclassified Wolbachia]"
gene 34983..35402

```

CDS  
 /locus\_tag="wEsol\_00556"  
 34983..35402  
 /locus\_tag="wEsol\_00556"  
 /codon\_start=1  
 /transl\_table=11  
 /fullproduct="qcoverage 100 , hcoverage 100 , similarity 100 , identity 100 , evalue 5.71e-92 , alnlength 139 , Bacteria , Proteobacteria , WP\_015589428.1 MULTISPECIES: nucleoside-diphosphate kinase [Wolbachia]"  
 /cog="Ndk COG0105 135 Nucleoside diphosphate kinase"  
 /pfam="NDK"  
 /product="nucleoside-diphosphate kinase"  
 /translation="MAIEKTLKILKPDVKNNTGNINSYIEQSGLKITAQKMMLLTKKQAEIFYEIHKDRPFFGELVEFMTSGSVVQVLVGENAVSKYRQIMGATDPKQADKGTIRGDFADDISENRVHGSDSLENARKEIAFFFAECELV"  
 /besthit="qcoverage 100 , hcoverage 100 , similarity 100 , identity 100 , evalue 5.71e-92 , alnlength 139 , Bacteria , Proteobacteria , WP\_015589428.1 MULTISPECIES: nucleoside-diphosphate kinase [Wolbachia]"

gene  
 complement(35714..35890)

CDS  
 /locus\_tag="wEsol\_00557"  
 complement(35714..35890)  
 /locus\_tag="wEsol\_00557"  
 /codon\_start=1  
 /transl\_table=11  
 /fullproduct="qcoverage 100 , hcoverage 100 , similarity 100 , identity 100 , evalue 4.12e-32 , alnlength 58 , Bacteria , Proteobacteria , WP\_182309489.1 hypothetical protein [Wolbachia pipientis]"  
 /translation="MKKKAKETLGLLSALKYWRFLCFKRLTSEIQPLLIATNLRCKCLRNLRSRKKDKESPS"  
 /product="hypothetical protein"  
 /besthit="qcoverage 100 , hcoverage 100 , similarity 100 , identity 100 , evalue 4.12e-32 , alnlength 58 , Bacteria , Proteobacteria , WP\_182309489.1 hypothetical protein [Wolbachia pipientis]"

gene  
 36383..36988

CDS  
 /locus\_tag="wEsol\_00558"  
 36383..36988  
 /locus\_tag="wEsol\_00558"  
 /codon\_start=1  
 /transl\_table=11  
 /fullproduct="qcoverage 100 , hcoverage 100 , similarity 100 , identity 100 , evalue 3.33e-137 , alnlength 201 , Bacteria , Proteobacteria , WP\_010963080.1 MULTISPECIES: recombination mediator RecR [Wolbachia]"  
 /cog="RecR COG0353 198 Recombinational DNA repair protein (RecF pathway)"  
 /pfam="RecR Toprim\_4 Toprim"  
 /tigr="TIGR00615 recR 196 recombination protein RecR"  
 /product="recombination mediator RecR"  
 /translation="MNVNIKNLVHAFSKLPSLGPSSSRRLVIHLLQNKEKVMLPLASLIKELADLIIECEVCGNLDTKSPCSICTNPKRDTKLLCVVEELGDLWAFEKGNIYSGLYHVLGGRLSAINGIGPKELNLDITLKRVTESKIEEIIIIAINPTLEGQVTAQYIIELLKNLDVKISRLACGIPMGGEIDYLDDEGTLRIALTSRQEYELNIK"  
 /besthit="qcoverage 100 , hcoverage 100 , similarity 100 , identity 100 , evalue 3.33e-137 , alnlength 201 , Bacteria , Proteobacteria , WP\_010963080.1 MULTISPECIES:

```

gene      recombination mediator RecR [Wolbachia]"
          36992..38212
          /locus_tag="wEsol_00559"
CDS       36992..38212
          /locus_tag="wEsol_00559"
          /codon_start=1
          /transl_table=11
          /pfam="KAP_NTPase AAA_22"
          /fullproduct="qcoverage 100 , hcoverage 100 , similarity
          100 , identity 100 , evalue 4.75e-283 , alnlength 406 ,
          Bacteria , Proteobacteria , WP_015589427.1 MULTISPECIES:
          hypothetical protein [Wolbachia]"
          /translation="MCLKKLISLITFKKKEIAPPLKVVAWENDRLNYKQFSGKFNNII
          KTIDQSFTIISLEGYDGGWKTFFLKEWVKELKQQNEIAAYSAWDINALDQPLPSFLN
          FLFEDLFVSYKVKRSVIQQFKNINQELFSLNTLGKLISKSPAMLVSFLDAAKEADKK
          DIGFVLSELSSLQRRKESTRDFKTQLADVVNKIRKDKNIYIMVDNLDVCRPKFVVDLF
          ESIKYMLDVEGLVFIIPVSKDKSNVQRAISTILGPNFDLKSFTDLSLHLPKQPIEKFT
          KELFENIKLPKKSKNLIVDSFIFYAESLSLSLKTIEYCVKKIKLCLLNHTREELPDPN
          LFSFLVILQSINIDIYEELGFSYQRALEKIENEYKSLVLNGQEEWEKLTSLTAFAE
          RESKINKAIKDILF"
          /product="hypothetical protein"
          /besthit="qcoverage 100 , hcoverage 100 , similarity 100
          , identity 100 , evalue 4.75e-283 , alnlength 406 ,
          Bacteria , Proteobacteria , WP_015589427.1 MULTISPECIES:
          hypothetical protein [Wolbachia]"
gene      complement(38258..39082)
          /locus_tag="wEsol_00560"
CDS       complement(38258..39082)
          /locus_tag="wEsol_00560"
          /codon_start=1
          /transl_table=11
          /fullproduct="qcoverage 100 , hcoverage 100 , similarity
          100 , identity 100 , evalue 1.71e-173 , alnlength 274 ,
          Bacteria , Proteobacteria , WP_015589426.1 MULTISPECIES:
          hypothetical protein [unclassified Wolbachia]"
          /translation="MNTTVEKNNPKIFPQNEGKINSKGMVAPPVPPKSSQAKFAGIKA
          IFERNVPHSQANDSNETVSSNLGRTFGPTMQKLMEDNIHSTPNKQRRNSGDSGISDIS
          SSTSDDEDRTIKDKMMENVKQDNHQKSFDLHKVQATDELETVKFLKTLSSKEREKLG
          SPKQQNNQKVETSKKTYNPLDWNPIYQGKKLFSGLNMSSNSSSCSEKSNISDVSDKSN
          NSNIVRCNITRSNSKEDLRKPDASHNDKSAGKKLSNVNVSELIRKFEQGNDIVKGR"
          /product="hypothetical protein"
          /besthit="qcoverage 100 , hcoverage 100 , similarity 100
          , identity 100 , evalue 1.71e-173 , alnlength 274 ,
          Bacteria , Proteobacteria , WP_015589426.1 MULTISPECIES:
          hypothetical protein [unclassified Wolbachia]"
gene      complement(39152..40480)
          /locus_tag="wEsol_00561"
CDS       complement(39152..40480)
          /locus_tag="wEsol_00561"
          /codon_start=1
          /transl_table=11
          /fullproduct="qcoverage 100 , hcoverage 100 , similarity
          100 , identity 100 , evalue 3.26e-306 , alnlength 442 ,
          Bacteria , Proteobacteria , WP_141456686.1 MULTISPECIES:
          pyruvate dehydrogenase complex dihydrolipoamide
          acetyltransferase [unclassified Wolbachia]"
          /cog="AceF COG0508 404 Pyruvate/2-oxoglutarate
          dehydrogenase complex, dihydrolipoamide acyltransferase
          (E2) component, and related enzymes"
          /pfam="Biotin_lipoyl Biotin_lipoyl_2 E3_binding

```

```

2-oxoacid_dh"
/tigr="TIGR01349 PDHac_trf_mito 437 pyruvate
dehydrogenase complex dihydrolipoamide acetyltransferase"
/product="pyruvate
dehydrogenase complex dihydrolipoamide acetyltransferase"
/translation="MPIEILMPALSPTMSKTGGKIVKWHKKEQDKVEVGDVIAEIETD
KAIMEFESVDEGVVAKILVTEGTSGVPVNQPIALMLEEGEDENALNNYTSTSINSAVK
KEVTKCAVDNQKSEHQDLNGKPISHSSVSFQRTLESNLSMSSQCLTLGSRKEEDTKT
TEGRIKISPLAKKIAQNEGVNVQQLKGTGPYGRIIKADVLEFLGSGIHTE SPEIVEVS
NIRQVIAQRLTESKQNVPHFYLTVDCCQVDKLISLKNEINSADENNKVTINDLIKAVA
FSMCKKFPDINSSWIDNKILKYSNVDISIAVALEDGLITPIVKNADKKGILSISKEVKD
LVSRRARGKLKPEEFQGGGFTISNLGMFGIKAFSAIINPPQSCIMAVGASKKQPIVMN
EKIETAEIMTVTSLVDHRAVDGALGAKFLNAFKHYIENPLVMLIETAVIY"
/besthit="qcoverage 100 , hcoverage 100 , similarity 100
, identity 100 , evalue 3.26e-306 , alnlength 442 ,
Bacteria , Proteobacteria , WP_141456686.1 MULTISPECIES:
pyruvate dehydrogenase complex dihydrolipoamide
acetyltransferase [unclassified Wolbachia]"
gene 40551..41042
/locus_tag="wEsol_00562"
CDS 40551..41042
/locus_tag="wEsol_00562"
/codon_start=1
/transl_table=11
/fullproduct="qcoverage 100 , hcoverage 100 , similarity
100 , identity 100 , evalue 8.31e-117 , alnlength 163 ,
Bacteria , Proteobacteria , WP_015589424.1 MULTISPECIES:
hypothetical protein [unclassified Wolbachia]"
/cog="COG3807 COG3807 171 Uncharacterized protein
conserved in bacteria"
/pfam="Pfam-B_9058 SH3_4 SH3_4 SH3_3"
/product="hypothetical protein"
/translation="MMNKSVTLSLTLSQCVTLGSWFSTIILLFLLFSHSLFANNFVST
KSNKINMRTGPGFHYVPKWIYTCKNLPLKVIEEFESWKKVCDIDEDCGWIKGNLLSDK
RYAIVKEDTYGYQKQSVDSKITIKIDKFVVMKIEKCNEEWCFLSTPKRKAWVQKKHIY
GVD"
/besthit="qcoverage 100 , hcoverage 100 , similarity 100
, identity 100 , evalue 8.31e-117 , alnlength 163 ,
Bacteria , Proteobacteria , WP_015589424.1 MULTISPECIES:
hypothetical protein [unclassified Wolbachia]"
gene complement(41097..41534)
/locus_tag="wEsol_00563"
CDS complement(41097..41534)
/locus_tag="wEsol_00563"
/codon_start=1
/transl_table=11
/fullproduct="qcoverage 100 , hcoverage 100 , similarity
99.3 , identity 99.3 , evalue 1.27e-91 , alnlength 145 ,
Bacteria , Proteobacteria , WP_015589423.1 hypothetical
protein [Wolbachia endosymbiont of Drosophila simulans]"
/translation="MSLKNKISELIEQQFSIKYHDNYLAYAIHKWAASEISNSIAFCI
IGCGNCKIGYQDAANSFNITKEEIEQGNIASIESKIKSEAEKSGSEFSELSIRVDQSL
REQSEKSIVQILDSSAEEMLRSFCDSPVQSPEHEEVSAIILCFT"
/product="hypothetical protein"
/besthit="qcoverage 100 , hcoverage 100 , similarity 99.3
, identity 99.3 , evalue 1.27e-91 , alnlength 145 ,
Bacteria , Proteobacteria , WP_015589423.1 hypothetical
protein [Wolbachia endosymbiont of Drosophila simulans]"
gene complement(41656..44463)
/locus_tag="wEsol_00564"

```

```

CDS      complement(41656..44463)
          /locus_tag="wEsol_00564"
          /codon_start=1
          /transl_table=11
          /pfam="Pfam-B_6118"
          /fullproduct="qcoverage 99.2513368983957 , hcoverage 100
, similarity 99.8 , identity 99.8 , evaluate 0.0 ,
alnlength 928 , Bacteria , Proteobacteria ,
WP_174516895.1 hypothetical protein [Wolbachia
endosymbiont of Cardiocondyla obscurior]"
          /translation="MSGYRYFMRSVRLNLFLLIFFLILGLSYQGYADCPTFVESNTWLE
AIVGGDWVKEIKVQAIKDQGVDFYFNPKIRVCAYDGGQSYCYDLQSGESCRQIYGTQGT
GAGVSAAAFIDWEGDKTKAGGEIARGLKWEWADGVTDEEKRRFANSPKICACSQKGAC
MSGISSWGSRVFSGENIFRPGEMEKVCDTCYQTAVKCAPVPLAPSPPPFCEQLAMSP
QVRIVPITNEDNDYFDPRVGVIISGLEERKELGFPHVVSNNENIPNHSYTVTDKDTHTY
YFKTYRKKGQLCAEYLGTSINEQNPFVRCFPAPPAPPEPEIVEIVNKNLTKVEMKMS
ESTCAKAHGTYSNGSCTFNVNTDLNHPINIGPLSLKVVKPAIVAKTTDSNIDNIIIEGI
LESNPQQFKVLKEYGYVPDVQIKCSKGGSFYSFNDFEKKLKDKSIOCFNNSGQPEIE
VKYKGNNSKMLCLSGWQPEPEEFVLKRENKIIPLKLMGTRYTKYNAVYSKESNQFY
LPSKENKRADLLNRDQSELDKIIIFNKQGYVFFPDENEQKKRECSYCVKRNDIEDDTFK
SSKGLKVYKLTDEHREKCNQGGDGCICFTGTCSRSTRYVDKENTQPFYTKISQNTN
GVVTQQEAPIKANRTEVFYADKLCRFDLGLEKLKEIIIEKQLEKEKQEPEKKSEKSH
VFGSGDYDVGDSQITSSRVEIEVWGCGEAGHIKDTPTYTTPNSTESRVGMPGDYIKAE
LEIDLDPYIINIKVEQGGGNREKEYTDKDGGPFIKRCRLGKQECKYLITMGGGGIYK
IYEEKDYTEPIIDDSVKLKEKTTTTGLRVTEDNKIIYIENGEIKHETVKCSKGFSSK
PGAGGCIDKSKRIYGKGSAGQVKVTPIIKGFDINIINDAIEKMIGNRYDPGEVRDFSR
SEFDTSITKMIIEELKELLR"
          /product="hypothetical protein"
          /besthit="qcoverage 99.2513368983957 , hcoverage 100 ,
similarity 99.8 , identity 99.8 , evaluate 0.0 , alnlength
928 , Bacteria , Proteobacteria , WP_174516895.1
hypothetical protein [Wolbachia endosymbiont of
Cardiocondyla obscurior]"
gene      complement(44423..46777)
          /locus_tag="wEsol_00565"
CDS      complement(44423..46777)
          /locus_tag="wEsol_00565"
          /codon_start=1
          /transl_table=11
          /fullproduct="qcoverage 100 , hcoverage 100 , similarity
100 , identity 100 , evaluate 0.0 , alnlength 784 ,
Bacteria , Proteobacteria , WP_141456684.1 MULTISPECIES:
type VI secretion protein [unclassified Wolbachia]"
          /cog="VirB4 COG3451 796 Type IV secretory pathway, VirB4
components"
          /pfam="CagE_TrpE_VirB_TrwB_AAD_bind AAA_10"
          /tigr="TIGR00929_VirB4_CagE_792_type_IV
secretion/conjugal transfer ATPase, VirB4 family"
          /product="type VI secretion
protein"
          /translation="MQLKVPTVNSKLKKKNNLALLESIDLDFVPYACHYDEETILTKQ
GELLKIIKLEDYSSVDNYSDLRTEIRKSISKNNINSLCFTVWIHTVRKRNLKSLKWNKT
EDFSDNLHSTWFNKLTDSKLQYINELYIVILFSDFGKHTNNSFFFNRIKNKHLKSLQE
SHQELQKITDVIQNDLGPFGAKKLSLRFSEGKIYSEMIEFLHYIVTLTHKDYPIHERD
LSQYIRNFKIAFGFNTFQTIFENQQKFGSIFSISKEYREISLGNIDRCLQLESEFIITE
IMIFTSNNKAIKEFKKQINMLQISEDNTLLKSSGIEEIIIELEKTSSIDFCQKIIIFTI
FADDRNKLAESISDLSSIMSLVGFMFRTDLHMESHFWAQLPGNFASFITQPKNILT KY
ACSFAMLHDFTSGLTKGRRWKEAVMIFFSKKGNPYFFNFHKGKRNNGHTTILGAPNSGR
TSLINFLLSERKFNPRIVILDNTGKSIIFTKAVSGKYIIDPKYKDKSLKFNPLNIE
DSASNRNMLVELIRRMVADTSLVDVEEKIRKIVDSIFAIPKESRSISQISEVLLLLGG

```

```

KISRWCDDGDFAYLFQDGNESDIDWETKIISLNTANLTKQKECMSVILYYFLYSFEAK
CDGSPAILVLDEAWEISNIFPTEKEFDNWMQRMTELNVVVILSTENLNLAFAKFTQY
LDKHVDTRILMPNVNANRLYMKAFLSKEELNIILQTPTQEGFLIKQYKGLVTLNLD
LKNMQEIHVLSANKETIKYMYEAIKEKGEEVNEWLPVFYEKCKA"
/blasthit="qcoverage 100 , hcoverage 100 , similarity 100
, identity 100 , evalue 0.0 , alnlength 784 , Bacteria ,
Proteobacteria , WP_141456684.1 MULTISPECIES: type VI
secretion protein [unclassified Wolbachia]"
gene complement(46822..47196)
/locus_tag="wEsol_00566"
CDS complement(46822..47196)
/locus_tag="wEsol_00566"
/codon_start=1
/transl_table=11
/pfam="MMPL"
/fullproduct="qcoverage 100 , hcoverage 100 , similarity
100 , identity 100 , evalue 1.03e-71 , alnlength 124 ,
Bacteria , Proteobacteria , WP_022626145.1 MULTISPECIES:
hypothetical protein [Wolbachia]"
/translation="MRIQLNKVLVFIALLSFIFASYSSEASSASDELKGIQETVKNFI
SSFSVKDTVENMSPSTIIIGLCIAAVILAVVFRGLIFFMIMFGVLVLMFGSTEKATDYL
KEKFNFADIKLQSDSEKKDKN"
/product="hypothetical protein"
/blasthit="qcoverage 100 , hcoverage 100 , similarity 100
, identity 100 , evalue 1.03e-71 , alnlength 124 ,
Bacteria , Proteobacteria , WP_022626145.1 MULTISPECIES:
hypothetical protein [Wolbachia]"
gene complement(47291..48514)
/locus_tag="wEsol_00567"
CDS complement(47291..48514)
/locus_tag="wEsol_00567"
/codon_start=1
/transl_table=11
/pfam="Pfam-B_1673 DUF3534"
/fullproduct="qcoverage 100 , hcoverage 100 , similarity
100 , identity 100 , evalue 2.62e-230 , alnlength 407 ,
Bacteria , Proteobacteria , WP_015589419.1 MULTISPECIES:
hypothetical protein [unclassified Wolbachia]"
/translation="MLSSKKDINQQLHDTIYKKVTKENHKYKSPQKGDGTIKKCIELF
KEGASPEVLTELEKSLREQLKSPEKQEEYQKHYKYYIENFLPALKDEVIKSEELAVP
TVFNNEREQSQRPQTIRGKIVKTILDITNRSSSVSSIPNAVEENIEDQMQLKHIEEQN
NTQETPLNVAEKKSGDNKILSNSDVAEEVFEEKYSKVVKIEEKKTSKLSSGNDSDSGI
DSPRTSKESLKSPPVSSRRSSLTLVTSTSSSEESLNSTLSSVEGDNGLQPEGGEKTELLE
SNLESPKENETQVQPEQTVKKEPKMQENENSQGANPDQVKKDILLKNQPNRNLHVA
LVAGCALSTIGCIVAGAMTSGLLIGAGLLAMVAVLAIAVAELHSNFLSSSKLTSINVSP
LVDDKSLQHVHSGKN"
/product="hypothetical protein"
/blasthit="qcoverage 100 , hcoverage 100 , similarity 100
, identity 100 , evalue 2.62e-230 , alnlength 407 ,
Bacteria , Proteobacteria , WP_015589419.1 MULTISPECIES:
hypothetical protein [unclassified Wolbachia]"
gene complement(48637..49665)
/locus_tag="wEsol_00568"
CDS complement(48637..49665)
/locus_tag="wEsol_00568"
/codon_start=1
/transl_table=11
/fullproduct="qcoverage 100 , hcoverage 100 , similarity
100 , identity 100 , evalue 6.00e-240 , alnlength 342 ,
Bacteria , Proteobacteria , WP_015589418.1 MULTISPECIES:

```

```

nitronate monooxygenase [unclassified Wolbachia]"
/cog="COG2070 COG2070 336 Dioxygenases related to
2-nitropropane dioxygenase"
/pfam="NMO ThiG His_biosynth FMN_dh DHO_dh IMPDH"
/tigr="TIGR03151 enACPred_II 307 putative
enoyl-[acyl-carrier-protein] reductase II"
/product="nitronate
monooxygenase"
/translation="MLSSLWKKGTDFLGSEFAIMGAMSWVSEARNLVSAISNAGGFGV
IACGAMFPDLLEKEIIETQKLTKNPFVGNLITMHPKLSELIDVCIETKVSHIVLAGGL
PTKPNIEKIKGAGIKVMCFAPALSLAKRLVKMGVDALIEGMEAGGHIGPVSTSVLAQ
EILPHFKNEQIPVVFVAGGIGRGEVIVNYLEMGASGCQIGTLFVCTNESIAHKNFKEVF
IKSAARNAIPSVQISADFPVIPVRAIANKASDDFMKRQKEVIDEYQKGQISKEDGQLE
IEKFWAGALRRAVIDGDVETGSLMAGQSVGMVDREKPVKEVVNMLVQQAKNHINSKSV
EVESPESEK"
/besthit="qcoverage 100 , hcoverage 100 , similarity 100
, identity 100 , evalue 6.00e-240 , alnlength 342 ,
Bacteria , Proteobacteria , WP_015589418.1 MULTISPECIES:
nitronate monooxygenase [unclassified Wolbachia]"
gene complement(49671..50192)
/locus_tag="wEsol_00569"
CDS complement(49671..50192)
/locus_tag="wEsol_00569"
/codon_start=1
/transl_table=11
/fullproduct="qcoverage 100 , hcoverage 100 , similarity
100 , identity 100 , evalue 5.30e-118 , alnlength 173 ,
Bacteria , Proteobacteria , WP_015589417.1 MULTISPECIES:
cytochrome b [unclassified Wolbachia]"
/cog="CybB COG3038 181 Cytochrome B561"
/pfam="Cytochrom_B_N Ni_hydr_CYTB Cytochrom_B561 DUF4405"
/product="cytochrome b"
/translation="MEDNKYSLGLRVIHWLMAVFIIGMLCSGLYMKSLPLSNEIKFNI
YAIHKACGITILGLIIVRIFFRVFTYVPPPLPANFSRFVINISKAVHFGLYSLMVLMLPL
SGYVMSSASGKQIKYFFHIPLLINQNKDLANTANELHSMLAYFMVLFIIILHILGALKH
TFIDKQNIKFKMI"
/besthit="qcoverage 100 , hcoverage 100 , similarity 100
, identity 100 , evalue 5.30e-118 , alnlength 173 ,
Bacteria , Proteobacteria , WP_015589417.1 MULTISPECIES:
cytochrome b [unclassified Wolbachia]"
gene complement(50607..50783)
/locus_tag="wEsol_00570"
CDS complement(50607..50783)
/locus_tag="wEsol_00570"
/codon_start=1
/transl_table=11
/fullproduct="qcoverage 100 , hcoverage 100 , similarity
100 , identity 100 , evalue 3.40e-31 , alnlength 58 ,
Bacteria , Proteobacteria , WP_215401836.1 hypothetical
protein [Wolbachia endosymbiont of Drosophila simulans]"
/translation="MKKKAKEALRLLSALKYWRFLCFKRLTSEIQPLLIATNLRCKCL
RNLLSRKKDKESPS"
/product="hypothetical protein"
/besthit="qcoverage 100 , hcoverage 100 , similarity 100
, identity 100 , evalue 3.40e-31 , alnlength 58 ,
Bacteria , Proteobacteria , WP_215401836.1 hypothetical
protein [Wolbachia endosymbiont of Drosophila simulans]"
gene 51492..52688
/locus_tag="wEsol_00571"
CDS 51492..52688

```

```

/locus_tag="wEsol_00571"
/codon_start=1
/transl_table=11
/fullproduct="qcoverage 100 , hcoverage 100 , similarity
100 , identity 100 , evalue 5.73e-280 , alnlength 398 ,
Bacteria , Proteobacteria , WP_015589416.1 MULTISPECIES:
phosphoglycerate kinase [unclassified Wolbachia]"
/cog="Pgk COG0126 395 3-phosphoglycerate kinase"
/pfam="PGK"
/product="phosphoglycerate
kinase"
/translation="MSIPSIENCDLHNKAVLLRVDFNVPIKDGEIRDVTRILRALPTI
QYLVNASAKIIIIISHFGRPKARDNNLSLKNVIDTLSQLLNKKVKFIDDCFGEKVQRAV
SVMDAGDIILLENLRFYKEEQSDSNFAKQLASLADIYVNDASFCSHRAHASISRITE
FLPSYAGFCLQDELKYLEKAVSFKA KPITAIVGGAKISTKIKVLMKLTEKVDYLVGG
AIANNFLSFSKVNIGKSFFQNGVDDLLHNIVETANKNNCKIVVPEDVLVAVNSDYSTS
ISRRTESILDGDIILDIGPQTLSTISSIIASSKTLLWNGPIGVFEHSAFASGTIGVMK
IVSDLTHKGKLTISIIGGDSLISAAGLTDKDFTYVSTGGGAFLDWLSGDEMPGVAA
LQKRLD"
/besthit="qcoverage 100 , hcoverage 100 , similarity 100
, identity 100 , evalue 5.73e-280 , alnlength 398 ,
Bacteria , Proteobacteria , WP_015589416.1 MULTISPECIES:
phosphoglycerate kinase [unclassified Wolbachia]"
gene 52738..53025
/locus_tag="wEsol_00572"
CDS 52738..53025
/locus_tag="wEsol_00572"
/codon_start=1
/transl_table=11
/fullproduct="qcoverage 100 , hcoverage 100 , similarity
100 , identity 100 , evalue 6.10e-64 , alnlength 95 ,
Bacteria;Eukaryota , Proteobacteria;Arthropoda ,
WP_012673373.1 MULTISPECIES: hypothetical protein
[Wolbachia]"
/translation="MSKTVKLILCLIIPIIGFIFYIKDHYFHTGYVEENVEVNFEPPF
SSQPATVSELTD FDRGVLKVC GDWGAHPDKEDFKILLSCPQH QE VVKGIYK"
/product="hypothetical protein"
/besthit="qcoverage 100 , hcoverage 100 , similarity 100
, identity 100 , evalue 6.10e-64 , alnlength 95 ,
Bacteria;Eukaryota , Proteobacteria;Arthropoda ,
WP_012673373.1 MULTISPECIES: hypothetical protein
[Wolbachia]"
gene 53022..53366
/locus_tag="wEsol_00573"
CDS 53022..53366
/locus_tag="wEsol_00573"
/codon_start=1
/transl_table=11
/pfam="XendoU EndoU_bacteria"
/fullproduct="qcoverage 100 , hcoverage 100 , similarity
100 , identity 100 , evalue 5.31e-85 , alnlength 114 ,
Bacteria , Proteobacteria , WP_227738569.1 EndoU
domain-containing protein [Wolbachia endosymbiont of
Drosophila simulans]"
/translation="MITPDADLELLKDELANIWFTNSESEKETIGFGHIFCGEPNDKL
GGMHFVGRYVEAQEDKWAGAIWNDSKSLCNKSDIKPPVYTFGMKYL GKDGEVKVKCPNG
YAYNLHADNFCN"
/product="EndoU domain-containing protein"
/besthit="qcoverage 100 , hcoverage 100 , similarity 100
, identity 100 , evalue 5.31e-85 , alnlength 114 ,

```

```

Bacteria , Proteobacteria , WP_227738569.1 EndoU
domain-containing protein [Wolbachia endosymbiont of
Drosophila simulans]"
gene      53323..53532
          /locus_tag="wEsol_00574"
CDS       53323..53532
          /locus_tag="wEsol_00574"
          /codon_start=1
          /transl_table=11
          /fullproduct="qcoverage 100 , hcoverage 93.2432432432432
, similarity 100 , identity 100 , evalue 1.85e-45 ,
alnlength 69 , Bacteria , Proteobacteria , KDB19218.1
hypothetical protein wGmm_0106 [Wolbachia endosymbiont of
Glossina morsitans morsitans]"
          /translation="MDTHITFMPIISATKVFKELGKDGMClyEMEDDDYQSVFVRKND
AILTFYPDLTPKCDDKSTYCSCGKS"
          /product="hypothetical protein"
          /besthit="qcoverage 100 , hcoverage 93.2432432432432 ,
similarity 100 , identity 100 , evalue 1.85e-45 ,
alnlength 69 , Bacteria , Proteobacteria , KDB19218.1
hypothetical protein wGmm_0106 [Wolbachia endosymbiont of
Glossina morsitans morsitans]"
gene      53630..53980
          /locus_tag="wEsol_00575"
CDS       53630..53980
          /locus_tag="wEsol_00575"
          /codon_start=1
          /transl_table=11
          /fullproduct="qcoverage 100 , hcoverage 100 , similarity
100 , identity 100 , evalue 5.09e-66 , alnlength 116 ,
Bacteria , Proteobacteria , WP_007549043.1 MULTISPECIES:
diacylglycerol kinase [Wolbachia]"
          /cog="DgkA COG0818 123 Diacylglycerol kinase"
          /pfam="DAGK_prokar"
          /product="diacylglycerol
kinase"
          /translation="MKKGIIRLIKAIQYSCEGIKSAFISEIAFRQELLLFIVCVSILF
VLDVSNLERAVMISSLFLVLIVEIVNTAFETTIERISSEQHILSKVKVDLGSAAVFLS
LINFLITWMIILIG"
          /besthit="qcoverage 100 , hcoverage 100 , similarity 100
, identity 100 , evalue 5.09e-66 , alnlength 116 ,
Bacteria , Proteobacteria , WP_007549043.1 MULTISPECIES:
diacylglycerol kinase [Wolbachia]"
gene      complement(53992..54804)
          /locus_tag="wEsol_00576"
CDS       complement(53992..54804)
          /locus_tag="wEsol_00576"
          /codon_start=1
          /transl_table=11
          /fullproduct="qcoverage 100 , hcoverage 100 , similarity
100 , identity 100 , evalue 1.84e-191 , alnlength 270 ,
Bacteria , Proteobacteria , AGK00383.1 Pseudouridine
synthase [Wolbachia endosymbiont of Drosophila simulans
wHa]"
          /cog="RluA COG0564 289 Pseudouridylate synthases, 23S
RNA-specific"
          /pfam="PseudoU_synth_2 Pfam-B_415"
          /tigr="TIGR00005 rluA_subfam_298 pseudouridine synthase,
RluA family"
          /product="Pseudouridine synthase"

```

```

/translation="MKLLGIPINNDHIVKPGEEYIVHLVQPDISTSIEPNYDIKLDI
VYEDEDIIVLSKQSGTLTVHPGAGTNNDTLLNAVIAHLNVRPGIVHRLDKDTSGLMVIA
KNEAAHSFLSELLSNRKIKREYLAVVWGTLSQQGTIKTNIAPKRGNKEMMCVTKITG
KLAITHYLVQKVIGQVSLVKCTLETGRTHQIRVHMSHIGHISIVGDQVYGKNSSKSTKY
AKNSSFIRNFNRQALHAYTLGLYHPKSKGYMEFVSDLPQDIKTLIGFDNIS"
/besthit="qcoverage 100 , hcoverage 100 , similarity 100
, identity 100 , evalue 1.84e-191 , alnlength 270 ,
Bacteria , Proteobacteria , AGK00383.1 Pseudouridine
synthase [Wolbachia endosymbiont of Drosophila simulans
wHa]"
gene complement(54927..56630)
/locus_tag="wEsol_00577"
CDS complement(54927..56630)
/locus_tag="wEsol_00577"
/codon_start=1
/transl_table=11
/fullproduct="qcoverage 98.7654320987654 , hcoverage
99.1150442477876 , similarity 100 , identity 99.8 ,
evalue 0.0 , alnlength 560 , Bacteria , Proteobacteria ,
WP_141456661.1 MULTISPECIES: hypothetical protein
[unclassified Wolbachia]"
/translation="MLWLQTLKDPFKDYFDLGFRLSDQPSRILSSIRKYSGTISIA
STIATLIAFTAFSIQPVTVSIAGFAFTPAPLAFIPLIVLLFTAVINFINTQKIKENEI
DKKVGNYQVDEQYSQIVQEAKEIEIVTNLDKKGEKLSIVLPISKTQREILEDIEAENR
NRILLFTGSYVFGTIIVVSAISQSINAPIILIALLVAILLCIISTLSNLISNSVDHEN
HTIRKHSSLGLFPYWSGKGMIVSVVENKLGKRENELISLMKKLLSPLCNSFDSNLKK
ACDLLDNSLLKPANINIKETLDHLKKIREDIKKDLDDLWLAIEISEVLNNTKELTKKAHS
LDIEGTFSRLENAIKIAEDKIERFEPSPRFVGLQSTTQSNNNEFLSMLKKLKEDTEKE
KTELKKQLNVVRNELEEIKKKQAQPSTPDLEANNGNNTNKKLLVLENKVKELRDTVRLK
ELEAEQNKLQQKKEKLEQKKSEQEKTDEWKEKINGKPSDFLYYLLESIKLEEKDNKEK
KVEATLRDFDNKVTIYWKDGSQTICHIKKQGDQLQIESSATMFTDPNVQAAWEMARGKS
L"
/product="hypothetical protein"
/besthit="qcoverage 98.7654320987654 , hcoverage
99.1150442477876 , similarity 100 , identity 99.8 ,
evalue 0.0 , alnlength 560 , Bacteria , Proteobacteria ,
WP_141456661.1 MULTISPECIES: hypothetical protein
[unclassified Wolbachia]"
gene complement(56805..58949)
/locus_tag="wEsol_00578"
CDS complement(56805..58949)
/locus_tag="wEsol_00578"
/codon_start=1
/transl_table=11
/fullproduct="qcoverage 99.0196078431373 , hcoverage
96.9821673525377 , similarity 98.6 , identity 97.6 ,
evalue 0.0 , alnlength 707 , Bacteria , Proteobacteria ,
EAL59121.1 ComEC/Rec2 family protein [Wolbachia
endosymbiont of Drosophila ananassae]"
/cog="ComEC COG0658 453 Predicted membrane metal-binding
protein"
/pfam="DUF4131 Competence"
/product="ComEC/Rec2 family protein"
/translation="MSLTSYRAAPSRVVAYLVIIYTNNEKIKIKFHMQISTHLLTFL
DIIVSYIRNNLRNEQYNLILWFPVFQCVGILTYFSLSFEPSCISIFLLLLPTLILIAI
LYKRYAILCIALIAVLIGFTASKLRALTALVDTQILDKERYVKDIVATVKDINDRGSYKQ
FLLSVEKSPTISKSSPVIPAPPFVIPVLDGTGIQKKKIWIPASRAGMTPDRALDNIRIS
VRTKVEKGIGKIGDQVKLSAKLFPLKIAPSEYAYDFARIAYYQKISATGFATSKIALHK
KAEARKFQEYIESFRQYIYENLQQNIKKPHADIISALLIGKKDGIDQKTMDAIRDSGI
AHLFAISGLHLSFVAGLFFVFRNLFAISETLTLKYNTKKISAFLLTILPTTFYLLITG

```

MQISAQRAYIMVILVLVAIMIERKYRGLIAIAFAASVILSVEPEAILKPGFQMSFSAV  
 LALVASYQINANKLFKIKIMKYFVSIMISSVIASLATVPYTIYNFNYSISGIITNLV  
 AIPIVTLIIIPLGIIYVLLIPFGIEWIIAPLVERPIDSILYITNAIASLQYLVPIRT  
 FPASSIIIIITFGLLWCLWERNWRFLGFFFIVLGICFSAAYKTPDILINADNVAAKES  
 DNLLYSLTRKSRNFVIKTWAKQNGQNQILNHTKYNNNSNKRLOCEDYDCIYNKGNNKSV  
 LLAYKKEDISENCDKVDLTIQLSEFRLFSLQR"  
 /besthit="qcoverage 99.0196078431373 , hcoverage  
 96.9821673525377 , similarity 98.6 , identity 97.6 ,  
 evalule 0.0 , alnlength 707 , Bacteria , Proteobacteria ,  
 EAL59121.1 ComEC/Rec2 family protein [Wolbachia  
 endosymbiont of Drosophila ananassae]"  
 gene complement(58993..59643)  
 /locus\_tag="wEsol\_00579"  
 CDS complement(58993..59643)  
 /locus\_tag="wEsol\_00579"  
 /codon\_start=1  
 /transl\_table=11  
 /fullproduct="qcoverage 100 , hcoverage 100 , similarity  
 97.7 , identity 95.4 , evalule 1.35e-148 , alnlength 216 ,  
 Bacteria , Proteobacteria , Q73G09.1 RecName:  
 Full=Pyridoxine/pyridoxamine 5'-phosphate oxidase;  
 AltName: Full=PNP/PMP oxidase; Short=PNPOx; AltName:  
 Full=Pyridoxal 5'-phosphate synthase [Wolbachia  
 endosymbiont of Drosophila melanogaster]"  
 /cog="PdxH COG0259 214 Pyridoxamine-phosphate oxidase"  
 /pfam="Pyridox\_oxidase Pyridox\_oxase\_2 PNPOx\_C"  
 /tigr="TIGR00558 pdxH 217 pyridoxamine 5'-phosphate  
 oxidase"  
 /product="RecName: Full=Pyridoxine/pyridoxamine  
 5'-phosphate oxidase; AltName: Full=PNP/PMP oxidase;  
 Short=PNPOx; AltName: Full=Pyridoxal 5'-phosphate  
 synthase"  
 /translation="MAVALIFATRARIKILFFDMIFSLEKDPFDLFSKWYKAVLNSPC  
 EQPTAMTLATCSKDCIPSARVLLKEYSKEGFVFFTNVNSKKGKELTENPKAALVFHW  
 IEF SRQVRIEGEVKLLNDERTDKYFSSRARDSQISAWCSKQSSILKDWQDFEQAIELK  
 NKEFYDQKVPRPDFWVGFCVIPKVIWFQEGEYRKHIRFRYTLVEGSDWKVEQLYP"  
 /besthit="qcoverage 100 , hcoverage 100 , similarity 97.7  
 , identity 95.4 , evalule 1.35e-148 , alnlength 216 ,  
 Bacteria , Proteobacteria , Q73G09.1 RecName:  
 Full=Pyridoxine/pyridoxamine 5'-phosphate oxidase;  
 AltName: Full=PNP/PMP oxidase; Short=PNPOx; AltName:  
 Full=Pyridoxal 5'-phosphate synthase [Wolbachia  
 endosymbiont of Drosophila melanogaster]"  
 gene complement(59603..60652)  
 /locus\_tag="wEsol\_00580"  
 CDS complement(59603..60652)  
 /locus\_tag="wEsol\_00580"  
 /codon\_start=1  
 /transl\_table=11  
 /fullproduct="qcoverage 100 , hcoverage 100 , similarity  
 99.7 , identity 99.7 , evalule 7.46e-233 , alnlength 349 ,  
 Bacteria , Proteobacteria , CDR79518.1  
 formamidopyrimidine-DNA  
 glycosylase,Formamidopyrimidine-DNA  
 glycosylase,formamidopyrimidine/5-formyluracil/  
 5-hydroxymethyluracil DNA  
 glycosylase,formamidopyrimidine-DNA  
 glycosylase,Formamidopyrimidine-DNA glycosylase  
 N-terminal domain [Wolbachia endosymbiont of Drosophila  
 simulans wAu]"

```

/cog="Nei COG0266 273 Formamidopyrimidine-DNA
glycosylase"
/pfam="Fapy_DNA_glyco H2TH zf-FPG_IleRS"
/tigr="TIGR00577 fpg 276 formamidopyrimidine-DNA
glycosylase"
/product="formamidopyrimidine-DNA
glycosylase,Formamidopyrimidine-DNA
glycosylase,formamidopyrimidine/5-formyluracil/
5-hydroxymethyluracil DNA
glycosylase,formamidopyrimidine-DNA
glycosylase,Formamidopyrimidine-DNA glycosylase
N-terminal domain"
/translation="MIMNNTKKNKEKEEEEKKRLAKALKQNILKRKKQQQSRQRTL SKL
VCGE EFLGESTAEYSNVFENDKITIRNLSFEGGIMPELPEVEVISNFLDKIKNKQIS
NVIVNNWNLRAPITKNIDMLKGKIVIRNIKRKGKTYIWN TDGSAVAVIIHLGMSGKLIY
ADHDQMRNKH DHVFLFSDNTSII FNDPRRFGLVIVLNKEQETDFFSDFGIEPLTDEF
SGDY LQELLKNKKVNIKSALMDNKSIVGVGNIYASESLFRACISPLRS AKNLT YRECE
KLAAEIKNTLSDAIAAGGSTLKDYAQPSGSAGYFQNNFYVYGKVQKPKICNNIITLI
RQNGRSTYFCNACQN"
/besthit="qcoverage 100 , hcoverage 100 , similarity 99.7
, identity 99.7 , evalue 7.46e-233 , alnlength 349 ,
Bacteria , Proteobacteria , CDR79518.1
formamidopyrimidine-DNA
glycosylase,Formamidopyrimidine-DNA
glycosylase,formamidopyrimidine/5-formyluracil/
5-hydroxymethyluracil DNA
glycosylase,formamidopyrimidine-DNA
glycosylase,Formamidopyrimidine-DNA glycosylase
N-terminal domain [Wolbachia endosymbiont of Drosophila
simulans wAu]"
gene complement(60792..>61158)
/locus_tag="wEsol_00581"
CDS complement(60792..>61158)
/locus_tag="wEsol_00581"
/codon_start=1
/transl_table=11
/product="hypothetical protein"
/pfam="Carboxyl_trans"
/tigr="TIGR01117 mmdA 512 methylmalonyl-CoA decarboxylase
alpha subunit"
/translation="YAEATVPKISLITRKAYGGAYIVMNSKHLKGDINYAWPTAEIAV
MGPESAVEIIFRHEKDQQT LIKEYKEKFANPFFAASYGYIDDIIVPSKTRYHFCKALE
LLKNKKVERIWKKHDNLPL"
/cog="COG4799 COG4799 526 Acetyl-CoA carboxylase,
carboxyltransferase component (subunits alpha and beta)"
/besthit="qcoverage 100 , hcoverage 44.8148148148148 ,
similarity 100 , identity 100 , evalue 1.73e-80 ,
alnlength 121 , Bacteria , Proteobacteria , EEH12500.1
propionyl-CoA carboxylase, beta subunit, partial
[Wolbachia endosymbiont of Muscidifurax uniraptor]"
gene 6389..6460
/locus_tag="wEsol_tRNA-07"
tRNA 6389..6460
/locus_tag="wEsol_tRNA-07"
/gene="tRNA-Glu"
/intronpos="0..0"
/program="tRNAscan-SE"
/cove_score="62.3"
/evidence=predicted
/type="Glu"

```

/anticodon=TTC  
 /product="tRNA-Glu (TTC) "  
 gene 7385..7458  
 /locus\_tag="wEsol\_tRNA-08"  
 tRNA 7385..7458  
 /locus\_tag="wEsol\_tRNA-08"  
 /gene="tRNA-Pro"  
 /intronpos="0..0"  
 /program="tRNAscan-SE"  
 /cove\_score="75.8"  
 /evidence=predicted  
 /type="Pro"  
 /anticodon=TGG  
 /product="tRNA-Pro (TGG) "  
 gene 14175..14247  
 /locus\_tag="wEsol\_tRNA-09"  
 tRNA 14175..14247  
 /locus\_tag="wEsol\_tRNA-09"  
 /gene="tRNA-Val"  
 /intronpos="0..0"  
 /program="tRNAscan-SE"  
 /cove\_score="69.8"  
 /evidence=predicted  
 /type="Val"  
 /anticodon=TAC  
 /product="tRNA-Val (TAC) "  
 gene 58913..58989  
 /locus\_tag="wEsol\_tRNA-10"  
 tRNA 58913..58989  
 /locus\_tag="wEsol\_tRNA-10"  
 /gene="tRNA-Met"  
 /intronpos="0..0"  
 /program="tRNAscan-SE"  
 /cove\_score="75.9"  
 /evidence=predicted  
 /type="Met"  
 /anticodon=CAT  
 /product="tRNA-Met (CAT) "  
 gene 60666..60738  
 /locus\_tag="wEsol\_tRNA-11"  
 tRNA 60666..60738  
 /locus\_tag="wEsol\_tRNA-11"  
 /gene="tRNA-Thr"  
 /intronpos="0..0"  
 /program="tRNAscan-SE"  
 /cove\_score="71.6"  
 /evidence=predicted  
 /type="Thr"  
 /anticodon=GGT  
 /product="tRNA-Thr (GGT) "

# ORIGIN

```

1 gtttgtctaa cgcttaagcc ctgagaaact attttttctg caatactttc cgcattttca
61 acattaatca acgctcttgc atgacccata gacaattttt tctcattgat cattgttttc
121 accctatcag ggagcaacaa catccgaatc atattggtta tgtggctgcg gcttttgcct
181 atagctgaag ctaattcctc atgtgtatag aaaaactcat ctatcagttt tctgtaagct
241 tcaccttcct ctattggatt aatatcttgc ctttgtatgt tttcaataat ggatacttcc
301 aagcattcct tgtcgctcag atcttttatg ataaccggtg cactatcaag atttgcaatc
361 ttgcttgctc gccaacgacg ttctccagct attatttcat aaccatcatc atttgaatct
421 ttgcgtacca cgataggctg tataatgcc cttttcttta tcgaatttgc aagtctctt
481 aatgactcct cgtcaaaatg tttcctcggt tgaaatttgc ttgggtgcag taatgaaata

```

|      |             |             |             |             |             |            |
|------|-------------|-------------|-------------|-------------|-------------|------------|
| 541  | ggcaaagtgt  | cttgtcgatc  | ttctttatta  | tcataattat  | cgccctatgag | gccggcaaga |
| 601  | cctctgccga  | ggcgtctatc  | atccttcata  | ctacgccctc  | gcttactagt  | ttcttctcct |
| 661  | tacaactgct  | cgcgtgcttt  | tttaaaat    | cccttgccaa  | acttatatat  | gcttgtgcac |
| 721  | caggacactt  | aagatcatac  | acaatagcgg  | gttttccatg  | agaaggcgct  | tctgataacc |
| 781  | gtacgttacg  | tgggaataaca | gtctcataca  | atgggatgat  | agttttgtat  | actttatcat |
| 841  | ttaaatactg  | gcaaataatcg | tttttaattc  | gttactgag   | tttgttgccg  | ctgtcataca |
| 901  | ttgttaacac  | tatcccttct  | attgccaaaa  | aagggtttag  | gttatttctt  | tttatcagct |
| 961  | ctacagtttt  | aactaaatgg  | cttaatccct  | ccaaagcaaa  | aaattcacac  | tgaagaggga |
| 1021 | caataataga  | attagcagca  | gtcaaagcat  | ttatggttag  | aagcccaagt  | gatggagggc |
| 1081 | aatcgatgat  | tatatactca  | taattatcgc  | gtatcttctc  | taatgcgctt  | tttagcacia |
| 1141 | attttcctcg  | ctcaagtgtg  | gataattcaa  | tttctgcagc  | tgataaatca  | actactgacg |
| 1201 | aaattagtga  | taaatttgga  | atttccttta  | tattgaaaat  | tgccgattct  | atcaatttat |
| 1261 | tttcgctgct  | tagtagtatt  | ttgtatatat  | ttttttcttc  | cctactacga  | taagaaatcc |
| 1321 | cgagcccggg  | gctagcattt  | ccttgaggat  | caagatctac  | caataaagtg  | ctttttccca |
| 1381 | cagcagcaaa  | ggctgtcgat  | aaattttatac | tagttgtggg  | tttgccaact  | ccaccctttt |
| 1441 | gatttactat  | tgcaataatc  | ttgctcacgc  | cttttatctt  | atgtataaaa  | taattctatt |
| 1501 | gtatatatgc  | aagaaacttt  | tgcattagaa  | aatttttttg  | ttgttaacca  | cactaaaatt |
| 1561 | agactgtctt  | ttttgctttg  | tgtaacacac  | tttgaacctt  | gtttcctaata | tcattcagag |
| 1621 | tgaatggttt  | tggcaaaaag  | tgaaaatctt  | ctatatattg  | gtcatcactc  | tttaaaaaag |
| 1681 | catcttctgc  | ataccagaa   | ataaaaaataa | cgttgatatt  | tggcctatgg  | atcaatgctt |
| 1741 | ctttaactat  | ttctgggccg  | ctcacctctg  | gcatgattac  | atcagtgatt  | ataagatcta |
| 1801 | tgtgttgact  | ttttttactg  | attattttcta | gcgcctcgct  | gcctatgctt  | gcttctatta |
| 1861 | catcaaattc  | ttttcttttg  | agtgttttag  | agatgaattc  | ccttactgaa  | tcttcatctt |
| 1921 | cgattaataa  | aattatacca  | ttacctttaa  | tttcaactac  | taccggtttt  | tctgtttctt |
| 1981 | cactatcttc  | ctctctatca  | ttttcatctg  | atatgtaaac  | catgggcaaa  | aatatgctaa |
| 2041 | atthagttcc  | atgatttact  | ttgctagcaa  | catagatgta  | tccttcagtt  | tgtttaataa |
| 2101 | tgccatatac  | agtagagagg  | ccaagacctg  | taccagaggt  | aatatctttg  | gtagaaaaaa |
| 2161 | atggatcaaa  | gatcttttca  | gttgatcac   | tcgtcattcc  | acatccagta  | tcaattactt |
| 2221 | caatcacaa   | ataatttcca  | tgttcaatcg  | cttccttgct  | tggagaaaac  | atatcctgag |
| 2281 | gtgtagaatt  | taatgagtca  | atcttttgat  | taaagggttcg | tatagttaat  | tctccgcctt |
| 2341 | tttccatagc  | agcactagca  | ttgactgcta  | agttaagtat  | aacttgctct  | aattgccctt |
| 2401 | gatcagccct  | aacagcaccc  | aagtctctac  | cataataaat  | attaaatttt  | atattttcac |
| 2461 | ctattaatct  | ttttatcatt  | tcataaagat  | tagctatagt  | attattttaca | tcaataattt |
| 2521 | ttggctgcaa  | gggtctgtct  | cttgagaaa   | caagcaattg  | tcttactaaa  | tttgatccac |
| 2581 | gctttgcatt  | ttgctgtatc  | tgtattatat  | ctccaaaaga  | tgggtcacca  | gctgagtgtt |
| 2641 | ggagtaaaa   | caaatcgcaa  | aatcctatta  | tcccagtcac  | tatatgtgtg  | aatcatgcg  |
| 2701 | caataccacc  | tgctaactgc  | cctatagctt  | gcatcttttg  | ataatgctca  | agctttatct |
| 2761 | ctagggtttt  | gtgttcagta  | ttgtcaataa  | aataacaaag  | tatgaagatc  | attttattat |
| 2821 | gaagaaactt  | attgaaatat  | atttttatgt  | tattaccgcc  | gttgagctgt  | acatcaaagg |
| 2881 | acgcattatt  | tattctatta  | ctcgaaaaat  | attcacgtat  | tttcacatga  | taactatcca |
| 2941 | atatcaatgt  | aaagattgaa  | ttattatctg  | accctgcaag  | ctttattagt  | gccgtatttt |
| 3001 | tctttacaaa  | gttgccggtt  | atgtcacatt  | gtgcaatagc  | aattgatgaa  | tttgcaaaa  |
| 3061 | aagggtgtaa  | ttgataatca  | acaagatttg  | attcggttgg  | tgttataaag  | ccatatatat |
| 3121 | agctatgggt  | gtattttatca | caaaatatag  | cagtgtcat   | ataagccttg  | aatggaatac |
| 3181 | cacttatagt  | aaaaaacaaa  | atttcattat  | cggttattgt  | attgtttatac | ttagattgag |
| 3241 | atataaaaatc | actgattgag  | ctaccttttt  | ccagtttttt  | cagttcaaat  | atgtctaaaa |
| 3301 | atctttttatt | tacagataaa  | atcactcctt  | tggcatttgc  | aatgtaagtt  | cctatactgt |
| 3361 | gttttttctat | taactcttca  | tatatctgct  | ccttgtttat  | ctgtgttgct  | tttaacacaa |
| 3421 | aatacccatc  | tggccttgct  | attggcacta  | atgataaatt  | taaaatctta  | ttactattta |
| 3481 | tagcaatttg  | gggattatct  | ggtattggct  | caaagagcaa  | aagaaagtta  | gatactctat |
| 3541 | tcttcttggt  | taaggaaaatg | catacctgta  | cagaagagtt  | attttttagt  | gcatgataga |
| 3601 | gtactttttt  | gtctgcttct  | gaaacatctc  | ctatttcaag  | aatcttgctt  | aacgtaatgt |
| 3661 | catcatctat  | tatatgatct  | ttaaaccttt  | cgtagaacct  | tgcatcagca  | taaataacac |
| 3721 | cctcatcttt  | atgtaaaaata | aggtaaaatt  | ctgtattatg  | athtagtgca  | tttgcaataa |
| 3781 | ttgcattttg  | aaattctata  | gtattaagta  | ggtatctgta  | gcgtttttaca | ttatacatca |
| 3841 | taaagagagt  | tgttagaatg  | ctaactaata  | aattaatctc  | tatattaata  | tgctgactat |
| 3901 | atatatcaaa  | aaagtagagt  | atcgatattg  | ctactggagg  | taagagcata  | ataactgcc  |
| 3961 | tcacaacaat  | tgacattcca  | taatttctta  | gtatgaagtc  | aacctgttcc  | tcttttttgt |
| 4021 | tatctatgta  | tcttttactc  | attattgtta  | cttggcattg  | ttgtacatac  | gaaaatgttt |
| 4081 | tatttatattg | atttaattat  | tatagattta  | ttaacgtctt  | tgatagataa  | ttatcatcca |

|      |             |             |             |             |             |             |
|------|-------------|-------------|-------------|-------------|-------------|-------------|
| 4141 | aatctaatta  | agttccttaa  | atatcagata  | taacaatggt  | aataagctag  | cgagagggtg  |
| 4201 | ttatggaaaa  | acaaagaaca  | caagcattta  | aatgggttctg | tgcactaaga  | gataagatca  |
| 4261 | tagaatcttt  | cttattaatt  | gaaaaacaat  | catccgcaga  | gccaaagatc  | gaaaagagaa  |
| 4321 | agtgggatcg  | cccaggtggt  | ggaggtgggtg | aatctacaat  | tatttttgggt | aatgtttttg  |
| 4381 | aaaaagttgg  | agtaaacggt  | tcaaaagtac  | acggaaaatt  | tgcagattca  | gccatcaatg  |
| 4441 | aaattcctgg  | tgcaagtga   | agtaacggag  | agttctgggc  | aagcgggtata | tcttttagtgt |
| 4501 | ctcatatgca  | atcgcccctt  | atccctgcag  | cgcataatgaa | cacaaggctg  | atatatactt  |
| 4561 | caaaacaatg  | gttttggtgga | ggaatggatt  | ttacgccaat  | atatagaaat  | gaagaagatt  |
| 4621 | gcaagtatat  | tcatgaatca  | atcaaaatga  | catgtgatag  | atttgacacc  | ggatattatc  |
| 4681 | caaaatttta  | agagcaatgt  | gacaattatt  | ttttcttaca  | acacagaaaa  | gagccacgtg  |
| 4741 | gcattgggtg  | catttttctat | gataatctga  | gttctggcaa  | ctgggaaaac  | gatttttgagt |
| 4801 | tcacaaaagc  | agtaggtgaa  | gccttttttgg | aaattttattc | gcacgtcata  | cgtaaacata  |
| 4861 | tgcaaaaatc  | ttggacaaaa  | gaacaacgag  | aaaatcaatt  | aataaaaacgt | ggcagatatg  |
| 4921 | tagaattcaa  | tctgtttatac | gatcgtggca  | caagggtttgg | tttaatgacg  | gacggcaatc  |
| 4981 | cagatgcaat  | tatgatgtca  | atgccaccac  | ttgttaagtg  | gttatagaga  | gctgctatta  |
| 5041 | gtagaaaata  | aatcatcata  | gttttaaaatt | gcaccatgat  | agtgagcttt  | tatatagggg  |
| 5101 | gtataatcat  | gggcataata  | gataattttt  | taattaaatc  | tgtcaaaaac  | aatgacataa  |
| 5161 | aaggtgttaa  | actgactcta  | attctctatg  | atgcattaaa  | tagtttttaga | aaattccttt  |
| 5221 | caaagactat  | gtctctcaag  | aatacaggat  | catttgatat  | aaataataat  | caagctttaa  |
| 5281 | atcaggcttt  | aggacatgct  | acagatcaca  | aaataatgga  | attgctgatt  | aatcgtggag  |
| 5341 | ctgatatcca  | ctcaatagat  | gagaatggaa  | agaatgttat  | aattcgtgtt  | attgagagtt  |
| 5401 | tagcagaatc  | aaaaaatcta  | aaattggata  | gtgagaaaaa  | cttaccagca  | gagataattc  |
| 5461 | ttcacccccac | agtttccttt  | ttactaggaa  | aaggcgcaga  | gtattattct  | acagatgatt  |
| 5521 | tgaatgttga  | agctatacaa  | caaaaacctc  | ctagaacctc  | tgaatatgag  | ccaataacta  |
| 5581 | tgtacgctga  | ggtgaacaac  | aatgtaatac  | cacctcaaaa  | accttctaga  | acttttgagt  |
| 5641 | ataagccaaa  | gagcactaat  | tatgatgctt  | tgccttcaaa  | agagccaatt  | tacgctgagg  |
| 5701 | tgtatgatgc  | taagggttagt | aactcattag  | gggagaatgg  | ttatttgagt  | gtatcagaag  |
| 5761 | aatctatttta | tgctgaaata  | tatgattcac  | ataaaaaatc  | cactgaaaat  | ttatcattgg  |
| 5821 | aagatagtgg  | ttatttgagt  | atatcagaag  | aacctattta  | ttgcactata  | gatgatcttt  |
| 5881 | cagaacaaaa  | aaagcctgct  | agcctaaaaac | agaaagagcc  | agaacagtcg  | tcagaaccta  |
| 5941 | tttatgctag  | ggtagatttg  | tccaagaaaa  | gagcagaaag  | aaaagcaaaa  | gacataaaag  |
| 6001 | ctaattctgg  | aacttgccat  | gggttagtgc  | aagataaagt  | gaatgattgg  | caagtgaagc  |
| 6061 | taaatgagct  | aagtgcataat | aagtcgataa  | gtcagcaaca  | gactaatgat  | caaaaaatta  |
| 6121 | agaccaaggc  | tggcttttagt | gtagaagaaa  | taaggcagaa  | atatgagcgt  | agagattctg  |
| 6181 | gctacgattc  | tggctatgat  | tccgatacaa  | aagttgaaca  | acaattagaa  | ttagctccta  |
| 6241 | aatctgagat  | aggtttcagt  | agtattgagc  | atggagtaat  | aggaggctgt  | cgatataaga  |
| 6301 | ttactgatata | atccctctaa  | ctatgtgatt  | caaaataatt  | gaattgactt  | tatatatgta  |
| 6361 | atcgatataa  | cctagttaga  | ttcaagttga  | ctctttcgtc  | tagtggtttag | gacaccaccc  |
| 6421 | tttcacggtg  | gtaacacggg  | ttcaaattccc | gtaagagtca  | ctcaaataga  | atataattaa  |
| 6481 | agtttttaaat | gggaaaaaatt | aggcttttatg | ttgaagaagc  | tttatcacia  | ggcgtgagtt  |
| 6541 | tagcacttaa  | tccacaacaa  | agtcactata  | tttgcaatgt  | aatgcgggctt | aagaagtatg  |
| 6601 | ataatctctc  | tcttttttaat | ggaaaagatg  | gagaatgggt  | aggagaagta  | gttaatatat  |
| 6661 | cgcgtaaaatt | gacaaaaaatt | acactcaaaag | aatgtgccaa  | acaacagcaa  | tatgaggaaa  |
| 6721 | atttataacct | gtattgtgcc  | atggtaaaaa  | gtgctgcttt  | gaacaacata  | gtaagacagg  |
| 6781 | caactgaaat  | gggaataaact | tgcattcaat  | ttatttcaac  | ggaacgtaca  | gtagtaaaaa  |
| 6841 | acattaacct  | aagtagagca  | aaattacaag  | caatcgaagc  | agcggataa   | tccggtagga  |
| 6901 | tgagtatacc  | agagattttg  | cctcctatta  | acttttgcca  | attacctgat  | tcccagagta  |
| 6961 | aaaattttgt  | tttatgtgat  | gaaacaggta  | aagctgataa  | agtgctgaaa  | ggtaagaaaa  |
| 7021 | atgttgctat  | tattgttggc  | cctgaagggtg | gtttttcatc  | ttatgaactt  | gatcttgccg  |
| 7081 | ataagttttg  | tcaaaaattg  | agtctaggaa  | aaagaatttt  | aagagtcgat  | accgctgtgg  |
| 7141 | ttgctgcact  | aactttcacc  | aattgggtgta | gctagatttt  | taaatatggc  | taagataaag  |
| 7201 | aaatctgggt  | cagtgtttgcg | cgcacaaaaa  | ccctgtagac  | tttctacgaa  | gcagtctggt  |
| 7261 | gttaaagagg  | agctaataaaa | aaacatatctc | taagataata  | ttaaatctca  | tattatattt  |
| 7321 | tttctaaagt  | aaacaaatga  | atcttgcatt  | ttgcctgagt  | tattgatact  | ctgagtaaa   |
| 7381 | aagtcggggc  | gtagcgcagc  | ctggtagcgc  | atgttggtttg | ggaccaaaag  | gtcgggagtt  |
| 7441 | caaatctctc  | cgccccgatg  | ttagtataat  | tgtaagaacg  | ctgtaacata  | agagtaatct  |
| 7501 | ccatcagtaa  | gcaagtagct  | gacactggaa  | tgacattatt  | caccatgtaa  | attatggcat  |
| 7561 | attacatttt  | aacgctcaag  | tttataaaa   | aattgacaat  | gttaattttt  | taatttataa  |
| 7621 | atagattttg  | aaatgattac  | cgaaggaggt  | atagagtttg  | atagaagtat  | cagtccatta  |
| 7681 | tggatgatga  | gacagagctc  | ttccagtatt  | gaaaaaaaaca | attcaaaag   | aaggaagagg  |

|       |             |             |            |             |             |             |
|-------|-------------|-------------|------------|-------------|-------------|-------------|
| 7741  | gttgaaaatg  | aaaaaacaat  | atcatgaaaa | aaaatcagaa  | aaaagagcta  | aaaagaaagc  |
| 7801  | tgaagctaaa  | aaaaagaggt  | accaacaaga | gtgcagaagg  | cagcgttatg  | gttggtagtt  |
| 7861  | tgtactcagg  | ttaatagttt  | atcattgggt | attttatgaa  | tattcacgaa  | tatcaagcga  |
| 7921  | aagaagtttt  | gcataaat    | aatgtcccag | tgccaaaagg  | ttttgttgct  | acatctgcgg  |
| 7981  | aagaagtaaa  | gactcaagta  | agtcaattaa | aatctgacgt  | gtttgtagtt  | aaagctcaaa  |
| 8041  | ttcatgcagg  | tggtaggggt  | aaagccgggt | gcgtaaagct  | agcaaagtca  | gttgaagaag  |
| 8101  | ctcaacagtt  | tgtaaaggac  | atgattggta | tgactttagt  | tactcatcaa  | acagggccaa  |
| 8161  | gcgggcagca  | agtaagaaaa  | gtgtacgttg | aagaaggctc  | aagcattaag  | aaagagtatt  |
| 8221  | atttaagcct  | ggtaatcgac  | ccgaagctca | gtaggccaat  | attcatat    | tcctcagaag  |
| 8281  | gtggaatgga  | cattgaagaa  | gtggcgaaaa | attctcctgc  | aaaaattgtg  | aaatttgata  |
| 8341  | ttgattctgc  | tacaagtttt  | gatagcagca | agttaagcag  | cagttttgat  | ttgagtccag  |
| 8401  | aacaaataga  | aaagatatcg  | aacattgcaa | aaaaaatata  | tgatgcgttt  | attgcaactg  |
| 8461  | acgcgagcca  | aattgaaatt  | aatccactgg | tgaaacaaa   | ttctggagat  | tttattgcgc  |
| 8521  | tcgatgcgaa  | aattaatttc  | gatgacaatg | ctttatatcg  | tcaccagaa   | attatggaac  |
| 8581  | ttcgtgatta  | tgatgaagaa  | gtgaaagaag | agatagaggc  | ttcaaaatat  | gggctcagtt  |
| 8641  | acatcaaaat  | ggatggcagt  | attggttgca | tggtaaacgg  | tgcaggctct  | gctatggcaa  |
| 8701  | caatggatat  | aataaaatac  | tacggagcag | agcctgctaa  | ctttttggat  | gttggtgggtg |
| 8761  | gagcgagtaa  | agaaactgta  | actgaagcat | ttaaaatcat  | attgtctgat  | agcaacgtaa  |
| 8821  | aaggaattct  | ggttaacata  | tttggtggta | taatgcgttg  | cgatattatc  | gcaagtggaa  |
| 8881  | ttgttgccgg  | tgcaaaagaa  | atgagcatta | aagttcctct  | agtggttaga  | ttatcaggta  |
| 8941  | ctaattttga  | agaaggaaaa  | aaaatcttag | aagagtcagg  | attaaatatt  | attgctgcag  |
| 9001  | atgaactggg  | tgatgctgca  | caaaagatag | taaaagaggt  | aaaataaagc  | atgtccgttt  |
| 9061  | tagtaaacaa  | agatacaaga  | ttaatatgcc | agggttttac  | tggtgcacaa  | ggcacatttc  |
| 9121  | attcagagca  | agcaattgat  | tacggaacga | aaatgggtgg  | aggtgtaact  | cctggaaagg  |
| 9181  | gtggtagcac  | tcaccttaat  | ttaccggttt | ttaatactgt  | agcagaagcc  | aaagaaaaaa  |
| 9241  | ccggtgcaaa  | tgctacagtt  | atatatgtac | ctgctaaatt  | tgctgctgct  | gcaatacttg  |
| 9301  | aagcaataga  | tgcaaaaata  | gaattgataa | tttgatttac  | agagggcatt  | cctatacttg  |
| 9361  | atatggtgaa  | agttaagcgt  | gcgcttatcg | gctcaaaaag  | tcgattgatt  | gggtcccaact |
| 9421  | gtccgggaat  | tattcacact  | gaagaatgca | agataggaat  | tatgcctggc  | catatccata  |
| 9481  | agcgtggaca  | cataggaatt  | atgtctcgct | ccggaacttt  | aacttacgag  | gcagtagcac  |
| 9541  | aaacaaccgc  | tgttggtctt  | ggtcaatcca | cgtgtatcgg  | aattgggggg  | gatccaattc  |
| 9601  | atggtatgac  | atttgtcgac  | tgtatggagc | tctttttaaa  | agatgacgat  | actcatggta  |
| 9661  | ttgtagttat  | tggtgaaata  | ggtggaaacg | aagaagaaga  | tgtatcacat  | tttgtgaaaa  |
| 9721  | cagaaaaaac  | taaaaagcca  | atcgttgggt | ttgtagcagg  | ccaaacggca  | cctccaggaa  |
| 9781  | gacgtatggg  | acacgctgga  | gcaatcatct | cctccagcgg  | tggaagtgct  | ggtgcaaaac  |
| 9841  | tagaagttat  | gcggagtgcc  | gggattgcaa | ttgctgaaac  | ccctgcagta  | attggtaaga  |
| 9901  | aggtattgga  | agtaatgcat  | cactagaatt | agggtcacaa  | aaaccctata  | tcaccgggtca |
| 9961  | tgaatacggt  | atttgccccat | tcgattaata | acttgccctc  | tggtaaat    | actgaagtct  |
| 10021 | gttgggcaac  | cagatatcca  | cgtagtgtgg | atgcaacaag  | tgctgcacag  | gctgcactac  |
| 10081 | cgcatgatgc  | agtaatgcct  | gtacctcttt | cccaaactct  | taaagctatt  | tctccagact  |
| 10141 | tttcaacttg  | tgcaataacta | acattaattt | tccgaggaaa  | taatgcgtga  | ttttctagct  |
| 10201 | ttggtcctaa  | atttcgcaat  | ggtatttcac | ttatgttatc  | aacaaaaaaa  | actatgtgag  |
| 10261 | gattgccaat  | atttactgca  | acaggatctt | ttagcatttc  | aagctctata  | ggtaagtga   |
| 10321 | gagtgtcaca  | ctcagtagac  | aagggaattt | catgccattt  | tagcaaagggt | ttacccatgt  |
| 10381 | taacctttat  | ggatttatca  | cccactttta | aacactctaa  | aatgcgtttg  | cttggttagct |
| 10441 | caataatgga  | gtattcagca  | cctttttctg | acattatcaa  | atatccaaca  | cagcgtgctg  |
| 10501 | cgtttcgcga  | catttcagct  | cgactgccat | cagcattata  | gatatgcata  | aaacagtcctg |
| 10561 | cagcattaga  | cattgttata  | attatcactt | gatcacaaact | gctttgatca  | gcaatttgctc |
| 10621 | tatggttcca  | gtctaaattg  | tttggtgaac | gtgagtctat  | gataacgaaa  | ttgttaccag  |
| 10681 | tgccgtgcat  | tttgataaaa  | ttttcagaat | tttggccact  | catcataaaa  | aaatatttct  |
| 10741 | tctattggct  | ttcttttctt  | cttacttggt | tcagcaccct  | cttcttcgta  | accaaccgct  |
| 10801 | atcactgaca  | ttacgttaaa  | gtcattgggt | atattgaact  | ctttcactat  | tttatctcta  |
| 10861 | tcaaattccac | ccatttgatg  | ggccattaag | ttcataactg  | cagcttgtaa  | cataagtcca  |
| 10921 | taatttgctg  | caccagtatc  | atgattagcc | caaagatttt  | ctcctttacc  | ttggttacgg  |
| 10981 | aagtttttag  | cacttaaaga  | tatgattaac | acttgtgcat  | cttttgccca  | tttttgatta  |
| 11041 | gattcatcaa  | ggcaatttag  | cagcttttcc | catgcgcttt  | gattgttctg  | tttggtgcat  |
| 11101 | attacgtatc  | tccagggttc  | atcaccaaaa | catgagggag  | tcagccttac  | agcttccatt  |
| 11161 | aaaatatcca  | tgtcttcctg  | agatattgct | cttgtaggat  | cgatatgaacg | tccgctgtgt  |
| 11221 | cttgctttca  | tcaacgataa  | tagatcttgt | ttactcatca  | tttttaattt  | aatagtgcatt |
| 11281 | aaataattca  | ttgtagcaca  | atataagcaa | aatttaaatt  | gcaaaacctc  | tcatacacat  |

|       |             |             |             |             |             |            |
|-------|-------------|-------------|-------------|-------------|-------------|------------|
| 11341 | atattacatt  | taataagtta  | tttttattgg  | gaaggatatgt | ttataacaca  | atctagcagc |
| 11401 | agatcaacac  | tggctgaaat  | attgtcttgc  | gttttacttt  | tattcttgat  | ggctcaaata |
| 11461 | agcataccat  | tgcagcctgt  | gcctatcaca  | ttgcaaactt  | taggagtaat  | gcttattggg |
| 11521 | cttaaattta  | accgcagaac  | agcattctat  | tctgtgctta  | catatctatc  | acttggtgca |
| 11581 | gcaggattgc  | ctgttcttgc  | gaatttttct  | ggtggttatc  | acgctcttct  | tggaccaacc |
| 11641 | ggtggatatt  | taattggctg  | tttagctgct  | gttatggtaa  | tgagcaaagt  | aaatgaatta |
| 11701 | ctgaactcta  | agtataaatc  | atttgtatgt  | aattctttta  | gttgtctggc  | tggtagagtt |
| 11761 | gtaatcttta  | tttgtgggtg  | tagttggctt  | gctgtttact  | tgggtctggg  | acaagcaata |
| 11821 | atgggtgggtg | ttttaccatt  | tatccttctt  | ggtttgataa  | aaatttttct  | acttgtagca |
| 11881 | gctttgcaat  | atttgaaaaa  | atgataaaat  | ttcgccctca  | tcatttcatg  | tgcaccctcg |
| 11941 | cgtttcgggg  | atatgggtat  | tctcagggtt  | ttgtagaaaa  | ttataaaaagg | atagcaagca |
| 12001 | aagtaattag  | tactcaaata  | gaagtagttg  | gtaaccttga  | taatatctgt  | agtgttctgc |
| 12061 | caaatcagac  | taaacaaggt  | aaatgcacca  | cacaagctaa  | agtttttagag | ctagatagaa |
| 12121 | ggcatatgga  | aatttttagga | attaaaattg  | gcgagacttt  | aacttggaat  | gaggcagtaa |
| 12181 | aaaagattag  | ggagaaaaatg | tcttttaaaga | aattcgagta  | cgcatgtgag  | gggtgcaact |
| 12241 | ggcagccata  | tgggaatatgt | aaaaatgccc  | ttttaaatct  | acaaaggtag  | ttgacaaaat |
| 12301 | gttaagataa  | attgaagcat  | ttttgtggaa  | ataaagcgaa  | atatggaaga  | caaaagataa |
| 12361 | atgcattctg  | aaaagctaca  | cagcatgttc  | gtcccgcctaa | ttaataatat  | ctttattatt |
| 12421 | gtatgagata  | ggtaatttag  | catttatgaa  | tttgtaaatgt | gttacgcata  | gctcaaagaa |
| 12481 | ataaggttta  | ctggttacac  | gctgcagcca  | atgccacaac  | actaggacct  | atgtttatct |
| 12541 | gcatgttaat  | ttgcgttgtg  | attttatgga  | ggtcttctgt  | tacctatgct  | agtgaaaatt |
| 12601 | tggagataca  | aaaggccttc  | gatagtgttg  | tcaagcatat  | aaaagctgat  | aaaaaatata |
| 12661 | aagattttga  | tgttattgag  | agaaaaagtg  | acaaatttaa  | tatcaaaatt  | tcgcagaatt |
| 12721 | ctggcaagag  | ttttgacata  | tactctactt  | taaaaaaagc  | aaaagattcc  | tttgaatcag |
| 12781 | gagataatga  | agcagctatt  | tctctcctta  | atcagattat  | cgcaaagtgt  | ccttatcata |
| 12841 | aaaatgcttt  | aattggattg  | ggaaatat    | attacgctaa  | taaagaatac  | aaaaaagctg |
| 12901 | tagagattta  | cacaagactg  | ttaaaagaac  | accctagtaa  | cccttacata  | ttaaaaaatt |
| 12961 | ttctgacgat  | aatctcacia  | tatgatcctg  | atctggcggt  | gagtgaatg   | ttaaaattgt |
| 13021 | atgatataca  | taaaaattat  | gctcctttat  | tagcaaat    | aggtctgatc  | tatatgaaaa |
| 13081 | aggaggatta  | tgtaaaaggt  | aaagagtata  | tgataactgc  | tatttccctc  | gatgaaaaca |
| 13141 | atatttttta  | tacttataat  | ttagctgtta  | ttctagataa  | actttcagat  | tttcaaaatg |
| 13201 | ctacaatatt  | ctacttaaag  | ttgttaaaca  | tggctacaac  | ttcgaaagat  | gtgagtga   |
| 13261 | aaataccttt  | atacaaagtg  | acagcaagac  | taaaatttat  | aaaacttcac  | agcacgcacc |
| 13321 | caaagatttc  | ataaaagctt  | atagcttacc  | taaagctaat  | ttatcgtatc  | tgttcaaggg |
| 13381 | agtggcta    | gtgcaaata   | tgaagcaaag  | tgtgtgacac  | acagctgtac  | gaacatttgt |
| 13441 | ttgcaaaggt  | aatttgcaca  | acaaatgcat  | aactgtacga  | acattgtgat  | tttggcccat |
| 13501 | caggagggtg  | tcacccag    | gcttgacact  | gggatggctt  | tgttgcatcg  | ctacttatga |
| 13561 | aaggctaact  | atagtttagga | ttataagcaa  | cctattgaaa  | atcttgtttt  | tttgcaatca |
| 13621 | atctgatcaa  | atttaagaat  | agtaatttgt  | tatttatatt  | aataaattta  | attctattga |
| 13681 | aaatagctaa  | agcattgaaa  | ttcttgaatt  | ttagccggat  | tggtaaattg  | tagtgaaatt |
| 13741 | tcttttactc  | aaatttaggt  | attcattgac  | cgttcttgtt  | ataaatacca  | gaataataag |
| 13801 | ctactgat    | tccctatctt  | ttttatcttt  | aatccatcat  | agctagcgat  | gcaacaaagc |
| 13861 | ccactgggat  | ccaggaattt  | tattaagttg  | gcgagcataa  | aaatagctgt  | tttatgtaaa |
| 13921 | aatacaacgt  | tttaatgatt  | atgaaaaagc  | tggattccag  | tgtcaagcac  | tggaatgaca |
| 13981 | ccattctttt  | ttctggatcc  | cagtgtcggc  | tacttggatg  | acaccattta  | ttgtaaggac |
| 14041 | ttacctcaca  | tttactctat  | gattatcttt  | ttagatcacc  | ttgtctacct  | attttgccac |
| 14101 | tctgctgaac  | ggatacaatt  | tattgctatt  | tttgtttaca  | ataataatat  | tgagctatag |
| 14161 | aattgatct   | aaaggggcaa  | ttagctcagc  | tggtagagca  | tctcgtttac  | accgaggagg |
| 14221 | tcggcagttc  | aagtctgtca  | ttgcccattt  | gcttaactga  | atgttagtat  | tattaattac |
| 14281 | ttcaattaaa  | gtatagaaaa  | tgcaggataa  | tatagtacca  | atctcaatag  | taaaagagct |
| 14341 | ggaagattct  | tatctttcct  | acgcaatgag  | cgttatcata  | agccgggcta  | tacctgacgt |
| 14401 | gcgggatgga  | tttaaacctg  | ttcacaggcg  | catattatat  | gcaatgtcaa  | gagctggatt |
| 14461 | cgatgccggt  | aagccatata  | aaaaggcagc  | tcgtatagtt  | ggggatgtaa  | tggggaaata |
| 14521 | tcacccacat  | ggtgatgcag  | ctatttacga  | ttccttgggt  | agaatggccc  | aagatttctc |
| 14581 | tcttctttta  | ccacttgttg  | atgggcaagg  | taactttggt  | tcgatagatg  | gagatccacc |
| 14641 | agcttcaatg  | cgatacacag  | aagcaagact  | tcaaaaaagt  | tcgcactttt  | tactgaatga |
| 14701 | tattgatgaa  | gatacagtta  | attttagggc  | aaactacgat  | ggaaatgaaa  | cagaaccagt |
| 14761 | tgtgctgcct  | gcagagtttc  | cgaatctatt  | ggtaaaccgt  | gcaagtgggt  | ttgcagttgg |
| 14821 | tatggcaacc  | aatattcctt  | ctcataatct  | tggagaaaata | atagatgctt  | gtatatata  |
| 14881 | tgtaaataat  | cctgaagtta  | ctttggatga  | gttacttgaa  | gtgatgccag  | ggccggattt |

|       |             |             |             |             |             |             |
|-------|-------------|-------------|-------------|-------------|-------------|-------------|
| 14941 | tccaactggg  | ggaacaattc  | ttggaaggtc  | tggaataaga  | tcagcatttg  | caactgggtcg |
| 15001 | tggatcaatt  | gttgtgcaag  | gcaagactca  | tatagaagat  | ctgccacaag  | ataggcaagc  |
| 15061 | aatagtgatt  | gatgaaatac  | cttaccaggt  | aaataaagta  | aaattaattg  | agaagatagg  |
| 15121 | tgagcttgta  | aaagaaaaaa  | gaattgatgg  | tataacagaa  | attagggatg  | agtccgataa  |
| 15181 | gtctgggtatt | agagtagtaa  | ttgacctcaa  | aagaaatgct  | gaagcaagtt  | ttataacttaa |
| 15241 | tcaaataattg | gggctaactc  | cactaagaag  | tagtttttagt | gttaacactt  | tagtgctcaa  |
| 15301 | taacaacagg  | cctgctttga  | tgtcattgaa  | agaaatcata  | gaggccttta  | ttgatttttag |
| 15361 | aaaagaagtg  | ttaatcagga  | gaacagaatt  | tcgtctaaga  | aaaacgagag  | aaaaagctca  |
| 15421 | tatatatata  | gggctctaca  | ttgcggtcct  | cagcatagat  | gaagtgataa  | aaatcatccg  |
| 15481 | cggtgcaaaa  | gatcctgcgg  | aagcaagtag  | agaactttta  | aataaagaat  | ggaaaacttc  |
| 15541 | gaatgaaatc  | aacactatta  | tcgagttgat  | ttcagatagc  | gcaagttttt  | tgaaagatgg  |
| 15601 | agtgtataga  | ttaactgagc  | tacaaattaa  | agctatcctt  | gatatgaaac  | tgcagcgttt  |
| 15661 | aacaggcctt  | gaaaaagaca  | aattagaagc  | tgagctaagt  | tcaatgatca  | acctgataaa  |
| 15721 | agaatatatc  | gcttttcttg  | gctcaggaga  | gaagttgatg  | aaagaaataa  | aaaacaatct  |
| 15781 | acaagaaata  | aagaacagat  | ttgctgtgcc  | gcgaaaaact  | tcaatagaag  | agtcagacgt  |
| 15841 | ggacattgaa  | gctgaagatc  | taattccaca  | agaggatatg  | gtgataaccg  | taactatgaa  |
| 15901 | tggttatatc  | aagcgtgtaa  | aactttctca  | ctacagaact  | cagcgtcgtg  | gtggaaaagg  |
| 15961 | aaagctagga  | cagggattaa  | aagaagagga  | tgtaatcaca  | gaattatttg  | ttggaaatac  |
| 16021 | ccatactagc  | tttttattct  | tttctaacat  | tggtcgagtt  | tatagattaa  | aagtttataa  |
| 16081 | gttacctctt  | gcagagccaa  | ccgcacgtgg  | aagagcactt  | gttaacatat  | ttccgcttag  |
| 16141 | cgatggtgaa  | actataacta  | atatcatgcc  | attgccaaagt | gaaaatgacg  | aaaatcaaaa  |
| 16201 | catagttttt  | gctactgcct  | atggaaacat  | aaggcgtaac  | tccttagcgg  | actttcacta  |
| 16261 | tattccaagc  | aatggaaaaa  | tagcaataaa  | gctcgatgaa  | ggagacaaat  | tagtatcggg  |
| 16321 | taaggtatgt  | aatgaaattg  | accatgtttt  | actttcaaca  | acgcttgga   | aaagtatcag  |
| 16381 | atttggtgta  | agtgatgtgc  | gtcaatttaa  | gagtcgcaat  | tcagatggcg  | taagaggtat  |
| 16441 | caaacttgta  | aagaatgaca  | gcgtgatatc  | catgaccata  | ttaaatggga  | taggtgtaac  |
| 16501 | aacagaaaca  | aaagaacttt  | acttaaaagt  | tccacttgca  | aaaagactgg  | ggactgcaat  |
| 16561 | taataactcc  | attgattcta  | aattggaaaa  | gactttgaat  | gatttaggaa  | tagataacga  |
| 16621 | attattctta  | aaacttgca   | tgaatgagga  | gtttatatta  | actattactg  | aaaatggcct  |
| 16681 | tggtaaaaaga | acttctgcgt  | atgaatatag  | agtaactaac  | aggggtggtg  | ttggtatcac  |
| 16741 | caatattctt  | actactagca  | gaaacggtaa  | tgttgttgct  | agttttccag  | ttgagcaggg  |
| 16801 | tgataatata  | atgcttatta  | cagataaaagg | aaagttaatt  | cgcatttcgg  | tcaatgagat  |
| 16861 | tagaattgca  | ggacgcagca  | ctcaaggagt  | cactctgttt  | aaaacagaaa  | gtagagaaaa  |
| 16921 | agtgggtgtca | gtagcgaaaa  | ttgaagatcc  | tgattccact  | gaagatagta  | tttttgaagt  |
| 16981 | tgaaaactct  | atctcttctc  | aaccgtagta  | cagggttaaac | aaaaagcgca  | agtttttggt  |
| 17041 | gattaatacg  | cagtatttaa  | attaaaaatat | atacttatgg  | ctaagtaaa   | atcaatggac  |
| 17101 | aaaaatttaa  | ctaaaaataa  | aaaaccactg  | gcaaacaaa   | aggataaaaa  | aacacctcct  |
| 17161 | gttaaagacc  | ttactaaaaa  | taagagtagg  | agagatttta  | taacattaac  | tacatgcgct  |
| 17221 | atggcaggta  | taggagctgc  | aagcggactt  | tggccactgg  | ttaaatctat  | gaatccttct  |
| 17281 | gctgaagtcc  | tagcaacttc  | cacagtggag  | gtgaatttgt  | ctggaattca  | ggaaggacac  |
| 17341 | ggagtaaaag  | taaagtggca  | aggtaaacca  | gtattcattc  | gtagacgcac  | aaagcaagaa  |
| 17401 | attgaggctg  | caagagctgt  | gaatgtgaag  | agcttgaggg  | atcctcaatt  | agatgagcag  |
| 17461 | agagtatacg  | aaggaaaaaga | cgaatggtta  | attatgcttg  | gaatatgtac  | acatcttggg  |
| 17521 | tgtgtaccgg  | ttgaccacgc  | tacaagagat  | ggtaatgggt  | ggttctgtcc  | ttgccacggg  |
| 17581 | tcatattatg  | atacatcagg  | ccgagtgatt  | gggggtcctg  | caccgaaaaa  | tatggctgta  |
| 17641 | cctgattatt  | tttttcccag  | tgagaatgtt  | gtggtaattg  | gcaagaaggc  | ttaacggaac  |
| 17701 | tcgttaaaaa  | aaactcacag  | gatcaacatc  | tattatcact  | gcaataactg  | aattcaagtt  |
| 17761 | acaattttta  | atccaatatt  | tcagcttttt  | ttgtatagat  | aaactgtgtt  | tattgtgtat  |
| 17821 | ttttaataat  | accctatgcc  | gatacttatt  | atttaaaaaa  | tttattgctg  | ctggtgatgg  |
| 17881 | gccaagaatt  | tcaaattcct  | ttttgtctac  | acctacattt  | ttttcctgga  | tacaagtagt  |
| 17941 | taagctactt  | ggataacaaa  | gaagagattt  | tactatttca  | ttcgctgctt  | tttgtgttgc  |
| 18001 | aatctgattc  | ttaccacaaa  | ttataagcgc  | tattaatctg  | ctaaatgggtg | gcattttggc  |
| 18061 | ttcgcgtctt  | gacttaagtt  | cgatttcata  | aaatgagctc  | cttttttgat  | gcagcaatgc  |
| 18121 | ttttattatt  | gaactttcag  | gattattagt  | ttgcactatt  | accatttcct  | tttcattaaa  |
| 18181 | ccttcctgat  | ctgcctgcaa  | cttggtgcaa  | taattgatac  | gtcttttccg  | ctgctcttaa  |
| 18241 | atcagaatth  | tcgaggtc    | aatctgcatt  | tattactcca  | accaaagtta  | atttgggaaa  |
| 18301 | attgtgcccc  | ttagcaatta  | tctgtgtgcc  | gattataatg  | ttcacctctt  | cctttaacac  |
| 18361 | taaatcaatg  | atgttactaa  | ccgacttctg  | atcgctgctt  | atcatcgcat  | tttttgctt   |
| 18421 | tgggtattaat | ttcaccattt  | cttcaagtaa  | cctttcaatt  | cctatgccgt  | agagggacaa  |
| 18481 | tggctgttca  | ccttggaat   | tagagcattt  | ttctggaagt  | ttcaattgat  | aagagcagtg  |

|       |            |             |             |             |             |             |
|-------|------------|-------------|-------------|-------------|-------------|-------------|
| 18541 | gtggcacaaa | agagcatttt  | ttttcttgtg  | atatgtaagc  | caaacagcac  | aatttaagca  |
| 18601 | ggaaattttt | tatccacact  | ttttacaaat  | tgccagttgt  | gcataccctc  | tgcggtttag  |
| 18661 | aaaaagcata | acctgctgtt  | ttttctctat  | ggtttgtttg  | atgctttcaa  | aaagctcaga  |
| 18721 | ggagatccat | tgcttgttgt  | tcctcatatc  | tactacttta  | atgagtggca  | attctgcacc  |
| 18781 | accaaatcgc | ttagttagct  | ttacatgatt  | gtaattcccc  | tttttaacat  | gatgaatcgt  |
| 18841 | ttcaagcagt | ggagtagctg  | atgataaaat  | aatcggaata  | ttttcaaatt  | tggctaagat  |
| 18901 | tatcgccata | tctcgagcat  | tatatataat  | tccctgttct  | tgttttaaag  | atgagtcgtg  |
| 18961 | ctcttcatca | acgataatca  | attttagggt  | tttataaggc  | aaaaaaagcg  | ctgaccgtgc  |
| 19021 | accaataatt | atctgcgcat  | ttccatttgc  | tatattgagc  | caattattcc  | ggcgagtttt  |
| 19081 | tggagtgagc | cctgagtgcc  | attcaactaa  | gttttttgat  | atctgaccgc  | gaacacgatt  |
| 19141 | taccaattgt | gaagttaaaa  | caatttcagg  | taggaggatt  | aaaatttgtg  | tattaccttc  |
| 19201 | tcctgatgtc | atttcaacat  | attctgggtg  | catactagta  | cgtggcaaag  | acggtatgct  |
| 19261 | aaatgttaca | gtgggttttg  | ccttgagtat  | aaaggtgtca  | ttccagtgtc  | tgacactgga  |
| 19321 | atccaggaat | tttgattgta  | aattaggtat  | tggttttaag  | ttaaaataaa  | catttgtaat  |
| 19381 | gaggttatat | gaaaaactgg  | atcccagtg   | caggctactc  | ggataacacc  | ctcttggtag  |
| 19441 | acccaaatca | caatgttcgt  | acagtttgtg  | ctctgggcac  | tgggatggta  | aagtctgagc  |
| 19501 | agcatttgga | acggcagtg   | aattcttaat  | caattgtgca  | atcacagaga  | gataaacttc  |
| 19561 | ggtttttcca | gatcctgtct  | caccgtcaag  | caaagtcact  | gaatactcgt  | tcaaattgct  |
| 19621 | tattatttta | tcactagcta  | tctgctgttc  | agggcttaat  | tggcaactta  | tttcaactgt  |
| 19681 | ttcctgcttt | tgttcaacac  | aaaccaat    | atctatgtga  | tttactttta  | acactcctcc  |
| 19741 | cattatcact | ttggcaagca  | taccaatagg  | tattaaattg  | tattgtgcaa  | cccactctgc  |
| 19801 | aaatgcaatc | aattttgttc  | taatatttgg  | taaatcgatt  | ttttgctcaa  | taaattttta  |
| 19861 | ttctcggtta | cttttatcac  | tgtatttcca  | aactattccg  | attaagcggt  | ttttgccaaa  |
| 19921 | tggcaccact | acgtaatctc  | caagtaaaat  | ctcagtattt  | tcctcaattg  | catatgaaaa  |
| 19981 | taactgatca | attggaagt   | atagtaatac  | gtcaactgtt  | tttgccatag  | tgattgagtt  |
| 20041 | taacattggt | ttaaagagct  | tgtaacttta  | ttaagcctgg  | caatatagat  | gaatcggtac  |
| 20101 | agagaaaatc | ttaacgttta  | acacattttt  | catagtacag  | accgtatgat  | tgataaataa  |
| 20161 | aatgatattt | agaatttgtg  | gaggctacca  | atgggtcaacg | acaagattac  | tttgaacttt  |
| 20221 | gaaatagaaa | aaggcgaacc  | tatagatcga  | tactactttt  | ctgcacatat  | aaagcttaca  |
| 20281 | gatgaaagca | aaaatctttt  | gcgggagaag  | cttggcagta  | caattcaatt  | cgataaatcta |
| 20341 | gatgatcact | tcaatcttaa  | ccatgagaat  | ttttatatct  | actacaacaa  | atatagtgag  |
| 20401 | cacaatggta | gaagtgagct  | acacgttagg  | gatgataacg  | gtaaatat    | aacctccaat  |
| 20461 | cttccactta | attactatgg  | attctcaatg  | gaactatcac  | ctgacggagc  | gtcaattgca  |
| 20521 | gattatgggt | tttatcctct  | gtatgcaatc  | tataacccaa  | atcactataa  | taaagcaaag  |
| 20581 | gaaaaagtat | ttgatgatca  | cgggtgaattg | tcaccaattg  | catcaaattg  | gttagataat  |
| 20641 | tttttaagca | acacaaatag  | cttaaccaca  | caagatatat  | tacaaaatgt  | attctcacia  |
| 20701 | ctgcagaaga | aagctgatga  | agaagcagaa  | agattggcaa  | gagaaaagaga | agcagaaaaga |
| 20761 | caaagggagg | aagagttaaa  | tgaaaagaac  | gaggagttaa  | aagaacttgt  | agaaaaggat  |
| 20821 | gagattaaaa | tattcaaagt  | ggtaaaaggt  | aatgatttag  | gtaatgggca  | ttcagcagta  |
| 20881 | gttttacaac | ttgatgggga  | agaaggtgac  | aagatacctc  | tcgactctag  | taaatactac  |
| 20941 | atagcagagt | atagacacca  | cccagaatgg  | gaaggcgatg  | aatattttaa  | ttttgttagc  |
| 21001 | cctgatagt  | atatgctggt  | taattatgaa  | aacttatttt  | ttgtgctcaa  | tcaaagctcc  |
| 21061 | tactcagact | ttgaaagtgg  | gttttattca  | gaaaacagaa  | ccgatcccca  | taattatgct  |
| 21121 | aatatttcaa | aggaaccata  | tttgagtgg   | gaccagctat  | ctgaaaaatt  | atctaattgaa |
| 21181 | ttggaggaag | atagcaatca  | gataggtact  | gaatttacia  | ttgatgatga  | gcaagtagac  |
| 21241 | gaagaagt   | tggtagagag  | tgaagccaag  | tctggggaga  | aaggaacgg   | tggtaggat   |
| 21301 | aacgcaaaaa | atactataca  | ggaagaagaa  | tctaactata  | tagatcaaat  | gcaagcggat  |
| 21361 | gatagcagca | gttataaacc  | agctttgcaa  | agcaatcgtg  | atgattatgc  | tgatacgaaa  |
| 21421 | aaagctctgc | aggaaaaatt  | gcatggagat  | gaaatacaca  | agcaaagtaa  | tgagaaagct  |
| 21481 | caaaaagata | tagaagtaaa  | aaaagtaact  | gtggaaaactg | acagtagcag  | taataagact  |
| 21541 | gaaaaacaaa | caaaaaccaac | agaagatgaa  | caagaaaactg | ttatggcaag  | tgtgatagaa  |
| 21601 | aatatggata | aaaattctga  | tattgaagca  | gaaacttcta  | acagtgttgc  | aaattcacia  |
| 21661 | catcccttaa | aaataaagac  | aggaagtcc   | cttgaagtgg  | gaaagtataa  | ggtaggagctg |
| 21721 | caagtgcac  | atgatgatgt  | aaagaat     | tatgataccg  | tacgtggtaa  | atatcatgct  |
| 21781 | ggcgatggat | ataactacga  | acaagtaatg  | gttttatata  | atgaaattgt  | taggcccgct  |
| 21841 | cacaatcatc | attacgagct  | gtttactctt  | gatgaagcac  | atgttgctaa  | tgatcacctg  |
| 21901 | tttatcaagg | gtcaggat    | tggaactcta  | aatgatttta  | atgagatgtt  | ctataaaagt  |
| 21961 | gatgagttaa | tgtgatgtaa  | aaagcaagat  | tcaatctggt  | gaacgagagt  | taactgacag  |
| 22021 | aggagattga | cacgtatgcc  | tttatcttta  | agattgttta  | tcaagtatag  | acatcagctc  |
| 22081 | gccccattct | cttttacc    | tattactttc  | ttctctagta  | acgttttccc  | cttttaattaa |

|       |             |             |             |            |             |             |
|-------|-------------|-------------|-------------|------------|-------------|-------------|
| 22141 | tttgcgaatt  | atctctagac  | cagttcttga  | aatacaggct | gattctaggc  | aatattcaac  |
| 22201 | aaaggcattg  | taggccagtg  | gaacccattt  | ttttattata | tccagcataa  | cttctgcata  |
| 22261 | aactctgatt  | tcatattggg  | catgcttata  | agctctaagc | ttcaaaaaat  | gaaggagatt  |
| 22321 | atgcagatct  | atcttccaat  | aaaattgcgt  | gtagtaatta | agcattaggt  | tagttctggc  |
| 22381 | aatttctctt  | gcaagcccct  | gctcaataaa  | tttttcataa | tgagaatata  | ctaaattaga  |
| 22441 | gtcatttggt  | agagaatcta  | ttatttcctt  | tgaggatctt | ggatcaaaag  | cttccccgct  |
| 22501 | accttgttta  | ttattgtcag  | attgttttgc  | aacttggtct | ggtttaggtg  | tataaaattc  |
| 22561 | attatcaagt  | attgaatacc  | ttgctgaata  | ttcattcaca | tttgcagttc  | tatgccttat  |
| 22621 | ccattgcctt  | gcaacaaaaa  | ttggaagttt  | cacgtgaaac | ttaatttcac  | acatttcaaa  |
| 22681 | tggagttgta  | tgatgatgtc  | tcattaaata  | ctttataagt | gcttcacctc  | gacttatctg  |
| 22741 | ttttgttccc  | ttgccataag  | aaacacgagc  | agcttgaact | atagcgctat  | cagagcccat  |
| 22801 | ataatccact  | actcgaataa  | atccatgggtc | taatacctta | tgttcttcat  | ataagattgc  |
| 22861 | atctatttct  | tttactatag  | ttcgtttggt  | tgcttcattc | ataaaatata  | ctcaagacga  |
| 22921 | aatggagata  | tcagctccac  | atgaattgag  | tttttcatgc | attgcttcat  | atcctctcca  |
| 22981 | taaatgatgt  | gaattgttta  | ttatagtttc  | tccaccgggt | accaaagaag  | caagcaccaa  |
| 23041 | agctgctggt  | gatcttaagt  | cagtagcata  | tagattagct | ccagataagc  | tttttattcc  |
| 23101 | acttatagta  | gctttgcttt  | tctcgatgct  | gatattagca | cctaactttc  | tcaattcatc  |
| 23161 | tgcatgtgta  | aatctgtttt  | caaaaatggt  | ctcttcaatt | actgatatac  | catcagcgat  |
| 23221 | gcacattgca  | gacatcagtt  | gtgggtgcat  | atcactggga | aaattgggat  | atggatctgt  |
| 23281 | cgcaacgtta  | gcagacttaa  | tagagccatt  | ttttctggaa | ataacaatgc  | ctccatcata  |
| 23341 | cagttcaacc  | atagctccta  | tagtctccaa  | ctcatttgta | atacacctta  | tatcagatag  |
| 23401 | atctattcct  | tccaactcca  | acttaccacc  | ggttattata | gcagctagtg  | cataggtgcc  |
| 23461 | tgcttctatg  | cgatctggta  | ttattttatg  | aacacatcca | tttagtgctt  | caactcctgt  |
| 23521 | tattatgacc  | tttgatttat  | caatttcaat  | atcagcacc  | atcttcttca  | gaaaatctat  |
| 23581 | taaatcaaga  | acttccgggt  | cagttgcagc  | attgtttatt | gttgctactc  | cttctgcaaa  |
| 23641 | tgttgctgcc  | attattacat  | tttctgttgc  | gccaacactt | atcttctcaa  | atgtgatttc  |
| 23701 | ttttccttgt  | agctttcctt  | tcactgttgc  | aattatatta | tagccgtcaa  | tttcaatttt  |
| 23761 | agctcccatt  | tcttctaata  | ctttaatatg  | catatcaacg | ggacgctttc  | caatgttgca  |
| 23821 | tccaccagga  | aatgctgttc  | tcgctttgcc  | aaatctgcta | agcattggac  | ccaatattag  |
| 23881 | aaaagaagtt  | cttagcttac  | ttgcggtttt  | atatggcatc | acgtgattgt  | tgatattgct  |
| 23941 | gcagtcaatt  | ttcaaagtat  | ggttcgcttt  | ataattttta | ttgtgcataa  | agttcacttc  |
| 24001 | tgctccaaga  | ctttcaagca  | acttagacat  | tagatgcaca | tcaattaaat  | caggtacatt  |
| 24061 | atgcaaaatt  | accggggagc  | tacttaatat  | acttgctgcc | attattggta  | aaacagcatt  |
| 24121 | ttttgagcca  | ttaatcttga  | tttttccgac  | caaagggttg | tagttatttc  | ttattaatat  |
| 24181 | cttggtgcatt | taattagata  | taaagtataa  | ttcattagtt | tattgaagtc  | ttactaagta  |
| 24241 | taatagattg  | accgtaaaag  | gcaaaatttg  | ctttttcttc | ctcatcatcc  | cagtgtcatg  |
| 24301 | ctacctgcat  | gacacctgat  | gcgaattgcc  | cccgaaaatt | tatactatga  | attactcaaa  |
| 24361 | tgacgctctc  | gagctttatc  | aaaccaaata  | acaccaattg | caacaatgaa  | ataaccagct  |
| 24421 | gtcctaata   | taaggcgaat  | tactgcatcg  | aaagttgaca | gaggaggaga  | cggcattaga  |
| 24481 | atgctcaaaa  | cactatacac  | aagattatct  | gttgcatgag | caatagttac  | tggccaaatc  |
| 24541 | gagttgtctt  | tttcaaacaa  | ccaggtaaac  | attatagaca | ttgcacaaat  | ataaagggtg  |
| 24601 | taagcacaaa  | tagtcgggaa  | tgtaaagcca  | tccttccaca | aagctgagcc  | agcaaccaca  |
| 24661 | taagttggta  | tgtgccatac  | tgaccaaata  | ataccgacaa | taattgctct  | gatataaaaa  |
| 24721 | tttgatattt  | tgtcttttaag | atctttcaaa  | agatagccac | gccaaaccgat | ctcttcacca  |
| 24781 | agagacataa  | tgatccacat  | cacaaagggt  | gataataaaa | caaataacat  | cactaatgga  |
| 24841 | ctcaaaactg  | cactcaaatc  | ctttacacgg  | tctaacgtaa | aagactctcg  | gaaaaatgaa  |
| 24901 | aaaccgcagt  | aaattgacaa  | aagaccattg  | gaaattagca | tacttaccag  | aataagtata  |
| 24961 | aaccctaata  | gacagttttt  | tggcgaacta  | agtttaaaaa | gatcccttac  | cttctgttta  |
| 25021 | ttataaatgg  | ttagcaaaat  | tgcaactgaa  | gccggaacaa | atgttggtta  | taatgttatg  |
| 25081 | tctttgaaag  | gtaagcacca  | agctataatg  | cacgtcaaaa | aatatgtaat  | tacaacaaat  |
| 25141 | aatgtacaat  | taatagtggg  | taaattcatg  | catacgccca | tcaattcctt  | ttctgcatta  |
| 25201 | ttgatcttta  | ttcataaatt  | gtcaataaaa  | tacttcttca | gggatgaata  | gaatattttt  |
| 25261 | tctttttgaa  | ttgctattga  | tagtttaatt  | tttatatgta | ttccatttca  | caaccgtttg  |
| 25321 | tcatcccagt  | gtcacgtgct  | gggatgacag  | taggagagct | gcttgcatga  | caagaggagg  |
| 25381 | gtactggaat  | gacaagagga  | agacactggg  | gtgacatcaa | ctaaacttgt  | ccaaatatga  |
| 25441 | gcgatgcatt  | agtgccacca  | aaaccaaacg  | aattagaaag | tgcatattga  | atcttatgct  |
| 25501 | cctgagcttt  | aaacggtaca  | aaattttaat  | cacatccttc | tgaaggcttg  | tgtaaattta  |
| 25561 | aggttggtgg  | aataatccca  | ttattttaat  | caagaatact | gaatattgcc  | tcaacgcttc  |
| 25621 | ctgcagcacc  | aagcaagtgc  | cctgtagagg  | atcttagttg | agaaacgggt  | atctttataag |
| 25681 | cgtaatcgcc  | gaacaacttt  | ttcattgcta  | tcacttcgat | tttatctcca  | agtgggtgtg  |

|       |            |             |             |             |             |            |
|-------|------------|-------------|-------------|-------------|-------------|------------|
| 25741 | aagttccatg | tgcattgata  | taccctactt  | gattgggatt  | aatttgtgca  | ctatgaagag |
| 25801 | caagttgcat | tgcttttaaat | gcgcctcttc  | cttctggatg  | cgggtgcagt  | atgtggtgtg |
| 25861 | cgtctcctgt | gagtcacatat | ccattcagtt  | cagcatatat  | ttttgctccc  | cttttttttg |
| 25921 | catgttcgta | ttcttccaac  | accaatatac  | ctgctccttc  | accataaca   | aaaccatcgc |
| 25981 | gttctgcatc | ccatggtctg  | gaagcttctt  | tgggtttatc  | attgaattta  | gttgataacg |
| 26041 | ctttcataga | tgcaaaacct  | gcaattccaa  | ctctacacag  | tgcactttct  | gctccacctg |
| 26101 | caatcatcac | atccgcttca  | ccaagtttta  | tagttcttgc  | tgagtttatg  | attgcatgcg |
| 26161 | cacctgttgc | acatgcggtt  | actgctgaat  | cgtttggacc  | tgtaaattcg  | tatttaatag |
| 26221 | aaatatggcc | agatatcaaa  | tttattagac  | ttgcagggac  | aaaaaatgga  | ctgacacgtc |
| 26281 | tgggcccttt | ttcttgcatt  | gtaataacat  | tttcttgaat  | tgacggaaga  | ccacctatac |
| 26341 | cagagccaat | agtcacacca  | acacgttccc  | gattgatatt  | ttggctttcc  | aaaattaatg |
| 26401 | aatcatctac | tgcttgaata  | gctgctgcaa  | taccgtaatg  | gataaaacga  | tctgtccttt |
| 26461 | ttgagtcttt | ctcagaaata  | taatctagt   | gattgaaatg  | gtgctcaatg  | ttgtctgatt |
| 26521 | gcaacggcac | ctgccctgca  | attttgcaag  | caagatcaga  | agagtcaaat  | ctatccgtat |
| 26581 | tgattgcttt | tatgccggat  | tcacctttta  | ttagccttaa  | ccaagtgttg  | tcaacatctg |
| 26641 | ctgctagtgg | agtgattaaa  | ccaacaccag  | tgactactac  | tcttctgctc  | atttaacact |
| 26701 | aactattagc | cttttttatt  | attaatgtac  | tcaactat    | gtcccatagt  | ttccattttt |
| 26761 | tgtgcgtctt | catctggaat  | ttctatcccg  | aactcttctt  | ctgccgccat  | gatgatttca |
| 26821 | actgcatcta | aactgtccgt  | accatgctcc  | gaaagctttg  | aagagctggt  | gaatttctct |
| 26881 | acatccttac | taatgtgctc  | tagtataatc  | tttttctact  | tttcttctat  | gtcttctcta |
| 26941 | gtgctctttg | ctagtctgct  | attcacattt  | cttaccaaaa  | aaataaccta  | ttctttgatg |
| 27001 | ttataaaaaa | tttttatggt  | tgcaatatct  | tttataactg  | gtaaactaca  | gcaaagtttt |
| 27061 | ctactgccct | agctggctag  | cgttacgtgc  | taaacaatta  | acaattcaaa  | aatgctagac |
| 27121 | gaaacaacaa | aaaatttgct  | tattgtagaa  | gtaaacaaac  | tcttaccoga  | aaatagcgag |
| 27181 | aataagctta | tatcagctat  | gcgttatata  | ctccttgctc  | ctgcaaaaca  | tatacgctcc |
| 27241 | tttttagtca | tagcttcatc  | gcaagtgttt  | aacgcggaag  | ctaaaaaagt  | aatatcagtt |
| 27301 | gctgcagcaa | ttgaatttgt  | tcattgcttac | tctctaattc  | acgatgattt  | accgtgcatg |
| 27361 | gacaacagtg | atactcgcag  | aagccagcta  | agctgccata  | aaaaatttga  | tgaagcaaca |
| 27421 | gcagtgcctg | cgggagatgc  | actacttact  | ctggcttttg  | aggtattatc  | ttcgtaaata |
| 27481 | gagaaacgct | gtgagatcat  | aaaagtgtc   | tctcaagcaa  | taggaattag  | gggaatggtg |
| 27541 | ggaggacagg | cttttagatat | tgacacagat  | tttaacaaaa  | taaaagaaat  | tcatttgatg |
| 27601 | aaaaccgcaa | aactatttgc  | agcttcatgt  | gaaataggtg  | ctataatagg  | gggtgctaca |
| 27661 | gatgaacaac | ggagagcggt  | atataactac  | gggataaacc  | tagggcttat  | ctttcaagct |
| 27721 | aaggatgata | ttgaagacta  | cgaacaagat  | aaaacaaata  | acctaattgtc | tgtgcttggg |
| 27781 | aaaagtgaag | tagaggacta  | tatagacggc  | ctcttttaaac | aaggcttggg  | taatttgagt |
| 27841 | gcgctttcag | gggatactaa  | ttattttatat | gattttattga | atcaagtaaa  | gaaagatggt |
| 27901 | tagaaaaatt | atattacaaa  | tgcttatttc  | cgtagtaattg | attctcactt  | taacttctgc |
| 27961 | ttttgtgttt | actattgtct  | atataaacia  | aggtaaaccg  | gaaaaaaagg  | acaagcttta |
| 28021 | tgagataaat | gccacgcattg | gtggtttgat  | acagacgata  | gcatattacc  | tagtgaagcc |
| 28081 | aatacttgaa | tcagcacttg  | accgctatat  | tgaaaagcat  | gggctaacag  | aatatttaga |
| 28141 | agaaatgacg | cagcaaaaaag | aagaggattc  | gataaaatttt | tatgaaatta  | ctgaaggcag |
| 28201 | tggcagcaag | gctttttgtg  | gcctggaagt  | cctattgcaa  | atatataaaa  | tttctaataa |
| 28261 | taactcagca | acactcccta  | gcaaagtttc  | tgatgttact  | ttgaaaatag  | gtcaagatga |
| 28321 | cctaaaagaa | gtgagtttag  | gggcaatagg  | tatgaaagaa  | ggcggagagc  | gtgtagttac |
| 28381 | tattgccaat | gagaacaaaa  | tgaattttta  | ttcttattac  | gtcaaactga  | tccaagtaaa |
| 28441 | ggataaatat | cccgactcag  | taaataatct  | gatggttttt  | aatgacttaa  | ttacaagac  |
| 28501 | tggaaaacaa | gtaaggtgcg  | gtgatgagat  | atcgggttaa  | tatagcgtaa  | aggagcataa |
| 28561 | tggggaatat | atagtcaaag  | atcaaacagt  | gcaatttagg  | gttggcgata  | aaaaaatacc |
| 28621 | acttgctata | gagcttggag  | ttgtgggaat  | gagagctggt  | aataaaaagaa | ctattctttc |
| 28681 | tccgcctgac | cttttgacta  | ttactgacga  | tatgttaata  | aaagacatag  | attatgatga |
| 28741 | aaaaaatatc | tcaataattg  | acttaagctt  | agatgttaag  | caagaggtcg  | cagcacacca |
| 28801 | ttctactggt | gaaaaacagc  | ctaaagaata  | tagctgaaat  | tttaggtcta  | ctggctaata |
| 28861 | ttctgaacac | tctctatact  | acttaaagta  | ggcttttctg  | ttttcctaaa  | gtataaactt |
| 28921 | agataaatca | agctgcttcg  | aaattgactc  | aagtttatct  | tttacatact  | tgctgtctat |
| 28981 | aatgaatttt | tcgctatttt  | tctcagaagc  | aatgaaaact  | atttcatcta  | aaagcttctc |
| 29041 | catgacagtg | tgaagccttc  | ttgcgcctat  | attttccact  | tgccatttaa  | ctgtaaacgc |
| 29101 | tatttcagct | atggtttttta | taccatcatc  | agtgaactca  | agtgtcacat  | tttctgtttt |
| 29161 | cattaaagct | atgtactgct  | ttacaaaact  | agattctggt  | tcctttaata  | ttcttattaa |
| 29221 | atcctcttga | gtaagtgcct  | taagttctac  | cctgatcggt  | aatctgccct  | gcaattccgg |
| 29281 | taagaggtca | gatggttttag | actgatgaaa  | agcaccagat  | gcaataaata  | atatatagtc |

|       |              |              |              |               |             |             |
|-------|--------------|--------------|--------------|---------------|-------------|-------------|
| 29341 | tgttttttaca  | tggccatact   | tagttgtaac   | agttgttcct    | tcaagtaatg  | gtaacagatc  |
| 29401 | gcgttgcact   | ccttctctgt   | ttacttcacc   | ttttacttct    | gtacgcgctg  | caattttgtc  |
| 29461 | tatttcatcc   | aaaaatacta   | taccgtcatt   | actaacaaga    | tcaatggctt  | ctttgattat  |
| 29521 | cttatcttca   | tccattagcc   | tttcactttc   | ttcattaatt    | aataatttcac | gcgcttcttt  |
| 29581 | taccttcacc   | gtaatagttt   | ttgttttttt   | gctcccgtta    | aacatcttgc  | ccattatttc  |
| 29641 | tgttacattc   | atcacaccaa   | cttgcccacc   | tggcatgcct    | ggtatatcga  | aagtaggtaa  |
| 29701 | catactcttg   | ctctctctga   | cgttaataga   | aacttctccg    | tcctcaaact  | ctttattcct  |
| 29761 | caacctttct   | ctaaaaatth   | ttttactctc   | ttcggttgca    | ttttcgccta  | ccatagagtt  |
| 29821 | tactattggt   | ttctcagcta   | aaattaaagc   | cttttttagct   | aaggcttttac | gggctttctc  |
| 29881 | tttaactaaa   | actattgctg   | catcaactaa   | atcgcggtatt   | atcgaatcaa  | cgtcacgtcc  |
| 29941 | aacgtaccct   | atthtcagtaa  | acttcgttgc   | ctcaatthttt   | atgaacgggtg | caccggcaag  |
| 30001 | ttttgctaag   | cgacgagcta   | tttcagthttt  | accaaccctt    | gtatgaccga  | tcataaatat  |
| 30061 | attcttaggt   | atgatttcat   | cacgcaatgg   | aatgggaacc    | tgattgcgac  | gccaacgatt  |
| 30121 | tctgagcgca   | atagcaacag   | cacgctttgc   | atcatcctgt    | ccgattatga  | atctgtccaa  |
| 30181 | ttctthtaact  | atcttctgtg   | gtggcaggtc   | atctaacaaa    | acttgagtgc  | tgtcattaac  |
| 30241 | ttgaacatcg   | ctgtcatttg   | aatcaaaacc   | actcttagta    | tctthtataga | ggttatcttt  |
| 30301 | ttcatcgtag   | gtgtcactac   | tacaagaccg   | cccttctgaa    | aggggttatgg | gctgattgga  |
| 30361 | aaaattgggtg  | cataaagthtt  | tttgcttgga   | agacatatca    | ctcctctatc  | ttttcaataa  |
| 30421 | ctacattatg   | atthgtataa   | acacatatat   | cgccagctat    | cttcatagcc  | tttttcgcaa  |
| 30481 | tttcctctat   | tgatattcct   | thaatgtcaa   | thaaagctct    | tgctgcagat  | agagcaaaat  |
| 30541 | ttccccccaga  | gccaatagct   | gcgactccat   | cttcaggttc    | agaacatca   | cctgttcccg  |
| 30601 | taattactaa   | tgaaatagat   | ttatctgcaa   | cgatcatcat    | agcttctaath | ttcctcagat  |
| 30661 | atthtatccat  | tctccagtct   | tttgcaagtt   | caacacatgc    | tctcattaat  | tgccctgggt  |
| 30721 | gcttgtcaag   | thtagattct   | aatctthtcaa  | aaagagthaaa   | tgcgctcggt  | gthgccccgg  |
| 30781 | caaaccagc    | aattacggaa   | tcaccagaaa   | gacgcctaac    | ththththgct | ccagattthta |
| 30841 | taacagtgtg   | gcccagtgaa   | acttgtccgt   | cacctattac    | tactacactt  | ttatctthttc |
| 30901 | taattgataa   | tatagtagtg   | ccatacattt   | tattgttatc    | gtgttgaatc  | atththtctat |
| 30961 | cactthtaaat  | aagaatctca   | ttatactthta  | atctthtagtc   | aaatthtacta | aatatgtthca |
| 31021 | actatagctt   | ataatataath  | accttcctta   | thaacattthaa  | agtgacagatg | caaaacataa  |
| 31081 | ttcacccaga   | thtggaaaaa   | agtataaaata  | atthggtthcga  | agcaaaattht | aatggcctta  |
| 31141 | catcgccatt   | thtatagctct  | atagatctthta | gaaactctgg    | ctataaaaatc | gthccagtag  |
| 31201 | acgctaathth  | atthtctctgcg | gggtthcaata  | actthaaagtga  | agaatcaaga  | acgatggcag  |
| 31261 | caagattgat   | aaaaagctat   | ththaaaagac  | atcaatacaaa   | aaaggtthctt | ataataaccg  |
| 31321 | aaaattatac   | acgcaataaaa  | atgtatatag   | aaaacgtatt    | gtthtatagag | aaaatactac  |
| 31381 | aactcgcagg   | ththtgagact  | agaattggcc   | ththtatataa   | tgaagtatac  | aatthtaatag |
| 31441 | aacagtatga   | aactgtthgtg  | aaagaaaact   | ctctgctaaa    | gacaactthca | ggattthgtgc |
| 31501 | ctgatgttht   | tatactgaac   | cgtgatatga   | cgagccacat    | tccagacacg  | ctgaaagacg  |
| 31561 | taaagcaaga   | tatagtacca   | agcccactat   | acggtthggca   | tagcaggcag  | aaatthtaagt |
| 31621 | atthtgaaat   | ctatcaagaa   | thtagcatctg  | agthththgtgg  | cgaatthtaaa | atagacccat  |
| 31681 | ggctaaththc  | tgtgctthaca  | gagagctgtg   | atggagthtga   | ththtgatgat | gattthgtcac |
| 31741 | taggagcagt   | agcaactaaa   | gthtgacaaa   | tattatctct    | agtgcaaaaa  | aaatatgagg  |
| 31801 | aatatgaaat   | aaaaacacaa   | ccttacgthtt  | thtatcaaagc   | aagcaatggc  | acatatggga  |
| 31861 | tgggcattat   | aacagcaaca   | agtgagagg    | aaatatthaaa   | cctcaataaaa | aaaaagcgtc  |
| 31921 | ataaaatgaa   | aaagataaaa   | gaaggaaatag  | caatcaatag    | cgthattata  | caagaagggtg |
| 31981 | taccaaccat   | tgacatgthtt  | aaaagcagtht  | ctgcagaacc    | gctaataatac | tatataggag  |
| 32041 | atactccaac   | atgthtactta  | taccgatgta   | atagcagaaa    | agatgtatat  | tctagctthga |
| 32101 | atgccactga   | ctgtgagthtt  | catgatgthta  | gccaggtthgt   | agaaggthaaa | atthtctcac  |
| 32161 | thtgaggtat   | gtthtagcaaa  | thtagcagta   | tagcgthggc    | agtagaaata  | aaatctthttc |
| 32221 | atccctaath   | cttatacctc   | tacagtgtctg  | tcattagaath   | gaccgththt  | atthtgaaca  |
| 32281 | tcatcaagtht  | cagtggaagg   | atcatcattg   | acaggtthgtt   | gaaacaathth | gtcaagctga  |
| 32341 | actgcaagaa   | atactgcact   | ataatattatg  | ctgactgthta   | cgctthaaagt | gaaattatag  |
| 32401 | attataccat   | tacctaaagt   | tattgggtata  | gtthggagtht   | ctatcctthct | taatatgaag  |
| 32461 | thtaataaac   | ctaacgacaa   | agthtaatgtg  | ctaataataa    | gthtctthctt | acactcagca  |
| 32521 | gactththtcag | gatcctthatt  | atccagata    | tcctthgcatg   | tataataata  | gctthtaggt  |
| 32581 | tctgaaatga   | acaaaaatag   | gatcgthtgag  | gtthaaagtthaa | tataacttht  | tatgtctgta  |
| 32641 | thgctthccag  | tgcaaaaaatg  | gatgaththttc | aacatcattta   | gcgctthctat | ggtgctgctt  |
| 32701 | gcaagattag   | ccgaththtacc | cacaaththttt | gccagctctt    | ththtactctc | agggththctg |
| 32761 | taatcctthaa  | thtagatcctg  | tagagthaaat  | gcagaatggg    | caatgtatag  | aatagatgtc  |
| 32821 | ggaaactthta  | ctagtgcagc   | aacaththccgt | ataagaaaaga   | tattggatct  | atthattgtca |
| 32881 | atgaactcgc   | agcaaaaatthg | cagtgaathtc  | thacacaata    | gggctgthtaa | acctgtthgtg |

|       |             |             |             |             |             |             |
|-------|-------------|-------------|-------------|-------------|-------------|-------------|
| 32941 | atgcagatta  | ccttcctgaa  | atcatgatca  | taaatatcat  | gcaccctttg  | tgcgagtatg  |
| 33001 | ttagattttct | tttttagctt  | gtttggcatg  | aaatagttaa  | taacttcctg  | ttatttctatc |
| 33061 | acataaaatc  | ctaaaagaaa  | agccctatga  | atcaggactt  | taagggagat  | ttatgcacaa  |
| 33121 | atcgggctaag | cattttataa  | acaagggatc  | ggtactgaga  | gttggcacac  | gaaagtaata  |
| 33181 | tccatccttg  | ataattgctt  | tatattctat  | atcaagttca  | actagagttt  | ctgaatgctc  |
| 33241 | agaaacaaaa  | gatataggtg  | atagaactac  | aggtacacca  | tcagcttttg  | cgcgtaatag  |
| 33301 | ctcactttca  | gtgcttggct  | ctagccattt  | tacaggacca  | atcttactct  | gataacatat  |
| 33361 | tgaccaatct  | aagttattga  | tagctaactt  | ttctactatt  | aactctacgc  | ttctttctac  |
| 33421 | ctgtgaagcg  | taagggtcgc  | cctttttaat  | gatactaaga  | ggtaagctat  | gggctgaaaa  |
| 33481 | taggactctt  | ggtttaccga  | tttttctagc  | caatttatag  | tacttagcta  | tcagattagt  |
| 33541 | gtgagcttca  | ataaaatctt  | ggttatcata  | ataacggtga  | atcatttttg  | tattgcattt  |
| 33601 | taggccatac  | cgttttagcat | ttttttgcc   | attctcgatg  | gatgacagag  | ttgtggtagt  |
| 33661 | tgaatattgt  | ggatacagtg  | gcagcagaat  | tacttcgtca  | ggatcaaact  | gttttacact  |
| 33721 | ttcaataact  | tcgtcagcaa  | atggacgcca  | atagcgcgatg | cagatgaata  | ccttgtgtac  |
| 33781 | atggtttcta  | ttttcgttta  | attttagttc  | tgaagcatta  | gcttgcatth  | ttgtattctc  |
| 33841 | tagaattggc  | gatttacctc  | caatttcctc  | gtatatTTTT  | cgtgcagtat  | tttctcgttt  |
| 33901 | cgcagatata  | aactttgcta  | aaagaaaccg  | aaagggattc  | ggtagattga  | ttattctcct  |
| 33961 | gtcataaaaa  | agggtgaata  | aaaaaggacg  | gaccgcattt  | agtgaatcag  | gcccgcgaag  |
| 34021 | attaaataag  | ataactgcct  | ttttcaccta  | cgcactacta  | caacaagtta  | cttctggggg  |
| 34081 | gcctataaaa  | ttagctacac  | actcatcaaa  | tttagttata  | ggcactaaat  | ttcttacact  |
| 34141 | ggcatacaat  | aagtggcctg  | atctcttcag  | gttactcttg  | gtagatgtga  | agttccaatc  |
| 34201 | gaaaaatgta  | tcgacaaaaa  | gacttgggtac | cgtttcaaga  | agttcaacag  | cagctaaaga  |
| 34261 | tagcattata  | caactttgca  | ggacattcag  | aagaaccttg  | aggggaaaaa  | gtaaaacttt  |
| 34321 | aacgaaaaga  | gaggtgctac  | ttgtttcatc  | cagtagtcgc  | cctgagttag  | gcgaattata  |
| 34381 | ctcgggtgtg  | tttctatttt  | gatcaaagat  | aggaaatttt  | atagtatctt  | tcttaaattc  |
| 34441 | cgcgtctatt  | tcttttctac  | tatggttagt  | gattttttcc  | attaacttct  | cacgcagatg  |
| 34501 | aaaagttctg  | acaataaaac  | atgtggcaat  | cattaaggaa  | gcacataaaa  | gtgcgcattg  |
| 34561 | catgaggctc  | atactgccta  | gcatagctgg  | cagtgcacaaa | caaacaaatg  | gcactatgat  |
| 34621 | agccattttca | agaaatggaa  | tagtgtttct  | tttcattgca  | aaagcagcac  | ctttttttaa  |
| 34681 | ttctgtatta  | tgatgtaagc  | tatattccaa  | aaagcttaaa  | aaggccaaat  | taaaagttaa  |
| 34741 | aaatcctttt  | gttccacaaa  | aaagtgatga  | cttaaagtta  | cttactaatt  | tttttagtagt |
| 34801 | agattttagct | tgtttttttag | tggtaggctc  | agcttggtta  | gtagtgttat  | ttttacaaca  |
| 34861 | ttcacccata  | caatacctcc  | ttgatggttt  | attcttaact  | ataaataaaa  | aactactttt  |
| 34921 | atcaaatcaa  | aatttgcaat  | aaaatgaatc  | cataaatata  | caatcttata  | taaggggaata |
| 34981 | atatggcaat  | tgagaagaca  | ctttcgatat  | taaaacctga  | tgcaagtaaaa | aataatatta  |
| 35041 | caggcaatat  | aaattcctac  | atcgaacaat  | ctgggctgaa  | aatcacagca  | caaaaaatga  |
| 35101 | tgttactaac  | aaaaaaaaca  | gcagagctgt  | tttatgaaat  | tcataaagat  | aggccttttt  |
| 35161 | ttgggggaatt | agtagagttt  | atgacctctg  | gttctgtggg  | agttcaagtt  | ttagttgggtg |
| 35221 | aaaatgcagt  | aagtaaatac  | agacaaatca  | tgggagctac  | cgatccaaag  | caggcagata  |
| 35281 | aaggcacaa   | caggggtgat  | tttgctgatg  | atattagtga  | aaatagagtt  | cacggctcag  |
| 35341 | atagtctaga  | aaatgctcgt  | aaggagatag  | ctttcttttt  | tgctgaatgt  | gagttgggtg  |
| 35401 | agtcaactca  | gattggcgtc  | atccaagtag  | ctgacaacat  | agaaacgaaa  | aaacttgctt  |
| 35461 | gacaccctcc  | gccagccccc  | ttatcatgaa  | actgaagcta  | ttgtattttg  | tttcgccaat  |
| 35521 | ctgcagatta  | aaaggtaag   | attacttaat  | gtatcggcgt  | cttatgttca  | attttttgca  |
| 35581 | gtatatagat  | actgtatgtc  | tttacaacac  | ttcatctaca  | tctaggtttt  | tatctaaata  |
| 35641 | agctgaacgc  | gcttataaag  | cgttacaaga  | catcaaaaaa  | tgccaataact | cgacagagat  |
| 35701 | agtaaaagac  | tagctaactc  | ggggattctt  | tgtctttttt  | tctgcttagt  | aaatttctta  |
| 35761 | aacatttgca  | gcgtaagtta  | gttgcaatta  | aaagcggctg  | aatctcgcct  | gtcaagcggt  |
| 35821 | taaaacataa  | aaaacgccaa  | tatttttaaag | cggataataa  | ccccagggtt  | tcttttgcct  |
| 35881 | tttttttcat  | ttggtaaatt  | tcttaatat   | tatagctaaa  | caacaaccgt  | catcccgccta |
| 35941 | cgtgttagcg  | ggatctatgc  | tttgagatac  | cgcgaatgaa  | tcgcgggatg  | acggtgtaga  |
| 36001 | tgatggttaa  | gtaattcgtc  | atcccgtcgc  | ttgttagcgg  | ccgagatacc  | gcgaatgaat  |
| 36061 | cgcggtatga  | cggttcgcgg  | cagtatgacg  | tagagctcac  | gttagctata  | cttttatgct  |
| 36121 | tacaaactta  | ataaaattcc  | tggatcccag  | tgtctgggca  | ctgggatgac  | aaaggagagc  |
| 36181 | tactcggatg  | ataccttttt  | ctacttagtt  | tgggttatgc  | agaagttcta  | ttataatcag  |
| 36241 | gctttaagt   | tgcggaagta  | attttttgcg  | ttagagtaaa  | aaattttttc  | tatagctaata |
| 36301 | caaagtggat  | caagagaaac  | ttaccacttt  | ctttacaaag  | ggtttgatgt  | taccatttga  |
| 36361 | ctgcctattc  | tgaatttatt  | gaatgaacgt  | taacataaag  | aatctagtct  | atgctttctc  |
| 36421 | taaattgcc   | agtttagggc  | catcatcatc  | acgcagggtta | gttatacatt  | tactccaaaa  |
| 36481 | caaagaaaaa  | gttatgctac  | cacttgcac   | tttgattaaa  | gagctagcag  | atcttataat  |

|       |             |             |             |             |             |            |
|-------|-------------|-------------|-------------|-------------|-------------|------------|
| 36541 | agagtgtgaa  | gtttgcggaa  | atctagatac  | taaatcacct  | tgttctat    | gtactaacc  |
| 36601 | aaaacgtgac  | actaagttac  | tgtgtgtagt  | agaagaattg  | ggtgatttat  | gggcgtttga |
| 36661 | aaaaggaaat  | atatattcag  | gtttatacca  | tgttttggg   | ggcagattgt  | ctgcgataaa |
| 36721 | tggcataggt  | ccaaaagaac  | tcaaccttga  | tactattctg  | aaaagagtga  | cagagtctaa |
| 36781 | aattgaagag  | ataattatcg  | caattaatcc  | gacattagag  | ggtcaagtta  | ctgcacaata |
| 36841 | tataattgaa  | ttgctaaaaa  | atlttgatgt  | gaaaatatca  | cgtcttgctt  | gcggcatacc |
| 36901 | aatgggcgga  | gaaattgact  | atcttgatga  | aggaacgctg  | aggatagcac  | ttacttcaag |
| 36961 | acaagaatat  | gagttaaata  | taaaataaga  | catgtgctta  | aaaaaactta  | tatcgcta   |
| 37021 | aacattcaaa  | aagaaagaaa  | tagcgccacc  | acttaaagt   | gtggcttggg  | aaaatgaccg |
| 37081 | tctaaactat  | aagcaatttt  | caggtaaatt  | taacaatata  | attaaaacaa  | ttgatcagtc |
| 37141 | ttttacaata  | atatcttttg  | aaggatatga  | tggatggggc  | aagacgtttt  | ttttgaaaga |
| 37201 | atgggtaaaa  | gagttaaaac  | agcaaatga   | aattgcagct  | tattatagt   | catgggat   |
| 37261 | caatgcattg  | gaccaaccac  | tgccttcttt  | tttaaatttc  | ctatttgaag  | atttattt   |
| 37321 | atcgtataaa  | gtaaaaagaa  | gtgttataca  | acagttcaag  | aacataaacc  | aagagctatt |
| 37381 | ttctctaaac  | acactaggaa  | agctgatcag  | taaatctcca  | cttgctatgc  | tttcagtatt |
| 37441 | tcttgatgct  | gcaaaagagg  | ctgataaaaa  | agacataggt  | tttgtcttga  | gtgaattaag |
| 37501 | tcttctccaa  | agaagaaaag  | agagtactag  | agatttttaa  | acacagttag  | cggatgtgg  |
| 37561 | taataaaaatc | agaaaagaca  | aaaacattta  | tataatgggt  | gataatcttg  | atgtgtgcc  |
| 37621 | tcctaaattc  | gttgtcgatt  | ttttggaatc  | tataaagtat  | atgcttgatg  | tggaggggct |
| 37681 | ggttttcatt  | attcctgtaa  | gtaaagataa  | gagtaatgta  | caaagagcaa  | tcagcacaat |
| 37741 | acttggaacca | aattttgacc  | taaaatcttt  | tactgatctc  | tctttacatt  | tgccaaaaca |
| 37801 | accgatagaa  | aaattttacaa | aagaactatt  | tgaatatt    | aaattaccga  | aaaagtcaaa |
| 37861 | aaatttgatt  | gtagatagtt  | ttatatattt  | tgcagaaagc  | ctgtcactat  | cgttaaaaac |
| 37921 | aatagaatac  | tgcgtaaaaa  | aaataaagct  | gtgtcttctg  | aatcacacaa  | gagaagaatt |
| 37981 | acctgatccg  | aatttgtttt  | catttttggt  | aatactgcaa  | tcgataaata  | ttgatata   |
| 38041 | tgaggaatta  | ggtttttcat  | atcaaagagc  | attggaaaaa  | attgaaaatg  | aatataaatc |
| 38101 | tttagttcta  | aatgggtcaag | aagaatggga  | aaaacttaaa  | acctctctag  | aaactgcttt |
| 38161 | tgcagagagg  | gagtcaaaaa  | ttaacaaagc  | tataaaggat  | atactatttt  | gaaaagatac |
| 38221 | cctaccttca  | catatacaaa  | gatagggtaa  | catttgatta  | acgccctttt  | actatgtcat |
| 38281 | taccttgttc  | aaactttctg  | attaattcgc  | ttacattgac  | attagataat  | tttttacctg |
| 38341 | cagatttgtc  | attatgtgaa  | gcatcagggt  | tacgaagggtc | ttccttactg  | ttactcctag |
| 38401 | taatattaca  | tctaacaatg  | tttgaattat  | tagacttatc  | gcttacatct  | gaaatattgc |
| 38461 | ttttttcact  | acatgaagac  | gaattactcg  | acatattgcc  | taagctaaag  | agctttttac |
| 38521 | cttgatagat  | tggattccaa  | tcaagtggat  | tataagtttt  | tttgctagtc  | tcaacctttt |
| 38581 | ggttattttg  | ctgttttagga | gaaaaaccaa  | gtttttctct  | ttctttcttg  | cttagcgttt |
| 38641 | tgagaaat    | tacggtttct  | aattcatcag  | ttgcttgtag  | tttatgtaaa  | tcaaagcttt |
| 38701 | tttgatgggt  | atcctgctta  | acattttcca  | tcatatttatc | ttttattggt  | ctatcctcat |
| 38761 | catcagaagt  | gctgctacta  | atatcactga  | taccactatc  | ccctgaattg  | cggcgttggt |
| 38821 | tgtaggaggt  | gctatgaatg  | ttgtcttcca  | tgagtttttg  | cattgttggg  | ccaaatgttc |
| 38881 | ttccaagatt  | gctactcact  | gtttcattac  | tatcatttgc  | ttgagaatga  | ggtacatttc |
| 38941 | gtcaaaaat   | tgtttttatt  | ccagcaaatt  | tagcttggga  | agatttcgga  | ggaacagggt |
| 39001 | gggcaacat   | gccttttgag  | ttaatctttc  | cttcattttg  | aggaaaaatt  | tttggtatt  |
| 39061 | ttttttctac  | tgtagtattc  | atltttttac  | ctctaaacct  | attaactaat  | aaaagtataa |
| 39121 | acttagagggt | attaattttg  | taataacaat  | gctaatagat  | taccgcaggt  | tcaataagca |
| 39181 | tcaccagagg  | attctctata  | taatgcttaa  | aggcatttaa  | aaactttgct  | ccgagtgc   |
| 39241 | catcaactgc  | tctatgggtca | acagagagcg  | ttactgtcat  | tattttctgct | gtttctat   |
| 39301 | tctcattcat  | aacaattgggt | tgttttttag  | atgcaccaac  | tgccataatg  | caagattg   |
| 39361 | gcggattgat  | tatagcactg  | aaggctttta  | taccaa      | ccctaagttg  | gagatagtaa |
| 39421 | accctcctcc  | ttgaaactct  | tcaggtttca  | atlttccaga  | tcttgctctg  | cttactaa   |
| 39481 | ctttcacttc  | ttttgatata  | gataaaaatac | cctttttatc  | agcatttttt  | actatagg   |
| 39541 | taattagccc  | atcttcaagt  | gccacagcga  | ttgagatatac | tacattcgag  | tatttaagta |
| 39601 | ttttattatc  | tatccacgaa  | gaattttatat | caggaaaatt  | tttcatgcta  | aaagccacag |
| 39661 | ctttgataat  | taagtcat    | attgttactt  | tattgttttc  | atctgctgag  | ttaatctcgt |
| 39721 | tttttaacga  | tattaaactta | tcaacctggc  | agtctacagt  | taaataaaaa  | tgtggaacat |
| 39781 | tctgttttga  | ttcagtcagg  | cgctgtgcta  | tcacttggcg  | tatgttgctt  | acttcaacta |
| 39841 | tctcaggact  | ttcagtatgt  | ataccactgc  | ctaaaaactc  | caacacatca  | gccttaatta |
| 39901 | tgcgaccgta  | tggctcctgta | cctttttaatt | gctgcacatt  | aacccttcca  | ttttgagcta |
| 39961 | ttttcttagc  | taatgggctt  | atlttttattc | taccttctgt  | tgtcttagta  | tcttcttctt |
| 40021 | ttctagatcc  | cagtggtcaag | cactgggatg  | acattgagag  | gttggattcc  | agcgtcacgc |
| 40081 | gctggaatga  | caccgaagaa  | tgacttattg  | gctttccggt  | taaatcttgg  | tgttctgatt |

|       |             |             |             |             |            |             |
|-------|-------------|-------------|-------------|-------------|------------|-------------|
| 40141 | tttgattatc  | aacagcacat  | tttgtcactt  | cctttttaac  | tgcactattg | atggaagttg  |
| 40201 | aggtatagtt  | gttaagtgca  | ttttcatcct  | ccccttcttc  | cagcattaaa | gctattggtt  |
| 40261 | gatttacagg  | cacgccactt  | gttccttctg  | ttactaaaat  | ttttgctaca | actccttcat  |
| 40321 | ctacagattc  | aaactccatt  | atggccttat  | cagtctctat  | ctcagcaatt | acgtcgccta  |
| 40381 | cttcaacttt  | gtcttggttct | tttttatgcc  | actttacaat  | ttttcctcca | gttttgctca  |
| 40441 | ttgtcggtaga | aagagcaggc  | attaatat    | ctataggcat  | tgattttgca | tttaaagatc  |
| 40501 | tattcaat    | ttaat       | ctttatctta  | tgtcaaccta  | atcgtgaatt | atgatgaata  |
| 40561 | agtctgttac  | actatccctc  | acgttatccc  | agtgcgtgac  | actgggatct | tggttcagta  |
| 40621 | ctattatcct  | attgttttta  | ttatttagcc  | atagcttggt  | tgctaacaac | tttgtttcaa  |
| 40681 | ccaaatcaaa  | taagatcaac  | atgagaacgg  | ggccagggtt  | tcactatcct | gtaaaatgga  |
| 40741 | tatacacttg  | caaaaatctg  | cccctgaaag  | tgatagaaga  | gtttgagagt | tggaaaaagg  |
| 40801 | tctgcatat   | agatgaagac  | tgcggtatgga | taaaaggcaa  | tcttcttagt | gataagcgt   |
| 40861 | acgcgattgt  | aaaagaagat  | acttatggat  | atcaaaaaca  | gagtgtagac | agcaagatta  |
| 40921 | ctataaaaat  | agacaaaatt  | gttgtaatga  | aaatagaaaa  | gtgtaacgaa | gagtgggtgt  |
| 40981 | ttctttctac  | cccaaaacgc  | aaagcatggg  | tacaaaaaaa  | acatatatat | ggggttgatt  |
| 41041 | aggttgacaa  | aagatctgaa  | ttaacactag  | tttctaggcc  | ttctgtagca | tgctcttcat  |
| 41101 | gtgaagcaga  | ggatggcact  | gacttcttca  | tgctctggag  | actgtacagg | gctatcacag  |
| 41161 | aaactcctta  | acatctcctc  | agcggtatgaa | tctaaaattt  | gtacaataga | cttttcactt  |
| 41221 | tgttctctta  | gcgattgatc  | cactctagaa  | atcaactcag  | aaaactcgct | acctgatttt  |
| 41281 | tcagcttcac  | tttttat     | actttctatg  | cttgcaatat  | taccttggtc | aatttcttct  |
| 41341 | tttgttatgt  | tgaacgaatt  | tgcagcatct  | tgatatccaa  | tcttgcaatt | tccacaacca  |
| 41401 | attatgcaaa  | aagcaatgga  | attagatat   | tcgcttgag   | cccacttatg | tatagcgtaa  |
| 41461 | gccaaataat  | tgtcatggta  | tttaatgcta  | aattgttggt  | ctattagctc | agaaatttta  |
| 41521 | ttcttttagag | acataaagta  | ccctccttac  | attcggtata  | cctttttggt | aagatacagc  |
| 41581 | aattacacca  | tttactacat  | gctttacttt  | aattaattat  | taaaacgaga | gcataatttt  |
| 41641 | cagagttata  | tctttttacc  | ttaacaattc  | ttttttgagt  | tcctcttcaa | tcacttagt   |
| 41701 | taaactcgtg  | tcaaactcac  | tcctcgaaaa  | atccctaacc  | tccccgggat | catatcgatt  |
| 41761 | tcctatcatt  | ttttcaatag  | catcatttat  | tatgtttatg  | tcaaatccct | ttataatagg  |
| 41821 | cgttaccttc  | acctgccctg  | cagagccttt  | accataaatt  | cttttgcttt | tatcaatgca  |
| 41881 | accacctgca  | ccagggtttac | tgcttccaaa  | acccttgcta  | cactttactg | tttcatgctt  |
| 41941 | gatttcacca  | ttttctatat  | atattat     | attatcttca  | gtaaccgcga | atcctgttgt  |
| 42001 | tgtggttttt  | tcttttaatt  | ttacactatc  | atcaattatt  | ggttcgggat | aatccttata  |
| 42061 | ctcatatatt  | ttatagatgc  | ctccgcctcc  | catagtgatt  | aaatacttgc | actcttgttt  |
| 42121 | acctaaacga  | cactttctta  | taaaaatagg  | accccatcc   | ttatctgtat | attccttttc  |
| 42181 | cctgttacct  | cctccctggt  | caactttaat  | gttaattata  | ggataatcaa | gatcaatttc  |
| 42241 | caattcagct  | ttaatataat  | ctcctggcat  | tcctactcta  | ctttcagtg  | aattaggtgt  |
| 42301 | gtaagtgtaa  | ggtgtatctt  | ttatgtgacc  | tgcttcacca  | catccccaca | cttctatttc  |
| 42361 | aacacggcta  | gatgttat    | gtgagccatc  | cacatcataa  | tctccacttc | caaaaacatg  |
| 42421 | ggacttttctg | ctcttttttt  | ccggttcttg  | tttctctttt  | tccagttggt | tctcgattat  |
| 42481 | ctcttttaac  | ttctctttga  | gaccttctaa  | atcgaaaccta | cacaatttat | cagcgtaaaa  |
| 42541 | gacctccgtt  | ctgtttgctt  | taattgggtgc | ttcttggtgt  | gtgacaacgc | catttgtatt  |
| 42601 | ttgtgaaatc  | tttgtataaa  | aaggttgagt  | gttttctttg  | tctacatata | gtgttgaaacg |
| 42661 | gctgcatggt  | ccagtaaagc  | agatacaacc  | atcatcacct  | tgattacatt | tttctctatg  |
| 42721 | ctctacatcc  | gtcaatttgt  | atactacttt  | cagtccttta  | ctagatttaa | atgtatcgctc |
| 42781 | tatctcatca  | tttcttttta  | cacagtaact  | gcattctctc  | ttcttctgct | cattttcatc  |
| 42841 | aggaagaaa   | acataaccctt | gtttattgaa  | tattatttta  | tctaactcac | tctgatctct  |
| 42901 | gtttaagaga  | tcggctcttt  | tattttcctt  | gcttggaaga  | taatagaact | gatttgattc  |
| 42961 | cttgaggtaa  | acagcattgt  | atttagtata  | tcttggtccc  | attaatttta | gtggtattat  |
| 43021 | tttattttct  | cttttaagaa  | caaactcctc  | tggttctggc  | tgccatccag | aaagacaaag  |
| 43081 | cattttactg  | ttagaatttc  | ctttataact  | tacttctatt  | tccggtgctc | cagagttatt  |
| 43141 | aaattccat   | tgaatagatt  | tgtcttttaa  | ctttttctca  | aatcatttaa | aactataaaa  |
| 43201 | acttccgcct  | ttagaacatt  | taatttgac   | atcaggaaca  | tagccatatt | ctttcagaac  |
| 43261 | tttaaattgt  | tgcggtattac | tttctaatat  | accttctata  | atattatcaa | tattactatc  |
| 43321 | agttgttttt  | gctactattg  | ctggttttac  | tacttttaaa  | gatagggggc | caatgtttat  |
| 43381 | aggatgggtg  | aggtcagtat  | taacattaaa  | agtacaggaa  | ccattactat | aggttccatg  |
| 43441 | tgcttttagca | caagtgtctc  | cactcatctt  | catttctact  | ttcaatgtat | ttttatttac  |
| 43501 | tatctccact  | atctcaggtt  | ctggagcagg  | tggtgcagga  | aaacagcgga | cgaactgtgg  |
| 43561 | attttgttca  | tttatacttt  | gagttccaag  | gtattcagca  | cagagctggc | ccttttttct  |
| 43621 | ataggttttg  | aagtaatagt  | gagtatcctt  | atctgtaaca  | gtatatgagt | gatttggaat  |
| 43681 | gttctcatta  | tttgaaacaa  | cgtgtggaaa  | acctaactct  | tttctttcct | ccagtccgct  |

|       |            |             |             |             |             |             |
|-------|------------|-------------|-------------|-------------|-------------|-------------|
| 43741 | aattatcacc | ccaactcttg  | gatcgaagta  | atcattatct  | tcatttggtta | taggaacaat  |
| 43801 | tctaacttgt | ggaggtgaca  | tcgcaagttg  | ttcacagaat  | ggagggggggc | taggtgcaag  |
| 43861 | tggcacagga | gcacatttta  | ctgccgtttg  | gtagcaggta  | tcacagactt  | tttccatctc  |
| 43921 | cccaggacgg | aaaatatctt  | cacccgaaaa  | tactctagaa  | ccccatgaag  | aaattcctga  |
| 43981 | catacaagcc | cctttttgac  | tgcaagcaca  | tatttttagga | gagttagcga  | atcttctttt  |
| 44041 | ttcctcatca | gtaacaccgt  | ctgcccattc  | ccatttaaga  | ccccgagcaa  | tttctcctcc  |
| 44101 | agcttttgtt | ttatctcctt  | cccagtcgat  | aaaagctgca  | gcagaaactc  | cagctcctgt  |
| 44161 | accttgcgtt | ccatatactt  | ggcggcagga  | ttccccactt  | tgtaagtcac  | aacaataact  |
| 44221 | ttgtccatca | taagcacata  | ctctaatttt  | gggattaaag  | taaccatcaa  | ctccttgatc  |
| 44281 | ttttattgct | tgcaccttaa  | tttcctttac  | ccaatctcca  | ccaactattg  | cttccaacca  |
| 44341 | agtattactt | tctacaaatg  | ttggacaatc  | agcatatcct  | tgatacgaaa  | gaccaagtat  |
| 44401 | caaaaaaaaa | atcaataaga  | aattaagcct  | tacacttctc  | ataaaaatacc | ggtaaccact  |
| 44461 | cattaacttc | ttctcctttt  | tccttttattg | cctcgtacat  | atactttatc  | gtctctttgt  |
| 44521 | tagctgaaag | tacatgtatt  | tcttgcatac  | tctttaaatc  | taaattttaa  | gttactaatc  |
| 44581 | ctttatactg | ttttatcaaa  | aataaacctt  | cctgcgttgg  | cgtctgcaga  | attatattca  |
| 44641 | gctcctcttt | tgataaagaa  | aatgctttca  | tgtataatct  | atgttcattg  | acgttcggca  |
| 44701 | tcaagattct | tgtatcaaca  | tgtttatcta  | aatattgagt  | aaatttgcta  | gcaaagcgca  |
| 44761 | gatttaaatt | ttcagttact  | aggattacta  | caacatttag  | ttccgtcatt  | ctttgcatcc  |
| 44821 | agttatcaaa | ctctttctct  | gtaggaaaaa  | tattacttat  | ctcccatgct  | tcacccaaaa  |
| 44881 | caagtattgc | aggcgagcca  | tcacattttg  | cctcaaaaaga | atataaaaaa  | tagtaaagta  |
| 44941 | tcacggacat | acattccttt  | tgttttgtaa  | ggtttgcggt  | gttgagagat  | ataatttttg  |
| 45001 | tttcccagtc | aatatctgat  | tcattaccat  | cttgaaataa  | gtaagcaaag  | tcaccatcgt  |
| 45061 | cacaccatct | acttatctta  | cccccaagga  | gcaagagcac  | ctcagaaatt  | tgtgaaatag  |
| 45121 | aacgtgattc | cttggttata  | gcaaataatag | aatccacaat  | ttttcttatc  | ttttcttcta  |
| 45181 | cgtccaccaa | gctcgtatcg  | gctaccattc  | ttctgatcag  | ttcaaccaac  | atattgcatc  |
| 45241 | tggaagcact | atcttcaatg  | tttagtggtt  | taaatttttag | gcttttgtcc  | ttatatattg  |
| 45301 | gatcgattat | gtaatatatta | ccactcactg  | ctttagttaa  | aattattgat  | tttccagtgt  |
| 45361 | tatccaatat | gacaattctt  | gggttaaact  | ttcttgattc  | tgataataga  | aaattaatga  |
| 45421 | gtgaagttct | gcctgaattt  | ggagctccga  | gtatcgtagt  | atggccatta  | tttctttttc  |
| 45481 | catgaaaatt | aaagaagtaa  | ggatttcctt  | tttttgagaa  | aaaaatcatt  | accgcttctt  |
| 45541 | tccaccttct | tcctttttaat | gtacctgacg  | taaaatcgtg  | cagcatagca  | aagctgcaag  |
| 45601 | cgtattttgt | taagatatatt | ttcggtttgcg | taataaaaagc | aaaattgcct  | ggaagtgtgt  |
| 45661 | cccaaaaatg | actttccata  | tgtaaatacag | ttctaaacat  | catgaagcca  | actaatgaca  |
| 45721 | ttatagaaga | taaatcacta  | atactttcag  | ctaacttatt  | cctatcatct  | gcaaataattg |
| 45781 | taaaaataat | tttctgttgg  | cagaagtcta  | tactagaggt  | cttttcaagc  | tctattattt  |
| 45841 | cttcaattcc | tgagctttta  | agtaagggtt  | tatcctcact  | aatttgcagc  | atgttgattt  |
| 45901 | gtttttttaa | ttctttttatt | gctttgttat  | tactagttaa  | tatcattatt  | tctgtaatga  |
| 45961 | taaattcaga | ttcaagctgc  | aagcatctat  | ctatattacc  | taaagagatt  | tcccgttatt  |
| 46021 | cttttatgct | gaaaatagag  | ccaaattttct | gttgattttc  | aaatattggt  | tgaaacgtat  |
| 46081 | tgaaacccaa | agctatttta  | aaattttctaa | tatattgcga  | caggtccctt  | tcattgtattg |
| 46141 | gataatcttt | gtgcgttaat  | gtaacaatat  | agtggagaaa  | ttctatcatt  | tcagaatata  |
| 46201 | ttttaccttc | actaaacctt  | agactcagtt  | ttttagctcc  | aaaaggctct  | aaatcatttt  |
| 46261 | gaattacgtc | agttatcttt  | tgcaactcct  | gatggctttc  | ttgtaaagac  | aacttatgct  |
| 46321 | tattctttat | tctattgaaa  | aaaaacgaat  | tattagtatg  | cttgccaaaa  | tcgctaaaca  |
| 46381 | atattacaat | gtatagttca  | tttatatact  | gtaattttact | atcagttagt  | ttattaaacc  |
| 46441 | acgttgaatg | taggttgtca  | gagaagtctt  | cagttttatt  | ccatttcaag  | ctcagtttat  |
| 46501 | tgcgctttct | aacggtatga  | atccaaacgg  | taaaacacag  | gctattaata  | ttttttgata  |
| 46561 | tgctttttct | aatttcagtt  | ctgaggtcgc  | tgtagttatc  | aacagaagaa  | taatcttcta  |
| 46621 | acttgattat | ttttaacaat  | tctccctggt  | ttgttagtat  | ggtttcttca  | tcgtaatgac  |
| 46681 | aagcataagg | aacaaaatct  | aatcaatgc   | tttctagtaa  | tgctaagttg  | ttcttttttt  |
| 46741 | taagcttaga | gttaactgtt  | ggtactttta  | actgcatatg  | cgtattcaat  | aaagataatt  |
| 46801 | aaaaaagata | aaaatactat  | cttaattttt  | atcttttttt  | tcgctatcgg  | attgtaattt  |
| 46861 | tatatctttt | gcaaagttaa  | atttttcttt  | taagtagtct  | gttgcccttt  | ctgtactacc  |
| 46921 | gaacatcagg | accagtacac  | caaacattat  | cataaaaaag  | attagacctc  | tgaacactac  |
| 46981 | tgcaagtatc | actgcagcta  | tacacaaccc  | tatgattggt  | gaaggactca  | tattttctac  |
| 47041 | agtatcttta | actgaaaatg  | aagaaataaa  | atttttttacc | gtttcttgta  | taccctttaa  |
| 47101 | ttcatcactc | gccgaacttg  | cttcgcctaga | atatgatgca  | aaaatgaaac  | ttaataaggc  |
| 47161 | tataaaaacc | aaaactttat  | tcaattgaat  | gcgcacatca  | taaacacctt  | ttaaacattc  |
| 47221 | ctcaaatata | acaactttta  | tatcaatagg  | caagaactga  | attcacttat  | ccactacaag  |
| 47281 | taacacatat | ttaatttttta | ccgctgtgaa  | catgctgtaa  | gctcttatca  | tcaacaagag  |

|       |             |             |             |             |             |             |
|-------|-------------|-------------|-------------|-------------|-------------|-------------|
| 47341 | gactcacatt  | aatggatggt  | aatttacttg  | ataggaagtt  | tgaatgcaat  | tcagctactg  |
| 47401 | ctgctatagc  | aagcactgca  | accatagcaa  | gtagtcctgc  | tcctatcaat  | cctgatgtca  |
| 47461 | ttgctcctgc  | aacaatgcac  | cctattgtgg  | agagagcaca  | acctgctaca  | agtgcacagt  |
| 47521 | gaagatttct  | gttattgggt  | tggtttttaa  | gtaggatata  | tttcttaact  | tgatctggat  |
| 47581 | ttgcttgacc  | atctgagttt  | tcattttctt  | gcatttttgg  | ctcttttttt  | acagtctgct  |
| 47641 | ctggctgcac  | ttgagtctcg  | ttttcttttg  | gggattccaa  | atlttgattct | aataactcag  |
| 47701 | ttttttctcc  | accctctggt  | tgtaagccat  | tatctccttc  | aacagagctc  | aatgttgagt  |
| 47761 | ttaaactttc  | ctcagatgaa  | gtgcttggtt  | ctaaagttaa  | actgctcctt  | ctgctactta  |
| 47821 | ctgggtgattt | caaactttct  | ttactcgttc  | taggtgagtc  | tattccacta  | tctgagtcac  |
| 47881 | tgccactact  | gagtttagaa  | gttttcttct  | cctctatttc  | tttcacaacc  | ttgctatatt  |
| 47941 | tttcaaacac  | ttcctctgca  | acatctgaat  | tactaagtat  | tttattatca  | ccactttttt  |
| 48001 | tctcagctac  | attcaagggt  | gtttcttggt  | tgttgttttg  | ctcttcaata  | tgtttttagct |
| 48061 | gcatttgatc  | ttcaatat    | tcttcaacag  | catttggtat  | tgagcttaca  | ctgctgctcc  |
| 48121 | tgtagtaaat  | atccaaaatt  | gtttttacta  | tttttctctt  | tattgtttgt  | ggcttttggt  |
| 48181 | attgttctct  | ttcattgtta  | aatactgtag  | gtacagctag  | ttcttctgat  | tttattactt  |
| 48241 | catctttcaa  | tgcaggaaga  | aagttttcga  | tataataact  | ataatgtttt  | tgatattcct  |
| 48301 | cttgtttttc  | tggtgatttt  | tctaattggt  | ctctcagcga  | tttttcta    | tcagttaata  |
| 48361 | cctcaggact  | agctccttcc  | ttgaacaact  | ctatgcattt  | tttgatagtt  | ccatctccct  |
| 48421 | tttggtgggt  | tccatat     | tgattttctt  | ttgttacctt  | tttgatatata | gtgtcgtgca  |
| 48481 | attgttggtt  | aatatctttt  | ttagaactta  | gcatagactc  | ctccatacat  | aacaaaatgt  |
| 48541 | atagatacct  | ctttagcgtt  | aattttacat  | taaaactggg  | caattatgcc  | atattataaa  |
| 48601 | taattgcggc  | aacttgctta  | ttggaaggtc  | gcttaactat  | ttgctttctg  | ggctttctac  |
| 48661 | ttctacagat  | ttgctattaa  | tatgattctt  | tgcttggtga  | actaacatat  | tcactacttc  |
| 48721 | ttttacaggc  | ttttccctat  | caaccatgcc  | aacactttgg  | ccagccatta  | gagatcctgt  |
| 48781 | ttcaacatct  | ccatcaatta  | ctgctcttct  | taaagctcca  | gccagaattt  | tttctatttc  |
| 48841 | aagctgcccc  | tcttcttttg  | agatctggcc  | cttttggtat  | tcatcaataa  | cttctttttg  |
| 48901 | acgcttcctg  | aagtcacac   | ttgctttggt  | ggctatagct  | cttacaggaa  | ttacaggaaa  |
| 48961 | atcagcactt  | atctgtacag  | aagggtattgc | attacgtgcg  | gccgatttaa  | taaacacttc  |
| 49021 | cttaaaat    | ttgtgggcaa  | ttgactcatt  | agtgcagaca  | aataatgtgc  | ctatttgaca  |
| 49081 | gccacttgct  | cccatttcta  | agtaattaac  | tatcacttcg  | cctctgccta  | ttccacctgc  |
| 49141 | aacaaacact  | gggtatttggt | cattttttaa  | atgaggcaat  | atctcttggt  | caagaacaga  |
| 49201 | agtgtcact   | ggacctatat  | gcccacctgc  | ttccattcct  | tctattatta  | atgcatctac  |
| 49261 | tcccattttt  | actaaccttt  | tcgcaaggct  | taatgctggg  | gcaaagcaca  | taactttaat  |
| 49321 | gcctgcaccc  | ttgatttttt  | ctatatagg   | ctttgttggt  | agtccaccgg  | caagcactat  |
| 49381 | atggctcact  | ttcgtttcaa  | tacacacatc  | tatcaactca  | ctcaactttg  | gggtgcatagt |
| 49441 | aattaggttt  | acaccaaatt  | gcttggttagt | taatttttgt  | gtctctatga  | tttctttttc  |
| 49501 | cagtaagtct  | gggaacattg  | caccacatgc  | aatcacacca  | aaaccaccag  | cgttttgagat |
| 49561 | tgctgagacc  | aagtttctct  | ctgaaaccca  | gctcatagca  | ccaccatta   | tagcaaactc  |
| 49621 | actgccaaga  | aaatctgttc  | cttttttcca  | gaggctactt  | aacatataac  | ctatatcata  |
| 49681 | cgtttaaaaa  | tgttttgctt  | atctataaat  | gtgtgcttca  | aagcgccaag  | tatatgtaa   |
| 49741 | attataaaga  | gtaccataaa  | atatgcaagc  | atcgaatgta  | gctcgtttagc | cgtgttagct  |
| 49801 | agatctttgt  | tttgattaat  | caacaaagg   | atatggaaaa  | aatatttgat  | ctgtttgcca  |
| 49861 | gaagcagaag  | acatgacata  | gccagatagt  | ggcattagca  | ccattaaaga  | atacaaacca  |
| 49921 | aagtgcactg  | ctttacttat  | attgattaca  | aaccgagaaa  | aatttgctgg  | aagtgggtga  |
| 49981 | acataagtaa  | agacgcgaaa  | aatatgcgt   | actatgatta  | atccaagaat  | agtgataccg  |
| 50041 | caagccttat  | gaatagcgta  | tatgttgaa   | ttaat       | tgctaagtgg  | taagcttttc  |
| 50101 | atataaagtc  | cagagcaaag  | cataccgata  | ataaaaaacag | ccatcaacca  | atggataact  |
| 50161 | cttaaaccta  | ggctatat    | attgtcttcc  | at          | ctctaaagta  | gcatttatat  |
| 50221 | aatagaaaaa  | ctatttttca  | atcaaaatta  | ttaaagcaat  | ttagattttac | caacaatgta  |
| 50281 | gctatacaaa  | ttcgacccag  | ccggaagtca  | agggcaccta  | aatcaagaaa  | cggattaaac  |
| 50341 | gaaaaactta  | cttgacaccc  | ttcgccagcg  | cccttatcat  | gaaactgaag  | ctattgtatt  |
| 50401 | tgctttcgcc  | aatctgcaga  | ttaaaaggta  | aggattactt  | aatgtatcgg  | cgtcttatgt  |
| 50461 | tcaatttttt  | gcagtatata  | gatactgtat  | gtctttacaa  | aacttcacat  | acatctagat  |
| 50521 | ttttatctaa  | ataagctgaa  | cgcgcttata  | aagcgttaca  | agacatcaaa  | aatgccaat   |
| 50581 | actcgacaga  | gatagtaaaa  | gactagctaa  | ctcggggatt  | ctttgtcttt  | ttttctgctt  |
| 50641 | agtaaatttc  | ttaaacattt  | gcagcgtagg  | ttagttgcaa  | ttaaaagcgg  | ctgaatctcg  |
| 50701 | cttgtcaagc  | gttttaaaaca | taaaaaacgc  | caatat      | aagcggataa  | taacctcagg  |
| 50761 | gcttcttttg  | cctttttttt  | catttagtaa  | at          | tatttatagc  | taaacgacaa  |
| 50821 | ccgtcatccc  | gctacgtggt  | agcgggatct  | atgttaaagg  | atagtagggg  | atctatgtta  |
| 50881 | agagataccg  | cgaatgaatc  | gcggtatgac  | gggtgaatga  | tggttaagta  | attcgtcatc  |

|       |             |             |             |             |             |             |
|-------|-------------|-------------|-------------|-------------|-------------|-------------|
| 50941 | ccgctgcttg  | ttagcgggat  | ctcttgtag   | cgccgcggca  | gaatgacggt  | tcgtagcggg  |
| 51001 | atgacgggta  | agcaatgtt   | catcccacta  | cgtgttagcg  | ggatctcttg  | ttagcgtg    |
| 51061 | ggcggtaga   | cgggttcgtg  | cggtagacg   | gttaagcaat  | ttgtcatccc  | actacgtgtt  |
| 51121 | agcagctaag  | agataccgcg  | aatgaatcgc  | ggtatgacgg  | tctgcggcgg  | tatgacgggt  |
| 51181 | cgtggctgta  | tgacggttcg  | cgcggtggca  | tgacctcgtc  | atcccgcctac | gtgttagcgg  |
| 51241 | gatctatgct  | ttgagatacc  | gcgaatgaat  | cgcggtatga  | cgggtgtagat | gatgggttaag |
| 51301 | taattcgtca  | tcccgcctacg | tgtagcggg   | atctcttggt  | agcgccgcag  | cggtagacg   |
| 51361 | gttcgtggcg  | gcatgacgat  | aagggtccag  | tgtcaagcgt  | ttggcatgca  | aatttcctta  |
| 51421 | aacgttcgta  | agcttaaaac  | tttacttttag | atcaaactgc  | tgtatagtga  | ctttatagct  |
| 51481 | ttagttttac  | aatgagtata  | cctagtatatg | aaaattgtga  | tcttcacaat  | aaagccgtct  |
| 51541 | tactcagagt  | tgacttcaat  | gttcctataa  | aagatggaga  | aattcgtgac  | gtcactcgta  |
| 51601 | ttttgagagc  | attgcctact  | attcagtatt  | tagtgaatgc  | gagtgcaaag  | attattatta  |
| 51661 | tatcacatth  | tggacgcca   | aaggccagag  | acaataatct  | gtcgctaaaa  | aatgtaattg  |
| 51721 | acactttatc  | gcagttacta  | aataaaaaag  | tgaaattcat  | tgacgattgc  | tttggtgaaa  |
| 51781 | aagtacaaag  | agcagtaagt  | gttatggatg  | caggagatat  | aatattacta  | gagaatctaa  |
| 51841 | gattttataa  | agaggaagag  | caaagtgact  | caaattttgc  | caaacaacta  | gcatctctag  |
| 51901 | cggatatata  | tgtaaatgat  | gcattttctt  | gctctcacag  | agctcacgct  | tctatttcac  |
| 51961 | gcattacaga  | atthtttacct | tcttatgcgg  | gatttttgctt | gcaagatgag  | ctaaagtatc  |
| 52021 | ttgaaaaagc  | tgtatcatth  | aaagctaaac  | ctattactgc  | gatagttggg  | ggagctaaaa  |
| 52081 | tatcaactaa  | aataaaagt   | cttatgaagc  | taacagaaaa  | ggttgattac  | ctagttctag  |
| 52141 | gtgggtgcaat | agccaataat  | tttttgatcat | ttagcaaaag  | aaatatagg   | aaatctttct  |
| 52201 | ttcaaaatgg  | tgttgacgac  | cttctacata  | atattgttga  | aacagcaaat  | aaaaacaatt  |
| 52261 | gcaaaatagt  | tgtgccagaa  | gacgttctgg  | ttgcagtaaa  | ctctgattac  | agcactagta  |
| 52321 | tttcaagaag  | aactgagtc   | atthttggacg | gtgatataat  | tttgatatac  | ggaccacaaa  |
| 52381 | ctttgagtag  | aataagcagt  | ataatagcaa  | gcagtaagac  | tctgctgtgg  | aatggaccta  |
| 52441 | ttgggtgttt  | tgaacattca  | gcttttgcaa  | gtggtacaat  | aggggtaatg  | aaaatcgtaa  |
| 52501 | gtgacttaac  | gcacaaagga  | aagttaacca  | gcataatagg  | gggaggcgat  | agtctatctg  |
| 52561 | caataagcgc  | tgcaggcctt  | accgataagg  | atthttacata | tgthttccact | ggtggaggag  |
| 52621 | cattthttaga | ttgggttaagt | ggcgatgaaa  | tgccgggagt  | tgctgctctg  | caaaaacgat  |
| 52681 | tagattaaaa  | ctthttttaa  | ttatttctta  | taggctagct  | ttthttgtgaa | cgtgattatg  |
| 52741 | tcgaagacag  | ttaaactaat  | tttggtgtta  | ataataccaa  | taataggatt  | tattthttat  |
| 52801 | attaaggatc  | attattthtca | caccggctat  | gtagaagaaa  | atgthtgaagt | caattthtgaa |
| 52861 | ccattthttca | gttcacaacc  | agccaccgth  | tcagaattaa  | ctgacttcga  | tagaggagtg  |
| 52921 | ttgaaagtht  | gtggagattg  | gggagcacat  | ccagataaaag | aagattthcaa | aattthtactt |
| 52981 | agthtgcgc   | agcatcaaga  | agtagtgaaa  | ggaatatata  | agtgattacg  | ccagatgcgg  |
| 53041 | atthtgagth  | acttaaagat  | gaactggcta  | acattthggt  | tacaaatagt  | gaaagtgaaa  |
| 53101 | aagaaactat  | agggthttgga | catatthttt  | gtggtgagcc  | aaacgataaa  | ctaggtggta  |
| 53161 | tgcatthttgt | aggtagatat  | gttgaagctc  | aagaagataa  | atgggcagggt | gcaatttgga  |
| 53221 | atgataagtc  | cctatgcaat  | aatcagata   | ttaaagccgc  | agthttatata | tttggaatga  |
| 53281 | aatatthtag  | taaggatggg  | gaagtgaag   | ttaaatgccc  | aatggatac   | gcataataacc |
| 53341 | ttcatgcca   | taattthctgc | aactaagggt  | tttaagggaat | taggaaaaga  | tggaaatgtgt |
| 53401 | ctatatgaaa  | tggaaagatga | cgattatcaa  | tcagtgtttg  | taagaaagaa  | tgatgctata  |
| 53461 | ctcacgttht  | atcctgactt  | aacaccaaaa  | tgtgatgata  | agagtactta  | ttgtagttgc  |
| 53521 | ggtaaatctt  | aattthcaaaa | ccaatagggt  | aaacaaatga  | taaaaatgct  | ataggggtga  |
| 53581 | gcaaatccaa  | atgagthtaa  | atthttgatta | aagggthttg  | tgaataataa  | tgaagaaggg  |
| 53641 | cattatthcgt | ctaataaaaag | caattcaata  | ctcttgthgaa | ggaataaaaat | cagctthttat |
| 53701 | atcagaaatt  | gcgttcagac  | aggagthtact | gctthtttata | gtatgtgtct  | caattthgtt  |
| 53761 | tgtthttggat | gtaagtaatc  | tagaacgtgc  | agtaatgata  | agcagcctat  | tcctggtgtt  |
| 53821 | aattgtggaa  | attgttaaca  | ctgctthttga | aacgacaatt  | gagcgtatth  | ccagtgaaca  |
| 53881 | acacatactt  | tcaaaaaag   | tgaagatct   | aggtagtgca  | gcagthtttc  | tttcattaat  |
| 53941 | taactthcctg | ataacatgga  | tgataatatt  | gataggttaa  | tacgaatgtt  | attaagatat  |
| 54001 | gttgtcaaac  | tcaccaatta  | aagthttttat | atcttgcggt  | aatcagaga   | caaatthccat |
| 54061 | gtatccctta  | ctthttgggt  | gatataagcc  | cagtgtataa  | gcatgtagt   | cttgtctatt  |
| 54121 | gaaattacga  | ataaaactag  | agthttttagc | atattthtg   | ctthttactac | tattthttcc  |
| 54181 | ataaacttga  | tcaccaacta  | tggaaatgtcc | tatgtggctc  | atgtggactc  | gaattthggtg |
| 54241 | tgttctgcct  | gtctctaaag  | tgcattthaac | gaggttact   | tgtctataaa  | ctthttgac   |
| 54301 | taaatagtga  | gtgattgcta  | atthgcctgt  | gattthttgtt | acacacatca  | tttctthatt  |
| 54361 | accgcgttht  | ggagcaatgt  | tagthttttat | cgtgccttgc  | tgagaagata  | atgtthccca  |
| 54421 | aactactgct  | aagtattccc  | gctthttttt  | gcgattcgat  | aacaattcag  | acaaaaaact  |
| 54481 | atgggctgct  | tcattthtttg | caattaccat  | tagccacta   | gtatctthtt  | cgagtctatg  |

|       |             |             |             |             |             |             |
|-------|-------------|-------------|-------------|-------------|-------------|-------------|
| 54541 | aacaattcct  | ggtctttacat | taagggtgagc | gataactgcg  | ttcaaaagcg  | tatcattggt  |
| 54601 | tgtcccagca  | cctgggtgca  | ctgttaatcc  | actttgttta  | ctcagaacta  | taatatcctc  |
| 54661 | atcttcatag  | acgatatcaa  | gttttatgtc  | ataattaggc  | tcaattgatg  | tggatatgtc  |
| 54721 | aggttgaacg  | agatgtacta  | tatactcttc  | acctggtttt  | actatgtgat  | cattattaat  |
| 54781 | tatcggtatg  | ccaagtaatt  | tcacctgctc  | attttgtatc  | aatctttgag  | ctttactgcg  |
| 54841 | tgatatgttg  | catttttcag  | ctatataggt  | gtctaacctt  | aatttctctt  | tatcattatt  |
| 54901 | aacacttaag  | gttattattg  | agtgatctat  | agtgatttac  | cccgcgccat  | ttcccattgct |
| 54961 | gcttgaacat  | ttgggtctgt  | aaacattggt  | gcactagact  | caatttgcag  | atcaccttgt  |
| 55021 | tttttaatat  | ggcaaattgt  | ttgagagcca  | tctttccagt  | agattgtaac  | tttattatca  |
| 55081 | aaatctcgta  | atggtgcctc  | aacctttttt  | tctttattat  | ctttttcttc  | cagcttaata  |
| 55141 | gattctaata  | aataatatag  | aaagtcactt  | ggtttgccgt  | tgattttttc  | tttccattca  |
| 55201 | tctgtttttt  | cttgttcaga  | ttttttttgc  | tctaactttt  | ccttcttttg  | ctgcagctta  |
| 55261 | ttttgttctg  | cttcagctc   | taactttcta  | actgtgtcac  | gtagtctctt  | gactttattt  |
| 55321 | tctaatacta  | ataatttatt  | agtattattt  | ccattgttag  | cttctaaatc  | aggcgtactt  |
| 55381 | ggttgagctt  | gcttcttttt  | tatttcttct  | aattcattcc  | ttactacgtt  | taattgcttc  |
| 55441 | ttcaattccg  | ttttttcctt  | ttctgtatcc  | tcttttaact  | tttttagcat  | gctaaggaac  |
| 55501 | tcgttattat  | tagactgctg  | agttgattga  | agccagccta  | caaagcgggt  | tggttcaaata |
| 55561 | cgttcaattt  | tatcttcagc  | aattttaata  | gcattctcta  | acctagaaaa  | agtaccttca  |
| 55621 | atatctagt   | aatgtgcttt  | ttttgtcaat  | tcttttagtgt | tatttaaaac  | ttctgaaatt  |
| 55681 | tctgcatgta  | gccaatctaa  | atcttttttg  | atgtcttctc  | tgattttttt  | taggtgatca  |
| 55741 | agcgtttctt  | taatgttaat  | atttgcaggc  | tttaaaagac  | tattatcaag  | taaatcgcaa  |
| 55801 | gcttttttaa  | ggttactgtc  | aaatgagttg  | caaagcggac  | taagtagttt  | tttcattaga  |
| 55861 | gatattagtt  | cattttccct  | tttaccagc   | ttattttcta  | ctactgatac  | aatcataccc  |
| 55921 | tttccagacc  | agtatggaaa  | tagaagacct  | aaagaactgt  | gttttctaata | agtatgattt  |
| 55981 | tcgatgacca  | cgctattact  | tattagattg  | ctaagtgttg  | atatgatgca  | taaaagaata  |
| 56041 | gcgactaata  | aagctattaa  | tattattgga  | gcattaatgg  | attgtgatat  | tgctgaaact  |
| 56101 | actataatag  | taccaaatac  | atatgatcca  | gtaacaaga   | gaatcctatt  | tctattttct  |
| 56161 | gcttctatat  | cttctagtat  | ttctctctgc  | gtcttagaaa  | ttggtaaaac  | tattgaaagc  |
| 56221 | ttttccccct  | ttttatctaa  | atttgttaca  | atttcaattt  | tttcggcttc  | ttgaacaatc  |
| 56281 | tggctgtact  | gttcatcaac  | ttgatagttt  | cctacttttt  | tatctatctc  | attctctttt  |
| 56341 | attttttgtg  | tatttataaa  | gtttataaca  | gcagtaaata  | agagaactat  | aagagggaata |
| 56401 | aaggcaagag  | gtgctggcgt  | gaacgcaaac  | ccagcaatac  | ttactgtaac  | aggctgaata  |
| 56461 | gaaaaggcag  | taaatgctat  | aagagtagca  | atgggtacttg | ctatcgatat  | agtaccagaa  |
| 56521 | tactttctta  | tagagctcaa  | aattctactg  | ggctgggtcag | aaagttttct  | aaatcctaaa  |
| 56581 | aaatcaaaat  | agtctttgaa  | aggatctttg  | agtgtctgta  | accataacat  | ttttctagtt  |
| 56641 | taaacttatt  | taggtatata  | ttaaccaaac  | cttaaaatca  | agtttcttaa  | tttttcaaca  |
| 56701 | tgtgccaagg  | cctattggag  | cgcactgtat  | taatctttac  | gtaacgattt  | gttaaccaaa  |
| 56761 | cagaatgtgt  | gccatacggt  | tctagatcag  | catgtttaat  | aatttttagcg | ttgcaagctg  |
| 56821 | aatagtcgaa  | actcacttaa  | ttgaattggt  | aaatcaactt  | tatcacaatt  | ttctgaaata  |
| 56881 | tcttcttttt  | tataagcaag  | tagcactgat  | ttattatttc  | ctttattata  | tatacaatca  |
| 56941 | taatcttcac  | actgtagcct  | tttatttgaa  | ttgttatatt  | ttgtatgatt  | caaaatttgg  |
| 57001 | ttctgtccgt  | tttgctttgc  | ccacgttttg  | ataacaaaat  | ttctgctttt  | tctagtgaga  |
| 57061 | gaatatagta  | agttatcact  | ctcctttgca  | gcaacattat  | cagcatttat  | taggatgtcg  |
| 57121 | gggtttttat  | atgcagcgct  | aaagcaaata  | cctagtacaa  | taaaaaaaaa  | tcccaaaaaa  |
| 57181 | cgccaatttc  | tttcccacaa  | gcacagccac  | aataacccaa  | atgttattat  | aataattgat  |
| 57241 | gaggcaggaa  | aagtacgaat  | gggaataacc  | aaatactgaa  | gactagegat  | agcgtttggt  |
| 57301 | atatacaaaa  | tgctgtcaat  | tgggcgctct  | acaagtggcg  | ctataatcca  | ttcaataccg  |
| 57361 | aaaggaatca  | acaaaacata  | gattattcca  | agtggaataa  | taattaatgt  | aactatcggt  |
| 57421 | atagcaacta  | aatttgtgat  | aatgccacta  | attgaaaaat  | aattaaaaat  | atatatcgta  |
| 57481 | tacggaacag  | ttgctaaaact | tgctattact  | gagctgatca  | ttatcgacac  | aaaaatatttc |
| 57541 | attattttta  | ttttgaataa  | tttgttggca  | ttgatttgat  | aactggcaac  | cagtgccaaa  |
| 57601 | acagcagaaa  | atgacatctg  | aaagccaggc  | tttaaaaattg | cttctgggtc  | tactgagagt  |
| 57661 | atcactgaag  | cagcaaacgc  | aattgctatt  | aaccctcgat  | attttctctc  | tatcattatt  |
| 57721 | gcaacgagta  | ctaaaatcac  | catgatgtag  | gcacgctgag  | cagaaatttg  | cataccggta  |
| 57781 | atcaacaaat  | aaaacgtggg  | tggcaagata  | gtaaggaatg  | cagatatattt | cttggtgtta  |
| 57841 | tacttaagag  | tcaaagtttc  | agatattgcg  | aataaaattac | gaaacactac  | aaaaaacaga  |
| 57901 | ccagcaacga  | atgataaatg  | caaaccagat  | atggcaaaca  | aatgtgctat  | acctgaatct  |
| 57961 | cgtatcgcg   | ccatagtttt  | ttgatctatg  | ccatcttttt  | taccgatcag  | taatgcagag  |
| 58021 | attatatccg  | catgtgggtt  | cttgatattt  | tgctgcagggt | tttcataaat  | gtattgacgg  |
| 58081 | aaagatttcta | tatattcttg  | aaatttcctt  | gcttcagcct  | ttttgtgcag  | ggctattttg  |

```

58141 cttgttgcaa agcctgttgc acttattttc tggtaatatg ctattcttgc aaaatcgtat
58201 gcatactccg agggcgcaat ctttagaggg aagagttttg ctgataattt tacttgatcg
58261 cctattttta tgcctttttc cactttgggt ctaactgata ttctgatgtt atctagagct
58321 ctatccggtg tcattccagc gcgtgacgct ggaatccata tctttttttt ctggatccca
58381 gtatcaagta ctgggatgac aaaagggggc gctgggatga caggagagga ttttgagata
58441 gtaggggatt tttcaacaga aagcagaaat tgtttatatg agcccctgtc gttaatatcc
58501 ttcactgtgg caacgatatc ttttacatat ctctctttat caagaatttg agtatcaact
58561 aaagctgttc ttaatttact agctgtaaat cctatgagca ctgcaattaa agcgatacac
58621 aatatcgcg accttttata caatattgca atcaaaaatta gtgtgggtaa aagcaaaaga
58681 aaaatagata tgcagcttgg ttcaaaactt agggaaaaat aggttagaat tcctacacac
58741 tgaaaaacag gaaaccacag tatcaagtta tattgttcat tgcgcagatt gttacgtata
58801 taactaacta ttatgtcaag aaaagttaat aagtgtgtcg atatttgcac gtggtgaaat
58861 tttattttta ttttttcatt atttgtatat ataataacta aataagcaac gacgcgggat
58921 ggagcagctc ggtagctcgt caggctcata acctgaaggt cgtaggttca aatcctactc
58981 ccgcaaccat ttttaaggat atagtgtgtc cactttccaa tcgcttccct caacaagagt
59041 gtatctaaat ctaatatgct tcctatattc accttcttgc caaaattcaa ttacttttgg
59101 gattacgcaa aatcccaccc aaaaatcagg acgagggacc ttttgatcat aaaattcttt
59161 attcttcaat tcaatagctt gctcaaaatc ttgccaatct ttcagaatgc tcgattgttt
59221 tgagcaccat gcgctaattt gactatcacg tgctcgagaa gagaagtatt tgtcagttct
59281 ttcacgtttt agaagttaa cctctccttc aattcttacc tgcctagaaa attctatcca
59341 gtgaaacact aacgcagctt tggggttctc agtcaattct ttcccttttt tactgtttac
59401 gttagtgaat aacacaaaac cttcttttgc atattccttt agtaatacca ctcttgcaga
59461 tggaatacac tctttgtctac aagttgctag cgtcattgca gttgggtgtt cacacggaga
59521 attaatgact gctttgtacc actttgaaaa caaatcaaat ggatcttttt caagtgaaaa
59581 tatcatatca aaaaataaaa tcttaattct ggcacgcgtt gcaaaaataa gtgctacggc
59641 cattttgtcg tataagtgtt atgatattat tgcaaatctt gcaaggtttt tgaactttac
59701 catatacgta aaagtatttt tgaaagtatc cagcagatcc agatggctgt gcataatctt
59761 tcagtgttga accgcctgca gcaattgcat cactcagagt attttttatt tcagcagcaa
59821 gtttttcgca ctctctatag gtcaagtttt ttgctgacct gagtggtgat atacaggctc
59881 taaacaagct ctcagaagca tatatgttgc ctacgccaac tattgattta ttgtccatta
59941 acgctgattt gatattcact tttttgtttt tcagcaactc ctgtaaatag tctccactga
60001 attcatccgt gaggggctct attccaaaat cgctaaaaaa atccgtttct tgttctttat
60061 ttaaaacgat aactaatcca aatcttcttg ggtcattaaa aattattgaa gtattgtcag
60121 aaaataaaaa taccacgtga tcatgcttat tccgcatttg atcgtggtca gcataataa
60181 gctttccgct catgccaaaga tgtatgatta cagccacact accatctgta ttccagatgg
60241 tatacttacc tctacgcttg atgttgcgta tgactttgcc ctttagcata tcatcaatat
60301 tttttgttat tggggcacgt aaattccaat tattcactat aacattactg atttgcttgt
60361 ttttaatttt atcaagcaaa aaattagaga ttacttccac ttccggtagt tctggcatga
60421 tacctccttc aaaacttaag tttctgatgg taattttgtc gttctcaaat acattcgagt
60481 attctgcggt gctttctcct aaaaattcct caccacaaac gagttttgaa agggttctct
60541 gtctactctg ttgctgcttt tttcttttca aaatattttg ctttaaagct ttcgctaata
60601 tttttttctc ctcttctttt tccttattct tttttgtgtt attcattatc ataatatata
60661 aacttgccgt tgtagctcag gtggtagagt acgtcatttg taatgacgag gtcccaagtt
60721 cgagtcttgg taacggcaca ctgattatac ttataatatt gcataacttg taagcaaggc
60781 ttagaagaaa gttacagagg taagttgtca tgctttttcc atatcctttc taccttcttg
60841 tttttgagta gctctaagtc tttaaaaaag tgataccttg ttttacttgg cactataatg
60901 tcatcaatgt atccatatga tgcagcaaaa aatgggttag caaatttttc tttatattct
60961 ttaattaacg tttgctgata tttttcgtgt cgaaatataa tctcaactgc actttcaggg
61021 cccatcacag ctatttcagc agttggccag gcataattta tatcaccttt tagatgtttc
61081 gaattcataa caatgtatgc accaccatac gcttttctag tgataaggct aattttcggc
61141 acggtcgctt cagcgtaa

```

//

```

LOCUS      JAQZAU010000055      6859 bp      dna      linear      ENV 17-MAR-2023
DEFINITION MAG: Wolbachia pipientis isolate wEsol contig_34592, whole genome
            shotgun sequence.
ACCESSION  JAQZAU010000055  JAQZAU010000000
VERSION    JAQZAU010000055.1
DBLINK     BioProject: PRJNA929258
            BioSample: SAMN33142973
KEYWORDS   WGS; ENV; Metagenome Assembled Genome; MAG.

```

SOURCE Wolbachia pipientis (insect metagenome)

ORGANISM Wolbachia pipientis  
Bacteria; Pseudomonadota; Alphaproteobacteria; Rickettsiales;  
Anaplasmataceae; Wolbachieae; Wolbachia.

REFERENCE 1 (bases 1 to 6859)

AUTHORS Fiutek,N., Couger,B.M., Roy,S., de la Torre,J.R. and Connor,E.F.

TITLE Genomic assessment of the contribution of the Wolbachia  
endosymbiont of Eurosta solidaginis to gall-induction

JOURNAL International Journal Molecular Sciences

REFERENCE 2 (bases 1 to 6859)

AUTHORS Fiutek,N., Couger,B.M., Roy,S., de la Torre,J.R. and Connor,E.F.

TITLE Direct Submission

JOURNAL Submitted (10-FEB-2023) Biology, San Francisco State University,  
1600 Holloway Ave, San Francisco, CA 94132, USA

COMMENT ##Genome-Assembly-Data-START##  
Assembly Date :: JUN-2019  
Assembly Method :: FLYE v. 06-2019  
Genome Representation :: Full  
Expected Final Version :: Yes  
Genome Coverage :: 100.0x  
Sequencing Technology :: Illumina HiSeq; PacBio Sequel  
##Genome-Assembly-Data-END##

FEATURES Location/Qualifiers

source 1..6859  
/organism="Wolbachia pipientis"  
/mol\_type="genomic DNA"  
/submitter\_seqid="contig\_34592"  
/isolate="wEsol"  
/isolation\_source="galls on Solidago altissima"  
/host="Eurosta solidaginis MN-2018-EFC"  
/db\_xref="taxon:955"  
/environmental\_sample  
/country="USA: Cowling Arboretum, Carleton College,  
Northfield, MN"  
/lat\_lon="44.48 N 93.13 W"  
/altitude="280 m"  
/collection\_date="2018-11"  
/metagenome\_source="insect metagenome"  
/note="metagenomic"

gene complement(5..1375)  
/locus\_tag="wEsol\_00582"

CDS complement(5..1375)  
/locus\_tag="wEsol\_00582"  
/codon\_start=1  
/transl\_table=11  
/fullproduct="qcoverage 100 , hcoverage 100 , similarity  
99.8 , identity 99.6 , eval 3.37e-290 , alnlength 456 ,  
Bacteria , Proteobacteria , WP\_015589086.1 MULTISPECIES:  
magnesium transporter [unclassified Wolbachia]"  
/cog="MgtE COG2239 451 Mg/Co/Ni transporter MgtE  
(contains CBS domain)"  
/pfam="MgtE\_N CBS MgtE"  
/tigr="TIGR00400 mgtE 450 magnesium transporter"  
/product="magnesium  
transporter"  
/translation="MNIKISSHYGLDKKAIDDLIESLDNEELENVCSIVKTIDSVQLA  
YFLSTSISDHREKLVNILDQHLSDALVHVVPDLQIEIIETLGIENTAKLLMLLDVED  
IVTIVKDLDRKSVENILYYLPSTQKSVEELLSYPEESAGRLIHKDMVIAPYYWTINQ  
LTFVCNYKKIPEKFHQIFIINSKLEPIGVSNNLRVISHSGDTIIKEIMDHDIIKIKT  
GVDQEEVARIFKDYSLLSAPVVNKNKGKIIGVILIEDVIKVVQQETEDVLKISGVSSK

```

ADINAPIHKTIKRLPWLLFNLLAAAMCSIVVGFFDDVIKSFIVLPIIMPIIASMSGN
AGSQTVTLTIRAIATKYLTEQNAKRILMKEFLIGLINGVILSTISLVVLAIRFHNFKV
EMIFVVSIMIMSIIATFIGTFIPIMLHRLKSDPAVSSSILTSATTDILSAFIFLGLAT
IFLLNS"
/besthit="qcoverage 100 , hcoverage 100 , similarity 99.8
, identity 99.6 , evalue 3.37e-290 , alnlength 456 ,
Bacteria , Proteobacteria , WP_015589086.1 MULTISPECIES:
magnesium transporter [unclassified Wolbachia]"
gene 1623..2633
/locus_tag="wEsol_00583"
CDS 1623..2633
/locus_tag="wEsol_00583"
/codon_start=1
/transl_table=11
/fullproduct="qcoverage 100 , hcoverage 100 , similarity
100 , identity 100 , evalue 3.09e-239 , alnlength 336 ,
Bacteria , Proteobacteria , AGJ99932.1 Peptide chain
release factor 2 [Wolbachia endosymbiont of Drosophila
simulans wHa]"
/cog="PrfB COG1186 239 Protein chain release factor B"
/pfam="Pfam-B_1081 PCRF RF-1"
/tigr="TIGR00020 prfB 365 peptide chain release factor 2"
/product="Peptide chain release factor 2"
/translation="MRLEELDSQASNDDLWQDNQKAQEVVKERSKIKNDVESFLKLES
DYNDALSLMKSAIDENDEEFFSEVENELAKLEKLIKYKETESLFTGEADNNCFLEIH
SGAGGTESNDWAEMLMRMYIRWAEIYHNPFKVEVVEKLEGESVGIKSAMIKIVGEKAYG
WAKSESGIHRLVRISPFDANGKRHTSFASVGVTPVIEDSIDIAVDEKDLKIDTYRASG
AGGQHVNKTESAVRITHIPTGVVVQCQNGRSQHRNKDEALKLLKGRLYQIELEKKEQK
MAEEYGKKCDIGWGNQIRSYVMHPYQMVKDLRTGHEVGNINSVFDGNIDCFIVSVLTK
QN"
/besthit="qcoverage 100 , hcoverage 100 , similarity 100
, identity 100 , evalue 3.09e-239 , alnlength 336 ,
Bacteria , Proteobacteria , AGJ99932.1 Peptide chain
release factor 2 [Wolbachia endosymbiont of Drosophila
simulans wHa]"
gene complement(2813..2977)
/locus_tag="wEsol_00584"
CDS complement(2813..2977)
/locus_tag="wEsol_00584"
/codon_start=1
/transl_table=11
/fullproduct="qcoverage 100 , hcoverage 100 , similarity
100 , identity 100 , evalue 2.14e-30 , alnlength 54 ,
Bacteria , Proteobacteria , WP_010082072.1 MULTISPECIES:
IS3 family transposase [Wolbachia]"
/cog="Tra5 COG2801 232 Transposase and inactivated
derivatives"
/pfam="rve_3 rve_2"
/product="IS3 family
transposase"
/translation="MSNKGCCYDNSVAESFFSSLKREILIDTSQHSAQQTRTAIFEYI
EIFYNKQRHY"
/besthit="qcoverage 100 , hcoverage 100 , similarity 100
, identity 100 , evalue 2.14e-30 , alnlength 54 ,
Bacteria , Proteobacteria , WP_010082072.1 MULTISPECIES:
IS3 family transposase [Wolbachia]"
gene complement(2970..3131)
/locus_tag="wEsol_00585"
CDS complement(2970..3131)
/locus_tag="wEsol_00585"

```

```

/codon_start=1
/transl_table=11
/fullproduct="qcoverage 100 , hcoverage 100 , similarity
100 , identity 100 , evalue 5.54e-28 , alnlength 53 ,
Bacteria , Proteobacteria , WP_010082071.1 MULTISPECIES:
hypothetical protein [Wolbachia]"
/cog="Tra5 COG2801 232 Transposase and inactivated
derivatives"
/pfam="rve"
/product="hypothetical protein"
/translation="MSSAINKQLVMNSLLMAINRRKPVKNLLHSDQGSQYTAQGYQY
LLAVKNIDE"
/besthit="qcoverage 100 , hcoverage 100 , similarity 100
, identity 100 , evalue 5.54e-28 , alnlength 53 ,
Bacteria , Proteobacteria , WP_010082071.1 MULTISPECIES:
hypothetical protein [Wolbachia]"
gene complement(3135..3332)
/locus_tag="wEsol_00586"
CDS complement(3135..3332)
/locus_tag="wEsol_00586"
/codon_start=1
/transl_table=11
/fullproduct="qcoverage 100 , hcoverage 100 , similarity
100 , identity 100 , evalue 1.88e-40 , alnlength 65 ,
Bacteria , Proteobacteria , WP_010082070.1 hypothetical
protein [Wolbachia endosymbiont of Drosophila incompta]"
/translation="MQKNDIRAILRRKFKIKKQQTDNRAVAPNILDQNFIVDQPNKVW
DYLHQNQGGMAIFGSNNSHVW"
/product="hypothetical protein"
/besthit="qcoverage 100 , hcoverage 100 , similarity 100
, identity 100 , evalue 1.88e-40 , alnlength 65 ,
Bacteria , Proteobacteria , WP_010082070.1 hypothetical
protein [Wolbachia endosymbiont of Drosophila incompta]"
gene complement(3554..3847)
/locus_tag="wEsol_00587"
CDS complement(3554..3847)
/locus_tag="wEsol_00587"
/codon_start=1
/transl_table=11
/fullproduct="qcoverage 100 , hcoverage 100 , similarity
99.0 , identity 99.0 , evalue 6.55e-60 , alnlength 97 ,
Bacteria , Proteobacteria , WP_155968835.1 transposase
[Wolbachia pipientis]"
/cog="COG2963 COG2963 116 Transposase and inactivated
derivatives"
/pfam="HTH_Tnp_1 HTH_23 HTH_28"
/product="transposase"
/translation="MVREYTAEFKLEAVKLTNEQRKVGQPVAKVARDLGIRDSVLGKW
MKKYNEKKSAANAFPDVAPYDKERFDLQSKSNKGKRHLKKSPGQSKRVKYFFI"
/besthit="qcoverage 100 , hcoverage 100 , similarity 99.0
, identity 99.0 , evalue 6.55e-60 , alnlength 97 ,
Bacteria , Proteobacteria , WP_155968835.1 transposase
[Wolbachia pipientis]"
gene complement(3926..4684)
/locus_tag="wEsol_00588"
CDS complement(3926..4684)
/locus_tag="wEsol_00588"
/codon_start=1
/transl_table=11
/fullproduct="qcoverage 100 , hcoverage 100 , similarity

```

```

100 , identity 100 , evalue 7.50e-182 , alnlength 252 ,
Bacteria , Proteobacteria , WP_006280935.1 MULTISPECIES:
phosphate ABC transporter ATP-binding protein PstB
[Wolbachia]"
/cog="PstB COG1117 253 ABC-type phosphate transport
system, ATPase component"
/pfam="AAA_23 DUF258 SMC_N AAA_29 AAA_22 AAA_21 ABC_tran
AAA_21 Pfam-B_16450 Pfam-B_15070"
/tigr="TIGR00972 3a0107s01c2 248 phosphate ABC
transporter, ATP-binding protein"
/product="phosphate ABC
transporter ATP-binding protein PstB"
/translation="MSNTRASVKDLNLWYGSKQVLF DINLN IYKRKVTTFIGPSGCGK
STFLRCFNRMNDYVPGCKTVGELDIDGLGDIYSRMDVLLRAKVGMMVFQKPNPFPS
IYDNVACGPKLHGMAKDKQKLNEMVENSLTKVGLWEELKDRLQDSALNLSGGQQQRLC
IARAIKPTILLMDEPCSA LDPMATNAIENLIQELKLRFTIIMVTHSMKQAKKLSDS
VIFFFHNGRIVESGSTQEIFENASPLTKEYILDH"
/besthit="qcoverage 100 , hcoverage 100 , similarity 100
, identity 100 , evalue 7.50e-182 , alnlength 252 ,
Bacteria , Proteobacteria , WP_006280935.1 MULTISPECIES:
phosphate ABC transporter ATP-binding protein PstB
[Wolbachia]"
gene complement(4681..5466)
/locus_tag="wEsol_00589"
CDS complement(4681..5466)
/locus_tag="wEsol_00589"
/codon_start=1
/transl_table=11
/fullproduct="qcoverage 100 , hcoverage 100 , similarity
99.6 , identity 99.6 , evalue 4.31e-181 , alnlength 261 ,
Bacteria , Proteobacteria , WP_010962542.1 MULTISPECIES:
4-hydroxy-tetrahydrodipicolinate reductase [Wolbachia]"
/cog="DapB COG0289 266 Dihydrodipicolinate reductase"
/pfam="DapB_N DapB_C"
/tigr="TIGR00036 dapB 270 dihydrodipicolinate reductase"
/product="
4-hydroxy-tetrahydrodipicolinate reductase"
/translation="MKIRVGVIGCLGRMGKKILNELITNTKVEIAGAVARSGSKYIDS
DIGPIIANLGIKVTSSISGIFESSDVVIDFTTKECMLDCLKAAVKFKTPLVSGTTGIE
GVDLKEYAAEVPILWSANMSVGVNVLLKLVKKAAELLGNEYDVEIWEMHHNLKKDSPS
GTAIELGKTIANASKVDFQSNQCLHSGSNIRKKGGIGFAVSRGGGVIGDHSVFMVNSD
ERIELNHKAIDRTTFARGAVQAAVWLYENKREIPGLYSMQDVI"
/besthit="qcoverage 100 , hcoverage 100 , similarity 99.6
, identity 99.6 , evalue 4.31e-181 , alnlength 261 ,
Bacteria , Proteobacteria , WP_010962542.1 MULTISPECIES:
4-hydroxy-tetrahydrodipicolinate reductase [Wolbachia]"
gene complement(5873..>6859)
/locus_tag="wEsol_00590"
CDS complement(5873..>6859)
/locus_tag="wEsol_00590"
/codon_start=1
/transl_table=11
/fullproduct="qcoverage 100 , hcoverage 95.3488372093023
, similarity 100 , identity 100 , evalue 5.59e-235 ,
alnlength 328 , Bacteria , Proteobacteria ,
WP_174516781.1 Fic family protein [Wolbachia endosymbiont
of Cardiocondyla obscurior]"
/cog="COG3177 COG3177 348 Fic family protein"
/pfam="Fic DUF977"
/product="Fic family protein"

```

/translation="VAEIDEFKGAWQLFGNLAPERLQMLKKIATIESIGSSTRIEGAR  
 LSDREVEQLLSKLDTRSFRSLDEREIAGYAYVCEEVFQNFNKMFPFTENTIKQFHIWLL  
 QFSYKDQRHMGEEKFPNHVEAFDESGKSLGIVFETASPFETATQMQLIYWTSQQLE  
 VKSLHPLLIIGIFIVTFLAIHPFQDGNRLSRILTTFLLLKLGYIYVPYSSLESNKES  
 YYLALRRTQQSLKTSSNDFNPWLIFFLRSIQKQKQFYLEQKVSHEKVLNLYLPPLSAEI  
 LALLSKHGRLTIKDLENITKANCNTLKKHVSNLVKS NHITQHKGGRATWYVI"  
 /besthit="qcoverage 100 , hcoverage 95.3488372093023 ,  
 similarity 100 , identity 100 , evaluate 5.59e-235 ,  
 alnlength 328 , Bacteria , Proteobacteria ,  
 WP\_174516781.1 Fic family protein [Wolbachia endosymbiont  
 of Cardiocondyla obscurior]"

# ORIGIN

|      |            |             |             |             |             |             |
|------|------------|-------------|-------------|-------------|-------------|-------------|
| 1    | agtattagct | atttaataaaa | aagatcgtag  | ctaaaccaag  | aaatataaaa  | gctgagagaa  |
| 61   | tatcagttgt | tgccgatgtt  | aggattgaag  | aagaaacggc  | agggtcagac  | tttaagcgat  |
| 121  | gaagcattat | aggaatgaaa  | gttccgatga  | acgttgcaat  | aattgacatc  | ataatcatgg  |
| 181  | agaccacaaa | aatcatctcc  | actttgaagt  | tgtgaaacct  | tattgctaac  | actactaatg  |
| 241  | aaatagtaga | taagatcacc  | ccgtttataa  | gacctattaa  | aaattccttc  | atcagtattc  |
| 301  | tttttgcatt | ttgctcagtt  | agatattttg  | ttgcgattgc  | ccggatgggt  | agcgttactg  |
| 361  | tttgggatcc | tgcatttccg  | ctcattgatg  | caattatcgg  | catgattatt  | ggcagcacta  |
| 421  | taaaactttt | tattacatca  | tcgaaaaagc  | caactactat  | ggaacacatt  | gctgcagcta  |
| 481  | agagggtaaa | cagtaaccaa  | ggtagccttt  | taattatagt  | tttatgtata  | ggggcattta  |
| 541  | tatcggcttt | agaagataca  | ccgcttattt  | tgagtacatc  | ctcttctggt  | tcttgttgaa  |
| 601  | caacttttat | cacatcttca  | attaagatca  | caccaataat  | tttaccattc  | ttatttacta  |
| 661  | ccggagccga | taatagagag  | taatctttta  | atattccttg  | tacttcctct  | tgggtctactc |
| 721  | cagttttaat | gatttttatg  | tcatgatcca  | ttatctcttt  | tattattgtg  | tctcctgagt  |
| 781  | gagatattac | cctattttaa  | ttaacactgc  | ctataggctc  | taattttgag  | ttgataatga  |
| 841  | atatctgggt | aaatttttct  | ggtatttttt  | tatagttgca  | cacaaattct  | gtcagttgat  |
| 901  | ttattgtcca | ataatatgga  | gctataacca  | tatctttatg  | tattaacctt  | cctgcacttt  |
| 961  | cttctggata | tgatagcaac  | tcctctaccg  | atttctgagt  | tttgctgggc  | aaatagtaaa  |
| 1021 | gtatattttt | tacagacttt  | ctatctaaat  | ctttcactat  | ggttactata  | tcttctacat  |
| 1081 | caaggagcat | tagtaacttt  | gctgtatttt  | ctattcccaa  | tgtttctatg  | atctctattt  |
| 1141 | gtaaactctg | cactacatgc  | actagggcat  | cacttaacaa  | atgttgatcg  | aggatattaa  |
| 1201 | ctaattttct | cctgtgatca  | ctgattgaag  | tagataaaaa  | ataagctaac  | tgaacgctat  |
| 1261 | ctatcgtttt | tacaatacta  | caaacattct  | ctagctcctc  | gttatcaagt  | gactctatta  |
| 1321 | agtcatcaat | agcctttttg  | tctaaaccat  | aatgagaact  | tatttttaata | ttcattactt  |
| 1381 | taccttattt | tttaataaat  | atacgcgctt  | gatttcctta  | aacattaaag  | tataatgaaa  |
| 1441 | ttattttaat | taactatcat  | atgggttaaat | ttctattttg  | tttactgtta  | ttgttattga  |
| 1501 | tagtaaatat | attaaaaatct | aaagtataat  | gaaaacttat  | ccagaaattc  | ttgaacactt  |
| 1561 | tcaaagctta | aataaaaagta | tttctcttat  | caggaggtgt  | ctttgacata  | gaaaaattaa  |
| 1621 | agttgcgcct | tgaagagctt  | gactcccaag  | cgtcgaatga  | tgacctatgg  | caagataacc  |
| 1681 | aaaaagcaca | agaagtttta  | aaagaacggt  | ctaaaattaa  | gaatgacgta  | gagtcgtttt  |
| 1741 | taaagctgga | aagcgattac  | aacgatgcca  | tcagcttaat  | gaagtctgct  | attgatgaaa  |
| 1801 | atgatgaaga | atttttctct  | gaagttgaaa  | atgaattagc  | taagctagag  | aaattaatca  |
| 1861 | agtataaaga | aacagagtcc  | ttattttactg | gtgaagcaga  | taataataac  | tgcttttttag |
| 1921 | aatccactc  | aggagctggc  | ggaaccgaga  | gcaatgattg  | ggctgaaatg  | ctgatgcgca  |
| 1981 | tgtatataag | gtgggcagaa  | atttatcaca  | actttaaagt  | tgaagttgta  | gaaaaattag  |
| 2041 | aaggagagtc | agtttggtata | aagtctgcaa  | tgataaaaaat | cgttggagaa  | aaagcttatg  |
| 2101 | ggtgggcaaa | aagtgaaaagt | ggaattcaca  | ggctgggttag | aatatcgccg  | tttgatgcaa  |
| 2161 | atggtaaacg | tcataccagt  | tttgcaagtg  | taggagtaac  | tccagtgata  | gaagattcaa  |
| 2221 | ttgatattgc | tgtggatgaa  | aaggatctaa  | agatcgacac  | ctaccgagct  | tctggagcag  |
| 2281 | gcggtcagca | tgtgaacaaa  | actgaaagtg  | cggtacgcat  | tacgcatatt  | ccaactgggtg |
| 2341 | ttgtagttca | atgccaaaaat | ggtcgttctc  | aacacagaaa  | taaagatgag  | gcattgaaat  |
| 2401 | tacttaaaag | acgttttatac | caaattgaac  | tggaaaaaaa  | agaacagaaa  | atggctgaag  |
| 2461 | aatatggtaa | aaaatgcgat  | ataggctggg  | gtaatcagat  | cagatcgta   | gttatgcac   |
| 2521 | catatcaaat | ggtgaaggat  | ttaagaaccg  | gacatgaagt  | gggcaatata  | aattctgttt  |
| 2581 | ttgatggtaa | tatagattgt  | ttcatagtta  | gtgtgcttac  | taagcaaaaat | taggtagggt  |
| 2641 | tgacttttct | gccataatat  | atgataatta  | aaatatgtt   | aaagtaggag  | taaagttagt  |
| 2701 | gcgattaaat | atgatcagtg  | gaaaagtgc   | cttaccacaga | aaaagtggag  | agaaagtgtg  |
| 2761 | gaatgttttt | tacaaaaaga  | atgatgcac   | aaattgttct  | ggaatgcaat  | agttaatagt  |
| 2821 | gacgtttgtt | gttataaaaa  | atttctatgt  | attcaaatat  | tgacgttcta  | gtttgttgag  |

|      |             |             |            |             |             |             |
|------|-------------|-------------|------------|-------------|-------------|-------------|
| 2881 | cagagtgttg  | tgaagtatca  | ataagtat   | ctcttttcaa  | tgagctaaag  | aagcttttctg |
| 2941 | caacagaatt  | gtcgtaacaa  | cagcctttat | tactcatcta  | tattcttttac | agctaagaga  |
| 3001 | tattgatacc  | cttgcgagc   | atattgtgaa | ccttggtcac  | tgtgcagcag  | tagattttta  |
| 3061 | acaggtttac  | gcctattaat  | ggccattaat | aaagagttca  | taaccaattg  | tttattttatt |
| 3121 | gcactactca  | ttaactacca  | tacgtgagaa | ttattgctgc  | caaatatagc  | catccctcct  |
| 3181 | tgggttttgat | gtaagtaatc  | ccatacttta | tttggttgat  | caacaataaa  | gttttgatct  |
| 3241 | agtatatagg  | gagctacagc  | tctattatct | gtttgttggt  | ttttaatttt  | aaacttttctt |
| 3301 | ctcagtatag  | ccctgatgtc  | atTTTTctgc | ataatacttt  | gcaccgtttt  | caaattgcaa  |
| 3361 | cttttacc    | aagccttcaa  | ttcagcatga | atTTtaggag  | ctccatatct  | acatttagaa  |
| 3421 | gcttgatata  | ttttttgaat  | atctgcta   | aactctttat  | ttgctgattc  | tctactgctt  |
| 3481 | atTTTTcttg  | tgggtccactt | atagtagcca | ctagcagaaa  | atcctacata  | attcctgtac  |
| 3541 | tttatagcag  | ttactatata  | aaaaaatatt | ttactctttt  | tgactggcca  | gggctttttt  |
| 3601 | ttaaatgtct  | ctttcccttg  | ttactcttgc | tttgtaa     | aaacctctct  | ttgtcataag  |
| 3661 | gtgctacatc  | tggaaatgca  | tttgccgctg | actttttttc  | gttatatttc  | ttcatccatt  |
| 3721 | ttcctaatac  | actatccctt  | attcctagat | ctcttgctac  | ttttgcaact  | ggttgaccta  |
| 3781 | cctttctttg  | ttcatttgtc  | agcttaacag | cttccaattt  | gaattctgcc  | gtatattctc  |
| 3841 | ttaccatttc  | taatcctcca  | aaatTTtatt | ttacccaaaa  | aaactctttt  | ctttctctcc  |
| 3901 | actttttctg  | ggtaagggtca | gaaatTTaat | gatccaggat  | atactccttt  | gttaaggagg  |
| 3961 | attgagcatt  | ttcgaatatt  | tcttgagtgc | ttccagactc  | aacaattctg  | ccattatgaa  |
| 4021 | agaaaattac  | actatcagat  | aactTTttag | cttgcttcat  | tgaatgagtc  | accataatta  |
| 4081 | tagtaa      | taatttcagc  | tcttgata   | gatttttcgat | tgcattgggt  | gccattggat  |
| 4141 | caagagcaga  | gcacgggtca  | tccattaata | aaatagttgg  | cttcaactgca | attgcgcgag  |
| 4201 | cgatgcatag  | cctctgttgt  | tggccaccgg | ataaattgag  | tgcgctatct  | tgcaatctgt  |
| 4261 | ccttcaattc  | ttcccataaa  | ccaaccttgg | ttaaactatt  | ttccaccatc  | tcatttaatt  |
| 4321 | tttgcttatc  | cttcgccata  | ccatgcaatt | ttggcccaca  | agcaacatta  | tcatatattg  |
| 4381 | atTTtgga    | aggatttggc  | ttttgaaata | ccataccaac  | ttttgctcta  | agtagtaaa   |
| 4441 | catccatata  | gcgtgaatat  | atatcaccca | gcccatacgat | atctaattca  | ccaacagttt  |
| 4501 | tgcaacctgg  | tacatagtca  | ttcatacgat | taaaacaacg  | caaaaatggt  | gatttaccgc  |
| 4561 | acccggatgg  | tccgataaaa  | gtagtaactt | ttcttttata  | aatattcaaa  | tttatatcga  |
| 4621 | ataaaacttg  | cttagagccg  | taccagagat | ttaaatcttt  | aacagaggca  | cgtgtattgc  |
| 4681 | tcatatcaca  | tcctgcattg  | aatagagccc | cggaatttct  | cttttatttt  | cgtatagcca  |
| 4741 | tactgctgct  | tgaacagctc  | ctctagcaaa | tgttgtgcga  | tcaattgctt  | tgtggtttag  |
| 4801 | ttctatccgt  | tcatacagaat | taacaaacat | cacgctgtga  | tctcctatta  | ctccacctcc  |
| 4861 | acgagatact  | gcaaaaccta  | ttccccctt  | tttccttatg  | tttgaaccac  | tatgtaaaca  |
| 4921 | ttgattggac  | tgaaaatcca  | cttttgaagc | gttagcaatt  | gttttgccaa  | gttctatagc  |
| 4981 | tgttccagat  | gggtgaatcct | tttttaagtt | atgatgcatt  | tcccaa      | caacgtcata  |
| 5041 | ttcattacct  | aaaagctcag  | cagctTTTTt | taccaatttc  | agcaacacat  | taaccccaac  |
| 5101 | actcatat    | gctgaccata  | atattggaac | ttcagcagca  | tattctttca  | aatcgacacc  |
| 5161 | ttctattcca  | gttgtgccac  | taaccagcgg | tgtttttaa   | tttacagctg  | ctttaaggca  |
| 5221 | gtctaacata  | cattcttttag | ttgtaaaatc | tattacaacg  | tcagatgact  | caaatatgcc  |
| 5281 | actaatagaa  | cttgtaactt  | taattcctag | attggctata  | attgggtccaa | tatctgaatc  |
| 5341 | tatgtactta  | ctacctgaac  | gggcaacagc | acctgctatt  | tccacttttg  | tatttgtaat  |
| 5401 | taattcattg  | agtatttttt  | tgcccattct | gcctaagcag  | cctattactc  | caactctgat  |
| 5461 | tttcataaag  | cttttttacgt | ttattaagaa | tgttaggcct  | ttttttaagc  | tctgtcactt  |
| 5521 | ctgatctata  | ttctatagct  | gtacgaacac | tgcaatttca  | gatcccagtg  | ccttgaccac  |
| 5581 | aactattgca  | atatggtaca  | tagtgaacga | tgctattcca  | gtctggaatc  | tagcctttct  |
| 5641 | gcaatctcat  | cgaaaacggt  | gtaaccactt | tctatgctag  | tttgcttgct  | tacaagcaaa  |
| 5701 | cttttctgga  | tcccagtgct  | tgggcactgg | gatgacagga  | gaaggcactg  | ggatgacaag  |
| 5761 | aatagggcac  | tgggatctag  | tgggctcaaa | ctacaatggt  | tgtacagctg  | tgatctatat  |
| 5821 | tctatagctg  | aataatttaa  | caattcaaaa | tgaatacata  | tcctattgag  | ctctatatta  |
| 5881 | cataccaggt  | tgctctgcct  | tttccatgct | gagtaatgtg  | attactcttt  | acgagattag  |
| 5941 | atacgtgctt  | ctttaaggta  | ttgcagtttg | cttttagtaat | atTTtccaaa  | tccttaattg  |
| 6001 | taagacgtcc  | atgtttgctg  | agtagtgcta | gtatttcagc  | agaaagtggg  | ggtaaataga  |
| 6061 | gatttaacac  | tttttcatgt  | gacacctttt | gttcaagata  | aaatTTttgc  | ttttgtagtg  |
| 6121 | accttaaaaa  | gaatataagc  | catggattaa | aatcattgct  | gctcgtcttc  | aaggattggt  |
| 6181 | gagtacgacg  | caaagctaag  | tagtaactct | ccttattact  | ttcaaggga   | ctgtaaggta  |
| 6241 | catagatata  | ccctaacttt  | agtaacaaga | aagttgtgag  | aatgcgtgat  | aatctgccat  |
| 6301 | ttccatcctg  | gaagggatga  | atagctaaaa | aagtaactat  | aaaaatgcc   | ataattaata  |
| 6361 | gagggtgtaa  | cgatttcacc  | tctaattgct | ggctagtcca  | ataaataagt  | tcttgcattt  |
| 6421 | gtgttgctgt  | ctcaaatgga  | gaggctgttt | caaaaactat  | gccaagctt   | tttccagatt  |

```

6481 catcaaacgc ttcaacatga ttggggaatt ttttatattc tcccatgtgc ctttgatctt
6541 tatatgaaaa ttgtaaaagc cagatgtgaa actgttttat agtgttttct gtaaattggca
6601 tcttggttaa gttttgaaat acttcttcac acacatacgc atatccggct atttctcgtt
6661 catctagaga acgaaatgag cgtgtatcaa gtttgatag taattgctca acttcacggt
6721 ctgataatct tgccccttca atacgagtag aagaaccaat actttcaatt gttgcaattt
6781 tcttgagcat ttgtaaacgt tctggagcta aattaccaa caattgccat gctcctttaa
6841 attcatcaat ttcagcaac

```

//

```

LOCUS      JAQZAU010000056      8361 bp      dna      linear      ENV 17-MAR-2023
DEFINITION MAG: Wolbachia pipientis isolate wEsol contig_34920, whole genome
            shotgun sequence.
ACCESSION  JAQZAU010000056  JAQZAU010000000
VERSION    JAQZAU010000056.1
DBLINK     BioProject: PRJNA929258
            BioSample: SAMN33142973
KEYWORDS   WGS; ENV; Metagenome Assembled Genome; MAG.
SOURCE     Wolbachia pipientis (insect metagenome)
ORGANISM   Wolbachia pipientis
            Bacteria; Pseudomonadota; Alphaproteobacteria; Rickettsiales;
            Anaplasmataceae; Wolbachieae; Wolbachia.
REFERENCE  1  (bases 1 to 8361)
AUTHORS    Fiutek,N., Couger,B.M., Roy,S., de la Torre,J.R. and Connor,E.F.
TITLE      Genomic assessment of the contribution of the Wolbachia
            endosymbiont of Eurosta solidaginis to gall-induction
JOURNAL    International Journal Molecular Sciences
REFERENCE  2  (bases 1 to 8361)
AUTHORS    Fiutek,N., Couger,B.M., Roy,S., de la Torre,J.R. and Connor,E.F.
TITLE      Direct Submission
JOURNAL    Submitted (10-FEB-2023) Biology, San Francisco State University,
            1600 Holloway Ave, San Francisco, CA 94132, USA
COMMENT    ##Genome-Assembly-Data-START##
            Assembly Date      :: JUN-2019
            Assembly Method    :: FLYE v. 06-2019
            Genome Representation :: Full
            Expected Final Version :: Yes
            Genome Coverage     :: 100.0x
            Sequencing Technology :: Illumina HiSeq; PacBio Sequel
            ##Genome-Assembly-Data-END##
FEATURES   Location/Qualifiers
            source              1..8361
                                /organism="Wolbachia pipientis"
                                /mol_type="genomic DNA"
                                /submitter_seqid="contig_34920"
                                /isolate="wEsol"
                                /isolation_source="galls on Solidago altissima"
                                /host="Eurosta solidaginis MN-2018-EFC"
                                /db_xref="taxon:955"
                                /environmental_sample
                                /country="USA: Cowling Arboretum, Carleton College,
                                Northfield, MN"
                                /lat_lon="44.48 N 93.13 W"
                                /altitude="280 m"
                                /collection_date="2018-11"
                                /metagenome_source="insect metagenome"
                                /note="metagenomic"
            gene                20..274
                                /locus_tag="wEsol_00591"
            CDS                 20..274
                                /locus_tag="wEsol_00591"
                                /codon_start=1

```

```

/translation="MGKAIVCVGDYCSGIPAHVCMGSGSNDVVFVNGRSVCRKGDILTMG
ETLTQGSNSVFNVDIGITRTGDLASCGFHVMSISKNVFAS"
/product="PAAR
domain-containing protein"
/besthit="qcoverage 100 , hcoverage 100 , similarity 100
, identity 100 , evaluate 9.03e-34 , alnlength 84 ,
Bacteria , Proteobacteria , WP_197907399.1 MULTISPECIES:
PAAR domain-containing protein [unclassified Wolbachia]"
gene 277..612
/locus_tag="wEsol_00592"
CDS 277..612
/locus_tag="wEsol_00592"
/codon_start=1
/translation="MKGMSKETGKELEGIEHLKQSIIDILTPIGSRVMRRDYGSRL
ELVDKPINRDLTLEIYAABAEALQKLEQRFKLEKVKITEVKEGKVNISLDGIYLPNGK
NIHFGGIVV"
/besthit="qcoverage 100 , hcoverage 100 , similarity 100
, identity 100 , evaluate 1.09e-69 , alnlength 111 ,
Bacteria , Proteobacteria , WP_197907398.1 MULTISPECIES:
GPW/gp25 family protein [unclassified Wolbachia]"
/cog="COG3628 COG3628 116 Phage baseplate assembly
protein W"
/pfam="DUF2634 GPW_gp25 Pfam-B_2001"
/product="GPW/gp25 family
protein"
/translation="MKGMSKETGKELEGIEHLKQSIIDILTPIGSRVMRRDYGSRL
ELVDKPINRDLTLEIYAABAEALQKLEQRFKLEKVKITEVKEGKVNISLDGIYLPNGK
NIHFGGIVV"
/besthit="qcoverage 100 , hcoverage 100 , similarity 100
, identity 100 , evaluate 1.09e-69 , alnlength 111 ,
Bacteria , Proteobacteria , WP_197907398.1 MULTISPECIES:
GPW/gp25 family protein [unclassified Wolbachia]"
gene 615..1337
/locus_tag="wEsol_00593"
CDS 615..1337
/locus_tag="wEsol_00593"
/codon_start=1
/translation="MEQPNIIEPLNFNDPAIKVLEVAAWRELLLRERINEAVKSNLLK
FAGGEDLDRLAEFYGVEREKEEDDERFRKRIKARIVGWSTGGNYRFQALSADRRVKDA
LVESKVPGSVEISILSTELSTNGIASSEELLDIVGKQVTRDDIRVLDTITVVCNII
INIHSRISIKRPDIETVKKKFIEKFETTKRLGWKVTRSWIIANLFVEGVENVELIEP
REDVVVLGNECAALRSLNVELN"
/product="baseplate J/gp47 family protein"
/besthit="qcoverage 109.583333333333 , hcoverage 100 ,
similarity 91.3 , identity 91.3 , evaluate 2.80e-156 ,
alnlength 263 , Bacteria , Proteobacteria ,
WP_209452514.1 baseplate J/gp47 family protein [Wolbachia
endosymbiont of Ceratosolen solmsi]"
/translation="MEQPNIIEPLNFNDPAIKVLEVAAWRELLLRERINEAVKSNLLK
FAGGEDLDRLAEFYGVEREKEEDDERFRKRIKARIVGWSTGGNYRFQALSADRRVKDA
LVESKVPGSVEISILSTELSTNGIASSEELLDIVGKQVTRDDIRVLDTITVVCNII
INIHSRISIKRPDIETVKKKFIEKFETTKRLGWKVTRSWIIANLFVEGVENVELIEP
REDVVVLGNECAALRSLNVELN"
/product="baseplate J/gp47 family protein"
/besthit="qcoverage 109.583333333333 , hcoverage 100 ,
similarity 91.3 , identity 91.3 , evaluate 2.80e-156 ,
alnlength 263 , Bacteria , Proteobacteria ,
WP_209452514.1 baseplate J/gp47 family protein [Wolbachia
endosymbiont of Ceratosolen solmsi]"
gene 1337..2488

```

CDS  
 /locus\_tag="wEsol\_00594"  
 1337..2488  
 /locus\_tag="wEsol\_00594"  
 /codon\_start=1  
 /transl\_table=11  
 /pfam="Pfam-B\_16372 Tail\_P2\_I"  
 /fullproduct="qcoverage 100 , hcoverage 100 , similarity 100 , identity 100 , evaluate 6.01e-288 , alnlength 383 , Bacteria , Proteobacteria , WP\_209452515.1 phage tail protein [Wolbachia endosymbiont of Ceratosolen solmsi]"  
 /translation="MLLPNATKQEKALVDAVDYKVDPGCIRGFKFSPGKVLPIIEEYGLGEILHWVTDKRKAIKEGIKFQRLRGTPESLKIALKWANIEDITIEEPPGKHFFELQVGIRDVPFVDAVVELAKLSLPARSRLMRLFNDHYNIGRFILDESFFGSLLSDYSGVKIEKDGPVLSFGRVNFFRSSGPVIRIENYLRLDHYERALSNDIYRLDVAILGETEPHTKNYNGIYERNHVWYNFKALYPLPQSLLPAIKFAKAQIVLSDSWNLGEINACFPVTGIEEEDKFLLGSSKLSEQLWNLKYKPILERFSVTHHYKVEDFTNQKVIRFGLAEHNVHVESDLNSEQKDSIHEPENYILVFYPGVLTWHEHRHLNRSWEEKQVICLMS"  
 /product="phage tail protein"  
 /besthit="qcoverage 100 , hcoverage 100 , similarity 100 , identity 100 , evaluate 6.01e-288 , alnlength 383 , Bacteria , Proteobacteria , WP\_209452515.1 phage tail protein [Wolbachia endosymbiont of Ceratosolen solmsi]"

gene  
 2662..3144  
 /locus\_tag="wEsol\_00595"

CDS  
 2662..3144  
 /locus\_tag="wEsol\_00595"  
 /codon\_start=1  
 /transl\_table=11  
 /product="hypothetical protein"  
 /pfam="Ank\_4 Ank\_2 Pfam-B\_14646 Ank Ank\_3 Ank\_4 Ank\_5 Pfam-B\_10896 Ank\_2 Ank Ank\_3 Ank\_4 Ank\_2 Ank\_5 Ank Ank\_3 Ank\_4"  
 /translation="MWISQEERDDFNELFQELLAGKLSKKHINRKNENGETMLHRAAKMSTRKKVNWLIWEGADVVDARDNEGYPHLHLAALGMRLNVKELIEARADINATEEDGNTALHLACMVGKKIVEELIKAGAEINRVSISGFSPMYASDEEISEVLKKNNGGKIVNK"  
 /cog="Arp COG0666 235 FOG: Ankyrin repeat"  
 /besthit="qcoverage 100 , hcoverage 79.6019900497513 , similarity 100 , identity 99.4 , evaluate 3.48e-49 , alnlength 160 , Bacteria , Proteobacteria , WP\_174515614.1 ankyrin repeat domain-containing protein [Wolbachia endosymbiont of Cardiocondyla obscurior]"

gene  
 3154..3267  
 /locus\_tag="wEsol\_00596"

CDS  
 3154..3267  
 /locus\_tag="wEsol\_00596"  
 /codon\_start=1  
 /transl\_table=11  
 /product="hypothetical protein"  
 /translation="MEKISKVSEKQVVNGGKKLNDREKLTTAGGRFNRLSI"  
 /besthit="qcoverage 100 , hcoverage 18.407960199005 , similarity 100 , identity 100 , evaluate 1.55e-13 , alnlength 37 , Bacteria , Proteobacteria , WP\_174515614.1 ankyrin repeat domain-containing protein [Wolbachia endosymbiont of Cardiocondyla obscurior]"

gene  
 3444..4025  
 /locus\_tag="wEsol\_00597"

CDS  
 3444..4025  
 /locus\_tag="wEsol\_00597"  
 /codon\_start=1

```

/transl_table=11
/fullproduct="qcoverage 100 , hcoverage 100 , similarity
100 , identity 100 , evalue 1.78e-103 , alnlength 193 ,
Bacteria , Proteobacteria , WP_197907395.1 ankyrin repeat
domain-containing protein [Wolbachia endosymbiont of
Kradibia gibbosae]"
/cog="Arp COG0666 235 FOG: Ankyrin repeat"
/pfam="Ank_4 Pfam-B_10896 Ank_2 Ank Ank_3 Ank_4 Ank_5
Ank_4 Ank_3 Ank Ank_2 Ank_5 Ank Ank_4 Ank_3 Pfam-B_19574"
/product="ankyrin repeat domain-containing
protein"
/translation="MVKFSKKEREEFNKSWKEVLDPNPIENINKKDKTKGRTILHYAVGM
LDPKKVRLLEIEKGADLDAADAGKYRPLHLAVMGQRLENIKELIKAGVEVNVVERSSKF
AALHLACMVSEVKIVEELVKAGANVEQKDKYGKTPMDYARNNKEIKEVLENVKMANQ
REFIERIRVSESTTAGVIAAKEELETVDKVL"
/besthit="qcoverage 100 , hcoverage 100 , similarity 100
, identity 100 , evalue 1.78e-103 , alnlength 193 ,
Bacteria , Proteobacteria , WP_197907395.1 ankyrin repeat
domain-containing protein [Wolbachia endosymbiont of
Kradibia gibbosae]"
gene 4068..4499
/locus_tag="wEsol_00598"
CDS 4068..4499
/locus_tag="wEsol_00598"
/codon_start=1
/transl_table=11
/pfam="DUF2924"
/fullproduct="qcoverage 100 , hcoverage 100 , similarity
100 , identity 100 , evalue 3.67e-90 , alnlength 143 ,
Bacteria , Proteobacteria , WP_197907394.1 MULTISPECIES:
DUF2924 domain-containing protein [unclassified
Wolbachia]"
/translation="MEKKVEKEVKCLEKKPLAELKKIWKKVFEEEEAPRHSKKYLIPRL
AYRLQEKAYGEISRKGAKRLEYLADRLEKGKRISDCLPVEGTELILERGEVHVVMV
TNTGLIYREEFYTSLSAVAGKIMGMSYNGPLLFGMRDKKVS"
/product="DUF2924
domain-containing protein"
/besthit="qcoverage 100 , hcoverage 100 , similarity 100
, identity 100 , evalue 3.67e-90 , alnlength 143 ,
Bacteria , Proteobacteria , WP_197907394.1 MULTISPECIES:
DUF2924 domain-containing protein [unclassified
Wolbachia]"
gene 4510..6033
/locus_tag="wEsol_00599"
CDS 4510..6033
/locus_tag="wEsol_00599"
/codon_start=1
/transl_table=11
/pfam="Resolvase Recombinase Zn_ribbon_recom Pfam-B_11632
Pfam-B_1335 Botlp Pfam-B_16452"
/fullproduct="qcoverage 100 , hcoverage 100 , similarity
100 , identity 100 , evalue 0.0 , alnlength 507 ,
Bacteria , Proteobacteria , WP_209452274.1 recombinase
family protein [Wolbachia endosymbiont of Ceratosolen
solmsi]"
/translation="MLKEVRCAIYTRKSNEGLEQKFNSLDAQRVACEKYIKSREGWV
ALAKRYDDGGYSGSNLNRPAIKELFEDVKAGEVDCVVVYTLDRLSRETKDCIEVTSFF
RRHRISFVAVTQIFDNNTPMGKFVQTVLSGAAQLEREMIVERVKNKIATSKEEGLWMG
GNPPLGYDVKDKELIINEKEAKVIKHFERYMELKSMALARELNREGYRTKKFEAKS
GKVYGGEIFKKATVRRRIITNPIYMGKTRHYEKQYKGKHEAIIIEEEKWKKAEQELIKDQP

```

YRKAKYEEALLKGIICKSCDVNMTLTYSKKENKRYRYYYVCNNHLRGKDCESGNRNVI  
AGEVEKEVMKRAERLYENWERGEEKWENLSFGKQKEVVKKLVKGMVKEDGIEVHSES  
EKTFIAMNLKKKGKCTVVEPEGKTNALLKAVVRAHLWKRQLEERKYASLKELSVKI  
NIGTRRIQQILRLNLYLAPKIKEDIVNGRQPSNLRLLVDLREIPTLWSEQMEKFYGLVS"  
/product="recombinase family protein"  
/besthit="qcoverage 100 , hcoverage 100 , similarity 100  
, identity 100 , evalue 0.0 , alnlength 507 , Bacteria ,  
Proteobacteria , WP\_209452274.1 recombinase family  
protein [Wolbachia endosymbiont of Ceratosolen solmsi]"  
gene 6065..6802  
/locus\_tag="wEsol\_00600"  
CDS 6065..6802  
/locus\_tag="wEsol\_00600"  
/codon\_start=1  
/transl\_table=11  
/fullproduct="qcoverage 100 , hcoverage 100 , similarity  
100 , identity 100 , evalue 8.48e-155 , alnlength 245 ,  
Bacteria , Proteobacteria , WP\_206759920.1 hypothetical  
protein [Wolbachia endosymbiont of Kradibia gibbosae]"  
/translation="MKTPKKIWKSIKKFKNSTAAKANVSSSADKDILEEGKKLSEEV  
LNKEVTIKQQVVTGKTESVSLIQDTASIIGNIETPADAYENS NKSSLEEFIEHKPCEN  
SNESNTIAIEHIATSIEKLDNTGICEKNETAVTETDIQEQNASNSLSSAACFDNGSSK  
ENTADKKEKPSMQQRQAILAGVVGAALLVSSIIAYLLKMYAIAVIGGIVGLACVSYAL  
YSVLKPNTKLEKVEEQSITAHPLNPT"  
/product="hypothetical protein"  
/besthit="qcoverage 100 , hcoverage 100 , similarity 100  
, identity 100 , evalue 8.48e-155 , alnlength 245 ,  
Bacteria , Proteobacteria , WP\_206759920.1 hypothetical  
protein [Wolbachia endosymbiont of Kradibia gibbosae]"  
gene complement(6924..>8361)  
/locus\_tag="wEsol\_00601"  
CDS complement(6924..>8361)  
/locus\_tag="wEsol\_00601"  
/codon\_start=1  
/transl\_table=11  
/product="hypothetical protein"  
/pfam="HrpB7 Baculo\_PEP\_C Pfam-B\_8957 Pfam-B\_13482  
Pfam-B\_15144"  
/translation="EQGNTQLIDLFSQSQKKESVPLSSEQNFEESSDDEFYDAEESILK  
GASEDESEVNTQQATVEESSNGQSGDQKSPEPESTGSQQIEKNVLSSTKESNTINNVG  
TSMEEPVSND FSEGKMPTNTQQVGSSLGQEEPENMRNQLEKLQKELNEKTQALESTKT  
QLAEKEEKLKGAQVQLETKEAELQNELTEKDVQLKNAQAQLEQEKTKLQDALKKKEEE  
LESKIGKVTKLNGTIEKLEAQLKEQKGELDSTRQDLDSKTSEVTKLITKIEELERTKV  
QLAEKEKALGIVQKSLADEDVKVTQLTSETNKLNATIGTLNTQLTKQKEALGSANQEV  
TRLKNTIEELEGIKNQLTEKEQELNSTKQDLVKKASEVTQLSSENIQLQTQNLNAKNK  
KLLAVSAQSRKQV TYASVSFVLSGAFAVGASLTIPYLAICITFAVAASIFLAVGCYCS  
YKANTALS NVEVKNGIDSA AVEVLNSPS"  
/besthit="qcoverage 100 , hcoverage 44.2592592592593 ,  
similarity 86.8 , identity 86.6 , evalue 1.06e-179 ,  
alnlength 478 , Bacteria , Proteobacteria ,  
WP\_197907392.1 ankyrin repeat domain-containing protein  
[Wolbachia endosymbiont of Kradibia gibbosae]"

# ORIGIN

```

1 aataaatcta aactagtaga tgggtaaagc aatcgtttgt gtaggagatt attgcagtgg
61 aataaccagca catgtttgta tgagtggtag taacgatggt tttgtaaaac gtagatctgt
121 gtgtcgaaaa ggagatatct taactatggg agagacacta acgcaaggat caaacagcgt
181 atttgttaat gatattggca taacaagaac cggtgacttg gcatcgtgtg gttttcatgt
241 aatgagtatt agcaaaaatg tatttgcgag ctaacaatga aagggatgag caaagaaaca
301 ggtaaagaat tagaaggaat agaacatctg aaacaatcaa taattgatat actgaccaca
361 ccgataggat cacgtgttat gcgaagggat tatgggtcaa gactacttga attagtagat

```

|      |             |             |             |             |             |             |
|------|-------------|-------------|-------------|-------------|-------------|-------------|
| 421  | aagccaatta  | atagggattt  | aacttttgaa  | atctatgcag  | cagtagcaga  | agctctacaa  |
| 481  | aagttggagc  | aaagatttaa  | gttagaaaa   | gtaaaaatta  | cagaagtga   | agaaggaaag  |
| 541  | gtcaatat    | cattagatgg  | tatttatcta  | ccaaatggaa  | aaaatattca  | ttttggtggg  |
| 601  | attgtggtat  | agagatggag  | cagcctaaca  | ttattgagcc  | actgaacttt  | aatgatccag  |
| 661  | caataaaggt  | tttagaagta  | gcagcatggc  | gagaactttt  | gctgagagaa  | agaataaacg  |
| 721  | aagcggtaaa  | aagtaattta  | cttaagttcg  | caggaggaga  | agacttagat  | cgtttagctg  |
| 781  | agttttacgg  | agttgagaga  | gaaaaagaag  | aagatgacga  | acgatttaga  | aaaagaatca  |
| 841  | aggcaagaat  | agttggctgg  | agcactggag  | gaaattatag  | gtttcaagca  | ctctcagcag  |
| 901  | atagaagagt  | aaaggatgcg  | ctagttgaat  | caaaagtgcc  | aggaagtgt   | gagatctcga  |
| 961  | ttttatccac  | ggagttatcc  | acaaatggca  | tagcgtctga  | agaactactt  | gatattgtag  |
| 1021 | gaaagcaagt  | caccagggat  | gatataaggg  | tattaacaga  | tacgataaca  | gtagttggtt  |
| 1081 | gcaatattat  | tgaaataaat  | atccacagca  | gaattagtat  | taaaagacca  | gatattattg  |
| 1141 | aaacggtgaa  | gaagaaat    | atagaaaaat  | ttgaaacaac  | gaaaagattg  | ggatggaagg  |
| 1201 | tgacaagatc  | atggattata  | gcgaatttgt  | tcgtagaagg  | agtagaaaac  | gtagaattaa  |
| 1261 | tagagccaag  | agaggatggt  | gtggtattgg  | ggaatgagtg  | tgctgcctta  | agaagtttaa  |
| 1321 | atgttgagtt  | gaattaatgc  | tattaccacc  | aaatgcaaca  | aaacaagaaa  | aagcgtggtt  |
| 1381 | tgatgcagta  | gattacaaag  | tagatcctgg  | ttgtatcaga  | gggttttaaat | ttagcccagg  |
| 1441 | ggaaaaagta  | ttaccatgga  | taattgaaga  | gtacgggctg  | ggagaaatcc  | tgcattgggt  |
| 1501 | aacagacaaa  | agaaaagcga  | taaaagaagg  | gataaaat    | caaagactgc  | gtggcacacc  |
| 1561 | agaatcactt  | aaaatagcat  | taaaatgggc  | aaatatagaa  | gatattacga  | tcattgaaga  |
| 1621 | gccacccggt  | aaacactttt  | ttgagttgca  | ggtagggata  | agagatgtac  | cgttcgtaga  |
| 1681 | tgcagtagta  | gaactagcaa  | aactatcatt  | gccagcaaga  | tcgaggctaa  | tgaggctttt  |
| 1741 | caatgaccac  | tataatattg  | gaagatttat  | tttagatgaa  | agcttttttg  | gcagtttgtt  |
| 1801 | atcggattat  | tcaggggtaa  | aaatagaaaa  | agatggacca  | gtattatcat  | ttggaagagt  |
| 1861 | aaatTTTTTc  | aggtctagtg  | gtccagttat  | taggattata  | gaaaactatc  | tacgcgatca  |
| 1921 | ttatgaacga  | gctttaagca  | atgacatata  | tcgcttggt   | gtagcaatcc  | ttggagaaac  |
| 1981 | cgagcctcat  | actaagaact  | ataacggtat  | ttatgaaaga  | aatcatgtgt  | ggtataactt  |
| 2041 | caaagcgcta  | tatccgctac  | cacagagctt  | actaccggca  | attaagtttg  | ctaaagcgca  |
| 2101 | gatagtatta  | tcagatagct  | ggaacttagg  | agaaataaac  | gcatgttttc  | cggttactgg  |
| 2161 | tatagaagag  | gaaggggata  | aattttttatt | gggaagtagc  | aaactatctg  | aacaactgtg  |
| 2221 | gaatTTTaaa  | tacaagccaa  | ttttagaaag  | gtttagcgtt  | actcaccact  | acaaggtaga  |
| 2281 | agatTTTtacc | aacccaaaaag | ttataagatt  | tggttttagca | gaacacaatg  | ttcattttga  |
| 2341 | aagcgatttta | aattcagagc  | aaaaggattc  | aatacatgaa  | ccggaaaaatt | acatttttagt |
| 2401 | gtttttaccca | ggtgtactaa  | cgtggcacga  | acatcgacat  | ttgaacagaa  | gttgggaaga  |
| 2461 | aaaacaggtc  | atatgttttaa | tgagttaa    | atatatactt  | atatcttcat  | acactacatt  |
| 2521 | aacattcggt  | aaaaatgtgt  | gttttttgaa  | aaaaagaagt  | tgctttttcca | tgccaaaaca  |
| 2581 | gctataaatt  | aggtaggtgt  | aggtaaacaa  | aaaagattta  | ccaaacgcta  | gaagttagga  |
| 2641 | agtttttatag | tgagggtacat | catgtggatt  | agtcaagaag  | aaagggatga  | ttttaatgaa  |
| 2701 | ttattttcaag | agttgcttgc  | aggcaaattg  | tctaaaaagc  | atataaatag  | aaaaaatgaa  |
| 2761 | aacggtgaaa  | caatgttgca  | ccgagcagca  | aaaatgtcga  | cgagaaaaaa  | agtaaaactgg |
| 2821 | ctgatatggg  | aaggagcaga  | tgtagatgca  | agagataacg  | aaggttatac  | accactgcac  |
| 2881 | ttagcagcgc  | ttggaatgcg  | tctggaaaac  | gtaaaagaat  | taatagaagc  | cagagcagat  |
| 2941 | ataaacgcaa  | ctgaagaaga  | tggaaatacg  | gcactacatc  | tagcgtgtat  | ggtaggtgga  |
| 3001 | aaaaagatag  | tagaagagtt  | aataaaaagca | ggggcagaaa  | taaaccgggt  | aagtatatca  |
| 3061 | ggatttagcc  | caatgtatta  | cgcaagtgat  | gaagagataa  | gcgaggtgtt  | aaagaaaaat  |
| 3121 | ggaggaaaaa  | tagtgaataa  | atagagggag  | ttaatggaaa  | aaataagtaa  | ggtatcggaa  |
| 3181 | aagcaggtgg  | taaatggtgg  | aaagaagcta  | aatgatagag  | aaaagctgac  | aacagcagga  |
| 3241 | ggtagatttta | atagattaa   | tatatagatt  | tatatcttaa  | tataatatgc  | ggaaaaaatg  |
| 3301 | tgtatatTTTT | gtaaaaaaa   | acttgctttt  | tatgccaaaa  | cagccctaag  | tgaaaaagta  |
| 3361 | gctagtaaac  | aaacaagatt  | tgctaagcgc  | taaagtgagc  | caaattggag  | ccactttata  |
| 3421 | ttgtattaat  | agctgaggaa  | cttatggtaa  | aatttagtaa  | gaaagaaaga  | gaagaattta  |
| 3481 | ataagtcgtg  | gaaagaagta  | ttagataacc  | caatagaaaa  | tattaataaa  | aaagacacaa  |
| 3541 | aaggaaggac  | gatattacat  | tatgcagtag  | ggatgctaga  | tccaaaaaaa  | gtgaggttat  |
| 3601 | taatcgaaaa  | aggagcagat  | ttagatgcag  | cagatgccgg  | gaaatataga  | ccactacacc  |
| 3661 | tagcagtgat  | ggggcaacgt  | ctagaaaata  | taaaagagct  | gataaaggcg  | ggagtagagg  |
| 3721 | taaacgtagt  | ggaacgtagt  | agcaaatttg  | ccgcgttaca  | cctggcatgc  | atggtcagtg  |
| 3781 | aggtaaaaat  | agtagaagaa  | ctagtaaaaag | cgggagcaaa  | tgtagagcaa  | aaggataaat  |
| 3841 | atggcaaaac  | cccaatggat  | tatgcgagaa  | ataataaaga  | gataaaagaa  | gtgttagaga  |
| 3901 | acgtaaaaat  | ggcaaataaa  | cagagagagt  | ttatagaaag  | aataagggtt  | gtatcggaag  |
| 3961 | gtacgacagc  | aggtgtgata  | gcggcaaaag  | aagagctaga  | aactgtggat  | gagaaagtgc  |

|      |             |             |             |             |             |             |
|------|-------------|-------------|-------------|-------------|-------------|-------------|
| 4021 | tatagcgttt  | aaaaattcag  | aagggtctgtg | tttgaaaagg  | tgatcatatg  | gaaaaaaaaag |
| 4081 | tagaaaaaga  | ggtaaaatgc  | ttagagaaaa  | aaccactagc  | agaactgaaa  | aaaatatgga  |
| 4141 | agaaggtatt  | tgaggaagaa  | gcacctagac  | actcaaagaa  | atacctgata  | ccgaggttag  |
| 4201 | catataggtt  | acaggagaaa  | gcgtatggag  | aaatatcaag  | aaaaggggca  | aaaagactag  |
| 4261 | aatatctagc  | agatcgacta  | gagaagggaa  | aaagaataag  | tagtgacaaa  | ctgccagtag  |
| 4321 | agggaaacaga | gttaatatata | gagagaggag  | aagaagtcca  | cgttgtaatg  | gtaacaaata  |
| 4381 | caggttttgat | ctaccgagaa  | gagttttata  | cgtcattatc  | agcggtagcc  | ggaaaaataa  |
| 4441 | tgggaatgag  | ctacaacggt  | cctttattat  | ttgggatgcg  | tgataaaaaag | gtaagttgag  |
| 4501 | ggggagaaaa  | tgctaaaaga  | ggtaaggtgt  | gcgatatata  | cgagaaaatc  | aaatgaagac  |
| 4561 | gggctagagc  | agaagttaa   | tagtcttgat  | gcacagcgag  | tagcatgtga  | aaaatatata  |
| 4621 | aaaagccgag  | aagggtgggt  | agcattagcc  | aaaagggtatg | atgatggagg  | ctattcagga  |
| 4681 | agtaatttaa  | atagaccagc  | gataaaggaa  | ttatttgaag  | atgtaaaagc  | cggagaggta  |
| 4741 | gactgcgtgg  | tagtatacac  | gttggacagg  | ttatcaaggg  | aaacgaagga  | ttgcatagaa  |
| 4801 | gtaacgtcat  | tttttagaag  | gcaccggata  | agttttgtag  | cagtgcgcga  | aatatattgat |
| 4861 | aacaacacac  | caatgggaaa  | atttgtgcaa  | acagtgttat  | caggagcagc  | acaactagaa  |
| 4921 | agagaaatga  | tagtagagag  | agtaaaaaat  | aaaatagcaa  | catcgaaaga  | ggaaggatta  |
| 4981 | tggatgggag  | gaaatccacc  | actcggctat  | gatgtaaaag  | ataaggaatt  | aataataaat  |
| 5041 | gagaaagaag  | caaaggtaat  | aaagcacata  | tttgaaaggt  | atatggagct  | gaaatcaatg  |
| 5101 | gcagaattgg  | caagagagtt  | aaacagagaa  | ggatatcgaa  | cgaagaagtt  | tgaagcaaaa  |
| 5161 | tcgggaaaaag | tatatggagg  | agagatat    | aagaaagcaa  | cggttaaggag | aataataaca  |
| 5221 | aaccctatat  | atatgggaaa  | aacaagacat  | tacgagaaac  | aatataaagg  | aaagcatgaa  |
| 5281 | gcgataatag  | aagaagaaaa  | atggaagaag  | gcacaggaat  | taataaagga  | tcagccgtat  |
| 5341 | agaaaagcaa  | aatatgaaga  | ggcgctacta  | aagggaataa  | taaagtgcaa  | gagctgtgat  |
| 5401 | gtaaacaatga | cgctgacata  | ctcaaaaaaa  | gaaaataaaa  | ggtaccgata  | ttacgtgtgc  |
| 5461 | aataatcatt  | tgaggggaaa  | ggattgtgaa  | tcaggaaacc  | gaaatgtaat  | agccggagaa  |
| 5521 | gtagagaaag  | aagtgatgaa  | gagagctgaa  | cgcttatatg  | aaaattggga  | aagaggggaa  |
| 5581 | gaaaaatggg  | aaaatttaag  | ttttggaaaa  | cagaaagaag  | tggtgaagaa  | attagtaaag  |
| 5641 | ggagtaatgg  | taaaagaaga  | tggaatagag  | gtgcattctg  | agtcagagaa  | gacatttata  |
| 5701 | gcaatgaatt  | taaagaagaa  | aggaaacaaa  | tgcacagtag  | tagaaccaga  | agggaaaaaca |
| 5761 | aacaatgcgc  | tactgaaagc  | agtggtaaga  | gcccattctgt | ggaaacgtca  | actagaggaa  |
| 5821 | agaaaatatg  | caagtctgaa  | ggagctgagc  | gttaaaaatta | atataggtac  | aaggcgcata  |
| 5881 | caacaaat    | taaggttaaa  | ttatttagct  | ccaaagatca  | aagaagacat  | agtaaatggg  |
| 5941 | agacaaccaa  | gtaatttgcg  | gttagttgat  | ttaagggaaa  | taccgacgct  | gtggagttag  |
| 6001 | cagatggaaa  | aatttttatgg | attagtgtcg  | taacgtttat  | aaaagcaaca  | agaggaaaaa  |
| 6061 | aactatgaaa  | acaccgaaaa  | aaatatggaa  | aagtattgct  | aaaaaattca  | aaaatagcac  |
| 6121 | tgccgcaaaa  | gcaaacgttt  | ctagcagtg   | agacaaaagat | atttttagaag | aaggcaaaaa  |
| 6181 | actttcagaa  | gaagttctta  | ataaggaagt  | aaccataaag  | cagcagggtt  | taacaggcaa  |
| 6241 | aactgaaagt  | gtgagtctga  | tccaggatac  | tgcttctata  | atcggttaata | tcgagacacc  |
| 6301 | ggctgacgca  | tatgaaaata  | gtaataaaaag | tagtcttgaa  | gaatttatag  | aacataaacc  |
| 6361 | atgcgaaaat  | agtaatgaaa  | gtaatacaat  | agctatagag  | cacatcgcta  | cttcaataga  |
| 6421 | aaagcttgat  | aatactggaa  | tatgcgaaaa  | aatgaaact   | gctgtaacag  | aaactgacat  |
| 6481 | acaagagcaa  | aatgcttcca  | acagcctttc  | ttctgctgca  | tgttttgata  | atgggtctag  |
| 6541 | caaagaaaat  | actgcagaca  | aaaaagaaaa  | accatcaatg  | caacaaaggc  | aagcaatcct  |
| 6601 | ggctggtggt  | gttggtgctg  | cattactagt  | cagtagtatc  | atagcttatt  | tattgaaaat  |
| 6661 | gtacgccata  | gcggtgattg  | ggggaatagt  | tggattagct  | tgtgtgagtt  | atgcgttgta  |
| 6721 | tagtgtgcta  | aagccgaata  | caaagcttga  | gaaagtagag  | gaacaatcga  | ttactgctca  |
| 6781 | tcctcctttg  | aatccaacat  | aaaaggccat  | gtccaaaaaa  | ccataaatgt  | caagaaagtt  |
| 6841 | tttaataaag  | ataacttatt  | tagaagaatc  | tctaaattat  | taacttaata  | cctaaacaat  |
| 6901 | tattctat    | ctgctatcct  | ttctcaactt  | gggctattta  | aaacttccac  | agccgcagaa  |
| 6961 | tcaataccat  | ttttaacttc  | aacattacta  | agcgtgtat   | ttgccttata  | cgaacagtaa  |
| 7021 | catcctactg  | caagaaaaat  | cgatgcagct  | acagcaaatg  | taatacatat  | cgctaaataa  |
| 7081 | ggtattgtta  | aacttgcacc  | aacagcaaat  | gccccagata  | atacaaaaaga | aacagaggca  |
| 7141 | taggttactt  | gctttctact  | ctgagcgctt  | actgctaaga  | gttttttgtt  | tttagcattc  |
| 7201 | agatttttgag | tttgaagttg  | gatattttct  | gatgaaagtt  | gagttacttc  | actagctttt  |
| 7261 | ttaaccaagt  | cttgctttgt  | actatttcagc | tcttgctctt  | tttctgtgag  | ttgatttttt  |
| 7321 | atgccttcaa  | gttcttctat  | agtattttta  | agtcgagtta  | cttcttgatt  | tgcactacct  |
| 7381 | agtgccttct  | tctgctttgt  | aagttgggtg  | tttagtgtcc  | ctatagtagc  | gttaagtttg  |
| 7441 | tttgtttcac  | tagtaagttg  | agttacttta  | acatcttcgt  | cagccaagct  | tttctgtacg  |
| 7501 | atacccaacg  | ctttctcttt  | ctctgcgagt  | tgaacttttg  | ttctctcaag  | ttcctcaatc  |
| 7561 | tttgttataa  | gcttagttac  | ttcgctagtt  | ttgctatcca  | agtcttgctt  | tgtactatcc  |

```

7621 agctctccct tctgctcttt gagctgagct tctaacttct ctatagtacc attaagcttg
7681 gttacttttc caattttgct ttccagctct tcttctttct tcttgagtgc atcttgacgt
7741 tttgttttct cttgctctaa ttgagcttgt gcattcttta gctgcacatc tttctctgtg
7801 agttcatttt gtagttctgc ttcccttgtt tctaattgaa cttgtgcacc cttcagcttt
7861 tcctctttct ctgcaagctg agttttcgtg ctttcaagtg cctgagtttt ttcattcaat
7921 tcttttttga gcttttcaag ctgatttctc atattctcag gttcctcttg tcctaagtga
7981 cttccgacct gctgtgtgtt tgtaggcatt ttaccctcac tgaaatcatt gcttacaggt
8041 tcctccattg aagtccttac attatttatt gtattacttt cttttgttga tgaaagaaca
8101 ttttttttcta tctgttggtt gccagttctt tcagggttctg gacttttttg atcgctgat
8161 tgaccgttac tactttcttc aactgttgct tgtgtgtgat tgacttcaga ctcatttca
8221 ctagcacctt tcagtatact ttcttctgca tcatagaatt catcatcact ctcttcaaaa
8281 ttttggtcac tactaagtgg aacagactct tttttttgtg attgactaaa tagatctata
8341 agctgagtat taccttgctc a

```

//

```

LOCUS      JAQZAU010000057          23382 bp    dna        linear    ENV 17-MAR-2023
DEFINITION MAG: Wolbachia pipientis isolate wEsol contig_35600, whole genome
            shotgun sequence.
ACCESSION  JAQZAU010000057  JAQZAU010000000
VERSION    JAQZAU010000057.1
DBLINK     BioProject: PRJNA929258
            BioSample: SAMN33142973
KEYWORDS   WGS; ENV; Metagenome Assembled Genome; MAG.
SOURCE     Wolbachia pipientis (insect metagenome)
ORGANISM   Wolbachia pipientis
            Bacteria; Pseudomonadota; Alphaproteobacteria; Rickettsiales;
            Anaplasmataceae; Wolbachieae; Wolbachia.
REFERENCE  1  (bases 1 to 23382)
AUTHORS    Fiutek,N., Couger,B.M., Roy,S., de la Torre,J.R. and Connor,E.F.
TITLE      Genomic assessment of the contribution of the Wolbachia
            endosymbiont of Eurosta solidaginis to gall-induction
JOURNAL    International Journal Molecular Sciences
REFERENCE  2  (bases 1 to 23382)
AUTHORS    Fiutek,N., Couger,B.M., Roy,S., de la Torre,J.R. and Connor,E.F.
TITLE      Direct Submission
JOURNAL    Submitted (10-FEB-2023) Biology, San Francisco State University,
            1600 Holloway Ave, San Francisco, CA 94132, USA
COMMENT    ##Genome-Assembly-Data-START##
            Assembly Date          :: JUN-2019
            Assembly Method        :: FLYE v. 06-2019
            Genome Representation   :: Full
            Expected Final Version :: Yes
            Genome Coverage        :: 100.0x
            Sequencing Technology   :: Illumina HiSeq; PacBio Sequel
            ##Genome-Assembly-Data-END##
FEATURES   Location/Qualifiers
            source                  1..23382
                                     /organism="Wolbachia pipientis"
                                     /mol_type="genomic DNA"
                                     /submitter_seqid="contig_35600"
                                     /isolate="wEsol"
                                     /isolation_source="galls on Solidago altissima"
                                     /host="Eurosta solidaginis MN-2018-EFC"
                                     /db_xref="taxon:955"
                                     /environmental_sample
                                     /country="USA: Cowling Arboretum, Carleton College,
                                     Northfield, MN"
                                     /lat_lon="44.48 N 93.13 W"
                                     /altitude="280 m"
                                     /collection_date="2018-11"
                                     /metagenome_source="insect metagenome"

```

```

gene      /note="metagenomic"
          <1..1003
          /locus_tag="wEsol_00602"
CDS       <1..1003
          /locus_tag="wEsol_00602"
          /codon_start=1
          /transl_table=11
          /fullproduct="qcoverage 100 , hcoverage 96.8023255813954
, similarity 99.7 , identity 99.7 , evaluate 6.22e-199 ,
alnlength 333 , Bacteria , Proteobacteria ,
WP_015589478.1 MULTISPECIES: hypothetical protein
[unclassified Wolbachia]"
          /translation="DYPELRKAISDIIIESIAQSSQEGKKELFTTLSEQVKGMNLKDLG
LAINDQGLQKEVNKELFIKLIIEEALKDLTSENVNSKIIEEALKSVNQQAISNVINNNK
GPLDNLVNYFKSASANEKIGIASAGMVLGVAFSPILVLATLIALVAIGARYVGIGIGK
AGEKIKEGAIDAGKAVKSLSKNLGDKLPEVGPKKDNFSKLYNSLAQEITGYNMSEEGE
KIKNAQSKAKVIGMLQNEGQRSATQELVKNGTIQNFSEDDMKKLREKGTSTYESDKEA
LEELMEKFQSKIMAIGEGKIEEVEKIVDEKVAAMKPSSHLGISSAARVSEGGITGPS"
          /product="hypothetical protein"
          /besthit="qcoverage 100 , hcoverage 96.8023255813954 ,
similarity 99.7 , identity 99.7 , evaluate 6.22e-199 ,
alnlength 333 , Bacteria , Proteobacteria ,
WP_015589478.1 MULTISPECIES: hypothetical protein
[unclassified Wolbachia]"
gene      complement(1048..1599)
          /locus_tag="wEsol_00603"
CDS       complement(1048..1599)
          /locus_tag="wEsol_00603"
          /codon_start=1
          /transl_table=11
          /fullproduct="qcoverage 100 , hcoverage 100 , similarity
100 , identity 100 , evaluate 1.06e-131 , alnlength 183 ,
Bacteria , Proteobacteria , WP_015589477.1 MULTISPECIES:
5-formyltetrahydrofolate cyclo-ligase [unclassified
Wolbachia]"
          /pfam="5-FTHF_cyc-lig"
          /tigr="TIGR02727 MTHFS_bact 182 5-formyltetrahydrofolate
cyclo-ligase"
          /product="
5-formyltetrahydrofolate cyclo-ligase"
          /translation="MFKDIKQHKKEIREQYRAIRKDIDESYSSYAANSLINLFNQNL
SYVKGKTIAAYIPMDGEINVVPLMHSLLDLKYVAIPNKNKLLKFEEWNKTNEDEVIPDT
IITPVIAFDDHFNRLGFGGGWYDTMIEKLRPLGKIFIGVAYEKQYCKDLPEKHDKQL
DIIITEMCVRCGSGLLKKVDKKE"
          /besthit="qcoverage 100 , hcoverage 100 , similarity 100
, identity 100 , evaluate 1.06e-131 , alnlength 183 ,
Bacteria , Proteobacteria , WP_015589477.1 MULTISPECIES:
5-formyltetrahydrofolate cyclo-ligase [unclassified
Wolbachia]"
gene      complement(1583..2203)
          /locus_tag="wEsol_00604"
CDS       complement(1583..2203)
          /locus_tag="wEsol_00604"
          /codon_start=1
          /transl_table=11
          /pfam="NAD_binding_1"
          /fullproduct="qcoverage 100 , hcoverage 100 , similarity
100 , identity 100 , evaluate 1.36e-143 , alnlength 206 ,
Bacteria , Proteobacteria , WP_015589476.1 MULTISPECIES:
hypothetical protein [unclassified Wolbachia]"

```

```

/translation="MKNIMLIGGGVGNVLF SIGKACLENNNNKVLYFAGYKKLSDFVK
RALIERASNAVWACEEGLIETSRDQDKSFHGNIVDAIVSYQQGRLGINLNVIDKIIT
IGSDKMMKAVNEARKTILKPYLKSSHIAISSVNSPMQCMMEICAQCVQQHINKETGE
RSFVYSCSNQDQDMEFIDFDLSERLKQNSLQEKLTAKWIDHVQRY"
/product="hypothetical protein"
/besthit="qcoverage 100 , hcoverage 100 , similarity 100
, identity 100 , evalue 1.36e-143 , alnlength 206 ,
Bacteria , Proteobacteria , WP_015589476.1 MULTISPECIES:
hypothetical protein [unclassified Wolbachia]"
gene complement(2307..3548)
/locus_tag="wEsol_00605"
CDS complement(2307..3548)
/locus_tag="wEsol_00605"
/codon_start=1
/transl_table=11
/pfam="SurA_N_3 SurA_N SurA_N_2 YbbR"
/fullproduct="qcoverage 100 , hcoverage 100 , similarity
99.3 , identity 97.6 , evalue 1.80e-270 , alnlength 413 ,
Eukaryota , Arthropoda , GFQ68659.1 parvulin-like
peptidyl-prolyl isomerase, SurA,peptidyl-prolyl cis-trans
isomerase SurA [Trichonephila clavata]"
/translation="MVFISIVTEITIKKLASIDSVFIIELVINLTYMHKILILLIVL
PLRLLAIEIEIVADVNGEPISNLDIEKRINFINSLFGTQSV DQKGAKPQILRELIDEI
IIINEAQRLNIKLSNEELDNAIMLFLTQSFKLKANEVDQYIEKHNIDLGILRKQIKCQ
LLWSKIIIEVRIVPFINISDKEVNDVKRQTEKPDYLITFQEFIIIPDQKDKDVYGIAEDL
VKKLRSNNPESPIKMRKATVNLSQLKGKLNKLVLEGLETSDIAGPFSFSEGYSVIKVI
DKVQLNHALLESTLKLKQIVVEGSESLDNLKEQKVNCLNFDKLADNFKLPNAKEFEI
KMRDLNPDQLILFSKTSVNEIVELRENGTAKLMMLCDIKSNVAGIEAIKQKMYQQKIM
IQSNLLDDMRKNAAISYRYS"
/product="parvulin-like peptidyl-prolyl
isomerase, SurA,peptidyl-prolyl cis-trans isomerase SurA"
/besthit="qcoverage 100 , hcoverage 100 , similarity 99.3
, identity 97.6 , evalue 1.80e-270 , alnlength 413 ,
Eukaryota , Arthropoda , GFQ68659.1 parvulin-like
peptidyl-prolyl isomerase, SurA,peptidyl-prolyl cis-trans
isomerase SurA [Trichonephila clavata]"
gene complement(4109..4624)
/locus_tag="wEsol_00606"
CDS complement(4109..4624)
/locus_tag="wEsol_00606"
/codon_start=1
/transl_table=11
/fullproduct="qcoverage 100 , hcoverage 100 , similarity
100 , identity 100 , evalue 2.64e-117 , alnlength 171 ,
Bacteria , Proteobacteria , WP_012673395.1 MULTISPECIES:
inorganic diphosphatase [Wolbachia]"
/cog="Ppa COG0221 171 Inorganic pyrophosphatase"
/pfam="Pyrophosphatase"
/product="inorganic
diphosphatase"
/translation="MDLSKITAGPNAVNVVIEISANAEPVKYEFNKEFGLLQVDRFLS
TSMTYPCNYGFIPNTCAGDGDVPDVLVLTQFPLASSVLISVRPIGALLTKDEKGEDEK
ILAVPVSSVDSYYDNIKDYSDLSKSLLDKITHFFSHYKDLEKGKTVAVGEWVGVEEAK
QIVASSIKSGN"
/besthit="qcoverage 100 , hcoverage 100 , similarity 100
, identity 100 , evalue 2.64e-117 , alnlength 171 ,
Bacteria , Proteobacteria , WP_012673395.1 MULTISPECIES:
inorganic diphosphatase [Wolbachia]"
gene complement(4687..5910)
/locus_tag="wEsol_00607"

```

CDS complement(4687..5910)  
 /locus\_tag="wEsol\_00607"  
 /codon\_start=1  
 /transl\_table=11  
 /fullproduct="qcoverage 100 , hcoverage 100 , similarity 100 , identity 100 , evalue 2.48e-290 , alnlength 407 , Bacteria , Proteobacteria , WP\_015589474.1 MULTISPECIES: hypothetical protein [unclassified Wolbachia]"  
 /translation="MIKEIEELIKIVGKGNLLETFLFIFLGSFQHADLGRFMDHRNHFG LSEFIRKKEEPLDKYFNLKFSLQGLFLIYAQAYQILSENNNLNTKDVIDKIYEVIKGS ELNEYINEVVDGRKLDLLNILANPKREPIFKTEEDFENKVLIGLRKLLSEGNTLNKYD REFALNKCIVIGCYYSIHNIKVDKDIALLFSIGSYKELSPSNKTVRREVLEICENQLI ENYIVHLASKLHMIGLSSRDKYTIDHENVDQRQEKALKMDGLTCPINTKNTLEQLLNQ NSDEFEQLVMSPENIYYSVLPEENEYRPNLITSKKKEKDYKNTVCKLILGMFILSVGL SVADYFLMEQKLLNSIKNVLPQDNLTNLIIGAVLTIVIVYALFQLLKPPQEPLSTVN KMMNENLGPLHAKQA"  
 /product="hypothetical protein"  
 /besthit="qcoverage 100 , hcoverage 100 , similarity 100 , identity 100 , evalue 2.48e-290 , alnlength 407 , Bacteria , Proteobacteria , WP\_015589474.1 MULTISPECIES: hypothetical protein [unclassified Wolbachia]"

gene complement(6709..6807)  
 /locus\_tag="wEsol\_00608"

CDS complement(6709..6807)  
 /locus\_tag="wEsol\_00608"  
 /codon\_start=1  
 /transl\_table=11  
 /fullproduct="qcoverage 100 , hcoverage 103.225806451613 , similarity 90.6 , identity 90.6 , evalue 1.51e-10 , alnlength 32 , Bacteria , Proteobacteria , AAS14905.1 hypothetical protein WD\_1260 [Wolbachia endosymbiont of Drosophila melanogaster]"  
 /translation="MLLTKSFNAECKHTIDFLHNHITLGIETKKLA"  
 /product="hypothetical protein"  
 /besthit="qcoverage 100 , hcoverage 103.225806451613 , similarity 90.6 , identity 90.6 , evalue 1.51e-10 , alnlength 32 , Bacteria , Proteobacteria , AAS14905.1 hypothetical protein WD\_1260 [Wolbachia endosymbiont of Drosophila melanogaster]"

gene complement(6798..7901)  
 /locus\_tag="wEsol\_00609"

CDS complement(6798..7901)  
 /locus\_tag="wEsol\_00609"  
 /codon\_start=1  
 /transl\_table=11  
 /fullproduct="qcoverage 100 , hcoverage 100 , similarity 100 , identity 100 , evalue 1.32e-267 , alnlength 367 , Bacteria , Proteobacteria , WP\_015589473.1 MULTISPECIES: tRNA 2-thiouridine(34) synthase MnmA [unclassified Wolbachia]"  
 /cog="TrmU COG0482 356 Predicted  
 tRNA(5-methylaminomethyl-2-thiouridylate)  
 methyltransferase, contains the PP-loop ATPase domain"  
 /pfam="Asn\_synthase Pfam-B\_78 NAD\_synthase ThiI  
 tRNA\_Me\_trans ExsB Pfam-B\_18759"  
 /tigr="TIGR00420 trmU 351 tRNA  
 (5-methylaminomethyl-2-thiouridylate)-methyltransferase"  
 /product="tRNA  
 2-thiouridine(34) synthase MnmA"  
 /translation="MLKEFEIEPLLKDKAPHQTKAVVAMSGGVDSSVAAALLYNFGYQ

```

VIGVTLQLYGTGDGARKGACCAGQDIYDAKRVAESVGFPHYILNYEEIFKKEVIEDFAS
TYMRGETPIPCVRCNQTVKFRDLLQVTKNLGADVLVTGHYVRRLEKNGEVKLCRSIDK
SKDQSYFLFATTQEQLKLLRFPLGGFYKSDIRKLAKYFGLQISEKPDSQDICFVSESY
SKTIAKLAPQSVQKGKIVDVNGKVLGEHSGIVNFTVGQRKGLGIAHNEPLYVIKINTE
NNEVIVGPIINVLMQKKILIKELNWLEQPKEGMEVTVKLRSSHAGSLATIHSTDEKNKA
CVILNDDYFGISPGQACVAYKDEQVIGGGWICS"
/besthit="qcoverage 100 , hcoverage 100 , similarity 100
, identity 100 , evalue 1.32e-267 , alnlength 367 ,
Bacteria , Proteobacteria , WP_015589473.1 MULTISPECIES:
tRNA 2-thiouridine(34) synthase MnmA [unclassified
Wolbachia]"
gene complement(8104..9180)
/locus_tag="wEsol_00610"
CDS complement(8104..9180)
/locus_tag="wEsol_00610"
/codon_start=1
/transl_table=11
/fullproduct="qcoverage 100 , hcoverage 100 , similarity
100 , identity 100 , evalue 3.01e-248 , alnlength 358 ,
Bacteria , Proteobacteria , WP_141456703.1 MULTISPECIES:
rod shape-determining protein [unclassified Wolbachia]"
/cog="MreB COG1077 342 Actin-like ATPase involved in cell
morphogenesis"
/pfam="MreB_Mbl Actin HSP70 Pfam-B_12247 Pfam-B_178 DDR
EutA Competence_A FtsA"
/tigr="TIGR00904 mreB 334 cell shape determining protein,
MreB/Mrl family"
/product="rod
shape-determining protein"
/translation="MNFVRKLTEKFCSLFTFKGLFASDIAIDLGTANTLVYQKNQGIV
LDEPSVVARIKEKGSYVPIYAFGKKAKMMLGKTPGEIEAIRPLKDGVIADFKSAEEMLK
YFIRSANTKFTVNKPNIIICVPSGSTPVERRAIQDAAESAGANEVFLIEEPMAAAIGA
GLPVTEPEGSMIVDIGGGTTEVAIISLGGIVYSRSARVGGDIMDEAIIKSYIRENHKLL
IGETTAEKIKKSIGSANLPGENNKEGMIKGRDLVSGMPKEMLLSEYQVAESLIEPVH
QIISAIRTALESTPPELSSDIVDKGIILSGGGGLLRNLGKVISETTKLPVRVADDPLC
CVALGSGKVLENMDYFGHVLFKQD"
/besthit="qcoverage 100 , hcoverage 100 , similarity 100
, identity 100 , evalue 3.01e-248 , alnlength 358 ,
Bacteria , Proteobacteria , WP_141456703.1 MULTISPECIES:
rod shape-determining protein [unclassified Wolbachia]"
gene complement(9204..10625)
/locus_tag="wEsol_00611"
CDS complement(9204..10625)
/locus_tag="wEsol_00611"
/codon_start=1
/transl_table=11
/fullproduct="qcoverage 100 , hcoverage 100 , similarity
100 , identity 100 , evalue 0.0 , alnlength 473 ,
Bacteria , Proteobacteria , WP_015589471.1 MULTISPECIES:
Thermostable carboxypeptidase 1 [unclassified Wolbachia]"
/cog="COG2317 COG2317 497 Zn-dependent carboxypeptidase"
/pfam="Peptidase_M32"
/product="Thermostable
carboxypeptidase 1"
/translation="MKSYKFLEEVLYRVKNIENTLKVNLNQSQNLNAEDKVEQMSLLEEI
RHEIISHDVIKESLADALDNKKSADAWQLKLIERIHKSNSAVPIDLVKSLSKAKVECO
SLWRLNNSEASNLEKLKERFTDLITLIREVASIKSQQLKCSKYDSLLADYDSDITEKN
IREVFPKVGKFFSGNVDKIIIEKQKKDKVTNIQKVATQKQIELGSSCLQQMGVALHEVR
TSYYYPIDYDESDFCYGLFSLLRHSGYAIYQKCLAQNSISSPITRHVMYETQGLFMER
MIGTSREFIEFIQPHIKEKFAIKGKTNEKVSSVENLYLIFNEINLSSFLKNADEFSLL

```

```

AHIMLRTRLEQDIINGTLEVKDLHDAWLEGMKHYKIPVKAENELNTYFQDEYWASGVM
GYFPIKIIALIAAVQIFSCVKKNHYESLSAIKGFSLISWLSQNIYSACGLELLK
KVTGKGLDVECCISYLSGKYNLS"
/besthit="qcoverage 100 , hcoverage 100 , similarity 100
, identity 100 , evalue 0.0 , alnlength 473 , Bacteria ,
Proteobacteria , WP_015589471.1 MULTISPECIES:
Thermostable carboxypeptidase 1 [unclassified Wolbachia]"
gene 10901..11380
/locus_tag="wEsol_00612"
CDS 10901..11380
/locus_tag="wEsol_00612"
/codon_start=1
/transl_table=11
/fullproduct="qcoverage 100 , hcoverage 100 , similarity
100 , identity 100 , evalue 6.12e-108 , alnlength 159 ,
Bacteria , Proteobacteria , WP_010081889.1 MULTISPECIES:
OmpA family protein [Wolbachia]"
/cog="OmpA COG2885 190 Outer membrane protein and related
peptidoglycan-associated (lipo)proteins"
/pfam="OmpA"
/product="OmpA family
protein"
/translation="MWSRLVIMCCFCLLLTGVS SCPKKGANTTNKINSVVKQIGDKRV
FFGYDESSIAEVSADALLDVMEVLQDNPD AKVTLTGHTDNRGSHEYNLALGARRADAA
KKFMVSCPTYIENRIKTASKGETEPLVNVKDDSRNSKYEKEHAKNRRVEFSFSGIKK"
/besthit="qcoverage 100 , hcoverage 100 , similarity 100
, identity 100 , evalue 6.12e-108 , alnlength 159 ,
Bacteria , Proteobacteria , WP_010081889.1 MULTISPECIES:
OmpA family protein [Wolbachia]"
gene 11558..12853
/locus_tag="wEsol_00613"
CDS 11558..12853
/locus_tag="wEsol_00613"
/codon_start=1
/transl_table=11
/pfam="Asn_synthase ATP_bind_3 PAPS_reduct"
/fullproduct="qcoverage 100 , hcoverage 100 , similarity
100 , identity 100 , evalue 2.26e-314 , alnlength 431 ,
Bacteria , Proteobacteria , WP_015589470.1 MULTISPECIES:
tRNA lysidine(34) synthetase Tils [unclassified
Wolbachia]"
/translation="MELELLFQNVVNSFAFYNNQVAVAVSGGVDSIILLHLMNNWAKK
NKLPLPIALT VNHGLRSESQKEAD FVVS YAKELGAKESFILNWEKQNIKGNIQLQARK
ARYKLLAEWCNNNVKYL LVAHHKDDQ AETFLRLRERGSGVDGLSSMDYKSFLNGIYI
FRPLLNFSRSEIEKYAKLHRLKWIEDRSNYDLKYRRTLYRNLLKASDNQEILTERICL
TALHMKRAAKALMHYTRLAFNDCVNVHDLGYIEIKLSEFYQLPEEIALRLLYSIMAI
ASKHYKPRYN SLIVIFNKILQKDSNVNCTLSGCKIRKHGENILIIRESSKIQEITLNL
PLNEPTQWDNRFSCTILGNQECSVIIAPLKKTKQVPEFLKDYNCCPEVFYSLPVVLKD
GKVLAYPDVNYNGKNTNDDKVQCIINSTIKQNLVSLISI"
/product="tRNA lysidine(34)
synthetase Tils"
/besthit="qcoverage 100 , hcoverage 100 , similarity 100
, identity 100 , evalue 2.26e-314 , alnlength 431 ,
Bacteria , Proteobacteria , WP_015589470.1 MULTISPECIES:
tRNA lysidine(34) synthetase Tils [unclassified
Wolbachia]"
gene 12866..14704
/locus_tag="wEsol_00614"
CDS 12866..14704
/locus_tag="wEsol_00614"

```

```

/codon_start=1
/transl_table=11
/fullproduct="qcoverage 100 , hcoverage 100 , similarity
100 , identity 100 , evalue 0.0 , alnlength 612 ,
Bacteria;Eukaryota , Proteobacteria;Arthropoda ,
WP_012673393.1 MULTISPECIES: ATP-dependent zinc
metalloprotease FtsH [Wolbachia]"
/cog="HflB COG0465 596 ATP-dependent Zn proteases"
/pfam="FtsH_ext RuvB_N TIP49 IstB_IS21 AAA_5 AAA_22 AAA
AAA_17 Pfam-B_15939 Peptidase_M41"
/tigr="TIGR01241 FtsH_fam 496 ATP-dependent
metallopeptidase HflB"
/product="ATP-dependent zinc
metalloprotease FtsH"
/translation="MKKFLEGLLIWLVIIVLISVAYIQFSGNVGKSKTIIPFSEFLTR
LEDNDVENIVIKNQSIEGKFRDGSSFNSSGVIYSDLIKNLHDKVRFSFSTGDSAMNV
IGLLISWVPTFIFIGFLLFFLKQTQAGNRTISFGKSRARLMTSGKKVTFDDVAGID
EAKEELVEIVDFLKQRQKFQILGGKIPKGCLLIGSPGTGKTLARAIAGEANVPFFSI
SGSDFVEMFVGVGASRVDMFDQGKKNAPCIIFIDEIDAVGRHRGIGLGGGNDEREQT
LNQLLVEMDGFESNEGVIIIAATNRPDVLDLPALLRPGRFDRQITISLPDINGREKILN
THIKKISIAPDVNVKTVARGTPGFSGADLANLVNESALIAARRNKKIVTMDDFEYARD
KVMMGVERRSLIMTEEEKRLTAYHEAGHAMIAVNMPASDPIHKATIIPRGRALGLVMR
LPETDRVSLTREKMLADITVAMGGRVAEELIFGYDKVTSGASSDIKQASDLSRAMVTK
WGMSDKIGPIYHNREQTIHGSEIISEDTLKLIDEEVKKVSSCYEKAKDILTKHKKGL
DLIAENLLEFETLTGDEIKDILNGKKIVREENEKNEKIKKSSLYES"
/besthit="qcoverage 100 , hcoverage 100 , similarity 100
, identity 100 , evalue 0.0 , alnlength 612 ,
Bacteria;Eukaryota , Proteobacteria;Arthropoda ,
WP_012673393.1 MULTISPECIES: ATP-dependent zinc
metalloprotease FtsH [Wolbachia]"
gene 14859..15527
/locus_tag="wEsol_00615"
CDS 14859..15527
/locus_tag="wEsol_00615"
/codon_start=1
/transl_table=11
/fullproduct="qcoverage 100 , hcoverage 100 , similarity
100 , identity 100 , evalue 1.56e-150 , alnlength 222 ,
Bacteria , Proteobacteria , WP_007548786.1 MULTISPECIES:
hypothetical protein [Wolbachia]"
/translation="MIDIASIGVSTVIDQNYRRKAQLCLSGLFVTVSIATVTWVFIFPA
SQNVLAPFLLPAMFLLFTLSMGYYMFIFSCEEKSLVKNVLGMVEPAESVKRVHCQENI
KSLLAEVRSTTKDRFRNVLVNLCFEDRSKAHKLALYVKEIDNIVSSIKNKDLLDHFQD
FFTITEVSNKKNRSELMNLRAYKMISEEDPDKIQDFLATQTKSYSYEIMLPEIDNFL
SQAR"
/product="hypothetical protein"
/besthit="qcoverage 100 , hcoverage 100 , similarity 100
, identity 100 , evalue 1.56e-150 , alnlength 222 ,
Bacteria , Proteobacteria , WP_007548786.1 MULTISPECIES:
hypothetical protein [Wolbachia]"
gene complement(15520..16158)
/locus_tag="wEsol_00616"
CDS complement(15520..16158)
/locus_tag="wEsol_00616"
/codon_start=1
/transl_table=11
/fullproduct="qcoverage 100 , hcoverage 100 , similarity
100 , identity 100 , evalue 3.87e-146 , alnlength 212 ,
Bacteria , Proteobacteria , ACN95910.1 thymidylate kinase
[Wolbachia sp. wRi]"

```

```

/cog="Tmk COG0125 208 Thymidylate kinase"
/pfam="AAA_18 AAA_28 AAA_17 Pfam-B_2168 Thymidylate_kin"
/tigr="TIGR00041 DTMP_kinase 196 thymidylate kinase"
/product="thymidylate kinase"
/translation="MYTVCIFFFSIIIIKLMFITFEGIDGSGKTTQSKLLANHFQIHI
GENNVVLTREPGGTNFAEKIRGVLLTNIDPISELLLLISMRREHMKKLILPALAEGK
IVICDRFIDSTIAYQGYGLSVDLGLIRDLHKLVEIKCPDITFILDIDVKVGLNRAKDK
NKYEEMDVNFYNKVRKGFQEIATKEPVRCSVITGIETKNDNHVHNEIIDKIT"
/besthit="qcoverage 100 , hcoverage 100 , similarity 100
, identity 100 , eval 3.87e-146 , alnlength 212 ,
Bacteria , Proteobacteria , ACN95910.1 thymidylate kinase
[Wolbachia sp. wRi]"
gene 16219..16791
/locus_tag="wEsol_00617"
CDS 16219..16791
/locus_tag="wEsol_00617"
/codon_start=1
/transl_table=11
/pfam="AhpC-TSA Redoxin Thioredoxin_8"
/fullproduct="qcoverage 100 , hcoverage 100 , similarity
100 , identity 100 , eval 1.18e-136 , alnlength 190 ,
Bacteria , Proteobacteria , WP_015589468.1 MULTISPECIES:
thioredoxin family protein [unclassified Wolbachia]"
/translation="MVALNTPKVDVSFTAKDFNLLGVDNKYYTSLSDCCGKNGLIVMFI
CNHCPYVQSIISNLVSDVDQLKKDYQVNTIAIMPNDVNEYPEDSFENMINFAKENKFT
FPYLIDSTQKIAKEYGAVCTPDFFGFNSNLNLCYGRFNNAKKEKVQSYEVGSSDLFQ
AMKFIAETGNSPIDQKSSIGCSIKWSNSTG"
/product="thioredoxin family
protein"
/besthit="qcoverage 100 , hcoverage 100 , similarity 100
, identity 100 , eval 1.18e-136 , alnlength 190 ,
Bacteria , Proteobacteria , WP_015589468.1 MULTISPECIES:
thioredoxin family protein [unclassified Wolbachia]"
gene 16797..18515
/locus_tag="wEsol_00618"
CDS 16797..18515
/locus_tag="wEsol_00618"
/codon_start=1
/transl_table=11
/pfam="Na_H_Exchanger Asp-Al_Ex TrkA_N"
/fullproduct="qcoverage 100 , hcoverage 100 , similarity
100 , identity 100 , eval 0.0 , alnlength 572 ,
Bacteria , Proteobacteria , WP_141456699.1 MULTISPECIES:
monovalent cation:proton antiporter-2 (CPA2) family
protein [unclassified Wolbachia]"
/translation="MHSGSQHLFDIIILLSAVFIVIAFWKMNISPVLYFVAGAVIG
SHGFNLIHSAEAMDNLAEFGVVFLFFIIGLELTFERLIAMRIHVFGFGLQVIVTMVA
IWCIALAFGVNTNIATVIGGGLALSSTAIVLQVLQEKGSQASQVGRLSIAVLLMQDFA
VVPLIVLVPLLTGNSEHSLISLAGSLVQAAIALVLIFITGRLLLRPLFSVIAKMESN
EIFISTTLLIVLGAFFITEQFHLSLALGAFVAGLLVAETEYRHSVEHAVLPFKDLFLG
LFFMTVGMSSINTELLNKLPLITLLSIIILIVLKTSIIYILCRFFGFKSAPAIQAGLLL
SQGGEFAFILFRLADELNVLPSEIAQVLMVTTVTMAFTPLLSGLGDWIANFSFTEKT
ILDDEAVETDTQDLYNHVIVAGFGRVGYMVTKMLTAEHLSYVVVDIQSKIVKEGKSDS
FPIYLGDVTRCEILKSVGIERAQALVISIKNEVTIKKVSLVAANFPHVNIVIRLPDL
SNVEVYRDLGASKIIPETSEIGLQLGGAALSLSGISESGVMVSLKSRFRKGNYSMLKDL
GSDKDE"
/product="monovalent
cation:proton antiporter-2 (CPA2) family protein"
/besthit="qcoverage 100 , hcoverage 100 , similarity 100
, identity 100 , eval 0.0 , alnlength 572 , Bacteria ,

```

Proteobacteria , WP\_141456699.1 MULTISPECIES: monovalent cation:proton antiporter-2 (CPA2) family protein  
[unclassified Wolbachia]"

gene complement(18546..19055)  
/locus\_tag="wEsol\_00619"

CDS complement(18546..19055)  
/locus\_tag="wEsol\_00619"  
/codon\_start=1  
/transl\_table=11  
/fullproduct="qcoverage 100 , hcoverage 88.0208333333333 , similarity 100 , identity 100 , evalue 7.83e-121 , alnlength 169 , Bacteria , Proteobacteria , WP\_206759902.1 MULTISPECIES: SURF1 family protein [unclassified Wolbachia]"  
/cog="COG3346 COG3346 252 Uncharacterized conserved protein"  
/pfam="SURF1"  
/product="SURF1 family protein"  
/translation="MSLPVVHLLPNNDLEKFNRYRHKIDGILSDIELYVFAGQYGYHV LSPMLLTGTGNYMLVNKGIVKEKKEERAKIEKVAAGGVLYCNSKSKNWFIKNDTTSNT WFTLSTEEISNELGIKLEKCILWPNNFGSKVAIQPMKHLEYAITWFALSLIWLIMCVI YYRQNLNKA"  
/besthit="qcoverage 100 , hcoverage 88.0208333333333 , similarity 100 , identity 100 , evalue 7.83e-121 , alnlength 169 , Bacteria , Proteobacteria , WP\_206759902.1 MULTISPECIES: SURF1 family protein [unclassified Wolbachia]"

gene complement(19165..19641)  
/locus\_tag="wEsol\_00620"

CDS complement(19165..19641)  
/locus\_tag="wEsol\_00620"  
/codon\_start=1  
/transl\_table=11  
/fullproduct="qcoverage 100 , hcoverage 100 , similarity 100 , identity 99.4 , evalue 2.49e-102 , alnlength 158 , Bacteria , Proteobacteria , WP\_007549093.1 MULTISPECIES: bacterioferritin [Wolbachia]"  
/cog="Bfr COG2193 157 Bacterioferritin (cytochrome b1)"  
/pfam="Ferritin"  
/tigr="TIGR00754 bfr 157 bacterioferritin"  
/product="bacterioferritin"  
/translation="MNEEIVKHLNKLTLNELTSVRQYLLHFALKNNGINRLAEKVKN ELNEELEHANKLAERILLFKGVPNFQDTNEISKHDGEFTKDTIRKILEANLKLEGKGI KDIKETISIAEKEKDFVSVMLLEEMLKNEEEHFWHIEKQIDLIELMGVENYLRTQI"  
/besthit="qcoverage 100 , hcoverage 100 , similarity 100 , identity 99.4 , evalue 2.49e-102 , alnlength 158 , Bacteria , Proteobacteria , WP\_007549093.1 MULTISPECIES: bacterioferritin [Wolbachia]"

gene complement(19701..20057)  
/locus\_tag="wEsol\_00621"

CDS complement(19701..20057)  
/locus\_tag="wEsol\_00621"  
/codon\_start=1  
/transl\_table=11  
/product="hypothetical protein"  
/pfam="RDD MscS\_TM Pfam-B\_1921"  
/translation="MCVNCSYFTYFISSKAQATPGQQLNIYTINLDNSKIDLNLAFD RSTSQFFLPLNSVAVILTEFLQDQEVLVNVLSALKVMIVLLTLCWYLVACFSKKKQT YHDMLENTVVIKGTIK"

```

/cog="COG1714 COG1714 172 Predicted membrane
protein/domain"
/besthit="qcoverage 100 , hcoverage 73.2919254658385 ,
similarity 100 , identity 100 , evaluate 2.99e-75 ,
alnlength 118 , Bacteria , Proteobacteria ,
WP_015589465.1 MULTISPECIES: RDD family protein
[unclassified Wolbachia]"
gene complement(20186..20824)
/locus_tag="wEsol_00622"
CDS complement(20186..20824)
/locus_tag="wEsol_00622"
/codon_start=1
/transl_table=11
/fullproduct="qcoverage 100 , hcoverage 100 , similarity
100 , identity 100 , evaluate 7.26e-151 , alnlength 212 ,
Bacteria , Proteobacteria , WP_015589464.1 MULTISPECIES:
HAD-IA family hydrolase [unclassified Wolbachia]"
/cog="Gph COG0546 220 Predicted phosphatases"
/pfam="Pfam-B_6632 Hydrolase HAD_2 HAD Put_Phosphatase
PNK3P Hydrolase_like"
/tigr="TIGR01449 PGP_bact 213 phosphoglycolate
phosphatase, bacterial"
/product="HAD-IA family
hydrolase"
/translation="MKNSPLAVVFDWDNTLVDTQDNIFNAIKHTINSMGYSNKAADRN
SHESRKSVMVNLFGDQWKKANQIYQQYLDNALLQNIALNQGV EMLQTLKSHNVYLAI
VSNKKNTNLREEVTFKLDSEYFQVVGSCDTAEDKPSATPLLFALEESTLPINRENVF
FVGDSITDVLCAQANANCLPIIYGQSISGYEDLLCFQHFDFKLTDFVIKYLEDR"
/besthit="qcoverage 100 , hcoverage 100 , similarity 100
, identity 100 , evaluate 7.26e-151 , alnlength 212 ,
Bacteria , Proteobacteria , WP_015589464.1 MULTISPECIES:
HAD-IA family hydrolase [unclassified Wolbachia]"
gene 20976..21809
/locus_tag="wEsol_00623"
CDS 20976..21809
/locus_tag="wEsol_00623"
/codon_start=1
/transl_table=11
/pfam="Pfam-B_16420"
/fullproduct="qcoverage 100 , hcoverage 100 , similarity
100 , identity 100 , evaluate 1.77e-172 , alnlength 277 ,
Bacteria , Proteobacteria , WP_015589463.1 MULTISPECIES:
hypothetical protein [unclassified Wolbachia]"
/translation="MAQTSQESVEKKFKDVFERSPGAFPEGTSLEEKVNYIAKGTKAL
KAVKSKELNKMKNVAELNQKLESQEGRADEKARQDFERIAELDQQYKKGKIFGTFSEKV
AELKNDKKFQEAANTLRETTTEGKSVEQSGQKKTSEASVQTDTPSEHIVSPSVSKSS
VKEKLNTEPDKKDTPQPQENQKEEGFLSLLKRFVKKILEKLLGEDEKSVENHDMRE
DAQRDTSNNEEQQKSKQLDEILKDKSVSEGLKQATKLENPAITPVNTPKVNEVNTGRE
R"
/product="hypothetical protein"
/besthit="qcoverage 100 , hcoverage 100 , similarity 100
, identity 100 , evaluate 1.77e-172 , alnlength 277 ,
Bacteria , Proteobacteria , WP_015589463.1 MULTISPECIES:
hypothetical protein [unclassified Wolbachia]"
gene 22697..23197
/locus_tag="wEsol_00624"
CDS 22697..23197
/locus_tag="wEsol_00624"
/codon_start=1
/transl_table=11

```

```

/fullproduct="qcoverage 100 , hcoverage 100 , similarity
100 , identity 100 , evalue 1.73e-115 , alnlength 166 ,
Bacteria , Proteobacteria , WP_222933351.1 phospholipase
D family protein [Wolbachia endosymbiont of Drosophila
sechellia]"
/cog="Cls COG1502 438
Phosphatidylserine/phosphatidylglycerophosphate/
cardiolipin synthases and related enzymes"
/pfam="PLDc_2 Regulator_TrmB Pfam-B_9369 DUF1669"
/tigr="TIGR04265 bac_cardiolipin 483 cardiolipin
synthase"
/product="phospholipase D family protein"
/translation="MCFSLYYYAGFIFSPCPKATVCFSPGEDCAVPIINVIDQSKKSI
LVQEYTFTLGTVAKSLINAKERGVDVKVILDKSQLYSKYSVINELFSGGVPIWIDDKP
KIAHNKIMIVDNQKVITGSFNLSKTAKKGNAENLLIITDYPELIQQYVKNWEARMSQS
YKYAPN"
/besthit="qcoverage 100 , hcoverage 100 , similarity 100
, identity 100 , evalue 1.73e-115 , alnlength 166 ,
Bacteria , Proteobacteria , WP_222933351.1 phospholipase
D family protein [Wolbachia endosymbiont of Drosophila
sechellia]"
gene 23307..>23382
/locus_tag="wEsol_00625"
CDS 23307..>23382
/locus_tag="wEsol_00625"
/codon_start=1
/transl_table=11
/product="hypothetical protein"
/translation="MDYINDAAGSYTAIHDFQNGVGVD"
/besthit="qcoverage 100 , hcoverage 40.3225806451613 ,
similarity 100 , identity 100 , evalue 6.87e-09 ,
alnlength 25 , Bacteria , Proteobacteria , EAL58815.1
conserved hypothetical protein [Wolbachia endosymbiont of
Drosophila ananassae]"
gene complement(3629..3719)
/locus_tag="wEsol_tRNA-12"
tRNA complement(3629..3719)
/locus_tag="wEsol_tRNA-12"
/gene="tRNA-Ser"
/intronpos="0..0"
/program="tRNAscan-SE"
/cove_score="73.8"
/evidence=predicted
/type="Ser"
/anticodon=GCT
/product="tRNA-Ser (GCT)"

```

#### ORIGIN

```

1  tgactatcca gaactaagaa aagctatttc agatataata gaaagtattg cacaatcctc
61  acaagagggg aaaaaagagt tatttacaac cctatcagaa caagttaaag ggatgaacct
121  caaagattta ggttttagcaa ttaatgacca aggcttgcaa aaggaggtaa ataaagaatt
181  atttataaaa ctcatgaag aagcacttaa agatttaact tctgaaaatg ttaactcaaa
241  aataatagaa gaggcgttaa aatctgttaa tcagcaagca ataagtaatg ttataaataa
301  taataaaggt ccactggaca atctagtcaa ttatttttaa tcagcctctg caaatgaaaa
361  aataggaata gcttctgctg gaatggtatt aggagtagca ttttctccgc ttattgtgct
421  tgctacatta atagcgcttg tagctattgg agcacgttat gtaggaatag gtataggaaa
481  ggcaggggaa aaaataaaaag aaggtgcat tgatgcagga aaagcagtga aaagtttatc
541  taaaaattta ggggataaat tgcctgaggt tgggccaaaa aaagataact ttagtaaatt
601  atacaacagt ttggctcaag agattacagg ctataatatg tccgaagaag gtgaaaaaat
661  aaaaaacgcc cagagtaaag caaaggtcat aggcattgctt caaatgaag ggcagcgatc
721  tgctatacaa gagttagtaa agaatggaac tattcaaaat ttttcagaag atgacatgaa

```

|      |             |             |             |             |              |             |
|------|-------------|-------------|-------------|-------------|--------------|-------------|
| 781  | aaagcttaga  | gaaaaaggta  | ctagtactta  | tgaaagtgat  | aaggaagcac   | ttgaggaact  |
| 841  | tatggagaaa  | tttcaatcta  | aaattatggc  | cattggtgag  | ggtaaaatag   | aggaggtaga  |
| 901  | aaaaattggt  | gatgagaaag  | ttgcagcaat  | gaagccatct  | tctcacttag   | gtattttcaag |
| 961  | tgctgcacga  | gttagtgaag  | gaggaatcac  | aggaccaagt  | tgatgcattt   | ttttacgcaa  |
| 1021 | aaattactat  | cagaaagtgg  | ggttacgcta  | ctccttttta  | tccacttttt   | tgagcaatcc  |
| 1081 | acttccacat  | ctaacacaca  | tctcagtgat  | tataatatcc  | aatttttgat   | catgtttttc  |
| 1141 | tacaggtaaa  | tctttacaat  | attgtttctc  | ataggctaca  | cctataaata   | tttttccaag  |
| 1201 | tggccgcagt  | ttttctatca  | ttgtatcata  | ccaaccaccg  | ccaaaaccca   | atctattaaa  |
| 1261 | atgatcatca  | aaagcaataa  | caggagtaat  | gattgtgtcg  | ggaattacat   | cttcatttgt  |
| 1321 | tttgttccat  | tcctcaaatt  | ttagtaactt  | atttttatta  | ggaattgcta   | ctttataatc  |
| 1381 | taaatcgagt  | aaactatgca  | tcaaagggtac | aacattttatt | tccccgtcca   | ttggaatgta  |
| 1441 | agctgctatt  | gttttgctt   | taacgtagct  | taagtctga   | ttaaagagat   | taataaggga  |
| 1501 | atttgctgca  | taactggaat  | aactttcatc  | aatatctttt  | cttatagctc   | tataattgctc |
| 1561 | tcttattttc  | tttttgctg   | gtttaatatc  | tttgaacatg  | atctatccat   | tttgagtaa   |
| 1621 | gtttttcttg  | taaactattt  | tgcttcaagc  | gctcacttaa  | aaagtcaaag   | tcaataaact  |
| 1681 | ccatatcctg  | gtcttgatta  | ctgcagctat  | aaacaaaact  | tctttctcct   | gtttccttat  |
| 1741 | ttatatgttg  | ctgaacacat  | tgagcacaga  | tttctttcat  | catacactgc   | ataggagaat  |
| 1801 | taactgacga  | tattgctata  | tgacttgact  | tcagatatgg  | ctttaaaatt   | gtttttctag  |
| 1861 | cttcattcac  | agctttcatc  | attttatcag  | aaccaatagt  | gataatttta   | tctataacgt  |
| 1921 | tcaaattaat  | acctaattctt | ccttggtgat  | aagagactat  | tgcatcaact   | atattaccat  |
| 1981 | gaaaggattt  | atcttgatct  | ctgcttggtt  | ctatcaatcc  | ttcttcacat   | gcccaaacta  |
| 2041 | ctgcatttga  | tgcacgctct  | atcagtgtct  | gtttaaatac  | atcacttaac   | ttcttatagc  |
| 2101 | cagcgaagta  | caaaaccttg  | ttattatttt  | caagacatgc  | cttccctatc   | gaaaataaca  |
| 2161 | ctgcatttcc  | aactccacca  | ccaattagca  | ttatatctt   | catgtgctat   | tttaactaca  |
| 2221 | tttgttcaaa  | ttttttgaaa  | ttttatagaa  | caaagtaatt  | tatatagtcc   | tatacacaaa  |
| 2281 | gacagagaca  | aggacactct  | ctgacttcaa  | ctataccgat  | aactgatagc   | tgcattttta  |
| 2341 | cgcatatcat  | ctaataacaa  | gttgctttgt  | atcataatct  | tttggttgga   | cattttctgt  |
| 2401 | ttgattgctt  | ctatacccg   | tacattactc  | ttgatatac   | acaacatcat   | caactttgca  |
| 2461 | gtgccatttt  | ctctcaattc  | tactattttc  | ttcacacttg  | ttttactaaa   | taaaatctgt  |
| 2521 | aaatcaggat  | ttaaatctcg  | cattttttatt | tcaaattctt  | ttgcgttttg   | cagcttaaaa  |
| 2581 | ttatctgcta  | atttatcaaa  | atttaaacaa  | ttactttttt  | gctccttgag   | attatcta    |
| 2641 | aaacttttctg | aaccttcaac  | cacaatctgt  | tttaatttta  | aagtgttttc   | cagcagtgca  |
| 2701 | tgattaagtt  | gtacttttatc | tattactttt  | ataacagagt  | aaccttcact   | aaaactgaat  |
| 2761 | ggacctgcta  | tgctgctggt  | ttctaatacct | tctaaaacgt  | tcttgagttt   | tccttttagc  |
| 2821 | tgactttaat  | taactgttgc  | tttacgcatac | tttattggag  | attctgggtt   | attactgttg  |
| 2881 | cgtaattttt  | ttactaaatc  | ttcagctata  | ccataaacgt  | ccttgctttt   | ttgatcagga  |
| 2941 | attataaact  | cttggaacgt  | gataagataa  | tccggctttt  | ctgtttgcct   | ttttacatca  |
| 3001 | ttactttctt  | tatcgcttat  | attaataaat  | ggcacaattc  | ttacttcaat   | aattttgctc  |
| 3061 | cacagtaact  | gacattttat  | ttgttttctt  | aaaataccaa  | gatctatatt   | atgcttctct  |
| 3121 | atgtattgat  | caacttcatt  | agccttaagt  | ttaaaacttt  | gggttaaaaa   | taacatgata  |
| 3181 | gcattatcta  | actcctcggt  | gctcaatttt  | atattcagcc  | tctgcgcttc   | attgataatg  |
| 3241 | ataatttcgt  | ctattagctc  | cctaagaatt  | tgaggctttg  | ctcctttttg   | atcaacactt  |
| 3301 | tgagtgccaa  | acaatgaatt  | tataaagttg  | atgcgttttt  | cgatatctaa   | atttgaaatt  |
| 3361 | ggctcaccat  | ttacatctgc  | aacaattttc  | atctcgattg  | caagcaacct   | aagtggcaac  |
| 3421 | actattaaca  | gtaaaattag  | tatttttatgc | atataagtaa  | ggttaataac   | caattctata  |
| 3481 | ataaatactg  | agtcaatgct  | agccaacttt  | ttaatagtga  | tctcagtgac   | aatggaaata  |
| 3541 | aaaaccattg  | caacaaaatc  | aggtacgctg  | gtaaataggc  | taaaaacatg   | ctaataatagc |
| 3601 | gaatttagac  | cgtgctcaaa  | acagtatacg  | gaaggagagg  | gattcgaacc   | ctcgatacga  |
| 3661 | cttttggtgc  | gtataacggt  | ttagcaaac   | gccgccttca  | gccgctcggc   | cacccttcca  |
| 3721 | aatttagaac  | ctaaagatta  | tataatacca  | agacctctac  | cacctgtcta   | atgcttttaa  |
| 3781 | ttgcaatatt  | tgtatctgtt  | cagatgcatg  | gctaattgctg | aaacaaaaat   | tccagtgtct  |
| 3841 | cctttcttgt  | catcccagtg  | cgtgacactg  | ggatccagga  | ttttgattag   | cactaagttg  |
| 3901 | gtgagcatat  | aagtgttatg  | ttaaaatata  | acgttttttac | ggaaagtctg   | gatcccagtg  |
| 3961 | tcacgcactg  | ggatgacatc  | gtttactatg  | tgccatattg  | caatgttcgt   | acggttgtgc  |
| 4021 | gcggtataga  | ttccgctaac  | gagtagcgga  | atgacgaatt  | tgttattttt   | caaatcgtag  |
| 4081 | agccacttta  | gctataaaatc | aacaaaaact  | aatttccgct  | tttaatatagag | cttgcaacaa  |
| 4141 | tttgttttgc  | ttcttctaca  | ccaaccatt   | ctccaactgc  | taccgttttt   | cccttttcta  |
| 4201 | gatctttata  | atgagaaaag  | aatgagtaa   | ttttatctag  | taggctttta   | gataagtcag  |
| 4261 | aatagtcctt  | tataattgtca | taatagctat  | caacactgga  | aacaggcaca   | gctaataattt |
| 4321 | tctcatcttc  | tcctttttca  | tcttttagtga | gtaatgcgcc  | tattggacgc   | accgatatta  |

|      |             |             |             |             |             |            |
|------|-------------|-------------|-------------|-------------|-------------|------------|
| 4381 | aaacactaga  | tgctaaggga  | aattgagtta  | gcacaaaaac  | atccacagga  | tcaccatcac |
| 4441 | ctgcgaggt   | atgttggtata | aacccataat  | tgcaaggata  | agtcattgag  | gtagacaaaa |
| 4501 | atctgtcaac  | ttgtaacaac  | ccaaactctt  | tattaaattc  | atactttaca  | ggctcagcat |
| 4561 | tcgcacttat  | ttcaattacc  | acattcaccg  | catttggtcc  | cgctgttatt  | ttacttaa   |
| 4621 | ccataaatta  | cctcttaact  | taagattata  | caatatgtac  | ttttaagttg  | ctacatttat |
| 4681 | gtagttctaa  | gcttggtttg  | catggagcgg  | tcctaaattt  | tcattcatca  | tcttattgac |
| 4741 | tggtgaaagt  | ggtggttcct  | gtgggtggtt  | caataattga  | aataaggcat  | atactattac |
| 4801 | aatagtaagc  | accgcaccaa  | ttatcagggt  | agtaagggtg  | tcttggtggca | aaacattttt |
| 4861 | tattgagttg  | agcaattttt  | gctccataag  | gaaataatca  | gcaacagata  | acccaacaga |
| 4921 | caatataaac  | atacctaaaa  | taagtttaca  | gactgtgttt  | ttatagtctt  | tttctttttt |
| 4981 | cttgctgggtg | ataagatttg  | gcctatatct  | attctcttct  | ggcaacactg  | agtagtatat |
| 5041 | attctcaggg  | ctcattacta  | attggttcaaa | ttcatcacta  | ttttgggttt  | ttaacagttg |
| 5101 | ctctaggggtg | ttttttgtat  | ttataggaca  | tgtaaatcca  | tccattttca  | atgctttctc |
| 5161 | ttgccgatcc  | acattctcat  | ggtcgattgt  | atatttatct  | ctacttgata  | atccgatcat |
| 5221 | gtgtagtttg  | ctagctaagt  | gcactatata  | gttctctatt  | aactgattct  | cacatatctc |
| 5281 | tagtacttct  | cctcttactg  | ttttgttaga  | tggtgaaagt  | tctttatagt  | aactacctat |
| 5341 | ggaaaacaac  | aatgcaatat  | ctttatctac  | ttttatatta  | tgaatagagt  | agtaacagcc |
| 5401 | aataacgcac  | ttattttaatg | caaattctct  | gtcataattg  | tttaatgtat  | ttccttcact |
| 5461 | tagtaacttt  | ctaagaccaa  | tgagtacttt  | attttcaaaa  | tcttcttctg  | ttttaaatat |
| 5521 | tggttctctc  | tttggaattg  | ctaagatggt  | aagtaaatct  | aattttcttc  | catctactac |
| 5581 | ttcattttata | tattcattta  | actcagatcc  | tttaataact  | tcataatatt  | tatctatgac |
| 5641 | atcttttagta | ttcagggttat | tgttttcact  | tagaatttga  | taagcttgag  | cataaattaa |
| 5701 | aaacagccct  | tgtagactaa  | attttaagtt  | aaaatattta  | tctaattggt  | cctctttttt |
| 5761 | tctaataaat  | tcagacaaac  | caaaatgatt  | tctgtgatcc  | ataaaacgac  | ctaagtcagc |
| 5821 | atggtgaaag  | ctacctaata  | aaataaataa  | cgtctcta    | aaattaccct  | taccaacaat |
| 5881 | ttttattagt  | tcttcaattt  | cttttatcat  | tgctgaaacc  | tataatgttc  | tactttatag |
| 5941 | tataagggat  | acatggcaaa  | atagcaataa  | atggtattag  | acttcttgca  | taacctaaac |
| 6001 | taagtagaaa  | aaggatatagc | tataccgccc  | cggcactaac  | aagagatccc  | gctaacacgc |
| 6061 | agcgggatga  | cgagacttat  | ctttatgccg  | ccgcgaaccg  | tcataccgcg  | attcattcgc |
| 6121 | ggtatctctc  | aacatagatc  | ccgctaacac  | gtagcgggat  | gacgaattac  | ttaaccatca |
| 6181 | ttacaccgct  | ataccgcgat  | tcattcgcgg  | tatctcagct  | agtcccgcga  | acaagcagcg |
| 6241 | ggatgacggt  | tgtcggttag  | ctacaaacat  | taagaaaatt  | accaaataga  | aaaaaaggca |
| 6301 | aaagaagccc  | cgtgggttggc | taattactta  | cattatactt  | tcaagtatgg  | cgttttttta |
| 6361 | ttctaaacac  | ttataaaccg  | cgatttagct  | gcttttaagc  | cgcaactaat  | ctaaattata |
| 6421 | aacgttaaga  | aattttactaa | acagaaaaaa  | aggcaaaaaga | aaccctaggg  | tagctagtta |
| 6481 | ttcactatcc  | atttttttaag | ttggcggttt  | ttaatgtttt  | aaatgcttta  | taagcgtatt |
| 6541 | tcagcttggtg | taggtaaaaa  | cccagaaatt  | tgataaaagac | atagagtgca  | catagtgcaa |
| 6601 | aaaattaaac  | atgagacgcc  | agatacgtga  | gtttttttgt  | catttaatct  | gtacagagaa |
| 6661 | gataaataaa  | tagcttcagt  | ttcatgataa  | gggggctggc  | ggagtttgct  | aagcaagttt |
| 6721 | ttttgtttct  | attcccaatg  | ttatatgggt  | atgcaagaag  | tctattgtat  | gtttacactc |
| 6781 | tgcatataag  | cttttagtta  | agagcatatc  | catccaccgc  | cgataacttg  | ctcatcttta |
| 6841 | tacgctacac  | aggcttgacc  | tggactgatg  | ccaaagtaat  | cgtcgtttta  | aatgacacag |
| 6901 | gctttatttt  | tttcgctcagt | tgaatgtatt  | gttgctaaac  | ttcccgcagt  | tgatgatctc |
| 6961 | agcttcacag  | ttacttccat  | accttccttt  | ggttggttcta | accaatttta  | ctccttgatc |
| 7021 | aatatttttt  | tttgcattaa  | tacgttgatc  | ggacctacta  | taacctcatt  | attttctgta |
| 7081 | ttaattttta  | tcacataaaag | aggttcattg  | tgtgcgatac  | ccaagccctt  | tctttgcccc |
| 7141 | actgtaaaat  | ttactatgcc  | actgtgctcg  | cctagcactt  | ttccattaac  | atccactatt |
| 7201 | ttacctttct  | gtacagattg  | tggagcta    | ttagctattg  | ttttactata  | gctttcggaa |
| 7261 | acaaagcata  | tatcttgact  | gtccggcttt  | tcagaaaatt  | gtaagccaaa  | atactttgct |
| 7321 | aattttctta  | tatcactttt  | atagaaccca  | cctagtggaa  | atcgcaaaaag | cttcaattgc |
| 7381 | tcttgagttg  | tagcaaaaca  | aaaataactt  | tgatctttac  | ttttatcaat  | gcttctacac |
| 7441 | aactttacct  | caccattttt  | ttctaaccct  | ctcacgtaat  | gtcctgttac  | gagcacatcc |
| 7501 | gcaccaagat  | tttttgtaac  | ttgcaataga  | tcacgaaatt  | ttaccgtttg  | gttacatctc |
| 7561 | acgcatggta  | tgggagtttc  | cccacgcata  | taggtactcg  | caaaatcctc  | tattacttcc |
| 7621 | tttttgtaata | tttcctcata  | gtttaaaaata | tagtgaggaa  | agccaacact  | ttcagccaca |
| 7681 | cgcttagcgt  | cataaatatc  | ttgtccagcg  | cagcatgcgc  | cctttcttgc  | accatcggtg |
| 7741 | ccatagagtt  | gaagagttac  | acctatcacc  | tggtagccaa  | agttatatag  | cagtgtgca  |
| 7801 | gcaacggagc  | tatcaactcc  | cccggacatt  | gcaacaacag  | ccttggtctg  | gtgaggagct |
| 7861 | ttatctttta  | gcagaggttc  | aattttcaaat | tcttttagca  | taatcgccct  | aatttataaa |
| 7921 | cacaaacttg  | gtgtcatgca  | agtagctgac  | actggaatct  | agtttctatt  | acacaatttc |

|       |             |             |             |             |             |             |
|-------|-------------|-------------|-------------|-------------|-------------|-------------|
| 7981  | atcgaacacag | catacttggt  | tatagtcaat  | ttttctggat  | cccagtgttg  | gctacttggg  |
| 8041  | tgacatcttt  | atgcttgagg  | taaaatttgc  | tataaaattc  | gatgaactac  | ctttaaaaat  |
| 8101  | aatttaaatcc | tgcttaaata  | aaacatggcc  | aaaataatcc  | atgttttcaa  | gcacttttcc  |
| 8161  | gctacccaga  | gcaacacaa   | aaagtgggtc  | atctgcaaca  | cgaactggta  | gttttgttgt  |
| 8221  | ttcactgata  | actttgccca  | agttacgcaa  | taatccgccg  | ccaccggata  | aaattattcc  |
| 8281  | tttatcgact  | atatcagaag  | aaagttcagg  | tggagtgtct  | tccagtgcag  | tcctaatagc  |
| 8341  | agaaattatc  | tgatgtacag  | gctctattaa  | actctctgca  | acttggtatt  | ctgataaaag  |
| 8401  | catttctttt  | ggcatgccac  | tcactaaatc  | cctgccttta  | attatcattc  | cctctttgtt  |
| 8461  | attttcacct  | ggcaaattgg  | ctgaacctat  | gcttttctta  | attttctcag  | cggttggttc  |
| 8521  | accgattaat  | aatttatgat  | tttcacgaat  | atatgatttt  | attgcttcac  | ccataaatat  |
| 8581  | gccacctact  | ctggcagaac  | gtgaataaac  | aattccacct  | aaagaaataa  | ttgcaacttc  |
| 8641  | agttgtaccg  | cctcctatat  | caacgatcat  | agaaccctca  | ggttcagtaa  | ccgggagccc  |
| 8701  | agctccgatt  | gctgcagcca  | ttgggttcttc | aattaaaaat  | acttcatttg  | caccagcact  |
| 8761  | ttctgctgca  | tcttgatatag | cacgcctttc  | aactggcgtg  | gatccagatg  | gaacgcatat  |
| 8821  | gataaatatta | ggtttattaa  | cagtgaattt  | tgtgtttgca  | ctgcgtatga  | aataattttag |
| 8881  | catttcttcc  | gcacttttaa  | aatcagcaat  | gactccatct  | tttaagggcc  | ttatcgcttc  |
| 8941  | tatttctcca  | ggcgtttttc  | caagcatcat  | tttagctttt  | ttacccaaaag | cataaggaac  |
| 9001  | gtagcttccct | ttttctttta  | ttcttgctac  | aactgaaggc  | tcatcaagca  | ctattccctg  |
| 9061  | atttttctga  | taaactaaag  | tgtttgtagt  | gccaaagtct  | atagcaatat  | cgctagcaaa  |
| 9121  | taaacctttg  | aaagtgaaaa  | gactacaaaa  | cttttcgggt  | aattttcgaa  | caaaattcat  |
| 9181  | acgcaactca  | agaaaatcat  | ttattaagac  | aaattatact  | ttccagataa  | gtagctaata  |
| 9241  | cagcactcaa  | cgtctaaacc  | cttacctggt  | acttttttta  | gcagttccag  | gccacacttt  |
| 9301  | gcactgtata  | tattttgaga  | taaccaactg  | ataagtaaac  | taaaatctcc  | ttttattata  |
| 9361  | gcacttaaat  | attcgtaaat  | attcttttta  | acgcaagaga  | aaatctgcac  | agcagcaatt  |
| 9421  | aaagcaataa  | tttttatagg  | aaagtagccc  | ataacaccgc  | ttgcccaata  | ttcatcttga  |
| 9481  | aaataagtgt  | ttagctcatt  | ttcagctttt  | actggaattt  | tatagtgtct  | cataccttcc  |
| 9541  | agccacgcat  | catgcaggtc  | tttgacttcc  | aatgtaccat  | ttattatata  | ttgttctaac  |
| 9601  | ctagttctca  | acataaatat  | agctaacaga  | ctaaattcat  | ctgcattttt  | taaaaaagaa  |
| 9661  | gaaaggttta  | tttcattgaa  | aatcaagtac  | aaattttcaa  | cactgctaac  | tttctcgtta  |
| 9721  | gttttgccct  | ttatagcaaa  | tttctctttt  | atgtgtgggt  | gaatgaactc  | aataaattct  |
| 9781  | ctggatgttc  | caatcatcct  | ttccatgaat  | aacccttgag  | tttcatacat  | aacatgtctc  |
| 9841  | gtaattgggc  | tacttataga  | attttgcgct  | aaacattttt  | gataaattgc  | ataaccacta  |
| 9901  | tgccgtaaaa  | gagaaaataa  | accataacaa  | aagtcagatt  | catcataatc  | tatagggtag  |
| 9961  | taataagaag  | tacgaacctc  | atgcagtgcg  | acacccattt  | gctgtaaaca  | tgacgagcca  |
| 10021 | agttcaatct  | gcttctgagt  | agcaactttt  | tgtatatatt  | taaccttatc  | ctttttctgc  |
| 10081 | ttttcaatta  | ttttatctac  | atttccacta  | aagaatttgc  | ctaccttggg  | gaataacttc  |
| 10141 | cttatattct  | tttctgtgat  | atcagagtca  | tagtcagcaa  | gcagtgagtc  | gtattttgag  |
| 10201 | catttttaatt | gctgcgattt  | tatagaagct  | acttcgcgaa  | tgagtgtgat  | taaatcagta  |
| 10261 | aaacgttctt  | ttagtttttc  | caagttactg  | gcttcagaat  | tgtttagcct  | ccataaaactt |
| 10321 | tggcattcaa  | cttttagcttt | ggacaaagat  | tttactaaat  | caataggaac  | agcactgttg  |
| 10381 | ctcttatgta  | ttctctctat  | taacttttag  | tgccaagcat  | ctgcactctt  | tttgttgtca  |
| 10441 | agagcatctg  | ctaattgattc | ctttattacg  | tcatgagaga  | taatttcatg  | tctgatttct  |
| 10501 | tctagaagac  | tcatttggtc  | aactttgtcc  | tctgcattca  | attggctttg  | gttttagtact |
| 10561 | tttagcgtat  | tttcgatatt  | ctttacccta  | tataataact  | cctctaaaaa  | cttataagat  |
| 10621 | ttcatatttg  | ttcattattt  | tagaaaacat  | ctgtttaaca  | tcgtgataga  | ttaataataa  |
| 10681 | agttaaaagt  | atatttgctt  | aaagtacaat  | aaaaaattgt  | actttttatt  | cttttattgg  |
| 10741 | atttttctac  | tcagagtcca  | gcatattata  | ggaaaattaa  | ttgtaagggt  | gtagaaaaag  |
| 10801 | tatttagtat  | tttatttctc  | ttgactatat  | tacaatatgg  | agagatatta  | gctactgaaa  |
| 10861 | ttaaagttac  | gcactattta  | aaatttatgg  | aggttttagta | atgtggagta  | gactggttat  |
| 10921 | aatgtgctgt  | ttttgtttat  | tacttactgg  | tgtaagttct  | tgcccaaaaa  | aaggagcaaa  |
| 10981 | tacaacaaat  | aaaataaaat  | ctgttggtta  | gcagataggt  | gataaaagag  | ttttctttgg  |
| 11041 | ttatgatgaa  | tctagtattg  | ctgaagtaag  | tgcagatgca  | ttacttgacg  | taatggaggt  |
| 11101 | gttacaagat  | aaccctgacg  | cgaaggttac  | tttaactggg  | cacactgaca  | accgtgggtc  |
| 11161 | tcatgaatat  | aatcttgctg  | taggcgctag  | aagggcagat  | gcagctaaaa  | aatttatggg  |
| 11221 | tagttgtaca  | ccctacatag  | aaaacagaat  | aaaaactgct  | tctaaaagggt | aaactgagcc  |
| 11281 | tttgggtta   | gtaaaagatg  | attctagaaa  | ttctaaaatat | gaaaaagagc  | atgctaaaaa  |
| 11341 | tcgtagagt   | gaattttcat  | tttctggaat  | aaagaaaatg  | tttcttgcat  | taaaacctgg  |
| 11401 | atcccagtgt  | caagcactgg  | gatgacataa  | agaaagggca  | ctggggtaga  | caaaaaagga  |
| 11461 | caaacttgct  | atatttctgt  | gcttgtttag  | gggatctata  | tataaccacaa | ataagtcgct  |
| 11521 | gtatgacgta  | gagactatct  | ggccatcaag  | aggcataatg  | gaattagagt  | tattattttca |

|       |             |             |             |             |             |            |
|-------|-------------|-------------|-------------|-------------|-------------|------------|
| 11581 | aaatgtgggtt | aatagtttttg | ctttctataa  | taatcaagtt  | gcagttgcag  | tatcaggtgg |
| 11641 | tgtagatagt  | ataatctttac | tgcacttaat  | gaataactgg  | gcaaaaaaaaa | acaagcttcc |
| 11701 | acttcctata  | gcattaacag  | taaatcatgg  | gttacgttca  | gagtctcaaa  | aagaagctga |
| 11761 | ttttgttgta  | agttatgcaa  | aggaacttgg  | agcaaaggaa  | tcgttcatat  | taaattggga |
| 11821 | gaagcaaaat  | attaaaggca  | atattcagtt  | acaggcacga  | aaagcacggt  | ataagttact |
| 11881 | agcagagtgg  | tgtaaaaata  | ataatgttaa  | atatttactt  | gttgctcatc  | acaaagatga |
| 11941 | tcaagcagaa  | acgttcttgt  | taagattaga  | gcgaggtagt  | ggcgtagatg  | gattatcatc |
| 12001 | aatggactac  | aagtctttcc  | taaatgggtat | ttatatattt  | aggccattgt  | taaattttag |
| 12061 | tcgtagtgaa  | atagaaaagt  | acgctaagct  | tcatcggtta  | aaatggatcg  | aagatagaag |
| 12121 | caactatgac  | ttaaaataca  | ggcgaacttt  | ataccgtaac  | ttacttaaa   | caagtataa  |
| 12181 | tcaagagatt  | ttaacagagc  | gaatatgcct  | cacagccctt  | catatgaaaa  | gagctgcaaa |
| 12241 | agcgttgatg  | cactacacac  | gccttgcggt  | taatgactgc  | gttaatgtgc  | atgatcttgg |
| 12301 | ttatattgaa  | attaaactaa  | gtgagtttta  | tcaattgcca  | gaggaaatag  | ccttgaggct |
| 12361 | tcttctttac  | tccataatgg  | caattgccag  | taaacattat  | aaaccaaggt  | acaacagtct |
| 12421 | tatcgtaata  | tttaataaaa  | tattgcaaaa  | ggatagtaat  | gttaattgta  | cactttctgg |
| 12481 | gtgtaaaata  | agaaaacatg  | gagaaaatat  | cttgataatt  | agagaatcgt  | caaagataca |
| 12541 | agaaattacc  | ttaaaccctac | ctttaaatga  | acctactcaa  | tgggataaca  | gatttagctg |
| 12601 | cacaatactc  | ggaaatcaag  | agtgttcagt  | tatcatcgct  | ccattaaaaa  | aaacacaaaa |
| 12661 | agttcctgaa  | tttctgaagg  | attacaactg  | ctgccctgaa  | gttttctatt  | ctttgcctgt |
| 12721 | agtgcataaa  | gatggaaagg  | tgcttgctta  | tctgatgta   | aattataacg  | gaaaaaatac |
| 12781 | caatgacgat  | aagggttcaat | gcattattaa  | tagcacgata  | aaacaaaatt  | tggtaagctt |
| 12841 | gattagtatt  | tagttagaaa  | tagaaatgaa  | aaaattttta  | gaaggcttat  | tgatctgggt |
| 12901 | agtaattatt  | gttcttattt  | cagttgctta  | tattcagttc  | agcggaaatg  | taggtaaaag |
| 12961 | taaaacaatt  | ataccttttt  | cgggaatttt  | aactagacta  | gaagacaatg  | atgtagaaaa |
| 13021 | tattgtcata  | aaaaaccaga  | gcattgaagg  | caagttcagg  | gacggttcaa  | gtttcaattc |
| 13081 | aagcgggtgc  | atatatagcg  | acctaataaa  | aaatttacat  | gatagaaaag  | tgagattctc |
| 13141 | cttttcaact  | ggagattctg  | ccatgaacgt  | aattggtgga  | ttacttatct  | catgggtccc |
| 13201 | aacattttatc | tttattggct  | tcttgctatt  | ctttcttaaa  | caaacacaag  | cggggggcaa |
| 13261 | cagaactata  | agcttttgca  | agtcaagggc  | tagactcatg  | actagtggaa  | aaaaagtaac |
| 13321 | atgtgatgat  | gttgccggaa  | ttgatgaagc  | aaaagaagag  | ctagtagaga  | tcgttgattt |
| 13381 | tcttaaacaa  | aggcaaaaat  | ttcaaatatt  | aggtggaaaa  | ataccaaaag  | ggtgcctttt |
| 13441 | gattggctct  | cctggaactg  | gtaaaaacttt | acttgctcgt  | gcaattgcag  | gagaagctaa |
| 13501 | tgtgccattc  | tttagtattt  | ctggatctga  | ttttgttgaa  | atgtttgtgg  | gtgttggtgc |
| 13561 | aagtcgtggt  | cgtgatattg  | ttgatcaagg  | caagaaaaat  | gctccttgta  | taatttttat |
| 13621 | agatgaaata  | gatgcggtgg  | gtagacatcg  | tggcattggt  | cttgggtggcg | gcaatgatga |
| 13681 | aagagaacaa  | acattaaatc  | agttattagt  | tgagatggat  | ggctttgagt  | ctaatgaagg |
| 13741 | tgtaataata  | attgctgcga  | ctaaccgtcc  | ggatgtctta  | gatccagcac  | tgcttagacc |
| 13801 | tggctgtttt  | gaccgacaga  | ttactatttc  | tttaccgat   | ataaatgggc  | gtgaaaagat |
| 13861 | attaaatact  | catataaaga  | aaatatcaat  | agcaccagat  | gtaaacgtga  | aaacagttgc |
| 13921 | aagaggaaca  | ccagggttttt | caggggctga  | tctagcaaat  | ttggtgaatg  | aatctgcact |
| 13981 | tatcgctgca  | agaagaaaca  | agaagattgt  | taccatggat  | gatttcgaat  | atgcacgtga |
| 14041 | taaagtgatg  | atgggcgtag  | aaaggcgatc  | tctcattatg  | acagaagagg  | aaaagagact |
| 14101 | gactgcatac  | catgaagctg  | gtcatgcgat  | gattgctggt  | aatatgcctg  | cttctgatcc |
| 14161 | tatacacaag  | gcaacaatta  | ttccacgcgg  | tagggcactc  | ggttttagtta | tgagactacc |
| 14221 | agaaacagat  | agagtgtccc  | tcacaagaga  | aaagatgcta  | gcagatataa  | ctggtgcaat |
| 14281 | gggtggaaga  | gtggcagaag  | agctaatttt  | tggctacgat  | aaagtcacaa  | gcggtgcac  |
| 14341 | ttcggatata  | aaacaagcat  | ctgattttatc | acgcgctatg  | gtaacaaaat  | ggggaatgag |
| 14401 | tgacaaaata  | ggcccgatct  | atcacaatcg  | cgaacaaacc  | atacatgggt  | ctgagataat |
| 14461 | ttctgaagat  | acgttaaaaac | ttatagatga  | agaagtgaag  | aaagttgtat  | cttcttgcta |
| 14521 | tgaaaaagca  | aaagacattt  | tgaccaagca  | taagaaaaggc | ttagatctca  | ttgccgaaaa |
| 14581 | tctactggag  | tttgaaaactt | taacaggaga  | tgaaaataaag | gacatattaa  | atggaaaaaa |
| 14641 | aattgttaga  | gaggaaaatg  | agaagaatga  | gaaaataaaa  | aaatcctctc  | tctatgagag |
| 14701 | ttgacctcat  | cttaaaaatg  | ctaatacagct | aacgctgcaa  | taaaacattc  | agaattgtaa |
| 14761 | ctgtcaatat  | aaattgtatt  | aaaatattca  | taatatgtca  | ttttcatcac  | aataatgcta |
| 14821 | tcattcagtt  | agtattaatg  | tttaatgagg  | tgtgagtaat  | gattgatata  | gcttctattg |
| 14881 | gtgtaagtac  | agttattgat  | cagaattata  | gaagaaaagc  | acaattatgt  | ttatcaggat |
| 14941 | tatttgtaac  | tgtgtcaata  | gcaactgtta  | cctgggtttat | tttccctgcg  | tcacaaaatg |
| 15001 | tattagctcc  | gttttttactt | cgggctatgt  | tcttgctctt  | cacttttatcg | atgggttatt |
| 15061 | acatgttcat  | atttagttgt  | gaagaaaaat  | ctttggtaaa  | gaatgttctt  | ggtaggttg  |
| 15121 | aaccggctga  | atcggtaaaag | agagtgcatt  | gccaaagaaa  | tattaagtcc  | ttattagcag |

|       |             |             |             |             |             |             |
|-------|-------------|-------------|-------------|-------------|-------------|-------------|
| 15181 | aagtgagaag  | tactacgaaa  | gataggtttc  | gtaacgtgct  | tgттаатстт  | tgttttgaag  |
| 15241 | atcgtagtaa  | agcacacaaa  | cttgсattat  | atgtgaaaga  | aattgacaat  | attgtgtcctt |
| 15301 | caataaaaaa  | taaagacctc  | ttagaccatt  | ttgatcaatt  | ttttactatt  | actgaagtaa  |
| 15361 | gcaataaaaa  | aaatagaagt  | gaattaatga  | acctcgcaag  | ggcatataag  | atgataagtg  |
| 15421 | aagaagatcc  | agacaaaata  | caggattttt  | tagctactca  | aacaaaaagt  | tattcatatg  |
| 15481 | aaataatggt  | acctgaaatt  | gataattttc  | tatcacaagc  | taggtgattt  | tatcaataat  |
| 15541 | ttcattgtgt  | acgtgattat  | cattttttgt  | ttcaattcca  | gtgataacac  | tgсacctaac  |
| 15601 | gggctctttt  | atggctattt  | cctgaaatcc  | ttttctgacc  | ttattgtaaa  | aattaacatc  |
| 15661 | catttcttca  | tatttattct  | tgtcttttgc  | tctattttaac | ccaactttta  | catcaatatc  |
| 15721 | tagaataaat  | gtaatatctg  | gacattttaat | ttctactaac  | ttatgtaagt  | cccttatttag |
| 15781 | ccctaaatca  | acactaagcc  | catatccttg  | gtatgcaata  | gttgaatcaa  | taaaccgatc  |
| 15841 | acaaatcact  | atttttcctt  | ctgcaagagc  | tggtaatatt  | aatttttttca | tatgttcgcg  |
| 15901 | cctcatcgaa  | ataagtagca  | agagttcaga  | aataggatca  | atattattcg  | ttaacaacac  |
| 15961 | tcctcttatc  | ttttctgcaa  | agttagtgcc  | acctggttct  | cgagtcaata  | ccacattatt  |
| 16021 | ttcgccgtga  | atttgcttaa  | aatgatttgc  | aagtagctta  | gattgtgttg  | ttttaccaga  |
| 16081 | gccgtctatt  | ccttcgaaag  | ttatgaacat  | aagttttata  | attataatac  | taaaaaagaa  |
| 16141 | tatgcaaaca  | gtatacatag  | aaaccgtttg  | acattttaaat | aataagaccg  | taaattacat  |
| 16201 | gtggtataat  | aatagtctat  | ggttgctctg  | aatactccta  | aagtcgattt  | tagttttact  |
| 16261 | gcaaaagatt  | ttaatctttt  | gggagtagac  | aataaatact  | atacattaag  | tgactgtttg  |
| 16321 | ggaaaaaatg  | gtcttattgt  | aatgtttata  | tgcaatcact  | gtccttacgt  | tcagtcaatt  |
| 16381 | attagtaatc  | tggtaaгсga  | tgttgatcaa  | tgaaaaaag   | attatcaggt  | aaacaccatt  |
| 16441 | gcaataatgc  | caaatgatgt  | aaatgaatat  | ccagaagatt  | cctttgaaaa  | tatgattaat  |
| 16501 | tttgccaagg  | aaaataagtt  | tacattttcca | tattttaattg | atagtacaca  | gaaaatagct  |
| 16561 | aaagaatacg  | gggctgtttg  | cactcctgac  | tttttcggct  | ttaattccaa  | tttaaacctt  |
| 16621 | tgctatcgtg  | gacgttttaa  | caacgcaaaa  | aaagaaaagg  | ttcaaagcta  | tgaagtagga  |
| 16681 | agtagtgact  | tatttcaagc  | tatgaaattt  | attgcagaaa  | ctggtaattc  | tccaattgac  |
| 16741 | caaaaatcaa  | gtattggctg  | ctcaattaaa  | tggtctaatt  | ctacaggtta  | aatatcatgc  |
| 16801 | acagtggctc  | tcagcatttg  | tttgatatta  | taattttgct  | ttctgctgct  | gtgtttatag  |
| 16861 | tcatagcatt  | ttggaaaatg  | aatattagtc  | cagtgccttg  | ttacttcggt  | gcagggtgcag |
| 16921 | ttattgggtc  | tcacggattt  | aatctgatac  | actcagctga  | agcaatggat  | aatcttgсag  |
| 16981 | aatttggtgt  | agttttttcta | ttattcatta  | taggccttga  | attgacattt  | gaacgcctga  |
| 17041 | tcgctatgсg  | tattcatgta  | tttggtttcg  | gttctcttca  | agttatagtt  | accatggtag  |
| 17101 | caatatgggtg | catcgctctt  | gctttcggag  | tgaatacgaa  | tatagcaaca  | gttattgggtg |
| 17161 | gtgggгcttgс | gctatcctca  | acagcaatag  | tgttgcagggt | tctgcaagaa  | aaagggttctc |
| 17221 | aagcaagtca  | ggttggtaga  | ttgtcgatag  | cagtgcctatt | aatgcaagat  | tttgсagtgг  |
| 17281 | taccattaat  | agtattggta  | cctttactta  | ctggcaattc  | tgagcacagc  | ctgataagct  |
| 17341 | cattggcagg  | ttcattgggtg | caagcagcta  | ttgcattagt  | gctgatattt  | ataactggta  |
| 17401 | gattattgct  | tagaccttta  | ttttcggtta  | ttgctaaaat  | ggaaagtaat  | gagatcttta  |
| 17461 | tatcaacaac  | gctttttaata | gtattaggag  | cagcattttat | tactgagcaa  | ttccattttat |
| 17521 | cgttagcatt  | aggtgcattt  | gttgctggat  | tgttagttgc  | agaaacagaa  | tatagacact  |
| 17581 | cagtagaaca  | cgcagtatтg  | ccattttaaag | atттgtttct  | tgгcттattt  | ttcatgactg  |
| 17641 | ttggtatgtc  | catcaatacc  | gaactttttac | tcaataagtt  | accactaatt  | acttttattat |
| 17701 | cgattatcct  | tatcgtttta  | aaaacatcta  | ttatatatat  | attgtgtaga  | ttttttgggt  |
| 17761 | ttaagagtgc  | acctgctata  | caagctgggt  | tactgctttc  | acaaggcggt  | gaatttgсgt  |
| 17821 | ttatttttatt | tcgcttagca  | gatgagctaa  | atgtgctacc  | aagtgaaatc  | gctcaagtac  |
| 17881 | ttatgatggt  | aactacagta  | accatggcct  | tcactcctct  | tttatcaggг  | cttgгagatt  |
| 17941 | ggatagcaaa  | ctcattttagc | actgagaaaa  | caatattaga  | tgatgaagct  | gttgaaacag  |
| 18001 | atacacaaga  | tctttataac  | catgtgatag  | ttgctggatt  | tggtagagtg  | ggatatatgg  |
| 18061 | taacaaaaat  | gcttacggca  | gagcattttaa | gttacgttgt  | tgtagatatt  | caatcgaaaa  |
| 18121 | tagtcaaaga  | aggaaaaagt  | gatagttttc  | ctatatatct  | tgгagatggt  | acaagatgtg  |
| 18181 | aaatttttaaa | atcggttagga | atagaaaagag | ctcaagctct  | cgттattttca | ataaagaatg  |
| 18241 | aagttactat  | aaaaaaaagt  | gtttcttttag | ttgcagcaaaa | ttttccgcат  | gtaaaatattg |
| 18301 | taatacgctt  | accagatctg  | agtaatgtgg  | aggттtatag  | agatctagga  | gctagtaaaa  |
| 18361 | ttattcctga  | aacatctgag  | ataggattgc  | agctaggtgг  | agctgcactg  | agccttagtg  |
| 18421 | gtattagcga  | aagtggagtt  | atgtcttttaa | aaagtagatt  | cagaaaaaggc | aattacagta  |
| 18481 | tgttaaaaga  | ccttggtagt  | gataaagatg  | aataactact  | tctctaattt  | tatgtacaga  |
| 18541 | aagcttcaag  | ctttatttgag | gttttgсcta  | tagtaaatta  | cgcacataat  | caaccaaatт  |
| 18601 | aaggaaagtg  | caaaccaagt  | gattgcataт  | tccaaatgct  | tcattggctg  | tatagctact  |
| 18661 | ttgctgccaa  | aattgttcgг  | ccacaatata  | cacttctcta  | gcttaataacc | taactcattg  |
| 18721 | gaaattttctt | ctgtactcag  | ggtaaaccat  | gtattcgaag  | tagtatcgтт  | cttgataaac  |

|       |             |             |             |             |             |             |
|-------|-------------|-------------|-------------|-------------|-------------|-------------|
| 18781 | caatTTTTgc  | TTTTactgct  | attgcaatat  | aaaactccac  | ctgcagctac  | TTTTtcaatt  |
| 18841 | TTtgctcttt  | cctctTTTT   | ttctTTaact  | attcctttgt  | tcactagcat  | ataatttcca  |
| 18901 | gtagtaagta  | gcataggaga  | taacacatga  | tatccatatt  | gccctgcaaa  | aacatatagt  |
| 18961 | tctatgtcac  | ttagaatccc  | atcgatcttg  | acatgcctat  | agttaaatTT  | ttcaagggtcg |
| 19021 | ttattggggca | atagatgaac  | aactggaaga  | ctcataTTTT  | tgataaatatt | attcttccag  |
| 19081 | ttcaatctga  | atacttgcca  | taatcctaatt | aaaaaaagga  | gcaagcaagg  | tacaattaaa  |
| 19141 | ataaatacta  | TTTTTTTTaa  | cactctatat  | ttgtgttctt  | aaatagTTTT  | caacacccat  |
| 19201 | tagttcaata  | aggtcaatct  | gtttctcaat  | ccaatggaag  | tgctcttctt  | cattTTTTaa  |
| 19261 | catctcttct  | aataacatta  | cactaacaaa  | atctTTTTtct | ttctcagcga  | tagaaatcgt  |
| 19321 | ttctttgata  | tccttaatac  | cttttccctc  | taatttcaaa  | ttagcttcta  | agattttccg  |
| 19381 | tattgtgtct  | tttgtaaact  | ctccatcatg  | ctttgatatt  | tcgtttgtat  | cctgaaaatt  |
| 19441 | tggaactcct  | ttaaataaca  | aaattctttc  | tgccaacttg  | tttgcattgt  | caagttcttc  |
| 19501 | gttaagctca  | TTTTttacct  | tttctgcaag  | tctattaatt  | ccattatttt  | tgagaatcgc  |
| 19561 | aaaatgcaaa  | agatactggc  | gtacagaagt  | cagctcattg  | gtcaataatt  | tattcaaatg  |
| 19621 | TTTTactatc  | tcttcattca  | taatcttccc  | ttagttcaat  | tcatcagcat  | aatttatatg  |
| 19681 | ataacgatag  | ttatagcaac  | tcatttaata  | gttcctttga  | taacaaccgt  | attaaatagc  |
| 19741 | atgtcgtggg  | atgtctgttt  | cttttttagaa | aaacaagcaa  | ctagatacca  | gcagagagtg  |
| 19801 | agcagcacta  | tcattacttt  | caatgcactc  | aagacattca  | ctaatacttc  | ctgatcttgc  |
| 19861 | aaaaattcag  | taaggataac  | tgctacactg  | tttaacaaag  | gaagaaaaaa  | ctgggaagtg  |
| 19921 | cttctgtcaa  | acgctaaatt  | caagtctatt  | ttagaattat  | ctaaattgat  | agtatatata  |
| 19981 | ttcagtaact  | gttgccggg   | agttgcttgg  | gcctttgaag  | atataaaaata | tgtgaagtaa  |
| 20041 | ctacaattta  | cacacatgta  | tgatagatgt  | aagatcaacg  | gagaatcctc  | taatagcagt  |
| 20101 | ataattaata  | aagttggaat  | taataaaaatt | gctacatcta  | ttcaatacgc  | gcaaaagcgc  |
| 20161 | cttttttatgc | tggcaatctc  | tgtcattacc  | tatcttcta   | atactttatt  | acaaaatctg  |
| 20221 | taagtttatc  | aaaatgttga  | aaacataaca  | aatcttcata  | accgcttatt  | gattgaccgt  |
| 20281 | atataatagg  | taaacaattg  | gcattttgtg  | cacacagaac  | atctgtgatg  | ctatcaccaa  |
| 20341 | cgaaaaacac  | atTTtctcta  | tttataggca  | acgtactctc  | ttctagtga   | aatagcagtg  |
| 20401 | gggttgacaga | tgggttatct  | tccgcggtat  | cgcatgaccc  | aaccactctt  | tcaaagtaag  |
| 20461 | aatccagttt  | aaaataggta  | acttcttcac  | gtaaatagat  | atTTttctta  | ttacttacta  |
| 20521 | ttgctagata  | aacattgtgg  | cttttcagtg  | tctgcaacat  | ttcctctact  | ccttgattca  |
| 20581 | gagcaatggt  | ttgtaatagc  | gcattatcta  | agtattgttg  | atatatctga  | ttcgctTTTT  |
| 20641 | tccactgatc  | gccaaataaa  | ttgaccatat  | agctctttct  | cgactcatgg  | gaatttctat  |
| 20701 | cagcagcttt  | attactatac  | cccattgagt  | ttatgggatg  | cttaatagca  | ttaaaaatat  |
| 20761 | tatcttgagt  | gtcaactaag  | gtattatccc  | aatcgaatac  | tactgctaatt | gggctgTTTT  |
| 20821 | tcatttctat  | attgttatat  | atTTtaagtt  | aataaataaa  | tagcattttta | atgaaaaaga  |
| 20881 | tataaatagg  | acgctctacc  | acaagttatg  | ttaactgttt  | tttatataat  | tagctaatat  |
| 20941 | actggttata  | tgatatgttt  | taataggtaa  | taggtatggc  | ccagacatct  | caagaaagtg  |
| 21001 | ttgaaaaaaa  | gttttaaagac | gtctttgaac  | gttctccagg  | tgctTTTTcca | gaagggtactt |
| 21061 | cattagaaga  | gaaggttaat  | tatatcgcaa  | aaggaacaaa  | ggctctaaaa  | gctgtgaaaa  |
| 21121 | gtaaggagct  | tgagaacaaa  | atgaaaaacg  | ttgcagaatt  | gaatcagaaa  | cttgaaagtc  |
| 21181 | aagaaggacg  | tgcatgatga  | aaagcacgtc  | aagattttga  | aagaattgct  | gagcttgacc  |
| 21241 | aacaatataa  | agggaagggc  | atcttcacaa  | gtgaaaaagt  | tgcatgaatta | aaaaatgaca  |
| 21301 | aaaaatttca  | agaagcagct  | aacactctta  | gagaaactac  | aacagaagggt | aaaagtgttg  |
| 21361 | aacagagtgg  | acaaaaaaaag | acttctgagg  | cttctgtaca  | aacagatata  | cagccatcag  |
| 21421 | agcacatcgt  | tagtccctca  | gtgagcaaga  | gttctgtaaa  | agagaagctc  | aacactgagc  |
| 21481 | cggacaaaaa  | agataccacg  | cctcaaccac  | aagaaaaatca | aaaagaagaa  | gggtTTTTga  |
| 21541 | gtcttctgaa  | gcgctttgtt  | aagaaaaatat | tagaaaaaact | tttgggtgag  | gatgaaaaaga |
| 21601 | gtgtggagaa  | tactcatgac  | atgagagaag  | atgctcaaag  | agatacgtca  | aataacgaag  |
| 21661 | agcaacaaaa  | gagtaagcag  | cttgatgaaa  | TTTTaaagga  | caaaagtgtg  | agcgaggggtt |
| 21721 | tgaagcaggc  | aacaaagctt  | gagaacccgg  | caataacgcc  | tgTTaataact | cctaaagtga  |
| 21781 | atgaagtaaa  | cacgggtcgt  | gaaaggtgat  | ccgctttcaa  | gcttcattat  | accgccacga  |
| 21841 | accgtcatac  | cgccgcggta  | tctcatccgc  | taacaagtag  | cgggatgacg  | attgtcaggg  |
| 21901 | tgtcatccca  | gtgtccctat  | gatgtcatcc  | cagtgccctg  | actacttgga  | tctagcaagc  |
| 21961 | TTtgcttgca  | aataagtcta  | atacgcgctc  | cgTTTTatgc  | caaaacacaa  | ttggagtTac  |
| 22021 | atgcaaaaata | gatcccagtg  | tcagctactc  | ggatgacaaa  | aaaaggagca  | ctgggatgac  |
| 22081 | accatttggt  | gtatttaaca  | aagttcgtac  | ttagcttcat  | gttagctata  | aacattaaga  |
| 22141 | aattttacaa  | gcgaaaaaaa  | aggcaaaaga  | agccccagct  | aatatctatt  | ttagaacatt  |
| 22201 | ggcgTTTTtt  | aagtcttaaa  | cactgcaatt  | tagctgcttt  | taaatgcaac  | tcaccttagt  |
| 22261 | TTaaatgttt  | aagaaattta  | ctaagcagaa  | aaaaaggcaa  | aagaaacccc  | gtgttagcta  |
| 22321 | gttgtcactc  | cctaattcctg | caaattggcg  | tactatactg  | tcttaaacga  | cttataagcg  |

```

22381 cgtttcagct tgtgtaggta aaaacctaga aatattgtga agacataagg tgcacatagt
22441 gcaaaaaaatt aaaaataaga cgccaactac gttgttttct tgctgtttta tctgcacaga
22501 tgaagataac tgaatacctt cagtttcatg ataagggggc tggcggagtt tgtcaagtaa
22561 gttttttcgt ttctaacggt tgttgccaaa aactatgcaa gaagtctatt gacagggtgat
22621 taaattataa tgtagcctat cgccgtatat ccgggggtgg gttgttgtga ggctttttca
22681 ctttttattc ttgttaatgt gtttttctct gtattactat gcgggtttta ttttttcgcc
22741 ctgcccacaaa gctacggttt gcttttcacc tggagaagat tgtgctgtac cgataatcaa
22801 cgtaatagat cagtctaaaa aatctatctt agttcaagaa tatacattta ctcttggaac
22861 agttgcaaaa tctttgatta atgctaaaga acgcggtggt gatgttaaag tcatcttaga
22921 taaatcgcaa ctctactcaa aatatagtgt tataaatgaa ttatttttcag gtggagtacc
22981 aatttggtatc gatgataagc caaagattgc tcataataag ataatgattg ttgacaatca
23041 aaaagtcatc acaggggtcat ttaaccttag taagacagct aaaaaaggaa atgctgaaaa
23101 tttattaatt attacagatt atcctgaatt gattcagcag tatgtgaaaa actgggaggc
23161 acgaatgtca caatcttaca aatacgctcc caactaatcg agagcgcttg ctcaaaatca
23221 gtttttaaaaa cagcaaggga gagctttttt gattgattgg cataatgatt atgatataat
23281 gaactaaaaa ttttaaggaat aaagtaatgg attatataaa tgatgctgcc ggtagctaca
23341 ctgctattca tgattttttt caaaacaacg gtgttgagga tt

```

//

```

LOCUS      JAQZAU010000058                19355 bp    dna        linear    ENV 17-MAR-2023
DEFINITION MAG: Wolbachia pipientis isolate wEsol contig_36250, whole genome
            shotgun sequence.
ACCESSION  JAQZAU010000058 JAQZAU010000000
VERSION    JAQZAU010000058.1
DBLINK     BioProject: PRJNA929258
            BioSample: SAMN33142973
KEYWORDS   WGS; ENV; Metagenome Assembled Genome; MAG.
SOURCE     Wolbachia pipientis (insect metagenome)
ORGANISM   Wolbachia pipientis
            Bacteria; Pseudomonadota; Alphaproteobacteria; Rickettsiales;
            Anaplasmataceae; Wolbachieae; Wolbachia.
REFERENCE  1 (bases 1 to 19355)
AUTHORS    Fiutek,N., Couger,B.M., Roy,S., de la Torre,J.R. and Connor,E.F.
TITLE      Genomic assessment of the contribution of the Wolbachia
            endosymbiont of Eurosta solidaginis to gall-induction
JOURNAL    International Journal Molecular Sciences
REFERENCE  2 (bases 1 to 19355)
AUTHORS    Fiutek,N., Couger,B.M., Roy,S., de la Torre,J.R. and Connor,E.F.
TITLE      Direct Submission
JOURNAL    Submitted (10-FEB-2023) Biology, San Francisco State University,
            1600 Holloway Ave, San Francisco, CA 94132, USA
COMMENT    ##Genome-Assembly-Data-START##
            Assembly Date      :: JUN-2019
            Assembly Method    :: FLYE v. 06-2019
            Genome Representation :: Full
            Expected Final Version :: Yes
            Genome Coverage     :: 100.0x
            Sequencing Technology :: Illumina HiSeq; PacBio Sequel
            ##Genome-Assembly-Data-END##
FEATURES   Location/Qualifiers
            source              1..19355
                                   /organism="Wolbachia pipientis"
                                   /mol_type="genomic DNA"
                                   /submitter_seqid="contig_36250"
                                   /isolate="wEsol"
                                   /isolation_source="galls on Solidago altissima"
                                   /host="Eurosta solidaginis MN-2018-EFC"
                                   /db_xref="taxon:955"
                                   /environmental_sample
                                   /country="USA: Cowling Arboretum, Carleton College,
                                   Northfield, MN"

```

```

/lat_lon="44.48 N 93.13 W"
/altitude="280 m"
/collection_date="2018-11"
/metagenome_source="insect metagenome"
/note="metagenomic"
gene complement(<1..873)
/locus_tag="wEsol_00626"
CDS complement(<1..873)
/locus_tag="wEsol_00626"
/codon_start=1
/transl_table=11
/fullproduct="qcoverage 100 , hcoverage 86.865671641791 ,
similarity 100 , identity 100 , evaluate 5.01e-201 ,
alnlength 291 , Bacteria , Proteobacteria ,
WP_015589155.1 MULTISPECIES: tRNA
(adenosine(37)-N6)-threonylcarbamoyltransferase complex
transferase subunit TsaD [unclassified Wolbachia]"
/cog="QRI7 COG0533 342 Metal-dependent proteases with
possible chaperone activity"
/pfam="Peptidase_M22"
/tigr="TIGR03723 bact_gcp 314 putative glycoprotease GCP"
/product="tRNA
(adenosine(37)-N6)-threonylcarbamoyltransferase complex
transferase subunit TsaD"
/translation="MKTILAVETSCDETAVAIVNSDKQVLAKHILSQVEHKKRGGVIP
EIASRAHMKHLSGLIKSAVEKSNLNFCDLNAIAATSGPGLIGGLIVGTMMAKAIAHVA
QKPFIAVNHLEAHALVIRLLHEVKFPFLVLLISGGHCQFLIAQDVGKYIKLGETLDDS
LGEAFDKVAKMLGLSYPGGPLIEKLAKKGNGTRFKLPRAMIKRSGCNFSFSGIKTAVK
NLVQELKMSEQDVCDVCASFQECISDILLDRVSNAIIMAESLNIKINDFVITGGVAAN
NFLREKLKQHINLNI"
/besthit="qcoverage 100 , hcoverage 86.865671641791 ,
similarity 100 , identity 100 , evaluate 5.01e-201 ,
alnlength 291 , Bacteria , Proteobacteria ,
WP_015589155.1 MULTISPECIES: tRNA
(adenosine(37)-N6)-threonylcarbamoyltransferase complex
transferase subunit TsaD [unclassified Wolbachia]"
gene complement(1313..2050)
/locus_tag="wEsol_00627"
CDS complement(1313..2050)
/locus_tag="wEsol_00627"
/codon_start=1
/transl_table=11
/fullproduct="qcoverage 100 , hcoverage 100 , similarity
100 , identity 100 , evaluate 5.42e-167 , alnlength 245 ,
Bacteria , Proteobacteria , WP_010081987.1 MULTISPECIES:
hypothetical protein [Wolbachia]"
/translation="MLIRNLIKQATQVGSSENAIRYVEYLYQFEKFRNTLNLTSLIK
QNRLSFEIYQEGLVDMEEGVCKTIRSSSVNRYVIVLRKSNPYIIVHELSHMVENELNL
SLEQEFLLHKVYQDIEQNLKQANILVQKIIGQVIFKEIQAYQTAKSRASELFARYFELF
AWAQEVYPKDKEYLIRTQDLNKVFLATGQWKKSYSYLDQMMERIDKEIKEYSNKTATKD
VTKVQSSWTNKFSPGGKKISSIFGDDD"
/product="hypothetical protein"
/besthit="qcoverage 100 , hcoverage 100 , similarity 100
, identity 100 , evaluate 5.42e-167 , alnlength 245 ,
Bacteria , Proteobacteria , WP_010081987.1 MULTISPECIES:
hypothetical protein [Wolbachia]"
gene complement(2964..4100)
/locus_tag="wEsol_00628"
CDS complement(2964..4100)
/locus_tag="wEsol_00628"

```

```

/codon_start=1
/transl_table=11
/fullproduct="qcoverage 100 , hcoverage 100 , similarity
100 , identity 100 , evalue 3.79e-268 , alnlength 378 ,
Bacteria , Proteobacteria , WP_151808057.1 MULTISPECIES:
cysteine desulfurase [unclassified Wolbachia]"
/cog="Nifs COG1104 386 Cysteine sulfinat
desulfinase/cysteine desulfurase and related enzymes"
/pfam="Aminotran_5 Aminotran_1_2 Beta_elim_lyase"
/tigr="TIGR03402 FeS_nifs 379 cysteine desulfurase Nifs"
/product="cysteine
desulfurase"
/translation="MSPFSLNSGCVYADYNATAPISENVKKSIFEVLLKQTLNPSSL
HKRGQEARKILQDARDNVRGAIGVSSDKEIVFTSGATEANNLVMRGIAGYLHVISAIE
HPSILNSACNPYIIPVNQEGIVDFLELEKILSELKGNKAIVSVMMANNETGVIQPIEE
IAEIAHKFGAICHTDTAQSVGKIKVNMEDLGVDLLTSLAHKFGGVAGSGVLIFNKELA
IEPIIIGGGQEKGFRGGTENIVAIAGLSAALQNIPDLLSKMDEVKELRDQLECELLNL
VSDIRIFGKNSKRLPNTSFIYMPGVKSDVQLMHFDLNYIAVSNGSACSSGKVEPSHVL
LAMGATKEQTECSIRISIGPETKPKQDIKKIVDCWYNIYQNSLV"
/besthit="qcoverage 100 , hcoverage 100 , similarity 100
, identity 100 , evalue 3.79e-268 , alnlength 378 ,
Bacteria , Proteobacteria , WP_151808057.1 MULTISPECIES:
cysteine desulfurase [unclassified Wolbachia]"
gene 4256..4954
/locus_tag="wEsol_00629"
CDS 4256..4954
/locus_tag="wEsol_00629"
/codon_start=1
/transl_table=11
/fullproduct="qcoverage 100 , hcoverage 100 , similarity
100 , identity 99.6 , evalue 1.11e-164 , alnlength 232 ,
Bacteria , Proteobacteria , WP_151808056.1 MULTISPECIES:
alpha/beta hydrolase [Wolbachia]"
/cog="COG2945 COG2945 210 Predicted hydrolase of the
alpha/beta superfamily"
/pfam="Abhydrolase_5 Abhydrolase_6 Peptidase_S15
Peptidase_S9 Abhydrolase_1"
/product="alpha/beta
hydrolase"
/translation="MIEVFLNNATRKIEGEYHQSKDANAPVVLVLHHHPQYGGNMDSK
IVHSTYTSFIDNNFSALKINFRGVGKSTGTGFDKGIGELTDAAVAIDWLQEHNPSPNVI
WIAGFSFGAWVAMQLTMRPEIVGFIALSLPVTKYDFSFLSPCPVSGLI IQSSNDTIS
EESDVTELA KRLINSVRSDHMKYHIIDDTNHFLKDKEEEVTQIVDNYIKLRLNSATIS
FQKV KKEVRVKEYA"
/besthit="qcoverage 100 , hcoverage 100 , similarity 100
, identity 99.6 , evalue 1.11e-164 , alnlength 232 ,
Bacteria , Proteobacteria , WP_151808056.1 MULTISPECIES:
alpha/beta hydrolase [Wolbachia]"
gene 5007..5171
/locus_tag="wEsol_00630"
CDS 5007..5171
/locus_tag="wEsol_00630"
/codon_start=1
/transl_table=11
/pfam="LPAM_1 Pfam-B_7772"
/fullproduct="qcoverage 100 , hcoverage 100 , similarity
100 , identity 100 , evalue 7.44e-31 , alnlength 54 ,
Bacteria , Proteobacteria , WP_015589158.1 MULTISPECIES:
lipoprotein [Wolbachia]"
/translation="MFKKLLFFVLAVFMLSGLSKQRKLKSPCIKSNEISISCELYSV

```

```

NDHWLDKYKA"
/product="lipoprotein"
/besthit="qcoverage 100 , hcoverage 100 , similarity 100
, identity 100 , evaluate 7.44e-31 , alnlength 54 ,
Bacteria , Proteobacteria , WP_015589158.1 MULTISPECIES:
lipoprotein [Wolbachia]"
gene complement(5193..5867)
/locus_tag="wEsol_00631"
CDS complement(5193..5867)
/locus_tag="wEsol_00631"
/codon_start=1
/transl_table=11
/fullproduct="qcoverage 100 , hcoverage 100 , similarity
100 , identity 100 , evaluate 9.03e-151 , alnlength 224 ,
Bacteria , Proteobacteria , WP_015589159.1 MULTISPECIES:
ABC transporter ATP-binding protein [unclassified
Wolbachia]"
/cog="SalX COG1136 226 ABC-type antimicrobial peptide
transport system, ATPase component"
/pfam="DUF258 AAA_15 AAA_29 Pfam-B_16450 AAA_22 AAA_21
ABC_tran Pfam-B_3333 SMC_N"
/tigr="TIGR02211 LolD_lipo_ex 221 lipoprotein releasing
system, ATP-binding protein"
/product="ABC transporter
ATP-binding protein"
/translation="MGGNVALELTSVDKSFKDNSAVVKDINLSVTRGQVVALIGNSGA
GKTTILQIAGLLDKPTSGIVTIDGINCTQASNKHKTHVRRNFLSFVYQFHYLLQELSV
LENIMLPQLIAGKSKAEAKKNSQAMLEKFGLENKASSMVSEVSGGERQRVAIARSIVN
SPKLLLADEPTGNLDPTNSFKVFLLLHSYVKENNSSMLIVTHNHLAELKADCIFQLRD
RSLVKL"
/besthit="qcoverage 100 , hcoverage 100 , similarity 100
, identity 100 , evaluate 9.03e-151 , alnlength 224 ,
Bacteria , Proteobacteria , WP_015589159.1 MULTISPECIES:
ABC transporter ATP-binding protein [unclassified
Wolbachia]"
gene complement(5907..6368)
/locus_tag="wEsol_00632"
CDS complement(5907..6368)
/locus_tag="wEsol_00632"
/codon_start=1
/transl_table=11
/fullproduct="qcoverage 100 , hcoverage 100 , similarity
100 , identity 100 , evaluate 8.07e-92 , alnlength 153 ,
Bacteria , Proteobacteria , WP_141456915.1 MULTISPECIES:
heme biosynthesis protein HemY [Wolbachia]"
/cog="sufA COG0316 110 Fe-S cluster assembly scaffold
protein"
/pfam="Fe-S_biosyn Pfam-B_8392 Pfam-B_458 Fe-S_biosyn"
/product="heme biosynthesis
protein HemY"
/translation="MSTNYNINLTDNALKKIHSLEAEQEGDKSSILRVAVSGGGCSGFK
YNFLMDQMKNLSLDDEDDDDYDDEFDDDEDDDDYEESDYRSHSSFSKKGKDIVINDE
NGNPVLMVDNCSAKFLNNSVIDYTEDLSGSGFQIKNAFAKSQCGGNSFSV"
/besthit="qcoverage 100 , hcoverage 100 , similarity 100
, identity 100 , evaluate 8.07e-92 , alnlength 153 ,
Bacteria , Proteobacteria , WP_141456915.1 MULTISPECIES:
heme biosynthesis protein HemY [Wolbachia]"
gene 6416..7615
/locus_tag="wEsol_00633"
CDS 6416..7615

```

```

/locus_tag="wEsol_00633"
/codon_start=1
/transl_table=11
/fullproduct="qcoverage 100 , hcoverage 100 , similarity
100 , identity 100 , evaluate 7.35e-288 , alnlength 399 ,
Bacteria , Proteobacteria , WP_065106726.1 MULTISPECIES:
deoxyguanosinetriphosphate triphosphohydrolase
[Wolbachia]"
/cog="Dgt COG0232 412 dGTP triphosphohydrolase"
/pfam="Pfam-B_1409 HDOD HD HD_assoc"
/tigr="TIGR01353 dGTP_triPase 389 putative dGTPase"
/product="
deoxyguanosinetriphosphate triphosphohydrolase"
/translation="MSNNNLLNYACFPSTKGRYFKEPEDENRSCFQDRDRRIHSN
AFRKLEYKTQVFINYEHDIYRTRLTHSLEVAQIARSIARRLGLNEDITECIALAHDLG
HPPFGHAGEDALKKSVDLNLNENEYFDHNVQAIRILTYLEQKHADFDMNLSWEVI
EGVAKHNGPLLQNAESSTSNQLLLEYNKKYDLKLEEFSSIEAQVASIADDIAYSVDH
LDDALRANLVTIEDLLNVPLIEKMFKDIRSRYSELPQSKLIHESLSGTIGTMISDVVS
QTERNIEDHKIKSVEDVRSNLKMLVTFSPEVANATKEMKRFRNMEKIYRSYKLSRTMNK
AKRIIQELFQCFYENPGLLPTEWSKLACESQRSVIICDYISGMTDRFAIHEHRRIFDT
SYEMTSF"
/besthit="qcoverage 100 , hcoverage 100 , similarity 100
, identity 100 , evaluate 7.35e-288 , alnlength 399 ,
Bacteria , Proteobacteria , WP_065106726.1 MULTISPECIES:
deoxyguanosinetriphosphate triphosphohydrolase
[Wolbachia]"
gene 7615..8697
/locus_tag="wEsol_00634"
CDS 7615..8697
/locus_tag="wEsol_00634"
/codon_start=1
/transl_table=11
/fullproduct="qcoverage 100 , hcoverage 100 , similarity
100 , identity 100 , evaluate 1.30e-259 , alnlength 360 ,
Bacteria , Proteobacteria , WP_015589162.1 MULTISPECIES:
bifunctional diaminohydroxyphosphoribosylaminopyrimidine
deaminase/5-amino-6-(5-phosphoribosylamino)uracil
reductase RibD [unclassified Wolbachia]"
/pfam="dCMP_cyt_deam_1 RibD_C"
/tigr="TIGR00326 eubact_ribD 343 riboflavin biosynthesis
protein RibD"
/product="bifunctional
diaminohydroxyphosphoribosylaminopyrimidine
deaminase/5-amino-6-(5-phosphoribosylamino)uracil
reductase RibD"
/translation="MTDDHFMSIALRLAEKNLGNVAPNPAVGCVIVKDGTVSEGYTG
IGGRPHAEVVALQNAKDSTHGATIIYITLPCCHHGVTGPCTAKIIKASIKRVVIATID
PDSRVSGRGMKALKEAGIEVEQGIMQKEAKELNVGFFTTKELHRPFIACKVATTLDGK
IATFTGDSKWITSENTNRNWVHELRAKYDAIMIGSNTLINDDPLLTCRLPGLGSRSPIR
LIIDSQGRLEEHNIAKTADKVITWVITNKEVEKKIKNINYLNVSSNAGKVCLKDMA
LKLVSIEGITRLLVEGGVLITELLKCNLIDRLIICRSKGILGNATPFVGDGLGIQFI
NNCYQFKKTKIIEFSEDIVEVWDRSS"
/besthit="qcoverage 100 , hcoverage 100 , similarity 100
, identity 100 , evaluate 1.30e-259 , alnlength 360 ,
Bacteria , Proteobacteria , WP_015589162.1 MULTISPECIES:
bifunctional diaminohydroxyphosphoribosylaminopyrimidine
deaminase/5-amino-6-(5-phosphoribosylamino)uracil
reductase RibD [unclassified Wolbachia]"
gene 8810..9190
/locus_tag="wEsol_00635"

```

CDS 8810..9190  
 /locus\_tag="wEsol\_00635"  
 /codon\_start=1  
 /transl\_table=11  
 /pfam="DUF972 Pfam-B\_6733 CASP\_C"  
 /fullproduct="qcoverage 100 , hcoverage 100 , similarity 100 , identity 100 , evalue 6.99e-55 , alnlength 126 , Bacteria , Proteobacteria , ONI56251.1 transposase [Wolbachia pipientis wUni]"  
 /translation="MSDLLASLLKLCESFKIEIEQLKAEIKRLEIENENFRSENKALRIENAELKERLGLNSQNSSIPSSKELYKLKKKKKSDRKIGAQIGHEGKYRPKMEADEVVKIEFLRVRRRNCDIERAIHSSKS"  
 /product="transposase"  
 /besthit="qcoverage 100 , hcoverage 100 , similarity 100 , identity 100 , evalue 6.99e-55 , alnlength 126 , Bacteria , Proteobacteria , ONI56251.1 transposase [Wolbachia pipientis wUni]"

gene 9202..9672  
 /locus\_tag="wEsol\_00636"

CDS 9202..9672  
 /locus\_tag="wEsol\_00636"  
 /codon\_start=1  
 /transl\_table=11  
 /pfam="DDE\_Tnp\_IS66"  
 /fullproduct="qcoverage 100 , hcoverage 100 , similarity 99.4 , identity 99.4 , evalue 1.15e-106 , alnlength 156 , Bacteria , Proteobacteria , CDR79089.1 transposase,Transposase IS66 family [Wolbachia endosymbiont of Drosophila simulans wAu]"  
 /translation="MLWNTNGRCCCKCGKRKSSRLPEGVTADTFGPKVKSTIAALSGFYKNSKREVANIIKNIFNLDISVGSVSNSEARVAEKCQEAYEQIEQEVSKSEVLHIDETS HYNKGKLGWCWMFASNTASFIKLTESRGMKVLQNSKFCNRNSLRQVRSIQQLLCR"  
 /product="transposase,Transposase IS66 family"  
 /besthit="qcoverage 100 , hcoverage 100 , similarity 99.4 , identity 99.4 , evalue 1.15e-106 , alnlength 156 , Bacteria , Proteobacteria , CDR79089.1 transposase,Transposase IS66 family [Wolbachia endosymbiont of Drosophila simulans wAu]"

gene complement(10292..10972)  
 /locus\_tag="wEsol\_00637"

CDS complement(10292..10972)  
 /locus\_tag="wEsol\_00637"  
 /codon\_start=1  
 /transl\_table=11  
 /fullproduct="qcoverage 100 , hcoverage 100 , similarity 100 , identity 100 , evalue 2.81e-155 , alnlength 226 , Bacteria , Proteobacteria , WP\_015589163.1 MULTISPECIES: ribulose-phosphate 3-epimerase [unclassified Wolbachia]"  
 /cog="Rpe COG0036 220 Pentose-5-phosphate-3-epimerase"  
 /pfam="Ribul\_P\_3\_epim NanE OMPdecase QRPTase\_C His\_biosynth PcrB"  
 /tigr="TIGR01163 rpe 211 ribulose-phosphate 3-epimerase"  
 /product="ribulose-phosphate 3-epimerase"  
 /translation="MSIKIAPSILSADFAKLGEVRKISDLGVDYIHIDVMDGNFVNPITIGPSVVS AIRKYSNLPFDVHLMVKSPGNHIESFINAGADIITVHAEAEIHLERLIRKIKSYKNVND AKKPIQAGVSIVPSTSPSVLEYIIHELDIVLIMTVNPGFGGQEFIHSQ LNKISTIKMIQERNLKTQISVDGGINF SNAADI IKAGADILVAGSAIFKAEDIKKAVNDLKNPSL"  
 /besthit="qcoverage 100 , hcoverage 100 , similarity 100

```

, identity 100 , evalue 2.81e-155 , alnlength 226 ,
Bacteria , Proteobacteria , WP_015589163.1 MULTISPECIES:
ribulose-phosphate 3-epimerase [unclassified Wolbachia]"
gene complement(11075..11503)
/locus_tag="wEsol_00638"
CDS complement(11075..11503)
/locus_tag="wEsol_00638"
/codon_start=1
/transl_table=11
/pfam="zinc_ribbon_5 zinc_ribbon_4"
/fullproduct="qcoverage 100 , hcoverage 100 , similarity
100 , identity 100 , evalue 1.63e-97 , alnlength 142 ,
Bacteria , Proteobacteria , WP_010962781.1 MULTISPECIES:
zinc-ribbon domain-containing protein [Wolbachia]"
/translation="MKIQCNSTKTYLVSPKQIGASGRKVKCTNCNHIWHEYLEEVS
KSHSANIQEKVSGRNFLQNLAFITTLAFATATGLCVVIANGIFPREMNKAYKTISLYK
DSISYKLGKKEQTESPNVKKLAVNKFYQDYLFLSNLRSS"
/product="zinc-ribbon
domain-containing protein"
/besthit="qcoverage 100 , hcoverage 100 , similarity 100
, identity 100 , evalue 1.63e-97 , alnlength 142 ,
Bacteria , Proteobacteria , WP_010962781.1 MULTISPECIES:
zinc-ribbon domain-containing protein [Wolbachia]"
gene 11577..12407
/locus_tag="wEsol_00639"
CDS 11577..12407
/locus_tag="wEsol_00639"
/codon_start=1
/transl_table=11
/fullproduct="qcoverage 100 , hcoverage 100 , similarity
99.6 , identity 99.6 , evalue 3.09e-177 , alnlength 276 ,
Bacteria , Proteobacteria , WP_015589164.1 MULTISPECIES:
2,3,4,5-tetrahydropyridine-2,6-dicarboxylate
N-succinyltransferase [unclassified Wolbachia]"
/cog="DapD COG2171 271 Tetrahydrodipicolinate
N-succinyltransferase"
/pfam="Pfam-B_10572 Pfam-B_54 Hexapep Hexapep"
/tigr="TIGR00965 dapD 271
2,3,4,5-tetrahydropyridine-2,6-dicarboxylate
N-succinyltransferase"
/product="
2,3,4,5-tetrahydropyridine-2,6-dicarboxylate
N-succinyltransferase"
/translation="MEGLQLKKTQSEIEDIWKNNREKFNDNCNLKKTARIAIKEVIELLD
SGKIRVAEKLSSGEWVVKWIKQAILLHFLTEENKIIDNTNCWFDKIGNKFSEWNEEK
FRQLKIRAVPGCFVRRSAYIGTNVVLMPFSFINVGAYVDSGMTIDTWSTIGSCAQIGKN
CHISGGVGIGGVLEPIQASPVIIEDNCFIGARSEVAEGVVVREGSVLGIGVFIGASTK
IIDRETSKVFCGEVPPYSVVVPGSIPSKNNISTYCAVIVKKVDEKTRSKISINEILRD
"
/besthit="qcoverage 100 , hcoverage 100 , similarity 99.6
, identity 99.6 , evalue 3.09e-177 , alnlength 276 ,
Bacteria , Proteobacteria , WP_015589164.1 MULTISPECIES:
2,3,4,5-tetrahydropyridine-2,6-dicarboxylate
N-succinyltransferase [unclassified Wolbachia]"
gene complement(12414..12698)
/locus_tag="wEsol_00640"
CDS complement(12414..12698)
/locus_tag="wEsol_00640"
/codon_start=1
/transl_table=11

```

```

/pfam="DUF2610"
/fullproduct="qcoverage 100 , hcoverage 100 , similarity
98.9 , identity 98.9 , evaluate 1.29e-60 , alnlength 94 ,
Bacteria , Proteobacteria , WP_010962783.1 MULTISPECIES:
DUF2610 domain-containing protein [Wolbachia]"
/translation="MAESIKKFTVQCDFKGQSLPFAIYIGNPKSDAHPIHHQDSWLVK
ERGGNIPNKVKESLQKLYKLSQENGVSFSELCAYAITVVSNNDDKKSDDKE"
/product="DUF2610
domain-containing protein"
/besthit="qcoverage 100 , hcoverage 100 , similarity 98.9
, identity 98.9 , evaluate 1.29e-60 , alnlength 94 ,
Bacteria , Proteobacteria , WP_010962783.1 MULTISPECIES:
DUF2610 domain-containing protein [Wolbachia]"
gene complement(12699..13070)
/locus_tag="wEsol_00641"
CDS complement(12699..13070)
/locus_tag="wEsol_00641"
/codon_start=1
/transl_table=11
/fullproduct="qcoverage 100 , hcoverage 100 , similarity
100 , identity 100 , evaluate 1.22e-74 , alnlength 123 ,
Bacteria , Proteobacteria , WP_041573529.1 MULTISPECIES:
hypothetical protein [unclassified Wolbachia]"
/translation="MDDKNTDYVVLIAQDDSIYKFEEAVNFNIENKVINADGLTLAEV
FQVLVQMLDGDALVKKVLAYANIMAKHGMKVAKESQLSRADVRRALEGRESVVNRQD
FIKKPPLPPAIKSTKKKSRGL"
/product="hypothetical protein"
/besthit="qcoverage 100 , hcoverage 100 , similarity 100
, identity 100 , evaluate 1.22e-74 , alnlength 123 ,
Bacteria , Proteobacteria , WP_041573529.1 MULTISPECIES:
hypothetical protein [unclassified Wolbachia]"
gene 13172..14221
/locus_tag="wEsol_00642"
CDS 13172..14221
/locus_tag="wEsol_00642"
/codon_start=1
/transl_table=11
/fullproduct="qcoverage 100 , hcoverage 100 , similarity
100 , identity 100 , evaluate 6.89e-254 , alnlength 349 ,
Bacteria , Proteobacteria , WP_015589166.1 MULTISPECIES:
SAM-dependent methyltransferase [unclassified Wolbachia]"
/cog="COG1565 COG1565 370 Uncharacterized conserved
protein"
/pfam="Methyltransf_28"
/product="SAM-dependent
methyltransferase"
/translation="MLTYIHELIDKSQGSISISDFMNAVLYHEKYGYTYSKLPLGKDG
DFTTAPEISQLFGEVIAVWIMHTWEKLGKPSKFSLSVELGPGKGTLIHDIIRVTKKYSS
FFNSMLIHLVEISPTLRKIQKEKLKSLDVNWHKNIDNLPEQPTIFLANEFFDALPVDQ
FVYRDGQWYENMVTQDDGSLVSCQCVTLESRKESWIPVSATQMTNGKFFNGAVVE
ICSVGVEILKKLEKKIYNNKGAALIVDYGIVYPAYKSTLQSIKQHKYANFLENVGNDS
ITALVNFQALRDSLKHVDCEILTQREFLYLFGIKERTQALMKASASDEQKNRIFSEFLR
LTENMGTLFKAMLLI"
/besthit="qcoverage 100 , hcoverage 100 , similarity 100
, identity 100 , evaluate 6.89e-254 , alnlength 349 ,
Bacteria , Proteobacteria , WP_015589166.1 MULTISPECIES:
SAM-dependent methyltransferase [unclassified Wolbachia]"
gene complement(14462..15913)
/locus_tag="wEsol_00643"
CDS complement(14462..15913)

```

```

/locus_tag="wEsol_00643"
/codon_start=1
/transl_table=11
/pfam="Terminase_6"
/fullproduct="qcoverage 100 , hcoverage 100 , similarity
99.6 , identity 99.2 , evalue 0.0 , alnlength 483 ,
Bacteria , Proteobacteria , WP_141457085.1 phage
terminase large subunit [Wolbachia endosymbiont of
Carposina sasakii]"
/translation="MNFLKFIELCFQTVVPGCEYNDYQYIKVIADRLEAASAGEVKRI
IFNMPPRSMKSMCISVAWPAWILGNQPTARIIVASYSQRLSEKHS�DTRCVMQSSWYR
ALFPEIELSKDQNTKYKFQTVQRGYRIATSVGGTTLTGEGGDFIIVDDPLSSAQALSET
LRKRAINWFDQTLVTRLNDRKKGIVIVLVMHRLHQEDLTGHLLSKPKNIWHHICLPMIS
ENKQVIYSIKKPMPVPVIRVAQHCATRRLYNKPASPVRIILYSREESQLLYPLDGGKE
EIEMIKVELGSYAFAAQYQQNPLPLSSGIIKPEWLKRYKKFPDNLSHITQSWDTAVST
SDMSNFSVCTTWAKIDNKFYLLDVYRAKLEYPKLKEQVLSLAARWSPHAILIEAKTSG
QQLAQELKANSHLPIIEIVPHDGLARFHRIAPMIESGRIILPHQAVWLNDFEYEILM
FPETRHDDQVDSTVQYLQWVRNSTSRVAAIRAL"
/product="phage terminase large subunit"
/besthit="qcoverage 100 , hcoverage 100 , similarity 99.6
, identity 99.2 , evalue 0.0 , alnlength 483 , Bacteria ,
Proteobacteria , WP_141457085.1 phage terminase large
subunit [Wolbachia endosymbiont of Carposina sasakii]"
gene complement(16896..18470)
/locus_tag="wEsol_00644"
CDS complement(16896..18470)
/locus_tag="wEsol_00644"
/codon_start=1
/transl_table=11
/fullproduct="qcoverage 100 , hcoverage 100 , similarity
99.8 , identity 99.8 , evalue 0.0 , alnlength 524 ,
Bacteria , Proteobacteria , WP_015589167.1 MULTISPECIES:
penicillin-binding protein [unclassified Wolbachia]"
/cog="FtsI COG0768 599 Cell division protein
FtsI/penicillin-binding protein 2"
/pfam="PBP_dimer PBP_dimer Transpeptidase"
/tigr="TIGR03423 pbp2_mrdA 593 penicillin-binding protein
2"
/product="penicillin-binding
protein"
/translation="MWTKNKVFNRRAFILGGIQLTISAVFSCRLYNLQIRNRQKYEAL
SNSNRIRVATIMPKRGKILDRNSIELAVNKISYVVLFDGSGKEVDLQTLSEVESKIAK
SSEKITALYKRYYPFGSMCSHVIGYTKRQQGISVGVISGIEYTYDHILKGKSGKSEQE
INSKKRVIKELSSIPQQDGQDVQLTIEINLQEKTAEVFKDHQGSASVVIDVNNGEILAL
YNPSYDNNLFASRLSNETWENLNAPSLPLVNRALSYQIPPGSIFKVIIVALAGLKDGI
ITSEEKFSCKGYMKIGERKFRCLKSKVHGYSVLNEAMALSCNTYFYFNIGKKISVDSL
VEMARKFGIGSGPLIGTFKEEAPGLLPDRDWRTRKLYSQWYLGDTINLVIGQGYMLTTP
LQLAVLAARIATGKEVIPHIEMSKTIQDFPDIDVDCEHLSIVRKAMFDVNSKTGTYK
KGLSGIQIAGKTGTPEINSKGESHKLFIAYGPYHNPRYAISVFIEHGKAPRQDVAIAN
EIFQYMLETMSIKLLA"
/besthit="qcoverage 100 , hcoverage 100 , similarity 99.8
, identity 99.8 , evalue 0.0 , alnlength 524 , Bacteria ,
Proteobacteria , WP_015589167.1 MULTISPECIES:
penicillin-binding protein [unclassified Wolbachia]"
gene complement(18425..19264)
/locus_tag="wEsol_00645"
CDS complement(18425..19264)
/locus_tag="wEsol_00645"
/codon_start=1
/transl_table=11

```

```

/fullproduct="qcoverage 100 , hcoverage 100 , similarity
100 , identity 100 , evalule 5.32e-200 , alnlength 279 ,
Bacteria , Proteobacteria , WP_015589168.1 MULTISPECIES:
polysaccharide deacetylase family protein [unclassified
Wolbachia]"
/cog="CDA1 COG0726 267 Predicted xylanase/chitin
deacetylase"
/pfam="Polysacc_deac_1"
/product="polysaccharide
deacetylase family protein"
/translation="MFIRIITFFLLYSSTAFCSDCNFNLPYCGLSCNLDLSYRNLSNI
KKLLNNDDKFVALTFDDGPSNNRINDIINVLESYEAKATFFVLGERINEKTSEIVKKI
HESGHELGNHWSHRKLTSLSSEEQLQELEKTNTAIKNAIKQDVKWFRPPYGCYDDNL
IENTDQLNMYSILWTVDSLWQGDKPETLVERVLSNVHNGAVILFHDHNNRSNTIEAL
PHI IKILKKSDYKFVTLSEWEKRV CNTV KARSVTI KEGKKVCFEGMLCGQKTKSLTAE
HSY"
/besthit="qcoverage 100 , hcoverage 100 , similarity 100
, identity 100 , evalule 5.32e-200 , alnlength 279 ,
Bacteria , Proteobacteria , WP_015589168.1 MULTISPECIES:
polysaccharide deacetylase family protein [unclassified
Wolbachia]"

```

# ORIGIN

```

1  tatgtttaag tttatgtggt gttttaattt ttctctcaag aaattatttg ctgcaactcc
61  gccggtaatc acaaagtcac tgattttgat atttaaagat tcggccataa taatcgcatt
121 actaaccttg tccagcagta tgtcactaat acactcttga aacgaagcac atacatcaca
181 cacatcttgc tcgctcattt taagttcttg tactaagttt tttactgctg ttttaatccc
241 agaaaacgaa aagttacatc cagaacgttt tatcattgcc cttggcagtt tgaatcttgt
301 gccattgcct tttttagcca acttttcaat taatgggcct cctgggtagc ttaaaccag
361 catcttagca actttatcaa atgcttctcc tagtgaatca tcgagcgttt ctccaagttt
421 aatgtattta cctacatcct gtgcaattaa aaattgacag tgaccacctg atattagtag
481 gactaaaaat ggaaatttta cctcatgcag taacctaaata accaatgcat gcgcttctaa
541 gtgattcact gcaatgaacg gtttttgtgc tacatgcgca attgcttttag ccatcattgt
601 accaactatt aatccaccta tgagtcctgg tcctgatggt gctgcaattg cattgaggtc
661 acaaaagtta aggttagatt tttccacggc gctttttatt agaccactta aatgcttcat
721 atgagcacgt gaagctatct cagggatcac cccaccgcgt tttttgtggt ctacttgaga
781 aagaatcttg tgagcaagga cttgcttggt actatttaca atcgctactg cagtttcgtc
841 gcagcttggt tcaacagcta aaatggtttt catgtatat tagttactgt attaccaaaa
901 ctatactttg aaacgctata gaagttaact gcaaagttaa cttctatagc taaaagattt
961 accgacaacc gtcattccgc tacgtgttag ctgatgagat accgcgcaca actgtacgaa
1021 cattcattct taaaggtaaa ctgcacagca aatggtgtca ttccagtgtc tgacactgga
1081 atccagcctt gccgtaatct catcaagaac gttgtgtttt aacataagat cagccacttt
1141 tatgctcacc aacttagtgc ccaatccaaa ttcttggtat ccagtgtcaa gcactggaat
1201 gacaccatct actactcaaa ttacctgcaa attgcaatgt tcgtacacca aaagaatgaa
1261 tcgcggtatg acggttcgcg gcggcatgac gtaggaaaac ctgcactata agctaatacat
1321 catctccaaa tatagagcta atttttttgc cccagaggaga aaatttatta gtccaactgc
1381 ttgcaacttt gggttacgtc ttagtggcag ttttattgct gtattccttg atttccttat
1441 ctattctctc catcatttgt gaatcaagg agctcttttt ccattggcca gtagcaagga
1501 acactttggt taagtcttga gtgcggatta agtattcttt atctttaggg taaacctcct
1561 gcgccaagc aaatagctca aaatagcgtg caaataattc agatgcacgt gattttgcag
1621 ttgataagc ctgtatctcc ttaaataata cttggccgat aattttctgc acaagaatat
1681 ttgcttgctt taggttctgc tcaatatcct ggtaaaactt atggagaaat tcctgttcca
1741 aacttaagtt cagttcatct tcaaccatgt gtgaaagttc atgcactata atgtatgggt
1801 ttgacttcct cagtacaata acatatctat ttacactgga agacctgatt gtcttacaca
1861 ctccctcttc catatccact aatccctctt ggtatatatt aaatgagagc ctgttttgct
1921 ttattagtga taaagtgagg tttaatgtgt ttctaaactt ctcaaattga tagagatat
1981 cgacataacc tattgcattt tcaactgctt ctacttgagt tgcttgtttt attaaattcc
2041 tgattagcat accttattat taaaggaatt ctttttatac tcaagaattg attggctaca
2101 aagtgttttt aggaagcctg attgcatagc taaagtaatt catgtttact gataaccgtc
2161 ataccgctgc ttgtcagcgg gatctatggt gagataaccg gaatgaatcc atagctgtac
2221 gaacattcat ttttgaaggt aaattgcaca gcaaatggtg tcattccagt gctctttttt

```

|      |              |              |              |              |               |              |
|------|--------------|--------------|--------------|--------------|---------------|--------------|
| 2281 | tgtcatccca   | gtctgggatc   | tatthttgcat  | gtaactccaa   | ttgtgtttttg   | gcataaaacg   |
| 2341 | cgacacgtat   | tagacttatt   | tgcaagcaaa   | gcttgctaga   | tccaagtagt    | cagggcactg   |
| 2401 | ggatgacatt   | acaggggcac   | tgaaatgaca   | ccatthttcgg  | tctcttaaat    | tgcttttagcc  |
| 2461 | ataaatattht  | aagaaattht   | ctaaataaaa   | aaaaggcaaa   | agaagccccg    | tggtggttgg   |
| 2521 | ctatthtacta  | tgtactaaaa   | tatcggcgth   | thttthtattc  | taaaacgctt    | gattaagagc   |
| 2581 | gatttagctg   | ctthttaactt  | gcaactaacc   | tacaccgcaa   | gtgtthtaaga   | aatttactaa   |
| 2641 | gcaggaaaaa   | aggcaaagaa   | accccgtagt   | agctagcatt   | caaattctcc    | cttgtcaatt   |
| 2701 | tgacgtthttt  | tgctgtctta   | aacgctthtg   | aagcgcgtht   | cggcttatat    | aggtaaaaac   |
| 2761 | ctaaaaattht  | ttaaagacat   | gcgatgcacg   | tagtgcgaaa   | aattaaacat    | gagacgcaa    |
| 2821 | ataccctaag   | thttthtgta   | ttaacctgca   | cagattgcga   | agataaataa    | atagcttcac   |
| 2881 | tgttatgata   | agggggctgg   | cgaaacttgt   | aaaggaaatt   | thttacatcta   | atthtatagct  |
| 2941 | ccctgcatga   | tatcacgtat   | tatctataacc  | aaggagttht   | gcttgtagat    | attataccaa   |
| 3001 | caatccacta   | thttthtttat  | gtcttggtgt   | thagtthctg   | gacctatact    | gattctaatt   |
| 3061 | gaacactctg   | thtgctctth   | tgthgcccc    | atthgcaagca  | aaacatggga    | aggctcaact   |
| 3121 | thttccagaag  | aacatgcgga   | gccattacta   | actgcaatat   | aattcaagtc    | aaaatgcatg   |
| 3181 | agctgcacat   | cactctthtac  | tcctggcata   | taaaataaaac  | ttgtgtthtgg   | cagcctctta   |
| 3241 | gagthttthtac | cgaagattct   | tatgtcactg   | acaagattta   | ataattcaca    | ctctaattga   |
| 3301 | tcgcgtagct   | cctthtacttc  | atccatthtt   | gatagaagat   | ctggaatatt    | thgtagtgca   |
| 3361 | gcagaaaggc   | ctgcaatcgc   | aacaatatht   | tcctgaccac   | cacgaaatcc    | cttctcttgt   |
| 3421 | ccaccaccta   | ttataatagg   | thctatcgca   | agthctthtat  | tgaatattaa    | aactccactg   |
| 3481 | cctgctacac   | cgccaaatth   | atgggcggat   | aaagtgaagta  | aatccactcc    | taaatcttcc   |
| 3541 | atattaactt   | taatthtccc   | aacactthtga  | gcagtgtcag   | tgtgggcaaat   | tgctccaaat   |
| 3601 | ttgtgggcta   | thttcagctat  | thcctcaata   | ggttgaataa   | ctccggthttc   | gthatttgcc   |
| 3661 | atcataactg   | aaactattgc   | thtgthttcct  | thtaagthcgc  | thtagaathtt   | thctagctct   |
| 3721 | aaaaagtcaa   | caatgccctc   | ctgattaacg   | ggtattatgt   | atggattaca    | thgcagaatta  |
| 3781 | agaattgaag   | gatgctctat   | agctgaaatt   | acatgcaggt   | agcctgctat    | tcctctcata   |
| 3841 | acaaggthtat  | tcgcttcggt   | thgcaccagac  | thgaaaacta   | thttctthtatc  | acttgagacg   |
| 3901 | ccaatagcac   | cacgtacgtt   | atctctthtga  | tcctgaagaa   | tccttcctcgc   | thcttgctct   |
| 3961 | ctthttatgta  | gtgatgatgg   | attgagcgth   | thgtthtaaca  | agacctcaaa    | tatactthtt   |
| 4021 | thttacattht  | cactaattgg   | agcagthtga   | thgtaatcag   | catatacgca    | accactatth   |
| 4081 | thctaaagaga  | atggactcat   | ctgtcactta   | aataagthta   | ccatcaacta    | tagccataac   |
| 4141 | tatgtacgtt   | agctthtaaca  | cgataaaaaa   | thttattgcaa  | aaacagcgaa    | attaatacat   |
| 4201 | aattaataaac  | tcacgtcatt   | aatacctgtc   | aagcgggtht   | thtattagggg   | thaccatgat   |
| 4261 | tgaagthttth  | thtgaataatg  | caacaagaaa   | gatagaagg    | gaataccacc    | aaagcaaaga   |
| 4321 | thgccaacgcg  | ccggtthgtgc  | thggtthttaca | thcatcatcct  | caatatgggtg   | gtaatatgga   |
| 4381 | tagtaaaaatt  | gtacatagta   | catatacgth   | thtttatcgat  | aacaatthtt    | ctgcattgaa   |
| 4441 | gattaacttht  | cgtgggtgtgg  | gaaaatctac   | cggaacttht   | gataagggtta   | taggagaatt   |
| 4501 | aactgacgct   | gcggtagcca   | thgattggct   | tcaggaacat   | aatcctagca    | atgthtccaat  |
| 4561 | thggatcgct   | ggtthttctt   | thggagcatg   | ggtggctatg   | cagctaacaa    | thgcgccgcc   |
| 4621 | thgagatagtg  | ggtthttattg  | ctctthtctct  | tcgggttaact  | aagtacgatt    | thttctthttct |
| 4681 | thtctccctgt  | ccagthttctg  | ggctthataat  | acaaagcag    | aatgatacaa    | thtcagaaga   |
| 4741 | aagcgatgta   | acagaattag   | caaaaaggth   | gataaattca   | gtaagaagtg    | atcacatgaa   |
| 4801 | ataccatata   | atagatgata   | ctaatcactt   | thctaaaggat  | aaagaagagg    | aagtgactca   |
| 4861 | aatcgtggac   | aattatataa   | aactgcgctt   | gaatagtgca   | actatthtctt   | thcaaaaagg   |
| 4921 | caaaaaagag   | gtaagggtta   | aagaatatgc   | ctaatcttht   | caaacaagag    | aaatgagtgt   |
| 4981 | agtaatatata  | atgaaaagg    | thtgthtatgt  | thtaaaaagct  | atthattthtt   | gthtttagctg  |
| 5041 | thgtthtatgt  | atcgggggtgt  | thccctaagta  | aacagcgcaa   | gthtaaaaagt   | ccgtgtataa   |
| 5101 | aaagcaatga   | aagcattthtca | thgcgagthtg  | actctgttht   | thgatcattgg   | thtagataagt  |
| 5161 | ataaggcata   | gaaattgtgc   | thttthttcct  | atthcacaa    | thcactaatga   | thcgatctctc  |
| 5221 | aattggaaaa   | thgcagtctgc  | ctthttctgca  | aggagatgat   | thgtgtgttac   | tataagcata   |
| 5281 | gagctgttat   | thttcctthtac | gtatgaatgt   | agcagtaaaa   | acacctthaaa   | agaattthgtt  |
| 5341 | ggatctaaat   | thtctgtthg   | ctcatctgca   | agtaaaaagct  | thtggaagaatt  | tacaatgctt   |
| 5401 | ctthgcaattg  | caactctctg   | ctthttcccca  | cccgaaaactt  | cagataccat    | gctacttgct   |
| 5461 | thgtthttcca  | gaccaaatth   | thccaacatt   | gctthgcgaat  | thttthttthtgc | thtcagcttht  |
| 5521 | ctthtttctg   | caatgagtht   | aggaaagcata  | atthttthtcca | acaccgataa    | ctctthgtaac  |
| 5581 | aaatagtga    | atthgataaac  | aaaactaaga   | aaatthtctt   | thtacctgagt   | thttatgctta  |
| 5641 | thtactggctt  | thgtgcaatt   | tattccatct   | atcgtaacta   | thacctgaagt   | thggctthgtcc |
| 5701 | aacaagcctg   | cgattthgcaa  | tatagthttht  | thtccctgcac  | ctgaattggc    | aatcagcgct   |
| 5761 | actactthg    | ctctthgtaac  | actthaaattg  | atthtcttht   | caacagcaga    | atthgtcttht  |
| 5821 | aagctthttat  | ctacagaagt   | tagthtctagt  | gctacattac   | cacctatgth    | taaaagatcc   |

|      |             |             |             |             |             |             |
|------|-------------|-------------|-------------|-------------|-------------|-------------|
| 5881 | agaaggcatc  | taagtttttag | taataattaa  | accgaaaaac  | tgttaccaca  | accacattga  |
| 5941 | gacttagcaa  | aggcattctt  | tatttgaaaa  | ccagaaccac  | tgagatcctc  | agtataatct  |
| 6001 | ataactgagt  | tatttaaaaa  | ttttgctgaa  | caattatcaa  | ccattaatac  | agggtttcca  |
| 6061 | ttttcatcat  | taattactat  | atctttacct  | tttttgctaa  | aactggagtg  | gcttctatag  |
| 6121 | tcctcacttt  | cttcatagtc  | atcatcttcg  | tcttcgtcat  | caaactcatc  | atcgtaatca  |
| 6181 | tcgtcttcat  | catccaaaga  | tagattttta  | ttcatttgat  | ccataagaaa  | attgtatttg  |
| 6241 | aagccagaac  | atccaccacc  | tgaaactgca  | acccgtaaaa  | tggaactcct  | atccccttcc  |
| 6301 | tgctctgcaa  | gagagtggat  | tttttttagt  | gcattatcag  | ttaagttgat  | gttgtaattt  |
| 6361 | gttgacatag  | taaccaccgt  | ttattattga  | taacttatta  | tagtagaaat  | tttacatgtc  |
| 6421 | aaacaataat  | tttctattaa  | attatgcatg  | ttttccaagc  | aaaacaaaag  | ggagatactt  |
| 6481 | caaagagcca  | gaagatgaga  | atcgcagctg  | ctttcagcgt  | gatagggacc  | gtatcattca  |
| 6541 | ctctaattgcg | tttagaaaagt | tgaggatcaa  | aacacaagtt  | tttatcaatt  | atgagcacga  |
| 6601 | ctactatcgc  | actcggctta  | ctcatagcct  | tgaagttgca  | caaattgcaa  | ggtccattgc  |
| 6661 | gcgtagactt  | ggcttaaatg  | aggatatcac  | tgaatgcata  | gcgctcgcac  | atgatcttgg  |
| 6721 | tcatcctcca  | tttggtcatg  | caggtgaaga  | tgctctaaag  | aaatcagttc  | aagatttgaa  |
| 6781 | tcttgataat  | gagaagtatg  | agtttgatca  | taatgttcaa  | gctataagga  | ttttaactta  |
| 6841 | tcttgaacaa  | aaacatgctg  | attttgatgg  | tatgaatcta  | agttgggagg  | tgattgaagg  |
| 6901 | agttgcaaaa  | cataacggtc  | ccttgcttgg  | tcaaaacgcg  | gagtcttcta  | caagtaatca  |
| 6961 | gctgttatta  | gaatacaaca  | aaaaatatga  | tctaaaactt  | gaagaatttt  | caagcattga  |
| 7021 | agcgcaagtt  | gcttcaattg  | ccgatgatat  | tgcttacagt  | gttcacgata  | ttgatgatgc  |
| 7081 | actcagggcg  | aatttagtaa  | ccatcgaaga  | tttgctgaat  | gttcctttta  | ttgaaaaaat  |
| 7141 | gtttaaagac  | ataaggagca  | gatattcaga  | attgcctcag  | agcaaactca  | tacatgaatc  |
| 7201 | actgagtgga  | actataggaa  | ctatgataag  | tgatgttggt  | tctcagactg  | aaagaaatat  |
| 7261 | tgaagatcac  | aaaataaaaa  | gcgtagaaga  | cgtaagaagt  | ctaaataaaa  | tgctagtcac  |
| 7321 | attttcacca  | gaagttgcga  | atgctacaaa  | agaaatgaaa  | agattcaaca  | tggagaaaat  |
| 7381 | atacagaagc  | tataaactga  | gtagaacgat  | gaacaaagca  | aaacgcataa  | tacagggaact |
| 7441 | ctttcaatgt  | ttttatgaaa  | acccaggatt  | acttcccaca  | gagtggagca  | aactcgcttg  |
| 7501 | tgaatctcag  | cgttcagtaa  | taatatgtga  | ctatatctca  | ggtatgacag  | atagatttgc  |
| 7561 | tatacacgag  | cacagaagaa  | tttttgatac  | ctcatacgaa  | atgacttctt  | tctaattgact |
| 7621 | gatgatcatt  | tcatgtcaat  | tgcattaagg  | cttgacagaaa | aaaatccttg  | aatgttgca   |
| 7681 | ccaaatcctg  | ctgtcgggtg  | tgttattgta  | aaggatggta  | caattgttag  | tgagggatac  |
| 7741 | acagggattg  | gtgggctgcc  | gcatgcggag  | gtagtcgctt  | tgcaaaacgc  | taaagattca  |
| 7801 | actcatggcg  | caactatata  | tatcactctt  | gagccatggt  | gtcatcacgg  | agtcacgggg  |
| 7861 | ccttgcaactg | caaaaatcat  | aaaagctagc  | ataaaaagag  | tagtaattgc  | aactattgac  |
| 7921 | ccagatagta  | gagtttccag  | cagaggcatg  | aaagctctga  | aagaagcagg  | aattgaagtt  |
| 7981 | gagcaaggta  | ttatgcaaaa  | agaggcaaaa  | gaactgaatg  | tcggtttttt  | caccactaaa  |
| 8041 | gaattacata  | gaccatttat  | agcttgcaaa  | gtcgcaacaa  | ctcttgacgg  | aaaaatcgca  |
| 8101 | acattttacag | gcatagacaa  | atggataaca  | agtgaaaata  | cgagaaattg  | ggtgcatgag  |
| 8161 | cttagagcaa  | aatatgatgc  | aattatgatt  | ggcagcaata  | ctcttattaa  | tgatgatcca  |
| 8221 | ctcttaactt  | gcagattacc  | aggacttgga  | agtagatcgc  | caataagggt  | aattatagat  |
| 8281 | agccaaggga  | gattaaagga  | agagcataac  | attgcaaaga  | ctgcagacaa  | agtaataact  |
| 8341 | tgggtcatca  | caaataaaga  | agtagagaaa  | aaaataaaaa  | acattaacta  | cttagtagtt  |
| 8401 | aattcaagca  | acgcaggtaa  | ggtttgctta  | aaggacatgg  | cattaaaact  | tgtttcagaa  |
| 8461 | attgggtataa | caagattatt  | agttgaaggt  | ggaggagtgt  | taatcacaga  | actattaaag  |
| 8521 | tgtaattttaa | tcgacagggt  | gataatatgc  | cgcagtggta  | aaatttttagg | caatgatgcc  |
| 8581 | actccttttg  | taggagattt  | agggattcaa  | ttcattaaca  | actgttatca  | gttttaaaaa  |
| 8641 | acaaagataa  | tagagtttag  | tgaggatata  | gttgaggttt  | gggataggtc  | gtcataatcc  |
| 8701 | ttacatactc  | aaacagtaaa  | aaaaaggtat  | ccgttcagcg  | gagcggtaaa  | ataaaaagta  |
| 8761 | gacaaggagt  | gctaaaaaca  | taatatcaca  | agtagtatgt  | gtggtaaata  | tgtctgatct  |
| 8821 | actagctagt  | cttctcaagc  | tctgtgaaaag | ctttaaaata  | gagatagagc  | aactaaaagc  |
| 8881 | agagataaaag | aggtttagaga | tagaaaacga  | aaatttttaga | tctgagaata  | aggcgctaag  |
| 8941 | aatcgaaaaat | gctgaattga  | aagaaagact  | aggtctgaat  | tcacaaaatt  | catcgatacc  |
| 9001 | gagctcaaaa  | gagttataca  | agctaaaaga  | gaaaaagaaa  | aaaagtgaca  | ggaaaaatagg |
| 9061 | ggcacagatt  | gggcatgaag  | gaaagtatcg  | ccctaaaatg  | gaagcagatg  | aagtggtgaa  |
| 9121 | aatagagttc  | ttgctgagtc  | ggaggagaaa  | ttgcgatatc  | gaaagagcca  | tacattcatc  |
| 9181 | aaaaagttga  | tttgccagct  | tatgttggtg  | aataccaatg  | gccgctgttg  | caagtgtgga  |
| 9241 | aaaagaaaaa  | gtagcaggct  | accagaaggt  | gttactgcgg  | atacatttgg  | tccaaaagtt  |
| 9301 | aagtcaacaa  | ttgcggcgct  | gagcggattt  | tacaagaact  | cgaaaagaga  | agtagcaaat  |
| 9361 | attataaaaa  | atattttcaa  | cctggacatc  | agtgttggtg  | gcgtgtcaaa  | tagcgaggct  |
| 9421 | agagttgcag  | aaaaatgcc   | agaagcatat  | gagcaaatcg  | agcaagaagt  | aagtaaaagt  |

|       |             |             |             |             |             |             |
|-------|-------------|-------------|-------------|-------------|-------------|-------------|
| 9481  | gaagttctgc  | atatcgatga  | aacgagccat  | tataacaaaag | gtaaacttgg  | ttggtgctgg  |
| 9541  | atgttttgcca | gtaatacagc  | aagttttata  | aaattgacag  | agtcaagagg  | aatgaaggtt  |
| 9601  | ttacaaaata  | gtaagttctg  | caatcgcaat  | agcttacgac  | aggtacgcag  | catacaacta  |
| 9661  | ctttgccgat  | aagaacaggc  | aaatctgttg  | ggcacattta  | tcaagagatt  | ttgaaagatt  |
| 9721  | agcacatagt  | tgaagttaaa  | gttctgggct  | gttacttaag  | aaacgtagcc  | actgaattat  |
| 9781  | ttgcactaaa  | aaaggccttg  | ctaaaaaatg  | agatagatgt  | ttttagattt  | accagacgtg  |
| 9841  | ccagaaaatt  | gcgaaaacgt  | acaagggtatt | acttgaagcc  | gtttacctga  | agcaattgga  |
| 9901  | gcttctcgag  | ttgcaaaaaa  | tatttttga   | tctgaaagaa  | taatgtggaa  | tttttttagat |
| 9961  | gacccagaaa  | acattccgct  | gacaaataac  | catgctgaac  | ggcaaatacg  | gcattatgtc  |
| 10021 | gtttatcgca  | aaaattcata  | ttttacccaa  | tcgaagtggg  | gaacttgaac  | ggataatttc  |
| 10081 | attatacttg  | acatggaaac  | aaatgggctt  | tccaaaacct  | cttatctatc  | atctctcaca  |
| 10141 | ccgcttagct  | gaacggatac  | aacccaagaa  | aggtttttct  | acgtcatacc  | gccgcggtat  |
| 10201 | ctcagcatag  | attccgctaa  | cgagtagcgg  | aatgacgaat  | ttggtgtttt  | tcaaattgta  |
| 10261 | ggtaaaccta  | agccacttta  | gctatatagg  | gtcacaacga  | tggattttta  | agatcgttta  |
| 10321 | cggcttttct  | aatgtcttca  | gccttgaata  | tcgccgatcc  | cgcaactaaa  | atatctgcac  |
| 10381 | ctgcttttat  | tatatcagct  | gcgttagaaa  | agttaattcc  | accatctact  | gaaatttggtg |
| 10441 | ttttaagatt  | acgctcctgt  | atcatttttt  | ttatagtaga  | tatcttgttc  | aactgtgaat  |
| 10501 | gaataaattc  | ctgccctcca  | aagccagggt  | tgactgtcat  | aatcagcaca  | atatctagct  |
| 10561 | catgtattat  | atattcaagc  | acacttgggg  | aagttgaagg  | aacaattgag  | actccagctt  |
| 10621 | gaatcggttt  | ttttgcatcg  | tttacatttt  | tgtatgactt  | tatcttttct  | atcaacctct  |
| 10681 | caaggtgtat  | ctctgcttct  | gcatgtacag  | tgataaatatc | agcaccagca  | tttataaagc  |
| 10741 | tttcaatgtg  | gttaccagga  | gatttgacca  | ttaaatgcac  | atcaaaagga  | agattgctat  |
| 10801 | atttacgtat  | tgcagagaca  | acgctaggac  | caattgtaat  | atgttggaacg | aaattcccat  |
| 10861 | ccataacgtc  | tatgtgtatg  | taatctacac  | ctaaatcgct  | aatttttctt  | acttcttctc  |
| 10921 | ctaattttgc  | aaagtctgct  | gaaagtatag  | aaggtgcaat  | tttaatactc  | atgagctgcc  |
| 10981 | ttttttacta  | aaaaataact  | tattttttaa  | ctctgtcacc  | ctaaacacca  | tctaagtagc  |
| 11041 | tagagaagct  | ggataccgat  | atcgggtatgc | ctattttaact | agatcttaaa  | ttagataaaa  |
| 11101 | aaaggtagtc  | ttgataaaac  | ttattttacag | caagtttttt  | tacatttgga  | ctttctgttt  |
| 11161 | gttctttttt  | gtacccta    | ttatagctta  | ttgaatcctt  | gtataaactg  | atcgttttgt  |
| 11221 | atgcttttgt  | catctctcta  | ggaaagatgc  | cattagcaat  | tacgacgc    | aaccctgtag  |
| 11281 | ctggttgcaa  | agctagagtg  | gtaaatgcta  | gatttttgtaa | aaaatttcct  | ccactaactt  |
| 11341 | ttttttcctg  | tatattagca  | gagtgcgatt  | tgtttgacac  | ttcttctaga  | tattcatgcc  |
| 11401 | atatgtgatt  | gcagttcgta  | catttttacct | ttcttccaga  | tgcacctatt  | tgcttaggag  |
| 11461 | atactaagta  | agtttttagta | caactattac  | attgtatttt  | catagcactt  | acataatagt  |
| 11521 | agtaacaagc  | ccaaatgata  | cgagctacaa  | atttaatatc  | aatatatata  | taacaaatgg  |
| 11581 | aaggtttgca  | actaaaaaaaa | acacagagtg  | agatagaaga  | tattttggaaa | aatagagaaa  |
| 11641 | aattttaatga | ctgtaatcta  | aagaaaacag  | caagaatagc  | aattaaagag  | gtaattgagc  |
| 11701 | tccttgatag  | tggcaaaaatt | agagtagcag  | aaaagctatc  | aagtggagaa  | tgggtagtac  |
| 11761 | ataagtggat  | aaagcaggca  | atattattac  | attttctcac  | cgaagaaaat  | aaaataatag  |
| 11821 | ataatactaa  | ttgctgggtt  | gacaagatcg  | gtaacaaaatt | tagtgaatgg  | aatgaggaga  |
| 11881 | aatttcgccca | gttaaaaatt  | agagcagttc  | ctgggtgttt  | tgttcgccga  | tctgcttata  |
| 11941 | taggtacaaa  | tgttgttcta  | atgccaaagt  | ttatcaacgt  | tggtgcatat  | gttgattcag  |
| 12001 | gaacaatgat  | agataacctg  | tcaacgattg  | gtagctgtgc  | gcaaatagga  | aaaaactgtc  |
| 12061 | atattttccg  | tggagtgagg  | ataggtggag  | ttcttgagcc  | tattcaagct  | tcacctgtca  |
| 12121 | ttatagaaga  | taattgcttt  | attggagcac  | gtagcgaagt  | ggccgagggg  | gtggtagtga  |
| 12181 | gagaaggatc  | agtccttggc  | ataggtgtgt  | ttattggggc  | atcaacaaa   | attattgata  |
| 12241 | gagaaactag  | caaggtattt  | tgcggcgaag  | tgccacctta  | ttctgtagt   | gtaccagggg  |
| 12301 | ctattccatc  | taaaaataat  | atttcaacct  | attgtgcagt  | catagtaaaa  | aaagtggatg  |
| 12361 | aaaagacgag  | atcgaaaatc  | tctataaatg  | aaatattgag  | ggattaaaact | atcttactcc  |
| 12421 | ttgtcgtcac  | tttttttatc  | attattacta  | accacagtaa  | tggcatacgc  | gcataactct  |
| 12481 | gagaaagaga  | ctccattttc  | ttgagatagt  | ttatataatt  | tttgtagact  | ttcttttact  |
| 12541 | ttattaggaa  | tattccctcc  | acgttctttt  | acaagccagg  | aatcttgatg  | atgaattgga  |
| 12601 | tgagcatcac  | tttttggtat  | tcctatgtat  | attgcaaaa   | gtaaactttg  | tcctttgaag  |
| 12661 | tcacattgta  | cagtaaaatt  | ttttatagat  | tcagccatct  | aaagacctct  | acttttcttt  |
| 12721 | ttggtcgatt  | ttatagcagg  | tgggaagggt  | ggtttcttta  | taaaatcttg  | tctattgaca  |
| 12781 | acacttttct  | taccttccaa  | agctcggcga  | acatcagctc  | tgcttaattg  | cgactctttt  |
| 12841 | gctaccttca  | ttccatgctt  | tgccataata  | ttagcatatg  | ctagtacttt  | ttttaccaat  |
| 12901 | gctagatcac  | catctagcat  | ttgaactagc  | acttgaaaca  | cttccgctaa  | agttagccca  |
| 12961 | tcagcattta  | taaccttggt  | ttctataaaa  | ttgacagctt  | cttcaaattt  | gtattcaata  |
| 13021 | ctatcatctt  | gagctataag  | gacaacataa  | tcggtgtttt  | tgctcgtccat | aactgaagca  |

|       |             |             |             |             |             |             |
|-------|-------------|-------------|-------------|-------------|-------------|-------------|
| 13081 | ctattactca  | caaacttaag  | tgtatactat  | atatataaat  | actctactat  | tttatattat  |
| 13141 | ggcacgctat  | agttaaacat  | ttattaataa  | catgctcact  | tatatacacg  | aattaattga  |
| 13201 | caaaagtcaa  | ggatcaatat  | ccatcagtga  | tttcatgaat  | gccgttttgt  | accatgaaaa  |
| 13261 | atacggctat  | tatacaagta  | aattaccgct  | tggttaaggat | ggtgatttta  | ctaccgcacc  |
| 13321 | tgagatcagc  | caattatttg  | gtgaagtaat  | tgcagttttg  | ataatgcata  | catgggaaaa  |
| 13381 | attaggaaag  | ccatcaaaat  | tttctctagt  | tgaacttggt  | ccaggcaaag  | gaacactcat  |
| 13441 | tcacgatata  | ataagagtca  | ctaaaaaata  | cagcagcttt  | tttaattcaa  | tgttgatcca  |
| 13501 | cttagttgaa  | ataagcccta  | ctttacggaa  | gatacaaaaag | gaaaaattaa  | aaagcttaga  |
| 13561 | tgtaatttgg  | cacaaaaata  | ttgacaacct  | accagaacaa  | ccaaccattt  | ttttagcaaa  |
| 13621 | tgagttcttt  | gacgctcttc  | cggtagatca  | gtttgtttac  | cgcgatgggc  | agtggtatga  |
| 13681 | aaatatgggtg | acaaaacaag  | atgatggcag  | tctcttggtg  | tcatgccagt  | gcgtgacact  |
| 13741 | ggaatccaga  | aaaaaagaat  | catggattcc  | agtgtcagct  | actcagatga  | caaatggaaa  |
| 13801 | attctttaat  | ggtgcagtgg  | tggaaatatg  | ttcagttggg  | gttgaaatat  | taaaaaaact  |
| 13861 | tgagaagaag  | atatataata  | ataaaggagc  | tgctttgatt  | gtagattacg  | gttatgtata  |
| 13921 | ccccgcatat  | aagagcactt  | tgcaatcgat  | aaaacaacat  | aagtatgcta  | attttcttga  |
| 13981 | gaatgttggt  | aatagtgata  | ttaccgcact  | tgtgaacttt  | caagcgttaa  | gagattcatt  |
| 14041 | aaagcatgta  | gattgtgaga  | ttttaactca  | aagggaattt  | ttatatcttt  | ttggcataaa  |
| 14101 | agaaagaacc  | caggctttta  | tgaaaagcgc  | aagtgatgaa  | caaaagaata  | ggatcttttag |
| 14161 | tgaattccta  | aggttgactg  | aaaatatggg  | cactcttttt  | aaagcaatgc  | tattgatata  |
| 14221 | gctaacccaa  | gaaagggttc  | cctacgtcat  | accgccgcga  | tatctcagca  | tagattccgc  |
| 14281 | taacgagtag  | cggaatgacg  | agcttattgt  | catgccgccg  | cgaaccgtca  | taccgccacg  |
| 14341 | aactgtcata  | ccaccacgaa  | ccgtcatacc  | gcgattcatt  | cgcggtatct  | ctagatcccc  |
| 14401 | ctaacaagca  | gcgggatgac  | ggttgtctcc  | tagctgtcat  | cccagtactg  | gtagactcaa  |
| 14461 | atcacaatgc  | tcgtatagct  | gcaaccctgg  | aggtactggt  | tctcaccac   | tggagatatt  |
| 14521 | gcacgggtact | atctacttga  | tcacgtggc   | gcgtttctgg  | aaacattaaa  | atttcatact  |
| 14581 | caaaatcatt  | tagccatact  | gcttgatgcg  | gcaaaataat  | cctgccagac  | tctatcatcg  |
| 14641 | gagcaatccg  | gtggaatcga  | gcgagcttac  | catcatgtgg  | cactatttcg  | ataatgggca  |
| 14701 | aatgactggt  | tgccttcagc  | tcttgtgcta  | attgctgacc  | acttgttttg  | gcttcgatca  |
| 14761 | aaatcgcggtg | tggtgaccat  | cttgacgcta  | gtgataaaac  | ttgttcttta  | agctttggat  |
| 14821 | actcaagctt  | tgcgcgatat  | acatcaagta  | aatagaattt  | attatctatt  | tttgcccagg  |
| 14881 | tggtgcagac  | actaaagtgt  | ctcatgtcgc  | ttgttgaaac  | cgcagtatcc  | caactttgtg  |
| 14941 | ttatatgcga  | gagattatca  | ggaaattttt  | tatagcgttt  | caaccactct  | ggtttaatta  |
| 15001 | taccacttga  | aagcggcgaga | gggtttttgtt | gatattgagc  | agcaaaagcg  | taactcccaa  |
| 15061 | gttcaacctt  | tatcatctca  | atttcttctt  | ttcctccatc  | taggggatat  | agcaactgac  |
| 15121 | tttcttctct  | tgaatataat  | atccttacag  | gtgacgctgg  | tttattatat  | aatcgcttgg  |
| 15181 | tcgcacagtg  | ctgagctact  | cggatgacag  | gaacgggagg  | cattggcttt  | ttgattgaat  |
| 15241 | aaataacctg  | cttatttttca | gaaatcattg  | gcaaacaaat  | atgatgccat  | atgttttttg  |
| 15301 | gcttgagag   | aagggtgtcca | gttaagtcct  | cctggtgtag  | cctgtgcatt  | acaagaacga  |
| 15361 | tgactccttt  | ttttctatcg  | ttcagcctgg  | ttactaaagt  | ctgatcaaac  | cagtttatgg  |
| 15421 | cacgctttct  | aagcgtttca  | ctcaaagctt  | gagcagaact  | gagcggatcg  | tccacaatga  |
| 15481 | taaaatcacc  | accttcacca  | gttagtgttc  | caccaactga  | tgttgcgatt  | ctgtatcctc  |
| 15541 | tctgcactgt  | ttgaaattta  | tattttgtat  | tctggtcttt  | ggatagttct  | atctctggaa  |
| 15601 | atagcgctct  | ataccaacta  | gactgcatca  | cgcacctggt  | gtcgagcgag  | tgcttttcgc  |
| 15661 | tgagccgctg  | agaataactt  | gcaactatta  | ttctcgcagt  | tggttgggtt  | cccagtatcc  |
| 15721 | atgcgggcca  | cgcaacgctt  | atgcacatgg  | acttcacgca  | gcgcggaggc  | atattgaata  |
| 15781 | ttattcggtt  | cacttcacca  | gcgctcgtg   | cttcacgcct  | atctgctatg  | acttttatat  |
| 15841 | actgataatc  | gttatactca  | caccccggea  | ctaccgtttg  | aaagcacagt  | tcaatgaatt  |
| 15901 | ttagaaagtt  | catgatataa  | tggtgaaacc  | aacgcgtgac  | gctgggatga  | caaaaaaagg  |
| 15961 | agcactgaag  | gctataggtg  | agacgtcgcg  | gtatctctag  | atcccgttaa  | caagcagcgg  |
| 16021 | gatgatgaat  | tactatgccg  | ccgcgaaccg  | tcataccgcc  | gcggtatctc  | agccgctaac  |
| 16081 | aagtagcgga  | atgacaacaa  | tcctacgtca  | taccgccgcg  | gcgctaacaa  | gagatccccg  |
| 16141 | taacaagcag  | cgggatgacg  | aattacttaa  | ccatcatcta  | caccgtcata  | ccgccgcggt  |
| 16201 | atctcagccg  | ctaacaagca  | gcgggatgac  | gaggtcatgc  | caccgcgcga  | accgtcatac  |
| 16261 | cgccgcggta  | tctctagatc  | ccgctaacac  | gtaggggaat  | gacgaggtca  | tgccgccgca  |
| 16321 | aaccgtcata  | ccgcgattca  | ttcgcggtat  | ctctagatcc  | cgctaacaag  | tagcgggatg  |
| 16381 | acgattgtcg  | tttagccata  | aacattaaga  | aattttaccaa | ataaaaaaaaa | ggcaaaagaa  |
| 16441 | gccctgggggt | tattatccgc  | tttaaaatat  | tggcggtttt  | tatgttttaa  | acgcttgaca  |
| 16501 | agcgaaattc  | agctgctttt  | aattgcaact  | aacctacgct  | gcaaatgttt  | aagaaattta  |
| 16561 | ctaagcagaa  | aaaaagacaa  | agaatccccg  | agtttagctag | tcttttacta  | tctctgtcga  |
| 16621 | gtattggcat  | tttttgatgt  | cttgtaacgc  | tttataagcg  | cgttcagctt  | atthagataa  |

```

16681 aaatctagat gtagatgaag ttttgtaaag acatacagta tctatatact gcaaaaaaatt
16741 gaacataaga cgccgataca ttaagtaatc cttacctttt aatctgcaga ttggcgaaag
16801 caaatacaat agcttcacta tcatgataag agcgtggtcg aaggggtgtca agtaagtttt
16861 ttcgttttcta ttcccaataa aagtttggtta tatggttatg caagaagttt aatactcata
16921 gtttcaagca tatactgaaa tatctcatta gcaattgcaa catcttggcg tggggccttg
16981 ccgtgttcta taaacacaga gattgcatag cgcgggttat ggtaagggcc ataggcgata
17041 aataacttat gactttcgcc cttagagttt atttctggtg taccggtttt gccagcaatt
17101 tgtataccgc ttagcccttt cttataggtt ccagttttag aattcaccac atcaaacata
17161 gcttttcgaa ctatgctaag atgctcacia tccacatcaa tatcgggaaa atcttgtatc
17221 gttttactca tctcaatgtg gggaattacc tcttttcctg ttgcaatcct cgctgcaaga
17281 actgcaagct gtagtggtgt tgtaagcata tacccttgct ctataactaa gttgatagt
17341 tcacctaaat accactgcga atatagcttt cgtgtacgcc aatctctatc tggcaacaac
17401 cctggagctt cttctttaaa cgttccaatc agtggccac ttccaatacc aaattttctg
17461 gccatttcta ctagagagtc tacacttatt tttttcccta tattataaaa gtaagtgttg
17521 catgataatg ccattgcctc atttaaagat acatacccat ggactttgct tttcagacaa
17581 cgaaatttcc gctcacctat tttcatatag cccttgcacg agaatttctc ttctgatgtt
17641 attatcccg tttttaaac cgcaagcgca actattactt taaatattga accaggtgga
17701 atttgatatg ataacgcacg attcacaagc ggtaatgaag gagcattcaa gttttcccaa
17761 gtctcatttg atagcctgct agcaaaaaga ttattatcgt aagaaggtga attatataat
17821 gctaaaattt ctccattatt tacatcaatt accactgcgg agccttggtg atctttaaat
17881 acctctgcgg ttttctcttg cagattaatc tcaattgtca gttgtacatc ttgtccgtct
17941 tgttgtggta tgcttgataa ttcttttatg acgcgttttt tagaatttat ttctgtctca
18001 gattttcctg acttgccctt caatatatga tcatatgtat attcaatacc gctgattcct
18061 acttcgctta tgccttgctg tctttttgta tatccgatta catgagaaca cattgaacca
18121 aacgggtaat aacgtttata aagagcagtt attttttctg acgattttgc tattttagac
18181 tcgacttctg ataattgtctg caaatcaact tccttaccag aaccatcaaa caaaacaaca
18241 tacgaaattt tgtttaccgc aagttcaatg ctattcctat ctaaaatttt gccccgctta
18301 ggcataatag tagcaactct tattctatta ctattagata gtgcttcgta cttttgtctg
18361 tttcgtattt gttaaattata taacctgcaa ctaaaaccg cagaaatggt aagctgaata
18421 ccacctataa tgaatgctct gcggttaaag actttgtttt ttgtccacat aacattcctt
18481 caaaacacac ttttttcccc tcttttattg ttacacttct ggcttttacc gtattacaaa
18541 cccttttttc ccactcactt aaggtcacaa acttataatc tgattttttt agtattttta
18601 taatatgagg taaagcttca attgtgtttg acctgttatt gtgatcatga aacagtataa
18661 ctgctccatt atgtacatta cttaaaactc tttcaactaa agtttctggc ttatcacctt
18721 gccaatctag cgaatcaact gtccataata ttgaatacat atttaattga tcagtatttt
18781 caatcagatt atcgtcataa catccatatg gcggacgaaa ccattttaca tcttgtttta
18841 ttgcattttt aattgctgta tttgtctttt ccaattcttg caattgttcc tcacttgaaa
18901 gtgatgtcaa cttcctatgc gaccaagagt gattgcctaa ctcatgacct gattcatgaa
18961 ttttctttac tatttcagac gttttttcat ttatacgttc accaagcaca aaaaatgttg
19021 cttttgcttc atagctttcc agaacattaa taatatcggt tattctattg ttggaaggtc
19081 catcatcaaa cgtaagcgca acaaacttat cgtcgttatt caataatttt tttatattac
19141 ttaaattttc atatgataga tctagattac aactgagccc acagtatggt aaattaaaaa
19201 tacaatcact acaaaaagcc gtacttgaat atagtaagaa aaaagtgatt atccttataa
19261 acatttgtaa tcagcaaagt gatagaatac tacacttttt tgctaagtta agccatcttt
19321 aattgctgta gcctttactt catcgcttct ttaat

```

//

```

LOCUS      JAQZAU010000059                9449 bp    dna        linear    ENV 17-MAR-2023
DEFINITION MAG: Wolbachia pipientis isolate wEsol contig_36397, whole genome
            shotgun sequence.
ACCESSION  JAQZAU010000059 JAQZAU010000000
VERSION    JAQZAU010000059.1
DBLINK     BioProject: PRJNA929258
            BioSample: SAMN33142973
KEYWORDS   WGS; ENV; Metagenome Assembled Genome; MAG.
SOURCE     Wolbachia pipientis (insect metagenome)
ORGANISM   Wolbachia pipientis
            Bacteria; Pseudomonadota; Alphaproteobacteria; Rickettsiales;
            Anaplasmataceae; Wolbachieae; Wolbachia.
REFERENCE  1 (bases 1 to 9449)
AUTHORS    Fiutek,N., Couger,B.M., Roy,S., de la Torre,J.R. and Connor,E.F.

```

TITLE Genomic assessment of the contribution of the Wolbachia  
 endosymbiont of Eurosta solidaginis to gall-induction  
 JOURNAL International Journal Molecular Sciences  
 REFERENCE 2 (bases 1 to 9449)  
 AUTHORS Fiutek,N., Couger,B.M., Roy,S., de la Torre,J.R. and Connor,E.F.  
 TITLE Direct Submission  
 JOURNAL Submitted (10-FEB-2023) Biology, San Francisco State University,  
 1600 Holloway Ave, San Francisco, CA 94132, USA  
 COMMENT ##Genome-Assembly-Data-START##  
 Assembly Date :: JUN-2019  
 Assembly Method :: FLYE v. 06-2019  
 Genome Representation :: Full  
 Expected Final Version :: Yes  
 Genome Coverage :: 100.0x  
 Sequencing Technology :: Illumina HiSeq; PacBio Sequel  
 ##Genome-Assembly-Data-END##  
 FEATURES Location/Qualifiers  
 source 1..9449  
 /organism="Wolbachia pipientis"  
 /mol\_type="genomic DNA"  
 /submitter\_seqid="contig\_36397"  
 /isolate="wEsol"  
 /isolation\_source="galls on Solidago altissima"  
 /host="Eurosta solidaginis MN-2018-EFC"  
 /db\_xref="taxon:955"  
 /environmental\_sample  
 /country="USA: Cowling Arboretum, Carleton College,  
 Northfield, MN"  
 /lat\_lon="44.48 N 93.13 W"  
 /altitude="280 m"  
 /collection\_date="2018-11"  
 /metagenome\_source="insect metagenome"  
 /note="metagenomic"  
 gene <1..774  
 /locus\_tag="wEsol\_00646"  
 CDS <1..774  
 /locus\_tag="wEsol\_00646"  
 /codon\_start=1  
 /transl\_table=11  
 /pfam="Ribosomal\_S6"  
 /fullproduct="qcoverage 100 , hcoverage 100 , similarity  
 100 , identity 99.6 , evalue 1.14e-174 , alnlength 257 ,  
 Bacteria , Proteobacteria , WP\_065094495.1 MULTISPECIES:  
 30S ribosomal protein S6 [unclassified Wolbachia]"  
 /translation="VNLYEFTFITQQGLLQQEVEEMVQELAVSLKNIKADVMFQQIRD  
 ILKKGNDKLTQTQELVRAENIKEGLVAYSDFLEDLTKILWVELEEDLSNLKEVKSKID  
 KELKDDLKDLGITQDFTKFLGGSTKSAFIHNAVNALKRNISEHLIKIFQDILKDFRIN  
 GPTQSSKALEMLLKNIEASGLIKYEHWGLLDFAFHKNKMKSGHYCIMCISSTASILDE  
 FMRRMKLNENVIRHFPVQVDKIFEGKSHMMNKQIEEQSA"  
 /product="30S ribosomal  
 protein S6"  
 /besthit="qcoverage 100 , hcoverage 100 , similarity 100  
 , identity 99.6 , evalue 1.14e-174 , alnlength 257 ,  
 Bacteria , Proteobacteria , WP\_065094495.1 MULTISPECIES:  
 30S ribosomal protein S6 [unclassified Wolbachia]"  
 gene 774..1049  
 /locus\_tag="wEsol\_00647"  
 CDS 774..1049  
 /locus\_tag="wEsol\_00647"  
 /codon\_start=1

```

/translation=11
/fullproduct="qcoverage 100 , hcoverage 100 , similarity
100 , identity 100 , evalue 2.76e-56 , alnlength 91 ,
Bacteria , Proteobacteria , WP_007548890.1 MULTISPECIES:
30S ribosomal protein S18 [Wolbachia]"
/cog="RpsR COG0238 75 Ribosomal protein S18"
/pfam="Ribosomal_S18"
/tigr="TIGR00165 S18 70 ribosomal protein S18"
/product="30S ribosomal
protein S18"
/translation="MMKRRNSFNNSYVSVNNRTGFRRSKVCPLAASKDEDIDYKNIDL
LSKFTSDYGRILPRRLTGVCARKQKRLRLAIIRARFLALIPYCTKKV"
/besthit="qcoverage 100 , hcoverage 100 , similarity 100
, identity 100 , evalue 2.76e-56 , alnlength 91 ,
Bacteria , Proteobacteria , WP_007548890.1 MULTISPECIES:
30S ribosomal protein S18 [Wolbachia]"
gene 1057..1611
/locus_tag="wEsol_00648"
CDS 1057..1611
/locus_tag="wEsol_00648"
/codon_start=1
/translation=11
/fullproduct="qcoverage 100 , hcoverage 100 , similarity
100 , identity 100 , evalue 3.92e-114 , alnlength 184 ,
Bacteria , Proteobacteria , WP_141457004.1 MULTISPECIES:
50S ribosomal protein L9 [unclassified Wolbachia]"
/cog="RplI COG0359 148 Ribosomal protein L9"
/pfam="Ribosomal_L9_N Ribosomal_L9_C"
/tigr="TIGR00158 L9 148 ribosomal protein L9"
/product="50S ribosomal
protein L9"
/translation="MLIILKENIRTLGKLGEVVKVPGYARNFLFPQRKAVKATKENL
TKLEEQRLLLLLEENIKRLNVAKELALS LHDKFVVLKQASEDGKIFGSVTTREIAKIL
LQEGHVIDHRSLSFGGVS IKNLGEYQVNVELHSEVVVPITIIYVVKSETDANELRQVKL
QNQKSEQQEAEQDANKEAADGDDS"
/besthit="qcoverage 100 , hcoverage 100 , similarity 100
, identity 100 , evalue 3.92e-114 , alnlength 184 ,
Bacteria , Proteobacteria , WP_141457004.1 MULTISPECIES:
50S ribosomal protein L9 [unclassified Wolbachia]"
gene 1875..3140
/locus_tag="wEsol_00649"
CDS 1875..3140
/locus_tag="wEsol_00649"
/codon_start=1
/translation=11
/fullproduct="qcoverage 100 , hcoverage 100 , similarity
100 , identity 100 , evalue 4.55e-300 , alnlength 421 ,
Bacteria , Proteobacteria , EAL58989.1 adenylosuccinate
lyase [Wolbachia endosymbiont of Drosophila ananassae]"
/cog="PurB COG0015 438 Adenylosuccinate lyase"
/pfam="Lyase_1 ADSL_C"
/tigr="TIGR00928 purB 436 adenylosuccinate lyase"
/product="adenylosuccinate lyase"
/translation="MSSIWEENNKFNIWLKIEKLACEAQAKLGVIPNNIAENLSGAIE
FDVECINEIESIVKHDVIAFLTYIAKKAGVDVRYLHYGMTSSDVLDTCLAVQLKESCD
ILLENLKNLLAALKKKAEDYKDIVCVGRSHGMHAEP T T L G I K F A R F Y A E F K R N Y Q R L I
SAQKEISICKISGAVGNFANVDPFVEEYVAKEIGLIPEIISSQVIPRDRHAMFFSVLG
VIASSIENVAVEIRHLQRTEIGEISEHFSTGQKGSSAMPHKCNPILSENLTGLSRLIR
SYVFPALENVALWHERDISHSSVERCIAPDACITMDFALVRLTDLIDKLVINKENIEK
NLNSSKGLVFSQRVLLELVNSGLAREEAYKIVQSNAMKVKQNNSDFLAELKQDKPLLK

```

```

gene VINSEKLESLFDLKYYTKHIDRVYNKVFN"
/besthit="qcoverage 100 , hcoverage 100 , similarity 100
, identity 100 , evalue 4.55e-300 , alnlength 421 ,
Bacteria , Proteobacteria , EAL58989.1 adenylosuccinate
lyase [Wolbachia endosymbiont of Drosophila ananassae]"
CDS complement(3383..4663)
/locus_tag="wEsol_00650"
complement(3383..4663)
/locus_tag="wEsol_00650"
/codon_start=1
/transl_table=11
/pfam="Fe-ADH_2 Fe-ADH DHQ_synthase DHQ_synthase"
/fullproduct="qcoverage 100 , hcoverage 100 , similarity
100 , identity 100 , evalue 1.61e-307 , alnlength 426 ,
Bacteria , Proteobacteria , WP_141457000.1 MULTISPECIES:
iron-containing alcohol dehydrogenase [unclassified
Wolbachia]"
/translation="MHYLKQILHQTEQTFLEVVITDYYLADDIYEICTRHGNDVFLVA
DKNTAKLLNKNVNLKIPNLIIPAPPVIPARDTGIHKLFSWIPVSATCMTPSRAASLET
VNLVRNKAKDSDLIVAFSGTVNDICKYASYLEKKDYISFPTAASMNGYTSANASILV
NGYKKSFKAHLPRAVYIDIDILANAPLRLTLSGFADFICRSTVQADWLLSHLLLGTEY
NELPFTLVRDLEQILLREY TALTKRSRKVVLLMEVLLISGLGMVISKGSYSASQGEH
MIAHAMEMVTRDHSLLHGEKIAVTTITMANLQEKILSIQNPIIKPTLDVEHITQCFD
NIEFVRTFEQKQIMQQKIQEIIICKEWHNISSLIKQNLPAKHLQKIFEDLSIPHLPEH
LSWNKEQYCKVVDLAFTTRDRFTFLDLANCIEES"
/product="iron-containing
alcohol dehydrogenase"
/besthit="qcoverage 100 , hcoverage 100 , similarity 100
, identity 100 , evalue 1.61e-307 , alnlength 426 ,
Bacteria , Proteobacteria , WP_141457000.1 MULTISPECIES:
iron-containing alcohol dehydrogenase [unclassified
Wolbachia]"
gene 4706..5902
/locus_tag="wEsol_00651"
CDS 4706..5902
/locus_tag="wEsol_00651"
/codon_start=1
/transl_table=11
/fullproduct="qcoverage 100 , hcoverage 100 , similarity
100 , identity 100 , evalue 1.43e-289 , alnlength 398 ,
Bacteria , Proteobacteria , WP_015589204.1 MULTISPECIES:
succinyl-diaminopimelate desuccinylase [unclassified
Wolbachia]"
/cog="ArgE COG0624 409 Acetylornithine
deacetylase/Succinyl-diaminopimelate desuccinylase and
related deacylases"
/pfam="Peptidase_M28 Peptidase_M20 M20_dimer"
/tigr="TIGR01246 dapE_proteo 370 succinyl-diaminopimelate
desuccinylase"
/product="
succinyl-diaminopimelate desuccinylase"
/translation="MKIDPVELTRKLISFESITPEDSGAIEYIATIFKKSGFDCEILE
FGDKVKNLKYAKYINGVPNLCFAGHVDVPPGQLKDWAFGPFNPEVRDGMPLYGRGAADM
KSGVAAFIAMVNLI AEKFQFNGSISALITSAEESMEEYGTKAVLEWMKNKQKKIDFC
VVGEP TSSEKLGDTIKIGRRGSVTFELICHGKQGHVAYPDADNPIYKVISILSKVKN
TTFDHGNKYFQPSHCEVTTIDVGNNTSNLIPGSATTRFNIRYNNEQTPGGLYKLIDEI
CSSVTS DYKLSVHSSRDVFLSTPDRNTDIMLDAISKVTNIDAILSTSGGTSDAAFIKD
VCPVIEFGIINKTAHQINECVSVNDIHKLTAIYKEFIENYFNPTNKILNQVNVVRNIS
SGPLLA"
/besthit="qcoverage 100 , hcoverage 100 , similarity 100

```

```

, identity 100 , evalue 1.43e-289 , alnlength 398 ,
Bacteria , Proteobacteria , WP_015589204.1 MULTISPECIES:
succinyl-diaminopimelate desuccinylase [unclassified
Wolbachia]"
gene      complement(6020..6658)
          /locus_tag="wEsol_00652"
CDS       complement(6020..6658)
          /locus_tag="wEsol_00652"
          /codon_start=1
          /transl_table=11
          /fullproduct="qcoverage 100 , hcoverage 100 , similarity
100 , identity 100 , evalue 2.43e-149 , alnlength 212 ,
Bacteria , Proteobacteria , WP_006279797.1 MULTISPECIES:
endonuclease III [Wolbachia]"
          /cog="Nth COG0177 211 Predicted EndoIII-related
endonuclease"
          /pfam="HhH-GPD HHH Pfam-B_5204 EndIII_4Fe-2S"
          /tigr="TIGR01083 nth 192 endonuclease III"
          /product="endonuclease III"
          /translation="MDSKKVELIFEKFKQQSNPAPKIELNYTNHFTLLVAIVLSARTTD
VSVNKITRELFNIADTPEKMLSFGQSELKKCISSIGLYNSKAKNIIGLSKILVERYNS
KVPTNFDLVLPLGVGRKSANVFLNSGLGIPTLAVDTHVFRVSNRIGLVKEKDVFKE
QSLNINVVPKYYLLYAHHWLVLHGRYVCKAQKPSCECTCIHDLCEFECKRYKV"
          /besthit="qcoverage 100 , hcoverage 100 , similarity 100
, identity 100 , evalue 2.43e-149 , alnlength 212 ,
Bacteria , Proteobacteria , WP_006279797.1 MULTISPECIES:
endonuclease III [Wolbachia]"
gene      complement(6686..8122)
          /locus_tag="wEsol_00653"
CDS       complement(6686..8122)
          /locus_tag="wEsol_00653"
          /codon_start=1
          /transl_table=11
          /fullproduct="qcoverage 100 , hcoverage 100 , similarity
100 , identity 100 , evalue 0.0 , alnlength 478 ,
Bacteria , Proteobacteria , WP_141456998.1 MULTISPECIES:
isocitrate dehydrogenase [unclassified Wolbachia]"
          /cog="LeuB COG0473 348 Isocitrate/isopropylmalate
dehydrogenase"
          /pfam="Iso_dh"
          /tigr="TIGR02924 ICDH_alpha 473 isocitrate dehydrogenase"
          /product="isocitrate
dehydrogenase"
          /translation="MSTLITVAYGDGIGPEIMEAVLSILREAEAEISIDIIEIGERVY
SKEWSHGISPSPGWESIERTKILLKSPTTTPQGKGHKS LNVALRKNLGLYANIRPCISY
HPVIENKFDKFDIVVIRENEEDVYTGIEHRLTGDSYQCTKIITRSGSEKICRYAFEYA
KKHNRKKVTCLTKDNIMKMTDGTFHAAFDRIAKEYPDIKAEHYIVDIGMARVATEPEN
FDVIVTENLYGDILSDIVAQTSGSVGLAGSSNIGNEYAMFEAVHGSAPDIAGKNIANP
SGLLNAAVHMLIYIGQVGTAKLIYDAWLKTLEDGIHTADLYKEKRSKQKVGTKFEFAEA
VIDNLGKKPAELIIGSGSDSKINLDSKINKVQDNYEQDYKVKKLVGSDITLAWDKSSN
VDQIVGLFESSNLQMIAYISKGLAIWPGNSKPSDQITCRFIANNEKQAITNSDVNNL
LIKLEEHNFDDVVRMDKLYLYDGKEGFFV"
          /besthit="qcoverage 100 , hcoverage 100 , similarity 100
, identity 100 , evalue 0.0 , alnlength 478 , Bacteria ,
Proteobacteria , WP_141456998.1 MULTISPECIES: isocitrate
dehydrogenase [unclassified Wolbachia]"
gene      8268..8804
          /locus_tag="wEsol_00654"
CDS       8268..8804
          /locus_tag="wEsol_00654"

```

```

/codon_start=1
/transl_table=11
/fullproduct="qcoverage 100 , hcoverage 100 , similarity
100 , identity 100 , evalue 1.07e-99 , alnlength 178 ,
Bacteria , Proteobacteria , WP_006279799.1 MULTISPECIES:
RDD family protein [Wolbachia]"
/cog="COG1714 COG1714 172 Predicted membrane
protein/domain"
/pfam="RDD"
/product="RDD family
protein"
/translation="MNTEINVKVNYVGFTRRIVAEILDLIIFSPHFIFGFIYGVFIVS
LQDQDKDSFQELAQLATEIPFIVSTVVATLVLTISKILMVTKLGGTPGKLLCGMHKD
ANTFTNVTLMQATIRCISKGSIWIIFRFLHLHYHGYTFLYLLIVLILFLFAVFDQRK
QTFYDKIAKTVIDYKSS"
/besthit="qcoverage 100 , hcoverage 100 , similarity 100
, identity 100 , evalue 1.07e-99 , alnlength 178 ,
Bacteria , Proteobacteria , WP_006279799.1 MULTISPECIES:
RDD family protein [Wolbachia]"
gene 8827..9303
/locus_tag="wEsol_00655"
CDS 8827..9303
/locus_tag="wEsol_00655"
/codon_start=1
/transl_table=11
/fullproduct="qcoverage 100 , hcoverage 100 , similarity
100 , identity 100 , evalue 3.54e-102 , alnlength 158 ,
Bacteria , Proteobacteria , WP_006279800.1 MULTISPECIES:
RDD family protein [Wolbachia]"
/cog="COG1714 COG1714 172 Predicted membrane
protein/domain"
/pfam="RDD"
/product="RDD family
protein"
/translation="MDKKVNYSTMTRRTLAFIVDCILFIAIPFGLMAVGFSLTTHAIQG
IMGAIIVITITIVFSLFLMIPCIFHIFMLVKFGGTPGHLLFSMRVKDKDTFESITTMQA
MKRTIALFIIYCISLCNPILFLAILILVLVCAVGDEHKQAFHDKIANTVVIDYKPS"
/besthit="qcoverage 100 , hcoverage 100 , similarity 100
, identity 100 , evalue 3.54e-102 , alnlength 158 ,
Bacteria , Proteobacteria , WP_006279800.1 MULTISPECIES:
RDD family protein [Wolbachia]"
gene 3140..3212
/locus_tag="wEsol_tRNA-13"
tRNA 3140..3212
/locus_tag="wEsol_tRNA-13"
/gene="tRNA-Met"
/intronpos="0..0"
/program="tRNAscan-SE"
/cove_score="74.9"
/evidence=predicted
/type="Met"
/anticodon=CAT
/product="tRNA-Met (CAT)"

```

#### ORIGIN

```

1  gtgaatcttt atgaatttac ttttataaca caacaaggat tattacagca agaagtagag
61  gaaatggtcc aagagctagc tgttttcattg aaaaatatta aagcagatgt tatgttccag
121 caaatcaggg atattctgaa aaaaggaaat gacaagctta caacacaaga gttagaagtg
181 cgtgctgaaa acattaaaga aggtctagtt gcttactctg atttcttgga agatcttaca
241 aaaattttat gggttgaatt ggaagaagat ctttcaaatt tgaaagaagt gaagtcaaaa
301 atcgataaag agttgaaaga tgacctaaaa gatttaggaa taacgcaaga ttttacaaaa

```

|      |             |             |             |             |             |             |
|------|-------------|-------------|-------------|-------------|-------------|-------------|
| 361  | tttctaggag  | gcagtactaa  | aagtgcgttt  | atccataacg  | cagtaaatgc  | tttgaagaga  |
| 421  | aatattttcag | aacatctaata | aaagattttt  | caagataattt | tgaaagattt  | tagaataaac  |
| 481  | ggccaactc   | aatcgagcaa  | agcgttggaa  | atgcttttga  | aaaacattga  | agcatcagga  |
| 541  | ttaatcaagt  | atgaacattg  | gggtcttttg  | gattttgcat  | atcacaaaaa  | taaaatgaag  |
| 601  | agcggtcatt  | attgtataat  | gtgcataagt  | tctactgcaa  | gcattctgga  | tgaatttatg  |
| 661  | cgtagaatga  | aacttaatga  | gaacgttatt  | cgccactttc  | ctgtgcagggt | tgataaaaatt |
| 721  | tttgaaggta  | aatctcatat  | gatgaataaa  | caaattgagg  | agcaaagcgc  | ataatgatga  |
| 781  | aaagacgaaa  | tagttttaat  | aattctttacg | tatctgtaaa  | taataggact  | ggcttttaggc |
| 841  | gttctaaagt  | ttgccctctt  | gctgcgtcta  | aagatgaaga  | catagattat  | aagaatatag  |
| 901  | atattattatc | caagtttacc  | tctgactatg  | gtaggatatt  | acctagaaga  | ttaacaggcg  |
| 961  | tatgtgcaaa  | aaaacaaagg  | aagttacgct  | tagcgatcat  | aagggcacgt  | tttttagctc  |
| 1021 | ttattcctta  | ctgtactaaa  | aaagtttagg  | taatttatgt  | tgataatttt  | aaaggaaaat  |
| 1081 | ataaggactt  | taggtaagct  | tggtgaagtt  | gtcaaagtta  | aaccagggtta | tgcacgtaat  |
| 1141 | tttctttttc  | cacaaagaaa  | agcggtgaaa  | gctaccaagg  | aaaatttaac  | aaagctagag  |
| 1201 | gagcaacgtt  | tattactgga  | agaagagaat  | ataaaaagat  | taaatgtagc  | aaaagagctt  |
| 1261 | gcattgtcac  | tacatgataa  | gtttgtggta  | ttgataaagc  | aagcttcaga  | ggatggtaaa  |
| 1321 | atttttgggt  | ctgtaacaac  | acgtgaaatt  | gcgaaaattt  | tactacaaga  | aggacatgtg  |
| 1381 | atagaccacc  | gtagtttatc  | ttttgggtgga | gtaagcatca  | aaaacttggg  | tgaataccaa  |
| 1441 | gtaaacgtag  | aattacatag  | tgaagtagta  | gtaccaatta  | ctatatacgt  | cgtgaaatcc  |
| 1501 | gaaacagatg  | caaatgagct  | aaggcaagta  | aaattgcaaa  | atcagaagtc  | tgagcaacaa  |
| 1561 | gaggcagagc  | aagatgcgaa  | taaagaagct  | gctgatgggtg | atgatagctg  | atcaaagatg  |
| 1621 | atcccttggt  | atagccgaaa  | agaaatgtct  | gccatggcta  | agctgggtgc  | atcccagtcg  |
| 1681 | ttccctcatg  | tcattcccagt | gcgtgacact  | gggatccagt  | ttatttcac   | atggacatta  |
| 1741 | ttttatgctt  | ctagaatccg  | ttgtccattg  | aataatttgc  | aaatactttt  | atacctggat  |
| 1801 | tccagtgtca  | cgcactggaa  | tgacaccatt  | attggaataa  | atcaaaaatg  | attccccgct  |
| 1861 | atagcagaaa  | agaaatgtct  | tccatttggg  | aggaaaataa  | taaatttaat  | atatggctta  |
| 1921 | aaatagaaaa  | attagcgtgt  | gaagctcaag  | caaagttagg  | agtgattccg  | aataatattg  |
| 1981 | ctgagaacct  | ctctgggtgct | attgaatttg  | atgttgaatg  | tatcaacgaa  | attgaatcca  |
| 2041 | ttgtaaaaaca | tgatgttata  | gcttttctga  | catataattgc | taaaaaagcg  | ggagttgatg  |
| 2101 | ttcgttatct  | tcattatgga  | atgacaagtt  | ctgatgtttt  | ggatacatgc  | cttgcggtgc  |
| 2161 | aactgaaaga  | gtcctgtgat  | attttgctcg  | agaatctaaa  | aaatttactt  | gcagcattga  |
| 2221 | aaaaaaaaagc | tgaggactat  | aaagatattg  | tttgtgttgg  | acgcagtcac  | ggaatgcatg  |
| 2281 | cagaaccaac  | aactcttgga  | ataaaaattt  | ccagatttta  | tgctgaattt  | aaacgcaatt  |
| 2341 | atcagagatt  | aattagcgcg  | caaaaagaga  | tctcaatttg  | taaaatatca  | ggtgcagtag  |
| 2401 | gcaattttgc  | aaatgttgat  | ccgtttgttg  | agaatatgt   | agcgaaagaa  | ataggactca  |
| 2461 | tacctgaaat  | catatcgtct  | caagtcattc  | ctcgtgatag  | acatgctatg  | ttcttttcag  |
| 2521 | ttttgggagt  | gattgcaagc  | tcaatagaaa  | atgttgctgt  | tgaaattcgt  | catttgcaaa  |
| 2581 | gaactgaaat  | cggcgaaaatt | tctgagcatt  | tttccacggg  | gcagaaggga  | agctctgcta  |
| 2641 | tgccacacaa  | atgtaatcct  | attttaagt   | aaaatctgac  | tggaactctca | cgtttaatac  |
| 2701 | gcagttatgt  | ttttcctgcg  | ttagaaaatg  | ttgcattgtg  | gcacgaacgt  | gatatatcac  |
| 2761 | actcgtctgt  | ggaaagatgc  | attgctcctg  | atgcttgat   | aacaatggat  | tttgctttag  |
| 2821 | tgcgattaac  | agatttgata  | gataaattgg  | tgatcaataa  | ggaaaacatt  | gaaaagaact  |
| 2881 | taaattcttc  | aaaaggttta  | gttttctcac  | agcgtgtatt  | gcttgagtta  | gtaaaatagtg |
| 2941 | gtttggcgag  | ggaagaggcg  | tataaaaattg | ttcagagcaa  | tgcaatgaaa  | gtgaaacaaa  |
| 3001 | acaacagtga  | ttttctggcc  | gaattgaaac  | aagataaacc  | cttacttaag  | gttattaact  |
| 3061 | cggaaaaaact | tgaatctttg  | tttgatttga  | agtattatac  | gaaacatata  | gatcgtgtgt  |
| 3121 | ataataaggt  | ttttaattag  | gctgagtagc  | tcagttggta  | gagcaggagg  | atcataatct  |
| 3181 | cttggctcggg | ggttcaagtc  | cctcctcagc  | cactcgaact  | aaactatgtt  | tagcaaagca  |
| 3241 | gtgctactgg  | tgaaaccag   | tgtcagttac  | ttggaatgag  | ttgtatatcc  | actcagggtga |
| 3301 | ggagacaatg  | gataagagat  | tgtgaaaagg  | gttttagctt  | tggcctatga  | tctctttaa   |
| 3361 | tgacagaatt  | tcactacaaa  | acttaacttt  | cttctatgca  | gttagctaag  | tcaagaaagg  |
| 3421 | tgaatctatc  | tcttgttgta  | aacgcaagat  | cgaccacttt  | acaatattgt  | tctttattcc  |
| 3481 | aactgagggtg | ctctggtaag  | tgtggaattg  | atagatcttc  | aaatatTTTT  | tgcagggtgtt |
| 3541 | ttgcaggtag  | taaattttgc  | ttaatataaac | tggaatatatt | atgccattct  | ttacaaataa  |
| 3601 | tctcttggt   | tttttgctgc  | ataatttgct  | tctgttcaaa  | agttcttaca  | aattcgatat  |
| 3661 | tatcaaagca  | ctgagttata  | tgttctacat  | ctaaagtgg   | cggtttgata  | atcgggtttt  |
| 3721 | gtattgataa  | tatcttttcc  | tgcaaattag  | ccatggtaat  | cgtcgtgaaca | gcaatttttt  |
| 3781 | cgccatgtag  | taaggaatga  | tctcttggtta | ccatttccat  | tgctgtagct  | atcatatgct  |
| 3841 | ctccttggt   | tgcagaatag  | ctgccttttg  | atattacat   | tccaagtcct  | gaaattagta  |
| 3901 | gaacttccat  | aagtaatagg  | accacttttc  | tacttctttt  | agtaagcgcc  | gtatactctc  |

|      |             |             |             |             |             |            |
|------|-------------|-------------|-------------|-------------|-------------|------------|
| 3961 | ttagcaaaat  | ttgctccaaa  | tgcgcaacaa  | gtgtaaaagg  | taattcattg  | tattctgtgc |
| 4021 | caagcaacaa  | atgagatagt  | agccagtcag  | cctgaactgt  | tgaacgacaa  | atgaaatctg |
| 4081 | caaatccgct  | taatgtgaga  | cgcagtggtg  | cattggcaag  | tatgtctata  | tctatatata |
| 4141 | ctgctcttgg  | aagatgtgct  | ttgaacgatt  | ttttatatcc  | atttactaat  | attgaagcat |
| 4201 | ttgcagaggt  | atatccattc  | atagaagcgg  | ctgttgggaa  | cgatatataa  | tcttttttct |
| 4261 | cgaggtagct  | tgcataattg  | cagatatcgt  | taacagtgcc  | gctaccaa    | gcaactatta |
| 4321 | agtcactgtc  | ttttgctttg  | tttctaacta  | gatttacagt  | ttcaagagag  | gcagctctgc |
| 4381 | ttggtgtcat  | gcaagtagct  | gacactggga  | tccaggaaaa  | caacttatgg  | attccagtgt |
| 4441 | cacgcgctgg  | aatgacaggt  | ggagctggaa  | taattaagtt  | aggaatttta  | ttaagtacgt |
| 4501 | ttttgtttaa  | aagttttgct  | gtatTTTTt   | ctgcaactag  | aaagacgtca  | tttccgtgtc |
| 4561 | gtgtgcatat  | ttcatagata  | tcatcagcaa  | ggtagtaatc  | tgttattact  | tcccttagaa |
| 4621 | aagtttgttc  | ggtttgatgt  | aatatTTgtt  | ttaaatagtg  | catagagtgt  | ttacaatata |
| 4681 | gcagtataag  | tattttaaga  | ttgacatgaa  | aattgaccct  | gtagagctaa  | ctaggaaatt |
| 4741 | gatctctttt  | gagagtataa  | caccagaaga  | cagcggggca  | atagagtata  | tagcaacaat |
| 4801 | cttcaagaag  | agcggctttg  | attgtgagat  | tttagaattt  | ggtgataaag  | ttaaaaatct |
| 4861 | ttatgcgaaa  | tatataaatg  | gagtaccaa   | tttgtgcttt  | gctgggcacg  | ttgatgttgt |
| 4921 | accaccgggt  | cagttaaaag  | attgggcatt  | tggtccattt  | aatccagaag  | tgagggatgg |
| 4981 | aatgctatat  | ggaagagggg  | ccgctgatat  | gaaaagcggg  | gtagctgcat  | ttattgctgc |
| 5041 | tatggtaaat  | ttgattgcag  | agaagtttca  | atttaaatgg  | tcgataagtg  | cattgattac |
| 5101 | cagtgtctgaa | gaaagcatgg  | aagaatatgg  | aacaaaggca  | gttttggaat  | ggatgaaaaa |
| 5161 | taagcagaaa  | aagatagatt  | tttgtgtggt  | tggcgaacca  | accagtagtg  | agaaattagg |
| 5221 | tgataccata  | aaaataggca  | gaagaggttc  | tgtaacattt  | gaattaattt  | gccatggaaa |
| 5281 | acaagggcac  | gttgccctacc | cagacctagc  | agacaatcca  | atatataagg  | taatatcgat |
| 5341 | attgagtaag  | gtaaaaaata  | ctacttttga  | tcatggtaat  | aaatatTTtc  | agccttcaca |
| 5401 | ttgcgaagtt  | actactatcg  | atgTTggaaa  | taatactagc  | aatctaatac  | ctggctcagc |
| 5461 | aactacacgt  | tttaacattc  | gatataacaa  | tgaacaaaca  | ccgggtggct  | tatataagct |
| 5521 | gattgatgaa  | atatgctcca  | gtgtaactag  | cgattataaa  | ctttctgtgc  | atagcagcag |
| 5581 | ggacgttttc  | ctctctactc  | ccgatagaaa  | tactgatatt  | atgcttgatg  | caataagtaa |
| 5641 | ggttaccac   | attgatgcta  | tacttagcac  | aagtgggtgg  | acatctgacg  | ctgcgtttat |
| 5701 | caaagatggt  | tgtccagtg   | ttgaatttgg  | tataatcaac  | aaaaccgcac  | atcagataaa |
| 5761 | cgaatgcgta  | tcagtaaacg  | atatacacaa  | gttaacagct  | atatataagg  | aatttataga |
| 5821 | aaattatttc  | aatcccacta  | ataaaatatt  | gaatcaggct  | aacgtgggta  | ggaatatatc |
| 5881 | tagtgggtcca | ttgttagctt  | agatgtaatc  | agatctcttg  | cataactggt  | gtctgaataa |
| 5941 | caactgggtg  | cattccagca  | aaatgtgtca  | agtaagtttt  | ttcgttttcta | tagctacttg |
| 6001 | gatgacaaaa  | gaagaaatac  | tagacttttat | accttttgca  | ctcaaattca  | cataaatcat |
| 6061 | gaattatgca  | cgtttcacac  | gaaggtttct  | gtgctttgca  | aacatatcta  | ccatgcaaaa |
| 6121 | ctagccaatg  | atgagcataa  | agcaggtatt  | ttttgggaac  | cacatttaaa  | agagattgct |
| 6181 | ctgtttttaa  | cacatctttt  | tctttcacaa  | gcccgaattct | attgctcact  | ctaaaaacgt |
| 6241 | gagtatcaac  | tgccaatggt  | ggaatgccaa  | gccccgaatt  | taagaacaca  | ttagcgctct |
| 6301 | ttctccccac  | tccaggcaaa  | gacaccaa    | catcaaaatt  | agtaggtact  | ttgctgttgt |
| 6361 | atcgttctac  | caatatTTta  | ctaagcccga  | ttatatTTtt  | tgctttggaa  | ttatataaac |
| 6421 | caatactgct  | tatgcatttt  | ttcagctcac  | tctgccccaa  | gctcagcatt  | ttttctggcg |
| 6481 | tatcagcgat  | attaaatagt  | tctcttgtaa  | ttttattaac  | gcttacatca  | gttgtccgcg |
| 6541 | ctgataaaac  | tatcgcaaac  | agtaacgtaa  | aatgattgg   | ataatttagc  | tctatTTttg |
| 6601 | gcgcaggatt  | tgattgttga  | aacttttcaa  | atattagttc  | tactTTTTtt  | gagtccatct |
| 6661 | catttaccac  | acctctTTta  | aatatTTtaa  | caaagaacct  | ctctttccca  | tcatacaaat |
| 6721 | acaatttgtc  | cattctcacc  | acgtcaaaat  | tgtgttcttc  | gagtttgatt  | agcaagttat |
| 6781 | ttacatcact  | atttgtaata  | gcttgctttt  | cattatTTtg  | gataaaccta  | caggttatTT |
| 6841 | ggtcacttga  | aggTTTTgag  | tttcttggtc  | aaatcgcaag  | tcctTTtgag  | tatattgcta |
| 6901 | tcatttgcag  | attacttgat  | tcaaataatc  | ctactatTTg  | atcaacatta  | ctggatttgt |
| 6961 | cccaagcgag  | agttatatca  | ctaccacta   | gctTTTTaac  | tttgtaatct  | tgttcgtaat |
| 7021 | tgtcttgtac  | tttatTTtatt | ttactatcca  | aatttatTTt  | actatccgaa  | ccactgccaa |
| 7081 | ttataagctc  | agcaggtTTt  | tttcttaaat  | tatctataac  | agcttctgca  | aattctTTtg |
| 7141 | taccaacttt  | ctgTTttact  | cttttctcct  | tatataaaatc | ggcagtggtg  | attccatcct |
| 7201 | ccaaagtctt  | gagccatgca  | tcgtagatta  | gttttgagct  | accacttga   | cctatgtaaa |
| 7261 | ttagcatatg  | cactgcagca  | tttaaaagac  | cagaaggatt  | ggctatgttt  | tttctgcaa  |
| 7321 | tatcaggggc  | agaaccgtgc  | actgcttcaa  | acattgcgta  | ttcattcccc  | atgttgctac |
| 7381 | ttccggcaag  | ccccacagat  | ccagaggttt  | gtgcgactat  | atctgataat  | atgtcgccat |
| 7441 | ataagtTctc  | ggttactata  | acatcaaaat  | tctccggttc  | tgttgcaaca  | cgcgccattc |
| 7501 | caatatcaac  | tatataatgt  | tctgccttta  | tatctgggta  | ttcctttgca  | atgcgatcaa |

```

7561 acgcggcatg gaaagttccg tcagtcattt tcatgatggt atcttttagtc aggcaagtta
7621 ctttttttct gttgtgtttt tttgcatatt caaaagcgta cctgcatatc ttctctgagc
7681 cagatctagt aataatttta gtgcattggt aagagtcacc agtgagccta tgctctattc
7741 cgggtgtaaac gtcctcttca ttttcacgta tctactacgat atcaaactta tcgaatttat
7801 tttctataac aggatgatat gaaatgcatg gtctgatatt tgcatacaac cctagatttt
7861 ttctgagtgc aacgtttaag cttttgtgcc ctttaccttg aggagttggt gtcggagatt
7921 ttaataatat ttttgtcctt tcaattgatt cccaaccact tggagaaatt ccgtgagacc
7981 attctttact gtaaacacgc tcccctattt caataatatc tattgagatt tccgcttctg
8041 cttcgcgcaa tatcgacagc accgcttcca tgatttctgg tccgataccg tcgccatatg
8101 caactgtgat tagtgttgac ataacttccc tagttataaa tgatttaata ttaatttaaa
8161 taatagagtg gcacaagtag ctaatattac ccaagttagt atattttacgg ttatttaata
8221 acgtattttt atatcatatg atgatattat gaaatatagg tgggggttatg aatactgaaa
8281 taaatgttaa agtaaattat gtaggattta caaggcgtat tgtagcagaa atacttgacc
8341 tcatcatatt ttccctcat tttatcttcg gttttatcta tgggtgtattc atcgatcat
8401 tacaagatca agataaagac tcttttcagg aacttgaca actagcaaca gaaataccat
8461 ttatagtttc tacagtggtc gcaacattag tactaacaat atccaaaata ttaatggtaa
8521 caaaacttgg tgggtaccca ggaaaactat tgtgtggtat gcatattaaa gatgctaata
8581 catttaca aa tgttaccctt atgcaagcaa caataagatg tatttctaag ggaagcatct
8641 ggattatttt tcgctttttg cttcatctgc attatcatgg ttatactttt ctatatcttt
8701 taattgtgct aattttattt ttgtttgtag tatttgatca acgcaaacag actttttacg
8761 ataaaattgc aaaaacagta gtgatagact ataaatctag ttgatatttt tctttatagg
8821 tagtacatgg ataaaaaagt aaactactca acgatgacaa gacgtactct agcatttata
8881 gttgattgta ttttatttat cgcaatacca tttgggttaa tggcggtggg tttctcactt
8941 acacacgcaa tacaagggat catgggtgca ataattgtaa tcaccacgat tgtattttct
9001 ttatttttaa tgataccatg tatatttcat atattcatgc tagtaaaatt tggcggcact
9061 ccaggacact tgttatttag catgctgtga aaagacaaag atacatttga gtcaatcact
9121 acaatgcaag caatgaaaag gactatagct ctttttataa tttattgcat atcactttgt
9181 aatcccatth tattcttagc tatactaata ttagtttttag tatgtgcagt aggtgatgaa
9241 cataaacaag cttttcacga caaaattgca aacacggtag tgatagatta taaacctagt
9301 tgatattttc ctttagctgt ctgccaccaa ggggtgtcatt ccagtgtcac gcgctaactt
9361 aaggtaaatt gccaaactta ctataaatat attttggtta atccaaatta ttttagctat
9421 aagagcgtht tactttttgc tcagcatat

```

//

```

LOCUS      JAQZAU010000060          5710 bp    dna        linear    ENV 17-MAR-2023
DEFINITION MAG: Wolbachia pipientis isolate wEsol contig_36686, whole genome
            shotgun sequence.
ACCESSION  JAQZAU010000060  JAQZAU010000000
VERSION    JAQZAU010000060.1
DBLINK     BioProject: PRJNA929258
            BioSample: SAMN33142973
KEYWORDS   WGS; ENV; Metagenome Assembled Genome; MAG.
SOURCE     Wolbachia pipientis (insect metagenome)
ORGANISM   Wolbachia pipientis
            Bacteria; Pseudomonadota; Alphaproteobacteria; Rickettsiales;
            Anaplasmataceae; Wolbachieae; Wolbachia.
REFERENCE  1  (bases 1 to 5710)
AUTHORS    Fiutek,N., Couger,B.M., Roy,S., de la Torre,J.R. and Connor,E.F.
TITLE      Genomic assessment of the contribution of the Wolbachia
            endosymbiont of Eurosta solidaginis to gall-induction
JOURNAL    International Journal Molecular Sciences
REFERENCE  2  (bases 1 to 5710)
AUTHORS    Fiutek,N., Couger,B.M., Roy,S., de la Torre,J.R. and Connor,E.F.
TITLE      Direct Submission
JOURNAL    Submitted (10-FEB-2023) Biology, San Francisco State University,
            1600 Holloway Ave, San Francisco, CA 94132, USA
COMMENT    ##Genome-Assembly-Data-START##
            Assembly Date      :: JUN-2019
            Assembly Method    :: FLYE v. 06-2019
            Genome Representation :: Full
            Expected Final Version :: Yes

```

Genome Coverage :: 100.0x  
Sequencing Technology :: Illumina HiSeq; PacBio Sequel  
##Genome-Assembly-Data-END##

FEATURES  
source  
1..5710  
/organism="Wolbachia pipientis"  
/mol\_type="genomic DNA"  
/submitter\_seqid="contig\_36686"  
/isolate="wEsol"  
/isolation\_source="galls on Solidago altissima"  
/host="Eurosta solidaginis MN-2018-EFC"  
/db\_xref="taxon:955"  
/environmental\_sample  
/country="USA: Cowling Arboretum, Carleton College,  
Northfield, MN"  
/lat\_lon="44.48 N 93.13 W"  
/altitude="280 m"  
/collection\_date="2018-11"  
/metagenome\_source="insect metagenome"  
/note="metagenomic"  
gene  
complement(<1..986)  
/locus\_tag="wEsol\_00656"  
CDS  
complement(<1..986)  
/locus\_tag="wEsol\_00656"  
/codon\_start=1  
/transl\_table=11  
/fullproduct="qcoverage 100 , hcoverage 84.7545219638243  
, similarity 100 , identity 99.7 , evalue 6.76e-219 ,  
alnlength 328 , Bacteria , Proteobacteria ,  
WP\_006279533.1 MULTISPECIES: multidrug effflux MFS  
transporter [Wolbachia]"  
/pfam="MFS\_1 MFS\_2 Pfam-B\_3877 MFS\_3 Sugar\_tr TRI12  
MFS\_2"  
/tigr="TIGR00710 efflux\_Bcr\_CflA 385 drug resistance  
transporter, Bcr/CflA subfamily"  
/product="multidrug effflux  
MFS transporter"  
/translation="MILSVAIVDMATDLYSVALPSIANYFKVEGSVVQLTISLNLVGF  
AVSGLIYGPLSDHYGRRPMLIGMTIFTLASVMCYIADSIALLILIRFIQGTGAGVAG  
VVGYSAIRDMYSGSEYSRVISKLNMMVVALSPGIAPVVGSIISHGYSWKFLFFIISLA  
AIAILIFIYFKLQETLTVNKNETSITNITNICKQYISIFRNYRFLGFSAIHGLTFMW  
LWAYIANYPFIFESMGIEVQYFGYLISIIIVIFYIIGTLINRRYVPKVGVS KM LIIGLV  
LPIISDSSLVYFYFADKLNILILQTVWIPANIGLALIISNNVTSALETIKGI"  
/besthit="qcoverage 100 , hcoverage 84.7545219638243 ,  
similarity 100 , identity 99.7 , evalue 6.76e-219 ,  
alnlength 328 , Bacteria , Proteobacteria ,  
WP\_006279533.1 MULTISPECIES: multidrug effflux MFS  
transporter [Wolbachia]"  
gene  
complement(1172..2038)  
/locus\_tag="wEsol\_00657"  
CDS  
complement(1172..2038)  
/locus\_tag="wEsol\_00657"  
/codon\_start=1  
/transl\_table=11  
/fullproduct="qcoverage 100 , hcoverage 100 , similarity  
100 , identity 100 , evalue 5.82e-213 , alnlength 288 ,  
Bacteria , Proteobacteria , WP\_015589080.1 MULTISPECIES:  
hypothetical protein [unclassified Wolbachia]"  
/translation="MSKEMVNALKAEVKKLKYADFKANTWDEVISGEGTYKDLNRTHG  
LAINGQKITNEFINNLYSNHKNLILRDENGKGNYPFLRQIFTEMFKHVGATIPNNSI

```

IEELINNYQGGYTHFLPNDMNQALGSFHLSTQGNCMTREYIMDCREPNCIKLSFSMK
YTKMLNYDDCTYIETPGFCSSAEFKLKCKDENVTYEDGKVLLTIPKELEDYKAGDDGL
FDKLTYYIINKLIEYFKKLCEKLGFEFDTRIEYDPERNIKIEHNLGEPLKVVSEANASS
VEDLKLKVNQR"
/product="hypothetical protein"
/besthit="qcoverage 100 , hcoverage 100 , similarity 100
, identity 100 , eval 5.82e-213 , alnlength 288 ,
Bacteria , Proteobacteria , WP_015589080.1 MULTISPECIES:
hypothetical protein [unclassified Wolbachia]"
gene complement(2096..4177)
/locus_tag="wEsol_00658"
CDS complement(2096..4177)
/locus_tag="wEsol_00658"
/codon_start=1
/transl_table=11
/product="hypothetical protein"
/pfam="GTA_TIM Pfam-B_29 Phage-tail_3 Pfam-B_29"
/translation="MVLNFAQLTKIRDEQGNYPVIELVKLAKRIKLNLGKEVTVTYA
ADWSEYHSYDGWYNMDELWSSEYIDVVGIDAYFPLTDGPEPPFGYSAEDVMGGWSSGV
GYDYFYDYSESEKVKYNDSTRYAWKNIEKWWSETHINPGGSKTKWQPKMKKIWFTEY
GFPSMNGCTNEPNVFDKGSIESKYPRYSNGEVSFSLQKIAIEGTLKKWQSSEMVEKM
FLAWDARPFYPFNLCDMWTDCNHWQGTGHWIQGKLSQLNISDVLSDLLQKTGLKSDQ
FDASNVKGLLSGYVINDQQSVRSIIKMLQSCYFFDVVEQDSKLKFVQKGRGVTTGIPI
GEMVFSNNSKLANISQLDLNNKVNVDYFNRNFGYPIDVKYAEKPKQGAATVEIPLIM
EEGEAQNIAEVLLYSSWQERNIYNFKLPIKYAWLVPDVTITLDGEKKHTVRIIKTKF
ESMSIQAGVGYDHSIYKLSFPSTRSLMLKEYPPSHISKTIIVEMIDLPIKGNASFT
LISEEKNWKGATLFIYNDKDYKPIASTNKQSTYGYVMESTDEGLIVVLRFGILSSSY
NHYLSGDVIPALDYISPGSQCLGTGMTTEEGFTSTNVSTINVSNLALVGKEVIKFSAE
LIDKNKYKLSNLRGQEGTKEYQHTTGEKFVLLDDSIISFEVQPGKRLFLKAVTYGDS
LDNTEAKVLSN"
/besthit="qcoverage 99.4227994227994 , hcoverage
62.1841155234657 , similarity 99.9 , identity 99.9 ,
eval 0.0 , alnlength 689 , Bacteria , Proteobacteria ,
WP_174516821.1 glycoside hydrolase TIM-barrel-like
domain-containing protein [Wolbachia endosymbiont of
Cardiocondyla obscurior]"
gene complement(4137..5423)
/locus_tag="wEsol_00659"
CDS complement(4137..5423)
/locus_tag="wEsol_00659"
/codon_start=1
/transl_table=11
/product="hypothetical protein"
/pfam="Pfam-B_29 Pfam-B_29 GTA_TIM"
/translation="MSTIILSSIFGQAGSIFGPIGRIIGSELGALLGAQLDGAMFGLE
AEQKVTHGARLKNLQVQTSTYGRTPIIYGTARVAGNIIWAQPIKEEAITTKSKIGRG
MNVTYNYATLAIAICKGKVEKLNRIWADTTSLSFDEIDYTFYSGREDQNPDPFMSSI
EGEGNVPAYRGISYIVIKNFPLADYNNHVPVFTFEVQTAVKSNEFSVAKNIRNINIIP
GSGEFVYDTKIQQKIAQEKISSNQYIPYGLAQRVNHNHNTKKS DAMLSLDQLKEDLPN
VELVSVVWNWFVNNLNKIDCKIYPAVEFQDDSAILPDDWQVGGVTRDNAQLISKDASG
NPRYGGTVSDAALTRYIEELHSRGYKVMLYPMPLDTPKNKEWRGRLSGAPEDISDFFK
NQYNKFIEHYASIAKQTKVEGFIIIGSELCATYQNQR"
/besthit="qcoverage 97.8971962616822 , hcoverage
37.8158844765343 , similarity 100 , identity 100 , eval
6.45e-295 , alnlength 419 , Bacteria , Proteobacteria ,
WP_141456988.1 glycoside hydrolase TIM-barrel-like
domain-containing protein [Wolbachia endosymbiont of
Carposina sasakii]"

```

ORIGIN

1 cctatacctt tgatcgtttc taaagcagaa gttacgttat tgcttattat taatgcaagt

|      |             |             |             |             |             |             |
|------|-------------|-------------|-------------|-------------|-------------|-------------|
| 61   | ccgatattgg  | ctggaatcca  | aacagtttga  | agaattaata  | tattttaactt | gtccgcgaaa  |
| 121  | taaaaaatata | ccaataaaact | atcgggatatt | atcggtaaca  | ccaaacctat  | tatttagcatt |
| 181  | ttgctaacc   | ctacttttgg  | tacatacctt  | ctattaatta  | aagttccaat  | tatgtaaaat  |
| 241  | atgactatga  | tcgatatgag  | gtagccaaaa  | tactgtactt  | caatgcccac  | cgattcaaat  |
| 301  | atgaaaggg   | agtttagcaat | gtatgcccc   | agccacatga  | aagttaatcc  | atgaatggct  |
| 361  | gaaaacccaa  | ggaaacgata  | atttctaaat  | attgatatat  | attgcttgca  | gatattagta  |
| 421  | gttatgttag  | ttatactgg   | ttcattttt   | tttacagtga  | gtgtttcttg  | taacttaaag  |
| 481  | tagataaaaa  | taagtatagc  | aattgctgca  | agtgatataa  | taaaaaacaa  | aaatttccaa  |
| 541  | ctatacccat  | gtgaaattat  | ataactgccc  | accactggag  | ctattccagg  | tgagagtgcc  |
| 601  | acaaccatat  | ttaatTTTga  | aatgactctc  | gagtattcac  | taccgagta   | catatccctt  |
| 661  | attgctgaat  | acccaacaac  | acctgcaaca  | ccagcccctg  | ttccttgat   | gaagcgaatt  |
| 721  | agtatcaaga  | gcgcaatact  | gtcggctata  | taacacatga  | cacttgccaa  | agtaaaaatt  |
| 781  | gtcataccaa  | tcagcatcat  | tggacgccta  | ccataatgg   | ccgataatgg  | accataaatt  |
| 841  | aagccagata  | ctgcaaattc  | aactagattc  | aagctaattg  | taagctgcac  | tacactgcct  |
| 901  | tctactttta  | aataattggc  | aatgcttggt  | agtgcaactg  | agtataggct  | agttgccata  |
| 961  | tcgacaattg  | ctacagacaa  | tatcataata  | agagagatga  | tattttgcgg  | aagagctggt  |
| 1021 | ttcacttaat  | gatttactgg  | attaaatata  | cttaattata  | atgtattttt  | ttcattagta  |
| 1081 | taagtacaat  | gttacatagt  | aaacgatgtc  | attcgagtag  | cggacactga  | aatcttaagc  |
| 1141 | taaaatcatg  | aaaagcctga  | atttcaatac  | cttatctttg  | attattcact  | ttaagcttta  |
| 1201 | agtcttcaac  | agaagatgca  | tttgccctcac | ttactacctt  | tagtggttca  | ccaagattat  |
| 1261 | gctctatttt  | tatattacgc  | tcaggatcgt  | actctattct  | tgtatcaaac  | tcaaagccca  |
| 1321 | atttctcaca  | aagttttttg  | aaatactcaa  | taagcttatt  | tataatataa  | gtaagcttat  |
| 1381 | caaacaaacc  | gtcatcacca  | gctttatagt  | cctctaactc  | tttaggaatg  | gtaagcaata  |
| 1441 | ccttaccgtc  | ttcatacgtc  | acattttcat  | ccttacattt  | cagcttaaac  | tccgctgaac  |
| 1501 | tgcaaaaacc  | tggtgtttcg  | atatatgtac  | aatcatcata  | gttaagcatt  | tttgtatatt  |
| 1561 | tcagtctaaa  | actaagcttt  | atacaattgg  | gttcacgaca  | atccataata  | tactctcttg  |
| 1621 | tcatacagtt  | gccttgcggt  | gacaaatgaa  | aagatccaag  | agcttgattc  | atatcattag  |
| 1681 | gaagaaaatg  | agtatatccg  | ccctgataat  | agttatttat  | taactcctca  | ataatagagt  |
| 1741 | tattgggaat  | tggtgcacca  | acgtgtttta  | acatttctgt  | aaaaatttgt  | ctgagaaatg  |
| 1801 | gacgataatt  | cccttttccg  | ttttcatccc  | gtagaattag  | atttttatgg  | tttgaataca  |
| 1861 | gattgttaat  | aaattcggtta | gttatttttt  | gtccgttaat  | agcaaggccg  | tgtgttctat  |
| 1921 | taagatcctt  | atatgttccc  | tcaccagaaa  | ttacttcgtc  | ccaagtgtta  | gctttgaaat  |
| 1981 | cagcatattt  | gagcttcttc  | acttcagctt  | tcaacgcatt  | gaccatttcc  | tttgacatgt  |
| 2041 | tatatctcta  | ccattaatac  | ctgtatatata | atttttagcac | ttactttatt  | aaatttcaat  |
| 2101 | tactcaagac  | cttcgcttcc  | gtattatcca  | atgaatcacc  | ataagtcact  | gctttaagga  |
| 2161 | aaagtcgttt  | tcctgggttg  | acttcaaaaag | atattattga  | atcatcaagt  | agaacaaaatt |
| 2221 | tttcacctgt  | ggtgtgctga  | tactcttttg  | tgccctcttg  | ccctctaatt  | agggttgctaa |
| 2281 | gcttatattt  | atttttatct  | attagttcag  | cactctggaa  | ctttatcacc  | tcttttccaa  |
| 2341 | ccagtgtctaa | attgcttaca  | tttatagtac  | taacgttagt  | gcttgtaaaa  | ccctcttccg  |
| 2401 | tcatcccagt  | gcccagacac  | tgggatccag  | gagaaatata  | gtcaagcgct  | gggatgacac  |
| 2461 | catcacttaa  | ataatgggtta | tatgaagaac  | tcaatatacc  | aaaacgtagc  | actactataa  |
| 2521 | gcccctcgct  | ggtagattcc  | attacatatc  | cgtaagtaga  | ctgcttggtt  | gtgcttgcaa  |
| 2581 | taggcttata  | atccttatcg  | ttgtacgaaa  | taaagagtgt  | tgctcccttc  | caattctttt  |
| 2641 | cctcactaat  | taaagtaaag  | cttgcaactat | tacctttaat  | atccggtaaa  | tctatcattt  |
| 2701 | ctacgatgg   | tttgctgata  | tgagagggag  | ggtattcctt  | cagcataagt  | gacctgtgtg  |
| 2761 | aaggaaaaga  | aagcttatat  | atagagtgat  | cataaccaac  | gccaatgtgt  | tgaatggaca  |
| 2821 | tgctttcgaa  | ttttgttttt  | ataattctca  | ccgtatgctt  | tttctcaccc  | tctaaaatcg  |
| 2881 | ttattacatc  | acttggcaca  | agccacgcac  | attttatcgg  | cagcttgaaa  | ttgtatatat  |
| 2941 | ttctctcttg  | ccacgaagaa  | taaagtaaaa  | cctcagctat  | attttgcgcc  | tctccctcct  |
| 3001 | ccataatgag  | cggatatttca | actgttatag  | cagcgccttg  | ctttggcaac  | tcagcatatt  |
| 3061 | taacatcaat  | tggatagcca  | aaattgcat   | taaagtaaac  | gacgttaact  | ttattgttta  |
| 3121 | aatctaattg  | actgatatta  | gcaagttttg  | aattgttact  | gaaaaccatt  | tcaccaattg  |
| 3181 | gtattccagt  | cgtaactccc  | ctgccctttt  | ggacaaaatt  | cagtttagag  | tcctgttcaa  |
| 3241 | ccacatcaaa  | aaaatagcaa  | ctttgcagca  | ttttaataat  | tgaacgtacc  | gattgctggt  |
| 3301 | cgtttatcac  | ataccacagac | aataaccctt  | tgacgttgct  | tgcatcgaac  | tgatcgcttt  |
| 3361 | ttaaaccctgt | tttttgtaac  | agatccgata  | aaacatcgga  | aatattaagc  | tgtgaaagct  |
| 3421 | ttccctgaat  | ccaatgtcct  | gtctgccaat  | tatggcagtc  | agtcacacata | tcacacaaat  |
| 3481 | tggggaaata  | aggaaatggc  | cttgcacccc  | atgccagag   | aaacattttt  | tctaccattt  |
| 3541 | ctgaactttg  | ccactttttt  | agcgttcctt  | caattgcaat  | tttttgcgaa  | agaaagctca  |
| 3601 | cctctccgtt  | tgaatatcgt  | ggatatttgc  | tctctatgct  | gcctttgtca  | acaaacacat  |

```

3661 ttggctcatt agtgcagccg ttcatactgg gaaatccata ttcagtaaac catatTTTTT
3721 tcattTTTTg ttgccatttt gttttactac caccgggggt tatgtgagtt tcactccacc
3781 atttctctat atttttccac gcatacctgc tgtcgttata ctttactttt tcagactcac
3841 tctttgagta atcatagaaa taatcatacc ccactccact gctccaacca cccattacat
3901 cttccgcaga atagccaaaa ggaggctctg gaccatcagt cagtggaaaa taagcatcta
3961 tgccaacaac gtcgatgtac tctgaagacc acagttcatc catattatac caaccatcat
4021 atgaatggta ttcgctccaa tctgcagcgt aggttaactgt tacttctttt ccaagattaa
4081 gttttattcg ctttgcaagc ttgaccagct ctataacggc agggtaattc ccttgttcat
4141 ctctgatttt ggtaagttgc gcaaagttca gaaccaatga taaacccttc cactttagtt
4201 tgtttggaat tgcttgcata atgctctata aatttggtgt actgattctt aaaaaaatca
4261 cttatatctt caggagcccc actcaatctt cctcgccact ctttgttctt tgtatcaagt
4321 aagggcattg gatagagcat caccttataa cctctgctgt gcagctcttc tatatatcta
4381 gttaacgctg catcactaac tgtgccacca taccttgggt ttccactcgc atcttttgaa
4441 attagctgag cattatctct gggtacaccc cctacttgcc aatcatcagg taatatcgcg
4501 gaatcatctt gaaattcaac tgcagggtat attttacaat ctttaatggt cagattattc
4561 acaaaccaat tgactaccac cgacaccaac tcaacatttg gcaaactctt ttttaattga
4621 tccaaagaaa gcattgcata gctcttttta gtgtggttgt tgtgatttac ccttgcgcc
4681 agcccatatg ggatatattg gttgctgctt attttctctt gcgcgatttt cttctgtatt
4741 tttgtatcat atacaaactc acctgaacct ggtatgatat tgatattccg aatatTTTT
4801 gctactgaaa attcatttga ctttactgca gtttgactt caaacgtaaa taccggaaca
4861 tgattattat agtctgctaa aggaaaattc ttgatgacta tgtaagatat tcccataaa
4921 gccggcacat tcccctctcc ttcaattgat gacataaatg gatcaggatt ttggtcttct
4981 ctgccgctgt aaaaagtata atctatttca tcaaagctaa gtgatgttgt atctgccag
5041 attctgttta atttttctac tttccccttg cagatcgcaa ttgcaagcgt tgcatagtaa
5101 ttatatgtaa cgttcatacc tcttccaatt ttacttttgg tggttatcgc ctcttctttt
5161 attggctgtg ccaaataaat attccctgca acacgagcag tgccatagat aattgggatc
5221 gttctgccgt aggttgaggt ttgaacttgc agatttttta gccttgcccc atgcgttact
5281 ttttgctcgg cttcaaggcc gaacattgcc ccatctagct gtgcaccaag aagagcacca
5341 agttctgagc cgataatccg gccaatggc caaaaaatgc tgcttgcttg accaaaaatt
5401 gatgataaaa ttattgtaga catggtaatc ctcttttttg tttctatagt taatgtaggc
5461 tctacgtcat gccgccgcgc cgctaacaag cagcgggatg acgagcttat cgttatgccg
5521 ccgcgaaccg tcataaccgtc acggtatctc tagatcctgc taacacgtag cagggtactt
5581 aaccgtcata ccgcgattca ttcgcggtat ctcttagccg ctaacaagca gcggaatgac
5641 gaatttgctg ttttacagcc acttggtatga caatttgcta ctaaatagta ggaaattcaa
5701 taatttacia

```

//

```

LOCUS      JAQZAU010000061                2713 bp    dna        linear    ENV 17-MAR-2023
DEFINITION MAG: Wolbachia pipientis isolate wEsol contig_36894, whole genome
            shotgun sequence.
ACCESSION  JAQZAU010000061 JAQZAU010000000
VERSION    JAQZAU010000061.1
DBLINK     BioProject: PRJNA929258
            BioSample: SAMN33142973
KEYWORDS   WGS; ENV; Metagenome Assembled Genome; MAG.
SOURCE     Wolbachia pipientis (insect metagenome)
ORGANISM   Wolbachia pipientis
            Bacteria; Pseudomonadota; Alphaproteobacteria; Rickettsiales;
            Anaplasmataceae; Wolbachieae; Wolbachia.
REFERENCE  1 (bases 1 to 2713)
AUTHORS    Fiutek,N., Couger,B.M., Roy,S., de la Torre,J.R. and Connor,E.F.
TITLE      Genomic assessment of the contribution of the Wolbachia
            endosymbiont of Eurosta solidaginis to gall-induction
JOURNAL     International Journal Molecular Sciences
REFERENCE  2 (bases 1 to 2713)
AUTHORS     Fiutek,N., Couger,B.M., Roy,S., de la Torre,J.R. and Connor,E.F.
TITLE      Direct Submission
JOURNAL     Submitted (10-FEB-2023) Biology, San Francisco State University,
            1600 Holloway Ave, San Francisco, CA 94132, USA
COMMENT    ##Genome-Assembly-Data-START##
            Assembly Date                :: JUN-2019

```

```

Assembly Method      :: FLYE v. 06-2019
Genome Representation :: Full
Expected Final Version :: Yes
Genome Coverage      :: 100.0x
Sequencing Technology :: Illumina HiSeq; PacBio Sequel
##Genome-Assembly-Data-END##

```

```

FEATURES             Location/Qualifiers
     source            1..2713
                        /organism="Wolbachia pipientis"
                        /mol_type="genomic DNA"
                        /submitter_seqid="contig_36894"
                        /isolate="wEsol"
                        /isolation_source="galls on Solidago altissima"
                        /host="Eurosta solidaginis MN-2018-EFC"
                        /db_xref="taxon:955"
                        /environmental_sample
                        /country="USA: Cowling Arboretum, Carleton College,
                        Northfield, MN"
                        /lat_lon="44.48 N 93.13 W"
                        /altitude="280 m"
                        /collection_date="2018-11"
                        /metagenome_source="insect metagenome"
                        /note="metagenomic"
     gene              <1..373
                        /locus_tag="wEsol_00660"
     CDS                <1..373
                        /locus_tag="wEsol_00660"
                        /codon_start=1
                        /transl_table=11
                        /product="hypothetical protein"
                        /pfam="DUF1626"
                        /translation="ICGDWQYQPEKYSKESGAQIDLVDREDGCVMLCEIKYS DKPYT
                        VTKDVEQLKRKEAIYRERTESKKQIFWVLIAANGVSENQYLKDTIHHVITLEDLFKVI
                        LNFNMYTNLRDFIKALEEKKI"
                        /besthit="qcoverage 81.3008130081301 , hcoverage
                        31.1526479750779 , similarity 99.0 , identity 96.0 ,
                        evaluate 1.74e-59 , alnlength 100 , Bacteria ,
                        Proteobacteria , MBV2146633.1 winged helix-turn-helix
                        domain-containing protein [Wolbachia endosymbiont of
                        Pissodes strobil]"
     gene              409..810
                        /locus_tag="wEsol_00661"
     CDS                409..810
                        /locus_tag="wEsol_00661"
                        /codon_start=1
                        /transl_table=11
                        /fullproduct="qcoverage 95.4887218045113 , hcoverage
                        81.4102564102564 , similarity 98.4 , identity 95.3 ,
                        evaluate 1.78e-79 , alnlength 127 , Bacteria ,
                        Proteobacteria , EAL58093.1
                        3-octaprenyl-4-hydroxybenzoate carboxy-lyase [Wolbachia
                        endosymbiont of Drosophila ananassae]"
                        /cog="UbiD COG0043 477 3-polyprenyl-4-hydroxybenzoate
                        decarboxylase and related decarboxylases"
                        /pfam="UbiD"
                        /tigr="TIGR03701 mena_SCO4490 433 menaquinone
                        biosynthesis decarboxylase, SCO4490 family"
                        /product="3-octaprenyl-4-hydroxybenzoate
                        carboxy-lyase"
                        /translation="MTEIHRRLSNKGPAAIFENVVTENGKNSIPVLVNLFGTIKRIA

```

```

LGLNINPGELRDLGKLLAFLRSPEPRKNFKDAVKMFPLLKVVLMSRSKVVSAPCQEV
VLTGDEVLDLSLLPIQTCWPNEPAPLSPDQLW"
/besthit="qcoverage 95.4887218045113 , hcoverage
81.4102564102564 , similarity 98.4 , identity 95.3 ,
evaluate 1.78e-79 , alnlength 127 , Bacteria ,
Proteobacteria , EAL58093.1
3-octaprenyl-4-hydroxybenzoate carboxy-lyase [Wolbachia
endosymbiont of Drosophila ananassae]"
gene 896..1198
/locus_tag="wEsol_00662"
CDS 896..1198
/locus_tag="wEsol_00662"
/codon_start=1
/transl_table=11
/product="hypothetical protein"
/pfam="UbiD"
/tigr="TIGR00148 TIGR00148 438 UbiD family decarboxylase"
/translation="MRWLAHRGGAGHHKRWKEKEQNMKFPAAAVIGSDPATIIAAVTP
VPETLSEYQFAGLLRKKPLELVNCKTIPLQVPAHAEIVLEGCVSLDRYQDEGPYGR"
/cog="UbiD COG0043 477 3-polyprenyl-4-hydroxybenzoate
decarboxylase and related decarboxylases"
/besthit="qcoverage 99 , hcoverage 32.3529411764706 ,
similarity 99.0 , identity 99.0 , evaluate 2.98e-63 ,
alnlength 99 , Bacteria , Proteobacteria , WP_121721681.1
UbiD family decarboxylase, partial [Wolbachia
endosymbiont of Drosophila ananassae]"
gene 1176..1523
/locus_tag="wEsol_00663"
CDS 1176..1523
/locus_tag="wEsol_00663"
/codon_start=1
/transl_table=11
/product="hypothetical protein"
/pfam="UbiD"
/tigr="TIGR00148 TIGR00148 438 UbiD family decarboxylase"
/translation="MKGHTVGDHTGYNSVEQFPEFNITAITMRKNPIYLSTFTGKPP
DEPSILGEALNEIFVPILINQFPEIVDFYLPPEGCSYRIAVISIKKVLRSRAGKKNCYG
HTFLSKAIFIHEV"
/cog="UbiD COG0043 477 3-polyprenyl-4-hydroxybenzoate
decarboxylase and related decarboxylases"
/besthit="qcoverage 73.0434782608696 , hcoverage
51.5337423312883 , similarity 100 , identity 98.8 ,
evaluate 8.43e-54 , alnlength 84 , Bacteria ,
Proteobacteria , EAL58158.1
3-octaprenyl-4-hydroxybenzoate carboxy-lyase, partial
[Wolbachia endosymbiont of Drosophila ananassae]"
gene 1571..1813
/locus_tag="wEsol_00664"
CDS 1571..1813
/locus_tag="wEsol_00664"
/codon_start=1
/transl_table=11
/product="hypothetical protein"
/translation="MWAISTRMVPVRDTITIENAPIDYLDFA SPESGIGGKM GFDATN
KIPPETKREWGEKIKMSEEIVRKVTEKWEEYGLTGD"
/cog="UbiD COG0043 477 3-polyprenyl-4-hydroxybenzoate
decarboxylase and related decarboxylases"
/besthit="qcoverage 100 , hcoverage 17.2043010752688 ,
similarity 98.8 , identity 97.5 , evaluate 7.76e-47 ,
alnlength 80 , Eukaryota , Arthropoda , CAD7414331.1

```

unnamed protein product [Timema poppensis]"  
 gene 1887..2387  
 /locus\_tag="wEsol\_00665"  
 CDS 1887..2387  
 /locus\_tag="wEsol\_00665"  
 /codon\_start=1  
 /transl\_table=11  
 /fullproduct="qcoverage 100 , hcoverage 100 , similarity 99.4 , identity 99.4 , evalue 1.00e-114 , alnlength 166 , Eukaryota , Arthropoda , GFR09019.1 phospholipase D [Trichonephila clavata]"  
 /cog="Cls COG1502 438  
 Phosphatidylserine/phosphatidylglycerophosphate/  
 cardiolipin synthases and related enzymes"  
 /pfam="PLDc\_2 Regulator\_TrmB Pfam-B\_9369 DUF1669"  
 /product="phospholipase D"  
 /translation="MCFSLYYYAGFIFSPCPKATVCFSPGEDCAVPIISVIDQSKKSI  
 LVQEYTFTLGTVAKSLINAKERGVDVKVILDKSQLYSKYSVINELFSGGVPIWIDDKP  
 KIAHNKIMIVDNQKVITGSFNLSKTAKKGNAENLLIITDYPELIQQYVKNWEVRMSQS  
 YKYAPN"  
 /besthit="qcoverage 100 , hcoverage 100 , similarity 99.4 , identity 99.4 , evalue 1.00e-114 , alnlength 166 , Eukaryota , Arthropoda , GFR09019.1 phospholipase D [Trichonephila clavata]"  
 gene 2497..>2713  
 /locus\_tag="wEsol\_00666"  
 CDS 2497..>2713  
 /locus\_tag="wEsol\_00666"  
 /codon\_start=1  
 /transl\_table=11  
 /product="hypothetical protein"  
 /translation="MDYINDADGSYTAIHDFQNNGVGDYKVQCSYGGVPYATDEYVH  
 SGDKFWSNNFIDSHFGREIKKSFPCTCFP"  
 /besthit="qcoverage 88.8888888888889 , hcoverage 35.5555555555556 , similarity 100 , identity 100 , evalue 4.99e-42 , alnlength 64 , Bacteria , Proteobacteria , MBV2146636.1 hypothetical protein [Wolbachia endosymbiont of Pissodes strobi]"  
 of Pissodes strobi]"

#### ORIGIN

```

1  tatatgtgga gattggcaat atcaaccaga aaaatacagt aaagagtctg gtgctcaaat
61  agatctagtt ttcgatcgag aagatggatg tgtaatgctc tgtgagataa aatatagtga
121 taaaccttat acagtaacaa aggatgtcga acaattaaaa agaaaagaag caatttatag
181 agaaagaacg gaatcaaaaga agcaaatatt ctgggtgtta attgctgcaa atggagtttc
241 tgagaaccaa tatctaaaag atacgataca tcatgtgatt acactagaag acttgtttaa
301 agttatttta aattttaata tgtacaccaa cttacgcgac ttcattaaag ccttagaaga
361 aaaaaagatc tgattaggat taaggaggaa gtttcaacag ttcttgaaat gacagaaatt
421 caccgtagga ttttgtcaaa taaaggacca gctatcatct ttgaaaatgt tgtcacggaa
481 aacggtaaaa attcgattcc agttttggtg aatttatattg gtactattaa gaggattgca
541 ttggggttga acataaaccc tgggtgaacta agagatcttg gtaaaccttt agcatttttg
601 cgatcacctg agccacgaaa aaacttcaaa gatgccgtga aaatgtttcc tttactaaaa
661 gttgtattgt cgatgcgaag taaagttgtg agcaaggctc catgtcaaga agtggtgcta
721 actgggggatg aggtggatct tagtttgcta cctattcaaa catgctggcc aaatgaacct
781 gcaccactat cacctgacca attgtggtga caaaaggccc aatggaagac aagcaagata
841 atttcaatct tggaaatatat cgtatgcagg ttacagataa aaaaaaacga ctctaattgcg
901 ctggcttgca catcgtggtg gtgcagggtc ccacaaacga tggaaagaga aggaacaaaa
961 tatgaaatth cctgctgctg ctgtgatcgg tagtgatcct gcaacaatta ttgctgcggt
1021 aactccagtg ccagaaacat tgtcagaata ccaatttgct gggttgctgc gcaaaaaacc
1081 gcttgagctt gtaaattgta agactattcc gcttcaagtg ccagctcatg cagagattgt
1141 tctggaaggc tgtgtaagtt tggatagata tcaagatgaa gggccatacg gtcggtgatc
1201 acaccggcta ctataattct gttgagcaat ttccagaatt taatattact gcaattacta

```

```

1261 tgcgcaaaaa tccaattttat ctcagcactt tcaactggcaa gccacctgat gaaccatcta
1321 ttcttgggtga agcgctcaac gaaatctttg tgcccattct tatcaatcaa tttccagaga
1381 tagtggattt ttatctacca ccagaagggt gttcatatag aatagcgggtg atatcgataa
1441 aaaaagtttt atccagggca ggcaaaaaga attgttatgg gcatactttc ctttctaaag
1501 caatttttat acacgaagtt taattatcgt tgttgatgat gatataaatg tacgtgattg
1561 gaaggaagtg atgtgggcaa tatcaacgag aatgggtccct gtgcgtgaca caatcacaat
1621 agagaacgca cctattgatt atttagattt tgcttcccct gaaagtggaa ttggtggtaa
1681 aatgggattt gatgcaacaa ataaaatccc gcctgaaacc aagcgagaat ggggagagaa
1741 aattaaatg agtgaggaaa tagtaagaaa agtcacggag aagtgggaag aatatggatt
1801 gacaggtgat taaattatga tgtagcctat cgccgtatat ccgggggtgg gttgttgatg
1861 ggctttttca ctttttattc ttgttaatgt gtttttctct gtattactat gcgggtttta
1921 tattttcgcc ctgccccaaa gctacgggtt gcttttcacc tggagaagat tgtgctgtac
1981 cgataatcag cgtaatagat cagtctaaaa aatctatctt agttcaagaa tatacattta
2041 ctcttggaac agttgcaaaa tctttgatta atgctaaaga acgcggtggt gatgttaaag
2101 tcatcttaga taaatcgcaa ctctactcaa aatatagtgt tataaatgaa ttattttcag
2161 gtggagtacc aatttggatc gatgataagc caaagattgc tcataataag ataatgattg
2221 ttgacaatca aaaagtcac acaggggtcat ttaaccttag taagacagct aaaaaaggaa
2281 atgctgagaa tttattaatt attacagatt atcctgaatt gattcagcag tatgtgaaaa
2341 actgggaggt acgaatgtca caatcttata aatacgctcc caactaatcg agagcgcttg
2401 cttaaaatca gttctaaaaa cagcaagaga gagctttttt gattgattga cataatgatt
2461 atgatataat gaactaaaag tttaagggaat aaagtaatgg attatataaa tgatgctgac
2521 ggtagctaca ctgccattca tgattttttt caaaacaacg gtgttgagaa ttacaaagtt
2581 caatgcagtt atggtggggg gccgtatgct actgatgaat acgtgcattc tggcgataaa
2641 ttttgagata ataatttcat agactcacat tttggcaggg aaataaaaaa gtcttttccg
2701 acttgttttc cag

```

//

```

LOCUS      JAQZAU010000062                1424 bp    dna        linear    ENV 17-MAR-2023
DEFINITION MAG: Wolbachia pipientis isolate wEsol contig_37018, whole genome
            shotgun sequence.
ACCESSION  JAQZAU010000062 JAQZAU010000000
VERSION    JAQZAU010000062.1
DBLINK     BioProject: PRJNA929258
            BioSample: SAMN33142973
KEYWORDS   WGS; ENV; Metagenome Assembled Genome; MAG.
SOURCE     Wolbachia pipientis (insect metagenome)
  ORGANISM Wolbachia pipientis
            Bacteria; Pseudomonadota; Alphaproteobacteria; Rickettsiales;
            Anaplasmataceae; Wolbachieae; Wolbachia.
REFERENCE  1 (bases 1 to 1424)
  AUTHORS  Fiutek,N., Couger,B.M., Roy,S., de la Torre,J.R. and Connor,E.F.
  TITLE    Genomic assessment of the contribution of the Wolbachia
            endosymbiont of Eurosta solidaginis to gall-induction
  JOURNAL  International Journal Molecular Sciences
REFERENCE  2 (bases 1 to 1424)
  AUTHORS  Fiutek,N., Couger,B.M., Roy,S., de la Torre,J.R. and Connor,E.F.
  TITLE    Direct Submission
  JOURNAL  Submitted (10-FEB-2023) Biology, San Francisco State University,
            1600 Holloway Ave, San Francisco, CA 94132, USA
COMMENT    ##Genome-Assembly-Data-START##
            Assembly Date           :: JUN-2019
            Assembly Method         :: FLYE v. 06-2019
            Genome Representation    :: Full
            Expected Final Version   :: Yes
            Genome Coverage          :: 100.0x
            Sequencing Technology    :: Illumina HiSeq; PacBio Sequel
            ##Genome-Assembly-Data-END##
FEATURES   Location/Qualifiers
  source    1..1424
            /organism="Wolbachia pipientis"
            /mol_type="genomic DNA"

```

```

/submitter_seqid="contig_37018"
/isolate="wEsol"
/isolation_source="galls on Solidago altissima"
/host="Eurosta solidaginis MN-2018-EFC"
/db_xref="taxon:955"
/environmental_sample
/country="USA: Cowling Arboretum, Carleton College,
Northfield, MN"
/lat_lon="44.48 N 93.13 W"
/altitude="280 m"
/collection_date="2018-11"
/metagenome_source="insect metagenome"
/note="metagenomic"
gene complement(153..494)
CDS /locus_tag="wEsol_00667"
complement(153..494)
/locus_tag="wEsol_00667"
/codon_start=1
/transl_table=11
/fullproduct="qcoverage 100 , hcoverage 100 , similarity
100 , identity 100 , evalue 1.53e-79 , alnlength 113 ,
Bacteria , Proteobacteria , AAS13810.1 transposase, IS5
family, OrfB [Wolbachia endosymbiont of Drosophila
melanogaster]"
/cog="COG3293 COG3293 124 Transposase and inactivated
derivatives"
/pfam="DDE_Tnp_1_2 DDE_Tnp_1"
/product="transposase, IS5 family, OrfB"
/translation="MRTKYTKVKKMWADMGYQGRNLKNHIKEEYDIDIEIVKRPPCRF
WVHKDTPPELLPTREQGFKVQPRRWVVERTFAWVNRNRRLSKEYDLLTTSTENFIYLA
MSRVMLKREYA"
/besthit="qcoverage 100 , hcoverage 100 , similarity 100
, identity 100 , evalue 1.53e-79 , alnlength 113 ,
Bacteria , Proteobacteria , AAS13810.1 transposase, IS5
family, OrfB [Wolbachia endosymbiont of Drosophila
melanogaster]"
gene complement(605..985)
CDS /locus_tag="wEsol_00668"
complement(605..985)
/locus_tag="wEsol_00668"
/codon_start=1
/transl_table=11
/fullproduct="qcoverage 100 , hcoverage 100 , similarity
100 , identity 100 , evalue 1.16e-87 , alnlength 126 ,
Bacteria , Proteobacteria , AOV87106.1 transposase
[Wolbachia endosymbiont of Drosophila incompta]"
/cog="COG3293 COG3293 124 Transposase and inactivated
derivatives"
/pfam="DUF4096"
/product="transposase"
/translation="MRKKYPTDLSEREWARIKHFVRSYKKGGRPPKYSKREILEAIF
YVLRITGCQWRYLPNDFPLWKTVYEQFRQWKKQGIFEKMNIEITKYSRRKIGRNEQPSA
CIVDSQSVKTTEKGGSKAMMEVKK"
/besthit="qcoverage 100 , hcoverage 100 , similarity 100
, identity 100 , evalue 1.16e-87 , alnlength 126 ,
Bacteria , Proteobacteria , AOV87106.1 transposase
[Wolbachia endosymbiont of Drosophila incompta]"
gene 1180..>1424
CDS /locus_tag="wEsol_00669"
1180..>1424

```

```

/locus_tag="wEsol_00669"
/codon_start=1
/transl_table=11
/fullproduct="qcoverage 100 , hcoverage 91.0112359550562
, similarity 98.8 , identity 98.8 , evalue 1.08e-50 ,
alnlength 81 , Bacteria , Proteobacteria , WP_213863653.1
PD-(D/E)XK nuclease family transposase, partial
[Wolbachia endosymbiont of Ceratitis capitata]"
/pfam="PDDEXK_2"
/tigr="TIGR01784 T_den_put_tspse 273 conserved
hypothetical protein"
/product="PD-(D/E)XK nuclease family
transposase, partial"
/translation="MALSKFLDPRNDLCFKKIFGTEKNKNILTHFLNDILGFTEINAI
QEVEFLSTIMDPEVASDKQSIVDVLCKDSHGNYIAE"
/besthit="qcoverage 100 , hcoverage 91.0112359550562 ,
similarity 98.8 , identity 98.8 , evalue 1.08e-50 ,
alnlength 81 , Bacteria , Proteobacteria , WP_213863653.1
PD-(D/E)XK nuclease family transposase, partial
[Wolbachia endosymbiont of Ceratitis capitata]"

```

# ORIGIN

```

1 aacacgatct ttcatttgag ctttcttcaa tttaaaataa atacagaaaa ttgctgccta
61 tagctaaact gacttacgac aatttgaaaa actgtcatcc cgctacttgt tagcgggatc
121 tatgctaaga ggttgtccgg aaactagtaa attcaagcat attccctctt taacataacc
181 ctactcatag ctaggtatat gaaattctca gtggatgttg tgagtaaadc atactccttc
241 gatagccttc tattcctatt aaccaagca aaagtccttt ctacaacca tcttcttggc
301 tgtactttta acccttggtc tcttggttgt agtagctcag gtggcgtatc tttgtgcacc
361 caaatctac atggaggcct ttaacaatt tcaatatcta tgtcatattc ttcctttatg
421 tgattcttta aatttcttcc ttggtatccc atgtcagccc acattttttt aacttttagta
481 tattttgttc tcatattggt taatgctatt ttaataccat ctctatcatt ttcgtagca
541 gcgcctacgt aacaacctag tataaaaccc tgagtgtctg taattatatg cctttttcta
601 ccctttactt ttttacttcc atcatagcct ttgatcccc cttttctgta gtctttacag
661 attgactatc tactatacag gcactcggct gctcattcct tcctattttt cttctactat
721 attttgtaat ttcataattc attttctcaa aaattccctg cttcttccat tgcctgaact
781 gtcatacac agtcttccat agcggaaaat catttggtta ataccgcat tgacaccctg
841 tacgcaatac atagaaaatt gcttctaata tttctctttt gctatacttt ggcggccttc
901 ctcttttctt gtatgatact ctgaagtgtt tttctattct tgcccattcc ctttcgctta
961 gatctgttgg atactttttt ctcattctta ccccgtaata aaatttcaga tattatagcc
1021 ttttacttat ttccggacaa cctctaagat accgcgaatg aatcgcggtg tgacggttcg
1081 tggcggttat gacgtgttag ctatagctat cttcaaaaat atggttgaat aattgttaat
1141 aatagtgtat aattattaat atttttaagc acttttgcta tggctctttc aaaatttctc
1201 gatcctcgca atgatttgtg tttcaaaaaa atctttggaa cggaaaaaaa taagaatadc
1261 ctgaccact ttttgaacga tattttaggg tttactgaga taaatgcaat acaagaagtt
1321 gagtttctta gcactattat ggatcccgaa gttgcctctg ataaacaaag tattgttgat
1381 gttctctgca aggattctca cggaaataga tatatagcag aaat

```

//

```

LOCUS      JAQZAU010000063          10423 bp    dna       linear     ENV 17-MAR-2023
DEFINITION MAG: Wolbachia pipientis isolate wEsol contig_37429, whole genome
            shotgun sequence.
ACCESSION  JAQZAU010000063  JAQZAU010000000
VERSION    JAQZAU010000063.1
DBLINK     BioProject: PRJNA929258
            BioSample: SAMN33142973
KEYWORDS   WGS; ENV; Metagenome Assembled Genome; MAG.
SOURCE     Wolbachia pipientis (insect metagenome)
ORGANISM   Wolbachia pipientis
            Bacteria; Pseudomonadota; Alphaproteobacteria; Rickettsiales;
            Anaplasmataceae; Wolbachieae; Wolbachia.
REFERENCE  1 (bases 1 to 10423)
AUTHORS    Fiutek,N., Couger,B.M., Roy,S., de la Torre,J.R. and Connor,E.F.

```

TITLE Genomic assessment of the contribution of the Wolbachia  
 endosymbiont of Eurosta solidaginis to gall-induction  
 JOURNAL International Journal Molecular Sciences  
 REFERENCE 2 (bases 1 to 10423)  
 AUTHORS Fiutek,N., Couger,B.M., Roy,S., de la Torre,J.R. and Connor,E.F.  
 TITLE Direct Submission  
 JOURNAL Submitted (10-FEB-2023) Biology, San Francisco State University,  
 1600 Holloway Ave, San Francisco, CA 94132, USA  
 COMMENT ##Genome-Assembly-Data-START##  
 Assembly Date :: JUN-2019  
 Assembly Method :: FLYE v. 06-2019  
 Genome Representation :: Full  
 Expected Final Version :: Yes  
 Genome Coverage :: 100.0x  
 Sequencing Technology :: Illumina HiSeq; PacBio Sequel  
 ##Genome-Assembly-Data-END##  
 FEATURES Location/Qualifiers  
 source 1..10423  
 /organism="Wolbachia pipientis"  
 /mol\_type="genomic DNA"  
 /submitter\_seqid="contig\_37429"  
 /isolate="wEsol"  
 /isolation\_source="galls on Solidago altissima"  
 /host="Eurosta solidaginis MN-2018-EFC"  
 /db\_xref="taxon:955"  
 /environmental\_sample  
 /country="USA: Cowling Arboretum, Carleton College,  
 Northfield, MN"  
 /lat\_lon="44.48 N 93.13 W"  
 /altitude="280 m"  
 /collection\_date="2018-11"  
 /metagenome\_source="insect metagenome"  
 /note="metagenomic"  
 gene complement(298..474)  
 /locus\_tag="wEsol\_00670"  
 CDS complement(298..474)  
 /locus\_tag="wEsol\_00670"  
 /codon\_start=1  
 /transl\_table=11  
 /fullproduct="qcoverage 100 , hcoverage 100 , similarity  
 100 , identity 100 , evalue 5.86e-32 , alnlength 58 ,  
 Bacteria , Proteobacteria , WP\_179945710.1 MULTISPECIES:  
 hypothetical protein [Wolbachia]"  
 /translation="MKKKAKEALGLLSALKYWRFKRLTSEIQPLLIATNLRCKCL  
 RNLLSRKKDKESPS"  
 /product="hypothetical protein"  
 /besthit="qcoverage 100 , hcoverage 100 , similarity 100  
 , identity 100 , evalue 5.86e-32 , alnlength 58 ,  
 Bacteria , Proteobacteria , WP\_179945710.1 MULTISPECIES:  
 hypothetical protein [Wolbachia]"  
 gene 803..2146  
 /locus\_tag="wEsol\_00671"  
 CDS 803..2146  
 /locus\_tag="wEsol\_00671"  
 /codon\_start=1  
 /transl\_table=11  
 /fullproduct="qcoverage 100 , hcoverage 100 , similarity  
 100 , identity 100 , evalue 1.63e-313 , alnlength 447 ,  
 Bacteria , Proteobacteria , WP\_141457221.1 MULTISPECIES:  
 DNA repair protein RadA [unclassified Wolbachia]"

```

/cog="Sms COG1066 456 Predicted ATP-dependent serine
protease"
/pfam="Pfam-B_5795 RecA AAA_25 DnaB_C KaiC AAA_16 GvpD
AAA_24 AAA_22 AAA DnaB_C KaiC ChlI Lon_C"
/tigr="TIGR00416 sms 454 DNA repair protein RadA"
/product="DNA repair protein
RadA"
/translation="MKTVYVCQSCGHSTGRWVGKCIACDNWDTIVEEIAVKTGKRSIS
APILIKTLGSEIITPSRFLTGIEELDRVFGGGIVQGASILIGGEPGIGKSTLLLRIA
ANVVQLSSFECYVSGEESLEQVSLRAKRLKINEPKIKLLSTVSLTDVVATIKENKSI
KFLVIDSIQTMYSRITSAPGTVTQVRTCAHELTILAKQYGVSLIVGHITKDGQIAG
PKTLEHMDTVLYFEGENSNQYRILRTIKNRFGPANEIGVFEMSEAGLVPVDNPSSLF
LMAHDREVVGSAVFAGIEGSRPILMEVQALIAGTNMATPRRAVVGWDINRLAMIIAVL
NARCKMFLHDKEVYLNIAGGLKIQEPSADLAVAASLISSVVNLPLPTSSIICGEVALS
GEIRNVSHADLRLKEAQKLGFKKAIMPKNNGYSSHDIEI IKLGHVRELREVFNYN"
/besthit="qcoverage 100 , hcoverage 100 , similarity 100
, identity 100 , eval 1.63e-313 , alnlength 447 ,
Bacteria , Proteobacteria , WP_141457221.1 MULTISPECIES:
DNA repair protein RadA [unclassified Wolbachia]"
gene complement(2133..3044)
/locus_tag="wEsol_00672"
CDS complement(2133..3044)
/locus_tag="wEsol_00672"
/codon_start=1
/transl_table=11
/fullproduct="qcoverage 100 , hcoverage 100 , similarity
100 , identity 100 , eval 8.88e-211 , alnlength 303 ,
Bacteria , Proteobacteria , WP_015589234.1 MULTISPECIES:
signal recognition particle-docking protein FtsY
[unclassified Wolbachia]"
/cog="FtsY COG0552 340 Signal recognition particle
GTPase"
/pfam="SRP54_N Pfam-B_5968 Pfam-B_12884 AAA_30 Zeta_toxin
AAA_22 ArgK SRP54 AAA_14 AAA_19 cobW MobB CbiA CmcI
IstB_IS21"
/tigr="TIGR00064 ftsY 279 signal recognition
particle-docking protein FtsY"
/product="signal recognition
particle-docking protein FtsY"
/translation="MSLFSNLYKGLLKTSRFS DGVSIFSGKKKLDQSLLELEELL
ISMDIGHKTSKLIIDRLTSIKFDKEVEHNIISQQLMNEIEAILSPVVQPLILNKKPHI
IMVCGVNGNGKTTTIGKLAYKYKEMGKSVMLVACDTFRAAASEQLNIWAERSDCLIVT
GEYGS DSASVAYRAVSQAIKDNVDVVLIDTAGRLQNNVNLMEELSKIYRTIKLDDTA
PHDVILVLDATTGQNAYSQLEAFSKMVHVTGLIVTKLDGTAKGGVIGLAEAYKVKLH
AIGIGENIEDLREFTSKEFAEALFNCN"
/besthit="qcoverage 100 , hcoverage 100 , similarity 100
, identity 100 , eval 8.88e-211 , alnlength 303 ,
Bacteria , Proteobacteria , WP_015589234.1 MULTISPECIES:
signal recognition particle-docking protein FtsY
[unclassified Wolbachia]"
gene 3248..3631
/locus_tag="wEsol_00673"
CDS 3248..3631
/locus_tag="wEsol_00673"
/codon_start=1
/transl_table=11
/fullproduct="qcoverage 100 , hcoverage 100 , similarity
100 , identity 100 , eval 9.86e-85 , alnlength 127 ,
Bacteria;Eukaryota , Proteobacteria;Arthropoda ,
WP_007548853.1 MULTISPECIES: Fe-S cluster assembly

```

```

scaffold IscU [Wolbachia]"
/cog="IscU COG0822 150 NifU homolog involved in Fe-S
cluster formation"
/pfam="NifU_N Pfam-B_829"
/tigr="TIGR01999 iscU 124 FeS cluster assembly scaffold
IscU"
/product="Fe-S cluster
assembly scaffold IscU"
/translation="MSYNEKILDHYENPRNVGSLDKNDPNVGTGLVGAPSCGDV MKLQ
IKVNDKGVIEDAKFKTFGCGSAIASSSLITEMIKGRTISDVTQIKNTQIVEELSLPPV
KIHCSVLAEDAIIKAAIHQYQSKQKN"
/besthit="qcoverage 100 , hcoverage 100 , similarity 100
, identity 100 , evalue 9.86e-85 , alnlength 127 ,
Bacteria;Eukaryota , Proteobacteria;Arthropoda ,
WP_007548853.1 MULTISPECIES: Fe-S cluster assembly
scaffold IscU [Wolbachia]"
gene 3637..4050
/locus_tag="wEsol_00674"
CDS 3637..4050
/locus_tag="wEsol_00674"
/codon_start=1
/transl_table=11
/fullproduct="qcoverage 100 , hcoverage 100 , similarity
100 , identity 100 , evalue 4.21e-93 , alnlength 137 ,
Bacteria , Proteobacteria , WP_174516985.1 iron-sulfur
cluster assembly accessory protein [Wolbachia
endosymbiont of Cardiocondyla obscurior]"
/cog="sufA COG0316 110 Fe-S cluster assembly scaffold
protein"
/pfam="Fe-S_biosyn"
/tigr="TIGR00049 TIGR00049 106 iron-sulfur cluster
assembly accessory protein"
/product="iron-sulfur cluster assembly
accessory protein"
/translation="MSEYQEVGGGETVKKNRKLITITAKAVERIRYLLDQKKHTNLEK
PEEAIGIRVLIKQKGCGLKYDIEYAYDTRPLESIIIEENCSDQKVVLIDPKSVMFI
LGSEMDYVEEKFFSSGFVFKNPNEKGKCGCGESFHV"
/besthit="qcoverage 100 , hcoverage 100 , similarity 100
, identity 100 , evalue 4.21e-93 , alnlength 137 ,
Bacteria , Proteobacteria , WP_174516985.1 iron-sulfur
cluster assembly accessory protein [Wolbachia
endosymbiont of Cardiocondyla obscurior]"
gene 4043..4501
/locus_tag="wEsol_00675"
CDS 4043..4501
/locus_tag="wEsol_00675"
/codon_start=1
/transl_table=11
/fullproduct="qcoverage 100 , hcoverage 100 , similarity
100 , identity 100 , evalue 6.20e-100 , alnlength 152 ,
Bacteria , Proteobacteria , WP_015589237.1 MULTISPECIES:
hypothetical protein [unclassified Wolbachia]"
/pfam="DnaJ_HSCB_C"
/tigr="TIGR00714 hscB 156 Fe-S protein assembly
co-chaperone HscB"
/product="hypothetical protein"
/translation="MSSSYFTLFEIEPTFNISFDELEKKYIELSKTDINERQSQNMEN
INRAYQILKSPLKRAEHLDDFFDVKSQKDHLNSEILSESMEIREYLLDCDDLQFASRM
IDEKIKDCVKNLINTFAIKNFDGAATQVLRLLKYLYKSFEVVKKNATNSNF"
/besthit="qcoverage 100 , hcoverage 100 , similarity 100

```

```

, identity 100 , evalue 6.20e-100 , alnlength 152 ,
Bacteria , Proteobacteria , WP_015589237.1 MULTISPECIES:
hypothetical protein [unclassified Wolbachia]"
gene 4479..6227
/locus_tag="wEsol_00676"
CDS 4479..6227
/locus_tag="wEsol_00676"
/codon_start=1
/transl_table=11
/fullproduct="qcoverage 100 , hcoverage 100 , similarity
100 , identity 100 , evalue 0.0 , alnlength 582 ,
Bacteria , Proteobacteria , WP_141457223.1 MULTISPECIES:
Fe-S protein assembly chaperone HscA [unclassified
Wolbachia]"
/cog="DnaK COG0443 579 Molecular chaperone"
/pfam="HSP70 MreB_Mbl Pfam-B_178 Pfam-B_4180"
/tigr="TIGR01991 HscA 600 Fe-S protein assembly chaperone
HscA"
/product="Fe-S protein
assembly chaperone HscA"
/translation="MQPIQISEPNSSSEVIFGIDLGTNSLIAMVKNAGNVEIFEDEQG
RELLPSALSYENNTLKTGYDVGQNAIYSIKRLMGKSVEELNKEGVNFEIDHESEKVIK
IKCAEEKYLTTPVEISAEILKALCERVKKSKGLEVKKAVITVPAYFDDSAARNATKYAAK
LAGIEVLRLVNEPTAAALSYISIEKNSSGIYAVYDLGGGTFDISILKLHQGVFQVLAV
GGDTKLGGDDFDHLLSSIVIDKYREKTAKQLNSLLIESRSVKEYLSKNTSGIFEFSIN
GKPFCEITREEFEQAISLVNKTINIVTRTISDIDLKIDNIKGVILVGGATRTPLVQ
NSLVKLFGNKVLNDVDPDKAVAIGAALQAHDLTSSSKDRNILLDVLPLSLGIETMGGI
VEKIIIPRNTPLPVSETKEFTTYFDGQTAMKIHVCQGEREMIEDNKSIAQFELKGIPPL
PAGSARVEIEFTVNVDGILTVTAREKTTGIEQTVEVNSSFGLSEADVQNMVNQSINSF
DEDMKARSLAGAKINGNKLHLVENNNNLSTDQKLKNLLQNAKNALQGNDLNEINNTI
AELENSSELELCELTNR"
/besthit="qcoverage 100 , hcoverage 100 , similarity 100
, identity 100 , evalue 0.0 , alnlength 582 , Bacteria ,
Proteobacteria , WP_141457223.1 MULTISPECIES: Fe-S
protein assembly chaperone HscA [unclassified Wolbachia]"
gene complement(6235..6981)
/locus_tag="wEsol_00677"
CDS complement(6235..6981)
/locus_tag="wEsol_00677"
/codon_start=1
/transl_table=11
/fullproduct="qcoverage 100 , hcoverage 100 , similarity
100 , identity 100 , evalue 6.91e-176 , alnlength 248 ,
Bacteria , Proteobacteria , WP_010962911.1 MULTISPECIES:
signal peptidase I [Wolbachia]"
/cog="LepB COG0681 166 Signal peptidase I"
/pfam="Pfam-B_817 Peptidase_S24 Peptidase_S26
Peptidase_S26"
/tigr="TIGR02227 sigpep_I_bact 162 signal peptidase I"
/product="signal peptidase
I"
/translation="MEELSKNWVIRTGRFLSSLFLLLIALSIRSFLFEPFHIPSGSM
KSTLLEGDYIFTSKYSYGYSKHSFPFSPNIFSGRIFYTPPKRGDIVVFKPTRNDSIRF
VKRVIGTPGDKVQMIEGELYLNDQKVERRQIESFFDYESNRNIPRYIETLLSGKEHEI
LVDDISNKLSYNTPVYYYVPNDQFFVMGDNRRNNSLDSRFPEVGFPVPMENIIGRVSIVGL
SFKLGKVDWLFPNFRLPVALRLNRVLHKVV"
/besthit="qcoverage 100 , hcoverage 100 , similarity 100
, identity 100 , evalue 6.91e-176 , alnlength 248 ,
Bacteria , Proteobacteria , WP_010962911.1 MULTISPECIES:
signal peptidase I [Wolbachia]"

```

```

gene      complement(7923..8810)
          /locus_tag="wEsol_00678"
CDS       complement(7923..8810)
          /locus_tag="wEsol_00678"
          /codon_start=1
          /transl_table=11
          /fullproduct="qcoverage 100 , hcoverage 100 , similarity
100 , identity 100 , evalue 3.76e-208 , alnlength 295 ,
Bacteria , Proteobacteria , WP_015589239.1 MULTISPECIES:
aspartate carbamoyltransferase catalytic subunit
[Wolbachia]"
          /cog="PyrB COG0540 316 Aspartate carbamoyltransferase,
catalytic chain"
          /pfam="OTCace_N OTCace"
          /tigr="TIGR00670 asp_carb_tr 304 aspartate
carbamoyltransferase"
          /product="aspartate
carbamoyltransferase catalytic subunit"
          /translation="MNKRRNLLNISDLTVDDVENITKLANQYLLKKEVANSIHLENKTV
INLFFEDSTRTLASFEIAAKSLGANVVTLPIRSSSINKGEDLKDMIKTLNAMNPDYII
IRHKSSGIINTLAKYVNCSLINAGDGSSEHPTQALADYLVISNHKKQIKDLKVVICGD
ILHSRVARSNIRLLKMFGEINLVAPPTLICKHFPEVDSVHYSLIEGIKDADVIMLLR
LQKERMNNSSEKEYFHLGLDLQKLSYAKPDAIVMHPGPINRGIEISSDVADCVILQ
QVEFGLAIRKAVLHYRPC"
          /besthit="qcoverage 100 , hcoverage 100 , similarity 100
, identity 100 , evalue 3.76e-208 , alnlength 295 ,
Bacteria , Proteobacteria , WP_015589239.1 MULTISPECIES:
aspartate carbamoyltransferase catalytic subunit
[Wolbachia]"
gene      complement(9031..10056)
          /locus_tag="wEsol_00679"
CDS       complement(9031..10056)
          /locus_tag="wEsol_00679"
          /codon_start=1
          /transl_table=11
          /fullproduct="qcoverage 100 , hcoverage 100 , similarity
100 , identity 100 , evalue 1.12e-239 , alnlength 341 ,
Bacteria , Proteobacteria , WP_010082338.1 MULTISPECIES:
Fe(3+) ABC transporter substrate-binding protein
[Wolbachia]"
          /cog="AfuA COG1840 299 ABC-type Fe3+ transport system,
periplasmic component"
          /pfam="SBP_bac_11 Phosphonate-bd SBP_bac_1 SBP_bac_8
SBP_bac_6"
          /tigr="TIGR03261 phnS2 334 putative
2-aminoethylphosphonate ABC transporter, periplasmic
2-aminoethylphosphonate-binding protein"
          /product="Fe(3+) ABC
transporter substrate-binding protein"
          /translation="MKKAFIFTSLIAIILIVITYLYRNDGTNDSQVVNVYSSRKEELV
RTLFDEFTKNTGIKVRYYIIDDYSQLLSRMENGGEADLFLTADAINLILAKKRGLLSQV
DSEVLKSVIPARFRDSEDYWFGTLKRARILVYNKESVDPKDLSTYEDLANEKWKGKIL
VRSSSTSPYNRSLIAFMIANNGFEKTKEWVSGIVSNMARKPSGGDTDQIYAVAAGEGDV
AIVNSYYFARILSSENKKNVADKLGAFPPNRNDHGMVNISGAAVTKNAKNRENAIVL
LEFLVSKQAQELYAKKNQEYPIIEGVETSDILKSWGNYSDLDLPLSELEKHLFEAVMI
ADECKWK"
          /besthit="qcoverage 100 , hcoverage 100 , similarity 100
, identity 100 , evalue 1.12e-239 , alnlength 341 ,
Bacteria , Proteobacteria , WP_010082338.1 MULTISPECIES:
Fe(3+) ABC transporter substrate-binding protein

```

## [Wolbachia]"

## ORIGIN

```

1  tacataacca tataacattg ggaatagaaa caaaaaactt gcttgacacc cttcgccagc
61  ccccttatca taaaactgaa gctattgtat ttgctttcgc cgatctgcag attaaaaggt
121 aaggattact taatgtatcg gcgtcttatg ttcaattttt tgcagtatat agatactgta
181 tgtctttaca aaacttcacg tacatctaga tttttatcta aataagctga acgcgcttat
241 aaagcggttac aagacatcaa aaaatgccaa tactcgacag agatagtaaa agactagcta
301 actcggggat tctttgtctt tttttctgct tagtaaattt cttaaacatt tgcagcgtaa
361 gttagttgca attaaaagcg gctgaatctc gcttgtaag cgtttaaaac ataaaaaacg
421 ccaatatttt aaagcggata ataaccacag ggcttctttt gccttttttt tcatttggtta
481 aatttcttaa tgtttatggc taaacgacaa tcgtcatccc gctacgtggt agcggctaag
541 agataccgcg gcggtatgac ggtttgcggc ggcattgacct cgctattccc ctacgtgtta
601 gcgggatcta gagataccgt gacggtatga cggttcgcgc ggtggcatga cctcgtcatc
661 ccgctacttg ttagcgggat ctagagatac cgcgaatgaa tcgcggtatg acatagggaa
721 ccctttcttg ggtagctat agatttactt cgcataattca gctaattttt attacaatta
781 caacaaaata attttggtt tgatgaaaac tgtatatgta tgtcaatcct gtggtcacag
841 cactggtagg tgggtaggga agtgcacgc atgtgacaat tgggatacaa ttggtgagga
901 aatagcagta aaaacgggca aaagaagtat atctgcacca attttaataa agacgttatc
961 gggtagcgaa attatcactc caagtcgttt tttaacagga atagaagaat tagatagagt
1021 ttttggtggg ggtatcggtc aaggtgctag cattttaatt ggtggcgaa cctggtattg
1081 aaaatccacc cttttgctta gaattgcagc taatgttgtg caactttcct cttttgaatg
1141 tctttatgta tccggcgagg agtctttaga gcaggtgagt ctcagagcaa agcgtcttaa
1201 gataaatgaa cctaaaatta agcttttatc tacagtgtct ttaactgatg tagtagcaac
1261 aataaaggaa aacaaaagta ttaaattctt agtaattgac tctatacaaa caatgtatga
1321 tagcagaatt acatcggcac caggaactgt aactcagggt cgtacttgcg cacatgaatt
1381 aactattctt gcgaacaat atgggtgttc tcttttaata gttggtcata taactaagga
1441 tggacaaata gctggaccca aaactctgga gcataatggt gatacgggat tataatttga
1501 aggtgaaaat agcaatcaat atcgcatttt gcgtactatt aaaaatagat ttggccctgc
1561 aatgaaatt ggtgtttttg agatgtctga agcaggactt gtgcctgttg ataaccatc
1621 atcattgttt ctgatggccc atgacagaga agtagttggc agcgccgtat ttgcaggaat
1681 tgaaggttca agaccaattt taatggaagt gcaagcatta atagcagggg ctaatatggc
1741 aacccaaga agggcagtag ttgggtggga tattaatcga ttggctatga tcattgcggt
1801 gctaaatgct cgttgcaaaa tgtttttgca tgataaagag gtatacctaa acattgcagg
1861 gggactcaaa atacaggaac catcggtgta tcttgctgtt gctgcttccc ttatttcaag
1921 tgtagtaaat ttaccgctgc caacttcttc aataatctgc ggtgaagttg cactttcagg
1981 agaaattagg aatgtctcgc atgctgatct cagactaaaa gaagcacaaa agttaggatt
2041 caaaaaagca attatgccta aaaatggcaa ttattcttct catgatattg agataattaa
2101 gcttggtcat gtaagggaat taagagaagt ctttaattac aattaaataa tgcttcagca
2161 aattctttac tagtaaaact ccttaagtcc tctatatatt cgccaattcc tatagcatgt
2221 aactttacct tataagcttc tgcaagtcca attactactc cgcccttagc ggtgccatct
2281 agctttgtta cgattagccc ggtaacatgg accatcttac taaatgcctc taattggcta
2341 taagcatttt ggccggtagt tgcgtcaaga actaaaataa cgtcatgagg ggcagtatca
2401 tccaatttct ttatcggtct atatattttt gataactcct ccataagggt cacattattt
2461 tgcagccttc ctgctgtgtc aattagaaca acatcaacgt tatcttttat agcttgactt
2521 acagctctat atgccacact tgcagagtcg ctaccgtact ctccagtaac aatcaagcaa
2581 tcagaacgtt ctgcccaaat gtttaactgc tcaactagcag cagctctaaa tgtgtcacac
2641 gcaacaagca taacggattt tcccatctcc ttatatttat atgcaagctt acctatagtc
2701 gtggttttac cattaccgtt tactccgcac accattatta tatgtggttt tttatttaaa
2761 attaacggct gtacaactgg gctcaatata gcttctattt cgttcattaa ctgctgcgag
2821 ataataattat gttcaacttc cttgtcaaac ttgatgcttg tgagcctatc gataatcaac
2881 ttagaagttt tatgaccaat gtccatgcta attagcaatt cctctaattc atctaaaagc
2941 gactgatcta attttttttt gccagaaaaa atacttttca ccccgctcgt aaagcgagaa
3001 gaagttttta acaagccttt ataaaggtta ctaaacaacac tcaagggaat actccttttt
3061 aaattataaa cttaatgaca acatagagac gctgattgta aagaaataca cgtattatgt
3121 gtatttgtaa agttaaacaa tcgtttttac ggaattttga agtaaaaaat cacgtaaaac
3181 gattgttttc ctttagtttt taacctaaat atgttataat gtaaaatagc agtttatagg
3241 taatttttat agttataatg agaaaatttt agatcattat gaaaatccaa ggaatgttgg
3301 ctctctggat aaaaatgatc caaatgttgg tactggttta gttggtgcac catcgtgcgg
3361 tgatgtaatg aaattgcaga taaagggtcaa tgacaaagggt gttattgaag atgcaaaatt
3421 taaaactttt ggttgtggtt ctgccattgc ttcaagttcc ttgttaacag agatgataaa

```

|      |            |             |             |             |             |             |
|------|------------|-------------|-------------|-------------|-------------|-------------|
| 3481 | gggaagaacc | atcagtgcgc  | ttacacagat  | aaagaatact  | caaatagtgg  | aagagttgtc  |
| 3541 | tttacctcca | gtgaagatac  | actgttcggg  | acttgctgaa  | gatgctataa  | aggctgctat  |
| 3601 | tcatgattat | caaagtaagc  | aaaagaatta  | agaagcatga  | gtgaatatca  | agaagtaggc  |
| 3661 | ggaggtgaaa | ctgtaaaaaa  | gaatagaaaa  | cttatcacta  | taactgcgaa  | agcagtagaa  |
| 3721 | aggataaggt | atattattgga | ccaaaagaag  | catactaacc  | ttgagaaaacc | ggaagaagca  |
| 3781 | ataggaataa | gagtgctaata | taagcaaaaa  | ggatgttctg  | gtttaaaaata | tgatattgaa  |
| 3841 | tatgcgtatg | atactcgtcc  | tttagagtcg  | ataattgagg  | aaaactgcag  | tgatgaccaa  |
| 3901 | aaagttaaag | tggtgatcga  | tccaaaatcc  | gtcatgttta  | ttcttggtct  | tgaaatggat  |
| 3961 | tatgtagaag | aaaaattttc  | atcgggtttt  | gttttcacaaa | atcctaataga | gaaaggaaaa  |
| 4021 | tggtggtgtg | gagagagttt  | tcatgtctag  | cagctatttt  | acattgtttg  | aaattgaacc  |
| 4081 | aactttcaat | atcagctttg  | atgagttaga  | gaaaaaatat  | attgagctaa  | gcaaaactga  |
| 4141 | tataaatgaa | agacagtccc  | aaaacatgga  | aaatattaac  | agagcttatc  | agatactaaa  |
| 4201 | gtcaccgcta | aaacgtgccg  | agcatttgct  | agattttttt  | gatgtgaaaa  | gccaaaagga  |
| 4261 | ccacttaaat | tctgaaatat  | taagtgaatc  | aatggaaata  | agagaatat   | tgctggactg  |
| 4321 | cgatgattta | caatttgcaa  | gcaggatgat  | tgatgaaaaa  | ataaaaagatt | gcgttaaaaa  |
| 4381 | cctaattaac | acttttgcta  | taaagaat    | tgatggagct  | gctacacaag  | tcttaagatt  |
| 4441 | gaaatattta | tataagtcata | ttgaggaggt  | gaaaaagaat  | gcaaccaatt  | caaatttctg  |
| 4501 | aaccaaattc | aagtgaagta  | atttttggta  | tagatcttgg  | tactaccaat  | tctttgattg  |
| 4561 | ctatggtaaa | taaagctggt  | aacgtggaga  | tatttgaaga  | tgaacaagga  | agagaactgc  |
| 4621 | tgcttctctg | tctttcatat  | gaaaataata  | cattaaaaac  | tggtctacgat | gtcgtgcaaa  |
| 4681 | atgcaatcta | ctcaataaag  | cgtttaattg  | gtaaaagtgt  | tgaagaatta  | aataaagaag  |
| 4741 | gcgtcaat   | tgaaatagat  | catgaaagcg  | aaaaagttat  | tagaataaaa  | tgcgagaggg  |
| 4801 | aaaagtatct | tactcctggt  | gagatttctg  | ctgagatatt  | aaaagcttta  | tgtgagaggg  |
| 4861 | taaaaaagtc | taagggactg  | gaagtaaaaa  | aagcagtgat  | tactgtgcc   | gcttactttg  |
| 4921 | acgattcagc | acgtaacgca  | actaaatatg  | cggcaaaatt  | agctggaata  | gaagttcttc  |
| 4981 | gcctcggtta | cgagccaacc  | gctgcagcgc  | ttcttactc   | cattgaaaag  | aacaatagca  |
| 5041 | gtggaatata | tgcatgttat  | gaccttggtg  | gcggaacggt  | cgatatttcg  | atattgaaat  |
| 5101 | tgcatcaagg | agtgtttcaa  | gttcttgtag  | ttggtggtga  | caccaaactc  | ggcgggtgatg |
| 5161 | attttgatca | tttgctgagt  | tcaattgtga  | ttgataagta  | tagagaaaag  | acggccaagc  |
| 5221 | aactaaattc | cttacttatc  | gaatcacgct  | ctgtgaagga  | atatctgagc  | aaaaacacct  |
| 5281 | caggcatttt | tgaattcagc  | attaacggca  | agccatttga  | atgtgaaatt  | accagagaag  |
| 5341 | aattcgagca | ggcaatcagt  | tctttgggtca | ataagactat  | caatatagtc  | actcgtacta  |
| 5401 | taagcgacat | agatctttaa  | attgataata  | taaaaggagt  | aatttttagtt | ggtggtgcaa  |
| 5461 | ctagaacacc | attgggtcaa  | aattcactag  | tcaaaactct  | tggaataaaa  | gtgctgaatg  |
| 5521 | acgtggatcc | agataaagca  | gttgccattg  | gggcagctct  | gcaagctcat  | gatttaactt  |
| 5581 | cgagctcaaa | agataggaat  | attctcctgg  | atgttctacc  | tttatcactt  | ggcatagaaa  |
| 5641 | ctatgggagg | catagttgaa  | aaaatcatac  | caagaaaatac | gccactacca  | gtttcagaaa  |
| 5701 | caaaagagtt | tacaacttat  | tttgatgggc  | aaacagcaat  | gaaaattcac  | gtttgtcagg  |
| 5761 | gagaacgtga | aatgatagag  | gataacaaat  | ctctagcgca  | gtttgaacta  | aaaggtatac  |
| 5821 | cgccactacc | tgtaggttct  | gcaagagttg  | aaatagaatt  | tacagttaac  | gttgacggaa  |
| 5881 | tcttgactgt | tactgcaaga  | gaaaaaacta  | ctggaatcga  | gcagacagtt  | gaagtaaat   |
| 5941 | caagtttttg | cttgagtga   | gctgatgttc  | aaaatatggt  | taaccagtca  | ataaacagct  |
| 6001 | ttgatgaaga | tatgaaggct  | cgttcccttg  | caggcgctaa  | aattaatgga  | aataaactca  |
| 6061 | tacacttggt | tgaaaacaat  | aataaccttt  | ccactgatca  | aaagttgaaa  | aacctattac  |
| 6121 | aaaatgcaaa | aaacgcttta  | caaggcaatg  | acttgaatga  | aattaacaac  | actatcgccg  |
| 6181 | agttagaaaa | ttcttcttta  | gagttgtgtg  | aattaacaaa  | taggtagaaa  | aagcttacac  |
| 6241 | aaccttggtc | aataccctat  | ttaatctcaa  | agcaacaggt  | aacctgaaat  | taaatggtaa  |
| 6301 | ccaatcgacc | ttccccagtt  | taaacgataa  | accaactata  | cttacacgcc  | caatgatatt  |
| 6361 | ttccattggt | acaaaaccaa  | cttcaggaaa  | cctgctatcc  | aaagaattat  | ttctattgtc  |
| 6421 | tcccataacg | aaaaattgat  | cgttaggtac  | ataataaacc  | ggagtgttat  | atgatagctt  |
| 6481 | attagaaatg | tcatctacca  | aaatctcatg  | ttccttgcca  | cttaaaagcg  | tttctatata  |
| 6541 | tcttggtatg | ttacgatttg  | actcataatc  | aaaaaaaact  | tcaatttgcc  | ttcgctctac  |
| 6601 | tttctgatca | tttaggtata  | attctccctc  | tatcatattg  | actttgtcac  | ctggtgttcc  |
| 6661 | tattactcgc | ttaacaaacc  | tgatgctgtc  | atcttctgtg  | ggtttgaaaa  | ctactatgtc  |
| 6721 | gccacgcttt | ggaggggtat  | aaaaaatcct  | gccgctaaaa  | atgtttggag  | aaaatggaaa  |
| 6781 | tgagtgttta | ctgtaaccgt  | atgaatat    | actagtaaaa  | atgtaatccc  | cttcaagtag  |
| 6841 | ggtgcttttc | attgaaccag  | aaggtatatg  | aatggctcgc  | aataaaaaac  | tacgtattga  |
| 6901 | cagcgcaatc | aacagtaaaa  | aaaacaatga  | agataaaaaat | cttcccgttc  | ttatcaccca  |
| 6961 | gtttttgctt | agttcttcca  | actttgtttt  | tcttatagat  | taagcttatt  | ataatacata  |
| 7021 | aattaaaaaa | tggtaatatg  | aaattttact  | tgtgaatggt  | attcctctat  | tcaaaacgat  |

```

7081 tttgaaaagg cggttcat ttttcaacgg tgtcatccaa gtagcgtgac acataactgt
7141 acgaacattg caatttgcag gtggcagatg aaagtagctg atgcacatct gtacgaacat
7201 ttgcttttgt taaggtaata tgggtgttatg aaagtagctg acactggaat ggctttgttg
7261 catcgctact tatgaaaggc taactatagt taggattata agcaacttat tgaaaaatctt
7321 gtttttttgc aatcaatctg atcaaattta agaatagtaa tttgttattt atattaataa
7381 atttaattct attgaaaata gctaaagcat tgaaattctt gaatttttagc cggattggta
7441 aatggtagtg aaatttcttt tactcaaatt taggtattca ttgaccgttc ttgttataaa
7501 taccagaata ataagcta atgattccct atctttttta tctttaatcc atcatagcta
7561 gcgatgcaac aaagccact ggaatccagg ttgtaaccgt tcacggattg tgagaatgaa
7621 taaagaacta agcagtcgta acttttggaa gggattttgg ccattgagac gtgatgtcaa
7681 aaatatcgac aacattcttt ccacaaatct ttctccatgt tccgaccagg tgaaaaagct
7741 gttttttacga tagccgtcta atttgccgtt ctgcaagggt gttgattgac ttcaggcttt
7801 cgtaaaaact tccacaccat atcctcggcc ttaacatctt aatggccatt ctcaaaccat
7861 ttacaagcct tgtcatttca tgccccccc tttttgcatt agttgtgtag catcttttaa
7921 tattagcaag gcctataata gtgcaacact gccttacgta ttgccaatcc aaattctact
7981 tgctgtaaaa taacacaatc tgctacatcg ctgctaactc caatccctct atttattggc
8041 cctgggtgca taacaatcgc atctgggttt gcgtatgata gcttttgtaa atcaagtcca
8101 tacaatgaa aatattcttt ctctgaagaa ctattattca tgcgctcttt ctgcaatctc
8161 aaaagcataa ttacgtcagc atcctttata cttcaatta atgaataatg gactgaatct
8221 acttcaggaa aatgcttaca aatcaaagtt ggtggtgcca ccaagtttat ctctgctcca
8281 aacattttta gcaatcttat atttgatctt gcaactctac tgtgcagaat atctccacat
8341 atcacaactt tgaggctcct tatttgcttt ttgtgattgc tgattacaag atagtctgca
8401 agagcttgag ttggatgttc actacttcca tcgcctgcat tgattagcga gcagttaaca
8461 tactttgccg gtgtattaat gataccacta cttttatgcc tgattattat gtaatcagga
8521 ttcattgcat ttaatgtttt gatcatgtct tttagatctt ctcccttggt aatagaagaa
8581 gatcttattg gcaaagttac aacatttgct ccaaggcttt ttgctgctat ttcaaaagac
8641 gcaagtgtac gcgttgaatc ttcaaagaat aaatttatta ctgtcttatt ttccaagata
8701 tgactatttg caacttcttt ttttaaggta tggttgacca acttagttat attttctaca
8761 tcatcgactg taaggctctga gatgtttaac aaattccttc tcttgttcat aatttccttt
8821 taacatgcaa ttgttatcca actacttgaa ccaattctac tttcttatta tcgtttttca
8881 atagacctct tgtgcagcaa ttgttttggt ggaagaacgg aaaaagatag taaagtcaaa
8941 attaaagttg aaggaagaaa aagttcagca agttaagagt aaggtaacat agcataaatc
9001 tttcatccca atgttttagtg gcaactggaga ttacttccac ttacactcat ccgctatcat
9061 aacagcctca aaaagatgct tctcaagttc acttagaggc aaatcacttt gtgaataatt
9121 tccccaaagt ttttagtatat cggaagtttc aacgccttca ataataggat attcttggtt
9181 ttttttagcg tataactctt gagcctgctt gcttactaaa aattccaata agactatagc
9241 attttccctg ttttttgctt tttttgttac tgctgcacca ctgatgttta ccattacacc
9301 gtgatcgttg cgattaggaa aaaaagcccc tagcttgtct gcaacattct ttttattttc
9361 tgatgaaaga attctcgcaa agtagtagct gtttactatt gcaacatctc cctcaccgcg
9421 tgctacggcg taaatttgat cagtatcacc accacttggt tttcttgcca tattgctcac
9481 aattccgctt acccattctt tcgtcttttc aaaaccatta tttgcaatca taaaagcaat
9541 taacgatctg ttatatggac ttgtagaaga acgcactaat atttttcctt tccatttttc
9601 atttgctaaa tcttcataag tacttaagtc cttagggctt actgactctt tattgtaaac
9661 caatatccta gctctttttg taagaccaa ccaataatct tcaactgtct taaatcttgc
9721 aggtataaca ctttttaaaa cctctgaatc tacttgagat aaaagtcctc ttttttttgc
9781 tagaattaag ttgattgcat cagcagtc aaataagtca gcttcaccac cgttttccat
9841 tcgtgaaagt agctgagaat aatcatcaat gatgtaacgt actttaatac ctgtattttt
9901 cgtgaattca tcaaacaaag tacgtactaa ttcttctttg cgcatgaat aaacatttac
9961 cacttgtgag tcattagttc cgtcgtttct gtataaataa gtaataacta tcaatataat
10021 tgctattaag gatgtgaata taaaggcttt tttcatattg gataaaaaat aacttctttc
10081 agttaagtt accaagatgg tacaacttta gcaagtgtaa agttcgttag ataaatcata
10141 aaaacttctt tgacaagctt cgccagcccc cttattataa cactgaagct atttatttat
10201 cttecgcaatc tctgcagtgg attaatgaca aaaaacttaa tgtatttggc gtaaatcatg
10261 cttaattttt tgcattatgt gcaccttatg tctttataaa atttctaggt ttttacctaa
10321 tataagctga aatgcgctat ttaaaacatt aaaaaacgcc aacttaaaaa atggatagtg
10381 aataactagc taccctaggg tttcttttgc ctttttttct gtt

```

//

LOCUS JAQZAU010000064 8664 bp dna linear ENV 17-MAR-2023  
DEFINITION MAG: Wolbachia pipientis isolate wEsol contig\_37626, whole genome  
shotgun sequence.

ACCESSION JAQZAU010000064 JAQZAU010000000  
 VERSION JAQZAU010000064.1  
 DBLINK BioProject: PRJNA929258  
 BioSample: SAMN33142973  
 KEYWORDS WGS; ENV; Metagenome Assembled Genome; MAG.  
 SOURCE Wolbachia pipientis (insect metagenome)  
 ORGANISM Wolbachia pipientis  
 Bacteria; Pseudomonadota; Alphaproteobacteria; Rickettsiales;  
 Anaplasmataceae; Wolbachieae; Wolbachia.  
 REFERENCE 1 (bases 1 to 8664)  
 AUTHORS Fiutek,N., Couger,B.M., Roy,S., de la Torre,J.R. and Connor,E.F.  
 TITLE Genomic assessment of the contribution of the Wolbachia  
 endosymbiont of Eurosta solidaginis to gall-induction  
 JOURNAL International Journal Molecular Sciences  
 REFERENCE 2 (bases 1 to 8664)  
 AUTHORS Fiutek,N., Couger,B.M., Roy,S., de la Torre,J.R. and Connor,E.F.  
 TITLE Direct Submission  
 JOURNAL Submitted (10-FEB-2023) Biology, San Francisco State University,  
 1600 Holloway Ave, San Francisco, CA 94132, USA  
 COMMENT ##Genome-Assembly-Data-START##  
 Assembly Date :: JUN-2019  
 Assembly Method :: FLYE v. 06-2019  
 Genome Representation :: Full  
 Expected Final Version :: Yes  
 Genome Coverage :: 100.0x  
 Sequencing Technology :: Illumina HiSeq; PacBio Sequel  
 ##Genome-Assembly-Data-END##  
 FEATURES Location/Qualifiers  
 source 1..8664  
 /organism="Wolbachia pipientis"  
 /mol\_type="genomic DNA"  
 /submitter\_seqid="contig\_37626"  
 /isolate="wEsol"  
 /isolation\_source="galls on Solidago altissima"  
 /host="Eurosta solidaginis MN-2018-EFC"  
 /db\_xref="taxon:955"  
 /environmental\_sample  
 /country="USA: Cowling Arboretum, Carleton College,  
 Northfield, MN"  
 /lat\_lon="44.48 N 93.13 W"  
 /altitude="280 m"  
 /collection\_date="2018-11"  
 /metagenome\_source="insect metagenome"  
 /note="metagenomic"  
 gene <1..2953  
 /locus\_tag="wEsol\_00680"  
 CDS <1..2953  
 /locus\_tag="wEsol\_00680"  
 /codon\_start=1  
 /transl\_table=11  
 /product="hypothetical protein"  
 /pfam="Pfam-B\_2381 NB-ARC TPR\_12 Pfam-B\_7784 TPR\_10  
 Pfam-B\_19818 Pfam-B\_2142 TPR\_12 TPR\_10 TPR\_11 TPR\_2 TPR\_8  
 TPR\_1 Pfam-B\_1978 TPR\_7 TPR\_14 Pfam-B\_7784 TPR\_10 TPR\_11  
 TPR\_1 TPR\_8 TPR\_2 TPR\_7 Pfam-B\_17261 Pfam-B\_422 TPR\_12  
 Pfam-B\_2643 TPR\_12 TPR\_10 TPR\_1 TPR\_2 TPR\_7 TPR\_12  
 Pfam-B\_19818 TPR\_10 TPR\_11 TPR\_2 TPR\_7 TPR\_8 TPR\_14  
 TPR\_10 TPR\_8"  
 /translation="ENKQSEVLSNRTFKKRDGTSTGDHGRKYEVKLLMLYLLHGLSSK  
 IDFWLASNIEGFGAFDDIFFEYKDQKNKSRIILVQAKHCNTHRSSKNITFEDLFIDGN

```

DRKQQKEDFGLNKYFESHPEIKQNPECKNSDITLVIHTNVNVNLKKGTEKQGSVETLE
KYLEESKLTNDNTLNIYEGQKGTCTYKIKNHTLKKYFSCGSDDEIEDFLLRIRFVVDQ
PNHSLDDIIEKEIGNIYKISGEEDIDTVFVRVYDKVGKWWAQQGSVSYLTRKDDYF
REVIEHLYSLKPREDLFRWNIPPKIASGNFIERYLNEEIVNHLKTKNEPVILTALY
GLGGVGKTQSVLDFIQKHGKEYKAICWFNAKDEDQLLSEYVNLGRKLNIIHDEDNISI
AQRAYYVKNWLEDKREGWLLIYDNVSNEYEVISKLRPTKGGKIIVTSRNTWPQGSIG
VDVFTPESELYVKKILQVSESDRPNIGILAEKLGRLPLALAAQACAYIKENKMTISR
YLEIYAERKLYLLSHKTLPKDSNHEPVFITWDITMDAIRNESKLASKLLVACAYLDND
IPKDLLRIFPEIVENNSEKPFEEVLGILLRYSMLVSNEQSSSVSIHCLVQDVIRLKS
KESGKIKDKITVFQLLKESFPDDSDKLEDYAKKRQLLPHLEAFLSHIDNWLAKNPSE
KQTIEKDYLVIYLLIWMNDGYHDLGNPRRQKELLEQALSIFKKYYGPYNFQVAIALANL
GIAYGDLGNHRRQKELLQALPILEKHYGSDHFQVAIILTNLNSNAYGGLGNPQKAKEL
LERALAIQEEHYGPDHSQVAVILTNLGIIYGNLGNYYEKKELLERALAIQEKHYEPDH
SQVASTLVGLGTSYRALGDSQKAKELLGRALAIQEKHYGSDHFQVAITLTNLNSNAHGD
LGNLQKAKELLERALPIFEKHYGPDHLEVAKLLANLSITYGDLGNPQKAKELLEQASF
ILEKHHVHDYF"
/besthit="qcoverage 75.5849440488301 , hcoverage
83.5770528683915 , similarity 100 , identity 100 , eval
0.0 , alnlength 743 , Bacteria , Proteobacteria ,
WP_174516902.1 tetratricopeptide repeat protein
[Wolbachia endosymbiont of Cardiocondyla obscurior]"
gene 2934..3116
/locus_tag="wEsol_00681"
CDS 2934..3116
/locus_tag="wEsol_00681"
/codon_start=1
/transl_table=11
/pfam="TPR_12"
/fullproduct="qcoverage 96.6666666666667 , hcoverage 100
, similarity 100 , identity 100 , eval 8.01e-35 ,
alnlength 58 , Bacteria , Proteobacteria , WP_141457140.1
MULTISPECIES: tetratricopeptide repeat protein
[unclassified Wolbachia]"
/translation="MSMITSKVVELWEILGPAYGALGNHKKQKELFARASSIFKKHYG
PDHPEVAKLLAELDDI"
/product="tetratricopeptide
repeat protein"
/besthit="qcoverage 96.6666666666667 , hcoverage 100 ,
similarity 100 , identity 100 , eval 8.01e-35 ,
alnlength 58 , Bacteria , Proteobacteria , WP_141457140.1
MULTISPECIES: tetratricopeptide repeat protein
[unclassified Wolbachia]"
gene complement(3155..4327)
/locus_tag="wEsol_00682"
CDS complement(3155..4327)
/locus_tag="wEsol_00682"
/codon_start=1
/transl_table=11
/fullproduct="qcoverage 100 , hcoverage 100 , similarity
100 , identity 100 , eval 2.54e-263 , alnlength 390 ,
Bacteria , Proteobacteria , WP_015589060.1 MULTISPECIES:
2-oxoglutarate dehydrogenase complex
dihydrolipoyllysine-residue succinyltransferase
[unclassified Wolbachia]"
/cog="AceF COG0508 404 Pyruvate/2-oxoglutarate
dehydrogenase complex, dihydrolipoamide acyltransferase
(E2) component, and related enzymes"
/pfam="Biotin_lipoyl Biotin_lipoyl_2 E3_binding
2-oxoacid_dh"
/tigr="TIGR01347 sucB 404 dihydrolipoyllysine-residue

```

```

succinyltransferase, E2 component of oxoglutarate
dehydrogenase (succinyl-transferring) complex"
/product="2-oxoglutarate
dehydrogenase complex dihydrolipoyllysine-residue
succinyltransferase"
/translation="MSKIIEIRAPKTLGGESVTEGIVKIKKGIGEAVKVDDLIFEIET
DKTALELTAEASGQITEFLVKEDDVISPDQLLAKLSVGEVKEEARKEDKSESAAKKDA
PSARKIMEENAI SAESVKG TGMGGRITKADVIGHMNKAEQPAIKQYELPKSVSGEQR
EERVKMSKIRQVIAARLKASQNTAAILTTFNEIDMKNVMDLRACYKDAFEKKYGIKLG
FMSFFIKA AVQALKEIAEINAEISGDEIIYKHYYDVGAVGTDKGLVVPVIRGADQMS
FAEIELTLVALGKKAREGKLQVSEMEGATFTISNGGVYGSLLSTPIINPPQSGILGMH
SIQNRPVAMGNSIEIRPMYIALSYDHRIVDGKGA VTFVLVKIKNYIEDPNRLVLEV"
/besthit="qcoverage 100 , hcoverage 100 , similarity 100
, identity 100 , evalue 2.54e-263 , alnlength 390 ,
Bacteria , Proteobacteria , WP_015589060.1 MULTISPECIES:
2-oxoglutarate dehydrogenase complex
dihydrolipoyllysine-residue succinyltransferase
[unclassified Wolbachia]"
gene 5364..6242
/locus_tag="wEsol_00683"
CDS 5364..6242
/locus_tag="wEsol_00683"
/codon_start=1
/transl_table=11
/fullproduct="qcoverage 100 , hcoverage 100 , similarity
100 , identity 100 , evalue 2.74e-204 , alnlength 292 ,
Bacteria , Proteobacteria , WP_015589059.1 MULTISPECIES:
hydroxymethylbilane synthase [unclassified Wolbachia]"
/cog="HemC COG0181 307 Porphobilinogen deaminase"
/pfam="Porphobil_deam Porphobil_deamC"
/tigr="TIGR00212 hemC 293 porphobilinogen deaminase"
/product="
hydroxymethylbilane synthase"
/translation="MPVKIGTRGSKLAVAQALEAKQKLLDSFPNLSIEIVKIKTSGDK
YANANLAEIGGKGLFIKEIETELLENNIDMAVHSLKDMPAFFSGGLTIPCVLERLSSC
DAFISHKHNSLES LPQQATIATSSIRRKVQLLNVRPDLNIVPLRGNVTTRLQNQSF DG
IILAEAGLIRLEKHHLLITEVLPPKVMLS AVGQGAVCIQCRNDVKIINLLEKINNMS
FIGVKSESRFMKTVNGSCFTPLAALAEYVSENMLHLRCMLASGKNIFYTERTSFIEDA
EKMGM DAGLELKSCL"
/besthit="qcoverage 100 , hcoverage 100 , similarity 100
, identity 100 , evalue 2.74e-204 , alnlength 292 ,
Bacteria , Proteobacteria , WP_015589059.1 MULTISPECIES:
hydroxymethylbilane synthase [unclassified Wolbachia]"
gene 6233..7120
/locus_tag="wEsol_00684"
CDS 6233..7120
/locus_tag="wEsol_00684"
/codon_start=1
/transl_table=11
/fullproduct="qcoverage 100 , hcoverage 100 , similarity
100 , identity 100 , evalue 1.17e-211 , alnlength 295 ,
Bacteria , Proteobacteria , WP_141457145.1 MULTISPECIES:
UDP-N-acetylmuramate dehydrogenase [unclassified
Wolbachia]"
/cog="MurB COG0812 291 UDP-N-acetylmuramate
dehydrogenase"
/pfam="FAD_binding_4 MurB_C"
/tigr="TIGR00179 murB 290
UDP-N-acetylenolpyruvoylglucosamine reductase"
/product="

```

UDP-N-acetylmuramate dehydrogenase"  
 /translation="MLISLPKVRGIYRYDVLMSKATWLVNNGRADVLFKPCDIEDLTY  
 LIKNTLFPVSVIGATSNIIVRDSGIRGITVKLGKEFAYIKSKGNNSIVAGGAVLLSNL  
 AHFAGNQQISGLEFLVGIPGTVGGGIEMNAGAYGSDIASVVQSIKAVNLEDGNLYEFS  
 SEEMGYFYRGHSLKGNWIFVEAEFKGINSEYELILQRLKEVIERKNKSQPIRGKTAGC  
 IFKNPKNYRAWELIDKSGCLGLNIGGARISKKHCNLLNYDNATASDLENLGNKVKA  
 VKDKFNVELEWEIRVLGSY"  
 /besthit="qcoverage 100 , hcoverage 100 , similarity 100  
 , identity 100 , evalue 1.17e-211 , alnlength 295 ,  
 Bacteria , Proteobacteria , WP\_141457145.1 MULTISPECIES:  
 UDP-N-acetylmuramate dehydrogenase [unclassified  
 Wolbachia]"  
 complement(7523..8455)  
 /locus\_tag="wEsol\_00685"  
 complement(7523..8455)  
 /locus\_tag="wEsol\_00685"  
 /codon\_start=1  
 /transl\_table=11  
 /fullproduct="qcoverage 100 , hcoverage 100 , similarity  
 100 , identity 100 , evalue 3.60e-193 , alnlength 310 ,  
 Bacteria , Proteobacteria , WP\_015589057.1 MULTISPECIES:  
 Rpn family recombination-promoting nuclease/putative  
 transposase [unclassified Wolbachia]"  
 /pfam="PDDEXK\_2 Pfam-B\_9730 Pfam-B\_12519 Pfam-B\_10245"  
 /tigr="TIGR01784 T\_den\_put\_tspse 273 conserved  
 hypothetical protein"  
 /product="Rpn family  
 recombination-promoting nuclease/putative transposase"  
 /translation="MALSKFLDPKLDLTFKKIFGTEKNKNILIHFLNDILGFTEINTI  
 QEVEFLSTIMDPEIASDKQSIVDVLCDSSGARYVIEMQLTRDKGFQKRAQLYAAKAY  
 SRQADKSGKYIDLKKVFFIAISNCNLFDPKLDYISSHTIRDEKTNEHDLKDFQFVFIE  
 LPKFPKNKEEQLESIVDRWLFFFKYADETTEEDLRKIAEKAPIIKLAYDELDRFSWNE  
 KDLVAYEERIMDLRKEEAILEYRLDLATEKGIQIGEERGIKIGKEEGKIEGKIEGKIE  
 VAKAMLANNVDVNTIVKFTGLSISEIEELSVNGY"  
 /besthit="qcoverage 100 , hcoverage 100 , similarity 100  
 , identity 100 , evalue 3.60e-193 , alnlength 310 ,  
 Bacteria , Proteobacteria , WP\_015589057.1 MULTISPECIES:  
 Rpn family recombination-promoting nuclease/putative  
 transposase [unclassified Wolbachia]"

# ORIGIN

```

1 agaaaacaaa cagtctgaag tacttagtaa tcgtacattt aagaagagag atggcacatc
61 aacaggtgat catggctgca agtatgaagt aaaattatta atgctgtatc tacttcatgg
121 gttaagtagt aaaattgact tttggttagc atcaaacata gaagggttttg gagcctttga
181 tgatattttt tttgagtata aagatcagaa gaacaaatcg agaattatct tggttcaagc
241 taagcactgc aatacacatc gctcttcgaa gaatattact tttgaagatt tgtttattga
301 tggaaatgat agaaagcaac agaaagaaga tttcgggtta aacaaatatt ttgaatctca
361 tcctgagatt aagcaaaacc ctgagtgtaa gaacagtgat attacgcttg tcattcatac
421 taatgtcaat gtgaacctaa aaaaaggtag agagaagcaa ggaagcgtag aaacattaga
481 gaagtatctg gaagagtcaa agttaacaaa tgataacact ttaaataatt atgaagggtca
541 aaaaggaacg tgctacaaaa taaaaaatca tactgaactg aaaaaatact tcagttgtgg
601 tagtgacgat gaaatagaag attttttact tagaataagg tttgtagttg atcaacctaa
661 tcattcaaaa ttagatgata ttattaagaa agaaataggg aatatataca aaatatcagg
721 ggaagaagat attgatacag tttttgtccg tgtatatgat aaggtaggga aatggtagggc
781 acaacagggt agcaaagttt cttatctaac aagaaaagac gattatttta ggggaagttat
841 agaacatctt tatagtctca aacctagaga agatctattt gaacggtgga acattccacc
901 taaaatagct agtggaaatt tcattgaacg agaatatctc aatgaagaaa tagtaaataca
961 tctaaagaca aaaaatgagc cagttatatt aactgctttg tacgggttag gtggagtagg
1021 taaaacacag tcagtgtctag attttattca aaaacatggg aaagaatata aggcaatatg
1081 ttggtttaat gcaaaagatg aagatcaact actcagttaa tatgttaatt taggaagaaa
1141 attaaatatt attcacgatg aagacaacat ttctattgca cagcgagctt attatgtgaa

```

|      |            |             |             |             |             |            |
|------|------------|-------------|-------------|-------------|-------------|------------|
| 1201 | aaactggcta | gaagattcta  | aacgtgaagg  | ctggttggtg  | atttatgata  | atgtatcaaa |
| 1261 | ttatgaagtc | atcttctaagc | tcagacctac  | aaaaggcggc  | aaaataatag  | ttacgtctcg |
| 1321 | taatactgaa | tggccacaag  | ggagtatagg  | tgtagacgtt  | tttactcccc  | cagaatcaga |
| 1381 | attatatgtt | aagaaaattc  | taggccaggt  | ttcagaaagc  | gataggccaa  | atataggtat |
| 1441 | attggcagaa | aagtttaggta | gattaccttt  | ggcatttagct | caggcttgcg  | cttacatcaa |
| 1501 | agaaaacaaa | atgactatct  | cacgttactt  | agaaatttat  | gcagaaagga  | agctttatct |
| 1561 | attatctcat | aaaacactac  | ctaaggattc  | taaccatgag  | cctgtgttta  | ttacttggga |
| 1621 | tattacaatg | gacgcaattc  | gtaatgagtc  | taaactagca  | agcaagttgt  | tagtagcttg |
| 1681 | tgcataattt | gacaatgata  | ttcctaaaga  | tttgtttaaga | atatttcctg  | agattgtaga |
| 1741 | gaacaattct | gaagaaaaac  | cttttgaaga  | agtattaggt  | atattattga  | gatattcgat |
| 1801 | gctagtgtcc | aatgagcaga  | gtagtagtgt  | ttctattcac  | tgtttagtac  | aagatgtaat |
| 1861 | taggctaaag | tcaaaggaaa  | gtggaaaaat  | taaaaaagat  | ataaaaaccg  | tttttcaatt |
| 1921 | attaaaagaa | agcttccctg  | acgacagtga  | taaattagaa  | gattatgcta  | agaagcgaca |
| 1981 | attattgccg | cacttagaag  | cgttttttatc | acatatagat  | aattggctag  | caaaaaatcc |
| 2041 | ttcagaaaaa | caaacaatag  | aaaaggatta  | tcttgtgtat  | ttgttaatat  | ggatgaacga |
| 2101 | tggataccat | gacttgggta  | atcccagaag  | acaaaaggag  | ctgcttgaac  | aggctttatc |
| 2161 | tatctttaag | aaatattatg  | ggccttataa  | ttttcaagtt  | gctatagcgc  | tggcaaactc |
| 2221 | aggtatcgct | tatggggatc  | tgggtaatca  | taggagacaa  | aaggagttac  | ttaaacaggc |
| 2281 | tttacctatt | cttgagaaac  | attatggctc  | tgaccatttc  | cagggttgcta | ttatactgac |
| 2341 | aaacctaagc | aacgcttatg  | ggggtctggg  | taaccctcag  | aaagcaaaag  | agttacttga |
| 2401 | acgggctcta | gcaattcaag  | aggaacatta  | tgggcctgat  | cattcccaag  | ttgctgttat |
| 2461 | attgacaaac | ctcggtatca  | tttatgggaa  | tttaggtaac  | tatgaagaaa  | aaaaggagtt |
| 2521 | gcttgaacgg | gcttttagcaa | ttcaagagaa  | acattatgag  | cctgatcatt  | ccaagttgc  |
| 2581 | tagcacatta | gtaggtctag  | gtacctctta  | tagagcttta  | ggtgattctc  | agaaagcaaa |
| 2641 | agagttactt | ggacgggctt  | tagcaattca  | agagaaacat  | tatggctccg  | atcatttcca |
| 2701 | agttgctatc | acattgacaa  | acctaagtaa  | cgctcatgga  | gatttaggca  | atcttcagaa |
| 2761 | agcaaaagag | ttgcttgaac  | gggctttacc  | tatttttgag  | aaacattacg  | gtcctgatca |
| 2821 | tcttgaagtt | gctaaactat  | tggcaaacct  | aagtattacc  | tatggggatt  | taggtaacc  |
| 2881 | tcagaaagca | aaggagttgc  | ttgagcaggc  | ctcatttatt  | cttgagaagc  | atcatgtcca |
| 2941 | tgattacttc | taaagtgtgt  | gaactatggg  | aaattctagg  | ccccgcttat  | ggtgctctag |
| 3001 | gtaaccataa | gaaacaaaag  | gagttgtttg  | cacgggcttc  | atccatcttt  | aagaaacatt |
| 3061 | atggccctga | tcatccggaa  | gttgctaaac  | tgctggcaga  | actagatgac  | atcttaggtt |
| 3121 | ttagcaatac | tggattaaca  | acaattcatt  | tgagctacac  | ttccaaaact  | aatctatttg |
| 3181 | gatcttctat | ataatttttt  | attttaacga  | ggaaagtaac  | tgctcctttg  | ccgtcaacta |
| 3241 | ttctgtgatc | gtaagagagg  | gcaatgtaca  | tcataggtct  | aatctcaatt  | gagttgcccc |
| 3301 | tggcaactgg | cctgttttgt  | attgaatgca  | ttccaagtat  | tccagattgc  | ggagggttta |
| 3361 | ttatcggagt | agaaaggagc  | gaacatata   | ctccgccatt  | tgaaatggta  | aatgttgcac |
| 3421 | cttccatttc | tgatacttgt  | aattttacct  | ctcgtgcttt  | tttgccaaga  | gcaactaaag |
| 3481 | tcaactcaat | ttctgcaa    | gacatctgat  | cggcaccccg  | aataactggg  | acaacaagac |
| 3541 | ctttatcggg | gccaacagca  | acacctacgt  | catagtaatg  | tttatatatg  | atctcatcgc |
| 3601 | ctgagatttc | agcgttaatt  | tcagcaattt  | ctttcaatgc  | ttgcaccgct  | gcctttataa |
| 3661 | aaaacgacat | aaaaccaagt  | tttattccat  | attttttttc  | aaaggcgctc  | ttatattttg |
| 3721 | ctcttagatc | catgacattc  | ttcatgtcaa  | tttcattgaa  | cgtgggtcagt | attgcagcag |
| 3781 | tattttgcca | tgtcttcaaa  | cgagcggcaa  | ttacttgtct  | tattttgtct  | atctttactc |
| 3841 | gttcctctct | ttgtctctca  | cttactacac  | tttttggcaa  | ttcatattgt  | tttattgcag |
| 3901 | gttgttcagc | tttgttcata  | tggcctatca  | catctgcttt  | tgttattctg  | cctcccatgc |
| 3961 | cagttccctt | gacgctttct  | gcaactgatt  | cattttcttc  | cataatttta  | cgagctgatg |
| 4021 | gagcatcttt | tttagcagca  | ctttcgcttt  | tatcttcttt  | tctcgtctcc  | tcttttactt |
| 4081 | ctcccacgga | aagcttcgct  | aacaattgat  | cagggtcttat | tacatcatct  | tcctttacaa |
| 4141 | gaaattcagt | tatttgcccc  | gaagcttctg  | cagtttaattc | gagtgtctgt  | ttgtcagttt |
| 4201 | caattttcaa | gatcaagtca  | tctactttta  | ctgcttctcc  | aatacccttc  | tttattttta |
| 4261 | ctataccttc | tgtaactgat  | tcaccaccaa  | gagtttttgg  | tgctctgatt  | tctataatct |
| 4321 | tgctcataaa | acaacttccg  | tataaaaact  | tctatagatt  | tatacatgaa  | aagagacatg |
| 4381 | taataaaact | ataaattcat  | tgaggctctt  | atcatttaga  | agtggaccac  | aactcccaaa |
| 4441 | tgtcattcca | gcgcagccat  | aaaaattcct  | tgacaaaactc | cgccagcccc  | cttatcatga |
| 4501 | aactgaagct | atcttatttat | cttctctgta  | cagattaaat  | gacaaaaaaa  | ctcacgtatc |
| 4561 | tggcgtctca | tgtttaattt  | tttgcaactat | gtgcaactcta | tgtctttatc  | aaatttctgg |
| 4621 | gtttttacct | acacaagctg  | aaatatgctt  | ataaagcatt  | taaaacataa  | aaaaacgcca |
| 4681 | acttaaaaaa | tggatagtgga | ataactagct  | accctagggg  | ttcttttgcc  | tttttttctg |
| 4741 | tttagtaaat | ttcttaatgt  | ttataattta  | gattagttgc  | ggttttaaaag | cagctgaatc |

|      |             |             |             |            |             |             |
|------|-------------|-------------|-------------|------------|-------------|-------------|
| 4801 | gcggttatta  | agtgtttaga  | ataaaaaaac  | gccatacttg | aaagtataat  | gtaagtaatt  |
| 4861 | agccaaccac  | ggggcttctt  | ttgccttttt  | tttcgttttg | taaattttct  | aatatattatg |
| 4921 | gctaaacgac  | aatcgtcac   | ccgctacttg  | ttagcgggat | ctagagatac  | cgcgaaatgaa |
| 4981 | tcgcggtatg  | acggtatgcg  | gcggcggtgac | gataagctcg | tcaccccgct  | gcttgtagc   |
| 5041 | gggatctctt  | gttagcggct  | gagataccgc  | gattcattcg | cggtatgacg  | gttcgcggcg  |
| 5101 | gtatgacgat  | aagggtttata | ccttgctcatg | caagtactag | aatccagtaa  | gcttattttat |
| 5161 | gcatgtaaaa  | ggctattatt  | ttgtaaagtc  | aaagttgctt | ttgggttttaa | gttaaagtac  |
| 5221 | aataaatgca  | aaggctcata  | taaactggat  | ccaagtactt | gaatgacatc  | agagagaggg  |
| 5281 | taaccgaggt  | tcatgcgata  | cacgctacca  | aagtgtttaa | ataattaatt  | aggttaaggt  |
| 5341 | ttgggtattca | aacagtcgta  | cacatgccag  | tcaaaatagg | taccagagga  | agcaagcttg  |
| 5401 | cagttgcccc  | ggcttttgaa  | gcaaaacaaa  | agttgctgga | ttctttttcct | aacttatcta  |
| 5461 | ttgaaattgt  | taaaataaaa  | acttctggag  | ataagtatgc | aaacgcaaat  | cttgctgaaa  |
| 5521 | taggaggcaa  | aggattattc  | attaaagaaa  | ttgagactga | attgctcgaa  | aataatatag  |
| 5581 | acatggcagt  | tcattcgcta  | aaagatatgc  | ctgcgttttt | ctcagggggg  | ttacaattc   |
| 5641 | cttggtgtttt | agaaaggcta  | agttcatgcg  | atgcgtttat | ttctcataaa  | cacaatagcc  |
| 5701 | ttgagtcttt  | gccacagcag  | gctactattg  | ccacttcttc | aataagaaga  | aaagttcagt  |
| 5761 | tattaaatgt  | tagaccagat  | ttaaatatag  | taccgctacg | tggaaatgta  | acaaccagat  |
| 5821 | tgcaaaatca  | aagttttgat  | ggaataattc  | tagctgaagc | aggactcata  | agattagaaa  |
| 5881 | aacatcactt  | gattacagag  | gtattgccac  | caaaagttat | gttaagtgca  | gtggggcagg  |
| 5941 | ggcggttttg  | tattcaatgt  | agaaggaatg  | atgtaaaaat | tatcaatctt  | ttagagaaaa  |
| 6001 | ttaataataa  | tatgtctttt  | ataggagtga  | aatcagagcg | cagttttatg  | aagacagtga  |
| 6061 | atggttcatg  | ttttacacca  | cttgacgctt  | tggctgaata | tgtgagcgaa  | aatatgctac  |
| 6121 | accttcgttg  | tatgttagca  | agtggaaaaa  | atatatactt | cactgagcgc  | acttcattta  |
| 6181 | tagaagatgc  | ggagaaaaatg | ggtatggatg  | caggattaga | gttgaaatca  | aaatgcttat  |
| 6241 | aagcttacct  | aaagtacgtg  | gaatctatcg  | ttatgatgtc | ttaatgtcta  | aagcgacgtg  |
| 6301 | gttaaattgt  | ggtggacgag  | ctgatgtatt  | atttaaacca | tgtgatattg  | aagatttaac  |
| 6361 | atacttgatt  | aaaaatactg  | aactgccagt  | tagcgttatt | ggtgcaacat  | ccaacataat  |
| 6421 | agtgcgagat  | agtggcattc  | gaggaataac  | agtaaaatta | ggtaaggagt  | ttgcataatat |
| 6481 | taaaagtaag  | ggtaacaact  | ctattgtagc  | tgggggagct | gtgctgctca  | gcaaccttgc  |
| 6541 | tcactttgcg  | ggaaatcagc  | agattagtgg  | gttgaggttt | ctagttggaa  | ttccagggaac |
| 6601 | agttggtggc  | ggaatagaaa  | tgaatgcagg  | tgcatatggg | agtgatatcg  | caagtgttgt  |
| 6661 | acaatccata  | aaagcagtga  | atctagagga  | tggaaaccta | tatgagttct  | ccagcgaaga  |
| 6721 | aatgggggat  | ttttaccgtg  | gacatagcct  | aaaaggaaat | tggattttttg | ttgaagctga  |
| 6781 | gtttaaagga  | ataaaactcag | agtatgagct  | tatactgcaa | aggttaaagg  | aagttattga  |
| 6841 | gaggaaaaat  | aaaagccagc  | caataagagg  | aaaaactgct | gggtgcatat  | tcaaaaaatcc |
| 6901 | aaaaaactac  | cgagcatggg  | agttaattga  | taaatctggc | tgccataggg  | taaatattgg  |
| 6961 | tggagctaga  | atctctaaga  | aacattgtaa  | cttcttgctc | aattacgata  | atgcaactgc  |
| 7021 | atctgacttg  | gaaaaccttg  | gcaacaaagt  | aaaagatgca | gtaaaggata  | aatttaatgt  |
| 7081 | tgaacttgag  | tgggaaataa  | gggttttggg  | tagctattag | atagttttta  | tagcttatgt  |
| 7141 | atattcgttc  | agtagaacgg  | caaataaggt  | aaacaagtaa | tctaaaaaaa  | taatcataga  |
| 7201 | gaaaccgtga  | ggtaatgtgg  | ttaatcttgt  | agaactttgc | agaatctag   | agagaaaaat  |
| 7261 | agcaaagtta  | taccaattct  | cattattagt  | gaatcaaata | agcgatattg  | tagagttatt  |
| 7321 | taattgtgga  | gtgagaaaaga | aaggcaatag  | tatggctttt | tttccattgt  | tatctatccg  |
| 7381 | tttattgtgc  | agtgggaatt  | ggtattagct  | gaacggacac | tattgttata  | ctatatctta  |
| 7441 | tatacaattg  | tgcaatatgg  | acaatggcaa  | caaatttact | agcgaaattc  | agtgatttat  |
| 7501 | gattgataat  | taaagttctt  | aattagtaac  | cgttcacact | taattcttca  | atctcactaa  |
| 7561 | tagaaaggcc  | agtaaatttg  | acaatagtgt  | tgacatcaac | attgttagcc  | agcattgctt  |
| 7621 | ttgcgacttc  | gattttttcct | tcgatttttc  | cttcaatttt | cccttctctt  | ttaccgattt  |
| 7681 | tgatgcctct  | ttcttcgcca  | atttggatgc  | ctttttcagt | agcaaggtea  | agtctgtatt  |
| 7741 | caagaatggc  | ttcttctttc  | cgtagatcca  | ttattctttc | ttcataaget  | actaaatctt  |
| 7801 | tttcattcca  | gctaaacctg  | tctaattcat  | cgtaggctaa | ctttattatt  | ggtgcttttt  |
| 7861 | ctgctatttt  | ccttaagtct  | tcttccgtag  | tttcatctgc | atatttgaag  | aaaaataacc  |
| 7921 | aacgatccac  | tatgctttct  | agctgttctt  | ccttattctt | aggaaattta  | ggtagttcaa  |
| 7981 | taaatacaaa  | ttgaaaatct  | tttaagtcac  | gctcattggg | tttctcatct  | cttatagtgt  |
| 8041 | ggctggatat  | ataatcaagc  | ttatcaggaa  | ataaattaca | attagagata  | gcaataaaga  |
| 8101 | aaaccttctt  | taaatcaatg  | tacttaccag  | atztatcagc | ttgccttgag  | taagccttag  |
| 8161 | cagcatatag  | ttgagctcgt  | ttttcgaagc  | ctttatcgcg | agtaagctgc  | atztatcaat  |
| 8221 | catacctggc  | cccactagaa  | tccttgcaaa  | gaacatcaac | tatactttgt  | ttatcagatg  |
| 8281 | caatttcagg  | atccattata  | gtactgagga  | attccacttc | ttgtatagta  | tttatctcag  |
| 8341 | taaaccctaa  | aatatcattc  | aaaaaatgta  | tgagaatatt | cttatttttt  | tcagtgccaa  |



```

/translation="MKDKPVRQKKNLDKGLKRSVGKPACCVSKGGSSSNTASLPD"
/besthit="qcoverage 100 , hcoverage 77.3584905660377 ,
similarity 100 , identity 100 , evaluate 2.37e-19 ,
alnlength 41 , Bacteria , Proteobacteria , WP_211907584.1
hypothetical protein [Wolbachia endosymbiont of
Spodoptera picta]"
gene complement(120..1667)
/locus_tag="wEsol_00687"
CDS complement(120..1667)
/locus_tag="wEsol_00687"
/codon_start=1
/transl_table=11
/pfam="RVT_N RVT_1 GIIM"
/fullproduct="qcoverage 100 , hcoverage 100 , similarity
100 , identity 100 , evaluate 0.0 , alnlength 515 ,
Bacteria , Proteobacteria , WP_155968541.1 MULTISPECIES:
group II intron reverse transcriptase/maturase
[Wolbachia]"
/translation="MITSKPVSASTESFEAWKQLPWKKCQKVIVRLQRRIVKAVQEGR
WGKVKALQHLLTRSFSGKALAVKRV TENQGKTTAGVDRQLWSTCNAKFQGIKLLKQRG
YKPSPLKRIYISKSNKRRPLGIPTIKDRAMQALYLLALEPVAETISDRHSYGFRPKR
SCADATVACHLLLASRNQLQWILEGDIKCFDNINHEWLMKHIPMEKKILHRWLKAGF
LESKTLYPTTAGTPQGSIIISPILANFTLDGLEQLLESRFGLGSKRRGKIRSGVNVIR
YADDFIISGFTHEVLENEVKPLVSSFLHERGLILSEEKTKITSITTGFDFLGCNVRRY
NKKLIKPSKESIKRLLNKARTLIKANIAN TQAIVIKSLNSLLRGWGNYYHHVCAKKA
FRKIDNEIWHSLWKWAKKRHRPKGLRWIKNRYFKVMGQRQWVFAAPICKNKPKEIRYL
RLLKLIDIPIRRHV KIRADANPLDLKWKYFDERVKRTRMLASSFSREGSLLLVSPLK
LMYSEDL"
/product="group II intron
reverse transcriptase/maturase"
/besthit="qcoverage 100 , hcoverage 100 , similarity 100
, identity 100 , evaluate 0.0 , alnlength 515 , Bacteria ,
Proteobacteria , WP_155968541.1 MULTISPECIES: group II
intron reverse transcriptase/maturase [Wolbachia]"
gene complement(1676..1942)
/locus_tag="wEsol_00688"
CDS complement(1676..1942)
/locus_tag="wEsol_00688"
/codon_start=1
/transl_table=11
/fullproduct="qcoverage 100 , hcoverage 100 , similarity
100 , identity 100 , evaluate 2.05e-61 , alnlength 88 ,
Bacteria , Proteobacteria , WP_026097253.1 hypothetical
protein [Wolbachia endosymbiont of Ceratitis capitata]"
/translation="MYANNNSTGIEKPPNPLLYDWRNRVSLYFRLHGKQTARNADGSA
GKGEWRKRMPFCNEMDRICNINSRENEQTSIWVSLVTRNFVNHLR"
/product="hypothetical protein"
/besthit="qcoverage 100 , hcoverage 100 , similarity 100
, identity 100 , evaluate 2.05e-61 , alnlength 88 ,
Bacteria , Proteobacteria , WP_026097253.1 hypothetical
protein [Wolbachia endosymbiont of Ceratitis capitata]"
gene complement(2104..2304)
/locus_tag="wEsol_00689"
CDS complement(2104..2304)
/locus_tag="wEsol_00689"
/codon_start=1
/transl_table=11
/fullproduct="qcoverage 100 , hcoverage 100 , similarity
100 , identity 100 , evaluate 9.65e-39 , alnlength 66 ,
Bacteria , Proteobacteria , CAQ55081.1 hypothetical

```

protein WP0973 [Wolbachia endosymbiont of Culex quinquefasciatus Pel]"  
 /translation="MVRPESLRSYCLKGEEFIQKETERILKLIKPDVLPSESTHQCES  
 GNRLVPSDADNEPPLEKEDAQS"  
 /product="hypothetical protein"  
 /besthit="qcoverage 100 , hcoverage 100 , similarity 100  
 , identity 100 , evalue 9.65e-39 , alnlength 66 ,  
 Bacteria , Proteobacteria , CAQ55081.1 hypothetical  
 protein WP0973 [Wolbachia endosymbiont of Culex  
 quinquefasciatus Pel]"

gene 2461..2568  
 /locus\_tag="wEsol\_00690"

CDS 2461..2568  
 /locus\_tag="wEsol\_00690"  
 /codon\_start=1  
 /transl\_table=11  
 /product="hypothetical protein"  
 /translation="MRMPLFFSVPKIRLNDISFLGSRNLEKVIRNQPGE"

gene complement(2641..3888)  
 /locus\_tag="wEsol\_00691"

CDS complement(2641..3888)  
 /locus\_tag="wEsol\_00691"  
 /codon\_start=1  
 /transl\_table=11  
 /pfam="Pox\_D5 RVT\_1 GIIM"  
 /fullproduct="qcoverage 100 , hcoverage 100 , similarity  
 100 , identity 100 , evalue 7.62e-314 , alnlength 415 ,  
 Bacteria , Proteobacteria , WP\_155968744.1 group II  
 intron reverse transcriptase/maturase [Wolbachia  
 pipientis]"  
 /translation="MNKTKSFDIPKQLIWKAYKQVSKNRGAAGVDEVSITKFEENLKD  
 NLYKLWNRMSSGSYFPESVKAVAIPKDTGGQRTL CVPSVFDRIGQTAATMYLEPLVEP  
 EFHEDSYGYRPNKSALDAVSTACKRCWRSDWTIDLDISGFFDNL DHVLALQTIKKHTD  
 CKWVILYVERWMKAPIQLADGSKVVRNKGVPQGGSVSPIISNIFMHAFDMWMRQNY  
 TIPFERYVDDAMVHCKTQKQAKFIKDKIEERLAEFKLKLHPEKTQIVYCKDDNRRDEF  
 PIQSFDLGYTFRPRLAKNNKIGNYFVSFLPAISNKAKKKINQTI RSWKIRRQTYTTL  
 EKISKKINPIVRGWYQYYGRFYKSEMYP SLRNVEWHLVGWVRAKYKKLRNHRRLAKQF  
 LAKVRKRSPNIFYHWTGLGSGK"  
 /product="group II intron reverse  
 transcriptase/maturase"  
 /besthit="qcoverage 100 , hcoverage 100 , similarity 100  
 , identity 100 , evalue 7.62e-314 , alnlength 415 ,  
 Bacteria , Proteobacteria , WP\_155968744.1 group II  
 intron reverse transcriptase/maturase [Wolbachia  
 pipientis]"

gene 4553..6370  
 /locus\_tag="wEsol\_00692"

CDS 4553..6370  
 /locus\_tag="wEsol\_00692"  
 /codon\_start=1  
 /transl\_table=11  
 /fullproduct="qcoverage 100 , hcoverage 100 , similarity  
 100 , identity 100 , evalue 0.0 , alnlength 605 ,  
 Bacteria , Proteobacteria , WP\_213863493.1 DNA mismatch  
 repair endonuclease MutL [Wolbachia endosymbiont of  
 Ceratititis capitata]"  
 /cog="MutL COG0323 638 DNA mismatch repair enzyme  
 (predicted ATPase)"  
 /pfam="HATPase\_c HATPase\_c\_3 DNA\_mis\_repair MutL\_C"  
 /product="DNA mismatch repair endonuclease"

MutL  
 /translation="MAIILLDTKTINRIAAGEVIERPASVVKELVENAIDAGSSEIEI  
 KIESGGRNLITVTDDGNGIEKDDLELAFMRHATSKLSDSSELIEIKHLGFRGEALPSIA  
 AVSRMKLSSKASGAKESWSIRYEGGEKIREITPCSLQGTYYIEVRDLFFATPNRLKFL  
 KTERAETQSIVDIVNNLAMINYSIGFTLTSGNKKLLKYVKQTSFLNRLCEIEEEFQSN  
 SLEVKEEEEGIKLKGHICKPNVNRGNSTQIYTFVNGRPIKDNLLVGAIYAYHDFIPN  
 NRYPFVLHLLEVPYDQVDVNVHPNKSEVRFQNKRLIYEIVRRGIKTLSTRFAAGDQG  
 IEEELIFNDSKSQEQQVDSQEKKDQKEFYEKRPSLLENRLMKEFNAPDERRQSLPETFK  
 YGESPPQKGTMLERKQIDLIEDYPLGYSRCQVYNTYIIAEAKGKLIIVDQHAAHERL  
 IYECLKQKSSIKRQKLLLPEIVEIKNQAGMEMVEMYKDKLFEMGFGIEIESEDKVRVK  
 EIPAILGTINVKEMVMNIVDRLMEIGDTLPIEEKVNKILATIACHGSIRAGREMKLEE  
 MNELMRQMEETPYAGQC�NHRPTYIEMKLSDIEKLFERR"  
 /besthit="qcoverage 100 , hcoverage 100 , similarity 100  
 , identity 100 , evalue 0.0 , alnlength 605 , Bacteria ,  
 Proteobacteria , WP\_213863493.1 DNA mismatch repair  
 endonuclease MutL [Wolbachia endosymbiont of Ceratitidis  
 capitata]"  
 gene 6438..7376  
 /locus\_tag="wEsol\_00693"  
 CDS 6438..7376  
 /locus\_tag="wEsol\_00693"  
 /codon\_start=1  
 /transl\_table=11  
 /pfam="HTH\_31 HTH\_19 HTH\_3 HTH\_26 HTH\_31 HTH\_19 HTH\_3  
 HTH\_26"  
 /fullproduct="qcoverage 100 , hcoverage 100 , similarity  
 100 , identity 100 , evalue 3.30e-206 , alnlength 312 ,  
 Bacteria , Proteobacteria , WP\_213863494.1  
 helix-turn-helix domain-containing protein [Wolbachia  
 endosymbiont of Ceratitidis capitata]"  
 /translation="MKKENKCSNFLDYKVIGQEVNRRLAKGYTQKDLAKKIDTTYQV  
 ILQYKEGTRRISIKKLYELAEALSTTARDLACVQEVSNEGRYEGEEVLNLVRRHREIK  
 DQELRETFYLLTKFIRISEEESGKAVKIEVAKGLVKEGVS AHVISQTTSLSIDEYDND  
 EKKISIPYKVGQRIKEWRLRRGYTQEDLASKVGIINQRIYEYEQGRAGVSLEMLDEIA  
 KVLISITDLLPETTENENSEVELSRLIEEYKKIKSQELRNVLIKSLFESIQVCKEKV  
 KRVEKMKITKNLVKEGISINIILKTVDISLDEIQQI"  
 /product="helix-turn-helix  
 domain-containing protein"  
 /besthit="qcoverage 100 , hcoverage 100 , similarity 100  
 , identity 100 , evalue 3.30e-206 , alnlength 312 ,  
 Bacteria , Proteobacteria , WP\_213863494.1  
 helix-turn-helix domain-containing protein [Wolbachia  
 endosymbiont of Ceratitidis capitata]"  
 gene 7547..>7719  
 /locus\_tag="wEsol\_00694"  
 CDS 7547..>7719  
 /locus\_tag="wEsol\_00694"  
 /codon\_start=1  
 /transl\_table=11  
 /product="hypothetical protein"  
 /translation="MNNKENS KDRREEIEFRALESNGKALLDREVIETFLSAVHDREE  
 ARIIARKLIDRGC"  
 /besthit="qcoverage 94.7368421052632 , hcoverage  
 45.7627118644068 , similarity 100 , identity 100 , evalue  
 1.87e-25 , alnlength 54 , Bacteria , Proteobacteria ,  
 ERN55805.1 DNA repair protein RadC, partial [Wolbachia  
 pipientis wMelPop]"

|      |             |             |             |            |            |             |
|------|-------------|-------------|-------------|------------|------------|-------------|
| 121  | cataaatcct  | cagaatacat  | caacttttagt | ggtgacacta | atagtagaga | accttctctt  |
| 181  | gaaaaggagc  | ttgccaacat  | tcttgttcgt  | tttactctct | catcaaaata | ctttttccat  |
| 241  | tttaagtcaa  | ggggatttgc  | atccgctctg  | attttaacat | gtcgtctgat | aggtatatca  |
| 301  | atcagcttaa  | gcagtcctaa  | ataccgtatc  | tcttttggtt | tgttcttgca | tatgggtgca  |
| 361  | gcaaaaaccc  | attggcgttg  | acccattact  | ttgaagtaac | gattctttat | ccaacgtaat  |
| 421  | ccttttacgag | gatgtctttt  | ctttgcccac  | ttccataaac | tatgccaaat | ttcattgtcg  |
| 481  | atctttctaa  | acgctttttt  | agcacacaca  | tggtgatagt | aatttcccca | tcctctcagt  |
| 541  | agagaattga  | gtgacttaat  | tactatagcc  | tgagtgttcg | ctatatattg | ttttatcaat  |
| 601  | gtacgtgctt  | tattcagaag  | tcttttaata  | ctttctttcg | aagggttaat | aattaacttc  |
| 661  | ttattatata  | tacgtacatt  | acaaccaaga  | aagtcaaacc | ctggtgtgat | agatgtaatc  |
| 721  | tttgtcttct  | cttctgatag  | aattaaacct  | cgctcatgaa | gaaaagatga | tactaaaggc  |
| 781  | ttaaacttcat | tttccagtac  | ttcatgtgtg  | aaacctgaaa | taataaagtc | gtctgcgtac  |
| 841  | ctgattacat  | tcactccact  | tctgattttt  | cctcttcttt | tgctacctaa | tttaccaaag  |
| 901  | cgactttcta  | ataactgttc  | aagaccatct  | aaggtaaagt | tagctagtat | tggagaaatt  |
| 961  | atacttcctt  | gcggagtgcc  | agcagttgtg  | ggatacacag | ttttcgattc | taggaaacca  |
| 1021 | gcttttaacc  | atctatgaag  | aattttcttc  | tccataggaa | tatgcttcat | gagccattca  |
| 1081 | tggttaatgt  | tatcaaaaaca | acctttgata  | tcaccttcga | gtatccattg | tagttgatta  |
| 1141 | cgacttgcca  | gtaataagtg  | gcaagccaca  | gtagcgtctg | cgcaggatct | tttaggtcta  |
| 1201 | aagccgtaag  | agtgacgatc  | actgattgtt  | tcagctaccg | gttccaacgc | gagcagatac  |
| 1261 | aatgcttgca  | tcgctctatc  | ttttatcgtg  | ggtataccaa | gaggccttct | tttgccatta  |
| 1321 | gatttactga  | tataaattcg  | tttgagcgga  | gaaggtttat | atcctctttg | ttttagcagc  |
| 1381 | tttattcctt  | gaaatttagc  | attgcaagtt  | gaccatagtt | gacgatctac | acctgctgtg  |
| 1441 | gtttttcctt  | ggttttcagt  | tactctctta  | acagccaaag | cttttccgct | aaaagagcgt  |
| 1501 | gtgagaagat  | gttgtaaagc  | ttttacctta  | ccccatcttc | cttcttggac | agccttaaca  |
| 1561 | atacgtcttt  | gtagcctcac  | aataactttc  | tggcatttct | tccatggcaa | ttgcttccat  |
| 1621 | gcttcaaagc  | tttcggtaga  | tgcacttaca  | ggtttacttg | taatcatctg | ctttcctacc  |
| 1681 | ttaagtgggt  | aacaaagttt  | cttgtcacga  | gggaccaaat | ggaagtctgc | tcgttttcac  |
| 1741 | gagaattaat  | gttacaaatt  | ctatccattt  | cgttacaaaa | tggcattcgc | tttctccatt  |
| 1801 | ctcctttacc  | tgcacttcca  | tcagcattcc  | ttgcggtttg | cttgccatgt | aggcgaaaat  |
| 1861 | acaggcttac  | cctgtttctc  | cagtcataca  | acagtgggtt | aggtggcttc | tctataccgg  |
| 1921 | tggaattggt  | atttgcgtag  | atccagagat  | gaaaaatgta | tcttatccac | attacctttt  |
| 1981 | ggtcagagct  | tatcagcatc  | tttagctctt  | tcatcgtatc | ggtacttata | aagcttctact |
| 2041 | tacgttccac  | ataccactaa  | gcctagccct  | ccaaccacat | gatgcttgca | gtttatgcct  |
| 2101 | ctctcacgat  | tgagcatctt  | ctttttcaag  | aggaggttca | ttgtccgcat | cgcttggcac  |
| 2161 | caaccgggtt  | cccgattcgc  | actgatgcgt  | agactcagat | ggcaaaacat | ctgggttaat  |
| 2221 | aagtttttaga | atccttttcag | tttctttctg  | aatgaattcc | tctcctttta | aacaatatga  |
| 2281 | ccgaagactt  | tcaggtcgca  | ccatctcgca  | aatgtattga | gcacctgtag | aatctctaca  |
| 2341 | gagaacatca  | acaatgcttt  | gtttatcaga  | agcaatttca | gggtcttgaa | tagtacttaa  |
| 2401 | aaactctata  | tctttttattc | attttttacca | gtaaagccaa | gaatatcatt | gaggaagtga  |
| 2461 | atgaggatgc  | ctttatttttt | ttcagtagca  | aagatacgct | tgaacgatat | atcatttttg  |
| 2521 | ggatcaagaa  | acttagaaaa  | agtcataaga  | aatcaacctg | gagagtagac | cggcggagct  |
| 2581 | tccccaccag  | tctctcgcag  | aactgtacgt  | aaacctctca | atttatacac | ctcccgttat  |
| 2641 | tcagcctttt  | gatcccaatc  | ctagtgtcca  | gtgatagaaa | atatttggag | acctctttct  |
| 2701 | cactttttgct | agaaattgct  | ttgctagtct  | tctatgattt | cgaagtttct | tatatattggc |
| 2761 | tctgacctat  | cctactaggt  | gccactctac  | atttctgaga | gatggataca | tctctgattt  |
| 2821 | ataaaaacct  | ccatagtact  | gataccagcc  | tcggactata | ggattttatt | tctttgatat  |
| 2881 | tttctctagt  | gttgtatatg  | tttgccacg   | tattttccat | gaccttatgg | tttggttgat  |
| 2941 | cttcttcttg  | gctttgttgc  | taattgcagg  | tagaaatgag | acaaaatagt | ttcctatttt  |
| 3001 | attgttcttt  | gccagtctag  | gtctgaacgt  | gtaacccaga | aagtcaaagc | tctgtattgg  |
| 3061 | aaactcatct  | ctcctattgt  | cctccttaca  | gtacactatt | tgtgtctttt | caggatgtaa  |
| 3121 | ttttagctta  | aactcagcca  | atctttcttc  | gatcttgtct | tttatgaatt | ttgcctgttt  |
| 3181 | ctgggtttta  | cagtgcacca  | ttgcatcatc  | tacatatctc | tcaaacggta | ttgttgggta  |
| 3241 | gttttgccct  | atccacatat  | caaatgcagt  | atgcataaat | atgttagaaa | tgattgggct  |
| 3301 | tacagaacct  | ccttgtggaa  | ctccccttatt | cctaactacc | ttactgccat | ctgctagtgt  |
| 3361 | aatcggggct  | ttcatccacc  | tttccacgta  | cagtatgacc | cacttgcaat | ctgtatgctt  |
| 3421 | cttgatagtt  | tgcagtgtta  | acacatgatc  | cagattgtcg | aaaaatccag | aaatatcaag  |
| 3481 | atctatcgtc  | caatcacttc  | tccaacatct  | cttacacgct | gtacttaccg | catccagtgc  |
| 3541 | agacttgttt  | ggtctataac  | catatgaatc  | ttcgtgaaat | tccggctcta | ctaacggttc  |
| 3601 | gagatacata  | gtagctgctg  | tttgccctat  | cctgtcgaat | actgaaggaa | cacataaagt  |
| 3661 | tctttgtcct  | cctgtatctt  | ttggtatcgc  | aacagctttt | actgattctg | gaaaataact  |

|      |             |             |              |             |             |             |
|------|-------------|-------------|--------------|-------------|-------------|-------------|
| 3721 | tccggatgac  | atccgattcc  | acagtttgta   | tagattatct  | tttagatttt  | cttcaaactt  |
| 3781 | tgttatcgag  | acctcatcta  | cacctgccgc   | acctctgttt  | ttggataactt | gtttataagc  |
| 3841 | tttccaaatc  | agttgctttg  | gtatgtcaaa   | agattttgtt  | ttattcatta  | actcttcctt  |
| 3901 | ttcggttgat  | aaataattaa  | aactaaataa   | ctcagcccct  | tcgctccatt  | tccattacaa  |
| 3961 | aaacttcttc  | actactacaa  | gctaataccgc  | ccctgttttt  | cgcatacagta | ctctcttcct  |
| 4021 | tagagttcag  | ctccttggac  | ttctccctta   | tcatcgaaac  | gacaggttcc  | cgtagttcca  |
| 4081 | cacaatagcc  | tgaaataggt  | tcatgccacc   | tatatgccgg  | atgccaccta  | cccagtagac  |
| 4141 | aagttcccgga | taggcttatc  | ccaagttact   | ttttctcccc  | tggttttgac  | atcatcgcac  |
| 4201 | tacctttcga  | cgtgtaatac  | gtgggttcaact | tgcgttcatc  | tctctatttc  | acacatgacg  |
| 4261 | cataattacg  | ccttttccat  | aacgctcact   | accttggctc  | tttaccaaag  | cagcttatgg  |
| 4321 | ttgtttgaag  | cctgctcttg  | taaaccggct   | ccgaggggtc  | caccctcatc  | tattgtgcag  |
| 4381 | ctttcgcact  | tagtttgctc  | tttctgaac    | attccttgta  | tctctacggc  | acacaaaaag  |
| 4441 | cattaataat  | tatacataat  | tctaataatc   | ttcatgaaag  | ggcttagaat  | agaatttaata |
| 4501 | agacaatctg  | attttaattg  | atattaaact   | gatcagactg  | agagttgaaa  | atatggcaat  |
| 4561 | aattctttta  | gacacaaaaa  | ctataaatcg   | tatagcagcg  | ggagaggtaa  | tagaaaggcc  |
| 4621 | agcgagtgtg  | gtaaaggaat  | tagtagaaaa   | tgcaatagat  | gctggaagtt  | cagagataga  |
| 4681 | gatcaaaata  | gaaagtgggtg | gacgtaacct   | tataactgtg  | acagatgatg  | gaaatggaat  |
| 4741 | agaaaaggac  | gacttagaac  | tagcatttat   | gaggcatgcc  | acttcaaaat  | taagcgatag  |
| 4801 | tgagttaata  | gaaatcaagc  | accttggggt   | taggggagaa  | gctttacctt  | caattgcagc  |
| 4861 | agtaagcaga  | atgaaattat  | cgtctaaggc   | aagtggagca  | aaggaatcat  | ggtctataag  |
| 4921 | gtatgaggga  | ggagaaaaaa  | taagagagat   | tacccttgt   | tctttgttgc  | aaggtagata  |
| 4981 | tattgaagtt  | cgtgacttat  | tttttgctac   | accaaataga  | ctaaagtttc  | taaaaaccga  |
| 5041 | aagggcagaa  | acacaaagta  | ttgttgatat   | tgtgaataac  | ttagcgatga  | ttaattatag  |
| 5101 | tattgggttt  | actctcactt  | ctggtaataa   | aaagctctta  | aaatatgtta  | agcaaacttc  |
| 5161 | gctgttcaac  | agattatgtg  | aatagaaga    | agaatttcaa  | agcaattcac  | tgggaagtaa  |
| 5221 | agaggaagaa  | gaaggcatca  | aacttaaggg   | acacatctgt  | aaacctaata  | tcaatcgtgg  |
| 5281 | caactcaact  | cagatttata  | cgtttgttaa   | tgggaaggcca | ataaaagaca  | atctacttgt  |
| 5341 | tggtgcaatt  | agatatgcgt  | atcacgattt   | tattccaaac  | aataggtatc  | cttttgagc   |
| 5401 | gttgcattta  | gaagtaccat  | atgaccaagt   | agatgtaaat  | gtgcatccaa  | ataaatcgga  |
| 5461 | agtaagattt  | cagaataaaa  | ggctaataata  | tgaaatagt   | agaagaggga  | taataaaaaac |
| 5521 | actatcaacg  | agatttgacg  | cgggtgatca   | aggatttgaa  | gaggagctaa  | tttttaataga |
| 5581 | tagtaaaaagc | caagagcagg  | ttgatagtca   | agagaaaaaa  | gatcaaaaag  | agttttatga  |
| 5641 | aaagagacca  | agtcttttag  | aaaatcgtct   | aatgaaaagaa | ttcaatgcac  | cagatgaaag  |
| 5701 | aaggcaaagc  | ttaccagaaa  | cgttttaata   | tggagaatct  | ccaccccaaa  | agggaaacgat |
| 5761 | ggttttagaa  | aggaagcaaa  | ttgattttaat  | agaggattat  | cctctgggat  | attcacgctg  |
| 5821 | tcagggtctac | aatacttaca  | ttattgctga   | ggctaaaggc  | aaattaatta  | tagtagacca  |
| 5881 | gcacgcagct  | catgagaggt  | tgatctatga   | gtgcttaaaa  | caaaaatcaa  | gcataaaaaag |
| 5941 | gcaaaagctt  | cttcttcctg  | aaatagttga   | gattaaaaaac | caagcaggaa  | tggagatgggt |
| 6001 | tgaaatgtat  | aaagataagc  | ttttcgaaat   | gggttttggt  | attgaaatag  | aatcagaaga  |
| 6061 | taaagtaagg  | gtgaaagaaa  | tacctgcaat   | tttaggaaca  | ataaatgtga  | aagagatgggt |
| 6121 | gatgaatata  | gttgatagat  | taatggagat   | aggagatacg  | ctacctatag  | aagaaaaagt  |
| 6181 | gaacaagata  | ctagctacca  | ttgcgtgcca   | tgggtcaatt  | agagctggaa  | gggaaatgaa  |
| 6241 | gttgaggagg  | atgaatgagt  | tgatgagaca   | aatggaggaa  | acaccgtatg  | ctgggcaatg  |
| 6301 | caatcacgga  | agaccaacgt  | atatagaaat   | gaaactaagt  | gatatagaaa  | aattgtttga  |
| 6361 | aaggagatga  | gttcagtttg  | tcaaaaaggt   | tcccaattaa  | gtatacgtaa  | cggctcttct  |
| 6421 | gattatgagt  | ataaaatgtg  | aaaaaagaga   | ataaatgctc  | taatttttta  | gattacaaag  |
| 6481 | taataggaca  | ggaagtaaga  | aatcgtaggt   | tagcaaaggg  | atatactcaa  | aaagatttag  |
| 6541 | caaaaaaaat  | cgatacaaca  | tatcaggtaa   | tactgcaata  | tgaaaaagga  | acacgcagaa  |
| 6601 | tttcaattaa  | gaagttatat  | gaattagcag   | aagcattatc  | aacaactgct  | agagatctag  |
| 6661 | cttgcgtaca  | agaagtatca  | aatgagggaa   | ggtatgaggg  | agaagaggta  | ttaaatctag  |
| 6721 | taagaagaca  | tagagagatt  | aaggatcaag   | aattacgtga  | aacgttttat  | ttattaacta  |
| 6781 | aattcatccg  | tattagttag  | gaagaaagt    | gaaaggcggt  | aaaaatagaa  | gtagcaaagg  |
| 6841 | gtttggttaa  | ggaaggagtt  | tctgctcatg   | ttatctctca  | aacgaccagt  | ttatctattg  |
| 6901 | atgaatatga  | taatgatgag  | aaaaaaattt   | ccattccgta  | taaagtaggt  | caaagaataa  |
| 6961 | aagaatggag  | gttgagaaga  | ggatacactc   | aagaagattt  | agcaagtaaa  | gtgggtataa  |
| 7021 | taaatcaaag  | aatatatgaa  | tatgaacaag   | gacgagctgg  | tgtttcactt  | gaaatgttag  |
| 7081 | atgaaatagc  | aaaggtagta  | ttaatagtag   | ttacagacct  | acttccagaa  | acaacagaaa  |
| 7141 | atgagaatag  | tgaagtggaa  | ctatcaaggt   | taatagaaga  | atacaaaaag  | attaaaagcc  |
| 7201 | aagaactacg  | taatgtacta  | ataaaatctc   | tgtttgaaaag | catacaagtt  | tgcaaaagaga |
| 7261 | aagtgaagag  | agtagaaaag  | atgaaaatta   | caaagaattt  | agttaaggaa  | ggaatttcta  |

```

7321 tcaatattat tttaaaaaca gtagacatct ctttggacga aattcaacaa atttaaaata
7381 aaaaatcatt atctattaat atctttactt tttgatgaaa aaataagtaa aaaagattga
7441 aaaattgatt tgacttcact caaaagctat ggccttatgc caatgctgac aaaaaaacag
7501 cagtaaatat ataaaaacat tttgttatta gtgaagggtta atttttatga ataataagga
7561 aaacagtaaa gatcgtagag aagaaataga attcagagca ttagaaagca acggtaaagc
7621 actacttgat cgtgaagtaa tagaaacgtt tctaagtgc gtgcatgaca gggaagaagc
7681 tcgaattatt gctagaaagc taatagatag aggttgtcc

```

//

```

LOCUS      JAQZAU010000066      42782 bp      dna      linear      ENV 17-MAR-2023
DEFINITION MAG: Wolbachia pipientis isolate wEsol contig_38312, whole genome
            shotgun sequence.
ACCESSION  JAQZAU010000066  JAQZAU010000000
VERSION    JAQZAU010000066.1
DBLINK     BioProject: PRJNA929258
            BioSample: SAMN33142973
KEYWORDS   WGS; ENV; Metagenome Assembled Genome; MAG.
SOURCE     Wolbachia pipientis (insect metagenome)
ORGANISM   Wolbachia pipientis
            Bacteria; Pseudomonadota; Alphaproteobacteria; Rickettsiales;
            Anaplasmataceae; Wolbachieae; Wolbachia.
REFERENCE  1  (bases 1 to 42782)
AUTHORS    Fiutek,N., Couger,B.M., Roy,S., de la Torre,J.R. and Connor,E.F.
TITLE      Genomic assessment of the contribution of the Wolbachia
            endosymbiont of Eurosta solidaginis to gall-induction
JOURNAL    International Journal Molecular Sciences
REFERENCE  2  (bases 1 to 42782)
AUTHORS    Fiutek,N., Couger,B.M., Roy,S., de la Torre,J.R. and Connor,E.F.
TITLE      Direct Submission
JOURNAL    Submitted (10-FEB-2023) Biology, San Francisco State University,
            1600 Holloway Ave, San Francisco, CA 94132, USA
COMMENT    ##Genome-Assembly-Data-START##
            Assembly Date      :: JUN-2019
            Assembly Method    :: FLYE v. 06-2019
            Genome Representation :: Full
            Expected Final Version :: Yes
            Genome Coverage    :: 100.0x
            Sequencing Technology :: Illumina HiSeq; PacBio Sequel
            ##Genome-Assembly-Data-END##
FEATURES   Location/Qualifiers
            source              1..42782
                                /organism="Wolbachia pipientis"
                                /mol_type="genomic DNA"
                                /submitter_seqid="contig_38312"
                                /isolate="wEsol"
                                /isolation_source="galls on Solidago altissima"
                                /host="Eurosta solidaginis MN-2018-EFC"
                                /db_xref="taxon:955"
                                /environmental_sample
                                /country="USA: Cowling Arboretum, Carleton College,
                                Northfield, MN"
                                /lat_lon="44.48 N 93.13 W"
                                /altitude="280 m"
                                /collection_date="2018-11"
                                /metagenome_source="insect metagenome"
                                /note="metagenomic"
            gene                complement(<1..143)
                                /locus_tag="wEsol_00695"
            CDS                 complement(<1..143)
                                /locus_tag="wEsol_00695"
                                /codon_start=1

```

```

/translation="MRKVIKYISIIIGIACLVLLFFISNVETRVKTQEEQFLAVEDGN
AQE"
/besthit="qcoverage 100 , hcoverage 79.6610169491525 ,
similarity 100 , identity 100 , evalue 1.28e-21 ,
alnlength 47 , Bacteria , Proteobacteria , WP_223823054.1
ankyrin repeat domain-containing protein [Wolbachia
pipientis]"
gene complement(570..914)
/locus_tag="wEsol_00696"
CDS complement(570..914)
/locus_tag="wEsol_00696"
/codon_start=1
/translation="MNTFKVQFFSPDDQISFSGVVSLSVTGLEGELMILAHHPYLIY
LLPGMITVKMSNQIEKKVVIDSGVLEVANNNCISIITSQIQVFDRAIHDEKSFKNKRIS
IYLSYLDEKFLS"
/besthit="qcoverage 100 , hcoverage 100 , similarity 100
, identity 100 , evalue 3.48e-72 , alnlength 114 ,
Bacteria , Proteobacteria , WP_015588865.1 MULTISPECIES:
F0F1 ATP synthase subunit epsilon [unclassified
Wolbachia]"
/cog="AtpC COG0355 135 F0F1-type ATP synthase, epsilon
subunit (mitochondrial delta subunit)"
/pfam="ATP-synt_DE_N Ub-RnfH"
/tigr="TIGR01216 ATP_synt_epsilon 130 ATP synthase F1,
epsilon subunit"
/product="F0F1 ATP synthase
subunit epsilon"
/translation="MNTFKVQFFSPDDQISFSGVVSLSVTGLEGELMILAHHPYLIY
LLPGMITVKMSNQIEKKVVIDSGVLEVANNNCISIITSQIQVFDRAIHDEKSFKNKRIS
IYLSYLDEKFLS"
/besthit="qcoverage 100 , hcoverage 100 , similarity 100
, identity 100 , evalue 3.48e-72 , alnlength 114 ,
Bacteria , Proteobacteria , WP_015588865.1 MULTISPECIES:
F0F1 ATP synthase subunit epsilon [unclassified
Wolbachia]"
gene complement(927..2378)
/locus_tag="wEsol_00697"
CDS complement(927..2378)
/locus_tag="wEsol_00697"
/codon_start=1
/translation="MLGDKNKEMNIGRAIKVTQAVVDIKFEGELPKIFNALKSKLKYK
DKELVLEVSQHIGDNIVRCIAMDSTDGMSRGDEFVDTGAPISVPIGRSTLGRIFNVVG

```

```

ELIDECGPLKGKYNLEPIHRAPPSFTEQRIQEEVLVTGIKVIDLLAPYLKGGKIGLFG
GAGVGKTVLIMELINNIKAHKGFSVFAGVGERTREGNDLYHEMITSNVININEHEKS
QAVLVYQGMNEPPGARARIALTALTMAEYFRDRENQDVLFFVDNIFRFTQAGSEISAL
LGRIPSAVGYQPTLATDMGAMQERIASTTSGSITSVQAIYVPADDLTD PAPATTFSHL
DATTVLSRQIAEMGIYPAVDPLDSTSQSLSAEIIGEEHYNVASEVKRILQTYKSLQDI
IAILGMDELSDEDKIIIVDRARKIQKFLSQPFHVAEIFTGMPGKFVSLSDTVSSFKGIV
EGKYDHLPEAAFYVMGNIDEAIIKKAELIQAEAK"
/besthit="qcoverage 100 , hcoverage 100 , similarity 100
, identity 99.8 , evalue 0.0 , alnlength 483 , Bacteria ,
Proteobacteria , CDR78583.1 ATP synthase F0F1 subunit
beta,ATP synthase subunit beta,F0F1 ATP synthase subunit
beta,F0F1-type ATP synthase, beta subunit,ATP synthase
F1, beta subunit,ATP synthase alpha/beta family,
nucleotide-binding domain [Wolbachia endosymbiont of
Drosophila simulans wAu]"
gene complement(2456..3556)
/locus_tag="wEsol_00698"
CDS complement(2456..3556)
/locus_tag="wEsol_00698"
/codon_start=1
/transl_table=11
/fullproduct="qcoverage 100 , hcoverage 100 , similarity
99.7 , identity 99.7 , evalue 5.49e-239 , alnlength 366 ,
Bacteria , Proteobacteria , AGJ99643.1 Phosphate ABC
transporter, permease protein, putative [Wolbachia
endosymbiont of Drosophila simulans wHa]"
/cog="PstC COG0573 310 ABC-type phosphate transport
system, permease component"
/pfam="BPD_transp_1"
/tigr="TIGR02138 phosphate_pstC 296 phosphate ABC
transporter, permease protein PstC"
/product="Phosphate ABC transporter, permease
protein, putative"
/translation="MHGRMNSVIVIPVLLILLFCFSRFQEVNKVKSYLYLSCVWMLTW
LLVFYNNCFVTFISIALFFMLAFIFKNKRNKIIKLSLFVALAISFFITLFIMLSIFI
QSISFFNKVAISEFLFCLKWGHNVVTINEEKIGCFGIAPLLVGTLLITIIAMLVVVP
GLFSAIYISEYASEKVRYIVNTTLQVLSAIP TVVYGYFAVVFLSFFIKQVANFFGLSI
HSESALVAGLSIGIMILPFIISLLEDAIRSVPKSLRYGFMALGATPAETIWHITIPYA
MPTILSAILLSISRVIGETMIVLMAVGINANLTFNPLNSVTTITVQIATLLTGDQDFN
SVQTLAAYALS LVLFIITWLLNAFALFVMKRN"
/besthit="qcoverage 100 , hcoverage 100 , similarity 99.7
, identity 99.7 , evalue 5.49e-239 , alnlength 366 ,
Bacteria , Proteobacteria , AGJ99643.1 Phosphate ABC
transporter, permease protein, putative [Wolbachia
endosymbiont of Drosophila simulans wHa]"
gene 3992..4129
/locus_tag="wEsol_00699"
CDS 3992..4129
/locus_tag="wEsol_00699"
/codon_start=1
/transl_table=11
/pfam="Ribonuclease_P"
/fullproduct="qcoverage 100 , hcoverage 100 , similarity
100 , identity 100 , evalue 4.19e-22 , alnlength 45 ,
Bacteria , Proteobacteria , WP_006279896.1 MULTISPECIES:
hypothetical protein [Wolbachia]"
/translation="MLAKISILNISNIGHYYIILTHRNIMQASYKNLQKDLTICLKKI
K"
/product="hypothetical protein"
/besthit="qcoverage 100 , hcoverage 100 , similarity 100

```

```

, identity 100 , evalue 4.19e-22 , alnlength 45 ,
Bacteria , Proteobacteria , WP_006279896.1 MULTISPECIES:
hypothetical protein [Wolbachia]"
gene 4216..4479
/locus_tag="wEsol_00700"
CDS 4216..4479
/locus_tag="wEsol_00700"
/codon_start=1
/transl_table=11
/fullproduct="qcoverage 100 , hcoverage 100 , similarity
100 , identity 100 , evalue 2.51e-57 , alnlength 87 ,
Bacteria , Proteobacteria , WP_141456820.1 MULTISPECIES:
hypothetical protein [unclassified Wolbachia]"
/translation="MVEHIKEVNNTGFGQMYQFLFLPKGTGTDWRSQFRQQEELFKKV
GGNVILPEISNSPSKGNQLGEVGTMLNNVENDQEHIRKKRYHS"
/product="hypothetical protein"
/besthit="qcoverage 100 , hcoverage 100 , similarity 100
, identity 100 , evalue 2.51e-57 , alnlength 87 ,
Bacteria , Proteobacteria , WP_141456820.1 MULTISPECIES:
hypothetical protein [unclassified Wolbachia]"
gene 7839..8915
/locus_tag="wEsol_00701"
CDS 7839..8915
/locus_tag="wEsol_00701"
/codon_start=1
/transl_table=11
/pfam="TPR_11 TPR_12 TPR_2 TPR_1 TPR_8 Apc3 TPR_7
Ubie_methyltran Methyltransf_32 CheR Methyltransf_23
Methyltransf_16 MTS NodS Methyltransf_31 MetW
Methyltransf_18 Methyltransf_26 Methyltransf_25
Methyltransf_12 Methyltransf_11"
/fullproduct="qcoverage 100 , hcoverage 100 , similarity
100 , identity 100 , evalue 3.61e-265 , alnlength 358 ,
Bacteria , Proteobacteria , WP_015588862.1 MULTISPECIES:
methyltransferase domain-containing protein [unclassified
Wolbachia]"
/translation="MKSNLFSFIKNVALNCMSKLGVLNIIKKVKHFIVNKYNTLHKEMT
VLLKKSKNLLNTNIEIGLYHFYKGSISDAKLRFWLISIFYPHLPIVWYNIGRCHFAVG
NTNKAYNYLTRALKLDNDHEEASYYIKMTNSAPITELPKNLIRQYFDYTGEYFVEHW
LIAKQYRGHELVMIIITKIFNNSTSELNILDLCGTGICGHFLKINSIGNHIIIGIDIS
SRMLNIARGCFIKGKPVYNELIHHMEMKEFLKQEKNNQYDVIIFAEVLHYLHDFQEELE
LAKRSTSKKGVIVCLIRKEGEGIDFVNKG DYFRHSESYVQHVAKEINMQISYMSYCK
IYGSQVDGILFALQHQQENPKNLT"
/product="methyltransferase
domain-containing protein"
/besthit="qcoverage 100 , hcoverage 100 , similarity 100
, identity 100 , evalue 3.61e-265 , alnlength 358 ,
Bacteria , Proteobacteria , WP_015588862.1 MULTISPECIES:
methyltransferase domain-containing protein [unclassified
Wolbachia]"
gene 8974..10758
/locus_tag="wEsol_00702"
CDS 8974..10758
/locus_tag="wEsol_00702"
/codon_start=1
/transl_table=11
/pfam="Ribonuc_red_lgN Ribonuc_red_lgC Ribonuc_red_lgC"
/fullproduct="qcoverage 100 , hcoverage 100 , similarity
100 , identity 100 , evalue 0.0 , alnlength 594 ,
Bacteria , Proteobacteria , WP_006280151.1 MULTISPECIES:

```

```

ribonucleoside-diphosphate reductase subunit alpha
[Wolbachia]"
/translation="MNNITINYAKDSKLTDFGKAVLSDRYLIENESYQDLFARIANY
SDNKEHAQRLYDYSNLWFMPSTPILSNGGTRGLPISCFLNETEDSLQGIVDLWNE
VWLAARGGGIGSYWGNLRSIGESVKGSGKTS GIVPFIVVQNALTLAISQGS LRRGSSA
VYLPVSHPEIEEFDLRKPTGGDPNRKALNIHHAVIVTDKFMQAVENDQEWNLISPHN
NKVISTVKARDIWIKILTARVETGEPYIIFLDATNNNKPE SYKKLNLDIKMSNLCSEI
TLTTGYDHLNKSRTAVCC LSSVNLEYEEWKDNKLFIEDIMRFLDNVLEDFINKAPNE
MQRAKYSAARERSIGLGVMGFHSFLQSKMVPFESVTAQQWNKKIFKYLREQADIVSKK
LAEKKGACSDAKEVDLMERFTHKLAIAPTASISIIAGNTSPGIEPYAANVFIQKTLTG
SFVVRNKFLQKLLAEKNQDNDKIWSSISTNEG SVQHLDLSEHEKLTFTAYELDQRW
IIEHASDRTSYICQSQSVNLFLPANVHKRYLHKIHLAWKKGLKSLYYCRSQSMQRAD
KVSHDIFKKSEILQQKTDIDYDECLSCQ"
/product="
ribonucleoside-diphosphate reductase subunit alpha"
/besthit="qcoverage 100 , hcoverage 100 , similarity 100
, identity 100 , evaluate 0.0 , alnlength 594 , Bacteria ,
Proteobacteria , WP_006280151.1 MULTISPECIES:
ribonucleoside-diphosphate reductase subunit alpha
[Wolbachia]"
gene 11726..13288
/locus_tag="wEsol_00703"
CDS 11726..13288
/locus_tag="wEsol_00703"
/codon_start=1
/transl_table=11
/pfam="GATase Peptidase_C26 GATase_3 NAD_synthase
Pfam-B_78 Asn_synthase tRNA_Me_trans PAPS_reduct
GMP_synt_C"
/fullproduct="qcoverage 100 , hcoverage 100 , similarity
100 , identity 100 , evaluate 0.0 , alnlength 520 ,
Bacteria , Proteobacteria , WP_141456818.1 MULTISPECIES:
glutamine-hydrolyzing GMP synthase [unclassified
Wolbachia]"
/translation="MSAIAIIDFGSQFTQLIARQVRGMGVYCEIFPSNISFETISKFN
GFILSGGPQSVNDDCSETSRVVHEIIKLNEATSVPILGICYGQQLICHYFGAKVKESF
KQEFGRTKIKILKESPIVKDTWDVNSEVDVLMNHADSVDTIPQGFTVIASGVINQ TIA
MIVNEQRKIYCTQFHPEVRPTTNGSKLLSNFLDIANCERDWTMKS FIEEQKEKIKNVV
GEKKVIAAVSGGVDSSVAAALTYKAIGKQLNCIFIDTGLLRKNQTIAMLKEIPINYVD
KSNLFLSRLKGITDPEEKRKIIIGNTFIEVFEEEA KKIGDVDFLMQGTIYSDVVESGHA
SDNTSTIKSHHNVGGLPEKMNLKLVEPLRYLFKDEVRLLGKEIGLSDEIIFQHFPFGP
GLAVRIISEVDKEKVQILQEVD EIIYINTMKNYDLYDKIWQAFVLLPIKTVGVMGDGR
TYGYVCALRAVTSSDGMTADAFPFENKDQHLLVFWDFLQNVGSIIVNNVPGVNRVVD
ITSKPPATIEWE"
/product="
glutamine-hydrolyzing GMP synthase"
/besthit="qcoverage 100 , hcoverage 100 , similarity 100
, identity 100 , evaluate 0.0 , alnlength 520 , Bacteria ,
Proteobacteria , WP_141456818.1 MULTISPECIES:
glutamine-hydrolyzing GMP synthase [unclassified
Wolbachia]"
gene complement(13321..14028)
/locus_tag="wEsol_00704"
CDS complement(13321..14028)
/locus_tag="wEsol_00704"
/codon_start=1
/transl_table=11
/fullproduct="qcoverage 100 , hcoverage 100 , similarity
100 , identity 100 , evaluate 2.73e-146 , alnlength 235 ,
Bacteria , Proteobacteria , WP_038199715.1 MULTISPECIES:

```

```

membrane protein [Wolbachia]"
/cog="TerC COG0861 254 Membrane protein TerC, possibly
involved in tellurium resistance"
/pfam="TerC"
/tigr="TIGR03716 R_switched_YkoY 220 integral membrane
protein, YkoY family"
/product="membrane protein"
/translation="MLTDAWTLTLTLLETILSVNLI F ISLAIDKVPNALRERVRLM
GLGLALLMR FVILFFTSSILSMQKPIFHTASARDLLMIAGGLFLIVKSSMELRDDIFV
CKKNKKKANVKS KFFLVVLQIILIDLVSVD S ILTAIALTYNMVIIATAFTFSMLAML
FLSSYTAQLIKSNPGLKIIAILFILLVGVYLILHGFHIELPKGYLYSSFMFALLVEII
SKIKKINRHTAIHSRYL"
/besthit="qcoverage 100 , hcoverage 100 , similarity 100
, identity 100 , evalue 2.73e-146 , alnlength 235 ,
Bacteria , Proteobacteria , WP_038199715.1 MULTISPECIES:
membrane protein [Wolbachia]"
gene 14289..14402
/locus_tag="wEsol_00705"
CDS 14289..14402
/locus_tag="wEsol_00705"
/codon_start=1
/transl_table=11
/fullproduct="qcoverage 100 , hcoverage 100 , similarity
100 , identity 100 , evalue 7.01e-20 , alnlength 37 ,
Bacteria , Proteobacteria , AAS13939.1 hypothetical
protein WD_0193 [Wolbachia endosymbiont of Drosophila
melanogaster]"
/translation="MYIKGSPSGKVFAGYQAFIPSP LPPKFEWDNDLVNSL"
/product="hypothetical protein"
/besthit="qcoverage 100 , hcoverage 100 , similarity 100
, identity 100 , evalue 7.01e-20 , alnlength 37 ,
Bacteria , Proteobacteria , AAS13939.1 hypothetical
protein WD_0193 [Wolbachia endosymbiont of Drosophila
melanogaster]"
gene 14426..14608
/locus_tag="wEsol_00706"
CDS 14426..14608
/locus_tag="wEsol_00706"
/codon_start=1
/transl_table=11
/fullproduct="qcoverage 100 , hcoverage 100 , similarity
100 , identity 100 , evalue 2.84e-33 , alnlength 60 ,
Bacteria , Proteobacteria , WP_006279522.1 MULTISPECIES:
hypothetical protein [Wolbachia]"
/translation="MVENLGVVFTTAQRAIVKLEDLGIVSQTSQGRDRVYCATDILN
ILEEPTKITENFDSTL"
/product="hypothetical protein"
/besthit="qcoverage 100 , hcoverage 100 , similarity 100
, identity 100 , evalue 2.84e-33 , alnlength 60 ,
Bacteria , Proteobacteria , WP_006279522.1 MULTISPECIES:
hypothetical protein [Wolbachia]"
gene 14794..15612
/locus_tag="wEsol_00707"
CDS 14794..15612
/locus_tag="wEsol_00707"
/codon_start=1
/transl_table=11
/pfam="Ank_2 Ank_5 Ank Pfam-B_3279"
/fullproduct="qcoverage 100 , hcoverage 100 , similarity
100 , identity 100 , evalue 1.47e-173 , alnlength 272 ,

```

Bacteria , Proteobacteria , WP\_141456816.1 MULTISPECIES:  
 ankyrin repeat domain-containing protein [unclassified  
 Wolbachia]"

/translation="MINNLDSIILGIKDGEKAIEDLRVVLKKRKEEVITTQTFNYALR  
 CPKTTKEAIVHEILLHFQNPGEQSLEQVIQCLDRAIQSGIYAKNNPIRNLDEEFRTH  
 INFKDEEGNTLLHHAVIGNKTEEIITLLVTYSANPLIQNADNKIPLDLAQGETKEVLI  
 KSMKKQANTKKESAMVGS LVPGVIIIGGFLGVVLGAGVCVAVSLSGGMILGVMIASSLV  
 ASIAIGLAM YFLSQDYEQA KAEKTISTVSSEISVDDTTAANKNNKEGPQLTYS"

/product="ankyrin repeat  
 domain-containing protein"

/besthit="qcoverage 100 , hcoverage 100 , similarity 100  
 , identity 100 , evalue 1.47e-173 , alnlength 272 ,  
 Bacteria , Proteobacteria , WP\_141456816.1 MULTISPECIES:  
 ankyrin repeat domain-containing protein [unclassified  
 Wolbachia]"

gene 16037..18601

/locus\_tag="wEsol\_00708"

CDS 16037..18601

/locus\_tag="wEsol\_00708"

/codon\_start=1

/transl\_table=11

/fullproduct="qcoverage 100 , hcoverage 100 , similarity  
 100 , identity 99.9 , evalue 0.0 , alnlength 854 ,  
 Bacteria , Proteobacteria , AGJ99635.1 DNA mismatch  
 repair protein MutS [Wolbachia endosymbiont of Drosophila  
 simulans wHa]"

/cog="MutS COG0249 843 Mismatch repair ATPase (MutS  
 family)"

/pfam="MutS\_I MutS\_II MutS\_III MutS\_IV MutS\_V"

/product="DNA mismatch repair protein MutS"

/translation="MCNIIYNNVYQYNILKNIMSFVKEKNTPVMEQYLN LKAQYKDHL  
 LFYRLGDFYELFFDDAIKAAKLLNIVLTKRGN SCGQEIPMCGVPAHSSES YLHKLIDL  
 GFKVAICDQLETADEAKKRGYKSIVKRDVVRVTPGTI IEDSLLEDKSNNYLASIVEQ  
 NDEYAI SWLELSTGKFFHTLTSLKALDSDLLRISP REL LISEKFTED EKIRSILKNYK  
 ISITQHAQSFFEYSKSHRTLCEFYKIRELG SIGNFSKVEIMACGALLEYVRVTQRGSI  
 PRLEFPKTYKQQNFMLIDASARRNLELFSTQFGEKKGSLISVIDHTVTASGGRLLKQM  
 LASPLACSKAINLRLSTAQFFVN NHEPRRKIREILSNIPDIERSLSRLILGRGSPKDM  
 NLLKIGL GKTLELSEFLSTLHNYCLSEKSEINSQMSFQCLTGEKEPVSTTQVISSDES  
 ELSTIHKSLGNHKDLFELLNSAILDNNLSSVKEGGFIYPKYNSELSYILNNSNKL  
 VTKLRESYRDLTGIAALKILHNNILGY YVEVSANHKITS DIFIHRQSLANS MRYTTNE  
 LKELENKILTARDA AIGLEMKIFSEL CSEVAKES EKIALAANALAKLDIRTAFAELAV  
 QNNYVKPIIDDSKEFNICSGRHPVVEVNDKF IANSINLAGIHLITGPNMAGKSTFLRQ  
 NALIAILAHMG SFVPAESVHIGVIDKIFSRVGATDNITAGYSTFMVEMIETATIVNQ A  
 TDRSLVILDEIGRGTGVYDGLSIAQAVIEHIHNVNKCRAIFATHYHELT KVS KYLKNV  
 KCFCVKIREWNGEVIFLHEVIEGIADESYGIHVAKLAGFPDSVLNRASEVFEE LKA"

/besthit="qcoverage 100 , hcoverage 100 , similarity 100  
 , identity 99.9 , evalue 0.0 , alnlength 854 , Bacteria ,  
 Proteobacteria , AGJ99635.1 DNA mismatch repair protein  
 MutS [Wolbachia endosymbiont of Drosophila simulans wHa]"

gene complement(18923..19099)

/locus\_tag="wEsol\_00709"

CDS complement(18923..19099)

/locus\_tag="wEsol\_00709"

/codon\_start=1

/transl\_table=11

/fullproduct="qcoverage 100 , hcoverage 100 , similarity  
 100 , identity 100 , evalue 1.44e-32 , alnlength 58 ,  
 Bacteria , Proteobacteria , RLT60659.1 hypothetical  
 protein WANA31\_0944 [Wolbachia endosymbiont of Drosophila  
 ananassae]"

```

/translation="MKKKAKEALGLLSALKYWRFCLCFKRLTSEIQPLLIATNLRCKCL
RNLPSRKKDKESPS"
/product="hypothetical protein"
/besthit="qcoverage 100 , hcoverage 100 , similarity 100
, identity 100 , evalue 1.44e-32 , alnlength 58 ,
Bacteria , Proteobacteria , RLT60659.1 hypothetical
protein WANA31_0944 [Wolbachia endosymbiont of Drosophila
ananassae]"
gene complement(19591..19989)
/locus_tag="wEsol_00710"
CDS complement(19591..19989)
/locus_tag="wEsol_00710"
/codon_start=1
/transl_table=11
/fullproduct="qcoverage 100 , hcoverage 100 , similarity
100 , identity 100 , evalue 6.82e-92 , alnlength 132 ,
Bacteria , Proteobacteria , WP_007548550.1 MULTISPECIES:
hypothetical protein [Wolbachia]"
/translation="MVDFIDLFQGSKDFTMCMHNGSGDAIYNRCISAVRMDPPCMHGE
SIQGLFESSFEQGVVTVRVNLDLETlnVVVYKSPPTSDKLDAFSLAYQIDRYHIDENT
IVFDEKVNTIKFDISNPLKHKHFIITFEIFKR"
/product="hypothetical protein"
/besthit="qcoverage 100 , hcoverage 100 , similarity 100
, identity 100 , evalue 6.82e-92 , alnlength 132 ,
Bacteria , Proteobacteria , WP_007548550.1 MULTISPECIES:
hypothetical protein [Wolbachia]"
gene 20063..21301
/locus_tag="wEsol_00711"
CDS 20063..21301
/locus_tag="wEsol_00711"
/codon_start=1
/transl_table=11
/fullproduct="qcoverage 98.7864077669903 , hcoverage
99.5110024449878 , similarity 98.8 , identity 97.5 ,
evalue 1.49e-286 , alnlength 407 , Bacteria ,
Proteobacteria , ERN55977.1 ribonuclease D [Wolbachia
pipientis wMelPop]"
/cog="Rnd COG0349 361 Ribonuclease D"
/pfam="DNA_pol_A_exo1"
/tigr="TIGR01388 rnd 363 ribonuclease D"
/product="ribonuclease D"
/translation="MTLIAKFNISSKVEPLNKKHMLINTTSELEDICEGLIAKKPKFI
AVDTEFIRNNLIYYPKLSLIQISYGEKSFIVDALVPEIDLSFIKKIMLNQGITKVFHS
CRQDIESLLTVFKCIPTPIFDTQVAAMFCHYYHDFIGYSKVVEQYQGIALDKIKAKNS
DWLRRPLSEDQLDYAVNDVVHLYDLYQILCNKLENNRMGWFQEEMESIVDINKYLHS
PKDAWKRIKFNYEVNPRILITVKAVSEWQETLAQRYNMNRNKIINNAVIADFIEKNVE
HVDEILDDLKRNTKNIKDADLLEFVNIFNENERNWMQQNNTLSSNYDKSVLDILSIIL
DSKCKESNISRKLVSSKDELTSISRQTDKLFKGWRYDFFGRSVESFLNTSSKFEISA
VKSANNITKIQSNLVENNCC"
/besthit="qcoverage 98.7864077669903 , hcoverage
99.5110024449878 , similarity 98.8 , identity 97.5 ,
evalue 1.49e-286 , alnlength 407 , Bacteria ,
Proteobacteria , ERN55977.1 ribonuclease D [Wolbachia
pipientis wMelPop]"
gene 21613..22200
/locus_tag="wEsol_00712"
CDS 21613..22200
/locus_tag="wEsol_00712"
/codon_start=1
/transl_table=11

```

```

/fullproduct="qcoverage 100 , hcoverage 100 , similarity
100 , identity 100 , evalule 3.09e-130 , alnlength 195 ,
Bacteria;Eukaryota , Proteobacteria;Arthropoda ,
WP_006280338.1 MULTISPECIES: dephospho-CoA kinase
[Wolbachia]"
/cog="CoaE COG0237 201 Dephospho-CoA kinase"
/pfam="CoaE AAA_17 AAA_18"
/tigr="TIGR00152 TIGR00152 188 dephospho-CoA kinase"
/product="dephospho-CoA
kinase"
/translation="MIISLTGGIGVGKSFVANCQEFQAVVFDADSVVHQLYKVDKSI
ISYAEKNFPGVVVNGEIDRTVLSKYFLAYDENWKQFQSLVHSAVLRELEFFIAKEKKI
DRKLLVLDVPLLLETKFYLYCDLIVFVHADSVVQAQRLNERNIDKEKLNLSIDVQLSI
EEKRKMSDFIIDTSVSKEYVFSQVKDIVDSLNLNT"
/besthit="qcoverage 100 , hcoverage 100 , similarity 100
, identity 100 , evalule 3.09e-130 , alnlength 195 ,
Bacteria;Eukaryota , Proteobacteria;Arthropoda ,
WP_006280338.1 MULTISPECIES: dephospho-CoA kinase
[Wolbachia]"
gene 22864..24288
/locus_tag="wEsol_00713"
CDS 22864..24288
/locus_tag="wEsol_00713"
/codon_start=1
/transl_table=11
/pfam="NMO"
/fullproduct="qcoverage 100 , hcoverage 100 , similarity
99.2 , identity 98.1 , evalule 0.0 , alnlength 474 ,
Bacteria , Proteobacteria , RLT60449.1 nitronate
monooxygenase family protein [Wolbachia endosymbiont of
Drosophila ananassae]"
/translation="MKDC EEVLKNKIKKIVISGKEVWPIIEGGKGIAVSDGRSSGAFA
AADAVGTFSGANAKLIDDNGKLVPLIYKGKTRNEKHSELIEYSIEAGISQARIANEIS
KGHGRIHMNVLWEMGAAERVLHGILEGAKGLIHGITCGAGMPYRLGEIAAKYQVYYYP
IISSVRAFKALWKRAYQRISSYLLGGVVYEDPWLAGGHNGLSNSEDPELPQAPFERVA
ELRSFMNEIGLSETPIVMAGGVWHLKDWEHWFNNLQIGPIAFQFGTRPLLTKESPISA
EWKKKLLTLEEGDVFLNKFSPTGFYSSAVKNNFIRELQERNRQIKFSENASEEFNNE
FAMGSRGRKIYLTAKDKELANTWTKAGYTEAMKTPDSTVIFVTPDKFKQIREDQINCM
GCLSHCLFSNWKDHGDHSTGRKPDPRSFCIQKTLQNVIHGDGIENELMFSGHNVYKFK
QDPFYENGYVPAVKELVERILTGY"
/product="nitronate monooxygenase family
protein"
/besthit="qcoverage 100 , hcoverage 100 , similarity 99.2
, identity 98.1 , evalule 0.0 , alnlength 474 , Bacteria ,
Proteobacteria , RLT60449.1 nitronate monooxygenase
family protein [Wolbachia endosymbiont of Drosophila
ananassae]"
gene complement(24380..24544)
/locus_tag="wEsol_00714"
CDS complement(24380..24544)
/locus_tag="wEsol_00714"
/codon_start=1
/transl_table=11
/fullproduct="qcoverage 100 , hcoverage 100 , similarity
100 , identity 100 , evalule 5.23e-31 , alnlength 54 ,
Bacteria , Proteobacteria , WP_080717614.1 MULTISPECIES:
IS3 family transposase [Wolbachia]"
/cog="Tra5 COG2801 232 Transposase and inactivated
derivatives"
/pfam="rve_3 rve rve_2"

```

```

        /product="IS3 family
        transposase"
        /translation="MSHKGCCYDNSVVESFFSSLKREILIDTSQHSAQQTRTAIFEYI
        EIFYNKQRHY"
        /besthit="qcoverage 100 , hcoverage 100 , similarity 100
        , identity 100 , evalue 5.23e-31 , alnlength 54 ,
        Bacteria , Proteobacteria , WP_080717614.1 MULTISPECIES:
        IS3 family transposase [Wolbachia]"
gene      complement(24534..24698)
        /locus_tag="wEsol_00715"
CDS       complement(24534..24698)
        /locus_tag="wEsol_00715"
        /codon_start=1
        /transl_table=11
        /fullproduct="qcoverage 100 , hcoverage 100 , similarity
        100 , identity 98.1 , evalue 4.17e-28 , alnlength 54 ,
        Bacteria , Proteobacteria , WP_167482801.1 hypothetical
        protein [Wolbachia endosymbiont of Carposina sasakii]"
        /cog="Tra5 COG2801 232 Transposase and inactivated
        derivatives"
        /pfam="rve"
        /product="hypothetical protein"
        /translation="MSSAINKQLVMDSSLMDVNRKPKAKNLLHSDQGSQYTLQGYQY
        LLSIKNIDES"
        /besthit="qcoverage 100 , hcoverage 100 , similarity 100
        , identity 98.1 , evalue 4.17e-28 , alnlength 54 ,
        Bacteria , Proteobacteria , WP_167482801.1 hypothetical
        protein [Wolbachia endosymbiont of Carposina sasakii]"
gene      complement(24702..24899)
        /locus_tag="wEsol_00716"
CDS       complement(24702..24899)
        /locus_tag="wEsol_00716"
        /codon_start=1
        /transl_table=11
        /fullproduct="qcoverage 100 , hcoverage 100 , similarity
        100 , identity 100 , evalue 1.88e-40 , alnlength 65 ,
        Bacteria , Proteobacteria , WP_010082070.1 hypothetical
        protein [Wolbachia endosymbiont of Drosophila incompta]"
        /translation="MQKNDIRAILRRKFKIKKQQTNDRAVAPNILDQNFIVDQPNKVW
        DYLHQNQGGMAIFGSNNSHVW"
        /product="hypothetical protein"
        /besthit="qcoverage 100 , hcoverage 100 , similarity 100
        , identity 100 , evalue 1.88e-40 , alnlength 65 ,
        Bacteria , Proteobacteria , WP_010082070.1 hypothetical
        protein [Wolbachia endosymbiont of Drosophila incompta]"
gene      complement(25121..25414)
        /locus_tag="wEsol_00717"
CDS       complement(25121..25414)
        /locus_tag="wEsol_00717"
        /codon_start=1
        /transl_table=11
        /fullproduct="qcoverage 100 , hcoverage 100 , similarity
        99.0 , identity 99.0 , evalue 6.55e-60 , alnlength 97 ,
        Bacteria , Proteobacteria , WP_155968835.1 transposase
        [Wolbachia pipientis]"
        /cog="COG2963 COG2963 116 Transposase and inactivated
        derivatives"
        /pfam="HTH_Tnp_1 HTH_23 HTH_28"
        /product="transposase"
        /translation="MVREYTAEFKLEAVKLTNEQRKVGQPVAKVARDLGIRDSVLGKW

```

```

MKKYNEKKSAANAFPDVAPYDKERFDLQSKSNKGKRHLKKSPGQSKRVKYFFI"
/besthit="qcoverage 100 , hcoverage 100 , similarity 99.0
, identity 99.0 , evalue 6.55e-60 , alnlength 97 ,
Bacteria , Proteobacteria , WP_155968835.1 transposase
[Wolbachia pipientis]"
gene complement(25585..26757)
/locus_tag="wEsol_00718"
CDS complement(25585..26757)
/locus_tag="wEsol_00718"
/codon_start=1
/transl_table=11
/pfam="Porin_4"
/fullproduct="qcoverage 100 , hcoverage 100 , similarity
99.7 , identity 99.7 , evalue 4.74e-284 , alnlength 390 ,
Bacteria , Proteobacteria , WP_141456814.1 MULTISPECIES:
porin [unclassified Wolbachia]"
/translation="MKLKYYLVALLSSLFLQNSASSKTILDKEIFYAELDGKIDLRFG
YAFNRDSFNAPKPKDKTSSYSYLRFLYLQQVYPNTQMGVNVKAGVSGIANLKALDIEKL
DMEEWYFIKNQELGSIEYGKRSLSVSQSMINTSKIYAAAGGVNGHWNTNYANLRGDHK
KDGDPGYDQDKVFWVKPNIYSDYNELELGLKQSSINYISPEIYNFQLGFSYVPGKNNL
QYSNLIAAGLSYKNSLSDDIGFTTALTGEFARENLTDCSDGTSKNYECRNQLLHWNFG
LKLKLFDLDCIFS YGNGGKS GEKRN PETNNTYYMNAGIAYRSDSYKSSLT YFSSGRDI
AGEGTNELTSYALSLENSLFLGTSY YFDIVKFSTKEPKIENNNSGYVFLAGLKLSF"
/product="porin"
/besthit="qcoverage 100 , hcoverage 100 , similarity 99.7
, identity 99.7 , evalue 4.74e-284 , alnlength 390 ,
Bacteria , Proteobacteria , WP_141456814.1 MULTISPECIES:
porin [unclassified Wolbachia]"
gene complement(26820..27182)
/locus_tag="wEsol_00719"
CDS complement(26820..27182)
/locus_tag="wEsol_00719"
/codon_start=1
/transl_table=11
/product="hypothetical protein"
/translation="MSPLFLELYVILNFAFQHQINAAIGMIGLNSSCSETNDALKVVI
EHFYKNCRSDDFLGYIDENKVLFLVILINCDVKSTSKIINRIHSAINKQLLMQKLPSVSI
IYG NIAQKQAAKSTSGAF"
/besthit="qcoverage 95.83333333333333 , hcoverage
46.7479674796748 , similarity 100 , identity 99.1 ,
evalue 4.08e-71 , alnlength 115 , Bacteria ,
Proteobacteria , ONI56753.1 hypothetical protein
N500_0192 [Wolbachia pipientis wUni]"
gene complement(27221..27637)
/locus_tag="wEsol_00720"
CDS complement(27221..27637)
/locus_tag="wEsol_00720"
/codon_start=1
/transl_table=11
/fullproduct="qcoverage 100 , hcoverage 88.4615384615385
, similarity 97.1 , identity 96.4 , evalue 1.05e-86 ,
alnlength 138 , Bacteria , Proteobacteria , EAL59419.1
conserved hypothetical protein [Wolbachia endosymbiont of
Drosophila ananassae]"
/translation="MDDFITARRKDDAVVSVCQDNKKKNVLILGLNQAARNLLKYEFG
NLLNKPLINILSARAADDMKNYLEYTENGHDLLDILPKVIDFSLTDAKGEDIRTKVKV
FRTAQFASNKINYELLIRDISLSHKLGI FRDEISNG"
/product="conserved hypothetical protein"
/besthit="qcoverage 100 , hcoverage 88.4615384615385 ,
similarity 97.1 , identity 96.4 , evalue 1.05e-86 ,

```

```

alnlength 138 , Bacteria , Proteobacteria , EAL59419.1
conserved hypothetical protein [Wolbachia endosymbiont of
Drosophila ananassae]"
gene      28218..28658
          /locus_tag="wEsol_00721"
CDS       28218..28658
          /locus_tag="wEsol_00721"
          /codon_start=1
          /transl_table=11
          /product="hypothetical protein"
          /pfam="adh_short_C2"
          /translation="MQCIYRAILFTALAQRAEKMMSSGGGSLTSLSYGAEKVMPNYNV
MGLCKAALEASVKYIACDLGPQNIRVNAISAGPIRTLASSGISDFHFISEWNRNNSPL
RRNVTIEDVGKAALYLLSDLSSGTTGEILHVDSGYNVVG MKVVD"
          /cog="FabI COG0623 259 Enoyl-"
          /besthit="qcoverage 93.8356164383562 , hcoverage
52.6923076923077 , similarity 100 , identity 100 , eval
1.13e-90 , alnlength 137 , Eukaryota , Arthropoda ,
GFY65360.1 enoyl-[acyl-carrier-protein] reductase 1
[Trichonephila inaurata madagascariensis]"
gene      complement(28655..30163)
          /locus_tag="wEsol_00722"
CDS       complement(28655..30163)
          /locus_tag="wEsol_00722"
          /codon_start=1
          /transl_table=11
          /fullproduct="qcoverage 100 , hcoverage 100 , similarity
100 , identity 99.8 , eval 0.0 , alnlength 502 ,
Bacteria , Proteobacteria , WP_015588851.1 MULTISPECIES:
protein translocase subunit SecD [unclassified
Wolbachia]"
          /cog="SecD COG0342 506 Preprotein translocase subunit
SecD"
          /pfam="Sec_GG SecD_SecF MMPL"
          /tigr="TIGR01129 secD 397 protein-export membrane protein
SecD"
          /product="protein translocase subunit SecD"
          /translation="MYNRLIVKSFSVLCICLFLALYITLPNFFDNKLFISKKRINLGLD
LKGGASLLLNIDLDYFKEKLSMLANEIKETLLTKNIESNVQNSIITLNNIDDYKKAS
VLINAINPNLELN RKDSSILISYKPHYKNSLISEVAAESINNVQRRDLKLTKEVSVQ
KQGQNKILVQVPGVEDTKQIKSLLGKTAKLAFHLANTNIAKVQDIDHETTVM LKDSL
NSYPIFRKTEIGGDSL VNASVRFGHLGKPTVHFKFDSIASKRF AKITKENVGKPF
IAIVLDNTVLTVP TIREPILNGEGEISGNFTEKQASELA ILLKSGALPAPLK IIEEKNIG
PSLGEESIKAGEMAATISIIAVALFIIITYGKLGVLASVALFSNVILILSILT LLEATLT
LPGIAGIALTVGMAVDANVLIFERIREEIKSGKRVERAIEEGFKNAIKTILDSNITTL
IAAGIMFIIGSGAIRGFSVTLSIGILCSMFSAITVTKLLIELCMNPKELVLC"
          /besthit="qcoverage 100 , hcoverage 100 , similarity 100
, identity 99.8 , eval 0.0 , alnlength 502 , Bacteria ,
Proteobacteria , WP_015588851.1 MULTISPECIES: protein
translocase subunit SecD [unclassified Wolbachia]"
gene      complement(30668..30820)
          /locus_tag="wEsol_00723"
CDS       complement(30668..30820)
          /locus_tag="wEsol_00723"
          /codon_start=1
          /transl_table=11
          /fullproduct="qcoverage 100 , hcoverage 100 , similarity
100 , identity 100 , eval 6.45e-28 , alnlength 50 ,
Bacteria , Proteobacteria , WP_007548649.1 transposase
[Wolbachia endosymbiont of Drosophila ananassae]"

```

```

/translation="MQENGIKTKLRRRFKNKKQQISNRVVAPNTLDQNFTTDQPNKVW
DYLHKN"
/product="transposase"
/besthit="qcoverage 100 , hcoverage 100 , similarity 100
, identity 100 , evalue 6.45e-28 , alnlength 50 ,
Bacteria , Proteobacteria , WP_007548649.1 transposase
[Wolbachia endosymbiont of Drosophila ananassae]"
gene complement(31044..31175)
/locus_tag="wEsol_00724"
CDS complement(31044..31175)
/locus_tag="wEsol_00724"
/codon_start=1
/transl_table=11
/fullproduct="qcoverage 100 , hcoverage 100 , similarity
100 , identity 100 , evalue 1.06e-21 , alnlength 43 ,
Bacteria , Proteobacteria , ONI56748.1 hypothetical
protein N500_0187 [Wolbachia pipientis wUni]"
/translation="MEKCLEHHTHFQAKAPYDKERFDLKKELIRERDILKKALGKEKE"
/product="hypothetical protein"
/besthit="qcoverage 100 , hcoverage 100 , similarity 100
, identity 100 , evalue 1.06e-21 , alnlength 43 ,
Bacteria , Proteobacteria , ONI56748.1 hypothetical
protein N500_0187 [Wolbachia pipientis wUni]"
gene complement(31175..31309)
/locus_tag="wEsol_00725"
CDS complement(31175..31309)
/locus_tag="wEsol_00725"
/codon_start=1
/transl_table=11
/fullproduct="qcoverage 100 , hcoverage 100 , similarity
100 , identity 100 , evalue 5.41e-20 , alnlength 44 ,
Bacteria , Proteobacteria , WP_007548354.1 MULTISPECIES:
IS3 family transposase [Wolbachia]"
/cog="COG2963 COG2963 116 Transposase and inactivated
derivatives"
/pfam="HTH_Tnp_1"
/product="IS3 family
transposase"
/translation="MTNRREYTAEFKLEAVKLVKETGQASTKIAKDLGIDGSMLSKKI
"
/besthit="qcoverage 100 , hcoverage 100 , similarity 100
, identity 100 , evalue 5.41e-20 , alnlength 44 ,
Bacteria , Proteobacteria , WP_007548354.1 MULTISPECIES:
IS3 family transposase [Wolbachia]"
gene complement(31373..32857)
/locus_tag="wEsol_00726"
CDS complement(31373..32857)
/locus_tag="wEsol_00726"
/codon_start=1
/transl_table=11
/fullproduct="qcoverage 100 , hcoverage 99.3963782696177
, similarity 100 , identity 100 , evalue 0.0 , alnlength
494 , Bacteria , Proteobacteria , WP_065095043.1
MULTISPECIES: IMP dehydrogenase [unclassified Wolbachia]"
/pfam="IMPDH CBS CBS NanE B12-binding His_biosynth PcrB
FMN_dh Glu_synthase DeoC NMO Ribul_P_3_epim His_biosynth
Dus PcrB"
/tigr="TIGR01302 IMP_dehydrog 450
inosine-5'-monophosphate dehydrogenase"
/product="IMP dehydrogenase"

```

```

/translation="MEACYSFDDILLPLPAYSNILPCDADTKTYLTNSIELNIPLISSA
MDTVTESGFAIAIAQHGIGCIHKNLSIDEQVLEVRVVKYESWIVYNPITISPDKTV
AEAISLMREHNYSGIPVVDQKRLVGILTNRDVRFIEDQNMNVKVSEVMTKDKLVTVRE
QGVNSASAMKLLHENRIEKLVLVDENSCCIGLITVKDIEKYNRYPNCKDSKGRLRVA
AAIGTGKKDGIDRCEALIGEEVDVVVDVTAHGHSENVINTIREIKKMPNTQLIGGNI
ATKEAAEALIDAGVDAVKVGIGPGSICTTRIVTGVGVQPQSAIKNVAEACRARNVRLI
ADGGVKYSGDVAKAIAAGADSVMIGSIFAGTDESPGEIIMYKGRAYKGYRGMGSISAM
KRGASRYFQDKDSKLKLVPOGVEGRVPFKGPASGVIHQGLIGGLQAAMGYTGNRNIEE
MKNCKFVTITASGLRESHADIVITQEAPNYAYQTSNLSTDSE"
/besthit="qcoverage 100 , hcoverage 99.3963782696177 ,
similarity 100 , identity 100 , evaluate 0.0 , alnlength
494 , Bacteria , Proteobacteria , WP_065095043.1
MULTISPECIES: IMP dehydrogenase [unclassified Wolbachia]"
gene complement(32983..33636)
/locus_tag="wEsol_00727"
CDS complement(32983..33636)
/locus_tag="wEsol_00727"
/codon_start=1
/transl_table=11
/fullproduct="qcoverage 100 , hcoverage 80.3703703703704
, similarity 100 , identity 99.5 , evaluate 1.69e-148 ,
alnlength 217 , Bacteria , Proteobacteria ,
WP_015588849.1 MULTISPECIES: 16S rRNA
(adenine(1518)-N(6)/adenine(1519)-N(6))-
dimethyltransferase RsmA [unclassified Wolbachia]"
/cog="KsgA COG0030 259 Dimethyladenosine transferase
(rRNA methylation)"
/pfam="RrnaAD"
/tigr="TIGR00755 ksgA 256 dimethyladenosine transferase"
/product="16S rRNA
(adenine(1518)-N(6)/adenine(1519)-N(6))-
dimethyltransferase RsmA"
/translation="MHNPKSLLSIEKDRDLVKHHDQLLNEHQGKYKIIHADALHVIEE
ELIERPVKVIANLPYNISVVLFLKWLNNIKFFTNTLTMFQKEVADRITARPNKSDYGS
LSVLSQLLCDIKKEFDIEPKEFFPRPKIHSSVITVNPLPIPKFAVNLETLTRLTRAFF
SQRRKMLRNSLQNITNHAETVLENAKLSGNQRPENLTIEQFCLLANNVECLFCNKMY"
/besthit="qcoverage 100 , hcoverage 80.3703703703704 ,
similarity 100 , identity 99.5 , evaluate 1.69e-148 ,
alnlength 217 , Bacteria , Proteobacteria ,
WP_015588849.1 MULTISPECIES: 16S rRNA
(adenine(1518)-N(6)/adenine(1519)-N(6))-
dimethyltransferase RsmA [unclassified Wolbachia]"
gene 34000..34698
/locus_tag="wEsol_00728"
CDS 34000..34698
/locus_tag="wEsol_00728"
/codon_start=1
/transl_table=11
/fullproduct="qcoverage 100 , hcoverage 95.8677685950413
, similarity 100 , identity 100 , evaluate 9.59e-166 ,
alnlength 232 , Bacteria , Proteobacteria ,
WP_015588848.1 MULTISPECIES: triosephosphate isomerase
[Wolbachia]"
/cog="TpiA COG0149 251 Triosephosphate isomerase"
/pfam="TIM"
/tigr="TIGR00419 tim 228 triose-phosphate isomerase"
/product="triosephosphate
isomerase"
/translation="MNGMRSSFVDFIGKLNNKSNEITSKLVICPPFTSFPSSELNNN
INIGAQNCHHKKFGSYTGEISAEMLKELGCTYVILGHSERANEKDSEIKLKSEIAIES

```

```

GLHPIICVGENSEDYKNEKTKEVIEYQCKNRLPTHGEYTVAYEPIWAIGTGHVPNNDA
IAKVIEVIKLTSSKKHIIYGGSVSSSENIENTLLSISNLSGVLIGSASLDFDFHYKIIQQ
VEKKFSLINSKISN"
/besthit="qcoverage 100 , hcoverage 95.8677685950413 ,
similarity 100 , identity 100 , evaluate 9.59e-166 ,
alnlength 232 , Bacteria , Proteobacteria ,
WP_015588848.1 MULTISPECIES: triosephosphate isomerase
[Wolbachia]"
gene complement(34922..36010)
/locus_tag="wEsol_00729"
CDS complement(34922..36010)
/locus_tag="wEsol_00729"
/codon_start=1
/transl_table=11
/fullproduct="qcoverage 100 , hcoverage 100 , similarity
100 , identity 100 , evaluate 6.36e-252 , alnlength 362 ,
Bacteria , Proteobacteria , WP_015588847.1 MULTISPECIES:
DNA-processing protein DprA [unclassified Wolbachia]"
/cog="Smf COG0758 350 Predicted Rossmann fold
nucleotide-binding protein involved in DNA uptake"
/pfam="DNA_processg_A Pfam-B_17296"
/product="DNA-processing
protein DprA"
/translation="MKINKLNNKELEVWLSLARTIGPTKFFSILRTHGSLDEVLYKYN
RVANNKVYGIQDAREEINNAERIGAKIIPACDPDYPDLLRNISSCPPVITALGDISLL
SREIIAIIIGRNSMNGRNFANKLALDLSEAGFVIVSGLAKGIDTAANSVIYKNHPTI
AVTASGIDVVYPKENFDLYKKITGNGGLVITELPFATKPKPQYFPQRNRIISGLSLGV
AVIEASKRSGSLITADFALNQGREVFAVSGFPLDSRCSGSNYLIKNGAKLIESADDII
ESIRFSLPPQQKKLFDVEHYAVNQKQEKLQQAQSVIVDHINSVPVDIDELILASGLST
NIALMALLELELENRIERSPGNKISLIF"
/besthit="qcoverage 100 , hcoverage 100 , similarity 100
, identity 100 , evaluate 6.36e-252 , alnlength 362 ,
Bacteria , Proteobacteria , WP_015588847.1 MULTISPECIES:
DNA-processing protein DprA [unclassified Wolbachia]"
gene 36072..36446
/locus_tag="wEsol_00730"
CDS 36072..36446
/locus_tag="wEsol_00730"
/codon_start=1
/transl_table=11
/pfam="Fer4_11 Fer4_6 Fer4_10 Fer4_2 Fer4_4 Fer4_7 Fer4_9
Fer4_10 Fer4 Fer4_6 Fer4_2 Fer4_15 Fer4_8 Fer4_4 Fer4_17
Fer4_16 DUF3470"
/fullproduct="qcoverage 100 , hcoverage 100 , similarity
100 , identity 100 , evaluate 4.06e-87 , alnlength 124 ,
Bacteria , Proteobacteria , WP_141456813.1 MULTISPECIES:
ferredoxin family protein [unclassified Wolbachia]"
/translation="MTHFVTDKCIKCKYTDCVEVCPVDCFYEGKNMLVINPDECIDCG
VCIPECPVDAIVTDDSIKDILELDEELLNSEQKIFKSFYNINVEYSQKWPNITAKKQP
LYTAEYKEKKDKTTYFEENLE"
/product="ferredoxin family
protein"
/besthit="qcoverage 100 , hcoverage 100 , similarity 100
, identity 100 , evaluate 4.06e-87 , alnlength 124 ,
Bacteria , Proteobacteria , WP_141456813.1 MULTISPECIES:
ferredoxin family protein [unclassified Wolbachia]"
gene 36640..37092
/locus_tag="wEsol_00731"
CDS 36640..37092
/locus_tag="wEsol_00731"

```

```

/codon_start=1
/transl_table=11
/product="hypothetical protein"
/translation="MSINKRETIKKIEGLLFQANGNLEKTCDLLSTVKLTEDDIKILL
EEMIKEYYSLFKKISWSCGITAGGAQDANASSFNEAYKLGSKELALAIMSDFKKSVDQ
ELFKKYKKEEMSYPEGEGVQFIRELRVLSRILTISLIRKLDEVYSRRN"
/besthit="qcoverage 97.33333333333333 , hcoverage
55.9386973180077 , similarity 100 , identity 100 , evaluate
3.56e-93 , alnlength 146 , Bacteria , Proteobacteria ,
WP_015588845.1 MULTISPECIES: hypothetical protein
[unclassified Wolbachia]"
gene 37067..37417
/locus_tag="wEsol_00732"
CDS 37067..37417
/locus_tag="wEsol_00732"
/codon_start=1
/transl_table=11
/product="hypothetical protein"
/translation="MKFTPEEIERLKEYILVSNYDTSKSLSDIDKYMHALSALIRNPS
LDTKKIFELNNRMIIHTTALIDLVTSGVVKKEEAKESAEADLEKLVCEQYKGAANTPV
PLPSTLFEVDKKSA"
/besthit="qcoverage 99.1379310344828 , hcoverage
44.0613026819923 , similarity 100 , identity 100 , evaluate
2.25e-70 , alnlength 115 , Bacteria , Proteobacteria ,
WP_015588845.1 MULTISPECIES: hypothetical protein
[unclassified Wolbachia]"
gene 37513..38460
/locus_tag="wEsol_00733"
CDS 37513..38460
/locus_tag="wEsol_00733"
/codon_start=1
/transl_table=11
/fullproduct="qcoverage 100 , hcoverage 100 , similarity
100 , identity 100 , evaluate 5.46e-227 , alnlength 315 ,
Bacteria , Proteobacteria , AGJ99620.1
D-alanine--D-alanine ligase [Wolbachia endosymbiont of
Drosophila simulans wHa]"
/cog="DdlA COG1181 317 D-alanine-D-alanine ligase and
related ATP-grasp enzymes"
/pfam="Dala_Dala_lig_N ATP-grasp_4 RimK CPSase_L_D2
Dala_Dala_lig_C"
/tigr="TIGR01205 D_ala_D_alaTIGR 318 D-alanine--D-alanine
ligase"
/product="D-alanine--D-alanine ligase"
/translation="MVPTIAILSGGFSCEREISLMSGKAVKKALDSLSYNAIEIDVDS
NIAEKLKINSGLAFIALHGPYGEDGCIQGLLEILGIKYTHSGVMASAVAMNKVMSKH
IFRSLSIDTPKGYVISREDLLKNNIKIDYPYVLKPINEGSSIGVYIIFSHEDYLELKD
NSSTIMEKMIVEEYIPGIELHTAVLLDEAIGTIEVRPKNKFYDYEAKYTDGFAEHIFP
AEIPNNIYKMTLEHALKVHQFLGCKTISRSDFRYNPKNNTLKMLEINTHPGFTELSLV
PEIAKLAKGINFNELVKIIIEDSLQHKNIIRDLSHVEQYY"
/besthit="qcoverage 100 , hcoverage 100 , similarity 100
, identity 100 , evaluate 5.46e-227 , alnlength 315 ,
Bacteria , Proteobacteria , AGJ99620.1
D-alanine--D-alanine ligase [Wolbachia endosymbiont of
Drosophila simulans wHa]"
gene 38441..39199
/locus_tag="wEsol_00734"
CDS 38441..39199
/locus_tag="wEsol_00734"
/codon_start=1

```

```

/transl_table=11
/fullproduct="qcoverage 100 , hcoverage 100 , similarity
100 , identity 100 , evalue 3.42e-178 , alnlength 252 ,
Bacteria , Proteobacteria , WP_174516959.1 FtsQ-type
POTRA domain-containing protein [Wolbachia endosymbiont
of Cardiocondyla obscurior]"
/cog="FtsQ COG1589 269 Cell division septal protein"
/pfam="POTRA_1 FtsQ"
/product="FtsQ-type POTRA
domain-containing protein"
/translation="MLSSITRSQRSFLRKALVIITLFLKLILYSSLDKIINRFNYY
FTWYNDCLSSLLSSGFSIDEVVVSGNKFVNKKDILSLTDRTQPILYISLSKLAGNIQ
SVSRWIKHVRVHRILPNTLHINIDEHKPFALWKDNNKTSVIDFEGKVI VDDYLVDDL
VIKGQNSLSNLEFVRDVLESKTQLRDHISFAYIGNRRWNIILDNDSTVKLPEDNPYS
AWDYLNHLHNTTDFTFSDWSIIDMRITDKIFVKR"
/besthit="qcoverage 100 , hcoverage 100 , similarity 100
, identity 100 , evalue 3.42e-178 , alnlength 252 ,
Bacteria , Proteobacteria , WP_174516959.1 FtsQ-type
POTRA domain-containing protein [Wolbachia endosymbiont
of Cardiocondyla obscurior]"
gene 39888..40994
/locus_tag="wEsol_00735"
CDS 39888..40994
/locus_tag="wEsol_00735"
/codon_start=1
/transl_table=11
/fullproduct="qcoverage 100 , hcoverage 100 , similarity
100 , identity 100 , evalue 2.43e-259 , alnlength 368 ,
Bacteria , Proteobacteria , WP_010082605.1 MULTISPECIES:
D-alanyl-D-alanine carboxypeptidase [Wolbachia]"
/cog="DacC COG1686 389 D-alanyl-D-alanine
carboxypeptidase"
/pfam="Peptidase_S11 Peptidase_S13 Beta-lactamase2
BBP5_C"
/product="D-alanyl-D-alanine
carboxypeptidase"
/translation="MLSRLVILLLVFILPFSSYSYQFRTKAKQAVVLDLASDSFIFDH
NSDEKMAPSSMSKLMTLIAFDYLYKAGIIHMEDKFRVSRKAWERRGSSMFLKEGQSVT
VRELLEGITIVSGNDACITLAEGIAGSEENFVAEMNEVAQNLNLDNSHFVNSSGWPDE
DHFMNAKDLVMLAKRIFTDFPEYYDLFSEQYLYTYNEIVQKNKNNLLLFHDIGVDGLKTG
YTNAAGGYGIVASAKRNDRRIFAVVNGLNTEKERIEEAKRLIQYSLNHFNTKKIFVKDS
VVEEVNVLYGKDRKVPITVANDVTITYNRKLHDQIKVRIEYKDMIPAPIKKGQEVGKV
FVEIPGIEQQTTPLYAANDVQELNFVEKFFRMLF"
/besthit="qcoverage 100 , hcoverage 100 , similarity 100
, identity 100 , evalue 2.43e-259 , alnlength 368 ,
Bacteria , Proteobacteria , WP_010082605.1 MULTISPECIES:
D-alanyl-D-alanine carboxypeptidase [Wolbachia]"
gene 41094..41408
/locus_tag="wEsol_00736"
CDS 41094..41408
/locus_tag="wEsol_00736"
/codon_start=1
/transl_table=11
/fullproduct="qcoverage 100 , hcoverage 100 , similarity
100 , identity 100 , evalue 8.97e-59 , alnlength 104 ,
Bacteria , Proteobacteria , WP_010082606.1 MULTISPECIES:
hypothetical protein [Wolbachia]"
/cog="EmrE COG2076 106 Membrane transporters of cations
and cationic drugs"
/pfam="Multi_Drug_Res"

```

```

/product="hypothetical protein"
/translation="MCWLYLLLSSILEILWAVTLKFSNSFTKVVPSIATLVIMIISIY
FLSLAACFLPIRVCYAVSSGICTIGITIIGATTFTENINLSQVLCIVLIVIGSIGLKL
SI"
/besthit="qcoverage 100 , hcoverage 100 , similarity 100
, identity 100 , evalue 8.97e-59 , alnlength 104 ,
Bacteria , Proteobacteria , WP_010082606.1 MULTISPECIES:
hypothetical protein [Wolbachia]"
gene 41425..41769
/locus_tag="wEsol_00737"
CDS 41425..41769
/locus_tag="wEsol_00737"
/codon_start=1
/transl_table=11
/fullproduct="qcoverage 100 , hcoverage 100 , similarity
100 , identity 100 , evalue 1.17e-70 , alnlength 114 ,
Bacteria , Proteobacteria , WP_006279756.1 MULTISPECIES:
multidrug efflux SMR transporter [Wolbachia]"
/cog="EmrE COG2076 106 Membrane transporters of cations
and cationic drugs"
/pfam="Multi_Drug_Res"
/product="multidrug efflux
SMR transporter"
/translation="MNWIYLLLSSLIEVFWVITLKHSYGFTHLVPSIISILSMALSTY
LLSLATRSIPIGVCAIWTGVGAIGASILGVYLFDEPVNLFVEVICFILVTFGIIGLKL
FDTAKQTVDKME"
/besthit="qcoverage 100 , hcoverage 100 , similarity 100
, identity 100 , evalue 1.17e-70 , alnlength 114 ,
Bacteria , Proteobacteria , WP_006279756.1 MULTISPECIES:
multidrug efflux SMR transporter [Wolbachia]"
gene 42313..42597
/locus_tag="wEsol_00738"
CDS 42313..42597
/locus_tag="wEsol_00738"
/codon_start=1
/transl_table=11
/fullproduct="qcoverage 100 , hcoverage 100 , similarity
100 , identity 100 , evalue 1.51e-59 , alnlength 94 ,
Bacteria , Proteobacteria , AAS13858.1 hypothetical
protein WD_0102 [Wolbachia endosymbiont of Drosophila
melanogaster]"
/translation="MNLSWRGYRLIAADGSGMRLPSSGEIVSEFEPNGTTGTIGNLFV
DLCTSLICSARLAAWNIGEQTAAEQLP EVITQMRLLNQEKLLFIYDRLQ"
/product="hypothetical protein"
/besthit="qcoverage 100 , hcoverage 100 , similarity 100
, identity 100 , evalue 1.51e-59 , alnlength 94 ,
Bacteria , Proteobacteria , AAS13858.1 hypothetical
protein WD_0102 [Wolbachia endosymbiont of Drosophila
melanogaster]"
gene 33873..33945
/locus_tag="wEsol_tRNA-14"
tRNA 33873..33945
/locus_tag="wEsol_tRNA-14"
/gene="tRNA-Thr"
/intronpos="0..0"
/program="tRNAscan-SE"
/cove_score="73.6"
/evidence=predicted
/type="Thr"
/anticodon=TGT

```

```

gene      /product="tRNA-Thr (TGT) "
          complement(4729..7504)
rRNA      /locus_tag="wEsol_rRNA-1"
          complement(4729..7504)
          /locus_tag="wEsol_rRNA-1"
          /product="23S ribosomal RNA"
gene      complement(4566..4670)
          /locus_tag="wEsol_rRNA-2"
rRNA      complement(4566..4670)
          /locus_tag="wEsol_rRNA-2"
          /product="5S ribosomal RNA"

```

# ORIGIN

```

1  acttcttgtg cattaccatc ttctacagct aggaataatt gttcttcctg tgtttttacg
61 cgtgtttcca ctagatat aaaaaataac aataactaac atgcaatacc aataatgcta
121 atatatatta taacttttct cataagatat ttacaatgc ttctaataat attagatatc
181 atctataaaa ttaaaaaatc catgaaaggg gatgaaaata tgtaaaaaag tattattgat
241 taattaaaaa cagattttga ttgataata ctaataaaat cgatttatct taaatttacg
301 ttgattttta cctgttat ttgtagttt atccaacgta aattccaggt aaacaaaagt
361 cgttatctcc aaccgttaca accaactctc cttctttaat tttattttga ttaggtgat
421 ggtcccatc catcacactc tgggatcata cacctaaagt actccgacac tgggatgaca
481 ccccggggtt tctgggatga caaaaagag cccctgagc aaaaatctta tagccacttg
541 aatgataatt gactttttac ctaaaataac taagaaagaa acttctcatc aagataactt
601 aaatatatac taattctctt atttttaaac gatttctcat catgaattgc acgatcaaaa
661 acctgaattt gacttggtat aatgctacaa ttattatttg caacttctaa tacgccacta
721 tcaattacaa cttcttttct tatttggtta ctcattttaa cagtaatcat accaggcaat
781 aaataaatta agtaaggagc atggtgagct aaaatcataa gctccccttc gagcccagtt
841 actgaaagag aaaccactcc actgaatgaa atttgatcat caggagagaa aaattgcact
901 ttaaaagtat tcataatctt taacttttat ttagcttcag cttgtattaa ttcagccttt
961 tttattgctt catctatatt ccccaccata taaaagcag cctctggtaa gtgatcatat
1021 ttgccttcaa caatcccttt aaaactggaa acagtatcag aaagtgaac aaatttacca
1081 ggcatgccag taaatatattc tgcaacgtga aaagggtgag aaagaaattt ctgaatctta
1141 cgagccctat caacaataat tttatcttca tcagatagct catccatacc aagtattgcg
1201 ataatatctt gcagtgat ttatagtttg aatatacggt tcacctcaga agctacatta
1261 taatgttctt caccaatgat ttcagcagat aaagactgag aagttgaatc aagtggatca
1321 acagcagggt atattcccat ttcagctatt tgccttgaca acactgtggt tgcacaaagg
1381 tgagagaatg tagttgctgg ggctggatca gttaaatcgt ccgcaggaac atatatagct
1441 tgcacagaag taatagagcc agaagttggt gaagctattc tttcttgcat tgcaccata
1501 tcagttgcaa ggggttggtg ataaccaaca gctgacggtt ttcttccaag taaagcagaa
1561 atttcagaac cagcttggtg aaatctaaag atattatcca caaaaaatag aacatcttgg
1621 ttttcacggt cacgaaaata ctctgccata gtaagtgtg ttaaagcaat tctagccctt
1681 gctccaggag gctcattcat ctgaccataa accaaaacag cttgagattt ttcattgctc
1741 tttatatatta ttacatttga agtgatcatc tcgtgataaa gatcgttacc ttcacgcggt
1801 ctctccccta ccccgccaaa cacagaaaat cttttatgag cttttgctat attattaatt
1861 aattccatta ttaggactgt tttaccaaca ccggtccac caaataagcc aatttttctt
1921 cttttaagat aagggtgcaag aagatctata acttttatcc ccgtaactaa aacttcttcc
1981 tgtattctct gttcagtaaa acttgagggt gctctgtgta taggctctaa gttatacttt
2041 cccttcagtg gaccacactc atctataagc tctccaacaa cattaaaaat ccttcctaaa
2101 gttgaacgcc caattggcac cgatattggt gcacctgtat caacaaattc atccccctt
2161 gacatgccat ctgtgctatc catagcaata caacgaacta tattgtcacc tatatgctgc
2221 gaaacttcta aaaccagctc cttatcctta tattttagtt tgctttttta agcattaaat
2281 attttaggca attcaccttc aaattttata tcaacaactg cttgagttac cttaatcgct
2341 ctacctatat tcatctcttt atttttatca cctaacacta taattccata aaagaacttc
2401 taaagaaaat aaattttata ttattaatag aaattttgca acattaaaac gcttactagt
2461 tacgcttcat tacaacaat gcaaatgcat ttaatagcca agtaataata aacaatacta
2521 aactaagcgc ataagcagca agagtttgta cactattgaa atcctgatct ccggtaaagta
2581 atgtagcgat ctgcacggtg atggtagtaa ctgaattaag aggggttaaaa gtcaaatgtg
2641 cgttgattcc cacagccatt agcacaatca ttgtttcacc tatcactctt gaaattgaca
2701 ataaaattgc acttaaaatt gtaggcattg cataagggat tgttatatgc catatagttt
2761 ccgctggagt tgcaccaagt gccatgaagc cataacgcaa gctttttgga acagatctta
2821 tggcatcttc gagtaaagaa ataataaaag gaagaatcat tatcccaatc gataaaccgg

```

|      |            |             |             |             |             |             |
|------|------------|-------------|-------------|-------------|-------------|-------------|
| 2881 | caactaaggc | actttctgag  | tgtatactta  | aacccaaaaa  | atttgctacc  | tgctttataa  |
| 2941 | agaaagacaa | aaacacaacc  | gcgaaatatc  | catatacaac  | cgtaggaata  | gcagacaaaa  |
| 3001 | cttgcaaagt | tgtattaaca  | atataacgca  | ctttctcact  | cgcataattca | ctaatatata  |
| 3061 | ttgcagaaaa | taaaccaagc  | ggaacgacaa  | ctaacattgc  | tataatagtt  | ataagtaatg  |
| 3121 | taccaactaa | aagcggcgct  | ataccaaaac  | atcctatctt  | ctcttcattg  | atagtgacta  |
| 3181 | cattgtggcc | ccatttcaag  | caaaacaaga  | attctgaaat  | agctacttta  | ttaaaaaac   |
| 3241 | taatggattg | aataaaaata  | gacagcatta  | taaataaagt  | gataaaaaat  | gatatggcca  |
| 3301 | aagccacaaa | taacgaaagt  | tttattatct  | tatttctttt  | atttttaaag  | ataaaagcaa  |
| 3361 | gcatgaaaaa | aagtaacgct  | atagaaataa  | aagttacaaa  | acaattatta  | tagaatacta  |
| 3421 | acaaccaagt | tagcatccat  | acacaactaa  | gatatagata  | agatttaacc  | ttatttactt  |
| 3481 | cttgaaacct | actaaaacaa  | aataaaaagga | ttagtaagac  | aggtatgact  | atcaccgaat  |
| 3541 | tcattcttcc | atgcatcaaa  | ttttattcta  | cgaaaatgtc  | atacaagttc  | accattattt  |
| 3601 | gacaataaag | taaaacaatt  | taaaataaat  | aattatatta  | atataaaaaa  | aatgaagaga  |
| 3661 | acatttcaac | caaaaaattt  | gataagaaag  | cgcagacacg  | gatttcgttc  | acgtatggca  |
| 3721 | acaagagctg | gaagaaaaat  | ccttaatagg  | cgccgttcat  | taggggtgtaa | caaattatgc  |
| 3781 | gcatagtaag | tataaaaaaa  | aagatttttc  | ttctgctttc  | aaaaataagt  | tagcactcaa  |
| 3841 | cagtcttttt | tatcgtgggc  | tttatatatc  | actgtacgct  | ataaaaagaaa | gagaacctga  |
| 3901 | aaagtacatt | catactatta  | gagtaggtct  | ggctatcagt  | aaaaaaaccg  | gaaaagcagc  |
| 3961 | aaaaagaaat | aaaataaaaa  | ggcaactacg  | aatgcttgct  | aaaattagca  | ttttaaatat  |
| 4021 | aagtaatata | gggcactact  | acataatact  | aactcataga  | aacattatgc  | aagcaagtta  |
| 4081 | taaaaattta | caaaaagatc  | taactatttg  | cttaaaaaag  | ataaaaataaa | aaaaaatctc  |
| 4141 | aattaaggta | tttacaacta  | tattttttat  | gataaatatag | gtaaaatttt  | taaaaatagt  |
| 4201 | taatgggtgt | gatgaatggt  | agagcatata  | aaagaggtaa  | ataacacagg  | ctttggtcag  |
| 4261 | atgtatcaat | tcttattttct | tcctaaagga  | acaggaacag  | attggagggtc | agcatttcgc  |
| 4321 | caacaagaag | aattatttta  | aaaagtggga  | ggtaatgtaa  | tattaccaga  | aatcagtaat  |
| 4381 | tctccttcaa | aagggaatca  | attaggggaa  | gtaggaacaa  | tgctaaataa  | tgtagaaaat  |
| 4441 | gaccaagaac | atataagaaa  | aaaaagatat  | catagttaaa  | gtaaaaactt  | aaagaatagt  |
| 4501 | aacaaaacaa | gaaagttaaa  | atataagtat  | acctactgtc  | taattaacaa  | agaaattttt  |
| 4561 | ataaacttgg | cgacgacct   | ctctcccttt  | tcaagtacca  | tcagcgctaa  | aaagtttcac  |
| 4621 | ttccgagttc | gagatgagat  | cgggtgggtc  | atttttgcta  | tagccacca   | gtcaataaaa  |
| 4681 | atttctaact | taacaatttt  | aacttaatat  | ttaacactgc  | atacacacat  | atagaaagca  |
| 4741 | aataaatcaa | tcaggctatt  | agtactagtt  | agcttcacat  | gttaccatgc  | ttccacacct  |
| 4801 | agcctatcaa | cgtggtagtc  | ttccacggcc  | ttaattggga  | aatctttttg  | aagagggttt  |
| 4861 | cttgcttata | tgctttcagc  | aattatccca  | tctatacata  | gccaccacgc  | gatgctattg  |
| 4921 | gcataacagc | tggtacacca  | gaggtatata  | catctcggtc  | ctctcgtact  | agagtcagac  |
| 4981 | cttctcaaat | ttccttcacc  | cacggcagat  | agaaaccgaa  | ctgtctcacg  | acgttctaaa  |
| 5041 | cccaactcac | gtatcacttt  | aatcggcgaa  | cagccgaacc  | cttgggacct  | tcttcagccc  |
| 5101 | caggatgtga | tgagtcgaca  | tcgaggtgcc  | aaacggtgtc  | gtcgctatga  | acgctcgaac  |
| 5161 | accatcagcc | tgttatcccc  | ggcgtaacct  | ttatccgttg  | agcgatgacc  | cttccataca  |
| 5221 | gaatcacccg | atcactatga  | ccgactttcg  | tctctgcttg  | gcttgtcagc  | ctcgcagtca  |
| 5281 | ggcaagctta | tgccattata  | ctatcaagct  | gattttccgac | cagctctagc  | ttaccttcgc  |
| 5341 | acgcctccgt | tacttttttag | gaggcgaccg  | ccccagtcaa  | actaccaccc  | atacaatgtc  |
| 5401 | ctagttccag | ataatgaaac  | atagttagat  | atcaaaaagt  | taaaagggtgg | tatctcaagg  |
| 5461 | ttgactccat | tatagctagc  | gccataactt  | caaagtctcc  | cacctatcct  | gcacatcaca  |
| 5521 | cttttaatat | caatgtaaa   | ctatagtaaa  | ggtgcacggg  | gtctcttcgt  | ctaaccgcgg  |
| 5581 | gtaccccgca | tctgcacggg  | gaattcaatt  | tcgctgaagt  | gatgttggag  | acagtggaga  |
| 5641 | aatcgttacg | ccattcgtgc  | gggtcggaa   | ttacccgaca  | aggaatttcg  | ctaccttagg  |
| 5701 | accgtcagtg | ttacggccgc  | cgtttactgg  | ggcttcaatt  | cggagettgc  | acccttccta  |
| 5761 | ttaaccttcc | agcaccgggc  | aggcgtcaga  | ccctatactt  | ccacttacgt  | gtttgcagag  |
| 5821 | tcctgtgttt | ttagtaaaca  | gtcgctactc  | cctattttgt  | gccacctact  | catagttgcc  |
| 5881 | taaaagcagg | ttacccttct  | tccgaagtta  | caggtataat  | ttgccgagtt  | ccttcaacat  |
| 5941 | cattctttca | acaccttagt  | atactctact  | catccaccag  | tgtcggtttg  | cggtagcgcc  |
| 6001 | tcataaatat | aagtgtctatt | tcctggagct  | tcttttaagc  | atagatcaat  | ccaataagat  |
| 6061 | ctatacaaat | acgaaacccg  | tcacacttaa  | gaggttttag  | aatattaacc  | taattgccat  |
| 6121 | cgactactcc | tttacggact  | cgccttagga  | accgactaac  | cctacgcaga  | ttaacttaac  |
| 6181 | gtaggaaccc | ttagattttt  | ggtgagagtg  | tttttcacac  | tcttttacgc  | tacttatgtc  |
| 6241 | agcatttctc | cttccgatat  | ctccagcagt  | tttcacaaac  | caccttcaca  | gacttacgga  |
| 6301 | acgctccgct | accgcgccta  | ttgatcgaaa  | tcaataagca  | ctcacatctt  | cgggtatacag |
| 6361 | ctttagcccc | ggtacatttt  | cggcgcagaa  | aaacttattt  | agacaagtga  | gctgttacgc  |
| 6421 | tttcttttaa | ggatggctgc  | ttccaagcca  | acctcctagc  | tgtaatgggt  | tttctacttc  |

|       |             |             |             |             |             |             |
|-------|-------------|-------------|-------------|-------------|-------------|-------------|
| 6481  | cttccccact  | tagctgtaat  | tttgggacct  | tagatagtga  | tctggggttgt | ttccctcttc  |
| 6541  | accacggact  | tagcaccggt  | agtgtgcctg  | ctatataatt  | aattggttgg  | attcggagtt  |
| 6601  | tagttagatt  | tggtaagacg  | gtgaatcccc  | ctagtctatc  | cagtgtctcta | cccccaacaa  |
| 6661  | catacatata  | acgctctacc  | taaatagatt  | tcgcgagaga  | ccagctattt  | ccaagtttga  |
| 6721  | ttggcctttc  | acccctaata  | acaactcatc  | caataatggt  | gcaacattaa  | ctggttcgat  |
| 6781  | cctccagtgt  | gttttaccac  | accttcaatc  | tggtcatgac  | tagatcactt  | ggtttcgggt  |
| 6841  | ctaataccata | aaactaaaac  | gccctattca  | gacttgcttt  | cgctacgcct  | acacctaacg  |
| 6901  | gcttaagctt  | gcttcataga  | ttaactcgct  | gacccattat  | gcaaaaaggta | cgctgtcact  |
| 6961  | ctaaatatca  | ataaattgat  | atagagctcc  | aactgtttgt  | aagcacttga  | tttcagattc  |
| 7021  | tatttcactc  | ccctcccggg  | gttcttttca  | cctttccctc  | acggtacttg  | ttcactatcg  |
| 7081  | gtcgttaagg  | agtatttagg  | cttggaggat  | gggtccccc   | tattcaaaca  | ggatttcacg  |
| 7141  | tgccccgctc  | tactcaagga  | tttaaaaact  | ttctacttat  | acaggactat  | caccttctat  |
| 7201  | ggttactatt  | tccagagtat  | tctaattctt  | attcttaaat  | cactagcctt  | ttccgctttc  |
| 7261  | gctcgtcact  | actaacagaa  | tctcggttga  | tttcttttcc  | tttggctact  | tagatatattc |
| 7321  | agttcaccaa  | gtttgcttta  | catacttagt  | acgtaataac  | tagctaaact  | agttgggttt  |
| 7381  | ccccattcgg  | aaatctgcgg  | atcaaaaatt  | gttgacaatt  | ccccacagct  | tatcgcagcc  |
| 7441  | tgccacgtcc  | ttcatcgcct  | cttaacgcca  | aggcatccat  | caagtgtctc  | taataattta  |
| 7501  | tttatccgac  | tatatgcaga  | atatgcagag  | ttaaatatta  | ttaaaattga  | attgagatta  |
| 7561  | aattaatctc  | taccataaaa  | cttgtcaaac  | atctaaaaac  | taaattaatc  | ttttatatgt  |
| 7621  | tataacctaa  | taaataatat  | gtcaacgcct  | ttttgcacaa  | aacatttact  | tatatattca  |
| 7681  | acaacaatat  | actagcaatc  | ctaaacagta  | taatctgaga  | aatatgtggg  | aaacttatat  |
| 7741  | atacagtaaa  | aattaataaa  | aaagatattt  | tgtaagataa  | aatgtgttaa  | aatcaattgc  |
| 7801  | ctaaaaatga  | taataaacat  | tcggagtatt  | tctaacgtat  | gaaaagtaat  | ctctctttta  |
| 7861  | taaaaaacgt  | tgcttttaaat | tgtatgtcta  | agctcattgg  | cgtattaaat  | attaagaaag  |
| 7921  | taaaacactt  | cattgtgaat  | aaatataata  | ctcttcataa  | agaaatgaca  | gtgcttctta  |
| 7981  | aaaaatctaa  | gaacctgtta  | aacaccaaca  | ttgaaatcgg  | tttatatcac  | ttttataaag  |
| 8041  | gtagcatatc  | agatgcaaag  | ttacgatttt  | ggttaattag  | catattttac  | ccccatttac  |
| 8101  | ctatagtctg  | gtataacatc  | ggaaggtgtc  | attttgcggt  | aggggaatac  | aacaaagctt  |
| 8161  | ataattattt  | aacaagggca  | ctaaaattag  | ataatgacca  | cgaggaggcg  | tcttactata  |
| 8221  | taaaaaaaaa  | gacaaactca  | gcgcctatta  | cagaattgcc  | aaaaaacctc  | ataagacaat  |
| 8281  | attttgatta  | cacagggtgaa | tattttgttg  | agcattgggt  | gattgccaaa  | caatatagag  |
| 8341  | ggcatgaact  | tgtacacatg  | ataattacaa  | aaatcttcaa  | caactccact  | tctgagctca  |
| 8401  | atatactcga  | ccttggttgt  | ggaactggaa  | tatgtgggtca | tttcttgaaa  | ataaatagta  |
| 8461  | ttggaaacca  | tataatagga  | attgacattt  | caagtagaat  | gctaaatatc  | gcaagaggat  |
| 8521  | gctttataaa  | aggtaagcct  | gtttacaatg  | aattaatata  | tatggaaatg  | aaagagtttc  |
| 8581  | ttaaacaaga  | gaaaaaccag  | cagtatgatg  | taattatctt  | tgctgaagtg  | ctacattatc  |
| 8641  | tacatgactt  | tcaagaagaa  | ttggaattag  | caaaaagatc  | tacgagcaaa  | aaaggggtta  |
| 8701  | ttgtatgttt  | aataagaaga  | aaggaaggtg  | aagggtattga | ctttgtaaat  | aaaggagact  |
| 8761  | attttcgtca  | ctcagaaaagt | tatgttcaac  | atgttgcaaa  | agaaataaat  | atgcaaataa  |
| 8821  | gttatatgag  | ttactgtaaa  | atatatggca  | gtcagggttg  | cggtatcttg  | tttgcatcac  |
| 8881  | agcatcaaca  | agaaaatccg  | aaaaaccta   | cttaaaaaatc | gctcaaaaatg | actttttaagt |
| 8941  | atctatatat  | aataaaaaga  | taaaaggaac  | tttatgaata  | acattaccat  | taattacgca  |
| 9001  | aaggacagca  | aattaaccga  | ctttggaaaa  | gcagttctat  | cagacaggta  | tttaatatga  |
| 9061  | aatgaaagtt  | atcaagacct  | ctttgcacgt  | attgctaatt  | actattctga  | taataaagaa  |
| 9121  | catgcgcagc  | gtcttttatga | ctacatgagc  | aacttggtgt  | tcatgccttc  | aacaccaata  |
| 9181  | ctcagcaatg  | gtggcactaa  | gagagggtta  | cctatctctt  | gctttcttaa  | tgaaaccgaa  |
| 9241  | gacagcttgc  | agggaatagt  | tgatctatgg  | aatgaaaatg  | tttggcttgc  | tgacagtgga  |
| 9301  | ggaggcatag  | gtagtatttg  | gggaaattta  | cgctcaatag  | gcgaaagcgt  | aaagggtagc  |
| 9361  | ggcaaaacat  | caggaattgt  | tccattttat  | gtagtcaaaa  | atgctctaac  | gcttgcaatt  |
| 9421  | agtcagggat  | ccctaaggcg  | agggaagttca | gcagctctacc | ttcctgtatc  | tcatccggag  |
| 9481  | atagaagagt  | ttctagattt  | acgcaagcca  | acaggcggtg  | acccaaatcg  | caaagcggtta |
| 9541  | aatatacatc  | atgctgtaat  | agtaacagat  | aaatttatgc  | aggctgttga  | gaatgatcaa  |
| 9601  | gaatggaatt  | taataagccc  | tcacaacaat  | aagggttattt | caactgtaaa  | agcgcgggat  |
| 9661  | atatggatca  | aaatattaac  | agcaagagtt  | gaaactggag  | aaccttacat  | tattttcctt  |
| 9721  | gatgcaacaa  | ataacaataa  | gccagaatct  | tacaaaaaagc | tcaacttaga  | catcaagatg  |
| 9781  | tcaaactctat | gcagtgaat   | aactttaacc  | acagggttatg | atcacctgaa  | taagtcacgc  |
| 9841  | actgctgtgt  | gttgtctatc  | atccgtaaac  | cttgagtact  | acgaagaatg  | gaaagacaat  |
| 9901  | aaactcttca  | tagaagatat  | aatgcgcttt  | cttgataatg  | tattggaaga  | tttcataaat  |
| 9961  | aaagcaccga  | atgaaatgca  | gcgagcaaaa  | tattctgcag  | ccagagaacg  | cagtattggg  |
| 10021 | cttgggtgtga | tgggcttttca | ctcatttttta | caaagcaaaa  | tggttccttt  | tgaatcagta  |

|       |             |             |              |              |             |             |
|-------|-------------|-------------|--------------|--------------|-------------|-------------|
| 10081 | acagcacaac  | aatggaataa  | aaaaatattt   | aagtattttac  | gcgagcaagc  | agatatagtt  |
| 10141 | tctaaaaaat  | tagcagaaga  | aaagggagca   | tgttctgatg   | ccaaagaagt  | tgatctaagt  |
| 10201 | gaaaggttta  | cacacaaact  | cgctattgct   | cctactgctt   | cgatctccat  | tattgcaggt  |
| 10261 | aatacctctc  | ctggaataga  | accatatgca   | gcaaacgtat   | tcatacaaaa  | gacacttaca  |
| 10321 | ggctcatttg  | tagtgcgaaa  | taaattcttg   | caaaaactat   | tagcagaaaa  | aatcaagac   |
| 10381 | aatgataaaa  | tatgggtctt  | aatttcaaca   | aacgaggggt   | ccgttcagca  | tttagatttt  |
| 10441 | cttagtgagc  | atgaaaaatt  | gacattttaa   | acagcgtacg   | agcttgacca  | aagatggatt  |
| 10501 | atagaacatg  | caagtgatag  | aacttcgtat   | atttgtcaat   | ctcaatcagt  | aaatctgttc  |
| 10561 | ttacctgcca  | acgtacataa  | acgttacttg   | cacaaaatac   | acatgcttgc  | ttggaaaaaa  |
| 10621 | ggattgaaga  | gcttatatta  | ctgcagatca   | caatcaatgc   | agagagccga  | taaggtctcg  |
| 10681 | catgacatat  | tcaaaaaaag  | tgaaatattg   | caacaaaaaa   | cagatattga  | ctacgatgaa  |
| 10741 | tgtctgtcat  | gccaatagcg  | gccttactca   | aaaaagtaga   | gagaaagtta  | agcaaatggg  |
| 10801 | taaatagact  | tcttgcataa  | ccatataacg   | cacttttatt   | gggaatagaa  | acgaaaaaac  |
| 10861 | tttcttgaca  | aactccgcca  | gccctcttat   | cataaaaattg  | aagctattta  | tttatcttct  |
| 10921 | ctgtacagat  | taaatgacaa  | aaaaactcac   | gtatctggcg   | tctcatgttt  | aattttttgc  |
| 10981 | actatgtgca  | ccttatgtct  | ttatcaaact   | tctacctaca   | taagctgaaa  | cgcgcttata  |
| 11041 | aagcgtttta  | aacataaaaa  | aacgccaaact  | taaaaaatgg   | atagtgaata  | actagctacc  |
| 11101 | ctagggtttc  | ttttgccttt  | ttttctgttt   | agtaaatttc   | ttaaacattt  | atagctaagg  |
| 11161 | ttagttgcat  | ttaaaagcag  | ctgagtcgcg   | gttattaagc   | gtttagaata  | aaaaaacgcc  |
| 11221 | atacttgaaa  | gtataatgta  | agtaattagc   | caactacggg   | gcttcttttg  | cctttttttt  |
| 11281 | at ttggtaaa | tttcttaaac  | at ttatggct  | aaacgacaat   | cg tcatcccg | ctacttgtta  |
| 11341 | gcgggatcta  | ttgccgagat  | accgcgaatg   | aatcgcggtg   | tgacgggttcg | cggtggcatg  |
| 11401 | acgataaagt  | ttatacctcg  | tcatcccgct   | gcttggttagc  | gggatctctt  | gttagcggct  |
| 11461 | gagataccgc  | gaatgaatcg  | cggtatgacg   | gttcgtggca   | gcatgaagat  | aatcccgcta  |
| 11521 | cttggttagcg | gctgagatac  | tgcgggcggtg  | tgacgtagat   | tgctgtcatt  | ccgctactag  |
| 11581 | ttagcgccgc  | agcggtatgg  | tgtaggaaaa   | ttagctatat   | agctaacttg  | taccacgcgt  |
| 11641 | taaagctttt  | aaacaggtct  | tggtttactt   | actccattat   | tttctttatt  | atcagatatc  |
| 11701 | at tttaataa | atatggagga  | gcaaattgtc   | agcaattgcc   | attattgatt  | ttggttcaca  |
| 11761 | gtttacacag  | cttatcgcaa  | gacaagtaag   | aggaatgggc   | gtttattgtg  | agatatttcc  |
| 11821 | aagcaacatc  | agttttgaaa  | caatatcaaa   | attcaatggg   | tttattctct  | ctggaggacc  |
| 11881 | acaatctgta  | aatgatgatt  | gttctgaaac   | aagtagagta   | gtacatgaaa  | ttataaaaact |
| 11941 | taatgaggca  | acaagcggtc  | ctatacttgg   | aatatgctat   | ggacagcaac  | tcatttgtca  |
| 12001 | ttat ttttgg | gcaaaagtaa  | aagagagttt   | caaacaggag   | tttggtagaa  | ctaaaatcaa  |
| 12061 | gatactaaaa  | gaatccccca  | ttgtaaagga   | tacctgggat   | gttaattctg  | aagtggatgt  |
| 12121 | attaatgaac  | catgcggaca  | gtgttgatac   | tataccacag   | ggatttactg  | ttatcgcac   |
| 12181 | aggtgtgata  | aatcaaacaa  | ttgcaatgat   | tg ttaacgaa  | cagcgaaaaga | tttactgtac  |
| 12241 | tcaattccat  | cctgaagtga  | ggcccacaac   | aaatggcagt   | aaattgctct  | ctaacttctt  |
| 12301 | ggatattgca  | aattgcgaaa  | gagactggac   | aatgaagtcg   | tttattgagg  | agcaaaagga  |
| 12361 | aaaaatcaaa  | aatgtagtag  | gagagaaaaa   | agtaatcgct   | gcagtaagtg  | gtgggggttg  |
| 12421 | ttcaagtgtt  | gcagcggtc   | tcacatataa   | agctatagga   | aaacaattaa  | actgtatttt  |
| 12481 | tatcgatact  | gggttggttac | gcaagaacca   | gaccattgct   | atgttgaaaag | agattccgat  |
| 12541 | aaactacgtt  | gataaatcaa  | at ttat tttt | gagtagattg   | aagggaataa  | ctgatccaga  |
| 12601 | agaaaaacga  | aaaattatcg  | gtaacacttt   | tattgaagtg   | tttgaagaag  | aagcaaaaaa  |
| 12661 | aataggtgat  | gtggattttt  | tgatgcaagg   | taccatctac   | tctgatgtag  | ttgagtcagg  |
| 12721 | gcatgcctca  | gacaacacta  | gtacaattaa   | gtctcaccat   | aatgttgggt  | ggttgccaga  |
| 12781 | aaagatgaat  | ctgaagttag  | tggagccttt   | acgttacctc   | tttaaagatg  | aggtaaggct  |
| 12841 | acttgaaaag  | gaaattgggc  | tttcagacga   | gataaatatt   | caacatccat  | ttcctggacc  |
| 12901 | cggacttgca  | gtgaggatta  | taagtgaagt   | cgataaagaa   | aaggtgcaaa  | tattgcaaga  |
| 12961 | agtagatgaa  | atatatatata | atacgatgaa   | aaattacgat   | ctatatgata  | agatatggca  |
| 13021 | agctttttgct | gtattattac  | caataaaaaa   | tgtaggcgtt   | atgggagatg  | gtcgtacgta  |
| 13081 | tggatatgtt  | tgtgctttta  | gggctgtaac   | atcatctgat   | ggtatgacag  | ctgatgcatt  |
| 13141 | tccatttgaa  | aataaggatc  | aacacttgct   | agtat ttttgg | gatttttttac | agaatgttgg  |
| 13201 | cagtataaatt | gttaataatg  | ttcccggagt   | aaatagagtt   | gtttatgata  | tcacttctaa  |
| 13261 | accacccgca  | actattgagt  | gggagtaaat   | caaaaagatc   | ccgctgcttg  | ttagctggat  |
| 13321 | ctagagatac  | cgcgaatgaa  | tcgcgggtatg  | acggttaatt   | ttcttttatt  | tgcttataat  |
| 13381 | ttccacaagc  | agtgcaaaaca | taaatgaaga   | atacaaaatat  | cctttttggta | attctatatg  |
| 13441 | aaatccatga  | agtatgaggt  | acacaccgac   | aagtaaaaata  | aataaaaatgg | cgattatttt  |
| 13501 | taaccctggg  | ttagattttga | ttaaactgggc  | ggtataaactt  | gataaaaaaca | gcattgctag  |
| 13561 | catggaaaaat | gtaaatgctg  | tagcaattat   | taccatgtta   | taagtttagtg | ctatagcagt  |
| 13621 | taatatcgaa  | tcaaccgaaa  | aaactaaatc   | tattaatatata | at ttgtagca | caactaaaaa  |

|       |                       |                       |                     |                       |                     |                       |
|-------|-----------------------|-----------------------|---------------------|-----------------------|---------------------|-----------------------|
| 13681 | aaat t t t t g a t    | t t a a c g t t t g   | c t t t c t t t t t | a t t t t t c t t a   | c a t a c a a a g a | t g t c a t c c c g   |
| 13741 | t a a c t c c a t a   | g a g c t c t t a a   | c a a t a a g g a a | t a a t c c c c c t   | g c g a t c a t a a | g t a a a t c c c t   |
| 13801 | t g c t g a t g c a   | g t g t g a a a t a   | t a g g t t t t t g | c a t t g a c a a t   | a t a g a t g a t g | t a a a a a a t a g   |
| 13861 | t a t t a c a a a a   | c g c a t t a a t a   | g t g c t a a t c c | a a g g c c c a t a   | a g g c g c a c t c | t t t c t c t c a g   |
| 13921 | c g c a t t t g g t   | a c c t t a t c t a   | t t g c t a g a g a | a a t a a a g a t t   | a a a t t g t c t a | c a c t a a g t a t   |
| 13981 | a g t t t c a a g t   | a g t g t a a g t g   | t c a g t a a a g t | c c a a g c a t c a   | g t t a g c a t t t | t t g t t t c a a a   |
| 14041 | t t c g g t t c t t   | c t t a c t c t a c   | a a t a g a t g t g | t a a a a a t t a a   | g t g a c t t c a c | t c a g a a g t t t   |
| 14101 | t a t a g c a g t t   | c t c c a g a a a a   | a c a g g a t a t a | t a a a g t t c a g   | c a g c t t c t t c | t a t t t t c g t t   |
| 14161 | t t t g a g c a a a   | a t c a a t a a t a   | a g a g a g t t t c | t t a t t t t c a t   | g c a c g c a a a t | a a g a t a a a g c   |
| 14221 | c t t a t t t t t c a | t t t t t g a c t t   | t a t t t g a a a a | t a a t a t a t a c   | t a t a a a a a t a | g t g t g c t a g g   |
| 14281 | t t g a a t g a a t   | g t a t a t t a a a   | g g a t c a c c a t | c a g g c a a a g t   | a t t c g c t g g t | t a t c a g g c a t   |
| 14341 | t t a t a c c a a g   | c c c c t t g c c a   | c c a a a a t t t g | a a t g g g a c a a   | t g a t t t a g t t | a a t a g t c t t t   |
| 14401 | a a a c c c t t a c   | t t t a c t a t a a   | g g a a a g t g g t | t g a a a a c t t a   | g g t g t c g t a t | t t a c a a c a g c   |
| 14461 | c c a a a g a g c a   | a t c g t a a a g c   | t t g a a g a t t t | a g g c a t c g t t   | t c a c a a a c t t | c t c a a g g a a a   |
| 14521 | g a g a g a t c g g   | g t t t a t t g t g   | c a a c t g a t a t | t t t g a a t a t t   | c t a g a a g a a c | c a a c t a a g a t   |
| 14581 | t a c a g a g a a c   | t t c g a t a g c a   | c a t t g t a g c t | a t t g t g a t g a   | a t a a a t t c a g | c a a a c a g c a a   |
| 14641 | g c t t a a a g a g   | t c t g a t c c a a   | t g g a c a t g c t | g a a c a a a a a g   | t a a g g a g c t c | c t t t t g g a g g   |
| 14701 | a t t a t a t t a a   | c t t a t t a a t t   | a a t t g c t t g a | c t t t t a g c a g   | g a t t t a t t a t | a t t a t t t a t t   |
| 14761 | a a t g a g c a a t   | g c a a t c a a a c   | c a a g g a g g a t | a g c a t g a t a a   | a t a a t t t g g a | t t c a a t a a t t   |
| 14821 | c t t g g a a t a a   | a a g a t g g t g a   | a a a g g c g a t t | g a a g a t t t a a   | g g g t t g t t c t | t a a a a a a a g a   |
| 14881 | a a a g a a g a a g   | t t a t t a c t a c   | a c a g a c a t t t | a a t t a c g c t t   | t a c g a t g c c c | a a a a a c t a c a   |
| 14941 | a a g g a a g c g a   | t a g t a c a c g a   | a a t t c t g c t t | c a t t t t t a t a c | a a a a t c c t g g | c g a g c a a t c a   |
| 15001 | c t a g a a c a a g   | t g a t a c a a t g   | c t t a g a t a g a | g c a a t a c a a t   | c t g g g a t a t a | t g c a a a a a a c   |
| 15061 | a a c c c a a t a a   | g a a a t c t a g a   | t g a a g a a t t t | c g t a c t c a t a   | t a a a c t t t a a | a g a t g a a g a g   |
| 15121 | g g a a a t a c a t   | t a c t a c a t c a   | t g c a g t t a t a | g g t a a t a a a a   | c t g a a g a a a t | a a t c a c c c t t   |
| 15181 | c t t g t t a c a t   | a t a g t g c a a a   | t c c t t t g a t a | c a a a a c g c g g   | a t a a t a a a a t | t c c t t t a g a t   |
| 15241 | t t a g c t c a a g   | g a g a a c a a a a   | a g a a g t g c t t | a t t a a a a g t a   | t g a a a a a a c a | a g c t a a t a c g   |
| 15301 | a a a a a a g a a a   | g c g c t a t g g t   | a g g c a g t t t g | g t g c c t g g c g   | t a a t a a t t g g | t g g t t t t c t t   |
| 15361 | g g t g t t g t a c   | t t g g a g c t g g   | t g t g t g t g t t | g c a g t a a g t c   | t t t c t g g t g g | t a t g a t a c t a   |
| 15421 | g g t g t a a t g a   | t a g c a t c t t c   | t c t t g t t g c t | a g t a t a g c t a   | t t g g a c t g g c | c a t g t a t t t t   |
| 15481 | t t g a g t c a a g   | a c t a t g a a c a   | g g c t a a a g c g | a t a g a a a a a a   | c t a t t a g c a c | t g t t a g c t c t   |
| 15541 | g a a a t a t c t g   | t t g a t g a t a c   | a a c t g c c g c t | a a t a a a a a t a   | a t a a a g a a g g | g c c a c a a c t t   |
| 15601 | a c a t a t a g c t   | g a c c c a a g c a   | a c a c g t c a t a | c c g c g a t t c a   | t t c g c g g t a t | a g a t t c c g c t   |
| 15661 | a a c t a g t a g c   | g g a a t g a c g a   | a t g t g t c g t t | t t t c a a a a t t g | t c g t a a g t c a | c t t t a g c t a t   |
| 15721 | a a t a c a c a c a   | a g g a g g g t g t   | c a t c c c a g c g | c c c c t a t g a t   | g t c a t c c c a g | t g c t t g a c a c   |
| 15781 | t g g g a t c c a g   | a a a a g t t t g c   | t t g t a a a c t a | g c a t g g a a a g   | t a g c t g a t c t | t a c a c t a a a t   |
| 15841 | g a a t g t t t t t t | g a t g a g g t t g   | c a t a g a a g c t | g g a t t c c a g c   | g t c a c g c g c t | g g a a t g a c a a   |
| 15901 | c t g c g t t t t t t | t g t t t t t t t t g | t c a t c a a a t a | c t c c t a c t c t   | t t a t g t c a t c | c a a g t g t c c t   |
| 15961 | g a c t a c t t g g   | a t c c a a g a a a   | t t t a a t t g t t | t t a a a t t t t t t | c c c t c t a t a c | a c c t a t t t t a a |
| 16021 | a a t t t a t g t t   | a t c c a c a t g t   | g c a a t a t a a t | c t a t a a t a a c   | g t t t a t c a a t | a c a a t a t a t t   |
| 16081 | a a a a a a t a t t   | a t g a g c t t c g   | t a a a a g a a a a | a a a c a c c c c t   | g t g a t g g a g c | a g t a t t t g a a   |
| 16141 | c c t g a a a g c t   | c a a t a c a a a g   | a t c a t c t g c t | a t t t t a t a g g   | c t a g g a g a t t | t t t a t g a a t t   |
| 16201 | g t t t t t c g a t   | g a t g c t a t t a   | a a g c t g c g a a | a t t g c t g a a t   | a t a g t g c t c a | c t a a g a g a g g   |
| 16261 | t a a t t c g t g t   | g g g c a a g a a a   | t a c c a a t g t g | t g g a g t g c c a   | g c a c a c a g t a | g t g a a t c t t a   |
| 16321 | c c t a c a c a a g   | c t a a t a g a t t   | t a g g a t t c a a | a g t a g c a a t c   | t g t g a c c a a t | t a g a a a c t g c   |
| 16381 | t g a t g a a g c a   | a a a a a g a g g g   | g c t a t a a a t c | c a t a g t a a a a   | c g t g a t g t a g | t g c g a g t t g t   |
| 16441 | a a c t c c a g g t   | a c a a t t a t a g   | a a g a t t c a c t | a c t g g a g g a t   | a a a a g c a a t a | a t t a t c t c g c   |
| 16501 | g t c c a t a g t t   | g a a c a a a a t g   | a c g a a t a t g c | t a t t a g t t g g   | c t t g a a t t a t | c g a c g g g a a a   |
| 16561 | a t t t t t t c a c   | a c t t t a a c g a   | g t t t g a a a g c | t c t a g a t a g t   | g a t t t a t t g c | g t a t a t c a c c   |
| 16621 | a a g a g a a t t a   | t t a a t t t c t g   | a a a a a t t c a c | t g a g g a t g a a   | a a a a t t a g a t | c g a t t t t a a a   |
| 16681 | a a a t t a t a a a   | a t a t c a a t t a   | c g c a a c a c g c | a c a g a g t t t t   | t t t g a g t a t a | g t a a a t c t c a   |
| 16741 | c a g a a c g t t a   | t g c g a g t t t t   | a t a a a a t c a g | g g a a c t t g g g   | a g t a t a g g a a | a t t t c a g c a a   |
| 16801 | a g t a g a a a t c   | a t g g c g t g t g   | g t g c a c t g c t | t g a a t a t g t c   | a g a g t a a c g c | a a a g g g g c t c   |
| 16861 | c a t t c c a a g g   | c t t g a a t t c c   | c a a a a c c t a   | t a a g c a a c a a   | a a t t t c a t g c | t t a t t g a t g c   |
| 16921 | t t c a g c a a g g   | a g a a a t c t t g   | a g t t g t t t t c | a a c t c a a t t t   | g g t g a a a a g a | a a g g t t c a c t   |
| 16981 | a a t t t c a g t t   | a t t g a t c a t a   | c a g t t a c a g c | t t c t g g t g g a   | c g c c t g c t c a | a a c a a a t g c t   |
| 17041 | c g c t t c a c c c   | c t t g c t t g c t   | c c a a g g c a a t | c a a t t t g a g g   | c t c a g c a c c g | c t c a a t t t t t   |
| 17101 | t g t a a a t a a t   | c a t g a g c c a c   | g c a g a a a a t   | a c g a g a g a t a   | t t a t c t a a c a | t t c c a g a t a t   |
| 17161 | t g a g a g g t c t   | t t a t c g c g c t   | t a a t a c t a g g | g c g t g g t t c a   | c c a a a g g a t a | t g a a c c t a t t   |
| 17221 | g a a a a t a g g c   | c t a g g a a a g a   | c t t t a g a g t t | g t c t g a g t t t   | c t g t c t a c c t | t g c a t a a t t a   |

|       |             |             |             |             |             |             |
|-------|-------------|-------------|-------------|-------------|-------------|-------------|
| 17281 | ttgtttaagt  | gaaaaatcag  | aaattaactc  | tcagatgtca  | ttccagtgtc  | tgaccggaga  |
| 17341 | aaaggaacca  | gtgtctacta  | ctcaggtgat  | aagtagtgac  | gagagtgaac  | tcagcacaat  |
| 17401 | acataagagc  | cttggtaatc  | ataaagacct  | atgtgaactg  | ctaaatagt   | ctatacttga  |
| 17461 | taataatctc  | agttccgtga  | aagagggagg  | gtttatctac  | ccaaaataca  | actcagaatt  |
| 17521 | atctgagtta  | tcttatatat  | tgaacaacag  | taacaagttg  | gtaactaagc  | tccgtgaatc  |
| 17581 | ttatcgcgac  | ctaactggca  | ttgccgcact  | caaaatattg  | cacaacaata  | tactcggtta  |
| 17641 | ttacgttgaa  | gtatcagcaa  | atcacaaaat  | aacttcggat  | atattttattc | ataggcaaag  |
| 17701 | cttagcaaat  | agcatgcgct  | acactactaa  | tgaattgaaa  | gaactagaaa  | ataaaattct  |
| 17761 | tacggcacgt  | gatgctgcaa  | tcggcttaga  | aatgaaaatt  | tttagtgaac  | tgtgtagtga  |
| 17821 | agttgctaaa  | gagtcgaaa   | aaattgctct  | tgctgcaaat  | gctttggcaa  | aacttgatat  |
| 17881 | tagaaccgcg  | tttgagagc   | ttgcagtgca  | aaataattac  | gtaaaaccca  | ttattgatga  |
| 17941 | cagcaaagag  | ttcaatatct  | gtagcgggaag | acatccagt   | gttgaagtta  | acgataaatt  |
| 18001 | cattgcaaat  | agcatcaatt  | tagctgggtat | acatctaatt  | actgggtccta | atatggctgg  |
| 18061 | aaaaagcact  | ttcttgaggc  | aaaacgctct  | cattgcaatt  | ttagctcaca  | tggggtcatt  |
| 18121 | tgtgccagca  | gagagtgtac  | atattggagt  | gattgacaag  | atattcagca  | gggttggcgc  |
| 18181 | aacggataat  | ataacagctg  | gttattctac  | cttcatggta  | gagatgatcg  | aaacagcaac  |
| 18241 | gatagtaaat  | caggcaacgg  | accgttcctt  | ggtgatactt  | gatgaaattg  | gtaggggcac  |
| 18301 | aggggtgtat  | gatggattat  | ctattgcaca  | ggcggtgatt  | gaacatatct  | acaatgtaaa  |
| 18361 | taagtgccgc  | gccatttttg  | caactcatta  | tcatgaatta  | actaaagtaa  | gcaaatactt  |
| 18421 | gaagaacgtg  | aaatgttttt  | gtgtaaaaaat | aagagagtgg  | aacggagagg  | ttatctttct  |
| 18481 | acatgaagta  | attgaaggca  | ttgcagatga  | gtcatatgga  | atacatgtag  | caaaacttgc  |
| 18541 | tggttttcct  | gattctgttt  | taaatagagc  | aagtgaggta  | tttgaggagc  | tgaaggcttg  |
| 18601 | aatcattatt  | ataagtgaag  | aattacctat  | acaatcgtgg  | tagtagctat  | agaaacgaaa  |
| 18661 | aacttacttg  | acacccttcg  | ccagcgccct  | tatcatgata  | gtgaagctat  | tgtatttgc   |
| 18721 | ttcgccaatc  | tgcagattaa  | aaggtaagga  | ttacttaatg  | tatcggcgct  | ttatgttcaa  |
| 18781 | ttttttgcag  | tatatagata  | ctgtatgtct  | ttacaaaact  | tcatctacat  | ctagattttt  |
| 18841 | atctaaataa  | gctgaacgcg  | cttataaagc  | gttacaagac  | atcaaaaaat  | gccaatactc  |
| 18901 | gacagagata  | gtaaaagact  | agctaactcg  | gggattcctt  | gtcttttttt  | ctgcttggtg  |
| 18961 | aatttcttaa  | acatttgcag  | cgtaagttag  | ttgcaattaa  | aagcggctga  | atctcgcttg  |
| 19021 | tcaagcgttt  | aaaacataaa  | aaacgccaat  | attttaaagc  | ggataataac  | cccagggtct  |
| 19081 | cttttgcctt  | ttttttcatt  | tggtaaattt  | cttaatgttt  | gtggctaaca  | tgaacaaaca  |
| 19141 | tttgagagta  | acttccgcta  | gtaggggtgc  | atcccagtg   | ctgggcactg  | ggatgacaaa  |
| 19201 | aaaaggaggc  | tactcggatg  | acagctagcc  | tgacaaccgt  | catcccgtcg  | cttggttagcg |
| 19261 | ggatctcttg  | ttagcgccgc  | ggcgggtatga | cgtagaattt  | tacactcacc  | aattcagtgt  |
| 19321 | ccaatctgga  | ttccagactg  | gaatgacacc  | cttttggtg   | gaaaccagt   | tcaggacact  |
| 19381 | gggatgacaa  | gaaagaggct  | acttggtatga | tacctatagc  | cctgtcattc  | cagcgcgatga |
| 19441 | cgctggaatc  | tagttcttat  | tatatatcca  | gagatttact  | atattagtaa  | tatcaaacta  |
| 19501 | gatcaattct  | tgctacttca  | atttttcttt  | cagtttaattc | ctgcctggca  | cgttaagtct  |
| 19561 | agccttttat  | aaatgaacca  | gaattataat  | ttatctttta  | aaaatctcaa  | atgtaataaa  |
| 19621 | tttatgtttt  | aaaggatttg  | atatatcaaa  | ttttattgta  | tttactttct  | catcaaaaac  |
| 19681 | tatagtattc  | tcatctatgt  | gatattctgtc | tatttgatat  | gctagtga    | atgctcaag   |
| 19741 | cttatcagaa  | gttgaggag   | atttatatac  | cactacattt  | aaagtttcta  | agtctaagtt  |
| 19801 | cactctaaca  | gtcacaaac   | cttgttcaaa  | cgaactttca  | aacaaacctt  | gaatagattc  |
| 19861 | accatgcata  | catggcgggt  | ccattcttac  | agcagatata  | catcgattat  | atattgcac   |
| 19921 | ccctgaaccg  | ttgtgcatgc  | acatcgtaaa  | atctttactt  | ccttgaaaaa  | ggtctataaa  |
| 19981 | atctaccata  | acacttcacc  | actacataac  | aaacacttta  | taatattata  | agtaactagc  |
| 20041 | aagctccatt  | actaatttcg  | tagtgactct  | aattgcaaaa  | tttaataata  | gtagtaaagt  |
| 20101 | agaaccactg  | aataaaaaac  | atatgttaat  | taatacaacg  | tcggagctgg  | aggacatatg  |
| 20161 | tgaggggttg  | atagcaaaaa  | agccaaaatt  | tatagcagtt  | gacacggagt  | tcattagaaa  |
| 20221 | taattttaatc | tactacccaa  | aattatcggt  | aattcaaatt  | tcttacggag  | agaagagttt  |
| 20281 | tattgtagac  | gcatttagtc  | cagaaattga  | tttatcattc  | attaagaaaa  | taatgctaaa  |
| 20341 | tcaggggata  | accaaagtgt  | ttcatagctg  | ccggcaggat  | atagaatcct  | tactcactgt  |
| 20401 | atttaaatgt  | attcccactc  | ccatttttga  | tacccaagtt  | gctgctatgt  | tttgtcatta  |
| 20461 | ttatcatgac  | tttattgggt  | actcaaaagt  | agtggagcaa  | tatcaaggaa  | tagcactgga  |
| 20521 | taaaattaaa  | gctaaaaaatt | cagattgggt  | aaggcgctccg | ttgtccgaag  | atcagttaga  |
| 20581 | ttatgcagta  | aacgacgtgg  | tacacctata  | tgacctatac  | caaataattgt | gcaataaact  |
| 20641 | tgaagaaaat  | aataggatgg  | gttggtttca  | agaagagatg  | gaatcaatag  | ttgatataaa  |
| 20701 | taagtattta  | catagcccaa  | aagatgcatg  | gaagaggatt  | aaattttaatt | atgaagtaaa  |
| 20761 | tccaagattg  | atactaactg  | ttaaagcagt  | tagtgagtgg  | caagaaacct  | tagcacagcg  |
| 20821 | ctataaatatg | aaccgtaata  | aaataatcaa  | taatgctgta  | atagctgatt  | ttattgaaaa  |

|       |             |             |             |             |              |             |
|-------|-------------|-------------|-------------|-------------|--------------|-------------|
| 20881 | aaatgtagag  | catgttgatg  | agatttttaga | tgatctcaag  | aggaatacaa   | aaaatataaa  |
| 20941 | agatgcggat  | ttactagagt  | ttgtgaatat  | ttttaatgaa  | aatgagagaa   | attggatgca  |
| 21001 | gcaaaacaac  | accttatcga  | gtaattatga  | taaatctgta  | cttgatatac   | tctcaattat  |
| 21061 | tttagatagt  | aaatgtaaag  | aaagtaacat  | atcaaggaaa  | ttagtttctt   | caaaagatga  |
| 21121 | gttaaccggg  | tcaatatcta  | gacagacaga  | taaattattc  | aagggatgga   | gatatgattt  |
| 21181 | ttttggcagg  | tcagttgaat  | catttttgaa  | cacaagctca  | aaatttgaga   | tttcagcagt  |
| 21241 | gaaatccgca  | aataatataa  | ccaaaattca  | gagtaattta  | gtggagaata   | actgttgcta  |
| 21301 | aagtaactta  | gatttatcga  | caatcgtcac  | cccgtacgt   | gttagtggct   | aagagatacc  |
| 21361 | gcggcgggat  | gacgggttaag | taggggtgtca | tcccagtgcc  | ttgactactt   | cgatccagga  |
| 21421 | aaattgattg  | taaacgagca  | aacatttttcg | ataaaattac  | caaaaagcta   | gatcccagac  |
| 21481 | tgggatgaca  | ccacctacaa  | attgcaatgt  | tcgtatagtt  | atgtgcttga   | cactgggatc  |
| 21541 | tagaaaatct  | agttaatata  | tatagagaaa  | ccttagctat  | agtttcaaaa   | gaagtcgaat  |
| 21601 | gtatttttgtt | atatgattat  | aagtctaaca  | ggcgggaattg | gggtaggaaa   | gagctttgta  |
| 21661 | gctaattgct  | ttcaagagtt  | tggtgctgtt  | gtatttgatg  | ctgattctgt   | tgtacaccaa  |
| 21721 | ctttataaag  | tggataaaaag | cataataagt  | tatgcagaga  | aaaattttcc   | tggagtggta  |
| 21781 | gtaaattggtg | aaatagatag  | aacagtactg  | tctaaatatt  | tcttagccta   | cgatgaaaat  |
| 21841 | tggaaacaat  | ttcaatcttt  | ggttcactct  | gctgtgctgc  | gtgaattaga   | atTTTTtatt  |
| 21901 | gccaaaggaaa | aaaagatcga  | tagaaaactt  | ttagtttttag | atgtgccact   | tctattagaa  |
| 21961 | acaaaattttt | atTTtatattg | cgaccttatt  | gtttttgttc  | atgcagatag   | cgttgtgcaa  |
| 22021 | gctcaaagac  | ttaacgaacg  | caacatagat  | aaagaaaagc  | ttaatctaata  | ctccgatgtt  |
| 22081 | cagttatcta  | ttgaggagaa  | aaggaagatg  | agtgacttta  | ttatcgatac   | cagtgtgaagc |
| 22141 | aaagagtatg  | ttttttctca  | agtaaaagat  | atagtggatt  | cattaaacct   | aaacacgtag  |
| 22201 | ctctacgtca  | taccgccgcg  | gtatctctag  | atcccgtctaa | caagcagcgg   | gatgacggtt  |
| 22261 | gtcaggatcc  | cagcagcctc  | cctccccctgt | catccaagta  | gccccctatg   | gtgtcatccc  |
| 22321 | agtgcccaga  | cactgggatc  | caggaaaatt  | gattgtgcac  | tatagcaaca   | tttttgatca  |
| 22381 | aaaactggat  | tccagtgggc  | tttgttgcat  | cgctacttat  | gaaaggctaa   | ctatagttag  |
| 22441 | gattataagc  | aaactattga  | aaatcttggt  | tttttgcaat  | caatctgatc   | aaatttaaga  |
| 22501 | atagtaatttt | gttattttata | ttataaaatt  | taattctatt  | gaaaatagct   | aaagcattga  |
| 22561 | aattcttgaa  | tttttagccgg | attggtaaat  | ggtagtgaaa  | tttctttttac  | tcaaatttag  |
| 22621 | gtattcattg  | accgttcttg  | ttataaatac  | cagaataata  | agctactgat   | attccctatc  |
| 22681 | ttttttatct  | ttaatccatc  | atagctagcg  | atgcaacaaa  | gccattccag   | tgtcaagcac  |
| 22741 | tggaatgaca  | cccttccgat  | gggaactgct  | ctcaaactac  | aacagcatga   | gtagctatag  |
| 22801 | aagcttttaat | gatacaagaa  | aaaataaaca  | gctatcattt  | tttttagtaat  | taagtaaaat  |
| 22861 | agagtgaag   | attgcgagga  | agttttgaaa  | aataagataa  | aaaagatagt   | aatttcagga  |
| 22921 | aaggaagtgt  | ggccaatcat  | cgagggcggc  | aaaggcattg  | cagttagtga   | tggaaagatca |
| 22981 | agcggagcat  | ttgctgcagc  | agatgctgtg  | ggtacatttt  | ctgggtgcaa   | tgctaagctt  |
| 23041 | attgatgata  | atggcaagtt  | agtgccacta  | atTTtataaag | gcaaaacaag   | aatgaaaag   |
| 23101 | catagtgaat  | tgattgagta  | tagtattgaa  | gctggaatta  | gtcaggcaag   | aatagcaaat  |
| 23161 | gaaatatcaa  | aagggtcatgg | aagaatacac  | atgaatgtac  | tttgggagat   | gggagcagca  |
| 23221 | gaacgcgtgc  | ttcatggcat  | attagaagga  | gcgaaagggt  | tgattcatgg   | tattacctgc  |
| 23281 | ggtgctggta  | tgctttatag  | gcttgagaaa  | attgcagcta  | aatatcaggt   | ttattattac  |
| 23341 | cctattatct  | catcgggtgcg | tgctttttaa  | gcattatgga  | agcgtgctta   | ccaaagaata  |
| 23401 | tcttccctatt | tgcttggtgg  | agtagtgtat  | gaagatccat  | ggcttgctgg   | agggcacaaat |
| 23461 | ggactcagta  | acagtgaaga  | tccagagcta  | ccacaggctc  | catttgaaaag  | agttgcagag  |
| 23521 | cttagatctt  | tcatgaacga  | gatcgggtctt | tcagaaaacac | caattgttat   | ggcaggagga  |
| 23581 | gtgtggcatt  | tgaaagattg  | ggaacattgg  | tttaacaatc  | tgcaaattgg   | accaatagct  |
| 23641 | tttcagtttg  | gcactcgtcc  | acttttgacg  | aaagaaaagcc | caattttctgc  | agagtggaaa  |
| 23701 | aagaagctac  | tcacttttaga | agaaggtgat  | gtatttttta  | ataaatttcag  | tccaacaggg  |
| 23761 | ttttactcat  | ctgcagtaaa  | aaataacttc  | atacgtgagt  | tgcaaggaaacg | gaattcacgt  |
| 23821 | caaataaagt  | tttcagaaaa  | tgctagcgaa  | gaatttaata  | atgaattttgc  | aatgggtagc  |
| 23881 | agaggtagaa  | agatctacct  | tactgcaaaa  | gacaaagaac  | tggaataac    | atggactaaa  |
| 23941 | gcagggtaca  | cagaagcaat  | gaaaaccca   | gattcaactg  | ttattttttgt  | gacgccagat  |
| 24001 | aaattttaaac | aaataagaga  | agatcaaate  | aattgtatgg  | gatgttttag   | ccattgtttg  |
| 24061 | tttagcaatt  | ggaaagatca  | tggtgaccat  | tcaacaggac  | gaaagccaga   | tccgcgtagt  |
| 24121 | ttttgcatac  | aaaaaacact  | gcaaaacgtt  | atacacgatg  | gtgatattga   | gaacgaactc  |
| 24181 | atgtttttccg | ggcacaaatgt | gtacaaaattt | aagcaagatc  | catttttatga  | gaatggctac  |
| 24241 | gtaccggcag  | taaaagaact  | ggtggaaagg  | atattgactg  | ggtattgagt   | cagtgcactt  |
| 24301 | accagaaaa   | agtggagaga  | aagtgtggaa  | tgTTTTtttac | aaaaagaatg   | atgcatcaaa  |
| 24361 | ttgttctgga  | atgcaatagt  | taatagtgc   | gttgTTTTgtt | ataaaaaatt   | tctatgtatt  |
| 24421 | caaatattgc  | agttctagtt  | tgTTgagcag  | agtgtTgtga  | agtatcaata   | agtattttctc |

|       |             |             |             |             |             |             |
|-------|-------------|-------------|-------------|-------------|-------------|-------------|
| 24481 | ttttcaatga  | gctaaagaag  | ctttccacaa  | cagaattgtc  | gtaacaacaa  | cctttatgac  |
| 24541 | tcatctatgt  | tttttatgga  | taagagatat  | tgataacctt  | gcaaagtata  | ttgtgaacct  |
| 24601 | tgatcactat  | gtaatagtag  | atTTTTggca  | ggTTTtacgt  | tgTTaacgtc  | cattaataaa  |
| 24661 | gagtccataa  | ccaattgttt  | atTTattgca  | ctactcatta  | actaccatac  | gtgagaatta  |
| 24721 | ttgctgccaa  | atatagccat  | ccctccttgg  | TTTTgatgta  | agtaatccca  | tactttatTT  |
| 24781 | ggTTgatcaa  | caataaagtt  | ttgatctagt  | atattgggag  | ctacagctct  | attatctgtt  |
| 24841 | tgTTgtTTTT  | taattTTTaaa | ctttcttctc  | agtatagccc  | tgatgtcatt  | tttctgcata  |
| 24901 | atactTTtgca | ccgTTTTcaa  | attgcaactt  | ttacccaaag  | cTTTcaattc  | agcatgaatt  |
| 24961 | ttaggagctc  | catatctaca  | TTtagaagct  | tgatatattt  | TTTgaatatc  | tgctaataac  |
| 25021 | tctttatTTtg | ctgattctct  | actgcttatt  | TTtcttTgtg  | tccacttata  | gtagccacta  |
| 25081 | gcagaaaatc  | ctacataaatt | cctgtacttt  | atagcagtta  | ctatataaaa  | aaatatTTTta |
| 25141 | ctctTTTTtga | ctggccaggg  | ctTTTTTTTT  | aatgtctctt  | tccctTgtta  | ctctTgcttt  |
| 25201 | gtaaatacaaa | cctctctTTtg | tcataaggTg  | ctacatctgg  | aaatgcattt  | gccgctgact  |
| 25261 | TTTTTtcgtt  | atatttcttc  | atccattttc  | ctaatacact  | atcccttatt  | cctagatctc  |
| 25321 | ttgctacttt  | tgcaactggT  | tgacctacct  | TTctTTgttc  | attTgtcagc  | TTaacagctt  |
| 25381 | ccaatttgaa  | TTctgccgta  | tattctctta  | ccatttctaa  | tcttccaaaa  | TTTTattTTta |
| 25441 | cccaaaaaaa  | ctctTTTctt  | tctctccact  | TTTTctgggt  | aaggTcagtt  | tactggcctc  |
| 25501 | tccatgagtg  | agattgaaaa  | attaagtTga  | aatctgtgaa  | cggtTacctt  | ggatgacaga  |
| 25561 | aaagagtgtt  | ggaaggaggc  | aatattaaaa  | acttaatttc  | agtccagcca  | agaacacata  |
| 25621 | accagagttg  | TTattTTcta  | TTTTaggctc  | TTTTgtacta  | aactTTTaaa  | tatcgaaata  |
| 25681 | gtatgaagta  | cctaaaaaaa  | gagaattttc  | aagacttaaa  | gcatatgatg  | TTaactcgTt  |
| 25741 | Tgtaccttcg  | cctgcaatat  | ccctaccact  | actaaaatat  | gttaagctcg  | attTgtaaga  |
| 25801 | atcagaacgg  | taagcgatac  | ctgcattcat  | ataatacgta  | TTattTgttt  | caggattacg  |
| 25861 | cttctcacca  | gatttaccac  | cattaccata  | cgaaaaaatg  | caatcaagat  | cgaacaattt  |
| 25921 | tagcttcaaa  | ccaaaattcc  | agtgtagtaa  | ttgattgcgg  | cattcataat  | TTTTagaagt  |
| 25981 | cccattctgag | caatcagtta  | aattttctct  | tgcaaattca  | ccagttaagg  | cagtagtaaa  |
| 26041 | acctatatca  | tctgacaagc  | TgtTTTTata  | ggaaaaggcca | gcagcaatta  | aattgctgta  |
| 26101 | ctgtaagtta  | TTTTTtctg   | gaacataact  | gaatccgagt  | Tgaaagttat  | agatttcagg  |
| 26161 | ggagatgtag  | TTaattgatg  | attgtTTTTa  | ccctagtTcg  | agttcattat  | aatcgctata  |
| 26221 | aatattgggc  | ttgacccaga  | acacctTgtc  | ttgatcatat  | ccagggtcac  | catcctTTTT  |
| 26281 | atgatcaccg  | cgcaaatTTg  | catagtTTgt  | ccaatgacca  | TTTactcctc  | cagcagctgc  |
| 26341 | ataaattTTTT | gaagtgtTaa  | TTaacatgct  | ctgactaact  | aaactTcttt  | taccatattc  |
| 26401 | aattgatcca  | agttcctggT  | TTTTtatgat  | aaaataccat  | tcttccatgt  | ctaactTTTT  |
| 26461 | tatgtctaac  | gctTTTTaggt | ttgcaatacc  | agaaacccct  | gccttaacat  | taacccccat  |
| 26521 | ttgagtattt  | ggataaaactt | gctgtaaata  | aagaaagcgc  | aagtatgaat  | aacttgaagt  |
| 26581 | TTtatcctta  | ggcttagcat  | Tgaaagaatc  | tctgttgaag  | gcgtagccga  | atctcaaatc  |
| 26641 | tattTTTTccg | tctagtTctg  | cataaaaatat | TTccttatcc  | aaaattgttt  | tagagctagc  |
| 26701 | actattctgc  | aaaaacaatg  | atgaaagcag  | Tgctaccagg  | tagtactTTta | acttcataaa  |
| 26761 | taacctTaaa  | tctTTataaa  | aattTtaagtt | Taaactcaat  | ataaataaaa  | aacaactTTTT |
| 26821 | cagaaggcac  | cgctggtaga  | TTTTgtctgc  | TgtTTTTtgag | ctatattccc  | ataaattatt  |
| 26881 | gatacacttg  | gtaattTTTtg | cattaataac  | TgcttattTaa | Tggcagaatg  | tatacgatta  |
| 26941 | attattTTtag | atgtactTTTt | tacatcgcat  | Ttaatcaaaa  | caaaaagcac  | TTtattctca  |
| 27001 | tcaatatacc  | ctagaaaaatc | atcactacgg  | caattTTTtat | aaaaatgttc  | tatgacaact  |
| 27061 | ttcagtgcac  | cattTgtctc  | actacagcta  | ctattTtaagc | caatcattcc  | tatagctgca  |
| 27121 | TTaattTtgat | gTTgaaaggc  | gaaattcaat  | ataacgtata  | actctagaaa  | tagtggactc  |
| 27181 | attgcccggt  | atatcgaaata | agTcatggTt  | TTtataatttc | TTaccatta   | gatatttcat  |
| 27241 | ctctaaagat  | tccTagTTta  | Tgggacaaac  | Tgatatacacg | Tattaatagc  | Tcataattta  |
| 27301 | TTTTattact  | ggcaaatTgt  | gcagtgcgga  | aaactTTTtac | TTTTgtcctg  | atatcttctc  |
| 27361 | ctTTtagcatc | agTTaaggaa  | aaatctatca  | ctTTtaggtaa | Tatatcaagt  | aaatcgTgcc  |
| 27421 | cattTTtcggt | atactctaaa  | TaattctTca  | Tgtcgtcagc  | TgtctTTTgca | ctTaaaatat  |
| 27481 | Tgattaacgg  | cttattTaaT  | aaattccctt  | cctcgTattt  | Taacaatttc  | ctTgcggctt  |
| 27541 | gattgagccc  | TaaaattTaa  | acgTTTTTTT  | Tcttattatc  | ctgacaaaaca | gataccacag  |
| 27601 | catcatcttt  | TcttctTgca  | gTtatgaaat  | catccatact  | Ttcattctat  | acagcgTatt  |
| 27661 | Tataagtata  | ataagattat  | attaagattt  | actTacttat  | Tgatatgctt  | gattaggtat  |
| 27721 | agacaaaatg  | Tcatacggga  | TggctTTTgtt | Ttagaagaat  | caagattact  | gTTtatagac  |
| 27781 | TtcaagTTtac | TgcaaaaaaT  | atTTTaaaaT  | atagtTatat  | ctTgactTTta | cctagtTaat  |
| 27841 | attccaaatt  | ataaaaaaaT  | agatagtTct  | atgacgacaa  | gtctattaca  | aggcaaaaag  |
| 27901 | ggattaataa  | ccggaataat  | aaataagaga  | Tcgatagcat  | gcggtatagc  | aaaaagctct  |
| 27961 | ctcagagcac  | ggagcagaac  | Ttgcaatcac  | ctaccagaac  | gaaataataa  | aagaaaaact  |
| 28021 | attaccaata  | gcagatgaac  | TaaatgtTga  | Tctaataatta | cactgcgacg  | TTTcaaatga  |

|       |             |             |             |             |             |             |
|-------|-------------|-------------|-------------|-------------|-------------|-------------|
| 28081 | aaaaatcgta  | gataacgctt  | tcgaaataat  | agagaaaaaa  | tgggggtactc | ttgactttttt |
| 28141 | ggtgcatgca  | atagcattct  | ccgataaaaa  | tgagttagat  | ggtaaataatg | tcaatacttc  |
| 28201 | actgaataac  | ttcctcaatg  | caatgcatat  | atcgtgctat  | tcttttctact | gcttttagcac |
| 28261 | aaagagctga  | aaaaatgatg  | tcaggtgggtg | gtagtttgct  | tacttttatct | tattatggcg  |
| 28321 | ctgaaaaagt  | tatgccaaat  | tataacgtta  | tgggtttatg  | taaagcagca  | cttgaagcaa  |
| 28381 | gtgtaaaata  | tatagcatgt  | gatctcgggc  | cacaaaatat  | cagagtaaat  | gcaatttccg  |
| 28441 | ctgggtccaat | cagaacttta  | gcattctctg  | gaataagcga  | ttttcacttc  | atatcagaat  |
| 28501 | ggaatagaaa  | taattctccg  | ctcagacgca  | atgttacaat  | agaggatggt  | ggcaaggcag  |
| 28561 | cgctatactt  | attaagcgat  | ttaagtagtg  | gcactactgg  | agaaattttg  | cacgttgatt  |
| 28621 | caggatataa  | cgttgtggga  | atgaaggtag  | ttgactaaca  | aagcactagt  | tccttcgggt  |
| 28681 | tcatacacia  | ctctatcagg  | agttttgtga  | ctgtgattgc  | agaaaacatc  | gaacataaaa  |
| 28741 | ttcctattga  | taaagtgaca  | gaaaagcctc  | taattgctcc  | actgccaaata | atgaacatta  |
| 28801 | ttcctgcagc  | aattaatgta  | gtgatatttg  | aatccagtat  | tgtctttata  | gcgtttttta  |
| 28861 | acccttcttc  | aatagcacgt  | tccactctct  | tgccagattt  | tatttctctca | cgaattcgct  |
| 28921 | caaatattaa  | aacatttgca  | tccaccgcca  | taccgacagt  | gagtgcataa  | ccggcaattc  |
| 28981 | caggtaaagt  | tagagttgct  | tcaagcagag  | tgagaattga  | taatataaga  | attacattag  |
| 29041 | aaaaaagcgc  | aacagaggcc  | aatacaccta  | atttaccgta  | agtgatgatt  | ataaataaag  |
| 29101 | ccacggctat  | aatagagatt  | gttgctgcca  | tttcccctgc  | ctttattgat  | tcttctccaa  |
| 29161 | gacttggggc  | aatgtttttt  | tcttcaatta  | ttttaagtgg  | tgctggcagt  | gctccagatt  |
| 29221 | ttaaaagtat  | tgcaagttcg  | cttgcttggt  | tttcagtaaa  | attaccgcta  | atcttctcct  |
| 29281 | ctccatttaa  | aattggctca  | cgtattgtag  | gtactgttaa  | gactgtgtta  | tccagaacaa  |
| 29341 | ttgcaaaagg  | ttttcccaca  | ttttctttag  | tgatttttgc  | gaatctttta  | ctcgctatgc  |
| 29401 | tgtcaaattt  | aaaatgcact  | gttggtttac  | ctaagtgacc  | aaatctaact  | gatgcgtaa   |
| 29461 | ccagcgaatc  | accacctatt  | tcagttttgc  | ggaatattgg  | ataagaatta  | cctaaagaat  |
| 29521 | ccttgagcat  | gacagtgggt  | tcatgggtcta | tatcctgcac  | cttggctatg  | ttagtgtttg  |
| 29581 | ccaaatgaaa  | agctagctta  | gcagttttgc  | caagcagaga  | ttttatctgc  | ttggtatctt  |
| 29641 | ctactccagg  | cacctgcact  | aatattttat  | tctgcccttg  | tttttgaacg  | ctgacttcct  |
| 29701 | ttgtgccaaag | tttgtccaaa  | cggcgctgga  | cattgtttat  | tgattctgca  | gctacttcac  |
| 29761 | tgatcaaaga  | atttttataa  | tggggtttat  | acgaaatgag  | aatcgaagaa  | tcttttctat  |
| 29821 | ttagctctaa  | atttggattt  | atcgcattaa  | tcaacacaga  | tgctttttta  | taatcatcaa  |
| 29881 | tattatttaa  | agttataatg  | ctatttttgta | cgttagattc  | aatatttttt  | gttagcaatg  |
| 29941 | tctcttttat  | ttcgtttagct | agcatgctta  | gcttttctct  | aaaatagaag  | tctaagtcta  |
| 30001 | tgtttaaaag  | caaagatgcc  | cctcctttca  | ggtcaaggcc  | taagttttatt | ctttttttcg  |
| 30061 | aaataaaaaag | cttattatca  | aagaaatttg  | gcagtgttat  | gtataaagca  | aataaacaga  |
| 30121 | tgcataatac  | tgaaaaagat  | ttgactataa  | gtctgttata  | cataagttgt  | atgttttaaaa |
| 30181 | ttgtaataat  | tgattgtaa   | ttaaaaatag  | atttttgtaa  | aattctctat  | ttgaccttac  |
| 30241 | ccagaaaaag  | tagagagaaa  | gttaagacgt  | ttttatcatg  | agaataaaatt | gtgcaggaat  |
| 30301 | gcaatagtta  | atagtagaat  | gtctacgtta  | tttgttataa  | aagattttcta | tgtattcaaa  |
| 30361 | tatggcagtt  | ctggtttggt  | gagcgagaag  | tatcaataag  | cagctccctt  | ttaagtgaac  |
| 30421 | ttttctgcaa  | cagagttatc  | gtaacaacag  | cccttatggc  | tcatgctgga  | aatgatgttt  |
| 30481 | tttgatttca  | atagaaattg  | gtaattttga  | gaggtatact  | gtgacccttg  | atcgctatgt  |
| 30541 | aacagcagat  | ttttatcggg  | tttgcgttta  | tcaacggcca  | tcaataaaga  | atctataact  |
| 30601 | aattatcatg  | ttactcatta  | accaccatgc  | gtgaatatag  | gtcaattatt  | gccgccaaca  |
| 30661 | accttcttta  | gtttttatgt  | aggtaatccc  | aaactttatt  | tggctgatca  | gtagtaaaat  |
| 30721 | tttgatccaa  | tgtgttcgga  | gccacaactc  | ggttgcttat  | ttgctgtttt  | ttatttttga  |
| 30781 | accttcgtct  | aagcttggtt  | ttaatgccat  | tttcttgcat  | aacactttgt  | actgttttaa  |
| 30841 | tttttgcccta | aagcttttaa  | ttcagcgtga  | attttagggg  | ctccatatct  | gcatttagaa  |
| 30901 | tgcttgatgt  | attttttgaa  | tatctgctag  | aagcccttct  | tttgctaatt  | ctttactgct  |
| 30961 | tttttcctta  | gcaaccaata  | ccaccagtac  | aaaaccctac  | atagttcctg  | tgttttatag  |
| 31021 | caatttctat  | ataaaagaat  | actttactct  | ttttctttgc  | ccagggtctt  | ttttaagatg  |
| 31081 | tctcttttctc | ttattagctc  | ttttttttaga | tcaaatcttt  | ctttgtcata  | aggagccttt  |
| 31141 | gcctggaaat  | gcgtatgctc  | cagacatttt  | tccatcatat  | tttcttaact  | aacatactgc  |
| 31201 | catctatacc  | tagatctttt  | gctatttttg  | tacttgcttg  | acctgtttct  | ttaaccagct  |
| 31261 | taacagcttc  | taatttgaat  | tctgctgtat  | attctcttct  | atgtgtcata  | ttttgaaaaa  |
| 31321 | acgtttttatt | ttactccaaa  | aacgtcttaa  | ctttctctct  | actttttctg  | gactactccg  |
| 31381 | aatcggttga  | caaattggac  | gtttgataag  | cataatttgg  | agcttcttgt  | gtaatgacta  |
| 31441 | tatcatgagc  | gtgactctct  | cttaatcctg  | atgcagtaat  | agtaacaaat  | ttacaatttt  |
| 31501 | ttttcatctc  | ttctataattc | ctattaccag  | tataccccat  | tgcagcttgc  | aatccgccaa  |
| 31561 | tcaattgatg  | gattactcct  | gaagctggac  | ctttgaaatg  | aactcttctc  | tccactcctt  |
| 31621 | gtggaactaa  | tttgagtttt  | gaatctttat  | cttgaaaaata | acggctagct  | gaacctcggt  |

|       |             |             |             |             |             |             |
|-------|-------------|-------------|-------------|-------------|-------------|-------------|
| 31681 | tcattgcact  | aatagatccc  | attcctcgat  | agcctttata  | tgctctgccc  | ttatacataa  |
| 31741 | taatctcacc  | tgggcttttcg | tcagtgccag  | caaaaatcga  | accaatcatc  | acagagtcag  |
| 31801 | caccagctgc  | aatagctttt  | gcaacatctc  | ctgagtattt  | taccccacca  | tcagcaatta  |
| 31861 | gtctgacgtt  | tcttgctcta  | cacgcctctg  | caacattctt  | gattgcagag  | aattgtggca  |
| 31921 | caccaacacc  | tgtaactatt  | ctgggtgtac  | agattgatcc  | tggtcctatt  | ccaaccttca  |
| 31981 | ctgcatcaac  | acccgcatca  | atcaacgctt  | cagcagcctc  | ctttgttgca  | atgtttccgc  |
| 32041 | caattaattg  | cgtattagga  | tacatctttt  | ttatttccct  | aatgggtattg | ataacgtttt  |
| 32101 | cggaatgacc  | gtgagcagta  | tccacaacaa  | ctacatcaac  | ttcttctccg  | atcaaagctt  |
| 32161 | cacatctgtc  | tataccatct  | tttttaccag  | tgccaattgc  | agcggcaact  | ctgagacgcc  |
| 32221 | ctttactgtc  | tttacctgaa  | tttgggtatc  | tattgtattt  | ttcaatgtct  | ttaaccgtaa  |
| 32281 | ttaaacctat  | acaacaagaa  | ttttcatcta  | cgaccaaag   | cttttctatt  | ctattttcat  |
| 32341 | gcaacaattt  | cattgctgag  | gcactattca  | ctccctgctc  | ccgactgtc   | actaacttat  |
| 32401 | cttttgtcat  | cacttcggaa  | actttttacat | tcatgttctg  | gtcttcaata  | aatctcacat  |
| 32461 | ctcgggttagt | taaaattcca  | actaacttgc  | gttgatcgac  | tacaggaatg  | ccagaataat  |
| 32521 | tgtgctctct  | cattaatgaa  | attgcttccg  | caactgtttt  | atccggtgaa  | atcgtaattg  |
| 32581 | ggttatacac  | gatccaactt  | tcatattttt  | tcacccttct  | tacttctaaa  | acttgttcat  |
| 32641 | ctattgataa  | attcttatgt  | atgcaacctt  | tccctccatg  | ttgggcaata  | gctattgcaa  |
| 32701 | agcccgatcc  | agtaacagta  | tccattgcag  | aggatatgag  | agggatattt  | agttctatac  |
| 32761 | tatttggttaa | ataagttttt  | gtatctgcat  | cgcaaggcaa  | tatattagaa  | taggctggca  |
| 32821 | aaagaagtat  | atcgtaaac   | gaataacaag  | cttccatttt  | tttcataggc  | tttatttaaa  |
| 32881 | gcttatacgc  | caattaatta  | aattgcaata  | ggcaaaaatta | gctaggagcc  | tttaattgta  |
| 32941 | tagctctaac  | tgtttttagg  | agatagaaaa  | gctatatagt  | tgctaataca  | ttttattgca  |
| 33001 | aaataagcat  | tctacattat  | ttgccagcaa  | acaaaactgc  | tcaatagtta  | agttttctgg  |
| 33061 | acgctgggtt  | ccgctcaatt  | tagcgttttc  | aaggacagtt  | tcagcgtggt  | tcgttatatt  |
| 33121 | ttgcaagcta  | tttctcagca  | tctttcttct  | ttgagaaaaa  | acagcacgtg  | ttaatcttgt  |
| 33181 | taaggtttcc  | aaatttactg  | caaatttttg  | gataggcaaa  | ggatttactg  | taattactga  |
| 33241 | agaatgtatt  | tttgggtctt  | gaaaaaactc  | tttaggttca  | atatcaaatt  | ccttttttat  |
| 33301 | atcacatagt  | aactggctta  | gcactgataa  | ggaaccataa  | tctttagaat  | tgggtccttg  |
| 33361 | cgtaatgcga  | tctgctacct  | ctttttgaaa  | cattaatgtc  | aagttcgtaa  | aaaattttat  |
| 33421 | attatttaac  | cactttaaaa  | ataacactac  | cgagatatgt  | taaggcaagt  | tagcaataac  |
| 33481 | tttaactgga  | cgttctatca  | gctcttcttc  | tataacgtgc  | agtgcactct  | cttctataat  |
| 33541 | tttatacttt  | ccttgatgct  | catttagcag  | ttgatcatgg  | tgttttacta  | aatctctatc  |
| 33601 | tttttctata  | gaaagtagag  | actttggatt  | atgcaccaat  | atttctcttg  | ttaatgcacc  |
| 33661 | atatccagga  | ccaatttcaa  | tgacattaaa  | attctccaga  | ctagcagcta  | aagcgactat  |
| 33721 | ttttttgtta  | tctcactcga  | taaaataaaa  | ttttgcccta  | gactcttttt  | tggcttcagt  |
| 33781 | aaaaattttt  | tcatattatt  | ttcattatac  | agtatttttaa | aaattagttg  | actaaaattc  |
| 33841 | attgataaatt | gtatattatt  | aatgtgttta  | acgccggctt  | agctcaattg  | gtagagcaac  |
| 33901 | tgacttgtaa  | tcagtagggt  | gtcagttcaa  | gtccgacagc  | cggcactctc  | actcatataa  |
| 33961 | gtaaagttga  | tgtccttttt  | aatagtagca  | aattggaaaa  | tgaatggaat  | gcgttcttca  |
| 34021 | tttgttgact  | ttataggcaa  | acttaacaac  | aagagcaacg  | aaattacctc  | taagctagt   |
| 34081 | atttgccttc  | ctttttacatc | atttccaagc  | agtatagagt  | tgaacaataa  | tattaatata  |
| 34141 | ggagcacaga  | attgccatca  | taaaaagttc  | ggttcttaca  | caggtgaaat  | tagtgcagaa  |
| 34201 | atgttaaaaag | aactaggggtg | tacttacgta  | atacttgggc  | attctgaaaag | ggctaatagaa |
| 34261 | aaagatagtg  | aaataaaaact | taagtccgaa  | atagcaatag  | aatcaggctt  | acacccaatt  |
| 34321 | atctgtgtag  | gtgaaaaattc | agaagattat  | agaatgaaa   | aaacaaaaga  | agtaatagaa  |
| 34381 | tatcaatgta  | aaaaccgctt  | gccaacacac  | ggtgaatata  | ccgtagcata  | tgagccaata  |
| 34441 | tgggcaatag  | gcacaggtca  | tgtgccaaat  | aatgatgcaa  | ttgctaagggt | gatagaggta  |
| 34501 | ataaaaattgt | gtactagtaa  | aaaacacatt  | atatatgggtg | gttcagtcag  | ttcagaaaaat |
| 34561 | atagaaaatt  | tgtctcagtat | ctcaaatttt  | tcaggagttt  | taattggcag  | tgcaagctta  |
| 34621 | gatttctgatc | actttttataa | aattatacaa  | caagttgaaa  | aaaagttttc  | tcttatcaat  |
| 34681 | tctaaaatca  | gcaactaaga  | atcctataac  | aaatgacatc  | atttccagtgt | caagcatata  |
| 34741 | tagctaacc   | aagaaagggt  | tccctacgtc  | ataccgcat   | tcattcgcgg  | tatctctaga  |
| 34801 | tcccgctaac  | acgtagcggg  | atgacgaatt  | tgttggtttt  | caaattgtag  | gtaaacctaa  |
| 34861 | gccacttttag | ctatatctgt  | acgaacatct  | agtaaaaacga | cctagctata  | gctaaagtaa  |
| 34921 | tctagaaaaat | taacgatatt  | ttattccccg  | gggaacgctc  | tattctgttt  | tccaactcta  |
| 34981 | gttccaaaag  | agccattaga  | gctatgttgg  | tagaaaagtcc | gcttgctaata | ataagttcat  |
| 35041 | ctatatcaac  | aggtacagag  | ttaatatgat  | caactataac  | agatttttgcc | tgttgtaatt  |
| 35101 | tttcttggtt  | ttgggttaaca | gcatagtgtc  | caacatcaaa  | tagttttttt  | tgtctgcggag |
| 35161 | gtagactaaa  | cctaatactc  | tctattatgt  | catcagcgga  | ttcgataagc  | ttagcaccgt  |
| 35221 | ttttaattaa  | ataattacta  | ccactacagc  | gtgaatctaa  | agggaaacca  | gaaactgcaa  |

|       |             |            |            |             |             |             |
|-------|-------------|------------|------------|-------------|-------------|-------------|
| 35281 | acacctctct  | cccttgat   | aaagcaaa   | ctgctgtt    | tagagagcc   | gaacgttt    |
| 35341 | atgcttcaat  | cactgcaac  | cctagcgat  | ggccagata   | aattcgatt   | ctctgagg    |
| 35401 | aatactgagg  | ctttggttt  | gtagcaaat  | gaagctcag   | aattactaac  | ccaccgttc   |
| 35461 | cagtgat     | tttgtatag  | tcaaaattct | cttttgata   | caccacatca  | attccgctt   |
| 35521 | ctgtaacagc  | aatagtggg  | tgat       | atattacact  | gtttgctgca  | gtatcgatt   |
| 35581 | cttttgcaag  | tccagaaacg | ataacaaaac | cagcttcgct  | taaatcaagt  | gccaaacttat |
| 35641 | tggcaaaatt  | tcttccattc | attgaagagt | tacgcccacc  | gattattgca  | attatctcac  |
| 35701 | ggcttaataa  | tgatatatca | ccaagcgcag | ttattacagg  | aggacaacta  | gagatatttc  |
| 35761 | ttaaaagatc  | agggtaatct | gggtcacatg | cggtataat   | tttagctcca  | attctttctg  |
| 35821 | cattattgat  | ttcttctcgt | gcctcttgaa | tgccatacac  | cttattatta  | gccaccctat  |
| 35881 | tgagatat    | tagcacctca | tctagcgatc | catgtgttct  | tagtatacta  | aaaaactttg  |
| 35941 | ttggctctat  | agttctagcc | aagcttaacc | atacttctaa  | ttctttgttg  | ttcaatttat  |
| 36001 | ttatcttc    | aaaaggcttg | aatttcttat | caatttagtg  | taccaagat   | aatgcaaata  |
| 36061 | tacagtgtt   | tatgacgc   | tttgttacag | ataaatgcat  | aaaatgtaaa  | tatacggact  |
| 36121 | gtgtggaagt  | atgtcccg   | gactgcttct | atgaaggtaa  | aaacatgctc  | gtgattaacc  |
| 36181 | cagatgaatg  | tattgattgc | ggagtgtgca | tacctgagt   | tccagtagat  | gcaattgtaa  |
| 36241 | ctgatgattc  | cataaaagat | attttagaac | tagatgaaga  | gttactgaac  | agtgaacaaa  |
| 36301 | aaatcttcaa  | atcattttac | aacataaacg | tagaatactc  | acaaaaatgg  | ccaaatatca  |
| 36361 | cagctaagaa  | gcaacctctc | tatacagcag | aagagtataa  | ggaaaaaaag  | gataaaacaa  |
| 36421 | cttattttga  | ggaaaattta | gaataatact | gctgaaggaa  | aagaaacttt  | ttgtatttca  |
| 36481 | gggttattgt  | ttttggttgc | tgaaaatagt | tgcgttatct  | aagttgttat  | gctgataaat  |
| 36541 | tagtatcgat  | taatttaagg | attaaggaaa | aaggcttatt  | gacttttgaa  | atatttgatt  |
| 36601 | ataaaactag  | ctgttagcat | taaatcttgg | gggtaagtta  | tgagtataaa  | taaaagagaa  |
| 36661 | accattaaaa  | agattgaagg | gttacttttt | caagcgaacg  | gtaatcttga  | aaaaacatgt  |
| 36721 | gatctattat  | caacagtaaa | gttaaccgaa | gatgatatta  | aaatattgct  | ggaagagatg  |
| 36781 | ataaaagagt  | attatagctt | gtttaaaaag | atttcttgga  | gttggtggaat | tactgcaggc  |
| 36841 | ggtgcacaag  | atgccaacgc | aagcagcttc | aacgaagctt  | ataagttagg  | ttcaaaagag  |
| 36901 | ttagcattgg  | caataatgtc | agattttaag | aagtcttatg  | atcaagaatt  | attcaagaaa  |
| 36961 | tataaaaagg  | aagaaatgtc | ttatcctgaa | ggagaaggag  | tacaatttat  | tagagaatta  |
| 37021 | agagttctaa  | gtagaatact | tactatatct | ttaataagga  | aacttgatga  | agtttactcc  |
| 37081 | agaagaaatt  | gagcgtttga | aggaatatat | attagttagc  | aactatgata  | caagcaaaag  |
| 37141 | tctttctgat  | atagacaaat | atatgcatgc | actatctgcc  | ttaattagaa  | accctcact   |
| 37201 | tgatacaaaa  | aagatat    | agctaaataa | tcaaatgata  | atacacacta  | cagccttaat  |
| 37261 | tgatttagta  | actagtggag | tagtgaaaaa | agaagaagca  | aaagaacaat  | ctgctgagga  |
| 37321 | tttagaaaaag | cttgtctgtg | aacagtataa | aggtgcagca  | aacacgccag  | taccgttgcc  |
| 37381 | gagcacgcta  | tttgaagtgg | ataaaaaaag | tgcttaaagg  | aaagtaagaa  | ggtcttatag  |
| 37441 | ttagccaaag  | taggtattta | ataagcttaa | tgtaaccatt  | atatatgcta  | tatagtaaaa  |
| 37501 | catagaatgc  | ttatggttcc | aactatagca | attttaagt   | gtgggttttc  | ttgtgagaga  |
| 37561 | gaaatatcgc  | ttatgagcgg | aaaagcagta | aagaaggcgc  | tcgatagcct  | ttcatataat  |
| 37621 | gcaatagaaa  | tagatgttga | cagtaacatt | gctgaaaagc  | ttagaaaaat  | taattcgggc  |
| 37681 | cttgctttta  | tcgctctgca | tggaccttat | ggtgaagatg  | gctgcattca  | aggtttattg  |
| 37741 | gagattttag  | gtataaaata | tacacactca | ggagttagtg  | cttctgctgt  | tgctatgaat  |
| 37801 | aaagtgatgt  | caaagcatat | atttcgggtc | cttagtatcg  | acactccaaa  | aggttatgta  |
| 37861 | attagccgag  | aagatctact | aaaaataaat | attaaaaatcg | attatccgta  | cgtcttaaaa  |
| 37921 | ccaattaatg  | aaggttcaag | tattggagt  | tacataat    | tctcgcacga  | ggattactta  |
| 37981 | gaactgaaag  | ataatagttc | tactataatg | gaaaagatga  | tcgtagaaga  | atacataccg  |
| 38041 | ggcatagagt  | tacatactgc | tgtattgctg | gatgaagcaa  | ttggcactat  | agaagtacga  |
| 38101 | ccaaaaaata  | aattctatga | ttatgaagca | aagtatacag  | atggatttgc  | agaacatata  |
| 38161 | tttcccgctg  | aaattcctaa | caatatatat | aaaatgacct  | tggaacacgc  | actgaaagtt  |
| 38221 | catcaatttt  | taggatgcaa | aactatttcc | cgctcagatt  | tccgttataa  | tcccaaaaat  |
| 38281 | aacactttta  | aaatgcttga | gattaatata | catcctgggt  | ttactgagtt  | atcgttagt   |
| 38341 | ccagaaattg  | caaaattggc | aaaaggaatc | aattttaatg  | aattagttta  | aattattatt  |
| 38401 | gaagatagtt  | tgcagcacaa | aaatattagg | gatttaagtc  | atgttgagca  | gtattactag  |
| 38461 | aagccaaagg  | agttttttgc | gtaagtgtgc | cttgggtatt  | atcacagcac  | tttttcttaa  |
| 38521 | gctaatactt  | tacagctcac | ttgataaaa  | aataaatcga  | tttaattact  | actttacttg  |
| 38581 | gtataatgac  | tgcctatcta | gtttattact | cagtagtgga  | ttttcaatcg  | acgaagtagt  |
| 38641 | cgtgagcggc  | aataaattta | caaacaaaaa | ggatattcta  | agtttgacag  | atagaacgca  |
| 38701 | acctatcctg  | tatatatcac | tttcaaaact | tgccggtaac  | atacaatccg  | taagcaggtg  |
| 38761 | gataaaacac  | gtaagagttc | acagaatttt | gccaataact  | ctacacatta  | atatagatga  |
| 38821 | gcataaac    | tttgctctct | ggaaagataa | taacaaaacc  | tcggtaatg   | attttgaagg  |

|       |             |             |             |             |             |             |
|-------|-------------|-------------|-------------|-------------|-------------|-------------|
| 38881 | taaagtgatc  | gtagatgact  | atctagtaga  | tgatcttggt  | gtaattaaag  | gacaaaactc  |
| 38941 | gttatcaaac  | ctagaatttg  | ttagagatgt  | gttgagagat  | aaaactcaat  | taagagacca  |
| 39001 | catttcttct  | tttgcttata  | tagggaatag  | aagatggaat  | atcatacttg  | ataacgattc  |
| 39061 | cacagtaaaa  | ctgcctgaag  | ataaccctta  | tagtgcattg  | gactatttta  | accacttaca  |
| 39121 | caatacaact  | gattttactt  | tcagcgattg  | gagtattatt  | gatatgcgta  | ttactgataa  |
| 39181 | aattttttgtg | aagaggtgat  | ctgctgtcat  | ccaagtagcc  | ccttttctctg | tcattcccagt |
| 39241 | gcccagacac  | tggaatcccg  | ccgcgaaccg  | tcataccgcg  | attcattcgc  | ggtatctcag  |
| 39301 | ccgctaacaa  | gagatcccg   | taacaagcag  | cgggatgacg  | attgtcgttt  | agccataaat  |
| 39361 | attaagaaat  | ttaccaaagt  | aaaaaaaggc  | aaaagaagcc  | ccgtggttgg  | ctaattactt  |
| 39421 | acattatact  | ttcaagtatg  | gcgttttttt  | attctaaacg  | tttaataacc  | gcgattcagt  |
| 39481 | tgctttttaag | ccgcaactaa  | tctaaattat  | aaacattaag  | aaattttacta | aacagaaaaa  |
| 39541 | aaggcaaaaag | aaaccctagg  | gtagctagtt  | attcactatc  | catttttttaa | gttggcggtt  |
| 39601 | ttttatgttt  | taaatgcttt  | ataagcgcac  | tttagcttat  | attaggtaaa  | aacctagaat  |
| 39661 | tttataaaga  | cataaggtgc  | acatagtgc   | aaaaattaaa  | catgaaacgc  | cagatacgtg  |
| 39721 | agttttttttg | tcattttaatc | tgtacagaga  | agataaataa  | atagcttcag  | tttcatgata  |
| 39781 | agggggctgg  | cgaggtttgt  | caaggaattt  | ttatgcaaga  | gatctattga  | aatgccctg   |
| 39841 | taaaattata  | ctattaatta  | gtacactata  | aattttaa    | tatagatatg  | ttaagcagat  |
| 39901 | tggttaatttt | gctattagtt  | tttatacttc  | ccttttcttc  | atactcatat  | cagtttagaa  |
| 39961 | ccaaagcaaa  | gcaagcagta  | gtcttagatt  | tagcttcaga  | ctcattcatt  | tttgaccata  |
| 40021 | attctgatga  | aaaaatggcc  | ccatcttcaa  | tgagcaagct  | aatgacttta  | tatatagcct  |
| 40081 | tcgattatct  | aaaagctgga  | ataatacaca  | tgaggagata  | atttcgagta  | agtagaaaag  |
| 40141 | cgtgggaaag  | gagaggtctc  | tccatgtttt  | tgaaagaagg  | tcaatccgtt  | acggtgaggg  |
| 40201 | aattacttga  | aggaattaca  | atagtctcag  | gcaatgatgc  | ctgcataaca  | ctagccgagg  |
| 40261 | gcattgcagg  | atcagaagag  | aattttgtgg  | ctgaaatgaa  | tgaagttgca  | caaaatttga  |
| 40321 | atctgaatga  | cagtcatttt  | gtcaactcaa  | gcgggtggcc  | agatgaagat  | cattttatga  |
| 40381 | acgcaaaaaga | cttggtaatg  | ctggcaaaaa  | ggattttcac  | cgattttcct  | gaatattatg  |
| 40441 | attttattttc | cgaacaatat  | ttgacatata  | atgaaattgt  | acaaaagaat  | aaaaatcttc  |
| 40501 | tacttttttca | cgatattggg  | gttgatggct  | taaaaaccgg  | ttatacaaat  | gctggtggtt  |
| 40561 | acggcattgt  | agcatctgca  | aaacgaaatg  | ataggagaat  | ttttgctgtc  | gtaaatgggt  |
| 40621 | taaacactga  | gaaagagcga  | atagaagaag  | caaaaagatt  | gatacaatac  | tccttaaate  |
| 40681 | attttaacac  | taagaaaata  | ttcgttaaag  | acagcgtagt  | tgaggaagta  | aatgttctct  |
| 40741 | atggaaaaga  | tagaaaagtg  | cctattacag  | ttgcaaacga  | tgttaccata  | acttacaacc  |
| 40801 | gcaaatgca   | tgaccaaatt  | aaggtgcgta  | ttgaatataa  | agatatgata  | cctgcaccca  |
| 40861 | ttaaaaaagg  | tcaagaagtg  | ggcaaagttt  | ttgtagaaat  | accaggtatt  | gagcaacaaa  |
| 40921 | ctacaccact  | ttatgcagca  | aatgacgtgc  | aggaattgaa  | tttcgtagaa  | aagtttttta  |
| 40981 | ggatgttggt  | ttaagtttga  | tattaaagca  | attccgaaag  | agagatctat  | tgcactttag  |
| 41041 | tgtagtttta  | actaacaatt  | tctgttacaa  | tacaagattg  | aaatgttacg  | aaaatgtgct  |
| 41101 | ggttgatatt  | gttgctgtct  | agtatcctag  | agatactgtg  | ggctgtaacg  | ctaaagttta  |
| 41161 | gtaacagttt  | tactaaagtt  | gtgccttcga  | ttgcaacatt  | ggtaattatg  | atcattagca  |
| 41221 | tttacttttt  | atctcttgca  | gcatgctttc  | tacctattag  | ggtatgctat  | gcagtttcct  |
| 41281 | ctggaatatg  | cacaattgga  | ataactataa  | ttggtgcaac  | cactttcaca  | gagaatatta  |
| 41341 | atttatctca  | agttttatgt  | atcgttttta  | ttgtaatagg  | aagcataggg  | ctgaagctct  |
| 41401 | ctattttaaac | ctaaaaattt  | atgcatgaat  | tgatatattt  | tactcttatc  | gtcactaatt  |
| 41461 | gaagtgttct  | gggtcataac  | acttaagcat  | agttatggat  | ttactcatct  | cgtaccatca  |
| 41521 | ataattagca  | tactctccat  | ggctcttagt  | acatatattac | tttcgctcgc  | tacacgttct  |
| 41581 | atacctatcg  | gagtatgcta  | tgcaatttgg  | actggagtg   | gcgctatagg  | agcttcgata  |
| 41641 | cttggagttt  | acctatttga  | tgaaccagtt  | aattttattcg | aagtaatatg  | ctttatttta  |
| 41701 | gttacattcg  | ggattatagg  | attaaaaattg | tttgatactg  | caaaacaaac  | tggtgataaa  |
| 41761 | atggaataaa  | agatcccact  | gggatgaaag  | aagcagatac  | tccatattgt  | catgcaaatt  |
| 41821 | ggaatccaga  | cttttttcta  | tatagcatgg  | tgaagacggg  | aaaccgtaac  | cgttcacaca  |
| 41881 | atggcgtcaa  | cttaaggaaa  | aatatcagcg  | atagtgata   | aaatttctct  | ctaaattttt  |
| 41941 | tatcattaaa  | ttatccaaag  | agtgcagg    | acagcacttt  | tgtttctggt  | ttatttcaac  |
| 42001 | aaagaagtct  | aaaatgtgtc  | cttttttaggt | gaaatatgca  | aaaaggaaaa  | aacctatttc  |
| 42061 | tacaaattaa  | aaatataata  | tactcgaaaa  | cttttcagaa  | aatccattgt  | gttgagtttt  |
| 42121 | acacgaacaa  | gaaaacttcc  | tttttcgaca  | gtattttcta  | tgatttttaa  | gttagttaaa  |
| 42181 | aaaagtttgg  | gaatagaatg  | tgaacttatg  | gagccattga  | catgtaccct  | caaagcaagc  |
| 42241 | tttttctaaa  | gcaaggtata  | agatttgcca  | tacaggcttt  | caagaattta  | agcatccaaa  |
| 42301 | cagcctatca  | ggatgaacct  | gagttggaga  | ggctatagac  | ttattgcagc  | agatggttct  |
| 42361 | ggtatgagat  | taccagctc   | tggggaaatt  | gtatccgagt  | ttgaaccaa   | tggaacaaca  |
| 42421 | ggcaccattg  | gcaatttggt  | tggtgatttg  | tgtacttcgc  | taattttag   | tgctcgtctt  |

```

42481 gcagcttgga atataggtga acaaacgttg gcggcagagc aattacccga agttatcact
42541 caaatgcggtt tattaatatca agagaaatta ttatttatct atgatcgtct tcagtaaaat
42601 tcattcagca gcattatgat ttggaagtag attttatttt tcgcttgcaa aaaagaaatt
42661 atagtaagct atgggaacgc tggcgaatta gattttgatt ttatattaga aaatgaaaag
42721 ctaaaaaata aaatgaaagg acagaaagta agagttatag tgctgacatt agccaactga
42781 ga

```

```

//
LOCUS      JAQZAU010000067          35791 bp    dna        linear    ENV 17-MAR-2023
DEFINITION MAG: Wolbachia pipientis isolate wEsol contig_39139, whole genome
            shotgun sequence.
ACCESSION  JAQZAU010000067  JAQZAU010000000
VERSION    JAQZAU010000067.1
DBLINK     BioProject: PRJNA929258
            BioSample: SAMN33142973
KEYWORDS   WGS; ENV; Metagenome Assembled Genome; MAG.
SOURCE     Wolbachia pipientis (insect metagenome)
ORGANISM   Wolbachia pipientis
            Bacteria; Pseudomonadota; Alphaproteobacteria; Rickettsiales;
            Anaplasmataceae; Wolbachieae; Wolbachia.
REFERENCE  1  (bases 1 to 35791)
AUTHORS    Fiutek,N., Couger,B.M., Roy,S., de la Torre,J.R. and Connor,E.F.
TITLE      Genomic assessment of the contribution of the Wolbachia
            endosymbiont of Eurosta solidaginis to gall-induction
JOURNAL    International Journal Molecular Sciences
REFERENCE  2  (bases 1 to 35791)
AUTHORS    Fiutek,N., Couger,B.M., Roy,S., de la Torre,J.R. and Connor,E.F.
TITLE      Direct Submission
JOURNAL    Submitted (10-FEB-2023) Biology, San Francisco State University,
            1600 Holloway Ave, San Francisco, CA 94132, USA
COMMENT    ##Genome-Assembly-Data-START##
            Assembly Date          :: JUN-2019
            Assembly Method        :: FLYE v. 06-2019
            Genome Representation   :: Full
            Expected Final Version :: Yes
            Genome Coverage        :: 100.0x
            Sequencing Technology  :: Illumina HiSeq; PacBio Sequel
            ##Genome-Assembly-Data-END##
FEATURES   Location/Qualifiers
            source                1..35791
                                   /organism="Wolbachia pipientis"
                                   /mol_type="genomic DNA"
                                   /submitter_seqid="contig_39139"
                                   /isolate="wEsol"
                                   /isolation_source="galls on Solidago altissima"
                                   /host="Eurosta solidaginis MN-2018-EFC"
                                   /db_xref="taxon:955"
                                   /environmental_sample
                                   /country="USA: Cowling Arboretum, Carleton College,
                                   Northfield, MN"
                                   /lat_lon="44.48 N 93.13 W"
                                   /altitude="280 m"
                                   /collection_date="2018-11"
                                   /metagenome_source="insect metagenome"
                                   /note="metagenomic"
            gene                  236..970
                                   /locus_tag="wEsol_00739"
            CDS                   236..970
                                   /locus_tag="wEsol_00739"
                                   /codon_start=1
                                   /transl_table=11

```

```

/fullproduct="qcoverage 100 , hcoverage 100 , similarity
100 , identity 100 , evalue 2.13e-168 , alnlength 244 ,
Bacteria , Proteobacteria , WP_015589136.1 MULTISPECIES:
3-oxoacyl-[acyl-carrier-protein] reductase [Wolbachia]"
/cog="FabG COG1028 251 Dehydrogenases with different
specificities (related to short-chain alcohol
dehydrogenases)"
/pfam="Shikimate_DH Pfam-B_3397 adh_short KR
NAD_binding_10 Epimerase Saccharop_dh adh_short_C2"
/tigr="TIGR01830 3oxo_ACP_reduc 239
3-oxoacyl-[acyl-carrier-protein] reductase"
/product="3-oxoacyl-"
/translation="MLKLESRKFLITGASGGIGQAIVKIMHKAGATLCISGTKKEVLE
EVAKQYEKNMHVLPDLSNAEEVNQLINRASELMEGFDGLVCNAGITRDSLLLRMTDE
AWQKVIDINLSSTFKLSREACRKLKNNWGRIINISSIIGLTGNAGQANYAASKAGII
AMSKSIAKEVASRNITVNCIAPGFIDTKMTEVLNEGQKGKILDNIPMKRMGTGEEIAA
GVLFLASDEAKYITGHVLNINGGLFM"
/besthit="qcoverage 100 , hcoverage 100 , similarity 100
, identity 100 , evalue 2.13e-168 , alnlength 244 ,
Bacteria , Proteobacteria , WP_015589136.1 MULTISPECIES:
3-oxoacyl-[acyl-carrier-protein] reductase [Wolbachia]"
gene 1066..1401
/locus_tag="wEsol_00740"
CDS 1066..1401
/locus_tag="wEsol_00740"
/codon_start=1
/transl_table=11
/pfam="TrbC"
/fullproduct="qcoverage 100 , hcoverage 100 , similarity
100 , identity 100 , evalue 4.12e-74 , alnlength 111 ,
Bacteria , Proteobacteria , WP_007550269.1 MULTISPECIES:
TrbC/VirB2 family protein [Wolbachia]"
/translation="MSSIIGFFGVLCVLLFSFSGYADNPGVDMDDTTKVICNIIGYV
WGIGGPLMTVVIIGAALLAIFGRMPWPALFALGMFCGVFFGAKTIITKIMPVNSDEAK
TMLEKCGQK"
/product="TrbC/VirB2 family
protein"
/besthit="qcoverage 100 , hcoverage 100 , similarity 100
, identity 100 , evalue 4.12e-74 , alnlength 111 ,
Bacteria , Proteobacteria , WP_007550269.1 MULTISPECIES:
TrbC/VirB2 family protein [Wolbachia]"
gene complement(1429..2709)
/locus_tag="wEsol_00741"
CDS complement(1429..2709)
/locus_tag="wEsol_00741"
/codon_start=1
/transl_table=11
/fullproduct="qcoverage 100 , hcoverage 100 , similarity
100 , identity 100 , evalue 1.62e-291 , alnlength 426 ,
Bacteria , Proteobacteria , WP_012673175.1 MULTISPECIES:
M48 family metalloprotease [Wolbachia]"
/cog="COG4783 COG4783 484 Putative Zn-dependent protease,
contains TPR repeats"
/pfam="Peptidase_M48 Pfam-B_1978 Pfam-B_1799 Apc3
Pfam-B_333 TPR_11 TPR_12 NARP1 Pfam-B_1822 TPR_16 TPR_11
TPR_2 TPR_12 TPR_1 Pfam-B_392 Pfam-B_324 TPR_11"
/product="M48 family
metalloprotease"
/translation="MFRVAKFLTLLFFAYCNNAYSINIIRDSEVEAIVKELAQPLFS
AADIDHEQIKVFIINDNSINAFVINNNSIFIHLGLLQYSAKPYVLLGILAHEIAHISA

```

```

GHILQMSSAMGYFQSIAMISYMVGLVSSIIINPQVAGAILLSGVAFSSRLFFNYSQEQ
ESVADSYALRYLDESGYDNSGMKEIFDYFKSIEHENTEEYFRTHPLSEKRIFAVQNYK
VKNNVKPIFADKLLKFERVVAKLDSFFAPIHVLNSKYEDNSEYVNAIVCYRQKGIEEA
IAKVNSLIQESHSDPYLYELKAEMLYKAGNLSEAIKMYEESLRYLSEKNSYLVKLALS
HTLLHGDAKKAIFYLEQILNVEPNNAFVWKYLSIAYKCEADTAMHYFALTKKACIEG
DLKQFMKYAELAVKTLPKDSPYLLQVEDMKRFNG"
/blasthit="qcoverage 100 , hcoverage 100 , similarity 100
, identity 100 , evalue 1.62e-291 , alnlength 426 ,
Bacteria , Proteobacteria , WP_012673175.1 MULTISPECIES:
M48 family metalloprotease [Wolbachia]"
gene complement(2781..3425)
/locus_tag="wEsol_00742"
CDS complement(2781..3425)
/locus_tag="wEsol_00742"
/codon_start=1
/transl_table=11
/fullproduct="qcoverage 100 , hcoverage 100 , similarity
100 , identity 100 , evalue 2.33e-148 , alnlength 214 ,
Bacteria , Proteobacteria , WP_007549343.1 MULTISPECIES:
3,4-dihydroxy-2-butanone-4-phosphate synthase
[Wolbachia]"
/cog="RibB COG0108 203 3,4-dihydroxy-2-butanone
4-phosphate synthase"
/pfam="DHBP_synthase Pfam-B_7664"
/tigr="TIGR00506 ribB 204
3,4-dihydroxy-2-butanone-4-phosphate synthase"
/product="
3,4-dihydroxy-2-butanone-4-phosphate synthase"
/translation="MVQATYASMSLPGISSVEDVLEDARSGKLFILVDDENRENEGDL
IVLAEKIKPEHMAFMVRYGTGVVCLAMTKFHKRLGLNFMKKKNIGENHTAFTTSDA
RYGITTGVSAEDRTKTIHAAINKDGTQDDIITPGHVFPVIAHKGGVAQRAGHTEASVE
MAKLVGFDHSAVICELVNDDGSMMRLPQLLKFAEQHKIKLTTIDKLISYVKNLN"
/blasthit="qcoverage 100 , hcoverage 100 , similarity 100
, identity 100 , evalue 2.33e-148 , alnlength 214 ,
Bacteria , Proteobacteria , WP_007549343.1 MULTISPECIES:
3,4-dihydroxy-2-butanone-4-phosphate synthase
[Wolbachia]"
gene complement(3432..3926)
/locus_tag="wEsol_00743"
CDS complement(3432..3926)
/locus_tag="wEsol_00743"
/codon_start=1
/transl_table=11
/fullproduct="qcoverage 100 , hcoverage 100 , similarity
100 , identity 100 , evalue 6.03e-106 , alnlength 164 ,
Bacteria , Proteobacteria , WP_007549342.1 MULTISPECIES:
transcription elongation factor GreA [Wolbachia]"
/cog="COG0782 COG0782 151 Uncharacterized conserved
protein, YhbC family"
/pfam="GreA_GreB_N Pfam-B_5216 GreA_GreB"
/tigr="TIGR01462 greA 151 transcription elongation factor
GreA"
/product="transcription
elongation factor GreA"
/translation="MASSIINKFPMTREGFENMQAELEKLKEEKPSVIQAIKDARDQG
DLSENAEYHAARERLGFIEGRIMEIESKLSHAEVIEVKNLSGDSVMFGATVTLSMLSD
NNGEVEYVYKVVGGEYADVSKQLISTSSPLGSLIGKKVGEYVEVTVPNGEKLYKIVK
IEFK"
/blasthit="qcoverage 100 , hcoverage 100 , similarity 100
, identity 100 , evalue 6.03e-106 , alnlength 164 ,

```

gene Bacteria , Proteobacteria , WP\_007549342.1 MULTISPECIES:  
transcription elongation factor GreA [Wolbachia]"

CDS complement(3936..5477)  
/locus\_tag="wEsol\_00744"  
complement(3936..5477)  
/locus\_tag="wEsol\_00744"  
/codon\_start=1  
/transl\_table=11  
/fullproduct="qcoverage 100 , hcoverage 100 , similarity  
100 , identity 100 , evalue 0.0 , alnlength 513 ,  
Bacteria;Eukaryota , Proteobacteria;Arthropoda ,  
WP\_012673176.1 MULTISPECIES: F0F1 ATP synthase subunit  
alpha [Wolbachia]"  
/cog="AtpA COG0056 504 F0F1-type ATP synthase, alpha  
subunit"  
/pfam="ATP-synt\_ab\_N HAS-barrel ATP-synt\_ab  
ATP-synt\_ab\_C"  
/tigr="TIGR00962 atpA 503 ATP synthase F1, alpha subunit"  
/product="F0F1 ATP synthase  
subunit alpha"  
/translation="MKNSMNVSEIASIIREKVETFDNPIKRENIGEVISVTDGIALVY  
GLEKAKFGEKVFFASGVEGIVLDLDHDTAGIVVLGNDRDVKEGDVVKCSGDVVQVPVG  
HELLGRVVNALGHPMDDGGEIRAKNRMDIESKAPGIIDRKSVEHPLQTGIKIIDLIP  
IGRGQRELIIGDRQIGKTTIALDTIINQKKINDEVNENQKVYCVYVAIGQKISTVAKV  
VNKLKESGALEYTTVVVASASDCAPMQFLAPYAGCTIGEFFRDNGMHCLIIYDDLKSH  
AVAYRQMSLLRRPPGREAYPGDIFYVHSRLLERAAKMSDKKGQGSALTALPIVETQAG  
DVSAYVPTNVISITDGQIFLESELFYKGFRAVNIGLSVSRVGSAAQLKSVKKVAGSI  
KLSLAQYRELEDFAKFGSDLDASVQLSLNKGKYLVELLKQKQHLPMSEIEQVVLMIYF  
SNLYNQLSKIQISYINKFEHDLINYFHTVHPGVLLKLSNDMSDDIKGDIFNIVSNFVT  
QFNCV"  
/besthit="qcoverage 100 , hcoverage 100 , similarity 100  
 , identity 100 , evalue 0.0 , alnlength 513 ,  
Bacteria;Eukaryota , Proteobacteria;Arthropoda ,  
WP\_012673176.1 MULTISPECIES: F0F1 ATP synthase subunit  
alpha [Wolbachia]"

gene complement(5474..6034)  
/locus\_tag="wEsol\_00745"

CDS complement(5474..6034)  
/locus\_tag="wEsol\_00745"  
/codon\_start=1  
/transl\_table=11  
/fullproduct="qcoverage 100 , hcoverage 100 , similarity  
100 , identity 100 , evalue 8.57e-119 , alnlength 186 ,  
Bacteria , Proteobacteria , WP\_010962742.1 MULTISPECIES:  
ATP synthase F1 subunit delta [Wolbachia]"  
/cog="AtpH COG0712 178 F0F1-type ATP synthase, delta  
subunit (mitochondrial oligomycin sensitivity protein)"  
/pfam="OSCP Pfam-B\_17059"  
/tigr="TIGR01145 ATP\_synt\_delta 172 ATP synthase F1,  
delta subunit"  
/product="ATP synthase F1  
subunit delta"  
/translation="MKKTQYNNLVSSYARVLFHVSGSRLGIIRKEVEFLAFFKDQRD  
VFVYLSHPMISFAHKKEVMLSINEHLSNLVKFIMVIFANKRSSLLILILEKFLSLAR  
ENENEFEITIKSAETLKESDIKIITESLSFLGKIIKVSNNVDPISILGGFVVRYGFNLI  
DASLKSYPDRLVDLSKMEILKVRNFV"  
/besthit="qcoverage 100 , hcoverage 100 , similarity 100  
 , identity 100 , evalue 8.57e-119 , alnlength 186 ,  
Bacteria , Proteobacteria , WP\_010962742.1 MULTISPECIES:  
ATP synthase F1 subunit delta [Wolbachia]"

```

gene      complement(6076..6426)
          /locus_tag="wEsol_00746"
CDS       complement(6076..6426)
          /locus_tag="wEsol_00746"
          /codon_start=1
          /transl_table=11
          /fullproduct="qcoverage 100 , hcoverage 100 , similarity
100 , identity 100 , evalue 4.36e-76 , alnlength 116 ,
Bacteria , Proteobacteria , WP_012673177.1 MULTISPECIES:
YraN family protein [Wolbachia]"
          /cog="COG0792 COG0792 114 Predicted endonuclease
distantly related to archaeal Holliday junction
resolvase"
          /pfam="NERD UPF0102 Pfam-B_2097"
          /tigr="TIGR00252 TIGR00252 123 TIGR00252 family protein"
          /product="YraN family
protein"
          /translation="MVSRLRYFVG YFGELLVLVYLKLKWNVIKRRYRCKFGEIDLIV
SKKKELIFIEVKTSLLGKEIPISHLQCQSIINSSKYFLSKNLSFLDYSVRYDLYFLSL
KRRPVYIKNAWIEE"
          /besthit="qcoverage 100 , hcoverage 100 , similarity 100
, identity 100 , evalue 4.36e-76 , alnlength 116 ,
Bacteria , Proteobacteria , WP_012673177.1 MULTISPECIES:
YraN family protein [Wolbachia]"
gene      complement(6450..6878)
          /locus_tag="wEsol_00747"
CDS       complement(6450..6878)
          /locus_tag="wEsol_00747"
          /codon_start=1
          /transl_table=11
          /fullproduct="qcoverage 100 , hcoverage 100 , similarity
100 , identity 100 , evalue 8.70e-93 , alnlength 142 ,
Bacteria , Proteobacteria , WP_007550873.1 MULTISPECIES:
50S ribosomal protein L17 [Wolbachia]"
          /cog="RplQ COG0203 116 Ribosomal protein L17"
          /pfam="Ribosomal_L17"
          /tigr="TIGR00059 L17 112 ribosomal protein L17"
          /product="50S ribosomal
protein L17"
          /translation="MKHGIKKRKLSRCTEHLSTLKNLSISLINHEQIVTTLPKAKEL
RPYVEKFITIAKNKNTLHGRRLLLSRLHNSKLAVDKLLNVLASRYQDRKGGYSRIIKF
STRKGDCA SMAVIELVDRDIAARGKVYSKNKEGGKVVTQS"
          /besthit="qcoverage 100 , hcoverage 100 , similarity 100
, identity 100 , evalue 8.70e-93 , alnlength 142 ,
Bacteria , Proteobacteria , WP_007550873.1 MULTISPECIES:
50S ribosomal protein L17 [Wolbachia]"
gene      complement(6886..7953)
          /locus_tag="wEsol_00748"
CDS       complement(6886..7953)
          /locus_tag="wEsol_00748"
          /codon_start=1
          /transl_table=11
          /fullproduct="qcoverage 100 , hcoverage 100 , similarity
100 , identity 99.7 , evalue 2.49e-250 , alnlength 355 ,
Bacteria , Proteobacteria , WP_012673178.1 MULTISPECIES:
DNA-directed RNA polymerase subunit alpha [Wolbachia]"
          /cog="RpoA COG0202 317 DNA-directed RNA polymerase, alpha
subunit/40 kD subunit"
          /pfam="RNA_pol_L RNA_pol_A_bac RNA_pol_A_CTD
Pfam-B_14457"

```

```

/tigr="TIGR02027 rpoA 298 DNA-directed RNA polymerase,
alpha subunit"
/product="DNA-directed RNA
polymerase subunit alpha"
/translation="MYYNNDVSLCSNLDKLIKPSVVKVISDDSSSEKSDIVLEPLESGF
ALT LGNALRRV MLSSLKGS AVYGIKIEGVTHEFTSIQGVREDVTDIVLNMGMLRCKLN
GASNKCLNLNAKGPCQVLGMIETDDQCSIVNKDLLICTLGQNVELNMTIYVASGKGY
LPVTKYKENELLKLMSEQDLIGFIPVNALYSPVNRVSYRVENS RVGQVTDKDKLILSI
ETDGTISPSQAVDSAARILQEQLQPFISSDVS YKKSQVSSSSGAKDLGYDPILLRKVD
EMELSVRSHNCLKNENITYIGDLVQKTEGEMLR TANFGRKSLNEIKAVLTNFGLSLGM
NVLNWPPKDIDELAKQHTDED"
/besthit="qcoverage 100 , hcoverage 100 , similarity 100
, identity 99.7 , evalue 2.49e-250 , alnlength 355 ,
Bacteria , Proteobacteria , WP_012673178.1 MULTISPECIES:
DNA-directed RNA polymerase subunit alpha [Wolbachia]"
gene complement(7975..8361)
/locus_tag="wEsol_00749"
CDS complement(7975..8361)
/locus_tag="wEsol_00749"
/codon_start=1
/transl_table=11
/fullproduct="qcoverage 100 , hcoverage 100 , similarity
100 , identity 100 , evalue 2.41e-81 , alnlength 128 ,
Bacteria , Proteobacteria , WP_015589137.1 MULTISPECIES:
30S ribosomal protein S11 [Wolbachia]"
/cog="RpsK COG0100 129 Ribosomal protein S11"
/pfam="Ribosomal_S11"
/tigr="TIGR03632 bact_S11 117 30S ribosomal protein S11"
/product="30S ribosomal
protein S11"
/translation="MKKVKTVSKSKKEFITGVVHIRATFNNTFVNVTDVHGNTLCQTS
VGACGFSGRKSTPYAAGKAAESA AKNAMERFGMKVSVIIRGPGFGTEAAVKALQSC
GLTVTSIADKTAIPHNGCRLRKKRRV"
/besthit="qcoverage 100 , hcoverage 100 , similarity 100
, identity 100 , evalue 2.41e-81 , alnlength 128 ,
Bacteria , Proteobacteria , WP_015589137.1 MULTISPECIES:
30S ribosomal protein S11 [Wolbachia]"
gene complement(8386..8754)
/locus_tag="wEsol_00750"
CDS complement(8386..8754)
/locus_tag="wEsol_00750"
/codon_start=1
/transl_table=11
/fullproduct="qcoverage 100 , hcoverage 100 , similarity
100 , identity 100 , evalue 2.56e-80 , alnlength 122 ,
Bacteria , Proteobacteria , WP_010962745.1 MULTISPECIES:
30S ribosomal protein S13 [Wolbachia]"
/cog="RpsM COG0099 121 Ribosomal protein S13"
/pfam="Ribosomal_S13 FbpA"
/tigr="TIGR03631 bact_S13 113 30S ribosomal protein S13"
/product="30S ribosomal
protein S13"
/translation="MARIAGINIPVRKCVPFALTYIYGIGIATANVICHACEVDKRKR
VSELRDEDIEKISGFIRQNYVIEGELRKEVAMNIKSLVEMGCYRGVRHRKGLPVRGQR
THTNAKTRKGRSRLPIAGKK"
/besthit="qcoverage 100 , hcoverage 100 , similarity 100
, identity 100 , evalue 2.56e-80 , alnlength 122 ,
Bacteria , Proteobacteria , WP_010962745.1 MULTISPECIES:
30S ribosomal protein S13 [Wolbachia]"
gene complement(8814..9455)

```

|      |                                                                                                                                                                                                                                                                                                                                                                                                                                                                                                                                                                                                                                                                                                                                                                                                                                                                                                                                                                                                                                                                                                                                                                                                                                                  |
|------|--------------------------------------------------------------------------------------------------------------------------------------------------------------------------------------------------------------------------------------------------------------------------------------------------------------------------------------------------------------------------------------------------------------------------------------------------------------------------------------------------------------------------------------------------------------------------------------------------------------------------------------------------------------------------------------------------------------------------------------------------------------------------------------------------------------------------------------------------------------------------------------------------------------------------------------------------------------------------------------------------------------------------------------------------------------------------------------------------------------------------------------------------------------------------------------------------------------------------------------------------|
| CDS  | <pre> /locus_tag="wEsol_00751" complement(8814..9455) /locus_tag="wEsol_00751" /codon_start=1 /transl_table=11 /fullproduct="qcoverage 100 , hcoverage 100 , similarity 100 , identity 100 , evalue 5.93e-146 , alnlength 213 , Bacteria , Proteobacteria , WP_007550178.1 MULTISPECIES: nucleoside monophosphate kinase [Wolbachia]" /cog="Adk COG0563 178 Adenylate kinase and related kinases" /pfam="Pfam-B_5968 AAA_17 AAA_18 ADK Spt4" /tigr="TIGR01351 adk 212 adenylate kinase" /product="nucleoside monophosphate kinase" /translation="MIITIFGPPGSGKGTQSSLLIAKYNLKLISVGDLLRNIISSE LGKKIKGTVESGNLIQDEIICGLLRDQLALVDDNCLLDGFPRLNQAHFLTQVLQEKY NRDVDIVVELQLDDNIAIDRLKNRLACLDCSKIYSVSSFSTTCAKCKSTRLEKRIDD ADMSAINKRRISEYHLQMKGLREYYKGKLLTIDANLSVDEVTQEIESKISCNLV" /besthit="qcoverage 100 , hcoverage 100 , similarity 100 , identity 100 , evalue 5.93e-146 , alnlength 213 , Bacteria , Proteobacteria , WP_007550178.1 MULTISPECIES: nucleoside monophosphate kinase [Wolbachia]" </pre>                                                                                                                                                                                                                                                |
| gene | <pre> complement(9452..10780) /locus_tag="wEsol_00752" </pre>                                                                                                                                                                                                                                                                                                                                                                                                                                                                                                                                                                                                                                                                                                                                                                                                                                                                                                                                                                                                                                                                                                                                                                                    |
| CDS  | <pre> complement(9452..10780) /locus_tag="wEsol_00752" /codon_start=1 /transl_table=11 /fullproduct="qcoverage 100 , hcoverage 100 , similarity 99.8 , identity 99.8 , evalue 7.84e-298 , alnlength 442 , Bacteria , Proteobacteria , WP_010962747.1 MULTISPECIES: preprotein translocase subunit SecY [Wolbachia]" /cog="SecY COG0201 436 Preprotein translocase subunit SecY" /pfam="Pfam-B_13180 SecY" /tigr="TIGR00967 3a0501s007 414 preprotein translocase, SecY subunit" /product="preprotein translocase subunit SecY" /translation="MGNKSAFNSLDLTLLYKGDLLKRIFFTLIALICYRLGTYVPIPG INLDVINDIFPKDGSVFGVFNLFSSGGALARMITILALNVMPYIMASIIQLLSSAIKG MKEVKNDGESGRKMNYSYIRYLITIVICVFQSIPILVGLEGMNREGVLVVEIPGVMFRT IGVFSLLGGTMILLIWLGERISASGIGNGISLIIFTGIISELHSALSSLLTLNKNGSVS LFIILFVLVLFLLLLLVIFVESSYRKVIVQHPKKQFKRLHNDFFTYPILKINLSGVV PTIFANAILLTPISIANFYKGHAFSDFILNYFMANKVVYIVAYLVLVIVFFNFFYTTFI FNPEENADFLKKNGGFIPGRRPGKHTSDYLQDIVFKLTFIGSAYLVVICTVPEVMRY YDIPFIFGGTSLIIIVNVITDTIMQIQSYIFSNRYDNWIKKYESKTRKVR" /besthit="qcoverage 100 , hcoverage 100 , similarity 99.8 , identity 99.8 , evalue 7.84e-298 , alnlength 442 , Bacteria , Proteobacteria , WP_010962747.1 MULTISPECIES: preprotein translocase subunit SecY [Wolbachia]" </pre> |
| gene | <pre> complement(10784..11254) /locus_tag="wEsol_00753" </pre>                                                                                                                                                                                                                                                                                                                                                                                                                                                                                                                                                                                                                                                                                                                                                                                                                                                                                                                                                                                                                                                                                                                                                                                   |
| CDS  | <pre> complement(10784..11254) /locus_tag="wEsol_00753" /codon_start=1 /transl_table=11 /fullproduct="qcoverage 100 , hcoverage 100 , similarity 100 , identity 100 , evalue 1.45e-100 , alnlength 156 , </pre>                                                                                                                                                                                                                                                                                                                                                                                                                                                                                                                                                                                                                                                                                                                                                                                                                                                                                                                                                                                                                                  |

Bacteria , Proteobacteria , WP\_141456930.1 MULTISPECIES:  
 50S ribosomal protein L15 [unclassified Wolbachia]"  
 /cog="RplO COG0200 152 Ribosomal protein L15"  
 /pfam="Ribosomal\_L18e"  
 /tigr="TIGR01071 rplO\_bact 144 ribosomal protein L15"  
 /product="50S ribosomal  
 protein L15"  
 /translation="MNAVKLNSIFTKLSKKKKPKLLGRGIGCGKGKTSGRGHKGQKA  
 RSGVSINGFEGGQQSIYTRLPKRGFKPIRRSIYSIINVGDIIQRLMEAKKIVKDSVIDK  
 ERLYKLGFISIKDKIKLLNKGKLSEKFVFHVDFASEAAKKSVASVCGSVEILS"  
 /besthit="qcoverage 100 , hcoverage 100 , similarity 100  
 , identity 100 , evalue 1.45e-100 , alnlength 156 ,  
 Bacteria , Proteobacteria , WP\_141456930.1 MULTISPECIES:  
 50S ribosomal protein L15 [unclassified Wolbachia]"  
 complement(11258..11770)  
 /locus\_tag="wEsol\_00754"  
 CDS complement(11258..11770)  
 /locus\_tag="wEsol\_00754"  
 /codon\_start=1  
 /transl\_table=11  
 /fullproduct="qcoverage 100 , hcoverage 100 , similarity  
 100 , identity 100 , evalue 1.52e-111 , alnlength 170 ,  
 Bacteria , Proteobacteria , WP\_010962748.1 MULTISPECIES:  
 30S ribosomal protein S5 [Wolbachia]"  
 /cog="RpsE COG0098 181 Ribosomal protein S5"  
 /pfam="Ribosomal\_S5 Ribosomal\_S5\_C"  
 /tigr="TIGR01021 rpsE\_bact 156 ribosomal protein S5"  
 /product="30S ribosomal  
 protein S5"  
 /translation="MAIKNLQNNNDLSELLVSVRRVTTVTKGRRFSFSILVVVGDEK  
 GRVCGIGKHAEEARVKAVNAAKKSMIRVYLREGRTLHHDIAKFCSGEIVLRTAR  
 AGTGIIAGGAIRSVFEVLGIKDVVAKSTRSNNPHNVICAVFKAFFDSMLSPRQVASKRG  
 KKISEIVGNR"  
 /besthit="qcoverage 100 , hcoverage 100 , similarity 100  
 , identity 100 , evalue 1.52e-111 , alnlength 170 ,  
 Bacteria , Proteobacteria , WP\_010962748.1 MULTISPECIES:  
 30S ribosomal protein S5 [Wolbachia]"  
 complement(11783..12154)  
 /locus\_tag="wEsol\_00755"  
 gene complement(11783..12154)  
 CDS /locus\_tag="wEsol\_00755"  
 /codon\_start=1  
 /transl\_table=11  
 /fullproduct="qcoverage 100 , hcoverage 100 , similarity  
 100 , identity 100 , evalue 1.26e-76 , alnlength 123 ,  
 Bacteria , Proteobacteria , WP\_006279867.1 MULTISPECIES:  
 50S ribosomal protein L18 [Wolbachia]"  
 /cog="RplR COG0256 125 Ribosomal protein L18"  
 /pfam="Ribosomal\_L18p"  
 /tigr="TIGR00060 L18\_bact 114 ribosomal protein L18"  
 /product="50S ribosomal  
 protein L18"  
 /translation="MKRSYNFLSNSEKRLNRKLDKSAERLRISIFKSNRHFYVQL  
 INDVKGITLTSASTLDAKIDVCKGKVNAETIKQVSSLMVERLSGMKLEQQLTFFDRGA  
 YKYTGGLVSQFAEALRSSGFEF"  
 /besthit="qcoverage 100 , hcoverage 100 , similarity 100  
 , identity 100 , evalue 1.26e-76 , alnlength 123 ,  
 Bacteria , Proteobacteria , WP\_006279867.1 MULTISPECIES:  
 50S ribosomal protein L18 [Wolbachia]"  
 complement(12160..12705)  
 gene

```

CDS      /locus_tag="wEsol_00756"
         complement(12160..12705)
         /locus_tag="wEsol_00756"
         /codon_start=1
         /transl_table=11
         /fullproduct="qcoverage 100 , hcoverage 100 , similarity
100 , identity 100 , evalue 1.90e-124 , alnlength 181 ,
Bacteria , Proteobacteria , WP_007551152.1 MULTISPECIES:
50S ribosomal protein L6 [Wolbachia]"
         /cog="RplF COG0097 178 Ribosomal protein L6P/L9E"
         /pfam="Ribosomal_L6 Ribosomal_L6"
         /tigr="TIGR03654 L6_bact 175 ribosomal protein L6"
         /product="50S ribosomal
protein L6"
         /translation="MSRIGAAPINIPAGVSVEYNNGSMLIKSAKAEKEVSLIRDVVCQ
IIDNQLLLSVDQDKDNYDKIKPMWGTYSNINNIINGMVDGFSVNLEINGVGYKAECD
GKYLTLYLGYSHNVKYKVPKDVEIKCIKPTHLVVSMDKQKVYMVASDICKIRKYDPY
KGKGVVIKGFMLRKVVSXXX"
         /besthit="qcoverage 100 , hcoverage 100 , similarity 100
, identity 100 , evalue 1.90e-124 , alnlength 181 ,
Bacteria , Proteobacteria , WP_007551152.1 MULTISPECIES:
50S ribosomal protein L6 [Wolbachia]"
gene     complement(12722..13117)
CDS      /locus_tag="wEsol_00757"
         complement(12722..13117)
         /locus_tag="wEsol_00757"
         /codon_start=1
         /transl_table=11
         /fullproduct="qcoverage 100 , hcoverage 100 , similarity
100 , identity 100 , evalue 1.18e-87 , alnlength 131 ,
Bacteria , Proteobacteria , WP_007551150.1 MULTISPECIES:
30S ribosomal protein S8 [Wolbachia]"
         /cog="RpsH COG0096 132 Ribosomal protein S8"
         /pfam="Ribosomal_S8"
         /product="30S ribosomal
protein S8"
         /translation="MALSDSIGDFLTRIRNAQLAMHRATRVLF SKMNSSILEILKEEG
YILDYEQVVDNLPSFIVKLKYYEKSPVISDIVRVSKPGCRRYSKYKDISKAYNGLGI
FIISTPKGVMTDYNHKLKVGGEVLCRVF"
         /besthit="qcoverage 100 , hcoverage 100 , similarity 100
, identity 100 , evalue 1.18e-87 , alnlength 131 ,
Bacteria , Proteobacteria , WP_007551150.1 MULTISPECIES:
30S ribosomal protein S8 [Wolbachia]"
gene     complement(13139..13447)
CDS      /locus_tag="wEsol_00758"
         complement(13139..13447)
         /locus_tag="wEsol_00758"
         /codon_start=1
         /transl_table=11
         /pfam="SpoIIIAH Ribosomal_S14"
         /fullproduct="qcoverage 100 , hcoverage 100 , similarity
100 , identity 100 , evalue 2.50e-64 , alnlength 102 ,
Bacteria , Proteobacteria , WP_006279345.1 MULTISPECIES:
30S ribosomal protein S14 [Wolbachia]"
         /translation="MAKKSMIERNLRRIKLCQYKEKREKLKSIINNKNLSIVERFTA
QNKLIIKKLPRNSSKTKIRNRCALTGRPRGVYRKFGLCRIVLRDLCSFGQIPGVTKSSW
"
         /product="30S ribosomal
protein S14"
         /besthit="qcoverage 100 , hcoverage 100 , similarity 100

```

```

, identity 100 , evaluate 2.50e-64 , alnlength 102 ,
Bacteria , Proteobacteria , WP_006279345.1 MULTISPECIES:
30S ribosomal protein S14 [Wolbachia]"
gene complement(13464..13997)
/locus_tag="wEsol_00759"
CDS complement(13464..13997)
/locus_tag="wEsol_00759"
/codon_start=1
/transl_table=11
/fullproduct="qcoverage 100 , hcoverage 100 , similarity
100 , identity 100 , evaluate 2.23e-121 , alnlength 177 ,
Bacteria;Eukaryota , Proteobacteria;Arthropoda ,
WP_010962750.1 MULTISPECIES: 50S ribosomal protein L5
[Wolbachia]"
/cog="RplE COG0094 180 Ribosomal protein L5"
/pfam="Ribosomal_L5 Ribosomal_L5_C"
/product="50S ribosomal
protein L5"
/translation="MFKELYKDSIVKSLKDKFNYGNIMQVPKLVKVCINMGVGDAATD
SKAINEPLDSLYLIAGQKPLSTFAKKSISGFKIRKGATVGCKVTLLRRDKMYEFLERLI
YIALPREKDFRGFSVKQFDGNGNFSFGIKEHISFLEIDYDKISKIRGMDINIITSavs
DKEAKELLLALKFPFFD"
/besthit="qcoverage 100 , hcoverage 100 , similarity 100
, identity 100 , evaluate 2.23e-121 , alnlength 177 ,
Bacteria;Eukaryota , Proteobacteria;Arthropoda ,
WP_010962750.1 MULTISPECIES: 50S ribosomal protein L5
[Wolbachia]"
gene complement(14004..14321)
/locus_tag="wEsol_00760"
CDS complement(14004..14321)
/locus_tag="wEsol_00760"
/codon_start=1
/transl_table=11
/fullproduct="qcoverage 100 , hcoverage 100 , similarity
100 , identity 100 , evaluate 1.08e-64 , alnlength 105 ,
Bacteria;Eukaryota , Proteobacteria;Arthropoda ,
WP_006279347.1 MULTISPECIES: 50S ribosomal protein L24
[Wolbachia]"
/cog="RplX COG0198 104 Ribosomal protein L24"
/pfam="KOW Pfam-B_10078"
/tigr="TIGR01079 rplX_bact 104 ribosomal protein L24"
/product="50S ribosomal
protein L24"
/translation="MSAKIKSGDDVIVLTGKDKGKIGKVIKVIARDAKKKVIVSGVNV
HKRH TKPKAGSSGGILNKE LAIDISNVATLDPKYKTPTRVGFKVIDGRKVRFAKVSGE
VID"
/besthit="qcoverage 100 , hcoverage 100 , similarity 100
, identity 100 , evaluate 1.08e-64 , alnlength 105 ,
Bacteria;Eukaryota , Proteobacteria;Arthropoda ,
WP_006279347.1 MULTISPECIES: 50S ribosomal protein L24
[Wolbachia]"
gene complement(14321..14680)
/locus_tag="wEsol_00761"
CDS complement(14321..14680)
/locus_tag="wEsol_00761"
/codon_start=1
/transl_table=11
/fullproduct="qcoverage 100 , hcoverage 100 , similarity
100 , identity 100 , evaluate 1.06e-73 , alnlength 119 ,
Bacteria;Eukaryota , Proteobacteria;Arthropoda ,

```

```

WP_006279348.1 MULTISPECIES: 50S ribosomal protein L14
[Wolbachia]"
/cog="RplN COG0093 122 Ribosomal protein L14"
/pfam="Ribosomal_L14"
/tigr="TIGR01067_rplN_bact 122 ribosomal protein L14"
/product="50S ribosomal
protein L14"
/translation="MIQKNTLLEVADNSGARAVLCIGLLGGRKSASIGDTVIVSTKSI
TPRGKVEKGKVYRAVVVRVKSPIRKSDGSVIRFSSNAVVLINDQGEPLGTRVFGPVKK
LSSGSFMKIMSLAVEVL"
/besthit="qcoverage 100 , hcoverage 100 , similarity 100
, identity 100 , eval 1.06e-73 , alnlength 119 ,
Bacteria;Eukaryota , Proteobacteria;Arthropoda ,
WP_006279348.1 MULTISPECIES: 50S ribosomal protein L14
[Wolbachia]"
gene complement(14694..14930)
/locus_tag="wEsol_00762"
CDS complement(14694..14930)
/locus_tag="wEsol_00762"
/codon_start=1
/transl_table=11
/fullproduct="qcoverage 100 , hcoverage 100 , similarity
100 , identity 100 , eval 1.62e-49 , alnlength 78 ,
Bacteria , Proteobacteria , WP_007549925.1 MULTISPECIES:
30S ribosomal protein S17 [Wolbachia]"
/cog="RpsQ COG0186 87 Ribosomal protein S17"
/pfam="Pfam-B_14863 Ribosomal_S17"
/tigr="TIGR03635_S17_bact 72 30S ribosomal protein S17"
/product="30S ribosomal
protein S17"
/translation="MPKKVFCGTVTKAKCDKTVKVSVLQVYKDELYKKVIKKYKKYTA
HDENNSCKEGDKVLIQEHKPISTTKKWVIVNSSH"
/besthit="qcoverage 100 , hcoverage 100 , similarity 100
, identity 100 , eval 1.62e-49 , alnlength 78 ,
Bacteria , Proteobacteria , WP_007549925.1 MULTISPECIES:
30S ribosomal protein S17 [Wolbachia]"
gene complement(14923..15126)
/locus_tag="wEsol_00763"
CDS complement(14923..15126)
/locus_tag="wEsol_00763"
/codon_start=1
/transl_table=11
/fullproduct="qcoverage 100 , hcoverage 100 , similarity
100 , identity 100 , eval 4.07e-36 , alnlength 67 ,
Bacteria , Proteobacteria , WP_006279350.1 MULTISPECIES:
50S ribosomal protein L29 [Wolbachia]"
/cog="RpmC COG0255 69 Ribosomal protein L29"
/pfam="Ribosomal_L29"
/tigr="TIGR00012_L29_56 ribosomal protein L29"
/product="50S ribosomal
protein L29"
/translation="MDIADIESRSSQELHEILVNLNRKEFVNLFQKKLGQCNNISRFS
LIRKSIARILTTLNKRRREEKNA"
/besthit="qcoverage 100 , hcoverage 100 , similarity 100
, identity 100 , eval 4.07e-36 , alnlength 67 ,
Bacteria , Proteobacteria , WP_006279350.1 MULTISPECIES:
50S ribosomal protein L29 [Wolbachia]"
gene complement(15138..15551)
/locus_tag="wEsol_00764"
CDS complement(15138..15551)

```

```

/locus_tag="wEsol_00764"
/codon_start=1
/transl_table=11
/fullproduct="qcoverage 100 , hcoverage 100 , similarity
100 , identity 100 , evalue 1.71e-92 , alnlength 137 ,
Bacteria;Eukaryota , Proteobacteria;Arthropoda ,
WP_010962752.1 MULTISPECIES: 50S ribosomal protein L16
[Wolbachia]"
/cog="RplP COG0197 146 Ribosomal protein L16/L10E"
/pfam="Ribosomal_L16"
/tigr="TIGR01164 rplP_bact 126 ribosomal protein L16"
/product="50S ribosomal
protein L16"
/translation="MFIPKKSKYKKVFKGRIKNTKGGSTLSFGDYGLKAMEAGRIQS
KHIETARRVISRTLKRSQVWIRIFPDTPVSKKPADVRMGKGKGSVEFWVFKAKPGRM
LFEISSDVPMLARLALALEKATAKLPKCKFVSNHN"
/besthit="qcoverage 100 , hcoverage 100 , similarity 100
, identity 100 , evalue 1.71e-92 , alnlength 137 ,
Bacteria;Eukaryota , Proteobacteria;Arthropoda ,
WP_010962752.1 MULTISPECIES: 50S ribosomal protein L16
[Wolbachia]"
gene complement(15566..16180)
/locus_tag="wEsol_00765"
CDS complement(15566..16180)
/locus_tag="wEsol_00765"
/codon_start=1
/transl_table=11
/fullproduct="qcoverage 100 , hcoverage 100 , similarity
100 , identity 100 , evalue 5.31e-140 , alnlength 204 ,
Bacteria;Eukaryota , Proteobacteria;Arthropoda ,
WP_010962753.1 MULTISPECIES: 30S ribosomal protein S3
[Wolbachia]"
/cog="RpsC COG0092 233 Ribosomal protein S3"
/pfam="KH_2 Ribosomal_S3_C"
/tigr="TIGR01009 rpsC_bact 212 ribosomal protein S3"
/product="30S ribosomal
protein S3"
/translation="MGNVNPKGFRLLKIINTWSSIWYAEKGYKQGLHQDLIRSINIES
FKHAGVSKVIERITDLVSVIIHSSRPGVIIGKKGSDIEKIKQKIAEKVKNNVEVNVV
GVKRSEIDAVLISNSIAQQLEKRVSFRRAMKKAIQSCLRMGARGIKVSCSGRLGGAIE
ARTEWYKEGRLPLHTLRANIDYAFAEAKTIYGIIGVKVWVYIGN"
/besthit="qcoverage 100 , hcoverage 100 , similarity 100
, identity 100 , evalue 5.31e-140 , alnlength 204 ,
Bacteria;Eukaryota , Proteobacteria;Arthropoda ,
WP_010962753.1 MULTISPECIES: 30S ribosomal protein S3
[Wolbachia]"
gene complement(16220..16567)
/locus_tag="wEsol_00766"
CDS complement(16220..16567)
/locus_tag="wEsol_00766"
/codon_start=1
/transl_table=11
/fullproduct="qcoverage 100 , hcoverage 100 , similarity
100 , identity 100 , evalue 1.53e-71 , alnlength 115 ,
Bacteria;Eukaryota , Proteobacteria;Arthropoda ,
WP_007549821.1 MULTISPECIES: 50S ribosomal protein L22
[Wolbachia]"
/cog="RplV COG0091 120 Ribosomal protein L22"
/pfam="Ribosomal_L22"
/tigr="TIGR01044 rplV_bact 103 ribosomal protein L22"

```

```

/product="50S ribosomal
protein L22"
/translation="MKNRDVIVKAGSRVLKSTPRKLNLVAGLVRNKKVSFATVQLRFC
EKKAAGLIRKVLNSAIAANAQNYGLDIDNLYIKEILIGKSLTLRRVCPKAMGRANRVSK
RYSNITVKLGEII"
/besthit="qcoverage 100 , hcoverage 100 , similarity 100
, identity 100 , evalue 1.53e-71 , alnlength 115 ,
Bacteria;Eukaryota , Proteobacteria;Arthropoda ,
WP_007549821.1 MULTISPECIES: 50S ribosomal protein L22
[Wolbachia]"
gene complement(16573..16857)
/locus_tag="wEsol_00767"
CDS complement(16573..16857)
/locus_tag="wEsol_00767"
/codon_start=1
/transl_table=11
/fullproduct="qcoverage 100 , hcoverage 100 , similarity
100 , identity 100 , evalue 3.99e-64 , alnlength 94 ,
Bacteria , Proteobacteria , WP_006279181.1 MULTISPECIES:
30S ribosomal protein S19 [Wolbachia]"
/cog="RpsS COG0185 93 Ribosomal protein S19"
/pfam="Ribosomal_S19"
/tigr="TIGR01050 rpsS_bact 92 ribosomal protein S19"
/product="30S ribosomal
protein S19"
/translation="MSRSAWKPPFCHPSILKSVNNALNKG FVNMAIKVHSRASVILPN
CLGLKFAVYNGKDYIPVNVNDQNMIGHKGFGEFSPTRKFTGHSGDKKATTR"
/besthit="qcoverage 100 , hcoverage 100 , similarity 100
, identity 100 , evalue 3.99e-64 , alnlength 94 ,
Bacteria , Proteobacteria , WP_006279181.1 MULTISPECIES:
30S ribosomal protein S19 [Wolbachia]"
gene complement(16861..17685)
/locus_tag="wEsol_00768"
CDS complement(16861..17685)
/locus_tag="wEsol_00768"
/codon_start=1
/transl_table=11
/fullproduct="qcoverage 100 , hcoverage 100 , similarity
100 , identity 100 , evalue 9.52e-196 , alnlength 274 ,
Bacteria , Proteobacteria , WP_015589143.1 MULTISPECIES:
50S ribosomal protein L2 [Wolbachia]"
/cog="RplB COG0090 275 Ribosomal protein L2"
/pfam="Ribosomal_L2 Ribosomal_L2_C"
/tigr="TIGR01171 rplB_bact 275 ribosomal protein L2"
/product="50S ribosomal
protein L2"
/translation="MGMKFFNPVTPSSRGTVLVSKVGLSKDEPEKSLTSGKKSSGGRN
NHGRITTRHRGGGHHKKYRVIDFKRNRSGQGIVEKIEYDPNRSGFLALISYKEDDIKS
YILAPQGMKPGDVVTAGNDADILPGNCLLLKHIPVGSFVHNVELKPGNGAAIARAAGC
YAQIVGRDGQYVLLRLRSGQIRLILSSCKATIGVVSNPDKNRKLGKAGRSRWLGIRP
TVRGVAMNPVDHPHGGGEGKTSGGRHPVTPWGVATKGKKTRRRNKSSDKYIKQLKG"
/besthit="qcoverage 100 , hcoverage 100 , similarity 100
, identity 100 , evalue 9.52e-196 , alnlength 274 ,
Bacteria , Proteobacteria , WP_015589143.1 MULTISPECIES:
50S ribosomal protein L2 [Wolbachia]"
gene complement(17687..17974)
/locus_tag="wEsol_00769"
CDS complement(17687..17974)
/locus_tag="wEsol_00769"
/codon_start=1

```

```

/translation=11
/fullproduct="qcoverage 100 , hcoverage 100 , similarity
100 , identity 100 , evaluate 1.90e-58 , alnlength 95 ,
Bacteria , Proteobacteria , WP_015589144.1 MULTISPECIES:
50S ribosomal protein L23 [Wolbachia]"
/cog="RplW COG0089 94 Ribosomal protein L23"
/pfam="Ribosomal_L23"
/product="50S ribosomal
protein L23"
/translation="MIKYNNIIKSPIITEKASFLREKFNKYSLYVFNVNKRQIKLAI
ESLFDVKISSINVRIKPKYRRFRGVIGCEKQKKKVYFSLMDGQKLDIMSV"
/besthit="qcoverage 100 , hcoverage 100 , similarity 100
, identity 100 , evaluate 1.90e-58 , alnlength 95 ,
Bacteria , Proteobacteria , WP_015589144.1 MULTISPECIES:
50S ribosomal protein L23 [Wolbachia]"
gene complement(17971..18585)
/locus_tag="wEsol_00770"
CDS complement(17971..18585)
/locus_tag="wEsol_00770"
/codon_start=1
/translation=11
/fullproduct="qcoverage 100 , hcoverage 100 , similarity
100 , identity 100 , evaluate 2.35e-143 , alnlength 204 ,
Bacteria , Proteobacteria , WP_015589145.1 MULTISPECIES:
50S ribosomal protein L4 [unclassified Wolbachia]"
/cog="RplD COG0088 214 Ribosomal protein L4"
/pfam="Ribosomal_L4"
/tigr="TIGR03953 rplD_bact 188 50S ribosomal protein L4"
/product="50S ribosomal
protein L4"
/translation="MECNLVNLSNDNVGTAQLNPLIFSAKQKLSILHDIVRWQLAKRR
AGTHKTKGISDVSGTTAKPYDQKRTGRARQGSRLSPQFRGGGIIIFGPVVRSHYSLNK
KVRKFGLKIALSLKYLNQVIILNLDNLNIDVKKTSEMCKCIKNFKFSSFLIVGDYGGDL
LRAAKNLHYVDLIKPIGLNVFDIILNHECVMLTKDTLKHLEGRLL"
/besthit="qcoverage 100 , hcoverage 100 , similarity 100
, identity 100 , evaluate 2.35e-143 , alnlength 204 ,
Bacteria , Proteobacteria , WP_015589145.1 MULTISPECIES:
50S ribosomal protein L4 [unclassified Wolbachia]"
gene complement(18588..19310)
/locus_tag="wEsol_00771"
CDS complement(18588..19310)
/locus_tag="wEsol_00771"
/codon_start=1
/translation=11
/fullproduct="qcoverage 100 , hcoverage 100 , similarity
100 , identity 100 , evaluate 4.68e-170 , alnlength 240 ,
Bacteria , Proteobacteria , WP_006279218.1 MULTISPECIES:
50S ribosomal protein L3 [Wolbachia]"
/cog="RplC COG0087 218 Ribosomal protein L3"
/pfam="Ribosomal_L3"
/tigr="TIGR03625 L3_bact 202 50S ribosomal protein L3"
/product="50S ribosomal
protein L3"
/translation="MKRINSLRRIGLLMMNIGHTAMYSNDRMAVTLLHLSETYIIDI
KGQDKCGYNSVILGTGDFKNIAKPQLEYLKKKGINNKCKLYESRLNDLSGIECGKKVG
INHFVVGQYLDITGYSIGKGFAGVMKRHNFSGLRASHGVSIAHRSQGSGTQCQDPGRV
FKGKKMAGHLGNSRITAQNMKILSIDHENSIIAVKGNNVPGFKNSYVFVRDAVKKSLH
KDVFPFVGLLLDVNDASNLVS"
/besthit="qcoverage 100 , hcoverage 100 , similarity 100
, identity 100 , evaluate 4.68e-170 , alnlength 240 ,

```

```

Bacteria , Proteobacteria , WP_006279218.1 MULTISPECIES:
50S ribosomal protein L3 [Wolbachia]"
gene complement(19320..19640)
/locus_tag="wEsol_00772"
CDS complement(19320..19640)
/locus_tag="wEsol_00772"
/codon_start=1
/transl_table=11
/fullproduct="qcoverage 100 , hcoverage 100 , similarity
100 , identity 100 , evalue 7.02e-66 , alnlength 106 ,
Bacteria;Eukaryota , Proteobacteria;Arthropoda ,
WP_012673184.1 MULTISPECIES: 30S ribosomal protein S10
[Wolbachia]"
/cog="RpsJ COG0051 104 Ribosomal protein S10"
/pfam="Ribosomal_S10"
/tigr="TIGR01049 rpsJ_bact 99 ribosomal protein S10"
/product="30S ribosomal
protein S10"
/translation="MKQDIYINIKAFDCSLLEECVRKFVDELKRSSAKLSGPIALPRK
DSKFIVNRSPHVDKKSREQFEMRTSRRLIVLHDLTPTMMQMLTGLSFSAGVEVDLKVK
EVKV"
/besthit="qcoverage 100 , hcoverage 100 , similarity 100
, identity 100 , evalue 7.02e-66 , alnlength 106 ,
Bacteria;Eukaryota , Proteobacteria;Arthropoda ,
WP_012673184.1 MULTISPECIES: 30S ribosomal protein S10
[Wolbachia]"
gene complement(19655..20827)
/locus_tag="wEsol_00773"
CDS complement(19655..20827)
/locus_tag="wEsol_00773"
/codon_start=1
/transl_table=11
/fullproduct="qcoverage 100 , hcoverage 100 , similarity
100 , identity 99.7 , evalue 1.77e-279 , alnlength 390 ,
Bacteria , Proteobacteria , WP_141456826.1 elongation
factor Tu [Wolbachia endosymbiont of Carposina sasakii]"
/cog="TufB COG0050 394 GTPases - translation elongation
factors"
/pfam="GTP_EFTU MMR_HSR1 Miro GTP_EFTU_D2 GTP_EFTU_D3"
/tigr="TIGR00485 EF-Tu 394 translation elongation factor
Tu"
/product="elongation factor Tu"
/translation="MTAIVEAFGKPHVNVGTIGHVDHGKTTLTAAITKHYGNFVAYDQ
IDKAPEERKRGITIAAHVEYQTEKRHYAHVDCPGHADYVKNMIVGAAQMDAAILVVS
GVDGMPQTREHILLAKQVGVGVIIVVYINKADVADTDMIDLVEMEVRLLSKYGFPDG
EVPVVVGSALKALDDSSSEYGKKSIDKLMEKLDEYVAVPPRPVDLPFLLPIDVFSIS
GRGTVVVTGRIEKGEIKTGEEIEIIGLKATQKTICTGVEMFKLLDKGSAGLNVGILLR
GTKREEVERGQVLAKPGTITPHRKFKAEVYILKKEEGGRHTPFFANYQPQFYLRRTDV
TGSIKLLDGKEMVMPGDNVSVLEVELQVPIAMDKGLRFAIREGGRTVGSVGVSEILE"
/besthit="qcoverage 100 , hcoverage 100 , similarity 100
, identity 99.7 , evalue 1.77e-279 , alnlength 390 ,
Bacteria , Proteobacteria , WP_141456826.1 elongation
factor Tu [Wolbachia endosymbiont of Carposina sasakii]"
gene complement(21178..22269)
/locus_tag="wEsol_00774"
CDS complement(21178..22269)
/locus_tag="wEsol_00774"
/codon_start=1
/transl_table=11
/fullproduct="qcoverage 100 , hcoverage 100 , similarity

```

```

100 , identity 100 , evaluate 6.50e-266 , alnlength 363 ,
Bacteria , Proteobacteria , WP_015589146.1 MULTISPECIES:
glutamine-hydrolyzing carbamoyl-phosphate synthase small
subunit [unclassified Wolbachia]"
/cog="CarA COG0505 368 Carbamoylphosphate synthase small
subunit"
/pfam="CPSase_sm_chain GATase Peptidase_C26"
/tigr="TIGR01368 CPSaseIIsma11 361 carbamoyl-phosphate
synthase, small subunit"
/product="
glutamine-hydrolyzing carbamoyl-phosphate synthase small
subunit"
/translation="MQDAVLILQDGKCFWGKSVGKKGKCIGEVCFITGMTGYQHTITD
PSFADQIITFTFPHIGNVGINHKDNEGKKIFASGVVMRELSSMSHPSSYISLNDWLEK
NNVIGISGVDTRALTRHLREHGSQNGMICSSSKAHALDKLKEYKSVNGIEITNKVSLH
SNFKSDLNAKYRVVIVDFGVKISIVSRLIELGCTVELIRPSTGFAQKVLSMNPDGIVL
SNGPGDPQEIGESVSVSEIDIIKSKIPIFGICMGHQLLAITLGAKTIKMDIGHRGSNH
PVYDVISGKVEITSQNHGFVVDASLLSNVEITHISLFDNSVEGIMMKDYPVFSVQYH
PEEAPGTHDSHYLFKRFIDNIVLYKMKSA"
/besthit="qcoverage 100 , hcoverage 100 , similarity 100
, identity 100 , evaluate 6.50e-266 , alnlength 363 ,
Bacteria , Proteobacteria , WP_015589146.1 MULTISPECIES:
glutamine-hydrolyzing carbamoyl-phosphate synthase small
subunit [unclassified Wolbachia]"
gene 22475..22969
/locus_tag="wEsol_00775"
CDS 22475..22969
/locus_tag="wEsol_00775"
/codon_start=1
/transl_table=11
/pfam="CopD"
/fullproduct="qcoverage 100 , hcoverage 100 , similarity
100 , identity 100 , evaluate 4.38e-99 , alnlength 164 ,
Bacteria , Proteobacteria , WP_015589147.1 MULTISPECIES:
hypothetical protein [unclassified Wolbachia]"
/translation="MNTGTNQSKKINEKWLGGIGALLFVMMLPSILLAKIAIGLIM
VSVAIAIAIKVALKTISNALEDKQADQSQATQQTTSKIINLAIGLTSIFVGGLLLFII
AQGTGLIAACAAITALALHEYVKNQEIGKEINDKFDKVADDTINFIVSSVEKLIPTKPP
GITA"
/product="hypothetical protein"
/besthit="qcoverage 100 , hcoverage 100 , similarity 100
, identity 100 , evaluate 4.38e-99 , alnlength 164 ,
Bacteria , Proteobacteria , WP_015589147.1 MULTISPECIES:
hypothetical protein [unclassified Wolbachia]"
gene complement(23390..24757)
/locus_tag="wEsol_00776"
CDS complement(23390..24757)
/locus_tag="wEsol_00776"
/codon_start=1
/transl_table=11
/fullproduct="qcoverage 100 , hcoverage 100 , similarity
98.9 , identity 98.5 , evaluate 0.0 , alnlength 455 ,
Bacteria , Proteobacteria , WP_155968318.1 MULTISPECIES:
hypothetical protein [Wolbachia]"
/translation="MFSSIVNLLNGFFKNSSTKESEEKLTLLSPQANLQFDETQVQSV
LSDFEELFEKDNKCFDKIADDYEKKGESALFNIVILNKRKEIIDILDRNLPLLEEQEE
FRKKYGQYVLQIDKGMISYKELQDGLRSFEDRAEKVLSDFERLNFDFKDNKCEDSSDS
VNYNNGWPAFPDKIANYYREDDIFLFNYVVLKSRKEIMGILDKKLTSKDQEELKENF
KKRLGRYLIRIGEGMSDGQEFLLKTGSAIAFFDGCYVPCPYANRLNHYDHLNINITKP
EQSLETSRLFTEKTKRMEEKSEVKRAKIYSNGERIVTIEKNEKQQRNYSFTKFAICD

```

```

IEISWGAKDESGKDLNCTVVLNINLGQVSIKKSTIDGKDVEPKKILELAKQNEAVLIK
GKALHEVLAARFIKQTPCEEKKDMQSHENIVVPGSGAPRSINEEITVEHPFGKAANKD
NHREM"
/product="hypothetical protein"
/besthit="qcoverage 100 , hcoverage 100 , similarity 98.9
, identity 98.5 , evalue 0.0 , alnlength 455 , Bacteria ,
Proteobacteria , WP_155968318.1 MULTISPECIES:
hypothetical protein [Wolbachia]"
gene complement(24839..25756)
/locus_tag="wEsol_00777"
CDS complement(24839..25756)
/locus_tag="wEsol_00777"
/codon_start=1
/transl_table=11
/fullproduct="qcoverage 100 , hcoverage 100 , similarity
100 , identity 100 , evalue 2.97e-210 , alnlength 305 ,
Bacteria , Proteobacteria , WP_041573528.1 MULTISPECIES:
class II fructose-bisphosphatase [unclassified
Wolbachia]"
/cog="GlpX COG1494 332
Fructose-1,6-bisphosphatase/sedoheptulose
1,7-bisphosphatase and related proteins"
/pfam="FBPase_glpX"
/tigr="TIGR00330 glpX 334 fructose-1,6-bisphosphatase,
class II"
/product="class II
fructose-bisphosphatase"
/translation="MEDLAYKLVKVTEAAALAAYKLAGFGDEKKADQVAVDAMRTVLN
SMEINGTIVIGEGERDEAPMLYIGEKVGTGNGPEIDIAVDPLEGTTICAHYKPGAMSV
LAATKKGNFLHAPDVYMEKIAVGKNLPEGVVSLKNSIEKNLDNLAKAKCKVNDLVVT
ILNRERHNELIVKIRKLGAIKLIDDGDIVAVVSLVNGNHDMYIGIGGAPEGVLAAAA
LSSIGGQMEGRLIFDQDLKERAKNLNIDDPEKVYAVKDMARGESVFIATGVTSGELV
DGVDNICSTSSLIILPNNLIKLQTMQNLNLC"
/besthit="qcoverage 100 , hcoverage 100 , similarity 100
, identity 100 , evalue 2.97e-210 , alnlength 305 ,
Bacteria , Proteobacteria , WP_041573528.1 MULTISPECIES:
class II fructose-bisphosphatase [unclassified
Wolbachia]"
gene 25883..26593
/locus_tag="wEsol_00778"
CDS 25883..26593
/locus_tag="wEsol_00778"
/codon_start=1
/transl_table=11
/product="hypothetical protein"
/pfam="Ank_2 Ank_5"
/translation="MAYSDDDVRNFYLDIDRITGRDNTVTSLEELKKRLRKEVNFQDE
CEGNSLGNLLKHATENNNPRVKDFLLQNGCEPLQQEQITAAINKEEEAPNVEENRA
DSNEVDSSNFINPGMTAEVLYEQLIQKETNLAIFDSFANAVRESNITGDRGIFLDV
KLFTDLDAVIHLTDASRTILGIATITKQADVVKVLLDSGKFYEEEEKFNALCLAITQD
NAQEAELILGYVSPANRK"
/besthit="qcoverage 100 , hcoverage 53.0337078651685 ,
similarity 100 , identity 100 , evalue 5.58e-158 ,
alnlength 236 , Bacteria , Proteobacteria ,
WP_015589149.1 MULTISPECIES: hypothetical protein
[unclassified Wolbachia]"
gene 26603..27220
/locus_tag="wEsol_00779"
CDS 26603..27220
/locus_tag="wEsol_00779"

```

```

/codon_start=1
/transl_table=11
/pfam="Pfam-B_450"
/fullproduct="qcoverage 100 , hcoverage 94.9074074074074
, similarity 100 , identity 99.5 , evaluate 1.54e-110 ,
alnlength 205 , Bacteria , Proteobacteria ,
WP_197907367.1 hypothetical protein [Wolbachia
endosymbiont of Kradibia gibbosae]"
/translation="MAIQVGKTEIVNAFLNRGKLNEENRAEPSSSNGNIGSRPVATVP
PVSTNGDNRNHDNEIPVVTETNQTTPNSDNVNGQSNHNNKNTKTPVIPEAKQTATPNN
DNKANGFVDAQFSVPNEKEAKYKKSKEFYTSLT KDVVGVVITGLFITAAVMVPFVTG
AVICGVIAALVAIATGLHVKNSTLPSYREMEENKVEHVQKTAKTL"
/product="hypothetical protein"
/besthit="qcoverage 100 , hcoverage 94.9074074074074 ,
similarity 100 , identity 99.5 , evaluate 1.54e-110 ,
alnlength 205 , Bacteria , Proteobacteria ,
WP_197907367.1 hypothetical protein [Wolbachia
endosymbiont of Kradibia gibbosae]"
gene complement(27273..30047)
/locus_tag="wEsol_00780"
CDS complement(27273..30047)
/locus_tag="wEsol_00780"
/codon_start=1
/transl_table=11
/fullproduct="qcoverage 99.6753246753247 , hcoverage 100
, similarity 100 , identity 99.9 , evaluate 0.0 , alnlength
921 , Bacteria , Proteobacteria , QDH18700.1 pyruvate,
phosphate dikinase [Wolbachia endosymbiont of Carposina
sasakii]"
/cog="PpsA COG0574 740 Phosphoenolpyruvate
synthase/pyruvate phosphate dikinase"
/pfam="PPDK_N Pfam-B_16844 PEP-utilizers PEP-utilizers_C"
/tigr="TIGR01828 pyru_phos_dikin 865 pyruvate, phosphate
dikinase"
/product="pyruvate, phosphate dikinase"
/translation="MYNVFISENPEKMMGEKLIHYFSQKCEGNAEMKNLLGGKGANL
AEMCNVGIPVPPGFTISTSACKVYYQDNRSSVIQVSDYSDPEKNVVTHWN DICSGIKN
YMTMLENDIGCKFGDLNNPLLISIRSGSVSSMPGMLDTILNVGLNDET VVGLAKKS GE
RFAYDSYCRFIMMYSNVVLQLDHHLFQDVIDNEQQKSGAKSLADLDVDVLKRIVNDFK
KIVYEKTEKHFPQNVEEQLLSVNAVFA SWKNDRAVS YRKIHNI PENLGTAVNVQAMV
FGNLNDNSATGVIFTRNPSTGEKKLFGEFLVNAQGEDV VSGVYTPMPIDGEQKNTMEK
LLPSVYLELCAVCEKLERHYKDMQDIEFTVQDGKLWILQTRSGKRTAEAAIRIIVDMV
NEG TITKEEGILRIDPKTFDNL LHPVLDVKS DQKVIGKGLPASPGVASGYVVFASDA
EKAAEQGKKVILVRSETSPEDINGMNAASGIVTARGGMTSHA AVVTRGMGKPCICSVS
GLYIDKDGTF FSVGDTKVNKGEPITINGGTGEVMLGILPTISP ELSQEFKTIINWIDE
IKTVKVRANADTPKDAKIAKEFGAEGIGLC RTEHMF FASDRIEFIQKLIMADDENERA
NALIKLEEMQKSDFKEIFSIMEGREVTIRLLDPPLHEFLPNNQSTIEKIAKSLKSVE
SVKNKIAQLSEKNPMLGHRGCRLAISHPEIYSMQIRAILS AASELKKEKKIEVEPEIM
VPFIMNEKEFVLICELVKKESSVISARIKKQIPASRAGMTSDKAYSIGTMIELPRAAL
IADKLAKHAEFFSFGTNDLTQTTMGLSRDDSVNFLDSYKESNIFENDPFEVLDIEGVG
ELIKMAIERGKKTRKEIKLGICGEHGADPKSIEFLIESGVDYVSCSPYRVPVAKLVAA
QFSIKSKCVG"
/besthit="qcoverage 99.6753246753247 , hcoverage 100 ,
similarity 100 , identity 99.9 , evaluate 0.0 , alnlength
921 , Bacteria , Proteobacteria , QDH18700.1 pyruvate,
phosphate dikinase [Wolbachia endosymbiont of Carposina
sasakii]"
gene 30219..31070
/locus_tag="wEsol_00781"
CDS 30219..31070

```

```

/locus_tag="wEsol_00781"
/codon_start=1
/transl_table=11
/fullproduct="qcoverage 100 , hcoverage 100 , similarity
100 , identity 100 , evalue 3.17e-194 , alnlength 283 ,
Bacteria , Proteobacteria , WP_015589151.1 MULTISPECIES:
Rpn family recombination-promoting nuclease/putative
transposase [unclassified Wolbachia]"
/pfam="PDDEXK_2"
/tigr="TIGR01784 T_den_put_tspse 273 conserved
hypothetical protein"
/product="Rpn family
recombination-promoting nuclease/putative transposase"
/translation="MALSKFLDPKNDVAFRRIFGTEKNKDILIHFLNDILGFTGKDEI
KEIEFLSTIQDAEIASKKQSIVDVLCDENGQVQVIVEMQVAKTKGF EKRAQYYAAKAY
SRQADKGDQYQGLKEIIFIAIADCILFPNKSEYKSDHVMLDKDSYEHDLKDFYFTFIE
LPKFPKTKEDQLESIVEKWIYYFKYADETSEEELEKIIGSDVVIKKAYEELNRFNWSE
KEFIAEQEIKRIRDERAVLEQKLD DAKKEGKIEVAKTMLANNVDVTTIVKFTGLSMS
EIKELQN"
/besthit="qcoverage 100 , hcoverage 100 , similarity 100
, identity 100 , evalue 3.17e-194 , alnlength 283 ,
Bacteria , Proteobacteria , WP_015589151.1 MULTISPECIES:
Rpn family recombination-promoting nuclease/putative
transposase [unclassified Wolbachia]"
gene complement(31177..32532)
/locus_tag="wEsol_00782"
CDS complement(31177..32532)
/locus_tag="wEsol_00782"
/codon_start=1
/transl_table=11
/fullproduct="qcoverage 100 , hcoverage 100 , similarity
100 , identity 100 , evalue 0.0 , alnlength 451 ,
Bacteria , Proteobacteria , WP_227738550.1
phosphomannomutase/phosphoglucomutase [Wolbachia
endosymbiont of Drosophila simulans]"
/cog="{ManB} COG1109 464 Phosphomannomutase"
/pfam="PGM_PMM_I PGM_PMM_II PGM_PMM_III PGM_PMM_IV"
/tigr="TIGR03990 Arch_GlmM 444 phosphoglucosamine mutase"
/product="WP_227738550.1
phosphomannomutase/phosphoglucomutase"
/translation="MDNTIIRKYDIRGIVGKDLQINDGYEIGRKFGQTVASVCVGYDS
RIDSPGIERELIRGLT LSGANVIRVGLCSSPMLYAATQITQADLGIIITASHNPSEYN
GFKFFSNKKVFSDQEMKEIISSPIKNSTRIGSLININIYSEYISILKSAVKNNTTQKL
KIAWD CGNSPASGIIRYIEKILPGHTHIVTNN SIDGAFPLHDPDPIEEKNLAQLIDIV
KEYGCDLGIALDGDSDRVLIDNKGNVVSN DHLFIIFAREVLEEYPESKVIANVKMSM
KVHDFVSKLGGQVITCATGHSLVKKKMVEEEAKFAGELSGHFFFSELSFDDGLYSAVK
AVDILLKKNQSLSQVIEDLPKLYITHEVKIVVKDEKKFQIIIESIKKTLEQQNIVFSDL
DGVKVTDNKGWLLRVSN TQNCITARCEGETLEGFELTKKVL FHYIDEARSLNCSYSQ
K"
/besthit="qcoverage 100 , hcoverage 100 , similarity 100
, identity 100 , evalue 0.0 , alnlength 451 , Bacteria ,
Proteobacteria , WP_227738550.1
phosphomannomutase/phosphoglucomutase [Wolbachia
endosymbiont of Drosophila simulans]"
gene 32660..33868
/locus_tag="wEsol_00783"
CDS 32660..33868
/locus_tag="wEsol_00783"
/codon_start=1
/transl_table=11

```

```

/product="hypothetical protein"
/pfam="Pfam-B_13991 AAA_13 Mod_r"
/translation="MPQENENVFIAESQSLDVDEQQKKDILDVIESCSSFQETIKQLE
EKNLIWYFIGPLRKDEDITGQINLKWEKEFQKFEQSINETHREFEASLPNQNFLAYST
KDDDFKIRFENEKPIEISNILRASSEGKVYNISLGKDSQITATKKGSEHYDFTGSS
SCEMTINWQAKDSEGN SIDCSMTVKLD SGGIQSVIGEPKFGGITSSEEVLKLVGQNK
VFINRKTLYQAFTDIGQDMDSLEPTQDLSSQLPTPSSSGYSSPSTPSSRRSSISTSSE
FSDEDEIFEDDMSGDEEEYEQEGDKDKVDEIINEIEELKEGKETFAQHFAAQAKQLED
LRLERDSL RDKVNEQQRAIFER GQRIKEQEELQDKNDVIKNLNNQLKDKEGETNEAN
KELQRKVKLI"
/besthit="qcoverage 89.5522388059701 , hcoverage
68.5714285714286 , similarity 100 , identity 100 , evaluate
8.27e-238 , alnlength 360 , Bacteria , Proteobacteria ,
WP_041573599.1 hypothetical protein, partial [Wolbachia
endosymbiont of Drosophila simulans]"
gene 33895..34731
CDS /locus_tag="wEsol_00784"
33895..34731
/locus_tag="wEsol_00784"
/codon_start=1
/transl_table=11
/product="hypothetical protein"
/pfam="Herpes_BLR2"
/tigr="TIGR02168 SMC_prok_B 1181 chromosome segregation
protein SMC"
/translation="MENDLKKIVEGLKDDHKKQLAEQLMETKKENNTLAETASQLSEE
LNELQREKEDLEREIRQLEPGRSLADELSEENTKGEIEKLQYQLKEGMLTCTQEEL
ASVKESLEQLQNILQQEKQATQTEVEYESRGTSMQQQDQGIQAVNNNSSRTASGLRQ
ENKKLTRDKLTISEQLKQKIREIDELKKNLKLQLEENKQLKQEVTKNAGVDASSSTGQ
KEAKEAEVIPQNIMDWPVPIPD DKPEEQKTPLEPIKVNTELSDPKSIPAE GPEKSPPL
SK"
/besthit="qcoverage 100 , hcoverage 60.5664488017429 ,
similarity 97.5 , identity 96.8 , evaluate 5.00e-112 ,
alnlength 278 , Eukaryota , Arthropoda , GFY79758.1
uncharacterized protein TNIN_54101, partial
[Trichonephila inaurata madagascariensis]"
gene 35253..35504
CDS /locus_tag="wEsol_00785"
35253..35504
/locus_tag="wEsol_00785"
/codon_start=1
/transl_table=11
/pfam="DEDD_Tnp_IS110"
/fullproduct="qcoverage 100 , hcoverage 100 , similarity
100 , identity 100 , evaluate 9.78e-51 , alnlength 83 ,
Bacteria , Proteobacteria , WP_051062211.1 MULTISPECIES:
hypothetical protein [unclassified Wolbachia]"
/translation="MCKELRSFGLPAICVDARHMAAALSARINKNDKNDARGIAQMMR
SVSKISCQIKIALGSRRLMCSKQQVIGTIRGLLLKIHR"
/product="hypothetical protein"
/besthit="qcoverage 100 , hcoverage 100 , similarity 100
, identity 100 , evaluate 9.78e-51 , alnlength 83 ,
Bacteria , Proteobacteria , WP_051062211.1 MULTISPECIES:
hypothetical protein [unclassified Wolbachia]"
gene 35494..>35791
CDS /locus_tag="wEsol_00786"
35494..>35791
/locus_tag="wEsol_00786"
/codon_start=1
/transl_table=11

```

```

/pfam="Transposase_20"
/fullproduct="qcoverage 100 , hcoverage 81.1475409836066
, similarity 100 , identity 100 , evaluate 8.11e-62 ,
alnlength 99 , Bacteria , Proteobacteria , WP_174516888.1
transposase, partial [Wolbachia endosymbiont of
Cardiocondyla obscurior]"
/translation="MVGKGSKFETFALRIQEAINNLDEISRSSIEALVCSLEAIEKSL
RKLDKMLSEQGEKDDCKLLTTVPGVGIIIVAMTYKAAIDNPHRFEKSDTVGAYIG"
/product="transposase, partial"
/besthit="qcoverage 100 , hcoverage 81.1475409836066 ,
similarity 100 , identity 100 , evaluate 8.11e-62 ,
alnlength 99 , Bacteria , Proteobacteria , WP_174516888.1
transposase, partial [Wolbachia endosymbiont of
Cardiocondyla obscurior]"
gene complement(20981..21063)
/locus_tag="wEsol_tRNA-15"
tRNA complement(20981..21063)
/locus_tag="wEsol_tRNA-15"
/gene="tRNA-Tyr"
/intronpos="0..0"
/program="tRNAscan-SE"
/cove_score="69.2"
/evidence=predicted
/type="Tyr"
/anticodon=GTA
/product="tRNA-Tyr (GTA)"
gene complement(20906..20976)
/locus_tag="wEsol_tRNA-16"
tRNA complement(20906..20976)
/locus_tag="wEsol_tRNA-16"
/gene="tRNA-Gly"
/intronpos="0..0"
/program="tRNAscan-SE"
/cove_score="76.5"
/evidence=predicted
/type="Gly"
/anticodon=TCC
/product="tRNA-Gly (TCC)"

```

#### ORIGIN

```

1 taacacacaa aaacaaagaa tctataatTT aagcattcca tttagactgt agagcaccag
61 aataaactat ttagtaacaa ttcctgcata aactatgttt ttaaaatTTT ttgacgttta
121 actttattat aactttttct ttattttgtg aatatctgag ttacttatat tatgtaagaa
181 atctattgcc aactagtcaa tattctgtta ggaattaaga taatataaag ttattatgct
241 taaattggaa agcagaaaag tcttgattac tggcgcatca ggcggaatag ggcaagcaat
301 tgtaaaaatt atgcacaaaag cggagcaac tttatgtatt tctggcacia aaaaagaagt
361 gtcgaagaa gttgctaaac aatatgaaaa aaacatgcat gtactccctt gtgatttata
421 aatgctgag gaagtaaatc aactaataaa tagagcaagt gagctgatgg aaggctttga
481 cgggctcgta tgcaatgcgg gtattacgag agacagtTTA ttattgagaa tgacagatga
541 agcatggcag aaagtaattg atattaactt gagctctaca tttaaactga gtagagaagc
601 atgcagaaaa ctaattaaga ataattgggg aagaattata aatatttcct caataatagg
661 gctgacagga aacgccgggc aagcaaatta tgcggcgtct aaagctggaa taatagctat
721 gagcaaatcc atagcaaaaag aagttgcaag tcgtaataa acagtaaaat gtattgctcc
781 tgggtttata gatactaaaa tgactgaagt tttaaatgaa ggacaaaagg gaaaaatatt
841 agataatatt ccaatgaaaa gaatgggaac aggggaagaa atagcagcag gggctctggt
901 tttagcaagt gatgaagcaa aatatataac agggcatgtg cttaacatta atggtggggt
961 atttatgtag caacacttat gtatggacaa attataattt ttacttttaa ataaaaatat
1021 gtgtaggttt aggtttgctg taatttatta tttagaggca aaaaaatgag ctctataata
1081 ggattttttg gtgttttgtg tgtagtattg cttttctctt tctcaggTTA tgcagataac
1141 cctgggtgtg atatggatga cacaactaaa gtaatatgca atattattgg ttatgtttgg
1201 gggataggcg gtccacttat gacggtagta ataattggtg cagctttgct tgcaatattt

```

|      |             |             |            |             |             |             |
|------|-------------|-------------|------------|-------------|-------------|-------------|
| 1261 | ggcaggatgc  | cgtggccagc  | cctcttttgc | cttggcatgt  | tctgtggtgt  | atTTTTtggc  |
| 1321 | gctaaaacta  | tcataacgaa  | aattatgccc | aacgtaagcg  | atgaagcaaa  | aactatgttg  |
| 1381 | gaaaagtgtg  | gacaaaaata  | atccaaaaag | tgcagaaatg  | ctTTTTtgtt  | atccattaaa  |
| 1441 | ccgcttcata  | tcttcaactt  | gcaacaaata | agggctatct  | tttggtagag  | ttttaacagc  |
| 1501 | taactcagcg  | tatttcataa  | attgctttta | atcaccttca  | atacaagcct  | tttttgtcaa  |
| 1561 | ggcaaaataa  | tgcattgccg  | tatcagcttc | acattttatat | gcaatgctta  | aatatattcca |
| 1621 | gacaaaagcg  | ttatttggtt  | ctacattcaa | aatctgctcc  | aggtaaaaaa  | tcgccttttt  |
| 1681 | tgcattcaccg | tgtataataa  | aagtatgaga | taatgcaagt  | ttcactaaat  | aactgttttt  |
| 1741 | ctcagataaa  | tacctaaagc  | attcctcata | cattttttatt | gcttcactta  | aattttccggc |
| 1801 | cttgatatagc | atctctgctt  | ttaattcata | taggtatgga  | tcactgtgtg  | attcttgaat  |
| 1861 | caatgagtta  | acttttagcaa | tagcctcttc | tatctttcct  | tgcctatagc  | aaactatagc  |
| 1921 | atttacatac  | tcagaattat  | cttcataatt | attagataac  | acatgaatag  | gagcaaagaa  |
| 1981 | agagtctagc  | tttgcaacca  | cacgctcaaa | ctttagtaac  | ttatccgcaa  | aaattgggtt  |
| 2041 | tacgttggtt  | ttaaccttat  | aattttgtac | agcaaatatg  | cgtttctcac  | taagtgggtg  |
| 2101 | agtgcggaaa  | tattcctcgg  | tgttctcatg | ctcaataact  | ttaaaataat  | caaaaatctc  |
| 2161 | tttcatacct  | gaattatcat  | agccagattc | atcaagatac  | cttaaagcat  | agctatctgc  |
| 2221 | tacactttct  | tgctcttgag  | aatagttaaa | aaatagcctt  | gaactaaacg  | ctacaccact  |
| 2281 | aagcaaaatt  | gcaccagcaa  | cctgagggtt | aatgataata  | ctagaaacta  | atcctaccat  |
| 2341 | ataactaatc  | attgctatcg  | attgaaaata | acccatagca  | ctactcattt  | gcaatatatg  |
| 2401 | accagcagat  | atgtgagcaa  | tctcatgtgc | taatatacca  | agcaggacat  | aaggtttagc  |
| 2461 | cgaatattgt  | aaaagtccta  | aatgaatgaa | aatactgtta  | ttgttaatta  | caaaagcatt  |
| 2521 | aatcgaattg  | tcattaatta  | taaaaacttt | tatttgctca  | tgatcaatat  | ccgcagcaga  |
| 2581 | aaataaagg   | tgcgctagct  | ctttcactat | tgcttccact  | tcactatctc  | taataatggt  |
| 2641 | aatagagtaa  | gcattattac  | aatatgcaaa | aaagaacaat  | aaggtaaaaa  | acttagcaac  |
| 2701 | tctaaacatg  | aaaattctgt  | gcttgataaa | tttatagaaa  | tcctatatatt | taacacttaa  |
| 2761 | attatacaaa  | tttataaacg  | ctagtttaaa | tttttaacgt  | aactgataag  | tttgtcgatg  |
| 2821 | gtagttaact  | taattttatg  | ttgttcagca | aatttaagta  | actgaggtaa  | gcgcatacata |
| 2881 | gagccatcat  | cattcactaa  | ttcacaaata | actgctgaat  | gatcaaacc   | tactaacttc  |
| 2941 | gccatttcaa  | cactcgcttc  | agtatgacca | gcacgttgtg  | ccacccacc   | tttatgtgca  |
| 3001 | attacaggaa  | aaacatgacc  | tggagttatg | atgtcatcct  | gagtaccatc  | cttggtgata  |
| 3061 | gcagcatgta  | tagttttcgt  | tctatcctct | gctgaaacac  | cggttgtaat  | gccataacgt  |
| 3121 | gcatcaattg  | atgtagtaaa  | tgcggtatga | ttttcaccaa  | tatttttctt  | ttccatgaaa  |
| 3181 | ttaaggccca  | accttttcat  | gtgaaattta | gtcattgcta  | agcaaacaac  | ccctgtaccg  |
| 3241 | tacctaacca  | taaaagccat  | atgttccggc | tttattttct  | cagctaagac  | aatcaaatcg  |
| 3301 | ccttcatttt  | ctctattttc  | atcatcaact | aaaatgaata  | atttaccgga  | acgagcatcc  |
| 3361 | tctaatacat  | cttccacaga  | agaaatacct | ggtagactca  | ttgaagcata  | agtggcctgt  |
| 3421 | accataataa  | tttacttaaa  | ttcaatctta | actattttat  | acaattttct  | tccatttggc  |
| 3481 | actgtcactt  | ccacatatct  | accgactttt | ttgccgatta  | aggcactccc  | aagtggtgaa  |
| 3541 | ctagtagata  | ttaactgctt  | tgaacatca  | gcttcataatt | cgctacaac   | cttataaaca  |
| 3601 | tattccactt  | caccgttatt  | atcacttaac | atgcttaatt  | tcacagttgc  | accaaactt   |
| 3661 | actgaatcac  | cagacaaatt  | ttttacttct | attacttccg  | catgtgagag  | cttactttct  |
| 3721 | atctccatta  | tacggccttc  | aataaaacct | aacctttccc  | gtgctgcatg  | atactctgcg  |
| 3781 | ttttcagaca  | aatcaccttg  | atcacgagca | tcagaaaatg  | cctgtatcac  | agaaggtttt  |
| 3841 | tcttccttta  | atTTTTcaag  | ttcggttg   | atattctcaa  | aaccttccct  | cgcatagga   |
| 3901 | aattttattaa | taatggatga  | agccataatc | accacctaaa  | cgcaattaaa  | ttgagtaacg  |
| 3961 | aaattactca  | caatgttaaa  | aatatcacct | tttatatcat  | cactcatgtc  | atTTgacaac  |
| 4021 | ttttttaaaa  | ccccagggtg  | tacagtatga | aaataattaa  | taagatcatg  | ttcaaattta  |
| 4081 | ttaatgtaac  | ttatttgat   | tttacttaac | tgattatata  | ggttagaaaa  | aatatacatc  |
| 4141 | agcactactt  | gctcttctat  | tgacataggt | aaatgttggt  | tttgctttta  | taactcgaca  |
| 4201 | agatattttac | ccttattcaa  | ggataattga | acactagcat  | caagatcaga  | accaaatttt  |
| 4261 | gcaaaatctt  | ctaattctct  | atactgagct | aagcttagct  | ttatagaacc  | agcaactttc  |
| 4321 | ttcacagact  | ttagttgtgc  | agcagaacca | acccgtgaaa  | ctgacaaacc  | tataatttact |
| 4381 | gcaggctgaa  | atcctttata  | aaataattca | gactcaagaa  | agatctgcc   | atcggttaatt |
| 4441 | gaaataacat  | ttgttggcac  | atatgcagat | acatcaccag  | cttgagtttc  | gacaattggc  |
| 4501 | aaagcagtta  | aagaacctg   | ccctttttta | tcagacattt  | tagcagctct  | ttcaagcaag  |
| 4561 | cgagaatgta  | catagaatat  | atctccagg  | taagcttcac  | gaccaggagg  | acgtctgagc  |
| 4621 | aataaagaca  | tctgcctata  | tgccacagca | tgcttagata  | aatcatcata  | tataatcaaa  |
| 4681 | caatgcattc  | cattgtcacg  | gaaaaattcc | ccaatagtgc  | aaccagcata  | aggtgctaaa  |
| 4741 | aattgcatag  | gcgcgcagtc  | agatgcacta | gccacaacta  | cagttgtata  | ctctaattgct |
| 4801 | ccgctttctt  | tcagcttatt  | taccactttt | gctactgttg  | aaatTTTTtg  | cccaatagca  |

|      |             |             |             |             |             |            |
|------|-------------|-------------|-------------|-------------|-------------|------------|
| 4861 | acataaacac  | agtaaacttt  | ttgatttttcg | tttacctcat  | cgttaatcct  | cttctgattg |
| 4921 | ataatagtat  | caagcgcaat  | agtagtttta  | ccaatttgct  | tatcaccaat  | aattaattca |
| 4981 | cgctgccctc  | tacctattgg  | aattagcaaa  | tctataattt  | taattcctgt  | ttgcagtggc |
| 5041 | tcatgcacag  | acttacgatc  | aataatgcct  | ggcgctttag  | attctatatc  | cattctgttt |
| 5101 | ttggctctaa  | tttccccacc  | gtcgtccata  | ggatggccca  | acgcattttac | aactctccct |
| 5161 | aacaattcat  | gccctacagg  | cacctgcaca  | acatcaccac  | tacatttttac | aacgtcccct |
| 5221 | tctttcacat  | cacggtcatt  | accaagcaca  | actattccag  | ccgtatcatg  | atctaaatcg |
| 5281 | agaactattc  | cttctacacc  | acttgcaaaa  | aatacctttt  | caccgaattt  | tgctttttcc |
| 5341 | agcccataaa  | ccaatgcgat  | accatctgtt  | actgaaatta  | cttcacctat  | atcttcccgc |
| 5401 | tttataggat  | tatcaaacgt  | ctcaaccttt  | tctcttatta  | tacttgctat  | ctcagaaaca |
| 5461 | ttcatactgt  | tcttcataca  | aaattcctta  | cttttaatat  | ttccattttta | cttaagtcaa |
| 5521 | ctaacctatc  | caagtaactt  | tttagcggaag | catcgatcaa  | attaaaacca  | tacctaacta |
| 5581 | cgaagccacc  | tagtatagaa  | gggtcaacca  | cattgcttac  | ttttattatt  | ttaccaagaa |
| 5641 | agctcaaaga  | ttcagtaatt  | atcttttata  | cagattcctt  | taaagtttct  | gctgacttta |
| 5701 | tagtaatttc  | gaattcattt  | tcattttctc  | ttgcaagact  | taagaatttt  | tctaataata |
| 5761 | ggatcaataa  | actagagcgt  | ttattttgcaa | atataacccat | aataaatttt  | actaaattct |
| 5821 | cactcaagtg  | ctcattttata | gaaagcatca  | cttctttttt  | gtgtgcaaaa  | gaaatcatag |
| 5881 | gatgagatag  | gtacacaaaa  | acatcacggt  | gatccttaaa  | aaaagccaac  | aaaaattcta |
| 5941 | cttcttttct  | tataatacct  | aacctgcttc  | ctgagacatg  | aaatagcact  | ctagcgtaag |
| 6001 | atgaaactaa  | attattgtat  | tgggtctttt  | tcataattaaa | tccagtaaat  | ctaaattaat |
| 6061 | tcagctacaa  | atcttttcatt | cttcaatcca  | agcatttttt  | atataaacag  | gtcttctctt |
| 6121 | taaggaaaga  | aaatataaat  | catatctgac  | tgaataatct  | aaaaaactaa  | ggtttttact |
| 6181 | taagaaatac  | ttagaagaat  | ttataataga  | ctgacattga  | agatgagata  | tcggtatttc |
| 6241 | ttttccaagt  | aaacttggtt  | taacttctat  | aaaaatcagc  | tccttttttt  | tagatacaat |
| 6301 | taagtcaatt  | tcaccgaact  | tacaacggta  | acggcggttt  | ataacattat  | accatttcag |
| 6361 | ttttaaatat  | actaaaacta  | ataactcgcc  | aaagtaacct  | acaaagtagc  | gtaacctact |
| 6421 | taccacaaga  | agaacaatta  | tgataacaat  | taactttgtg  | taactacttt  | gcctccttct |
| 6481 | ttattttttac | tataaacctt  | acctcttgct  | gcaatatccc  | tatcaaccag  | ttctatcact |
| 6541 | gccattgaag  | cgcaatcacc  | ctttcgagtg  | ctaaatttta  | ttattctaga  | ataccacact |
| 6601 | ttacgatctt  | gataacggct  | ggctaagacg  | tttaataact  | tatcaactgc  | taacttacta |
| 6661 | ttatgaaggc  | gtgaaagcaa  | aagtcttcta  | ccatgtaaag  | tattcttatt  | cttagcaatt |
| 6721 | gtaataaaact | tttcgacata  | tggacgaagt  | tccttagcct  | ttggtaaagt  | agttacaatc |
| 6781 | tgctcatggt  | taattaatga  | gatagataga  | ttcttttaacg | tcgataacct  | atgttcagta |
| 6841 | caacgagata  | gttttacgttt | ttttattcca  | tgtttcatat  | atcacctaata | cttcatcagt |
| 6901 | atgttggttta | gccaaactcat | ctatatcctt  | aggtggccag  | tttagcacat  | tcatacccaa |
| 6961 | agacaagcca  | aaatttagtca | aaactgcctt  | aatctcattc  | aaagactttc  | tgccaaaatt |
| 7021 | agcagttctt  | aacatttcac  | cttctgtctt  | ttgcacaaga  | tcacctatat  | aagtgatggt |
| 7081 | ttcgttttttc | agacagttat  | gagacctgac  | agataattcc  | atttcatcta  | ccttacgcaa |
| 7141 | taagataggg  | tcataaaccca | aatcttttagc | accactagac  | gaagaaacct  | gcgatttttt |
| 7201 | ataacttaca  | tcagaactaa  | taaagggctg  | aagttgctcc  | tgtaatatct  | ttgcagcaga |
| 7261 | gtcaacagct  | tgactcggag  | aaattgtacc  | atcagtttca  | attgacaata  | tcagcttata |
| 7321 | cttatcagtc  | acttggccaa  | cacgactggt  | ctctaccctg  | tacgaaaccc  | tggtgacagg |
| 7381 | gctatacaaa  | gcattaactg  | gaataaaacc  | aattaaatcc  | tgttcactca  | taagcttcaa |
| 7441 | aagttcattt  | tcttttatatt | tagttacagg  | aagataacct  | tttccgctag  | ccacatatat |
| 7501 | ggtcatgtta  | agctccacat  | tttgccccag  | cgtaacatatt | aacaaatctt  | tattaacaat |
| 7561 | agagcattga  | tcatcagttt  | ctatcatccc  | agctaataacc | tggaagggcc  | ctttagcggt |
| 7621 | taaattttaag | cattttattag | aagcaccatt  | taattttacac | ctcaacatac  | ccatatttaa |
| 7681 | tactatatca  | gttacgtctt  | ctctcacccc  | ttgaattgaa  | gtgaactcat  | gagttacacc |
| 7741 | ttcaattttt  | attccataaaa | cagcactacc  | tttaagagaa  | gataacatta  | cacgtcttaa |
| 7801 | tgcatctacc  | aatgttaaag  | caaaaccact  | ttccaacggg  | tctagcacta  | tatcactttt |
| 7861 | ttcacttgaa  | tcactctgata | ttaccttaac  | tgaactaggt  | ttaatcaatt  | tatctaaatt |
| 7921 | gctacagaga  | gaaacatcat  | tattataata  | cataaaaacaa | cctttttcaa  | tatcctatac |
| 7981 | tcttcttttt  | tttcttaaac  | tgcacccatt  | atgaggaatt  | gcggttttat  | ctgcaattga |
| 8041 | agtcacagtc  | aaccacagc   | tctgaagtgc  | tttaaccgca  | gcttcggtag  | caaagccagg |
| 8101 | accgcgaatt  | attacagaga  | caaccttcat  | accaaattctc | tccattgcgt  | tcttcgcagc |
| 8161 | agactccgca  | gccttacctg  | cagcataagg  | tggtggatttt | ctcgaacctg  | aaaaaccaca |
| 8221 | tgacccacaa  | gaagtttgac  | atagcgtatt  | accatgaaca  | tcagttacat  | ttacaaaagt |
| 8281 | attattaaaa  | gttgacgaa   | tatggacaac  | accagtaata  | aactccttct  | tactcttact |
| 8341 | aaccgttttg  | acttttttca  | ttaaaactca  | caataataat  | aaatttttatt | ttttcccagc |
| 8401 | aataggcaac  | cgagatctac  | ctttacgagt  | cttagcatta  | gtatgagtcc  | tttgccctct |

|       |             |             |             |             |             |             |
|-------|-------------|-------------|-------------|-------------|-------------|-------------|
| 8461  | cacaggtaaa  | ccttttctat  | gtctcaccce  | tctatagcat  | cccattttcca | ctaaagattt  |
| 8521  | tatgttcata  | gccacttctt  | ttctgagctc  | accttctata  | acataatfff  | gtctaatagaa |
| 8581  | accgctgac   | ttttctatat  | cttcatctcg  | taattctgaa  | acacgtttgc  | gcttatcaac  |
| 8641  | ttcgcaagcg  | tgacaaatta  | cattcgagct  | agcaatacct  | ataccatata  | tataagttaa  |
| 8701  | tgcaaaagga  | acacattttcc | tcactggaat  | atztatgcct  | gcaatacgtg  | ccactgggtac |
| 8761  | ctcgatactt  | tattaataaac | aactcttaat  | ttataccata  | aaacaactca  | gagtcaaacc  |
| 8821  | aaattacaag  | aaattttact  | ttcaatctct  | tgcgttacct  | catcaacact  | caaattagcg  |
| 8881  | tcaattgtta  | ataatttgcc  | tttataatac  | tcgcgtaaac  | ctttcatttg  | aagggtgat   |
| 8941  | tcactttatt  | tcttattaat  | tgcagacata  | tcagcatcat  | caattctttt  | ctctaaccct  |
| 9001  | gtactttttac | athtagcaca  | agtagtactc  | ttaaaagaag  | atacactata  | tatgctttta  |
| 9061  | cagtccaaac  | acgcgagacg  | atftttttaac | ctatcgattg  | caatattatc  | gtcaagctgc  |
| 9121  | agctcaacta  | caatgtcaac  | atccctatta  | tattttttctt | gcaaaacttg  | agtcaaaaaa  |
| 9181  | tgagcctggg  | ttaaattttct | cggaaaacca  | tctaataagc  | aattatcatc  | cactaatgca  |
| 9241  | agctggtcac  | gtaataatcc  | acataataat  | tcatcttgaa  | ttaaattacc  | agattccacg  |
| 9301  | gtacccttta  | tttttttacc  | taactcacta  | ctgctagata  | taatattcct  | taataaatcc  |
| 9361  | cctactgaaa  | ttatttttaa  | atttatattt  | gctattaaca  | agcttgactg  | agtaccttta  |
| 9421  | ccagaacctg  | gaggaccaa   | aatcgtaatg  | atcatcttac  | tttcctcggt  | ttagactcat  |
| 9481  | atftctttat  | ccagttgtcg  | tacctatttg  | aaaaaatata  | agattgtatt  | tgcataatag  |
| 9541  | tatcagtaat  | aacgttcact  | ataatcagta  | agctcgtccc  | acaaaaaata  | aatgggtatat |
| 9601  | cataataata  | tctcataact  | tcaggtacag  | tacatatgac  | taccaaatac  | gcagagccaa  |
| 9661  | tgaatgtcaa  | cttaaaaact  | atatcttgaa  | ggtaatcaga  | agtatgtttc  | ccaggccttc  |
| 9721  | taccaggtat  | aaaaccacca  | tttttttttaa | gaaaatctgc  | gttttcctct  | ggattaaata  |
| 9781  | taaaattggg  | atagaaaaaa  | ttaaaaaata  | ctatcagcac  | caaataaggct | acaatatata  |
| 9841  | ctacttttatt | tgccataaag  | taattcaaaa  | taaaatcaga  | aaaagcgtgc  | cccttataga  |
| 9901  | aatttgcaat  | tgaataaggt  | gtcaataaaa  | ttgcattagc  | aaaaatgggt  | gggtactacac |
| 9961  | cagataaatt  | aatcttcaat  | ggaatataag  | taaaatcgtc  | attatgtaat  | cttttaaatt  |
| 10021 | gcttttttagg | atggtgaaca  | ataacctttc  | tataagaaga  | ctctacaaaa  | atgactaaga  |
| 10081 | gtagcagcaa  | aaaaaacaat  | acaaaaacaa  | aaaggataat  | aaataacgat  | acgctaccgt  |
| 10141 | ttttattttaa | cggttaacaaa | gatgacaaaag | cgctgtgtaa  | ctctgatatt  | ataccctgta  |
| 10201 | aaatgattaa  | tgagatacca  | ttgcctatac  | cgctagcgct  | gattcgttca  | ccaagccata  |
| 10261 | ttaaaagcat  | agttccacct  | aaaaggctga  | aaacacctat  | tgtacgaaac  | ataacaccag  |
| 10321 | gttcgattac  | aaccaataacc | ccttccctat  | tcatcccttc  | caatccaacc  | aaaattggaa  |
| 10381 | ttgattgaaa  | tacacaaatt  | actatgggtca | gatagcgtat  | ataagaattc  | atctttctac  |
| 10441 | ggcctgactc  | tccatcattc  | ttactttcct  | tcatcctttt  | aatcgagaaa  | gaaagtaact  |
| 10501 | gaataatgat  | agaagccatt  | atatatggca  | taacgttcaa  | tgctagaatt  | gtcattctag  |
| 10561 | ccaatgcacc  | accagaaaat  | aaattaaata  | ctccaaaaaac | gcctgagcca  | tctttgggaa  |
| 10621 | atatatcatt  | aattacatca  | agattaattc  | caggaatagg  | cacataagta  | ccaagcgat   |
| 10681 | agcaaattaa  | agctatttagc | gtaaaaaata  | tacgcttttaa | taaatacgct  | ttatataaca  |
| 10741 | acgtaagatc  | caagctatta  | aatgctgatt  | tattgcccac  | gacttacgat  | agtattttcca |
| 10801 | cactaccaca  | aactgaagct  | acagattttt  | ttgcagcttc  | tgacgcaaaa  | tcaacatgaa  |
| 10861 | acacaaattt  | ttcgctcaac  | ttacctttat  | taagaagttt  | aatttttatcc | ttaatagact  |
| 10921 | ttataaaaacc | taattttatac | agcctctcct  | tatctataac  | agagtctttc  | actatttttt  |
| 10981 | tagctttccat | taagcgctgt  | atatcgccaa  | cattaattat  | agagtatatg  | ctcctacgta  |
| 11041 | taggcttaaaa | acctcttttta | ggcaaacgag  | tatatataga  | ctggtgtcca  | ccctcaaaac  |
| 11101 | catttataga  | aactccactt  | ctagcctttc  | gcccttttatg | ccctctaccg  | gatgtttttac |
| 11161 | ctttaccaca  | accgatacct  | ctaccacgca  | acttaggctt  | ctttttctta  | gataattttag |
| 11221 | taaatataga  | gttttaatttt | acagcattat  | tcatacttta  | cctgttttcca | actatctcgc  |
| 11281 | taatcttttt  | gcctcttttg  | cttgctacct  | gacgaggaga  | taacatacta  | tcaaaagcct  |
| 11341 | taaacaccgc  | acataataacg | ttatgaggat  | tatttgatct  | agtggattta  | gtaccacat   |
| 11401 | cctttataacc | taacacctca  | aaaactgatc  | taatcgctcc  | accagcaata  | atacctgttc  |
| 11461 | cggctccttg  | ggttctttaa  | actatctcac  | cagaacaaaa  | tttagcttta  | atatcatgat  |
| 11521 | gcaaagttct  | accttcacgc  | aagtacactc  | taatcattga  | tttcttttgca | gcattttacag |
| 11581 | ctttgactct  | tgcttcagca  | acttctgcgt  | gcttacctat  | tccacacct   | accctacct   |
| 11641 | tctcatcgcc  | aacaacaacc  | aaaattgaaa  | atgaaaaatc  | tctaccacct  | ttggtaaccg  |
| 11701 | ttgtcactct  | tcgtaccgaa  | actaaaagct  | ctgataaaatc | attattattt  | tgtaaaattct |
| 11761 | ttatagccat  | attcaaaaacc | ttctaaaatt  | caaataccaga | acttcttaaa  | gcctcagcaa  |
| 11821 | attgagaaac  | taatcctgtg  | tattttatacg | ctccacgatc  | aaacgtaagc  | tgctgctcta  |
| 11881 | atftcatgcc  | agacagacgc  | tcaaccatta  | agaagaaac   | ctgtttttata | gttttcagcgt |
| 11941 | tgacttttccc | tttacatata  | tccttaattt  | tagcatccaa  | agtagaagct  | gaagtgagag  |
| 12001 | ttattccttt  | tacatcatta  | attaactgga  | cataaaaaatg | cctatttagat | ttaaatatgg  |

|       |             |             |             |             |             |             |
|-------|-------------|-------------|-------------|-------------|-------------|-------------|
| 12061 | atatacgtaa  | acgttcagcg  | ctcttggtcaa | gcttcgctct  | attacgtaac  | ttcctttttt  |
| 12121 | cagaattact  | taaaaaatta  | tacgatcttt  | tcatttttat  | tacttctttt  | tacttacaac  |
| 12181 | cttacgcagc  | ataaatttgc  | cttttattac  | aacaccctta  | cctttataag  | gatcataatt  |
| 12241 | tctaattttg  | catatatcag  | acgccaccat  | atagaccttc  | tgcttatcca  | taccactaac  |
| 12301 | tactaagtga  | gttggtctta  | tgcacttaat  | ctcaacatct  | ttaggcactt  | tatatattaac |
| 12361 | attatggcta  | taaccaagat  | ataaagtcaa  | atacttacca  | tcacactctg  | ccttatatcc  |
| 12421 | cacaccgtta  | atctcaagat  | taacagaaaa  | accatcaacc  | atgccgttaa  | tgatattatt  |
| 12481 | aatattactc  | ctataagtgc  | cccacatagg  | ctttatttta  | tcataattat  | ctttatcttg  |
| 12541 | atcaacagaa  | agcaatagct  | gattatcaat  | aatctgacac  | acaacatccc  | tgatcaagct  |
| 12601 | aacttccttt  | tcagccttag  | cgctctttat  | taacatacta  | ccattattat  | attcaactga  |
| 12661 | aacaccagca  | ggaatatattg | taggagcagc  | acctatacga  | gacatgaatt  | tctcctatta  |
| 12721 | tttaaaacac  | acgacacaaa  | acttctccac  | caacctttta  | cttatgtgca  | ttataatcag  |
| 12781 | tcatcactcc  | tttggtgtgc  | gatataataa  | aaataccaag  | accattatat  | gctttagaaa  |
| 12841 | tgcccttata  | cttagaataa  | cgacgacaac  | caggctttga  | caccctaact  | atgtcactaa  |
| 12901 | ttacaggtga  | cttctcataa  | tacttcaatt  | ttacaatgaa  | agaaggtaaa  | ttatctacaa  |
| 12961 | cttgcttttc  | ataatcaagg  | atataccctt  | cctcttttaa  | aatctccaat  | atagaagaat  |
| 13021 | tcactcttaga | aaatagtacc  | cttggtgccc  | tatgcattgc  | caattgagca  | ttacgtatcc  |
| 13081 | ttgttaaaaa  | atcaccaata  | ctatcagata  | acgccacaat  | atactcctta  | tattatattt  |
| 13141 | accaactaga  | ctttgtaact  | cctggaatth  | gccccaaaaga | acataaatca  | cgcaaaacaa  |
| 13201 | ttctacataa  | accaaatttt  | ctatatactc  | ctcttggtct  | cccagttaaa  | gcacacctat  |
| 13261 | ttctaatttt  | ggttttagaa  | gaatttctag  | gcaatttttt  | aattaattta  | ttttgagctg  |
| 13321 | taaacccttc  | tacaatagac  | aaattcttat  | tatttattat  | agatttcaat  | ttttctcttt  |
| 13381 | tttctttata  | ttgatcgcac  | aactttatth  | tgcggaagatt | tctttctatc  | atagattttt  |
| 13441 | ttgccatata  | tttctcctct  | caattaatca  | aaaaaaggaa  | atttaagagc  | cagtaataat  |
| 13501 | tcctttgctt  | ccttatcact  | aactgcactt  | gttataatat  | taatatccat  | acctctaatt  |
| 13561 | ttacttattt  | tatcatagtc  | tatttctaaa  | aacgagatat  | gttcctttat  | accaaaggaa  |
| 13621 | aaattaccat  | taccgtcaaa  | ttgcttcaca  | ctaaatcctc  | taaaatcttt  | ttcccttggc  |
| 13681 | aaagcaatat  | atatcaatct  | ttctaaaaac  | tcatacattt  | tatctctacg  | caaagtactt  |
| 13741 | ttgcaaccta  | ctgtagcacc  | ttttctgatc  | ttgaagccag  | aaatagattt  | ttttgcaaaa  |
| 13801 | gttgataaaag | gcttctgccc  | agcaatcaaa  | tataggctat  | caagtgggtc  | atttattgct  |
| 13861 | ttactatctg  | tagcagcatc  | tccaacgccc  | atattgatac  | acaccttgac  | aagttaggcg  |
| 13921 | acttgcatta  | tattgccgta  | attaaactta  | tccttcaagg  | actttactat  | gctatcttta  |
| 13981 | tacaattctt  | taaacataatc | aacctaatct  | atcacttctc  | cagaaaacttt | tgcaaaacgc  |
| 14041 | actttttctac | cgtctataaac | cttaaacccc  | actctagtth  | gagttttata  | tttaggggtc  |
| 14101 | aatgtttgcaa | cgttggtatg  | atcaatagct  | aactctttat  | ttaatatacc  | accactacta  |
| 14161 | ccagcttttg  | gttttagtatg | tctcttatgc  | acattcactc  | cagaaacaat  | tactttcttt  |
| 14221 | ttagcatcac  | gtgctataaac | tttgattacc  | ttaccaattt  | ttcccttatc  | tttaccagtt  |
| 14281 | aaaactataa  | cgtcgtcacc  | actttttatt  | ttagcactca  | ttataaaaacc | tcaacagcta  |
| 14341 | atgacattat  | cttcataaaa  | gaaccagatg  | ataacttttt  | taccggacca  | aacaccgag   |
| 14401 | tgccaagtgg  | ttcaccttga  | tcattaatca  | aaactacagc  | attgctagaa  | aaacgaatta  |
| 14461 | cagaaccatc  | agatttttcta | atagggcttt  | tcaccctcac  | cacaactgct  | ctatataact  |
| 14521 | ttcccttctc  | aactttccct  | cttgaggtaa  | tagatttagt  | agatacaata  | actgtgtcac  |
| 14581 | ctatagatgc  | agatttttcta | ccaccaata   | aaccaatata  | aagcactgca  | cgcgaccag   |
| 14641 | aattatcagc  | tacttccaac  | aatgtatttt  | tttgaatcat  | ataaatatcc  | tattcaatgt  |
| 14701 | gagctattaa  | caataaccca  | tttttttagta | gtagaaaatag | gcttgtgttc  | ttgtattaaa  |
| 14761 | accttgtccc  | cttctttaca  | actattatth  | tcatcatgtg  | ctgtataact  | cttgtatttt  |
| 14821 | tttataacct  | ttttatacag  | ctcatcctta  | tacacttgta  | ataccgaaac  | ctttacagtc  |
| 14881 | ttatcacact  | tagccttagt  | tacagtacca  | caaaaaacct  | tttttaggc   | tcttttcttc  |
| 14941 | tcttcttctt  | ttatttaaatg | tagttaaaaat | acgagctatg  | ctctttctta  | ttaaagctaaa |
| 15001 | acgcgaaata  | ttgttgcaact | ggcccagctt  | cttttgaaaa  | accaaattta  | caaactcttt  |
| 15061 | tctcaaattc  | acaagaattt  | catgcaattc  | ttgcgaggac  | ctcgattcaa  | tgtcagctat  |
| 15121 | atccattgca  | actccattta  | attatgatta  | gatacaaaat  | tacacttcat  | aggaagctta  |
| 15181 | gcagttgcct  | tttcaagcgc  | caatcttgct  | aaatgcatgg  | gaacatcact  | gctaatttca  |
| 15241 | aacaacattc  | taccgggctt  | agcttttaaat | acccaaaact  | caacactacc  | tttcccttta  |
| 15301 | cccatagcga  | catccgccgg  | ctttttacta  | acaggggtat  | caggaaaaat  | tcttatccac  |
| 15361 | actttaccag  | agcgttttta  | tgttctagat  | attacacgcc  | ttgcagtttc  | aatatgctta  |
| 15421 | gattgaatcc  | tacctgcttc  | catagccttt  | agaccataat  | ctccaaaaga  | taatgtgcta  |
| 15481 | ccacctttcg  | tgttaccctt  | aattcgtcct  | ttaaataact  | ttttatattt  | acttttttta  |
| 15541 | ggaataaaca  | tttcaatata  | cctaattagt  | taccaatata  | aaccagacc   | ttaaactcta  |
| 15601 | tgatgccata  | tatagttttt  | gcttcagcaa  | aagcataatc  | tatattagca  | cgtaaagtat  |

|       |             |             |             |             |             |             |
|-------|-------------|-------------|-------------|-------------|-------------|-------------|
| 15661 | gcaaaggcaa  | acggccttct  | ttataccact  | cagtacgagc  | tatctcagct  | ccgccaaggc  |
| 15721 | gcccagaaca  | acttacttta  | atacctctag  | cacccatcct  | caaacaactt  | tgaatagctt  |
| 15781 | ttttcatcgc  | tcttctaaat  | gaaacccttt  | tttctaactg  | ctgtgcaatg  | ctgtttgata  |
| 15841 | ttaaaactgc  | atctatttca  | gaccttttaa  | cccctactac  | attcacttcc  | acattatttt  |
| 15901 | ttactttttc  | agctatcttt  | tgctttatct  | tctcaatatc  | cgagcctttc  | ttacctatta  |
| 15961 | tcactccagg  | tctagaagaa  | tgtattatta  | cagataccaa  | atcgatcgta  | cgctctataa  |
| 16021 | ttacttttaga | aacaccagca  | tgcttaaaaag | attcattttat | ataactgcga  | atagataaat  |
| 16081 | cttgatgcaa  | cccttgttta  | taacccttct  | cagcatacca  | aatagatgac  | caagtattaa  |
| 16141 | ttattttttaa | cctaaatcct  | ttaggattaa  | cgtttcccat  | atttttgcac  | tttccttatt  |
| 16201 | aattttctat  | ttttatgaat  | catataattt  | cccccaatth  | tacagttata  | ttactataac  |
| 16261 | gtttactaac  | tctattagct  | ctacccatag  | cttttgga    | taccctacgc  | aaagtaagag  |
| 16321 | acttacctat  | taaaatttct  | tttatatata  | aattatcgat  | atccaatcca  | taattttgag  |
| 16381 | cattagcaat  | cgcagaatth  | aataccttcc  | ttataagacc  | tgcagctthc  | ttttcacaaa  |
| 16441 | atcttaattg  | cacagtggca  | aaagaaactt  | ttttattacg  | tactaaacca  | gcaaccaa    |
| 16501 | tcaattttacg | aggagttagat | tttaaaaccc  | tagaaccagc  | tttaactatt  | acatctctgt  |
| 16561 | ttttcatatc  | aattaccttc  | ttgtcgcctt  | tttatcacca  | ctatgccag   | taaatttacg  |
| 16621 | agtgggtgaa  | aactcaccaa  | acttatgacc  | tatcatattc  | tgatcattaa  | cattcacagg  |
| 16681 | aatgtaatcc  | ttaccattat  | aaacagcaaa  | ctttaaacct  | aaacaattag  | gaagaattac  |
| 16741 | agaagccctg  | gaatgaactt  | ttatagccat  | gttaacaaac  | cccttgttta  | aagcattatt  |
| 16801 | caccgactth  | aatatagaag  | gatgacaaaa  | aggaggcttc  | catgcagatc  | tactcataaa  |
| 16861 | ctaaccctth  | aattgtttta  | tatacttatt  | actagattta  | tttctccttc  | gagttttctt  |
| 16921 | tccttttggt  | gcaacacccc  | aaggagtaac  | aggatgacga  | ccaccagagg  | tttttccttc  |
| 16981 | cccgctcca   | tgaggatggt  | caaccggatt  | cattgcaact  | ccacgtacag  | taggtcta    |
| 17041 | ccaagccac   | ctacttctcc  | cagctttacc  | caactttcta  | ttcttatggt  | cagggttaga  |
| 17101 | tactacacca  | atagtagcct  | tgcaagaaga  | taaaatcaac  | ctaatttgac  | cagacctgag  |
| 17161 | tcgtaataaa  | acatattggc  | catcacgacc  | aacgatttgt  | gcataacaac  | cagcagctct  |
| 17221 | agcaatcgca  | gcaccattac  | ctggcttcag  | ctcaacatta  | tgaacgaaag  | aaccaacagg  |
| 17281 | tatatgcttg  | agtagtaa    | aattccctgg  | caaaatatca  | gcatcattcc  | cagctgtaac  |
| 17341 | aacatcacct  | ggcttcatac  | cttgaggagc  | taatatataa  | gacttaatat  | catcttcctt  |
| 17401 | atatgatatt  | aacgccaaaa  | acccacttct  | atthgggtca  | tactctatth  | tttcaactat  |
| 17461 | accttgacca  | cttctattac  | gcttaaaatc  | tatcactcta  | tacttcttht  | tgtgaccacc  |
| 17521 | accctatga   | cgagttgtaa  | ttctaccatg  | attatthtct  | ccaccactgg  | actthttacc  |
| 17581 | ggatgtaaga  | gactthtctg  | gctcatctth  | tgataaaacca | actthtactta | ctaacacagt  |
| 17641 | cccacgagaa  | gacggagtaa  | caggattaaa  | aaatthcata  | cccatactaa  | acgctcatta  |
| 17701 | tatctaatht  | ttgaccatcc  | atcaaagaaa  | aataaaactth | ctthttctgt  | ttttcacaa   |
| 17761 | caatcacacc  | cctaaaacgc  | ctatathttag | gcttaathtct | aacaacatht  | atagaagaaa  |
| 17821 | ttttaacatc  | aaatagagac  | tctattgcca  | actthathttg | acgctthatht | acathttacaa |
| 17881 | aaacatacaa  | agaathattta | ttaaacttct  | ccctcaaaaa  | agaggccttht | tctgtaatta  |
| 17941 | taggagatht  | tattatatta  | ttatathttga | tcataacaat  | ctaccttcaa  | gatgctthta  |
| 18001 | agtatcctth  | gtcaacatca  | cgcattcgtg  | attcaatata  | tcaaaaacat  | ttaaccaat   |
| 18061 | aggthtgatt  | aagtctacat  | agtgaagtt   | tttagccgca  | cgcaacaaat  | catctccata  |
| 18121 | atcaccaact  | atcaaaaagg  | aagaaaatht  | aaaathttta  | atacathttac | acathttcaga |
| 18181 | cgthttcttc  | acatcaatath | ttaaathattc | cagaataath  | acttgattath | ttaaathactt |
| 18241 | tagagataaa  | gcaathttta  | aaccaaatht  | gcgtaccttc  | ttattaagag  | aataagtatg  |
| 18301 | actctcaca   | acagggccga  | aaataatccc  | accacctcta  | aattgaggag  | atcgcaagct  |
| 18361 | cccttgtctt  | gccctaccgg  | tacgtthtttg | atcataagggt | ttagctgttg  | taccagagac  |
| 18421 | atcactaata  | cctthttgtth | tatgagtacc  | agctcttctc  | ttcgctaat   | gccatctcac  |
| 18481 | tatatcatgc  | aaaathactca | atthttgtct  | agcagaaaat  | atcaaaggat  | tgagctgagc  |
| 18541 | agtacctaca  | ttatcattag  | atagattaac  | taaathacat  | tccataacta  | acttaccaaa  |
| 18601 | ttactagcat  | catcathttac | atctaacagt  | aaacctaccg  | gaaaagggaac | atctthtatgt |
| 18661 | aaagathttth | taactgcath  | tcttacaaaa  | acataggaat  | ttthaaaccc  | aggaacatta  |
| 18721 | ttacccttca  | cagcaathtat | actathtttca | tgatcaatgg  | ataathatctt | catathttgt  |
| 18781 | gcagttatcc  | tgctgttacc  | taaatgacca  | gccathttct  | ttcctthtgaa | tactctacca  |
| 18841 | ggatcctgac  | attggccagt  | ggaaccttgt  | gatctgtgag  | caatagaaac  | accatgagat  |
| 18901 | gccctaagcc  | cactgaaath  | atgccgcttc  | atcacaccag  | caaatcctth  | acctatagaa  |
| 18961 | taaccgcgtaa | tatcaagata  | ttgaccaacc  | acaaaatgat  | tgattcccac  | ttthttacca  |
| 19021 | cattctatth  | ccgacaggtc  | atthaatcta  | ctthcgtata  | acttacatht  | attathttata |
| 19081 | ccctthttct  | ttaaathattc | caactgagggt | tttgctatath | ttthaaaatc  | tcctgtgcct  |
| 19141 | aaaatgactg  | aattatagcc  | acathttatct | tgctcctthta | tatcaataath | ataagthttcg |
| 19201 | ctgagatgca  | ataaagttac  | agccatgcga  | ctattgtcag  | aatacatagc  | agtatgacca  |

|       |             |             |             |             |              |             |
|-------|-------------|-------------|-------------|-------------|--------------|-------------|
| 19261 | atattcatca  | ttagtaaacc  | aattctctctc | agcgaattta  | ttctcttcat   | ttccttctcc  |
| 19321 | taaaccttaa  | cttccttgac  | ttttaaatcc  | acttctacgc  | cagcagaaaa   | agataaacct  |
| 19381 | gtaagcatct  | gcatacatgt  | aggagtaaga  | tcatgtaaaa  | caatcaaacg   | cctagaagtt  |
| 19441 | ctcatttcaa  | actgttcacg  | agatttttta  | tcaacgtgag  | gagatctatt   | aacaataaat  |
| 19501 | ttagaatctt  | tccttggtcaa | cgcaatcgga  | ccagataatt  | ttgcaactgga  | ccgctttaat  |
| 19561 | tcatcaacaa  | attttcgaac  | acactcctcc  | aataaagaac  | aatcgaaagc   | cttaatgtta  |
| 19621 | atatatatat  | cttgcttcat  | cttagttact  | acactcactc  | caaaatttca   | gaaacaacac  |
| 19681 | cagaaccaac  | agttctaccg  | ccttctctta  | tcgcaaaacg  | caatccctta   | tccattgcta  |
| 19741 | tcggtacttg  | caattctact  | tctacactca  | cattatctcc  | tggcattacc   | atctccttcc  |
| 19801 | catctagcaa  | ttttatgctc  | ccagttacat  | ccgttgctct  | taaataaaac   | tgtggctggg  |
| 19861 | aattcgcaaa  | aaatggtgta  | tgccttctctc | cttctctttt  | ctttaatatata | taaacctccg  |
| 19921 | ccttaaaactt | tctatgcggt  | gttatcgctcc | ccggtttcgc  | taatacttgc   | cctctctcca  |
| 19981 | cttcttctct  | ttttgttctt  | cttaacaata  | ttcctacatt  | gagtcctgca   | cttcccttat  |
| 20041 | ccagcaactt  | cttaaacatc  | tcaacacctg  | tgcataatcg  | cttttgctgc   | gctttcagac  |
| 20101 | ctattatctc  | tatctcttct  | cccgtcttta  | tctctccctt  | ctctattctt   | cctgttacca  |
| 20161 | ctgttctctg  | ccccgatatc  | gaaaatacat  | cttcgattgg  | caataaaaaat  | ggtaaatcca  |
| 20221 | caggccttgg  | tgggaaccgct | acataattcat | ctaacttttc  | catcaatttg   | tctattgatt  |
| 20281 | tctttccata  | ttcgctgctg  | tcctcctcca  | gcgccttgag  | cgctgaacca   | accaccacag  |
| 20341 | gcacttcac   | ccctggaaat  | ccgtattttac | tcagtaattc  | cctcacttcc   | atcttacta   |
| 20401 | aatctatcat  | atcagtatca  | gcaacatcag  | ctttatttat  | atacaccacg   | atatatccaa  |
| 20461 | cacctacctg  | cttcgccagc  | aatatatgct  | ctctcgtttg  | tggcattggc   | ccatcaaccc  |
| 20521 | ccgacactac  | caatatcgcc  | gcataccatct | gtgctgcacc  | tactatcatg   | ttctttacat  |
| 20581 | agtcagcgtg  | tccaggacaa  | tcaacgtgtg  | cataatgcct  | tttttccgct   | tgataactcaa |
| 20641 | catgcgctgt  | tgctatcggt  | atccccctct  | tcctttcttc  | tggcgcttta   | tctatctgat  |
| 20701 | cgtacgctac  | aaaatttcca  | taatgcttcg  | ttatcgccgc  | tgtaaacgct   | gtcttcccat  |
| 20761 | gatccacatg  | tcctattggt  | cccacattta  | catgcggctt  | tccaaatgct   | tccactattg  |
| 20821 | ctgtcataat  | ttaaactttt  | ctacctaaaa  | tacaaataca  | tcaataaata   | atatgttgat  |
| 20881 | tttataaaaa  | tacaacaaaa  | aaaagagcgg  | atagtgggaa  | tcgaaccac    | gtcactagct  |
| 20941 | tgggaaggcta | gagctctacc  | attgagctat  | acccgcacaa  | tggaggagggt  | aggattcgaa  |
| 21001 | cctacgtacg  | ctcacgcgga  | cagattttaca | gtctgttacc  | tttaaccact   | cgggtcactcc |
| 21061 | tccgcaaaaa  | tttggttaaga | gaatactatt  | ttagcatctt  | aacttaagct   | cttattgtat  |
| 21121 | ttaataactaa | acgcctaaaa  | ttaaaaaatc  | aagcaataaaa | acctaccctg   | attaaaaatca |
| 21181 | cgcagatttc  | atttttatata | acacaatatt  | gtcaataaaaa | cgttttaaaca  | aataatgcga  |
| 21241 | atcatgcgta  | cctggcgctt  | cttctgggatg | gtattgcaca  | gaaaagactg   | ggtaatcctt  |
| 21301 | catcattatt  | ccctctacac  | tattatcaaa  | tagagaaatg  | tgagtaattt   | caacattact  |
| 21361 | tagaagagaa  | gctgaatcaa  | caacgaaacc  | atgatttttg  | ctagtgatct   | caacttttcc  |
| 21421 | actaattaca  | tcataaaactg | gatggttact  | ccctcggtga  | cctatatcca   | tcttgatggg  |
| 21481 | ctttgcccc   | aaagtaatcg  | caagtaattg  | atggcccatg  | catatgccaa   | aaattggtat  |
| 21541 | tttagatttt  | ataataatgt  | ctattttctga | aactacactt  | tctcctattt   | cttgcggtac  |
| 21601 | accaggacca  | tttgaaagca  | ctatcccatc  | tggattcata  | ctcaacactt   | tttgagcaaa  |
| 21661 | acctgtgctt  | ggtctgatta  | attcaactgt  | acaaccaagt  | tctattaagc   | gtgaaactat  |
| 21721 | actgattttt  | acgccaaaaat | caacgattac  | aaccctatat  | tttgcattaa   | gggtcactttt |
| 21781 | aaaattacta  | tgcaagctga  | ctttattggg  | tatttctatc  | ccattttacag  | atgtgtattc  |
| 21841 | cttcaatttg  | tccaacgcac  | gcgccttact  | cgatgagcat  | atcattccat   | tttgagatcc  |
| 21901 | atgttctctc  | aaatgtctcg  | ttaaagctct  | agtatcaact  | cctgatatacc  | caatcacgtt  |
| 21961 | atttttctct  | aaccaatcat  | ttaaactgat  | atatgaagaa  | gggtgggaca   | tagaagaaag  |
| 22021 | ttcacgcata  | accacaccac  | ttgcaaaaaat | tttctttcct  | tcattatcct   | tatggtttat  |
| 22081 | tccaacgtta  | ccaatatgag  | gaaaagtga   | cgttataatt  | tgatcggcaa   | aagaaggatc  |
| 22141 | agttatagta  | tgctgataac  | cggtcatacc  | agtggtaaaa  | cagacctcac   | ctatgcattt  |
| 22201 | gcctttttta  | cctactgatt  | ttccccaaaa  | gcacttgcca  | tcttgtaaaa   | ttaaaactgc  |
| 22261 | gtcctgcact  | tcattatcta  | tttaactgat  | tcaaaacagt  | atacaagaat   | ttcaataaat  |
| 22321 | acgtaactct  | ttctaaaaat  | ccaaatttaa  | ccacgaagca  | gcaaaaaata   | acatgaaaaa  |
| 22381 | cttttaatac  | aatctttcat  | ataaaatata  | tagttgacta  | ccttcatatt   | tcgtattata  |
| 22441 | tataggtaaa  | tcataagtaa  | agtggagggt  | aataatgaac  | actggtacaa   | atcaatcaaa  |
| 22501 | aaaaataaat  | gagaagtggg  | tagctggagg  | aattggcgcg  | ctattatttg   | taatgatgct  |
| 22561 | accgtcgatt  | cttctttttg  | caaaaatagc  | tatagggtta  | attatgggtt   | cagttgcagc  |
| 22621 | aatagcgata  | aaagttgcct  | taaaaacaat  | atcgaatgct  | ttagaggata   | aacaggcaga  |
| 22681 | tcaaagccaa  | gcgacgcaac  | aaacaacaca  | aagtaaaaat  | ataaacctgg   | ctattggatt  |
| 22741 | aacatctata  | ttcgtaggag  | gattattact  | attcattata  | gcacaaactg   | gcttaattgc  |
| 22801 | agcatgtgca  | gctataactg  | ctttagctct  | acacgaatat  | gttaaaaaatc  | aagaaatagg  |

|       |             |             |            |             |             |             |
|-------|-------------|-------------|------------|-------------|-------------|-------------|
| 22861 | aaaagagata  | aatgataaat  | tcgataaggt | agctgacgat  | acaatcaatt  | ttattgttag  |
| 22921 | cagtgttgaa  | aaacttattc  | caacaaagcc | gccaggcata  | acagcctaaa  | ctgtctccgt  |
| 22981 | tcagggcata  | agtgttacaa  | gtagcattat | ataaagcgat  | taatggcatc  | ctcctgataa  |
| 23041 | tagaataatt  | gtatctgttc  | aggggcatcg | caaataattga | agcaaaagtg  | gtcagtgttt  |
| 23101 | actatacgaa  | tattgtgatt  | tgaatccact | agggaggatg  | tcatcccagt  | gcccagacac  |
| 23161 | tgggatccag  | gaattttgat  | tagagattaa | attggtgagt  | ataaaaagtag | ctaatacctac |
| 23221 | gttaaaatac  | aacgttttta  | atgggactgc | gtaaaagggc  | tggattccag  | tgtcaagcac  |
| 23281 | tggaatgaca  | cctttgtgtt  | tgaggcaaaa | cctgctataa  | catttcttcg  | caaacaaacg  |
| 23341 | ttcgtacagt  | tatgtatcag  | ctactttcat | ggcaccattt  | gttgtaaact  | cacatttctc  |
| 23401 | tatgattatc  | tttatttgcc  | gctttcccga | acggatgctc  | tacagttatt  | tcctcattaa  |
| 23461 | tagagcgagg  | tgcaccgga   | ccaggtacaa | cgatattctc  | gtgcgattgc  | atatccttct  |
| 23521 | tttcctcaca  | tgggtgtttg  | ttaatgaaac | gtgctgctaa  | aacttcatgt  | aaagctttac  |
| 23581 | cttttataag  | cacagcctcg  | ttttgcttag | ctaactctaa  | aattttcttt  | ggttcaacat  |
| 23641 | ctttaccgtc  | aatagttgat  | tttttaatac | taacttgacc  | taaatttata  | tttagaacia  |
| 23701 | cagtacagtt  | aaggctcttt  | ccagattcat | cttttgcacc  | ccaactaatt  | tcgatgtcac  |
| 23761 | atattgcaaa  | ttttgtaaag  | gagtagttcc | tctgttgttt  | ctcattcttc  | tcaattgtta  |
| 23821 | ctattctttc  | accattgctg  | tatatTTTTg | ctctttttac  | ctcgcttttc  | tcttcttcca  |
| 23881 | ttcttttagt  | tttttcagt   | aaaagacgac | tggtttctaa  | actttgttca  | ggtttagtaa  |
| 23941 | tgttgatatt  | aagatggtca  | taatgattaa | gaagacgggt  | tgcataatga  | catggcacat  |
| 24001 | aacacccatc  | aaagaaagca  | attgcactac | cagtttttag  | aaattcttgt  | ccatcgctca  |
| 24061 | ttccttcacc  | aattcgaata  | agatatctac | ccaacctctt  | tttaaaattt  | tcttttaact  |
| 24121 | cctcctgatc  | tttagaagta  | agcttcttat | ccaatatacc  | cattatttct  | tttcgcttac  |
| 24181 | tcaataccac  | ataattgaaa  | aggaaaatat | catcctctcg  | ataataattt  | gctatcttgt  |
| 24241 | caaattggatc | tgccggccaa  | ccgttattat | aatttacaga  | atcagaagaa  | tcttcacact  |
| 24301 | tattatcctt  | aaaatcaaaa  | ttcaatcttt | caaaatctga  | taatactttt  | tctgccctat  |
| 24361 | cttcaaaaaga | ccgaagtcca  | tcttgaagtt | cttttccata  | actcattcct  | ttgtcaattt  |
| 24421 | gaagaacata  | ttgaccatat  | ttctttctaa | actcctcctg  | ttcttcgagg  | agaggaagat  |
| 24481 | tcctatctaa  | tatatcgatt  | atttctttcc | gcttattcaa  | tattacatag  | ttaaaaaggg  |
| 24541 | cactctcccc  | cttcttttca  | taatcgtctg | ctattttgtc  | aaaacactta  | ttatccttaa  |
| 24601 | actccaattc  | ctcaaaatct  | gagagcacac | tttgtacctg  | agtctcatcg  | aattgaagat  |
| 24661 | ttgcttgagg  | agatagaaga  | gtcaactttt | cttcactttc  | cttggtactc  | gaatttttga  |
| 24721 | aaaaaccatt  | caatagattt  | acaatactag | aaaacatttc  | acacctctat  | tgttataagt  |
| 24781 | aaacttaatt  | atatcttaat  | gctaaatggt | gtaaagctaa  | aattagaac   | taaaaaagct  |
| 24841 | aacataagtt  | ctgcattggt  | tgcagcttta | tcagggtgtt  | aggtagaatt  | attaaagaac  |
| 24901 | tagttgaaca  | tatgttatca  | actccatcca | caagttctcc  | gcttggtact  | ccagttgcaa  |
| 24961 | tgaacactga  | ttcacctctt  | gccatatctt | ttacggcgta  | gactttttct  | gggtcatcaa  |
| 25021 | tattttaaatt | ttttgctctt  | tcttttaact | gatctgtgtc  | aaatatcaat  | cttccctcca  |
| 25081 | tctgcccacc  | gattgaactc  | agcgctgcag | ccgcaagcac  | cccttctggg  | gcccctccta  |
| 25141 | ttccgatata  | catatcatga  | ttgccattta | ctagtgaac   | tacggccaca  | atatcaccat  |
| 25201 | catctattag  | tttaattttt  | gctcctaact | tcctgatttt  | tactattaat  | tcattgtgcc  |
| 25261 | tttcacgatt  | aagtatatgt  | accacgagat | cattttacttt | gcattttttt  | gccttggtta  |
| 25321 | aattgtctag  | attcttttca  | atgctatttt | ttagtgtgac  | tacaccctct  | ggaagatttt  |
| 25381 | ttcctaccgc  | tattttttcc  | atataaacat | caggtgcatg  | taaaaaatta  | ccttttttctg |
| 25441 | ttgcagcaag  | aacagacatt  | gcccctgggt | tgtaatgagc  | acaaatcgta  | gtgccctcaa  |
| 25501 | gtgggtcaac  | ggcaatgtcg  | atttcaggac | catttccagt  | gccaaccttc  | tcgccaatat  |
| 25561 | atagcatcgg  | tgttcatctt  | ctctcacctt | caccaattac  | gatagtacca  | tttatttcca  |
| 25621 | ttgaatttaa  | tactgtacgc  | attgcatcaa | ctgcaacctg  | atcagccttt  | ttttcatcgc  |
| 25681 | cgaagcctgc  | tagttttatat | gcagcaagcg | ccgcagcttc  | ggtcacttta  | actaatttat  |
| 25741 | aggctaaatc  | ttccatcatt  | tgttttaaga | actataattca | atatgtatca  | tgatataatca |
| 25801 | tgctgcttga  | aactgcaata  | tgtcttgact | gattattagg  | gagttgatat  | aatataagca  |
| 25861 | ttatagtagt  | gggattatag  | ttatggcata | tagtgatgat  | gatgttagaa  | atttctatct  |
| 25921 | agatatagat  | agaattacag  | gacgtgataa | cacagttact  | agtttggaag  | aactaaaaaa  |
| 25981 | gaggtttaagg | aaagaagtta  | attttcaaga | tgaatgtgaa  | ggaggcaatt  | cattagggaa  |
| 26041 | cctacttcta  | aaacatgcaa  | ccgaaaataa | caaccacgc   | gttaaggatt  | ttctcctcca  |
| 26101 | aatgggtgt   | gaaccccttc  | aacaagagca | aataaccgca  | gcaataaaca  | aggaagaaga  |
| 26161 | ggcaccta    | gtggaagaga  | atagagcaga | cagtaatgaa  | gtagattcta  | gtaacttcat  |
| 26221 | aaacccctgg  | atgactgctg  | aagtacttta | cgagcaacta  | atacaaggga  | aagaaacaaa  |
| 26281 | tctggcaatt  | tttgactcgt  | ttgcaaagtc | tgtaaagagag | tccaatatta  | ccggcgatcg  |
| 26341 | tggcatat    | ctagatgttg  | taaaattgtt | tacagattta  | gatgctgtaa  | tccatcttac  |
| 26401 | agatactgct  | tccagaacta  | tattgggcat | agctacaata  | acaaaacaag  | ctgacgttgt  |

|       |             |             |             |             |             |             |
|-------|-------------|-------------|-------------|-------------|-------------|-------------|
| 26461 | taaggtactt  | ttggatagtg  | gcaaatttta  | tgaagaagaa  | aaatttaacg  | ctctgtgtct  |
| 26521 | tgctattact  | caggataatg  | cccaagaagc  | tgagctaatt  | ttaggttacg  | tgagtcctgc  |
| 26581 | aaacaggaaa  | taggctttac  | aagtggccat  | acaggtaggt  | aaaactgaaa  | ttgttaatgc  |
| 26641 | gttcttgaat  | agaggtaagc  | ttaatgaaga  | aatatagagc  | gaaccagca   | gcagtaatgg  |
| 26701 | aaacattggg  | agtagacctg  | tagcaacagt  | gcctccagtt  | agtactaatg  | gtgataatcg  |
| 26761 | caatcacgac  | aatgaaatac  | ctgtagtaac  | agagactaac  | caaactacca  | cgccaaatag  |
| 26821 | tgataatggt  | aatggccaat  | caaatacata  | taacaaaaat  | aaaacgcctg  | taataaccaga |
| 26881 | ggctaagcaa  | actgccacac  | caaataatga  | taataaagct  | aacggctttg  | tagatgctca  |
| 26941 | attttctgtg  | ccaaatgaaa  | aagaagctaa  | atataaaaaa  | agcaaggaaa  | atttttacac  |
| 27001 | ctcattaaca  | aaagatgttg  | ttggagttgt  | tattacagga  | ttattcatta  | ctgctgctgt  |
| 27061 | gatgggtcca  | tttgtaactg  | gtgcagtgat  | ttgtgggtgt  | atagctgctt  | tgggtgcaat  |
| 27121 | agctaccggg  | ttgcatgtaa  | aaaattctac  | attaccaagc  | tatagagaaa  | tgggaagaaa  |
| 27181 | taaagttgaa  | cacgtccaaa  | aaactgcaaa  | aacgttgtga  | ttcaatttcg  | ctagggagga  |
| 27241 | tgttatgcca  | gtgcgtgaca  | ctggcatcta  | atttaccaa   | cacacttaga  | ttttatgcta  |
| 27301 | aactgtgctg  | ccactaactt  | tgcaaccggt  | actctatagg  | gtgagcatga  | aacataatcc  |
| 27361 | acccttgatt  | cgatgagaaa  | ctctatagat  | tttggatctg  | ctccatgctc  | tccacatata  |
| 27421 | cccagtttta  | tttcttttcg  | ggtttttttg  | cctctttcaa  | tggccatctt  | gattaactcc  |
| 27481 | cctaccctt   | cgatgtccag  | cacttcaa    | gggtcgtttt  | cgaatatgtt  | gctttcctta  |
| 27541 | taagaatcga  | ggaaattaac  | tgaatcatct  | cttgaaagtc  | ccatgggtgt  | ttgcgttaaa  |
| 27601 | tcattagtgc  | caaaactaaa  | gaactctgca  | tgttttgcta  | acttatcagc  | aatcagtgtc  |
| 27661 | gctcgtggta  | gctctatcat  | tgttccaatt  | gagtacgcct  | tgtctgatgt  | cattccagcg  |
| 27721 | cgtgacgctg  | gaatctgctt  | cttgatccta  | gctgagatga  | cagaggattc  | tttcttctact |
| 27781 | aactcgcata  | tcaaaacaaa  | ctctttctca  | ttcatgataa  | aggggaccat  | gatttcaggc  |
| 27841 | tccacttcta  | tcttcttttc  | tttctttaat  | tcacttgca   | cactaagtat  | tgccctaata  |
| 27901 | tgcatgctat  | atatttcagg  | atgagaaatg  | gcaagtctac  | aacctcgatg  | gccaagcatt  |
| 27961 | gggttctttt  | ctgataactg  | tgctatttta  | ttttttactg  | attcaactga  | cttactaagt  |
| 28021 | gatttggcga  | ttttttctat  | agtagactga  | ttattgggta  | aaaattcatg  | caaagtgga   |
| 28081 | tcaagcaacc  | gtatagtga   | ctccctgccc  | tccataatag  | aaaatatattc | tttgaaatca  |
| 28141 | gacttttgca  | tttcttccag  | tttaatgagc  | gcatttgccc  | tttcatttttc | atcgtcagcc  |
| 28201 | attatcaact  | tttgaatgaa  | ttcgattcta  | tcactagcga  | aaaacatatg  | ttctgtgcga  |
| 28261 | cataagccta  | taccttctgc  | accgaattct  | tttgcaattt  | ttgcgtcttt  | tggagtatca  |
| 28321 | gcgttcgctc  | tcactttgac  | cgttttgatt  | tcatctatcc  | agttgattat  | cgttttgaa   |
| 28381 | tcttgcgata  | attcaggtga  | aattgtagga  | agaatgccaa  | gcataacctc  | ccctgttcc   |
| 28441 | ccgttgatgg  | taattgggtc  | acctttat    | acttttgat   | ccccacaga   | aaagaaagtt  |
| 28501 | ccatctttat  | cgatataaa   | tccacttaca  | ctgcaaatgc  | atggcttacc  | cattccacgg  |
| 28561 | gttacaacag  | cagcgtgcga  | ggcatccct   | ccccgtgctg  | ttactatgcc  | acttgcagca  |
| 28621 | ttcattccat  | taatatcttc  | aggactcggt  | tctgacctta  | ctaaaatcac  | ttttttaccc  |
| 28681 | tgctctgcag  | ctttttcagc  | atcacttgca  | ctaaacacta  | catatccaga  | agcaaccctt  |
| 28741 | ggagaagccg  | gcagtccctt  | ccctattact  | ttttgggtcac | tcttaacgct  | aagaactgga  |
| 28801 | tgcaataaat  | tgtcaaaaagt | ttttggatca  | attctcaata  | ttccttcttc  | ttttgtaatc  |
| 28861 | gttccttcgt  | ttaccatatc  | aactattatg  | cgaatagcag  | cttcagccgt  | gcgcttgcca  |
| 28921 | gacctagtct  | gcaaaatcca  | taattttaccg | tctgtacag   | taaattcgat  | atcctgcatg  |
| 28981 | tctttataat  | gcctttcaag  | tttttcacat  | accgcgcata  | attccaggta  | gacacttggc  |
| 29041 | agcaacttct  | ccatgggtgt  | tttttgctct  | ccgtcaattg  | gcataggagt  | ataaacacca  |
| 29101 | gaaaccacat  | cctcaccctg  | agcattaacc  | aaaaactcac  | caaaaagctt  | tttttcccca  |
| 29161 | gttgaaggat  | ttcgtgtaaa  | tatcacacca  | gttgcagaat  | tatcatttaa  | attacaaaaa  |
| 29221 | accattgctt  | gcacgttgac  | cgctgttcca  | aggttttcag  | gaatattatg  | tatttttcta  |
| 29281 | taggaaacag  | ccctatcatt  | tttccaagaa  | gcaaaactg   | cattaactga  | gtttaacaat  |
| 29341 | tgctcttcaa  | cgttctgcgg  | gaaatgtttc  | tcagtttttt  | catatactat  | ctttttaaaa  |
| 29401 | tcgttaacaa  | ttctctttaa  | aacatcaaca  | tcaagatcag  | ctaagctttt  | tgctccactc  |
| 29461 | ttttgctgct  | cattatcaat  | aacatcttga  | aataggtgat  | gatcaagctg  | tagtacaaca  |
| 29521 | ttggagtaca  | tcatgatgaa  | acggcagtag  | ctatcgtaag  | caaaacgttc  | gccacttttt  |
| 29581 | tttgcaagcc  | caacaacggt  | ttcatcattt  | agaccaacat  | ttaaaatagt  | atcaagcatg  |
| 29641 | cccggcattg  | aactaacact  | accagagcgt  | atggaaaatta | ataagggatt  | atttaaatecc |
| 29701 | ccaaattttac | aaccgatgtc  | attttctgagc | atcgtcatgt  | agttttttaa  | tccactacat  |
| 29761 | atgtcattcc  | agtgcgtgac  | cacatttttt  | tctggatccg  | agtaatcaga  | tacttggatg  |
| 29821 | acagaagatc  | tattgtcttg  | ataatagact  | ttgcaagcag  | agggtggaat  | tgtgaaacca  |
| 29881 | ggtggaacag  | gaatgccaac  | attgcacatt  | tctgctaaat  | ttgccccctt  | tcctcccagc  |
| 29941 | agattttttca | tttctgcatt  | gccttcgcatt | ttaccctggc  | taaagtaatg  | tattaaacttt |
| 30001 | tcccccatca  | ttttctccgg  | attttctactg | ataaacacat  | tgtacatata  | gttccaataa  |

|       |             |             |             |             |             |             |
|-------|-------------|-------------|-------------|-------------|-------------|-------------|
| 30061 | acctgtgaga  | acttgaaacc  | ttaggataat  | aaatTTTtaca | aaatTTTtgca | acaacgttcc  |
| 30121 | ctctggcaac  | atcagtaaag  | ttacaaaaa   | agatgacaaa  | ttattgaatt  | attatcaata  |
| 30181 | agaatatata  | atataaagat  | acatttaaaa  | atTTTTttat  | ggctctttct  | aagtttctcg  |
| 30241 | accccaagaa  | tgatgttgcg  | tttcggcgta  | TTTTtggtac  | tgaaaaaaat  | aaagacatcc  |
| 30301 | tcattcactt  | tctcaatgat  | atTTTggggT  | tacttgGcaa  | agatgaaata  | aaagaaatag  |
| 30361 | aattcctcag  | cactattcaa  | gatgctgaaa  | ttgcctctaa  | aaaacaaagt  | atcgTtgatg  |
| 30421 | ttctTTtgca  | ggatgaaaat  | ggggtgcaag  | taatagtcga  | aatgcaagtt  | gccaaaacta  |
| 30481 | aaggctTTtg  | aaaacgcgct  | caatattacg  | ctgctaaagc  | ttattcaagg  | caagctgata  |
| 30541 | aaggTgatca  | atatcagggt  | cttaaagaaa  | tcattTTttat | agctattgct  | gattgtattc  |
| 30601 | tctttcctaa  | taaatctgag  | tataagtcag  | atcatgtaat  | gttagacaaa  | gatagctatg  |
| 30661 | aacatgattt  | aaaagatttt  | tattttacat  | ttattgagtt  | acaaaaattt  | cctaaaaacta |
| 30721 | aagaagacca  | attggagagt  | atagTtgaaa  | aatggatcta  | ttattTTtaaa | tatgcagatg  |
| 30781 | aaactagcga  | agaagaattg  | gaaaagataa  | taggtagtga  | tgtaataatt  | aaaaaggcat  |
| 30841 | atgaagaact  | aaatagattc  | aactggTcag  | agaaagaatt  | tattgcctac  | gaacaggaaa  |
| 30901 | taaaacgtat  | tcgtgatgaa  | cgggctgttc  | ttgaacaaaa  | acttgatgat  | gctaaaaagg  |
| 30961 | aaggaaaaat  | tgaagTtgca  | aaaacaatgc  | tagctaataa  | tgTtgatgtc  | accactattg  |
| 31021 | ttagTtttac  | tggcctctcc  | atgagtgaga  | tcaaagaatt  | gcagaattaa  | gtggaccgcg  |
| 31081 | aaacggTtac  | acgaaataat  | gctgcagcct  | gaccagatga  | taagtacatt  | tagcctattt  |
| 31141 | atctTTtata  | tttcatgtca  | atTTTataaa  | tcaaatTTtat | ttctgtgagt  | agctacaatt  |
| 31201 | taaagacctt  | gcttcatcaa  | tgtaatggaa  | caaaaccttt  | ttagtaagtt  | caaaaccctc  |
| 31261 | taaagtctct  | ccttcgcac   | ttgctgtaat  | gcagTtttgc  | gtattTtgata | ccctaagaag  |
| 31321 | ccaccaacct  | ttattatcgg  | ttaccttaac  | accatcaaga  | tctgaaaata  | caatattTtg  |
| 31381 | ctgctccagt  | gtTttcttTa  | ttgactcaat  | tattTgaaac  | TTTTtctcat  | ctttcactac  |
| 31441 | aatctTcact  | tcatgagtga  | tatataactt  | cggtaaatcc  | tcaatcacct  | gagataggct  |
| 31501 | ttggTttttc  | ttaaGcaaaa  | tgtcaactgc  | TTtaacagca  | gaatatagcc  | catcatcaaa  |
| 31561 | acttagctca  | gaaaagaaga  | agtgcCCgct  | taattcacca  | gcaaactTtg  | cctcttcctc  |
| 31621 | taccatcttc  | ttcttaacta  | gtgaatgtcc  | agtagcacag  | gtgataactt  | gccctcctaa  |
| 31681 | cttgctaaca  | aaatcatgca  | ctttcatact  | cattTTttacg | ttagcaataa  | ctTtgctttc  |
| 31741 | tggatattcc  | tccaacactt  | cacgtgcaaa  | aattataaat  | aaatggTcat  | tggaaacaac  |
| 31801 | gtTgcctTTa  | ttatcaatta  | agcgcaccct  | atcgctatcg  | ccatctagcg  | caatgccaaG  |
| 31861 | atcacatcca  | tattccttca  | caatgtcaat  | taattgagca  | agattTTTTt  | cctctatggg  |
| 31921 | atctggatca  | tgCagtggaa  | atgccccatc  | tatagagtta  | ttggTtacga  | tgtgcgTatg  |
| 31981 | accaggcaag  | atctTTTcaa  | tataccttat  | aattccactt  | gctggactat  | ttccacaatc  |
| 32041 | ccaggctatt  | TTtaattTct  | gtgtagtatt  | attctTcact  | gcactTTTca  | atatgctaatt |
| 32101 | gtactcacta  | tatatattTt  | tgTtaattaa  | gcttccaatt  | cttgtgctgt  | TTTTaattgg  |
| 32161 | actgcttata  | atttccttca  | tttcttgatc  | tgagaagact  | TTTTtattac  | taaaaaattt  |
| 32221 | aaagccatta  | tattcgctgg  | ggTtatgaga  | ggcagTtatt  | atgataccaa  | gatccgcctg  |
| 32281 | tgtgattTgt  | gtTgcagcgt  | aaagcatagg  | tgaagagcat  | agtccaacgc  | gtataacatt  |
| 32341 | tgcaccggat  | aaagttaagc  | ccctaattaa  | ttctctTttct | atacctggTg  | aatctattct  |
| 32401 | gctgtcgtag  | ccgacacaaa  | cactagctac  | ggTttggcca  | aactTTctac  | ctatctcgta  |
| 32461 | cccatcatta  | atctgcaaat  | ctTtgccctac | tatacctcta  | atatcgTatt  | ttcttataat  |
| 32521 | ggTattgtcc  | atactgtact  | tcttgaagtg  | actactatat  | aacattTTtg  | ccaaatgctc  |
| 32581 | aagTttattt  | atccaacaat  | tagTtgactc  | TTtaaagaaa  | tctgttaata  | ttatagtata  |
| 32641 | TTTTTTaaaa  | tgTaaaatta  | tgccacagga  | aaacgaaaat  | gtattTtatag | ctgaaagtca  |
| 32701 | aagTtttagat | gtagatgaac  | agcagaaaaa  | ggatattTTa  | gatgtgattg  | aatcttgtag  |
| 32761 | cagctTTTcaa | gagactataa  | aacaattTga  | ggaaaaaaat  | TTaatctggT  | atTTtattgg  |
| 32821 | ccctTTtacgc | aaagatgagg  | acattacagg  | acagataaat  | TTaaagtggg  | aaaaggagtt  |
| 32881 | ccaaaaattt  | gagcaatcaa  | taaatgaaac  | acatagagaa  | TTtgaagcat  | ctttacccaaa |
| 32941 | tcaaaatttc  | ttagcgtatt  | caacaaaaga  | tgatgacttc  | aaaatttagat | TTgaaaatga  |
| 33001 | agaaaaacca  | atagaaaatta | gcaatatTTt  | aagagctagc  | agtgaaggta  | aggTttataa  |
| 33061 | catatctTTa  | gggaaagata  | gtcaaataac  | tgcaacccaa  | aaaggcagcg  | aaaggcacta  |
| 33121 | tgattTTtact | ggTtcaagct  | catgtgaaat  | gaccattaat  | tggcaggcta  | aggattctga  |
| 33181 | aggtaacagc  | atagactgta  | gcatgaccgt  | aaaattggat  | tctggTggta  | tacagagtgt  |
| 33241 | tattggTgag  | ccaaaattTg  | gaggaataac  | gagTtcagaa  | gaagtattaa  | agttagTtgg  |
| 33301 | acaaaataaa  | gaagTttTta  | tcaacagaaa  | aactctgtat  | caagctTTTta | ctgatatagg  |
| 33361 | tcaagatatg  | gacagtctcg  | agcccacaca  | agatctatca  | tcgcaattgc  | ctacaccaag  |
| 33421 | cagcagTggg  | tattcctctc  | ctagcacacc  | ttcttcacgt  | agaagTtcta  | tatccaccag  |
| 33481 | cagtgaattt  | agtgatgaag  | atgaaatatt  | tgaggatgat  | atgtctggTg  | atgaagaaga  |
| 33541 | gtatgagcaa  | gaaggattaa  | aagataaagt  | agatgaaatt  | ataaacgaaa  | TTgaggaatt  |
| 33601 | aaaggaagga  | aaagaaacat  | ttgctcaaca  | TTTTgcagcg  | caggcaaagc  | agcttgagga  |

```

33661 tctaagatta gaacgtgact ccttgagaga taaagtcaat gaacaacagc gagcgatatt
33721 tgaaagaggt caaagaataa aggaacaaga ggaagaacta caggataaaa atgatgtaat
33781 aaagaactta aataatcagt tgaaagataa ggaaggtgaa acaaagtagg caaataaaga
33841 attacagaga aaagtgaagc taatttaact gtactaaagg aaaagaatgc aaatttggag
33901 aatgacctga agaaaatagt ggaaggttta aaggatgatc ataaaaagca gttggcagaa
33961 cagttaatgg aaacaaaaaa ggaaaacaat acattggctg aaacggcgag ccaattgtct
34021 gaagaattaa atgaattaca gagagaaaag gaagacttag agagggaaat tgcacaactt
34081 gaacctggaa gatcacttgc agatgagcta agcgaagaaa atacgaaggg ggaaatagaa
34141 aagcttcaat atcaacttaa ggaaaaggaa gggatgttaa cgtgtacaca ggaagagctg
34201 gcatctgtca aagagagtct agagcaactg cagaacatat tacagcagga aaaaggtcag
34261 gcaactcaaa ctgaagttga atatgaaagt agaggaacaa gcatgcagca gcaagaccaa
34321 ggtatacaag ctgtaaacaa caactcaagc agaacagcta gtgggttaag acaagaaaac
34381 aaaaaattga ctagagacaa actaactata tctgaacaat taaaacaaaa aataagagag
34441 attgacgagt taaagaaaaa tttaaagcaa ctgcaagaag aaaataaaca actcaaacaa
34501 gaagttacta aaaatgcagg agttgatgca tcatcttcaa cagggtcaaaa agaagctaaa
34561 gaagcagaag ttataccgca aaacattatg gattggcctg ttccaattcc agatgataaa
34621 ccggaagagc agaaaactcc attagagcca atcaaggtaa atacagaatt atcagatcca
34681 aaatcaatcc ctgctgaggg tccggaaaaa tctcctcctc tttcaaaatg atgagttttg
34741 cttctatagc tgacccaagc aacacgtcat cccgcgattt attcgcgtta tctcagccgc
34801 taacacgtag cgggatactt aaccgtcata ccgtgattta ttcacagtat ctcttagcca
34861 ctaacaagca gcgggatgac agcaatccta cgtcatgccg ccgcggtacc tctagatccc
34921 gctaactagt agcggaatga cgaatTTTTG tttttcaaat tatagctaaa catactgtaa
34981 ttgctattga atgatggaga gacatactcc attatttttag cacgaagtaa caaattcaat
35041 gaattggttc ttcaaaaata atttaaactt ttacagtagg tcatgaaata ttatagcgat
35101 ctcatataaa gaaactttta taagtatcgt tgatgagaaa ggaaaagttg ttaagggaaga
35161 agttgttgca agcgaagata aggcaatagc agattagcca aggcacaaaaa tacgaaccca
35221 taggaataga aagtggatag ttgtcaatat caatgtgcaa agagttaagg agttttggat
35281 taccagcaat ttgtgtagat gcaaggcata tggcagcagc gttgtctgca agaatacaata
35341 agaataataa aaacgatgag aggggtatag cgcagatgat gagaagtgtt agtaaaatca
35401 gttgtcaaat taaaatagcg cttggaagca gaagacagct aatgtgtagc aaacagcagg
35461 ttattggaac aataagaggg ttgttgaaga tacatggtcg gtaaaggatc aaaatttgaa
35521 actttcgctt taagaatata agaggcaata aataatttgg atgaaatcag taggagttca
35581 attgaagcgt tagttttagt tttggaagca atagaaaagt cattaagaaa gcttgacaaa
35641 atgctttcag aacaaggtga aaaagacgat gattgtaaat tgttaactac tgttccagga
35701 gtggggatta tagtagcaat gacgtataaa gctgcaattg ataaccacaa taggtttgag
35761 aaatctgata cagttggagc atatataggg t

```

```

//
LOCUS      JAQZAU010000068                60654 bp    dna        linear    ENV 17-MAR-2023
DEFINITION MAG: Wolbachia pipientis isolate wEsol contig_39992, whole genome
            shotgun sequence.
ACCESSION  JAQZAU010000068 JAQZAU010000000
VERSION    JAQZAU010000068.1
DBLINK     BioProject: PRJNA929258
            BioSample: SAMN33142973
KEYWORDS   WGS; ENV; Metagenome Assembled Genome; MAG.
SOURCE     Wolbachia pipientis (insect metagenome)
  ORGANISM Wolbachia pipientis
            Bacteria; Pseudomonadota; Alphaproteobacteria; Rickettsiales;
            Anaplasmataceae; Wolbachieae; Wolbachia.
REFERENCE  1 (bases 1 to 60654)
  AUTHORS  Fiutek,N., Couger,B.M., Roy,S., de la Torre,J.R. and Connor,E.F.
  TITLE    Genomic assessment of the contribution of the Wolbachia
            endosymbiont of Eurosta solidaginis to gall-induction
  JOURNAL  International Journal Molecular Sciences
REFERENCE  2 (bases 1 to 60654)
  AUTHORS  Fiutek,N., Couger,B.M., Roy,S., de la Torre,J.R. and Connor,E.F.
  TITLE    Direct Submission
  JOURNAL  Submitted (10-FEB-2023) Biology, San Francisco State University,
            1600 Holloway Ave, San Francisco, CA 94132, USA
COMMENT    ##Genome-Assembly-Data-START##

```

Assembly Date :: JUN-2019  
Assembly Method :: FLYE v. 06-2019  
Genome Representation :: Full  
Expected Final Version :: Yes  
Genome Coverage :: 100.0x  
Sequencing Technology :: Illumina HiSeq; PacBio Sequel  
##Genome-Assembly-Data-END##

FEATURES

|        |                                                                                                                                                                                                                                                                                                                                                                        |
|--------|------------------------------------------------------------------------------------------------------------------------------------------------------------------------------------------------------------------------------------------------------------------------------------------------------------------------------------------------------------------------|
| source | Location/Qualifiers                                                                                                                                                                                                                                                                                                                                                    |
|        | 1..60654                                                                                                                                                                                                                                                                                                                                                               |
|        | /organism="Wolbachia pipientis"                                                                                                                                                                                                                                                                                                                                        |
|        | /mol_type="genomic DNA"                                                                                                                                                                                                                                                                                                                                                |
|        | /submitter_seqid="contig_39992"                                                                                                                                                                                                                                                                                                                                        |
|        | /isolate="wEsol"                                                                                                                                                                                                                                                                                                                                                       |
|        | /isolation_source="galls on Solidago altissima"                                                                                                                                                                                                                                                                                                                        |
|        | /host="Eurosta solidaginis MN-2018-EFC"                                                                                                                                                                                                                                                                                                                                |
|        | /db_xref="taxon:955"                                                                                                                                                                                                                                                                                                                                                   |
|        | /environmental_sample                                                                                                                                                                                                                                                                                                                                                  |
|        | /country="USA: Cowling Arboretum, Carleton College, Northfield, MN"                                                                                                                                                                                                                                                                                                    |
|        | /lat_lon="44.48 N 93.13 W"                                                                                                                                                                                                                                                                                                                                             |
|        | /altitude="280 m"                                                                                                                                                                                                                                                                                                                                                      |
|        | /collection_date="2018-11"                                                                                                                                                                                                                                                                                                                                             |
|        | /metagenome_source="insect metagenome"                                                                                                                                                                                                                                                                                                                                 |
|        | /note="metagenomic"                                                                                                                                                                                                                                                                                                                                                    |
| gene   | <1..1034                                                                                                                                                                                                                                                                                                                                                               |
|        | /locus_tag="wEsol_00787"                                                                                                                                                                                                                                                                                                                                               |
| CDS    | <1..1034                                                                                                                                                                                                                                                                                                                                                               |
|        | /locus_tag="wEsol_00787"                                                                                                                                                                                                                                                                                                                                               |
|        | /codon_start=1                                                                                                                                                                                                                                                                                                                                                         |
|        | /transl_table=11                                                                                                                                                                                                                                                                                                                                                       |
|        | /fullproduct="qcoverage 100 , hcoverage 85.9649122807018 , similarity 100 , identity 100 , evaluate 9.89e-244 , alnlength 343 , Bacteria , Proteobacteria , WP_209452298.1 phage major capsid protein [Wolbachia endosymbiont of Ceratosolen solmsi]"                                                                                                                  |
|        | /cog="COG4653 COG4653 422 Predicted phage phi-C31 gp36 major capsid-like protein"                                                                                                                                                                                                                                                                                      |
|        | /pfam="Phage_capsid"                                                                                                                                                                                                                                                                                                                                                   |
|        | /tigr="TIGR01554 major_cap_HK97 385 phage major capsid protein, HK97 family"                                                                                                                                                                                                                                                                                           |
|        | /product="phage major capsid protein"                                                                                                                                                                                                                                                                                                                                  |
|        | /translation="ERLDLIETAAQRPEVNTDFSTSDKYFSDYIRKGMESGLSHKTLSDGDDSDIGGYLVTPHIVKRINKRVTDSSPMRQICSSQRISTETLDYIIEDFDRAGAGWSETVDDENGGNKSKYDFAKDTDTPKIQKISVTTYELYAQPQISQKLLDDAFVDVSWLVEKIAETFSKEESEAFIKGEGTFQPKGILAYENGNSYNKIEQVKTEKLDSDSIMMLYYSLDEYYSKNASFLINRSTLKDIRLLKSQTGQYLWQPSLSLEAPDTLMGIPVYQADMP PAPNNQLPVIAMADFKQAYKIVDNRGMRI LRDSYTNKPYVRFFVTKRVGGEVVNTSAIKLLKVASKY" |
|        | /besthit="qcoverage 100 , hcoverage 85.9649122807018 , similarity 100 , identity 100 , evaluate 9.89e-244 , alnlength 343 , Bacteria , Proteobacteria , WP_209452298.1 phage major capsid protein [Wolbachia endosymbiont of Ceratosolen solmsi]"                                                                                                                      |
| gene   | complement(1425..2066)                                                                                                                                                                                                                                                                                                                                                 |
|        | /locus_tag="wEsol_00788"                                                                                                                                                                                                                                                                                                                                               |
| CDS    | complement(1425..2066)                                                                                                                                                                                                                                                                                                                                                 |
|        | /locus_tag="wEsol_00788"                                                                                                                                                                                                                                                                                                                                               |
|        | /codon_start=1                                                                                                                                                                                                                                                                                                                                                         |
|        | /transl_table=11                                                                                                                                                                                                                                                                                                                                                       |
|        | /fullproduct="qcoverage 100 , hcoverage 100 , similarity                                                                                                                                                                                                                                                                                                               |

```

100 , identity 100 , evaluate 2.07e-146 , alnlength 213 ,
Bacteria , Proteobacteria , WP_010962606.1 MULTISPECIES:
ATP-binding cassette domain-containing protein
[Wolbachia]"
/cog="GlnQ COG1126 240 ABC-type polar amino acid
transport system, ATPase component"
/pfam="DUF258 AAA_23 AAA_22 AAA_29 AAA_16 AAA_17
Pfam-B_16450 AAA_18 AAA_21 AAA_10 ABC_tran SMC_N
Pfam-B_3333 AAA_21 Pfam-B_3856 Pfam-B_15070"
/product="ATP-binding
cassette domain-containing protein"
/translation="MIKMHNVCKLFNNVPLNNINLIIEQSIVGLAGPSGSGKSTLLR
CIQKLEVLDSGSIECNDSTGFVFQDFQLFSHMTVWENLTYAPKLKNKTQDQSDSLLES
LGIASKKNDYPSNLSGGQKQORVALARSLMMNPRILLCDEPTSGLDVATIVDVVELLQS
VRDMGITMIIASHNLDFLTAKISDRIILLKNGKIIVDINPKEIDEPTNYLKNNY"
/besthit="qcoverage 100 , hcoverage 100 , similarity 100
, identity 100 , evaluate 2.07e-146 , alnlength 213 ,
Bacteria , Proteobacteria , WP_010962606.1 MULTISPECIES:
ATP-binding cassette domain-containing protein
[Wolbachia]"
gene complement(2050..2697)
/locus_tag="wEsol_00789"
CDS complement(2050..2697)
/locus_tag="wEsol_00789"
/codon_start=1
/transl_table=11
/fullproduct="qcoverage 100 , hcoverage 100 , similarity
100 , identity 100 , evaluate 1.50e-140 , alnlength 215 ,
Bacteria , Proteobacteria , WP_007548901.1 MULTISPECIES:
amino acid ABC transporter permease [Wolbachia]"
/cog="HisM COG0765 222 ABC-type amino acid transport
system, permease component"
/pfam="BPD_transp_1"
/tigr="TIGR03003 ectoine_ehuD 212 ectoine/hydroxyectoine
ABC transporter, permease protein EhuD"
/product="amino acid ABC
transporter permease"
/translation="MQELISNFLFVGTGLAFTLKLKLLIGGLLLGMSLGGLFSVLRYNKI
CIPLINGIISVIRGTPILQLSVVYFMTPTIAGIKLNIFSAGIIAFGLNSCAYIAEIL
RAGIETISKNQFEAAKTLQIPSFYMWDRDILPQVIKNILPAMINEIIALLKETALIST
IGGVDIMRSAQMLAAEQFTYFIPLCLAGAYYYALVLLIEYIGKKIEQKGIYDKNA"
/besthit="qcoverage 100 , hcoverage 100 , similarity 100
, identity 100 , evaluate 1.50e-140 , alnlength 215 ,
Bacteria , Proteobacteria , WP_007548901.1 MULTISPECIES:
amino acid ABC transporter permease [Wolbachia]"
gene complement(2697..3431)
/locus_tag="wEsol_00790"
CDS complement(2697..3431)
/locus_tag="wEsol_00790"
/codon_start=1
/transl_table=11
/fullproduct="qcoverage 100 , hcoverage 100 , similarity
99.6 , identity 99.6 , evaluate 2.59e-169 , alnlength 244 ,
Bacteria , Proteobacteria , WP_015588976.1 MULTISPECIES:
ABC transporter substrate-binding protein [unclassified
Wolbachia]"
/cog="HisJ COG0834 275 ABC-type amino acid
transport/signal transduction systems, periplasmic
component/domain"
/pfam="SBP_bac_3"

```

```

/tigr="TIGR01096 3A0103s03R 250
lysine-arginine-ornithine-binding periplasmic protein"
/product="ABC transporter
substrate-binding protein"
/translation="MKKYILNATIVISILLTGCKENKHDNIIRFAISADYPPFEYYEN
GKFTGFDIELAQLVAKELGKEAIFKDMQFSTIFAALQSNSVDAAISTIGSTEEREKNF
DFSNSYYTGFEFGILYHKNKPIAGINNLTRKKIAVQLGTVMEIWLKEHVPTTAQIIAID
NNNQAVETLKSGHVDGVLIDEFQGVFSKKNPGLSCSATAKLDGGYVIAVNKGSALKD
KINEALKSLESKGVIQKIAEKWLGDN"
/besthit="qcoverage 100 , hcoverage 100 , similarity 99.6
, identity 99.6 , evalue 2.59e-169 , alnlength 244 ,
Bacteria , Proteobacteria , WP_015588976.1 MULTISPECIES:
ABC transporter substrate-binding protein [unclassified
Wolbachia]"
gene 3557..4012
/locus_tag="wEsol_00791"
CDS 3557..4012
/locus_tag="wEsol_00791"
/codon_start=1
/transl_table=11
/fullproduct="qcoverage 100 , hcoverage 100 , similarity
100 , identity 100 , evalue 2.85e-100 , alnlength 151 ,
Bacteria , Proteobacteria , WP_015588977.1 MULTISPECIES:
arginine repressor [unclassified Wolbachia]"
/cog="ArgR COG1438 150 Arginine repressor"
/pfam="Arg_repressor Arg_repressor_C"
/tigr="TIGR01529 argR_whole 146 arginine repressor"
/product="arginine
repressor"
/translation="MHDNTLGEHILNIIQNHEILEQSDLQILLKERGHNIPOATLSRK
LKKLKIAKVAGMYKVIDINQYRLPLILNMQISDFGLIVLHTQPGQASSLAYFLDQKYV
IYSLNNSKNIGIIGTIAGDDTVLLIIKSKAELNKVLQSIYETFPYLSPE"
/besthit="qcoverage 100 , hcoverage 100 , similarity 100
, identity 100 , evalue 2.85e-100 , alnlength 151 ,
Bacteria , Proteobacteria , WP_015588977.1 MULTISPECIES:
arginine repressor [unclassified Wolbachia]"
gene complement(4066..4827)
/locus_tag="wEsol_00792"
CDS complement(4066..4827)
/locus_tag="wEsol_00792"
/codon_start=1
/transl_table=11
/fullproduct="qcoverage 100 , hcoverage 100 , similarity
100 , identity 100 , evalue 1.81e-169 , alnlength 253 ,
Bacteria , Proteobacteria , WP_015588978.1 MULTISPECIES:
twin-arginine translocase subunit TatC [unclassified
Wolbachia]"
/cog="TatC COG0805 255 Sec-independent protein secretion
pathway component TatC"
/pfam="TatC"
/tigr="TIGR00945 tatC 215 twin arginine-targeting protein
translocase TatC"
/product="twin-arginine
translocase subunit TatC"
/translation="MWNSSKYASFYEHFAELRKRVIKFLFFCVAFGFCYYFKENIY
RFLAPLIEATKGSEGFSLIYTDLTEAFFVYLQVAIMSALLFSFPVFAWQFYMFLAPG
LYKSERAVLLPYLIATPVLFVTGATVVYYYIFPLAWKFFITFEHSGKSFGIPIEFMPS
VSEYLDLVLQFMFAFGTAFQIPVILTLMVRVGLLTAQSLSNKRRIAIVVIFIIAAILT
PPDVLSQVGLAIPMLILYELSILICRYIEKKKTKI"
/besthit="qcoverage 100 , hcoverage 100 , similarity 100

```

, identity 100 , evalue 1.81e-169 , alnlength 253 ,  
Bacteria , Proteobacteria , WP\_015588978.1 MULTISPECIES:  
twin-arginine translocase subunit TatC [unclassified  
Wolbachia]"

gene complement(4824..5921)  
/locus\_tag="wEsol\_00793"

CDS complement(4824..5921)  
/locus\_tag="wEsol\_00793"  
/codon\_start=1  
/transl\_table=11  
/fullproduct="qcoverage 100 , hcoverage 100 , similarity  
100 , identity 100 , evalue 1.32e-266 , alnlength 365 ,  
Bacteria , Proteobacteria , WP\_174516762.1 MULTISPECIES:  
glyceraldehyde-3-phosphate dehydrogenase [unclassified  
Wolbachia]"  
/cog="GapA COG0057 335 Glyceraldehyde-3-phosphate  
dehydrogenase/erythrose-4-phosphate dehydrogenase"  
/pfam="Gp\_dh\_N Gp\_dh\_C"  
/tigr="TIGR01534 GAPDH-I 330 glyceraldehyde-3-phosphate  
dehydrogenase, type I"  
/product="glyceraldehyde-3-phosphate dehydrogenase"  
/translation="MTVRVGINGLGRIGRGVLRRAIFEIEEYSKQIEVAVNGSLSAKQ  
HAHLIKYDSVHGKFSGDIDFNESQNWISINGKKFSLYRERNPENIPWNVDVILECTGA  
FNKREEAIRHNAEKVIVSAPVPDADVTIVYGVNDMDLEKEHKVISAGSCTTNCLAPIV  
KVLHSSLGIKSGFMTTIHAYTNDQNVLDGNHKKDLRRARACGLSMVPTTTGAAKTIGSV  
IPELKGKLDGTAVRVPVSNVSMVDFKFTTDKKATVEEINEIFKDAALSSTS FQRM TLE  
SNFWIPVSATRMTSEGTRMTEGYPM SNVLSICEEPLVSIDFVHNPHYSAIVDLTGTYVT  
GDICRVAAWYDNEWAFSLRMLDIALLSYSKV"  
/besthit="qcoverage 100 , hcoverage 100 , similarity 100  
, identity 100 , evalue 1.32e-266 , alnlength 365 ,  
Bacteria , Proteobacteria , WP\_174516762.1 MULTISPECIES:  
glyceraldehyde-3-phosphate dehydrogenase [unclassified  
Wolbachia]"

gene 7210..7743  
/locus\_tag="wEsol\_00794"

CDS 7210..7743  
/locus\_tag="wEsol\_00794"  
/codon\_start=1  
/transl\_table=11  
/fullproduct="qcoverage 100 , hcoverage 100 , similarity  
100 , identity 100 , evalue 1.57e-121 , alnlength 177 ,  
Bacteria , Proteobacteria , WP\_006280514.1 MULTISPECIES:  
HK97 family phage prohead protease [Wolbachia]"  
/cog="COG3740 COG3740 194 Phage head maturation protease"  
/pfam="Peptidase\_U35"  
/tigr="TIGR01543 proheadase\_HK97 142 phage prohead  
protease, HK97 family"  
/product="HK97 family phage  
prohead protease"  
/translation="MNKKFLYSPLSIK SIGENG VFSGYASVFNI VDKQNDLILPGA FK  
ENLNRN KIKLLWQHNPDEPIGSIID IYENDVGLYITAHLLLGIQKAE EVYLM LKTGAI  
NGLSIGYIPIEYD VDHKSGARVLKQVELWEVSLVTFPANLAAQVINVKNN EQEVL A  
RAIEKANAVLADMYISA"  
/besthit="qcoverage 100 , hcoverage 100 , similarity 100  
, identity 100 , evalue 1.57e-121 , alnlength 177 ,  
Bacteria , Proteobacteria , WP\_006280514.1 MULTISPECIES:  
HK97 family phage prohead protease [Wolbachia]"

gene 7879..8937  
/locus\_tag="wEsol\_00795"

CDS 7879..8937  
 /locus\_tag="wEsol\_00795"  
 /codon\_start=1  
 /transl\_table=11  
 /product="hypothetical protein"  
 /translation="MLNINNKNVNYEINIKRKEKKYSWSTVFAWLYLKTIGRILPKRWN  
 RWAENILYYDKTTANNEVQTDAFKTIIDGSVQVLDKPEVAVRESQSGVISKDGEVQTNK  
 VTFHDIAMQTEYVETTDKNSDQAQQVEDLQSKNGLLEVKIEELRSIIIRLKADLQSKN  
 SSLKKENRELQSIIIRLKKNYRELVEVTDKQEKEFLVKLKAKSEMIGCQGRELTELRA  
 EFTNKINELFERVEEVKREKSKKKKEELQEQVEHLNAKLERARNVAIFSIGERTKTLDE  
 ENLTLKNQQIESSPAKDEQQNGKLTEKDTQGQTKTKAPDTVSTVSTAKSTTGSMKSKF  
 QRVYLSFVGMRIAINFYL"  
 /besthit="qcoverage 91.193181818181818 , hcoverage  
 64.7177419354839 , similarity 99.4 , identity 99.4 ,  
 evalue 1.73e-176 , alnlength 321 , Bacteria ,  
 Proteobacteria , WP\_007549292.1 hypothetical protein  
 [Wolbachia endosymbiont of Drosophila ananassae]"

gene 8998..9180  
 /locus\_tag="wEsol\_00796"

CDS 8998..9180  
 /locus\_tag="wEsol\_00796"  
 /codon\_start=1  
 /transl\_table=11  
 /product="hypothetical protein"  
 /translation="MLNETIKSLSNQDDGKFESSKLELLESLNKQSAREIIEAKVKE  
 VVNEHCNTNSHCTTNR"  
 /besthit="qcoverage 100 , hcoverage 14.8514851485149 ,  
 similarity 100 , identity 98.3 , evalue 1.84e-27 ,  
 alnlength 60 , Bacteria , Proteobacteria , WP\_213863522.1  
 hypothetical protein [Wolbachia endosymbiont of Ceratitis  
 capitata]"

gene 9232..9753  
 /locus\_tag="wEsol\_00797"

CDS 9232..9753  
 /locus\_tag="wEsol\_00797"  
 /codon\_start=1  
 /transl\_table=11  
 /product="hypothetical protein"  
 /pfam="HTH\_23 HTH\_28 HTH\_1 HTH\_29 HTH\_Tnp\_IS630 HTH\_32  
 Pfam-B\_19535 HTH\_Tnp\_Tc3\_2 HTH\_24 HTH\_33"  
 /translation="MALRSKLLDEKVVESAKAMLKVKVRNNAYVTKKLNAVIAAKKHSI  
 TAVAKICCSIRTALTAWIKHLKFNREEKLFAPPQRRRKTRLNQSQRQVEAWIQENPN  
 ITIKEMRIKIQERFGLDISKSTVHRNMQRMKFSYITPRPVHNGQDKSKQEEFKKSQR  
 NYWQISRKRAIFL"  
 /cog="COG3415 COG3415 138 Transposase and inactivated  
 derivatives"  
 /besthit="qcoverage 90.1734104046243 , hcoverage  
 47.1299093655589 , similarity 100 , identity 100 , evalue  
 8.70e-97 , alnlength 156 , Bacteria , Proteobacteria ,  
 WP\_155968376.1 MULTISPECIES: IS630 family transposase  
 [Wolbachia]"

gene complement(9856..10188)  
 /locus\_tag="wEsol\_00798"

CDS complement(9856..10188)  
 /locus\_tag="wEsol\_00798"  
 /codon\_start=1  
 /transl\_table=11  
 /product="hypothetical protein"  
 /translation="MEWVREVTNLHKVRSSRVIVSYILLHKMFCCIYNQNLSTGLSSG  
 EYGGRYIISIFLGTFFKFFDLCLQAQSITRKVSRIPRYCDICSRNIFMQSVLTFELELS

```

PFLGLTAL"
/besthit="qcoverage 51.8181818181818 , hcoverage
96.6101694915254 , similarity 86.0 , identity 82.5 ,
evaluate 5.00e-24 , alnlength 57 , Bacteria ,
Proteobacteria , ONI56732.1 hypothetical protein
N500_0170 [Wolbachia pipientis wUni]"
gene complement(10271..10612)
/locus_tag="wEsol_00799"
CDS complement(10271..10612)
/locus_tag="wEsol_00799"
/codon_start=1
/transl_table=11
/fullproduct="qcoverage 100 , hcoverage 100 , similarity
100 , identity 100 , evaluate 1.53e-79 , alnlength 113 ,
Bacteria , Proteobacteria , AAS13810.1 transposase, IS5
family, OrfB [Wolbachia endosymbiont of Drosophila
melanogaster]"
/cog="COG3293 COG3293 124 Transposase and inactivated
derivatives"
/pfam="DDE_Tnp_1_2 DDE_Tnp_1"
/product="transposase, IS5 family, OrfB"
/translation="MRTKYTKVKMWADMGYQGRNLKNHIKEEYDIDIEIVKRPPCRF
WVHKDTPPELLPTREQGFKVQPRRWVVERTFAWVNRNRRLSKEYDLLTTSTENFIYLA
MSRVMLKREYA"
/besthit="qcoverage 100 , hcoverage 100 , similarity 100
, identity 100 , evaluate 1.53e-79 , alnlength 113 ,
Bacteria , Proteobacteria , AAS13810.1 transposase, IS5
family, OrfB [Wolbachia endosymbiont of Drosophila
melanogaster]"
gene complement(10723..11103)
/locus_tag="wEsol_00800"
CDS complement(10723..11103)
/locus_tag="wEsol_00800"
/codon_start=1
/transl_table=11
/fullproduct="qcoverage 100 , hcoverage 100 , similarity
100 , identity 100 , evaluate 1.16e-87 , alnlength 126 ,
Bacteria , Proteobacteria , AOV87106.1 transposase
[Wolbachia endosymbiont of Drosophila incompta]"
/cog="COG3293 COG3293 124 Transposase and inactivated
derivatives"
/pfam="DUF4096"
/product="transposase"
/translation="MRKKYPTDLSEREWARIEKHFRVSYKKGGRPPKYSKREILEAIF
YVLRGTGCQWRYLPNDFPLWKTVYEQFRQWKKQGIFEKMNIEITKYSRRKIGRNEQPSA
CIVDSQSVKTTEKGGSKAMMEVKK"
/besthit="qcoverage 100 , hcoverage 100 , similarity 100
, identity 100 , evaluate 1.16e-87 , alnlength 126 ,
Bacteria , Proteobacteria , AOV87106.1 transposase
[Wolbachia endosymbiont of Drosophila incompta]"
gene 11179..11619
/locus_tag="wEsol_00801"
CDS 11179..11619
/locus_tag="wEsol_00801"
/codon_start=1
/transl_table=11
/pfam="Pfam-B_2272"
/fullproduct="qcoverage 100 , hcoverage 100 , similarity
100 , identity 100 , evaluate 2.11e-95 , alnlength 146 ,
Bacteria , Proteobacteria , WP_213863558.1 hypothetical

```

```

protein [Wolbachia endosymbiont of Ceratitis capitata]"
/translation="MGKELRDDTLKAKLSPSVRKCVKKLEFNKQEGVNKIVDSILHSF
NSKNNNNNDSGELLKEIVTGKLTEAKMKCFSNKIQELQLALSIRDKFLSPDQGMCNQT
QGGVNEYQLTEKAKKEHIPNSSMSSPNIASIHSLNSQKAVRIGS"
/product="hypothetical protein"
/besthit="qcoverage 100 , hcoverage 100 , similarity 100
, identity 100 , evalue 2.11e-95 , alnlength 146 ,
Bacteria , Proteobacteria , WP_213863558.1 hypothetical
protein [Wolbachia endosymbiont of Ceratitis capitata]"
gene complement(11603..12778)
/locus_tag="wEsol_00802"
CDS complement(11603..12778)
/locus_tag="wEsol_00802"
/codon_start=1
/transl_table=11
/fullproduct="qcoverage 100 , hcoverage 100 , similarity
99.7 , identity 99.7 , evalue 1.21e-282 , alnlength 391 ,
Bacteria , Proteobacteria , WP_015588983.1 MULTISPECIES:
CCA tRNA nucleotidyltransferase [unclassified Wolbachia]"
/cog="PcnB COG0617 412 tRNA
nucleotidyltransferase/poly(A) polymerase"
/pfam="PolyA_pol PolyA_pol_RNAbd"
/product="CCA tRNA
nucleotidyltransferase"
/translation="MQVDQETSLIIDAIIEEFGGEARLVGGCVRDSILQRDVHDIDLAT
NLLPDQTMKALKLRNIKTIPTGLNHGTITAILNQRSFEITTLRHDKCDGRHAKVEFT
NNWQADASRRDFTFNALYADKHGHIYDYFGGIEDLKARRLNFIGNAEDRIKEDYLRIL
RAFRFHAKICAGDLSDEILSVCKKHSHMIQNLSGERIRDEILKLLCNDPFPPTLKSQM
ESDVLQKIIPKEVKCEILSSSLLFGTDVLVKLALLLRTTKKNDRLSLGEYIIMFLRLS
NKQKKKLLFLLSNDIKTELSEKEQKKYISLFGRELYCDLVRICGVESGENVDEYISFA
NTFNIPKFPLSGDDLIGIGHQPGKSLGRNLELLKQHWEDSSYTTLTKEELVLYAKSLF"
/besthit="qcoverage 100 , hcoverage 100 , similarity 99.7
, identity 99.7 , evalue 1.21e-282 , alnlength 391 ,
Bacteria , Proteobacteria , WP_015588983.1 MULTISPECIES:
CCA tRNA nucleotidyltransferase [unclassified Wolbachia]"
gene complement(12779..13774)
/locus_tag="wEsol_00803"
CDS complement(12779..13774)
/locus_tag="wEsol_00803"
/codon_start=1
/transl_table=11
/pfam="OTU"
/fullproduct="qcoverage 99.3957703927493 , hcoverage
99.6969696969697 , similarity 91.2 , identity 90.0 ,
evalue 7.12e-208 , alnlength 329 , Bacteria ,
Proteobacteria , WP_015588984.1 MULTISPECIES:
hypothetical protein [unclassified Wolbachia]"
/translation="MAEPRKRKLSNDFYDTGSPKRFKSSGQEITLLNSNPYPDNFHV
GAIGNGSCFFDSFRQGLEQQKGIEVTVEQLREDCKEFAQKNPPKWFTNAIVNSHDNNG
QHRSETVDDYTANIMRNDRWGDPDVEGRILCQKYDVKLHVIENQTVDNQDLFLHELID
NSGSKSAGEYNKVNYDDSSVLHVINKGHAHFEPLLDNRKSLAKQEQEDFLLAKKLQLD
EILEYCNLSKDISERAEVKKRFDELLAENADGKIGDVVGQCVSDIKQRIERSEKQNP
SLPRCSMEESRTEKIFHQQQISQLKCKINLHSPVYFYIGVCASISYNMNLQYVLT"
/product="hypothetical protein"
/besthit="qcoverage 99.3957703927493 , hcoverage
99.6969696969697 , similarity 91.2 , identity 90.0 ,
evalue 7.12e-208 , alnlength 329 , Bacteria ,
Proteobacteria , WP_015588984.1 MULTISPECIES:
hypothetical protein [unclassified Wolbachia]"
gene 13893..14987

```

```

CDS      /locus_tag="wEsol_00804"
13893..14987
/locus_tag="wEsol_00804"
/codon_start=1
/transl_table=11
/fullproduct="qcoverage 100 , hcoverage 100 , similarity
100 , identity 100 , evalue 1.90e-254 , alnlength 364 ,
Bacteria , Proteobacteria , WP_015588985.1 MULTISPECIES:
redox-regulated ATPase YchF [unclassified Wolbachia]"
/cog="COG0012 COG0012 372 Predicted GTPase, probable
translation factor"
/pfam="FeoB_N MMR_HSR1 FH2 YchF-GTPase_C"
/tigr="TIGR00092 TIGR00092 368 GTP-binding protein YchF"
/product="redox-regulated
ATPase YchF"
/translation="MSFNCGIVGLPNIGKSTLFNALTESSAAEAANYPFCTIEPNIGK
ISIKDQRLKQIAAIAGSEKIIYNQLEVVDIAGLVKGASKGEGLGKFLSHIREVDAIV
HLLRCFTDDDISHVHISKIDPISDAEVVEMELILADIDSIEKRLPQLEKKAKQGDKELK
RQLELMQEVLATLKLGPARSLENINEDMKLLQLLTTPVMYVCNVEDTNVITGNEL
SKKVERMAEENKSKFYCISAKLEADIANLDSEEEKQSFLSEFGLQESGLDGVARIMYE
VLSMITFFTVGPKEARAWPVKIGSTADKAAGVIHTDFEKGFIKAETISFADYIKYGSE
SACKDAGKIRFEGRDYIVQDGDIMHFRFNV"
/besthit="qcoverage 100 , hcoverage 100 , similarity 100
, identity 100 , evalue 1.90e-254 , alnlength 364 ,
Bacteria , Proteobacteria , WP_015588985.1 MULTISPECIES:
redox-regulated ATPase YchF [unclassified Wolbachia]"
gene     15601..16803
CDS      /locus_tag="wEsol_00805"
15601..16803
/locus_tag="wEsol_00805"
/codon_start=1
/transl_table=11
/pfam="Pfam-B_5409 Ank_2 Ank_4 Ank_5 Ank Ank_3 Ank_4"
/fullproduct="qcoverage 100 , hcoverage 100 , similarity
100 , identity 100 , evalue 7.50e-261 , alnlength 400 ,
Bacteria , Proteobacteria , WP_015588986.1 MULTISPECIES:
Ankyrin repeat domain protein [unclassified Wolbachia]"
/translation="MKNILYFILLVVVFGSLSLFAIEQREEKKIGSVHKNENVGARKQ
DLLSSTNQKDELKSNVDAKQTQEAESKRLDGTDDKEKLQHNNENKASVVEKTISEGEKI
DKDLPNQLEGSTDKFAQNLPNMANKEVNKDLKPEPLPLSADLNENTTDPQKNLQADQ
KIDIKDNELSKSDASQLLEGKKEKVENQSEEKKVKETNSNSKDRNRVKPITKKDESEK
KNLQKWTKLNREPIKEWGHKDIQSKSIYKRQYDSLNEHLPTTVFIDDYSKQFFYCIKK
NNLTCLRGVISKLEKIGLTIQEILRFRNKLGDTPLIYSVKQGEVDIVRFLLLQGADLR
VVNNNFQSPIDIAIEKKQINIINAIAEMMPHLLLEDRKIDNKESAMYDWA VKTKENNE
SQCDKQDD"
/product="Ankyrin repeat
domain protein"
/besthit="qcoverage 100 , hcoverage 100 , similarity 100
, identity 100 , evalue 7.50e-261 , alnlength 400 ,
Bacteria , Proteobacteria , WP_015588986.1 MULTISPECIES:
Ankyrin repeat domain protein [unclassified Wolbachia]"
gene     16796..18601
CDS      /locus_tag="wEsol_00806"
16796..18601
/locus_tag="wEsol_00806"
/codon_start=1
/transl_table=11
/pfam="Pentapeptide_4 Pentapeptide Pfam-B_10960
Pentapeptide_3 Pentapeptide_4 Pentapeptide Pentapeptide_3
Pfam-B_18433 Pentapeptide_4 Pentapeptide Pentapeptide_3

```

```

Pentapeptide_4 Pentapeptide_3 Pentapeptide Pfam-B_18433
Pentapeptide_4 Pentapeptide_3 CfAFP Pentapeptide
Pentapeptide_3 Pentapeptide_4 Pfam-B_18433 Pentapeptide_4
Pentapeptide_4 Pentapeptide_3 Pentapeptide Pfam-B_18433
Pentapeptide Pentapeptide_3"
/fullproduct="qcoverage 100 , hcoverage 100 , similarity
100 , identity 100 , evalue 9.37e-88 , alnlength 601 ,
Bacteria , Proteobacteria , WP_015588987.1 MULTISPECIES:
pentapeptide repeat-containing protein [unclassified
Wolbachia]"
/translation="MIRFLILILVGHLGNETNDEKNQISDFLALHDVKYVSYSKK
DFAEFLVQCHKEGVPEDFKKGFGSNLNGANFNQLYLSKSVFDGVSIGADFSNTDLS
VSFIDVDLRGANFSNANLHGIIKIKGTNLSFTKFVSANLTDIVFDQSNVSYADFISSDL
KKVSMHNVIGLHTNFSNVKMNFNSLSNSNVSHVNFSDSEINDTVMQKNLNDNASFFGV
DAYKLKIQFSSLKNANIYGAEKESDFTGSNLSDACLNSSIIINSNFDETNLSNTQIS
YVNDNSSFVQSILNGSKIKHAYVSETNLQDADLSNIDFSFSELHQVNVSNADIRHGK
FHNTKVANSNMNGSFFDHSLFTSAKIEDSDLSTTSMYKIKIQDSQVYNSTLSRHNIDS
SEIENSTFFNLLADNSSWSNLKVTNSNFIESDFRSSLHANAFRKTSFFLSNLSNSTI
SDMSFLSSSIYKSSVANSHLTGCKFDNSILIDNQGQKLAGLENAITSIEDLQEKISQ
GEKFNVNYSYFEFKDMNLENADFSNSTLSRAKFVNVLNKANFEKTDLRYTVFDNSSL
IGTNLSNSNLEGSSFLNSDPKSTMLKNAKKNDRKK"
/product="pentapeptide
repeat-containing protein"
/besthit="qcoverage 100 , hcoverage 100 , similarity 100
, identity 100 , evalue 9.37e-88 , alnlength 601 ,
Bacteria , Proteobacteria , WP_015588987.1 MULTISPECIES:
pentapeptide repeat-containing protein [unclassified
Wolbachia]"
gene 18585..19190
/locus_tag="wEsol_00807"
CDS 18585..19190
/locus_tag="wEsol_00807"
/codon_start=1
/transl_table=11
/fullproduct="qcoverage 100 , hcoverage 100 , similarity
100 , identity 100 , evalue 7.23e-132 , alnlength 201 ,
Bacteria , Proteobacteria , WP_015588988.1 MULTISPECIES:
guanylate kinase [unclassified Wolbachia]"
/cog="Gmk COG0194 191 Guanylate kinase"
/pfam="Guanylate_kin AAA_33 AAA_17 AAA_18"
/tigr="TIGR03263 guanyl_kin 180 guanylate kinase"
/product="guanylate kinase"
/translation="MTVKSEGVLLVLSSPSGAGKTTISAKLLEQSTNLVRSVSMTTRK
PRPGEINGKDYFFVTEEFKHELCKAGQMLEYAKVFENFYGIPRNFIEQNLSNGISVLL
SIDWQGAFHFLFKLMRKKVVSFILPPSMEEELRLRLQKRNSDDASEIERRLAEAQKEIS
KRDKYDYVIINDIDKSVEEISSILNKERLKKLKEKPSLED"
/besthit="qcoverage 100 , hcoverage 100 , similarity 100
, identity 100 , evalue 7.23e-132 , alnlength 201 ,
Bacteria , Proteobacteria , WP_015588988.1 MULTISPECIES:
guanylate kinase [unclassified Wolbachia]"
gene 19477..21789
/locus_tag="wEsol_00808"
CDS 19477..21789
/locus_tag="wEsol_00808"
/codon_start=1
/transl_table=11
/pfam="LacI Ank_2 Ank_5 Pfam-B_14646 Ank_2 Ank_4 Ank_2
Ank_4 Ank_5 MOZART1"
/fullproduct="qcoverage 100 , hcoverage 100 , similarity
99.9 , identity 99.9 , evalue 0.0 , alnlength 770 ,

```

Bacteria , Proteobacteria , WP\_174516766.1 ankyrin repeat domain-containing protein [Wolbachia endosymbiont of Cardiocondyla obscurior]"  
 /translation="MGIDITALTTNADKLGECIDKNKKQEQRKDEQLYGIIKRKVKK  
 EEHKREKPRGQDGTLLKCKRLEFKDASPEVLTKLEESLREQEKEYRYVQCFLPVLDK  
 AIERSKKISNETKERVQKAISEITYNSKYCNQNDRRDSGIESDYSSDAGDDYEKHSIS  
 NPNTANEDQEVEKSNGTTHNNVQLLKAIKNGNNRKLKKYLDCTDISSIKAEEGKNIL  
 HLIASLEKKQKCKFLGTLIKTVTKEDLAQLINSENQTPFQVALINKVTKEKHESNTIR  
 SNDNTLKFLLTKLLEHGASSDNLELSTEELQNLKEEQKTYRNFLEKLAEQGGKSKLKP  
 EIRINTEAKIKEIIPHTINTPDSNDNYLLHPVIKNSDKLFEKELLEKGADISLKDTDG  
 NNALHLIVKPETKQKLKLLNILLETGQKEQFIKAVNDKKEGQTPHLHQILQRIQESKE  
 PSLKNKIKNVVKNVVKKEFKDTGRYKTLLEFLQNGADITVQDKDGKNALHYIASFKGE  
 QKVTCLLELILNSVEKEKFSKAANAANEKERTPLQVALITKTTKDKHNLVNPKSRDNTI  
 KFCVKLLQNGVDPKQLILPERLWSKEYYKTIKIEKSMGRALIPDDMRTELKCNFGRK  
 LKARDIVKYINNVACKAVTTLVFAALACAAIFSASQGIITIATASSIIAVIGVCYLIY  
 LNLENIYEGFGKIKGKFTEEKQLTLQDNAPKNDTQCNNSVKDIENKSNDDLEEQEVQKS  
 SNQSEHTESPDPDKMSAISINSLKNCVGIV"  
 /product="ankyrin repeat domain-containing protein"  
 /besthit="qcoverage 100 , hcoverage 100 , similarity 99.9 , identity 99.9 , evalue 0.0 , alnlength 770 , Bacteria , Proteobacteria , WP\_174516766.1 ankyrin repeat domain-containing protein [Wolbachia endosymbiont of Cardiocondyla obscurior]"  
 complement(21790..23589)  
 /locus\_tag="wEsol\_00809"  
 CDS complement(21790..23589)  
 /locus\_tag="wEsol\_00809"  
 /codon\_start=1  
 /transl\_table=11  
 /fullproduct="qcoverage 100 , hcoverage 100 , similarity 100 , identity 100 , evalue 0.0 , alnlength 599 , Bacteria , Proteobacteria , WP\_015588990.1 MULTISPECIES: succinate dehydrogenase flavoprotein subunit [unclassified Wolbachia]"  
 /cog="SdhA COG1053 562 Succinate dehydrogenase/fumarate reductase, flavoprotein subunit"  
 /pfam="Thi4 FAD\_binding\_2 Pyr\_redox\_2 DAO Succ\_DH\_flav\_C Pfam-B\_6713"  
 /tigr="TIGR01816 sdhA\_forward 584 succinate dehydrogenase, flavoprotein subunit"  
 /product="succinate dehydrogenase flavoprotein subunit"  
 /translation="MDKSAYEIIIEHEYDVVVVGAGGAGLRATLGMAATNFSVACISKI  
 FPTRSHTVAAQGGISAAAGNIGEDDWRWHAYDTIKGSDWLGDQDAIEYMCKNAAKAVI  
 ELENFGVPFSRTEDGKIYQRSFSGMTTHFGKGKSAQRTCAAADKTGHAILHTLYQQCL  
 KFNAEFFVEYFVIDLIMDSETCCGVLAWSLCDGTLHRFRAHRVVLATGGYGRVYFSAT  
 SAHTCTGDGNGMVVRAGLPLEDMFVQFHPTGIYGSGLMTEGCRGEGGYLVNSQGEK  
 FMERYAPKAKDLASRDVVSRAITIEIREGRGVGPKKDYMYLTIAHLDPVVKLRPLGI  
 SETARTFAGVDVTKDPIPIPTVHYNMGGIPTNYYGEVITLKQGKEEVVDGLFAIGEA  
 ACVSVHGANRLGSNSLLDLVVFGRAAALRAREKLKSGTPHKKLHSDCTDWIVDRFNKM  
 RFASGGLKVAKIRSEMNTMQKYASVFRVAEVLEEGKKAIKKVAKMMPDISLED RSM  
 WNSDLVEALELANMIPQAVITMECAANREESRGAHAREDFPERDDKNWMKHTIAWLEE  
 KKGQINVKIDYKKVAEKTLSGEIDFIAPEKRVY"  
 /besthit="qcoverage 100 , hcoverage 100 , similarity 100 , identity 100 , evalue 0.0 , alnlength 599 , Bacteria , Proteobacteria , WP\_015588990.1 MULTISPECIES: succinate dehydrogenase flavoprotein subunit [unclassified Wolbachia]"  
 complement(24469..25890)  
 gene

CDS  
 /locus\_tag="wEsol\_00810"  
 complement(24469..25890)  
 /locus\_tag="wEsol\_00810"  
 /codon\_start=1  
 /transl\_table=11  
 /fullproduct="qcoverage 100 , hcoverage 100 , similarity 100 , identity 100 , evaluate 0.0 , alnlength 473 , Bacteria , Proteobacteria , WP\_141457167.1 MULTISPECIES: glutamate--tRNA ligase [unclassified Wolbachia]"  
 /cog="GlnS COG0008 472 Glutamyl- and glutaminyl-tRNA synthetases"  
 /pfam="tRNA-synt\_1c Pfam-B\_1171 Pfam-B\_1171"  
 /tigr="TIGR00464 gltX\_bact 470 glutamate--tRNA ligase"  
 /product="glutamate--tRNA ligase"  
 /translation="MPDVVTRFAPSPTGFLHIGGARTALFNWLYAKHHGGRFLLRIED TDRKRSTKEAIDVIEGLRWLGVSVDGEIVYQSKRIERHKEVANLLVEKGRAYHCYCP EDEVAEKKIKAREESKIYKHKCTTKPPSCHPSSRHWKNMWSRAGMTSGVRSVVRFKVP DSQEIVIDDKIYGQIKVNSNQLDDIVILRSDNTPTYIFAVVIDDHDAGITDIIRGSDH LTNTFKHLLIYQALDFDIPRFAHVPLIHGEDGNKLSKRHGATSVCDYEKMGILPKAMR NYLLRLGWSHGNDIIISDEQAIEWFNLESIGRSPARLDFKKLEHLNNHYISNMSNEDI LTLMLRENTLTDDKKGYLLQGLTELKKRANYLTELLDLAKFYIQDPPLDLSEAEQIV KSNLNIKLLASFLSKIGDENWNKGFLSSQIKECAKLHDMKISDVYHSLRAPITGVMD APGIIDIMVILGKDECIRRLQAI"  
 /besthit="qcoverage 100 , hcoverage 100 , similarity 100 , identity 100 , evaluate 0.0 , alnlength 473 , Bacteria , Proteobacteria , WP\_141457167.1 MULTISPECIES: glutamate--tRNA ligase [unclassified Wolbachia]"  
 gene 26040..26141  
 CDS 26040..26141  
 /locus\_tag="wEsol\_00811"  
 /locus\_tag="wEsol\_00811"  
 /codon\_start=1  
 /transl\_table=11  
 /product="hypothetical protein"  
 /translation="MDGLVDIAKLLSDNEANINWRYTGPFDKTKQRV"  
 /besthit="qcoverage 100 , hcoverage 13.9830508474576 , similarity 100 , identity 100 , evaluate 2.94e-14 , alnlength 33 , Bacteria , Proteobacteria , WP\_190321244.1 ankyrin repeat domain-containing protein [Wolbachia pipientis]"  
 gene 26283..26795  
 CDS 26283..26795  
 /locus\_tag="wEsol\_00812"  
 /locus\_tag="wEsol\_00812"  
 /codon\_start=1  
 /transl\_table=11  
 /product="hypothetical protein"  
 /translation="MLPAVQEIVNDLETEADNKITKAEAGDRKEVSRLKEELKCNKK YIKDALCSKDYAFNKKRETPLYLNAQQKEIKQIAGIKDSFICNQKFHLCLYIIGAI ACIAALCLSLYFLFLVSQS FALSSMVAIASGGVTYLSVKACSEIHALHNESTLVENAN VQLAGESLGV"  
 /besthit="qcoverage 100 , hcoverage 67.7290836653386 , similarity 100 , identity 99.4 , evaluate 6.98e-108 , alnlength 170 , Bacteria , Proteobacteria , WP\_015589031.1 MULTISPECIES: ankyrin repeat domain-containing protein [unclassified Wolbachia]"  
 gene 26868..28943  
 CDS 26868..28943  
 /locus\_tag="wEsol\_00813"

```

/locus_tag="wEsol_00813"
/codon_start=1
/transl_table=11
/fullproduct="qcoverage 100 , hcoverage 100 , similarity
100 , identity 100 , evaluate 0.0 , alnlength 691 ,
Bacteria , Proteobacteria , WP_015589032.1 MULTISPECIES:
acetyl-CoA carboxylase biotin carboxylase subunit
[unclassified Wolbachia]"
/cog="COG4770 COG4770 645 Acetyl/propionyl-CoA
carboxylase, alpha subunit"
/pfam="CPSase_L_chain ATP-grasp_4 ATP-grasp_3 CPSase_L_D2
ATP-grasp_5 Dala_Dala_lig_C ATP-grasp RimK Biotin_carb_C
Biotin_lipoyl Biotin_lipoyl_2"
/product="acetyl-CoA
carboxylase biotin carboxylase subunit"
/translation="MIEKKYSKILIANRGEIACRIIRTAHKMGISCVCIIYSADVNSV
HVRQADESRYIGPSPCLSYLNIEKICEVAVETGAQAVHPGYGFLAENPDFPRALQKH
NIDFIGPSAETIEVTANKITAKEAAKKAGVNVVPGYMGKISDAAHAAQVAEEIGFPVM
LKAASGGGGKGMRIVNSKKEIELAFTSATNEAEKSFKDGSIKIEKYIELPRHIEIQII
ADKYGNIVCLGEREC SIQRNNQKIIETPSPFISEEVQRKMYVQCVSLAKQVGYFSAG
TVEFVVDKQNFYFLEVNTLRLQVEHPVTEFITGIDIVEEMIRTSCGEKLRFNQDDIKL
TGSAIESRICAEDPSKKFFPSSGRIKYDKPGENDYVRIDDGVAAGSEISMFYDSMIA
KVITYGKDRVEAISRMQKALSECYIEGVTNNIEFLESIFHHPNFIAAKLHTRFIPDHY
PSGFHGDVTEEYIKIFIFTALYVHLENEERYHHKAVNETSQVSFQCVTLESSKKEGA
PVSATRMAGDRARDLFIVNINDNEYSVNAKYQDNILITVYNHNKYSVIGKWKSSYRLL
YITINDDTNIALKIERQGSKYFIRHAGMKAECIFKPHVAELSRLMLNNETEGISADA
VKSPISGLLVKLHVNVGDQVEIGQPLFVVEAMKMENIICAEEAMVIKNIPVQEGKNVQ
IGDVVCFLK"
/besthit="qcoverage 100 , hcoverage 100 , similarity 100
, identity 100 , evaluate 0.0 , alnlength 691 , Bacteria ,
Proteobacteria , WP_015589032.1 MULTISPECIES: acetyl-CoA
carboxylase biotin carboxylase subunit [unclassified
Wolbachia]"
gene complement(28892..29920)
/locus_tag="wEsol_00814"
CDS complement(28892..29920)
/locus_tag="wEsol_00814"
/codon_start=1
/transl_table=11
/fullproduct="qcoverage 100 , hcoverage 100 , similarity
100 , identity 100 , evaluate 1.14e-228 , alnlength 342 ,
Bacteria , Proteobacteria , WP_174516784.1 MULTISPECIES:
COX15/CtaA family protein [unclassified Wolbachia]"
/cog="CtaA COG1612 323 Uncharacterized protein required
for cytochrome oxidase assembly"
/pfam="COX15-CtaA"
/product="COX15/CtaA family
protein"
/translation="MEAKPVAIWFLCCIMVILMVGIGGFTRLTRAGLSITEWKPI TG
TLPLPSKQDWLQEKLKYEATPEYKALNYGISMEEFRAIYLYIEYVHRLVARLTGLVFVL
PFIYFTLRRKISKVKVVIKLFVALLFGALQAFAGWYMKVSGLVTEPHVSHYRLALHLL
ALIIFALLSYQFFDYQIRPQQTKLVSGNTIYYARMILVLIVIQIIFGAFVAGLNAGL
IYNTFPLMDGQVVPEDLFFLQPIWLNIFENRATVQFIHRALALLILTLVVILTVKNAS
VKPVYIMLLSIIIIQIILGVVTLLHPIAIAIAHQVFSFILFGSSLYFLCYLRKQTTS
PICTFFPS"
/besthit="qcoverage 100 , hcoverage 100 , similarity 100
, identity 100 , evaluate 1.14e-228 , alnlength 342 ,
Bacteria , Proteobacteria , WP_174516784.1 MULTISPECIES:
COX15/CtaA family protein [unclassified Wolbachia]"
gene complement(29902..31491)

```

```

CDS      /locus_tag="wEsol_00815"
         complement(29902..31491)
         /locus_tag="wEsol_00815"
         /codon_start=1
         /transl_table=11
         /fullproduct="qcoverage 100 , hcoverage 100 , similarity
100 , identity 100 , evalue 0.0 , alnlength 529 ,
Bacteria , Proteobacteria , WP_141457162.1 MULTISPECIES:
glycosyltransferase [unclassified Wolbachia]"
         /cog="COG1215 COG1215 439 Glycosyltransferases, probably
involved in cell wall biogenesis"
         /pfam="Glyco_tranf_2_3 Glycos_transf_2 Glyco_transf_21
Glyco_trans_2_3 Pfam-B_2922"
         /product="
glycosyltransferase"
         /translation="MPILQADNVEKIKFDSSSLCKEQEKLFFYYKFNIIPWQKLNDDTTF
MVEDTSLDITRWVETHYGIDYVLIKVDSEQILNLLNSHFGISEFASNYLYYKNPNFSA
KSIKLSSIFFASFFIVTSILTLEKCTYFALMLIFIIGCSSYLKFKFIATVFSLCEISN
QKVDYSKLNPIYITILLPVFEESAVIGQLIESVKSLDYPKSKLDVKLLVESDDQETLA
AIEKYTLPPQYFEVIKVPKSLPRTKAKSCNYAMSFARGKYAVIYDADDKPDPLQLKKAL
IEFNKGDDKLACVQAKLNYYNCDYNFLTKSFSLEYMWNWFQYLLPGFQKMNMPMPLGGS
SNHFSVKILKKVFFWDAYSVTEDADLGLRLAQMGYKTRMIDSETLEESPIAVFAWIKQ
RARWIKGYMQTYIVHLKNIKSLYKHTGFKGILLNLFVGSAAFIFFTPFLLLSLILT
KVLNELFLYYFVVVYVTNLILLVIAVKQQKMPFYFYIVSIFFPVYSLLSVA AFLALW
EFILYPERWNKTKHGLWKQNL"
         /besthit="qcoverage 100 , hcoverage 100 , similarity 100
, identity 100 , evalue 0.0 , alnlength 529 , Bacteria ,
Proteobacteria , WP_141457162.1 MULTISPECIES:
glycosyltransferase [unclassified Wolbachia]"
gene     complement(31497..31973)
CDS      /locus_tag="wEsol_00816"
         complement(31497..31973)
         /locus_tag="wEsol_00816"
         /codon_start=1
         /transl_table=11
         /fullproduct="qcoverage 100 , hcoverage 100 , similarity
100 , identity 100 , evalue 1.26e-86 , alnlength 158 ,
Bacteria , Proteobacteria , WP_141457161.1 MULTISPECIES:
hypothetical protein [unclassified Wolbachia]"
         /cog="AtpF COG0711 161 F0F1-type ATP synthase, subunit b"
         /pfam="Mt_ATP-synt_B ATP-synt_B Pfam-B_1635 Peptidase_M41
HrpE"
         /tigr="TIGR01144 ATP_synt_b 147 ATP synthase F0, B
subunit"
         /product="hypothetical protein"
         /translation="MSTSLIIGLAFLVIFVLSYKLLKKVIKNALNNKRNKSKFSSEET
EKFRKDMLEYKKSSEKYKKLDAEVNEMMNEALDKANSIIKHNRQQLDQTLDDNAHSN
LKKVTDQVEKALGDLQANTASIAADAVKKIMHERKDDKRSSEVISSFSRDLNKKLH"
         /besthit="qcoverage 100 , hcoverage 100 , similarity 100
, identity 100 , evalue 1.26e-86 , alnlength 158 ,
Bacteria , Proteobacteria , WP_141457161.1 MULTISPECIES:
hypothetical protein [unclassified Wolbachia]"
gene     complement(31982..32461)
CDS      /locus_tag="wEsol_00817"
         complement(31982..32461)
         /locus_tag="wEsol_00817"
         /codon_start=1
         /transl_table=11
         /fullproduct="qcoverage 100 , hcoverage 100 , similarity
99.4 , identity 99.4 , evalue 2.89e-97 , alnlength 159 ,

```

Bacteria , Proteobacteria , WP\_015589036.1 MULTISPECIES:  
 ATP synthase subunit B [unclassified Wolbachia]"  
 /cog="AtpF COG0711 161 F0F1-type ATP synthase, subunit b"  
 /pfam="ATP-synt\_8 Fun\_ATP-synt\_8 YMF19 Selenoprotein\_S  
 Pfam-B\_1942 ATP-synt\_B"  
 /tigr="TIGR01144 ATP\_synt\_b 147 ATP synthase F0, B  
 subunit"  
 /product="ATP synthase  
 subunit B"  
 /translation="MPQLDVSTFFSQVFWFLIFFSSSLFFVVSCLFLPKLDEIISTRSK  
 EVLDSFNSSVHLLRLTEDQVAKYNAALTQARIQAKKIIDDALAQAEMRANVKNILEE  
 EDKKKSKLIEEKVAEFKSEYTDQLKQMATSIALIYYTKLTNSEIEEEFVADLVSKEF"  
 /besthit="qcoverage 100 , hcoverage 100 , similarity 99.4  
 , identity 99.4 , evalue 2.89e-97 , alnlength 159 ,  
 Bacteria , Proteobacteria , WP\_015589036.1 MULTISPECIES:  
 ATP synthase subunit B [unclassified Wolbachia]"  
 gene complement(32465..32692)  
 /locus\_tag="wEsol\_00818"  
 CDS complement(32465..32692)  
 /locus\_tag="wEsol\_00818"  
 /codon\_start=1  
 /transl\_table=11  
 /fullproduct="qcoverage 100 , hcoverage 100 , similarity  
 100 , identity 100 , evalue 1.27e-38 , alnlength 75 ,  
 Bacteria , Proteobacteria , WP\_006014985.1 MULTISPECIES:  
 F0F1 ATP synthase subunit C [Wolbachia]"  
 /cog="AtpE COG0636 79 F0F1-type ATP synthase, subunit  
 c/Archaeal/vacuolar-type H+-ATPase, subunit K"  
 /pfam="ATP-synt\_C"  
 /tigr="TIGR01260 ATP\_synt\_c 58 ATP synthase F0, C  
 subunit"  
 /product="F0F1 ATP synthase  
 subunit C"  
 /translation="MDLVALKFIAIGLAVFGMLGAGLGIANIFSAMLNGIARNPESEG  
 KMKSYVYIGAAMVEIMGLLAFVLAMLLIFAA"  
 /besthit="qcoverage 100 , hcoverage 100 , similarity 100  
 , identity 100 , evalue 1.27e-38 , alnlength 75 ,  
 Bacteria , Proteobacteria , WP\_006014985.1 MULTISPECIES:  
 F0F1 ATP synthase subunit C [Wolbachia]"  
 gene complement(32752..33477)  
 /locus\_tag="wEsol\_00819"  
 CDS complement(32752..33477)  
 /locus\_tag="wEsol\_00819"  
 /codon\_start=1  
 /transl\_table=11  
 /fullproduct="qcoverage 100 , hcoverage 100 , similarity  
 100 , identity 100 , evalue 1.95e-158 , alnlength 241 ,  
 Bacteria , Proteobacteria , WP\_015589037.1 MULTISPECIES:  
 F0F1 ATP synthase subunit A [unclassified Wolbachia]"  
 /cog="AtpB COG0356 246 F0F1-type ATP synthase, subunit a"  
 /pfam="ATP-synt\_A"  
 /tigr="TIGR01131 ATP\_synt\_6\_or\_A 227 ATP synthase F0, A  
 subunit"  
 /product="F0F1 ATP synthase  
 subunit A"  
 /translation="MALNPLEQFKVYTIIELPRLFGYDVSFTNSSFFTMSVILMILF  
 LLFGIKKGSVIPGYLQAAVEYVYDFVISIENNTGSKGLQHIPLIFTVFIFILSCNLV  
 GVLPSFTVTSHVIVTFALSMVVFYITIVGFKERGVEFLRILLPKGTPSWLAPIIII  
 IKLFAYLVRPISLSIRLAANMIAGHTIIKVIAGFIVNMNIFFTPAPFLFIIALIGFEV  
 FVAILQAYIFTILTTCVYLSDAVK"

```

/blasthit="qcoverage 100 , hcoverage 100 , similarity 100
, identity 100 , evalue 1.95e-158 , alnlength 241 ,
Bacteria , Proteobacteria , WP_015589037.1 MULTISPECIES:
F0F1 ATP synthase subunit A [unclassified Wolbachia]"
gene 33762..34001
/locus_tag="wEsol_00820"
CDS 33762..34001
/locus_tag="wEsol_00820"
/codon_start=1
/transl_table=11
/fullproduct="qcoverage 100 , hcoverage 84.9462365591398
, similarity 100 , identity 98.7 , evalue 9.56e-52 ,
alnlength 79 , Bacteria , Proteobacteria , WP_015589038.1
MULTISPECIES: hypothetical protein [unclassified
Wolbachia]"
/translation="MEQEFGNGYIEFVDCFLDEDTRDYYIGLNVLDESHNAIKHFVFD
GNIDEDAWDYGSLKFFPEIDLKGDIEKILSLRKKI"
/product="hypothetical protein"
/blasthit="qcoverage 100 , hcoverage 84.9462365591398 ,
similarity 100 , identity 98.7 , evalue 9.56e-52 ,
alnlength 79 , Bacteria , Proteobacteria , WP_015589038.1
MULTISPECIES: hypothetical protein [unclassified
Wolbachia]"
gene 34114..36453
/locus_tag="wEsol_00821"
CDS 34114..36453
/locus_tag="wEsol_00821"
/codon_start=1
/transl_table=11
/fullproduct="qcoverage 100 , hcoverage 100 , similarity
100 , identity 100 , evalue 0.0 , alnlength 779 ,
Bacteria , Proteobacteria , WP_141457159.1 MULTISPECIES:
phenylalanine--tRNA ligase subunit beta [unclassified
Wolbachia]"
/cog="PheT COG0072 650 Phenylalanyl-tRNA synthetase beta
subunit"
/pfam="tRNA_bind B3_4 B5 FDX-ACB"
/tigr="TIGR00472 pheT_bact 798 phenylalanine--tRNA
ligase, beta subunit"
/product="
phenylalanine--tRNA ligase subunit beta"
/translation="MKFTLSWLLLEYLETNASLEEITDKLTHIGLEVEDVIDNSRLTGF
IVAELVLEVPHPNADKLKLVNDGSKILQIVCGANNVREGMKTVLASLGSTLPESDL
TIKSTKIRGMLSEGMLCSASELALVQEKSEGIIELSDDYKVGDKFFNCDPVIDINVTP
NRGDCLGIYGIARDLAATGIGTLKTL SIPQLTSSINSPIDVEVTDGESFISGIYIANV
KNQESPKWLKDRLESIGMRSISAIVDITNYIMISFSRPMHAYDAKKIEGELTVRKAND
GEKFAGLNGKEYLLNKDISVIAGDKNIHGIAGIIGGKCSECTLETTDIFLESAWFDPI
SITKSSRQLGISTDASYRFARSVDPGFTFDGLNLA AKMILDL CGGETSSVVSAGSLDS
ADTKVSFDYQDVNKF GSVSVSPDEVLDILTKLGFSIDKKTEGNWNVQVPSWRPDVTIP
ADLIEEVTRIYGYDKIKEEPLPNNV EVDSTYDNLRLMTN RGFHEVLTWSFMSESTA
EKFGYSNKLFIIDNPFNNSFNIMRPSIMP NLLQVTADNIAHGISDLAIFEIGPIYDGE
AQSKYVLSGIRSGNNLPRNHYNTRKVDVFD AKADCIAALEFFNVNCDNL TIEKAEKE
HYHPGKSGTLSFKNKVAGYFGELHPNILD LFDIKQKVVGFEVILENIENLPVSRKKFI
DYKYQSVKRDFAFIVNKDVEVGNIINVIKKSSELITEVLIFDVYHGNNIEPNKMSIAL
SVTFCSPIHTLTEKEIQKESSAIVNLVCENTGGTLRTYR"
/blasthit="qcoverage 100 , hcoverage 100 , similarity 100
, identity 100 , evalue 0.0 , alnlength 779 , Bacteria ,
Proteobacteria , WP_141457159.1 MULTISPECIES:
phenylalanine--tRNA ligase subunit beta [unclassified
Wolbachia]"

```

```

gene      complement(36444..38669)
          /locus_tag="wEsol_00822"
CDS       complement(36444..38669)
          /locus_tag="wEsol_00822"
          /codon_start=1
          /transl_table=11
          /fullproduct="qcoverage 100 , hcoverage 83.8235294117647
, similarity 99.9 , identity 99.7 , evaluate 0.0 ,
alnlength 741 , Bacteria , Proteobacteria ,
WP_209452286.1 hypothetical protein [Wolbachia
endosymbiont of Ceratosolen solmsi]"
          /translation="MAYGVLAIVILVNIIVLAALLIPATLALATFYLLNKKLSHFLI
AAIKISNGLCQNEHQNIEVSFHEIEAIEADIKWNMEVKFPPQFKQLVRDLYEDKDGSW
FNVARDEHNTILKLSANIHLKNGLKPLRNEIKNVLATSIQEFAKTMEELIKLEKKEI
TYDKLKELLDEFRLKVVSSIDFKLTTHLIYNAYQVAFIQAIKFQRRRGEDFSLEDEI
KNSLVRQELSESQGKELPSRKEIIIEDLKNAGMEVEDSKDDEFSVHEAEWKKLIKEGEI
VKRTVIDIYKNKHLQATEKALGNAKEEIERLIGIGQTRCNNIYKKLKEIHENSSTLND
TLKRGLEDLFKFEYHDQEIERRLIKSVMKVQGKLSQSDIPDKEQSLRKQLEDLEKK
VKVPSDKEASAKINDFIEKMYLEIKKYKVQRLLREQKGVLRRLCKLRKYGESGLAEI
IEAFRVQDEGHLEKSTLEQTLKDQNKRLQAEQNNREKGGHPGTRSIEVLLKRNEEILKA
LKQLELGKKELLINEETKNNDYKEELTSREKIKFAVIEDDLLKVFKLETDFDEKEIKKLL
ERAELEYCLAEKRIKYPVIKTKDNKHFSQLLSPLIDNLTKNIINNIPGNSEGCIOK
VKNWSKVMFGAIKIGASNAYKETTERKALNVAHNTYKEGETFLQCFQSNYEGIGAFGLG
NLFSDDGVTFKNDVWPKEIEHLHGMWDRFFKDIEFNIGNKLDEVSVTQQRQETMIVTQ
R"
          /product="hypothetical protein"
          /besthit="qcoverage 100 , hcoverage 83.8235294117647 ,
similarity 99.9 , identity 99.7 , evaluate 0.0 , alnlength
741 , Bacteria , Proteobacteria , WP_209452286.1
hypothetical protein [Wolbachia endosymbiont of
Ceratosolen solmsi]"
gene      complement(38690..39097)
          /locus_tag="wEsol_00823"
CDS       complement(38690..39097)
          /locus_tag="wEsol_00823"
          /codon_start=1
          /transl_table=11
          /product="hypothetical protein"
          /translation="MNKAVADDYEKVVDLNNSDDLGVESVATLEEEEEFFDAVEEQ
EPLANFNVPLSIFHYKDYNDFFTSWYNISSRIFKEVNRACPEKKVLNLALSVMFPY
IVFTALGLAVYNKLKTNDKTQISSEENKTKKVK"
          /besthit="qcoverage 98.5185185185185 , hcoverage
15.0452488687783 , similarity 100 , identity 100 , evaluate
8.42e-77 , alnlength 133 , Bacteria , Proteobacteria ,
WP_015589040.1 hypothetical protein [Wolbachia
endosymbiont of Drosophila simulans]"
gene      complement(39156..41063)
          /locus_tag="wEsol_00824"
CDS       complement(39156..41063)
          /locus_tag="wEsol_00824"
          /codon_start=1
          /transl_table=11
          /product="hypothetical protein"
          /pfam="tRNA-synt_1 tRNA-synt_1g tRNA-synt_1e Anticodon_1"
          /translation="MVNLENGLKGHHTTGQFHAIDSGVQPIPVWKSDDARYPRVDVYGS
IEELERDFNVKIDDLHRPFIDTLTRPNPDDPTGKSVMRVPDVFDCWFESGSMFPAQI
HYPFENKEWFESADFITEYIAQTRGWFTLFLVSTALFDREPFKNCICHGVLDVKQG
KLSKRLNNYADPMEVFDYRGSALRFLMLSGSIVCGGNLLLDKEGNSIRDVLKNVIKP
IWNZYHFFFTMYANADGIKAEVCKDYQSTIDRYMISKCFEAVEGIGQASMNNYNSQEACK
ILMNFFEVLNNWYIRRSRERFWKSDLDQDKTDAYNVLYTVFYIILRAAAPLLPLITEN

```

```

IWQGLKYEETSVHLANFPQLEKFDSQLIAKMDLVREICNSALSIRNTFNIRIRQPLGS
MIIYHQSSCSFLEGEPFVPIEFSPVIRVADTGIQKEKSAGMTPSMNEYQEMIKDEVN
VKKLELVNRLEDIASLELKLSFPLL GKRI PDKIKKLVQYVKEGKWKQVENEQVFLGNE
SENYIIEKGEYELLLKANSYGSAVFDNNKGVVILNTELNDELILEGLARDVVR LIQET
RKQADFHISDRIRV I I K T E E E K I K E A I N T W F E Y I K E Q T L A L S L D I N T E I G T N F Y S K E Y
QDLSVGIRLNY"
/cog="IleS COG0060 933 Isoleucyl-tRNA synthetase"
/besthit="qcoverage 96.2204724409449 , hcoverage
54.6023235031278 , similarity 100 , identity 100 , evaluate
0.0 , alnlength 611 , Bacteria , Proteobacteria ,
WP_187470091.1 isoleucine--tRNA ligase [Wolbachia
endosymbiont of Drosophila sechellia]"
gene complement(41273..41467)
/locus_tag="wEsol_00825"
CDS complement(41273..41467)
/locus_tag="wEsol_00825"
/codon_start=1
/transl_table=11
/product="hypothetical protein"
/pfam="tRNA-synt_1_2 tRNA-synt_1"
/tigr="TIGR00392 ileS 861 isoleucine--tRNA ligase"
/translation="MHSAFFIADYVTEEDGTGVVHTAPGFGEEDFYLCQSHDIPVICP
IDNSGKFTAESFRFGRGSCF"
/cog="IleS COG0060 933 Isoleucyl-tRNA synthetase"
/besthit="qcoverage 76.5625 , hcoverage 4.51197053406998
, similarity 100 , identity 100 , evaluate 3.21e-26 ,
alnlength 49 , Bacteria , Proteobacteria , WP_182320175.1
isoleucine--tRNA ligase [Wolbachia pipientis]"
gene complement(41434..42519)
/locus_tag="wEsol_00826"
CDS complement(41434..42519)
/locus_tag="wEsol_00826"
/codon_start=1
/transl_table=11
/product="hypothetical protein"
/pfam="tRNA-synt_1 tRNA-synt_1g"
/tigr="TIGR00392 ileS 861 isoleucine--tRNA ligase"
/translation="MKSKHYPTDVSSPDFSSLEKEI IKFWQENKVFERSVEERSKDNC
FVFYDGPFPFANGLP HYGHLLTGFIKDAFARYQTMLQKRVERRFGWDCHGLPAEMGAEK
ELGISGRTEVEKFGIDKFNDHCRTSVMKISSEWEKYVNRQARWVDFHNDYKTMDKLFM
ESVMWAFKQLYDKGLVYESMRVVPYSWACETPLSNFETRLDNAYREKVSKAVTVAFEL
LENPQQFKSVKRKCKLLAWTTTPWTLPSNLALAIGKDIEYCAVSVHSLMSFQVRTLES
ISGSQCRSTGMTEVNERSSVNSEIYIFAESYLEKFISHSEQNNIPYENCNIKLKANDL
AGLPYKPLFDYFKD TKK CIPRFSS LIM"
/cog="IleS COG0060 933 Isoleucyl-tRNA synthetase"
/besthit="qcoverage 98.6149584487535 , hcoverage
31.8141197497766 , similarity 98.0 , identity 98.0 ,
evaluate 1.43e-252 , alnlength 356 , Bacteria ,
Proteobacteria , WP_141457155.1 MULTISPECIES:
isoleucine--tRNA ligase [unclassified Wolbachia]"
gene 42696..44162
/locus_tag="wEsol_00827"
CDS 42696..44162
/locus_tag="wEsol_00827"
/codon_start=1
/transl_table=11
/fullproduct="qcoverage 100 , hcoverage 100 , similarity
100 , identity 100 , evaluate 0.0 , alnlength 488 ,
Bacteria , Proteobacteria , WP_007548626.1 MULTISPECIES:
oligopeptide:H+ symporter [Wolbachia]"

```

```

/cog="PTR2 COG3104 498 Dipeptide/tripeptide permease"
/pfam="Pfam-B_3817 MFS_1 PTR2 MFS_1"
/tigr="TIGR00924 yjdL_sub1_fam 475 amino acid/peptide
transporter (Peptide:H+ symporter)"
/product="oligopeptide:H+
symporter"
/translation="MDQKTDKFPQFLKMLCFVEMWERFSYYGMRALLVLFLTSHLGFT
DERAFTIYSLFAATGYAIPILGGFLADKLMGFRNMVLLGGIVMIAGHACMSLVKFEPG
LLYLGLSLIAIGTGMFKGNVTNLLSSCYGKDDPERSRGFTLFYVGVNIGAILASISCG
YVAHLFGWHYGFGLAGIGMSIGLIFFLKFNLLGDSGLSPYPELMNKRILGIKIFGIV
LIGSFLSSSIIAKMLIHSEFFTNMLIFIGITALGIFIYIISKLSAEQRRKLVALSILV
VFFLCFFALEMQLGSLVNLFTERNVINNVLGITIPASVSQAINPLSIIIFGFLFGTYM
KFKQKYATSMFTLGLLTAMCFFTLYIGCLNSNIEGKVEYLYLIIAISFMGLGELCIA
PLVQEQATTLPKLNLRGVVMGIVMLSLAFSNLAGVAISKFMSVPSVNGKINYLESLI
YKEGFLKVGIFNLMLVIVFLFFFFNFIHKVVTNSSCTKN"
/besthit="qcoverage 100 , hcoverage 100 , similarity 100
, identity 100 , evaluate 0.0 , alnlength 488 , Bacteria ,
Proteobacteria , WP_007548626.1 MULTISPECIES:
oligopeptide:H+ symporter [Wolbachia]"
gene complement(44302..45621)
/locus_tag="wEsol_00828"
CDS complement(44302..45621)
/locus_tag="wEsol_00828"
/codon_start=1
/transl_table=11
/fullproduct="qcoverage 100 , hcoverage 100 , similarity
100 , identity 100 , evaluate 0.0 , alnlength 439 ,
Bacteria , Proteobacteria , WP_010962578.1 MULTISPECIES:
tRNA (N6-isopentenyl
adenosine(37)-C2)-methylthiotransferase MiaB [Wolbachia]"
/cog="MiaB COG0621 437 2-methylthioadenine synthetase"
/pfam="UPF0004 Radical_SAM TRAM"
/tigr="TIGR01574 miaB-methiolase 437 tRNA-i(6)A37
thiotransferase enzyme MiaB"
/product="tRNA
(N6-isopentenyl adenosine(37)-C2)-methylthiotransferase
MiaB"
/translation="MKGLYIKTYGCQMNVYDSVLMENVIKPLGFNVSDAGKADLVIL
NTCHIREKAAEKLYSELGKIHSRLKEMTIVVAGCVAQAEGEEVFRRAPFVDIVVGPQS
IATLPELIVKASRSKGVHINTDFPEVAKFDKLPDECYGNSQGSSAFLAIQEGCDKFCT
FCVVPYTRGAEYSRPVNEIFREALKLVANGANEINLLGQNVNAYHGECEGEVWDLGKL
ISHIAKIEKLERIRYTTSHPRDMHESLYLAHAEEPKLMPFVHLVPVQSGSNKILHAMNR
KHTAAEYLEIIDRFRKLKPEIEFSSDFIVGFPGETEKDFEETMKLVEKVRYAQAYSFK
YSPRPGTPGAERKDQVPEEVKTERLLRLQKLISKQQLFNFQSMVGKTIPVLFSDKKGK
HQNQIIGKSPYMQSVCIDDSSEDKYRDKIVNVKVLEARQSSLLGCAFH"
/besthit="qcoverage 100 , hcoverage 100 , similarity 100
, identity 100 , evaluate 0.0 , alnlength 439 , Bacteria ,
Proteobacteria , WP_010962578.1 MULTISPECIES: tRNA
(N6-isopentenyl adenosine(37)-C2)-methylthiotransferase
MiaB [Wolbachia]"
gene complement(45807..46193)
/locus_tag="wEsol_00829"
CDS complement(45807..46193)
/locus_tag="wEsol_00829"
/codon_start=1
/transl_table=11
/fullproduct="qcoverage 85.15625 , hcoverage 100 ,
similarity 100 , identity 100 , evaluate 5.46e-74 ,
alnlength 109 , Bacteria , Proteobacteria ,
WP_197907214.1 hypothetical protein [Wolbachia]

```

```

endosymbiont of Kradibia gibbosae]"
/translation="MTDLTQKKQKARICSDAWLMYNTEIKIPVLPFLSFQCLTLGSSF
LYKFTKSASFYNAPILTKLNALLAIKFPGCQCQATRMTPTFFFLDPSVKHWDDKKRAL
PSWMEASVSYPHDTLTTVIPLLVSGI"
/product="hypothetical protein"
/besthit="qcoverage 85.15625 , hcoverage 100 , similarity
100 , identity 100 , evalue 5.46e-74 , alnlength 109 ,
Bacteria , Proteobacteria , WP_197907214.1 hypothetical
protein [Wolbachia endosymbiont of Kradibia gibbosae]"
gene complement(46190..46618)
/locus_tag="wEsol_00830"
CDS complement(46190..46618)
/locus_tag="wEsol_00830"
/codon_start=1
/transl_table=11
/fullproduct="qcoverage 100 , hcoverage 100 , similarity
100 , identity 100 , evalue 2.49e-92 , alnlength 142 ,
Bacteria , Proteobacteria , WP_010082641.1 MULTISPECIES:
protoporphyrinogen oxidase HemJ [Wolbachia]"
/cog="COG1981 COG1981 149 Predicted membrane protein"
/pfam="UPF0093"
/tigr="TIGR00701 TIGR00701 142 TIGR00701 family protein"
/product="protoporphyrinogen
oxidase HemJ"
/translation="MNYYHWLEAFHVISVIMWMAGMLYLPRLYVYHATVKPGSENDL
LQTMKRLRLRYIINPAMLFSLGLGITLMVIREAYREGWFHVKAFAILLMLIIHMLLAK
YRKNFAMGSNKKSHIYFRVLNEAVTVLIIIVIVIMVVVKPF"
/besthit="qcoverage 100 , hcoverage 100 , similarity 100
, identity 100 , evalue 2.49e-92 , alnlength 142 ,
Bacteria , Proteobacteria , WP_010082641.1 MULTISPECIES:
protoporphyrinogen oxidase HemJ [Wolbachia]"
gene 46674..47654
/locus_tag="wEsol_00831"
CDS 46674..47654
/locus_tag="wEsol_00831"
/codon_start=1
/transl_table=11
/fullproduct="qcoverage 100 , hcoverage 100 , similarity
100 , identity 100 , evalue 6.19e-234 , alnlength 326 ,
Bacteria , Proteobacteria , WP_006279887.1 MULTISPECIES:
pyruvate dehydrogenase (acetyl-transferring) E1 component
subunit alpha [Wolbachia]"
/cog="AcoA COG1071 358 Pyruvate/2-oxoglutarate
dehydrogenase complex, dehydrogenase (E1) component,
eukaryotic type, alpha subunit"
/pfam="E1_dh TPP_enzyme_C DXP_synthase_N Transketolase_N"
/tigr="TIGR03182 PDH_E1_alpha_y 315 pyruvate dehydrogenase
(acetyl-transferring) E1 component, alpha subunit"
/product="pyruvate
dehydrogenase (acetyl-transferring) E1 component subunit
alpha"
/translation="MKAENFTKEQIIGFYRKMLLIRRFEEKAGQLYGMGLIGGFCHLS
IGQEAVAVGTQAASKLGDAFITSYRDHGLMLACDSDPNVVMALGTGKETGCSKGKGS
MHVFDVEKKKFFGGHGIVGAQVPIGTGIAFANKYKKKDNVVFYTFGDGAANQGQVYESF
NMAISLWELPVVYIIENNEYAMGTSVQRSTLVTELYKRGESFGIPGKQVDGMDFFSVYE
ATSEAAEHTRSGKGPILLEMKTYRGRHSMSPATYRLKEEVEDMKQNHDPISLTKKY
MTDNKMASEEECKVIDKEIRDLVKKSEDFAKNSKEPSVDELYTDVYKFVS"
/besthit="qcoverage 100 , hcoverage 100 , similarity 100
, identity 100 , evalue 6.19e-234 , alnlength 326 ,
Bacteria , Proteobacteria , WP_006279887.1 MULTISPECIES:

```

pyruvate dehydrogenase (acetyl-transferring) E1 component subunit alpha [Wolbachia]"

gene 48063..48986  
/locus\_tag="wEsol\_00832"

CDS 48063..48986  
/locus\_tag="wEsol\_00832"  
/codon\_start=1  
/transl\_table=11  
/fullproduct="qcoverage 100 , hcoverage 100 , similarity 100 , identity 100 , evalue 3.94e-216 , alnlength 307 , Bacteria , Proteobacteria , WP\_006279888.1 MULTISPECIES: RluA family pseudouridine synthase [Wolbachia]"  
/cog="RluA COG0564 289 Pseudouridylate synthases, 23S RNA-specific"  
/pfam="S4 PseudoU\_synth\_2"  
/tigr="TIGR00005 rluA\_subfam 298 pseudouridine synthase, RluA family"  
/product="RluA family pseudouridine synthase"  
/translation="MLQSIKTILIEDDNVRLDRYIRRIFFDLKQSVIEKSLRKGLIKV DDCKAKSSDRVNSGQTITLKHLYNIENANSRKYNEKLVNLLRENILYEDEYILAINK PAGVIVQGGVKVKISMSDLLDQIREGETFKIVHRLDRDTSGVIFARNANVARYLMEE FKGRRVKKTYLALTSGIPSKDSGTIDYPLVKKYVSGQEKVVVDENSPQNATTHFSIIA KSKHNVAYLKLQIPITGRTHQLRAHLAHINCPILGDGKYGGKAFIDGIANKIHLHSHS LSLKLPNNKEITITAPITKHIEKSIEALFFD"  
/besthit="qcoverage 100 , hcoverage 100 , similarity 100 , identity 100 , evalue 3.94e-216 , alnlength 307 , Bacteria , Proteobacteria , WP\_006279888.1 MULTISPECIES: RluA family pseudouridine synthase [Wolbachia]"

gene complement(48994..50256)  
/locus\_tag="wEsol\_00833"

CDS complement(48994..50256)  
/locus\_tag="wEsol\_00833"  
/codon\_start=1  
/transl\_table=11  
/fullproduct="qcoverage 100 , hcoverage 100 , similarity 100 , identity 100 , evalue 5.26e-294 , alnlength 420 , Bacteria , Proteobacteria , WP\_015589043.1 MULTISPECIES: MFS transporter [unclassified Wolbachia]"  
/pfam="Pfam-B\_3877 MFS\_1 Sugar\_tr MFS\_2 MFS\_2 Sugar\_tr"  
/tigr="TIGR00883 2A0106 400 MFS transporter, metabolite:H+ symporter (MHS) family protein"  
/product="MFS transporter"  
/translation="MNNIRKAILSGMICNMIVWYELTLFGVLTDTIINVFFPSEDHYL STLKFLGVFAIGFAFRPIGAVIFGYMGDKYGRKTLTSTVILISISSTIMGIIPGYKE IGLLSPVLLVFCRIVQGITAGGETSINTAFTIEHSDKDKNLGFLGSMKPFSGALGTLT CITMIFICKRVTGENYEIWGWKLLFYFCFFLTIGFLTRYILKESLAYKTNKYANNLA HSPLLELVRNYKRPLIISINLGIAQNAIVYAAIMFYNISIKELVILSISVKDLMRIVI QVVFAASAVLFAILSDKVGRKRVMPVLIMLSLIGTCVLPLLSSVNHYVVIITYLLIT IPVGASFGIYGSVICELFPTKVRCTGVSLANNISAGIFGGLSPYICMWLIEKTETKLA AGIYLTACTLISLISVLQIKAKDRKVDW"  
/besthit="qcoverage 100 , hcoverage 100 , similarity 100 , identity 100 , evalue 5.26e-294 , alnlength 420 , Bacteria , Proteobacteria , WP\_015589043.1 MULTISPECIES: MFS transporter [unclassified Wolbachia]"

gene complement(50318..52120)  
/locus\_tag="wEsol\_00834"

CDS complement(50318..52120)  
/locus\_tag="wEsol\_00834"  
/codon\_start=1

```

/transl_table=11
/fullproduct="qcoverage 100 , hcoverage 100 , similarity
99.8 , identity 99.8 , evalue 0.0 , alnlength 600 ,
Bacteria , Proteobacteria , WP_015589044.1 MULTISPECIES:
aspartate--tRNA ligase [unclassified Wolbachia]"
/cog="AspS COG0173 585 Aspartyl-tRNA synthetase"
/pfam="tRNA_anti DUF1463 tRNA-synt_2 tRNA-synt_2b GAD"
/tigr="TIGR00459 aspS_bact 586 aspartate--tRNA ligase"
/product="aspartate--tRNA
ligase"
/translation="MNCYKTHTCNELRKNDVEKEVTLSGWLYRKRDHGNLIFVDLRDF
YGITQLVFNNDKDFDEISNLKLESVITVTGIVEARTEDTVNSSISTGEIEVIVNNLR
VESEVEFHFDDEEIAKEERSILASITGEQEYPENMRFKYRFLDLRREKVRNNIILRSQI
IAELRKLMIERGFLEIQTPILTASSPEGARDYLVP SRLNPGKFYALPQAPQIFKQLLM
VSGFDKYFQIAPCFRDEDARADRS PGEFYQLDLEMSFVTQEDIFDVIESALYKVFQF
SRKSVDKDFPRITYKEAMLKYGSDKPD LRNPLLISDVTEIFRDSGFNIFKSNIERGMV
VRAIPAPKTAEEPRSFFDKKIEHAQKEFGAKGLGYITFDKDG TAKGPIAKFLDENRLN
HIREATNIEPGDSVFFASDKENEAANIAGKVRTLLGSELSFIDDNIFKFCWIIDFPYF
VYDDKSKKIDFFHNPF SMPHGGLKDLEDKNPLDILAYQYDLVCNGIELSSGAIRNNKL
DIMYKAFAIAGYSRGEVDTRFGALVRAFRFGVPPHGGIAPGVDRIVMLLADEPNIREV
ICFPMNQGEDVLMGAPSKVEDKHLRELSLKVIE"
/besthit="qcoverage 100 , hcoverage 100 , similarity 99.8
, identity 99.8 , evalue 0.0 , alnlength 600 , Bacteria ,
Proteobacteria , WP_015589044.1 MULTISPECIES:
aspartate--tRNA ligase [unclassified Wolbachia]"
gene 52317..52748
/locus_tag="wEsol_00835"
CDS 52317..52748
/locus_tag="wEsol_00835"
/codon_start=1
/transl_table=11
/fullproduct="qcoverage 100 , hcoverage 100 , similarity
100 , identity 100 , evalue 6.34e-91 , alnlength 143 ,
Bacteria , Proteobacteria , WP_006279891.1 MULTISPECIES:
hypothetical protein [Wolbachia]"
/translation="MPLTQIILYSVTLLA VAAVFLFLRKIYKNRIRKIIFPRKVFKEE
WEEDRKFNELYQKNKQKELLKQQETLREKQKDVQVYKEDPEIVDIAKPVGKWTKMVM
GNGLMQRFAQLIHREGGQKGFWELFVKAQASTQGKHKGKGR"
/product="hypothetical protein"
/besthit="qcoverage 100 , hcoverage 100 , similarity 100
, identity 100 , evalue 6.34e-91 , alnlength 143 ,
Bacteria , Proteobacteria , WP_006279891.1 MULTISPECIES:
hypothetical protein [Wolbachia]"
gene 52752..53375
/locus_tag="wEsol_00836"
CDS 52752..53375
/locus_tag="wEsol_00836"
/codon_start=1
/transl_table=11
/fullproduct="qcoverage 100 , hcoverage 100 , similarity
100 , identity 100 , evalue 5.54e-148 , alnlength 207 ,
Bacteria , Proteobacteria , WP_015589045.1 MULTISPECIES:
heme ABC exporter ATP-binding protein CcmA [unclassified
Wolbachia]"
/cog="CcmA COG4133 209 ABC-type transport system involved
in cytochrome c biogenesis, ATPase component"
/pfam="T2SE AAA_15 MutS_V AAA_29 AAA_23 SMC_N
Mg_chelatase AAA_17 AAA_18 AAA_16 AAA_21 ABC_tran AAA_15"
/tigr="TIGR01189 ccmA 198 heme ABC exporter, ATP-binding
protein CcmA"

```

```

/product="heme ABC exporter
ATP-binding protein CcmA"
/translation="MLECENLSCTRNNKVLFKNLSFKAELKSKILITGPNGSGKTSLI
RSLSGLLPVSGNIRHCGKDIYDDPKSYISSMVYIGHKNACKDSLTV AQNVEFWAGIR
NTRELIVAAICCLQLQPVLNIRYGELSAGWKRRVALARLLISNANVWLIDEPFCNLDS
ATCELVLNLISIRSEQNGIVIITGHSSTEQLCDFTTIDIRDFNRLLA"
/besthit="qcoverage 100 , hcoverage 100 , similarity 100
, identity 100 , eval 5.54e-148 , alnlength 207 ,
Bacteria , Proteobacteria , WP_015589045.1 MULTISPECIES:
heme ABC exporter ATP-binding protein CcmA [unclassified
Wolbachia]"
gene 54420..55715
/locus_tag="wEsol_00837"
CDS 54420..55715
/locus_tag="wEsol_00837"
/codon_start=1
/transl_table=11
/fullproduct="qcoverage 100 , hcoverage 100 , similarity
99.8 , identity 99.8 , eval 9.95e-284 , alnlength 431 ,
Bacteria , Proteobacteria , WP_006280467.1 MULTISPECIES:
sodium:proton antiporter [Wolbachia]"
/cog="NhaC COG1757 485 Na+/H+ antiporter"
/pfam="Na_H antiporter CitMHS Na_H antiporter CitMHS"
/product="sodium:proton
antiporter"
/translation="MTAFVPLIIFLILYLGSGAYFSFIGTDNPLHQVSPVICLLPALF
FAVSRGTNKIQHNIDTVIKGMGDKNTLTMCLIFLFGAFSAVTQSIGSADTVANLILN
FLPARLLLPGVFLASAFISTAIGTSMGVVALMVPIAVNLA KSGAFGLEIGTATVVGGA
VFGDNLISMISDTTIA SVSSQEASAKDKLKMNSKVALIASIITLIYLAVASNSTKIISI
SNLDYYSIIKIIPYISLIIMGLLEVATLVTITINIIAGVLGITFFDYAIIQFPHDVY
DGFKKVNEIVIFALFIGGLSHIMYKQGQKALHKLIDESNITKTAEFVIVGIASMFTT
LVANNTIAILLSGGIAKRLAQKHSIAPHRSAYLLDV FACATKGILPYGSQ LLLAGSIA
SVSPISLLTQVYYCFILAAVTIGEIIINSRKEKHCAAAT"
/besthit="qcoverage 100 , hcoverage 100 , similarity 99.8
, identity 99.8 , eval 9.95e-284 , alnlength 431 ,
Bacteria , Proteobacteria , WP_006280467.1 MULTISPECIES:
sodium:proton antiporter [Wolbachia]"
gene complement(56604..56945)
/locus_tag="wEsol_00838"
CDS complement(56604..56945)
/locus_tag="wEsol_00838"
/codon_start=1
/transl_table=11
/fullproduct="qcoverage 100 , hcoverage 100 , similarity
100 , identity 100 , eval 1.53e-79 , alnlength 113 ,
Bacteria , Proteobacteria , AAS13810.1 transposase, IS5
family, OrfB [Wolbachia endosymbiont of Drosophila
melanogaster]"
/cog="COG3293 COG3293 124 Transposase and inactivated
derivatives"
/pfam="DDE_Tnp_1_2 DDE_Tnp_1"
/product="transposase, IS5 family, OrfB"
/translation="MRTKYTKVKKMWADMGYQGRNLKNHIKEEYDIDIEIVKRPPCRF
WVHKDTPPELLPTREQGFKVQPRRWVVERTFAWVNRNRRLSKEYDLLTTSTENFIYLA
MSRVMLKREYA"
/besthit="qcoverage 100 , hcoverage 100 , similarity 100
, identity 100 , eval 1.53e-79 , alnlength 113 ,
Bacteria , Proteobacteria , AAS13810.1 transposase, IS5
family, OrfB [Wolbachia endosymbiont of Drosophila
melanogaster]"

```

```

gene      complement(57056..57436)
          /locus_tag="wEsol_00839"
CDS       complement(57056..57436)
          /locus_tag="wEsol_00839"
          /codon_start=1
          /transl_table=11
          /fullproduct="qcoverage 100 , hcoverage 100 , similarity
100 , identity 100 , evalue 1.16e-87 , alnlength 126 ,
Bacteria , Proteobacteria , AOV87106.1 transposase
[Wolbachia endosymbiont of Drosophila incompta]"
          /cog="COG3293 COG3293 124 Transposase and inactivated
derivatives"
          /pfam="DUF4096"
          /product="transposase"
          /translation="MRKKYPTDLSEREWARIEKHFRVSYKKGGRPPKYSKREILEAIF
YVLRGTGCQWRYLPNDFPLWKTVYEQFRQWKKQGIFEKMNYEITKYSRRKIGRNEQPSA
CIVDSQSVKTTEKGGSKAMMEVKK"
          /besthit="qcoverage 100 , hcoverage 100 , similarity 100
, identity 100 , evalue 1.16e-87 , alnlength 126 ,
Bacteria , Proteobacteria , AOV87106.1 transposase
[Wolbachia endosymbiont of Drosophila incompta]"
gene      complement(57646..58533)
          /locus_tag="wEsol_00840"
CDS       complement(57646..58533)
          /locus_tag="wEsol_00840"
          /codon_start=1
          /transl_table=11
          /fullproduct="qcoverage 100 , hcoverage 100 , similarity
100 , identity 100 , evalue 3.36e-211 , alnlength 295 ,
Bacteria , Proteobacteria , WP_155968567.1 MULTISPECIES:
UDP-N-acetylmuramate dehydrogenase [Wolbachia]"
          /cog="MurB COG0812 291 UDP-N-acetylmuramate
dehydrogenase"
          /pfam="FAD_binding_4 MurB_C"
          /tigr="TIGR00179 murB 290
UDP-N-acetylenolpyruvoylglucosamine reductase"
          /product="
UDP-N-acetylmuramate dehydrogenase"
          /translation="MLISLPKVRGIYRYDVLMSKATWLVNVGGRADVLFKPCDIEDLTY
LIKNTLPVSVIGATSNIIVRDSGIRGITVKLGKEFAYIKSKGNNSIVAGGAVLLSNL
SHFAGNQQISGLEFLVGIPGTVGGGIEMNAGAYGSDIASVVQSIKAVNLEDGNLYEFS
SEEMGYFYRGHSLKGNWIFVEAEFKGVNSEYELILQRLKEVIERKNKSQPIRGKTAGC
IFKNPKNYRAWELIDKSGCLGLNIGGARISQKHCNFLNLDNATASDLENLGNKVKDA
VKDKFNVELEWEIRVLGSY"
          /besthit="qcoverage 100 , hcoverage 100 , similarity 100
, identity 100 , evalue 3.36e-211 , alnlength 295 ,
Bacteria , Proteobacteria , WP_155968567.1 MULTISPECIES:
UDP-N-acetylmuramate dehydrogenase [Wolbachia]"
gene      complement(58524..59402)
          /locus_tag="wEsol_00841"
CDS       complement(58524..59402)
          /locus_tag="wEsol_00841"
          /codon_start=1
          /transl_table=11
          /fullproduct="qcoverage 100 , hcoverage 100 , similarity
100 , identity 100 , evalue 3.89e-204 , alnlength 292 ,
Bacteria , Proteobacteria , WP_010962666.1 MULTISPECIES:
hydroxymethylbilane synthase [Wolbachia]"
          /cog="HemC COG0181 307 Porphobilinogen deaminase"
          /pfam="Porphobil_deam Porphobil_deamC"

```

```

/tigr="TIGR00212 hemC 293 porphobilinogen deaminase"
/product="
hydroxymethylbilane synthase"
/translation="MLVKIGTRGSKLAVAQALEAKQKLLDSFPNLSIEIVKIKTSGDK
YANANLAEIGGKGLFIKEIETELLENNIDMAVHSLKDMPAFFSGGLTIPCVLERLSSC
DAFISHKHNSLES LPQQATIATSSIRRKVQLLNVRPDLNIVPLRGNVTRLQNQSF DG
IILAEAGLIRLEKHHLLITEVLPPKVMLS AVGQGAVCIQCRNDVKIIDLLEKINNMS
FIGVKSESRFMKTVNGSCFTPLAALAEYVSENMLHLRCMLASGKNIFYTERTSFIEDA
EKMGM DAGLELKS KCL"
/besthit="qcoverage 100 , hcoverage 100 , similarity 100
, identity 100 , evalue 3.89e-204 , alnlength 292 ,
Bacteria , Proteobacteria , WP_010962666.1 MULTISPECIES:
hydroxymethylbilane synthase [Wolbachia]"

```

gene

CDS

```

60462..>60654
/locus_tag="wEsol_00842"
60462..>60654
/locus_tag="wEsol_00842"
/codon_start=1
/transl_table=11
/fullproduct="qcoverage 100 , hcoverage 98.4615384615385
, similarity 100 , identity 100 , evalue 1.23e-38 ,
alnlength 64 , Bacteria , Proteobacteria , WP_155968442.1
MULTISPECIES: hypothetical protein [Wolbachia]"
/translation="MSLNYHNLKEHPRNFRDVTGLKIEEFKVVVEKVRPEWEK VQEQK
KCHGR TSRLPVLEDKILCII"
/product="hypothetical protein"
/besthit="qcoverage 100 , hcoverage 98.4615384615385 ,
similarity 100 , identity 100 , evalue 1.23e-38 ,
alnlength 64 , Bacteria , Proteobacteria , WP_155968442.1
MULTISPECIES: hypothetical protein [Wolbachia]"

```

ORIGIN

```

1 aagagcgttt agacttgatc gaaactgcag ctcaacgccc agaagtaa at acagatttta
61 gcacaagcga taaatatatt tctgattata tccgcaaggg aatggaaagc ggtttatcac
121 acaaaaccct cagtggagat gacagtgata tccgagggta tctagttact ccgcatattg
181 taaaacgcat aaacaagcgc gtaactgatt cgtccccaat gcgacaaata tgctccagtc
241 aaagaatctc tactgaaaca ttggattaca ttatagaaga ttttgaccgc gccggtgcag
301 gttggagcag tgaaacagta gatgatgaga acgggtggcaa taagtctaag tatgattttg
361 caaaagatac ggacacgccc aaaatccaaa agatttccgt cacaacttac gagttatatg
421 ctcaaccaca aatatcacia aagttactcg atgatgcgtt tgtcgatgtt gagagttggc
481 tgggtgaaaa gattgccgag acttttagta aggaagaaaag cgaagccttc attaaggggtg
541 agggcacttt tcaacaaaaa ggaatttttag cttatgaaaa tggaaacagt tataataaaa
601 tagagcaagt taaaactgaa aaattagata gtgattcaat aatgatgttg tattactctc
661 tggacgaata ttattccaaa aatgcgtcat ttttgataaa caggagtacg ttgaaggata
721 tcaggctgct aaaatctcaa acaggtcagt atctctggca gccaaagtctg tcgcttgaag
781 ctccagatac tttaatggga ataccagtat atcaatctgc cgatatgcca ccagcgccaa
841 acaatcagct accagtaatt gcgatggcag atttcaaaca agcttataag attgtagata
901 acagaggaat gagaatatta agagactctt atacgaataa accttatgtg aggttttttg
961 tcactaagcg tgtcggcgga gaggttgtaa acaccagtgc tattaatttg ttgaaagtgtg
1021 cgagcaagta ctaaaaactt ccgcagcatc atctttatag ctgatcaaa gcaacacgtca
1081 taccgcgatt cattccataa ctgtacgaac attgtgattt tggcccatca ggaggggtgc
1141 atcccagtg c ttgacacata tagctaaact gacttagatt taccgacagt ttgaaaaaca
1201 aaaattcgtc attccgctac ttgtttagcg aatctatgct gagatatcgc ggcggtatga
1261 cgtaggaaaa cctttcttgg gtttagctata gtttgctata ttatgtgatt ttatttttag
1321 cattgcttct tacattatgt aattttgttt tccataatgt atattatgta attttcgatg
1381 ctaaaatctg ttatagctct cagtatgata tgagtgattc tcttttaata attatttttt
1441 aaatagtttg ttggttcata aattttcttta ggattgatat ctacaattat ttttccggtt
1501 tttaacagaa taatccgata tgatattttt gttaaaaaat ccaaattgtg agaagcgata
1561 atcatagtaa taccatatac tctaactgat tgtaatatgt ccacaacgct gactattgtt
1621 gctacgtcta aaccagacgt tggctcatcg cataatagaa tccttggatt catcattaag
1681 cttctggcaa gcgcaaccgc ctgtttttgc ccaccggata gattactagg gtaatcattt

```

|      |             |             |             |             |             |             |
|------|-------------|-------------|-------------|-------------|-------------|-------------|
| 1741 | tttttagagg  | caatacccaa  | agactcaagt  | agtgaatcac  | tttgatcctg  | agttttgttt  |
| 1801 | ttaagtttgg  | gagcatatgt  | aagattttcc  | cagacagtca  | tatgtgagaa  | aagttgaaaa  |
| 1861 | tcctgaaata  | caaaaccagt  | actatcattg  | cattcaatgc  | taccagaatc  | taaaacttcg  |
| 1921 | agtttttgta  | tacaacgtaa  | caatgttgat  | ttaccactac  | cagaaggacc  | agcaagacca  |
| 1981 | actatagatt  | gttctataat  | cagggttaata | ttattaagta  | ctggaacatt  | attaaataat  |
| 2041 | ttacaaacat  | tatgcatttt  | tatcatatat  | acctttctgt  | tcaatctttt  | tgcctatata  |
| 2101 | ttcaattagt  | aatacaagag  | cgtaataata  | agccccagca  | agacaaagtg  | gtataaaaata |
| 2161 | agtaaattgt  | tctgctgcaa  | gcattttgcgc | agagcgcata  | atatcaacac  | caccaatagt  |
| 2221 | agagattaat  | gccgtttctt  | taaggagtgc  | aatgatctca  | tttatcattg  | caggaagaat  |
| 2281 | atttttaata  | acttgtggta  | atataatatc  | tctccacata  | tagaaaactag | gtatttgtaa  |
| 2341 | agtttttagct | gcttcaaact  | ggttttttga  | tatagtttca  | ataccagctc  | gtaaaaatctc |
| 2401 | agcaatataa  | gcacagctat  | ttagaccaa   | tgctataatg  | ccagcactaa  | atatgtttaa  |
| 2461 | tttaattcct  | gcaatggttg  | gagtcataaa  | ataaacaaca  | cttaactgta  | atataagggg  |
| 2521 | ggtgccacgt  | attacagata  | taattccatt  | aattaatgga  | atacagatct  | tattatatct  |
| 2581 | gagtactgaa  | aataaccctc  | ctagactcat  | acctaaaagc  | agtcctccaa  | tcaataatth  |
| 2641 | taaagtaaag  | gcaaggcctg  | ttccaacaaa  | caagaaatta  | gaaattaatt  | cctgcatcag  |
| 2701 | ttatctccta  | gccatttttc  | tgctattttt  | tgtattacac  | ctttactttc  | taaacttttt  |
| 2761 | aatgcctcgt  | ttattttatc  | ctttaaagca  | gatcctttat  | tcacagcaat  | aacataacca  |
| 2821 | ccatctaact  | tggcagtggc  | tgaacatgat  | agaccaggat  | tttttttgct  | aaatacttta  |
| 2881 | ccttggaatt  | catcaattag  | gacgccatca  | acatgaccag  | actttaatgt  | ttctacagct  |
| 2941 | tgattattat  | tgtctatagc  | aataatttga  | gctgttgtag  | gaacatgctc  | ttttagccaa  |
| 3001 | atthccatga  | cagttcctag  | ttgaacggct  | atcttcttgc  | gagttaagtt  | gtttataaccg |
| 3061 | gctatgggtt  | tatttttggt  | atatagaata  | ccaaattccc  | ctgtataata  | actatttgaa  |
| 3121 | aatcaaaaat  | ttttttcacg  | ctcttctgtg  | ctaccaatag  | tagatatagc  | agcatctaca  |
| 3181 | gaattactth  | gcaatgctgc  | aaatatagta  | ctaaactgca  | tatcttttaa  | tatcgcttct  |
| 3241 | ttacctaaact | cttttgctac  | taattgagca  | agctcaatgt  | caaagccagt  | aaatttacca  |
| 3301 | ttttcataat  | attcaaaaag  | tggataatct  | gcagaaattg  | caaactctaat | gatattatcg  |
| 3361 | tgtttattth  | ccttgcatcc  | tgttaataga  | atacttatca  | ctataatagc  | atthaaaaata |
| 3421 | tatttttttca | tattactaat  | ttatattcat  | atthttattca | tcttatgaat  | atagacatta  |
| 3481 | aaaattgaat  | agtcaagaaa  | taatgaatat  | aatthtcaa   | atacttatta  | catatttcaat |
| 3541 | atgaggaaaa  | tgcataatgc  | atgacaacac  | actaggtgaa  | catattttta  | atattatttca |
| 3601 | aatcacgaa   | atthttagagc | agagcgattt  | acagatcttg  | cttaaaagaa  | gagggcacaa  |
| 3661 | cattcctcag  | gctactttat  | caagaaaatt  | aaaaaaactt  | aaaattgcca  | aagttgctgg  |
| 3721 | tatgtataaa  | gtaattgaca  | tcaaccaata  | tcgattacca  | ttaatactta  | atatgcaaat  |
| 3781 | ttcggtttth  | ggttttaatat | tactacacac  | tcaaccagga  | caagctagca  | gcctagctta  |
| 3841 | ctttctagat  | cagaagtatg  | ttattttattc | attaaataat  | agcaaaaaaca | taggaatttat |
| 3901 | aggaactata  | gcaggtgatg  | atacagtatt  | attgatcatc  | aaaagtaagg  | ctgaacttaa  |
| 3961 | caaagtatta  | caatcaatth  | atgaaacatt  | tccatattta  | agtcctgaat  | aagaatgttg  |
| 4021 | taagttaaaa  | atgtgatata  | aaggagataa  | gagggatttc  | tttgttttaa  | tctttgtctt  |
| 4081 | cttttttttca | atataacctac | atatcagaat  | ggacaattca  | tatagaatca  | gcataggtat  |
| 4141 | tgcaagccct  | acttggctta  | atacatcagg  | tggagttaag  | attgcagcga  | taataaaaaat |
| 4201 | taccactatt  | gcaattctac  | gtttatttga  | caaactttgt  | gcagtcagta  | gccccactct  |
| 4261 | caccattaat  | gtgagtatta  | ctggaatttg  | aaatgcagtg  | ccaaaagcaa  | acataaattg  |
| 4321 | gagaacgagg  | tctaaatat   | cgctaactga  | tggcataaac  | tctattggta  | taccgaaaga  |
| 4381 | tttcccacta  | tgttcaaaaag | tgatgaaaaa  | cttccaggct  | aaaggaaata  | tatagtaata  |
| 4441 | gactacagta  | gctcccgtta  | caaataaaaac | cggtgttgca  | atcaagtatg  | gcaacaacac  |
| 4501 | tgcccttttca | cttttatata  | accaggtgc   | taagaacata  | taaaattgccc | atgcaaacac  |
| 4561 | aggaaaagaa  | aacaaaagtg  | cgctcattat  | tgcaacttgg  | agatacacaa  | aaaatgcctc  |
| 4621 | tgtaagtct   | gtgtaaatta  | aagaaaaacc  | ttcgctacct  | tttgttgctt  | ctattaaagg  |
| 4681 | tgcgagtaaa  | aaacggtata  | tattttcctt  | aaagtaataa  | caaaaaccaa  | aagcaacgca  |
| 4741 | aaaaaataga  | aagcaaaaaga | taactcttht  | tctgagttcc  | gcaaagtgt   | cataaaatga  |
| 4801 | ggcgtatttg  | cttgagttcc  | agttcatact  | ttactatagc  | tcaataatgc  | tatgtctaac  |
| 4861 | attctcagcg  | aaaaagccca  | ctcattgtca  | taccacgctg  | caaccctgca  | tatatcacct  |
| 4921 | gtaacatatg  | taccagttaa  | atccacaatt  | gcactataag  | ggttatgcac  | aaaatctatt  |
| 4981 | gagactaaag  | gttcctcgca  | tatagaaagt  | acatttgaca  | ttggataacc  | ctctgtcatc  |
| 5041 | ctagtaccct  | ctgatgtcat  | ccgagttagct | gacactggga  | tccagaaatt  | agattccagc  |
| 5101 | gtcatgcgct  | ggaatgacgt  | agaggagaga  | gctgcatcct  | taaatatttc  | attgatttct  |
| 5161 | tcaacggtcg  | ctttcttatc  | agtcgtaaat  | ttaaaatcaa  | ccatagaaac  | attgctaact  |
| 5221 | ggaactctga  | cggcagtgcc  | atctagttth  | cctthtaatt  | cagggatgac  | agaaccaatt  |
| 5281 | gtttttgctg  | ccccggttgt  | agttggcacc  | atagataatc  | cgcaagccct  | tgctctacgc  |

|      |             |             |             |              |             |             |
|------|-------------|-------------|-------------|--------------|-------------|-------------|
| 5341 | aaatctttat  | gattaccatc  | aagaacattt  | tgatcattcg   | tgtaggcatg  | tatagtagtc  |
| 5401 | ataaaaccgc  | tttttatacc  | taaactggag  | tgtaggactt   | tcacaatcgg  | agcaaggcaa  |
| 5461 | tttgtagtgc  | aagaacctgc  | tgatatcact  | ttatgctctt   | tttcgagcat  | atcgtcattc  |
| 5521 | acaccataaa  | ctatagtgc   | atcagcatcc  | ggaactggag   | cagagacaat  | tactttctct  |
| 5581 | gcattgtgcc  | ttattgcttc  | ttcacgttta  | ttgaatgcac   | cagtacattc  | aagtattaca  |
| 5641 | tcaacattcc  | aaggaatatt  | ttcaggattc  | cgttctctat   | ataaagaaaa  | ctttttgcc   |
| 5701 | tttatagaaa  | tccaattttg  | agactcatta  | aaatcaatat   | caccactgaa  | tttgccatga  |
| 5761 | acagaatcat  | atttaaatcaa | atgtgcatgc  | tgctttgcac   | tgagcgatcc  | attgacagct  |
| 5821 | acaacttcta  | tttgtttgct  | atattcttct  | atttcgaaaa   | tagcacgcaa  | tacgcctctg  |
| 5881 | cctattctac  | ccagaccatt  | aattcctacg  | cgaaccgtca   | tctcttcatt  | caaaaaattt  |
| 5941 | aattatagag  | gatatacatt  | gatatttcat  | tctattcttt   | tgcttttcta  | tcgatatgaa  |
| 6001 | cattatagca  | aggagacagg  | gctaaaaact  | tgcttgacaa   | actccgccag  | cgcccttatt  |
| 6061 | atgaaactga  | agctattgta  | tttgcttttcg | ccaatctgca   | gattaaaagg  | taaggattac  |
| 6121 | ttaatgtatc  | ggcgtcttat  | gttcaatttt  | ttgcagtata   | tagatactgt  | atgtctttac  |
| 6181 | aaaacttcat  | ctacatctag  | atttttatct  | aaataagctg   | aacgcgctta  | taaagcgtaa  |
| 6241 | caagacatca  | aaaaatgcc   | atactcgaca  | gagatagtaa   | aagactagct  | aactcgggga  |
| 6301 | ttctttgtct  | ttttttctgc  | ttagtaaatt  | tcttaaacgt   | ttgcagcgta  | agttagtgtc  |
| 6361 | aattaaaagc  | agctgaattt  | cgcttgtaaa  | gcgttttaaa   | cataaaaaac  | gccaatattt  |
| 6421 | taaagcagat  | aataacccca  | gggcttcttt  | tgcttttttt   | tttcattttg  | taaatttctt  |
| 6481 | aatgtttatg  | gctaaacgac  | aaccgctcatc | ccgctgcttg   | ttagcgggat  | ctcttgtag   |
| 6541 | cggctgagat  | accgcgaatg  | aatcgcggta  | tgacgtagat   | tgctgtcatt  | ccagtgtctc  |
| 6601 | tttttttgct  | atcccagtgt  | ctgggcactg  | ggatgacagc   | tagcctgaca  | accgtcatcc  |
| 6661 | cgctacttgt  | tagcgggatc  | tagagatacc  | gcgaatgaat   | cgcggtatga  | cgggtcgtgg  |
| 6721 | cggcgtgacg  | ataacctcgt  | catcccgatg  | cttgtagcgt   | ggatctatgt  | taaggtagta  |
| 6781 | cggttaagta  | agggatctat  | gttaagagat  | accgcgaatg   | aatcgcggta  | tgacggttaa  |
| 6841 | gtagggtgtc  | atcccagtgc  | ccagacactg  | ggatccagga   | attttattaa  | gttggttaagc |
| 6901 | ataaaaagtag | ccgttttacg  | ttacaataca  | atgttttgat   | gattatggaa  | aggctggatc  |
| 6961 | ccagtgtcaa  | gcactgggat  | gacaaaaaaa  | ggaggctact   | cggatgacag  | gagaaggtag  |
| 7021 | tgccgtcata  | aaggaaccag  | tttcagctac  | tttcatgaca   | tcgttgtaac  | attgtaccat  |
| 7081 | attacaattt  | agcgttttta  | gtaactaaga  | aaagtgtctc   | ccccttttag  | agcactgcat  |
| 7141 | ataatagatt  | tgacattgca  | gtgcgttgtg  | caaacagaat   | tcccaatact  | ataacctaca  |
| 7201 | ggaggcctta  | tgaataagaa  | atttctctat  | tcaccattgt   | caataaaaaa  | tataggagaa  |
| 7261 | aacggtgtat  | tttctgggta  | tgcgagcggt  | tttaacatag   | ttgataaaca  | aatgatctg   |
| 7321 | atattgccc   | gagcatttta  | ggaaaattta  | aacagaaata   | aaataaaaact | cctttggcag  |
| 7381 | cataatcctg  | acgaacctat  | aggtagcatc  | atagatatatt  | atgaaaatga  | tggtggcctg  |
| 7441 | tatataaccg  | cacattttact | tttggttatt  | cagaaaagcag  | aagaagtgtg  | tttgatgctc  |
| 7501 | aaaactgggg  | caattaacgg  | actttccatc  | ggctatatatac | ctatagagta  | tgatgttgat  |
| 7561 | cataaaagtg  | gagctagagt  | gttaaaaaca  | gtggaattat   | gggaagtcag  | tttggtcact  |
| 7621 | tttcttgcaa  | acttggtgct  | tcaggtaatc  | aatgtgaaaa   | atcagaacaa  | tgaacaggaa  |
| 7681 | gtgttagcaa  | gagcgataga  | aaaagcaaat  | gctgtacttg   | cagacatgta  | catttctgct  |
| 7741 | taaagtgtat  | taggcgggca  | aagactttac  | cataatttga   | cacctgtgtt  | agtatttgtt  |
| 7801 | taacattttat | actaatatat  | ataactttat  | tactattaaa   | attttctgta  | aattaaagtt  |
| 7861 | aaaaaataag  | gtaattttat  | gctaaatatt  | aataataagg   | ttaattatga  | aattaatatt  |
| 7921 | aagcgaaagg  | aaaaaaaaata | cagctgggtc  | actgtatttg   | cttggttata  | tctaaaaacg  |
| 7981 | attggacgaa  | tattgcccga  | gagatgggat  | agatggggcag  | aaaatatttt  | gtactacgat  |
| 8041 | aaaactactg  | caaacaatga  | agttcaaaact | gatgctttta   | agacaataga  | tggaagtgtt  |
| 8101 | caagttgact  | taaaacctga  | agtagcagta  | agagagagcc   | aaagtggagt  | aataagtaag  |
| 8161 | gatggagagg  | ttcaaaactaa | taaagtaaca  | tttcacgata   | tagcaatgca  | gaccgaatac  |
| 8221 | gtcgaaacaa  | cggataaaaa  | tagtgatcaa  | gcacagcagg   | ttgaagactt  | acaatcaaaa  |
| 8281 | aatggccttat | tggaagtga   | aattgaagaa  | ttgcgatcta   | taatcataag  | gcttaaagcg  |
| 8341 | gacttacaat  | caaaaaatag  | ctcgttaaaa  | aaggaaaaata  | gagaattgca  | atctataatt  |
| 8401 | ataagactta  | aaaagaatta  | tagagaattg  | gtagaagtta   | cagataaaca  | agagaaagag  |
| 8461 | tttttagtaa  | agttgaaggc  | aaaatctgag  | atgatagggg   | gccagggaag  | agaattaact  |
| 8521 | gaactcagag  | cagaattttac | caataaaaaa  | aacgagcttt   | ttgaaagggg  | ggaagaagtc  |
| 8581 | aggaaagaaa  | aatcgaagaa  | aaaaaaagaa  | gagttacaag   | agcaagttga  | acatctgaat  |
| 8641 | gcaaaattag  | aaagagcaag  | aaatgttgca  | atattttcta   | ttggagagcg  | tacaaaaaca  |
| 8701 | cttgatgaaa  | atctgacatt  | aaaaaatcaa  | caaattgaaa   | gttcaccagc  | taaagatgaa  |
| 8761 | caacaaaatg  | ggaagttaac  | agagaaagat  | acacaagggc   | aaacaaaaac  | taaagcgcca  |
| 8821 | gatacagtga  | gtacagtatc  | tactgcaaaa  | tcaactactg   | gttctatgaa  | gtcaaaaattc |
| 8881 | caaaggggtt  | atctaagctt  | cgtgggaatg  | agaattgcga   | taaattttta  | tctgtgaaaa  |

|       |             |             |             |             |             |             |
|-------|-------------|-------------|-------------|-------------|-------------|-------------|
| 8941  | aacgaggagt  | taaaaaaagg  | ttttcctgaa  | tttaaagaga  | aacactttttg | ccataacgtg  |
| 9001  | cttaatgaaa  | ctataaagtc  | tctatcaa    | caagatgatg  | gcaaattttga | aagcagtaag  |
| 9061  | ctgcttgaat  | tattagaaa   | taatttgaaa  | caatccgcaa  | gggagatcat  | agaagctaag  |
| 9121  | gttaaagaag  | ttgtcaacga  | acattgtaat  | accaattctc  | actgcacaac  | aaacagatag  |
| 9181  | acaataatgg  | aaaaaaagcc  | atactaaact  | aagtgttaata | gcgagggtata | aatggcatta  |
| 9241  | agatcaaaat  | tattggatga  | aaaagtagtg  | gaatcggcaa  | aagcaatgct  | gaagaaagta  |
| 9301  | agaaacaacg  | catacgttac  | aaaaaaacta  | aatgctgtaa  | ttgcagcaaa  | aaagcacagc  |
| 9361  | ataacagcgg  | tagcaaagat  | atgtttgcatt | tcaagaactg  | cactgactgc  | gtggataaag  |
| 9421  | cacctaaaat  | ttaacagaga  | ggaaaaattg  | tttgctcccc  | ctcaacgtcg  | tagaaaaact  |
| 9481  | agattgaatc  | aaagtcaacg  | tgaacaagtt  | gaagcatgga  | tacaagaaaa  | tcctaataatc |
| 9541  | accattaaag  | aaatgagaat  | aaaaatccag  | gaaagatttg  | gttttgatat  | cagtaagtcc  |
| 9601  | acagtacacc  | gtaatatgca  | aagaatgaaa  | ttctcatata  | ttactccaag  | accagttcat  |
| 9661  | aatgggtcaag | ataaaagcaa  | acaagaggag  | tttaaaaaaa  | aatctcaacg  | aaactatttg  |
| 9721  | caaatatcca  | gaaaaagagc  | tatttttctt  | tgatgagtct  | cggtttgga   | cacattcaaa  |
| 9781  | aattggacat  | gggtggttta  | aaaaaggcat  | taggacacag  | gttaaaataa  | aattaggtag  |
| 9841  | gcaaaatttc  | tatctctata  | gtgcggttaa  | tcctagaaat  | ggagagagtt  | ctagctcaaa  |
| 9901  | tgtcaacact  | gattgcatga  | atatatttct  | tgagcagatg  | tcgcaatatc  | taggaatacg  |
| 9961  | agagactttt  | ctcgttatgg  | actgtgctag  | ttggcatagg  | tcaaaaaatt  | taaaggtacc  |
| 10021 | taaaaatata  | gatattatat  | acctacctcc  | atactcacct  | gagctcaatc  | ctggtgagag  |
| 10081 | gttttggtta  | tatataaaac  | agaacatttt  | gtgcaataaa  | atatacgata  | caattaccct  |
| 10141 | gcttgagcgc  | actttgtgta  | aatttgttac  | ctctcttacc  | cactccataa  | ttaaacaact  |
| 10201 | ctgcaatgtc  | tcctatttgt  | cctcctaata  | atgagaattg  | gtataagagg  | ttgtccggaa  |
| 10261 | actagtaaat  | tcaagcatat  | tcctcttcta  | acataaccct  | actcatagct  | aggtatatga  |
| 10321 | aattctcagt  | ggatgtttgt  | agtaaatacat | actccttcga  | tagccttcta  | ttcctattaa  |
| 10381 | ccaagcaaaa  | agtcctttct  | acaacccatc  | ttcttggtcg  | tactttaaac  | ccttggtctc  |
| 10441 | ttgttggtag  | tagctcaggt  | ggcgtatctt  | tgtgcacca   | aaatctacat  | ggaggccttt  |
| 10501 | taacaatttc  | aatatctatg  | tcatattctt  | cctttatgtg  | attctttaaa  | tttcttcctt  |
| 10561 | ggtatcccat  | gtcagcccac  | atTTTTTTTaa | ctttagtata  | ttttgttctc  | atattgttta  |
| 10621 | atgctatttt  | aataccatct  | ctatcatttt  | cgttagcagc  | gcctacgtaa  | caacctagta  |
| 10681 | taaaaccctg  | agtgtctgta  | attatatgcc  | tttttctacc  | ctttactttt  | ttacttccat  |
| 10741 | catagccttt  | gatccccctt  | tttctgtagt  | ctttacagat  | tgactatcta  | ctatacaggc  |
| 10801 | actcggtcgc  | tcatttcctt  | ctatttttct  | tctactatat  | tttgtaattt  | cataattcat  |
| 10861 | tttctcaaaa  | attccctgct  | tcttccattg  | cctgaactgc  | tcatacacag  | tcttccatag  |
| 10921 | cggaaaatca  | tttggtaaat  | accgccattg  | acaccctgta  | cgcaatacat  | agaaaattgc  |
| 10981 | ttctaataat  | tctcttttgc  | tatacttttg  | cggccttcct  | cctttcttgt  | atgatactct  |
| 11041 | gaagtgtttt  | tctattcttg  | cccattccct  | ttcgcttaga  | tctgttggat  | acttttttct  |
| 11101 | catctttacc  | ccgtactaaa  | atttcagata  | ttatagcctt  | ttacttattt  | ccggacaacc  |
| 11161 | tctaacattg  | gaaaaaatat  | gggtaaagaa  | ctacgagatg  | acacgttaaa  | agccaagtgtg |
| 11221 | tcaccttctg  | ttagaaaatg  | cgtaaaaaaa  | ttagaattta  | acaaacaaga  | aggggtaaat  |
| 11281 | aagattgtag  | actctatctt  | gcacagcttt  | aatagcaaga  | ataataataa  | taacgactca  |
| 11341 | ggagaattgc  | ttaaagaaat  | tgttacagga  | aaattaacag  | aggctaaaaa  | gaaatgtttt  |
| 11401 | tcaataaaga  | ttcaagagtt  | acaactggca  | ttaagcataa  | gagataaatt  | tttatctcca  |
| 11461 | gatcagggaa  | tgtgtaatac  | aactcaagga  | ggagtaaacy  | aatatcaatt  | aacagaaaaa  |
| 11521 | gtaaaaaaag  | aacatatacc  | taattcctct  | atgagttccc  | ctaataattg  | aagcatacat  |
| 11581 | tcattgaaca  | gtcagaaaagc | agttagaata  | ggctcttagc  | ataaagcacc  | agctcctctt  |
| 11641 | ttgttaaagt  | gtaggagcta  | tcttcccaat  | gttggttttag | caattccaag  | tttctaccta  |
| 11701 | aacttttttc  | tggtctggtg  | cctataccta  | tcaagtcatc  | accagataaa  | ggaaattttg  |
| 11761 | gaatattgaa  | tgtattagca  | aatgaaatat  | attcatcaac  | attttctcca  | gactcaacac  |
| 11821 | cacaaattct  | tactaaatca  | caatataatt  | ctctaccaaa  | taaagatatg  | tatttttttt  |
| 11881 | gctctttttc  | tgaaagttct  | gttttgatat  | cgttggatag  | taaaaaatag  | agctttttct  |
| 11941 | tttgcttggt  | cgaaagacgt  | agaaacatga  | ttatgtattc  | tccaagactt  | agcctgtcat  |
| 12001 | tttttttagt  | agtcctaagg  | agtaacgcta  | attttactag  | cacatcagtg  | ccgaaaagaa  |
| 12061 | gtgacgaaga  | cagaatttcg  | cattttactt  | cttttgggat  | aatcttttgc  | aaaacatcag  |
| 12121 | attcttgcac  | gctcttaagt  | gttggaagaa  | gatcattgca  | ctccagcaat  | ttaagtattt  |
| 12181 | catctcttat  | tctctctcca  | gagaggtttt  | ggatcatatg  | cgaatgcttt  | ttgcatacgc  |
| 12241 | ttagtatttc  | atcactcaaa  | tctccggcac  | atatttttgc  | atgaaaacga  | aatgctctta  |
| 12301 | aaatacgtag  | atagtcttct  | ttaattctat  | cttcagcggt  | gcctataaag  | tttaaccttc  |
| 12361 | gcgcttttaa  | atcctcaatg  | ccaccaaagt  | agtcataatat | atggccatgc  | ttatctgcat  |
| 12421 | atagagcggt  | aaatgtaaag  | tcacgccttg  | aagcatcagc  | ttgccaatata | ttggtaaatt  |
| 12481 | ctactttttgc | atgcctacca  | tcacatttca  | catcatgcct  | tagtgctcgt  | atctcaaaag  |

|       |             |             |             |            |             |             |
|-------|-------------|-------------|-------------|------------|-------------|-------------|
| 12541 | acctctgatt  | taagattgca  | gtgatagttc  | catggtttaa | gccagttgga  | atagttttta  |
| 12601 | tattacggag  | tttttagcgt  | ttcatcgtct  | gatcaggaag | caaattagta  | gctaaatcga  |
| 12661 | tgctgtggac  | atcacgttgc  | aaaattgagt  | ctctcacaca | tccgccgaca  | agcctagcct  |
| 12721 | caccaccaa   | ttcctctatg  | gcatcaataa  | ttaaactagt | ctcctgggtca | acttgcattt  |
| 12781 | aggtttagtac | atactgcaag  | ttcatattat  | atgaaatgct | tgcacaaacc  | cctatataaa  |
| 12841 | aatatacagg  | gctatgaaga  | tttatttttac | acttcaattg | tgatatttgt  | tgttgatgaa  |
| 12901 | atattttttc  | tgttccttgat | tcctccatac  | tacatcttgg | taagcttgaa  | gggttttgc   |
| 12961 | tttcagagcg  | ctctatgctg  | tgctttatat  | cactaacgca | ctgccctaca  | acatcaccaa  |
| 13021 | tttttccatc  | agcattttct  | gccaataact  | catcaaactc | cttcttaacc  | tctgctctct  |
| 13081 | cagagatatc  | ctttgaaagg  | ttacaatact  | ctaagatctc | atctaactgc  | agcttttttg  |
| 13141 | ctaataggaa  | atcttcttgt  | tcttgttttg  | ctaaactttt | atctctatca  | agcaatgggt  |
| 13201 | caaaatgagc  | atgtcctttg  | tttattacat  | gcaaaacact | actgtcgtca  | taattaactt  |
| 13261 | tattgtattc  | acctgcactt  | tttgaacctg  | aattgtctat | taattcatgc  | aaaaacaaat  |
| 13321 | cttgggttatc | aacagtctgg  | ttctctataa  | catgcaattt | tacatcatac  | ttctgacaaa  |
| 13381 | gtattctgcc  | ttcaacgtca  | ggatcacccc  | acctatcgtt | acgcataatg  | tttgctgtat  |
| 13441 | aatcatctac  | agtttcacta  | cggtgctggc  | cattgttatc | atgactattg  | acaattgcat  |
| 13501 | ttgtaaacca  | ctttggtgga  | ttcttttgtg  | caaattcttt | acagtcttct  | cgtaactgct  |
| 13561 | caacagtaac  | ttctatcccc  | ttctgctgtt  | ctagaccttg | tctgaatgag  | tcaaaaaagc  |
| 13621 | agcttccatt  | accaattgct  | tgctctacat  | ggaaattgtc | agggtaagga  | ttactattta  |
| 13681 | aaagagttat  | ttcttgtcca  | gagctcttga  | accttttcgg | acttccagta  | tcgtaaaaat  |
| 13741 | catttgatag  | tttccgtttc  | ctaggttcag  | ccatagtttt | taccttaatt  | taagctatat  |
| 13801 | gttactatac  | caacaaaatt  | attaataagc  | aactaattaa | gtatagcaga  | aattttttaa  |
| 13861 | ttatgcaata  | gttataactt  | taaatagcaa  | atatgagctt | taactgcggt  | atagttgggt  |
| 13921 | taccaaacat  | aggaaaatca  | accttattta  | atgcgcttac | agagtcaagt  | gcagccgaag  |
| 13981 | ctgcaaatta  | tcctttctgc  | acaattgagc  | caaatatagg | caagatttcg  | ataaaagatc  |
| 14041 | agcgtttgaa  | acaaatcgca  | gcaattgcag  | gctcagagaa | gataatttat  | aatcaattag  |
| 14101 | aagttgtaga  | tattgcaggt  | ctggtaaagg  | gtgcgagcaa | aggtgaaggg  | ctcggcaata  |
| 14161 | aattttttaag | ccatatcaga  | gaagttgatg  | ctatcgttca | tctgctcagg  | tgctttacgg  |
| 14221 | atgacgatat  | cagccatgta  | cacagtaaaa  | tagatccaat | atcagatgct  | gaagtggtag  |
| 14281 | aaatggaatt  | aatcctagct  | gatattgata  | gcatagaaaa | aaggcttcct  | caattggaaa  |
| 14341 | agaaagcaaa  | gcaagggtgat | aaagagctaa  | agagacaact | tgaattaatg  | caagaggtat  |
| 14401 | tagctacttt  | aaaattaggt  | aaacctgcaa  | gaagtttgga | gaatatcaat  | gaagatgaga  |
| 14461 | tgaagttgct  | tcaattgctg  | acaacaaagc  | ccgttatgta | cgtttgcaat  | gttgaagata  |
| 14521 | caaagtgtat  | aactggcaat  | gaattatcta  | aaaaggtaga | gagaatggca  | gaggaaaata  |
| 14581 | aaagcaaatt  | ttattgcatt  | tcagcaaaac  | tcgaagcaga | tattgcaaat  | cttgatagtg  |
| 14641 | aagaggaaaa  | acagagtttt  | ttatcagaat  | ttggcttaca | agaatcaggc  | cttgatggag  |
| 14701 | tagcgcgtat  | tatgtatgaa  | gtgctgagta  | tgataacttt | ctttactgtg  | ggccccaag   |
| 14761 | aagcacgggc  | atggccagta  | aaaataggg   | caacagccga | taaagcagca  | ggtgtaatcc  |
| 14821 | acactgattt  | tgagaaaggc  | tttataaaa   | cagagacaat | aagctttgca  | gactacataa  |
| 14881 | agtatggaag  | tgaatcagct  | tgcaaagacg  | caggaaaaat | tcgctttgaa  | ggcagagatt  |
| 14941 | acatcgtgca  | agatgggtgat | ataatgcact  | ttaggtttaa | tgtgtagttt  | attatgcagc  |
| 15001 | cacttattta  | aagttaagtt  | ttctggatcc  | cagtgtctgg | gcactgggat  | gacaagaaag  |
| 15061 | ggagcactgg  | atttttgttt  | caatatttgt  | acattagcca | tgcatctgaa  | cagatacctc  |
| 15121 | ccctaaacgg  | atacactgta  | gaaggatagt  | ttcttctccc | cagtaaagac  | taaattccag  |
| 15181 | actggaatga  | cagcagtcct  | atgtcatacc  | gcgattcatt | ccatagctgt  | acgaacattc  |
| 15241 | atttttgaag  | gtaaattgca  | cagcaaatgg  | tcagtgtctg | gcactgggat  | ccagttttcc  |
| 15301 | atataatctc  | atcgaaaatg  | ttgtaaccac  | tttctatgct | agtttgcttg  | cttacaagca  |
| 15361 | aactttttctg | gatccaagta  | gtcagggcac  | tgggatgaca | tcctccctag  | cggagattgc  |
| 15421 | tctcaaatca  | caatgttcgt  | acagtaagca  | ctgaccactt | tgcttcaata  | tttgcgatgc  |
| 15481 | ccctgaacag  | atacaaaaaa  | tctattattt  | ttttataaat | taaatcctaa  | ggcatttttt  |
| 15541 | actgtagatt  | aatcatttga  | ttatagtatc  | attttaatta | agcttatgtt  | ttgaacattt  |
| 15601 | atgaaaaata  | ttttataatt  | catactatta  | gttgttgtat | ttggatcact  | gagcctgttt  |
| 15661 | gccatagagc  | agcgtgaaga  | aaagaaaatt  | gggtcagttc | ataaaaaacg  | aaatgtaggt  |
| 15721 | gcaagaaagc  | aagattttact | gagcagtaca  | aatcaaaaag | atgagttgaa  | aagcaacgtc  |
| 15781 | gatgctaaac  | aaacacaaga  | ggctgagagc  | aaaagattag | acggcactac  | cgataaagag  |
| 15841 | aagctgcaac  | acaacgagaa  | caaagcttcc  | gtggttgaaa | aaactataag  | tgaggggtgaa |
| 15901 | aagattgata  | aagatttgcc  | aatgaccag   | ctagaaggaa | gcacagacaa  | atthgtctca  |
| 15961 | aattttacca  | atatggccaa  | taaagaagtg  | aataaagatt | tgaaaccaga  | gcctttgcct  |
| 16021 | ttaagtgtctg | attttaaata  | gaatacaact  | gacccgcaaa | aaaatctaca  | agctgatcag  |
| 16081 | aagattgata  | taaaagataa  | tgaactttca  | aaaagtgatg | cgagtcaatt  | attagagggga |

|       |             |              |               |              |              |              |
|-------|-------------|--------------|---------------|--------------|--------------|--------------|
| 16141 | aaaaaagaaa  | aagtagagaa   | tcagtctgaa    | gaaaaaaaaag  | tgaaagaaac   | aaacagtaat   |
| 16201 | tccaaggacc  | gcaatagagt   | aaaacctata    | actaaaaaag   | atgaaagtga   | aaagaaaaat   |
| 16261 | ttacaaaaat  | ggacaaagct   | aaacagagaa    | ccaataaaaag  | aatgggggtca  | taaagacata   |
| 16321 | caaagcaagt  | caatatataa   | acgacaatat    | gatagcctta   | atgagcatct   | tcctacaact   |
| 16381 | gtgttttattg | atgattacag   | taagcaatth    | ttttactgca   | ttaagaagaa   | caacttaact   |
| 16441 | tgcttaagag  | gagtaataag   | taagctagaa    | aaaattggat   | taacaattca   | agagatacta   |
| 16501 | aggttttagaa | ataaattggg   | tgatactcct    | ctcattttatt  | cagttaaaca   | aggtgaggtta  |
| 16561 | gacatagtgc  | gctttctctt   | attacaaggt    | gctgatctta   | gagtagttaa   | caataattht   |
| 16621 | caatcccca   | ttgatatagc   | aatcgaaaaa    | aagcagatca   | atataataaa   | tgcgattggc   |
| 16681 | gaaatgatgc  | cacatcttht   | ggaggataga    | aaaatagaca   | ataaagaaag   | ctcagcaatg   |
| 16741 | tacgattggg  | ctgtgaaaa    | gaaagaaaa     | aatgagtcgc   | agtgtgataa   | gcaagatgat   |
| 16801 | tagatthttht | atattaatth   | tagttgggtca   | tttatgttat   | ggaaacgaaa   | caaagatga    |
| 16861 | aaaaaatcag  | attagtgaat   | ttttaaacgc    | tctgcatgat   | gtaaaatacg   | tatcttacag   |
| 16921 | taaaaaagac  | tttgctgaat   | ttttgggtgca   | gtgccacaaa   | gagggcggtgc  | cagaagatth   |
| 16981 | taagaaaggt  | tttgggttcta  | acttaaatgg    | agctaathtth  | aaccaactgt   | acctaagtaa   |
| 17041 | atctgtthtth | gatggagtaa   | gtctgattgg    | tgccgathtth  | tctaacaccg   | atthtatccga  |
| 17101 | tgtgtcttht  | attgatgttg   | atthtacgtgg   | tgctaathtth  | tccaatgcta   | atthtacatgg  |
| 17161 | cattaaaaata | aaaggtacaa   | atthtgagtht   | tacaaaaatth  | gtthtctgcaa  | acttaacaga   |
| 17221 | tatcgtatth  | gatcagtcta   | atgttagtta    | tgctgathtth  | atcagthtccg  | atctcaaaaa   |
| 17281 | agtaagtatg  | cacaacgtaa   | ttggthtggca   | tactaathtth  | tcgaatgtga   | aatgaatth    |
| 17341 | ctccaactta  | tcaaactcga   | atgttagcca    | cgtaaatthtth | agtgatagtga  | aaataaacga   |
| 17401 | taccgttatg  | cagaaaaaca   | accttgataa    | tgcaagthtth  | tttggagtgg   | atgcatataa   |
| 17461 | attaaagata  | caatthtctt   | cattaaaaaa    | tgctaacata   | tatgggtgcag  | agttaaaaaga  |
| 17521 | atcagactth  | acaggttagca  | atctthtccga   | tgcttgctctt  | aattctthtcta | tcataatthaa  |
| 17581 | cagtaactth  | gacgaaacta   | atthtaagcaa   | cacacaaatth  | tcctatgtga   | atgacgataa   |
| 17641 | ttcaagthtth | gttcaatcta   | tactaaatgg    | ttccaagata   | aaacatgcat   | atgtthtctga  |
| 17701 | aacaaatctth | caggatgctg   | atthtatccaa   | tattgathtth  | agthtthtagtg | aactgcatca   |
| 17761 | agthtaatgtc | tctaagctg    | acattcgtca    | tggaagthtth  | cataatacta   | aagthtgcgaa  |
| 17821 | ttctaacatg  | aatgggtcat   | ttthtgacca    | ttcactatth   | acctctgcaa   | agatagaaga   |
| 17881 | ttcagacctth | tctacaactth  | caatgtataa    | gataaaaaatc  | caagactctc   | aagthttataa  |
| 17941 | cagtacgctth | tctcgccata   | atattgattc    | cagtgaataa   | gaaaattcaa   | cattctthtaa  |
| 18001 | tttattagct  | gataattcga   | gctgggtctaa   | tttaaaaagta  | actaattcaa   | atthttattga  |
| 18061 | aagcgathtth | agatctthtct  | tgcttcacgc    | taatgcctth   | aggaaaacta   | gtthttthtct  |
| 18121 | tagcaattht  | agtaattcaa   | caattagtg     | tatgtcttht   | ctctctthcaa  | gcataatataa  |
| 18181 | aagthtcagth | gctaattctc   | atthtaacagg   | ttgcaagtht   | gataattcaa   | ttthtgattga  |
| 18241 | caatcaagg   | cagaaaaaac   | ttgcaggctth   | agaaaatgct   | ataactthcaa  | ttgaagatth   |
| 18301 | gcaagagaaa  | atatcacagg   | gtgaaaaatth   | taatgtaaat   | tattctthtact | ttgaatthtaa  |
| 18361 | ggatatgaat  | ttagaaaatg   | ccgathtthtth  | taattcaaca   | ttgagttagag  | caaagthttht  |
| 18421 | aaacgttaat  | ttgaataagg   | caaathtthtga  | aaagaccgat   | ttgcgctata   | ctgtctthtga  |
| 18481 | taactcttht  | ctcattggca   | ccaactthtct   | aaattctaat   | ttagaaggth   | ctagctthtth  |
| 18541 | aaactctgat  | ccaaaaagca   | ccatgtthaaa   | aaatgcaag    | aaaaatgacc   | gtaaaaagtg   |
| 18601 | agggcgatth  | attggtthtcta | tcctccctth    | ctggagctgg   | aaaaactact   | atatcagcaa   |
| 18661 | aattactthga | gcaatcaact   | aatthtagtta   | ggtctgttht   | tatgactaca   | cgcaagctct   |
| 18721 | gccccggcga  | aataaatgga   | aaagactatth   | ttthcgttht   | cgaagaaaaa   | tttcacgagt   |
| 18781 | tatgcaaagc  | tggccaaatg   | cttgaaatag    | ccaaagthtth  | tgagaattht   | tatggtatac   |
| 18841 | caagaaatth  | tatagagcaa   | aacttaagca    | atggaataag   | cgthtthtact  | agcatagact   |
| 18901 | ggcaaggagc  | atthtcaact   | ttcaagctca    | tgagaaaaaa   | agthtgaagt   | gtthttatac   |
| 18961 | ttccccctth  | aatggaagag   | cttaggttht    | gtthtgcaaaa  | gcgtaatagt   | gatgatgcaa   |
| 19021 | gcgaaataga  | gcgagatth    | gccgaagctc    | aaaaagagat   | aagcaaacgt   | gataaatatg   |
| 19081 | attatgtaat  | aatcaatgat   | gatattgata    | aaagtgtaga   | agagataagc   | tccataactaa  |
| 19141 | ataaagaaag  | acttaaaaaa   | ctaaaagaaa    | aaccaagctc   | ggaagactga   | taaaaaacatc  |
| 19201 | aatthtgata  | tttgagctta   | tagthtthtth   | tcctatthtth  | gccagtagca   | cgthtthtgcag |
| 19261 | tttagctata  | tttattatth   | tttaagatca    | aatggtthaaa  | atagtagcaa   | ctgthtcaagt  |
| 19321 | gaggatthtga | ctatgataac   | agatthtthtcta | atagaaaacta  | gtthtthtctg  | ttthccaccta  |
| 19381 | tacatatata  | acgtthtagct  | caatthtaaaa   | gtcaaaactth  | ttggtthgtta  | gtthtagtgct  |
| 19441 | gacaactthaa | atagctthtth  | atattgaggt    | tttagtatgg   | gtatagatat   | aactgcacta   |
| 19501 | actactaatg  | cagataaatth  | aggtgaatgc    | atagataaaa   | ataaaaaagca  | agagcaggat   |
| 19561 | agaaaagacg  | agcaatthtga  | tggcattata    | aagagaaaag   | taaaaaaaga   | agaacacaag   |
| 19621 | cgtgaaaaac  | caagaggtca   | agatggaacc    | ctcaagaagt   | gtaaaaggtth  | atthtgagaaa  |
| 19681 | gatgcttagtc | ctgaagtatt   | aactaaatta    | gaagaatcac   | ttagagaaca   | agaaaaatat   |

|       |             |             |             |             |             |             |
|-------|-------------|-------------|-------------|-------------|-------------|-------------|
| 19741 | tataggtatt  | atgtccaatg  | cttccttcca  | gtgctagata  | aagcaataga  | acgatcgaaa  |
| 19801 | aaaatatcaa  | atgaaacaaa  | agagcagagta | aagcaagcaa  | tttcagaaat  | tacttataat  |
| 19861 | agcaaataatt | gtaaccaaaa  | tgatcgtagg  | gacagtggaa  | ttgaaagtga  | ctacagtagc  |
| 19921 | gatgctggtg  | atgattatga  | gaaacattca  | atcagtaacc  | ctaatacagc  | aatgaagat   |
| 19981 | caagaagtag  | agaaaagcaa  | cggaacaacg  | cataataatg  | ttcaattact  | aaaagcgatc  |
| 20041 | aaaaatggaa  | ataacaggaa  | attaaaaaaa  | tatctaaaag  | attgtacgga  | tattagcagc  |
| 20101 | ataaaaagctg | aagaagggaa  | aaatatTTTT  | cacctcattg  | cgtcgttggg  | aaagaaacag  |
| 20161 | aaatgcaagt  | ttctgggtac  | cctaataaaa  | acggttacca  | aggaagatct  | agcacaactc  |
| 20221 | attaatagtg  | aaaatcagac  | ccctttttcag | gtagcactaa  | ttaacaagggt | aacaaaagaa  |
| 20281 | aaacatgagt  | ctaatacaat  | tcgaagtaac  | gataacacac  | ttaagtttct  | tacaaaattg  |
| 20341 | ttagagcatg  | gagccagctc  | tgataatttta | gaattatcta  | cagaagaatt  | acaaaactta  |
| 20401 | aaagaggagc  | aaaagacata  | ctaccgtaat  | ttcttagaaa  | aattagcaga  | gcaaggaaag  |
| 20461 | aaatctaaat  | taaagccaga  | aataagaatc  | aatacagaag  | caaaaattta  | agaaattata  |
| 20521 | ccacatacca  | taaatactcc  | agatagtaat  | gataattatc  | tattacatcc  | agtaattaaa  |
| 20581 | aatagtata   | aaaaactttt  | taaagaacta  | ttggaaaaag  | gtgcggatat  | tagccttaaa  |
| 20641 | gacacagatg  | gtaacaatgc  | tttacacttg  | attgttaaac  | ctgaaacaaa  | acaaaaactt  |
| 20701 | aaactttctca | atatattgct  | agaaacaggc  | caaaaagaac  | aattttataaa | agctgtaaat  |
| 20761 | gataaaaaag  | aagggcaaac  | accgctccat  | cagatactcc  | agcgcataca  | agaaaagagt  |
| 20821 | aaagagcctt  | cattgaaaaa  | taaaataaaa  | aatgtagtaa  | aaaatgtagt  | aaaaaaagaa  |
| 20881 | tttaaggata  | ctggcaggta  | taaaacctta  | gagttatttc  | tacaaaatgg  | tgcagatatt  |
| 20941 | actgtgcaag  | ataaagatgg  | aaaaaatgct  | ctgcactata  | ttgcttcatt  | caaaggagaa  |
| 21001 | caaaaagtta  | catgtttaga  | gttgatttta  | aattcgggtg  | aaaaagagaa  | atttagtaaa  |
| 21061 | gctgcaaacg  | ccgctaacga  | aaaagaacgc  | acaccactac  | aagtagcgct  | aattactaag  |
| 21121 | acgacaaaag  | ataaacataa  | tttggtcaat  | cctaagagcc  | gtgataacac  | gatcaagttc  |
| 21181 | tgtgtaaaat  | tattgcaaaa  | tggtgttgac  | caaagcagt   | taatactacc  | cgaaagatta  |
| 21241 | tggagcaaag  | agtattataa  | aactataaaa  | ggaatagaga  | aatcaatggg  | tagagcgctt  |
| 21301 | attccagatg  | atatgagaac  | tgaactgaag  | tgcaactttg  | gcaggaagtt  | aaaagcacgc  |
| 21361 | gatattgtga  | agtacatcaa  | taatgttgct  | tgtaaagcag  | tgacaacgct  | tgtatttgct  |
| 21421 | gctttagcct  | gtgcagcaat  | attcagtgct  | tctcaaggaa  | ttattacaat  | tgcaactgcc  |
| 21481 | tcatctatta  | tagcagttat  | tggaagttgt  | tatcttattt  | acttgaattt  | agaaaatatt  |
| 21541 | tatgaaggat  | ttggaaaaat  | taaaggaaaag | tttactgaag  | aaaagcaact  | tacacttcaa  |
| 21601 | gataacgcac  | caaaaaatga  | tacacaatgc  | aataactctg  | ttaaagatat  | agaaaaataag |
| 21661 | tccaacgatt  | tagaagagca  | agaggtgcaa  | aatcatcaa   | atcaatcaga  | gcatactgag  |
| 21721 | agtcctccag  | acactaaaat  | gagtgccata  | tcaataaaact | cgttgaaaaa  | ttgtgtaggg  |
| 21781 | atagtgtaac  | tagtaaaacc  | tcttctctgg  | cgctatgaaa  | tcaatctcac  | cgctcagagt  |
| 21841 | tttttcagcc  | actttttttat | aatcaatttt  | tacgttaatt  | tgccctttct  | tttcttcaag  |
| 21901 | ccacgctata  | gtgtgcttca  | tccagttttt  | gtcatcacgt  | tcaggaaaagt | cttcacgagc  |
| 21961 | atgggcacct  | ctgcttttct  | cgcgattagc  | tgcgcatctc  | atggtaataa  | ccgcttgtgg  |
| 22021 | gatcatgtta  | gcaagctcca  | gtgcttcaac  | taaatcacta  | ttccacatca  | tactgcgatc  |
| 22081 | ctcaagttaa  | atatcaggca  | tcattttttg  | tacctttttt  | atagcttttt  | tgcttcttc   |
| 22141 | taaaacttca  | gcaacacgga  | acactgatgc  | gtactttttg  | atagtgttct  | gcatttcgct  |
| 22201 | gcgtattttt  | gctactttta  | gccacccgga  | ggcaaatcgc  | atttttattaa | atctatctac  |
| 22261 | tatccagtct  | gtgcagtcgt  | aatgcaattt  | tttatgtggg  | gtaccggatt  | ttagtttctc  |
| 22321 | tcttgctctg  | agcgctgcag  | ctctgccaaa  | aaccacaaga  | tcaagaagcg  | agttagaacc  |
| 22381 | aagtcgattt  | gcaccgtgca  | cagagacaca  | cgcagcttct  | ccaattgcaa  | atagtcctac  |
| 22441 | taccacttct  | tccttacctt  | gcttcagcgt  | gatcacttct  | ccataataat  | tagttggaat  |
| 22501 | gccacccatg  | ttatagttaa  | cagtcggaat  | gaccggtatt  | ggatcttttag | tgacatcaac  |
| 22561 | tccagcaaaa  | gttcttgctg  | tttcgctaatt | gcccggcaat  | ctgagtttta  | ttacttcggy  |
| 22621 | atcaagatgt  | gctatagtta  | aatacatgta  | atcttttttc  | ggtccaactc  | cccttccctc  |
| 22681 | tctaattctca | attgttattg  | cgcgacttac  | cacatcacga  | gaagctaaat  | cttttgcttt  |
| 22741 | tgggtgcgtaa | cgttccataa  | acttttcgcc  | ctgagaatta  | acgaggtacc  | ccccttcacc  |
| 22801 | acggcatcct  | tctgtcatca  | ggcacccctga | gccatatatt  | cctgttggat  | gaaattgtac  |
| 22861 | aaattccata  | tcttcaagtg  | gtaatccagc  | ccttactacc  | atgccattac  | catcacctgt  |
| 22921 | gcaggtatgc  | gcacttggtg  | cagagaaata  | aacacgtcca  | tatccacctg  | ttgctaacac  |
| 22981 | cactctatgc  | gcacgaaatc  | tatgtaatgt  | gccgtcgcat  | agcgaccaag  | caagaactcc  |
| 23041 | gcagcatggt  | tcgctatcca  | taattaaatc  | aatcacaaaag | tattcaacaa  | aaaattcagc  |
| 23101 | gttgaattta  | agacactgct  | gatatagagt  | gtgaaggatt  | gcgtgcccag  | tcttatctgc  |
| 23161 | tgccgcacaa  | gtgcgctgcg  | ctgatttttc  | tttaccaaaag | tgagttgtca  | ttccacccaa  |
| 23221 | ggaacgctgg  | tatattttgc  | catcttctgt  | acgagaaaaa  | ggtacgcca   | aattttcaag  |
| 23281 | ttcaataaca  | gcttttagcag | cgttttttaca | catatatctt  | attgcatctt  | gatcaccaag  |

|       |            |             |             |             |             |             |
|-------|------------|-------------|-------------|-------------|-------------|-------------|
| 23341 | ccagtctgaa | cctttttattg | tgtcatatgc  | atgccagcgc  | caatcgtctt  | caccgatatt  |
| 23401 | acctaaagct | gcactaattc  | cgccttgtgc  | tgcaactgta  | tgacttcgtg  | tagggaaaat  |
| 23461 | tttagaaatg | caggcaactg  | aaaaattagt  | tgcaagccatc | ccaagcgttg  | ctctgagccc  |
| 23521 | tgctccacct | gcacctacta  | ctaccacgtc  | atactcatgt  | tctatgatct  | catacgtga   |
| 23581 | cttatccata | tttacttatt  | ttatcattac  | aggcttatga  | tatcacagaa  | gtagaaaaaa  |
| 23641 | tctatacaag | ttttctatag  | ctataccacc  | gcgaaccgtc  | ataccgccgc  | ggatatctct  |
| 23701 | aacatagatc | ccttacttaa  | ccgtcatacc  | ttaacataga  | tcccgcctaac | aagcagcggg  |
| 23761 | atgacggtta | tcaggctagc  | tgtcatccca  | gtttggaatc  | caggaaaaag  | aatggtgtca  |
| 23821 | tcccattgcc | cagacactgg  | gatccaggaa  | agtttgcttg  | taaacaagca  | aactagcata  |
| 23881 | gaaagtgggt | acaacgtttt  | cgatgagatt  | atatggaaaa  | ctggattcca  | gtgtcaagca  |
| 23941 | ctggaatgac | atcacagggg  | caatggaatg  | acacctctct  | tgggctcttt  | tagctataaa  |
| 24001 | cattaagaaa | tttaccaaac  | gaaaaaaaaa  | gcaaaaagaag | ccccgtgggt  | attatccgct  |
| 24061 | ttaaaatatt | ggcgtttttt  | atgtttttaa  | cgcttgacaa  | gcgaaattca  | gctgctttta  |
| 24121 | attgcaacta | acctacgctg  | caaagtgtta  | agaaatttac  | caagcagaaa  | aaaagacaaa  |
| 24181 | gaatccccga | gttagctagt  | cttttactat  | ctttgtcgag  | tattggcatt  | ttttgatgtc  |
| 24241 | ttgtaacgct | ttgtaagcgc  | gttcagctta  | tttagataaa  | aatctagatg  | tagatgaagt  |
| 24301 | tttgtaaaga | catacagtat  | ctatatactg  | caaaaaatta  | aacataagac  | gccgatacat  |
| 24361 | taagtaatcc | ttacctttta  | atctgcagat  | tggcgaaagc  | aaatacaata  | gcttcactgt  |
| 24421 | catgataaag | gggctggcga  | aggatgtcaa  | gtaattttct  | tatttcattt  | aaattgcttg  |
| 24481 | taaccttctt | atacactcat  | ctttaccaag  | aatcaccatg  | atatcaatga  | ttccagggtgc |
| 24541 | atccattact | ccagttatag  | gggcgcgtaa  | tgagtgggat  | acatcgctta  | ttttcataatc |
| 24601 | gtgcaatttt | gcacattcct  | tgatctgaga  | agataaaaaa  | cccttattcc  | aattttcatc  |
| 24661 | accgatcttt | gacagaaatg  | acgcgagtaa  | cttaattata  | ttgagggttag | atltgacaat  |
| 24721 | ttgctcagcc | tcttcactta  | aatcaagtgg  | cggatcttga  | atataaaaatt | ttgctaaaatc |
| 24781 | caataattcg | gtcaggtagt  | ttgctctttt  | ttttagctct  | gtcagtcctt  | gcagtaaata  |
| 24841 | gccctttttt | ttgtcagtta  | gagtattttc  | tctaagcatt  | agagtcagaa  | tatcttcatt  |
| 24901 | gctcatatta | ctaatatagt  | ggttattcaa  | atgctccagt  | tttttgaaat  | cgagccgtgc  |
| 24961 | aggtgaacga | ccaatacttt  | ctaaattaaa  | ccactctatt  | gcttgctcat  | cgctaataat  |
| 25021 | ctcatcgtta | ccgtgactcc  | agccaagtct  | cagcaagtaa  | ttacgcacgc  | cttttggcaa  |
| 25081 | tattcccatc | ttttcataat  | cgcaaacgct  | tgtggcacca  | tgcttttttg  | atagcttatt  |
| 25141 | cccatcttcc | ccatggataa  | gcggcacatg  | tgcaaagcgt  | ggaatgtcaa  | aatcaagagc  |
| 25201 | ctggtatatt | agcagatggt  | taaagggtatt | agtgagatgg  | tcagaaccgc  | gtattatatac |
| 25261 | agttattcca | gcatcatgat  | cgtcaattac  | gacagcaaaa  | atataatggtg | gagtgttgctc |
| 25321 | agagcgtaag | atcactatat  | catcaagctg  | gttgctatatt | actttgattt  | ggccgtatat  |
| 25381 | tttatcatca | ataacgatct  | cttgcgaaatc | tggcacttta  | aagcggacaa  | ctgacctcac  |
| 25441 | acccgatgtc | attccagcgc  | gtgaccacat  | atttttccag  | tgctcggtac  | ttggatgaca  |
| 25501 | agaaggaggt | tttgtagtac  | atlttatgctt | gtatatcttg  | ctctcttctc  | ttgcttttat  |
| 25561 | tttcttttct | gcaacttcat  | cctcagggca  | ataacagtga  | tacgccctac  | ccttctcaac  |
| 25621 | taaaagggtt | gctacttctt  | tatgccgctc  | tattcttttt  | gactgatata  | ctattttcccc |
| 25681 | atcatagctc | acaccgagcc  | atcttagccc  | ttctataaatt | acatcaattg  | cttctttcgt  |
| 25741 | tgaacgtttt | ctgtcgggtg  | cttcaattct  | cagcaaaaaa  | ctgccaccat  | gatgctttgc  |
| 25801 | atagagccaa | ttgaataaaag | cagtacgagc  | tcctccaatg  | tgcaaaaaatc | ctggttggtga |
| 25861 | tggagcaaat | ctagtgacta  | cgtctggcat  | atlttgctat  | tacagtaata  | taaatgatga  |
| 25921 | tagctaaaaa | ttatgtttgt  | aacaatttag  | aattttatttg | ttctgagaga  | taaaattttac |
| 25981 | ttgtttttca | taaattgtgt  | tgtataattt  | agtactgggt  | gaatatagcg  | aggtgagtta  |
| 26041 | tggatggact | tgtagatata  | gcaaaattgc  | tttcagataa  | tgaagctaat  | atcaattggc  |
| 26101 | gttacaccgg | cccttttgat  | aaaacaaaaa  | aaagagtata  | ggcagataat  | ctcctgcatt  |
| 26161 | tagctgcaag | aatacaaaaac | aaaggtaaat  | ttgtagacat  | ttgtaagaag  | aacattgctt  |
| 26221 | ctgtaactgc | gcataatgaa  | tatggagata  | atccatttca  | tgaagcagca  | agaagtggaa  |
| 26281 | ttttgctgcc | tgcagtacaa  | gagattgtga  | atgacttaga  | gacggaagct  | gataacaaaa  |
| 26341 | ttacgaaagc | agaagaagct  | ggagatcgga  | agaagtaag   | cagattgaaa  | gaggaactca  |
| 26401 | aatgtaataa | aaaatatatt  | aaagatgcgc  | tctgcagtaa  | agactatgct  | tttaataaga  |
| 26461 | agagggaaac | tcctctttat  | tacttaaatg  | ctgcacaaca  | gaaagaaatt  | aagcaaatcg  |
| 26521 | caggcataaa | agacagcttt  | atatgtaacc  | agaagtttca  | cctgtgctta  | tatataatag  |
| 26581 | gagcgatagc | atgtatcgct  | gctttatggt  | tgtctttata  | ctttttattt  | ttagtttctc  |
| 26641 | aatcttttgc | actaagctcg  | atggttgcaa  | tagcttctgg  | cggagtcaca  | tacctgtcag  |
| 26701 | ttaaagcatg | tagcgagata  | catgccttgc  | ataacgaaag  | cacttttagtg | gaaaaatgcta |
| 26761 | atgtacaact | tgcaggagaa  | agtttgggtg  | tttgatgaag  | ctagaaatta  | cttgcaggca  |
| 26821 | atgatataga | aattttacttt | cttaacttca  | gaaagtatac  | tcatacgatg  | atagaaaaga  |
| 26881 | agtacagtaa | gatttttaata | gcaaatagag  | gagagattgc  | ctgcaggatt  | atcagaactg  |

|       |             |             |             |             |             |             |
|-------|-------------|-------------|-------------|-------------|-------------|-------------|
| 26941 | cccataagat  | gggtatatct  | tgtgtgtgca  | tatactcgga  | tgcagatgta  | aattctgtgc  |
| 27001 | atgtaagaca  | agcagatgag  | tcaagatata  | tcggcccttc  | gccatcttgc  | ctcagttatt  |
| 27061 | taaacattga  | aaaaatatgt  | gaagtagcag  | ttgaaacagg  | tgcgcaggca  | gttcattcctg |
| 27121 | gctatggttt  | tttagcagaa  | aatccagatt  | ttccacgtgc  | tttgcaaaaa  | cacaatatag  |
| 27181 | acttcatcgg  | ccccagtgca  | gaaacaatag  | aagttacagc  | caacaaaaata | acagcaaaag  |
| 27241 | aagcggcaaa  | aaaagctgga  | gtgaatgtag  | tgccaggata  | tatgggtaag  | attagcgacg  |
| 27301 | ctgcccacgc  | agctcaagtt  | gctgaagaaa  | ttggctttcc  | ggttatgctt  | aaagctgcat  |
| 27361 | caggcgggtg  | tggcaaagga  | atgcgcaattg | taaactccaa  | aaaagaaatt  | gaactagcat  |
| 27421 | ttacatcagc  | cacaaatgaa  | gcagagaaaa  | gttttaagga  | tggcagtatc  | tttatagaga  |
| 27481 | aatatataga  | gttgccaaga  | catattgaaa  | tacaaatcat  | agcagataaa  | tatggcaata  |
| 27541 | tagtttgtct  | tggagaaaaga | gaatgctcga  | tacaaaggaa  | taatcagaaa  | ataatagaag  |
| 27601 | aaacgcccaag | tccattcatt  | agtgaagaag  | taagacaaaa  | aatgtatggt  | caatgtgttt  |
| 27661 | ctctggcaaa  | gcaagttggc  | tatTTTTcag  | caggcactgt  | tgagtttgtt  | gtagataaag  |
| 27721 | acccaaactt  | ctatTTTTctt | gaggtaaata  | cgagattgca  | agttgagcat  | ccagtaacag  |
| 27781 | aattttataac | tggaaatagac | atagtagaag  | aaatgattag  | aacttcctgt  | ggagagaaat  |
| 27841 | tgagattcaa  | tcaggatgat  | attaaactta  | ctggttctgc  | aatagaaagt  | agaatttgcg  |
| 27901 | ctgaagaccc  | atcgaagaaa  | TTTTTccctt  | ccagcgggaag | aataaaatat  | tacgataaac  |
| 27961 | cgggtgaaaa  | tgattatgta  | agaatagatg  | atggagttgc  | tgcaggttca  | gaaattagca  |
| 28021 | tgttctatga  | ttcgatgatt  | gccaaagtga  | taacatatgg  | aaaagataga  | gtagaagcga  |
| 28081 | tcagcagaat  | gcaaaaagca  | ttgtctgaat  | gctatataga  | aggagtaaca  | aataatatag  |
| 28141 | aattttctaga | atccatcttc  | catcacccaa  | atTTTtatcgc | agcaaagctc  | catacgagat  |
| 28201 | tcattccaga  | tcattaccct  | agtgggtttc  | acggcgattt  | tgttacagag  | gagtatatta  |
| 28261 | aaatattttat | tttctactgcg | ttatatgttc  | atTTTggaaaa | tgaagaaagg  | taccatcata  |
| 28321 | aagcagtgaa  | tgaaacatct  | cagggtgtcat | tccagtgcgt  | gacactggaa  | tctagtaaaa  |
| 28381 | aagaagggggc | accagtatca  | gctactcgga  | tggcagggtga | ccgtgcaaga  | gatttattca  |
| 28441 | tagtgaatat  | aaatgacaat  | gagtactccg  | taaatgcaaa  | ataccaagat  | aatatattaa  |
| 28501 | taacggtata  | taatcacaat  | aaatactccg  | ttataggcaa  | gtggaaatca  | agttatagat  |
| 28561 | tgctatatata | cacaattaat  | gacgatacca  | atatagcact  | taaaatagaa  | agacaaggca  |
| 28621 | gcaagtactt  | cataagacat  | gcaggcatga  | aagctgagtg  | ttgtatatatt | aagcctcatg  |
| 28681 | tagctgaatt  | aagtaggtta  | atgctaaata  | atgaaacaga  | agggattttca | gcagatgctg  |
| 28741 | taaaatcccc  | aatatctggc  | ttattagttta | agttgcacgt  | aaatgtagga  | gatcagggtg  |
| 28801 | aaataggaca  | acctttatTTT | gtgggtggagg | caatgaaaat  | ggaaaatatc  | atatgtgctg  |
| 28861 | aagcagcaat  | ggtgataaaa  | aatattcccg  | ttcaagaagg  | aaaaaatgtg  | cagattgggtg |
| 28921 | atgtagtctg  | ctttctttaa  | taacacaaga  | agtacaaaact | tgacccaaac  | aagataaatg  |
| 28981 | aaaacacttg  | atgagctatg  | gcaatggcta  | ttggtatgtg  | taacaaaaga  | gtaaccactc  |
| 29041 | ctaaaatttat | ctgaatgatg  | atggagagca  | gcataatata  | taccggTTTT  | acgctagcat  |
| 29101 | TTTTTactgt  | gagtattact  | accaaagtta  | gtattagcaa  | tgccagtgct  | cgatgtataa  |
| 29161 | attgcactgt  | cgctctgttc  | tcaaagatat  | tcagccatat  | aggctgtaag  | aaaaataaat  |
| 29221 | cttctggaac  | gacttgtccg  | tccattagtg  | gaaagggtatt | gtaaatcaaa  | ccagcattta  |
| 29281 | atcccgcac   | aaatgcgccg  | aaaattatTTT | gtattacaat  | taggacccaaa | atcatccttg  |
| 29341 | cgtagtatata | agtgttacca  | ctaaccttaa  | gttttgtttg  | ttgtggcctt  | atctgataat  |
| 29401 | caaaaaattg  | atatgacaat  | aatgcaaaga  | taattaatgc  | taataataag  | tgaagtgcaa  |
| 29461 | gcctatagt   | gctaacatga  | ggttcagttta | ctaaaccact  | tttaaccata  | taccaaccag  |
| 29521 | caaaagcttg  | taaagctcca  | aataataatg  | ccacaaaatag | ctttattact  | acctTTTTtag |
| 29581 | atattttttct | tcttaatgta  | aaatatataa  | atggcaggac  | aaaaactaaa  | cctgttagtc  |
| 29641 | ttgccaccaa  | tctgtgtaca  | tattctatta  | agtatatagc  | gcgaaaactcc | tccatactaa  |
| 29701 | taccatagtt  | aagtgtcttta | tattcagggtg | tagcttcgta  | TTTTTaatttt | tcttgtagcc  |
| 29761 | agtcttgttt  | actcagtggt  | ggtaatgttc  | cagtaatagg  | tttccactcc  | gtgattgaca  |
| 29821 | atcccgcctc  | tgtaagtctg  | gtaaatccac  | caattccctac | cataagaatt  | accataatac  |
| 29881 | agcagagaaa  | aagccaaatg  | gctacagggt  | ttgcttccat  | aaacctggtt  | tagttttgtt  |
| 29941 | ccatcgctca  | gggtaaaagaa | taaactccca  | caaggcaaga  | aaagctgcaa  | cactatgtag  |
| 30001 | cagactatag  | accggaaaaaa | atatcgatac  | tatataaaaa  | taaaaaggca  | tcttttgcctg |
| 30061 | tttgacagct  | attaccaaaaa | gaatcagggt  | agtaacgtat  | accactacaa  | agtagtacaa  |
| 30121 | aaataattca  | TTTTaaaactt | tagttaatat  | caatgaaagc  | agtaaaaaatg | gagtagtaaa  |
| 30181 | aaatataaaa  | gctgcagagc  | caacaaaaag  | attcaatagc  | aaaattccct  | taaatccagt  |
| 30241 | gtgtttataa  | agtgactttaa | tatttttttaa | atgaacaata  | taagtttgca  | tatagccttt  |
| 30301 | gatccagcgc  | gctcttttgct | taatccaagc  | aaatacagca  | attggtgact  | cttccaatgt  |
| 30361 | ttctgagtca  | atcatcctgg  | TTTTtatatcc | catttgcgca  | agtctcaaac  | cgaggtcagc  |
| 30421 | atcttcggta  | acactataag  | catcccagaa  | aaacactttt  | tttagaattt  | ttactgaaaa  |
| 30481 | atgattactg  | ctaccaccca  | aaggcatcgg  | catgttcatt  | TTTTggaatc  | caggcaataa  |

|       |             |             |             |             |            |             |
|-------|-------------|-------------|-------------|-------------|------------|-------------|
| 30541 | gtattgaaac  | cagttcatat  | actccagaga  | aaaggatfff  | gtgagaaaat | tataatcaca  |
| 30601 | attatagtaa  | tttaatttcg  | cctgtacaca  | ggcaagctta  | tcgtcgccct | tattaaattc  |
| 30661 | aatcagtgct  | ttttttaact  | gcaatgggtc  | tggtttatcg  | tccgcatcat | atattactgc  |
| 30721 | atactttcct  | ctagcaaagc  | tcatagcata  | attgcatgac  | ttggcttttg | ttctaggcaa  |
| 30781 | agaatgaggc  | acttttatta  | cttcaaaata  | ctgtggtaaa  | gtgtactttt | ctatagctgc  |
| 30841 | tagcgtttcc  | tggtcatcac  | tttctaccag  | aagctttaca  | tctaatttcg | actttggata  |
| 30901 | atccaaactt  | ttaacgcttt  | caattaattg  | ccctattact  | gcacttttct | caaatacagg  |
| 30961 | cagtaaaata  | gtatatatag  | gttcattcaa  | cttactataa  | tccacttttt | gattagagat  |
| 31021 | ttcacataag  | ctaaaaactg  | tagctataaa  | cttgaataaa  | taactagaac | atccgattat  |
| 31081 | aaatatcaac  | atcaaagcaa  | aatatgtaca  | tttctctgtg  | agtgttaaaa | ttgaagttac  |
| 31141 | aataaagaaa  | gaagcaaaaa  | atattgagct  | tagttttaatg | cttttggctg | aaaaattagg  |
| 31201 | attcttgtaa  | tataagtagt  | tgcttgcaaa  | ttctgaaata  | ccaaagtgcg | agttaagaag  |
| 31261 | atttaaaatc  | tgttcgctat  | ccactttttat | taatacatag  | tcaataccgt | aatgagtttc  |
| 31321 | gacccaacgg  | gtgatatcta  | gacttgtgtc  | ttcaaccata  | aaaaaagtag | tatcatttaa  |
| 31381 | tttttgccaa  | ggaattatat  | taaattttata | gtaaaaaagt  | ttctcttgct | ctttgcataa  |
| 31441 | actagaatca  | aacttaattt  | tttctacatt  | atcagcttga  | agtataggca | ttaaacctaa  |
| 31501 | tgcaatffff  | tatttaagtc  | acgtgaaaat  | gaagatatga  | cctcgctact | acgcttatca  |
| 31561 | tctttacgtt  | catgcattat  | tttttttaca  | gcatacagcag | ctatactcgc | tgtgttagcc  |
| 31621 | tgtaaattctc | caagagcttt  | ttcaacttgg  | tcagtgactt  | tcttcaagtt | agaatgggca  |
| 31681 | ttgtcatcta  | atgtctgatc  | tagctgctgt  | ctattgtgct  | taatgatact | attagcttta  |
| 31741 | tcaagtgcct  | cattcatcat  | ttcattaact  | tctgcatacta | atfttttgta | tttttcagaa  |
| 31801 | gattttttgt  | aatactccaa  | catatctttc  | ctgaatffff  | cagtttcttc | acttgaaaat  |
| 31861 | ttgcttttgt  | tacgcttatt  | gttaagcgca  | ttttttatca  | ctttcttcag | caatttatac  |
| 31921 | gaaaggacaa  | aaattaccaa  | aaaggcaaga  | ccgataatca  | gtgatgtaga | cataaaaacc  |
| 31981 | cctaaaattc  | tttggaacac  | aaatcagcaa  | caaactcctc  | ttcaatttca | gaattgggtca |
| 32041 | atntagtata  | ataaattaaa  | gcaatactag  | tagccatttg  | ttttaactga | tcagtatatt  |
| 32101 | cagatttaaa  | ttctgccact  | ttttcttcaa  | taagcttgct  | cttttttttg | tcttcctctt  |
| 32161 | ctaatatatt  | ctttacatta  | gctctcattt  | cttctgcctg  | agcaagtgca | tcatactatga |
| 32221 | ttttttttgc  | ctgtattcta  | gcttgggtta  | aagctgcgtt  | atacttggca | acctgatctt  |
| 32281 | ccgtgagtct  | taaaagatga  | acagaactat  | taaaagaatc  | caatacttct | ttacttctag  |
| 32341 | tgcttattat  | ttcatctaac  | tttggaacaa  | ataaacact   | tactacgaaa | aaaagtgaag  |
| 32401 | agaaaaaaat  | taaaaaccaa  | aaaacttgag  | aaaagaaggt  | tgaaacatca | agctgtggca  |
| 32461 | tctgttaagc  | agcaaatatt  | aataacattg  | caagtacaaa  | cgcaagcaat | cccatgattt  |
| 32521 | caaccatggc  | agcaccaata  | taaacgtaac  | ttttcatttt  | accttctgat | tcagggttcc  |
| 32581 | tcgcaatccc  | atttaacata  | gcagagaaga  | tattagctat  | acctaaacca | gcgccgagca  |
| 32641 | ttccaaacac  | agctaaacca  | attgctataa  | atftttaaagc | tactaaatcc | atatattacc  |
| 32701 | tttaattatt  | tctttataat  | ataattgtaa  | aatattctac  | aaggaagtca | attactttac  |
| 32761 | tgcatctgac  | aaatatacac  | atgttaatat  | agtaaatata  | taagcttgta | aaattgcaac  |
| 32821 | aaatacttca  | aatcctatca  | atgcaattat  | gaacaaaaaac | ggcgaggag  | tgaaaaatat  |
| 32881 | gttcatatft  | acaataaac   | ctgctatcac  | tttgatgatt  | gtatgaccag | caatcatatt  |
| 32941 | tgctgcaagc  | cttattgata  | ggctaactcg  | tcttactaaa  | taagcaaaca | acttaataat  |
| 33001 | aattattata  | ggtgcaagcc  | acgaaggagt  | tcctttttggt | agcaatatgc | gtaaaaattc  |
| 33061 | tactcccctt  | tctttaaatc  | caacaatcgt  | tatataaata  | aaaaccacca | tcgataaagc  |
| 33121 | gaaggtgact  | atcacatgac  | ttgtgaccgt  | gaaactataa  | ggaagaacac | caactaaatt  |
| 33181 | acacgataaa  | atgaaaataa  | atactgtgaa  | tatcaatgga  | atgtgctgca | agcctttgct  |
| 33241 | tccagtgtta  | ttttctatta  | ttgaaataac  | aaaatcatat  | acataactca | ctgcagcttg  |
| 33301 | caaatatcct  | ggtattactg  | accccttctt  | tattccaaaa  | agcaaaaaga | gtatcatcaa  |
| 33361 | tatcaccgaa  | atcatcgtga  | aaaaagatga  | attggtaaaag | cttacgtcat | acccaaataa  |
| 33421 | cctaggtaac  | tctattattg  | tatatacctt  | aaactgttcc  | agtggattta | gtgccatttt  |
| 33481 | aatctgaatt  | ataaacagta  | aataaagtat  | gaattttata  | ggacaaagtc | aagaatttaag |
| 33541 | ataaggctct  | gtattattat  | aacattaaca  | tattaacaaa  | atatgtaatt | agaatgttaa  |
| 33601 | ttacagtcag  | ctctgtatft  | taaaattttac | taatcttggt  | aaattattca | atatcttgac  |
| 33661 | ttaatatctt  | atftttgatta | taatttaatt  | tttagtgagg  | tatataatga | acgaaataga  |
| 33721 | ttttattaac  | attaatcatc  | ttttaaattt  | ggagcaggaa  | tttggagcag | gaatttggtta |
| 33781 | acggatacat  | cgaatttgta  | gattgtttcc  | ttgacgaaga  | tactcgcgat | tattacatag  |
| 33841 | gactcaacgt  | actagatgaa  | agccataatg  | caataaaaaca | cttcgttttt | gatggtaaca  |
| 33901 | ttgatgagga  | tgccctgggat | tatggaagtc  | ttaaattctt  | tccggagata | gatttaaaag  |
| 33961 | gtgacataga  | aaaaattctt  | tctcttcgca  | agaagatata  | aagttacaaa | agcttctaca  |
| 34021 | tcattgttta  | tgatgtagaa  | gtattccact  | acaacaagct  | ttaaaagcac | tacattttat  |
| 34081 | attacaataa  | cttttttatt  | tcttgttaga  | tcgatgaaat  | tcacgttatc | ttggttactg  |

|       |             |             |             |             |             |             |
|-------|-------------|-------------|-------------|-------------|-------------|-------------|
| 34141 | gagtattttag | aaaccaatgc  | tagtttagaa  | gaaattaccg  | ataaattaac  | tcacataggg  |
| 34201 | ttagaagtag  | aagatgtgat  | cgataattcc  | agattgactg  | ggtttatcgt  | tgcagaggta  |
| 34261 | ttagaagtcg  | tacctcatcc  | aatgctgat   | aaattaaat   | tatgtaaagt  | aatgatgga   |
| 34321 | agtaaaattc  | tacaaatagt  | ctgtggagca  | aacaatgtta  | gagaaggtat  | gaaaactgta  |
| 34381 | cttgcattct  | ttggtagcac  | gttgccagaa  | agtgatctca  | caattaagtc  | cacaaaaata  |
| 34441 | cgaggaatgc  | taagtgaagg  | gatgctctgc  | tctgcttctg  | aacttgcgct  | ggttcaagag  |
| 34501 | aaaagtgaag  | gaataatcga  | gctttccgat  | gattataaag  | taggggataa  | atttttcaat  |
| 34561 | tgtgaccctg  | taattgatat  | aaatgttact  | ccaaatcgtg  | gagattgctt  | aggcatttat  |
| 34621 | ggaatagctc  | gcgaccttgc  | tgcaactgga  | attgggacat  | taaagacttt  | aagcattcca  |
| 34681 | caacttacca  | gctccataaa  | ttcaccaatc  | gatgttgaag  | ttactgacgg  | ggaaagtttt  |
| 34741 | attagtggaa  | tatacatcgc  | caatgtaaaa  | aatcaagaaa  | gccccaaatg  | gttaaaagat  |
| 34801 | aggctggaat  | cgataggaat  | gcgctccatt  | tctgcaatag  | ttgatatcac  | gaactatatt  |
| 34861 | atgatatctt  | tcagccgccc  | aatgcacgcg  | tatgatgcaa  | aaaaaataga  | aggagagctc  |
| 34921 | acagtacgca  | aagcaaacga  | cggagaaaaa  | tttgctgggt  | tgaacggtaa  | agaatactta  |
| 34981 | ttaaacaaag  | acataagcgt  | tattgcaggt  | gataaaaaata | ttcatggaat  | tgctggaatt  |
| 35041 | ataggtggta  | agtgcagtga  | atgtactctt  | gaaactactg  | atatcttttt  | agagtctgct  |
| 35101 | tggttcgata  | ccatctctat  | tactaaatct  | tcaaggcagc  | tcggcatctc  | cacagacgct  |
| 35161 | agttacagat  | ttgcacgttc  | agttgatcct  | ggatttactt  | ttgatggact  | caaccttgca  |
| 35221 | gctaaaatga  | ttctggactt  | atgtgggtgga | gaaacctcaa  | gcgtagtgct  | tgctggcagt  |
| 35281 | ttagatagtg  | ctgacaccaa  | ggtgagcttt  | gattatcagg  | atgtgaacaa  | gtttggaagt  |
| 35341 | gtgtctgtat  | cgcctgatga  | ggtgcttgat  | atcttaacga  | aactagggtt  | tagtattgat  |
| 35401 | aaaaaaaccg  | aaggcaattg  | gaatgtacaa  | gtaccaagct  | ggagaccgga  | cgtgacaata  |
| 35461 | ccggctgacc  | taatcgaaga  | agtaacaagg  | atatacggct  | atgacaaaat  | aaaagaagaa  |
| 35521 | ccactaccaa  | ataatgttga  | agaagtagat  | agtacatacg  | acaatttgcg  | tattttgatg  |
| 35581 | acaaacagag  | ggtttcatga  | agtgctaacc  | tggtcgttta  | tgagtgaatc  | aacagctgaa  |
| 35641 | aaatttggtt  | actcgaataa  | gttattttatc | atcgataatc  | cgtttaacaa  | tagctttaat  |
| 35701 | ataatgagac  | caagtattat  | gccaaattta  | ttgcaagtta  | ctgctgataa  | tattgcccat  |
| 35761 | ggaatatctg  | atcttgcaat  | cttcgaaatc  | gggccgattt  | acgatgggtga | agctcagctc  |
| 35821 | aagtatgttt  | taagtggaat  | taggtcagga  | aataatttac  | cgcgaaacca  | ttataatact  |
| 35881 | gataggaaaag | tagatgtttt  | tgacgcaaag  | gctgattgca  | tagcagcttt  | ggagtttttt  |
| 35941 | aacgttaatt  | gtgataattt  | aacgatagag  | aaagcagaaa  | aagaacatta  | ccaccaggga  |
| 36001 | aagtcaggca  | ctctctcttt  | taagaataaa  | gtagcagggt  | attttggaga  | gttgcatcct  |
| 36061 | aatatatttag | atcttttttga | tatcaagcaa  | aaagttgtag  | gttttgagggt | aatactagaa  |
| 36121 | aatattgaaa  | atttacctgt  | aagtagaaaag | aaatttatcg  | attataaata  | ccaaagtgtg  |
| 36181 | aaacgtgatt  | ttgcattttat | agtaaataag  | gatgtggaag  | taggtaacat  | aatcaatgtg  |
| 36241 | ataaaaaaaaa | gctcagagct  | catcacagaa  | gttttgatat  | tcgatgtata  | ccatggaaat  |
| 36301 | aatatagaac  | cgaataagat  | gtctatagcg  | ttgtcagtta  | ctttttgctc  | tccaatccac  |
| 36361 | actttaactg  | aaaaagagat  | ccaaaaagaa  | tcaagtgcta  | tagttaattt  | agtatgtgaa  |
| 36421 | aataccggag  | gaactttgag  | aacttatcgt  | tgagtcacaa  | tcatagtttc  | ctgccgttgc  |
| 36481 | tgtgtcacac  | ttacttcatc  | caattttattt | ccaatattga  | attcaatatc  | cttgaaaaat  |
| 36541 | ctatcccaca  | ttccatgcaa  | atgctcttct  | attttaggcc  | acacatcatt  | tttaaatgtt  |
| 36601 | accccatcat  | cagaaaataa  | attacctaaa  | aaggctccaa  | taccttcata  | atttgactga  |
| 36661 | aaacattgaa  | gaaatgtctc  | tccttcttta  | taagtattat  | gtgccacatt  | taacgctttt  |
| 36721 | ctctctgtag  | tctctttata  | agcatttgat  | gctccaatct  | ttattgcacc  | aaacataact  |
| 36781 | ttactccagt  | tcttaacttt  | ctgtatacaa  | ccttcactat  | ttcctgggtat | attattttatt |
| 36841 | atatttttttg | tcaaattgtc  | tatcaaagga  | gacaataaat  | tttgactaaa  | atgtttgata  |
| 36901 | ttatctttttg | ttttaattac  | aggatatttg  | atgcgttttt  | ctgctaaaca  | gtactccagt  |
| 36961 | tctgctcttt  | ctaataactt  | cttgatttct  | ttttcatcaa  | aagtttcaag  | cttgaatacc  |
| 37021 | ttcagtaaat  | catcttctat  | tactgcaaat  | tttatttttt  | cacgagacgt  | tagttcttct  |
| 37081 | ttataatcat  | tttttgtttc  | ttcattttatc | aataattctt  | ttttgcctaa  | ttctaactgt  |
| 37141 | tttaatgctt  | tcagaatttc  | ttcatttcctt | tttaagagca  | cttctattga  | tcttgtaccc  |
| 37201 | ggatgccctt  | tttccctggt  | attttgttca  | gcttgtaaac  | gcttatttttg | atctttgagt  |
| 37261 | gtttgttcta  | atgtagattt  | ttctaaatgt  | ccttcatctt  | gcacgcgaaa  | agcttcaatt  |
| 37321 | atttctgcta  | gacctgattc  | accatatttt  | cttaatttct  | tgcataaacg  | taaaacaccc  |
| 37381 | tttttttggt  | ctcgaagtaa  | cctttgcact  | ttataatttt  | ttattttctaa | atacatcttt  |
| 37441 | tctataaagt  | catttatttt  | agctgaagct  | tccttatccg  | atggaacctt  | tacttttttt  |
| 37501 | tctaaatctt  | caagctgctt  | ccttaggctt  | tgcttctcct  | tatccgggtat | atctgattga  |
| 37561 | cttaacttac  | cttgaacttt  | tttcattact  | gatttttatca | gcctgcgctc  | aatctcttga  |
| 37621 | tcatgatatt  | cgaattttaaa | aaggctcttct | aacccctttt  | ttaagggtgtc | atttgttaag  |
| 37681 | ctactgtttt  | catgtatttc  | ttttaatttc  | ttatatatat  | tgttacacct  | tgtttgacct  |

|       |             |             |             |             |             |             |
|-------|-------------|-------------|-------------|-------------|-------------|-------------|
| 37741 | attcctatta  | aacgttcaat  | ttcttctttc  | gcattaccta  | aggctttctc  | tgttgcttgg  |
| 37801 | agatgcttat  | ttttataaat  | atcaattact  | gtccttttaa  | ctatttcgcc  | ttcctttata  |
| 37861 | agctttttcc  | attccgcctc  | atgtacagaa  | aattcatcat  | cttttgagtc  | ttctacttcc  |
| 37921 | attcctgcgt  | ttttcaaatc  | ttctattata  | atctcttttc  | tacttggtaa  | ttccttacct  |
| 37981 | tggctctcta  | attcctgtct  | cactaaagaa  | ttttttatct  | catcttccag  | cgaaaaatct  |
| 38041 | tctccccgtc  | tatctcgtct  | aaacttaatt  | gcttgataaa  | aggcaacttg  | ataggcggtg  |
| 38101 | tatattaagt  | gagttgtcaa  | cttaaaatct  | atgctactta  | ccacttttaa  | cctgaattcg  |
| 38161 | tccaacaatt  | ccttcaattt  | atcatatgta  | atctctttct  | tttctagtgt  | tatcagttct  |
| 38221 | tccatagtct  | tcgcaaattc  | ttgaatagaa  | gttgcaagca  | cattcttgat  | ctcattacgt  |
| 38281 | aaaggcttaa  | gaccattttt  | taagtggata  | ttagctgata  | atttcagtat  | ggtattatgt  |
| 38341 | tctgaatcac  | gtgcaacatt  | aaaccaacta  | ccatctttat  | cttcgtataa  | atctctaact  |
| 38401 | agttgtttaa  | attgcggttg  | aaacttaact  | tccatattcc  | acttaatgtc  | tgcttcaata  |
| 38461 | gcctctatct  | catgaaaaga  | cacctcaata  | ttttggtgtt  | cattttgaca  | taaccatta   |
| 38521 | cttattttta  | tagcagcaat  | caaaaaatga  | gataattttt  | tattttaaaag | ataaaaagta  |
| 38581 | gccaaagcga  | gtggtgcagg  | aataagtaat  | gctgcaagca  | cagcgatatt  | aacaagaatc  |
| 38641 | actattgcag  | caagaacacc  | atatgccaat  | ctttttgctg  | tacttttact  | tactttcactt |
| 38701 | tttttggttt  | attctcctct  | gaactgattt  | gtgtcttatc  | atttggtttt  | aatttattat  |
| 38761 | atacggctaa  | tcctaacgca  | gtgaaaacta  | tataaggaaa  | cattaaaact  | gatagagcta  |
| 38821 | aatttaatac  | tttcttctcc  | gggcaagctc  | gatttacctc  | tttaaataat  | ctacttgata  |
| 38881 | tattatacca  | agaagtaaaa  | aaatcagagt  | tataatcttt  | ataatgaaat  | atactgagtg  |
| 38941 | gaacgttaaa  | attagctaac  | ggctcttggt  | cttccacagc  | atcaaaaaat  | tcttcttcct  |
| 39001 | cctccaaagt  | agcaacagat  | tctactttac  | ctaaatcatc  | actattgtta  | ttcaaatcaa  |
| 39061 | caactttttc  | ataatcatct  | gcaacagcct  | tattcatatt  | ataaccttac  | ctcaagtaac  |
| 39121 | ctaagtatag  | cataaacaat  | gacaactttc  | aactactaat  | aatttaacct  | aataccaaca  |
| 39181 | cttaaactct  | gatattcctt  | agaatagaag  | ttagttccaa  | tttctgtatt  | aatgtccaaa  |
| 39241 | gataaggcaa  | gggtctgctc  | ttttatatat  | tcaaaccacg  | tatttattgc  | ttccttaatt  |
| 39301 | ttctcttctt  | ctgttttgat  | tattactctg  | attctatctg  | atatatgaaa  | atcagcttgt  |
| 39361 | tttctgggtt  | cttgaatgag  | cctcacgaca  | tctctcgcta  | acccttctag  | aattaattca  |
| 39421 | tcattttagt  | cagtattttag | aatgacaact  | cctttgttgt  | tatcaaacac  | agcagaatat  |
| 39481 | ccactatttg  | cttttaacaa  | tagttcatat  | tcgccttttt  | ctatgatgta  | attttctgac  |
| 39541 | tcattaccta  | aaaaaacttg  | ctcatttttc  | acttgcttcc  | attttccctc  | tttgacatat  |
| 39601 | tgaactagtt  | tcttaatttt  | atctggtatt  | ctctttccaa  | gcagcggaaa  | acttagcttt  |
| 39661 | aactctagtg  | atgcaatatc  | ttcaagtctg  | tttactaact  | ccagtttttt  | tacatttacc  |
| 39721 | tcacttttta  | tcactctctg  | atattcattc  | atgcttggtg  | tcattccagc  | acttttttct  |
| 39781 | ttctggatcc  | cagtgtcagc  | tactcggatg  | acaggagaga  | actctgggat  | gacagaaaac  |
| 39841 | ggctcacctt  | caagaaaact  | acaggaagac  | tgatgataaa  | tgatcatact  | gccaaagtggc |
| 39901 | tgtctgatac  | gtatgtttaa  | agtgtttcta  | atagagagtg  | cagagttgca  | tatctctctc  |
| 39961 | accaaatacca | tcttggaact  | gagctgacta  | tcaaacttct  | ctaattgttg  | aaaattagcc  |
| 40021 | aaatgaacag  | atgtttcttc  | atacttaagc  | ccttgccata  | tattctctgt  | tataagtggc  |
| 40081 | aacaaaggag  | ctgcagctct  | tagtatgtaa  | taaaaaacgg  | tatatagaac  | attataagca  |
| 40141 | tcagttttat  | cctgatccaa  | atcacttttc  | caaaaacgct  | cgcgactgcg  | acgaatatac  |
| 40201 | caattattta  | gcacttcaaa  | aaagttcatt  | aaaattttgc  | aagcctcttg  | ggagttatag  |
| 40261 | ttgttcatag  | aagcttggat  | accttctaca  | gcttcaaaac  | acttggaat   | catgtaacga  |
| 40321 | tcaatagtgc  | tttgataatc  | cttacaact   | tcagctttta  | tcccatctgc  | atttgcatac  |
| 40381 | atggtaaaaa  | agtgatagct  | attccaaata  | ggttttatta  | cgtttttcag  | aacatctcgt  |
| 40441 | attgagtttc  | cttctttatc  | gagtagcaaa  | ttaccaccac  | aaacaataga  | tccagaaagc  |
| 40501 | ataagaaaac  | gcagtgcata  | agaaccgtat  | ctatcaaaaa  | cctccatttg  | atctgcatag  |
| 40561 | ttattcaaac  | gttttgacaa  | tttttgccct  | tttacatcca  | aaacaacacc  | gtggcatatg  |
| 40621 | cagttcttaa  | atggttccct  | atcaaacaaa  | gcagtggaca  | atacaaagag  | cgtataaaaac |
| 40681 | caccccttgg  | tttgcgctat  | gtactcagtg  | ataaaaatccg | cagattcaaa  | ccactcctta  |
| 40741 | ttttcaaacg  | gatagtggat  | ttgcgcaaat  | ggcatcgagc  | cagattcaaa  | ccagcagtca  |
| 40801 | aacacgtcag  | gtacacggcg  | cataactgat  | tttcctgttg  | ggcatcagag  | atttggctct  |
| 40861 | gttaaagtat  | cgataaatgg  | tctgtgcaag  | tcgtctatct  | taacattaaa  | atctctctcc  |
| 40921 | agttcttcta  | ttgaaccata  | tacatctact  | cttggaatct  | tcgcacgcgc  | tgatttccat  |
| 40981 | acagggattg  | gctgtacccc  | agaatcgatt  | gcgtgaaatt  | gaccagtcgt  | gtgccccttc  |
| 41041 | aagccatttt  | ccaaattgac  | catctctaatt | gtggtttggt  | atccaattaa  | ctctcttatt  |
| 41101 | tagctctacc  | attctgcttt  | tgaattttgt  | aactgcaaca  | taccaagaag  | gcatagtgcg  |
| 41161 | atagatcaaa  | ggagtgtcag  | ttctccagca  | gtgtggataa  | ttgtgaatat  | attgctcagt  |
| 41221 | tttaaaccaa  | ttcccttgct  | cttttaattt  | ttttattact  | gtatcatttg  | tatcaaaaac  |
| 41281 | atgaaccctt  | gccaaatctg  | aaactttcag  | cagtaaat    | tccactgtta  | tcaattggac  |

|       |            |             |             |             |             |            |
|-------|------------|-------------|-------------|-------------|-------------|------------|
| 41341 | aaataactgg | aatatcatgg  | ctttggcaaa  | ggtaaaaatc  | ttcctcacca  | aatccaggag |
| 41401 | cagtatgcac | aacgccagta  | ccatcttctt  | ctgtcacata  | atcagcgatg  | aaaaacgcgg |
| 41461 | aatgcatttt | ttcgtatctt  | taaagtagtc  | aaatagtgg   | ttataaggaa  | gacctgcaag |
| 41521 | atcattcgct | ttaagtttta  | tattgcagtt  | ttcatatgga  | atattgtttt  | gttcagagtg |
| 41581 | gctgataaat | ttctctaggt  | agctttcagc  | aaaaatataa  | atttcactgt  | tcactgaact |
| 41641 | cctttcatta | acttctgtca  | tcccagtgct  | tcgacactgg  | gatccagaaa  | tagattccag |
| 41701 | cgtcacgcgc | tggaatgaca  | tcaaggagtg  | aactgaaact  | gcacaatact  | caatatcttt |
| 41761 | ccctatcgcc | aaagccaagt  | tgctcggcaa  | cgtccaagga  | gttgtagtc   | aagcaagtaa |
| 41821 | tttacctttt | cgtttaacac  | ttttaaattg  | ctgtgggttt  | tctaaaagct  | caaatgcaac |
| 41881 | agttacagct | ttgctaactt  | tttctctata  | cgcgttatca  | agccttgttt  | cgaaattaga |
| 41941 | taatggagtt | tcgcatgccc  | agctatatgg  | tacaacgcgc  | attgattcat  | acaccagacc |
| 42001 | cttatcataa | agctgcttga  | atgcccacat  | gaccgactcc  | atgaataatt  | tatccatagt |
| 42061 | cttatagtca | ttgtgaaagt  | ctaccacact  | tgcttgcccta | tttacatact  | tctcccactc |
| 42121 | tgatgaaatt | ttcatcacag  | aagtacggca  | atgatcggtt  | aatttatcaa  | taccaaactt |
| 42181 | ctctacctca | gttctgccag  | atattccaag  | ttccttttct  | gtcctccatct | cagccggtaa |
| 42241 | tccatggcaa | tcccagccaa  | atctacgttc  | aacctttttt  | tgaagcatag  | tttgatatct |
| 42301 | tgcaaatgcg | tctttgatga  | aaccagtgag  | taaatgtcca  | taatgcggaa  | gtccatttgc |
| 42361 | aaacggaggc | ccatcgtaaa  | agacaaaaca  | attatccttg  | gaacgttctt  | caactgaccg |
| 42421 | ctcaaaaact | ttgttttcct  | gccaaaattt  | tatgatttcc  | ttttctaacg  | atgaaaaatc |
| 42481 | aggactactt | actgtatcag  | gataatgctt  | tgacttcatg  | ttcgctatgt  | aaaactaaag |
| 42541 | aatatagggc | tttctgaaaa  | attacaaatt  | caaaaatatt  | tccgtagctc  | acacccaac  |
| 42601 | aaactattct | gccgagcttc  | caataccttt  | ttttaagttt  | tacttgcagt  | ttttattggt |
| 42661 | ttacttaaca | ttaaccaag   | ctttaggggt  | attttatgga  | tcagaagaca  | gataagtttc |
| 42721 | cacaattttt | aaaaatgttg  | tgctttgttg  | aaatgtggga  | acgtttctct  | tactatggaa |
| 42781 | tgagggcact | tttggctcta  | tttttgactt  | ctcacttagg  | tttactgat   | gagagggcct |
| 42841 | ttactattta | ctcattattt  | gctgcaacag  | gttatgctat  | accaatactt  | ggaggttttt |
| 42901 | tagctgataa | gttgatggga  | ttccgcaaca  | tggtgttgct  | tgaggggata  | gtgatgatag |
| 42961 | caggtcatgc | ttgcatgtca  | ttgggttaagt | ttgaaccagg  | tttattatat  | ttaggtttat |
| 43021 | ctctaatagc | cataggtaact | ggtatgttta  | aagggaacgt  | aactaactta  | cttagttcat |
| 43081 | gctatggcaa | agacgatcct  | gaacgtagca  | gaggctttac  | tttattttac  | gtaggtgtga |
| 43141 | atattggagc | aatattggct  | tctatttcat  | gtgggttatgt | agcccacttg  | tttggctggc |
| 43201 | actacggctt | tggttttagct | ggtattggga  | tgtctatagg  | gctaactctt  | tttctcaaat |
| 43261 | ttcagaatct | tttaggagat  | agcggccttt  | ctccttatcc  | agagcttatg  | aataagcgca |
| 43321 | tattagggat | taaaattttt  | ggtatagtat  | tgataggaag  | ctttttgtca  | tcatcaataa |
| 43381 | ttgctaaaa  | gcttatacat  | agtgaatttt  | ttactaatat  | gctcatat    | attggaataa |
| 43441 | cagctctggg | catattttatt | tatataatat  | ctaaattatc  | agcagaacaa  | agacgaaaat |
| 43501 | tagtggcatt | atctattctt  | gtgggtatttt | tcttgtgttt  | ttttgcttta  | gaaatgcagc |
| 43561 | ttggctcttt | gggttaactta | ttcacccaaa  | gaaacgttat  | taacaatgta  | ttaggtataa |
| 43621 | caatcccagc | ttcagtttct  | caagccataa  | atcctttgtc  | aattataata  | tttggctttc |
| 43681 | tttttggaac | atacatgaag  | tttaagcaaa  | aatatgcaac  | ttccatgttt  | accttgggcc |
| 43741 | ttctgacaat | ggctatgtgt  | tttttcacac  | tgtacatagg  | atgtttaaac  | tctaacattg |
| 43801 | aaggtaaagt | agaatactta  | tatttaataa  | ttgctatctc  | ctttatggga  | ctgggagaat |
| 43861 | tatgtattgc | tccattagtc  | caagaacaag  | caactacact  | agcccccaaa  | aaccttagag |
| 43921 | gagtagtgat | gggtatagta  | atgctgtcat  | tagcgttttc  | taacctagcc  | ggagttgcaa |
| 43981 | tatcaaaatt | tatgtcagtt  | ccttcagtaa  | atggtaaaat  | aaattattta  | gaatctttag |
| 44041 | aaatatataa | agaggggttt  | ttaaagggtg  | gaatatttta  | tttaatgtct  | gttattgtat |
| 44101 | ttttattctt | cttcaatttt  | atacataaag  | ttgttactaa  | ctcatcttgt  | acaaaaaatt |
| 44161 | gatataggta | agctcaaaat  | tgtagggttt  | aggtacccgt  | tcagcagagg  | tagcaattaa |
| 44221 | actttgtaac | ttttgaaaaa  | gattatgatt  | gcattttttc  | aatactcttt  | gcttaagatt |
| 44281 | tatatttaac | gctgcttaaa  | atcagtgaag  | tgcacacccc  | agcaaaactac | tctgccgagc |
| 44341 | ttccaacact | ttcacattta  | ctattttgtc  | cctgtattta  | tcttcagaat  | catcaatgca |
| 44401 | cactgattgc | atatatgggc  | ttttaccaat  | aatgtgtgtt  | tggtgtttac  | cttttttatc |
| 44461 | gctaaataga | acaggtatag  | ttttacctac  | catactctgg  | ttaaactcaa  | gttgttgctt |
| 44521 | actaattaat | ttctgtaaac  | gaagaaggcg  | ctctgtttta  | acctcttctg  | gtacttgatc |
| 44581 | ttttctttcc | gctcccgttg  | tgcttggtct  | tggtgtgtat  | ttaaaactat  | aagcctgagc |
| 44641 | atatctaact | ttttctacta  | atctcatagt  | ttcttcaaaa  | tcttttttcgg | tttctccagg |
| 44701 | aaaaccaaca | ataaaatcag  | aagaaaattc  | gatttccaggt | ttcaatttgc  | gaaatctgtc |
| 44761 | tattattttc | aaataactcct | ctgcagtgtg  | tttcctgttc  | atcgcgtgca  | atattttatt |
| 44821 | cgaaccagac | tgacacaggca | ggtgaacaaa  | cggcatgagc  | tttggctctt  | ccgcatgtgc |
| 44881 | caagtagaga | gattcatgca  | tatctcttgg  | atgagaagtt  | gtataacgaa  | tcctctctag |

|       |             |             |             |             |             |             |
|-------|-------------|-------------|-------------|-------------|-------------|-------------|
| 44941 | cttttcaatt  | ttagcaatat  | gactaattaa  | ttttcctaaa  | tcccacactt  | cccccttcgca |
| 45001 | ctccccatgg  | taagcattga  | cgttctgacc  | aagcaaattg  | atctcatttg  | ccccatttgc  |
| 45061 | aactaatttc  | aatgcttcac  | gaaatatatt  | attcactggc  | cgtgaatact  | cagctccacg  |
| 45121 | agtatagggc  | actacacaaa  | acgtacaaaa  | tttatcacaa  | ccctcttgta  | tggcaagaaa  |
| 45181 | cgcagaagac  | ccctggctat  | tgccatagca  | ttcatctggc  | aatttatcaa  | actttgcaac  |
| 45241 | ttcaggaaaa  | tcagtgttta  | ttacatgacc  | tttacttctg  | cttgctttga  | ctatcagctc  |
| 45301 | cggtaaggta  | gcgatactct  | gcggaccaac  | aacaatatca  | acaaaaggag  | cccttctgaa  |
| 45361 | cacttcttct  | ccctctgctt  | gcgctacaca  | cccagccacc  | actatagtca  | tttcttttcg  |
| 45421 | taacgaatga  | atcttcccaa  | gctctgagta  | aagtttttct  | gctgccttct  | ctctaattgtg |
| 45481 | acaagtattc  | agtatcacta  | aatcggcttt  | ccctgcatca  | ctaacaacgt  | tgaaccccaa  |
| 45541 | aggtttaatt  | acattttcca  | ttaaaacgga  | gtcataaacg  | ttcatctgac  | agccgtaagt  |
| 45601 | tttaatatat  | aggcctttca  | tatttggtat  | gtctttttca  | aaatttcttc  | accctacacg  |
| 45661 | taaatgtcta  | acagaccagc  | gcgtgacgct  | agtgaacttg  | ctagcacaat  | agattttgac  |
| 45721 | aaaattatac  | gaaaaactgg  | atctcagtg   | caagcacttg  | gatgacaagt  | tctcggcaac  |
| 45781 | ccctacgtca  | taccatcacg  | gtatctctag  | atcccgtcaa  | caagtagcgg  | gatgacgggt  |
| 45841 | gtcagggtgt  | catgaaagta  | gctaacactg  | gcttccatcc  | aagagggcag  | tgccctcttc  |
| 45901 | ttgtcatccc  | agtgtctgac  | actgggatcc  | aggaaaaaga  | atgggtgtcat | ccgagtagct  |
| 45961 | tgacactggc  | atccaggaaa  | cttaattgca  | agtaatgcat  | tgagtgttgg  | gagtatgggt  |
| 46021 | tttgcgttat  | agaatgaagc  | acttttggtg  | aatttgtaaa  | gaaagctgga  | tcccagtgtc  |
| 46081 | aagcactgga  | atgacaagaa  | agggagcact  | ggaattttta  | tttcagtatt  | gtacattagc  |
| 46141 | catgcatctg  | aacagatacg  | agctttctgc  | tttttttggg  | taagggtcagt | caaaaagggt  |
| 46201 | ttacaacaac  | cataataact  | ataactatta  | tcaatactgt  | aactgcttca  | tttaaaacgc  |
| 46261 | gaaaataaat  | atgtgacttc  | ttattcgaac  | ccattgcaaa  | atttttccta  | tattttgcaa  |
| 46321 | gtagcatatg  | aataattaac  | atcaaaaagta | ttgcaaatgc  | ttttacatga  | aaccatcctt  |
| 46381 | cacgatatgc  | ttccctaata  | accattagtg  | taattccaag  | accaagttag  | aaaagcattg  |
| 46441 | cagggtttat  | gatatatcta  | agtagcctct  | tttccattgt  | ttgaagcaag  | ctatcatttt  |
| 46501 | ccgatcccgg  | ttttacagtt  | gcatggtaga  | cataaagcct  | gggtaaataa  | agcatacctg  |
| 46561 | ccatccacat  | gataacagag  | ataacgtgaa  | aagcctcaag  | ccagtggtaa  | tagttcatta  |
| 46621 | gcaaaaatth  | aaaattcctg  | gtattgtgtt  | agtttaatat  | aaaagaaatc  | gatatgaaag  |
| 46681 | cagaaaatth  | cactaaagaa  | cagataattg  | gattctacag  | gaaaatgcta  | ctcatagcga  |
| 46741 | gatttgagga  | aaaagcagga  | caatttatatg | ggatgggatt  | aataggcggg  | ttctgtcacc  |
| 46801 | tatcaatagg  | acaagaagca  | gttgaggttg  | gaactcaagc  | tgcatcaaaa  | ttaggtgacg  |
| 46861 | cttttatcac  | aagttataga  | gaccatggct  | taatgctcgc  | atgtgattct  | gatccaaatg  |
| 46921 | ttgtaatggc  | agagcttacc  | ggcaaaagaa  | caggatgctc  | gaaaggtaaa  | ggtggttcga  |
| 46981 | tgacgttatt  | tgacgttgaa  | aaaaaattct  | tcggcgggca  | tggaatagtg  | ggagcacaag  |
| 47041 | ttccaatttg  | cacaggaata  | gcatttgcta  | ataaatataa  | gaaaaaagat  | aatgtggtat  |
| 47101 | ttacatatth  | tggcgacggt  | gctgcaaatc  | aaggacaagt  | atatgaatcg  | tttaatatgg  |
| 47161 | catctttgtg  | ggagttgcct  | gtggtttaca  | tcatagaaaa  | taatgaatac  | gcaatgggaa  |
| 47221 | cctccgtgca  | aagggtcaact | ttagtaacag  | agttatatata | aagaggagaa  | agtttttggt  |
| 47281 | ttcctggaaa  | acaagttgat  | ggaatggatt  | ttttctctgt  | ttatgagggt  | acaagcgaag  |
| 47341 | cagcgggaaca | cacacgcagc  | ggaaaagggc  | ctatcctgct  | tgaaatgaag  | acatatcgat  |
| 47401 | atcgcggtca  | ctcaatgtca  | gatcctgcta  | cttatcgctt  | aaaagaagaa  | ggtgaagata  |
| 47461 | tgaagcaaaa  | tcatgaccct  | ataagcactt  | taaagaaata  | catgacagat  | aataaaatgg  |
| 47521 | cttcagaaga  | agagtgcaaa  | gtaattgata  | aggaaatacg  | tgatttagta  | aaaaagtcgg  |
| 47581 | aagatttttg  | caaaaatagt  | aaagaaccaa  | gcgttgatga  | gctgtatact  | gatgtttata  |
| 47641 | aatttgtttag | ctaatttttt  | tatccagaac  | tgtacaaaaca | ttgtatagta  | aacgatgtca  |
| 47701 | tccaaatagc  | tccttctccc  | gtcatccaag  | tgccctcctt  | tttttgtcat  | cccagtgtct  |
| 47761 | tgactacttg  | gatccagctg  | agttggtgag  | tataaaaagta | tagctaacgc  | aagctctacg  |
| 47821 | tcatgccgcc  | gcgaaccgtc  | ataccgcgat  | tcattcgcg   | tatctctaga  | tcccgtctaac |
| 47881 | aagcagcggg  | atgacgggtg  | tcaggctagc  | tgatcatctca | gtagtctcct  | tctcctgtca  |
| 47941 | tccgagtagc  | tgacactgg   | tcctttatga  | cggcagtaac  | cccttcgggtg | tcattccagt  |
| 48001 | gcttgacact  | ggaatgacac  | caataattga  | catttcaacta | gatattcatt  | ataaataatg  |
| 48061 | gaatgctaca  | aagtataaaa  | accatattaa  | tagaagacga  | taacgttagg  | ctggataggt  |
| 48121 | acatcagaag  | aatctttcct  | gatctaaagc  | aatctgtaat  | tgaaaaatct  | ttaaggaaag  |
| 48181 | gattaatcaa  | agttgatgat  | tgcaaaagca  | agtccagtga  | tagagtaaat  | tctgggcaaa  |
| 48241 | ctataacgct  | gaagcacttg  | aattatatth  | aaaacgctaa  | ttctgatcgc  | aaatataatg  |
| 48301 | aaaagttagt  | gaatctacta  | agagagaaca  | tattatatga  | agacgaatat  | atactagcta  |
| 48361 | taaacaaacc  | cgcaggggtc  | atcgttcaag  | gtggcgtaaa  | agtaaagatt  | agcatgagtg  |
| 48421 | atthgcttga  | ccaaataaga  | gaggagaaaa  | catttaaaat  | tgtccatagg  | ctagatagag  |
| 48481 | atacgagtgg  | agtgataata  | ttcgcacgca  | acgctaattg  | tgccagatac  | cttatggaag  |

|       |             |             |             |             |             |            |
|-------|-------------|-------------|-------------|-------------|-------------|------------|
| 48541 | aattttaaagg | acgaagagta  | aaaaaaactt  | atntagcatt  | aacttctggc  | ataccgagca |
| 48601 | aggatagtg   | aacaatagac  | tatccattgg  | tgaaaaaata  | tgtttcagg   | caagaaaaag |
| 48661 | tggtcgttga  | tgaaaattca  | cctcagaatg  | ccactacgca  | tttttcaatt  | atagcaaaat |
| 48721 | ccaaacacaa  | tggtgcttat  | ttaaaattac  | aaccaattac  | cggcagaacc  | catcagttac |
| 48781 | gtgcacattt  | agctcatata  | aattgcccta  | ttcttggtga  | cggtaaata   | ggtggtaaaa |
| 48841 | aagcctttat  | tgatgggata  | gcaaataaaa  | ttcaccttca  | ttcgcattct  | ttatctttaa |
| 48901 | aactgccaaa  | caataaagaa  | atcactatca  | ccgctcctat  | cactaaacac  | atcgaaaaat |
| 48961 | ccattgaagc  | gctatttttc  | gactgaaacg  | atttcaccaa  | tcaacttttc  | tgtctttggc |
| 49021 | tttaatttga  | agcacagata  | ttaggcta    | taatgtgcag  | gcagtaagat  | aaatgcctgc |
| 49081 | tgcaagtttt  | gtttcggttt  | tttctataag  | ccacatgcat  | atgtatggag  | aaaggccacc |
| 49141 | aaaaattcct  | gcagatatata | tatttgctaa  | gcttacgcca  | gtgcatctta  | cttttggtgg |
| 49201 | aaacagttca  | caaataacag  | aaccatatata | tccaaaagat  | gcacctactg  | gtatagta   |
| 49261 | caataagtaa  | gttattatta  | cgacatagtg  | gttaacggaa  | gataataatg  | gtaatacaca |
| 49321 | tgtaccaatc  | agagatagca  | taatcagtac  | aggaatcatt  | acgcgttttc  | ttccaacttt |
| 49381 | atcagataaa  | attgcaaaaa  | gtaccgcaga  | tgctgcaaat  | acaacctgta  | ttactatcct |
| 49441 | cattaaatct  | ttaacactaa  | tagataaaat  | aactagctct  | tttattgata  | tattataaaa |
| 49501 | cattattgct  | gcgtagacaa  | ttgcattctg  | agcaattccc  | agattgattg  | aaataataag |
| 49561 | cggctcttta  | tagtttctta  | ctagttctaa  | caatggtgaa  | tgtgctaaat  | tattagcgta |
| 49621 | cttattagtt  | ttatatgcta  | agctttcttt  | taatatgtac  | ctagttaaaa  | aacctattgt |
| 49681 | ccccaaaaaa  | aagcaaaaat  | aaaaaagcaa  | cttccatccc  | catatttcat  | agttctcacc |
| 49741 | tgtaactctt  | ttgcagataa  | atatcattgt  | tatgcataag  | agcgttccaa  | gggctccgct |
| 49801 | aaagggtctt  | atacttcccta | agaaacctag  | atttttttta  | tcttttgaat  | gctctatcgt |
| 49861 | aaatgctgta  | ttaatgcttg  | tttcacctcc  | tgcagttatt  | ccttgcaacta | ttctacaaaa |
| 49921 | cacaagcaat  | acagggtgaaa | gcaaccctat  | ttcttttatac | ccagggtataa | ttcccataat |
| 49981 | tgtggatgat  | attgaaatta  | atattactga  | agtaagtaaa  | gtctttcttc  | tgccatactt |
| 50041 | atctcccata  | taaccaaaaa  | ttactgcacc  | aattggtcta  | aacgcaaaac  | caattgcaaa |
| 50101 | aacaccaagg  | aatttgagtg  | tactcaaata  | atgatcttct  | gatgggaaaa  | aaacgttgat |
| 50161 | gattgtatct  | gttaataactc | caaaaagagt  | gagttcatac  | cacacaatca  | tgttacagat |
| 50221 | catgcccgat  | agtattgctt  | ttcggatatt  | attcatggct  | tttcaattta  | acataaccta |
| 50281 | atatatcatt  | aaccgggtgct | ccttgctata  | aaatttttca  | ttcaataacc  | ttcaaggata |
| 50341 | attcacgtaa  | atgcttatcc  | tccaccttgg  | aaggagcacc  | cattagaaca  | tcttcacctt |
| 50401 | gctggttcat  | aggaaaacag  | attacttcac  | gaatatattgg | ctcatcagca  | agcagcataa |
| 50461 | ctattctatc  | aactcctggt  | gctattccac  | catgaggagg  | aacaccaa    | ctgaatgcac |
| 50521 | gtacaagtgc  | accgaatctt  | gtatcaactt  | ctccccggct  | ataacctgca  | atggcaaaag |
| 50581 | ctttatacat  | gatataccagt | ttgttattac  | gaatcgcccc  | acttgacagt  | tctattccat |
| 50641 | tgcaaacaag  | atcatattgg  | taagcaagga  | tatccagtg   | atttttgtcc  | tctaaatctt |
| 50701 | tcagaccacc  | gtgtggcatg  | gagaatgggt  | tatgaaagaa  | atctattttt  | ttacttttat |
| 50761 | cgtcatatac  | aaaatatgga  | aatcaatga   | tccaacaaaa  | cttgaagata  | ttatcatcta |
| 50821 | taaaactgag  | ttctgaccct  | aaaagagtgc  | gtacttttcc  | tgcaatgttt  | gccgcctcat |
| 50881 | tctctttgtc  | agaagcaaaa  | aatacactat  | ctcctggctc  | tatgtttgtt  | gcttctctta |
| 50941 | tgtggtttag  | cctatttttca | tcaagaaatt  | tagcaattgg  | gcctttcgca  | gttccatctt |
| 51001 | tatcaaactg  | tatatatcca  | agacccttag  | caccgaattc  | tttttgcgca  | tgttctatct |
| 51061 | ttttatcaaa  | gaagctgctg  | ggttcctctg  | ctgttttagg  | tgcagggatg  | gctctcacta |
| 51121 | ccataccacg  | ctcaatattg  | cttttgaaaa  | tattgaacct  | tgaatcacga  | aaaatttctg |
| 51181 | taacatcgct  | gattaatagt  | ggattacgca  | aatctggctt  | gtcagaacca  | tacttaagca |
| 51241 | ttgcctcttt  | gtatgtaatg  | cgtggaaaa   | ctttatcgac  | agacttgca   | gaaaatttgg |
| 51301 | cgaacacttt  | atataaagca  | gattcaataa  | cgtcaaatat  | gtcctcttga  | gtcacaaaag |
| 51361 | acattttcaag | atctagctga  | taaaactctc  | ccggagaacg  | gtcagccctt  | gcgtcttcat |
| 51421 | cacgaaaaca  | tggtgcaatt  | tggaaatatt  | tatcaaaacc  | tgaaccatg   | agcaactgtt |
| 51481 | tgaaaatctg  | cggagcttgt  | ggcaatgcat  | agaacttgcc  | aggatttagc  | ctgcttggca |
| 51541 | ctaggtagtc  | gcgtgctcct  | tcaggagagg  | aagcagtgag  | tattggaggt  | tgaatctcta |
| 51601 | aaaatcctcg  | ctctatcatg  | agcttgcgga  | gctctgcaat  | aatttgtgag  | cgcaaaaata |
| 51661 | tattgttgcg  | gactttttca  | cgtcttaagt  | caagaaatcg  | atattttaa   | ctcatgtttt |
| 51721 | ctgggtattc  | ttgctcgccg  | gtaatgcttg  | ccaatatact  | tctttcttct  | tttgctattt |
| 51781 | cttcatcaaa  | gtggaactca  | acttccgact  | caacgcgcaa  | attgttgact  | atcacctcga |
| 51841 | tttctccggt  | agaaatagag  | ctgtttaccg  | tatcttcagt  | tctagcttca  | actattcctg |
| 51901 | taacagtaat  | tacactctcc  | aatttttaaa  | ttgatatctc  | atcaaaaaag  | tctttgtcat |
| 51961 | tattaaatac  | tagctgagtg  | attccgtaga  | agtcctttaa  | atcaacaaaa  | attaggttac |
| 52021 | catggctcg   | cttacgatata | aaccatccag  | aaagggtaac  | ttccttttct  | acgtcgttct |
| 52081 | tcctcagttc  | attgcacgta  | tgagttttat  | agcagttcat  | atttgtttta  | cttctaaatt |

|       |             |             |             |             |             |             |
|-------|-------------|-------------|-------------|-------------|-------------|-------------|
| 52141 | ctttaagaag  | tatagaaata  | aaccttatta  | catacaagcc  | cgttcgtcag  | atattttgcgc |
| 52201 | aatttttcgaa | atagagcagt  | actgctttta  | tattgtcttt  | acccgcaaaa  | aaattgcaca  |
| 52261 | atctctataa  | ttatggtata  | atagcaaggg  | tatttttaat  | gaattagata  | caggaaatgc  |
| 52321 | cacttacaca  | gatcatatta  | tatagcgtaa  | cattacttgc  | tgtagctgca  | gtattttctct |
| 52381 | ttttgagaaa  | aatatacaaa  | aatcgcatta  | gaaaaatcat  | atctcctaga  | aaagttttta  |
| 52441 | aagaagagtg  | ggaagaagac  | agaaaattca  | atgaattata  | tcaaaaaaat  | aagcaaaaag  |
| 52501 | agttgctgaa  | acaacaagaa  | acgctacgcg  | agaaacaaaa  | agatgtgcaa  | gtttataaag  |
| 52561 | aagatccaga  | aatagttgac  | atagcaaaac  | cggtaggtaa  | atggacaaag  | atggttatga  |
| 52621 | tgggtaaatgg | tttaatgcag  | cgttttgcac  | aattgataca  | tagagaaggc  | ggacagaaag  |
| 52681 | gattttggga  | gctgtttgta  | aaagctcagg  | cttcaactca  | aggtaaacad  | aagggaaggg  |
| 52741 | gcagataatc  | catgcttgaa  | tgtgaaaatt  | tatcctgcac  | tcgtaataat  | aagggtactat |
| 52801 | ttaagaatct  | cagtttttaa  | gctgagctaa  | aatcaaagat  | tctaatacact | ggtccaaatg  |
| 52861 | gtagtggttaa | aaccagctta  | attagaagtt  | tatctggact  | tttaccgccg  | gtatcaggca  |
| 52921 | atataaggca  | ctgcggaaaa  | gatataatg   | atgatccaaa  | atcctatata  | tcttctatgg  |
| 52981 | tctatatagg  | ccataagaat  | gcctgtaaag  | atagcttaac  | tgttgctcaa  | aacgtagaat  |
| 53041 | tctgggcagg  | aatacgaaat  | actagagaat  | tgattgtggc  | agctattttgt | tgcttgacgt  |
| 53101 | tgcaacctgt  | acttaatat   | agatatggcg  | aactttctgc  | aggctggaaa  | aggagagttg  |
| 53161 | cgcttgctcg  | cctcttgatt  | tctaatacaa  | acgtttggct  | gatagatgaa  | ccattttgta  |
| 53221 | atcttgatag  | tgcaacgtgt  | gaattagtgc  | tgaacttaat  | ctcaatacgc  | tctgagcaaa  |
| 53281 | atggtatagt  | aattattaca  | gggcatagct  | ctacagagca  | attgtgtgat  | tttacaacga  |
| 53341 | ttgatatacg  | cgatttcaat  | agacttcttg  | catagttttt  | ggcagcacgt  | taacaaccat  |
| 53401 | tagaaacgaa  | aaaacttcct  | tgacaaaact  | cgccagcctc  | cttatcatga  | aactgaagct  |
| 53461 | atatttttat  | cttctctgta  | cagattaaat  | gacaaaaaaa  | ctcacgtatc  | tggcgtctca  |
| 53521 | tgtttaattt  | tttgcaactat | gtgcactcta  | tgtctttatc  | aaattttctag | gtttttacct  |
| 53581 | atacaagctg  | aaatacgctt  | ataaagcatt  | taaaacatca  | aaaaacgcc   | acttaaaaaa  |
| 53641 | tggatagtga  | ataattagct  | accctagggg  | ttcttttgcc  | tttttttctg  | tttagtaaat  |
| 53701 | ttcttaaaca  | tttatgacta  | aagggttagtt | gcattaaaaa  | gcagctaaat  | cgcggttatt  |
| 53761 | aagcgtttag  | aataaaaaaa  | cgccatactt  | gaaagtataa  | tgtaagtaat  | tagccaacta  |
| 53821 | cggggccttct | tttgccctttt | tttttatattg | gtaaatcctc  | taatgtttat  | ggctaaacga  |
| 53881 | caaccgtcat  | cccgtgctt   | gtagcggtt   | aagggtatgac | gcgaagggat  | actgcgaatg  |
| 53941 | aatcgcggtg  | tgacgggttaa | ttattctgctg | gcgggtatgac | gtagagctcg  | cgtagctat   |
| 54001 | actttttatac | tcaccaactc  | agtatccaat  | ctggatccaa  | gtagtcagct  | acttggtatga |
| 54061 | caccctgttg  | aggctgcgct  | tacacattcc  | actttctatg  | ctcaccaaac  | aaatttgctt  |
| 54121 | attcgagca   | aaattttctg  | gatccaagta  | ttcagctact  | cggatgatata | ctttgtgttt  |
| 54181 | gaagcaaaac  | cagctataaac | atcttctgcg  | aaacaaatgt  | tcgtacagtt  | gtgcgcgtga  |
| 54241 | tgctggaatc  | tagacaacaa  | ttagatcccta | ttgtcaagca  | ataagctaca  | tgtgctat    |
| 54301 | attagtaga   | ttaaatatga  | agtttaaaac  | tctgctattg  | acttcctgta  | gaactagtga  |
| 54361 | aaaccaaaact | tgcttaaaac  | cacttaatta  | gttatagtta  | taagtttagg  | tacagcaaaa  |
| 54421 | tgacagcttt  | tgtccccctg  | attat       | taatcttgta  | tcttggaagt  | ggtgcttatt  |
| 54481 | tttcttttat  | cggaactgat  | aatccacttc  | atcagggttc  | accagtaatc  | tgcttattac  |
| 54541 | cagcactatt  | ttttgctgtc  | tcacgtggta  | caaataaaat  | tcagcataac  | atcgatactg  |
| 54601 | ttatcaaggg  | catgggtgac  | aaaaacaccc  | ttactatgtg  | tttaattttt  | ttattttctg  |
| 54661 | gagcattttc  | tgcggtgact  | caatcaatcg  | gtagcgagca  | cactgttgct  | aatttaattc  |
| 54721 | ttaatttcct  | tccagcaaga  | ttactgctgc  | ctggagtatt  | tttggttct   | gcttttattt  |
| 54781 | caactgcaat  | tggcacatct  | atgggagttg  | ttgcgctgat  | ggtacctata  | gctgttaatc  |
| 54841 | tggcaaaaag  | tggagctttt  | ggtctcgaaa  | taggaactgc  | aactgtagta  | ggtggtgccg  |
| 54901 | tgtttgcgga  | taacctttcg  | atgatatctg  | ataccaccat  | tgcactgtgt  | tcttcacagg  |
| 54961 | aagcttcagc  | aaaagataaa  | cttaaaatga  | actctaaagt  | tgcaacttatt | gccagcatta  |
| 55021 | taacactcat  | ctacctagca  | gttgccctcaa | atagtacaaa  | aattattttct | atatcaaatt  |
| 55081 | tagattatta  | ttctataata  | aaaattatct  | cttacatttc  | tttaataatc  | atggggctgc  |
| 55141 | ttgaagtcgc  | cacttttagta | acaataacta  | taaacataat  | tattgctggg  | gtgctaggaa  |
| 55201 | taactttttt  | tgactatgct  | atcattcaat  | ttcctcatga  | cgtgtatgac  | ggtttcaaaa  |
| 55261 | aagtaaacga  | aatagtata   | tttgctctat  | ttatcggtgg  | attgagccat  | ataatgtaca  |
| 55321 | agcaaggtca  | aaaagcggtg  | cataaactca  | tcgatgaaag  | caatatcaca  | aaaactaaag  |
| 55381 | ctgaattttgt | gatagtagga  | attgcgtcta  | tgtttactac  | cttagttgcc  | aataatacca  |
| 55441 | ttgctat     | actaagtggg  | ggcattgcaa  | aaaggcttgc  | acaaaaacac  | agtattgcgc  |
| 55501 | cacatcgag   | cgcatactta  | ttagatgttt  | ttgcttgtgc  | tacaaaaggg  | atcttacctt  |
| 55561 | atggttccca  | actattgcta  | gcaggtagca  | tcgcctctgt  | atcacctatt  | tctttattaa  |
| 55621 | cacaggtata  | ttattgcttt  | attctagcgg  | cagttacaat  | aggcgaaata  | atcatcaaca  |
| 55681 | gcagaaaaga  | gaaacattgt  | gcggctgcaa  | cttagagttt  | ctcttttttt  | accataaagg  |

|       |            |             |             |             |             |             |
|-------|------------|-------------|-------------|-------------|-------------|-------------|
| 55741 | aacggaatta | cttgacaccc  | tttgccaacc  | cccttatcat  | gaaactgaag  | ctatttat    |
| 55801 | atcttcgcaa | tctgtgcagg  | ttaatgacaa  | aaaacttagg  | gtatttggcg  | tctcatgttt  |
| 55861 | aatttttcgc | actacgtgca  | tcgcatgtct  | ttaaaaaatt  | ctgggttttt  | acctatataa  |
| 55921 | gccgaaacgc | gcttacaaag  | cgtttaagac  | agcaaaaaaa  | cgtcaaattg  | acaagggaga  |
| 55981 | atgtgaatgc | tagctactac  | ggggtttctt  | tgcctttttt  | cctgcttagt  | aaatttctta  |
| 56041 | aacacttgcg | gtgtaggtta  | gttgcaagtt  | aaaagcagct  | aaatcgctct  | taatcaagcg  |
| 56101 | ttttagaata | aaaaaaacgc  | cgatatttta  | gtacatagta  | aatagccaac  | caccatgggg  |
| 56161 | cttcttttgc | cttttttttc  | atlttggtaaa | tttcttaaac  | atlttatagtt | gcaatttaag  |
| 56221 | agcccgtaaa | gggtgtcatt  | ccagtgcctc  | tgtgatgtat  | tccagtgcct  | gacactggaa  |
| 56281 | tacagttttc | catataatct  | catcgaaaat  | gttgtaacca  | ctttccatgc  | tagtttgctt  |
| 56341 | gttcacaagc | aaacttttct  | ggatcccagt  | gtctgggcac  | tgggatgaca  | agagaaggta  |
| 56401 | ctagcctgac | accctgacaa  | ccgtcatccc  | gctgcttggt  | agcgggatct  | atgctaattg  |
| 56461 | cctttttatt | tttcaattat  | gttattttcca | tttaaatctg  | tctgtttccgc | aacttcagtg  |
| 56521 | aatacagttg | aatactccct  | aaaactgatt  | gtcataactt  | taccctactt  | tgaataatag  |
| 56581 | aggttgctcg | gaaactagta  | aattcaagca  | tattccctct  | ttaacataac  | cctactcata  |
| 56641 | gctaggtata | tgaatttctc  | agtggatggt  | gtgagtaaat  | catactcctt  | cgatagcctt  |
| 56701 | ctattcctat | taacccaagc  | aaaagtcctt  | tctacaaccc  | atcttcttgg  | ctgtacttta  |
| 56761 | aacccttggt | ctcttggttg  | tagtagctca  | gggtggcgat  | ctttgtgcac  | ccaaaatcta  |
| 56821 | catggaggcc | ttttaacaat  | ttcaatatct  | atgtcatatt  | cttcctttat  | gtgattcttt  |
| 56881 | aaatttcttc | cttggtatcc  | catgtcagcc  | cacatttttt  | taacttttagt | atattttggt  |
| 56941 | ctcatattgt | ttaatgctat  | tttaatacca  | tctctatcat  | tttcgttagc  | agcgcctacg  |
| 57001 | taacaaccta | gtataaaacc  | ctgagtgtct  | gtaattatat  | gcctttttct  | accctttact  |
| 57061 | tttttacttc | catcatagcc  | tttgatcccc  | ccttttctgt  | agtctttaca  | gattgactat  |
| 57121 | ctactataca | ggcactcggc  | tgctcattcc  | ttcctatttt  | tcttctacta  | tattttgtaa  |
| 57181 | tttcataatt | cattttctca  | aaaattccct  | gcttcttcca  | ttgcctgaac  | tgctcataca  |
| 57241 | cagtcttcca | tagcggaaaa  | tcatttggtg  | aataccgcca  | ttgacaccct  | gtacgcaata  |
| 57301 | catagaaaat | tgcttctaatt | atlttctctt  | tgctataact  | tggcggcctt  | cctcctttct  |
| 57361 | tgtatgatac | tctgaagtgt  | ttttctattc  | ttgcccattc  | cctttcgcct  | agatctgttg  |
| 57421 | gatacttttt | tctcatcttt  | accccgtaact | aaaatttcag  | atattatagc  | cttttactta  |
| 57481 | tttccggaca | acctctaact  | ttgctatatt  | tctctctaga  | ttcttgcaaa  | gttctacaag  |
| 57541 | attaaccaca | ttacctcacg  | gtttctctat  | gattattttt  | ttagattact  | tgtttacctt  |
| 57601 | atlttgccgt | ctcctgaacg  | aatatacata  | agctataaaa  | actatctaatt | agctacccaa  |
| 57661 | aacccttatt | tcccactcaa  | gttcaacatt  | aaatlttatcc | tttactgcatt | cttttacttt  |
| 57721 | gttgccaagg | ttttccaagt  | cagatgcagt  | tgcattatcg  | taattgagca  | agaagttaca  |
| 57781 | atgtttctga | gagattctag  | ctccaccaat  | atlttaaccct | aggcagccag  | atlttatcaat |
| 57841 | taactcccat | gctcggtagt  | tttttggtat  | tttgaatatg  | caccagcagc  | tttttctctt  |
| 57901 | tattggctgg | cttttatatt  | tcctctcaat  | aacttccctt  | aacctttgca  | gtataagctc  |
| 57961 | atactctgag | tttactcctt  | taaactcagc  | ttcaacaaaa  | atccaatttt  | cttttaggct  |
| 58021 | atgtccacgg | taaaaataacc | ccatttcttc  | gctggagaac  | tcatatagggt | ttccatcctc  |
| 58081 | tagattcact | gctttttatg  | attgtacaac  | acttgcgata  | tcactaccat  | atgcacctgc  |
| 58141 | attcattttc | attccgccac  | caactgttcc  | tggaattcca  | actagaaaact | ccaaccactt  |
| 58201 | aatctgctga | tttcccgcga  | agtgaagaa   | gttgctgagc  | agcacagctc  | ccccagctac  |
| 58261 | aatagagttg | ttacccttac  | ttttaatata  | tgcaaaactcc | ttacctaat   | ttactgttat  |
| 58321 | tcctcgaatg | ccactatctc  | gcactattat  | gttggtatgt  | gcaccaataa  | cgctaactgg  |
| 58381 | cagttcagta | tttttaataca | agtatgttaa  | atcttcaata  | tcacatgggt  | taaaataatac |
| 58441 | atcagctcgt | ccaccaacat  | ttaaccacgt  | cgttttagac  | attaagacat  | cataacgata  |
| 58501 | gattccacgt | acttttaggt  | agcttataag  | catttttgatt | tcaactctaa  | tcctgcattc  |
| 58561 | atacccat   | tctccgcatt  | ttctataaat  | gaagtgcgct  | cagtgaagta  | tatatTTTTT  |
| 58621 | ccacttgcta | acatacaacg  | aaggtgtagc  | atattttcgc  | tcacatat    | agccaaagct  |
| 58681 | gcaagtgggt | taaaacatga  | accattcact  | gtcttcataa  | aactgcgctc  | tgattttact  |
| 58741 | cctataaaa  | acataattatt | attaattttc  | tctaaaagat  | cgataatttt  | tacatcattc  |
| 58801 | cttctacatt | gaatacaaac  | cgccccctgc  | ccactgcac   | ttaacataac  | ttttggtggc  |
| 58861 | aatacctctg | taatcaagtg  | atgtttttct  | aatcttatga  | gtcctgcttc  | agctagaatt  |
| 58921 | attccatcaa | aactttgatt  | ttgcaatctg  | gttggttacct | ttccacgtag  | cggtagctata |
| 58981 | tttaaatctg | gtctaacatt  | taacaactga  | acttttcttc  | ttattgaaga  | agtggcaata  |
| 59041 | gtagcctgct | gtggcaaaaga | ctcaaggcta  | ttgtgtttat  | gagaaataaa  | cgcatcgcat  |
| 59101 | gaacttagcc | tttctaaaac  | acaaggaatt  | gttaaaccct  | ctgagaaaaa  | cgcaggcata  |
| 59161 | tcttttagcg | aatgaactgc  | catgtctata  | ttattttcga  | gcaattcagt  | ctcaatttct  |
| 59221 | ttaatgaata | atcctttgcc  | tcctattttc  | gcaagatttg  | cgtttgcata  | cttatctcca  |
| 59281 | gaagttttta | ttttaacaat  | ttcaatagat  | aagttaggaa  | aagaatccag  | caacttttgt  |

```

59341 tttgcttcca aagcctgggc aactgcaagc ttgcttcctc tggtagctat tttgactagc
59401 atgtgtacga ctgtttgaat accaaacttt aacctaatta attacttaaa cacttttgga
59461 gcgtgtatcg catgaacctc gggtaccctc tctctgatgt cattcaagta cttggatcca
59521 gtttaattca tcatatgagc ctttgctttt attgtacttt aacttaaaac caaaagcaac
59581 tttgacttta caaaataata accttttata tgcataaata agcttactgg attctagtag
59641 ttgcatgaca aggtataaac cttatcgta taccaccgag aaccgtcata ccgtcacggt
59701 atctctagat cccgctaaca agcagcggga tgacggttgt cgtttagcta taaatattaa
59761 aaaatttacc aagcgaaaaa aaaggcaaaa gaagccccgt ggttggttag ttacttacat
59821 tatactttca agtatggcgt ttttttattc taaacgtcta ataaccacga ctcagctgct
59881 tttaagctgc aactaatcta aattataaac attaagaaat ttactaaaca gaaaaaaagg
59941 caaaagaaac cctagggtag ctagtatttc actatccatc ttttaagttg gcgtttttta
60001 atgtttttaa tgctttataa gcgtatttca gcttggttag gtaaaaacct agaaatttga
60061 taaagacata gaggtcacat agtgcaaaaa attaaacatg agacgccaga tacgttgagt
60121 ttttttgtca tttaatctgt acagagaaga taaataaata gcttcgtttt catgatatgt
60181 ataacaatgt tacaaaaaat aatatcatag aattcaatag gataattcct agaaaacccc
60241 tacatactaa aaaaagcaaa atgctgttaa aatgagctta agaataaata gcaaaccatc
60301 aacataacaa ttctatttgt aaatcagggt agacttatcc tatagaaagc tttcgaacta
60361 cgcaagcgta tcttttgcct ttagtatttc tttaaacctg ctgcaaaaga gtaggaatgg
60421 ttataaaaata gggagggtata gcaagagaat agagagggaa gatgagctta aactaccata
60481 atctaaaaga acatccgaga aattttcgag atgtaacagg tttgaaaata gaagaattcg
60541 aaaaggttgt agaaaaagtg cgcccagagt gggaaaaagt tcaagaacag aagaaatgcc
60601 atggaagaac gtcaagattg cctgtattgg aagataaaat actctgtata attc

```

//

```

LOCUS      JAQZAU010000069      1936 bp      dna      linear      ENV 17-MAR-2023
DEFINITION MAG: Wolbachia pipientis isolate wEsol contig_40194, whole genome
            shotgun sequence.
ACCESSION  JAQZAU010000069 JAQZAU010000000
VERSION    JAQZAU010000069.1
DBLINK     BioProject: PRJNA929258
            BioSample: SAMN33142973
KEYWORDS   WGS; ENV; Metagenome Assembled Genome; MAG.
SOURCE     Wolbachia pipientis (insect metagenome)
ORGANISM   Wolbachia pipientis
            Bacteria; Pseudomonadota; Alphaproteobacteria; Rickettsiales;
            Anaplasmataceae; Wolbachieae; Wolbachia.
REFERENCE  1 (bases 1 to 1936)
AUTHORS    Fiutek,N., Couger,B.M., Roy,S., de la Torre,J.R. and Connor,E.F.
TITLE      Genomic assessment of the contribution of the Wolbachia
            endosymbiont of Eurosta solidaginis to gall-induction
JOURNAL    International Journal Molecular Sciences
REFERENCE  2 (bases 1 to 1936)
AUTHORS    Fiutek,N., Couger,B.M., Roy,S., de la Torre,J.R. and Connor,E.F.
TITLE      Direct Submission
JOURNAL    Submitted (10-FEB-2023) Biology, San Francisco State University,
            1600 Holloway Ave, San Francisco, CA 94132, USA
COMMENT    ##Genome-Assembly-Data-START##
            Assembly Date      :: JUN-2019
            Assembly Method    :: FLYE v. 06-2019
            Genome Representation :: Full
            Expected Final Version :: Yes
            Genome Coverage     :: 100.0x
            Sequencing Technology :: Illumina HiSeq; PacBio Sequel
            ##Genome-Assembly-Data-END##
FEATURES   Location/Qualifiers
            source              1..1936
                                   /organism="Wolbachia pipientis"
                                   /mol_type="genomic DNA"
                                   /submitter_seqid="contig_40194"
                                   /isolate="wEsol"
                                   /isolation_source="galls on Solidago altissima"

```

```

/host="Eurosta solidaginis MN-2018-EFC"
/db_xref="taxon:955"
/environmental_sample
/country="USA: Cowling Arboretum, Carleton College,
Northfield, MN"
/lat_lon="44.48 N 93.13 W"
/altitude="280 m"
/collection_date="2018-11"
/metagenome_source="insect metagenome"
/note="metagenomic"
gene      360..458
          /locus_tag="wEsol_00843"
CDS       360..458
          /locus_tag="wEsol_00843"
          /codon_start=1
          /transl_table=11
          /product="hypothetical protein"
          /translation="MSTINDAEDKKKVIRDLVTKSIKNVVLSPMLI"
gene      501..1163
          /locus_tag="wEsol_00844"
CDS       501..1163
          /locus_tag="wEsol_00844"
          /codon_start=1
          /transl_table=11
          /product="hypothetical protein"
          /pfam="SDA1 Sigma70_r1_2"
          /translation="MMLYLYSGINVLESSEDEEDI PSNSDDSKLDDDDTWP NITATLV
QNDDPVRIYLQDMSSVKLLSRADEIEIAKKIESEKHNMLRAIIETS VTLKVIKVWRDD
LSSGALLLREIIDLD AIYNSDFNVVPKEESEENAEDVEDSEDVSEDAEYCS DDEKDSK
KSDDEKDGDNEDINSANLNVSIEMESDLLPKVIVALDEIITLTNEALVLRKIVKIPL
MI"
          /besthit="qcoverage 93.6363636363636 , hcoverage
31.839258114374 , similarity 97.6 , identity 97.1 ,
evaluate 5.29e-109 , alnlength 206 , Bacteria ,
Proteobacteria , MBV2146017.1 RNA polymerase sigma factor
RpoD [Wolbachia endosymbiont of Pissodes strobi]"
gene      1775..>1936
          /locus_tag="wEsol_00845"
CDS       1775..>1936
          /locus_tag="wEsol_00845"
          /codon_start=1
          /transl_table=11
          /product="hypothetical protein"
          /pfam="Sigma70_r3 Sigma70_r4"
          /tigr="TIGR02393 RpoD_Cterm 238 RNA polymerase sigma
factor RpoD"
          /translation="MVEVISKINRALRKMTHMGREPTLEELSVELTMPLERIRKVMK
IARDLVSLEA"
          /cog="RpoD COG0568 342 DNA-directed RNA polymerase, sigma
subunit (sigma70/sigma32)"
          /besthit="qcoverage 100 , hcoverage 30 , similarity 98.1
, identity 96.3 , evaluate 2.46e-24 , alnlength 54 ,
Eukaryota , Arthropoda , GFQ69014.1 RNA polymerase sigma
factor RpoD [Trichonephila clavata]"

```

#### ORIGIN

```

1  aaaatgatag ggaagcgtct tccaagcatc tgttttgttg ttttaatatc ttaggatata
61  taaaaagttc tttggcctcc tatatgggtt ccaattttta ttcatatagc atcctataca
121 tctgttttaa tgcttactgc tatagtgggt ggaattgcaa cattttcagt tggattgtcc
181 atagcagtaa aaaatggaag aaagtatgga acaattgatc aagacaagtg tacataaatt
241 aacagtatct taaactatat gagtaacgaa tagccacaag ttaaaagtaa aattatagac

```

```

301 ttgctcgttg taagtttatt tgttaataag aaataaaaatt ataaactata aaggtaatga
361 tgtcaactat taatgatgca gaagataaga aaaaagttat cagggatctt gtaactaaaa
421 gtataaaaaa tgtggttttg tcacctttga tgatataaat gataaattat cagatgaaaa
481 tttttcgtct gattttatag atgatgctat atctttattc cggaattaat gtgcttgaaa
541 gtagtgaaga tgaagaagat attccttcca acagtgatga tagtaaaactt gatgatgatg
601 acacatggcc aaatattact gcaactttag taaaaaatga tgatccagta aggatttatt
661 tacaagatat gagctctgta aagcttttgt caagggcaga tgaaatcgag atagcaaaaa
721 aaattgaatc tgaagaagcat aacatgttac gtgcaataat tgaaacatca gtaacattaa
781 aggtgataaa agtatggcgt gatgatttaa gtagtggagc tctcttactg agagaaatta
841 tagatctgga tgcaatttat aactctgact ttaatgtggt acccaaagaa gagagtgaag
901 aaaatgctga agatggtgag gattctgagg atgtttctga agatgctgag tactgtagtg
961 atgatgagaa agatagtaaa aaaagtgatg atgagaaaga cggtgataat gaagatataa
1021 attcagcgaa tttaaatggt tctattcttg aaatggaaa tgacttattg ccaaagggtca
1081 tagttgcatt ggatgagata attactttta caaatgaagc attggtatta agaaaaattg
1141 taaagattcc tctgatgatc tagagaattt atatagtcaa atatggtcta tagcattaca
1201 aattaagtta agtgatgctg ctggtgccag aattacacaa gaactttata agataaatag
1261 atccatcacg ctggaagagg ctaatcttat tgctgaggct agaaaatacg atatcgatag
1321 agaaagtttc tataaagttt atgatgacgt gctttttaaag cacgaattga aaaagataat
1381 tctttttaaag atcaatgaaa atcagtcctc ttttacaggt gaattaaaaa caaattttta
1441 aggttttatag acgataactc tgaacatata gctagtattt tgaacggtat taagcagcat
1501 atacaggaag ataacgtgca agaatttaag gagctaatac ggagaatata aaaacacgaa
1561 cgagaagtct ctgaagcaaa gcaagagatg actaaggcta acttaaggct agtagtttcc
1621 attgctaaga agtattcaaa agaggccttg atttgcttga tttgatacaa gaaggcaata
1681 ttggtcttat gaaggccgtg gcacttggtg ggtaagacaa tcaatcacta gggcaatacc
1741 tgagcagtct aaagtagtta gaataccagt tcatatggta gaagttatca gtaaaatcaa
1801 cagagcatta agaaaaatga ctcatgagat gggaagagag ccgacgttag aggaattaag
1861 tgtagaactg acaatgccac tggaaagaat acgcaaagtt atgaaaatag caagggacct
1921 agtaagtctt gaagct

```

//

```

LOCUS      JAQZAU010000070              785 bp    dna        linear    ENV 17-MAR-2023
DEFINITION MAG: Wolbachia pipientis isolate wEsol contig_40278, whole genome
            shotgun sequence.
ACCESSION  JAQZAU010000070 JAQZAU010000000
VERSION    JAQZAU010000070.1
DBLINK     BioProject: PRJNA929258
            BioSample: SAMN33142973
KEYWORDS   WGS; ENV; Metagenome Assembled Genome; MAG.
SOURCE     Wolbachia pipientis (insect metagenome)
ORGANISM   Wolbachia pipientis
            Bacteria; Pseudomonadota; Alphaproteobacteria; Rickettsiales;
            Anaplasmataceae; Wolbachieae; Wolbachia.
REFERENCE  1 (bases 1 to 785)
AUTHORS    Fiutek,N., Couger,B.M., Roy,S., de la Torre,J.R. and Connor,E.F.
TITLE      Genomic assessment of the contribution of the Wolbachia
            endosymbiont of Eurosta solidaginis to gall-induction
JOURNAL    International Journal Molecular Sciences
REFERENCE  2 (bases 1 to 785)
AUTHORS    Fiutek,N., Couger,B.M., Roy,S., de la Torre,J.R. and Connor,E.F.
TITLE      Direct Submission
JOURNAL    Submitted (10-FEB-2023) Biology, San Francisco State University,
            1600 Holloway Ave, San Francisco, CA 94132, USA
COMMENT    ##Genome-Assembly-Data-START##
            Assembly Date          :: JUN-2019
            Assembly Method        :: FLYE v. 06-2019
            Genome Representation  :: Full
            Expected Final Version :: Yes
            Genome Coverage        :: 100.0x
            Sequencing Technology  :: Illumina HiSeq; PacBio Sequel
            ##Genome-Assembly-Data-END##
FEATURES   Location/Qualifiers

```

```

source      1..785
             /organism="Wolbachia pipientis"
             /mol_type="genomic DNA"
             /submitter_seqid="contig_40278"
             /isolate="wEsol"
             /isolation_source="galls on Solidago altissima"
             /host="Eurosta solidaginis MN-2018-EFC"
             /db_xref="taxon:955"
             /environmental_sample
             /country="USA: Cowling Arboretum, Carleton College,
             Northfield, MN"
             /lat_lon="44.48 N 93.13 W"
             /altitude="280 m"
             /collection_date="2018-11"
             /metagenome_source="insect metagenome"
             /note="metagenomic"
gene        <1..194
             /locus_tag="wEsol_00846"
CDS         <1..194
             /locus_tag="wEsol_00846"
             /codon_start=1
             /transl_table=11
             /product="hypothetical protein"
             /translation="KTSLTNSASPLIITVKLLYLLSPICRLKGKDYLMYRRLIFNFLQ
             YIDTVCLYKTSSTSRFLSK"
gene        complement(558..>785)
             /locus_tag="wEsol_00847"
CDS         complement(558..>785)
             /locus_tag="wEsol_00847"
             /codon_start=1
             /transl_table=11
             /fullproduct="qcoverage 100 , hcoverage 88.2352941176471
             , similarity 100 , identity 100 , evalue 1.19e-47 ,
             alnlength 75 , Bacteria , Proteobacteria , WP_213863100.1
             hypothetical protein [Wolbachia endosymbiont of
             Rhagoletis cerasi]"
             /translation="VADTGLPYDDVMKVADTGIQPFHPRRQRLLLLSSQCPDTGIQES
             LLVSKQTSIESGYNIFDEIIWKTGSQCQALE"
             /product="hypothetical protein"
             /besthit="qcoverage 100 , hcoverage 88.2352941176471 ,
             similarity 100 , identity 100 , evalue 1.19e-47 ,
             alnlength 75 , Bacteria , Proteobacteria , WP_213863100.1
             hypothetical protein [Wolbachia endosymbiont of
             Rhagoletis cerasi]"

```

# ORIGIN

```

1  aaaaaacttc cttgacaaac tccgccagcc cccttatcat aacagtgaag ctgttgtatt
61 tgcttttcgcc aatctgcaga ttaaaaggta aggattactt aatgtatcgg cgtcttatat
121 tcaattttttt gcagtatata gatactgtat gtctttacaa aacttcatct acatctagat
181 ttttatctaa ataagctgaa cgcgcttata aagcgttaca agacatcaaa aaatgccaat
241 actcgacaga gatagtaaaa gactagctaa ctccggggatt ctttgtcttt ttttctgctt
301 agtaaatttc ttaaacaattt gcagcgtagg ttagttgcaa ttaaaagcag ctgaatttcg
361 cttgtcaagc gtttaaaaca taaaaaacgc caataattta aagcggacaa taaccacggg
421 gcttcttttg cctttttttt cgcttggtaa atttcttaat atttatagca acatgaattg
481 ggcaggaagg tgtcattcca gtgctccttt ttttgtcacc cgagccccta tgatgtcatt
541 ccagtgcctc tatgatgtca ttccagtgtc tgacactggg atccagtttt ccatataatc
601 tcatcgaaaa tggtgtaacc actttctatg ctagtttgct tgctcacaag caaactttcc
661 tggatcccgag tgtctgggca ctgggatgac agaagaagga ggcgctgccg tcttgatga
721 aaaggctgga ttccagtgtc agctactttc atgacatcat cataaggtaa accagtgtca
781 gctac

```

//

LOCUS JAQZAU010000071 4625 bp dna linear ENV 17-MAR-2023  
 DEFINITION MAG: Wolbachia pipientis isolate wEsol contig\_40280, whole genome  
 shotgun sequence.  
 ACCESSION JAQZAU010000071 JAQZAU010000000  
 VERSION JAQZAU010000071.1  
 DBLINK BioProject: PRJNA929258  
 BioSample: SAMN33142973  
 KEYWORDS WGS; ENV; Metagenome Assembled Genome; MAG.  
 SOURCE Wolbachia pipientis (insect metagenome)  
 ORGANISM Wolbachia pipientis  
 Bacteria; Pseudomonadota; Alphaproteobacteria; Rickettsiales;  
 Anaplasmataceae; Wolbachieae; Wolbachia.  
 REFERENCE 1 (bases 1 to 4625)  
 AUTHORS Fiutek,N., Couger,B.M., Roy,S., de la Torre,J.R. and Connor,E.F.  
 TITLE Genomic assessment of the contribution of the Wolbachia  
 endosymbiont of Eurosta solidaginis to gall-induction  
 JOURNAL International Journal Molecular Sciences  
 REFERENCE 2 (bases 1 to 4625)  
 AUTHORS Fiutek,N., Couger,B.M., Roy,S., de la Torre,J.R. and Connor,E.F.  
 TITLE Direct Submission  
 JOURNAL Submitted (10-FEB-2023) Biology, San Francisco State University,  
 1600 Holloway Ave, San Francisco, CA 94132, USA  
 COMMENT ##Genome-Assembly-Data-START##  
 Assembly Date :: JUN-2019  
 Assembly Method :: FLYE v. 06-2019  
 Genome Representation :: Full  
 Expected Final Version :: Yes  
 Genome Coverage :: 100.0x  
 Sequencing Technology :: Illumina HiSeq; PacBio Sequel  
 ##Genome-Assembly-Data-END##  
 FEATURES Location/Qualifiers  
 source 1..4625  
 /organism="Wolbachia pipientis"  
 /mol\_type="genomic DNA"  
 /submitter\_seqid="contig\_40280"  
 /isolate="wEsol"  
 /isolation\_source="galls on Solidago altissima"  
 /host="Eurosta solidaginis MN-2018-EFC"  
 /db\_xref="taxon:955"  
 /environmental\_sample  
 /country="USA: Cowling Arboretum, Carleton College,  
 Northfield, MN"  
 /lat\_lon="44.48 N 93.13 W"  
 /altitude="280 m"  
 /collection\_date="2018-11"  
 /metagenome\_source="insect metagenome"  
 /note="metagenomic"  
 gene complement(25..336)  
 /locus\_tag="wEsol\_00848"  
 CDS complement(25..336)  
 /locus\_tag="wEsol\_00848"  
 /codon\_start=1  
 /transl\_table=11  
 /fullproduct="qcoverage 100 , hcoverage 100 , similarity  
 100 , identity 100 , eval 5.39e-73 , alnlength 103 ,  
 Bacteria , Proteobacteria , CDR78814.1 IS5 family  
 transposase OrfB,Transposase DDE domain [Wolbachia  
 endosymbiont of Drosophila simulans wAu]"  
 /cog="COG3293 COG3293 124 Transposase and inactivated  
 derivatives"

```

/pfam="DDE_Tnp_1_2 DDE_Tnp_1"
/product="IS5 family transposase
OrfB,Transposase DDE domain"
/translation="MWADMGYQGRNLKNHIKEEYDIDIEIVKRPPCRFWVHKDTPPEL
LPTREQGFKVQPRRWVVERTFAWVNRNRRLSKEYDLLTTSTENFIYLAMSRVMLKREY
A"
/besthit="qcoverage 100 , hcoverage 100 , similarity 100
, identity 100 , evalue 5.39e-73 , alnlength 103 ,
Bacteria , Proteobacteria , CDR78814.1 IS5 family
transposase OrfB,Transposase DDE domain [Wolbachia
endosymbiont of Drosophila simulans wAu]"
gene complement(476..856)
/locus_tag="wEsol_00849"
CDS complement(476..856)
/locus_tag="wEsol_00849"
/codon_start=1
/transl_table=11
/fullproduct="qcoverage 100 , hcoverage 100 , similarity
100 , identity 100 , evalue 1.16e-87 , alnlength 126 ,
Bacteria , Proteobacteria , AOV87106.1 transposase
[Wolbachia endosymbiont of Drosophila incompta]"
/cog="COG3293 COG3293 124 Transposase and inactivated
derivatives"
/pfam="DUF4096"
/product="transposase"
/translation="MRKKYPTDLSEREWARIKHFVSYKKGGRPPKYSKREILEAIF
YVLRGTGCQWRYLPNDFPLWKTVYEQFRQWKKQGIFEKMNYEITKYSRRKIGRNEQPSA
CIVDSQSVKTTEKGGSKAMMEVVK"
/besthit="qcoverage 100 , hcoverage 100 , similarity 100
, identity 100 , evalue 1.16e-87 , alnlength 126 ,
Bacteria , Proteobacteria , AOV87106.1 transposase
[Wolbachia endosymbiont of Drosophila incompta]"
gene complement(974..1315)
/locus_tag="wEsol_00850"
CDS complement(974..1315)
/locus_tag="wEsol_00850"
/codon_start=1
/transl_table=11
/fullproduct="qcoverage 100 , hcoverage 100 , similarity
100 , identity 100 , evalue 1.53e-79 , alnlength 113 ,
Bacteria , Proteobacteria , AAS13810.1 transposase, IS5
family, OrfB [Wolbachia endosymbiont of Drosophila
melanogaster]"
/cog="COG3293 COG3293 124 Transposase and inactivated
derivatives"
/pfam="DDE_Tnp_1_2 DDE_Tnp_1"
/product="transposase, IS5 family, OrfB"
/translation="MRTKYTKVKKMWADMGYQGRNLKNHIKEEYDIDIEIVKRPPCRF
WVHKDTPPELLPTREQGFKVQPRRWVVERTFAWVNRNRRLSKEYDLLTTSTENFIYLA
MSRVMLKREYA"
/besthit="qcoverage 100 , hcoverage 100 , similarity 100
, identity 100 , evalue 1.53e-79 , alnlength 113 ,
Bacteria , Proteobacteria , AAS13810.1 transposase, IS5
family, OrfB [Wolbachia endosymbiont of Drosophila
melanogaster]"
gene complement(1426..1806)
/locus_tag="wEsol_00851"
CDS complement(1426..1806)
/locus_tag="wEsol_00851"
/codon_start=1

```

```

/transl_table=11
/fullproduct="qcoverage 100 , hcoverage 100 , similarity
100 , identity 100 , evalue 1.16e-87 , alnlength 126 ,
Bacteria , Proteobacteria , AOV87106.1 transposase
[Wolbachia endosymbiont of Drosophila incompta]"
/cog="COG3293 COG3293 124 Transposase and inactivated
derivatives"
/pfam="DUF4096"
/product="transposase"
/translation="MRKKYPTDLSEREWARIEKHFRVSYKKGGRPPKYSKREILEAIF
YVLRGTCQWRYLPNDFPLWKTVYEQFRQWKKQGIFEKMNYEITKYSRRKIGRNEQPSA
CIVDSQSVKTTEKGGSKAMMEVKK"
/besthit="qcoverage 100 , hcoverage 100 , similarity 100
, identity 100 , evalue 1.16e-87 , alnlength 126 ,
Bacteria , Proteobacteria , AOV87106.1 transposase
[Wolbachia endosymbiont of Drosophila incompta]"
gene complement(1893..2234)
/locus_tag="wEsol_00852"
CDS complement(1893..2234)
/locus_tag="wEsol_00852"
/codon_start=1
/transl_table=11
/fullproduct="qcoverage 100 , hcoverage 100 , similarity
100 , identity 100 , evalue 1.53e-79 , alnlength 113 ,
Bacteria , Proteobacteria , AAS13810.1 transposase, IS5
family, OrfB [Wolbachia endosymbiont of Drosophila
melanogaster]"
/cog="COG3293 COG3293 124 Transposase and inactivated
derivatives"
/pfam="DDE_Tnp_1_2 DDE_Tnp_1"
/product="transposase, IS5 family, OrfB"
/translation="MRTKYTKVKMWADMGYQGRNLKNHIKEEYDIDIEIVKRPPCRF
WVHKDTPPELLPTREQGFKVQPRRWVVERTFAWVNRNRRLSKEYDLLTTSTENFIYLA
MSRVMLKREYA"
/besthit="qcoverage 100 , hcoverage 100 , similarity 100
, identity 100 , evalue 1.53e-79 , alnlength 113 ,
Bacteria , Proteobacteria , AAS13810.1 transposase, IS5
family, OrfB [Wolbachia endosymbiont of Drosophila
melanogaster]"
gene complement(2345..2725)
/locus_tag="wEsol_00853"
CDS complement(2345..2725)
/locus_tag="wEsol_00853"
/codon_start=1
/transl_table=11
/fullproduct="qcoverage 100 , hcoverage 100 , similarity
100 , identity 100 , evalue 1.16e-87 , alnlength 126 ,
Bacteria , Proteobacteria , AOV87106.1 transposase
[Wolbachia endosymbiont of Drosophila incompta]"
/cog="COG3293 COG3293 124 Transposase and inactivated
derivatives"
/pfam="DUF4096"
/product="transposase"
/translation="MRKKYPTDLSEREWARIEKHFRVSYKKGGRPPKYSKREILEAIF
YVLRGTCQWRYLPNDFPLWKTVYEQFRQWKKQGIFEKMNYEITKYSRRKIGRNEQPSA
CIVDSQSVKTTEKGGSKAMMEVKK"
/besthit="qcoverage 100 , hcoverage 100 , similarity 100
, identity 100 , evalue 1.16e-87 , alnlength 126 ,
Bacteria , Proteobacteria , AOV87106.1 transposase
[Wolbachia endosymbiont of Drosophila incompta]"

```

```

gene      complement(2812..3153)
          /locus_tag="wEsol_00854"
CDS       complement(2812..3153)
          /locus_tag="wEsol_00854"
          /codon_start=1
          /transl_table=11
          /fullproduct="qcoverage 100 , hcoverage 100 , similarity
100 , identity 100 , evalue 1.53e-79 , alnlength 113 ,
Bacteria , Proteobacteria , AAS13810.1 transposase, IS5
family, OrfB [Wolbachia endosymbiont of Drosophila
melanogaster]"
          /cog="COG3293 COG3293 124 Transposase and inactivated
derivatives"
          /pfam="DDE_Tnp_1_2 DDE_Tnp_1"
          /product="transposase, IS5 family, OrfB"
          /translation="MRTKYTKVKKMWADMGYQGRNLKNHIKEEYDIDIEIVKRPPCRF
WVHKDTPPELLPTREQGFKVQPRRWVVERTFAWVNRNRRLSKEYDLLTTSTENFIYLA
MSRVMLKREYA"
          /besthit="qcoverage 100 , hcoverage 100 , similarity 100
, identity 100 , evalue 1.53e-79 , alnlength 113 ,
Bacteria , Proteobacteria , AAS13810.1 transposase, IS5
family, OrfB [Wolbachia endosymbiont of Drosophila
melanogaster]"
gene      complement(3264..3644)
          /locus_tag="wEsol_00855"
CDS       complement(3264..3644)
          /locus_tag="wEsol_00855"
          /codon_start=1
          /transl_table=11
          /fullproduct="qcoverage 100 , hcoverage 100 , similarity
100 , identity 100 , evalue 1.16e-87 , alnlength 126 ,
Bacteria , Proteobacteria , AOV87106.1 transposase
[Wolbachia endosymbiont of Drosophila incompta]"
          /cog="COG3293 COG3293 124 Transposase and inactivated
derivatives"
          /pfam="DUF4096"
          /product="transposase"
          /translation="MRKKYPTDLSEREWARIEKHFRVSYKKGGRPPKYSKREILEAIF
YVLRGTGCQWRYLPNDFPLWKTVYEQFRQWKKQGIFEKMNIEITKYSRRKIGRNEQPSA
CIVDSQSVKTTEKGGSKAMMEVKK"
          /besthit="qcoverage 100 , hcoverage 100 , similarity 100
, identity 100 , evalue 1.16e-87 , alnlength 126 ,
Bacteria , Proteobacteria , AOV87106.1 transposase
[Wolbachia endosymbiont of Drosophila incompta]"
gene      complement(3716..4027)
          /locus_tag="wEsol_00856"
CDS       complement(3716..4027)
          /locus_tag="wEsol_00856"
          /codon_start=1
          /transl_table=11
          /fullproduct="qcoverage 100 , hcoverage 100 , similarity
100 , identity 100 , evalue 1.60e-74 , alnlength 103 ,
Bacteria , Proteobacteria , WP_155968470.1 transposase
[Wolbachia pipientis]"
          /cog="COG3335 COG3335 132 Transposase and inactivated
derivatives"
          /pfam="DDE_3 DDE_1"
          /product="transposase"
          /translation="MTFKGGCDKEVFNTWLEKMLLPKLPHGTTIVMDNATFHKTPKTK
ELIDNARCRLLYLPTYSPDLNPIEHCWNTIKSRLRPLMHKYTDLQLLVGNTIMEIYHS

```

```

F"
/besthit="qcoverage 100 , hcoverage 100 , similarity 100
, identity 100 , evalue 1.60e-74 , alnlength 103 ,
Bacteria , Proteobacteria , WP_155968470.1 transposase
[Wolbachia pipientis]"
gene complement(4227..4574)
/locus_tag="wEsol_00857"
CDS complement(4227..4574)
/locus_tag="wEsol_00857"
/codon_start=1
/transl_table=11
/fullproduct="qcoverage 100 , hcoverage 100 , similarity
100 , identity 100 , evalue 2.74e-74 , alnlength 115 ,
Bacteria;Eukaryota , Proteobacteria;Arthropoda ,
WP_155968342.1 MULTISPECIES: IS630 transposase-related
protein [Wolbachia]"
/cog="COG3415 COG3415 138 Transposase and inactivated
derivatives"
/pfam="HTH_Tnp_IS630 HTH_Tnp_1 HTH_23 HTH_28 HTH_29 HTH_7
CENP-B_N Pfam-B_14738 HTH_8 HTH_17 HTH_24 Pfam-B_2106"
/product="IS630
transposase-related protein"
/translation="MAYSVDLRERAVSMIEKGKSKVEVAELLEIGIATLYRWLRKKA
GESLRPSKNGSFIRKIDPKILEEYVKKNPDHTLAEMKQNLGFGINSIWYRLKQLRITL
KKSYSISRQSR"
/besthit="qcoverage 100 , hcoverage 100 , similarity 100
, identity 100 , evalue 2.74e-74 , alnlength 115 ,
Bacteria;Eukaryota , Proteobacteria;Arthropoda ,
WP_155968342.1 MULTISPECIES: IS630 transposase-related
protein [Wolbachia]"

```

# ORIGIN

```

1 gaggttgtcc ggaaactagt aaattcaagc atattccctc tttaacataa ccctactcat
61 agctaggtat atgaaattct cagtggatgt tgtgagtaaa tcatactcct tcgatagcct
121 tctattccta ttaacccaag caaaagtcct ttctacaacc catcttcttg gctgtacttt
181 aaacccttgt tctcttgttg gtagtagctc aggtggcgta tctttgtgca cccaaaatct
241 acatggaggc cttttaacaa tttcaatatc tatgtcatat tcttccttta tgtgattcct
301 taaatttctt ccttggtatc ccatgtcagc ccacattttt taacttttagt atattttggt
361 ctcatattgt ttaatgctat ttaataacca tctctatcat tttcgtttagc agcgcctacg
421 taacaaccta gtataaaacc ctgagtgtct gtaattatat gcctttttct accctttact
481 tttttacttc catcatagcc tttgatcccc ctttttctgt agtctttaca gattgactat
541 ctactataca ggcaactcggc tgctcattcc ttcctatttt tcttctacta tattttgtaa
601 tttcataatt cattttctca aaaattccct gcttcttcca ttgcctgaac tgctcataca
661 cagtcttcca tagcggaaaa tcatttggtg aataaccgcca ttgacaccct gtacgcaata
721 catagaaaat tgcttctaata atttctcttt tgctatactt tggcggcctt cctcctttct
781 tgtatgatac tctgaagtgt ttttctatcc ttgccattc cttttcgctt agatctgttg
841 gatacttttt tctcatcttt acccgcactt aaaatttcag atattatagc cttttactta
901 tttccggaca acctcttata gccttttact tatttccgga cacctcttag aggttgtccg
961 gaaactagta aattcaagca tattccctct ttaacataac cctactcata gctagggtata
1021 tgaaattctc agtggatgtt gtgagtaaat catactcctt cgatagcctt ctattcctat
1081 taacccaagc aaaagtcctt tctacaaccc atcttcttgg ctgtacttta aacccttggt
1141 ctcttgttgg tagtagctca ggtggcgat ctttgtgcac ccaaaatcta catggaggcc
1201 ttttaacaat ttcaatatct atgtcatatt cttcctttat gtgattcttt aaatttcttc
1261 cttggtatcc catgtcagcc cacatttttt taacttttagt atattttggt ctcatattgt
1321 ttaatgctat ttaataacca tctctatcat tttcgtttagc agcgcctacg taacaaccta
1381 gtataaaacc ctgagtgtct gtaattatat gcctttttct accctttact tttttacttc
1441 catcatagcc tttgatcccc ctttttctgt agtctttaca gattgactat ctactataca
1501 ggcaactcggc tgctcattcc ttcctatttt tcttctacta tattttgtaa tttcataatt
1561 cattttctca aaaattccct gcttcttcca ttgcctgaac tgctcataca cagtcttcca
1621 tagcggaaaa tcatttggtg aataaccgcca ttgacaccct gtacgcaata catagaaaat
1681 tgcttctaata atttctcttt tgctatactt tggcggcctt cctcctttct tgtatgatac

```

```

1741 tctgaagtgt ttttctattc ttgcccattc cctttcgctt agatctgttg gatacttttt
1801 tctcatcttt acccgtactt aaaatttcag atattatagc cttttactta tttccggaca
1861 acctcttaga ggttgtccgg aaactagtaa attcaagcat attccctctt taacataacc
1921 ctactcatag ctaggatatat gaaattctca gtggatgttg tgagtaaata atactccttc
1981 gatagccttc tattcctatt aacccaagca aaagtccttt ctacaacca tcttcttgge
2041 tgtactttta acccttggtc tcttggttgg agtagctcag gtggcgatc tttgtgcacc
2101 caaaatctac atggaggcct ttaacaatt tcaatatcta tgtcatattc ttcctttatg
2161 tgattcttta aatttcttcc ttggtatccc atgtcagccc acattttttt aacttttagt
2221 tattttgttc tcatattggt taatgctatt ttaataccat ctctatcatt ttcgttagca
2281 ggcctacgtt aacaacctag tataaaaccc tgagtgtctg taattatatg cctttttcta
2341 ccctttactt ttttacttcc atcatagcct ttgatccccc cttttctgta gtctttacag
2401 attgactatc tactatacag gcactcggct gctcattcct tcctattttt cttctactat
2461 attttgtaat ttcataattc attttctcaa aaattccctg cttcttccat tgctgaact
2521 gtcatacac agtcttccat agcggaaaat catttggtta ataccgccat tgacaccctg
2581 tacgcaatac atagaaaatt gcttctaata tttctctttt gctatacttt ggcgcccttc
2641 ctctttctct gtatgatact ctgaagtgtt tttctattct tgcccattcc ctttcgctta
2701 gatctgttgg atactttttt ctcactttta ccccgtaata aaatttcaga tattatagcc
2761 ttttacttat ttccggacaa cctcttagag gttgtccgga aactagtaaa ttcaagcata
2821 ttccctcttt aacataaccc tactcatagc taggtatatg aaattctcag tggatgttgt
2881 gagtaaatca tactccttcg atagccttct attcctatta acccaagcaa agtcctttc
2941 tacaacccat cttcttggtc gtactttaaa cccttggtct cttgttggtg gtagctcagg
3001 tggcgatctt ttgtgcaccc aaaatctaca tggaggcctt ttaacaattt caatatctat
3061 gtcataattc tcctttatgt gattctttta atttcttctt tggatatcca tgtcagccca
3121 cattttttta acttttagtat attttggtct catattgttt aatgctattt taataccatc
3181 tctatcattt tcgttagcag cgcctacgta acaacctagt ataaaaccct gagtgcctgt
3241 aattatatgc ctttttctac cttttacttt tttacttcca tcatagcctt tgatccccc
3301 ttttctgtag tctttacaga ttgactatct actatacagg cactcggctg ctcattcctt
3361 cctatttttt ttctactata ttttgtaatt tcataattca ttttctcaaa aattccctgc
3421 ttcttccatt gcctgaactg ctcatacaca gtcttccata gcggaaaatc atttggtaaa
3481 taccgccatt gacaccctgt acgcaataca tagaaaattg cttctaatat ttctcttttg
3541 ctatactttg gcgcccttcc tcctttcttg tatgatactc tgaagtgttt ttctattctt
3601 gccatttccc tttcgcttag atctgttgga tacttttttt tcatctttac cccgtactaa
3661 aatttcagat attatagcct tttacttatt tccggacaac ctctatagat attttctaaa
3721 atgaatgata aatttccatt atgggtattac caaccaaag ttgtaagtct gtatatttat
3781 gcattaaagg tctgaggcgg cttttgatgg tattccaaca atgctctata ggggttcaaat
3841 ctggtgaata tggttgtaga tagagcaaac ggcacttagc attatctatt aactcctttg
3901 ttttgaggat tttatggaat gtggcattgt ccataactat tgtagtacca tgtggcaatt
3961 taggtaataa catcttctct aacctgtat tgaataacct tttgtcacac ccaccttga
4021 aagtcattgg tgcaataaat ctctttccaa tccacccgcc tattatactg attctctctc
4081 gttttcttcc tgggaatatc gcataaattt tctttcctat tggagcacgt ccatactctc
4141 ggtataacct attatcaact cctgcttcat ctatatataa gatgctggaa tgggtctattt
4201 ttgagatttt atcggtaaat cgctgcctat cttcttgatt gcgctcttga tatagtgtaa
4261 ctttttttta aagtaattct tagctgtttc agcctatacc aaattgaatt tattccaat
4321 ccaagatttt gtttcatctc tgccagcgta tgatctggat tctttttaac atattcttcg
4381 agtatttttg ggtctatttt tcgaataaag ctgccgtttt tcgatggcct taggctttca
4441 ccagcggtt tctttcttaa ccagcggtac agagttgcta ttcctatctc caaaagctct
4501 gccacctcaa cctttgactt ccctttttct atcatcgata ctgccctttc ccttaaattc
4561 acactatacg ccattataac tcaaataget tattatacct ttatcattta ctttggaag
4621 tacta

```

```

//
LOCUS      JAQZAU010000072      1031 bp      dna      linear      ENV 17-MAR-2023
DEFINITION MAG: Wolbachia pipientis isolate wEsol contig_40541, whole genome
            shotgun sequence.
ACCESSION  JAQZAU010000072 JAQZAU010000000
VERSION    JAQZAU010000072.1
DBLINK     BioProject: PRJNA929258
            BioSample: SAMN33142973
KEYWORDS   WGS; ENV; Metagenome Assembled Genome; MAG.
SOURCE     Wolbachia pipientis (insect metagenome)
ORGANISM   Wolbachia pipientis

```

```

Bacteria; Pseudomonadota; Alphaproteobacteria; Rickettsiales;
Anaplasmataceae; Wolbachieae; Wolbachia.
REFERENCE 1 (bases 1 to 1031)
AUTHORS Fiutek,N., Couger,B.M., Roy,S., de la Torre,J.R. and Connor,E.F.
TITLE Genomic assessment of the contribution of the Wolbachia
endosymbiont of Eurosta solidaginis to gall-induction
JOURNAL International Journal Molecular Sciences
REFERENCE 2 (bases 1 to 1031)
AUTHORS Fiutek,N., Couger,B.M., Roy,S., de la Torre,J.R. and Connor,E.F.
TITLE Direct Submission
JOURNAL Submitted (10-FEB-2023) Biology, San Francisco State University,
1600 Holloway Ave, San Francisco, CA 94132, USA
COMMENT ##Genome-Assembly-Data-START##
Assembly Date :: JUN-2019
Assembly Method :: FLYE v. 06-2019
Genome Representation :: Full
Expected Final Version :: Yes
Genome Coverage :: 100.0x
Sequencing Technology :: Illumina HiSeq; PacBio Sequel
##Genome-Assembly-Data-END##
FEATURES
source Location/Qualifiers
1..1031
/organism="Wolbachia pipientis"
/mol_type="genomic DNA"
/submitter_seqid="contig_40541"
/isolate="wEsol"
/isolation_source="galls on Solidago altissima"
/host="Eurosta solidaginis MN-2018-EFC"
/db_xref="taxon:955"
/environmental_sample
/country="USA: Cowling Arboretum, Carleton College,
Northfield, MN"
/lat_lon="44.48 N 93.13 W"
/altitude="280 m"
/collection_date="2018-11"
/metagenome_source="insect metagenome"
/note="metagenomic"
gene complement(57..440)
/locus_tag="wEsol_00858"
CDS complement(57..440)
/locus_tag="wEsol_00858"
/codon_start=1
/transl_table=11
/pfam="Pfam-B_12755"
/fullproduct="qcoverage 100 , hcoverage 100 , similarity
100 , identity 100 , evalue 3.72e-80 , alnlength 127 ,
Bacteria , Proteobacteria , EAL58176.1 hypothetical
protein WwAna0405 [Wolbachia endosymbiont of Drosophila
ananassae]"
/translation="MELSLPTSEKQSTLVALCQRRDDITQMRTQEKCRLEAPENDHIK
ESCQKTIGFFNSQIDELNNTIQKIIDESRELQQRQKILKTVPGKVISRLSVFNARAWL
LKQKRSSKSCWRIQKKVEKLLVIEE"
/product="hypothetical protein"
/besthit="qcoverage 100 , hcoverage 100 , similarity 100
, identity 100 , evalue 3.72e-80 , alnlength 127 ,
Bacteria , Proteobacteria , EAL58176.1 hypothetical
protein WwAna0405 [Wolbachia endosymbiont of Drosophila
ananassae]"
gene complement(558..764)
/locus_tag="wEsol_00859"

```

```

CDS      complement(558..764)
          /locus_tag="wEsol_00859"
          /codon_start=1
          /transl_table=11
          /pfam="DEDD_Tnp_IS110"
          /fullproduct="qcoverage 100 , hcoverage 100 , similarity
100 , identity 100 , evaluate 1.19e-42 , alnlength 68 ,
Bacteria , Proteobacteria , EAL58175.1 hypothetical
protein WwAna0404 [Wolbachia endosymbiont of Drosophila
ananassae]"
          /translation="MVTSYQNFIGIDIGKFKNVIAVHTQKSVVEFDNNASGWQQLFKK
FSDILPNSLVTLENTGNWFIAFSY"
          /product="hypothetical protein"
          /besthit="qcoverage 100 , hcoverage 100 , similarity 100
, identity 100 , evaluate 1.19e-42 , alnlength 68 ,
Bacteria , Proteobacteria , EAL58175.1 hypothetical
protein WwAna0404 [Wolbachia endosymbiont of Drosophila
ananassae]"
gene      complement(766..>1031)
          /locus_tag="wEsol_00860"
CDS      complement(766..>1031)
          /locus_tag="wEsol_00860"
          /codon_start=1
          /transl_table=11
          /product="hypothetical protein"
          /translation="TVRGGVTISSSSRVLAAKRYRGGCKLKICYKRNKRELLTIGIA
GVCDRRGVDNRLYQGYPsirLNSCMGHMYAPVYNLKSINyRGY"

```

#### ORIGIN

```

1  gtgcagattt gagcagccat tgcagccggt agtacgaaca ttgcttctac cgctgttat
61  tcttcgataa ccaatagctt ttccactttc ttttggatgc gccagcaaga cttgctactt
121 cttttctggt taagtagcca agctctggca ttaaacacag aaagtcttga gataactttt
181 ccaggaactg ttttaaggat tttttgacgt tgttgtaact cacggctttc atcaataatt
241 ttttgtatag tattattgag ttcattctatt tgactattaa agaatccgat agttttttga
301 caacttttctt ttatatgggtc gttttcaggt gcttccagtc tacatTTTTTc ctgagttctc
361 atttgcgtaa tgtcatcacg acgttgacaa agtgcaacca aggttgattg tttttcagaa
421 gtggggagag agagttccat gacgcatatt gagcaagagc ctttgcattc gatttatcgg
481 actttgctaa agttccgtgt gacaagatga agcttttttac tttacgggta ttagctcgat
541 gtacagcgat attcttgtca ataagaaaat gcgataaacc aatttcctgt attttctaaa
601 gttactaaag aattaggtaa gatattctgaa aacttttttaa acaattgttg ccaaccagaa
661 gcattattat caaattcgac aacactcttc tgtgtgtgaa ccgcaataac attttttaaat
721 tttccgatgt caataccaat aaaatTTTtga taagatgtaa ccatattaat aacctcgata
781 gtttattgat ttaagattgt aaacgggtgc atacatatgt cccatgcaac tattcaaacg
841 tatcgaggga tagccttgat ataaacggtt gtcaacgccg cgtcggtcgc acacgcccg
901 tattcctata gtgagtagtt ccctcttgtt tcttttataa catattttta acttacagcc
961 gccgcggtat ctcttagccg ctaacacgta gcgggatgac gagcttatcg tcacgccgcc
1021 acgaaccgtc a

```

//

```

LOCUS      JAQZAU010000073          513 bp    dna        linear    ENV 17-MAR-2023
DEFINITION  MAG: Wolbachia pipientis isolate wEsol contig_40849, whole genome
            shotgun sequence.
ACCESSION   JAQZAU010000073  JAQZAU010000000
VERSION     JAQZAU010000073.1
DBLINK      BioProject: PRJNA929258
            BioSample: SAMN33142973
KEYWORDS    WGS; ENV; Metagenome Assembled Genome; MAG.
SOURCE      Wolbachia pipientis (insect metagenome)
ORGANISM    Wolbachia pipientis
            Bacteria; Pseudomonadota; Alphaproteobacteria; Rickettsiales;
            Anaplasmataceae; Wolbachieae; Wolbachia.
REFERENCE   1  (bases 1 to 513)

```

AUTHORS Fiutek,N., Couger,B.M., Roy,S., de la Torre,J.R. and Connor,E.F.  
 TITLE Genomic assessment of the contribution of the Wolbachia  
 endosymbiont of Eurosta solidaginis to gall-induction  
 JOURNAL International Journal Molecular Sciences  
 REFERENCE 2 (bases 1 to 513)  
 AUTHORS Fiutek,N., Couger,B.M., Roy,S., de la Torre,J.R. and Connor,E.F.  
 TITLE Direct Submission  
 JOURNAL Submitted (10-FEB-2023) Biology, San Francisco State University,  
 1600 Holloway Ave, San Francisco, CA 94132, USA  
 COMMENT ##Genome-Assembly-Data-START##  
 Assembly Date :: JUN-2019  
 Assembly Method :: FLYE v. 06-2019  
 Genome Representation :: Full  
 Expected Final Version :: Yes  
 Genome Coverage :: 100.0x  
 Sequencing Technology :: Illumina HiSeq; PacBio Sequel  
 ##Genome-Assembly-Data-END##  
 FEATURES Location/Qualifiers  
 source 1..513  
 /organism="Wolbachia pipientis"  
 /mol\_type="genomic DNA"  
 /submitter\_seqid="contig\_40849"  
 /isolate="wEsol"  
 /isolation\_source="galls on Solidago altissima"  
 /host="Eurosta solidaginis MN-2018-EFC"  
 /db\_xref="taxon:955"  
 /environmental\_sample  
 /country="USA: Cowling Arboretum, Carleton College,  
 Northfield, MN"  
 /lat\_lon="44.48 N 93.13 W"  
 /altitude="280 m"  
 /collection\_date="2018-11"  
 /metagenome\_source="insect metagenome"  
 /note="metagenomic"  
 gene 134..298  
 /locus\_tag="wEsol\_00861"  
 CDS 134..298  
 /locus\_tag="wEsol\_00861"  
 /codon\_start=1  
 /transl\_table=11  
 /product="hypothetical protein"  
 /translation="MSQKVVNRTTGLVDYKELETNILSSIREGRPLTGRDGALTPFIK  
 KLLEVSLEGE"  
 /besthit="qcoverage 100 , hcoverage 66.66666666666667 ,  
 similarity 100 , identity 100 , evaluate 5.15e-29 ,  
 alnlength 54 , Eukaryota , Arthropoda , GFQ64109.1  
 mutator family transposase [Trichonephila clavata]"  
 gene 291..>513  
 /locus\_tag="wEsol\_00862"  
 CDS 291..>513  
 /locus\_tag="wEsol\_00862"  
 /codon\_start=1  
 /transl\_table=11  
 /product="hypothetical protein"  
 /pfam="Transposase\_mut"  
 /translation="MNNRRNGRNAKTLRTSAGSFELLTPRDREGSFEPQIVKKRQTNL  
 HPELETKILSTFASGMGYRDIVSHVEEIID"  
 /cog="COG3328 COG3328 379 Transposase and inactivated  
 derivatives"  
 /besthit="qcoverage 98.6486486486486 , hcoverage

27.8625954198473 , similarity 100 , identity 100 , eval  
6.67e-42 , alnlength 73 , Eukaryota , Arthropoda ,  
CAD7421462.1 unnamed protein product, partial [Timema  
poppensis]"

ORIGIN

```
1 gcagatgctg tgaatactat agcagctatc acagcaactg tgccataaac agcttctttc
61 ttgggagtgt taaataaact gtgtcaaacc gaaaaaaaagt aataaattga gataaaaaaa
121 tggaggtttg acaatgagtc agaaagtagt aaacagaact accggtttgg tagattataa
181 agaattagaa acaaatatcc tgtcgtctat acgagaagga agaccgttga caggaagaga
241 tggagcatta acaccgttta taaaaaagtt gctggaggta agcctggaag gtgaataatc
301 gaagaaatgg gaggaatgca aagactttac gtacaagcgc agggtcattt gagcttttga
361 cgccaagaga tagggaagga agtttcgaac caaaaaatag caaaaaaagg caaacaact
421 tacatccaga gcttgaaacg aagattttga gcacatttgc cagtgggatg ggctatagag
481 atatagtgtc acatgttgag gaaatttatg atc
```

//

LOCUS JAQZAU010000074 2202 bp dna linear ENV 17-MAR-2023

DEFINITION MAG: Wolbachia pipientis isolate wEsol contig\_41869, whole genome  
shotgun sequence.

ACCESSION JAQZAU010000074 JAQZAU010000000

VERSION JAQZAU010000074.1

DBLINK BioProject: PRJNA929258

BioSample: SAMN33142973

KEYWORDS WGS; ENV; Metagenome Assembled Genome; MAG.

SOURCE Wolbachia pipientis (insect metagenome)

ORGANISM Wolbachia pipientis

Bacteria; Pseudomonadota; Alphaproteobacteria; Rickettsiales;  
Anaplasmataceae; Wolbachieae; Wolbachia.

REFERENCE 1 (bases 1 to 2202)

AUTHORS Fiutek,N., Couger,B.M., Roy,S., de la Torre,J.R. and Connor,E.F.

TITLE Genomic assessment of the contribution of the Wolbachia  
endosymbiont of Eurosta solidaginis to gall-induction

JOURNAL International Journal Molecular Sciences

REFERENCE 2 (bases 1 to 2202)

AUTHORS Fiutek,N., Couger,B.M., Roy,S., de la Torre,J.R. and Connor,E.F.

TITLE Direct Submission

JOURNAL Submitted (10-FEB-2023) Biology, San Francisco State University,  
1600 Holloway Ave, San Francisco, CA 94132, USA

COMMENT ##Genome-Assembly-Data-START##

Assembly Date :: JUN-2019

Assembly Method :: FLYE v. 06-2019

Genome Representation :: Full

Expected Final Version :: Yes

Genome Coverage :: 100.0x

Sequencing Technology :: Illumina HiSeq; PacBio Sequel

##Genome-Assembly-Data-END##

FEATURES Location/Qualifiers

source 1..2202

/organism="Wolbachia pipientis"

/mol\_type="genomic DNA"

/submitter\_seqid="contig\_41869"

/isolate="wEsol"

/isolation\_source="galls on Solidago altissima"

/host="Eurosta solidaginis MN-2018-EFC"

/db\_xref="taxon:955"

/environmental\_sample

/country="USA: Cowling Arboretum, Carleton College,  
Northfield, MN"

/lat\_lon="44.48 N 93.13 W"

/altitude="280 m"

/collection\_date="2018-11"

```

/metagenome_source="insect metagenome"
/note="metagenomic"
gene <1..735
/locus_tag="wEsol_00863"
CDS <1..735
/locus_tag="wEsol_00863"
/codon_start=1
/transl_table=11
/fullproduct="qcoverage 100 , hcoverage 84.1379310344828
, similarity 100 , identity 100 , evaluate 6.28e-142 ,
alnlength 244 , Bacteria , Proteobacteria ,
WP_015589224.1 MULTISPECIES: protease modulator HflC
[unclassified Wolbachia]"
/cog="HflC COG0330 291 Membrane protease subunits,
stomatin/prohibitin homologs"
/pfam="Band_7"
/product="protease modulator
HflC"
/translation="ESGLYFKLPFINSVEFLDKRVLDLSPDKTPREVITADQKRIIVD
AYAKYKITNPITFYQAVRNESGLVRRLYPVIEAHIRENIGRFSLLNEKRSEVMQL
IQRGVYSEAEKFGIEIIDVRIKRADLPEENSSAIFRRMQTEREKEAKEIRAEGEQAGQ
EVRSKADKLRKREIISSAVKESYEIRGRGYAEATRIYNEAFKVDEEFFNFYRSMSAYSK
SFAENNTKFVLSPNNNFLDILNKGWK"
/besthit="qcoverage 100 , hcoverage 84.1379310344828 ,
similarity 100 , identity 100 , evaluate 6.28e-142 ,
alnlength 244 , Bacteria , Proteobacteria ,
WP_015589224.1 MULTISPECIES: protease modulator HflC
[unclassified Wolbachia]"
gene 739..>2202
/locus_tag="wEsol_00864"
CDS 739..>2202
/locus_tag="wEsol_00864"
/codon_start=1
/transl_table=11
/fullproduct="qcoverage 100 , hcoverage 98.1891348088531
, similarity 100 , identity 100 , evaluate 0.0 , alnlength
488 , Bacteria , Proteobacteria , WP_010962868.1
MULTISPECIES: DegQ family serine endoprotease
[Wolbachia]"
/cog="DegQ COG0265 347 Trypsin-like serine proteases,
typically periplasmic, contain C-terminal PDZ domain"
/pfam="Trypsin_2 Pfam-B_3070 Trypsin Pfam-B_13657 PDZ
PDZ_2 PDZ PDZ_2 GRASP55_65"
/tigr="TIGR02037 degP_htrA_DO 434 peptidase Do"
/product="DegQ family serine
endoprotease"
/translation="MKS KAFILSIFAYFLIAFSSYANMFDWNAKKVVDASTTACNCNQ
GLADLVEELIPAVVNISSEQIIKQENNSRTRVPSMPGNNFFDDFREFFEHFDQFFMDR
GPSVNKEVVLLGSGFIIDKGGTIVTNYHVIKNAKDITVTMNDNTYFKAEVLGYDARTD
LAVLKINSDDKDLSSVAFGSDSKARVGD TVMAIGNPFGGLGGSVSTGIISARSRDISIGT
MNEFIQTDAAINRGNSSGGPLFDLNGKVIGINTAIYSPSESGGNVGIGFAIPSNLAMSI
IDTLKSGKKIKHGWLG VQVPITKEFAESLGLKDIKALVASIVKDS PAEKGGIKVG D
ILLEFDGKKIDRMTQLPQMVS RAGPEKKVQVKLLRKSKEVNIKV VIGESTNDGQDNNQ
EENKSTSDYVTGLTVSNLPKESKESKNNVPTKGVIVT NVDSNSNATLRGIKKGDII IQ
LDGTDIENTNDFQKQVDS AVKKNGKDSIMLLIYRNGNQ"
/besthit="qcoverage 100 , hcoverage 98.1891348088531 ,
similarity 100 , identity 100 , evaluate 0.0 , alnlength
488 , Bacteria , Proteobacteria , WP_010962868.1
MULTISPECIES: DegQ family serine endoprotease
[Wolbachia]"

```

# ORIGIN

```

1 gaaagtggct tatatTTTTaa gttgccattc ataaatagt tagagtttct tgataaaaga
61 gtttttagatt taagtcctga caaaactcca agagaagtga taactgcaga tcaaaaacgt
121 attatagtag atgcgtatgc aaaatataaa ataacgaatc ctattacttt ttaccaggct
181 gtgaggaatg aatcaggtct ggtagaaga ttatatccgg ttatagaagc tcacataaga
241 gaaaatatag gcagattttc gttgattagc ttgttgaatg aaaaaagatc agagggttatg
301 caattgattc agcgtggagt ttattctgaa gctgaaaaat ttggcataga aataatagat
361 gtaagaatta agagagcaga tttaccagaa gaaaatagtt ctgcaatatt tcgccgtatg
421 caaactgaaa gggaaaaaga agcaaaagaa attagagcag aaggagagca agctgggcag
481 gaagttagat caaaagctga taaattaaaa agggaaatta tctccagtgc agtaaaagaa
541 tcgtacgaaa taaggggccg tggttatgct gaagcaacta gaatttataa tgaggcattt
601 aaggttgatg aagagtttct taacttttat cgctctatga gcgcttacag taaatcattt
661 gccgaaaata atactaaatt tgtactttca ccaaacaata actttttaga tattttaaat
721 aaaggatgga aataatttat gaaaagtaag gcatttattt tatctatatt tgcataattt
781 ctaattgcgt tttcttcgta tgctaatatg ttgattgga atgcaaaaaa ggctcgttgat
841 gctagcacta ctgcatgcaa ctgtaatcaa ggacttgccg atttagtgga agaactcatt
901 cctgcggttg taaatatattc aagcgaacaa atcatcaaac aagaaaataa cagcagaact
961 agagttccat ctatgccagg aaataatttt tttgatgatt ttagagagtt ttttgagcat
1021 tttgatcagt tttttatgga taggggccct agtggttaaca aagaggtggg gttgcttggg
1081 tctgggttta ttatagataa aggtggaact atagtaacca attatcacgt tattaanaac
1141 gccaaagata tcacagttac tatgaacgat aatacttatt tcaaagcaga agttttaggc
1201 tatgatgcaa gaactgatct tgctgtgctt aagattaatt ctgataaaga tctttcttct
1261 gttgcatttg gtgattctga taaagcaagg gttggtgata cggttatggc aataggtaac
1321 ccatttggtt tgggtggctc tgtaagcaca ggaattatat ctgcaaggct cagggacatt
1381 agtattggca ctatgaatga atttattcaa actgatgctg caattaatag gggtaactct
1441 ggaggaccgt tatttgattt aaatggaaaa gttataggta ttaatactgc tatctattct
1501 ccatctgagt ctggcgcaaa tgtgggtata ggttttgcca taccatctaa tttagctatg
1561 tcaattattg acacattaaa aagtggcaaa aaaataaaac atgggtggct tgggtgtgcaa
1621 gttcagccta taacgaaaga atttgctgag tccttgggtt taaaagatat aaaaggcgca
1681 ttggttgcaa gtatagtaaa ggatagtcct gcagaaaaag gtgggattaa agtaggtgat
1741 atattattag aatttgacgg taaaaaaatc gatagaatga cacaattacc tcaaatgggt
1801 tcaagagctg gacctgagaa aaaagtgcaa gttaagttac ttagaaagag caaagagggt
1861 aatattaaag ttgtgatcgg agaatctaca aatgatggcc aagataacaa tcaagaagaa
1921 aataaatcaa catctgatta tgtaaccggg ttaactgttt caaatctgcc aaaagaatca
1981 aaagaaagta aaaataatgt acctacaaaa ggtgtgatag ttaccaatgt agatagtaac
2041 agtaatgcca cgttgcgtgg tattaaaaaa ggagacatta ttatccaatt agatggaacc
2101 gatatagaaa atactaatga ttttcaaaaa caagttgatt cagcagtaaa gaaaaacggt
2161 aaagattcaa taatgttgct catttaccgc aatggaaatc aa

```

//

```

LOCUS      JAQZAU010000075          43507 bp    dna        linear    ENV 17-MAR-2023
DEFINITION MAG: Wolbachia pipientis isolate wEsol contig_41988, whole genome
            shotgun sequence.
ACCESSION  JAQZAU010000075  JAQZAU010000000
VERSION    JAQZAU010000075.1
DBLINK     BioProject: PRJNA929258
            BioSample: SAMN33142973
KEYWORDS   WGS; ENV; Metagenome Assembled Genome; MAG.
SOURCE     Wolbachia pipientis (insect metagenome)
ORGANISM   Wolbachia pipientis
            Bacteria; Pseudomonadota; Alphaproteobacteria; Rickettsiales;
            Anaplasmataceae; Wolbachieae; Wolbachia.
REFERENCE  1  (bases 1 to 43507)
AUTHORS    Fiutek,N., Couger,B.M., Roy,S., de la Torre,J.R. and Connor,E.F.
TITLE      Genomic assessment of the contribution of the Wolbachia
            endosymbiont of Eurosta solidaginis to gall-induction
JOURNAL    International Journal Molecular Sciences
REFERENCE  2  (bases 1 to 43507)
AUTHORS    Fiutek,N., Couger,B.M., Roy,S., de la Torre,J.R. and Connor,E.F.
TITLE      Direct Submission
JOURNAL    Submitted (10-FEB-2023) Biology, San Francisco State University,

```

```

1600 Holloway Ave, San Francisco, CA 94132, USA
COMMENT ##Genome-Assembly-Data-START##
Assembly Date      :: JUN-2019
Assembly Method    :: FLYE v. 06-2019
Genome Representation :: Full
Expected Final Version :: Yes
Genome Coverage    :: 100.0x
Sequencing Technology :: Illumina HiSeq; PacBio Sequel
##Genome-Assembly-Data-END##
FEATURES
    source      1..43507
                /organism="Wolbachia pipientis"
                /mol_type="genomic DNA"
                /submitter_seqid="contig_41988"
                /isolate="wEsol"
                /isolation_source="galls on Solidago altissima"
                /host="Eurosta solidaginis MN-2018-EFC"
                /db_xref="taxon:955"
                /environmental_sample
                /country="USA: Cowling Arboretum, Carleton College,
                Northfield, MN"
                /lat_lon="44.48 N 93.13 W"
                /altitude="280 m"
                /collection_date="2018-11"
                /metagenome_source="insect metagenome"
                /note="metagenomic"
    gene        complement(<1..1621)
                /locus_tag="wEsol_00865"
    CDS         complement(<1..1621)
                /locus_tag="wEsol_00865"
                /codon_start=1
                /transl_table=11
                /pfam="Resolvase Recombinase Zn_ribbon_recom
                Pfam-B_11632"
                /fullproduct="qcoverage 100 , hcoverage 99.4475138121547
                , similarity 100 , identity 100 , eval 0.0 , alnlength
                540 , Bacteria , Proteobacteria , WP_141457029.1
                recombinafamily protein [Wolbachia endosymbiont of
                Carposina sasakii]"
                /translation="MTTVSLYARVSSRQQAQENTIESQIVELERRISSDGHELLDEHR
                FVDNGYSGSNLERPGLESLRDRVAEGKIDKIYIHSPDRLSRKFSYQMILLEEFKKAGS
                EIVFLNHKFDDNPDSHLFLQIQGAIAEYERAKIMERNRRGKLHAAKAGCISVMGRAPY
                GYRYIAKHVGEQSAQFEVDEEEANIVRKIFSRVGQERASIGEVVHELNKIPVITRTGK
                RYWKRSTIWNMLKNPAYIGQAAYGKTKTCSKPQVKKSCKGTCGKLGSGRFNSDKENWT
                YIPVPKIINENLFDSVQTQLAENRQARVRQRRETYLLQGLMVCQRCQYTYCGTNHVV
                KKSTYYYYRCSGTNSSKFNGNKICDNKSIRTDILDGVIWEEVKSILKEPDRIANEYQR
                RLSENKKPLHNQTREKQESKLRLSIKKFIDSYAKGFISQEEFEPRIITTMKQHLKEIEE
                EKERTLDQKKLQQELSLVTDLSLKNFSSSVESKLDLVDWQTKQNIIRMLIHQIEINHH
                LYIVFRIKNLANFDQSSSHNRIMQCCTSSQYCW"
                /product="recombinase family protein"
                /besthit="qcoverage 100 , hcoverage 99.4475138121547 ,
                similarity 100 , identity 100 , eval 0.0 , alnlength
                540 , Bacteria , Proteobacteria , WP_141457029.1
                recombinafamily protein [Wolbachia endosymbiont of
                Carposina sasakii]"
    gene        1963..3159
                /locus_tag="wEsol_00866"
    CDS         1963..3159
                /locus_tag="wEsol_00866"
                /codon_start=1

```

```

/transl_table=11
/fullproduct="qcoverage 100 , hcoverage 100 , similarity
99.0 , identity 97.2 , evalue 7.60e-285 , alnlength 398 ,
Bacteria , Proteobacteria , WP_077188243.1 hypothetical
protein [Wolbachia pipientis]"
/translation="MNVHPSYEFWESDLEVPVNLLDRFQDSKIRQSWLDSLSGKQLS
IIFQHCFKSHLNGQLFQDGDYDDRSTQQKRKILASYSDSLNNYLLISHFDRTKLEATV
SEVARFALTEKLMRSYLIKNNTKYDKRSLLFLLFHINCEFLKSVYHFDKVQKKGFISF
ALQKSPRQINTSFKEFMSQEAVEQILKDDQLQGFFHHQDRIYMFVRRGSDMDLLNS
NKVVHGHKPEWMILDFSLDGTQVNLCAKNTNKAVEIANISVSGYFDCECTFVNIQDKN
FPLQVHKFLQACIDGSDSDICIFELNFKSDYFKNSNTYLTLSVKPYDPIAPELHILKP
SIGNILQSIQSAKVMFQNKKVTFSEFKISGEVYYSEHPLNKKEREDLKKHMEQSYGLKI
LSRANC"
/product="hypothetical protein"
/besthit="qcoverage 100 , hcoverage 100 , similarity 99.0
, identity 97.2 , evalue 7.60e-285 , alnlength 398 ,
Bacteria , Proteobacteria , WP_077188243.1 hypothetical
protein [Wolbachia pipientis]"
gene 3125..4234
/locus_tag="wEsol_00867"
CDS 3125..4234
/locus_tag="wEsol_00867"
/codon_start=1
/transl_table=11
/fullproduct="qcoverage 100 , hcoverage 100 , similarity
98.4 , identity 94.9 , evalue 1.45e-256 , alnlength 369 ,
Bacteria , Proteobacteria , WP_015587754.1 hypothetical
protein [Wolbachia endosymbiont of Drosophila simulans]"
/translation="MVLKFFHEQIADLLSSNSSWINPSQNHKAARYLFDLGIWMQEQE
RYYIVCSREEDHLDWPNVIDPNCSEIFIDPDFDEACDDAICENCSRHILPNTYQKQR
FHLLSIYLNTEKIIDWFETKLND SRLMWEKVEKGVYICNQGRIVNLIILDFCTDAIF
LAIDKLRVHPTVLITLKKDIPNLLLSLYIVPMVELFCQLKTLTEIFQEAAKRGVPEVV
ENTSLQVLPASYISLKRVEPIVPTKLLELQVVKGMVYVNSIEVINKKAASCLNIFRIL
FRQFLHDCEKELPPEKHTLLNINQLEKLLGLSLEADLEQQIRKPLNKMQRRTIKSILAE
KLGLSIERDDVIQTLGWQRLSHGYRINPFTLTIKK"
/product="hypothetical protein"
/besthit="qcoverage 100 , hcoverage 100 , similarity 98.4
, identity 94.9 , evalue 1.45e-256 , alnlength 369 ,
Bacteria , Proteobacteria , WP_015587754.1 hypothetical
protein [Wolbachia endosymbiont of Drosophila simulans]"
gene complement(4247..6259)
/locus_tag="wEsol_00868"
CDS complement(4247..6259)
/locus_tag="wEsol_00868"
/codon_start=1
/transl_table=11
/pfam="Pfam-B_2902 Toprim_4 Toprim_3 Toprim_2 AAA_25"
/fullproduct="qcoverage 99.4029850746269 , hcoverage
99.2548435171386 , similarity 98.3 , identity 96.8 ,
evalue 0.0 , alnlength 666 , Bacteria , Proteobacteria ,
WP_226079478.1 AAA family ATPase [Wolbachia endosymbiont
of Tribolium confusum]"
/translation="MKTQLLQNIRSCLFHLLPRGTFRGDKFYVGDVQGNKGKSTVIEL
TGERAGLWKDFATGEGGDIIDLWATVHGKNAKTEFPEVMLSISEWLGIKEKNTRDLE
QYLTCSWNYYDESNQVIVIVYRYDPPLEKKQFKPFQVKKQRFKEPEIRPLYNIPGILK
SDKVILVEGEKCAEVLEKGITATTAMFGANATPDKTDWTPKLGKHIIIPDNDEPGD
KYAKNAEKKLLELGVTSLATLKIIPNPKPSWNAADCVLERINIEEFIEKNSRKIIIPK
PLDIFSWSVERFVGVPVKQRFVLEGLFPLGVTSILAAMGDTGKGMLLLLDLALKVAGSI
DQVCGFGQLVTEHGSVVVFSAEDDTNEIHRRLERLDPKCERLKYKDRFLFIVPLPNIGG
SFTILKNVRGKVVEISPEFESVVKQLSKVKDLKLIIFDPLASFIHADLNADPAVG DYL

```

```

MCLLSDLACNTGASIIITAHHMRKLKGEKPISTVEQARDAIRGTSALVNGVRCSFAPFWP
VEDMTKPMIFRSIGKIPRQNALFYGAVVKANGLADRTIRTYLRNEETGLLEDITEQLK
AQNISDKDLKIYLIDSIARAASSGHPFTHTGSAIHQQRHRLPETFHSMGRDRLERIV
QDLLQAKQIVKGMANGSKEDKWLVDVKTGPFARGVGKFIHGAEKNYF"
/product="AAA family ATPase"
/besthit="qcoverage 99.4029850746269 , hcoverage
99.2548435171386 , similarity 98.3 , identity 96.8 ,
evaluate 0.0 , alnlength 666 , Bacteria , Proteobacteria ,
WP_226079478.1 AAA family ATPase [Wolbachia endosymbiont
of Tribolium confusum]"
gene complement(6275..7495)
/locus_tag="wEsol_00869"
CDS complement(6275..7495)
/locus_tag="wEsol_00869"
/codon_start=1
/transl_table=11
/pfam="AAA_25 AAA_14"
/fullproduct="qcoverage 100.492610837438 , hcoverage 100
, similarity 99.0 , identity 97.3 , evaluate 5.12e-283 ,
alnlength 408 , Bacteria , Proteobacteria , MBR9982993.1
AAA family ATPase [Wolbachia endosymbiont of Homalodisca
vitripennis]"
/translation="MKYDEEKLWSAVVTRGIQDAVGKNPKLREEAIHWLNSKSFETVC
ELANLNFKRIKNMYGNFMSKKQKELKMLLIDNIKECVSYLLPNGEFYREKTYIGDLNG
NTITVKIVGKEAGDWRNFTEGTGGDIIDLWILIKGDIYSARKWLNKKSSEEKKEEE
KIFSVKQYLSQSPIPEDIIAPRIILTPGGLLVIGGTPKVGKSYFLLSLLAHLAAGVSF
LKMK SARPLKIVYLQNE MEYNYIRERIQQIITNQRLPNLAEENLIVTTKMRLTLNDEG
IERIKEIIGEKFKTIDLIVLDSIDYENIFPGLQSRIEKLRSIINPMAGIIITRHRKV
STATLAKSPFQALIGANALRSFYTSGMVMFQPNKRANVLQVVYELRNGKSIPAKFISR
VNGRWQNSKVIATA"
/product="AAA family ATPase"
/besthit="qcoverage 100.492610837438 , hcoverage 100 ,
similarity 99.0 , identity 97.3 , evaluate 5.12e-283 ,
alnlength 408 , Bacteria , Proteobacteria , MBR9982993.1
AAA family ATPase [Wolbachia endosymbiont of Homalodisca
vitripennis]"
gene complement(7492..7980)
/locus_tag="wEsol_00870"
CDS complement(7492..7980)
/locus_tag="wEsol_00870"
/codon_start=1
/transl_table=11
/pfam="Pfam-B_8806"
/fullproduct="qcoverage 100 , hcoverage 100 , similarity
100 , identity 100 , evaluate 3.52e-113 , alnlength 162 ,
Bacteria , Proteobacteria , WP_015587751.1 MULTISPECIES:
hypothetical protein [unclassified Wolbachia]"
/translation="MLQNLLTDFNTVKPQSR LIPKGTIVKV KMTIKPGGYEHWFTKSP
TTGSIYLNTEFTVIEGPYAKHKIYQIIGIKSSKAEDTWGEMGRSMLRSILESARDIHP
HDNSENAILARKLNSVAELNGLEFTVKVG VITDEYGEKNKIASVVTPEYRKNYEIDRV
PF"
/product="hypothetical protein"
/besthit="qcoverage 100 , hcoverage 100 , similarity 100
, identity 100 , evaluate 3.52e-113 , alnlength 162 ,
Bacteria , Proteobacteria , WP_015587751.1 MULTISPECIES:
hypothetical protein [unclassified Wolbachia]"
gene complement(8004..8801)
/locus_tag="wEsol_00871"
CDS complement(8004..8801)
/locus_tag="wEsol_00871"

```

```

/codon_start=1
/transl_table=11
/pfam="AAA_24"
/fullproduct="qcoverage 100 , hcoverage 100 , similarity
100 , identity 100 , evalue 9.55e-196 , alnlength 265 ,
Bacteria , Proteobacteria , WP_077188248.1 ATP-binding
protein [Wolbachia pipientis]"
/translation="MVLKILNNNERLQTISTVKMVIFGPYIGIGKTSLLKTVDEPTLCL
DFEAGLLAVQDWQGDSISLRTWNEARDIACLIGGPNPALKYDQAYSQRHHEHVSQK
DLFPEFSKYRCIFVDSITVASRLCLLWAKMQPEAFSERSGKQDMRAAYGLLAQEMMAW
LNQFQHIRDKDIIIVGTGLQYLDDEFNRPIWLPQCEGKTASEIPGIVDEVISMVGIKR
DDGTEKRSFVCHTLNPWGYPKDRSGRLSMVEEPHLGKLLTKIKSKF"
/product="ATP-binding protein"
/besthit="qcoverage 100 , hcoverage 100 , similarity 100
, identity 100 , evalue 9.55e-196 , alnlength 265 ,
Bacteria , Proteobacteria , WP_077188248.1 ATP-binding
protein [Wolbachia pipientis]"
gene complement(8853..9344)
/locus_tag="wEsol_00872"
CDS complement(8853..9344)
/locus_tag="wEsol_00872"
/codon_start=1
/transl_table=11
/fullproduct="qcoverage 100 , hcoverage 100 , similarity
98.8 , identity 98.8 , evalue 3.65e-111 , alnlength 163 ,
Bacteria , Proteobacteria , WP_065094960.1 MULTISPECIES:
sigma-70 family RNA polymerase sigma factor [unclassified
Wolbachia]"
/cog="RpoE COG1595 182 DNA-directed RNA polymerase
specialized sigma subunit, sigma24 homolog"
/pfam="Sigma70_r2 HTH_11"
/tigr="TIGR02937 sigma70-ECF 165 RNA polymerase sigma
factor, sigma-70 family"
/product="sigma-70 family
RNA polymerase sigma factor"
/translation="MKLQNYHIVIKNVKYQAYRLKLAKCFINEAHEDLEQELFCEIWP
CLDQYDEDKSSFNTFVARLTENKAINLLKKQRCARDINNYISIDVTELLEGEITKRI
DVDYMISVLPKEWQNICQLKFFNLHEVAKMNNVSRRTTLNIIKKIRAKLSPIYYEGK
KKN"
/besthit="qcoverage 100 , hcoverage 100 , similarity 98.8
, identity 98.8 , evalue 3.65e-111 , alnlength 163 ,
Bacteria , Proteobacteria , WP_065094960.1 MULTISPECIES:
sigma-70 family RNA polymerase sigma factor [unclassified
Wolbachia]"
gene 9392..9577
/locus_tag="wEsol_00873"
CDS 9392..9577
/locus_tag="wEsol_00873"
/codon_start=1
/transl_table=11
/pfam="Spore_permease"
/fullproduct="qcoverage 100 , hcoverage 100 , similarity
96.7 , identity 96.7 , evalue 1.76e-32 , alnlength 61 ,
Bacteria , Proteobacteria , BAH22279.1 hypothetical
protein [Wolbachia endosymbiont of Cadra cautella]"
/translation="MLLCRTGAKINNTDAIFNLLIFCYFFLRRIILMQFKIIQFRFLEP
ILNGFQRMGSSGFLKLY"
/product="hypothetical protein"
/besthit="qcoverage 100 , hcoverage 100 , similarity 96.7
, identity 96.7 , evalue 1.76e-32 , alnlength 61 ,

```

gene Bacteria , Proteobacteria , BAH22279.1 hypothetical protein [Wolbachia endosymbiont of Cadra cautella]"  
9977..10144  
/locus\_tag="wEsol\_00874"

CDS 9977..10144  
/locus\_tag="wEsol\_00874"  
/codon\_start=1  
/transl\_table=11  
/fullproduct="qcoverage 100 , hcoverage 100 , similarity 100 , identity 100 , evalue 7.96e-31 , alnlength 55 , Bacteria , Proteobacteria , RLT60284.1 hypothetical protein WANA34\_0217 [Wolbachia endosymbiont of Drosophila ananassae]"  
/translation="MFRRFLNKHLQERVNYKKFSKIEDFLDVIFSNLVYICTRQLKDL VNKLAVKEFSC"  
/product="hypothetical protein"  
/besthit="qcoverage 100 , hcoverage 100 , similarity 100 , identity 100 , evalue 7.96e-31 , alnlength 55 , Bacteria , Proteobacteria , RLT60284.1 hypothetical protein WANA34\_0217 [Wolbachia endosymbiont of Drosophila ananassae]"

gene 10228..10698  
/locus\_tag="wEsol\_00875"

CDS 10228..10698  
/locus\_tag="wEsol\_00875"  
/codon\_start=1  
/transl\_table=11  
/fullproduct="qcoverage 100 , hcoverage 100 , similarity 100 , identity 100 , evalue 7.20e-110 , alnlength 156 , Bacteria , Proteobacteria , WP\_007549851.1 MULTISPECIES: hypothetical protein [unclassified Wolbachia]"  
/translation="MLTLDLGKQTGWITLNDGIVQSGSKSFHVSRFSGGGMQFLNFRN WLNSLKYKFPGIEVVYFEEVRRHLGTDAAHIYGGFLAHL SAWCEESNIPYQGVSVKTI KRFITGKGNASKADVIEAVQKKGFCPTDDNEADSLALMFYVMNFSKDFNTLEIS"  
/product="hypothetical protein"  
/besthit="qcoverage 100 , hcoverage 100 , similarity 100 , identity 100 , evalue 7.20e-110 , alnlength 156 , Bacteria , Proteobacteria , WP\_007549851.1 MULTISPECIES: hypothetical protein [unclassified Wolbachia]"

gene 10702..11313  
/locus\_tag="wEsol\_00876"

CDS 10702..11313  
/locus\_tag="wEsol\_00876"  
/codon\_start=1  
/transl\_table=11  
/fullproduct="qcoverage 87.6847290640394 , hcoverage 100 , similarity 100 , identity 100 , evalue 1.61e-112 , alnlength 178 , Bacteria , Proteobacteria , ACN95513.1 hypothetical protein WRi\_007640 [Wolbachia sp. wRi]"  
/translation="MGPFQNSGFGGPD LGPSLALDIFQMLTTYEIIAEKCLSSAKKG EKKVRITQAEWAREKGFSRQYVCSLVKKGIVELEDGLIDREQANEAVAAIRDPSQPLR RKERGETLSTILLKTRIKNETERGKLLLEAKVKAIEIGKFVSIEEVKTEAFNVARVVRNN LLNIPNRVSALLASLSDTEKIHMLVLT EETNSLQELSNTKFQI"  
/product="hypothetical protein"  
/besthit="qcoverage 87.6847290640394 , hcoverage 100 , similarity 100 , identity 100 , evalue 1.61e-112 , alnlength 178 , Bacteria , Proteobacteria , ACN95513.1 hypothetical protein WRi\_007640 [Wolbachia sp. wRi]"

gene 11333..12796  
/locus\_tag="wEsol\_00877"

CDS 11333..12796  
 /locus\_tag="wEsol\_00877"  
 /codon\_start=1  
 /transl\_table=11  
 /pfam="Ank\_2 Ank\_4 Pfam-B\_1881 Ank\_5 Pfam-B\_10896 Ank  
 Ank\_3 Ank\_5 Ank\_2 Ank\_3 Ank Ank\_4 Pfam-B\_10896 Ank Ank\_3  
 Ank\_5 Pfam-B\_1714 Ank\_2 Ank\_5 Pfam-B\_11730 Ank\_3 Ank  
 Ank\_4 Ank\_2 Ank\_5 Ank\_4 Ank\_4 Ank\_2 Ank\_5 Pfam-B\_1873 Ank  
 Ank\_3"  
 /fullproduct="qcoverage 100 , hcoverage 100 , similarity  
 98.4 , identity 98.2 , evalue 1.80e-296 , alnlength 487 ,  
 Bacteria , Proteobacteria , WP\_044471254.1 MULTISPECIES:  
 ankyrin repeat domain-containing protein [unclassified  
 Wolbachia]"  
 /translation="MADNLSLELIKCLINQPLDVNVRGLNGKTPLHCAIEFDELSMV  
 DLLLTCKKNINPFVEDNEGKTSLDYAKEGKKAIEILQALINNKGSEQDSSLHLAAMIGE  
 VNAVRYLIRKGIDVNVRNALHHTPLHLAAGIGHAEVVKILIREGKAEIDVFDARNQTP  
 MHYAVNNKKLEIVKLLKLKLGADVNSARMGQNSMKLSPVHIAVSNTNYDERDCLDILK  
 CLIREPNAQVNLQDYENKTPLHYAERLKTIEVLLTREDIDPLVKDDSGKTLFDYAENR  
 PEIKKVLMSKYGSEKNSLLHLAAQKGVVDITLKEEIDINILNNKGHSPIYLAAEKGH  
 LHVVKLLLEKGANYTPVLHLAIKSNLELLKTLFKEKSIKLPDEIGRSVPIIYRCIER  
 RDAKVRKYNNVICVSTSVSAVAIAVYIGLTAITISNAIIFATITGIFALIIAIMISEV  
 SKRYIENEFQKKMFMELEECSSSTVNDVEIEPVMSCRCR"  
 /product="ankyrin repeat  
 domain-containing protein"  
 /besthit="qcoverage 100 , hcoverage 100 , similarity 98.4  
 , identity 98.2 , evalue 1.80e-296 , alnlength 487 ,  
 Bacteria , Proteobacteria , WP\_044471254.1 MULTISPECIES:  
 ankyrin repeat domain-containing protein [unclassified  
 Wolbachia]"

gene 12796..14628  
 /locus\_tag="wEsol\_00878"

CDS 12796..14628  
 /locus\_tag="wEsol\_00878"  
 /codon\_start=1  
 /transl\_table=11  
 /fullproduct="qcoverage 100 , hcoverage 100 , similarity  
 99.8 , identity 99.5 , evalue 0.0 , alnlength 610 ,  
 Bacteria , Proteobacteria , WP\_041582652.1 MULTISPECIES:  
 phage terminase large subunit family protein  
 [unclassified Wolbachia]"  
 /cog="COG5525 COG5525 611 Phage terminase, large subunit  
 GpA"  
 /pfam="Terminase\_GpA DUF3268"  
 /product="phage terminase  
 large subunit family protein"  
 /translation="MIYATSFSEGLRPDPQLKVSEWANEYRVLAPTAASEPGKWRT  
 ETPYLKEIMDSLSPSSQAEKVVFMMKGAQIGGTEAGNNWIGYIIDQTPGPMLVVQPTVEM  
 GKRWSKGRFAPLIESTPCLKSKVKDPRSRDSGNTVQSKEFPGGIVVITGANSSVSLRS  
 MPVKYLFLEIDAYPGDSGGEGDPVLLSIARTNTFAHRKIFLVSTPTIHGISRIEKEF  
 EATDKRYFFVPCPHCNYYQVLKWSQIKWENNDSRTAHYVCTECSGKIENHQKTEMLDR  
 GEWRATNQVHNSKVVIGFHLSSLYSPVGWYSWQQAVEDFLHAKESQQLKVWINTTLGE  
 TWVDKGEVPDWKQLFNRRREFFPVGTVPREVVLTAGVDVQKDRLEVEVLAWGKSRESW  
 SIDYRVFEGDTGGGEVWGKLSELLNHHFIGQNGLEYMISMMAVDAGYATQEVYNWVRG  
 HQGAGRVMVKGVNKALVPLSSPSRVDITVGGQKLKRGIKLWPGVSVILKSELFQLLN  
 ILKEEEGKALPGYCHFPYAPYFQQLTAEQLVSKVVKGYTKQEWQKVRERNEVLDCR  
 IYARAASIALGIDRWPEKWNLSLEKPESEKPKPKVRQSKWLNEK"  
 /besthit="qcoverage 100 , hcoverage 100 , similarity 99.8  
 , identity 99.5 , evalue 0.0 , alnlength 610 , Bacteria ,  
 Proteobacteria , WP\_041582652.1 MULTISPECIES: phage

```

terminase large subunit family protein [unclassified
Wolbachia]"
gene      14630..14854
          /locus_tag="wEsol_00879"
CDS       14630..14854
          /locus_tag="wEsol_00879"
          /codon_start=1
          /transl_table=11
          /pfam="gpW"
          /fullproduct="qcoverage 100 , hcoverage 100 , similarity
100 , identity 100 , evalue 7.41e-42 , alnlength 74 ,
Bacteria , Proteobacteria , WP_007549008.1 MULTISPECIES:
hypothetical protein [unclassified Wolbachia]"
          /translation="MYNEEYLIQVEEAIAKKLQSGERVVSIAYGDHVVRVYAEVQINDLL
NLRQRIKAELKVAGMKPKRKIVFSTSKGII"
          /product="hypothetical protein"
          /besthit="qcoverage 100 , hcoverage 100 , similarity 100
, identity 100 , evalue 7.41e-42 , alnlength 74 ,
Bacteria , Proteobacteria , WP_007549008.1 MULTISPECIES:
hypothetical protein [unclassified Wolbachia]"
gene      14854..15912
          /locus_tag="wEsol_00880"
CDS       14854..15912
          /locus_tag="wEsol_00880"
          /codon_start=1
          /transl_table=11
          /pfam="DUF1016"
          /fullproduct="qcoverage 100 , hcoverage 100 , similarity
100 , identity 100 , evalue 3.55e-253 , alnlength 352 ,
Bacteria;Viruses , Proteobacteria;Uroviricota ,
ACN95473.1 phage uncharacterized protein [Wolbachia sp.
wRi]"
          /translation="MIKIVERNFMTKVIAKEYTEFLEQLKEQIATSRYKAALAVNSKL
IVLYHHIGTEILKRQKEHGWGAKIIDQLSRDLRDAFPDMKGFSIQNLKYMRRFAEEYS
ENEIGQQAVDQLPWGHNIVIMYEVKNKEERFWYIKKSCEHGWSRNILSMQIETNLYKR
EGKAITNFRNNLISPQSDLAQQTLKNPYVFDLFLSLGKKAHEREIEKALVAHIERFLL
LGEGFAFLGRQYHLRVGDRDFYLDLVFYHIKLRICYVVIELKAGKFRPEYTGKMNFYLS
AVDDLLRQPGDNQSIGLILYRSKVGVIAYALRDINKPIGLAEYRITENLPENIKTAL
PTIEELEAELSKVSDQEK"
          /product="phage uncharacterized protein"
          /besthit="qcoverage 100 , hcoverage 100 , similarity 100
, identity 100 , evalue 3.55e-253 , alnlength 352 ,
Bacteria;Viruses , Proteobacteria;Uroviricota ,
ACN95473.1 phage uncharacterized protein [Wolbachia sp.
wRi]"
gene      15912..17330
          /locus_tag="wEsol_00881"
CDS       15912..17330
          /locus_tag="wEsol_00881"
          /codon_start=1
          /transl_table=11
          /fullproduct="qcoverage 99.5762711864407 , hcoverage 100
, similarity 99.1 , identity 96.4 , evalue 0.0 ,
alnlength 470 , Bacteria , Proteobacteria ,
WP_127464160.1 phage portal protein [Wolbachia
endosymbiont of Bemisia tabaci]"
          /cog="COG5511 COG5511 492 Bacteriophage capsid protein"
          /pfam="Phage_portal_2"
          /tigr="TIGR01539 portal_lambda 457 phage portal protein,
lambda family"

```

```

/product="phage portal protein"
/translation="MLLKSFQKLFNPKPIKSSAWDAAGSGRRFFHFQPELGSINNLLS
QNLETLRSRSDMRKPNPYAANIIDTIVSNSIGTGIKPQSKARDGEFRKKVQELWLRW
TDEADSNQVSDFYGLQALVCRSMIEGGEFCFIRLRTRKLEDVRSVPLQLQVLESEHLEN
KTNKTLANGNVIRNGIEFNRLGQREAYYLFREHPGEGSFGEVSRVPANDVLHIYRPLR
PGQIRGEFWLSNILLKLYELDQYDDAELVRKKTAAMFAGFITRLDPEANIMGEGESNE
QGVALSGLEPGTMQLLDPGEDIKFSEPSDVGGSEAFMRQQLRAIAIGTGITYEQLTG
DLTGVDNYSSIRAGLIEFRRCAMLQHNIIVFQFCRPVWSRWLELAVLCGELSIDEKVV
KAAKEEVKWI PQGFDWVDPLKDQQAQQMAVRNGFKSRAEVVSEMGYDVEEIDQEIAED
QKRANSFGLCFDSDVNHKREGR"
/besthit="qcoverage 99.5762711864407 , hcoverage 100 ,
similarity 99.1 , identity 96.4 , evaluate 0.0 , alnlength
470 , Bacteria , Proteobacteria , WP_127464160.1 phage
portal protein [Wolbachia endosymbiont of Bemisia
tabaci]"
gene 17330..18064
/locus_tag="wEsol_00882"
CDS 17330..18064
/locus_tag="wEsol_00882"
/codon_start=1
/transl_table=11
/product="hypothetical protein"
/pfam="CLP_protease Peptidase_S49"
/tigr="TIGR00706 SppA_dom 208 signal peptide peptidase
SppA, 36K type"
/translation="MWINKPVMVERRSFELLSLYNSKQPIFKNLKHFHINPKGIAIIR
IYGVLTCKTEAFDHILDMTSYENIHEEIESALGDKSIETILLDIDSPGGEVNGVFDLA
DFIYESRTKKRIIAIANDDAYSAAAYAIASSAEKVVFVSRTSGVGSIGVIAASHIDQSRFD
ERQGIKYTTIFAGSRKNDLNPHEPMTSESLESLQKEVGRLYEMFLQLIARNRGLSMEK
IRSTEAAIFWRESSRDRSCRWSYNIF"
/cog="SppA COG0616 317 Periplasmic serine proteases (ClpP
class)"
/besthit="qcoverage 95.0819672131148 , hcoverage
67.6384839650146 , similarity 97.8 , identity 95.7 ,
evaluate 1.42e-148 , alnlength 232 , Bacteria ,
Proteobacteria , ONI57885.1 hypothetical protein
N499_0447 [Wolbachia pipientis wVitA]"
gene 18099..18350
/locus_tag="wEsol_00883"
CDS 18099..18350
/locus_tag="wEsol_00883"
/codon_start=1
/transl_table=11
/product="hypothetical protein"
/translation="MTTIEESYENCRRILEIIRLCNVSKMPEKIGEFIEQGVSV EQA
REVLMELLAERTKKTEILSAIPRNSQEDLMTQVAKSRCI"
/besthit="qcoverage 100 , hcoverage 24.9249249249249 ,
similarity 97.6 , identity 94.0 , evaluate 3.17e-43 ,
alnlength 83 , Bacteria , Proteobacteria , WP_187297063.1
S49 family peptidase [Wolbachia pipientis]"
gene 18491..18862
/locus_tag="wEsol_00884"
CDS 18491..18862
/locus_tag="wEsol_00884"
/codon_start=1
/transl_table=11
/pfam="HDPD"
/fullproduct="qcoverage 99.1869918699187 , hcoverage
99.1869918699187 , similarity 99.2 , identity 98.4 ,
evaluate 1.48e-75 , alnlength 122 , Bacteria ,

```

```

Proteobacteria , WP_214303461.1 head decoration protein
[Wolbachia endosymbiont of Erebia cassioides]"
/translation="MISITEGNNLGDLLKYEVSNNLYSRDQITVAKGQNLKLGAVVAKK
TEDGFIRVLNPAGTDGTQTAIGAIVSDVNATENAKAVIITRGAILADHAVVWPANITE
EQKAEAIKQLEARGIIRKGA"
/product="head decoration protein"
/besthit="qcoverage 99.1869918699187 , hcoverage
99.1869918699187 , similarity 99.2 , identity 98.4 ,
evaluate 1.48e-75 , alnlength 122 , Bacteria ,
Proteobacteria , WP_214303461.1 head decoration protein
[Wolbachia endosymbiont of Erebia cassioides]"
gene 18901..19905
/locus_tag="wEsol_00885"
CDS 18901..19905
/locus_tag="wEsol_00885"
/codon_start=1
/transl_table=11
/pfam="Phage_cap_E"
/fullproduct="qcoverage 100 , hcoverage 100 , similarity
99.4 , identity 97.9 , evaluate 1.17e-242 , alnlength 334 ,
Bacteria , Proteobacteria , WP_052265017.1 major capsid
protein [Wolbachia endosymbiont of Operophtera brumata]"
/translation="MQNPFTNTAFSMTALTNAINILPINYGRVENLNLFPNRSVFRH
ITIEEHNGVLSLLPTQVPGAPATVGKRGRKRVRTFTIPHIPHDDVVLPEEVQGIRAFG
SESELKALADVVDHLQLMRNKHAITLEHLRMGALKGIILDADGSELLNLYNEFEITP
KVVNFALGTATTDVKKCLEVLRHIEDNLSGEYMTGIHALVSPEFFDALTSKAVKEA
YERWQEGAALRNDMRSGFTFCGITFEEYRGQATDPEGTVRRFIERDTGHCFFVGTAST
FTTYFAPADFNETVNTLGQPLYAKQEPFRFRDRTDLHTQSNPLPMCHRPVLAIVTT
"
/product="major capsid protein"
/besthit="qcoverage 100 , hcoverage 100 , similarity 99.4
, identity 97.9 , evaluate 1.17e-242 , alnlength 334 ,
Bacteria , Proteobacteria , WP_052265017.1 major capsid
protein [Wolbachia endosymbiont of Operophtera brumata]"
gene 20015..20320
/locus_tag="wEsol_00886"
CDS 20015..20320
/locus_tag="wEsol_00886"
/codon_start=1
/transl_table=11
/pfam="Pfam-B_106"
/fullproduct="qcoverage 100 , hcoverage 100 , similarity
100 , identity 94.1 , evaluate 1.91e-63 , alnlength 101 ,
Bacteria , Proteobacteria , WP_019236397.1 hypothetical
protein [Wolbachia pipientis]"
/translation="MQKNIKRLFKDCFAHLGELALYESKNKAYMVQVLKQEPDKLYEI
GEGQFVGETLVLEVSADFVLQPIVGDIFVIGDRKYKVYSPPLQDNSGMVWKIRASGV"
/product="hypothetical protein"
/besthit="qcoverage 100 , hcoverage 100 , similarity 100
, identity 94.1 , evaluate 1.91e-63 , alnlength 101 ,
Bacteria , Proteobacteria , WP_019236397.1 hypothetical
protein [Wolbachia pipientis]"
gene 20321..20827
/locus_tag="wEsol_00887"
CDS 20321..20827
/locus_tag="wEsol_00887"
/codon_start=1
/transl_table=11
/pfam="Pfam-B_14565 Pfam-B_12992 Minor_tail_Z"
/fullproduct="qcoverage 96.4285714285714 , hcoverage

```

98.1818181818182 , similarity 98.1 , identity 94.4 ,  
 evalue 7.26e-97 , alnlength 162 , Bacteria ,  
 Proteobacteria , WP\_141456764.1 phage tail protein  
 [Wolbachia endosymbiont of Carposina sasakii]"  
 /translation="MRINTGSIIQSIDAERKKVEKATVSALNKTAIWLKSKAAKEISE  
 EKRIKLSLIRKRLRIFKAKTSRLEVLIRANLYDIKASAIGKIQKTRRGSKVGKHEFIG  
 GFAAVMPKGNSGMFKREGRAALPIKEVKLPLEPEASRIIGNLVNVEVEKVFTKFFERE  
 LSYITGSV"  
 /product="phage tail protein"  
 /besthit="qcoverage 96.4285714285714 , hcoverage  
 98.1818181818182 , similarity 98.1 , identity 94.4 ,  
 evalue 7.26e-97 , alnlength 162 , Bacteria ,  
 Proteobacteria , WP\_141456764.1 phage tail protein  
 [Wolbachia endosymbiont of Carposina sasakii]"

gene 20824..21300  
 /locus\_tag="wEsol\_00888"

CDS 20824..21300  
 /locus\_tag="wEsol\_00888"  
 /codon\_start=1  
 /transl\_table=11  
 /pfam="Pfam-B\_4030"  
 /fullproduct="qcoverage 100 , hcoverage 100 , similarity  
 96.8 , identity 88.6 , evalue 3.40e-100 , alnlength 158 ,  
 Bacteria , Proteobacteria , WP\_047759345.1 hypothetical  
 protein [Wolbachia endosymbiont of Armadillidium  
 vulgare]"  
 /translation="MNFKDLHNAICTTLKKEIPAIQTCEIYPSIRKELVAPAVFVELS  
 GFEEKGHDPGTEELALKARFEARIVIDSTIENAAIIVRSLAAEVAKVVDKNTWNVKNVS  
 PGEFISAEVDEFRPELDAYLVMMVEVWHTIHVGRSIWKEGKFMPhKIEIGEINVRE"  
 /product="hypothetical protein"  
 /besthit="qcoverage 100 , hcoverage 100 , similarity 96.8  
 , identity 88.6 , evalue 3.40e-100 , alnlength 158 ,  
 Bacteria , Proteobacteria , WP\_047759345.1 hypothetical  
 protein [Wolbachia endosymbiont of Armadillidium  
 vulgare]"

gene 21287..21751  
 /locus\_tag="wEsol\_00889"

CDS 21287..21751  
 /locus\_tag="wEsol\_00889"  
 /codon\_start=1  
 /transl\_table=11  
 /fullproduct="qcoverage 100 , hcoverage 100 , similarity  
 98.1 , identity 94.2 , evalue 2.32e-96 , alnlength 154 ,  
 Bacteria , Proteobacteria , WP\_077188260.1 phage  
 baseplate assembly protein V [Wolbachia pipientis]"  
 /cog="gpV COG4540 184 Phage P2 baseplate assembly protein  
 gpV"  
 /pfam="Phage\_base\_V Pfam-B\_2532"  
 /tigr="TIGR01644 phage\_P2\_V 192 phage baseplate assembly  
 protein V"  
 /product="phage baseplate assembly protein  
 V"  
 /translation="MLENNFAIAELQRKLANIVRIGVVKEIDCEKAKVRVKIGEFLLD  
 YLPWITSKAGKDRNWSPPDIDEQVMVFSPLGELSLGVVLGGIYQEKYSAPEDKKEINS  
 VKFQDGTRELLYDKEKHHLEIEVVDKITLKAGESSIEMTKSEIKLKADRINLN"  
 /besthit="qcoverage 100 , hcoverage 100 , similarity 98.1  
 , identity 94.2 , evalue 2.32e-96 , alnlength 154 ,  
 Bacteria , Proteobacteria , WP\_077188260.1 phage  
 baseplate assembly protein V [Wolbachia pipientis]"

gene 21752..22006

CDS

```

/locus_tag="wEsol_00890"
21752..22006
/locus_tag="wEsol_00890"
/codon_start=1
/transl_table=11
/product="hypothetical protein"
/pfam="PAAR_motif DUF4150 PAAR_motif"
/translation="MNKSVVRVGDYCVETPHEFCISGSNNVSVNGKPMCRQGDKFSEG
RALTEGSKTVFANGFGAGRVDIVSCGFKVIKGSENVFAG"
/besthit="qcoverage 58.33333333333333 , hcoverage
58.33333333333333 , similarity 93.9 , identity 91.8 ,
evaluate 2.18e-25 , alnlength 49 , Bacteria ,
Proteobacteria , WP_143688962.1 hypothetical protein
[Wolbachia endosymbiont of Laodelphax striatellus]"

```

gene

CDS

```

22009..22335
/locus_tag="wEsol_00891"
22009..22335
/locus_tag="wEsol_00891"
/codon_start=1
/transl_table=11
/fullproduct="qcoverage 98.1481481481482 , hcoverage
95.4954954954955 , similarity 98.1 , identity 93.4 ,
evaluate 2.03e-62 , alnlength 106 , Bacteria ,
Proteobacteria , WP_208571808.1 GPW/gp25 family protein
[Wolbachia pipientis]"
/cog="COG3628 COG3628 116 Phage baseplate assembly
protein W"
/pfam="DUF2634 GPW_gp25"
/product="GPW/gp25 family protein"
/translation="MEGMSDKTGKELEGIEHLKQSIIDILTPINSRIMRRDYGSRLF
ELVDKPISRDLTLEIYAATAEALGKWEKRFKLEKVKITEVKEGKVTLDLGLELYVPSGK
NIRFIV"
/besthit="qcoverage 98.1481481481482 , hcoverage
95.4954954954955 , similarity 98.1 , identity 93.4 ,
evaluate 2.03e-62 , alnlength 106 , Bacteria ,
Proteobacteria , WP_208571808.1 GPW/gp25 family protein
[Wolbachia pipientis]"

```

gene

CDS

```

22338..23132
/locus_tag="wEsol_00892"
22338..23132
/locus_tag="wEsol_00892"
/codon_start=1
/transl_table=11
/fullproduct="qcoverage 100 , hcoverage 99.2481203007519
, similarity 98.5 , identity 95.1 , evaluate 6.43e-169 ,
alnlength 264 , Bacteria , Proteobacteria ,
WP_211908057.1 baseplate J/gp47 family protein [Wolbachia
endosymbiont of Spodoptera picta]"
/cog="COG3948 COG3948 306 Phage-related baseplate
assembly protein"
/pfam="Baseplate_J"
/product="baseplate J/gp47 family protein"
/translation="MQQTNIIERLNFEEILSRMKEELVKCDASFTALVESDPAMKVLE
VAAWRELLLRQRINESVKSNNLLKFAMGEDLDNLAEFYGVERQKEEDDERFRKRIKAKI
VGSSTCGSKEYRYHALSADSRVKDALVESPIPGKVQISILSTQLSTTGIVSEELLKI
VKKQVTRDDIRVLDTLTLVIGCNITEIDIHSRMSISPVISKEEIKKQFIQKFELAKRL
GWSVTRSWIISNLFVDGVENVELIEPKEDVVVLGNECANLRNLKVE"
/besthit="qcoverage 100 , hcoverage 99.2481203007519 ,
similarity 98.5 , identity 95.1 , evaluate 6.43e-169 ,
alnlength 264 , Bacteria , Proteobacteria ,

```

WP\_211908057.1 baseplate J/gp47 family protein [Wolbachia endosymbiont of Spodoptera picta]"

gene 23132..24286  
/locus\_tag="wEsol\_00893"

CDS 23132..24286  
/locus\_tag="wEsol\_00893"  
/codon\_start=1  
/transl\_table=11  
/pfam="Pfam-B\_16372 Tail\_P2\_I"  
/fullproduct="qcoverage 99.73958333333333 , hcoverage 99.2227979274611 , similarity 98.7 , identity 96.9 , evaluate 2.31e-277 , alnlength 383 , Bacteria , Proteobacteria , WP\_211908058.1 phage tail protein [Wolbachia endosymbiont of Spodoptera picta]"  
/translation="MLLPNATKQEQALVDATDYKVDPGCIRGFKFSLKEETLPWLIE EYELGEILRWVKDKRRAIVEGVKFQRLRGTPASLKIALKWANIEDIKIIEEPPGKHFF ELQVGIKEVPNDFFVDVAVELAKLLLPVRSRLMRIFNDYYNAQRFILDESIFGDLSD YSGVKIEKDGPVLSFGRVNFFRSSGPVIRIIENYL RDHYERALSNDIYRLDVAILGET EPHTKNGIYERNHLWYNLKALYPLPQSLLPSIKFAKAQIVLSDSWDLGDINTCFPV SSVEERGKNFVLGSDKLSGQYWNLKHKPILERFSVTHNYKAKNYTDQKVRKYVLAHN VYYKNDLEQKDSIHELENYILVFYPGVLKWHEHRLHRSWKNSQVISLIS"  
/product="phage tail protein"  
/besthit="qcoverage 99.73958333333333 , hcoverage 99.2227979274611 , similarity 98.7 , identity 96.9 , evaluate 2.31e-277 , alnlength 383 , Bacteria , Proteobacteria , WP\_211908058.1 phage tail protein [Wolbachia endosymbiont of Spodoptera picta]"

gene 24454..25182  
/locus\_tag="wEsol\_00894"

CDS 24454..25182  
/locus\_tag="wEsol\_00894"  
/codon\_start=1  
/transl\_table=11  
/pfam="Pfam-B\_10896 Ank\_2 Ank\_4 Ank\_5 Ank Ank\_3 Ank\_4 Ank\_5 Ank Ank\_3 Ank\_4 Ank\_5 Ank Ank\_3 Ank\_2 Ank\_4"  
/fullproduct="qcoverage 95.4545454545455 , hcoverage 97.8813559322034 , similarity 99.6 , identity 99.6 , evaluate 2.78e-125 , alnlength 231 , Bacteria , Proteobacteria , WP\_141456723.1 ankyrin repeat domain-containing protein [Wolbachia endosymbiont of Carposina sasakii]"  
/translation="MKFSEEKRESFSKFFKEVSSNGFKNINKRNEEGETILHQAVEIS DYKTARLLIKKGAEVNARDKNGYTPLHCAVFAKSL ENVKVLLREGAEVNATQYVTGCT PLHSACKIGGAGVEIIKELVKAGAEVNQLNKYGATPMYYIWESEKYRLCDSKESERAS KFLREKGGITKSRELTCYGIERIVEEIIADMLNGSYMP ELKIIIEIEIIRKRDKSLIKEE CENLASKIMSQVNEMIDEVVKRRA"  
/product="ankyrin repeat domain-containing protein"  
/besthit="qcoverage 95.4545454545455 , hcoverage 97.8813559322034 , similarity 99.6 , identity 99.6 , evaluate 2.78e-125 , alnlength 231 , Bacteria , Proteobacteria , WP\_141456723.1 ankyrin repeat domain-containing protein [Wolbachia endosymbiont of Carposina sasakii]"

gene 25221..25673  
/locus\_tag="wEsol\_00895"

CDS 25221..25673  
/locus\_tag="wEsol\_00895"  
/codon\_start=1  
/transl\_table=11

```

/pfam="Ank_4 Pfam-B_10896 Ank_2 Ank Ank_3 EPSP_synthase
Ank_2 Ank_4 Ank_5 Ank Ank_3 Ank_2 Ank_4 Ank_3 Ank_5 Ank"
/fullproduct="qcoverage 102 , hcoverage 100 , similarity
92.2 , identity 89.5 , evalue 3.59e-48 , alnlength 153 ,
Bacteria , Proteobacteria , WP_141456724.1 ankyrin repeat
domain-containing protein [Wolbachia endosymbiont of
Carposina sasakii]"
/translation="MSKKGKEESLLENSYKNIYARDKNGRTALHYAVEVKTVELLVEK
GANVNAKDIEGYTALHLAVTEKRLEIVRELIKSGADVNAEEYGNKCIPLHLACMVGEK
AIVEELVKAGGEIEQADKFGMTAMDYSKEVTEVLKKETDRIEKLFMKG"
/product="ankyrin repeat domain-containing
protein"
/besthit="qcoverage 102 , hcoverage 100 , similarity 92.2
, identity 89.5 , evalue 3.59e-48 , alnlength 153 ,
Bacteria , Proteobacteria , WP_141456724.1 ankyrin repeat
domain-containing protein [Wolbachia endosymbiont of
Carposina sasakii]"
gene 25678..26118
/locus_tag="wEsol_00896"
CDS 25678..26118
/locus_tag="wEsol_00896"
/codon_start=1
/transl_table=11
/pfam="DUF2924"
/fullproduct="qcoverage 100 , hcoverage 100 , similarity
99.3 , identity 97.3 , evalue 2.77e-91 , alnlength 146 ,
Bacteria , Proteobacteria , MBR9984245.1 DUF2924
domain-containing protein [Wolbachia endosymbiont of
Homalodisca vitripennis]"
/translation="MEEEIEKKVMNLERKPLGELRKTWKKVFGEKAPRYSKKYLIPRL
AYRMQEKAYGEMSRKGTKRLEYLADRLEKKGKRISDCLPVEGTELILERGEETHAVMV
TDKGLIYREEFFTSLSAVAGKIMGMSYNGPLLFGLRDQKGRENV"
/product="DUF2924 domain-containing protein"
/besthit="qcoverage 100 , hcoverage 100 , similarity 99.3
, identity 97.3 , evalue 2.77e-91 , alnlength 146 ,
Bacteria , Proteobacteria , MBR9984245.1 DUF2924
domain-containing protein [Wolbachia endosymbiont of
Homalodisca vitripennis]"
gene 26066..27598
/locus_tag="wEsol_00897"
CDS 26066..27598
/locus_tag="wEsol_00897"
/codon_start=1
/transl_table=11
/pfam="Resolvase Recombinase Zn_ribbon_recom Pfam-B_1335
Pfam-B_16452"
/fullproduct="qcoverage 97.2549019607843 , hcoverage 100
, similarity 98.4 , identity 98.0 , evalue 0.0 ,
alnlength 496 , Bacteria , Proteobacteria ,
WP_141456726.1 recombinase family protein [Wolbachia
endosymbiont of Carposina sasakii]"
/translation="MGRSYLVCVIKREGKMKCGIRCGIYTRKSNEDGLEQKFNSLDAQ
RVACEKYIKSKEGWVALAKRYDDGGFSGKNLERPAIKELFEDVKKGEVDCVVVYTLDR
LSRETKDSIEVTSFFRRHRVNFVAVTQIFDNNTPMGKFVQTVLSGAAQLEREMIVERV
KNKIATSKHEGLWMGGTLPFGYDVKDKELINEKEAKIVKHIFARYLELKSMALARE
LNSQGYHTKSDIFKKATVRRIITNPIYMGKIRHYEKEYEGKHEAIIIEEEKWQKAQELI
KNQPYRKAKYEEALLRGIICKKSCNVNMTLTYSKKENKRYRYIICNNHLRGKGCESIN
RTIVAGEVEKEVMKKAQLYEKWGKKAEEWKNLSFGKQKEVVKKLIKGMVKEDGIEM
GSEDKVEFIPIMKKKGKNKCTVIEPEGKTNALLKAVVGAHLWKRQLEEGKYASVGELS
AKINIGTRRIQQILRLNLYLAPKIKEDIVNGRQPKGLKLVELREIPMLWSEQMKKFCKL

```

```

AI"
/product="recombinase family protein"
/besthit="qcoverage 97.2549019607843 , hcoverage 100 ,
similarity 98.4 , identity 98.0 , evaluate 0.0 , alnlength
496 , Bacteria , Proteobacteria , WP_141456726.1
recombinase family protein [Wolbachia endosymbiont of
Carposina sasakii]"
gene 27665..28675
/locus_tag="wEsol_00898"
CDS 27665..28675
/locus_tag="wEsol_00898"
/codon_start=1
/transl_table=11
/fullproduct="qcoverage 100 , hcoverage 100 , similarity
100 , identity 100 , evaluate 6.40e-232 , alnlength 336 ,
Bacteria , Proteobacteria , WP_141456727.1 hypothetical
protein [Wolbachia endosymbiont of Carposina sasakii]"
/translation="MRKLITGKTNEADITYELPFDQDQLTSKDKKELFKLLKRIQEGK
SISEKISKSFHDTRKIPWILIVDIYERRRDVFTLLHYARFCKNKQAENDLLEEAKKHG
LFKEFNRTKIVSDYLGSHGELIRTYSTVKDGVVRVEGFEPWDDKEVMNPNMTSDKEEK
NSLIETIMEGSVAYNISEDIEEVSDKNKENFYGEQQEETAETGTQPCCKINNGEDYER
NEENQGNFANSGRITVVKELNALRIFSSNPCVNDKSFKIADEESSTKAMQRRAILTGAV
GVVLLVSGIVSHIMKPTIGTVGVIAGLACISFALYSTLEPSTKLEKVEELFRSNARE
HS"
/product="hypothetical protein"
/besthit="qcoverage 100 , hcoverage 100 , similarity 100
, identity 100 , evaluate 6.40e-232 , alnlength 336 ,
Bacteria , Proteobacteria , WP_141456727.1 hypothetical
protein [Wolbachia endosymbiont of Carposina sasakii]"
gene complement(28793..29005)
/locus_tag="wEsol_00899"
CDS complement(28793..29005)
/locus_tag="wEsol_00899"
/codon_start=1
/transl_table=11
/pfam="PRiA4_ORF3"
/fullproduct="qcoverage 100 , hcoverage 100 , similarity
100 , identity 100 , evaluate 6.00e-46 , alnlength 70 ,
Bacteria , Proteobacteria , WP_141456728.1 plasmid pRiA4b
ORF-3 family protein [Wolbachia endosymbiont of Carposina
sasakii]"
/translation="MPNEKSVKNSYIYKVFEPDKKMIFLFDYGDNWEFLVECCGIIEA
EAGTRYPKVTKKQGEAPPQYPDYEDE"
/product="plasmid pRiA4b ORF-3 family
protein"
/besthit="qcoverage 100 , hcoverage 100 , similarity 100
, identity 100 , evaluate 6.00e-46 , alnlength 70 ,
Bacteria , Proteobacteria , WP_141456728.1 plasmid pRiA4b
ORF-3 family protein [Wolbachia endosymbiont of Carposina
sasakii]"
gene complement(29390..30472)
/locus_tag="wEsol_00900"
CDS complement(29390..30472)
/locus_tag="wEsol_00900"
/codon_start=1
/transl_table=11
/fullproduct="qcoverage 100 , hcoverage 100 , similarity
99.7 , identity 99.7 , evaluate 1.58e-260 , alnlength 360 ,
Bacteria , Proteobacteria , WP_141456729.1 hypothetical
protein [Wolbachia endosymbiont of Carposina sasakii]"

```

```

/translation="MTEANPIVTLKVKIKEFSFSKLGAGESNKSASHSGETMYFDLPRM
NFVINGKIIDTVLTSVLMEGAKYRKSNLFSYDIYSAEAASKQREIDKDHGRAFVNS
VLKDLEKELAYNALSELWESHENPEIPDYQKTNSYGRDFFERFYNAGREHMHLLLVG
DENKNYRPFVKEVFKEMFKYAEAEVPSAPILEELVTNCNQAGYLAGIFIEYHSALSNY
RLTTQDPDKVMNIDYTDHNNIRVKS DMEIPVIKFDNPGKICGLSTSLEFTLESQDGK
DGVTYKDGKLSLTPKELKNYKEGDRNLLSIIREYFQKFCEKLGFKFEMETQKIEHDL
DDL PKVNSHLQGLRTPISSNDHIIGH"
/product="hypothetical protein"
/besthit="qcoverage 100 , hcoverage 100 , similarity 99.7
, identity 99.7 , evalue 1.58e-260 , alnlength 360 ,
Bacteria , Proteobacteria , WP_141456729.1 hypothetical
protein [Wolbachia endosymbiont of Carposina sasakii]"
gene complement(30670..31125)
/locus_tag="wEsol_00901"
CDS complement(30670..31125)
/locus_tag="wEsol_00901"
/codon_start=1
/transl_table=11
/fullproduct="qcoverage 100 , hcoverage 100 , similarity
100 , identity 100 , evalue 1.53e-104 , alnlength 151 ,
Bacteria , Proteobacteria , WP_141456730.1 Hsp20/alpha
crystallin family protein [Wolbachia endosymbiont of
Carposina sasakii]"
/cog="IbpA COG0071 146 Molecular chaperone (small heat
shock protein)"
/pfam="Pfam-B_13608 CS Pfam-B_3437 HSP20 PIH1"
/product="Hsp20/alpha crystallin family
protein"
/translation="MSNIVHSNKNNNRDNFSVRGLQRAVDDIFDSFFTGWNPELSRRS
NSLLPACDFYETKESYCLSLELPGISKESIDISISGDSLIVKGEKTCDNESKDKQFYH
RERYYGSEFYRSIQLPVNVERDKVSASFSDGVLHVTIPKSEKHIKKIDVK"
/besthit="qcoverage 100 , hcoverage 100 , similarity 100
, identity 100 , evalue 1.53e-104 , alnlength 151 ,
Bacteria , Proteobacteria , WP_141456730.1 Hsp20/alpha
crystallin family protein [Wolbachia endosymbiont of
Carposina sasakii]"
gene 31551..31856
/locus_tag="wEsol_00902"
CDS 31551..31856
/locus_tag="wEsol_00902"
/codon_start=1
/transl_table=11
/product="hypothetical protein"
/pfam="HTH_29 HTH_32 HTH_33"
/translation="MKWITRFKEGGVDAFKIQPGRGVKPKLSYKQQEEIKNVIAEEGA
NLTAKKLKIIIEKMFSIEVSKSTAHLGMLQKLGFSYITPRPVHKNQDKNKQEKFKKKS"
/cog="COG3415 COG3415 138 Transposase and inactivated
derivatives"
/besthit="qcoverage 74.2574257425743 , hcoverage 100 ,
similarity 98.7 , identity 94.7 , evalue 1.56e-39 ,
alnlength 75 , Bacteria , Proteobacteria , WP_151808077.1
MULTISPECIES: winged helix-turn-helix domain-containing
protein [Wolbachia]"
gene 31856..31978
/locus_tag="wEsol_00903"
CDS 31856..31978
/locus_tag="wEsol_00903"
/codon_start=1
/transl_table=11
/product="hypothetical protein"

```

```

/translation="MKLLSRIPKKSYFSSMNRGLAHIQRLDTGGLKKALGHRRL"
/besthit="qcoverage 100 , hcoverage 62.5 , similarity
92.5 , identity 92.5 , evaluate 1.13e-14 , alnlength 40 ,
Bacteria , Proteobacteria , MBV2145441.1 winged
helix-turn-helix domain-containing protein [Wolbachia
endosymbiont of Pissodes strobi]"
gene 31975..32391
/locus_tag="wEsol_00904"
CDS 31975..32391
/locus_tag="wEsol_00904"
/codon_start=1
/transl_table=11
/product="hypothetical protein"
/pfam="DDE_3 DDE_1"
/translation="MKLGRQNFYLYSAVNPRNGETSSLFAPNVNTDCMNIFLEQMSQY
LGTREAFILVDCAGWHRSGKLKIPQNITLIYLPYPSPENPVERLWQYLKDNLIKNNRI
YDSVSLLLED TICAFIRNITESSIKTICSVSYLPTYL"
/besthit="qcoverage 96.3768115942029 , hcoverage
68.9119170984456 , similarity 90.2 , identity 75.2 ,
evaluate 5.34e-72 , alnlength 133 , Bacteria ,
Proteobacteria , EAL57825.1 transposase family protein
[Wolbachia endosymbiont of Drosophila ananassae]"
gene 32388..32507
/locus_tag="wEsol_00905"
CDS 32388..32507
/locus_tag="wEsol_00905"
/codon_start=1
/transl_table=11
/fullproduct="qcoverage 100 , hcoverage 100 , similarity
100 , identity 100 , evaluate 9.62e-21 , alnlength 39 ,
Bacteria , Proteobacteria , ONI58343.1 hypothetical
protein N499_0015 [Wolbachia pipientis wVitA]"
/translation="MIFGIIPKFWISDKKARGRMDYGFVELDFEYLISSFQID"
/product="hypothetical protein"
/besthit="qcoverage 100 , hcoverage 100 , similarity 100
, identity 100 , evaluate 9.62e-21 , alnlength 39 ,
Bacteria , Proteobacteria , ONI58343.1 hypothetical
protein N499_0015 [Wolbachia pipientis wVitA]"
gene complement(32571..34829)
/locus_tag="wEsol_00906"
CDS complement(32571..34829)
/locus_tag="wEsol_00906"
/codon_start=1
/transl_table=11
/pfam="AAA_13 Pfam-B_967 ATG16 Pfam-B_5362 Pfam-B_5362"
/fullproduct="qcoverage 100 , hcoverage 100 , similarity
99.9 , identity 99.9 , evaluate 0.0 , alnlength 752 ,
Bacteria , Proteobacteria , WP_077188054.1 hypothetical
protein [Wolbachia pipientis]"
/translation="MPSSRQVVQYNSFDSNNLEDTTLPCVFKDFTITSEEIFEIGSEG
NQVIDNSDGEIERLQQENFDLKKNEKLLCEYKGIAEEYDQEVSELSKKNQILEKKIKE
LEAQLQRKTRELTNGQEIEQLKQEIEKVLLDVKNKNDIIGNLDSKLEDMKSEIQMID
KKNEELQQRNLVSNSSRLRKESVVLVDSIEDLKSNYENQILEKDKELNDVIGQLYV
YLSEREELFAEFSSLQNEENESLKQKNFYISNEVSLEDELNKENVRKEIVRPQSTTKVE
MRRINDNDDQESIWLRYEAEDYQTGEDKKPKNTNYDIGVWNEDDDDESSDDQKSTWLYE
KVENNQDYRTSEDKNLENTDYDIEVWNKDDDESSNDQESTSESVDYNVSYCFDYDEIVG
RTYGQLVYNANIIRKKDSFSLAKVKLREREREKEYESIWKIDNIHDELDALGNYGNEE
DYEECNKRLDKIVSEALKQVRMFTLPYKANISLVDRIIDTLQKLYFSYDTTRIYGFLD
EKKILQIVSRGASLNRFSDDEHGDVFNIICSDRYALDQREKILLELKDILVYKSIVDVS
VKTDDHDFELEMNGHFCIKYPKDSVVEVARIFNNKKAKNLGLEIGMLQVGESIVRVE

```

```

NEEGVRNYTDISEGRIEMSFTTYFGKVSVYLSPSDRDNNKIEVKLANEESIARFSKLE
DKSSLGGSCLLGGKNVSIGIEDGYFEINSVSEELAKTMKQSDCTIEKSYVPSSFMKE
AYCNQLVNERGI"
/product="hypothetical protein"
/besthit="qcoverage 100 , hcoverage 100 , similarity 99.9
, identity 99.9 , evalue 0.0 , alnlength 752 , Bacteria ,
Proteobacteria , WP_077188054.1 hypothetical protein
[Wolbachia pipientis]"
gene 35209..35865
/locus_tag="wEsol_00907"
CDS 35209..35865
/locus_tag="wEsol_00907"
/codon_start=1
/transl_table=11
/fullproduct="qcoverage 100 , hcoverage 100 , similarity
100 , identity 100 , evalue 1.38e-142 , alnlength 218 ,
Bacteria , Proteobacteria , WP_141456732.1
exopolysaccharide biosynthesis protein [Wolbachia
endosymbiont of Carposina sasakii]"
/cog="COG3932 COG3932 209 Uncharacterized ABC-type
transport system, permease components"
/pfam="ExoD"
/product="exopolysaccharide biosynthesis
protein"
/translation="MKRGKNLTEDKKLASDILKEVAGTGTADSDKVTLFDIKTALQER
GFGILIIIFSLPLSVPIPVPPGYTTILSIPLILFSLQLLLGFHSPWMPRWLERKSFKR
STLALVVKKTLPALKKIEKFMKPRMSFIFCGPGEKILAFIMLVCVLVIANPFPLTHFI
PAIGTTLISLGIMNKDGLVLSILGVLVSLCGILFALIVIVKGPQLIISAFSFLKSFAYG
"
/besthit="qcoverage 100 , hcoverage 100 , similarity 100
, identity 100 , evalue 1.38e-142 , alnlength 218 ,
Bacteria , Proteobacteria , WP_141456732.1
exopolysaccharide biosynthesis protein [Wolbachia
endosymbiont of Carposina sasakii]"
gene complement(36667..38739)
/locus_tag="wEsol_00908"
CDS complement(36667..38739)
/locus_tag="wEsol_00908"
/codon_start=1
/transl_table=11
/product="hypothetical protein"
/pfam="Peptidase_C48"
/translation="MVFHTQGSDIVILHIRDNNNAVQQGAINLQDLNVDGNNVHVREVS
CTLNNQLGLNIHTDNLGLYHNYQNNNANNFLGGNLVQVPNAGNVYNALNQVMNDGWQD
RFQHQELFRNISAVLMPEDTHGNMIIDVNSKDKFRSILHGTIFYASDNPKVFLAMYKVG
QTYSILKRWQEEEGERVILTRVTEQRLGLLLLRQPTADTHPIGYVLGFADNAEEVEQEQ
DEARYKITELMKQRGYLPITSGNEVVLSYAVFNRAQRAEDFISLPQQAVYVHRLDR
RGHDSRPEVLVGPESVIDENPPENLLSDQTRENFRRFYMEKRPQGNSIFLLDIDDLNH
VPFSYLQGTTRAQAIETLRSRIRGGGTSTAQGILQQINTILRRNNAREIEDVHNLALD
FATENQNFRYWLAHDMFFAARQYTFHDDRSNPTNDRHDAITSVGVDGNQNDPTGRD
LLSSNIDNFKQKVDSGEKDRLTAIINVGNRHWVTLVIVHQNGNYGYADSLGPDSRI
DNNIRGALRECDISDDNVHDVSVHQQTGDHNCGIWAYENARDINQAIDQALQGNSNFG
EKGEIGIYIRGLLSAGIGNDTRQPQRNEQYFRNRRRNISQLFQNDLSLSPRGRLIQG
RPGIQHEIDPLLQFLELQYPQRRGGGALQLGGERVISIDFGPQSVLDEIDGVNRVYD
HSNGRGRSR"
/besthit="qcoverage 100 , hcoverage 73.015873015873 ,
similarity 99.9 , identity 99.7 , evalue 0.0 , alnlength
690 , Bacteria , Proteobacteria , QEF50248.1 ulp1
protease family, C-terminal catalytic domain protein
[Wolbachia endosymbiont of Drosophila ananassae]"

```

```

gene      complement(38784..40004)
          /locus_tag="wEsol_00909"
CDS       complement(38784..40004)
          /locus_tag="wEsol_00909"
          /codon_start=1
          /transl_table=11
          /product="hypothetical protein"
          /translation="MSGNGDLIRSLVDGDLEGFRQGFESFLDQCPSFLYHVSAGRFLP
VFFFSMFATAHDADILDANERVYFRFDNHGIDTGGRNRNTGNLKVAVLTSRDGQRVV
KCYSISDRPNSDGLRFSTREARNALIQKIIQQNPDLREGDLDFEQYKVCMHGKGKSQGE
AIATVFEVIREKDFRGRDKFAKYSASEISLLRQLLGDHRLTIQEIKGRQLNQNLRLQL
DRSVNFAQVAQQQQRIDNFMEILANNQRQNVERRMHREVLPIYITDIYDNCRQALENNI
ENRNQKFESHGFLLGFLANFSHRYTIGIDLDSLPRNSHVAFLIHHQAERENIPIVINL
AIFDTPSDVALNCAIGYAGRLHNSSFPIHTESRNTVCVGLNFNLNRIPIFRVDTVGLQ
QGRFPLVQTQFNNV"
          /besthit="qcoverage 100 , hcoverage 35.3966870095902 ,
similarity 99.0 , identity 98.8 , evalue 1.85e-281 ,
alnlength 406 , Bacteria , Proteobacteria , AGK87078.1
hypothetical protein wSo0011 [Wolbachia endosymbiont of
Ceratosolen solmsi]"
gene      complement(40058..41533)
          /locus_tag="wEsol_00910"
CDS       complement(40058..41533)
          /locus_tag="wEsol_00910"
          /codon_start=1
          /transl_table=11
          /fullproduct="qcoverage 100 , hcoverage 100 , similarity
100 , identity 100 , evalue 0.0 , alnlength 491 ,
Bacteria , Proteobacteria , WP_015588933.1 MULTISPECIES:
hypothetical protein [unclassified Wolbachia]"
          /translation="MPTQKELRATMSKKLQEAIKHPDPAVAAGRKSAIKRWVGVLQDN
FMEHIKYFKGDKLKLFLHNVFQDEGCWSGVRLDNAALGQRFTEEKIGGIDNPLRKYEMA
CSYCVVDKIHPLFQKAFESYKNGFSSDELDSRGNPITDEYIRNSLLGGIRRKGPVDFD
WIDRESGELKKYDAVEGFDSA VKLRWSEGVEYFYNNHLKEEDKEKKLTEAIIALS RPQS
VEKDAPILDFCVRNIADKDTLLQKLSQKDKGIYSLFAELIESCFDFTVHDLVQCWCYE
EASARGDHSKEILSQDEYDLLLYSLSNVMLKNPESNVQARSLIMKIWKDCDFIEYRKI
SVNISNCIVPIQDMLAGLIINWKREDIYKSDEEKEVEKKEILDVILFAKDCFPKFEF
FKEKIIKNLRLCGREGMKDYVDYGLFAEELFSELEKTTLPLGPVGDGPWNNLRSRKA
HGSKETTLPVDDGPQSELGTPSVSGVSSYKKKSVFTLSGNK"
          /product="hypothetical protein"
          /besthit="qcoverage 100 , hcoverage 100 , similarity 100
, identity 100 , evalue 0.0 , alnlength 491 , Bacteria ,
Proteobacteria , WP_015588933.1 MULTISPECIES:
hypothetical protein [unclassified Wolbachia]"
gene      complement(41653..42366)
          /locus_tag="wEsol_00911"
CDS       complement(41653..42366)
          /locus_tag="wEsol_00911"
          /codon_start=1
          /transl_table=11
          /pfam="Pfam-B_13602 Pfam-B_12519"
          /fullproduct="qcoverage 100 , hcoverage 100 , similarity
99.6 , identity 99.6 , evalue 1.84e-170 , alnlength 237 ,
Bacteria , Proteobacteria , WP_015588934.1 MULTISPECIES:
hypothetical protein [Wolbachia]"
          /translation="MNIFVLDENPEIAAKMLCDKHIVKMLLETAQLLSNVFSIALKAP
NPFVSVIDQDIEVPYKLTHSNHPCSLWARQSKGNFCWLIIEYGKELCKEYTRQYRKRKH
SEEVINWCDSNKDLLIFRSTDMQAFIQALPDQYKCSSAVEAYRRYYLKEKMRFAKWEN
GREAPDWIICYTTPQLIQLINREAIQIGHEKGRAEGRKAIEVAKNSLKAGVSIDVI
AKMIGLSIDYIKDIQEEKF"

```

```

        /product="hypothetical protein"
        /besthit="qcoverage 100 , hcoverage 100 , similarity 99.6
        , identity 99.6 , evalue 1.84e-170 , alnlength 237 ,
        Bacteria , Proteobacteria , WP_015588934.1 MULTISPECIES:
        hypothetical protein [Wolbachia]"
gene      complement(42387..43283)
        /locus_tag="wEsol_00912"
CDS       complement(42387..43283)
        /locus_tag="wEsol_00912"
        /codon_start=1
        /transl_table=11
        /fullproduct="qcoverage 100 , hcoverage 100 , similarity
        100 , identity 99.7 , evalue 1.07e-204 , alnlength 298 ,
        Bacteria , Proteobacteria , WP_213863264.1 Rpn family
        recombination-promoting nuclease/putative transposase
        [Wolbachia endosymbiont of Rhagoletis cerasi]"
        /pfam="PDDEXK_2 Pfam-B_9730"
        /tigr="TIGR01784 T_den_put_tspse 273 conserved
        hypothetical protein"
        /product="Rpn family
        recombination-promoting nuclease/putative transposase"
        /translation="MALSKFLDPKNDISFRRIFGTEKNKDILIHFLNDILGFTDKSAI
        KDIEFLSTIQDPDIAAKQSIIDVLCRDEGQVQVIVEMQVAKTKGFEEKRAQYYAAKAY
        SRQADKGDQYQDLKEIIFIAIADCILFPDKSEYKSKHTIRDEDTNEHDLKDFYFIFIE
        LPKFPKTKEDQLSNIVEKWIYFFKYADETSEEELEKIIIGSDVIIKKAYEELNRFNWSE
        KEFIAEQEIKRILDEQAVLAQKLDDETEKGREEGILIGHEKGRKAEEKIEVAKNLLKA
        GVSIDIIAQTTGLTANEIKDLS"
        /besthit="qcoverage 100 , hcoverage 100 , similarity 100
        , identity 99.7 , evalue 1.07e-204 , alnlength 298 ,
        Bacteria , Proteobacteria , WP_213863264.1 Rpn family
        recombination-promoting nuclease/putative transposase
        [Wolbachia endosymbiont of Rhagoletis cerasi]"

```

# ORIGIN

```

1  gccacaata ttgactgcta gtacaacatt gcataattct attatggcta ctttgatcaa
61  aatttgcaag attttttatg cgaaatacta tataacaagtg attgtgattg atttcaattt
121 gatgaattaa cattctaata atattttgtt tagtctgcca atctaccaga tcaagttttg
181 attcaacact tgaggaaaag tttttcaagc tatctgtaac aaggctcaat tcttgttgta
241 acttcttttg atcgagtgtt ctttctttct cttcttcaat ttctttcaaa tgttgtttca
301 ttgttgatgat tcttggttca aattcttctt ggcttataaa cccttttagca tagctatcaa
361 taaatttttt gatacttaat cttagcttac tttcttgctt ttcacgtgtt tgattatgta
421 aaggtttttt gttctctgat aatctacgtt gatattcatt tgcaatccta tctggctctt
481 tcaagatact cttaacttct tcccatataa ctccatctaa tatatcagtg cgtattgatt
541 tattatcgca gattttattg ccattaaatt tgctagagtt tgtaccagag caacgatagt
601 aataatatgt cgacttttta tgaacgtggt ttgtaccaca ataagtatat tgacaacgtt
661 ggcataccat taaaccttgt aataaatatg tttctcttct ttgccgtact cttgctcttt
721 gtctattttc agctaattgc gtttgcactg aatcaaataa attttcattg attatccttg
781 gtactggaat ataagtccaa ttctctttat cactattaaa gcgaccactt ttaagtttac
841 cacaagttcc tttttttgac ttttttactt gtggttttga gcatgtctta gttttacatc
901 aagctgcttg tcctatataa gcaggatttt ttaacatggt ccaaatagtg ctccttttcc
961 aatacctttt tcctgttcgt gttattaccg gtatcttatt cagttcatgt acaacttctc
1021 ctatacttgc tctttcttgg ccaaccgcac taaatatatt acgcactata tttgcctctt
1081 cttcatcaac ctcaaattga gcacttcctt cacctacatg ttttgctatg tagcgataac
1141 cgtaaggcgc cctacccatc acacttatac acccagcttt ggccgcgatg agtttacctc
1201 tacggtttcg ttccataatc tttgcacgtt catattctgc tattgctccc tgaatctgta
1261 gaaataaatg ggaatcagga ttatcatcaa acttatgatt caaaaatact atttcagatc
1321 cagccttttt aaactcttcg agtaggatca tttgatatga aaatttccgt gatagccgat
1381 caggtgaatg aatgtatatc ttatcaatct taccttctgc tactctatca cgtaaactct
1441 ctaagccagg acgttctaag tttgatccac tgtaaccatt atcaacaaac ctatgctcat
1501 ctaataattc atgtccatca ctactaatgc gacgctccaa ttctacaatc tgactctcta
1561 tcgtattctc ctgtgcctgt tgtcttgatg aaacccttgc atacaagctt acggttgatc

```

|      |             |             |             |             |             |             |
|------|-------------|-------------|-------------|-------------|-------------|-------------|
| 1621 | ttttcttcta  | cctcctttat  | tttatatttc  | aataattggt  | cataagcatc  | tgccaaatat  |
| 1681 | gtacctgcca  | accgactggg  | ctcataacgg  | caattaatag  | ttaattcccc  | tttttgcagt  |
| 1741 | tttttcttcc  | tgtgaatttt  | cttatagggt  | aggagaattc  | ttatcaccag  | ctaaaagaaa  |
| 1801 | acgtttacca  | ttttaaacta  | aacaccttat  | ttaaaaaagc  | tgtttagttc  | gcgcaaacaa  |
| 1861 | gaaattctcc  | ttaattaaat  | atacaagatt  | tgaagaaatt  | atgtccaaaa  | aatctttgct  |
| 1921 | cgaattgtca  | tattatgtat  | aatatagctt  | atttaatgtg  | ttatgaatgt  | tcattccaagt |
| 1981 | tacgaattct  | gggaaagtga  | tttagaagtt  | ccggttaacc  | ttttactaga  | tcgctttcag  |
| 2041 | gattctaaga  | tacgtcaatc  | ttggttagat  | tctctttctg  | gtaaacaact  | gagcatcatt  |
| 2101 | tttcagcatt  | gctttaaaag  | tcatttaaat  | gggcaacttt  | ttcaggacgg  | agactacgat  |
| 2161 | gatagatcca  | ctcaacaaaa  | acgtaagata  | cttgccagtt  | actctgactc  | tctttttaac  |
| 2221 | tattatctca  | ttagccactt  | tgatcgtaca  | aaacttgagg  | ctacagtcag  | tgaagtagca  |
| 2281 | agatttgctc  | tgactgagaa  | gttaatgaga  | tcgtatctga  | taaaaaataa  | taccaagtat  |
| 2341 | gataaaagat  | ccttgttggt  | tttactattt  | cacataaatt  | gtgaatttct  | aaaatctgtc  |
| 2401 | tatcattttg  | ataaagtaca  | aaagaaaggt  | ttcataatcat | ttgctctaca  | gaaatcacca  |
| 2461 | agacaaataa  | acacttcatt  | taaagagttt  | atgtcacaag  | aagctgtaga  | gcagatactt  |
| 2521 | aaggatgatg  | accagttgca  | gggttttttc  | catcatcaag  | atcgaatata  | tatgtttgta  |
| 2581 | cgtcgaggaa  | gtgacatgga  | tttactgctt  | aattcaaaca  | aagttgttca  | tggtcataaa  |
| 2641 | cctgagtgga  | tgattttaga  | tttctctctt  | gatggcactc  | aggttaatct  | ctgtgctaaa  |
| 2701 | aatactaata  | aagctgtgga  | aatagcaaat  | agcattgtaa  | gtgggtattt  | tgactgcgaa  |
| 2761 | tgtacttttg  | taaatataca  | agataagaac  | ttccactac   | aagtgcacaa  | atcttctcaa  |
| 2821 | gcatgtatag  | atgggtctga  | ctctgacatt  | tgtatatattg | agttaaattt  | taagtcagat  |
| 2881 | tattttaaaa  | atagtaatac  | atatcttact  | ttaagtgtaa  | aaccgtatga  | tcctattgca  |
| 2941 | ccagagttac  | atatttttaa  | gccatctatt  | ggcaacatac  | tacaatctat  | tcaatcagct  |
| 3001 | aaagtaatgt  | tccaaaacaa  | aaaggttaaca | ttttctttca  | aaataagtgg  | ggaagtttat  |
| 3061 | tattcagagc  | atccactcaa  | taaaaaagaa  | agagaggacc  | tgaagaaaca  | tatggaacaa  |
| 3121 | tcttatggtc  | ttaaaattct  | ttcacgagca  | aattgctgat  | cttttaagtt  | caaatagttc  |
| 3181 | ttggatcaat  | ccaagccaaa  | atcatattaa  | agcagcaaga  | tacttattcg  | atcttggatg  |
| 3241 | gataaaaaatg | caagaaaggt  | atttatattgt | ttgctctcgt  | gaagaagatc  | atcttgattg  |
| 3301 | gccaaatgta  | attgatccaa  | attgtagcaa  | tgagattttc  | attgatccag  | actttgatga  |
| 3361 | agcatgtgat  | gacgctattt  | gtgaaaactg  | ttctcgtcat  | atttttaccta | atacttatca  |
| 3421 | aaaacagaga  | tttcatctct  | tatccatata  | cttaaataca  | gagaaaatca  | tagactgggt  |
| 3481 | tgaacaaaag  | ttgaatgatt  | caagacttat  | gtgggaaaaa  | gtagaaaaag  | gagtttatta  |
| 3541 | tattttgtaat | caaggctcgca | ttgtaaatct  | aataatcctt  | gattttttgta | ctgatgcat   |
| 3601 | attttttagct | atagataaac  | ttagagtcca  | tccgacagtt  | ctcatcactc  | taaaaaaaga  |
| 3661 | tatacctaata | ctattattga  | gcctatatat  | agtgccaatg  | gtagaactgt  | tttgtcagct  |
| 3721 | taagacttta  | actgagatat  | ttcaagaggc  | agctaaaaga  | ggagtaccag  | aggtagtaga  |
| 3781 | aaatacttct  | ttgcaagttt  | taccagcttc  | atataatttcg | cttaaacgtg  | ttgaaccaat  |
| 3841 | tgtaccaaca  | aagctttttg  | agttacaggt  | agttaaaggt  | atgggtatatg | ttaatagtat  |
| 3901 | tgaagttata  | aataaaaaag  | ctgcatcatg  | tcttaatat   | tttcgaatat  | tatttaggca  |
| 3961 | atttttacat  | gactgtgaga  | aagaattacc  | acctgaaaaa  | catacgcttc  | tcaatatata  |
| 4021 | tcagttagaa  | aagctcttgg  | gacttagttt  | agaagcagat  | ttagaacaac  | aaatcagaaa  |
| 4081 | accattaaat  | aaaatgcaaa  | gaacaatcaa  | atctataactt | gctgagaaat  | taggattaag  |
| 4141 | tattgaacgt  | gatgatgtaa  | tacaaacact  | tggttggcaa  | agattatcac  | atgggttatcg |
| 4201 | aattaaccct  | tttactttga  | ccataaaaaa  | atagagtttt  | ttgttatcaa  | aaatagtttt  |
| 4261 | tttcagctcc  | atgaataaat  | tttcccaccc  | cacgtgcaaa  | tggtcctggt  | tttacatcaa  |
| 4321 | gccattttatc | ctcttttgaa  | ccattagcca  | ttcctttaac  | tatttgcttt  | gcctgtaaaa  |
| 4381 | gatcttgcac  | tatacgctct  | aatctatctc  | ttcccatact  | atgaaaagtt  | tcaggtagtc  |
| 4441 | tatgtcgttg  | tttatgtatt  | cccgcacttc  | ctgtatgagt  | aaatggatgt  | cctgaactag  |
| 4501 | cagctcgcgc  | aattgaatca  | ataagatata  | ttttaagatc  | tttatcgcta  | atattttgag  |
| 4561 | cttttaattg  | ttcagtgatg  | tcttctaata  | gccctgtttc  | ttcattttctt | aggtaagtac  |
| 4621 | gtatggtagc  | atcagctagg  | ccatttgcct  | taacaacagc  | tccataaaat  | aaggcatttt  |
| 4681 | gtcttgggat  | ttttccaatt  | gacctaaaaa  | tcatcggttt  | agtcatatcc  | tcaacaggcc  |
| 4741 | aaaaagcaaa  | agaacacctg  | actccattta  | cgagagcaga  | agtacctoga  | atagcatctc  |
| 4801 | gtgcttgctc  | tactgttgat  | ataggttttt  | ctccctttta  | tttcttcata  | tgatgtgcag  |
| 4861 | taattattga  | agctccagtg  | ttacatgcta  | aatcagataa  | taaacacatg  | aggtaatctc  |
| 4921 | ctactgctgg  | atcagcattt  | aaatctgcat  | gaatgaaaga  | agcaagagga  | tcaaatataa  |
| 4981 | tgagcttcaa  | atcttttacc  | ttgctcagct  | gtttcactac  | agactcaaat  | tctggagata  |
| 5041 | tttctacaac  | tttaccgcga  | acattcttaa  | gtatggtaaa  | tgatcctcct  | atattttggca |
| 5101 | gtggtacaat  | aaatagccta  | tcttttatatt | ttaatctttc  | acattttggga | tcaagtcggt  |
| 5161 | ctaagcgacg  | atgtattttca | tttgtatcat  | cttctgcaga  | aaataccaca  | acagatccgt  |

|      |             |             |             |            |             |             |
|------|-------------|-------------|-------------|------------|-------------|-------------|
| 5221 | gttcagtaac  | aagttggcca  | aatccacaca  | cctgatctat | gctacctgca  | accttgaggg  |
| 5281 | ctaggtcaag  | aagaagcata  | cctttaccag  | tatcacccat | tgcagccaaa  | atagatgtta  |
| 5341 | cacccaaagg  | aaataatcct  | tcaaccaaga  | atctttgctt | tggtagctggg | cctacaaaac  |
| 5401 | gttctacact  | ccagctgaaa  | atatcaagtg  | gtggtttaat | aattatTTTT  | cttgagtttt  |
| 5461 | tttcgataaa  | ttcttcaata  | tttattctct  | ctaacacaca | atcagcagca  | ttccaactct  |
| 5521 | ttggttttatt | tgggtggaatc | ttaagcgtag  | caagtgatgt | aacaccaagt  | tctaaaagtt  |
| 5581 | tcttttcagc  | atttttggca  | tatttatcac  | ctggttcatc | gttgtccggc  | caaagtatga  |
| 5641 | tatgtttacc  | tttttagcgga | gtccaatctg  | ttttatcagg | ggtagcattt  | gctccaaaca  |
| 5701 | ttgctgttgt  | tgcagttatt  | cctttctcta  | taagtacttc | tgcgcatttt  | tctccttcaa  |
| 5761 | ccagaataac  | cttatctgat  | tttaagatac  | ctggaatgtt | gtagagcggc  | cttatctccg  |
| 5821 | gctctttgaa  | tctttgtttt  | ttaacatcaa  | atggttttaa | ctgttttttc  | tctagaggag  |
| 5881 | gatcataacg  | gtagactatt  | acgattactt  | gattgctctc | gtcgtagtag  | ttccagctac  |
| 5941 | aagtcaggta  | ttgttctaaa  | tctctagtat  | tatttttttc | tttgatgccg  | agccattcac  |
| 6001 | ttattgaaag  | cattacttca  | ggaaattctg  | ttttcgcatt | cttcccgtgt  | actgttgccc  |
| 6061 | aaaggtcaat  | aatgtcacca  | ccttctcctg  | ttgcaaaatc | tttccataat  | ccagctcttt  |
| 6121 | cacctgttaa  | ctctattaca  | gtgcttttgc  | ctttgttacc | ctgtacatca  | cctacataaa  |
| 6181 | acttatcgcc  | acgaaatgtt  | cctcttggtg  | gtaggtgaaa | aagacaagat  | cttatgtttt  |
| 6241 | gcagaagctg  | agttttcacg  | tttttgcaga  | caaattaagc | cgtagctata  | acttttagagt |
| 6301 | tctgccaacg  | cccatttact  | ctgctaata   | attttgctgg | tattgattta  | ccgtttctta  |
| 6361 | gctcatatac  | tacttgcaag  | acatttgcac  | gtttatttgg | ttgaaacatt  | accataccag  |
| 6421 | acgtataaaa  | acttctttaa  | gcatttagcac | caattaaagc | ttgaaaagga  | ctttttgcga  |
| 6481 | gtgtagctgt  | cgatactttt  | ctggtagtac  | gtgtaataat | gattccagcc  | ataggattaa  |
| 6541 | ttatagaacg  | taatttttct  | attctgcttt  | gcaggccagg | gaatatattt  | tcatagtcaa  |
| 6601 | tcgaatccaa  | gacgataaga  | tctatcgttt  | taaatttttc | ccctatgata  | tctttttattc |
| 6661 | tctctatacc  | ttcatcattt  | aaagttaatc  | tcatctttgt | agtaacaatc  | aagttttctt  |
| 6721 | ctgctagatt  | tggtagcctt  | tgattagtta  | tgatttgttg | tatgcgttcc  | ctgatataat  |
| 6781 | tgtactccat  | ctcattttgc  | agatagacta  | tttttagtgg | ccttgctgac  | ttcatcttaa  |
| 6841 | gaaacgacac  | tcctgctgca  | agatgtgcaa  | gcaaagagag | aagaaaataa  | cttttgccaa  |
| 6901 | cctttggcgt  | accaccaatg  | actaaaagac  | cacctggagt | gagaattcgt  | ggagctatta  |
| 6961 | tatcttctgg  | tattggtgat  | tgatcactca  | agtactgctt | tacagaaaat  | atTTTTtctt  |
| 7021 | ctctctcctt  | tttttcttca  | ctcttttgatt | ttttattgag | ccactttcta  | gcagaatata  |
| 7081 | tatcacccct  | aattaaaaatc | caaagatcaa  | taatatcacc | accagttcct  | tcagtaaaat  |
| 7141 | tacgccaatc  | accagcttcc  | ttacctacta  | ttttaactgt | aattgtattt  | ccattttaagt |
| 7201 | ctccaatata  | agttttttct  | cggtaaaact  | caccattttg | aagtaggtta  | gaaacacact  |
| 7261 | ccttgatatt  | atcaatcaat  | aacatcttta  | actctttttg | cttttttagac | ataaaattcc  |
| 7321 | catacatatt  | ttttatacgt  | ttaaagttga  | gattagctag | ctcgcaaaca  | gtttcaaaag  |
| 7381 | atTTTgaatt  | cagccaatga  | attgcttctt  | ctcttagctt | tgggtttttt  | cctactgcgt  |
| 7441 | cctgaatacc  | tctagtaacg  | acagcagacc  | aaagcttttc | ctcgtcgtac  | ttcaaaatgg  |
| 7501 | tactctgtca  | atttcataat  | ttttgcggta  | ttctggagta | actaccgagg  | caattttgtt  |
| 7561 | cttctctcca  | tattcatcag  | ttataacacc  | tacctttact | gtaaactcta  | agccatttaa  |
| 7621 | ttctgcaact  | gaatttaact  | tacgagcaag  | gattgcattt | tctgagttat  | catgtggatg  |
| 7681 | aatgtcacgt  | gccgattcca  | agatactgcg  | aagcatagaa | cgacccattt  | ctccccaagt  |
| 7741 | atcttctgct  | ttactacttt  | taataccaat  | tatttgataa | atTTTgtgct  | ttgcgtatgg  |
| 7801 | gccttcaata  | acggtaaatt  | ctgtatttaa  | ataaatgcta | ccggtagtgg  | ggcttttagt  |
| 7861 | aaaccaatgc  | tcataacctc  | caggcttgat  | tgatcatttt | acctttacta  | ttgtaccttt  |
| 7921 | tggatatcaat | ctactttgcg  | gttttacagt  | gttaaaatca | gttaataggt  | tttgtaacat  |
| 7981 | atatcactct  | ccatgtttta  | atTTTaaaac  | ttgcttttaa | tctttgtaag  | cagcttgccct |
| 8041 | aaatgcgggt  | cttcaaccat  | actcaggcgt  | ccactgcggg | cttttagctgg | gtatccccaa  |
| 8101 | gggttttaaag | tgtggcaaac  | aaaagagcgt  | ttctccgttc | catcatctct  | cttgattcca  |
| 8161 | accatactga  | ttacttcatc  | aactattcca  | ggaatctcac | tagcagtttt  | agtcccttcg  |
| 8221 | cattgaggta  | gccaaattgg  | acgattgaaa  | tcatcgagat | attgacctaa  | agtgccaact  |
| 8281 | atgatgatgt  | ctttgtctct  | gatgtgttga  | aattgattga | gccaagccat  | catttctctga |
| 8341 | gcaagtaatc  | catatgcagc  | tctcatgtcc  | tgttttcccc | atctctcaga  | aaaagcctca  |
| 8401 | ggttgcattt  | ttgcccataa  | tagacataaa  | cgtgaagcaa | cggttatact  | atctacaaag  |
| 8461 | atgcatcggt  | atttagaaaa  | ctcagggaaa  | agatctttgt | acttaccaga  | tacatgttca  |
| 8521 | tgggtgtctt  | ggctatatgc  | ttgatcatac  | ttcagcgcag | gattaggccc  | ccctataaga  |
| 8581 | caagcaatat  | ctctagcttc  | attccaagtg  | cgaagactaa | ttgaatctcc  | ttgccaatct  |
| 8641 | tgaacagcaa  | gaagccctgc  | ttcaaaatca  | aggcaaagtg | ttggttcatc  | tacggctctt  |
| 8701 | aggagacttg  | ttttaccaat  | accataagga  | ccaaagatga | ccattttttac | agttgatatt  |
| 8761 | gtttgcaatc  | tttcattatt  | attcaaaatt  | ttaagaacca | ttattttatcc | atgctacgat  |

|       |             |             |             |             |             |             |
|-------|-------------|-------------|-------------|-------------|-------------|-------------|
| 8821  | gtatatatat  | acaagaaagg  | caaaaatttt  | gttcaatttt  | tctttttgcc  | ttcgtagtaa  |
| 8881  | ataggagaaa  | gtttggcacg  | tatcttcttg  | ataatattgt  | ttaaagtggg  | tcttgaaacg  |
| 8941  | ttgttcattt  | tggcaacttc  | atgtaagtta  | aaaaatttaa  | gttgctcaca  | tatatatttc  |
| 9001  | cattcctttg  | gtaaaaccga  | gatcatatag  | tctacatcaa  | tgcgttttgt  | tatttcaccc  |
| 9061  | tcaagtagct  | ctgttacatc  | gatactaata  | tagttattga  | tatcgcgttt  | tgcacatcgc  |
| 9121  | tgtttcttta  | acagggttaat | agctttat    | tcagttaatc  | ttgctacaaa  | gggtgttaag  |
| 9181  | ctacttttat  | cttcatcata  | ctgatcaagg  | catggccaaa  | tttcacagaa  | gagttcttgc  |
| 9241  | tcaagatctt  | cgtgagcttc  | attaataaag  | cacttagcaa  | gtttcagttc  | ataagcttga  |
| 9301  | tattttacat  | ttttaataac  | tatatggtag  | ttttgtaatt  | tcataacttt  | ccttaaaaac  |
| 9361  | aaattgatgc  | ttttaaggat  | gagagttatt  | aatgctgtta  | tgtaggacag  | gagcaaaaat  |
| 9421  | aaataatact  | gatgcgat    | ttaatctatt  | gatattctgt  | tatttttttt  | tgagaataat  |
| 9481  | actgatgcaa  | tttaaaataa  | tacagttcag  | gtttttggaa  | cctatttttg  | atggatttca  |
| 9541  | aagaatgggt  | agctcaggct  | tcctaaagtt  | atattaaaaa  | tatataagaa  | tttcatattt  |
| 9601  | tgaaattcaa  | tatcacctaa  | agagctaaaa  | atgtggattt  | cgctattaaa  | agaatagctt  |
| 9661  | aaatttttaa  | gaggaaaata  | gttgaaaagt  | atgctctcta  | taaccttaag  | ttccgttcct  |
| 9721  | aattactgga  | ttcctaaatc  | aggaattagg  | aatcaggaat  | ctaaaactag  | cctgtatggc  |
| 9781  | gggttttcac  | catgcttcc   | taaaaccgtt  | cctaggaacg  | gcatactctg  | agtccgcaa   |
| 9841  | tatggaggat  | tctagcttcc  | tgaaaccctt  | atatataata  | tatatatata  | atacatatat  |
| 9901  | aaaaatatac  | acatatataa  | aaacatataa  | aatatcagat  | tagaataata  | aaagaacctc  |
| 9961  | tgaaagtaga  | aaaatcatgt  | ttagaagggt  | tttaaataaa  | catcttcaag  | aaagagttaa  |
| 10021 | ttataaaaaa  | ttttcaaaaa  | ttgaagattt  | tttggaacgta | attttttcaa  | atccttgata  |
| 10081 | tatatgtact  | cggcaattga  | aagatttggt  | aaacaaattg  | gctgtaaaag  | agttttcatg  |
| 10141 | ttagttgtta  | aatttcgaaa  | attaaagatt  | ttttggacat  | aattttttcg  | aatcctgtat  |
| 10201 | atatatgtac  | acaacaactg  | aaaggaaatg  | ctcaccctag  | atcctggcaa  | acaaactggc  |
| 10261 | tggactat    | taaatgatgg  | aatagtgc    | agtggaagta  | agagttttca  | tgtagcagg   |
| 10321 | tttagtggtg  | gtggaatgca  | gtttttaaat  | tttcgtaatt  | ggcttaattc  | acttaagtat  |
| 10381 | aaatttccag  | gcattgaagt  | tgtgtacttt  | gaagaagtga  | gaagacactt  | gggaactgat  |
| 10441 | gctgcacata  | tctatggagg  | gttttttagca | cacctttctg  | cttgggtgtg  | ggaaagcaat  |
| 10501 | attccctatc  | aagggtgtttc | ggttaagact  | attaaacggt  | ttataactgg  | caagggaaat  |
| 10561 | gcaagtaaag  | ctgatgttat  | tgaagcagtg  | cagaaaaagg  | gtttttgtcc  | aacagatgat  |
| 10621 | aatgaagcag  | attcttttagc | attaatgttc  | tatgttatga  | attttagtaa  | agattttaat  |
| 10681 | acactagaaa  | tatcataaaa  | agtgggtcct  | tttggccaga  | atagcggatt  | tggtggtcct  |
| 10741 | gacctcgggc  | cttcttttagc | gttagacata  | tttcaaatgt  | taactactta  | cgaaattata  |
| 10801 | gctgagaagt  | gcttgagcag  | tgctaaaaaa  | ggagaaaaaa  | aggtgagaat  | tacgcaagca  |
| 10861 | gagtgggcaa  | gggaaaaaagg | attttctgagg | caatatgtct  | gttcttttagt | aaaaaaagga  |
| 10921 | atagttgagc  | tggaagatgg  | acttattgac  | cgagaacaag  | caaatgaagc  | ggtagcagca  |
| 10981 | ataagagatc  | caagtcaacc  | actgaggaga  | aaagagcgcg  | gagaaacact  | ttcaacgata  |
| 11041 | ttgctaaaaa  | cgcgaaataa  | aatgaaacc   | gagcgtggta  | aacttttgga  | agctaaagtg  |
| 11101 | aaagctgaaa  | taggcaaatt  | tgtgtcaatt  | gaagaggtaa  | aaactgaagc  | atttaacgta  |
| 11161 | gcaagagt    | ttcgtaataa  | tttgcttaat  | attccaaata  | gagtttcagc  | actacttgca  |
| 11221 | tactgagt    | acactgaaaa  | gattcatatg  | gtactaaactg | aagagattac  | aaactcactc  |
| 11281 | caagaattat  | ctaatactaa  | atttcaaata  | taaaaaagat  | tttgaatata  | aatggctga   |
| 11341 | taacttaagt  | ttggagttaa  | taaagtgtct  | cattaatcaa  | cctggattag  | atgttaatgt  |
| 11401 | cagagggtta  | aacggaaaaa  | ctccactgca  | ttgcgctata  | gagtttgatg  | aattaagcat  |
| 11461 | ggtggatt    | ttactcacga  | agaagaatat  | taatcctttt  | gtggaagata  | atgaaggtaa  |
| 11521 | aacatctctt  | gattacgcca  | aagaggggaa  | aaaagcagaa  | atattacaag  | cactaattaa  |
| 11581 | taacaaatac  | ggatcagagc  | aagatagttt  | acttcattta  | gctgcaatga  | taggtgaagt  |
| 11641 | taatgcagtt  | agatatttga  | tcagaaaaag  | tattgacggt  | aatgtacgaa  | atgctctgca  |
| 11701 | tcatacacca  | ttacatctag  | cagcagggat  | aggacatgca  | gaagttgtaa  | agattttgat  |
| 11761 | aagagaagga  | aaagctgaaa  | tagatgtctt  | tgatgcacga  | aatcagacac  | caatgcacta  |
| 11821 | tgcagttaat  | aataaaaaagt | tggagatagt  | aaagttactg  | ctgaagcttg  | gagcagatgt  |
| 11881 | gaatagtgca  | cgcattgggac | aaaactcaat  | gaaattgtcg  | cctgttcata  | tagctgtaag  |
| 11941 | taataactaat | tacgatgaaa  | gagacttatg  | tcttgatatt  | ctcaaagtgt  | taataaggga  |
| 12001 | gcctaagtgt  | caagtcaatt  | tacaagatta  | cgaaaaataa  | acaccactac  | attacgctga  |
| 12061 | aagactgaaa  | acaatagagg  | ttttactaac  | acgagaagac  | atagaccctc  | tggtaaaaga  |
| 12121 | cgatagcggc  | aagacactat  | ttgattacgc  | tgaaaaataga | cctgagataa  | agaaggtttt  |
| 12181 | gatgagtagt  | aaatacggct  | ctgaaaagaa  | tagtctattg  | catttagctg  | cacagaaagg  |
| 12241 | agttgtagat  | acaatttttaa | aagaagaaat  | cgatattaat  | atcttaaaata | acaaagggtca |
| 12301 | ctctccgatt  | taccttgctg  | cggaaaaagg  | acatttacat  | gtagtaaaat  | tactactgga  |
| 12361 | aaaaggagca  | aactatacac  | ctgttttgca  | cttagcaatc  | aagtcaaata  | atttagaatt  |

|       |             |             |             |             |             |             |
|-------|-------------|-------------|-------------|-------------|-------------|-------------|
| 12421 | gctaaaaaact | ttatTTTaaag | aaaagagtat  | caaattacca  | gatgagatag  | gcagatctgt  |
| 12481 | accaatTTtat | tataGgtgta  | tagaacgtag  | agatgcaaaa  | gtaagaaaat  | acaataatgt  |
| 12541 | gatctgtgtt  | tctacctcag  | taagtgcagt  | agcaatagcg  | gtatatatat  | ggTTaacagc  |
| 12601 | aataacaata  | agcaatgcaa  | tcattTTTtgc | aacaataaca  | gggatatttTg | cacttattat  |
| 12661 | agcaataatg  | ataagtGagg  | tgagcaaaaag | atatatagaa  | aacgaatttc  | agaaaaagat  |
| 12721 | gtttatggaa  | ctggaggagt  | gtagttctac  | tgTTaatgat  | gTTgagatag  | aaccagttat  |
| 12781 | gagtagatgc  | agataatgat  | atacgctaca  | tctTTTtctg  | aaggTTtaag  | gccagatccc  |
| 12841 | cagctTaaag  | tatcagagtG  | ggcgaatgag  | tatcgagttt  | tagcgccaac  | tgcagcatca  |
| 12901 | gagccaggaa  | aatggagaac  | agaaagaact  | ccttatTTtaa | aagaaatcat  | ggattcacta  |
| 12961 | tctccttctt  | cacaggctga  | aaaagtagta  | TTtatgaaaag | gagcacagat  | tggaggaaca  |
| 13021 | gaagctggta  | acaactggat  | aggctatatc  | atcgatcaaa  | caccagggtcc | aatgctagta  |
| 13081 | gtacagccaa  | cagTTgaaat  | gggaaagcgc  | tggtcaaaaag | gaagatttTgc | accgTTaata  |
| 13141 | gagagtacac  | catgTTTtaa  | aagTaaagta  | aaggacccaa  | ggtcaagaga  | ttcaggcaat  |
| 13201 | actgtacaaa  | gtaaggagtT  | tccaggTgga  | atagtagtaa  | taactggagc  | aaatagcagt  |
| 13261 | gtaagcctcc  | gatctatgcc  | agTaaagtat  | ctctTTtctTg | atgagataga  | tgcctatcca  |
| 13321 | ggagattctg  | gaggTgaagg  | agatccagtt  | tTactcagca  | tagcccgtac  | taatacattt  |
| 13381 | gcacatcgaa  | agattTTTttt | agtgtcaaca  | ccaacgattc  | atggaataag  | cagaattgag  |
| 13441 | aaagaatttTg | aagcaacaga  | taagagatac  | TTTTTgtac   | catgtccgca  | ttgtaattat  |
| 13501 | taccaagtat  | TaaagtggTc  | acaaataaaa  | tgggaaaata  | atgactcaag  | aacagcacat  |
| 13561 | tatgtctgca  | ctgaatgtag  | cggcaaaaata | gaaaatcatc  | aaaagacaga  | gatgctagac  |
| 13621 | cgtggagaat  | ggagagctac  | aaatcaagta  | cacaatagca  | aagtaatagg  | atttcacctt  |
| 13681 | tcaagtcttt  | atagcccagt  | tgggtggTat  | agTTggcaac  | aagcagtaga  | ggattTTtctg |
| 13741 | catgcaaagg  | aaagtgaaca  | attactgaaa  | gTTtggatca  | acacaacgct  | tggagaaacc  |
| 13801 | tgggtagata  | agggagaagt  | accagactgg  | aagcaattat  | ttaaccgaag  | agaattTTTtt |
| 13861 | cccgtaggca  | cagtgcctag  | gagagaagtG  | gtactTactg  | caggTgTTga  | tgtccaaaaa  |
| 13921 | gatcggttag  | aagtagaagt  | tctagcatgg  | ggaaaaagcc  | gcgaaagtTg  | gtcaatagac  |
| 13981 | taccgagtat  | tTgaaggTga  | tactggaggc  | ggagaagtat  | ggggaaaact  | ctctgagctc  |
| 14041 | Ttaaattcatc | attTTtatcgg | tcaaaatggg  | ctTgaatata  | Tgataagtat  | gatggcagtt  |
| 14101 | gatgcagggt  | atgcaacgca  | agaagtatac  | aactgggtaa  | gaggTcatca  | aggagctgga  |
| 14161 | agagtaatgg  | cagTTaaagg  | Tgtaaataaa  | gccctagTac  | cacttagcag  | tccaagtaga  |
| 14221 | gtagatataa  | cagTTggtgg  | tcaaaagcta  | aaaagaggaa  | Taaagctatg  | gccagtggga  |
| 14281 | gtatcgatat  | Taaagtcaga  | gctTTTTtcaa | tTacttaata  | TTTTTaaaaga | agaagaaggga |
| 14341 | aaagctctac  | ctggatattTg | tcattTTTccc | gagtatgcac  | ctgaatatTTt | Taaacagcta  |
| 14401 | acggcagagc  | aattagTcag  | caaggtagTg  | aaaggatata  | ccaaacaaga  | gtggcagaag  |
| 14461 | gtaagagaaa  | gaaatgaagt  | gTTtagattgc | cgaatttatg  | cgagagcagc  | atctattTgcg |
| 14521 | cttggaatcg  | atcgTTggcc  | agagagTaaa  | Tggaaatagtt | Taagtgaaaa  | gccagaaaagc |
| 14581 | aaaaaaccta  | aaaaagtGag  | acaaagcaaa  | TggTTgaaatg | agaagTaaga  | Tgtacaacga  |
| 14641 | agagtatttTa | attcaagtcg  | aagaagcgat  | aaaaaagctg  | caaagcggag  | agcgagtagt  |
| 14701 | atcaattgct  | TatggTgacc  | atgtggtgag  | atatgctgaa  | gTTcaaataa  | atgattttatt |
| 14761 | gaatttTaaga | caacgaatta  | aggctgagtt  | aaaagTTgca  | ggtatgaagc  | caaagaggaa  |
| 14821 | aattgTTTTt  | tcaacgagTa  | aagggatcat  | ataatgataa  | aaatcgTTTga | aagggaatttt |
| 14881 | atgacaaaag  | Ttatagcaaa  | agaatataca  | gaattTTTtag | agcagctgaa  | agagcagatt  |
| 14941 | gctactagTc  | gTTataaaagc | agcattagca  | gTaaatagca  | agcttattTgt | gctTTtatcac |
| 15001 | catattggca  | cagagatctt  | aaagcggcaa  | aaagaacatg  | gTTggggTgc  | Taaaattatt  |
| 15061 | gatcaactca  | gtcgtgattt  | aagagatgct  | TTtcctgata  | Tgaaggggtt  | tagcattcag  |
| 15121 | aatctaaaaat | atatgagaag  | gTTtgcgga   | gaatatagcg  | aaaatgaaat  | TggTcaacaa  |
| 15181 | gctgttgacc  | aattacctTg  | gggacacaaT  | attgtaaata  | Tgtacgaagt  | Taaaaataaa  |
| 15241 | gaagaaagat  | TTTggTatat  | Taaaaaatca  | Tgtgaacacg  | gctggTctcg  | caatatctTg  |
| 15301 | Tctatgcaaa  | tagagacaaa  | TTTgtataaa  | cgtgaaggTa  | aagcaataac  | aaactTTtagg |
| 15361 | aataatctTa  | Tatcacctca  | atcagattTa  | gcacagcaaa  | cgctcaaaaa  | TccttatgTa  |
| 15421 | TTtgattTTTt | TaagcctTgg  | Taaaaaagcg  | catgaaaagg  | agatagaaaa  | agctctTgTa  |
| 15481 | gTcacatag   | aacgTTTtct  | TTtagagctt  | ggTgaagggt  | TtgcatTTTt  | aggaaaggcag |
| 15541 | TaccattTtac | gggTTggaga  | cagagattTtc | TattTtagatt | TggTTTTTTTa | ccatattaag  |
| 15601 | ctccgtTgct  | atgTTgTaat  | TgagTTaaag  | gccggtaaat  | Ttaggccaga  | atatactggg  |
| 15661 | aagatgaatt  | TTTacctTtc  | agcagTTgat  | gattTattTa  | gacagccagg  | Tgataatcaa  |
| 15721 | TcaattggTc  | Ttatcctata  | ccgctctaaa  | gTTggTgTTa  | TagccgagTa  | cgcattacgt  |
| 15781 | gacataaata  | agccgatagg  | cTTtgcgga   | Tataggataa  | ccgagaatct  | accagagaat  |
| 15841 | ataaagacag  | cTTTaccaac  | gatagaggaa  | Ttagaagctg  | agTTtatctaa | agTTTcagat  |
| 15901 | caggaaaagt  | gatgctactt  | aagTcattca  | aacaactatt  | Taacaagcca  | aaaatcaaaa  |
| 15961 | gctcagcgtg  | ggatgcagca  | ggctcaggaa  | gaagattTTTt | TcactTTTcaa | ccagagTTtag |

|       |             |            |             |             |             |             |
|-------|-------------|------------|-------------|-------------|-------------|-------------|
| 16021 | gaagtataaa  | caatttgctg | tctcaaaacc  | ttgaaacttt  | acgtagtaga  | tcacgtgata  |
| 16081 | tggtgagaaa  | aaatccttac | gctgcaaata  | taattgatac  | gatagtaagt  | aactctattg  |
| 16141 | gaacaggaat  | aaaaccgcaa | tcaaaagcaa  | gagatggaga  | atttcgaaag  | aaagtacaag  |
| 16201 | aattatggct  | aagatggaca | gatgaagcag  | atagtaacgg  | agtaagtgat  | ttttatggat  |
| 16261 | tacaagctct  | agtatgcaga | agtatgatag  | agggaggaga  | atgtttttata | cgtttaagaa  |
| 16321 | cgagaaagct  | agaggataga | ttttctgtac  | cattacaact  | gcaagtactt  | gagtctgaac  |
| 16381 | atthagaaaa  | taaaacaaat | aaaacttttag | caaatggtaa  | tgtaataaga  | aacgggattg  |
| 16441 | agttcaatag  | acttgggcaa | agagaagcat  | attacttatt  | tagagaacat  | ccaggagaag  |
| 16501 | gctcatttgg  | agaatcagtg | agagtaccag  | caaacgatgt  | tttacatatc  | tatagaccac  |
| 16561 | taagacctgg  | gcaaattaga | ggagagccat  | ggcttttctaa | tatactgcta  | aagctttatg  |
| 16621 | aacttgatca  | atacgatgat | gcagaattag  | tgagaaaaaa  | gacagcagca  | atgtttgctg  |
| 16681 | gatttattac  | gagactcgat | ccagaagcaa  | atatcatggg  | agaaggtgaa  | agtaatgagc  |
| 16741 | aaggagtagc  | actatctggc | ctggaacctg  | gaacaatgca  | gcttttagac  | ccaggagagg  |
| 16801 | acataaaaatt | ttcagagcca | tcagatgttg  | gaggaagtta  | tgaagcattc  | atgagacagc  |
| 16861 | aactgagggc  | aatagcaata | ggtacaggaa  | taacatatga  | gcagctaaca  | ggagatttaa  |
| 16921 | caggtgttaa  | ttactcatca | atcagagctg  | gattaataga  | gtttcgtcgt  | cgatgcgcta  |
| 16981 | tgctgcaaca  | caacattata | gtatttcagt  | tttgcaggcc  | agtatggagt  | agatggctag  |
| 17041 | agttagcagt  | actttgtgga | gaactgagta  | tagatgaaaa  | agtagtaaaa  | gcagcgaaag  |
| 17101 | aagaagtaaa  | atggatacca | cagggatttg  | attgggtgga  | tccactgaaa  | gaccagcaag  |
| 17161 | cacagcaaat  | ggcagtaaga | aatggattta  | agagtcgagc  | agaagtagta  | tcagaaatgg  |
| 17221 | gttacgatgt  | agaagaaatt | gaccaagaaa  | tagcagaaga  | tcaaaagcga  | gctaattcct  |
| 17281 | ttggactttg  | tttcgattct | gatgttaatc  | ataaaagggg  | aggaaggtga  | tgtggataaa  |
| 17341 | taaaccagta  | atggtagaga | gaagaagctt  | tgaactacta  | tcattatata  | acagcaaaca  |
| 17401 | acctatcttt  | aagaacttaa | agcattttca  | tataaaccca  | aaaggaatag  | caataatacg  |
| 17461 | tatttatgga  | gttttgacaa | aaaaaacaga  | agcttttgat  | catattttag  | atatgacttc  |
| 17521 | gtatgaaaat  | attcatgaag | agatagagag  | tgcttttagga | gataaaaagca | tagagacgat  |
| 17581 | tctacttgac  | atagacagtc | caggagggga  | agtaaaccgt  | gtctttgatc  | tagctgattt  |
| 17641 | tatttatgaa  | tcaagaacaa | aaaagagaat  | tattgcaata  | gcaaattgatg | atgcatattc  |
| 17701 | tgctgcatat  | gctatagctt | ctagcgcgtga | gaaggatatt  | gtgagcagaa  | cttctggtgt  |
| 17761 | gggcagtatt  | ggagtaatag | caagtcacat  | agatcaaagt  | aggtttgatg  | aaaggcaagg  |
| 17821 | tattaagtac  | accacaatct | ttgctggtag  | tcgaaagaat  | gatttaaacc  | cgcatgagcc  |
| 17881 | aatgacgtct  | gaaagtttag | aaagcttaca  | aaaagaagta  | ggaagactat  | atgaaatggt  |
| 17941 | tttgacagcta | atagcaagaa | acagaggtct  | ttcaatggaa  | aagattcgat  | caacagaagc  |
| 18001 | agctatatatt | tggcgggaaa | gcagtagaga  | taggtcttgc  | agatggagtt  | acaacatttt  |
| 18061 | ttgaatttat  | caacaatcat | aaaagtagga  | gtgttagtat  | gacaactatt  | gaggaaagct  |
| 18121 | acgagaactg  | tcgtagagaa | atttttagaga | taataagatt  | atgtaatgta  | tcaaagatgc  |
| 18181 | cagaaaagat  | aggagaatth | atagagcaag  | gcgtaagtgt  | tgagcaagca  | cgggaagttt  |
| 18241 | taatggagtt  | acttgcagag | cgaacgaaaa  | agacagagat  | actgagtgca  | ataccgcgga  |
| 18301 | attcgcagga  | agatttgatg | acacaggtag  | cgaaaagtcg  | gtgcatttaa  | attttataac  |
| 18361 | cgccatatat  | agtgtctctg | ggtaaataag  | tgtccaaaat  | gcgccataat  | ggataattat  |
| 18421 | aaggtaataa  | ccgcggtgta | tagcagttat  | aaacacggct  | gtaaaaaata  | aaaaaaggag  |
| 18481 | agaaaaagac  | atgataagta | taactgaagg  | aaataattta  | ggcgatcttc  | tgaaatatga  |
| 18541 | agtggtccaa  | ctatatcaa  | gagaccaa    | aacagtagct  | aaaggtcaaa  | atcttaagct  |
| 18601 | tggtgcagta  | gttgccaaaa | agacggaaga  | tggtttttatt | agagtactta  | atcctgctgg  |
| 18661 | aacagatggc  | acacaaacag | caataggtgc  | aatagtaagt  | gatgtaaatg  | cgacagaaaa  |
| 18721 | tgccaaagca  | gtaattatta | ctcgtggtgc  | aatactagca  | gatcatgcag  | ttgtgtggcc  |
| 18781 | agcaaatatc  | actgaagaac | agaaagctga  | agcaataaag  | caacttgaag  | cacgagggat  |
| 18841 | cattatccgc  | aaggagactt | aaaaaaaaact | attaaaaata  | caaaaggggg  | aaaagaaaaa  |
| 18901 | atgcaaaatc  | catttacaaa | tacagcattt  | agcatgacgg  | cgctaacaaa  | tgcgataaat  |
| 18961 | atattgccga  | taaattatgg | acgtgttgaa  | aatttaaact  | tgtttccaaa  | taggtcagta  |
| 19021 | agatttagac  | atatcaccat | agaagaacat  | aatggagttt  | taagcctggt  | gccaacacaa  |
| 19081 | gttccaggag  | caccagcaac | agtaggaaaa  | agaggaaaaa  | gaaaggtaag  | aacgtttacg  |
| 19141 | attccacata  | ttccacatga | tgatgtagtg  | ttaccagagg  | aagtacaggg  | aataagggca  |
| 19201 | tttggatcag  | agagtgaact | taaagcgctg  | gcagatgtag  | taacggatca  | tttgcagcta  |
| 19261 | atgagaaaca  | aacatgcaat | aacgttggag  | catttgagaa  | tgggagcgct  | gaaaggaata  |
| 19321 | attttagatg  | ctgatgggtc | agaattatta  | aatctgtaca  | acgaatttga  | aataacacca  |
| 19381 | aaagtagtaa  | attttgcact | gggaacagca  | acaacagatg  | taaaacgtaa  | gtgtctggaa  |
| 19441 | gtattgcggc  | acatagaaga | taatctaagt  | ggtgaatata  | tgaccgggat  | tcatgccttg  |
| 19501 | gtaagtccctg | agttttttga | tgcactcact  | tctcatgcta  | aagtaaaaaga | agcatatgaa  |
| 19561 | agatggcaag  | aaggagcagc | gctaaggaat  | gatatgagat  | caggattttac | gtttttgtgga |

|       |             |             |             |             |             |             |
|-------|-------------|-------------|-------------|-------------|-------------|-------------|
| 19621 | atcacgtttg  | aggaatatag  | agggcaagca  | actgatcctg  | aaggaaccgt  | aagaaggttt  |
| 19681 | atagaaagag  | atacagggca  | ctgtttttcca | gtaggaacag  | cgagcacatt  | tacaacatat  |
| 19741 | tttgcaccag  | cagattttaa  | tgaaacggta  | aacacactag  | gacaaccgct  | ttatgcaaaa  |
| 19801 | caagagccaa  | gaagatttga  | tagagggacc  | gatttacata  | cgcagtcaaa  | tcctctgcca  |
| 19861 | atgtgccatc  | gtccggccgt  | tttagcgaaa  | atagtaacaa  | catagtaggg  | tccccacata  |
| 19921 | gaaaactcta  | tttatgacct  | taaaaatata  | ccataaaaaat | ataagatatg  | caatatgttt  |
| 19981 | aaaataatat  | gtaaagactt  | ttagaaaaaa  | tggatatgcag | aaaaatataa  | agagattatt  |
| 20041 | taaagattgt  | tttgcccatt  | taggagagtt  | agctttgtat  | gagtcgaaaa  | ataaggcgta  |
| 20101 | catggtacaa  | gtattaaagc  | aagagccaga  | taaattatac  | gagattgggtg | aaggggcaatt |
| 20161 | tgtaggagaa  | acttttagtgt | tggaagtaag  | tgcgtttgat  | gtactgcagc  | caattgtagg  |
| 20221 | agatattttt  | gttataggtg  | accgtaaata  | taaagtatat  | tctccaccgc  | tgcaagataa  |
| 20281 | ttcaggaatg  | gtatggaaaa  | ttcgagcgtc  | aggagtataa  | atgcgtatta  | acaccggtag  |
| 20341 | tattatacaa  | agtatagatg  | ctgaaaggaa  | aaaagtggaa  | aaagcgacag  | tgagtgcatt  |
| 20401 | aaacaaaaca  | gcaatatggc  | taaaatcaaa  | agcagctaag  | gaaatcagtg  | aggaaaagag  |
| 20461 | aataaaaacta | agtttgataa  | gaaagagatt  | aagaattttt  | aaggcgaaaa  | ctagcagatt  |
| 20521 | agaagtgtta  | attagagcaa  | atctctatga  | cattaaagca  | tcggcaattg  | gcaaaaataca |
| 20581 | aaaaacaaga  | agaggatcga  | aagtaggaaa  | gcatgagttt  | ataggaggat  | ttgcagcagt  |
| 20641 | tatgccaaaa  | ggaaatagcg  | gtatgtttta  | acgtgaagga  | agggcagcat  | tgccaataaa  |
| 20701 | ggaagttaag  | ttgccactag  | aacctgaggc  | ttcaaggata  | atagggaatc  | ttgttaatta  |
| 20761 | tgaggttgag  | aaagtattta  | caaaattttt  | tgaacgtgaa  | ttaagttata  | ttacaggaag  |
| 20821 | tgtatgaatt  | ttaaagattt  | gcataacgca  | atttgcacca  | cactgaagaa  | agaaatacca  |
| 20881 | gcaatacaga  | catgtgaaat  | ttatccatcg  | ataagaaagg  | aattagtagc  | gccagcgggtg |
| 20941 | tttgtggaac  | ttagcggatt  | tgaaaaagga  | catgatcctg  | gaacagaaga  | attagcgctg  |
| 21001 | aaagcaagat  | ttgaagcgag  | gattgtgatt  | gatagcacia  | tagaaaatgc  | agctattatt  |
| 21061 | gtcaggtcat  | tagcagcaga  | agtagcaaaa  | gtagtagata  | aaaatacttg  | gaacgtaaaa  |
| 21121 | aatgtttcac  | caggagaatt  | tatctctgca  | gaagttgacg  | aatttagacc  | tgaattagat  |
| 21181 | gcataatctt  | gtgtggatgt  | agaatgggtg  | catacaatac  | acgtagggcg  | atctattttg  |
| 21241 | aaagaaggaa  | aatttatgcc  | acacaaaata  | gaaatcgggtg | aaataaatgt  | tagagaataa  |
| 21301 | ttttgcgatt  | gcagaattac  | agaggaaatt  | agccaatatt  | gtccgtatag  | gagttgtaaa  |
| 21361 | agaaatagat  | tgtgaaaaag  | caaaagtaag  | agtgaaaaata | ggagaatttt  | taacagatta  |
| 21421 | tttaccatgg  | ataacaagca  | aagcaggaaa  | agatagaaat  | tgggtctccac | cagatatcga  |
| 21481 | tgaacaagta  | atgggtatttt | ctcctcttgg  | tgaactatca  | ttaggagtgg  | tattaggagg  |
| 21541 | aatatatcag  | gaaaaatact  | ctgcaccaga  | ggataaaaaa  | gaaataaata  | gtgtgaagtt  |
| 21601 | tcaggatgga  | acaagattgt  | tatatgataa  | agagaagcat  | catttagaga  | ttgaagtagt  |
| 21661 | agacaaaata  | acactgaaag  | ctggggaatc  | gagcatagag  | atgacgaaga  | gcgaaataaa  |
| 21721 | actgaaagca  | gatagaataa  | accttaatta  | aatgaataaa  | tcggttgtag  | gagtaggaga  |
| 21781 | ttattgtgta  | gaagtaacac  | cgcattttttg | cattagtggg  | agtaacaatg  | tttctgtaaa  |
| 21841 | tggtaaagcca | atgtgcagac  | aaggagacaa  | atttagtgaa  | ggaagagcat  | taactgaagg  |
| 21901 | atcaaaaaca  | gtgttttgcaa | atgggttttg  | agcgggaaga  | gtaggagata  | tagtttcatg  |
| 21961 | tgggttttaa  | gtaataaaaag | gcagtgaaaa  | cgtgttttgca | ggctaaaaat  | ggaagggatg  |
| 22021 | gactccaaaa  | caggaaaaga  | attagaagga  | atagaacatc  | tgaaacaatc  | aataattgat  |
| 22081 | atactgacca  | ctcctattaa  | cagtaggata  | atgagaaggg  | attatgggtc  | tagactattt  |
| 22141 | gaattagtgg  | ataaaccaat  | cagtagagat  | ttaacacttg  | agatatatgc  | agcaacagca  |
| 22201 | gaagcttttag | ggaaatggga  | aaaaagattt  | aaattagaaa  | aagtaaaaaat | aacagagggtg |
| 22261 | aaagaaggaa  | aagtaacgct  | tgacctagaa  | ggattatacg  | taccaagtgg  | gaaaaacatt  |
| 22321 | cgcttttatag | tataaagatg  | cagcagacta  | acattattga  | gcgactgaac  | ttcgaagaaa  |
| 22381 | ttctgtctcg  | gatgaaggaa  | gagttagtga  | agtgtgatgc  | aagttttaca  | gcattagtag  |
| 22441 | aaagtgaccc  | agcgatgaag  | gtattagaag  | tagcagcatg  | gagggaattg  | ttactaagac  |
| 22501 | aaagaataaa  | tgaatcagta  | aagagcaatt  | tactaaaatt  | tgcaatggga  | gaagatcttg  |
| 22561 | ataatttagc  | tgagttttat  | ggagtggaga  | ggcaaaaaga  | agaagatgat  | gaacgattta  |
| 22621 | gaaaaagaat  | taaagcaaag  | atagtaggct  | caagcacgtg  | tggaagcaag  | gagtattata  |
| 22681 | ggtatcatgc  | actgtcagca  | gatagtagag  | taaaagatgc  | attagtagaa  | tcacctatac  |
| 22741 | caggaaaagt  | acaaatttca  | atcttatcaa  | cacaattatc  | cacaactggc  | atagtatcag  |
| 22801 | aagaactact  | taaaattgta  | aaaaagcagg  | ttactagaga  | tgatataagg  | gttttaaccg  |
| 22861 | atacattaac  | agtgataggt  | tgcaatatta  | cggaaataga  | tattcatagc  | agaatgagca  |
| 22921 | taagtcctgt  | gatatcgaag  | gaggaaataa  | agaagcagtt  | tattcagaag  | tttgaattag  |
| 22981 | caaaaagatt  | aggggtggagt | gtaacaagat  | cttggataat  | atcaaattta  | tttgtggatg  |
| 23041 | gtgtagaaaa  | tgtggaatta  | atcgagccaa  | aagaggatgt  | tgtggttcta  | ggtaatgaat  |
| 23101 | gtgcaaattt  | gcgaaattta  | aaggttgagt  | aatgctatta  | ccccc aaatg | caacaaaaca  |
| 23161 | agagcaagca  | ctggttgatg  | caacagatta  | taaggttgat  | ccaggctgta  | ttagagggtt  |

|       |            |             |             |             |             |             |
|-------|------------|-------------|-------------|-------------|-------------|-------------|
| 23221 | taagtttagt | cttaaagaag  | aaacattgcc  | gtggttgatt  | gaggaatatg  | aattggggga  |
| 23281 | gatactacgc | tgggtaaaag  | ataaaagaag  | agcgatagta  | gaaggagtaa  | aatttcaaag  |
| 23341 | gctacgtgga | actccagcat  | cactcaaaat  | agcgctcaaa  | tgggcaaata  | tagaagatat  |
| 23401 | taaaattatc | gaagaaccac  | ctggtaaaca  | tttttttgag  | ttgcaagtag  | ggataaaaga  |
| 23461 | ggtaccaa   | gacttcttcg  | tagatgcagt  | agtagagctg  | gcaaaactat  | tactgcctgt  |
| 23521 | aagatccaga | ttgatgagga  | tttttaacga  | ttattataat  | gcgcagagat  | ttatattgga  |
| 23581 | tgagagttta | tttgagagtc  | ttctttctga  | ttattcaggg  | gtaaaaatag  | aaaaagatgg  |
| 23641 | accagtgtta | tcatttgga   | gagtaaattt  | tttcaggctc  | agtgggtccag | ttattaggat  |
| 23701 | tatagaaaac | tatctacgcg  | atcattatga  | acgagcttta  | agcaatgata  | tatatcgcct  |
| 23761 | agatgtagca | atccttgag   | aaaccgagcc  | tcacacaaag  | aattataacg  | gtatttatga  |
| 23821 | aagaaatcat | ttgtggtaca  | acttaaaagc  | actatatcca  | ttaccacaga  | gtttattacc  |
| 23881 | atcgattaaa | tttgcaaaag  | cgcagatagt  | attatcagac  | agttgggatt  | taggagacat  |
| 23941 | aaatacgtgc | tttccagtta  | gtagcgtaga  | agaaagagga  | aataaatttg  | tattgggaag  |
| 24001 | cgataaactt | tcagggcaat  | attggaattt  | aaaacacaag  | ccaatttttag | aaagatttag  |
| 24061 | cgttactcac | aactataaag  | caaaaaatta  | tacagatcag  | aaggtcagaa  | aatatgtttt  |
| 24121 | agcagaacac | aacgtttact  | ataaaaaatga | tttagagcaa  | aaagactcaa  | tacacgaatt  |
| 24181 | agaaaattac | attttagtat  | tttaccag    | agtactaaag  | tggcatgaac  | atcgacattt  |
| 24241 | gcacagaagt | tggaaaaata  | gtcaagtaat  | atctctaata  | agttaagtac  | ttatatttag  |
| 24301 | atcctcatat | attatattaa  | caatagttta  | aagtgtatga  | aataaaaaaga | aaaggacttg  |
| 24361 | ctttcttatg | ctaaaaagga  | catgaattaa  | atagcagcag  | gtaaacataa  | gaaatttatc  |
| 24421 | tggcgctaga | aaagctaatt  | ttgtgaggta  | agtatgaagt  | ttagcgaaga  | aaagagagaa  |
| 24481 | tcttttagta | agttttttaa  | agaagtatca  | agtaacgggt  | ttaaaaacat  | taataaaaga  |
| 24541 | aatgaagaag | gagagacgat  | attgcaccaa  | gcagtagaaa  | tctctgatta  | caaaacagcg  |
| 24601 | aggttattaa | taaaaaaagg  | ggcagaggta  | aatgcaagag  | ataaaaaatgg | ttatacacca  |
| 24661 | ctacactgtg | cagtatttgc  | gaaaagctta  | gaaaatgtaa  | aagtgtctgct | aagggaagga  |
| 24721 | gcagaagtaa | atgccactca  | atatgtcact  | ggatgtacgc  | cactacactc  | tgcattgcaa  |
| 24781 | ataggaggag | caggagttga  | aataataaaa  | gagctagtaa  | aagcaggagc  | tgagggtaat  |
| 24841 | caactgaata | aatatggtgc  | aacaccaatg  | tattacattt  | gggaaagtga  | aaagtatcgt  |
| 24901 | ctatgtgata | gcaaagagag  | tgaaagggcg  | agtaaatttc  | tgagagaaaa  | aggagggaata |
| 24961 | acaaaaagta | gagaactgac  | gtgctatgga  | atagagagga  | tagtggaaga  | aatagcagac  |
| 25021 | atgctgaatg | ggagctatat  | gccggagcta  | aaaataatag  | agatagaaga  | aataagaaag  |
| 25081 | agagacaaat | cactaataaaa | ggaagaatgt  | gaaaatttag  | caagcaaaat  | aatgagccaa  |
| 25141 | gtaaatgaga | tgatagatga  | ggtggtgaaa  | aggagggcct  | agaaaagggga | tttaaatcca  |
| 25201 | aagaaaagg  | gaggtagggtc | atgagtaaaa  | aaggaaaaga  | ggagtcacta  | ttagagaact  |
| 25261 | catataaaaa | tatttatgca  | agagacaaga  | atggaagaac  | agctctacat  | tatgcagtag  |
| 25321 | aggtaaaaac | agtggaggtta | ttagtcgaaa  | aaggagcgaa  | tgtgaatgct  | aaagatatag  |
| 25381 | aaggatacac | agcactgcac  | ctagcggtaa  | cggagaaaacg | tctagaaaatc | gtgagggaat  |
| 25441 | tgataaaaac | aggagcagac  | gtaaatgctg  | aggaatatgg  | aaataaatgc  | atacctctac  |
| 25501 | accttgctg  | catggttaggt | gaaaaagcaa  | tagtggagga  | gctagtgaaa  | gctggaggag  |
| 25561 | aaatagagca | agcggataaa  | tttggaatga  | cagcaatgga  | ttatagtaaa  | gaagtaaccg  |
| 25621 | aggattataa | gaaagaaaaca | gacagaattg  | aaaagttatt  | tatgaaaggc  | taaaaaatag  |
| 25681 | gaggaagaaa | tagaaaagaa  | agtaatgaat  | ttagagagaa  | aacctttggg  | tgagctgaga  |
| 25741 | aaaacgtgga | agaaggtatt  | tggggaaaaag | gcgcctagat  | actcaaagaa  | atatctgata  |
| 25801 | ccaagattag | cttatagaat  | gcaggaaaaa  | gcgtatggag  | aaatgtcaag  | aaaggggaca  |
| 25861 | aaaagactag | agtatctggc  | agatcggcta  | gagaagggaa  | aaagaataag  | tagcgataaa  |
| 25921 | ctgccagtag | agggaacaga  | gctaataatta | gagagagggg  | aagagactca  | cgcagtaatg  |
| 25981 | gtaacagata | agggtttaat  | ctacagagaa  | gaatttttca  | catcattatc  | agcagtagcc  |
| 26041 | ggaaaaataa | tgggaatgag  | ttacaatggg  | ccgctcctat  | ttggtttgcg  | tgatcaaaag  |
| 26101 | ggaagggaaa | atgtgtaaag  | ggataagatg  | tggaatatat  | acgagaaaag  | caaatgaaga  |
| 26161 | cggcttagag | cagaagttta  | acagttttaga | tgcgcaacga  | gtagcatgtg  | agaagtacat  |
| 26221 | aaagagcaaa | gaaggctggg  | tagcattggc  | caaaagggtac | gacgatggag  | gtttctcagg  |
| 26281 | aaagaattta | gaaagaccag  | caataaaagga | attatttgaa  | gatgtaaaaa  | aaggagaagt  |
| 26341 | agattgtgta | gtagtatata  | cgctagatag  | attatcaagg  | gaaacaaaag  | acagcatcga  |
| 26401 | agtaacatca | tttttttagaa | gacatagagt  | aaattttgta  | gcagtaacgc  | agatatttga  |
| 26461 | caataatacg | ccaatgggaa  | agttcgtaca  | aacggtgtta  | tcaggagccg  | cacaactaga  |
| 26521 | aagagaaatg | atagtagaga  | gggtaaaaaa  | taaaatagca  | acatcaaaaag | aacacggact  |
| 26581 | atggatggga | ggaactttgc  | cgtttgggta  | tgatgtaaaa  | gataaagaat  | taataataaa  |
| 26641 | tgagaaagaa | gcaaaaaatag | taaagcatat  | atgtgcaaga  | tatttgagagc | tgaagtcaat  |
| 26701 | ggcagagttg | gcaagagagt  | taaatagcca  | agggtacat   | acgaaatcag  | atatctttaa  |
| 26761 | aaaagcgacg | gtgagaagaa  | taataacaaa  | tccaatatat  | atgggaaaaa  | tacggcatta  |

|       |             |             |             |             |             |            |
|-------|-------------|-------------|-------------|-------------|-------------|------------|
| 26821 | tgagaaagag  | tatgaaggaa  | aacatgaagc  | aataatagag  | gaagaaaaat  | ggcaaaaagc |
| 26881 | gcaggaattg  | ataaagaatc  | aaccatatag  | aaaagcaaaa  | tatgaggaag  | cgctacttag |
| 26941 | gggaataatt  | aagtgcaaga  | gttgtaatgt  | gaacatgacg  | ctgacatact  | caaaaaaaga |
| 27001 | aaataaaaaga | tatcgatatt  | acatatgtaa  | caatcactta  | aggggaaaaag | gttgtgaatc |
| 27061 | aataaacaga  | actatagtag  | cgggagaagt  | ggaaaaagaa  | gtgatgaaga  | aagctgaaca |
| 27121 | gctatatgaa  | aaatggggaa  | aaaaagcggg  | agagtggaaa  | aattttaagtt | ttggaaaaca |
| 27181 | gaaagaagta  | gtgaaaaagt  | taataaaaagg | agtaatggta  | aaagaagatg  | gaatagaaat |
| 27241 | gggttcggag  | gataaggtgg  | aattttatacc | aataatgaag  | aagaaaggaa  | ataaatgtac |
| 27301 | agtgattgag  | ccagaaggta  | aaacaaacaa  | tgcgttactg  | aaagcagtgg  | taggagccca |
| 27361 | cctatggaaa  | cgtcagctag  | aagagggaaa  | atatgcaagc  | gtaggagagc  | taagtgccaa |
| 27421 | aattaatata  | ggtacaagac  | gtatacaaca  | aatttttaagg | ttaaattatt  | tagcaccaaa |
| 27481 | gatcaaagaa  | gacatagtaa  | atgggaggca  | gccaaagggg  | ttgaagttag  | ttgaattgag |
| 27541 | ggaaatacca  | atgctgtgga  | gtgagcagat  | gaagaaattd  | tgcaaattag  | cgatttaaaa |
| 27601 | atcacacgat  | taatacttta  | ctaatacaaa  | ttagctacat  | aagagataca  | aagaaaaaaa |
| 27661 | taatatgaga  | aaactaatta  | ccggaaaaaac | taatgaagca  | gatataacct  | atgagttgcc |
| 27721 | atgtgatcaa  | gatcagttaa  | caagcaaaga  | taaaaaggag  | ctttttaagc  | tattaaaaag |
| 27781 | gatacaagag  | ggtaaaaagta | tcagtgaaaa  | aattagtaaa  | tcctttcatg  | atacacgaaa |
| 27841 | gattccgtgg  | atactaatag  | ttgatataata | tgaacgtaga  | agagacgtat  | tcacactatt |
| 27901 | acattatgct  | agatttttga  | agaataagca  | agctgagaat  | gatcttttag  | aagaagctaa |
| 27961 | aaaacatggg  | ctttttaagg  | agtttaaatcg | tacgaaaata  | gtctcggact  | acttaggaag |
| 28021 | tcatggagaa  | ttaatacgta  | catatagtac  | tgttaaagat  | gggtgtagtaa | gggtagaagg |
| 28081 | ttttgagcct  | tgggatgata  | aggaagtgat  | gaatccaaat  | atgacaagtg  | acaaagaaga |
| 28141 | aaaaaactcg  | ttaatagaaa  | ctattatgga  | aggatcagtg  | gcttataata  | tttcagaaga |
| 28201 | tattgaagaa  | gtttcggata  | agaataaaga  | aaatttttat  | ggagaacaac  | aagaagaaac |
| 28261 | cgcagaaaact | ggcactcagc  | cgtgcaagaa  | gattaataat  | gggtgaagatt | atgaaaggaa |
| 28321 | tgaagaaaat  | caagggaatt  | tcgctaactc  | aggaagaacg  | gtggtaaaaag | agctgaatgc |
| 28381 | tttaagaatc  | ttttcttcta  | acccttgtgt  | taacgataaa  | tctttcaaaa  | ttgcagatga |
| 28441 | agaatcatca  | acaaaagcaa  | tgcaacggag  | agcgattctg  | actgggtgccg | ttggggtggg |
| 28501 | gctactggta  | agtgggtattg | tatcacatat  | tatgaaaatg  | cctactatag  | gaacagttgg |
| 28561 | agtgattgct  | ggattggcat  | gcataagctt  | tgcgttgtac  | agtaccctag  | aaccgagtac |
| 28621 | aaagctagag  | aaggtagaag  | agctcttccg  | atccaacgca  | agagaaacatt | cctaaaaaac |
| 28681 | acagatatata | aaataatttc  | ctaagaaata  | cttctaattt  | actaaccaag  | tactaaacct |
| 28741 | gctgctatatt | tcctcaaggc  | aatccatcaa  | cttaatagggt | atattgttta  | cactactcat |
| 28801 | cttcgtagtc  | aggatattgt  | ggaggagcct  | ctccttgctt  | tttagtaact  | tttggatatc |
| 28861 | ttgttccagc  | ttctgcttca  | ataatgccac  | aacattctac  | taaaaaattcc | caattatcgc |
| 28921 | cataatcaaaa | aagaaaaaatc | attttttttat | ctgggtcaaaa | aaccttgtag  | atataagaat |
| 28981 | ttttgacgct  | tttttcatta  | ggcataaaact | ataatcagta  | ttataaaaata | aagtgtatac |
| 29041 | ttcattactt  | tcataaaatat | cgttttatgtt | actataaaaaa | ccaaattaat  | gatctaactc |
| 29101 | aaaactaaag  | accttttatga | tagtttctgc  | aaattttataa | agacagcttt  | caattccatc |
| 29161 | tcacggtaga  | tttttttgct  | tagagaaaact | ttaaataagt  | atactttctt  | tttcttatcc |
| 29221 | acttaattta  | tctttaactt  | acattaaatt  | aaccaatagc  | aaaaaaacaa  | cacaagtcaa |
| 29281 | acataacctt  | acccacatat  | cttaccctat  | tcggactatt  | aggagaaatg  | ctatacttta |
| 29341 | gaaaaagctt  | aactgaactt  | tcattcgttc  | tgacaacaca  | tacttacttt  | taatgaccga |
| 29401 | tgatatggtc  | gttgctggaa  | ataggcgctt  | ttaggccttg  | aagatgactg  | tttactttcg |
| 29461 | gcaaatcgtc  | taaatcatgc  | tctatTTTTT  | gtgtttccat  | ctcaaattta  | aatcccaatt |
| 29521 | tttcacagaa  | tttttgaaaag | tattctctaa  | taatagagag  | caagttttcta | tctccttctt |
| 29581 | tataatTTTT  | taattccttg  | ggaacagtga  | gtgataaatt  | accgtcttta  | taggttacac |
| 29641 | catctttttc  | atcttgagac  | tcaagtgtaa  | attccagtga  | ggtggataga  | ccacatatTT |
| 29701 | tttcccctgg  | attatcaaat  | ttgattacag  | gtatttccat  | atcagacttt  | actcttatgt |
| 29761 | tattatggtc  | agtgtaatca  | atattcatta  | ctttgtcagg  | gtcttgcggt  | gttaatcgat |
| 29821 | aattgctaag  | tgcagagtga  | tattcaataa  | atataacctgc | taagtatcct  | gcttgattac |
| 29881 | aattagtaac  | tagttcttct  | aagatagggg  | cactcggaac  | ttctgcttca  | gcataattta |
| 29941 | acatttcctt  | aaaaacttcc  | tttacaagt   | gtcggtagtt  | cttattctca  | tctcctactt |
| 30001 | tgagtaatat  | atgcatatgc  | tctcttccag  | cattgtaaaa  | tctctcaaaa  | tctctaccgt |
| 30061 | acgaattggg  | tttctgataa  | tcagggaattt | caggattttc  | acaatgactt  | tcccacaatt |
| 30121 | cacttaacgc  | gttatatgca  | agttctTTTT  | caagatcctt  | aaggactgaa  | ttacaaaaag |
| 30181 | ccctgccatg  | atctttatct  | atctctcttt  | gttttttgct  | tgcggttcca  | gcgctatata |
| 30241 | tatcataact  | attaaaaagg  | ttgctttttgc | gatattttcgc | tccttccatt  | aacacagagg |
| 30301 | ttaaaactgt  | atctataatc  | tttccattaa  | taacaaaagt  | cattcttggg  | agatcgaaat |
| 30361 | acattgtttc  | accagagtgt  | gctgatttat  | tgcctctgcc  | agcctttaat  | ttactaaagc |

|       |             |             |             |             |             |            |
|-------|-------------|-------------|-------------|-------------|-------------|------------|
| 30421 | taaattcttt  | aattttaacc  | ttcaacgtaa  | ctattggatt  | tgcttctgtc  | atagtccgta |
| 30481 | cttatttaaag | cccctaaact  | tgattataac  | ataagaacca  | ttaatagatt  | attaacaaca |
| 30541 | cctaaacgca  | acaaaggcct  | tacaccatct  | gtacaacaaa  | tacgcaaaga  | caatagaact |
| 30601 | ttattatatt  | ctatctataa  | tgattcaaaa  | tagcaagcct  | caaactagaa  | gcctgctacc |
| 30661 | acttactggg  | tactttacat  | caatcttctt  | gatgtgtttc  | tctgacttag  | gtatggttac |
| 30721 | atgtaatact  | ccatctgaaa  | aactagcaga  | tactttatct  | cgctccacat  | ttactggaag |
| 30781 | ctgaatagac  | ctatagaaa   | agccatagta  | cctttctcga  | tgataaaaact | gcttatcttt |
| 30841 | tgactcggtt  | tcacatgtct  | tttcaccctt  | cactattaag  | ctatcgccag  | atatacta   |
| 30901 | atctatgctt  | tctttggaaa  | tacctggtaa  | ctctaatag   | aggcaatagc  | tttcctttgt |
| 30961 | ttcataaaa   | tcacaagctg  | gtaatagact  | gttgcttctt  | ctggaaagct  | ctggattcca |
| 31021 | tcctgtaaag  | aagctatcaa  | atatgtcatc  | aacggccctt  | tgtaaccctc  | ttacactaaa |
| 31081 | gttatcacgg  | ttattgtttt  | tatttgaaatg | aactatatta  | ctcatgtttg  | acctcctttc |
| 31141 | actaatatgt  | gcattatgta  | atcattccac  | ttgttagttt  | caatacctta  | taccaaata  |
| 31201 | cataaataag  | taggcaaata  | actcacagaa  | caaatagttt  | tgatcgaact  | ttccgtaata |
| 31261 | ttacgaatga  | atgcacatat  | agtatcctcc  | aataaactaa  | taccaattcc  | taaaaataaa |
| 31321 | tagacaaata  | aagaaaaatt  | tctaaaatag  | aacaatttaa  | gaattagtga  | ggagttagtg |
| 31381 | caggaaaaag  | taaagcaata  | ggagaagaat  | gatataataa  | gtgtaacctg  | gaattaaaga |
| 31441 | agcacggaat  | aagaggagag  | ataggaagaa  | gattacaggc  | aataatatct  | ggaaaagaat |
| 31501 | atggaataac  | aaaagtgtgct | caaataatcc  | gaattactag  | aactacattg  | atgaagtgga |
| 31561 | ttacaagatt  | taaggaagga  | ggagtcgatg  | cgtttaaaa   | acaaccagga  | cgtggagtaa |
| 31621 | agccgaagt   | gagctacaag  | cagcaagaag  | aaattaaaaa  | tgtcatagca  | gaagaaggag |
| 31681 | ccaacctaac  | ggctaagaaa  | ttaaaaatca  | taattgagaa  | aatgttttct  | attgaggtaa |
| 31741 | gtaagtctac  | agcacatgga  | ctgatgcaaa  | agttaggttt  | ttcgtatatt  | actccaaggc |
| 31801 | ctgtgcacaa  | taaacaggat  | aaaaataaac  | aagaaaagtt  | taaaaaaaaa  | tcttaatgaa |
| 31861 | actattgtca  | cgtatcccga  | aaaagagcta  | tttttcttcg  | atgaatcgcg  | gtttggcaca |
| 31921 | cattcaaaga  | ttggacacgg  | gtggttttaa  | aaaggcatta  | ggacacagg   | taaggtgaaa |
| 31981 | ttaggtaggc  | aaaactttta  | tctctatagt  | gcagttaatc  | ctagaaatgg  | agagacttct |
| 32041 | agttttattcg | caccaaacgt  | caatactgat  | tgtatgaata  | tattccttga  | gcagatgtca |
| 32101 | caatattttag | gaacaaggga  | ggcatttctt  | attgtggatt  | gtgcaggatg  | gcatagatcc |
| 32161 | aaagggtttaa | aaataccaca  | aaatattacc  | ttaatctact  | tacctccata  | ttcaccagag |
| 32221 | ttaaattccag | tagagcgttt  | atggcaatat  | ttgaaagaca  | atctcattaa  | aaatagaata |
| 32281 | tatgactctg  | ttagttttatt | ggaggatact  | atatgtgcat  | tcattcgtaa  | tattacggaa |
| 32341 | agttcgatca  | aaactatttg  | ttctgtgagt  | tatttgccta  | cttattttatg | atatttggta |
| 32401 | ttatacctaa  | atttttggatt | agtataaaaa  | aagctagagg  | aagaatggac  | tatggatttg |
| 32461 | tcgaattgga  | ctttgaatac  | ttgatattct  | ctttccagat  | agattgaaaa  | cgaagtgtga |
| 32521 | taaaaaatgc  | tgctttgaat  | ggttattttt  | gaaatatattg | agcctgattt  | ttaaattccc |
| 32581 | ctttcattta  | ctaactgatt  | gcaataagct  | tctttcataa  | agctagatgg  | aacatatgat |
| 32641 | ttttctattg  | tacaatctga  | ctgtttcata  | gttttagcta  | actcttcaga  | aacgtcactg |
| 32701 | tttattttcaa | aataaccatc  | ttctatgcct  | atagaaacat  | tttttcctcc  | taaaagacag |
| 32761 | ctccccctta  | aacttgattt  | atcctccaac  | ttactaaaac  | gtgctatgct  | ttcttcgttg |
| 32821 | gcgagcttta  | cttctatttt  | attattatct  | ctatcactag  | gagataaata  | aacactgacc |
| 32881 | ttcccaaagt  | aagtagtaaa  | agacatttca  | attctaccct  | ccgaaatgtc  | ggtgtaattc |
| 32941 | ctaactcctt  | cttcattttc  | aactctaact  | atactttctc  | caacttgaag  | cataccaatt |
| 33001 | tccagaccta  | aatttttagc  | ttttttattg  | ttgaatatct  | ttgcaacttc  | gacaacacta |
| 33061 | tcttttggat  | atttttatata | aaagtgtcca  | ttgtccatct  | ctaactcaaa  | atcatgatca |
| 33121 | tcagtttttta | cacttacgtc  | tacgataact  | ttgtacacca  | agtccttaag  | ttctaaaagt |
| 33181 | attttttctc  | gttgatctag  | agcgtatcta  | tctgagcaaa  | ttatgttcac  | gaaatcgcca |
| 33241 | tgttcttcat  | cgctaaatct  | atttaaagac  | gcacctcttg  | atactatttg  | caatatcttt |
| 33301 | ttctcatcta  | aaaatccata  | aattcgggta  | gtatcgtaag  | aaaaatatag  | cttttgcaat |
| 33361 | gtatcaatta  | tgcgatccac  | taaagatata  | ttagctttat  | acggaagagt  | gaacattact |
| 33421 | ctttgtttca  | gcgcctcgct  | tacaatttta  | tcaagtcttt  | tattgcactc  | ttcataatcc |
| 33481 | tcttcattac  | catagttacc  | caaagcatcc  | aattcatcat  | gaatattatc  | tattttttgc |
| 33541 | caaatacttt  | catatttttc  | tctttctctt  | tctcttaatt  | ttacttttgc  | taaggaaaaa |
| 33601 | gaatcttttt  | tacgtattat  | gtttgcattg  | tagactagtt  | gaccgtagg   | cctaccaaca |
| 33661 | atttcatcat  | aatcaaagca  | atagctaaca  | ttatagtac   | tttcactagt  | tgattcctga |
| 33721 | tcattgctac  | tttcatcgtc  | atctttattc  | catacttcaa  | tatcgtaatc  | agtgttttca |
| 33781 | aggtttttgt  | cttcacttgt  | tcgataatct  | tgattgtttt  | ctactttttc  | gtacagccag |
| 33841 | gttgattttt  | gatcatcgct  | actttcatcg  | tcatcttcat  | tccatactcc  | aatgtcgtag |
| 33901 | ttagtatttt  | taggtttttt  | atcttcacct  | gtttgataat  | cttctgcttc  | tctatatagc |
| 33961 | catattgatt  | cctggtcac   | attatcattg  | atacgctca   | tttccacttt  | tgttgtagac |

|       |             |             |             |             |             |             |
|-------|-------------|-------------|-------------|-------------|-------------|-------------|
| 34021 | tgaggtctta  | ctatctcttt  | tcttacgttt  | tctttgttta  | attcatcttc  | aagagacact  |
| 34081 | tcattactaa  | tatagaagtt  | tttctgtttt  | aaactctcat  | tttcattctg  | caatgaacta  |
| 34141 | aattctgcaa  | acagttcttc  | acgctctgat  | aaataaacat  | agagctggcc  | tattacatca  |
| 34201 | ttaagttcct  | tatctttttc  | taatatctgg  | ttttcataat  | tactcttcaa  | atcctctata  |
| 34261 | ctgtctacca  | gcactacact  | ttcttttctt  | agtctacttg  | agttagattc  | aaccaaattt  |
| 34321 | aacctttgct  | gtaactcttc  | atcttttttg  | tctatcatct  | gtatttcact  | cttcataatc  |
| 34381 | tctaatttgc  | tgtccaagtt  | ccctattatg  | tcatttttat  | tcttcacgtc  | caataatact  |
| 34441 | ttttctattt  | cttggttttag | ctgttcaatt  | tcttgcccat  | ttttagttaa  | ttctcttggt  |
| 34501 | tttctttgta  | attgagcttc  | aagctcttta  | atcttctttt  | ctaggatctg  | atctttcttg  |
| 34561 | ctgagctcac  | tcacttcttg  | atcatactct  | tccgctatac  | ctttatagca  | ttccaagagc  |
| 34621 | ttttcatttt  | tcttgagatc  | aaagttttct  | tggtgcagcc  | tttctatttc  | accatctgaa  |
| 34681 | ttatctatta  | cttggttacc  | ctcactacca  | atctcaaata  | tctcttcaga  | agtaatcgta  |
| 34741 | aaatctttta  | atagcgaagg  | caaagtagtg  | tcttcaaggt  | tattactatc  | aatgagtta   |
| 34801 | tattgtacta  | cctgccttga  | actaggcata  | cttatacctt  | tctattaaca  | aaggcacaca  |
| 34861 | atgcattata  | tttactatat  | acgcaactga  | tttaaacata  | atctattttac | taattcatat  |
| 34921 | tgtgaatttt  | tataaaatag  | gtttatatgc  | aaaatattat  | aataacgtta  | aagcacgtag  |
| 34981 | ctaataccat  | tattagtaca  | gtataaaggg  | cctttttgcc  | tataattgaa  | gagttaaagc  |
| 35041 | aaattcataa  | tatacctcat  | ttatcttcta  | ataacgaaaa  | tttgtatcga  | aacagataag  |
| 35101 | accataagta  | tgaaattcaa  | agaggaatga  | atcagttaaa  | tcaagaatag  | atggtgtggt  |
| 35161 | atagtagtga  | ttatgctaatt | tattgggtcg  | tttggttaaa  | aggtaattgt  | gaaaaggggt  |
| 35221 | aagaatttga  | ctgaagataa  | aaaattagca  | tctgatattc  | taaaagaggt  | tgcaggtagt  |
| 35281 | ggtactgctg  | atagtataaa  | agtacatttg  | tttgacatta  | aaacagcttt  | acaagaacgt  |
| 35341 | ggttttggta  | ttttaataat  | catcttctcc  | ttgcccgtat  | cggtgcctat  | accggttcca  |
| 35401 | cctgggtata  | caactattct  | ttctatacct  | ttaatcttgt  | tttcattaca  | acttctgctt  |
| 35461 | gggtttcatt  | ctccctggat  | gccacgttgg  | ttggaaagga  | aatcctttta  | acgttcaaca  |
| 35521 | ttagcccttg  | tggttaaaaa  | aactttacct  | gcattaaaaa  | aaatagaaaa  | gttcatgaaa  |
| 35581 | ccgagaatgt  | cttttatctt  | ctgtgggcca  | ggtgaaaaga  | ttttggcatt  | tataatgctg  |
| 35641 | gtttgcgtat  | tggtgatagc  | caatccgttt  | ccgttgactc  | acttcattcc  | agcaatcggg  |
| 35701 | acgactctta  | tttactttgg  | tattatgaat  | aaagacgggc  | ttgtctcgat  | acttggagtg  |
| 35761 | ttggtatcct  | tgtgtggaat  | attattttgct | cttattgtaa  | tagtaaaaagg | tccacagctt  |
| 35821 | ataattagtg  | cgttttcttt  | tctcaagagt  | tttgcatagc  | gttaattcttg | agctattagc  |
| 35881 | aaattagata  | ttctatagaa  | ataccatggc  | aaccagtgtg  | gaagcaaatt  | cttttgttta  |
| 35941 | ctgtttgtgt  | ctcaaaaagca | taaaaaagta  | cgtactgttg  | tgagaacaat  | ttaaacaaaa  |
| 36001 | gcggcgtttt  | aaaagtaaaa  | gcttggaatt  | tttacaacaa  | agttaggcaa  | aacagttcat  |
| 36061 | atgtagatth  | agcgaaaagta | aggcaatata  | ggtgatthtca | gcgtataata  | aatcaccat   |
| 36121 | ataaaaaagt  | tcgtatgtat  | cgtttggaag  | accatcccat  | cccaaagaaa  | aatgttctca  |
| 36181 | cgggtagcgg  | tttttggtgc  | tggaaatggg  | tggattatth  | aagttattag  | caatatataa  |
| 36241 | tactaaatta  | atagtaattc  | atthtgagaac | aaaaagaaaa  | atthtatgata | atthttacatt |
| 36301 | tcaaatggat  | attgttcttt  | ttataaaaaa  | tattcctata  | ctatgtaagg  | tcaagttcta  |
| 36361 | atcacatcaa  | tttttcttcc  | aaattaaatc  | ttatctthta  | cagtggatct  | tacgtthtaa  |
| 36421 | ttatthttata | tccaaaatta  | aggaagttat  | tctaaacggg  | acacaacttc  | agcatctaaa  |
| 36481 | gctagctgat  | tttaagaaaa  | tatcgctctc  | atgaatgtgc  | tttacggaca  | aaagctthtat |
| 36541 | taatatcttc  | tatatatttg  | ttataaaaca  | accccccaaa  | aaaaatatgc  | agaaataaat  |
| 36601 | taaaagaccc  | attacaacca  | acgcgtaaat  | atggagtaaa  | gaaataacttc | attcacctat  |
| 36661 | taacctctac  | ctactgcctc  | taccattgct  | atgatcataa  | actctatttc  | ctccatcaat  |
| 36721 | ttcatccaat  | acagattgcy  | gacaaaaatc  | aattgatatc  | actctthtct  | cgcctaattg  |
| 36781 | caatgctccc  | ccacctccac  | gctgtggata  | ttggagttct  | aaaaattgta  | atagtaattg  |
| 36841 | atcaatthtca | tgttgaaattc | ctggacgacc  | ttgaatcaat  | ctacccctag  | gagaagatag  |
| 36901 | agaatcattt  | tgggaataatt | gtgaaatatt  | tcttctccga  | tttctaaagt  | attgttcat   |
| 36961 | tctttgaggt  | tgtctagtgt  | cattthccaat | tcttgcaacta | agaagaccac  | gtatataacc  |
| 37021 | tataatacct  | tcacctthtct | ctccaaagtt  | actatthtccc | tgtaaaagctt | gatcaatagc  |
| 37081 | ttggttaata  | tccctagcat  | tttctgtatgc | ccatatgcca  | caattatggc  | catctgtttg  |
| 37141 | ctgatgaacg  | gaaacatcat  | ggacattatc  | atcgctaata  | tcacattctc  | ttaaagctcc  |
| 37201 | tcgaatatta  | ttgtcaatac  | gactatctgg  | accaagtga   | tcagcataat  | acccataata  |
| 37261 | atthtccattt | tgggtggacaa | taactaatgt  | aacccaatga  | cgattaccta  | cattaataat  |
| 37321 | agcagttaat  | ctatctthttt | cacccgaatc  | tactthtttgt | ttaaagttat  | ctatgttact  |
| 37381 | acttaataag  | tccctacctg  | ttggatcatt  | ttgatthtcca | tcgactccta  | ctgaagttat  |
| 37441 | tgcaaaatca  | tgacgatcat  | tagttggatt  | agatcgatca  | tcattggaaag | tatatgtctg  |
| 37501 | tgcagcgaaa  | aacatgtcat  | gagcttgtag  | ccaataacgg  | aaatthttgat | tttctgttgc  |
| 37561 | aaagtctagt  | gcaagtagat  | tatgcacatc  | ttctatthtca | cgagcgthgt  | ttctacgaag  |

|       |             |             |             |             |             |             |
|-------|-------------|-------------|-------------|-------------|-------------|-------------|
| 37621 | gatagtgttt  | atattgttgta | atattccttg  | tgctgtagaa  | gtaccacctc  | cccttattct  |
| 37681 | tgaccttaat  | gtttctattg  | cctgtgctct  | agtaccttgc  | aagtaactaa  | atggaacgtg  |
| 37741 | cagattatca  | tctatatcaa  | gcaaaaaaat  | cgagttctgt  | cctgggtcttt | tttccatgta  |
| 37801 | aaagcgcctg  | aaattttcac  | gagtttgatc  | tgacaataga  | ttttctgggtg | gattttcatc  |
| 37861 | aataacactt  | tcaggtccca  | ctaatacttc  | tggtcttgag  | tcatgaccac  | gacgatcaag  |
| 37921 | tctatgtaca  | tacactgctt  | gttggtggaag | agatataaag  | tcttctgctc  | tctgtgcacc  |
| 37981 | tctattaaat  | acagcataag  | acaaaaccac  | ctcatttcca  | gaagtaatag  | gcaaatatcc  |
| 38041 | cctttgtttg  | ctcatcaatt  | ctgttatttt  | gtaccttgcc  | tcgtcttgct  | cctgttctac  |
| 38101 | ttcttctgca  | ttatcagcaa  | atcctaatac  | atatccaatt  | gggtgagtat  | ctgctgtagg  |
| 38161 | ttgtcttaat  | aatagaagac  | ctagtctctg  | ttctgtaact  | cttgtaagta  | ttaccctttc  |
| 38221 | tccttcttct  | tcctgccacc  | tttttaaact  | atatgtttga  | ccaactttat  | acatagcaag  |
| 38281 | cactttataa  | ggattatcac  | tagcataaaa  | tgtaccatgt  | agtatagagc  | gaaacttatc  |
| 38341 | tttgctattt  | acatctatta  | tcatattgcc  | atgcgtatct  | tctggcatta  | atactgcaga  |
| 38401 | aatgttttcta | aataattctt  | gatgctgaaa  | tctatcttgc  | cagccatcat  | tcataacttg  |
| 38461 | atttaaagca  | ttatacacat  | ttccagcatt  | aggcacttgc  | acaagattac  | caccaagaaa  |
| 38521 | attatttgca  | ttattatttt  | ggtaattgtg  | atataaacca  | aggttatctg  | tatgaatatt  |
| 38581 | aaggccaagt  | tgattattaa  | gtgtgcatga  | aacttcccgt  | acatgaacat  | tatttccgtc  |
| 38641 | aacattaaga  | tcttgtaaatt | tgatggctcc  | ttgttgtaga  | gcgttgttat  | ctctaataatg |
| 38701 | aagtataact  | atatcagaac  | cttgagtatg  | gaagaccatg  | gttaaagcat  | gattctcatc  |
| 38761 | accatatcta  | aatatatact  | ttcttacacg  | ttgttgaact  | gcgtttgtac  | taaaggaaac  |
| 38821 | ctgccctgtt  | gaagccctac  | tgtatcaacc  | ctaaaaggaa  | ttcgatttaa  | attaaaattt  |
| 38881 | aatccaacac  | agacagtatt  | tcttgattca  | gtatggatag  | gtataaatga  | agaattgtgt  |
| 38941 | aaccttccag  | cgtagcctat  | ggcacagttt  | aatgcaacat  | ctgacggtgt  | gtcaaatata  |
| 39001 | gcaagattaa  | taacaatagg  | aatattttct  | ctttctgctt  | gatgatgtat  | aagaaatgca  |
| 39061 | acatgtgagt  | ttctaggaga  | taagtcaaga  | tcgatgccta  | ttgtgtagcg  | atgactaaaa  |
| 39121 | tttgctaaaa  | aacctaaata  | aaaccctgta  | ctctcaaatt  | tttgattgcg  | attttcaata  |
| 39181 | ttatttttcta | gcgcttgtct  | gcaattatca  | tagatgtcag  | ttatatatgg  | caaaacttcc  |
| 39241 | ctgtgcattc  | tacgttctac  | attttgtctt  | tggttatttg  | ctagtatttc  | cataaagttg  |
| 39301 | tcaatccttt  | gttgaccttg  | tgctacctgt  | gcaaaattga  | ctgatctatc  | aagttgtctg  |
| 39361 | agctgatttt  | gattgagttg  | tcttcctttt  | atttcctgaa  | ttgtcaatct  | gtgatctcct  |
| 39421 | aagagttgtc  | taagaagact  | aatctcagat  | gctgaatatt  | tggcaaattt  | atctctaccc  |
| 39481 | ctaaaatcct  | tttcacgaat  | cacctcgaat  | actgttgcaa  | ttgcctctcc  | ctgactcttg  |
| 39541 | cctttttccat | gcatgcatac  | tttatattgc  | tcaaaatcta  | ggtctccttc  | ccttaaattct |
| 39601 | ggatttttgct | gtataatctt  | ttgtattaga  | gcattttctct | cccttggtact | aaaccttaac  |
| 39661 | ccatcactgt  | tagggcgatc  | agaaatgctg  | taacacttga  | caactcgctg  | tccgtcacga  |
| 39721 | ctacgagtta  | aaacagcaac  | ctttaagttt  | cctgtatttc  | tattcctacc  | acctgtatca  |
| 39781 | ataccatgat  | tatcaaaacg  | aaaatagact  | ctctcatttg  | catccaagat  | atcagcatca  |
| 39841 | tgtgcagtag  | caaacatgct  | aaaaaagaat  | acaggaagga  | aacgacctgc  | acttacatga  |
| 39901 | tacaagaaag  | atggacattg  | atctaaaaaa  | gattcaaatc  | cttgtctgaa  | tccttcaaga  |
| 39961 | tctccatcca  | ccaaactcct  | aataagtcca  | tcaccattac  | tcatacaaaa  | tacccttat   |
| 40021 | ttactacgac  | cagaaacacc  | aagagttcat  | aagtagatta  | cttattacca  | ctaagcgtaa  |
| 40081 | agacgctttt  | tttcttataa  | gaagaaacac  | cacttacact  | aggagttcca  | agctcagact  |
| 40141 | gcggaccatc  | atcaactggc  | aaagttgttt  | ccttactacc  | atgagcttta  | gatcgtgacc  |
| 40201 | gtaaattatt  | ccaaggacca  | tcacctacag  | gaccaagagg  | tagagttggt  | ttctctaact  |
| 40261 | cagagaataa  | ctcttctgca  | aacaaaccgt  | aatctacgta  | atccttcatt  | ccttccttac  |
| 40321 | cgcataatct  | aagggttttt  | attatctttt  | ccttaaagaa  | ctcaaacttt  | tcaggaaagc  |
| 40381 | aatcttttagc | aaataatatt  | acatctaata  | tttctttttt  | ctctacttct  | ttttcctcat  |
| 40441 | cagacttata  | aatgtcttct  | cgtttccagt  | taattattaa  | ccctgcaagc  | atgtcctgta  |
| 40501 | taggaactat  | acaattagaa  | atattaacag  | aaatctttct  | gtattcaata  | aagcagtcac  |
| 40561 | atttccaaat  | cttcataata  | agagatctag  | cttgaacatt  | tgattcagga  | tttttcaaca  |
| 40621 | ttacatttga  | aagtgagtaa  | agaaggaggt  | catactcatc  | ctgtgagagt  | atttcctttg  |
| 40681 | aatgatcacc  | tcgtgctgaa  | gcttcctcat  | aacaccagca  | ctgtacccaa  | tcatgaaccg  |
| 40741 | tatcaaaaaa  | acatgactct  | attaattcag  | caaaaaggga  | atatattcct  | ttatctttct  |
| 40801 | gcgataatth  | ctgtaaaaaga | gtatctttat  | cagctatatt  | ccttacacaa  | aaatctaaaa  |
| 40861 | taggagcatc  | tttctcaaca  | gattgaggac  | gagaaaagagc | aataatagct  | tctgtaagct  |
| 40921 | tcttctcttt  | atcttcttct  | tttaaattgat | tataaaaaata | ctctactccc  | tcactccacc  |
| 40981 | taagtttttac | agcactgtca  | aagccttcta  | ctgcatcata  | cttctttta   | tccccagatt  |
| 41041 | ctctatcgat  | ccagaaatca  | aatacaggac  | ctttccttcg  | aatgccaccc  | aaaagcgagt  |
| 41101 | ttcgtatgta  | ctcatcagtt  | ataggattac  | ctctactatc  | aagttcatca  | gaagaaaatc  |
| 41161 | cattttttgta | ggattcaaat  | gctttttgaa  | agagtggatg  | aatttttatct | accacacagt  |

```

41221 aactacaagc catctcatat ttgcgaagtg gattatctat tccacctatt ttttcttcag
41281 taaacctttg acctaaagca gcattatcca accttacacc tgaccagcaa ccttcacctt
41341 ggaatacatt gtgcaaaaac ttcaacttat cacccttaaa gtattttatg tgctccataa
41401 agttatcttg aaggactccc acccatctct tgatagctga cttcctcccc gcagcaactg
41461 ctggatctgg atgtttaata gcttcctgta attttttgga catcgtagcc cgaagctctt
41521 tctgtgttgg cattaacccc tcctatcccc tcctattaag tatttatata aaaaaggcat
41581 tgtacataca ttagaatgga ttgcaacata aaaattacta gaatagagga cttaataaaa
41641 aaaacgttat ggctaaaact tttcttcttg aatgtcctta atgtaatcaa tagaaaggcc
41701 gatcatttta gctataacat ctatagagac accggcctta agtgaattct ttgcaacttc
41761 gattttctct gcttttctgc cttcggctct gcctttttca tgtccgattt ggatggcttc
41821 tctatttatg agctgtatta gctgtggtgt tgtgtagcag attatccaat ctggtgcttc
41881 tctgccattt tcccacttag caaatctcat cttttccttg agataatatc tcctataagc
41941 ttccacagca ctgctgcatt tatactgata cggcagtgtt tgtataaaag cttgcataac
42001 agttgatcga aaaatgagta aatccttatt actatcacac caatttatta cttcctctga
42061 tttatgcttc cttttgtatc gctgtgtata ctctttacac aattcttttc catactctat
42121 caaccaacaa aagtttcctt tcgattgcct agcccacaaa gaacaaggat gattgctgtg
42181 agtgagttta tatggaactt ctatatcctg atctatgaca ctaacaaaag gatttggcgc
42241 ttttaatgct attgaaaaaa cattactcag taactgagca gtttctaata gcatttttac
42301 tatatgctta tcacataaca tttttgccgc aatctctggg ttttcatcta gtacaaagat
42361 gttcatctaa acatccaaag atagaatcag cttaatgtct taatttcatt agctgtaaga
42421 ccagtagttt gagctataat atcaatagaa acacctgctt ttagtagatt ctttgcgacc
42481 tcaattttct ctgcttttct gcctttttca tgtccgataa ggatgccttc ttctctacct
42541 ttttcagtag catcatcaag tttttgagcg aggacagcct gttcatcaag aatacgtttt
42601 atttcctggt cataggcaat aaattctttt tctgaccagt taaatctatt tagttcttca
42661 taggcctttt taattattac atcactacct attatttttt ccagctcttc ttcactagtc
42721 tcatctgcat atttaaagaa gtagatccat ttttcaacta tatttgaaag ctgatcctct
42781 ttggtttttg gaaatttttg caattcaata aatatgaagt aaaaatcttt tagatcgtgt
42841 tcattagtat cttcatcccg aatagtatgc tttgatttat actcagactt gtccggaac
42901 aggatacaat ctgctatagc aatgaagata atttccttaa ggtcttggtt ttgatcacct
42961 ttatcggctt gtcttgaata cgcttttagt gcatagtatt gggcacgttt ttcaaagcct
43021 ttagtttttag cgacctgcat ctcgacgata acttgcaccc catcttcata tctacagaga
43081 acgtcaataa tactttgctt ttttagcagca atatcagggg cttgaatagt acttagaaac
43141 tctatatact ttattgcact tttgtcagtg aagccaagga tatcattgag gaagtgaata
43201 agaatatctt tatttttttc agtaccgaag atacggcgaa aagatatatc atttttgggg
43261 tcgagaaaact tcgaaagagc catgagaaaa aaacctaaaa agcattaata attatacaca
43321 attgtgaaga aatgttcaag ttttttattt ttttaagttt tgaatgcgtt gatgaagaaa
43381 acggctgtca gagatcatct tagaatagca tcctctactt tagacgtcct tttgtacatc
43441 ttttatcaac catgctgtaa agcaccttac aagcccagga aatggatgac aatgaatttg
43501 gagctgt

```

//

```

LOCUS      JAQZAU010000076                10890 bp    dna        linear    ENV 17-MAR-2023
DEFINITION MAG: Wolbachia pipientis isolate wEsol contig_42626, whole genome
            shotgun sequence.
ACCESSION  JAQZAU010000076 JAQZAU010000000
VERSION    JAQZAU010000076.1
DBLINK     BioProject: PRJNA929258
            BioSample: SAMN33142973
KEYWORDS   WGS; ENV; Metagenome Assembled Genome; MAG.
SOURCE     Wolbachia pipientis (insect metagenome)
ORGANISM   Wolbachia pipientis
            Bacteria; Pseudomonadota; Alphaproteobacteria; Rickettsiales;
            Anaplasmataceae; Wolbachieae; Wolbachia.
REFERENCE  1 (bases 1 to 10890)
AUTHORS    Fiutek,N., Couger,B.M., Roy,S., de la Torre,J.R. and Connor,E.F.
TITLE      Genomic assessment of the contribution of the Wolbachia
            endosymbiont of Eurosta solidaginis to gall-induction
JOURNAL     International Journal Molecular Sciences
REFERENCE  2 (bases 1 to 10890)
AUTHORS     Fiutek,N., Couger,B.M., Roy,S., de la Torre,J.R. and Connor,E.F.
TITLE      Direct Submission

```

JOURNAL Submitted (10-FEB-2023) Biology, San Francisco State University,  
1600 Holloway Ave, San Francisco, CA 94132, USA

COMMENT ##Genome-Assembly-Data-START##  
Assembly Date :: JUN-2019  
Assembly Method :: FLYE v. 06-2019  
Genome Representation :: Full  
Expected Final Version :: Yes  
Genome Coverage :: 100.0x  
Sequencing Technology :: Illumina HiSeq; PacBio Sequel  
##Genome-Assembly-Data-END##

FEATURES Location/Qualifiers  
source 1..10890  
/organism="Wolbachia pipientis"  
/mol\_type="genomic DNA"  
/submitter\_seqid="contig\_42626"  
/isolate="wEsol"  
/isolation\_source="galls on Solidago altissima"  
/host="Eurosta solidaginis MN-2018-EFC"  
/db\_xref="taxon:955"  
/environmental\_sample  
/country="USA: Cowling Arboretum, Carleton College,  
Northfield, MN"  
/lat\_lon="44.48 N 93.13 W"  
/altitude="280 m"  
/collection\_date="2018-11"  
/metagenome\_source="insect metagenome"  
/note="metagenomic"

gene 56..436  
/locus\_tag="wEsol\_00913"

CDS 56..436  
/locus\_tag="wEsol\_00913"  
/codon\_start=1  
/transl\_table=11  
/fullproduct="qcoverage 100 , hcoverage 100 , similarity  
100 , identity 100 , evalue 1.16e-87 , alnlength 126 ,  
Bacteria , Proteobacteria , AOV87106.1 transposase  
[Wolbachia endosymbiont of Drosophila incompta]"  
/cog="COG3293 COG3293 124 Transposase and inactivated  
derivatives"  
/pfam="DUF4096"  
/product="transposase"  
/translation="MRKKYPTDLSEREWARIKHFVRSYKKGGRPPKYSKREILEAIF  
YVLRITGCQWRYLPNDFPLWKTVYEQFRQWKKQGIFEKMNYEITKYSRRKIGRNEQPSA  
CIVDSQSVKTTEKGGSKAMMEVKK"  
/besthit="qcoverage 100 , hcoverage 100 , similarity 100  
, identity 100 , evalue 1.16e-87 , alnlength 126 ,  
Bacteria , Proteobacteria , AOV87106.1 transposase  
[Wolbachia endosymbiont of Drosophila incompta]"

gene 547..888  
/locus\_tag="wEsol\_00914"

CDS 547..888  
/locus\_tag="wEsol\_00914"  
/codon\_start=1  
/transl\_table=11  
/fullproduct="qcoverage 100 , hcoverage 100 , similarity  
100 , identity 100 , evalue 1.53e-79 , alnlength 113 ,  
Bacteria , Proteobacteria , AAS13810.1 transposase, IS5  
family, OrfB [Wolbachia endosymbiont of Drosophila  
melanogaster]"  
/cog="COG3293 COG3293 124 Transposase and inactivated

```

derivatives"
/pfam="DDE_Tnp_1_2 DDE_Tnp_1"
/product="transposase, IS5 family, OrfB"
/translation="MRTKYTKVKKMWADMGYQGRNLKNHIKEEYDIDIEIVKRPPCRF
WVHKDTPPELLPTREQGFKVQPRRWVVERTFAWVNRNRRLSKEYDLLTTSTENFIYLA
MSRVMLKREYA"
/besthit="qcoverage 100 , hcoverage 100 , similarity 100
, identity 100 , eval 1.53e-79 , alnlength 113 ,
Bacteria , Proteobacteria , AAS13810.1 transposase, IS5
family, OrfB [Wolbachia endosymbiont of Drosophila
melanogaster]"
gene 881..2593
/locus_tag="wEsol_00915"
CDS 881..2593
/locus_tag="wEsol_00915"
/codon_start=1
/transl_table=11
/product="hypothetical protein"
/pfam="TPR_12 TPR_11 TPR_10 TPR_11 TPR_1 Pfam-B_422
Pfam-B_19818 TPR_2 TPR_14 TPR_8 TPR_7 Pfam-B_7784 DUF2225
Apc3 TPR_12 TPR_10 TPR_1 TPR_8 TPR_2 Pfam-B_17261 TPR_14
TPR_7 TPR_16 TPR_12 TPR_11 TPR_10 TPR_1 TPR_2 TPR_12
TPR_10 TPR_12 TPR_10 TPR_1 TPR_14 TPR_12 TPR_10 TPR_12
TPR_11 TPR_10 TPR_12 TPR_10 TPR_8"
/translation="MLEFTSFRTTSYLDGSPIPQSLLEIFADNQENNPSLETFHEAFG
ILISYSMLTTKKDHSMLIHSLVQEVIRLKSEKSGTKEDIKTVFQLLQKGFYPYHSDKL
EDYAKKRQLLPHEAFLSHMDNLLEKNSSEKQTIEKDYLDDLLMWINDGYSDLGNPKR
QKELIEWILPILQRHFIPDYEIATLLVSLGAIYNALDNPRNAKELFEWALPILEKYYG
SDCPKVAVALTNLGNAYEDSGNPHKAKKLFEWALPIFEKHYGSDHPKVAVILTNLGHA
YENLDNPRRAKKLFEQALAIQEKHYGLDHFEVAKLRANLGLVCYALGDLQAKELSER
ALPIFEKHYGPDHLEFAKLLSNLGVYGGGLGYHKKRKRLLERALAIAKRKHYSRSDHFEV
AILLVNLGIAHNALGSSQKARELLERALPIFEKHYGPDHPEVAKLLVTLGITYGILGK
HKKNQELLKRALPVFKKHYPDHPEIAIILISLGISHGDLGDHEKQKELFEQALPILE
KHYGPDHPEVATLLINLSDAYGALGNHKKQKELFARASSIFKKHYGPDHPEVAKLLAE
LDDI"
/besthit="qcoverage 39.8245614035088 , hcoverage
39.8245614035088 , similarity 100 , identity 100 , eval 8.63e-128 , alnlength 227 , Bacteria , Proteobacteria ,
WP_155968571.1 MULTISPECIES: tetratricopeptide repeat
protein [Wolbachia]"
gene complement(2634..3806)
/locus_tag="wEsol_00916"
CDS complement(2634..3806)
/locus_tag="wEsol_00916"
/codon_start=1
/transl_table=11
/fullproduct="qcoverage 100 , hcoverage 100 , similarity
100 , identity 100 , eval 1.79e-263 , alnlength 390 ,
Bacteria , Proteobacteria , WP_155968569.1 MULTISPECIES:
2-oxoglutarate dehydrogenase complex
dihydrolipoyllysine-residue succinyltransferase
[Wolbachia]"
/cog="AceF COG0508 404 Pyruvate/2-oxoglutarate
dehydrogenase complex, dihydrolipoamide acyltransferase
(E2) component, and related enzymes"
/pfam="Biotin_lipoyl Biotin_lipoyl_2 E3_binding
2-oxoacid_dh"
/tigr="TIGR01347 sucB 404 dihydrolipoyllysine-residue
succinyltransferase, E2 component of oxoglutarate
dehydrogenase (succinyl-transferring) complex"

```

```

/product="2-oxoglutarate
dehydrogenase complex dihydrolipoyllysine-residue
succinyltransferase"
/translation="MSKIIEIRAPKTLGGESVTEGIVKIKKGIGEAVKVDDLIFEIET
DKTALELTAEASGQITEFLVKEDDVISPDQLLAKLSVGEVKEEARKEDKSESAAKKDA
PSARKIMEENAI SAESVKG TGMGGRITKADVIGHMNAEQPAIKQYELPKSIVSGEQR
EERVKMSKIRQVIAARLKASQNTAAILTTFNEIDMKNVMDLRACYKDAFEKKYGIKLG
FMSFFIKA AVQALKEIPEINAEISGDEIIYKHYYDIGVAVGTDKGLVVPVIRSADQMS
FAEIELTLVALGKKAREGKLQVSEMEGATFTISNGGVYGSLLSTPIINPPQSGILGMH
SIQNRPVAVGNSIEIRPMMYIALSYDHRIVDGKGAVTFLVKIKNYIEDPNRLVLEV"
/besthit="qcoverage 100 , hcoverage 100 , similarity 100
, identity 100 , eval ue 1.79e-263 , alnlength 390 ,
Bacteria , Proteobacteria , WP_155968569.1 MULTISPECIES:
2-oxoglutarate dehydrogenase complex
dihydrolipoyllysine-residue succinyltransferase
[Wolbachia]"
gene complement(3940..5586)
/locus_tag="wEsol_00917"
CDS complement(3940..5586)
/locus_tag="wEsol_00917"
/codon_start=1
/transl_table=11
/pfam="Resolvase Recombinase Zn_ribbon_recom
Pfam-B_11632"
/fullproduct="qcoverage 100 , hcoverage 100 , similarity
100 , identity 100 , eval ue 0.0 , alnlength 548 ,
Bacteria , Proteobacteria , WP_213863523.1 recombinase
family protein [Wolbachia endosymbiont of Ceratit is
capitata]"
/translation="MITVALYARVSSKSQAQNNTIESQIAELKHRIAADKHELLNEYE
FKDDGLSGWSLEREGLDALRDKVGEDQIDKIYIHSPDRLSRKSAHQMILLDEFKAGV
EVIFLNHKTENNPESKLLLGMQGLVAEYECTKIMERSRRGKLHRAKKGCVSVIGIAPF
GYNRIKHVDREKTKFEINEEEAKIVKQLFMWVGQERISIREVIRRLRDKSIRTRTGKK
VWCPIIIWKVLRNPAYKGQAAFGKLKRVERRERNKQKVSICRTDEDSWIYIPVPKIVD
EGLFNKVQKQLDENRKRARMQREGGKKKYLLQGLVVCQNCGYAYSGAQCGVEGKKFSY
YRCSSTIRITDGREKCTNKLVRTDMLETAIWEKVKNLLKNPEIIKNEYHRRIAENKND
ESSDKKFARRENQIKQGIEKLME DYYSQENVGDKGYISEEEFKQTMKGMRRERLRGIEE
EKKKVVDQKAIEKGMNLIINSIKSLYSSVKS NLEQLDWQTKRGI IKA LVERIQIGYDQ
VEVAFRIE EPAQDGEIFNLQHCTGRHDKGAGEACQGIFMT"
/product="recombinase family protein"
/besthit="qcoverage 100 , hcoverage 100 , similarity 100
, identity 100 , eval ue 0.0 , alnlength 548 , Bacteria ,
Proteobacteria , WP_213863523.1 recombinase family
protein [Wolbachia endosymbiont of Ceratit is
capitata]"
gene complement(5877..6338)
/locus_tag="wEsol_00918"
CDS complement(5877..6338)
/locus_tag="wEsol_00918"
/codon_start=1
/transl_table=11
/fullproduct="qcoverage 100 , hcoverage 100 , similarity
100 , identity 100 , eval ue 1.32e-81 , alnlength 153 ,
Bacteria , Proteobacteria , WP_155969317.1 MULTISPECIES:
ankyrin repeat domain-containing protein [Wolbachia]"
/cog="Arp COG0666 235 FOG: Ankyrin repeat"
/pfam="Ank_4 Pfam-B_10896 Ank_5 Ank Ank_3 Ank_2 Ank_4
Ank_5 Ank Ank_4 Ank_3 Ank_5 Ank_3 Ank Ank_2 Ank_4
Pfam-B_6944"
/product="ankyrin repeat
domain-containing protein"

```

```

/translation="MVKLGKKDKSLLSENSFKNIYERDEKGR TALHYAVEVKT VRL LIE
KGVDVNAADV RGH TALHLAITEKRLET VRELIESGGNVNAEEYGNKCTPLHLACMVGE
KEIVEELVKAGAEIEQADKFGITAMDYAKNSKEIAEVLKKETEKMESLLKK"
/besthit="qcoverage 100 , hcoverage 100 , similarity 100
, identity 100 , eval ue 1.32e-81 , alnlength 153 ,
Bacteria , Proteobacteria , WP_155969317.1 MULTISPECIES:
ankyrin repeat domain-containing protein [Wolbachia]"
gene complement(6364..7074)
/locus_tag="wEsol_00919"
CDS complement(6364..7074)
/locus_tag="wEsol_00919"
/codon_start=1
/transl_table=11
/pfam="Ank_2 Ank_4 Pfam-B_10896 Ank_5 Ank Ank_3 Ank_4
Ank_5 Ank Ank_3 Ank_4 Ank_5 Ank Ank_3 Ank_2 Ank_4"
/fullproduct="qcoverage 100 , hcoverage 100 , similarity
100 , identity 100 , eval ue 9.89e-122 , alnlength 236 ,
Bacteria , Proteobacteria , WP_213863524.1 ankyrin repeat
domain-containing protein [Wolbachia endosymbiont of
Ceratit is capitata]"
/translation="MSFSKSKFFKEVSSNGFKNINKRNEEGETILHQAVEISDYKTVR
LLIKKGAEVNARDKNGYTPLHCAVFAKSL ENVKVLLRSGAEVNATQYVTGCTPLHSAC
KMGGAGVEIIKELVKAGAEVNQLNKYGATPMYYIWESEKYRLCDSKESEKASKFLREK
GGITKSRELTCYGIEGLVGEIADMLNGSYMPELKIIEIGEIRKRDKSLIKKECQNLAS
KIISQVNAMIDEVVKRKA"
/product="ankyrin repeat domain-containing
protein"
/besthit="qcoverage 100 , hcoverage 100 , similarity 100
, identity 100 , eval ue 9.89e-122 , alnlength 236 ,
Bacteria , Proteobacteria , WP_213863524.1 ankyrin repeat
domain-containing protein [Wolbachia endosymbiont of
Ceratit is capitata]"
gene complement(7243..8403)
/locus_tag="wEsol_00920"
CDS complement(7243..8403)
/locus_tag="wEsol_00920"
/codon_start=1
/transl_table=11
/pfam="Pfam-B_16372 Tail_P2_I"
/fullproduct="qcoverage 100 , hcoverage 100 , similarity
100 , identity 100 , eval ue 2.65e-288 , alnlength 386 ,
Bacteria , Proteobacteria , WP_213863525.1 phage tail
protein [Wolbachia endosymbiont of Ceratit is capitata]"
/translation="MLLPNATKQEKALVDAIDYKVDPSCIRGFKFRLEEETLPWIIIE
EYGLEEILLWVKDKRRAIVEGVKFQRLRGTPKSLKIALKWANIEDITIIEPPGKHFF
ELQVGIKEVPNDFFVDAVVELAKLSLPVRSRLMRIFNDYYNAQRFILDES LFGDLLSD
YSGVKIEKDGPVLSFGRVNFRRFSVTSIKVIESYLRNHYEQTFSNDIYRLDVAVLGET
EPHTKDYKGVYERSHQWYNL KALYPLPQSLLPEIKFAKAQVILSDSWNLEEINACFPV
GSIEEEGNKFVLGNDKLSWQRWNLKHKPILERFSVTHNYKVENYTDQKVRKYVLA EHN
VYYKNDLDSEQKDSIHELEKHILVFYPGVLKWHEHRLHRSWKDSRIISLIS"
/product="phage tail protein"
/besthit="qcoverage 100 , hcoverage 100 , similarity 100
, identity 100 , eval ue 2.65e-288 , alnlength 386 ,
Bacteria , Proteobacteria , WP_213863525.1 phage tail
protein [Wolbachia endosymbiont of Ceratit is capitata]"
gene complement(8403..9203)
/locus_tag="wEsol_00921"
CDS complement(8403..9203)
/locus_tag="wEsol_00921"
/codon_start=1

```

```

/transl_table=11
/fullproduct="qcoverage 100 , hcoverage 100 , similarity
100 , identity 100 , evalue 8.64e-179 , alnlength 266 ,
Bacteria , Proteobacteria , WP_213863526.1 baseplate
J/gp47 family protein [Wolbachia endosymbiont of
Ceratitidis capitata]"
/cog="COG3948 COG3948 306 Phage-related baseplate
assembly protein"
/pfam="Baseplate_J Baseplate_J"
/product="baseplate J/gp47 family protein"
/translation="MKQLNIVEKLSYEEIFSRMKEELVRRDETFSGLVESDPAMKVLE
VAAWRELLLRQRINEAVKGNLLKFATGEDLDNLAEFYGVERQKEEDDERFRKRIKAKI
VGSSTCGSREYYRYHALSADSRVKDTLVESPIPGKVQISILSTQLSTTGILSEELLEI
VKKQVTRDDIRVLTDTVTVVGCNITEIDIHSRMSISPVISKEEIKKQFIKKFEANRRL
GWSVTRSWIIANLFVEGVENVELIEPKEDVVVLGNECANLRNLKIELN"
/besthit="qcoverage 100 , hcoverage 100 , similarity 100
, identity 100 , evalue 8.64e-179 , alnlength 266 ,
Bacteria , Proteobacteria , WP_213863526.1 baseplate
J/gp47 family protein [Wolbachia endosymbiont of
Ceratitidis capitata]"
gene complement(9206..9541)
/locus_tag="wEsol_00922"
CDS complement(9206..9541)
/locus_tag="wEsol_00922"
/codon_start=1
/transl_table=11
/fullproduct="qcoverage 100 , hcoverage 100 , similarity
99.1 , identity 99.1 , evalue 1.09e-69 , alnlength 111 ,
Bacteria , Proteobacteria , WP_213863527.1 GPW/gp25
family protein [Wolbachia endosymbiont of Ceratitidis
capitata]"
/cog="COG3628 COG3628 116 Phage baseplate assembly
protein W"
/pfam="DUF2634 GPW_gp25"
/product="GPW/gp25 family protein"
/translation="MKGMSDKTGKELEGIEHLKQSIIDILTTPINSRVMMRDYGSRLF
ELVDKPINRDLTLEIYSAVAEALQSWEERFKLEKVKMTEVKEGKVTLTDLEGLYLPSPGK
NIHFDEIVV"
/besthit="qcoverage 100 , hcoverage 100 , similarity 99.1
, identity 99.1 , evalue 1.09e-69 , alnlength 111 ,
Bacteria , Proteobacteria , WP_213863527.1 GPW/gp25
family protein [Wolbachia endosymbiont of Ceratitidis
capitata]"
gene complement(9544..9798)
/locus_tag="wEsol_00923"
CDS complement(9544..9798)
/locus_tag="wEsol_00923"
/codon_start=1
/transl_table=11
/product="hypothetical protein"
/pfam="PAAR_motif DUF4150 Pfam-B_14026 PAAR_motif"
/translation="MNKSVVRVGDYCEVTPHFCISGSNNVFVNKGPMCRQGSEFSEGE
EVMVQGSKTTFANGFGAGRVGDIVSCGFKVIKGSENVFAG"
/besthit="qcoverage 58.33333333333333 , hcoverage
58.33333333333333 , similarity 100 , identity 100 , evalue
3.94e-28 , alnlength 49 , Bacteria , Proteobacteria ,
WP_174516944.1 hypothetical protein [Wolbachia
endosymbiont of Cardiocondyla obscurior]"
gene complement(9799..9957)
/locus_tag="wEsol_00924"

```

CDS complement(9799..9957)  
 /locus\_tag="wEsol\_00924"  
 /codon\_start=1  
 /transl\_table=11  
 /product="hypothetical protein"  
 /pfam="Pfam-B\_2532"  
 /translation="MKFQDGTRLLYDKEKHHLEIEVVDKITLKAGESSIEMTKSEIKL  
 KADRINLN"  
 /cog="gpV COG4540 184 Phage P2 baseplate assembly protein  
 gpV"  
 /besthit="qcoverage 100 , hcoverage 33.7662337662338 ,  
 similarity 100 , identity 98.1 , evalue 1.16e-24 ,  
 alnlength 52 , Bacteria , Proteobacteria , WP\_065095149.1  
 MULTISPECIES: phage baseplate assembly protein V  
 [unclassified Wolbachia]"

gene complement(9971..10282)  
 /locus\_tag="wEsol\_00925"

CDS complement(9971..10282)  
 /locus\_tag="wEsol\_00925"  
 /codon\_start=1  
 /transl\_table=11  
 /fullproduct="qcoverage 100 , hcoverage 100 , similarity  
 100 , identity 100 , evalue 1.60e-74 , alnlength 103 ,  
 Bacteria , Proteobacteria , WP\_155968470.1 transposase  
 [Wolbachia pipientis]"  
 /cog="COG3335 COG3335 132 Transposase and inactivated  
 derivatives"  
 /pfam="DDE\_3 DDE\_1"  
 /product="transposase"  
 /translation="MTFKGGCDKEVFNTWLEKMLLPKLPHGTTIVMDNATFHKTPKTK  
 ELIDNARCRLLYLPTYSPDLNPIEHCWNTIKSRLRPLMHKYTDLQLLVGNTIMEIYHS  
 F"  
 /besthit="qcoverage 100 , hcoverage 100 , similarity 100  
 , identity 100 , evalue 1.60e-74 , alnlength 103 ,  
 Bacteria , Proteobacteria , WP\_155968470.1 transposase  
 [Wolbachia pipientis]"

gene complement(10482..10829)  
 /locus\_tag="wEsol\_00926"

CDS complement(10482..10829)  
 /locus\_tag="wEsol\_00926"  
 /codon\_start=1  
 /transl\_table=11  
 /fullproduct="qcoverage 100 , hcoverage 100 , similarity  
 100 , identity 100 , evalue 2.74e-74 , alnlength 115 ,  
 Bacteria;Eukaryota , Proteobacteria;Arthropoda ,  
 WP\_155968342.1 MULTISPECIES: IS630 transposase-related  
 protein [Wolbachia]"  
 /cog="COG3415 COG3415 138 Transposase and inactivated  
 derivatives"  
 /pfam="HTH\_Tnp\_IS630 HTH\_Tnp\_1 HTH\_23 HTH\_28 HTH\_29 HTH\_7  
 CENP-B\_N Pfam-B\_14738 HTH\_8 HTH\_17 HTH\_24 Pfam-B\_2106"  
 /product="IS630  
 transposase-related protein"  
 /translation="MAYSVDLRERAVSMIEKGKSKVEVAELLEIGIATLYRWLRKKAA  
 GESLRPSKNGSFIRKIDPKILEEYVKKNPDHTLAEMKQNLGFGINSIWYRLKQLRITL  
 KKSYSISRASRR"  
 /besthit="qcoverage 100 , hcoverage 100 , similarity 100  
 , identity 100 , evalue 2.74e-74 , alnlength 115 ,  
 Bacteria;Eukaryota , Proteobacteria;Arthropoda ,  
 WP\_155968342.1 MULTISPECIES: IS630 transposase-related

```

gene      protein [Wolbachia]"
          complement(10819..>10890)
          /locus_tag="wEsol_00927"
CDS       complement(10819..>10890)
          /locus_tag="wEsol_00927"
          /codon_start=1
          /transl_table=11
          /product="hypothetical protein"
          /translation="EINIVLPKVNDKGIISYLSYNGV"

```

ORIGIN

```

1  ttgtccggaa ataagtaaaa ggctataata tctgaaaattt tagtacggggg taaagatgag
61  aaaaaagtat ccaacagatc taagcgaag ggaatgggca agaatagaaa aacacttcag
121 agtatcatat aagaaaggag gaaggccgcc aaagtatagc aaaagagaaa tattagaagc
181 aattttctat gtattgcgta caggggtgtc atggcgggat ttaccaaagt attttccgct
241 atggaagact gtgtatgagc agttcaggca atggaagaag caggggaattt ttgagaaaat
301 gaattatgaa attacaaaat atagtagaag aaaaatagga aggaatgagc agccgagtgc
361 ctgtatagta gatagtcaat ctgtaaagac tacagaaaag gggggatcaa aggctatgat
421 ggaagtaaaa aagtaaagg tagaaaaagg catataatta cagacactca gggttttata
481 ctaggttggt acgtaggcgc tgctaacgaa aatgatagag atgggtattaa aatagcatta
541 aacaatatga gaacaaaata tactaaagtt aaaaaaatgt gggctgacat gggataccaa
601 ggaagaaatt taaagaatca cataaaggaa gaatatgaca tagatattga aattgttaaa
661 aggcctccat gtagattttg ggtgcacaaa gatacgccac ctgagctact accaacaaga
721 gaacaagggt ttaaagtaca gccaaagaag tgggttgtag aaaggacttt tgcttggggt
781 aataggaata gaaggctatc gaaggagtat gatttactca caacatccac tgagaatttc
841 atatacctag ctatgagtag gggtatgtta aagagggaat atgcttgaat ttactagttt
901 ccggacaacc tcttacttag atggtagtcc tattcctcaa tctttactag aaatctttgc
961 tgataatcaa gaaaataatc cttccttaga aactttccat gaagcgtttg gaatattaat
1021 aagttactcc atgttaacta ccaaaaaaga tcatagtatg ttaatacaca gcttggttca
1081 agaagttata aggctaaagt cagagaaaag tggaaaaact aaagaagaca taaagactgt
1141 ttttcaacta ttacaaaagg gttttcctta ccacagtgat aaactagaag attatgctaa
1201 gaaacgacaa ttattaccac atttagaagc atttttatca cacatggata atttgctaga
1261 aaaaaattct tcagaaaagc aaacaataga aaaggattat cttttagatt tggtaatgtg
1321 gattaatgat ggatactctg atttaggtta ccctaaaaga caaaaggagt tgatcgaatg
1381 gattttacct attcttcaga ggcattttat ccctgattat gaaattgcta cactgctggg
1441 aagtcttggt attgcttata atgctttaga caatcctcgg aacgcaaaag agttgtttga
1501 atgggcttta cctattcttg agaaatatta tgggtctgat tgtcctaaag ttgctgtttg
1561 actgacaaac cttggtaacg cttatgagga ttcgggtaat cctcataaag caaaaaagtt
1621 gtttgaatgg gctttaccta tttttgagaa acattatggc tctgatcatc cttaaagttg
1681 tgtcatactg acaaaccttg gccacgctta tgagaattta gataatcccc ggagagcaaa
1741 aaagttgttt gagcaagctt tagcaattca agagaaacat tatggacttg atcatttcga
1801 agttgctaaa ctacgggcaa acctcgggtc tgtttggtat gctttgggtg atcttcagaa
1861 agcaaaggag ctgtctgaac gggctttacc tatttttgag aaacattacg gtcctgacca
1921 tcttgaattt gctaaactgt tgtcaaactt aggtgtcatt tatgggggtc taggttatca
1981 taagaaaaga aagagggttac ttgaacgggc tttagcaatc aaaaggaaac attacaggtc
2041 tgaccatttc gaagttgcta tactgctggg aaatcttggg attgctcata atgctttagg
2101 tagttctcag aaagcaagag agttgcttga acgtgcttta cctatTTTTTg aaaaacacta
2161 tggccctgat cacccggaag ttgctaaact actggttaacc cttggcatta cttatggcat
2221 tttaggtaaa cataagaaaa atcaagagtt gcttaaaccg gctttacctg tttttaagaa
2281 acattatggc cctgatcatc cagaaattgc tattatacta ataagcctcg gcatctctca
2341 tggggactta ggtgaccacg agaaacaaaa ggagctgttt gaacaggcct tgcctattct
2401 tgaaaaacat tatggccctg atcacccgga agttgctaca ctactgataa acctaagcga
2461 cgctatgggt gctctaggta accataagaa acaaaaggag ttgtttgcac gggcttcac
2521 catctttaag aaacattatg gccctgatca tccggaagtt gctaaactgc tggcagagct
2581 agatgatatt taggctttta gcaacactag attaataatc acttatttta taatcacact
2641 tccaaaacta acctgttttg atcttctata taatttttta ttttaacgag gaaagtact
2701 gtccttttgc cgtcaactat tctgtggctg taagagaggg caatgtacat cataggctcg
2761 atctcaattg agttgccac agcaactggc ctgttttgta ttgaatgcat tccaagtatt
2821 ccagattgag gaggatttat tatcggagtg gaaagaagcg aaccgtatac tccgccgttt
2881 gagatggtaa atgttgcacc ttccatttct gatacttgta atttaccctc gcgagctttt
2941 ttgccaaag caactaaagt caactcaatt tctgcaaatg acatctgac ggcactccga

```

|      |             |             |             |             |             |             |
|------|-------------|-------------|-------------|-------------|-------------|-------------|
| 3001 | ataacaggta  | caacaaggcc  | tttgtcagtg  | ccaacagcaa  | cacctatgtc  | atagtaatgt  |
| 3061 | ttatatatga  | tttcatcgcc  | tgagatttca  | gcgttaattt  | caggaatctc  | tttcagtgtc  |
| 3121 | tgcaccgctg  | cctttataaa  | aaacgacata  | aaaccaagtt  | ttattccata  | ttttttttca  |
| 3181 | aaggcgctct  | tatatttcgc  | tcttagatcc  | atgacatttt  | tcatgtcaat  | ttcattgaac  |
| 3241 | gtggtcagta  | tgcgagcagt  | attttgcgac  | gctttcaaac  | gagcggcaat  | tacttgccct  |
| 3301 | attttgcctca | tttttactcg  | ttcctctctt  | tgcctccac   | ttactatact  | ttttggcaat  |
| 3361 | tcatattgtt  | ttattgcagg  | ctgttctgct  | ttgttcatat  | ggcctatcac  | atctgctttt  |
| 3421 | gttattctgc  | ctcccatgcc  | agttcctttg  | acgctttctg  | cactgattgc  | attttcttcc  |
| 3481 | ataattttac  | gagctgatgg  | agcatctttt  | ttagcagcac  | tttcgctttt  | atcttctttt  |
| 3541 | ctcgcttcct  | cctttacttc  | tcccacggaa  | agcttcgcta  | acaattgatc  | aggacttatt  |
| 3601 | acatcatctt  | cctttacaag  | aaattcagtt  | atgtgccccg  | aagcttctgc  | agttaattcg  |
| 3661 | agtgtgtgtt  | tgtcagtttc  | aattttcaaag | atcaagtcac  | ctacttttac  | tgcttctcca  |
| 3721 | atacccttct  | ttattttttac | tataccttcc  | gtaactgact  | caccaccaag  | agtttttggg  |
| 3781 | gctctgattt  | ctataatttt  | gctcataaaa  | caacttccgt  | ataaaaacttt | ctatagattt  |
| 3841 | atacatgaaa  | agagacatgt  | aataaactaa  | taaattcatt  | gaggctctta  | tcatttagaa  |
| 3901 | gtggacaaca  | actcccaa    | gtcattccag  | cgtgtgacac  | taagtcataa  | aaattccttg  |
| 3961 | acaagcctcg  | ccagctccct  | tatcatgacg  | tccagtacaa  | tggtgcaaat  | taaaaatctc  |
| 4021 | tccatcctgt  | gctggttctt  | cgattctaaa  | cgccacttct  | acctgggtcat | aaccaatctg  |
| 4081 | aattcgttct  | actaatgctt  | taatgatgcc  | acgcttagtt  | tgccaatcta  | gctgttccaa  |
| 4141 | attagatttt  | acactggaat  | aaagactctt  | tatactgttg  | atgataaggt  | tcattccctt  |
| 4201 | ctctattgct  | ttttgatcaa  | ctaccttttt  | cttctcttct  | tctatccctc  | ttaagcgttc  |
| 4261 | cctcattcct  | ttcatcgtct  | gtttaaattc  | ttcctcactt  | atatactcct  | tatctcctac  |
| 4321 | attttcttga  | ctataatagt  | cttccattaa  | cttttctgatg | ccttggtttta | tttgattttc  |
| 4381 | ccttcttgca  | aacttcttat  | ctgatgatcc  | atcattttta  | ttttctgcaa  | ttctacgggtg |
| 4441 | atactcattt  | tttattatct  | ctgggttttt  | tagtaaattt  | ttcacctttt  | cccatatagc  |
| 4501 | tgtttctaac  | atatctgtac  | ggaccaattt  | attagtacac  | ttctccctac  | catcagtaat  |
| 4561 | acgtatagta  | ctactacagc  | gataatagct  | aaactttttt  | ccttcaactc  | cacattgtgc  |
| 4621 | accactatac  | gcataatccac | agttttgaca  | cacaactaga  | ccttgtaata  | gatatttctt  |
| 4681 | ttttcctccc  | tctctctgca  | tccttgctct  | ttttctattt  | tcatccagtt  | gcttttgtac  |
| 4741 | tttattaaat  | aacccttcat  | caactatttt  | tggtactggg  | atataaatcc  | agctgtcctc  |
| 4801 | atctgtgcga  | cagatagaaa  | ccttttggtt  | atttctttct  | cttctttcaa  | ccctctttaa  |
| 4861 | tttaccaaac  | gctgcttgtc  | cctttatatgc | tggttttctt  | aataccttcc  | aaattattat  |
| 4921 | tggacaccac  | accttctttc  | cagttcttgt  | tctaattgac  | ttatctctta  | gtctacgtat  |
| 4981 | cacttccctt  | atacttattc  | tctcttgccc  | taccacacatg | aatagctgct  | ttactatttt  |
| 5041 | tgcttccctt  | tcattttattt | caaactttgt  | cttttctcta  | tctacatgct  | ttatacgatt  |
| 5101 | ataacaaaaa  | gggtgcaatgc | caattacact  | tacacagcct  | ttttttgctc  | tatggagttt  |
| 5161 | tcccctacga  | ctacgttcca  | taatctttgt  | acactcatat  | tctgccacta  | atccttgcac  |
| 5221 | tcccaataac  | aatttagact  | ctggattatt  | ttcagtctta  | tgattttaaga | atattacttc  |
| 5281 | tactcctgct  | ttttcaaatt  | catcaagtag  | tatcatttga  | tgtgcagatt  | ttcttgatag  |
| 5341 | tcggtcagg   | gaatgaatat  | aaattttatc  | aatttgatct  | tctcctactt  | tatcacgtaa  |
| 5401 | tgcatctaaa  | ccttcacggt  | ctaaactcca  | cccactaagc  | ccatcatcct  | taaattcata  |
| 5461 | ctcattcaat  | aactcatgct  | tatctgcagc  | aattctatgc  | ttgagctcgg  | caatttgact  |
| 5521 | ctctattgta  | ttgttctgcg  | cttgactctt  | cgatgaaact  | cttgcatata  | aggccactgt  |
| 5581 | tatcattttt  | ccttatctcc  | ttttcattgt  | ttcttttttac | cgcatacctt  | agtaacagct  |
| 5641 | cataggcgct  | tgtatagatgt | tgttccgcta  | attcatctgg  | ctcgtatcgg  | caagttaatg  |
| 5701 | ttctttttct  | catagtttct  | cctgcaaatg  | tttttgtagt  | gcaaggagcc  | ttaccactcc  |
| 5761 | ttttttccat  | caatccattt  | actcttatga  | aaaagaccaa  | ccttttatcag | ctacagcctt  |
| 5821 | caaatttggt  | ctagcccttc  | cctttaccaac | tgctgttgcg  | ccttctgata  | cgactcttat  |
| 5881 | ttttttaaca  | aactttccat  | tttctctgtt  | tctttcttta  | atacctcggc  | tatttctttg  |
| 5941 | ctattttttcg | cataatccat  | cgctgttatt  | ccaaatttat  | ctgcttgctc  | tatttcagcc  |
| 6001 | cctgctttta  | ctagctcctc  | cactatttct  | ttttctccta  | ccatacatgc  | aagatgcagc  |
| 6061 | ggagtgcatt  | tattgccata  | ctcttcagca  | tttacattcc  | ctcctgattc  | tatcaattct  |
| 6121 | ctaactgttt  | ctagacgttt  | ctccgttatc  | gctagatgca  | gtgctgtatg  | tcctcttaca  |
| 6181 | tctgctgcac  | tcacatctac  | tcttttttcg  | attaataacc  | tactgttttt  | tacctctact  |
| 6241 | gcataatgta  | gagctgttct  | tcttttttcg  | tctctttcat  | aaatatTTTT  | aaacgagttc  |
| 6301 | tctaatagtg  | acttatcttt  | tttaccagc   | tttaccataa  | cttaccacac  | cctttcttta  |
| 6361 | aacctaagcc  | ttctttttta  | ccacctcatc  | tatcattgca  | ttcacttggc  | tgattatctt  |
| 6421 | gcttgctaaa  | ttttgacatt  | ctttctttat  | tagcgatttg  | tctctcttcc  | ttatttctcc  |
| 6481 | tatctctatt  | attttttagct | cggcatgta   | gcttccattc  | aacatgtctg  | ctatttctcc  |
| 6541 | cactagcccc  | tctattccat  | agcacgtcag  | ttctctactt  | tttgttattc  | ctcctttttc  |

|       |             |             |             |             |             |             |
|-------|-------------|-------------|-------------|-------------|-------------|-------------|
| 6601  | tctcagaaat  | ttactcgcct  | tttcaactctc | tttgcctatca | catagacgat  | actttttcact |
| 6661  | ttcccagatg  | taatacattg  | gcgttgcgcc  | gtacttattc  | agttgattaa  | cttcagctcc  |
| 6721  | agcctttacc  | agctctttta  | ttatttcaac  | tcttgctcct  | cccattcttg  | acgcagagt   |
| 6781  | cagtggcgta  | catccagtga  | catattgagt  | ggcatttact  | tctgctcccc  | accttagcag  |
| 6841  | cactttttaca | ttttctaaac  | tctttgcgaa  | tactgcacag  | tgtagagggtg | tataaccatt  |
| 6901  | tttatctctt  | gcattttac   | ctgctccttt  | ttttattaat  | aatctcactg  | ttttgtaatc  |
| 6961  | agagattttct | actgcttgat  | gcaagatcgt  | ctctccttct  | tcattttctt  | tattaatggt  |
| 7021  | tttaaaccg   | ttacttgata  | cttcttttaa  | aaacttactc  | ttgctaaaac  | tcattttcata |
| 7081  | cctcacaaaa  | ttagcttttc  | tagcgctaga  | taaatttctt  | atgtttac    | gctgctattc  |
| 7141  | aagtcatgtc  | tttttttagca | tgagaaagca  | agtctttttc  | tttttatttc  | atacactttt  |
| 7201  | acctattatt  | aatataatat  | atgagtatct  | aaatataagt  | acttaactta  | ttagagatat  |
| 7261  | tattcgacta  | tctttccaac  | ttctgtgcaa  | atgtcgatgt  | tcattgccact | tcagtactcc  |
| 7321  | cgggtaaaat  | actaaaatgt  | gcttttctaa  | ttcgtgtatt  | gagtcttttt  | gctctgaatc  |
| 7381  | caaatcattt  | ttatagtaaa  | cgttggtgtt  | tgctaaaaca  | tattttctga  | ccttctgatc  |
| 7441  | tgtataattt  | tctactttat  | agttgtgagt  | aacgctaaac  | ctttctaaaa  | ttgggtttgtg |
| 7501  | ttttaaattc  | caacgttgcc  | atgaaagttt  | atcgtttccc  | aatacaaat   | tatttccttc  |
| 7561  | ttcttctatg  | ctaccaaccg  | gaaagcacgc  | atttatttct  | tctaagttcc  | aactgtccga  |
| 7621  | taatataact  | tgcgccctcg  | caaacttaat  | ttctggtaat  | aaactctgtg  | gtaatggata  |
| 7681  | tagtgctttt  | aagttatacc  | actgatgact  | tctttcatag  | acgcctttgt  | aatcttttgt  |
| 7741  | atgaggctct  | gtttctccaa  | gtactgctac  | atctaatacga | tatatgtcat  | tactaaatgt  |
| 7801  | ttgttcataa  | tggttgcgta  | gataactctc  | tataacctta  | attgacgtaa  | cactaaacct  |
| 7861  | gaagaaattt  | actcttccaa  | acgataacac  | cggcccatct  | ttttctattt  | ttacccttga  |
| 7921  | atagtcagaa  | agaagatctc  | caaataaact  | ctcatccaat  | ataaatcttt  | gcgcattata  |
| 7981  | ataatcgtaa  | aaaatcctca  | tcaatctgga  | tcttacaggc  | agtgatagtt  | ttgccagctc  |
| 8041  | tactactgca  | tctacgaaga  | agtcatttgg  | tacctctttt  | atccctactt  | gcaactcaaa  |
| 8101  | aaagtgttta  | ccgggtggtt  | cttcgatgat  | tgtaaatgtct | tctataattg  | cccacttgag  |
| 8161  | tgctatttta  | agtgatttag  | gtgttcctcg  | cagtctttga  | aattttactc  | cttctactat  |
| 8221  | ggctcttctt  | ttatctttta  | cccagagtag  | tatttcttct  | aaaccatatt  | cttctattat  |
| 8281  | ccacggcaat  | gtttcttctt  | ccaatctaaa  | cttaaattccc | ctgatacagc  | ttggatctac  |
| 8341  | tttataatct  | atcgcatcta  | ctagcgcttt  | ttcctgtttt  | gttgcatattg | gtggcagtaa  |
| 8401  | cattaattca  | actcaatctt  | taaatttcgc  | aaatttgcac  | attcattttcc | tagcactaca  |
| 8461  | acatcttctt  | ttggctcgat  | taattccaca  | ttttctacac  | cctctacaaa  | tagattcgct  |
| 8521  | attatccatg  | atcttgtcac  | actccatccc  | agccttctat  | ttgcttcaaa  | cttcttaatg  |
| 8581  | aactgcttct  | tgattttcctc | cttcgatatac | acaggactta  | tgctcattct  | gctgtgaata  |
| 8641  | tctattttccg | taatatgtgca | accaactact  | gttactgtat  | ctgttaaaaac | ccttatatca  |
| 8701  | tctctagtaa  | cctgcttttt  | tacaatttct  | agtagctctt  | ctgacaatat  | gccagtgtgtg |
| 8761  | gataattgtg  | ttgataagat  | tgaaatttgt  | acttttcctg  | gtataggtga  | ttctactaat  |
| 8821  | gtatctttta  | ctctactatc  | tgccgacagt  | gcatgatacc  | tataatactc  | cctgcttcca  |
| 8881  | cacgtgcttg  | agcctactat  | ctttgcttta  | attctttttc  | taaaatcgttc | atcatcttct  |
| 8941  | tctttttg    | tctccactcc  | ataaaactca  | gctaaattat  | caagatcttc  | tcccgttgca  |
| 9001  | aatttttagta | aattaccctt  | tacagcttcg  | tttatccctt  | gtctgagtaa  | caactctctc  |
| 9061  | catgctgcta  | cttctaatac  | cttcattgct  | ggatccgatt  | ctactaatcc  | tgaaaagggtt |
| 9121  | tcattctctac | ggactaaactc | ttctttcatt  | ctcgaaaaga  | tttcttcata  | actcagcttt  |
| 9181  | tctacaatat  | ttagctgctt  | catcttttaa  | ctacaatttc  | atcaaaaatga | atgtttttcc  |
| 9241  | cgcttggtaa  | gtataatcct  | tctagatcaa  | gcgttacttt  | tccttctttc  | acctctgtca  |
| 9301  | tttttacttt  | ttctagctta  | aatcttttcc  | cccaactttg  | tagagcttct  | gctactgctg  |
| 9361  | aatagatttc  | caaagttaaa  | tctctattta  | ttggcttatac | tactaattca  | aatagtcttg  |
| 9421  | accataatc   | tctcctcatt  | actctactgt  | taataggagt  | ggtcagtata  | tcaattattg  |
| 9481  | attgttttcag | atgttctatt  | ccttctaatt  | cttttcctgt  | tttgaggtcc  | atccctttca  |
| 9541  | tttttagcct  | gcaaacacgt  | tttcaactgc  | ttttattact  | ttaaaccac   | atgaaactat  |
| 9601  | atctcctact  | cttcccgcctc | caaaccatt   | tgcaaacact  | gtttttgatc  | cttgaaccat  |
| 9661  | tacttctcct  | tcactaaaac  | tttctccttg  | tctgcacatt  | ggcttaccat  | ttacaaaaac  |
| 9721  | attgttacta  | ccactaatgc  | aaaaatgcgg  | tgttacttct  | acacaataat  | ctcctactcg  |
| 9781  | tacaaccgat  | ttattcattt  | aattaagggt  | tattctatct  | gctttcaggt  | ttatttcgct  |
| 9841  | cttcgtcatc  | tctatgctcg  | attccccagc  | tttcagtgtt  | attttgtcta  | ctacttcaat  |
| 9901  | ctctaaatga  | tgcttctctt  | tatcatataa  | caatcttggt  | ccatcctgaa  | acttcacact  |
| 9961  | atagtatttt  | ctaaaatgaa  | tgataaattt  | ccattatggg  | attaccaacc  | aaaagtgtga  |
| 10021 | agtctgtata  | tttatgcatt  | aaaggctctga | ggcggtttt   | gatgggtattc | caacaatgct  |
| 10081 | ctatagggtt  | caaactctgg  | gaatatgttg  | gtagatagag  | caaacggcat  | ctagcattat  |
| 10141 | ctattaactc  | ctttgttttg  | ggagttttat  | ggaatgtggc  | attgtccata  | actattgtag  |

```

10201 taccatgtgg caatttaggt aataacatct tctctaacca tgtattgaat acctctttgt
10261 cacacccacc ttgaaagtc attggtgcaa taaatctctt tccaatccac cgcctatta
10321 tactgattct ctctcgtttt cttcctggaa tatctgcata aattttcttt cctattggag
10381 cacgtccata ctctcggtat aacctattat caactcctgc ttcatttata tataagatgc
10441 tggaatggtc tatttttgag attttatcgg taaatcgctg cctatcttct tgattgcgct
10501 cttgatatag tgtaactttt ttttaaagta attcttagct gtttcagcct ataccaaatt
10561 gaatttattc caaatccaag attttgtttc atctctgcca gcgtatgata tggattcttt
10621 ttaacatatt cttcgagtat ttttgggtct atttttcgaa taaagctgcc gtttttcgat
10681 ggccttaggc tttcaccagc ggctttcttt cttaaccagc ggtacagagt tgctattcct
10741 atctccaaaa gctctgccac ctcaaccttt gacttccctt tttctatcat cgatactgcc
10801 ctttccctta aatccacact atacgccatt ataactcaaa tagcttatta tacctttatc
10861 atttactttg ggaagtacta tattttattc

```

//

```

LOCUS      JAQZAU010000077          1926 bp    dna        linear    ENV 17-MAR-2023
DEFINITION MAG: Wolbachia pipientis isolate wEsol contig_4280, whole genome
            shotgun sequence.
ACCESSION  JAQZAU010000077  JAQZAU010000000
VERSION    JAQZAU010000077.1
DBLINK     BioProject: PRJNA929258
            BioSample: SAMN33142973
KEYWORDS   WGS; ENV; Metagenome Assembled Genome; MAG.
SOURCE     Wolbachia pipientis (insect metagenome)
ORGANISM   Wolbachia pipientis
            Bacteria; Pseudomonadota; Alphaproteobacteria; Rickettsiales;
            Anaplasmataceae; Wolbachieae; Wolbachia.
REFERENCE  1  (bases 1 to 1926)
AUTHORS    Fiutek,N., Couger,B.M., Roy,S., de la Torre,J.R. and Connor,E.F.
TITLE      Genomic assessment of the contribution of the Wolbachia
            endosymbiont of Eurosta solidaginis to gall-induction
JOURNAL    International Journal Molecular Sciences
REFERENCE  2  (bases 1 to 1926)
AUTHORS    Fiutek,N., Couger,B.M., Roy,S., de la Torre,J.R. and Connor,E.F.
TITLE      Direct Submission
JOURNAL    Submitted (10-FEB-2023) Biology, San Francisco State University,
            1600 Holloway Ave, San Francisco, CA 94132, USA
COMMENT    ##Genome-Assembly-Data-START##
            Assembly Date      :: JUN-2019
            Assembly Method    :: FLYE v. 06-2019
            Genome Representation :: Full
            Expected Final Version :: Yes
            Genome Coverage     :: 100.0x
            Sequencing Technology :: Illumina HiSeq; PacBio Sequel
            ##Genome-Assembly-Data-END##
FEATURES   Location/Qualifiers
            source              1..1926
                                 /organism="Wolbachia pipientis"
                                 /mol_type="genomic DNA"
                                 /submitter_seqid="contig_4280"
                                 /isolate="wEsol"
                                 /isolation_source="galls on Solidago altissima"
                                 /host="Eurosta solidaginis MN-2018-EFC"
                                 /db_xref="taxon:955"
                                 /environmental_sample
                                 /country="USA: Cowling Arboretum, Carleton College,
                                 Northfield, MN"
                                 /lat_lon="44.48 N 93.13 W"
                                 /altitude="280 m"
                                 /collection_date="2018-11"
                                 /metagenome_source="insect metagenome"
                                 /note="metagenomic"

```

gene 552..923  
 /locus\_tag="wEsol\_00928"

CDS 552..923  
 /locus\_tag="wEsol\_00928"  
 /codon\_start=1  
 /transl\_table=11  
 /product="hypothetical protein"  
 /pfam="GrpE"  
 /translation="MQKQISDASDYAVTKLARDMIDSCDNLKRVMEILKDGPVHEGI  
 KVAYQKIINDLKKHGIEEVDPLGELFDSNLHQAVVEREDNEKKPGTIVEVLQTGYTIK  
 NRLLRPAMVILSKKSADCGSD"  
 /cog="GrpE COG0576 193 Molecular chaperone GrpE (heat  
 shock protein)"  
 /besthit="qcoverage 100 , hcoverage 70.2857142857143 ,  
 similarity 100 , identity 100 , evaluate 5.49e-80 ,  
 alnlength 123 , Bacteria , Proteobacteria , EAL60143.1  
 co-chaperone GrpE [Wolbachia endosymbiont of Drosophila  
 simulans]"

gene 1259..1846  
 /locus\_tag="wEsol\_00929"

CDS 1259..1846  
 /locus\_tag="wEsol\_00929"  
 /codon\_start=1  
 /transl\_table=11  
 /product="hypothetical protein"  
 /pfam="tRNA-synt\_1b MazG"  
 /tigr="TIGR00233 trpS 328 tryptophan--tRNA ligase"  
 /translation="MTQFKDKAGSDKQKASLGLYSYPVLMAADILLYQTKYVPVGDDQ  
 KQHLELARDIASAFNNHYKLDYFIVPEILTLDCSTRIMSLRDGTSKMSKSDPSEHSCI  
 NLDDTDDLIVKKIEKAKTDSILGFATLKCRPEISNLINIYSVLSNVNAEKVCEEVNKH  
 DMKHFKEKELADLIISVISPIREKMNDLLKRPIPT"  
 /cog="TrpS COG0180 314 Tryptophanyl-tRNA synthetase"  
 /besthit="qcoverage 96.9230769230769 , hcoverage  
 56.9277108433735 , similarity 100 , identity 100 , evaluate  
 1.08e-127 , alnlength 189 , Bacteria , Proteobacteria ,  
 WP\_006280207.1 MULTISPECIES: tryptophan--tRNA ligase  
 [Wolbachia]"

# ORIGIN

```

1 aagtcggaag agactttttc gaaggtaaag tcaccttacc tgctatttat agcatacaaa
61 agggcagtcg gcagagcaaa aattctgga aaatgctttt ctctgtcagc tagacacaa
121 tttagaccaag cattacacta tattaatcac cataatgcca ttcagctttc tatggaaaaa
181 gctagactac tacattaata tggcacaaaa tgatattagt actttttctg attcttttta
241 taaaaattac tttaattgac tttttaaatg cgagcataga aagacaatgt agctggcgct
301 tgatattttc gaattaattg ctatatattt attagattct taagggtaat gatatgtcag
361 atagcagtaa agagaaaaag aagaaagttt gctgatatgg taagtaggca gaaggtgacg
421 accaacaag tgataacat aagcaaactg atgatttaaa tgaagatctc aatacattaa
481 aagaacgtgc agctcagctt gaagatcatt tacgccgtgc tgttgagat aatgaaaacg
541 tcaaacgtat aatgcaaaaag caaattagcg atgcaagtga ctacgcagtc acaaaaacttg
601 cacgtgatat gatcgactcg tgcgacaatt taaaaagagt aatggaaatt ttgaaagacg
661 gtgatcctgt tcatgagggg attaaagtag cttatcaaaa aattataaat gatctaaaaa
721 aacatggaat agaggaagta gatccacttg gtgagctttt tgatagtaat ttacaccaag
781 ctggtgtgga aagagaagac aatgaaaaaa agcctggcac cattgtagaa gtactacaaa
841 ctggttatac tatcaaaaat aggttgctcc gtcctgcaat gggtattctt tctaagaaat
901 ctgctgattg tgggaagcga tagcatgagg taaatgtata atgacaagta ttgtcttttt
961 caggtatcca gccaaagtggc gtactacatt taggtaatta tcttggtgca atcaaacagt
1021 ggatagactt acaggataaa tacaaatctc tttttgtatt gtcgacctac acgcaatcac
1081 agcaaataag cttcccgcga gtgaattaaa aagtaatatt ttcaaaacag cagcagctta
1141 tattgcatgc ggaatagata cagaaaagtc cattattttt agtcagtcca cagttagtgg
1201 tcatgcagaa ctgggctggc tgcttgatg ctatacacca attgggtggc ttaatcgcat
1261 gactcaattt aaagataaag ctggcagcga taaacaaaaa gcctctcttg gattatatag

```

```

1321 ttatccagta cttatggctg cagatatatt gttgtatcaa actaaatacg ttcctgttgg
1381 tgatgatcaa aaacagcatt tggagcttgc acgtgatatt gcatcagctt ttaacaatca
1441 ttataagctg gattatttca tcgtacctga aatcttaact ttggattgca catcaaggat
1501 aatgagctta agggatggca caagcaagat gagtaaatct gatccttcag aacattcgtg
1561 cattaacctt gatgatacgg atgacttaat tgtcaaaaaa atagaaaaag caaaaaacaga
1621 ttcaattcta ggctttgcta ctttaaagtg cgcaccagaa ataagcaatt tgataaacat
1681 ttattcagtg cttagtaatg taaatgcaga aaaagtatgt gaagaagtga acaaacaatga
1741 catgaagcac ttcaaaaaag agttagctga tttaattatc agtggttatat caccatacgc
1801 tgagaaaatg aatgatcttt taaaaagacc aattccattt acatgaaata ttaaaaaaag
1861 gcacaaagaa agcagcagaa attgcaaccc ataataataa agaaatcaag gatattattg
1921 gatttg

```

//

```

LOCUS      JAQZAU010000078      1860 bp      dna      linear      ENV 17-MAR-2023
DEFINITION MAG: Wolbachia pipientis isolate wEsol contig_42877, whole genome
            shotgun sequence.
ACCESSION  JAQZAU010000078  JAQZAU010000000
VERSION    JAQZAU010000078.1
DBLINK     BioProject: PRJNA929258
            BioSample: SAMN33142973
KEYWORDS   WGS; ENV; Metagenome Assembled Genome; MAG.
SOURCE     Wolbachia pipientis (insect metagenome)
ORGANISM   Wolbachia pipientis
            Bacteria; Pseudomonadota; Alphaproteobacteria; Rickettsiales;
            Anaplasmataceae; Wolbachieae; Wolbachia.
REFERENCE  1  (bases 1 to 1860)
AUTHORS    Fiutek,N., Couger,B.M., Roy,S., de la Torre,J.R. and Connor,E.F.
TITLE      Genomic assessment of the contribution of the Wolbachia
            endosymbiont of Eurosta solidaginis to gall-induction
JOURNAL    International Journal Molecular Sciences
REFERENCE  2  (bases 1 to 1860)
AUTHORS    Fiutek,N., Couger,B.M., Roy,S., de la Torre,J.R. and Connor,E.F.
TITLE      Direct Submission
JOURNAL    Submitted (10-FEB-2023) Biology, San Francisco State University,
            1600 Holloway Ave, San Francisco, CA 94132, USA
COMMENT    ##Genome-Assembly-Data-START##
            Assembly Date      :: JUN-2019
            Assembly Method    :: FLYE v. 06-2019
            Genome Representation :: Full
            Expected Final Version :: Yes
            Genome Coverage    :: 100.0x
            Sequencing Technology :: Illumina HiSeq; PacBio Sequel
            ##Genome-Assembly-Data-END##
FEATURES   Location/Qualifiers
            source              1..1860
                                /organism="Wolbachia pipientis"
                                /mol_type="genomic DNA"
                                /submitter_seqid="contig_42877"
                                /isolate="wEsol"
                                /isolation_source="galls on Solidago altissima"
                                /host="Eurosta solidaginis MN-2018-EFC"
                                /db_xref="taxon:955"
                                /environmental_sample
                                /country="USA: Cowling Arboretum, Carleton College,
                                Northfield, MN"
                                /lat_lon="44.48 N 93.13 W"
                                /altitude="280 m"
                                /collection_date="2018-11"
                                /metagenome_source="insect metagenome"
                                /note="metagenomic"
            gene                286..1233

```

CDS  
 /locus\_tag="wEsol\_00930"  
 286..1233  
 /locus\_tag="wEsol\_00930"  
 /codon\_start=1  
 /transl\_table=11  
 /fullproduct="qcoverage 100 , hcoverage 100 , similarity 100 , identity 100 , evalue 4.42e-217 , alnlength 315 , Bacteria , Proteobacteria , WP\_015588780.1 MULTISPECIES: IS110 family transposase [unclassified Wolbachia]"  
 /cog="COG3547 COG3547 303 Transposase and inactivated derivatives"  
 /pfam="DEDD\_Tnp\_IS110 FH2 Transposase\_20"  
 /product="IS110 family transposase"  
 /translation="MVTSYQNFIGIDIGKFKNVVAIHKQKNAVEFDNNASGWQQLFQE FSDILPNALVTLENTGKYELGLSHFLTDKNIAVHRANTRKVKSFILSHGALAKSDRSD ARALAQYGFERHRTISLFVPTSTEQSTLAALCQRRDDITQMRTQEKCRLEAPENDHIK ESCQKTIEFFDSQINELNDTIQKIIDESRELQQRQKILKTVPGIGKKLSQDFLCMPE LGYLNKREVASLAGVAPHPKESGKAVGYRRITGGRSNVRSKLFTAAMAATRSKSILGA FYSKLVESGKKMVAITALMRKIIIVIANTRLKEAINLHT"  
 /besthit="qcoverage 100 , hcoverage 100 , similarity 100 , identity 100 , evalue 4.42e-217 , alnlength 315 , Bacteria , Proteobacteria , WP\_015588780.1 MULTISPECIES: IS110 family transposase [unclassified Wolbachia]"

gene  
 1430..1705  
 /locus\_tag="wEsol\_00931"  
 CDS  
 1430..1705  
 /locus\_tag="wEsol\_00931"  
 /codon\_start=1  
 /transl\_table=11  
 /fullproduct="qcoverage 100 , hcoverage 100 , similarity 100 , identity 97.8 , evalue 7.92e-38 , alnlength 91 , Bacteria , Proteobacteria , ACN94906.1 hypothetical protein WRi\_000370 [Wolbachia sp. wRi]"  
 /pfam="PDDEXK\_2 Pfam-B\_12708"  
 /tigr="TIGR01784 T\_den\_put\_tspse 273 conserved hypothetical protein"  
 /product="hypothetical protein"  
 /translation="MIAEKAPIIKLAYDELDFKFCWNEKDLVAYEERIMDLRKEEAILE YKLEEGIEKGKIEVAKNLLKAGVSVNLIAESTGLSQAEIVQLKQEVA"  
 /besthit="qcoverage 100 , hcoverage 100 , similarity 100 , identity 97.8 , evalue 7.92e-38 , alnlength 91 , Bacteria , Proteobacteria , ACN94906.1 hypothetical protein WRi\_000370 [Wolbachia sp. wRi]"

gene  
 complement(1777..>1860)  
 /locus\_tag="wEsol\_00932"  
 CDS  
 complement(1777..>1860)  
 /locus\_tag="wEsol\_00932"  
 /codon\_start=1  
 /transl\_table=11  
 /product="hypothetical protein"  
 /translation="TCQLEPDSSIRSECGRRTYSNKVGGKI"

ORIGIN

```

1  gtctacattc ctcaactttg agaccagatt taaaatttta tgtaatatct ctatthttcca
61  tctaaggaaa ttgtaagtta aaaacgtgat ataaaagaga taagagagaa agataaccct
121 gctcactagg aatagcgggc gtgcgcgacc gaaaggaaat tggattaca accgttggtgta
181 tcaaggtacg ctagccctat ctctcgatac gtttgaatag ttgcttgga catatatatg
241 caccggttta caatcttaaa ttaactaaaa ctatcgaggt ttattatggt tacatcttat
301 caaaatttta ttggcattga catcgaaaaa tttaaaaaatg tcgttgcaat tcacaaacag
361 aagaatgctg tcgaatttga taataatgct tctggttgga acaattatt tcaagagttt

```



```

/isolate="wEsol"
/isolation_source="galls on Solidago altissima"
/host="Eurosta solidaginis MN-2018-EFC"
/db_xref="taxon:955"
/environmental_sample
/country="USA: Cowling Arboretum, Carleton College,
Northfield, MN"
/lat_lon="44.48 N 93.13 W"
/altitude="280 m"
/collection_date="2018-11"
/metagenome_source="insect metagenome"
/note="metagenomic"
gene 1..198
/locus_tag="wEsol_00933"
CDS 1..198
/locus_tag="wEsol_00933"
/codon_start=1
/transl_table=11
/fullproduct="qcoverage 100 , hcoverage 98.4848484848485
, similarity 100 , identity 100 , evaluate 3.77e-38 ,
alnlength 65 , Bacteria , Proteobacteria , CAQ55081.1
hypothetical protein WP0973 [Wolbachia endosymbiont of
Culex quinquefasciatus Pel]"
/translation="MRPESLRSYCLKGEEFIQKETERILKLIKPDVLPSESTHQCESG
NRLVPSDADNEPPLEKEDAQS"
/product="hypothetical protein"
/besthit="qcoverage 100 , hcoverage 98.4848484848485 ,
similarity 100 , identity 100 , evaluate 3.77e-38 ,
alnlength 65 , Bacteria , Proteobacteria , CAQ55081.1
hypothetical protein WP0973 [Wolbachia endosymbiont of
Culex quinquefasciatus Pel]"
gene 360..626
/locus_tag="wEsol_00934"
CDS 360..626
/locus_tag="wEsol_00934"
/codon_start=1
/transl_table=11
/fullproduct="qcoverage 100 , hcoverage 100 , similarity
100 , identity 100 , evaluate 2.05e-61 , alnlength 88 ,
Bacteria , Proteobacteria , WP_026097253.1 hypothetical
protein [Wolbachia endosymbiont of Ceratitis capitata]"
/translation="MYANNNSTGIEKPPNPLLYDWRNRVSLYFRLHGKQTARNADGSA
GKGWEWRKMPFCNEMDRICNINSRENEQTSIWVSLVTRNFVNHLR"
/product="hypothetical protein"
/besthit="qcoverage 100 , hcoverage 100 , similarity 100
, identity 100 , evaluate 2.05e-61 , alnlength 88 ,
Bacteria , Proteobacteria , WP_026097253.1 hypothetical
protein [Wolbachia endosymbiont of Ceratitis capitata]"
gene 635..2182
/locus_tag="wEsol_00935"
CDS 635..2182
/locus_tag="wEsol_00935"
/codon_start=1
/transl_table=11
/pfam="RVT_N RVT_1 GIIM"
/fullproduct="qcoverage 100 , hcoverage 100 , similarity
100 , identity 100 , evaluate 0.0 , alnlength 515 ,
Bacteria , Proteobacteria , WP_155968541.1 MULTISPECIES:
group II intron reverse transcriptase/maturase
[Wolbachia]"

```

```

/translation="MITSKPVSASTESFEAWKQLPWKKCQKVIVRLQRRIVKAVQEGR
WGKVKALQHLLTRSFSGKALAVKRVTENQGKTTAGVDRQLWSTCNAKFQGIKLLKQRG
YKPSPLKRIYISKSNGKRRPLGIPTIKDRAMQALYLLALEPVAETISDRHSYGFRPKR
SCADATVACHLLLASRNQLQWILEGDIKGCDFNINHEWLMKHIPMEKKILHRWLKAGF
LESKTLYPTTAGTPQGSIIISPILANFTLDGLEQLLESRFGLGSKRRGKIRSGVNVIR
YADDFIISGFTHEVLENEVKPLVSSFLHERGLILSEEKTKITSITTGFDFLGCNVRRY
NKKLIKPSKESIKRLLNKARTLIKANIANNTQAIVIKSLNSLLRGWGNYYHHVCAKKA
FRKIDNEIWHSLWKWAKKRHRPRKGLRWIKNRYFKVMGQRQWVFAAPICKNKPKEIRYL
RLLKLIDIPIRRHVKIRADANPLDLKWKKYFDERVKRTRMLASSFSREGSLLLVSPLK
LMYSEDL"
/product="group II intron
reverse transcriptase/maturase"
/besthit="qcoverage 100 , hcoverage 100 , similarity 100
, identity 100 , evalue 0.0 , alnlength 515 , Bacteria ,
Proteobacteria , WP_155968541.1 MULTISPECIES: group II
intron reverse transcriptase/maturase [Wolbachia]"
gene 2179..2556
/locus_tag="wEsol_00936"
CDS 2179..2556
/locus_tag="wEsol_00936"
/codon_start=1
/transl_table=11
/product="hypothetical protein"
/translation="MKDKPVRQKKNLDKGLKRSVGKPACCVSKGGSSSNTASLPDQLA
KTKDTSVLVNKKIIKIVSLLKLYCKTKKYFQFTSCIAVYKLVYMLISKLVLCIQDSRN
LLINIYTNQLYSINLCKIPFYIR"
/besthit="qcoverage 37.6 , hcoverage 17.2794117647059 ,
similarity 100 , identity 97.9 , evalue 1.84e-19 ,
alnlength 47 , Bacteria , Proteobacteria , WP_155968895.1
Rpn family recombination-promoting nuclease/putative
transposase [Wolbachia pipientis]"
gene complement(2577..3170)
/locus_tag="wEsol_00937"
CDS complement(2577..3170)
/locus_tag="wEsol_00937"
/codon_start=1
/transl_table=11
/product="hypothetical protein"
/pfam="Osmo_CC Transposase_20 HHH"
/translation="MNLLVSGQPLNNHLERKERLPKAVVNAWGDLAMNIEQKIETIKN
SHELLKQHKELLENFQLLLTIPIGIGESAIAILAEVNPINRAFRNARQLAAYAGAIPR
NITSGSSVYAKPRLSKVGSRTLCKALFFPAIVAKNHNPIVMSFCQRLKEKGKHNMIAIV
GAAMRKLHIIFGILRSKSAFNPEHIKNYRASEGLVI"
/besthit="qcoverage 92.3857868020305 , hcoverage
52.2988505747126 , similarity 96.7 , identity 91.8 ,
evalue 1.06e-110 , alnlength 182 , Bacteria ,
Proteobacteria , WP_174132894.1 IS110 family transposase
[Wolbachia endosymbiont of Atemnus politus]"
gene complement(3167..3508)
/locus_tag="wEsol_00938"
CDS complement(3167..3508)
/locus_tag="wEsol_00938"
/codon_start=1
/transl_table=11
/fullproduct="qcoverage 100 , hcoverage 100 , similarity
100 , identity 100 , evalue 1.53e-79 , alnlength 113 ,
Bacteria , Proteobacteria , AAS13810.1 transposase, IS5
family, OrfB [Wolbachia endosymbiont of Drosophila
melanogaster]"
/cog="COG3293 COG3293 124 Transposase and inactivated

```

```

derivatives"
/pfam="DDE_Tnp_1_2 DDE_Tnp_1"
/product="transposase, IS5 family, OrfB"
/translation="MRTKYTKVKKMWADMGYQGRNLKNHIKEEYDIDIEIVKRPPCRF
WVHKDTPPELLPTREQGFKVQPRRWVVERTFAWVNRNRRLSKEYDLLTTSTENFIYLA
MSRVMLKREYA"
/besthit="qcoverage 100 , hcoverage 100 , similarity 100
, identity 100 , evalue 1.53e-79 , alnlength 113 ,
Bacteria , Proteobacteria , AAS13810.1 transposase, IS5
family, OrfB [Wolbachia endosymbiont of Drosophila
melanogaster]"
gene complement(3619..3999)
/locus_tag="wEsol_00939"
CDS complement(3619..3999)
/locus_tag="wEsol_00939"
/codon_start=1
/transl_table=11
/fullproduct="qcoverage 100 , hcoverage 100 , similarity
100 , identity 100 , evalue 1.16e-87 , alnlength 126 ,
Bacteria , Proteobacteria , AOV87106.1 transposase
[Wolbachia endosymbiont of Drosophila incompta]"
/cog="COG3293 COG3293 124 Transposase and inactivated
derivatives"
/pfam="DUF4096"
/product="transposase"
/translation="MRKKYPTDLSEREWARIEKHFRVSYKKGGRPPKYSKREILEAIF
YVLRGTGCQWRYLPNDFPLWKTVYEQFRQWKKQGIFEKMNYEITKYSRRKIGRNEQPSA
CIVDSQSVKTTEKGGSKAMMEVKK"
/besthit="qcoverage 100 , hcoverage 100 , similarity 100
, identity 100 , evalue 1.16e-87 , alnlength 126 ,
Bacteria , Proteobacteria , AOV87106.1 transposase
[Wolbachia endosymbiont of Drosophila incompta]"
gene complement(4027..4986)
/locus_tag="wEsol_00940"
CDS complement(4027..4986)
/locus_tag="wEsol_00940"
/codon_start=1
/transl_table=11
/product="hypothetical protein"
/pfam="Cas6 DDE_Tnp_1"
/translation="MRELTMDRIACLSKDLNEFFNEKADEISIAVGFIKRKRKLNGSS
FIKAMVFGNIGVDDCSIETMCQLLNEDSIEITKQGLDFRFSEEAVEFMKKMYNEALCL
FKKSLQIDCKILQQFGSVKLLDSSYIILPSSMEDMYKGYGSSYRDCENNTKSGIKLQL
VFDYLNQALDKLNFMEGIRSDQGYRDYLNGLSANDLLIFDLGYFVPSSFKQIDEAGAY
FVSRYKSDTNIYDIETNQKIELLEYLEGQLSSEKEVLLGKEVKIKVRIICQKLTEEQS
MARRRKANKLAKSHGYTSSQKNQKLLDWSIFITRGCPEISKRL"
/besthit="qcoverage 96.8652037617555 , hcoverage
69.1275167785235 , similarity 99.7 , identity 99.7 ,
evalue 2.20e-213 , alnlength 309 , Bacteria ,
Proteobacteria , AGJ99681.1 Transposase, IS4 family
[Wolbachia endosymbiont of Drosophila simulans wHa]"
gene 5139..5360
/locus_tag="wEsol_00941"
CDS 5139..5360
/locus_tag="wEsol_00941"
/codon_start=1
/transl_table=11
/fullproduct="qcoverage 100 , hcoverage 100 , similarity
100 , identity 100 , evalue 4.86e-42 , alnlength 73 ,
Bacteria , Proteobacteria , AAS14268.1 transposase,

```

```

truncation [Wolbachia endosymbiont of Drosophila
melanogaster]"
/translation="MSQKVVNRTTGLVDYKELEANILSSIREGRPLTGRDGAFTPFIK
KLEASLEGEIENHLLAESEERVWLEEVE"
/product="transposase, truncation"
/besthit="qcoverage 100 , hcoverage 100 , similarity 100
, identity 100 , evalue 4.86e-42 , alnlength 73 ,
Bacteria , Proteobacteria , AAS14268.1 transposase,
truncation [Wolbachia endosymbiont of Drosophila
melanogaster]"
gene complement(6009..6290)
/locus_tag="wEsol_00942"
CDS complement(6009..6290)
/locus_tag="wEsol_00942"
/codon_start=1
/transl_table=11
/fullproduct="qcoverage 100 , hcoverage 100 , similarity
98.9 , identity 98.9 , evalue 1.51e-63 , alnlength 93 ,
Bacteria , Proteobacteria , CDR78524.1 hypothetical
protein WPAU_0128 [Wolbachia endosymbiont of Drosophila
simulans wAu]"
/translation="MLRWHIEECYKRLKVGAELENFSGEAVLQEFWANLVMCNILSLH
MCDAQGPWNPDQITEYRLNFSVLFGVMRQKLYQVLIAPKNFQALFKYTR"
/product="hypothetical protein"
/besthit="qcoverage 100 , hcoverage 100 , similarity 98.9
, identity 98.9 , evalue 1.51e-63 , alnlength 93 ,
Bacteria , Proteobacteria , CDR78524.1 hypothetical
protein WPAU_0128 [Wolbachia endosymbiont of Drosophila
simulans wAu]"
gene complement(6514..6798)
/locus_tag="wEsol_00943"
CDS complement(6514..6798)
/locus_tag="wEsol_00943"
/codon_start=1
/transl_table=11
/fullproduct="qcoverage 100 , hcoverage 100 , similarity
100 , identity 100 , evalue 1.51e-59 , alnlength 94 ,
Bacteria , Proteobacteria , AAS13858.1 hypothetical
protein WD_0102 [Wolbachia endosymbiont of Drosophila
melanogaster]"
/translation="MNLSWRGYRLIAADGSGMRLPSSGEIVSEFEPNGTTGTIGNLFV
DLCTSLICSARLAAWNIGEQTAAEQLPDEVITQMRLLNQEKLLFIYDRLQ"
/product="hypothetical protein"
/besthit="qcoverage 100 , hcoverage 100 , similarity 100
, identity 100 , evalue 1.51e-59 , alnlength 94 ,
Bacteria , Proteobacteria , AAS13858.1 hypothetical
protein WD_0102 [Wolbachia endosymbiont of Drosophila
melanogaster]"

```

#### ORIGIN

```

1  gtgcgacctg aaagtcttcg gtcattattgt ttaaaaggag aggaattcat tcagaaagaa
61  actgaaagga ttctaaaact tattaaccca gatgttttgc catctgagtc tacgcatcag
121 tgcgaatcgg gcaaccggtt ggtgccaaagc gatgcggaca atgaacctcc tcttgaaaaa
181 gaagatgctc aatcgtgaga gaggcataaa ctgcaagcat catgtgggtg gagggctagg
241 cttagtggta tgggtgaacgt aagtgaagct ttataagtac cgatacgatg aaagagctaa
301 agatgctgat aagctctgac caaaaggtaa tgtggataag atacattttt catctctgga
361 tgtacgcaaa taacaattcc accggtatag agaagccacc taaccactg ttgtatgact
421 ggagaaacag ggtaaagcctg tatttttcgcc tacatggcaa gcaaaccgca aggaatgctg
481 atggaagtgc aggtaaagga gaatggagaa agcgaatgcc attttgtaac gaaatggata
541 gaatttgtaa cattaattct cgtgaaaacg agcagacttc catttggtcc ctcgtgacaa
601 gaaactttgt taaccactta aggtaggaaa gcagatgatt acaagtaaac ctgtaagtgc

```

|      |             |             |             |             |             |             |
|------|-------------|-------------|-------------|-------------|-------------|-------------|
| 661  | atctaccgaa  | agctttgaag  | catggaagca  | attgccatgg  | aagaaatgcc  | agaaagttat  |
| 721  | tgtgaggcta  | caaagacgta  | ttgttaaggc  | tgtccaagaa  | ggaagatggg  | gtaaggtaaa  |
| 781  | agctttacaa  | catcttctca  | cacgctcttt  | tagcggaaaa  | gctttggctg  | ttaagagagt  |
| 841  | aactgaaaac  | caaggaaaaa  | ccacagcagg  | tgtagatcgt  | caactatggg  | caacttgcaa  |
| 901  | tgctaaattt  | caaggaataa  | agctgctaaa  | acaaagagga  | tataaacctt  | ctccgctcaa  |
| 961  | acgaatttat  | atcagtaaat  | ctaattggcaa | aagaaggcct  | cttggtatac  | ccacgataaa  |
| 1021 | agatagagcg  | atgcaagcat  | tgtatctgct  | cgcgttgga   | ccggtagctg  | aaacaatcag  |
| 1081 | tgatcgtcac  | tcttacggct  | ttagacctaa  | aagatcctgc  | gcagacgcta  | ctgtggcttg  |
| 1141 | ccacttatta  | ctggcaagtc  | gtaatcaact  | acaatggata  | ctcgaagggtg | atatcaaagg  |
| 1201 | ttgttttgat  | aacattaacc  | atgaatggct  | catgaagcat  | attcctatgg  | agaagaaaat  |
| 1261 | tcttcataga  | tggttaaaag  | ctggtttctc  | agaatcgaaa  | actctgtatc  | ccacaactgc  |
| 1321 | tggcactccg  | caaggaagta  | taatttctcc  | aatactagct  | aactttacct  | tagatgggtct |
| 1381 | tgaacagtta  | ttagaaagtc  | gctttggtaa  | attaggtagc  | aaaagaagag  | gaaaaatcag  |
| 1441 | aagtggagtg  | aatgtaatca  | ggtacgcaga  | cgactttatt  | atctcaggtt  | tcacacatga  |
| 1501 | agtactggaa  | aatgaagtta  | agccttttagt | atcatctttt  | cttcatgagc  | gaggtttaat  |
| 1561 | tctatcagaa  | gagaagacaa  | agattacatc  | tatcacaaca  | gggtttgact  | ttcttggttg  |
| 1621 | taatgtacgt  | agatataata  | agaagttaat  | tattaaacct  | tcgaaagaaa  | gtattaaaag  |
| 1681 | acttctgaat  | aaagcacgta  | cattgataaa  | agcaaataata | gcgaacactc  | aggctatagt  |
| 1741 | aattaagtca  | ctcaattctc  | tactgagagg  | atggggaaaat | tactatcacc  | atgtgtgtgc  |
| 1801 | taaaaaagcg  | tttagaaaaga | tcgacaatga  | aatttggcat  | agtttatgga  | aatgggcaaa  |
| 1861 | gaaaagacat  | cctcgtaaag  | gattacgttg  | gataaagaat  | cgttacttca  | aagtaatggg  |
| 1921 | tcaacgccaa  | tgggtttttg  | ctgcacccat  | atgcaagaac  | aaacccaaaag | agatacggta  |
| 1981 | tttaagactg  | cttaagctga  | ttgatatacc  | tatcagacga  | catgttaaaa  | tcagagcgga  |
| 2041 | tgcaaatccc  | cttgacttaa  | aatggaaaaa  | gtattttgat  | gagagagtaa  | aacgaacaag  |
| 2101 | aatgttggca  | agctcctttt  | caagagaagg  | ttctctacta  | ttagtgtcac  | cactaaagtt  |
| 2161 | gatgtattct  | gaggatttat  | gaaagacaag  | ccggttcgac  | aaaagaagaa  | cttagataag  |
| 2221 | gggctcaagc  | gtagtgtggg  | gaaacctgca  | tgctgcgttt  | ctaagggagg  | gagtagtagt  |
| 2281 | aatactgctt  | ccttacctga  | ccagctcgct  | aaaactaaag  | ataccgtctc  | gttagtcaac  |
| 2341 | aaaaaaatta  | taaaaattgt  | ctcattgctt  | aagctgtatt  | gtaaaactaa  | aaaatacttt  |
| 2401 | caattcacat  | cctgtatagc  | agtatacaag  | ttagtgtata  | tgttgataag  | taaattagtt  |
| 2461 | ttatgcatac  | aggacagcag  | aaattttactt | atcaacatat  | acactaacca  | attatattca  |
| 2521 | ataaattttgt | gtaagatacc  | atttttacata | agatagaatg  | gtagcatttt  | ttgattttta  |
| 2581 | attactaaac  | cttcactagc  | cctgtagttt  | ttgatatggt  | caggattaaa  | agcacttttg  |
| 2641 | gatctcagaa  | taccgaaaat  | gatatggagt  | agcttacgca  | ttgcagcacc  | aacgatggcc  |
| 2701 | atattatgct  | tacccttttc  | cttttaacctt | tggcaaaaac  | tcataacgat  | aggattgtga  |
| 2761 | ttcttagcta  | ctattgcagg  | aaagaaaagt  | gccttacata  | atgttcgcga  | accaacttta  |
| 2821 | cttaatctgg  | gcttggcata  | tacagatgaa  | cctgacgtta  | tatttcgtgg  | tatagctcca  |
| 2881 | gcatatgctg  | ccaattgcct  | ggcattttcta | aaagctctta  | tgttaggaac  | ttcagctaaa  |
| 2941 | atagctattg  | ctgattcctc  | tcctatgcct  | ggaatagtta  | ataaaaagttg | aaagttttct  |
| 3001 | aacaactcct  | tgtgttggtt  | tagtagttca  | tgtatggaat  | tttttattgt  | ttctattttt  |
| 3061 | tgttctatgt  | tcattgcaag  | gtctccccaa  | gcattttacaa | ctgcttttagg | cagtctctct  |
| 3121 | tttcttttcta | agtggttatt  | tagaggttgt  | ccggaaaacta | gtaaattcaa  | gcataattccc |
| 3181 | tctttaacat  | aaccctactc  | atagctaggt  | atatgaaatt  | ctcagtggat  | gttgtgagta  |
| 3241 | aatcatactc  | cttcgatagc  | cttctattcc  | tattaaccca  | agcaaaaagtc | ctttctacaa  |
| 3301 | cccatcttct  | tggctgtact  | ttaaaccctt  | gttctcttgt  | tggtagtagc  | tcagggtggcg |
| 3361 | tatcttttg   | cacccaaaat  | ctacatggag  | gccttttaac  | aatttcaata  | tctatgtcat  |
| 3421 | attcttctct  | tatgtgattc  | tttaaatttc  | ttccttggtta | tcccatgtca  | gcccacattt  |
| 3481 | ttttaacttt  | agtataattt  | gttctcata   | tgtttaaatgc | tatttttaata | ccatctctat  |
| 3541 | catttttcgtt | agcagcgcct  | acgtaacaac  | ctagtataaaa | accctgagtg  | tctgtaatta  |
| 3601 | tatgcctttt  | tctacccttt  | actttttttac | ttccatcata  | gcctttgatc  | cccccttttc  |
| 3661 | tgtagtcttt  | acagattgac  | tatctactat  | acaggcactc  | ggctgtctcat | tccttcctat  |
| 3721 | ttttcttcta  | ctataattttg | taatttcata  | attcattttc  | tcaaaaattc  | cctgcttctt  |
| 3781 | ccattgcctg  | aactgctcat  | acacagtctt  | ccatagcgga  | aaatcatttg  | gtaaaataccg |
| 3841 | ccattgacac  | cctgtacgca  | atacatagaa  | aattgcttct  | aatattttctc | ttttgctata  |
| 3901 | ctttggcggc  | cttcctcctt  | tcttgtatga  | tactctgaag  | tgtttttcta  | ttcttgccca  |
| 3961 | ttcccttttcg | cttagatctg  | ttggatactt  | ttttctcatc  | tttaccctgt  | actaaaattt  |
| 4021 | cagatattat  | agcctttttac | ttattttccgg | acaacctcta  | gttataaata  | ttgaccaatc  |
| 4081 | taataacttt  | tgattctttt  | gagaagatgt  | atatccatgt  | gacttttgcta | atttattagc  |
| 4141 | ctttcttctt  | ctagccatag  | actgttcttc  | agtttagcttt | tgacatataa  | ttcttacctt  |
| 4201 | aattttttact | tcctttccta  | ataatacttc  | tttttctgaa  | gataattgac  | cttctaaata  |

```

4261 ctccaatagc tctatTTTTT gatttgTTTT tatatcatat atattggtat cagacttata
4321 acgactaaca aaatatgcac ctgcttcac aatctgttta aaagaactag gcacaaagta
4381 gcccaagtca aatattagca aatcattggc tgataaaccg ttcagataat ccctataacc
4441 ttgatccgac cttattcctt ccataaaatt taacttatct agcgcttgat tcaggtaatc
4501 aaagactaac tgtagcttta ttcctgattt ggtattattc tcacaatctc tatagctact
4561 gccatattct ttgtacatat cttccatgct actgggcagg ataatgtagc tgctatccaa
4621 taattttaacg cttccaaatt gctgtaaaat tttgcaatca atctgtagac tttttttaaa
4681 taaacacaaa gcttcgttat acattttttt catgaactca actgcttctt cactaaacct
4741 aaaatctaaa ccctgttttg taatttctat cgagtcttca tttagcaatt ggcacattgt
4801 ttctatgctg caatcatcaa ctcctatggt accaaaaacc atagctttta tgaatgatga
4861 gccattaagt tttctctttc tttttataaa acctactgca attgatattt cgtctgcttt
4921 ttcattaaag aattcattga ggtcttttga taagcaagct attctgtcca ttgtaagttc
4981 tctcattcat atatccaaga gaatttatac cttattattt tccttcactc tatcaacttt
5041 acttacactt ttccttaact tgacgcgtat ggttcaaaaa agtgtgtcaa accaaaaaaa
5101 aagtaataaa ttgatataaa aaaaatggag gtttgacaat gagtcagaaa gtatgaaaca
5161 gaactaccgg tttggtagat tacaagaac tggaagcaaa tatactgtca tcaataaggg
5221 aaggcagacc attaacagga agggatggag catttacacc atttataaaa aagctgctgg
5281 aggcaagttt ggaaggtgaa atagaaaatc acttattagc tgaaagtgaa gagagggttt
5341 ggttggaaga agtggagtag cgaatggata taaaaaacgc tgggtctata ttcagactac
5401 agaataaggt attacaaacc gaaagcatca ccagcacaat atgttataaa ctttggtaaa
5461 gaatctgcta ggaaagcgta gtgcggatgc tgcgtttgac gaggcgggag ctggaaacgt
5521 taacatggga atttggattg aggcctattg tgaaaacaat ggatcagcca ccaaacccta
5581 aagtaggcgc gccagtctt gaccctacat atttttttga aggttaaadc cagcttaggg
5641 tcgagaaact tagataaagc catagccaaa gtgttttaaa atattaataa ttatacacac
5701 aattattcaa ccatattttt gaagatagct atgccgccgc ggtatctctt agccgctaac
5761 aagtagcggg atgacgattg ttggtaaatc taagtcagtt tagctatagg cagcaatttt
5821 ctgtatttat tttaaattga aggaagctca aatgaaagat catgttttgc taaaaatcac
5881 agaatgcagt ctaacagtga acggtcaatg gcgtcaactt aagagcctcc attagcaaac
5941 tctcctaaag acatgatggc gtttaggctt atctacttta ttgcggtgtg cccggtcgga
6001 ttttaacttt agcgcgtata cttaaaaagg gcttgaaagt tttttggcgc aataagtacc
6061 tgatagagtt tctgcctcat tacaccaaat aaaactgaaa aatttaaacg atactcagta
6121 atttgatctg ggttccaaag cccttggtgca tcacacatat gaagcgataa tatattgcac
6181 atgaccaagt ttgccccaaa ttcttgtaat acagcctctc cagaaaaatt ctctaactct
6241 gtcctacttt tgagtcgttt atagcactcc tctatgtgcc accttaacac ataagctttg
6301 ctccaaagtc tcggtcaaaa actctgtttc tcagttggct aatgtcagca ctataactct
6361 tactttctgt cctttcattt tatttttttag cttttcattt tctaataataa aatcaaaatc
6421 taattcgcca gcgttcccat agcttactat aatttctttt ttgcaagcga aaaataaaat
6481 ctacttccaa atcataatgc tgctgaatga attttactga agacgatcat agataaataa
6541 taattttctt tgatttaata aacgcatttg agtgataact tcgggtaatt gctctgccgc
6601 caacgtttgt tcacctatat tccaagctgc aagacgagca ctacaaatta gcgaagtaca
6661 caaatcaaca aacaaattgc caatggtgcc tggtgttcca tttggttcaa actcgggatac
6721 aatttcccca gagctgggta atctcatacc agaaccatct gctgcaataa gtctatagcc
6781 tctccaactc aggttcatcc tgataggctg tttggatgct taaattcttg aaagcctgta
6841 tggcaaatct tataccttgc tttagaaaaa gcttgctttg agggtagatg tcaatggctc
6901 cataagttca cattctattc ccaaactttt tttaaactaac tttaaaatca tagaaaatac
6961 tgtcgaaaaa ggaagttttc ttgttcgtgt aaaactcaac acaatggatt ttctgaaaag
7021 ttttcgagta tattataatt ttaatttgta gaataaggtt ttttcctttt tgcataattc
7081 acctaaaaag gacacatttt agacttcttt gttgaaataa aacagaaaca aaagtgtgtg
7141 ttcttgcgct ctctggataa tttaatggta aaaaatttag agagaaattt tatacactat
7201 cgctgatatt tttccttaag tt

```

//

```

LOCUS      JAQZAU010000080                5305 bp    dna        linear    ENV 17-MAR-2023
DEFINITION MAG: Wolbachia pipientis isolate wEsol contig_43512, whole genome
            shotgun sequence.
ACCESSION  JAQZAU010000080 JAQZAU010000000
VERSION    JAQZAU010000080.1
DBLINK     BioProject: PRJNA929258
            BioSample: SAMN33142973
KEYWORDS   WGS; ENV; Metagenome Assembled Genome; MAG.
SOURCE     Wolbachia pipientis (insect metagenome)

```

ORGANISM Wolbachia pipientis  
 Bacteria; Pseudomonadota; Alphaproteobacteria; Rickettsiales;  
 Anaplasmataceae; Wolbachieae; Wolbachia.

REFERENCE 1 (bases 1 to 5305)  
 AUTHORS Fiutek,N., Couger,B.M., Roy,S., de la Torre,J.R. and Connor,E.F.  
 TITLE Genomic assessment of the contribution of the Wolbachia  
 endosymbiont of Eurosta solidaginis to gall-induction  
 JOURNAL International Journal Molecular Sciences

REFERENCE 2 (bases 1 to 5305)  
 AUTHORS Fiutek,N., Couger,B.M., Roy,S., de la Torre,J.R. and Connor,E.F.  
 TITLE Direct Submission  
 JOURNAL Submitted (10-FEB-2023) Biology, San Francisco State University,  
 1600 Holloway Ave, San Francisco, CA 94132, USA

COMMENT ##Genome-Assembly-Data-START##  
 Assembly Date :: JUN-2019  
 Assembly Method :: FLYE v. 06-2019  
 Genome Representation :: Full  
 Expected Final Version :: Yes  
 Genome Coverage :: 100.0x  
 Sequencing Technology :: Illumina HiSeq; PacBio Sequel  
 ##Genome-Assembly-Data-END##

FEATURES Location/Qualifiers  
 source 1..5305  
 /organism="Wolbachia pipientis"  
 /mol\_type="genomic DNA"  
 /submitter\_seqid="contig\_43512"  
 /isolate="wEsol"  
 /isolation\_source="galls on Solidago altissima"  
 /host="Eurosta solidaginis MN-2018-EFC"  
 /db\_xref="taxon:955"  
 /environmental\_sample  
 /country="USA: Cowling Arboretum, Carleton College,  
 Northfield, MN"  
 /lat\_lon="44.48 N 93.13 W"  
 /altitude="280 m"  
 /collection\_date="2018-11"  
 /metagenome\_source="insect metagenome"  
 /note="metagenomic"  
 gene 72..434  
 /locus\_tag="wEsol\_00944"  
 CDS 72..434  
 /locus\_tag="wEsol\_00944"  
 /codon\_start=1  
 /transl\_table=11  
 /pfam="DDE\_5"  
 /fullproduct="qcoverage 91.6666666666667 , hcoverage  
 99.0990990990991 , similarity 88.2 , identity 74.5 ,  
 evaluate 1.09e-51 , alnlength 110 , Bacteria ,  
 Proteobacteria , KLT21904.1 WO-orf5-like-protein  
 [Wolbachia endosymbiont of Armadillidium vulgare str.  
 wVulC]"  
 /translation="MANESNEWAKNEFGDAVLGDKRLTDRLVKIADSLISLPRESSINE  
 ACRSWSEAKAAYRFFQENNVKEVDILASHIDKTVERTKAHKRILVIQDTTYISYSSHK  
 RIGNYCWKRSSNAYSPCC"  
 /product="WO-orf5-like-protein"  
 /besthit="qcoverage 91.6666666666667 , hcoverage  
 99.0990990990991 , similarity 88.2 , identity 74.5 ,  
 evaluate 1.09e-51 , alnlength 110 , Bacteria ,  
 Proteobacteria , KLT21904.1 WO-orf5-like-protein  
 [Wolbachia endosymbiont of Armadillidium vulgare str.

```

gene      wVulC]"
          425..718
          /locus_tag="wEsol_00945"
CDS       425..718
          /locus_tag="wEsol_00945"
          /codon_start=1
          /transl_table=11
          /product="hypothetical protein"
          /translation="MLLVVRKLGILDQKIYSRQLISEEEKRLKSHRNNVHIEDKESMKW
LESLKKTNNIIDLAQTEAITVCDREAMHDDFFELAHNLNSANFSKSLPQQKCK"
          /besthit="qcoverage 87.6288659793814 , hcoverage
58.2191780821918 , similarity 100 , identity 100 , eval
1.24e-49 , alnlength 85 , Bacteria , Proteobacteria ,
POG50451.1 hypothetical protein BK222_00145 [Wolbachia
sp. wMel_AMD]"
gene      1047..1322
          /locus_tag="wEsol_00946"
CDS       1047..1322
          /locus_tag="wEsol_00946"
          /codon_start=1
          /transl_table=11
          /fullproduct="qcoverage 100 , hcoverage 100 , similarity
98.9 , identity 98.9 , eval 2.87e-58 , alnlength 91 ,
Bacteria , Proteobacteria , CDR78440.1 hypothetical
protein WPAU_0041 [Wolbachia endosymbiont of Drosophila
simulans wAu]"
          /translation="MRWKIEILHKILKSGLKVEECRLGTAERLMRYLTVMSIIAWRIF
FITSIARTNPTLPCTALLAEKEWKVLYVKIHRKPCPNIAPTIKEAVS"
          /product="hypothetical protein"
          /besthit="qcoverage 100 , hcoverage 100 , similarity 98.9
, identity 98.9 , eval 2.87e-58 , alnlength 91 ,
Bacteria , Proteobacteria , CDR78440.1 hypothetical
protein WPAU_0041 [Wolbachia endosymbiont of Drosophila
simulans wAu]"
gene      1445..1867
          /locus_tag="wEsol_00947"
CDS       1445..1867
          /locus_tag="wEsol_00947"
          /codon_start=1
          /transl_table=11
          /product="hypothetical protein"
          /pfam="PDDEXK_2"
          /tigr="TIGR01784 T_den_put_tspse 273 conserved
hypothetical protein"
          /translation="MGNSKVSKEGSSSNTASLPDQGFARDKGFEEKRAQYYAAKAYSSQA
HKGDDQDLKGVIFIAIADFILFPNKLAYKSDHVTDFDKITYEHDLDKDFSCTFIELPKFKN
TKEDQLSNIVEKWIYFFSATLKVVLWVWLNSTFPRHRG"
          /besthit="qcoverage 82.8571428571429 , hcoverage
44.6153846153846 , similarity 93.1 , identity 91.4 ,
eval 1.67e-64 , alnlength 116 , Eukaryota , Arthropoda
, GFT78282.1 transposase [Nephila pilipes]"
gene      1867..1998
          /locus_tag="wEsol_00948"
CDS       1867..1998
          /locus_tag="wEsol_00948"
          /codon_start=1
          /transl_table=11
          /product="hypothetical protein"
          /translation="MYISHFKGWQPLGCKHEIKAGNTKPHGESLQTELDMITRGTYV"
          /besthit="qcoverage 100 , hcoverage 9.38864628820961 ,

```

```

similarity 88.4 , identity 79.1 , evalue 1.20e-16 ,
alnlength 43 , Eukaryota , Arthropoda , GFG64110.1 DNA
ligase [Trichonephila clavata]"
gene complement(2237..2548)
/locus_tag="wEsol_00949"
CDS complement(2237..2548)
/locus_tag="wEsol_00949"
/codon_start=1
/transl_table=11
/fullproduct="qcoverage 100 , hcoverage 100 , similarity
100 , identity 100 , evalue 1.60e-74 , alnlength 103 ,
Bacteria , Proteobacteria , WP_155968470.1 transposase
[Wolbachia pipientis]"
/cog="COG3335 COG3335 132 Transposase and inactivated
derivatives"
/pfam="DDE_3 DDE_1"
/product="transposase"
/translation="MTFKGGCDKEVFNTWLEKMLLPKLPHGTTIVMDNATFHKTPKTK
ELIDNARCRLLYLPTYSPDLNPIEHCWNTIKSRLRPLMHKYTDLQLLVGNTIMEIYHS
F"
/besthit="qcoverage 100 , hcoverage 100 , similarity 100
, identity 100 , evalue 1.60e-74 , alnlength 103 ,
Bacteria , Proteobacteria , WP_155968470.1 transposase
[Wolbachia pipientis]"
gene complement(2748..3095)
/locus_tag="wEsol_00950"
CDS complement(2748..3095)
/locus_tag="wEsol_00950"
/codon_start=1
/transl_table=11
/fullproduct="qcoverage 100 , hcoverage 100 , similarity
100 , identity 100 , evalue 2.74e-74 , alnlength 115 ,
Bacteria;Eukaryota , Proteobacteria;Arthropoda ,
WP_155968342.1 MULTISPECIES: IS630 transposase-related
protein [Wolbachia]"
/cog="COG3415 COG3415 138 Transposase and inactivated
derivatives"
/pfam="HTH_Tnp_IS630 HTH_Tnp_1 HTH_23 HTH_28 HTH_29 HTH_7
CENP-B_N Pfam-B_14738 HTH_8 HTH_17 HTH_24 Pfam-B_2106"
/product="IS630
transposase-related protein"
/translation="MAYSVDLRERAVSMIEKGKSKVEVAELLEIGIATLYRWLRKKAA
GESLRPSKNGSFIRKIDPKILEEYVKKNPDHTLAEMKQNLGFGINSIWYRLKQLRITL
KKSYSISRASRR"
/besthit="qcoverage 100 , hcoverage 100 , similarity 100
, identity 100 , evalue 2.74e-74 , alnlength 115 ,
Bacteria;Eukaryota , Proteobacteria;Arthropoda ,
WP_155968342.1 MULTISPECIES: IS630 transposase-related
protein [Wolbachia]"
gene complement(3174..3515)
/locus_tag="wEsol_00951"
CDS complement(3174..3515)
/locus_tag="wEsol_00951"
/codon_start=1
/transl_table=11
/fullproduct="qcoverage 100 , hcoverage 100 , similarity
100 , identity 100 , evalue 1.53e-79 , alnlength 113 ,
Bacteria , Proteobacteria , AAS13810.1 transposase, IS5
family, OrfB [Wolbachia endosymbiont of Drosophila
melanogaster]"

```

```

/cog="COG3293 COG3293 124 Transposase and inactivated
derivatives"
/pfam="DDE_Tnp_1_2 DDE_Tnp_1"
/product="transposase, IS5 family, OrfB"
/translation="MRTKYTKVKKMWADMGYQGRNLKNHIKEEYDIDIEIVKRPPCRF
WVHKDTPPELLPTREQGFKVQPRRWVVERTFAWVNRNRRLSKEYDLLTTSTENFIYLA
MSRVMLKREYA"
/besthit="qcoverage 100 , hcoverage 100 , similarity 100
, identity 100 , evalue 1.53e-79 , alnlength 113 ,
Bacteria , Proteobacteria , AAS13810.1 transposase, IS5
family, OrfB [Wolbachia endosymbiont of Drosophila
melanogaster]"
gene complement(3626..4006)
/locus_tag="wEsol_00952"
CDS complement(3626..4006)
/locus_tag="wEsol_00952"
/codon_start=1
/transl_table=11
/fullproduct="qcoverage 100 , hcoverage 100 , similarity
100 , identity 100 , evalue 1.16e-87 , alnlength 126 ,
Bacteria , Proteobacteria , AOV87106.1 transposase
[Wolbachia endosymbiont of Drosophila incompta]"
/cog="COG3293 COG3293 124 Transposase and inactivated
derivatives"
/pfam="DUF4096"
/product="transposase"
/translation="MRKKYPTDLSEREWARIKHFVRSYKKGGRPPKYSKREILEAIF
YVLRGTGCQWRYLPNDFPLWKTVYEQFRQWKKQGIFKMNIEITKYSRRKIGRNEQPSA
CIVDSQSVKTTEKGGSKAMMEVKK"
/besthit="qcoverage 100 , hcoverage 100 , similarity 100
, identity 100 , evalue 1.16e-87 , alnlength 126 ,
Bacteria , Proteobacteria , AOV87106.1 transposase
[Wolbachia endosymbiont of Drosophila incompta]"
gene complement(4085..4492)
/locus_tag="wEsol_00953"
CDS complement(4085..4492)
/locus_tag="wEsol_00953"
/codon_start=1
/transl_table=11
/pfam="DDE_Tnp_1 DDE_Tnp_1_2"
/fullproduct="qcoverage 100 , hcoverage 100 , similarity
100 , identity 100 , evalue 8.54e-92 , alnlength 135 ,
Bacteria , Proteobacteria , WP_007548764.1 MULTISPECIES:
transposase [Wolbachia]"
/translation="MLKEVDFQYVIKVLADRAYDREKLYKLCNQYGIKTKIPPKNNA
AEHPKLDYMAERNSAVKLIKSYDEDGIKKWKKEMSYGKRSYIESFFSRLKQTFGFSFR
NKSETNREKELLVKCYLLNKFTDIGMAKFEIAS"
/product="transposase"
/besthit="qcoverage 100 , hcoverage 100 , similarity 100
, identity 100 , evalue 8.54e-92 , alnlength 135 ,
Bacteria , Proteobacteria , WP_007548764.1 MULTISPECIES:
transposase [Wolbachia]"
gene complement(4512..4712)
/locus_tag="wEsol_00954"
CDS complement(4512..4712)
/locus_tag="wEsol_00954"
/codon_start=1
/transl_table=11
/fullproduct="qcoverage 100 , hcoverage 100 , similarity
98.5 , identity 98.5 , evalue 1.88e-36 , alnlength 66 ,

```

Bacteria , Proteobacteria , WP\_010082383.1 MULTISPECIES:  
 hypothetical protein [Wolbachia]"  
 /translation="MIAENNMEDIEIAIDGTGISIYNNTPGHSKENSEDRKYRSYEQT  
 RKLHVMLNTNSKKAIAVKYSNG"  
 /product="hypothetical protein"  
 /besthit="qcoverage 100 , hcoverage 100 , similarity 98.5  
 , identity 98.5 , evalue 1.88e-36 , alnlength 66 ,  
 Bacteria , Proteobacteria , WP\_010082383.1 MULTISPECIES:  
 hypothetical protein [Wolbachia]"  
 gene complement(4696..5025)  
 /locus\_tag="wEsol\_00955"  
 CDS complement(4696..5025)  
 /locus\_tag="wEsol\_00955"  
 /codon\_start=1  
 /transl\_table=11  
 /pfam="DDE\_Tnp\_1\_5"  
 /fullproduct="qcoverage 100 , hcoverage 100 , similarity  
 100 , identity 100 , evalue 1.19e-72 , alnlength 109 ,  
 Bacteria , Proteobacteria , WP\_007548762.1 MULTISPECIES:  
 transposase [Wolbachia]"  
 /translation="MPQKMRVSNHSEYNKFLEKRGNIHFYINEAIEKWYENGPKIPGG  
 NNIYSDKVVILVHIITCLFRIGLRQTVGFIAQYLEQIGKNLQVISYSQSSRRFKKLN  
 KINDCRK"  
 /product="transposase"  
 /besthit="qcoverage 100 , hcoverage 100 , similarity 100  
 , identity 100 , evalue 1.19e-72 , alnlength 109 ,  
 Bacteria , Proteobacteria , WP\_007548762.1 MULTISPECIES:  
 transposase [Wolbachia]"

# ORIGIN

```

1 tccacaaata taaatgtact tataaataaa gtattacaat attaaagttt gcaaattattg
61 aggggtataaa aatggcaaac gagagtaatg aatgggctaa aaatgaattt ggagatgctg
121 tacttgagaga taaaagatta actgaccgat tagtaaagat tgctgatagt ttgataagtt
181 tacctgaaag ctcaattaat gaggcattgca gaagttggctc agaagcaaaa gcagcatatc
241 gttttttttca aaatgagaac gtaaaagaag tcgatattct agcttcacac attgataaaa
301 cagttgaaag aacaaaagct cataaaagaa ttcttgatgat tcaagatata acttatattt
361 cactactcaag ccataagcgg attgggaact attgctggaa aaggagcagt aatgcataca
421 gcccttgctg ttagtacgga agctgggaat actggatcaa aagatttact cgaggcaact
481 catttctgaa gaagaaaaaa gactaaagag ccatcgtaac aacgttcata ttgaggataa
541 agaaagtatg aaatggctag aaagttttaa gaaaacaaat aatattatag atctggccca
601 aaccgaagct ataactgtat gtgacagaga agcagatatg catgattttt ttgaacttgc
661 acataatctt aactcagcaa atttttagtaa gagcttgcca caacagaaat gtaaataaaa
721 aattcatgca taccaggaac aagcaaaaat tatggtcatt tatccaaggc ctcccttgcg
781 ctggaaaagt agaagttgaa atccctgcta gagataacaa gcaaaaaagg acagcgtttt
841 tagaaattag attcggaaaa tttatcacat gaaggccata taaaatgtaa agaaggtcac
901 ataaaatata aaccgacaga gtctacaact tcacgcaatt catgttggtg aaaaaaactc
961 tcctcccgaa gcaagtcctc tagagtggat gcttttttcc ggtcagtact tttgaagaag
1021 ctgttgaaaa agttagttgg tattgtttga gatggaaaat agagatattg cataagattt
1081 taaaatctgg tctcaaagtt gaggaatgta gacttggaac agcagaaaaga ttaatgaggt
1141 atttaacagt catgagcatt attgcttgga gaattttctt tattacatca attgcaagaa
1201 ctaacccaac attaccatgt actgccttat tagctgagga agaattggaaa gttttatatg
1261 ttaaaatata caggaaacca tgtccaaata tagcccctac tataaaagaa gccgtttcgt
1321 gaacttgag gtcatttagc aagaaaaagc gacccaaaac caggaccaat tactctttgg
1381 aaaggggtgga gacgtctctt tgatctagca gaaggatggc gacttgctca cgaacctcat
1441 atttgtgggt aatagtaagg tttctaaggg agggagtagt agtaatactg cttccttacc
1501 tgaccagttt gctcgtgata aaggttttga gaaacgcgct caatactatg ctgctaaagc
1561 ttattcaagt caagctcaca aaggtgatca agatcttaaa ggagttattt ttattgctat
1621 cgccgatttt atcttatatt ctaacaagct ggcttacaaa tctgatcacg ttacttttga
1681 taaaattacc tatgaacatg atctcaaaga ttttagttgc actttcatcg agctaccaa
1741 gtttaataag acaaaagaag atcagctttc aaatattgtt gaaaaatgga tttatttttt
1801 tagtgcgacc ctgaaagtcg tggttttgtg gtgggttaaat tccactttcc ctagacatcg

```

```

1861 gggataatgt atatctcaca ttttaaaggg tggcaacctt tgggggtgcaa gcatgagata
1921 aaagcaggta aactaaacc tcatggtgaa tccttgcaaa cagagttaga tatgattacg
1981 agaggaacct atgtttgaat tgcgtcmeta gcatagtatg cgaaaggagg ttgaattacg
2041 catagaccaa aacggtatga agcaaaagtg gaactaaaga ttgaagactt tagttattga
2101 tgttcccagc ttccggcaaa tagtaggaat ctaagtttta cgtgaaacga agccatggaa
2161 cggagtaacc acataaaagc tcttatattc attaaaatat aagtaggtag ccaaccacaa
2221 gctgctatag tattttctaa aatgaatgat aaatttccat tatggtatta ccaacaaaaa
2281 gttgtaagtc tgtatattta tgcattaaag gtctgaggcg gcttttgatg gtattccaac
2341 aatgctctat aggggttcaaa tctgggtgaat atgttggtag atagagcaaa cggcatctag
2401 cattatctat taactccttt gttttgggag ttttatggaa tgtggcattg tcataacta
2461 ttgtagtacc atgtggcaat ttaggtaata acatcttctc taaccatgta ttgaatacct
2521 ctttgtcaca cccacctttg aaagtcattg gtgcaataaa tctctttcca atccaccgcg
2581 ctattatact gattctctct cgttttcttc ctggaatatc tgcataaatt ttctttccta
2641 ttggagcacg tccatactct cgggtataacc tattatcaac tcctgcttca tctatatata
2701 agatgctgga atggtctatt tttgagattt tatcggtaaa tcgctgccta tcttcttgat
2761 tgcgctcttg atatagtgtg actttttttt aaagtaattc ttagctgttt cagcctatac
2821 caaattgaat ttattccaaa tccaagattt tgtttcatct ctgccagcgt atgatctgga
2881 ttctttttta catattcttc gagtattttt gggctatttt ttcgaataaa gctgccgttt
2941 ttcgatggcc ttaggctttc accagcggct ttctttctta accagcggta cagagtgtct
3001 attcctatct ccaaaagctc tgccacctca accttgactc tcccttttct tatcatcgat
3061 actgcccttt cccttaaata cacactatac gccattataa ctcaaatagc ttattatacc
3121 tttatcattt actttgggaa gtactatatg aggttgtccg gaaactagta aattcaagca
3181 tattccctct ttaacataac cctactcata gctaggtata tgaaattctc agtggatggt
3241 gtgagtaaat catactcctt cgatagcctt ctattcctat taaccaagc aaaagtcctt
3301 tctacaaccc atcttcttgg ctgtacttta aacccttggt ctcttggtgg tagtagctca
3361 ggtggcgtat ctttgtgcac ccaaaatcta catggaggcc ttttaacaat ttcaatatct
3421 atgtcatatt ctccctttat gtgattcttt aaatttcttc cttggtatcc catgtcagcc
3481 cacatttttt taacttttagt atattttggt ctcatattgt ttaatgctat ttaataacca
3541 tctctatcat tttcgtttagc agcgcctacg taacaaccta gtataaaacc ctgagtgtct
3601 gtaattatat gcctttttct accctttact tttttacttc catcatagcc tttgatcccc
3661 ctttttctgt agtctttaca gattgactat ctactataca ggcactcggc tgctcattec
3721 ttcctatttt tcttctacta tattttgtaa tttcataatt cattttctca aaaattccct
3781 gcttcttcca ttgcctgaac tgctcataca cagtcttcca tagcggaaaa tcatttggtg
3841 aataccgcca ttgacaccct gtacgcaata catagaaaat tgcttcta atttctcttt
3901 tgctatactt tggcggcctt cctcctttct tgtatgatac tctgaagtgt ttttctattc
3961 ttgcccattc cctttcgctt agatctggtg gatacttttt tctcatcttt accccgtact
4021 aaaatttcag atattatagc cttttactta tttccggaca acctctaggt aacgcacaat
4081 aaatttatga agctatctca aatttagcca taccaatatc agtgaactta ttgagcaaat
4141 agcatttaac aagtagttcc ttctctctat ttgtctcaga tttattccta aaactaaacc
4201 cgaatgtttg tttcagtcgc gagaaaaaac tttctatata agatcttttt ccataactca
4261 tctctttttt ccacttcttt ataccatctt catcatatga ctttatgagc ttgactgcag
4321 aatttctctc agccatatag tctaactttg gatgctctgc tgcgttggtt ttcggaggaa
4381 ttttcgtttt tataccatat tgattacaca gcttatagag cttttctctg tcatatgccc
4441 tatctgcata tagtactttt atgacatact gaaaatcgac ttcttttagc aaatcacaa
4501 ctccatagtg atcagccggt actgtatttt acagctatgg cttttttgct gtttgtattc
4561 aacattacat gcaattttct tgtctgttca tagctgcgat actttctatc ttcgctattt
4621 tctttgctat gaccaggagt gttgttgat atactaattc ctgtaccgtc tatagcaatt
4681 tcgatatctt ccatattatt ttctgcaatc attgatctta atattgagtt tcttaaacct
4741 tcttgatgat tgtgaatagc tgataacttg caaatttttc ccaatttgct caaggtatcc
4801 tgctataaac ccaactgttt gcctcaggcc tattctaaat aaacaagtta ttatgtgcac
4861 caaaattaca actttatcgc tataaatatt gttgccacct ggtatttttg gaccattctc
4921 gtaccacttt tctatggctt cgttgatata atgaaaaata tttcctcttt tttctagaaa
4981 tttgttatat tcgctatggg tactgacct cattttttgt ggcataat tttttcaag
5041 gttaaattggc tattttataa tgaattttgt cagtagccac cagatttttt cagttgctat
5101 gcaacaaagc catcccagtg tcaagcactg ggatgacacc tttatgtttg aggcaaaacc
5161 ggccatagca tttaacacac tgccttcgca aaatgttcgt acagttgttc gttacgtgct
5221 ggaatgacaa ggtggagtggt ctttagatgt catccaagta gctgacactg ggatctaaaa
5281 aatttaattt atatataaag tttgt

```

//

LOCUS

JAQZAU010000081

1509 bp

dna

linear

ENV 17-MAR-2023

DEFINITION MAG: Wolbachia pipientis isolate wEsol contig\_43520 whole genome  
 shotgun sequence.  
 ACCESSION JAQZAU010000081 JAQZAU010000000  
 VERSION JAQZAU010000081.1  
 DBLINK BioProject: PRJNA929258  
 BioSample: SAMN33142973  
 KEYWORDS WGS; ENV; Metagenome Assembled Genome; MAG.  
 SOURCE Wolbachia pipientis (insect metagenome)  
 ORGANISM Wolbachia pipientis  
 Bacteria; Pseudomonadota; Alphaproteobacteria; Rickettsiales;  
 Anaplasmataceae; Wolbachieae; Wolbachia.  
 REFERENCE 1 (bases 1 to 1509)  
 AUTHORS Fiutek,N., Couger,B.M., Roy,S., de la Torre,J.R. and Connor,E.F.  
 TITLE Genomic assessment of the contribution of the Wolbachia  
 endosymbiont of Eurosta solidaginis to gall-induction  
 JOURNAL International Journal Molecular Sciences  
 REFERENCE 2 (bases 1 to 1509)  
 AUTHORS Fiutek,N., Couger,B.M., Roy,S., de la Torre,J.R. and Connor,E.F.  
 TITLE Direct Submission  
 JOURNAL Submitted (10-FEB-2023) Biology, San Francisco State University,  
 1600 Holloway Ave, San Francisco, CA 94132, USA  
 COMMENT ##Genome-Assembly-Data-START##  
 Assembly Date :: JUN-2019  
 Assembly Method :: FLYE v. 06-2019  
 Genome Representation :: Full  
 Expected Final Version :: Yes  
 Genome Coverage :: 100.0x  
 Sequencing Technology :: Illumina HiSeq; PacBio Sequel  
 ##Genome-Assembly-Data-END##  
 FEATURES Location/Qualifiers  
 source 1..1509  
 /organism="Wolbachia pipientis"  
 /mol\_type="genomic DNA"  
 /submitter\_seqid="contig\_43520"  
 /isolate="wEsol"  
 /isolation\_source="galls on Solidago altissima"  
 /host="Eurosta solidaginis MN-2018-EFC"  
 /db\_xref="taxon:955"  
 /environmental\_sample  
 /country="USA: Cowling Arboretum, Carleton College,  
 Northfield, MN"  
 /lat\_lon="44.48 N 93.13 W"  
 /altitude="280 m"  
 /collection\_date="2018-11"  
 /metagenome\_source="insect metagenome"  
 /note="metagenomic"  
 gene 61..441  
 /locus\_tag="wEsol\_00956"  
 CDS 61..441  
 /locus\_tag="wEsol\_00956"  
 /codon\_start=1  
 /transl\_table=11  
 /fullproduct="qcoverage 100 , hcoverage 100 , similarity  
 99.2 , identity 99.2 , evalue 3.88e-86 , alnlength 126 ,  
 Bacteria , Proteobacteria , AOV87106.1 transposase  
 [Wolbachia endosymbiont of Drosophila incompta]"  
 /cog="COG3293 COG3293 124 Transposase and inactivated  
 derivatives"  
 /pfam="DUF4096"  
 /product="transposase"

```

/translation="MRKKYPTDLSEREWARIEKHFRVSYKKGGRPPKYSKREILEAIF
CVLRTGCQWRYLPNDFPLWKTVYEQFRQWKKQGIFEKMNYEITKYSRRKIGRNEQPSA
CIVDSQSVKTTEKGGSKAMMEVKK"
/besthit="qcoverage 100 , hcoverage 100 , similarity 99.2
, identity 99.2 , evalue 3.88e-86 , alnlength 126 ,
Bacteria , Proteobacteria , AOV87106.1 transposase
[Wolbachia endosymbiont of Drosophila incompta]"
gene 552..893
/locus_tag="wEsol_00957"
CDS 552..893
/locus_tag="wEsol_00957"
/codon_start=1
/transl_table=11
/fullproduct="qcoverage 100 , hcoverage 100 , similarity
100 , identity 100 , evalue 1.53e-79 , alnlength 113 ,
Bacteria , Proteobacteria , AAS13810.1 transposase, IS5
family, OrfB [Wolbachia endosymbiont of Drosophila
melanogaster]"
/cog="COG3293 COG3293 124 Transposase and inactivated
derivatives"
/pfam="DDE_Tnp_1_2 DDE_Tnp_1"
/product="transposase, IS5 family, OrfB"
/translation="MRTKYTKVKKMWADMGYQGRNLKNHIKEEYDIDIEIVKRPPCRF
WVHKDTPPELLPTREQGFKVQPRRWVVERTFAWVNRNRRLSKEYDLLTTSTENFIYLA
MSRVMLKREYA"
/besthit="qcoverage 100 , hcoverage 100 , similarity 100
, identity 100 , evalue 1.53e-79 , alnlength 113 ,
Bacteria , Proteobacteria , AAS13810.1 transposase, IS5
family, OrfB [Wolbachia endosymbiont of Drosophila
melanogaster]"
gene complement(1048..1428)
/locus_tag="wEsol_00958"
CDS complement(1048..1428)
/locus_tag="wEsol_00958"
/codon_start=1
/transl_table=11
/fullproduct="qcoverage 100 , hcoverage 100 , similarity
100 , identity 100 , evalue 1.16e-87 , alnlength 126 ,
Bacteria , Proteobacteria , AOV87106.1 transposase
[Wolbachia endosymbiont of Drosophila incompta]"
/cog="COG3293 COG3293 124 Transposase and inactivated
derivatives"
/pfam="DUF4096"
/product="transposase"
/translation="MRKKYPTDLSEREWARIEKHFRVSYKKGGRPPKYSKREILEAIF
YVLRTGCQWRYLPNDFPLWKTVYEQFRQWKKQGIFEKMNYEITKYSRRKIGRNEQPSA
CIVDSQSVKTTEKGGSKAMMEVKK"
/besthit="qcoverage 100 , hcoverage 100 , similarity 100
, identity 100 , evalue 1.16e-87 , alnlength 126 ,
Bacteria , Proteobacteria , AOV87106.1 transposase
[Wolbachia endosymbiont of Drosophila incompta]"

```

#### ORIGIN

```

1 agaggttgct cggaaataag taaaaggcta taatatctga aatttttagta cgggggtaaag
61 atgagaaaaa agtatccaac agatctaagc gaaagggaat gggcaagaat agaaaaacac
121 ttcagagtat catacaagaa aggaggaagg ccgccaaagt atagcaaaaag agaaatatta
181 gaagcaatth tctgtgtatt gcgtacaggg tgtcaatggc ggtattttacc aaatgatttt
241 ccgctatgga agactgtgta tgagcagttc aggcaatgga agaagcaggg aatttttgag
301 aaaatgaatt atgaaattac aaaatatagt agaagaaaaa taggaaggaa tgagcagccg
361 agtgcctgta tagtagatag tcaatctgta aagactacag aaaagggggg atcaaaggct
421 atgatggaag taaaaaagta aagggtagaa aaaggcatat aattacagac actcagggtt

```

```

481 ttatactagg ttgttacgta ggcgctgcta acgaaaatga tagagatggt attaaaatag
541 cattaaacaa tatgagaaca aaatatacta aagttaaaaa aatgtgggct gacatgggat
601 accaaggaag aaatttaaag aatcacataa aggaagaata tgacatagat attgaaattg
661 ttaaaaggcc tccatgtaga ttttgggtgc acaaagatac gccacctgag ctactaccaa
721 caagagaaca aggggtttaa gtacagccaa gaagatgggt tgtagaaagg acttttgctt
781 ggggttaatag gaatagaagg ctatcgaagg agtatgattt actcacaaca tccactgaga
841 atttcatata cctagctatg agtaggggta tgtaaagag ggaatatgct tgaatttact
901 agtttccgga caacctctta gtatattttg ttctcatatt gtttaatgct attttaatac
961 catctctatc attttcggtta gcagcgccta cgtaacaacc tagtataaaa ccctgagtgt
1021 ctgtaattat atgccttttt ctacccttta cttttttact tccatcatag cttttgatcc
1081 ccccttttct gtagtcttta cagattgact atctactata caggcactcg gctgctcatt
1141 ccttcctatt tttcttctac tatattttgt aatttcataa ttcattttct caaaaattcc
1201 ctgcttcttc cattgcctga actgctcata cacagtcttc catagcggaa aatcatttgg
1261 taaataccgc cattgacacc ctgtacgcaa tacatagaaa attgcttcta atatttctct
1321 tttgctatac tttggcggcc ttcctccttt cttgtatgat actctgaagt gtttttctat
1381 tcttgcccat tccctttcgc ttagatctgt tggatacttt tttctcatct ttaccccgta
1441 ctaaaatttc agatattata gccttttact tatttccgga caacctctaa catagcaagg
1501 ggggataag

```

//

```

LOCUS      JAQZAU010000082                940 bp    dna        linear    ENV 17-MAR-2023
DEFINITION MAG: Wolbachia pipientis isolate wEsol contig_43628, whole genome
            shotgun sequence.
ACCESSION  JAQZAU010000082 JAQZAU010000000
VERSION    JAQZAU010000082.1
DBLINK     BioProject: PRJNA929258
            BioSample: SAMN33142973
KEYWORDS   WGS; ENV; Metagenome Assembled Genome; MAG.
SOURCE     Wolbachia pipientis (insect metagenome)
ORGANISM   Wolbachia pipientis
            Bacteria; Pseudomonadota; Alphaproteobacteria; Rickettsiales;
            Anaplasmataceae; Wolbachieae; Wolbachia.
REFERENCE  1 (bases 1 to 940)
AUTHORS    Fiutek,N., Couger,B.M., Roy,S., de la Torre,J.R. and Connor,E.F.
TITLE      Genomic assessment of the contribution of the Wolbachia
            endosymbiont of Eurosta solidaginis to gall-induction
JOURNAL     International Journal Molecular Sciences
REFERENCE  2 (bases 1 to 940)
AUTHORS    Fiutek,N., Couger,B.M., Roy,S., de la Torre,J.R. and Connor,E.F.
TITLE      Direct Submission
JOURNAL     Submitted (10-FEB-2023) Biology, San Francisco State University,
            1600 Holloway Ave, San Francisco, CA 94132, USA
COMMENT    ##Genome-Assembly-Data-START##
            Assembly Date      :: JUN-2019
            Assembly Method     :: FLYE v. 06-2019
            Genome Representation :: Full
            Expected Final Version :: Yes
            Genome Coverage      :: 100.0x
            Sequencing Technology :: Illumina HiSeq; PacBio Sequel
            ##Genome-Assembly-Data-END##
FEATURES   Location/Qualifiers
            source              1..940
                                /organism="Wolbachia pipientis"
                                /mol_type="genomic DNA"
                                /submitter_seqid="contig_43628"
                                /isolate="wEsol"
                                /isolation_source="galls on Solidago altissima"
                                /host="Eurosta solidaginis MN-2018-EFC"
                                /db_xref="taxon:955"
                                /environmental_sample
                                /country="USA: Cowling Arboretum, Carleton College,

```

Northfield, MN"  
 /lat\_lon="44.48 N 93.13 W"  
 /altitude="280 m"  
 /collection\_date="2018-11"  
 /metagenome\_source="insect metagenome"  
 /note="metagenomic"  
 gene complement(64..336)  
 /locus\_tag="wEsol\_00959"  
 CDS complement(64..336)  
 /locus\_tag="wEsol\_00959"  
 /codon\_start=1  
 /transl\_table=11  
 /fullproduct="qcoverage 103.333333333333 , hcoverage  
 92.0792079207921 , similarity 84.9 , identity 84.9 ,  
 evalue 3.22e-50 , alnlength 93 , Bacteria ,  
 Proteobacteria , EAL58109.1 transposase, IS5 family, OrfB  
 [Wolbachia endosymbiont of Drosophila ananassae]"  
 /cog="COG3293 COG3293 124 Transposase and inactivated  
 derivatives"  
 /pfam="DDE\_Tnp\_1\_2 DDE\_Tnp\_1"  
 /product="transposase, IS5 family, OrfB"  
 /translation="MWADMGYQGRNLKNHIKEEYDIDIEIVKRPPCRFWVHKDTPPEL  
 LPTREQGFKVQPRRWVVERTFAWVNGIEGYRRSMIYSQHPLRISYT"  
 /besthit="qcoverage 103.333333333333 , hcoverage  
 92.0792079207921 , similarity 84.9 , identity 84.9 ,  
 evalue 3.22e-50 , alnlength 93 , Bacteria ,  
 Proteobacteria , EAL58109.1 transposase, IS5 family, OrfB  
 [Wolbachia endosymbiont of Drosophila ananassae]"  
 gene complement(300..854)  
 /locus\_tag="wEsol\_00960"  
 CDS complement(300..854)  
 /locus\_tag="wEsol\_00960"  
 /codon\_start=1  
 /transl\_table=11  
 /product="hypothetical protein"  
 /pfam="DUF4096 DDE\_Tnp\_1"  
 /translation="MRKKYPTDLSEREWARIEKHFRVSYKKGGRPPKYSKREILEAIF  
 YVLRITGCQWRYLPNDFPLWKTVYEQFRQWKKQGI FEKMNYEITKYSRRKIGRNEQPSA  
 CIVDSQSVKTTERGDQGYDGSKKVKGRKRHIITDTQGFILGCYVGAANENDRDGIKIA  
 LNNMRTKYTKVKKCGLTWDTKEEI"  
 /besthit="qcoverage 94.5652173913043 , hcoverage  
 65.6603773584906 , similarity 96.0 , identity 94.8 ,  
 evalue 9.83e-115 , alnlength 174 , Bacteria ,  
 Proteobacteria , WP\_094745770.1 IS5 family transposase  
 [Wolbachia sp. wRi]"

# ORIGIN

```

1 agaggttgtc cggaaactag taaattcaag catattccct ctttaacata accctactca
61 tagctaggta tatgaaattc tcagtggatg ttgtgagtaa atcatactcc ttcgatagcc
121 ttctattcca ttaacccaag caaaagtcct ttctacaacc catcttcttg gctgtacttt
181 aaacccttgt tctcttggtg gtagtagctc aggtggcgta tctttgtgca cccaaaatct
241 acatggaggc cttttaacaa tttcaatatc tatgtcatat tcttccttta tgtgattcct
301 taaatttctt ccttggtatc ccatgtcagc ccacattttt taactttagt atattttggt
361 ctcatattgt ttaatgctat ttttaatacca tctctatcat tttcgtttag agcgctacg
421 taacaaccta gtataaaacc ctgagtgtct gtaattatat gcctttttct accctttact
481 tttttacttc catcatagcc ttgatccccc ctttctgtag tctttacaga ttgactatct
541 actatacagg cactcggtcg ctcattccct cctatttttt ttctactata ttttgaatt
601 tcataattca ttttctcaaa aattccctgc ttcttccatt gcctgaactg ctcatacaca
661 gtcttccata gcggaaaatc atttggtaaa taccgccatt gacaccctgt acgcaatata
721 tagaaaattg cttctaatat ttctcttttg ctatactttg gcggccttcc tcctttcttg
781 tatgatactc tgaagtgttt ttctattcct gcccatcccc tttcgcttag atctgttga

```

841 tactttttttc tcattctttac cccgtactaa aatttcagat attatagcct tttacttatt  
901 tccggacaac ctctcagtgt caaaaaacat actattgcta

//

LOCUS JAQZAU010000083 19378 bp dna linear ENV 17-MAR-2023  
DEFINITION MAG: Wolbachia pipientis isolate wEsol contig\_44164, whole genome  
shotgun sequence.  
ACCESSION JAQZAU010000083 JAQZAU010000000  
VERSION JAQZAU010000083.1  
DBLINK BioProject: PRJNA929258  
BioSample: SAMN33142973  
KEYWORDS WGS; ENV; Metagenome Assembled Genome; MAG.  
SOURCE Wolbachia pipientis (insect metagenome)  
ORGANISM Wolbachia pipientis  
Bacteria; Pseudomonadota; Alphaproteobacteria; Rickettsiales;  
Anaplasmataceae; Wolbachieae; Wolbachia.  
REFERENCE 1 (bases 1 to 19378)  
AUTHORS Fiutek,N., Couger,B.M., Roy,S., de la Torre,J.R. and Connor,E.F.  
TITLE Genomic assessment of the contribution of the Wolbachia  
endosymbiont of Eurosta solidaginis to gall-induction  
JOURNAL International Journal Molecular Sciences  
REFERENCE 2 (bases 1 to 19378)  
AUTHORS Fiutek,N., Couger,B.M., Roy,S., de la Torre,J.R. and Connor,E.F.  
TITLE Direct Submission  
JOURNAL Submitted (10-FEB-2023) Biology, San Francisco State University,  
1600 Holloway Ave, San Francisco, CA 94132, USA  
COMMENT ##Genome-Assembly-Data-START##  
Assembly Date :: JUN-2019  
Assembly Method :: FLYE v. 06-2019  
Genome Representation :: Full  
Expected Final Version :: Yes  
Genome Coverage :: 100.0x  
Sequencing Technology :: Illumina HiSeq; PacBio Sequel  
##Genome-Assembly-Data-END##  
FEATURES Location/Qualifiers  
source 1..19378  
/organism="Wolbachia pipientis"  
/mol\_type="genomic DNA"  
/submitter\_seqid="contig\_44164"  
/isolate="wEsol"  
/isolation\_source="galls on Solidago altissima"  
/host="Eurosta solidaginis MN-2018-EFC"  
/db\_xref="taxon:955"  
/environmental\_sample  
/country="USA: Cowling Arboretum, Carleton College,  
Northfield, MN"  
/lat\_lon="44.48 N 93.13 W"  
/altitude="280 m"  
/collection\_date="2018-11"  
/metagenome\_source="insect metagenome"  
/note="metagenomic"  
gene complement(<1..92)  
/locus\_tag="wEsol\_00961"  
CDS complement(<1..92)  
/locus\_tag="wEsol\_00961"  
/codon\_start=1  
/transl\_table=11  
/fullproduct="qcoverage 100 , hcoverage 90.9090909090909  
, similarity 100 , identity 100 , evaluate 4.93e-11 ,  
alnlength 30 , Bacteria , Proteobacteria , ONI57697.1  
hypothetical protein N499\_0645, partial [Wolbachia

```

pipientis wVitA]"
/translation="MLVITEIIFTKDIYEIIDIWVKYVYYRTLI"
/product="hypothetical protein N499_0645,
partial"
/besthit="qcoverage 100 , hcoverage 90.9090909090909 ,
similarity 100 , identity 100 , evalue 4.93e-11 ,
alnlength 30 , Bacteria , Proteobacteria , ONI57697.1
hypothetical protein N499_0645, partial [Wolbachia
pipientis wVitA]"
gene 523..1590
/locus_tag="wEsol_00962"
CDS 523..1590
/locus_tag="wEsol_00962"
/codon_start=1
/transl_table=11
/fullproduct="qcoverage 100 , hcoverage 100 , similarity
100 , identity 100 , evalue 1.32e-245 , alnlength 355 ,
Bacteria , Proteobacteria , WP_010963008.1 MULTISPECIES:
recombinase RecA [Wolbachia]"
/cog="RecA COG0468 279 RecA/RadA recombinase"
/pfam="RecA Rad51 Pfam-B_53 KaiC AAA_25 Pfam-B_811
Arch_ATPase Pfam-B_7166 MobB AAA"
/tigr="TIGR02012 tigrfam_recA 321 protein RecA"
/product="recombinase RecA"
/translation="MASNPEERNSDKQKALDNAISQIEKAFGKGAIMKLKQNPVEKID
TISTGSIALDSALGVGGLPKGRIIEIFGPRESSGKTTLALHVIAEAQKKGGSCAFIDAE
HALDVLVYARKLGVSTDDLVISQPDTGEQALHIVEYLVCSGAVDVIVIDSVAALTPRAE
IEGDMGDQHMGLQARLLSHGLRKLTSVSKANCILIFINQIRMKIGVVYGNPETTTGG
NALKFYTSVRLDIRKVGVIKDKENITGNETRVKVVKNKVAPPFREAKFDIMYNEGISK
LGEIIDMGAKLGVLEKAGAYYSYNNTRLGQGRENVKTYLKTNKEVANEIETKIRDLLR
NHDNSIIIDEDSEQLLEESVF"
/besthit="qcoverage 100 , hcoverage 100 , similarity 100
, identity 100 , evalue 1.32e-245 , alnlength 355 ,
Bacteria , Proteobacteria , WP_010963008.1 MULTISPECIES:
recombinase RecA [Wolbachia]"
gene 1778..2470
/locus_tag="wEsol_00963"
CDS 1778..2470
/locus_tag="wEsol_00963"
/codon_start=1
/transl_table=11
/fullproduct="qcoverage 100 , hcoverage 100 , similarity
100 , identity 100 , evalue 4.15e-159 , alnlength 230 ,
Bacteria , Proteobacteria , WP_007548750.1 MULTISPECIES:
phosphatidylserine decarboxylase [Wolbachia]"
/cog="Psd COG0688 239 Phosphatidylserine decarboxylase"
/pfam="Pfam-B_3938 PS_Dcarbxyase"
/tigr="TIGR00164 PS_decarb_rel 215 phosphatidylserine
decarboxylase homolog"
/product="phosphatidylserine
decarboxylase"
/translation="MCFGLPNINREGYSFIVVSFIVTCIAFSISWGFGVTCLFPTLLC
TYFFRDPARAVPNNKNLILSPADGVISKIEEVNYPLSAENGEEKKFTLVISIFLSVLNV
HVNRIPISGTIKEMSYKKGKFVSAMSNRSSNENEKQVIVIEYEKGKEIIVEQIAGLIA
RRIVCNLGISQNVKAGERFGIIRFGSRVNIYVPADTEVRVSEGTQVIGGETIIANLNK
ENVQEKLTFDVI"
/besthit="qcoverage 100 , hcoverage 100 , similarity 100
, identity 100 , evalue 4.15e-159 , alnlength 230 ,
Bacteria , Proteobacteria , WP_007548750.1 MULTISPECIES:
phosphatidylserine decarboxylase [Wolbachia]"

```

```

gene      2467..3237
          /locus_tag="wEsol_00964"
CDS       2467..3237
          /locus_tag="wEsol_00964"
          /codon_start=1
          /transl_table=11
          /fullproduct="qcoverage 100 , hcoverage 100 , similarity
100 , identity 100 , evalue 2.31e-178 , alnlength 256 ,
Bacteria , Proteobacteria , WP_015589351.1 MULTISPECIES:
CDP-alcohol phosphatidyltransferase family protein
[Wolbachia]"
          /cog="PssA COG1183 234 Phosphatidylserine synthase"
          /pfam="CDP-OH_P_transf CDP-OH_P_tran_2"
          /product="CDP-alcohol
phosphatidyltransferase family protein"
          /translation="MNNDGSGNSRFLPITKLPNPFITLLGLCSGLTSLKFTFNEQWEFS
VIFIIIAAIDGMDGRIARILKSTSDFGAQLDSFADFLNFGAAPAFLLYFWKLNEIKV
IGWILVMIYVICISIRLARFNVSLHSEQPYWEKFFFSGVPAPVCALLSLLPIIITFQS
HESEYLLLIERFFNTRNVACYFLAISFFSISHIPTFSAKYIYIPKSLSYIFVSFFGVL
IVFFISKPWMTLPILGIVYTLTIPISIGFYIYFTYKTR"
          /besthit="qcoverage 100 , hcoverage 100 , similarity 100
, identity 100 , evalue 2.31e-178 , alnlength 256 ,
Bacteria , Proteobacteria , WP_015589351.1 MULTISPECIES:
CDP-alcohol phosphatidyltransferase family protein
[Wolbachia]"
gene      3260..4603
          /locus_tag="wEsol_00965"
CDS       3260..4603
          /locus_tag="wEsol_00965"
          /codon_start=1
          /transl_table=11
          /fullproduct="qcoverage 100 , hcoverage 100 , similarity
100 , identity 100 , evalue 3.31e-297 , alnlength 447 ,
Bacteria , Proteobacteria , WP_015589350.1 MULTISPECIES:
amino acid carrier protein [unclassified Wolbachia]"
          /cog="AlsT COG1115 452 Na+/alanine symporter"
          /pfam="Na_Ala_symp AA_permease_2"
          /tigr="TIGR00835 agcS 424 amino acid carrier protein"
          /product="amino acid carrier
protein"
          /translation="MILKISELLNSFLYIKIFNIPFIIIWVIATGIFCTAQFKFINFR
LLKYGIQTLFNLKCNSNNGIITHIQAFATVISGTVGLGTISGVAIAITIGGPSAVFW
MVITGILGMSIKFAEVVLAFTYRSENTTGGAFYYMKYGLAKIGFAKTGRFLAFTYAIM
LLIAMILGGIPFQANQIAALSNNLLEYNASIIISLLVFIVILGGIKRIAFVSTSLAPI
MIVLYVGMCIYLIYVNGSNLLNALSIIIFQDIFNKSAIGSGVLSGLIAGVRRSVFANEA
GTGTAAIAHSAVKEEDPIKVGCVAMIAPLIDTILISFLTGIVIIITGMHSTDNVGDIT
LISSIFSTALPLFSKLVFPLMMFSFAFSTIIAYCYCEVALLYLFGSKKILIPFQILI
VVSUYISCMSKNIEFISYLGDSLFLMCLMIPNAVAIYLLRREVLSTIDSYYNSKRY"
          /besthit="qcoverage 100 , hcoverage 100 , similarity 100
, identity 100 , evalue 3.31e-297 , alnlength 447 ,
Bacteria , Proteobacteria , WP_015589350.1 MULTISPECIES:
amino acid carrier protein [unclassified Wolbachia]"
gene      4606..6072
          /locus_tag="wEsol_00966"
CDS       4606..6072
          /locus_tag="wEsol_00966"
          /codon_start=1
          /transl_table=11
          /fullproduct="qcoverage 100 , hcoverage 100 , similarity
100 , identity 100 , evalue 0.0 , alnlength 488 ,

```

```

Bacteria , Proteobacteria , WP_015589349.1 MULTISPECIES:
amino acid carrier protein [unclassified Wolbachia]"
/cog="AlsT COG1115 452 Na+/alanine symporter"
/pfam="Na_Ala_symp Spore_permease"
/tigr="TIGR00835 agcS 424 amino acid carrier protein"
/product="amino acid carrier
protein"
/translation="MTYRLLCMVLFCLLFNDAHAASGFYESYDAVLNGINNFNMNEVLF
FKILYVPFIILLVFGYVFLTLRFGFLNIRMFKHAFAILCGKYDTNHHHDGHITHFQAF
MTALSSTVGLGTVAGVAIAVSMGGPGAVPWWMITGFFGMSAKFAEVTLAFRHRTEDQD
QLFSGPFPQYIRNGLEEFQFKKLGIVLAAMYAVFFVLSGLGGSVAFQTNQMVSILSGYS
SWVDGHSWFLSSIISALLALVIIGGIKRIARVSSALVPIMSLIYIFSCIIIIAFNIHN
LGYTLKILFSTMIDFNAVGGGMVGAFAVAGIQRAIFASEAGVGSASITHATTKDEEPPVR
TGLVAMIEPCFDTMLICCLTGITIVITGAYQTGVGEGILITQKAFETVSPWFPILLTV
AAPLFAFSSVISFVYCCMGWLYLFGAKSIVIYRIAVIIVAFFSGLSKDIMAIANIGG
TLFSLALINMTALILFSNQINDEVQCYLKRLRNNKIN"
/besthit="qcoverage 100 , hcoverage 100 , similarity 100
, identity 100 , evalule 0.0 , alnlength 488 , Bacteria ,
Proteobacteria , WP_015589349.1 MULTISPECIES: amino acid
carrier protein [unclassified Wolbachia]"
gene 6282..6953
/locus_tag="wEsol_00967"
CDS 6282..6953
/locus_tag="wEsol_00967"
/codon_start=1
/transl_table=11
/fullproduct="qcoverage 85.2017937219731 , hcoverage 100
, similarity 100 , identity 100 , evalule 4.75e-122 ,
alnlength 190 , Bacteria , Proteobacteria ,
WP_015589348.1 MULTISPECIES: glycerol-3-phosphate
1-O-acyltransferase PlsY [unclassified Wolbachia]"
/cog="COG0344 COG0344 200 Predicted membrane protein"
/pfam="G3P_acyltransf"
/tigr="TIGR00023 TIGR00023 196 acyl-phosphate glycerol
3-phosphate acyltransferase"
/product="
glycerol-3-phosphate 1-O-acyltransferase PlsY"
/translation="MTPFWYSDDTKRNAGTTSFKATNCLQITTTVDMERYVILILSY
ILGSIPFSLIITRIKGINLREIGSGNIGATNVARTGNKFLAALALLLDSFKGFIAYVI
AQQFFDDNLICIYISAILAVLGHMFVWLKFSGGKGVATTGILIAFNIDITLVFVIIW
IIVFLAFRYSSLASLSATSTAVAWSFFFQRNLFLLTLLIIGALVFLKHHRNIVNLLQKG
ENKFL"
/besthit="qcoverage 85.2017937219731 , hcoverage 100 ,
similarity 100 , identity 100 , evalule 4.75e-122 ,
alnlength 190 , Bacteria , Proteobacteria ,
WP_015589348.1 MULTISPECIES: glycerol-3-phosphate
1-O-acyltransferase PlsY [unclassified Wolbachia]"
gene complement(6948..8744)
/locus_tag="wEsol_00968"
CDS complement(6948..8744)
/locus_tag="wEsol_00968"
/codon_start=1
/transl_table=11
/fullproduct="qcoverage 100 , hcoverage 100 , similarity
100 , identity 100 , evalule 0.0 , alnlength 598 ,
Bacteria , Proteobacteria , WP_015589347.1 MULTISPECIES:
hypothetical protein [unclassified Wolbachia]"
/translation="MIGISQIQFPSKESSRLKFVSFYFATFVSLSIITNPVNVLFSLGT
IFFRSEIKTLYIYKEIKTAKQQKMSKREYWEIFFKNNTIKVAAFLLFSAFITYLTFTT
TFLLISLLGTIPLTMLLVLLQSELRPKDFNPFTLLKASINFFLEGIKENLRGMVNSFD

```

```

VKLEHLLPHQLNDDIIKNIDKLKDKYGEKVSEDEVINDREFKQFIEYINDLNELNYRQF
SDEDKGRVITFLNDFCKDDQKHSSGFTGGQILLVLKACNDGDREAVKNKKDALITNL
LDSQTFSRKERIPNTCFTGIVYRMLSTLEGIHPDPEIRFTAPQQISISEAKNEARKFM
LDRLKNKKSKEILKAWYKAQNDPNDESQKIVDNFISEVSIPLMRKLLSFTSQYSEQI
VLMLMKDISSIKLVEFLDERLSFYIAQETNTRCCADIKEKVFELELLNQNLKTDLSLK
DSSVDEAKRIASKIIIGEVKFRSEAVEKARKVNPVQVQVATLQNLALPREKKCCI
AYSRLSSQYKGDEREIMENILLKKLEITKKEMNKMLEENDIRKLKLALDDACKKSGKS
MEEMIKVEVEEVSSRFSHEVSVSNIAAESACL"
/product="hypothetical protein"
/besthit="qcoverage 100 , hcoverage 100 , similarity 100
, identity 100 , evalue 0.0 , alnlength 598 , Bacteria ,
Proteobacteria , WP_015589347.1 MULTISPECIES:
hypothetical protein [unclassified Wolbachia]"
gene complement(8797..9693)
/locus_tag="wEsol_00969"
CDS complement(8797..9693)
/locus_tag="wEsol_00969"
/codon_start=1
/transl_table=11
/fullproduct="qcoverage 100 , hcoverage 100 , similarity
100 , identity 100 , evalue 8.08e-200 , alnlength 298 ,
Bacteria , Proteobacteria , WP_015589346.1 MULTISPECIES:
cation diffusion facilitator family transporter
[unclassified Wolbachia]"
/cog="CzcD COG1230 296 Co/Zn/Cd efflux system component"
/pfam="Cation_efflux"
/tigr="TIGR01297 CDF 285 cation diffusion facilitator
family transporter"
/product="cation diffusion
facilitator family transporter"
/translation="MTAVHNGKHSAAQSKRLIYSIIIVAITMFMEIVGGIISHSLALL
SDAGHMLTDLFALVLSWLAHRFSAKKSDLQRSYGYHRLQIIAAAFVNGLTFLIAVIII
IESIKRFIFPVNVEWKVMLIIATLGLISNIIVFFILHSKCESNINIKSAVLHVIGDIL
GSVAAILASIIIMLTGWQIVDPILSVFVSVIILNSGYKILKNSCHILLEGTPEGISAE
EIKSKITSELPEVIDVHHIHTWSLSDNYFIITMHAKIKQNVQHTNVLYEIKKILLDKF
EIAHSTVEIEYDECADNKILKH"
/besthit="qcoverage 100 , hcoverage 100 , similarity 100
, identity 100 , evalue 8.08e-200 , alnlength 298 ,
Bacteria , Proteobacteria , WP_015589346.1 MULTISPECIES:
cation diffusion facilitator family transporter
[unclassified Wolbachia]"
gene 10044..13421
/locus_tag="wEsol_00970"
CDS 10044..13421
/locus_tag="wEsol_00970"
/codon_start=1
/transl_table=11
/pfam="Peptidase_MA_2"
/fullproduct="qcoverage 100 , hcoverage 100 , similarity
100 , identity 100 , evalue 0.0 , alnlength 1125 ,
Bacteria , Proteobacteria , WP_174516957.1 MULTISPECIES:
peptidase M2 [unclassified Wolbachia]"
/translation="MAINQQVNKNITKEEYFNNNGKGFNSPHVIEVEDLNKVEVYSH
NLRASKVANIESEIRETATSFKDTFKLERGSSEQTFKIYMFDDKDDYTHLGGSERFGS
YLGDDEGGKCYKKGKADVFAEMYVYQQGGVHNLQHEFAHGLTYLATGGKSLPTVLMEGI
ADYFEHHS DHKFNSQGSSIDKTEANLDDLKILSLEYSKDSEANSLVYKTGHALIMYL
QEKDPSSLRDYLDALRQGNSESKSFLKDIKGHDTDFKSWLAENDTETAMEHLNALQV
TKGDFIATGQEIVGGEIKNVSYKANIEKMDGENVGFSFSPVEHVAFYDVARAINRATN
DTLDISKEYHFLKVVKTSDBGQDKLTYSQQGNEYRNSLEYKNQAFRMLSKYDENLKA
YDDALKNLDEQRQMEYPKINKEYSEGKISYEEYS DKYYSIPSKYEELKSTLLDETINT

```

```

GLEQVKATKNIDVEKMLEEMINIDSNLIRGTNHIDLQEGKIFSMQAHGQGDMGALSIY
DGNTKLGELLESESGFFKQVEGQTKETFFVFEILHNLNVSYEGGAYMAVTKENGHYKAS
LIDGRTVERDEYFDEAHLHENELLHPSTGHIQKDLDSLRLRGTKILNHQDSEHAQYSD
EQKANGVIVEKGKLLDNKGTDRTPDDVVEAVVKQGDERLHEFKNMGFYITEKGDLFIH
DHGANVRFQLPQSITHLKLVEKDGAYKLVPTKDGNEHPGMPNISDEYRYIDPIFAH
EYEKRDYSHKHVNVGLINLEKYGSGKLFYKIDPNDYHIQRNSSGEIVRIKDQTYFTK
VKLFDGDEEIGMLSNNFHNFKGKIFFSADYNYSYNDFLASVSPQVEIEDMGNGSKKIT
FDQSGDIGDTNRGYTDYQRIYTKTESPKGQVSETKTEVHSTTNVVAQAAEEKTASND
NSEMQSDQPQIPTRAKRSASVEEKEQEQQVLKDTILKIEKSYEQDSEGKHKANVTIDY
NDVKALYDRAEGAQSVLDFWNKLHTSEYKVGALPEDKYYFEKGKFIHDSDTKKLI
VLPEDKVSIMKDGDSYSLAISSGNGKVISSISKIDNPNYELLSDSSSHFNSEEQDNI
VLSQDQHHEYNLYLENGFVKMFDCASDHIYHDHNSAYI"
/product="peptidase M2"
/besthit="qcoverage 100 , hcoverage 100 , similarity 100
, identity 100 , evalue 0.0 , alnlength 1125 , Bacteria ,
Proteobacteria , WP_174516957.1 MULTISPECIES: peptidase
M2 [unclassified Wolbachia]"
gene 14070..15719
/locus_tag="wEsol_00971"
CDS 14070..15719
/locus_tag="wEsol_00971"
/codon_start=1
/transl_table=11
/product="hypothetical protein"
/pfam="DUF4411 Pfam-B_12130 Pfam-B_12130 Pfam-B_677
Collagen Pfam-B_798"
/translation="MHAMVFIINGECDMTLDEPLEESLINNNDFVNALLAKLKAGADD
NGVYTKKGVDDELKKKADTAALTNKADKNYVDTELKKANSANLAAKANTADVTKKN
VDDELAKKADTAALANKADKNYVDTELGKKANSADLAAKANTADVTKKNVDDELAKK
ADTAALANKADKNYVDTELGKKAGAADLANKANTADVTKKNVDDELAKKADTAALAD
KTDKNYVDTELGKKANSADLAAKANTADVTKKNVDDELAKKADTAALANKADKNYVD
TELGKKAGAADLANKANTADVTKKNVDDELAKKADTAALADKTDKNYVDTELGKKAN
SADLAAKANTADVTKKNVDDELAKKADTAALANKADKNYVDTELGKKANTADVTKT
AADTAFKINASNLI EAVNKKAFKAILPAKDGDKSILVDKLGGLDADTAYGDKND
QTAKVFLGGKGLKGETGATGPKGADGKDGAQGPQGETGETGADGKSPTAAEIAAEKAL
QEHVTKISIQSPEFKRAVQEEMSQPYFEPPTSDDAALNWTW"
/besthit="qcoverage 101.092896174863 , hcoverage
181.967213114754 , similarity 47.7 , identity 47.0 ,
evalue 4.90e-59 , alnlength 555 , Bacteria ,
Proteobacteria , WP_213863631.1 hypothetical protein
[Wolbachia endosymbiont of Ceratitis capitata]"
gene complement(16472..17749)
/locus_tag="wEsol_00972"
CDS complement(16472..17749)
/locus_tag="wEsol_00972"
/codon_start=1
/transl_table=11
/fullproduct="qcoverage 100 , hcoverage 100 , similarity
100 , identity 100 , evalue 2.76e-303 , alnlength 425 ,
Bacteria , Proteobacteria , WP_015589344.1 MULTISPECIES:
serine hydroxymethyltransferase [unclassified Wolbachia]"
/cog="GlyA COG0112 413 Glycine/serine
hydroxymethyltransferase"
/pfam="SHMT Aminotran_1_2 Beta_elim_lyase
DegT_DnrJ_EryC1"
/tigr="TIGR00858 bioF 365 8-amino-7-oxononanoate
synthase"
/product="serine
hydroxymethyltransferase"
/translation="MMSVLKKICGSKNSLKSFDNEVYQSIEKELQRQKSQQLIASEN

```

```

FASKAVMEAQGSFLTNNKYAEGYPGKRYYCGCEHVDKIESLAIERLCKLFGVKFANVQP
HSGSQANQAVFASLLAPGDTILGLSLNCGGHLTHGAAPSLSGKWFKSVQYTVNKDITYL
LDMDEIEKLALALEHKPKLIIAGASAYPRKMDFKRFREIADKVGAYLLADIAHYAGLIAA
GEYPSPAEYAHVMTSTTHKTLRGPRGGIVMTNDEALHKKIQSAVFPGLQGGPLMHVIA
AKAVAFKEALAPEFKTYSKKVVENAKVLAQELQKHGLDIITGGTDSHIVLVDLRSQKL
TGKDVVDSLERAGITCNKNSVPFDTAKPTITSGLRFGTAAETTRGLEAENFKEIAGLI
NEVIQGLISGNSSSVEKAVKAKVERICSNFPIY"
/blasthit="qcoverage 100 , hcoverage 100 , similarity 100
, identity 100 , evalue 2.76e-303 , alnlength 425 ,
Bacteria , Proteobacteria , WP_015589344.1 MULTISPECIES:
serine hydroxymethyltransferase [unclassified Wolbachia]"
gene complement(17790..19010)
/locus_tag="wEsol_00973"
CDS complement(17790..19010)
/locus_tag="wEsol_00973"
/codon_start=1
/transl_table=11
/fullproduct="qcoverage 100 , hcoverage 100 , similarity
100 , identity 100 , evalue 5.17e-287 , alnlength 406 ,
Bacteria , Proteobacteria , WP_141457298.1 MFS
transporter [Wolbachia endosymbiont of Carposina
sasakii]"
/cog="ProP COG0477 338 Permeases of the major facilitator
superfamily"
/pfam="MFS_1 Sugar_tr"
/product="MFS transporter"
/translation="MSKSNFFVWLIVSLFYAYQYVLRVMPNIIAPVLITKFNISIADL
GQFNGLYYVGFTLVHIPVGLCFDRFGPKIVLPICAVLVSIGTLPLVCFDEWYYSVLGR
IIVGIGSSASVIGVFKVASMYFSREKSASMASISVIIGLLGAIYGGLPiELLLDEFGW
NYVIYIILSGFGFLLALSFLVIPYNAYNFRKEKISMKDLKTVLFNKYIILISFFGGML
VGPLEGFADAWTKAFLCEVYQMAGDLASSISSVIYVGFAAGLLSFAHILEKYPNRHYE
VIIIVCSFAMIASFLLLFTQAGGLYIVLPALLVIGFASGYQIVTLYKALSYVNNNLIGL
TTAVSNMIVMVFGYFFHTGIAKIIDLCDWDRTVIQGNPVYSAELLIKATSIIPVCLLIA
VFGLLWLKKQDKQS"
/blasthit="qcoverage 100 , hcoverage 100 , similarity 100
, identity 100 , evalue 5.17e-287 , alnlength 406 ,
Bacteria , Proteobacteria , WP_141457298.1 MFS
transporter [Wolbachia endosymbiont of Carposina
sasakii]"
gene complement(19146..>19378)
/locus_tag="wEsol_00974"
CDS complement(19146..>19378)
/locus_tag="wEsol_00974"
/codon_start=1
/transl_table=11
/product="hypothetical protein"
/translation="TAVSNMIVMVFGYFFHTGIAKIVDLCWDRVTIIQGNPVYGAELLI
KATSVIPVCLLVAVFGLLWLKNKDFREVDCKN"
/blasthit="qcoverage 100 , hcoverage 19.047619047619 ,
similarity 100 , identity 100 , evalue 1.06e-45 ,
alnlength 76 , Bacteria , Proteobacteria , WP_103412397.1
MFS transporter [Wolbachia sp. wRi]"
gene complement(9720..9792)
/locus_tag="wEsol_tRNA-17"
tRNA complement(9720..9792)
/locus_tag="wEsol_tRNA-17"
/gene="tRNA-Val"
/intronpos="0..0"
/program="tRNAscan-SE"
/cove_score="68.5"

```

```

/evidence=predicted
/type="Val"
/anticodon=GAC
/product="tRNA-Val (GAC)"

```

ORIGIN

```

1  actattaatg ttctataata tacatatattc caaactatgt caattatttc ataaatatct
61  ttggtaaaaa ttatttctgt tatgactagc atgataagtg tatgaagcga ctaaaattgt
121 cattacagcg cttagtgtac gacagtgtc caacatttag ggttgcagtt ttcattggcag
181 atctgagtag ctgacccatc taagaggtgt cattcaagta gctgacactg gaatggcttt
241 gttgcatcgc accttatacg gtagtaattt acaataaatt catgtagcca tttcgaattt
301 agtcattttca gtgttggcta cttggatgac accacctgct atgctgcaaa ttgcaacggt
361 cgtacactaa agtatagtgt gttactaacg aaggcaaaca aatatctgct ttatgaaaac
421 gttaatatatt ttcattgaaa taatacataa atactagaaa aaccttggca ggttattcgc
481 gtttgattat catagagaat tatataaatt aataaatgat ctatggcaag taaccagaa
541 gaaagaaata gtgataaaca aaaagcgcta gataacgcaa taagccagat tgaaaaagca
601 ttcggtaaag gtgcaataat gaagttgaag caaaaccctg tagaaaaaat agacacaata
661 tccacaggat caattgcgct tgattcggct ctaggtgttg gaggtctgcc aaaagggcgt
721 ataattgaaa tatttggccc cgagagttct ggtaaaacca ctcttgccct gcacgtgatt
781 gctgaagcac aaaaaaaagg aggatcatgc gcatttatcg atgcagaaca tgcattggat
841 gtcttatatg ctcgtaaaact tggggtaagc actgatgatt tagtgatttc acaaccagac
901 actggagagc aggcgttgca tattgttgag tatttagtgt gttctggtgc ggttgatgtg
961 atagttattg actctgtcgc agcattaact ccaagagctg aaattgaagg tgatatgggt
1021 gatcaacata tggggctgca agcaaggctt ctaagtcatg ggctacggaa actaacctct
1081 gccgtttcaa aagcgaactg tatattgata ttattaatc aaattcgtat gaaaatagga
1141 gtagtgtatg gaaatcctga aactaccacg ggtggaaatg cattaaaatt ctatacttct
1201 gtaaggcttg atataagaaa agttggtgta ataaaagaca aagaaaatat tacaggtaat
1261 gaaacaagag ttaaagttgt aaaaaataaa gttgctcctc catttagaga agcgaaattt
1321 gatataatgt acaatgaagg tatatcaaaa ctcgagagaaa taatagatat gggagcaaag
1381 cttggtgtgc ttgaaaaagc aggcgcttac tattcatata acaacacacg tcttgggcaa
1441 ggaagagaga atgtaaaaac ttacctaaaa acaaacaaag aagtcgcaaa tgaaatagaa
1501 acgaaaatca gagatttact cagaaatcat gataattcta tcataataga cgaggatagt
1561 gagcaacttt tagaagaatc agttttctga tctaaactta ggcattagat tttgtgttgg
1621 acgggttggt acagtatgac ggtaattcta tgtgctaata taacaatctg taatgttacc
1681 ttgtatcaaa aagactttgc tgaagcagtt aaaaaaagct tttcatgaga aattataaat
1741 gataaattgt taacaatagg ttattgttaa taagattatg tgttttgggt tacctaatat
1801 aaacagggaa gggtattcat ttatagtagt ttcttttata gtaacgtgta tagcattctc
1861 tatactcttg gggtttgccg ttacgtgctt gtttccgaca ttattgtgta cttatttctt
1921 tcgtgatcca gcaagagctg tgccaaacaa taagaatctt atattaagtc ctgctgatgg
1981 tgtgatttca aaaattgaag aagttaatta tcctttatca gcagaaaacg gagaggagaa
2041 gaagtttacg cttgttagca tttttttaag tgttttgaac gtccatgtga accgtatacc
2101 aatatctggt acgataaagg aatgagttta taaaaaaggc aagtttgtat ccgcaatgag
2161 caataggtct agtaatgaaa atgaaaagca ggttattgta attgaatacg aaaaggggaa
2221 agaaattatt gtggagcaaa tagctggatt aattgcacgt cgtatcgttt gtaatttagg
2281 aatatccag aacgtaaaag caggtgaaag gtttgggaatt ataaggtttg gcagtagagt
2341 gaatatctat gttcctgctg atacagaagt cagagtttca gaagggcaaa ctggtatttg
2401 tggatgaaaca attatagcaa acttaataaa ggaaaacggt caagagaagc ttacttttga
2461 cgttatatga ataacgatgg aagtaacagt agattcttac ctattactaa attattccca
2521 aactttataa ctttattggg tttatgttct ggtctcactt cacttaaaat tacatttaat
2581 gaacaatggg aattctcagt aatttttata atcattgcag caataataga tggaatggat
2641 ggcagaatag ctagaattct aaaatcaact agcgattttg gagcccagct tgattctttt
2701 gcagattttc taaactttgg tgcagcgctt gcatttcttt tgtatttttg gaagctaaac
2761 gaaatcaaag tcataggttg gatttttagta atgatatacg taatctgcat atcaataaga
2821 cttgcaagat ttaatgtttc gctacactca gaacaaccat actgggaaaa atttttcttt
2881 tctggtgttc cagctccagt gtgtgcttta ctttctttgt taccaataat tattaccttt
2941 caatctcatg agagtgaata cttacttctc atagagcgat tttttaacac aagaaacgta
3001 gcttgttact ttctggccat ttcatttttt tcgataagtc acattccaac tttctctgca
3061 aaatatattt atattcccaa aagcctatcc tatatatattg tgtcattttt tggagtactt
3121 attgtatttt tcatcagtaa gccctggatg actctaccaa ttttaggtat agtgatataca
3181 ctactatttc caataagcat cgggtttttac atataatttta catataaaac tcgttagcta
3241 acaaaaaata gaaaactgca tgattttgaa gataagtga ctattaaatt catttctgta

```

|      |             |             |             |             |             |             |
|------|-------------|-------------|-------------|-------------|-------------|-------------|
| 3301 | tataaagata  | ttcaacattc  | catttataat  | tatttgggta  | attgcaactg  | gaatcttttg  |
| 3361 | tactgcccag  | ttcaaatcca  | ttacttttag  | gttacttaaa  | tatggaatac  | agacgctatt  |
| 3421 | caatctaaag  | tgtaataaca  | gcaacaatgg  | cataatcact  | catattcaag  | cgtttgcaac  |
| 3481 | agtaattttc  | ggaacagttg  | gtcttggaac  | aatatcagga  | gttgcaatag  | ctatcacaat  |
| 3541 | agggggccca  | agtgcagttt  | tttggtatgg  | aattaccgga  | atacttggtg  | tgtcgataaa  |
| 3601 | gtttgccgag  | gtggtgcttg  | catttactta  | tcgctctgaa  | aatacaactg  | gcggggcttt  |
| 3661 | ttattacatg  | aagtacgggc  | ttgcaaaaat  | tggatttgca  | aaaactggta  | gatttcttgc  |
| 3721 | cttcacttat  | gcgattatgc  | tacttattgc  | aatgattttg  | ggcgggtatac | catttcaagc  |
| 3781 | aaatcaaata  | gcagcactat  | caaataacct  | cctagaatac  | aacgcatacca | ttattataatc |
| 3841 | cctgcttgct  | tttattgtaa  | tattggggagg | aataaagcgc  | attgcttttcg | tttcaacgag  |
| 3901 | cttagcacca  | attatgatag  | tgctatatgt  | gggtatgtgt  | atataatttaa | tttatgtaaa  |
| 3961 | cggaagtaat  | ttgctgaatg  | ctctatccat  | aatattccaa  | gatatcttca  | ataaatcagc  |
| 4021 | tataggaagc  | ggagtattga  | gcggattaat  | agccggagtg  | agaagatcag  | tgtttgctaa  |
| 4081 | cgaagcaggt  | accggaacag  | cagctatagc  | acattcagct  | gtaaaagaag  | aagatccaat  |
| 4141 | taaagttggg  | tgcgttgcaa  | tgattgcacc  | acttatagac  | acaatattaa  | tctcattttt  |
| 4201 | gactgggtatt | gtgataatta  | tcactgggtat | gcatagcact  | gataacgtgg  | gtgatattac  |
| 4261 | actaattagt  | tcgatatttt  | caacagcttt  | gcccttgttc  | agcaagtttag | tttttccgct  |
| 4321 | aatgatgttt  | tcctttgcat  | tttccacaat  | aatagcttat  | tgttactact  | gtgaagttgc  |
| 4381 | tttgctgtat  | ttatttggtg  | gtaaaaaaat  | actgataccg  | ttccaaattc  | ttatagtggg  |
| 4441 | ttcagtgtat  | atcagttgta  | tgtcaaagaa  | tatagaattt  | atatcttatc  | taggtgacag  |
| 4501 | tttgtttatg  | tgccttatga  | ttccaaatgc  | tgttgcaata  | tatctactga  | gaagggaagt  |
| 4561 | cttgagtaca  | atagattcct  | attacaattc  | taaaagggtat | taaacatgac  | ttatagatta  |
| 4621 | ctttgtatgg  | tgttattttg  | tctattgttt  | aatgatgctg  | atgctgcttc  | aggtttttac  |
| 4681 | gaaagttatg  | acgctgtggt  | gaatggaata  | aataacttca  | tgaatgaagt  | gctgtttttc  |
| 4741 | aagatccttt  | acgtgccatt  | tataatcctt  | ctactagttt  | ttgggttatgt | gtttctaaca  |
| 4801 | ttacgttttg  | gatttctcaa  | cataagaatg  | tttaagcatg  | catttgctat  | tttatgtgga  |
| 4861 | aaatatgaca  | cgaatcacca  | tgatgggtcat | attacgcatt  | ttcaggcatt  | tatgactgca  |
| 4921 | ctttcaagca  | cagtaggcct  | tggaactggt  | gctggagtcg  | caattgcagt  | ttcaatggga  |
| 4981 | gggccaggag  | cgggtgccttg | gatgatgatt  | acagggtttt  | ttggtatgtc  | agcaaaaatt  |
| 5041 | gctgaggtaa  | cgttggcggt  | tagacataga  | acagaagatc  | aggaccaatt  | gttttagtgg  |
| 5101 | ccctttcagt  | atataaggaa  | tggtctggag  | gaatttggtg  | ttaaaaaact  | tgggtattgtg |
| 5161 | ctggctgcca  | tgtatgcagt  | attcctttgta | ttatcaggtc  | ttgggtggaag | tgtagcgttt  |
| 5221 | caaaccaacc  | aaatgggtttc | catattatct  | ggctattcaa  | gttgggtaga  | tgggtcactct |
| 5281 | tggttttctt  | cttccataat  | ctctgcgctg  | cttgctctag  | tgattatttg  | tgggaattaaa |
| 5341 | aggatagcta  | gagtatcttc  | tgcactagtg  | cctattatgt  | cacttatata  | tatctttagt  |
| 5401 | tgtattatta  | ttattgcatt  | taatattcat  | aaccttggtt  | atacgttgaa  | aatattattt  |
| 5461 | tccactatga  | tagatttcaa  | tgctgtttgg  | ggagggatgg  | taggagcatt  | tggtgctgga  |
| 5521 | attcaaagg   | caatctttgc  | cagcgaagcg  | ggtgttggtt  | ctgcttcaat  | tactcatgca  |
| 5581 | acaactaaag  | atgaagaacc  | agtaagaaca  | gggcttggtg  | caatgataga  | gccgtgtttt  |
| 5641 | gatacaatgc  | tcatttgctg  | tttaactgga  | ataacgatag  | taataacagg  | tgcataccaa  |
| 5701 | acagggtgtt  | gtgaggggaat | attaattact  | caaaaggcat  | ttgagacagt  | ttctccatgg  |
| 5761 | tttcctatcc  | ttctaacagt  | agctgctcct  | ttgtttgcat  | tttcttcggt  | aatttcattt  |
| 5821 | gtatattggt  | gtgaaatggg  | gtggctatat  | ttattcggtg  | caaaaagtat  | agtgatatac  |
| 5881 | cgcatagcgg  | taataattgt  | ggcggttttt  | tctggccttt  | ctaaagatat  | aatggctatt  |
| 5941 | gccaatatcg  | gtggaacttt  | gttctcttgt  | ttagctttga  | tcaacatgac  | agcgcttata  |
| 6001 | ctgttttagca | atcagattaa  | cgatgaagtt  | cagtgcctacc | taaaaagggt  | gaggaataat  |
| 6061 | aaaattaatt  | aaattttggc  | atatgaaggt  | acaacaacag  | atgtcatttc  | agtaccatct  |
| 6121 | tcttgttacc  | tcagaactct  | ctcttgcat   | cccagtgcgt  | gacactggga  | tccagtctat  |
| 6181 | ttcatcatgg  | acattatttt  | taagatatgc  | tcctagaatc  | cgttgtcaac  | tgcataattt  |
| 6241 | gcaaatactt  | ttatatctgg  | attccagtgt  | caagcactgg  | aatgacaccc  | ttctggtact  |
| 6301 | cagatgatac  | gaaaagaaac  | gctggaacga  | cgctcgttcaa | ggcaacaaat  | tgccttcaaa  |
| 6361 | ttacaacaac  | tgtggatatg  | atggagaggt  | acgtaatcct  | tatactatcc  | tacatactcg  |
| 6421 | gttcaatacc  | gttttagctta | atcattacaa  | gaataaaaagg | gataaaactta | agagaaatag  |
| 6481 | gttcaggtaa  | tattggtgct  | acaaacgttg  | caagaacagg  | aaataaattt  | cttgctgctt  |
| 6541 | tggcattact  | tctggattcc  | tttaagggat  | ttattgccgt  | ttatatagca  | caacaatttt  |
| 6601 | ttgatgataa  | tctttgtata  | tacatatctg  | caatttttagc | agttttagga  | cacatgtttc  |
| 6661 | ctgtatggct  | aaaattcagt  | ggaggaaagg  | gcgttgcaac  | cactctaggg  | atactgatag  |
| 6721 | catttaacat  | tgatattact  | ttagtattcg  | taataatttg  | gataatagtc  | tttcttgccct |
| 6781 | ttagatactc  | ttcccttgct  | tcactcagtg  | ctacttcaac  | ggctgtagca  | tggctcctttt |
| 6841 | tttttcagag  | gaatttggtc  | ttaacattac  | taattatagg  | agcactagtt  | ttcttaaagc  |

|       |             |             |             |             |             |             |
|-------|-------------|-------------|-------------|-------------|-------------|-------------|
| 6901  | accacagaaa  | tattgtgaat  | cttctgcaag  | gtaaggaaaa  | taaatTTTTT  | taagcatgct  |
| 6961  | gactctgctg  | ctatatTact  | aacagatact  | tcatgcgaga  | aacgacttga  | gactacttcc  |
| 7021  | tctacttctt  | ttatcatTtc  | ttccatgctt  | tttccacttt  | tcttacatgc  | atcatcaagt  |
| 7081  | gctaattTTT  | gcttacgtat  | atcattctct  | tctagcatct  | tattcatTtc  | TTTTTctgtt  |
| 7141  | atctctaatt  | TTTTtagtaa  | gatgttctcc  | attatctctc  | tttcatcacc  | tttatactgg  |
| 7201  | ctacttagtc  | tgctatacgc  | aatgcaacac  | ttcttttctc  | gtggcaaggc  | tgacagattt  |
| 7261  | tgcaatgtag  | catctacttg  | aacttctata  | gggttaactt  | tcctagcctt  | ttcaacagct  |
| 7321  | tctgacctaa  | atttctcgac  | ttctcctatt  | attatTTTgc  | tagctattct  | tttagcttca  |
| 7381  | tccacagatg  | aatccttgag  | agaaaaatct  | gtcttgagta  | aattttgggt  | taaaagctct  |
| 7441  | agaaaaactt  | tttcttttat  | atcagcacaa  | catcttgtgt  | ttgtttcttg  | tgcaatataa  |
| 7501  | aaagataagc  | gctcatccaa  | gaattctact  | aactttatag  | aactaatatc  | tttcattaac  |
| 7561  | atcagcacaa  | tttgttcact  | atattgagaa  | gtgaaactca  | ataatTTTct  | cattaaagga  |
| 7621  | atacttactt  | ctgaaataaa  | attatcaact  | atcttctgac  | tttcatcggt  | agggtcattc  |
| 7681  | tgagctttgt  | accaagcctt  | aagaatttct  | ttactgtttt  | ttttgttttt  | taacctgtct  |
| 7741  | aacatgaact  | tacgtgcttc  | attttttgcc  | tctgaaattg  | atatttgctg  | cggagcagta  |
| 7801  | aatctaattt  | ctggatcagg  | atgaataccc  | tctagtgtgc  | ttaacattct  | gtagacaata  |
| 7861  | ccggtaaaac  | aggtgttagg  | gattcgctct  | tttctagaga  | aagtttggtc  | atcaagcaaa  |
| 7921  | tttgtaatta  | acgcgtcttt  | tttatttttt  | acagcttctc  | tgtctccatc  | attgcaggct  |
| 7981  | ttcagaacta  | aaagtaaaat  | ctgtccacct  | gtaaagccgg  | agctatgctt  | ttgatcatct  |
| 8041  | ttgcaaaagt  | catttaaaaa  | tgtaattact  | cttcccttat  | cctcatcact  | aaattgacga  |
| 8101  | taattaagtt  | catttaaatc  | atttatatat  | tcaataaaat  | gcttaaattc  | tctatcatta  |
| 8161  | ataacgtctt  | cggatacttt  | ttcaccatac  | ttatctttta  | atttatcaat  | atttttaatg  |
| 8221  | atatcatcat  | ttaattgatg  | gggcagtaaa  | tgttcaagct  | taacatcaaa  | actattaacc  |
| 8281  | ataccacgta  | aattctcttt  | tataccctcc  | aaaaagaaat  | ttatagaagc  | tttaagcagc  |
| 8341  | gtaaattgggt | taaaatcttt  | tggtctcagt  | tcactctgca  | ataaaaacca  | tagcattgta  |
| 8401  | agtggtatag  | ttcccagtaa  | cgaaataagc  | aaaaaagtgg  | tagtgaaagt  | tagatatggt  |
| 8461  | ataaaaagcag | aaaacaagag  | gaaggctgct  | accttgattg  | tattgttctt  | aaaaaatatt  |
| 8521  | tcccaatatt  | cccttttgct  | catcttttgc  | tgttttgccg  | tttttatttc  | tttgtagata  |
| 8581  | taaagagttt  | taatttcaga  | cctgaagaat  | atagtaccaa  | gagaaaaaag  | aacattaacg  |
| 8641  | ggattagtga  | taatgcttaa  | agaaacaaaa  | gttgcaaaat  | aactaacaaa  | cttttagcctg |
| 8701  | ctagattccct | ttgaaggaaa  | ttgtatttga  | gaaataccta  | tcatagctta  | ccttcaacat  |
| 8761  | cattacactt  | tagtaatagc  | ataataattt  | aaaacgtcaa  | tgtttaagta  | tcttattatc  |
| 8821  | cgcacattca  | tcatactcga  | tttcaactgt  | agagtgtgct  | atttcgaact  | tatctagcaa  |
| 8881  | tatttttttt  | atttcatata  | aaacattgggt | gtgctgcaca  | ttttgcttta  | tttttagcatg |
| 8941  | catggtaatt  | ataaaataat  | tatcagacag  | cgaccatgta  | tgtatgtgggt | gcacatctat  |
| 9001  | cacttcagggt | aattctgatg  | tgatcttact  | ttttatctct  | tcagcagata  | taccctcagg  |
| 9061  | tgtaccttca  | aggagtatat  | ggcaagaatt  | ctttagaatt  | ttgtagccac  | tatttagaat  |
| 9121  | tatcacacta  | acaaatactg  | ataagattgg  | atctactatt  | tgccatccag  | taagcatgat  |
| 9181  | aattatggat  | gcaagtatag  | cagctacaga  | acctaagata  | tctcctataa  | cgtgtagtac  |
| 9241  | agcacttttt  | atgttttatat | tgctctcgca  | tttactatgt  | aatataaaaa  | agactatgat  |
| 9301  | attagagatc  | aggccaagtg  | tagcaattat  | taacattact  | ttccactcaa  | cattgactgg  |
| 9361  | aaaaataaac  | cttttttattg | actcaattat  | aatgattact  | gcaatgagga  | atagagttaa  |
| 9421  | accattaaca  | aatgctgcaa  | ttatctgcaa  | ccgatgatac  | ccgtatgatac | tctgcaaatc  |
| 9481  | ggattttctta | gctgaaaacc  | tatgtgctaa  | ccagcttaaa  | accaaggcaa  | agaggctcagt |
| 9541  | gagcatatgc  | cctgcatctg  | ataatagagc  | aagcgaatgt  | gaaattattc  | cacctactat  |
| 9601  | ttccataaac  | attgttatcg  | caactattat  | tatggaatag  | attaagcgct  | tggactgcgc  |
| 9661  | tgctgagtgt  | ttaccgttat  | gcaactgctgt | catataaaat  | cttttcatga  | acaaaaacgt  |
| 9721  | gggtaacact  | gggttcgaac  | cagcgaccgc  | ttgcacgtca  | agcaagtgtc  | ctaccaactg  |
| 9781  | agctaattac  | ccatcggtgt  | tttagtatag  | tgctttgggtg | gaatgaaagt  | caataaacca  |
| 9841  | ctttgctttt  | gtccttgtcc  | aatgtgattc  | cgaaatatag  | ctgtatagaa  | tttcagccat  |
| 9901  | attctaaatt  | ttacatatata | agttaactat  | ctatacttta  | tttattaaga  | tataaattat  |
| 9961  | attaatacag  | gaattttacgt | tttttttagg  | gaaattactt  | tatgcttgat  | atttgaagag  |
| 10021 | ttaataaatt  | ataggttaga  | atcatggcaa  | tcaatcaaca  | agtaaataaa  | aatataacta  |
| 10081 | aagaagaata  | cttcaacaat  | aacggcaaaag | ggtttaattc  | gccacatggt  | atagaagttg  |
| 10141 | aagatttaaa  | tattaaagta  | gaggtttatt  | ctcacaattt  | aagagcaagt  | aaagttgcta  |
| 10201 | acattgaaag  | tgagataaga  | gaaacagcta  | ctagtttttaa | agatacattc  | aagttagaac  |
| 10261 | gcggcagttc  | agaacaaaca  | tttaaaattt  | acatgtttga  | tgacaaggat  | gattacactc  |
| 10321 | accttggtgg  | aagcgagcgt  | ttcggttctt  | accttgagga  | cgaagggtgg  | aaatgttact  |
| 10381 | acaaagggaa  | agctgatgtt  | tttgctgaaa  | tgtacgtcta  | ccagcaagggt | ggcgttcata  |
| 10441 | atcttcagca  | tgaatttgca  | catggtttaa  | cttacttggc  | tacaggaggc  | aaatctttac  |

|       |             |             |             |             |             |             |
|-------|-------------|-------------|-------------|-------------|-------------|-------------|
| 10501 | ctacagtatt  | aatggaagga  | attgcagatt  | actttgagca  | tcattcagat  | cataaattca  |
| 10561 | atttctcaagg | atcaagtatt  | gacaagaccg  | aagctgcaaa  | tttggattta  | gataaaattt  |
| 10621 | taagttttaga | atactcaaag  | gacagcgaag  | caaatagcct  | agttttataaa | acaggtcatg  |
| 10681 | cgttgataat  | gtacttacag  | gaaaaagatc  | ctagttttatt | aagagactac  | ctagatgctt  |
| 10741 | tacgtcaagg  | taactcagat  | gagtcaaaaa  | gtttcttgaa  | agacataaaa  | ggacacgata  |
| 10801 | ctgacttcaa  | aagttggctt  | gctgagaatg  | atacagaaac  | tgcaatggaa  | catctcaacg  |
| 10861 | ctttgcaagt  | tacaaaagga  | gatttcatag  | caactggtca  | agaaatagtg  | ggtggagaaa  |
| 10921 | ttaaaaacgt  | atcctactat  | aaagcaaata  | tagaaaaaat  | ggatggagaa  | aacgttggaa  |
| 10981 | gtttttctcc  | tgtagaacac  | gttgcatttt  | atgatgttgc  | tcgtgctata  | aataggggcaa |
| 11041 | caaatgatac  | acttgatata  | tcaaaggaat  | atcatttcct  | caaggtagta  | aaaacttccg  |
| 11101 | atggacaaga  | taaactaact  | tactctgacc  | aacaaggtaa  | tgagtaccga  | aacagtctag  |
| 11161 | agtataaaaa  | tcaggctttt  | agaatgctat  | caaagtatga  | tgaaaattta  | aagaaagctt  |
| 11221 | atgatgatgc  | attaaaaaat  | ctggatgagc  | agaggcaaat  | ggaatatccc  | aagataaata  |
| 11281 | aagaatatag  | cgaagggaag  | atttcttacg  | aagagtattc  | agacaaatat  | tattcaattc  |
| 11341 | cctccaaata  | tgaggaatta  | aaaagtacct  | tacttgatga  | aaccataaac  | actggcttag  |
| 11401 | aacaagtaaa  | agcgactaag  | aacatcgatg  | tagaaaagat  | gttagaagag  | atgatcaata  |
| 11461 | tcgattcaaa  | cttgataaga  | ggtacaaatc  | atattgatct  | acaagaaggt  | aagatttttt  |
| 11521 | ctatgcaagc  | tcatggtcaa  | ggagatatgg  | gtgcaactgc  | tatatatgac  | ggaaatacaa  |
| 11581 | agcttgagaga | attattgagc  | gaatcaggat  | tttttaagca  | agttgaaggc  | caactaaag   |
| 11641 | aaactttcgt  | ttttgaggat  | atattacaca  | acttaaatgt  | ttcatacgaa  | ggcggtgctt  |
| 11701 | acatggcagt  | tacaaaagaa  | aatggtcatt  | ataaagcttc  | cctaatagat  | ggcagaacag  |
| 11761 | ttgaacgcga  | tgaatacttt  | gatgaagcgc  | atttcatga   | aatgaattg   | ttgcatccta  |
| 11821 | gcactggaca  | catccaaaaa  | gatttagatt  | ctctgcttct  | tagaggtacc  | aaaattttga  |
| 11881 | atcatcagga  | ttcagaacat  | gcacaatatt  | ctgatgagca  | aaaggcaaat  | ggagtaatcg  |
| 11941 | tggaaaaagg  | aaaattactg  | gataataagg  | gaacagatag  | gacagacgat  | gatgtatatg  |
| 12001 | aagctgtcgt  | aaagcaagga  | gacgagcgct  | tacatgaatt  | taaaaaatatg | ggcttttata  |
| 12061 | ttaccgagaa  | aggtgatcta  | tttattcatg  | accatggagc  | aatgtaagg   | tttcaactac  |
| 12121 | cacaaaagtat | tactcatcta  | aaatttagtgg | aaaaagacgg  | agcatataag  | cttgttccgg  |
| 12181 | tgacaaaaga  | tggtaatgaa  | catccaatag  | gtatgccaaa  | tatatcagat  | gaatatagat  |
| 12241 | acatagatcc  | aatatattgca | catgaatatg  | aaaagagaga  | ttattcccat  | aaacatgtaa  |
| 12301 | atgtgggcct  | tataaactta  | gagaaatatg  | gctctggcaa  | actttttgct  | ataaagtacg  |
| 12361 | acccaaatga  | ttaccacata  | caaagaaact  | ctagcgggtga | aatagttaga  | ataaaagatc  |
| 12421 | aaacatatatt | cactaaagta  | aaattgtttg  | atggcgacga  | agaaattgga  | atgttatcta  |
| 12481 | ataactttcca | taacttcaaa  | ggtaaaaatat | tcttttctgc  | tgactacaac  | tacagttata  |
| 12541 | acgattttcct | agcatctgtt  | tctcctcaag  | ttgaaattga  | ggatatggga  | aatggaagta  |
| 12601 | aaaaaataac  | tttcgatcaa  | ggtagtgggtg | atatcgggtga | tactaataga  | ggctacacgg  |
| 12661 | actatcagag  | aatatatata  | aaaaccgaaa  | gtccaaaagg  | gcaagtaagt  | gaaactaaga  |
| 12721 | cagaagttca  | tagtactact  | aatgttggtg  | cacaagctgc  | tgaagagaaa  | actgcatcaa  |
| 12781 | acgacaatag  | tgaaatgcag  | tctgaccagc  | cacaaattcc  | aacaagggca  | aaaaggtcag  |
| 12841 | cttcagtggg  | ggagaaaagag | caagaacagg  | tagtattaaa  | agacacaatt  | ctcaaaatag  |
| 12901 | aaaagagcta  | cgagcaggac  | tcagaaggga  | agcataaggc  | aatgtaacg   | atagattata  |
| 12961 | atgatgtaaa  | agccttatat  | gatagagcgg  | aaggagcaga  | aaagcaatct  | gtgttagatt  |
| 13021 | tttggacaa   | actgcacaca  | tcagaatata  | aggttgggtg  | tttgccggaa  | gacaaatact  |
| 13081 | attttgaaaa  | aggcaaattc  | gtaatccacg  | atagtgtata  | gaaaaagctt  | atagtgttac  |
| 13141 | ctgaagataa  | ggtgtccatc  | aagataatga  | aggatgggtga | tagttatagt  | ttagctatat  |
| 13201 | caagtggtaa  | tggcaaagta  | ataagcagca  | ttagtaaaat  | agataatcca  | aattacgaat  |
| 13261 | tgctgtcaga  | ttcaagtcac  | ttcaattcag  | aggagcaaga  | taatatgtga  | ttatcagatc  |
| 13321 | aacatcacga  | atataatctt  | tatctagaga  | atggttttgt  | gaaaatgttc  | gattgcgcaa  |
| 13381 | gcgatcacat  | ttatcacgac  | cacaactcgg  | cctatatcta  | atacatataa  | ggagggcagt  |
| 13441 | gccctcttct  | tgtcattcca  | gtgtcaagca  | ctgccgtctt  | ggatggaaac  | cagcgtcacg  |
| 13501 | ccctggaatg  | acaggggtttg | tcacccgagt  | agcccccttcg | gtgtcatccc  | agtgcccaga  |
| 13561 | cactgggatg  | gctttgttgc  | atcgctactt  | atgaaaggct  | aactatagtt  | aggattataa  |
| 13621 | gcaacctatt  | gaaaaatctt  | tttttttgca  | atcaaatctga | tcaaatttaa  | gaatagtaat  |
| 13681 | ttgttattta  | tattaataaaa | tttaattcta  | ttgaaaaatag | ctaaagcatt  | gaaattcttg  |
| 13741 | aatttttagcc | agatttagtga | gtggtagtga  | aatttctttt  | actcaaattt  | aggtattcac  |
| 13801 | tgaccgttct  | tgttataaat  | accagaataa  | taagctactg  | atattcccta  | tcttttttat  |
| 13861 | ctttaatcca  | tcatagctag  | cgatgcaaca  | aagcccaactg | ggatccagaa  | aacttaactt  |
| 13921 | taaataagtg  | gctgcataat  | aaaggctgga  | ttccagactg  | gaatgacatc  | atctgctaca  |
| 13981 | cacttgaatg  | acaagagaag  | aattctgaaa  | caacaagttt  | caaggaaatc  | ttatgtaaaa  |
| 14041 | tctaacatta  | acgaaattat  | actatttttca | tgcattgctat | ggtttttata  | atcaatggag  |

|       |             |             |             |             |             |             |
|-------|-------------|-------------|-------------|-------------|-------------|-------------|
| 14101 | agtgtgatat  | gacgttagat  | gaaccttttag | aagaatcact  | cataaacaat  | aatgattttg  |
| 14161 | taaatgctct  | attagcaaag  | ctcaaagcag  | gggctgatga  | taatgggtgtt | tataactaaaa |
| 14221 | aagggtgtgga | tgatgagttg  | aaaaagaaaag | ctgacacagc  | cgctctaact  | aacaaagctg  |
| 14281 | acaagaatta  | cgtcgatact  | gagctaagaa  | agaaagctaa  | ttcagctaata | ttagcagcta  |
| 14341 | aagctaatac  | tgcagatggt  | tacactaaaa  | aaaatgtaga  | tgatgagttg  | gcaaaaaaag  |
| 14401 | ctgacacagc  | cgctctagct  | aacaaagctg  | acaagaatta  | cgtcgatact  | gagctaggaa  |
| 14461 | agaaagctaa  | ttcagctgat  | ttagcagcta  | aagctaacac  | tgcagacggt  | tacactaaaa  |
| 14521 | aaaatgtaga  | tgatgagttg  | gcaaaaaaag  | ctgacacagc  | cgctctagct  | aacaaagctg  |
| 14581 | acaagaatta  | cgtcgatact  | gagctaggaa  | agaaagctgg  | tgcagctgat  | ctagccaaca  |
| 14641 | aagctaatac  | tgcagatggt  | tacactaaaa  | aaaatgtaga  | tgatgagttg  | gcaaaaaaag  |
| 14701 | ctgacacagc  | cgctctagct  | gacaaaactg  | acaagaatta  | cgtcgatact  | gagctaggaa  |
| 14761 | agaaagctaa  | ttcagctgat  | ttagcagcta  | aagctaacac  | tgcagacggt  | tacactaaaa  |
| 14821 | aaaatgtaga  | tgatgagttg  | gcaaaaaaag  | ctgacacagc  | cgctctagct  | aacaaagctg  |
| 14881 | acaagaatta  | cgtcgatact  | gagctaggaa  | agaaagctgg  | tgcagctgat  | ctagccaaca  |
| 14941 | aagctaatac  | tgcagatggt  | tacactaaaa  | aaaatgtaga  | tgatgagttg  | gcaaaaaaag  |
| 15001 | ctgacacagc  | cgctctagct  | gacaaaactg  | acaagaatta  | cgtcgatact  | gagctaggaa  |
| 15061 | agaaagctaa  | ttcagctgat  | ttagcagcta  | aagctaacac  | tgcagacggt  | tacactaaaa  |
| 15121 | aaaatgtaga  | tgatgagttg  | gcaaaaaaag  | ctgacacagc  | cgctctagct  | aacaaagctg  |
| 15181 | acaagaatta  | cgtcgatact  | gagctaggaa  | agaaagctaa  | tactgcagat  | gtttacacta  |
| 15241 | aaactgctgc  | tgatactgct  | tttgctaaaa  | tcaatgcttc  | caaccttata  | gaggcagtaa  |
| 15301 | acaaaaaagc  | tttcgcgaaa  | gctatacttc  | ctgcaaaaaga | cggcgacaaa  | tcaatttttag |
| 15361 | tggataaatt  | aggaggattt  | cttgatgcta  | ctgacacagc  | gtatggtgac  | aaaaatgatc  |
| 15421 | aaacagcaaa  | ggtgttctta  | ggaggtaaag  | ggctaaaagg  | ggagacagga  | gccactggtc  |
| 15481 | ctaaaggagc  | agatggtaaa  | gatggagctc  | aaggcccaca  | aggagagaca  | ggggagacag  |
| 15541 | gagcagatgg  | taaaagtcca  | acagctgctg  | aaatagctgc  | tgagaaagcc  | ttacaagagc  |
| 15601 | atgtaacaaa  | gataagcata  | caaagtccag  | aattttaaag  | agctgtgcaa  | gaggaaatgt  |
| 15661 | cacaaccgta  | ttttgagcct  | ccaacaagtg  | atgatgctgc  | acttaattgg  | acttggtaat  |
| 15721 | acagcttaga  | tccaagtagt  | cacgctactt  | ggatgacgct  | atatggctct  | ctgatgacgg  |
| 15781 | aaaaaggact  | cggataacac  | cctacaatgt  | cattccagcg  | cgtgacgctg  | gaatccagcc  |
| 15841 | ttttcataat  | cattaaaatg  | ttgtatttta  | acataaaaacg | gctactttta  | tgcttaccaa  |
| 15901 | cttaataaaaa | ttcctggatc  | ccagtgtctg  | ggcactggga  | tgacacccta  | ctagcagaag  |
| 15961 | ttactctcaa  | atgtttgttc  | atgttagcta  | caaacattaa  | gaaattttacc | aaacgaaaaa  |
| 16021 | aaaggcaaaa  | gaagccctag  | ggtcattgtc  | tatttttcagt | attggcggtt  | tttaagtctt  |
| 16081 | aaacactgcg  | caatttagct  | gctttttaatt | gcaactcatc  | ttagtcaaat  | gtttaagaaa  |
| 16141 | tttactaagc  | agaaaaaaaag | gcaaaaagaaa | tcccgtatta  | gctagttgtc  | actctctaata |
| 16201 | cctgcaaatt  | ggcgtgctat  | gactgtctta  | aacgctttat  | aagcgcggtt  | cagcttatata |
| 16261 | aggtaaaaac  | ccagaaatgt  | tgtgaagacg  | taggggtgctc | atagtgcata  | aaattgaaaa  |
| 16321 | ataagacgcc  | aattacgtaa  | tactgttgct  | gtttaatctg  | cacagattgc  | aaagataaat  |
| 16381 | gaataccttc  | agtttcatga  | taagagggct  | ggcgaagggt  | gtcaagtaag  | ttttttcggt  |
| 16441 | tctaccagct  | acttggtatga | caccacataa  | attaataaat  | aggaaaatta  | ctacaaatcc  |
| 16501 | tttcaacttt  | agcttttact  | gcttttttga  | cacttgagct  | atctccgctg  | attaatcctt  |
| 16561 | gaattacttc  | atttattaga  | ccagctatct  | ctttaaaatt  | ttctgcctca  | agtccgctg   |
| 16621 | ttgtctcage  | agcgggtgcca | aaacggagcc  | ctgaagtgat  | ggtcggcttt  | gctgtatcaa  |
| 16681 | atggtacaga  | gttttttatta | caggtaatac  | cggctctctc  | aaggctatct  | acaacgtctt  |
| 16741 | ttccagttaa  | tttctgcgat  | cttaagtcaa  | ctagcactat  | atgagagtca  | gtgccaccgg  |
| 16801 | ttataatgtc  | aagtccatgc  | ttttgcaatt  | cttgagccag  | cacttttcga  | ttttccacga  |
| 16861 | ctttcttgct  | ataagtctta  | aactctggtg  | ctaattgcttc | tttaaatgca  | acagcttttg  |
| 16921 | cagctatcac  | atgcataagt  | ggcccgcct   | gcaatcctgg  | aaaaactgca  | gattgaattt  |
| 16981 | ttttgtgtaa  | tgcttcatca  | ttggtcatca  | ctattccacc  | acgaggacca  | cgaaaagt    |
| 17041 | tgtgagttgt  | ggaagtcata  | acatgtgcat  | attcagcagg  | ggatggatat  | tcgcccgtg   |
| 17101 | caataagccc  | tgcatagtga  | gcaatgtctg  | caagcaaata  | agcaccaact  | ttatctgcaa  |
| 17161 | tttcgcgaaa  | gcggttgaa   | tccatttttc  | tcggataagc  | agaagcacca  | gctatgatca  |
| 17221 | atctcggttt  | atgctccagc  | gccagctttt  | ctatctcatc  | catatccagc  | aagtaagtgt  |
| 17281 | ctttattcac  | tgtatattga  | actgacttaa  | accatttacc  | agaaaggctt  | ggtgccgcac  |
| 17341 | catgagttag  | atgcccaccg  | caattcagtg  | acaatccaag  | tatcgatatca | cctggagcaa  |
| 17401 | gtagtgaagc  | aaacactgct  | tgattcgctt  | gagaaccaga  | gtgaggttga  | acgtttgcaa  |
| 17461 | attttacacc  | aaacaactta  | caaagtctct  | ctatagccag  | actttcaatt  | ttgtccacat  |
| 17521 | gtcacaacc   | acagtaatat  | cttttacctg  | gataaaccttc | tgcgatattta | ttagtacagaa |
| 17581 | aagagccttg  | tgccctccatt | accgcttttg  | ttgcaaaaatt | ttctgatgca  | attaattgca  |
| 17641 | attgtgattt  | ttggcgttgt  | aattcttttt  | ctatagactg  | ataaacctcg  | ttatcaaaag  |

```

17701 acttttaaact atttttagag ccacagattt tttttaaaac actcatcata gatcaaacct
17761 cgctttaatt ttaagatgca caagcaattt taagactgct tatcctgctt ttttaaccat
17821 aagagcccaa aaacagctat cagcaaakat acaggaataa tagatgttgc ttttatcagc
17881 aattcagcac tatacacagg atttccttgt atcactgtcc tatcccaaca caaatctatt
17941 atttttgcgga tcccagtgtg aaaaaaatag ccaaaaacca tgactatcat atttgacaca
18001 gctgtagtta atcctattaa gttattattt acataactta atgctttgta cagtgttact
18061 atttgatatc cagaagcgaa acctataaca agaagtgcag gcaatacaat atacaatccg
18121 ccagcctgtg taaaaagtaa aaggaaacta gcaatcattg caaaggaaca gacaataata
18181 acttcataat gtctattttg atatttttct aatatgtgag caaaagagag caatccagct
18241 gcaaatccta catatataac agaagaaatt gaagacgcta gatcaccggc catttgatat
18301 acctcacata aaaaagcttt tgtccaagca tcagcaaaaac cttctagtgg acctaccatt
18361 aagccaccaa aaaaactaat tagaatgata tatttattga aaagcacagt ttttagatcc
18421 ttcattgctaa ttttttcttt tcgaaagtgt taagcattgt aaggaataac taaaaataaa
18481 gataaagcga gtaagaaacc aaaccctgaa agaataataa ttacataatt ccaaccaaac
18541 tcatcaagca aaagttctat tggtagacca ccataatattg cccctaataag ccctataata
18601 acagatatgc ttgccatttt tgctgatttt tctcgcgaaa aatacatact ggcaacttta
18661 aatactccta ttactgacgc agacgagcca atcccaacaa ttattctacc taatactgaa
18721 taataccact catcaaagca cacaagaggt aatgttccaa tagacaccaa gacagcacia
18781 ataggtaaaa caatttttgg accgaatcta tcaaaacaaa gaccaacagg gatatgaact
18841 agtgtaaate ccacatagta gagaccatta aattgcccta aatctgcaat gcttatatta
18901 aattttgtta ttaatacagg cgcaattatg tttggcatga cacgtaacac atactggtat
18961 gcatagaaaa gagatactat caaccataca aaaaaattac ttttcgacat acctaccacc
19021 taataaaaacc caattacaat taaaacaaaa atatcaaagt aaaataaagt attatatattc
19081 ataataacaa gagccttaaa ttagtacatc taacgatttt atcatagcag ctttcgataa
19141 attatctact tattacaatc aacttctcta aaatctttat tttttaacca taagagccca
19201 aaaacagcca ccagcaaaca tacaggaata actgatgttg cttttatcag caattcagca
19261 ccatacacag gatttccttg tattattggt ctatcccaac acaaacttac tatttttgcg
19321 atcccagtgt gaaaaaaata gccaaaaacc atgactatca tatttgacac agctgtag

```

//

```

LOCUS      JAQZAU010000084                861 bp    dna        linear    ENV 17-MAR-2023
DEFINITION MAG: Wolbachia pipientis isolate wEsol contig_44519, whole genome
            shotgun sequence.
ACCESSION  JAQZAU010000084 JAQZAU010000000
VERSION    JAQZAU010000084.1
DBLINK     BioProject: PRJNA929258
            BioSample: SAMN33142973
KEYWORDS   WGS; ENV; Metagenome Assembled Genome; MAG.
SOURCE     Wolbachia pipientis (insect metagenome)
ORGANISM   Wolbachia pipientis
            Bacteria; Pseudomonadota; Alphaproteobacteria; Rickettsiales;
            Anaplasmataceae; Wolbachieae; Wolbachia.
REFERENCE  1 (bases 1 to 861)
AUTHORS    Fiutek,N., Couger,B.M., Roy,S., de la Torre,J.R. and Connor,E.F.
TITLE      Genomic assessment of the contribution of the Wolbachia
            endosymbiont of Eurosta solidaginis to gall-induction
JOURNAL     International Journal Molecular Sciences
REFERENCE  2 (bases 1 to 861)
AUTHORS    Fiutek,N., Couger,B.M., Roy,S., de la Torre,J.R. and Connor,E.F.
TITLE      Direct Submission
JOURNAL     Submitted (10-FEB-2023) Biology, San Francisco State University,
            1600 Holloway Ave, San Francisco, CA 94132, USA
COMMENT     ##Genome-Assembly-Data-START##
            Assembly Date           :: JUN-2019
            Assembly Method          :: FLYE v. 06-2019
            Genome Representation     :: Full
            Expected Final Version    :: Yes
            Genome Coverage           :: 100.0x
            Sequencing Technology     :: Illumina HiSeq; PacBio Sequel
            ##Genome-Assembly-Data-END##
FEATURES   Location/Qualifiers

```

```

source      1..861
             /organism="Wolbachia pipientis"
             /mol_type="genomic DNA"
             /submitter_seqid="contig_44519"
             /isolate="wEsol"
             /isolation_source="galls on Solidago altissima"
             /host="Eurosta solidaginis MN-2018-EFC"
             /db_xref="taxon:955"
             /environmental_sample
             /country="USA: Cowling Arboretum, Carleton College,
             Northfield, MN"
             /lat_lon="44.48 N 93.13 W"
             /altitude="280 m"
             /collection_date="2018-11"
             /metagenome_source="insect metagenome"
             /note="metagenomic"
gene         complement(557..673)
             /locus_tag="wEsol_00975"
CDS          complement(557..673)
             /locus_tag="wEsol_00975"
             /codon_start=1
             /transl_table=11
             /product="hypothetical protein"
             /translation="MSLEPQSYLSNASVHSHSEVSTCLSEIGVTKLGGNLNR"
             /besthit="qcoverage 100 , hcoverage 0.765357502517623 ,
             similarity 100 , identity 97.4 , evalue 3.84e-14 ,
             alnlength 38 , Eukaryota , Arthropoda , KAF5269421.1
             hypothetical protein FQR65_LT14977 [Abscondita
             terminalis]"
gene         complement(722..>861)
             /locus_tag="wEsol_00976"
CDS          complement(722..>861)
             /locus_tag="wEsol_00976"
             /codon_start=1
             /transl_table=11
             /product="hypothetical protein"
             /translation="NEISGILKSYEEKACPGEEAGKLSPKKFEKFIAQFNKDLLNQSI
             E"
             /besthit="qcoverage 100 , hcoverage 14.1955835962145 ,
             similarity 95.6 , identity 95.6 , evalue 2.25e-18 ,
             alnlength 45 , Bacteria , Proteobacteria , MBV2146358.1
             latrotoxin-related protein [Wolbachia endosymbiont of
             Pissodes strobi]"

```

#### ORIGIN

```

1  cttctagtat ttgctaagag gacggagtta ttttataaca taggtcctgg tttttgatgg
61  ggttttttcag tttggtcggt aaaacaaact tctggtaaca ctacggactc aatcagtccta
121 tgtgaggtcc tcatggaccg gccagttcaa cctacctacc tcattctgaa attttgcaac
181 tcaaaaaaaaa acataatatt cctacttatt cactttaaca tttataaaaa cctttttctaa
241 gttagacatg tcccctaatt aagaatatag tgaactgtct aaaacagcta tgaagattgc
301 acacagaatt atataaatta ctatcataac gttacccaaa cttctatatc aaaactacgt
361 gctgtatggt taatatggat agtatattaa ccatattatt cccaactcta gtcttgtatt
421 cctacttcat tcatcttagt attagaacca tcaaaacttg tactagtata cctaattatt
481 ttgtggctaa tattgccacc ttcactttta ttttccacta cttggcatat tatagtccta
541 cctcttatat tataacctac ctattgagat tacctccaag cttgggttact cctatctcag
601 aaagacaagt tgatacttct gagtggctgt gaactgaagc attacttaaa taactttgag
661 gctctaaact catttgcttt gcaccataaa cttctaattg accatctctg ttgtgtaata
721 tctactctat tgattgattt agcagatcct tattaattg agctataaac ttttcaaatt
781 tcttcggact taatttacca gcttcttcac caggacatgc tttctcttca tacgatttta
841 aaatccccga aatctcatta a

```

//

LOCUS JAQZAU010000085 711 bp dna linear ENV 17-MAR-2023  
 DEFINITION MAG: Wolbachia pipientis isolate wEsol contig\_44903, whole genome  
 shotgun sequence.  
 ACCESSION JAQZAU010000085 JAQZAU010000000  
 VERSION JAQZAU010000085.1  
 DBLINK BioProject: PRJNA929258  
 BioSample: SAMN33142973  
 KEYWORDS WGS; ENV; Metagenome Assembled Genome; MAG.  
 SOURCE Wolbachia pipientis (insect metagenome)  
 ORGANISM Wolbachia pipientis  
 Bacteria; Pseudomonadota; Alphaproteobacteria; Rickettsiales;  
 Anaplasmataceae; Wolbachieae; Wolbachia.  
 REFERENCE 1 (bases 1 to 711)  
 AUTHORS Fiutek,N., Couger,B.M., Roy,S., de la Torre,J.R. and Connor,E.F.  
 TITLE Genomic assessment of the contribution of the Wolbachia  
 endosymbiont of Eurosta solidaginis to gall-induction  
 JOURNAL International Journal Molecular Sciences  
 REFERENCE 2 (bases 1 to 711)  
 AUTHORS Fiutek,N., Couger,B.M., Roy,S., de la Torre,J.R. and Connor,E.F.  
 TITLE Direct Submission  
 JOURNAL Submitted (10-FEB-2023) Biology, San Francisco State University,  
 1600 Holloway Ave, San Francisco, CA 94132, USA  
 COMMENT ##Genome-Assembly-Data-START##  
 Assembly Date :: JUN-2019  
 Assembly Method :: FLYE v. 06-2019  
 Genome Representation :: Full  
 Expected Final Version :: Yes  
 Genome Coverage :: 100.0x  
 Sequencing Technology :: Illumina HiSeq; PacBio Sequel  
 ##Genome-Assembly-Data-END##  
 FEATURES Location/Qualifiers  
 source 1..711  
 /organism="Wolbachia pipientis"  
 /mol\_type="genomic DNA"  
 /submitter\_seqid="contig\_44903"  
 /isolate="wEsol"  
 /isolation\_source="galls on Solidago altissima"  
 /host="Eurosta solidaginis MN-2018-EFC"  
 /db\_xref="taxon:955"  
 /environmental\_sample  
 /country="USA: Cowling Arboretum, Carleton College,  
 Northfield, MN"  
 /lat\_lon="44.48 N 93.13 W"  
 /altitude="280 m"  
 /collection\_date="2018-11"  
 /metagenome\_source="insect metagenome"  
 /note="metagenomic"  
 gene <1..151  
 /locus\_tag="wEsol\_00977"  
 CDS <1..151  
 /locus\_tag="wEsol\_00977"  
 /codon\_start=1  
 /transl\_table=11  
 /product="hypothetical protein"  
 /translation="LEEQNGKIGELMDKIDQMLPEQSEANWDNAHLSPLYVFQDTNTEF  
 TVIDV"  
 /besthit="qcoverage 100 , hcoverage 9.8989898989899 ,  
 similarity 100 , identity 100 , evaluate 3.01e-23 ,  
 alnlength 49 , Bacteria , Proteobacteria , WP\_209452423.1  
 MgtE intracellular N domain protein [Wolbachia

```

        endosymbiont of Ceratosolen solmsi]"
gene      261..629
          /locus_tag="wEsol_00978"
CDS       261..629
          /locus_tag="wEsol_00978"
          /codon_start=1
          /transl_table=11
          /fullproduct="qcoverage 100 , hcoverage 100 , similarity
100 , identity 100 , evalue 2.88e-77 , alnlength 122 ,
Bacteria , Proteobacteria , WP_015589302.1 MULTISPECIES:
hypothetical protein [unclassified Wolbachia]"
          /translation="MSKNSQNLVQNEDNFTTGNKEKLISALDLIILKTGTDKDIQDLG
KTASGHTVKKAVDALVNNINEQLISGLNIMLGEEQAKVKSLEDIIGNDDAGLKKDLSE
LAGKVNSMLPEEAPTHPDIL"
          /product="hypothetical protein"
          /besthit="qcoverage 100 , hcoverage 100 , similarity 100
, identity 100 , evalue 2.88e-77 , alnlength 122 ,
Bacteria , Proteobacteria , WP_015589302.1 MULTISPECIES:
hypothetical protein [unclassified Wolbachia]"

ORIGIN
    1 acttgaagag caaaatggaa agataggaga gcttatggat aagattgacc agatgcttcc
   61 tgagcaaagt gaagcaaatt gggataatgc acatctatca ccttacgtct ttcaagatac
  121 taatactgaa tttacagtaa tagatgttta gtgcgaactt ggatacttat aaattaatgt
  181 ttataagtta aaagaaaaaa cagtttgcac gtgaaactaa aaaataatTT aaactttaat
  241 aatttatgga ggtaatttat atgagcaaga actcgcaaaa cttgttacia aatgaggata
  301 attttactac tggtaataaa gaaaaactta taagcgctct tgatcttatt atacttaaga
  361 caggtactga taaggatata caagaccttg gcaaaacagc aagtgggtcat actgttaaaa
  421 aagcagttga tgcattagtt aataatataa atgaacaact tattagtggg ttgaatatta
  481 tgtaggaga agagcaagct aaagttaaaa gtttggaga tattataggc aacgatgatg
  541 caggattaaa aaagatcta agtgagttag caggtaaggt aaatagtatg ttacctgagg
  601 aggcaccaac ccacatctgat atattgtagt agttaggaaa gtaacagcct gatacaggct
  661 gttactcttt ccacatacca tttcagtgtg gctgagttga ttttaaaagt a

//
LOCUS      JAQZAU010000086                4103 bp    dna        linear    ENV 17-MAR-2023
DEFINITION MAG: Wolbachia pipientis isolate wEsol contig_44927, whole genome
            shotgun sequence.
ACCESSION  JAQZAU010000086 JAQZAU010000000
VERSION    JAQZAU010000086.1
DBLINK     BioProject: PRJNA929258
            BioSample: SAMN33142973
KEYWORDS   WGS; ENV; Metagenome Assembled Genome; MAG.
SOURCE     Wolbachia pipientis (insect metagenome)
  ORGANISM Wolbachia pipientis
            Bacteria; Pseudomonadota; Alphaproteobacteria; Rickettsiales;
            Anaplasmataceae; Wolbachieae; Wolbachia.
REFERENCE  1 (bases 1 to 4103)
  AUTHORS  Fiutek,N., Couger,B.M., Roy,S., de la Torre,J.R. and Connor,E.F.
  TITLE    Genomic assessment of the contribution of the Wolbachia
            endosymbiont of Eurosta solidaginis to gall-induction
  JOURNAL  International Journal Molecular Sciences
REFERENCE  2 (bases 1 to 4103)
  AUTHORS  Fiutek,N., Couger,B.M., Roy,S., de la Torre,J.R. and Connor,E.F.
  TITLE    Direct Submission
  JOURNAL  Submitted (10-FEB-2023) Biology, San Francisco State University,
            1600 Holloway Ave, San Francisco, CA 94132, USA
COMMENT    ##Genome-Assembly-Data-START##
            Assembly Date      :: JUN-2019
            Assembly Method     :: FLYE v. 06-2019
            Genome Representation :: Full
            Expected Final Version :: Yes

```

Genome Coverage :: 100.0x  
Sequencing Technology :: Illumina HiSeq; PacBio Sequel  
##Genome-Assembly-Data-END##

FEATURES

|        |                                                                                                                                                                                                                                                                                                                                                                                                                                                                                                                                                                                                                                                                                                                                                                                                                                                                                                                                      |
|--------|--------------------------------------------------------------------------------------------------------------------------------------------------------------------------------------------------------------------------------------------------------------------------------------------------------------------------------------------------------------------------------------------------------------------------------------------------------------------------------------------------------------------------------------------------------------------------------------------------------------------------------------------------------------------------------------------------------------------------------------------------------------------------------------------------------------------------------------------------------------------------------------------------------------------------------------|
| source | 1..4103<br>/organism="Wolbachia pipientis"<br>/mol_type="genomic DNA"<br>/submitter_seqid="contig_44927"<br>/isolate="wEsol"<br>/isolation_source="galls on Solidago altissima"<br>/host="Eurosta solidaginis MN-2018-EFC"<br>/db_xref="taxon:955"<br>/environmental_sample<br>/country="USA: Cowling Arboretum, Carleton College, Northfield, MN"<br>/lat_lon="44.48 N 93.13 W"<br>/altitude="280 m"<br>/collection_date="2018-11"<br>/metagenome_source="insect metagenome"<br>/note="metagenomic"                                                                                                                                                                                                                                                                                                                                                                                                                                 |
| gene   | complement(106..663)<br>/locus_tag="wEsol_00979"                                                                                                                                                                                                                                                                                                                                                                                                                                                                                                                                                                                                                                                                                                                                                                                                                                                                                     |
| CDS    | complement(106..663)<br>/locus_tag="wEsol_00979"<br>/codon_start=1<br>/transl_table=11<br>/fullproduct="qcoverage 100 , hcoverage 100 , similarity 100 , identity 100 , evalue 6.36e-134 , alnlength 185 , Bacteria;Eukaryota , Proteobacteria;Arthropoda , WP_006280485.1 MULTISPECIES: dCTP deaminase [Wolbachia]"<br>/cog="Dcd COG0717 183 Deoxycytidine deaminase"<br>/pfam="dUTPase"<br>/tigr="TIGR02274 dCTP_deam 180 deoxycytidine triphosphate deaminase"<br>/product="dCTP deaminase"<br>/translation="MAVMPPDKWIREKAENFGMIEPFVNHKSSKGVISFGLSSYGYDARVDNKFKIFTNVNSAIVDPKNFSENSFIDKETDVCIIPPNSFVLASTVEYFRIPRNVLVICVGKSTYARCGIIVNVTPLPGWEGHVTLEFSNTTPLPAKIYANEGACQFVFLSGESECEKSYDDMKGKYMNQHGITLPLVK"<br>/besthit="qcoverage 100 , hcoverage 100 , similarity 100 , identity 100 , evalue 6.36e-134 , alnlength 185 , Bacteria;Eukaryota , Proteobacteria;Arthropoda , WP_006280485.1 MULTISPECIES: dCTP deaminase [Wolbachia]" |
| gene   | 805..1821<br>/locus_tag="wEsol_00980"                                                                                                                                                                                                                                                                                                                                                                                                                                                                                                                                                                                                                                                                                                                                                                                                                                                                                                |
| CDS    | 805..1821<br>/locus_tag="wEsol_00980"<br>/codon_start=1<br>/transl_table=11<br>/fullproduct="qcoverage 100 , hcoverage 100 , similarity 100 , identity 100 , evalue 3.09e-240 , alnlength 338 , Bacteria , Proteobacteria , WP_155968901.1 MULTISPECIES: substrate-binding domain-containing protein [Wolbachia]"<br>/cog="PstS COG0226 318 ABC-type phosphate transport system, periplasmic component"<br>/pfam="PBP_like_2"<br>/tigr="TIGR02136 ptsS_2 295 phosphate binding protein"<br>/product="substrate-binding domain-containing protein"<br>/translation="MLRNFLLIFFVFLFMPLSNADARKYIRIVGSSTVFPFISFIAEE"                                                                                                                                                                                                                                                                                                                     |

```

FNRVFSFKTPVVESIGSGSGFKMFCSGIGEDTPDITTSSRPMKEVERELCKRNKINEV
IEIIIGYDGIVIANSNQSHRFDFTKKDLFETLSVYSQENDKLVKNNKKFWSDVNQALP
KTEIEIYGPHQNTGTYYETLVNSIMLDQYSCMNSKIFKENYKDQEERKKACGNIRDDGR
YIEVGINENIIIQKLKSNKNALGIFSFSFLMRNQDKIQGSTIAGIEPTYENISSGKYI
LARPLYLYIKREHLDTVDGLREFVKEIIDSIGIEGGYLSRLGLIPLSSEDIKKASAKV
YDIT"
/gene besthit="qcoverage 100 , hcoverage 100 , similarity 100
, identity 100 , evalue 3.09e-240 , alnlength 338 ,
Bacteria , Proteobacteria , WP_155968901.1 MULTISPECIES:
substrate-binding domain-containing protein [Wolbachia]"
CDS complement(1898..3115)
/locus_tag="wEsol_00981"
complement(1898..3115)
/locus_tag="wEsol_00981"
/codon_start=1
/transl_table=11
/fullproduct="qcoverage 100 , hcoverage 100 , similarity
100 , identity 100 , evalue 4.39e-283 , alnlength 405 ,
Bacteria , Proteobacteria , WP_155968902.1 MULTISPECIES:
hypothetical protein [Wolbachia]"
/translation="MVELTDIQTNIQNSLIQAILCGNLLLEVQNMFKDSEDSNIQKILR
LEWISNELRNTVLRVAIDSYNIQDQEKAIEIIELIWQKADQRTDRFLCSAEYDSAEGG
SVSTINMLRDLQGQGRNTDSNNGFVLGEVIQEMEEHKRVMGLDSNLQEAIEDLDVNRV
KAVLENCGADAARVLERCVYWDGSDVALLVYPLLNYDRELNQEDVEKIKESFKLMF
DAASPGLLGFEPNENNYVMDKLTCAQKRFAKIPGVGEQCFQDLIQEFEEKLSKNELDN
AKTDDQIAWDKEYATRFSQEINQDPSENDDLNFIDDTDLQNTVNSAPTADNKTPEKN
DTNFWSEHKGKIALGVTGLCVAGAVAAAYMLAYPVVALALTVLAAVILMGAGIAKVLED
PSVEKTFTQQQKA"
/product="hypothetical protein"
/gene besthit="qcoverage 100 , hcoverage 100 , similarity 100
, identity 100 , evalue 4.39e-283 , alnlength 405 ,
Bacteria , Proteobacteria , WP_155968902.1 MULTISPECIES:
hypothetical protein [Wolbachia]"
CDS 3247..3627
/locus_tag="wEsol_00982"
3247..3627
/locus_tag="wEsol_00982"
/codon_start=1
/transl_table=11
/fullproduct="qcoverage 100 , hcoverage 100 , similarity
100 , identity 100 , evalue 1.16e-87 , alnlength 126 ,
Bacteria , Proteobacteria , AOV87106.1 transposase
[Wolbachia endosymbiont of Drosophila incompta]"
/cog="COG3293 COG3293 124 Transposase and inactivated
derivatives"
/pfam="DUF4096"
/product="transposase"
/translation="MRKKYPTDLSEREWARIKHFVRVSYKKGGRPPKYSKREILEAIF
YVLRITGCQWRYLPNDFPLWKTVYEQFRQWKKQGIFEKMNIEITKYSRRKIGRNEQPSA
CIVDSQSVKTEKGGSKAMMEVKK"
/gene besthit="qcoverage 100 , hcoverage 100 , similarity 100
, identity 100 , evalue 1.16e-87 , alnlength 126 ,
Bacteria , Proteobacteria , AOV87106.1 transposase
[Wolbachia endosymbiont of Drosophila incompta]"
CDS 3738..4079
/locus_tag="wEsol_00983"
3738..4079
/locus_tag="wEsol_00983"
/codon_start=1
/transl_table=11

```

```

/fullproduct="qcoverage 100 , hcoverage 100 , similarity
100 , identity 100 , evalue 1.53e-79 , alnlength 113 ,
Bacteria , Proteobacteria , AAS13810.1 transposase, IS5
family, OrfB [Wolbachia endosymbiont of Drosophila
melanogaster]"
/cog="COG3293 COG3293 124 Transposase and inactivated
derivatives"
/pfam="DDE_Tnp_1_2 DDE_Tnp_1"
/product="transposase, IS5 family, OrfB"
/translation="MRTKYTKVKKMWADMGYQGRNLKNHIKEEYDIDIEIVKRPPCRF
WVHKDTPPELLPTREQGFKVQPRRWVVERTFAWVNRNRRLSKEYDLLTTSTENFIYLA
MSRVMLKREYA"
/besthit="qcoverage 100 , hcoverage 100 , similarity 100
, identity 100 , evalue 1.53e-79 , alnlength 113 ,
Bacteria , Proteobacteria , AAS13810.1 transposase, IS5
family, OrfB [Wolbachia endosymbiont of Drosophila
melanogaster]"

```

# ORIGIN

```

1 taaataattg aagtttttaa ttaagaaaag cacatgatgt agctataatt attgtaagca
61 acaatgaaaa agtacggaag tgaaaaatta ccactctcat ggcaatcact tcaccagcgg
121 caaagtgata ccatgctgat tcatatatatt tcctttcata tcatcatatg atttctcgca
181 ttcactttcg ccgcttaaaa atacgaattg gcatgcgctt tcattagcgt aaattttcgc
241 aggaagcgga gtggtgtttg agaattcgag tgtgacatga cttcccatc caggttctaa
301 gggagtaacg tttactataa ttccacatct tgcgtaagtt gatttaccac cacaatgac
361 cagtacattc cttggtatac gaaaatattc cactgtgctt gcaagtacga aactatttgg
421 tggaattatg catacatctg tttccttatc tataaaacta ttctcagaaa aatttttagg
481 gtccacgata gctgaattaa cgtagtaaaa aatttttaaat ttattatcca ctcttgcac
541 gtaaccataa gatgatagtc cgaaagatat aacacctttg ctgcttttgg ggttcacaaa
601 aggttctatc attccaaaat tttcagcttt ttctcttatc catttatctg gcataactgc
661 cataattgcc ccttaaagtt gtgtaatact tacaataata taaaataaaa tttaaatgta
721 aactgtagct tttgtcatgc aattaaagct tttcagtttg attttttggg acaataatta
781 gatttatggt ctttaactaaa aataatgctt agaaactttc tcctgatttt tgtattcgta
841 ttattcatgc cgctgtcaaa tgctgatgcc aggaaatata tcagaattgt tgggtcctca
901 actgtttttc cttttatctc atttatagcc gaggagttca atcgtgtatt ctcctttaag
961 actccagttg tggaatcgat aggaagtgga tcaggattca aaatgttttg ctcaggaata
1021 ggggaagaca ctccagacat caccacttca tctcgcccta tgaaggaagt agaaagagaa
1081 ctatgtaaaa gaaataaaaat taatgaagtg atagagatca tcattggcta tgatggaatt
1141 gtcattgcaa attcaaatca aagccataga tttgatttca caaagaagga cttatttgaa
1201 actttatctg tatattctca agaaaatgat aaattagtaa aaaataataa gaagttttgg
1261 tctgatgtaa atcaagcctt accaaaaaca gaaattgaaa tttatgggtc acatcaaaat
1321 acaggcacat acgaaaactt gggttaattct attatgcttg atcaatattc atgtatgaac
1381 tcgaaaattt ttaaagagaa ttataaagat caggaagaaa gaaagaaagc atgttggaat
1441 ataagggatg atggaaggta tatagaagtt ggaattaatg aaaatataat aatacaaaaa
1501 ttgaaaagta acaagaacgc cttagggata tttagtttca gctttttaat gaggaatcaa
1561 gataaaatac aaggggagcac aattgcagga attgagccaa cttacgaaaa tatatcatcg
1621 ggaaaatata tattagcaag acctctatac ctttacataa agaggggaaca cttggatact
1681 gttgatggat taagagaatt cgtaaaaagaa attatagatt caatcggtat tgaagggtgg
1741 tacctatcta ggcttgggtc aattccactt tcaagtgaag atataaagaa agcttcagca
1801 aaagtttatg atataacgtg acggcaacac ttcttttata ttctttgttc tagcgtagtc
1861 agaccagca cggcgcgctg ggatgacatt attaacgtta tgctttttgt tgttgtgtaa
1921 acgttttttc tacacttgga tcttctaaaa ccttagcaat accagcacc attaatataa
1981 ctgctgcaa aactgttaaa gccagtgcaa ctacaggata cgctagcata taggctgcaa
2041 cagcaccagc tacgcatagt ccagtaacgc ctagagcgat cttccctttg tgttcaactc
2101 agaagtttgt atcgtttttt tctgggggtt tgttgtctgc agttgggtgca gagtttacgg
2161 tgttttgatc tagatcagtg tcatctataa agttaagatc atcattctca gacggatcct
2221 gattgatttc ttgtgaaaat cgagtcgcat actctttatc ccatgctatc tgatcatcag
2281 tcttggcatt atctagttca tttttactaa gtttttcctc aaattcttga atcaaatctt
2341 gaaagcattg ctcacctact ccaggtatct tagcaaaaacg tttttgtgca catgtaagtt
2401 tatccattac atagtatttt tcattgggct cgaacccaag gagccctgga gaagcagcat
2461 caaacattaa tttaaagctt tcttttatct tttccacatc ttcttggttc aattctctat

```

```

2521 catagttaac cagcagagga taaactaaaa gggcatctac gcttccatca tcccaatata
2581 cacatcgctc taaaaccctt gctgcatctg caccacaatt ctctaatact gctttaactc
2641 gattaacatc aaggtcttct attgtcttct gtaagttgga atcaagaccc attaccctct
2701 tgtgctcttc catttcttga ataacttctc caagaacaaa tccgttatta gaatcgttgg
2761 tccttccttg cccttgcagg tctctaagca tatttattgt gctaacacta ccaccttctg
2821 ctgaatcgta ttctgcacta cacaaaaaat cagcagttct ttgatcagct ttctgccaaa
2881 ttagttcaat gatctctata gctttctctt gatcttgaat gttataagag tcaatagcaa
2941 cccttaaaac ggtatttctg agttcattag aaatccactc aagtctcaaa attttttgta
3001 tattactatc ttcactatct ttgaacatgt tctggacttc tagaagattg ccacacaaga
3061 ttgcttgat taatgagttt tgaatgtttg tttgtatatc agttaattca accatatctt
3121 acctctaata aaaatttaat tatcacacat atttagaggt tgtccggaaa taagtaaaag
3181 gctataagag gttgtccgga aataagtaaa aggctataat atctgaaatt ttagtacggg
3241 gtaaagatga gaaaaaagta tccaacagat ctaagcgaaa gggaatgggc aagaatagaa
3301 aaacacttca gagtatcata caagaaagga ggaaggccgc caaagtatag caaaagagaa
3361 atattagaag caattttcta tgtattgcgt acagggtgtc aatggcggtta tttaccaa
3421 gattttccgc tatggaagac tgtgtatgag cagttcaggc aatggaagaa gcagggaatt
3481 tttgagaaaa tgaattatga aattacaaaa tatagtagaa gaaaaatagg aaggaaatgag
3541 cagccgagtg cctgtatagt agatagtcaa tctgtaaaga ctacagaaaa ggggggatca
3601 aaggctatga tggaagtaaa aaagtaaagg gtagaaaaag gcatataatt acagacactc
3661 agggttttat actaggttgt tacgtaggcg ctgctaacga aaatgataga gatggtatta
3721 aaatagcatt aaacaatatg agaacaaaat atactaaagt taaaaaaatg tgggctgaca
3781 tgggatacca aggaagaaat ttaaagaatc acataaagga agaatatgac atagatattg
3841 aaattgttaa aaggcctcca tgtagatttt ggggtgcacaa agatacgcca cctgagctac
3901 taccaacaag agaacaaggg tttaaagtac agccaagaag atgggttgta gaaaggactt
3961 ttgcttgggt taataggaat agaaggctat cgaaggagta tgatttactc acaacatcca
4021 ctgagaattt catataccta gctatgagta gggttatgtt aaagagggaa tatgcttgaa
4081 tttactagtt tccggacaac ctc

```

//

```

LOCUS      JAQZAU010000087                2261 bp    dna        linear    ENV 17-MAR-2023
DEFINITION MAG: Wolbachia pipientis isolate wEsol contig_45117, whole genome
            shotgun sequence.
ACCESSION  JAQZAU010000087 JAQZAU010000000
VERSION    JAQZAU010000087.1
DBLINK     BioProject: PRJNA929258
            BioSample: SAMN33142973
KEYWORDS   WGS; ENV; Metagenome Assembled Genome; MAG.
SOURCE     Wolbachia pipientis (insect metagenome)
  ORGANISM Wolbachia pipientis
            Bacteria; Pseudomonadota; Alphaproteobacteria; Rickettsiales;
            Anaplasmataceae; Wolbachieae; Wolbachia.
REFERENCE  1 (bases 1 to 2261)
  AUTHORS  Fiutek,N., Couger,B.M., Roy,S., de la Torre,J.R. and Connor,E.F.
  TITLE    Genomic assessment of the contribution of the Wolbachia
            endosymbiont of Eurosta solidaginis to gall-induction
  JOURNAL  International Journal Molecular Sciences
REFERENCE  2 (bases 1 to 2261)
  AUTHORS  Fiutek,N., Couger,B.M., Roy,S., de la Torre,J.R. and Connor,E.F.
  TITLE    Direct Submission
  JOURNAL  Submitted (10-FEB-2023) Biology, San Francisco State University,
            1600 Holloway Ave, San Francisco, CA 94132, USA
COMMENT    ##Genome-Assembly-Data-START##
            Assembly Date      :: JUN-2019
            Assembly Method     :: FLYE v. 06-2019
            Genome Representation :: Full
            Expected Final Version :: Yes
            Genome Coverage      :: 100.0x
            Sequencing Technology :: Illumina HiSeq; PacBio Sequel
            ##Genome-Assembly-Data-END##
FEATURES   Location/Qualifiers
  source    1..2261

```

```

/organism="Wolbachia pipientis"
/mol_type="genomic DNA"
/submitter_seqid="contig_45117"
/isolate="wEsol"
/isolation_source="galls on Solidago altissima"
/host="Eurosta solidaginis MN-2018-EFC"
/db_xref="taxon:955"
/environmental_sample
/country="USA: Cowling Arboretum, Carleton College,
Northfield, MN"
/lat_lon="44.48 N 93.13 W"
/altitude="280 m"
/collection_date="2018-11"
/metagenome_source="insect metagenome"
/note="metagenomic"
gene complement(82..717)
CDS /locus_tag="wEsol_00984"
complement(82..717)
/locus_tag="wEsol_00984"
/codon_start=1
/transl_table=11
/pfam="DDE_Tnp_1 rve DDE_Tnp_1_2"
/fullproduct="qcoverage 100 , hcoverage 100 , similarity
100 , identity 100 , evalue 2.85e-152 , alnlength 211 ,
Bacteria , Proteobacteria , WP_081600764.1 MULTISPECIES:
transposase [unclassified Wolbachia]"
/translation="MIAENNMEDIEIAIDSTGISIYNNTPGHSKENSTDRKYRGYEQT
RKLHVMLNINNKKAIAVKYSNGVYSDHYGACDLLKEVDFQHAIAKALYADRACDRHKFY
KLCNEYDIKTKIPPINNAAEHPEIDYMSDRNAAIRLIKLYGEDGMKEWKKEVNYGKRS
YIEGFFSRLKQIFGFSFRNKSEINREKELLIKCYLLNKFTDIGMAKFEIVT"
/product="transposase"
/besthit="qcoverage 100 , hcoverage 100 , similarity 100
, identity 100 , evalue 2.85e-152 , alnlength 211 ,
Bacteria , Proteobacteria , WP_081600764.1 MULTISPECIES:
transposase [unclassified Wolbachia]"
gene complement(701..1030)
CDS /locus_tag="wEsol_00985"
complement(701..1030)
/locus_tag="wEsol_00985"
/codon_start=1
/transl_table=11
/pfam="DDE_Tnp_1_5"
/fullproduct="qcoverage 100 , hcoverage 100 , similarity
100 , identity 100 , evalue 4.31e-75 , alnlength 109 ,
Bacteria , Proteobacteria , WP_141456678.1 MULTISPECIES:
transposase [unclassified Wolbachia]"
/translation="MPQKMRVSNCHEYNKFLQERGSIFCYINDAIENWYENCPKMQGG
NYIYSDKVVILVHIIVSFFRIGLRQTVGFIKGYLQQIGRDLAVISYSQASRRFKKLNI
KINDCRK"
/product="transposase"
/besthit="qcoverage 100 , hcoverage 100 , similarity 100
, identity 100 , evalue 4.31e-75 , alnlength 109 ,
Bacteria , Proteobacteria , WP_141456678.1 MULTISPECIES:
transposase [unclassified Wolbachia]"
gene 1275..>2261
CDS /locus_tag="wEsol_00986"
1275..>2261
/locus_tag="wEsol_00986"
/codon_start=1
/transl_table=11

```

```

/product="hypothetical protein"
/translation="MASKSSEWAKNEFGDKRLTDRLVKIADSLISLPESINEACGSW
SEAKAAYRFFQENENVKESDILATHINKTVERTKAHKRVLVIQDTSYIVYNNHKKTSGL
ANLSSYDTAKGIIMHTALAVSIEGLVLGILDQKVYSRPEETENLKKKSDRIEDKESVK
WLETLRKTNNIIDPTQTETITVCDREADIYDFFELAHNLSAVLVRACRDRAVNRKSR
YPEKGEQKLWAFIKSSHCACTVEVEVPVKDNKPKRTARLEVRFGKFMMNPSKNNIRHK
TEELPKLPLYAVYVVEKTPLPLKKPLEWMLLTNLSVNTFDEAVEKISWYCLRW"
/besthit="qcoverage 102.431610942249 , hcoverage
71.7021276595745 , similarity 88.1 , identity 79.2 ,
evalvalue 6.85e-183 , alnlength 337 , Viruses , Uroviricota
, BAA89624.1 orf5 [Wolbachia phage WO]"

```

# ORIGIN

```

1 cctcttcttg tcatccaagt agcatgacac tgggatggct ttgttgcac acactttatg
61 agatgggtgat ttatggtaaa ttcattgtaac tatctcaaat ttagccatac caatatcagt
121 gaatttatta agcaaatagc atttgattag cagttctttt tctcgattta tctcagattt
181 attcctaaaa ctaaatccga atatttgctt taatcttgag aaaaaccctt caatataaga
241 tcttttccca taatttactt cttttttcca ttctttcatg ccatcttcac cgtataattt
301 tattaaccta atagcagcat tcctgtcaga catataatct atttctggat gttctgccgc
361 attgtttatt ggtggaattt ttgtctttat atcatattcg ttacacaact tataaaactt
421 gtgcctatca catgctctat ctgcatatag tgcttttatg gcatgctgaa aatcaacttc
481 ttttagcaaa tcacaagctc catagtgatc agagtagaca ccgttactgt attttacagc
541 tatggctttt ttgttggtta tattcaacat tacgtgcaat tttctcgttt gctcatagcc
601 acgatatttt ctgtcagtcg tattttcctt gctgtgacca ggagtgttgt tgtatatact
661 aattcctgta ctgtctatag caatttcgat atcttccata ttattttctg caatcattta
721 tcttaataat aagtttctta aaccttcttg atgcttgatg atagctgata actgccaagt
781 ctcttcctat ttgttgcaaa taccctttta taaacccgac tgtttgtctt aaaccaattc
841 taaagaaact gacgattata tgcacaaaaa tcacaacttt atcactataa atatagttgc
901 cgccctgcat ttttgacaaa ttctcgtacc aattttctat ggcgtcattg atatacaaaa
961 aaatgcttcc tctttcttgg agaaatttgt tatattcatg gcagttactg actctcattt
1021 tttgtggcat attttttctt caacagttaa atggctattt ataatagaatt ttgtcagtaa
1081 ctgccagttc ttttcacttg agcgatgcaa caaagccac tggaatccag tttcaccttg
1141 tgatgggtgc atgaaagtag ctgacactgg tttccatcca agacgggtgc attccttact
1201 attaccacaa aatataaatg gactaaaaag taaaatatta caatattaaa gtttgcaaat
1261 attgaggggtg taaaatggca agtaaaagta gtgaatgggc taaaatgaa tttggagata
1321 aaagattaac tgaccgatta gtaaaagattg ctgatagttt gataagttta cctgaaagct
1381 caattaatga ggcatgcgga agttgggtcag aagcaaaagc agcataccgt ttttttcaaa
1441 atgagaatgt aaaagaaagt gatatttttag ctacacatat taataagacg gttgagagaa
1501 caaaagctca caagaggggtt cttgtcattc aagataccag ttacattgta tataataacc
1561 ataaaaaaac aagcggatta gcaaatttgt ccagttatga tactgcaaaa ggtattataa
1621 tgcatacagc tcttgccgtt agtatagaag gtttggtact agggatacta gatcaaaaag
1681 tttattcaag acctgaagaa actgagaacc ttaaaaaaaa gagcgatcgc attgaagata
1741 aagaaagcgt aaagtgggtg gaaactttta gaaaaacaaa taatattatt gatccaactc
1801 aaactgagac tataactgta tgcgatagag aagcagatat atatgacttt tttgagcttg
1861 cacataatct taattcggca gtgctagtta gagcatgcag agatagagca gtaaatagaa
1921 aatctcgata tcctgaaaaa ggtgagcaga agttatgggc atttattaaa tcctctcatt
1981 gtgcaggtac ggtagaagtt gaagttcctg taaaagataa taagccaaaa agaacagcac
2041 gtttggaagt tagatttgga aagtttatga tgaatccatc taagaataat attaggcata
2101 agacggaaga actacctaaa ttaccacttt atgcagttta tggtgttgag aaaactcccc
2161 ttcccttaaa aaaaccgcta gaatggatgc tattaacgaa tctttcagtt aatactttcg
2221 atgaagctgt tgaaaaaatt agttggtatt gccttagatg g

```

//

```

LOCUS      JAQZAU010000088      1960 bp      dna      linear      ENV 17-MAR-2023
DEFINITION MAG: Wolbachia pipientis isolate wEsol contig_45189, whole genome
            shotgun sequence.
ACCESSION  JAQZAU010000088  JAQZAU010000000
VERSION    JAQZAU010000088.1
DBLINK     BioProject: PRJNA929258
            BioSample: SAMN33142973
KEYWORDS   WGS; ENV; Metagenome Assembled Genome; MAG.
SOURCE     Wolbachia pipientis (insect metagenome)

```

ORGANISM *Wolbachia pipientis*  
 Bacteria; Pseudomonadota; Alphaproteobacteria; Rickettsiales;  
 Anaplasmataceae; Wolbachieae; Wolbachia.

REFERENCE 1 (bases 1 to 1960)  
 AUTHORS Fiutek,N., Couger,B.M., Roy,S., de la Torre,J.R. and Connor,E.F.  
 TITLE Genomic assessment of the contribution of the Wolbachia  
 endosymbiont of *Eurosta solidaginis* to gall-induction  
 JOURNAL International Journal Molecular Sciences

REFERENCE 2 (bases 1 to 1960)  
 AUTHORS Fiutek,N., Couger,B.M., Roy,S., de la Torre,J.R. and Connor,E.F.  
 TITLE Direct Submission  
 JOURNAL Submitted (10-FEB-2023) Biology, San Francisco State University,  
 1600 Holloway Ave, San Francisco, CA 94132, USA

COMMENT ##Genome-Assembly-Data-START##  
 Assembly Date :: JUN-2019  
 Assembly Method :: FLYE v. 06-2019  
 Genome Representation :: Full  
 Expected Final Version :: Yes  
 Genome Coverage :: 100.0x  
 Sequencing Technology :: Illumina HiSeq; PacBio Sequel  
 ##Genome-Assembly-Data-END##

FEATURES Location/Qualifiers  
 source 1..1960  
 /organism="Wolbachia pipientis"  
 /mol\_type="genomic DNA"  
 /submitter\_seqid="contig\_45189"  
 /isolate="wEsol"  
 /isolation\_source="galls on *Solidago altissima*"  
 /host="Eurosta solidaginis MN-2018-EFC"  
 /db\_xref="taxon:955"  
 /environmental\_sample  
 /country="USA: Cowling Arboretum, Carleton College,  
 Northfield, MN"  
 /lat\_lon="44.48 N 93.13 W"  
 /altitude="280 m"  
 /collection\_date="2018-11"  
 /metagenome\_source="insect metagenome"  
 /note="metagenomic"  
 gene complement(<1..1003)  
 /locus\_tag="wEsol\_00987"  
 CDS complement(<1..1003)  
 /locus\_tag="wEsol\_00987"  
 /codon\_start=1  
 /transl\_table=11  
 /product="hypothetical protein"  
 /pfam="Carboxyl\_trans"  
 /tigr="TIGR01117 mmdA 512 methylmalonyl-CoA decarboxylase  
 alpha subunit"  
 /translation="MQDFKILENLKTKALEAEKGGGSDRITKQHEKGKLTARERLSIL  
 LDESSFAEYDKFVKHHANDFGMQNANFLGDGVVIGHGTIYGRKVFVYSQDFTVFGGSL  
 GASHAKKICKIMDMAINARVPIIGLNDSSGGARIQEGVNSLAGYGEIFQRNVNASGVIP  
 QISLIMGPCAGGAVYSPALTDFTFMVKNSSYMFITGPDVVKKVTYEDVSFEDLGGAKI  
 HTSKTGVADFAFNNDVEMLLKMRFFFTFLPANNQESPKSAPICNDVDDIDESLNTLIP  
 TNPNTPYDMYELIEKVCDERNFFELKPDFARNIITGFGRIGGNTVGIVANQPMHLAC  
 "  
 /cog="COG4799 COG4799 526 Acetyl-CoA carboxylase,  
 carboxyltransferase component (subunits alpha and beta)"  
 /besthit="qcoverage 100 , hcoverage 65.748031496063 ,  
 similarity 100 , identity 100 , evaluate 6.22e-241 ,  
 alnlength 334 , Bacteria , Proteobacteria ,

```

WP_182319748.1 acyl-CoA carboxylase subunit beta
[Wolbachia pipientis]"
gene complement(1111..1413)
/locus_tag="wEsol_00988"
CDS complement(1111..1413)
/locus_tag="wEsol_00988"
/codon_start=1
/transl_table=11
/pfam="Pfam-B_5362"
/fullproduct="qcoverage 100 , hcoverage 100 , similarity
99.0 , identity 99.0 , evalue 3.88e-58 , alnlength 100 ,
Bacteria , Proteobacteria , WP_010963066.1 MULTISPECIES:
hypothetical protein [Wolbachia]"
/translation="MQGKVKMTFRVGDEKIEMLSSSEKAESFGKIMVHMDDKSCEIFS
KYLKELEKEPRISKVVEAAKSFAQTKSSAVSPPLSNMKSVDTSQHFQSSDHESPEH"
/product="hypothetical protein"
/besthit="qcoverage 100 , hcoverage 100 , similarity 99.0
, identity 99.0 , evalue 3.88e-58 , alnlength 100 ,
Bacteria , Proteobacteria , WP_010963066.1 MULTISPECIES:
hypothetical protein [Wolbachia]"
gene complement(1438..1794)
/locus_tag="wEsol_00989"
CDS complement(1438..1794)
/locus_tag="wEsol_00989"
/codon_start=1
/transl_table=11
/pfam="Pfam-B_5362"
/fullproduct="qcoverage 100 , hcoverage 100 , similarity
100 , identity 100 , evalue 3.56e-76 , alnlength 118 ,
Bacteria , Proteobacteria , WP_227738564.1 hypothetical
protein [Wolbachia endosymbiont of Drosophila simulans]"
/translation="MEQDKNVTETGKEKLRLMLEMFNLVSTGTDVQSQEVRRLLPEDI
LKERGEYLSRLKQIVSDSIENDKKKEIVVERDNKFYYVQCPEKSVITPAKFMNSPEFK
DLEYGALRIGEGDNLII"
/product="hypothetical protein"
/besthit="qcoverage 100 , hcoverage 100 , similarity 100
, identity 100 , evalue 3.56e-76 , alnlength 118 ,
Bacteria , Proteobacteria , WP_227738564.1 hypothetical
protein [Wolbachia endosymbiont of Drosophila simulans]"
gene complement(1827..>1960)
/locus_tag="wEsol_00990"
CDS complement(1827..>1960)
/locus_tag="wEsol_00990"
/codon_start=1
/transl_table=11
/pfam="Pfam-B_5362"
/fullproduct="qcoverage 100 , hcoverage 95.55555555555556
, similarity 100 , identity 100 , evalue 6.41e-21 ,
alnlength 43 , Bacteria , Proteobacteria , RLT63004.1
hypothetical protein WANA13_1216, partial [Wolbachia
endosymbiont of Drosophila ananassae]"
/translation="PEHLPNDEAIENIAKRLQKSIDDAKKHKVMFSVDVFQGEKSHQ"
/product="hypothetical protein WANA13_1216,
partial"
/besthit="qcoverage 100 , hcoverage 95.55555555555556 ,
similarity 100 , identity 100 , evalue 6.41e-21 ,
alnlength 43 , Bacteria , Proteobacteria , RLT63004.1
hypothetical protein WANA13_1216, partial [Wolbachia
endosymbiont of Drosophila ananassae]"

```

```

1 aacatcctgc aaggtgcata ggttgatttg caacaatacc gacagtatTT cctccaattc
61 taccaaaacc agttatgata ttacgagcaa aatcaggTTT cagttcaaag aaattccttt
121 catcacaaac tttttcaatg agttcataca tatcataagg agtattagga ttggtaggaa
181 ttagagtgtt taaggattca tcaatgtcgt caacatcatt acagattggt gcagattttg
241 gtgattcttg attatttgct ggtaagaaag taaagaattc acgcattttt agcagcattt
301 caacatcatt attgaatgca aaatccgcta ctctgtttt gcttgatga atttttgctc
361 caccgaggtc ttcaaaactt acatcttcgt aggtaacctt ttttactaca tctggcccg
421 ttataaacat atatgaactg tttttacca tgaaagtaaa gtcagttaat gctggggaat
481 aaactgcacc tcttgcacat gggcccataa ttaaagaaat ttgtggtata acacccgatg
541 catttacgtt tctttgaaaa atttctccat aaccagcaag agaatttact ccttcttgaa
601 ttctggctcc accagaatca tttagtccga taattggaac tctggcatta attgccatat
661 ccataatttt gcataatttt tttgcatgtg acgcaccaag tgaaccacca aagacagtaa
721 aatcctgaga ataaacaaaa acttttctgc cataaatagt accatgacca atcactaccc
781 catcacctaa aaaattagca ttttgcattg caaaatcatt tgcattgatg tttacgaatt
841 tatcgtattc tgcaaaagaa ctttcatcga gcaatatact gagcctttct ctacgagtta
901 atttcccttt ttcattgtgt ttggtaatcc tgcagaacc gcctcctttt tcagcttcta
961 gtgctttggt ttttagattt tctagtattt taaagtcttg catacaataa agtagttttc
1021 aaattagttg tagactttat taagtttaca aaccctacta actatacaca tacactattg
1081 ctatatgcaa caatgtatgt atgataattg ttaatgctct ggtgattcat ggtcactact
1141 ttgaaaatgt tgcgatgtgt caacactttt catattagaa agaggtggac taactgcact
1201 gctttttgtt tgtgcaaaac ttttagcagc ttcaacaacc ttgcttatac gaggttcttt
1261 ttctagctct tttaggtagt ttgagaagat ttcacaactt ttgtcatcca tatgtaccat
1321 tattttacca aaactttcag ctttttcaga agataaaatc atttcgatct tttcatcgcc
1381 taccctaaag gtcattttta ctttgccttg catatcatga tattgccagc tttttattca
1441 gattagatta tctccttctc ctattcgcaa tgcaccatat tctaagtcct taaattccgg
1501 ggagttcata aattttgcag gagtgatcac acttttttct ggacactgta cataataaaa
1561 tttattatct ctttctacta caatttcttt tttttgtca ttttcaatac tatcacttac
1621 aatttgTTTT agacgtgaca aatattcgcc gcgttctttc agtatatctt ctggcaataa
1681 tctccgaact tcttggtcga catcagtgcc tgttgaaact agattaaaca tttctaacat
1741 aagaggccgt agtttttctt ttccagtctc agtaacattt ttatcttgct ccatgagggtg
1801 gtataagatc agtatcgaat aatctattat tgatgacttt tttctccttg gaatacatca
1861 acactaaaca tgaccttggt cttttttgca tcgtctatag atttttgaag tctctttgct
1921 atgttttcga tagcttcacg attaggtaat tgttcaggca

```

//

```

LOCUS      JAQZAU010000089          12854 bp    dna        linear    ENV 17-MAR-2023
DEFINITION MAG: Wolbachia pipientis isolate wEsol contig_45501, whole genome
            shotgun sequence.
ACCESSION  JAQZAU010000089  JAQZAU010000000
VERSION    JAQZAU010000089.1
DBLINK     BioProject: PRJNA929258
            BioSample: SAMN33142973
KEYWORDS   WGS; ENV; Metagenome Assembled Genome; MAG.
SOURCE     Wolbachia pipientis (insect metagenome)
ORGANISM   Wolbachia pipientis
            Bacteria; Pseudomonadota; Alphaproteobacteria; Rickettsiales;
            Anaplasmataceae; Wolbachieae; Wolbachia.
REFERENCE  1 (bases 1 to 12854)
AUTHORS    Fiutek,N., Couger,B.M., Roy,S., de la Torre,J.R. and Connor,E.F.
TITLE      Genomic assessment of the contribution of the Wolbachia
            endosymbiont of Eurosta solidaginis to gall-induction
JOURNAL     International Journal Molecular Sciences
REFERENCE  2 (bases 1 to 12854)
AUTHORS     Fiutek,N., Couger,B.M., Roy,S., de la Torre,J.R. and Connor,E.F.
TITLE      Direct Submission
JOURNAL     Submitted (10-FEB-2023) Biology, San Francisco State University,
            1600 Holloway Ave, San Francisco, CA 94132, USA
COMMENT     ##Genome-Assembly-Data-START##
            Assembly Date      :: JUN-2019
            Assembly Method     :: FLYE v. 06-2019
            Genome Representation :: Full

```

Expected Final Version :: Yes  
Genome Coverage :: 100.0x  
Sequencing Technology :: Illumina HiSeq; PacBio Sequel  
##Genome-Assembly-Data-END##

FEATURES

|        |                                                                                                                                                                                                                                                                                                                                                                                                                                                                                                                                                                                                                                                                                                                                                                                                                                       |
|--------|---------------------------------------------------------------------------------------------------------------------------------------------------------------------------------------------------------------------------------------------------------------------------------------------------------------------------------------------------------------------------------------------------------------------------------------------------------------------------------------------------------------------------------------------------------------------------------------------------------------------------------------------------------------------------------------------------------------------------------------------------------------------------------------------------------------------------------------|
| source | 1..12854<br>/organism="Wolbachia pipientis"<br>/mol_type="genomic DNA"<br>/submitter_seqid="contig_45501"<br>/isolate="wEsol"<br>/isolation_source="galls on Solidago altissima"<br>/host="Eurosta solidaginis MN-2018-EFC"<br>/db_xref="taxon:955"<br>/environmental_sample<br>/country="USA: Cowling Arboretum, Carleton College,<br>Northfield, MN"<br>/lat_lon="44.48 N 93.13 W"<br>/altitude="280 m"<br>/collection_date="2018-11"<br>/metagenome_source="insect metagenome"<br>/note="metagenomic"                                                                                                                                                                                                                                                                                                                              |
| gene   | <1..349<br>/locus_tag="wEsol_00991"                                                                                                                                                                                                                                                                                                                                                                                                                                                                                                                                                                                                                                                                                                                                                                                                   |
| CDS    | <1..349<br>/locus_tag="wEsol_00991"<br>/codon_start=1<br>/transl_table=11<br>/pfam="N6_N4_Mtase UPF0020 Methyltransf_26<br>Methyltransf_15"<br>/fullproduct="qcoverage 100 , hcoverage 95.0413223140496<br>, similarity 98.3 , identity 94.8 , evaluate 5.76e-75 ,<br>alnlength 115 , Bacteria , Proteobacteria , MBV2145532.1<br>DNA methylase N-4 [Wolbachia endosymbiont of Pissodes<br>strobi]"<br>/translation="KSGNKREWHGGRNQSDLWFYDKPTHNTLHPTMKPVELMERAIVN<br>SSRPGDIVLDPFSGSGSTLIACERTGRICRTIELDSKFVDVTIKRWQIYTGREAILAS<br>TGKTFSKIQEEKQ"<br>/product="DNA methylase N-4"<br>/besthit="qcoverage 100 , hcoverage 95.0413223140496 ,<br>similarity 98.3 , identity 94.8 , evaluate 5.76e-75 ,<br>alnlength 115 , Bacteria , Proteobacteria , MBV2145532.1<br>DNA methylase N-4 [Wolbachia endosymbiont of Pissodes<br>strobi]" |
| gene   | 474..2420<br>/locus_tag="wEsol_00992"                                                                                                                                                                                                                                                                                                                                                                                                                                                                                                                                                                                                                                                                                                                                                                                                 |
| CDS    | 474..2420<br>/locus_tag="wEsol_00992"<br>/codon_start=1<br>/transl_table=11<br>/pfam="Pfam-B_4795"<br>/fullproduct="qcoverage 99.537037037037 , hcoverage 100 ,<br>similarity 92.4 , identity 89.0 , evaluate 0.0 , alnlength<br>645 , Bacteria , Proteobacteria , WP_187297049.1<br>hypothetical protein [Wolbachia pipientis]"<br>/translation="MYSMNQAKTSAGVVTSTQTSNETSFSEEVENNVSDSTLSVKERIE<br>LFEKGAKQTPIIKEKHKMQTCGSHDLKQCNTHEYKAAFSNVISNGSDGSITLGMDEVGA<br>DQFDALSVLDKGEDTEDEFNAVCEANRIGYNGGYSLDQFEAASNTSSNPKIDNTKEMQ<br>KEEEDKELGDKPKPLPRNGMLEKGNIRNVAPPSRPTAENHRLSIIQDIAPPKPPHSSF<br>QLNGKKCDEQEAIGEPMYETIDQSKRFSKRGLDGEINDQSPETIEKSNSEETSIKKESE<br>DITDEPVDLNTKFLKKSLEGSDSGIDNRSAEVTRSNSQVTEMSEFCGSQGWENMSLNH                                                                                                               |

```

DSPVTLSTSSSEKSDNEETPLIKKEKKTNRILPRVKYAVQQKEFVIFGIAAVALSASA
ALVYLQDKGQFIAFFVNSPLYITMPMIAITSLLAISTIFCGIKQFRDTEECQIGGKNA
NETLNQVLKYQPKDKVIKSVKLEYGNGTHSHFTLNAWKGKNNFINIDDKVISRRNKVE
SVIKDRPLFTALLSSSLVAANIVLPLLLYVEGGISSVQKFYQNALINNVGLSVLVGSSI
LALSMICLGVHYRKTNCTNLVYCEERIEPEKVNGKFIEEIKEARTKVLEENHSDAK
CSSLTLEQVVESHNYKDVIYSIS"
/product="hypothetical protein"
/besthit="qcoverage 99.537037037037 , hcoverage 100 ,
similarity 92.4 , identity 89.0 , evaluate 0.0 , alnlength
645 , Bacteria , Proteobacteria , WP_187297049.1
hypothetical protein [Wolbachia pipientis]"
gene 2589..3071
/locus_tag="wEsol_00993"
CDS 2589..3071
/locus_tag="wEsol_00993"
/codon_start=1
/transl_table=11
/fullproduct="qcoverage 100 , hcoverage 100 , similarity
100 , identity 96.9 , evaluate 1.88e-98 , alnlength 160 ,
Bacteria , Proteobacteria , WP_017532591.1 hypothetical
protein [Wolbachia endosymbiont of Diaphorina citri]"
/translation="MKITQTEWAREIGVSKQYVCYLVKKGIVELEDGLINREQANEAV
AAIRDPSQPLRRKNPENENTSNLSTMLLKTRIKNEMERGKLLLEAKARAEIGELVSVEE
VKTEAFNVARVVRNLLNIPNRVSALLASLSETEKIHMALTEEITNSLEELSNTKFQI
"
/product="hypothetical protein"
/besthit="qcoverage 100 , hcoverage 100 , similarity 100
, identity 96.9 , evaluate 1.88e-98 , alnlength 160 ,
Bacteria , Proteobacteria , WP_017532591.1 hypothetical
protein [Wolbachia endosymbiont of Diaphorina citri]"
gene 3090..4559
/locus_tag="wEsol_00994"
CDS 3090..4559
/locus_tag="wEsol_00994"
/codon_start=1
/transl_table=11
/pfam="Ank_2 Pfam-B_1881 Ank_4 Ank_5 Pfam-B_10896 Ank
Ank_3 Ank_5 Ank_2 Ank_4 Ank_3 Ank Pfam-B_10896 Ank Ank_3
Ank_5 Pfam-B_1714 Ank_5 Ank_2 Pfam-B_11730 Ank_3 Ank
Ank_4 Ank_2 Pfam-B_10896 Ank_5 Ank_4 Ank_5 Pfam-B_1873
Ank Ank_4 Ank_3 Ank_2 Ank_5 Ank Ank_3"
/fullproduct="qcoverage 100.613496932515 , hcoverage 100
, similarity 95.7 , identity 93.1 , evaluate 9.23e-287 ,
alnlength 492 , Bacteria , Proteobacteria ,
WP_182158604.1 ankyrin repeat domain-containing protein
[Wolbachia pipientis]"
/translation="MTDNLSLELIKCLINQPLDVNVRGLNGKTPHCAIEFDELSMV
DLLLTCKKNINPFVEDNEGKTSLDYAKEGKKAIEILQALINNKYGSEEDSLHLAAMIGE
VNAVRYLIRKGDIDVNRNALHHTPLHLAAGIGHANVVKILVEEGKAEIDVFDARNQTP
MHYAVNNKKLEIVKLLKLGLADVNSARMGQNSMKLSPVHIAVSNTNYDERDLCLDILK
CLIKEPNAQVNLQDYENKTPHYAERLKTIEVLLTREDIDPLVKDDSGKTPFDYAKPE
IKKALMNNKYGSEKNSLLHLAAQRGDIELVESILKEEIDIDISNNKGLSPIYLAAEK
HLHVVKLLKKGANYTPVLHSAIKSNLELLKTLFKEKSIKLPDEIGRSVPIYYRCME
HRDAKVRKYNSVICVFTSVSAVAMAAAYIGLTVTAISSAII FATITGIFALIIAVMISE
MSKRYIENEFQKKMFMELEECSSSTVNDVEIEPIMSRCRQ"
/product="ankyrin repeat domain-containing
protein"
/besthit="qcoverage 100.613496932515 , hcoverage 100 ,
similarity 95.7 , identity 93.1 , evaluate 9.23e-287 ,
alnlength 492 , Bacteria , Proteobacteria ,

```

```

WP_182158604.1 ankyrin repeat domain-containing protein
[Wolbachia pipientis]"
gene      4556..6382
          /locus_tag="wEsol_00995"
CDS       4556..6382
          /locus_tag="wEsol_00995"
          /codon_start=1
          /transl_table=11
          /fullproduct="qcoverage 100 , hcoverage 100 , similarity
99.0 , identity 97.5 , evalue 0.0 , alnlength 608 ,
Bacteria , Proteobacteria , WP_010082189.1 phage
terminase large subunit family protein [Wolbachia
endosymbiont of Drosophila simulans]"
          /cog="COG5525 COG5525 611 Phage terminase, large subunit
GpA"
          /pfam="Terminase_GpA DUF3268"
          /product="phage terminase large subunit
family protein"
          /translation="MIYATSFSEGLRPDPELVSEWANEYRVLAATAASEPGKWRT
TER
TPYLKEIMDSLSPSSPAEKVVFMMKGAQIGGTEAGNNWIGYIIDQTPGPMLVVQPTVEM
GKRWSKGRFAPLIESTPCLKSKVKDPRSRDSGNTVQSKEFPGGIVVITGANSSVGLRS
MPVKYLFLEIDAYPGDSGGEGDPVLLSIARTNTFARRKIFLVSTPTIHGISRIEKEF
EATDKRYFFVPCPHCNYYQVLKWAQIKWENNDSRTAHYVCTECSGKIENHQKTEMLER
GEWRATNRVKGEKKGFFHLSSLYSPVGWYSWQQAVEDFLHAKASEQLLKVWINTTLGET
WVDKGEVPDWKQLFNRREFFPVGTVPKGEVVLTAGVDVQKDRLEVEVVAWGKSRESWS
IDYRVFEGDTGGGEVWGKLSELLNHHFIGQNGLEYMISMMAVDAGYATQEVYNWVRGH
QSGSRVMAVKGVNKALVPLSSPSRVDITVGGQKLKRGIKLWPVGVSILKSELFQLLN
V
LKEGEEAPAGYCHFPEYAPEYFKQLTAEQLVSKVVKGYTKQEWQKVRERNEVLDCRIY
ARAASIALGIDRWPESKWNSLGEKPESKKPKKVRQSKWLENV"
          /besthit="qcoverage 100 , hcoverage 100 , similarity 99.0
, identity 97.5 , evalue 0.0 , alnlength 608 , Bacteria ,
Proteobacteria , WP_010082189.1 phage terminase large
subunit family protein [Wolbachia endosymbiont of
Drosophila simulans]"
gene      6375..6590
          /locus_tag="wEsol_00996"
CDS       6375..6590
          /locus_tag="wEsol_00996"
          /codon_start=1
          /transl_table=11
          /pfam="gpW"
          /fullproduct="qcoverage 100 , hcoverage 100 , similarity
97.2 , identity 94.4 , evalue 1.13e-37 , alnlength 71 ,
Bacteria , Proteobacteria , WP_143688767.1 hypothetical
protein [Wolbachia endosymbiont of Laodelphax
striatellus]"
          /translation="MYNEEYLFQVEEAIKKLQSGERVVSIAYGDHVVRYAEVDINDLL
SLRQRIKAELKIAGKRKIVFATNKGII"
          /product="hypothetical protein"
          /besthit="qcoverage 100 , hcoverage 100 , similarity 97.2
, identity 94.4 , evalue 1.13e-37 , alnlength 71 ,
Bacteria , Proteobacteria , WP_143688767.1 hypothetical
protein [Wolbachia endosymbiont of Laodelphax
striatellus]"
gene      6587..6781
          /locus_tag="wEsol_00997"
CDS       6587..6781
          /locus_tag="wEsol_00997"
          /codon_start=1
          /transl_table=11

```

```

/product="hypothetical protein"
/translation="MREYQNFLKQLKYVIVNSGVLEKEGKCKKIVDLSNKVYANAVVD
LSHWNTDVNFKLVKEDGILG"
/besthit="qcoverage 100 , hcoverage 27.0042194092827 ,
similarity 93.8 , identity 93.8 , evaluate 7.11e-33 ,
alnlength 64 , Bacteria , Proteobacteria , WP_019236422.1
glycoside hydrolase family 25 protein [Wolbachia
pipientis]"
gene 6765..7292
/locus_tag="wEsol_00998"
CDS 6765..7292
/locus_tag="wEsol_00998"
/codon_start=1
/transl_table=11
/product="hypothetical protein"
/pfam="Glyco_hydro_25"
/translation="MEYWDKATQGLKFVDLKYAERRKIAEEEEGLLYGAYHFGVRENGK
DQAEHFLETVDSSKVLALLDIEENKNGENITPKQAEDFVTRVQERTNRLPLICGGAY
FLKDFATPILTKCPLWKIRWSKLPKGWNKWVLWQYTNGQMGPKPHSVRGIGPCDRSKF
NGTIEELKNFWLSGC"
/cog="Acm COG3757 269 Lysozyme M1
(1,4-beta-N-acetylmuramidase)"
/besthit="qcoverage 97.1428571428571 , hcoverage
71.7299578059072 , similarity 99.4 , identity 99.4 ,
evaluate 1.59e-125 , alnlength 170 , Bacteria ,
Proteobacteria , WP_019236422.1 glycoside hydrolase
family 25 protein [Wolbachia pipientis]"
gene 7286..8686
/locus_tag="wEsol_00999"
CDS 7286..8686
/locus_tag="wEsol_00999"
/codon_start=1
/transl_table=11
/fullproduct="qcoverage 100 , hcoverage 99.7858672376874
, similarity 96.8 , identity 93.8 , evaluate 0.0 ,
alnlength 466 , Bacteria , Proteobacteria , MBR9984163.1
phage portal protein [Wolbachia endosymbiont of
Homalodisca vitripennis]"
/cog="COG5511 COG5511 492 Bacteriophage capsid protein"
/pfam="Phage_portal_2"
/tigr="TIGR01539 portal_lambda 457 phage portal protein,
lambda family"
/product="phage portal protein"
/translation="MLKTLKQLFSKPKIKSSAWDAAGSGRRVMYWQGETGSINNLLSQ
SLGHLRSRSDMVRKNPYAANIIDTIVSNSIGTGIKPQSKARDGEFRKKVQELWLKWT
DEADSSGVSDFYGLQALVCRSMIEGGECFVRLRTRKLEDRFSVPLQLQVLESEHLDNK
SNQTLANGNIIRSGIEFNRLGQREAYYLFREHPGEGSFGESVRVPANDVLHIYRPLRP
GQIRGEPWLSSILLKLYELDQYDDAELVRKKTAAMFAGFITRLDPEANIMGESESNEQ
GVALSGLEPGTMQLLDPGEDIKFSEPSDVGGSYEAFMRQQLRAIAIGTGITYEQLTGD
LTGVNYSSIRAGLIEFRRCAMLQHNIIVFQFCRPVWSRWLELATLSGELSTTDNQIF
KDVKWIPQGFWDVPLKDQQAQQMAVRNGFKSRAEVVSEMGYDVEEIDQEIAEDQRRR
DYLNLFFDSDVRTQTK"
/besthit="qcoverage 100 , hcoverage 99.7858672376874 ,
similarity 96.8 , identity 93.8 , evaluate 0.0 , alnlength
466 , Bacteria , Proteobacteria , MBR9984163.1 phage
portal protein [Wolbachia endosymbiont of Homalodisca
vitripennis]"
gene 8701..9792
/locus_tag="wEsol_01000"
CDS 8701..9792

```

```

/locus_tag="wEsol_01000"
/codon_start=1
/transl_table=11
/product="hypothetical protein"
/pfam="CLP_protease Peptidase_S49"
/translation="MEILQTNWLCRPMMEQKSFDDLSTLYNGKQPIFKNVKHYVKNNI
EKTAIPIHGIILTKKPGAFDDFLGMTSYEKIQEEVEEALSNKDIETILLDIDSPGGEV
NGVFDLADFIYESRAKKRIVAVANDDAYSAAAYAIASSAEKVFSRTSGVGSIGVIAH
IDQSGFNEKQGIKYTTVFAGGRKNDLNPHEPITSESLESLOKEVDRLYEMFVQLIARN
RNLSTEKIESTEAGLYFGENATEVGLADGIMTYSEFINQYRSYSMNLNTTDKQEQPIQ
DSSELIEKGGCKKCREEVLELIRLCNLSHMPEKLTEFIEQNVSTQEAREILMELLAER
TKKTEILSTIPQNSPEDLMMEAAKARQTA"
/besthit="qcoverage 96.4187327823691 , hcoverage
37.6749192680301 , similarity 98.0 , identity 95.4 ,
evalue 5.51e-222 , alnlength 350 , Eukaryota , Arthropoda
, KAG8290584.1 hypothetical protein J6590_079723
[Homalodisca vitripennis]"
gene 9820..10191
/locus_tag="wEsol_01001"
CDS 9820..10191
/locus_tag="wEsol_01001"
/codon_start=1
/transl_table=11
/pfam="HDPD"
/fullproduct="qcoverage 100 , hcoverage 100 , similarity
96.7 , identity 94.3 , evaluate 3.35e-72 , alnlength 123 ,
Bacteria , Proteobacteria , WP_164224825.1 MULTISPECIES:
head decoration protein [Wolbachia]"
/translation="MTNITEGNNLGDLLKYEVSNNLYSRDQITVAKGQNLKLGAVVAKK
TEDGFIRVLNPTATDGTQTAIGVIASDVNAKENAKGVIIARGAMLADHAVVWPANITE
EQKNAAIKQLETRGIIIRKTV"
/product="head decoration protein"
/besthit="qcoverage 100 , hcoverage 100 , similarity 96.7
, identity 94.3 , evaluate 3.35e-72 , alnlength 123 ,
Bacteria , Proteobacteria , WP_164224825.1 MULTISPECIES:
head decoration protein [Wolbachia]"
gene 10208..11212
/locus_tag="wEsol_01002"
CDS 10208..11212
/locus_tag="wEsol_01002"
/codon_start=1
/transl_table=11
/pfam="Phage_cap_E"
/fullproduct="qcoverage 99.4011976047904 , hcoverage
99.4011976047904 , similarity 98.8 , identity 97.3 ,
evaluate 2.17e-238 , alnlength 332 , Bacteria ,
Proteobacteria , WP_141457112.1 major capsid protein
[Wolbachia endosymbiont of Carposina sasakii]"
/translation="MQNPFSNPAFSMTALTSAINILPINFGRTESLKLFPGKSVRFRH
ITIEEQNGVLSLLPTQVPGAPATVGKRGKRRVRTFTIPHIPHDDVVLPEEVQGIRAFG
SENELVALADVITDHLQTMRNKHAITLEHLRMGALKGIILDADGSELLNLYTEFGITA
KTVNFALGTATTDVKKCMEVLRHIEDNLSGEYMERVHALVSPEFFDALTS HQVKEA
YERWQEGEALRDDMRSGFTFCGITFEEYRGQATDPEGTVRRFIEKDTGHCFLGTAST
FTTYFAPADFNETVNTLGQPLYAKQEPFRFRDGTDLHTQSNPLPMCHRPVAVLKLIVA
"
/product="major capsid protein"
/besthit="qcoverage 99.4011976047904 , hcoverage
99.4011976047904 , similarity 98.8 , identity 97.3 ,
evaluate 2.17e-238 , alnlength 332 , Bacteria ,
Proteobacteria , WP_141457112.1 major capsid protein

```

```

gene      [Wolbachia endosymbiont of Carposina sasakii]"
11262..11615
/locus_tag="wEsol_01003"
CDS       11262..11615
/locus_tag="wEsol_01003"
/codon_start=1
/transl_table=11
/fullproduct="qcoverage 86.3247863247863 , hcoverage
99.0196078431373 , similarity 84.2 , identity 69.3 ,
evaluate 1.06e-44 , alnlength 101 , Bacteria ,
Proteobacteria , WP_168464969.1 hypothetical protein
[Wolbachia endosymbiont of Ctenocephalides felis wCfeT]"
/translation="MDLNCINMKIKDKNLSKLFSDCFEHLGVEVSYCNKSKKEISKIK
ALVKRPDNTYSLGADGALIQQIASIEIRCDVTFNLVGDYIKIGNKYYKIFEQPLQDS
SNELWKVAAVDICLI"
/product="hypothetical protein"
/besthit="qcoverage 86.3247863247863 , hcoverage
99.0196078431373 , similarity 84.2 , identity 69.3 ,
evaluate 1.06e-44 , alnlength 101 , Bacteria ,
Proteobacteria , WP_168464969.1 hypothetical protein
[Wolbachia endosymbiont of Ctenocephalides felis wCfeT]"
gene      11603..12106
/locus_tag="wEsol_01004"
CDS       11603..12106
/locus_tag="wEsol_01004"
/codon_start=1
/transl_table=11
/pfam="Pfam-B_2105 Pfam-B_14565 Pfam-B_12992
Minor_tail_Z"
/fullproduct="qcoverage 100 , hcoverage 98.2352941176471
, similarity 93.4 , identity 85.6 , evaluate 5.97e-90 ,
alnlength 167 , Bacteria , Proteobacteria ,
WP_127463623.1 phage tail protein [Wolbachia endosymbiont
of Bemisia tabaci]"
/translation="MFNIKYNNNFNQNIENYESKVRFAAVRALNKTATWLKAQAAKEI
SEEKRIKLSVIRKRLRIFKAKTSRLDVLIRANLYDIRASTIGKIQKTRRGSKVGKHEF
IGGFAAVMPKGNSGMFKREGRAALPIKEVKLPLEPEASRIIGNLVNYYEVEEVFTKFFE
RDITESV"
/product="phage tail protein"
/besthit="qcoverage 100 , hcoverage 98.2352941176471 ,
similarity 93.4 , identity 85.6 , evaluate 5.97e-90 ,
alnlength 167 , Bacteria , Proteobacteria ,
WP_127463623.1 phage tail protein [Wolbachia endosymbiont
of Bemisia tabaci]"
gene      12103..12576
/locus_tag="wEsol_01005"
CDS       12103..12576
/locus_tag="wEsol_01005"
/codon_start=1
/transl_table=11
/pfam="Pfam-B_4030"
/fullproduct="qcoverage 100 , hcoverage 100 , similarity
98.1 , identity 90.4 , evaluate 9.41e-102 , alnlength 157 ,
Bacteria , Proteobacteria , WP_038251009.1 hypothetical
protein [Wolbachia endosymbiont of Glossina morsitans
morsitans]"
/translation="MNFKDLHNAICTTLKREIPAIQTCEIYPSIRKELLAPALFVELV
SLESGKDPGTEELAMKARFEARIVVDGTVENSSLVVRSLAAEVARVVNKNNTWNVKNVS
PGEFISAEIDGFRPELDAYLVWLVEWSHLHLGKSIWTENKIKPHTITIGENVRE"
/product="hypothetical protein"

```

```

/besthit="qcoverage 100 , hcoverage 100 , similarity 98.1
, identity 90.4 , evalue 9.41e-102 , alnlength 157 ,
Bacteria , Proteobacteria , WP_038251009.1 hypothetical
protein [Wolbachia endosymbiont of Glossina morsitans
morsitans]"
gene 12563..>12854
/locus_tag="wEsol_01006"
CDS 12563..>12854
/locus_tag="wEsol_01006"
/codon_start=1
/transl_table=11
/fullproduct="qcoverage 100 , hcoverage 82.9059829059829
, similarity 96.9 , identity 94.8 , evalue 1.75e-59 ,
alnlength 97 , Bacteria , Proteobacteria , TVS85407.1
phage baseplate assembly protein V, partial [Wolbachia
pipientis]"
/cog="gpV COG4540 184 Phage P2 baseplate assembly protein
gpV"
/pfam="Phage_base_V"
/tigr="TIGR01644 phage_P2_V 192 phage baseplate assembly
protein V"
/product="phage baseplate assembly protein V,
partial"
/translation="MLESNFAISELQRKLANIVRIGLVKEVDYEKAKVRVKIGDIVTD
YLPWITSKAGKDRDWSPPDIDEQVVVFSPLGELSLGVVLGGIYQEKYPAPENK"
/besthit="qcoverage 100 , hcoverage 82.9059829059829 ,
similarity 96.9 , identity 94.8 , evalue 1.75e-59 ,
alnlength 97 , Bacteria , Proteobacteria , TVS85407.1
phage baseplate assembly protein V, partial [Wolbachia
pipientis]"

```

#### ORIGIN

```

1 gaaaagcgggt aataaacgtg agtggcatgg aggaagaaat caaagtgatc tatggtttta
61 tgataagcca acgcacaata cactacaccc aacaatgaag ccagtagaat tgatggagag
121 agcaatagta aacagtagca gaccaggaga catagtactt gatccattta gtggttctgg
181 aagtaacttg attgcatgtg agagaacagg aagaatttgt agaacaatag agctagattc
241 aaagtttgta gatgtaacca taaaacgttg gcaaatatac acaggtaggg aggcaattct
301 agccagtact ggtaaaactt tttcaaagat tcaagaagaa aaacagtaag aaaaaagtgg
361 aagagataac gcaaacagaa atttagtaag cctgagtagt tgtaatatta atttactggt
421 atataccgta ttttaattgag ttttagcgtag taaataactt tggattaaat gttatgtact
481 caatgaatca agcaaagacg tcagctggag tagtaacgtc gcaaacaagt aatgaaacat
541 cgttttctga agaagtagaa aataatgttt cagattctac actatctggt aaggagagaa
601 ttgaattggt tgaaaaaggt gcgaagcaaa cacctattat taaggagaaa catatgaagc
661 aaacttgtag tagtcacgac ctgaagcagt gcaacactga atacaaagca gctttttcaa
721 atgtgattag taatggtagt gatggcagta ttacactagg aatggatgag gtaggtgctg
781 atcaatttga tgcactttca gtgttgata aggggtgaaga tacagaggat gaatttaattg
841 cagtttgtga ggcaaataga ataggatata acgggtgggt ttctcttgat cagtttgagg
901 cggcatccaa cacatcttcc aacccccaaa tagacaacac aaaagaaatg caaaaagagg
961 aagaggataa agaattagga gataaaccaa agccgttacc tagaaatgga atgttggaga
1021 agggcaatat tagaaatgta gctccacctt cgcctagaac agcagaaaaat catcggttga
1081 gtattattca ggatattgca ccaccaaagc caccacattc ttctttccaa ttaaattgaa
1141 aaaaatgtga tgagcaagaa gctataggag aacctatgta tgaaactata gaccaaagta
1201 aaagattctc gaaaagaggt ttagatggtg aaataaatga tcaaagtcca gagatagaaa
1261 agtcaaattc tgaagaaaca tcaattaaga aagaatcaga agatataact gatgaacctg
1321 tagatctgaa tacgaaattt ttaaaaaaga gtttggaagg aagcgatagt gggatagaca
1381 atagaagtgc agaggtgaca agatcaaatt ctcaagtaac agaaatgagt gagttttgtg
1441 gcagtcaagg atgggagaat atgtcattaa atcatgatag tccagttaca ctttcaacta
1501 gctcatcaga aaaaagtgat aatgaagaaa ccccgtaaat taaaaagaa aagaaaacaa
1561 atagaatttt gccaaagagta aaatatgcag tgcagcagaa ggaatttgta attttcggta
1621 tagctgctgt tgcacttagc gtttctgcag ctttggtata tctacaggat aaaggacaat
1681 ttattgcatt ttttgtaaac agccctctct atattactat gccaatgata gcaattactt

```

|      |             |             |             |             |             |            |
|------|-------------|-------------|-------------|-------------|-------------|------------|
| 1741 | cattgcttgc  | aattagcaca  | atattttgtg  | gaataaagca  | atttagagat  | actgaagagt |
| 1801 | gtcaaataagg | aggaaagaat  | gcgaatgaaa  | ctttgaatca  | ggtgctaaag  | tatcaaccaa |
| 1861 | aagataaagt  | aataaaatca  | gtcaaactgg  | aatacggcaa  | tggtactcat  | tcacatttta |
| 1921 | cacttaacgc  | ttggaagggt  | aagaacaact  | tcattaatat  | tgacgacaaa  | gtcattagta |
| 1981 | gaagaaataa  | agtagaatca  | gtaatcaaag  | ataggccatt  | atttacagca  | ttattaagca |
| 2041 | gttttggttgc | tgcaaatata  | gtattgcctt  | tattactgta  | tgtggaagggt | ggtattagta |
| 2101 | gtgtacagaa  | gttttaccag  | aacgctttga  | ttataaacgt  | agggctatca  | gtacttgtag |
| 2161 | gctcgagtat  | acttgcacta  | tcaatgatat  | gccttggagt  | gcattactac  | agaaaaacaa |
| 2221 | attgcacaaa  | tcttgtatat  | tgtgaggaaa  | gaattgaacc  | agaaaaagtt  | aatggaaagt |
| 2281 | tcattgagga  | aataaaggaa  | gcaaggacaa  | aagtgcctga  | agaaaaccac  | agtaaagatg |
| 2341 | ctaaatgcag  | cagttttaacg | ctagagcaag  | tagtggttga  | atctcataac  | tacaaagatg |
| 2401 | taattttatag | tattagttga  | aaatagccaa  | atttcactat  | gtaaaaagaa  | agcaccggag |
| 2461 | tacttcgctt  | tgtgttagta  | aaatatctct  | aaaatatattg | cgagtataaa  | caggtaggga |
| 2521 | attgctgata  | ctggcaaaaac | cttttcagag  | actcaagaag  | aaaactcgt   | aaaaataggc |
| 2581 | aaaaaaaaagt | gaaaatcacg  | caaacagaat  | gggcaagaga  | gataggagta  | tcaaagcaat |
| 2641 | atgtctgtta  | tttagtaaaa  | aaaggaatag  | ttgagttgga  | ggatgggttg  | atcaatagag |
| 2701 | aacaagcaaa  | tgaagcagta  | gcggcaataa  | gagatccaag  | tcagccactg  | aggaggaaaa |
| 2761 | atccagaaaa  | tgaaaataca  | agtaaccttt  | ccacgatgtt  | gctaaaaact  | agaataaaaa |
| 2821 | atgaaatgga  | acgaggtaaa  | cttcttgagg  | caaaagctag  | ggctgagata  | ggagaacttg |
| 2881 | tgtcagtaga  | ggaggtaaaa  | accgaagcat  | ttaatgtagc  | aagagttgtc  | cgtaataatt |
| 2941 | tgcttaatat  | tccaaataga  | gtttcagcgc  | tgcttgcac   | actgagttag  | actgaaaaga |
| 3001 | ttcatatggc  | gctaactgag  | gagattacaa  | actcactcga  | agaattatct  | aacactaaat |
| 3061 | ttcaaataata | aaaagatttt  | gaatataaaa  | tgactgataa  | cttaagttta  | gagttaataa |
| 3121 | agtgtctcat  | taatcaacct  | ggattagatg  | ttaatgtcag  | aggattaaat  | ggaaagacac |
| 3181 | cactacattg  | tgctatagaa  | tttgacgagt  | taagcatggt  | ggatttatta  | ctcacgaaga |
| 3241 | agaacattaa  | tccttttgtt  | gaggacaatg  | aaggcaaaac  | ctccttagat  | tatgccaaag |
| 3301 | aagggaaaaa  | agcagaaata  | ttacaagcgc  | taattaataa  | caaatacgg   | tcagaggaag |
| 3361 | atagcttact  | gcacttagct  | gcaatgatag  | gtgaagttaa  | tgacagttaga | tatttgataa |
| 3421 | gaaaagggtat | tgacgttaat  | gtacgaaatg  | ctctgcatca  | tacgccatta  | catctagcag |
| 3481 | caggcatagg  | acatgcaaat  | gttgtcaaaa  | ttttagtaga  | agaaggaaaa  | gctgaaatag |
| 3541 | atgtcttcga  | tgacagaaat  | cagacaccaa  | tgactatgct  | agttaataac  | aaaaagttgg |
| 3601 | agatagtaaa  | gttactgcta  | aagcttggag  | cagatgtaaa  | tagtgcacgt  | atgggacaaa |
| 3661 | actcaatgaa  | attgtcacct  | gttcatatag  | ctgtaagtaa  | tactaattat  | gatgaaagag |
| 3721 | acttatgtct  | tgatatcctc  | aaatgcttaa  | taaaggagcc  | taatgctcaa  | gtgaatctac |
| 3781 | aagactacga  | aaataaaaacg | ccactacatt  | acgctgaaag  | acttaaaaaca | atagaagttt |
| 3841 | tactgacgcg  | agaagatata  | gaccctctgg  | taaaagacga  | tagcggcaag  | acaccattcg |
| 3901 | attacgctaa  | acctgagata  | aagaaggcct  | tgatgaacaa  | taagtatggt  | tctgagaaga |
| 3961 | atagtctact  | ccatttagct  | gcacaaagag  | gagatattga  | gcttgtagag  | tccattttta |
| 4021 | aagaagaaat  | tgatattgat  | atttcaaaca  | ataaaggctc  | atcaccgatt  | taccttgctg |
| 4081 | cagaaaaagg  | acattttacat | gtagtaaaaat | tactactgaa  | aaaaggagca  | aactatacac |
| 4141 | ctgttctgca  | ctcagcaatt  | aagtcaaata  | atttagaatt  | gctaaaaact  | ttattttaag |
| 4201 | aaaagagtat  | caaattacca  | gatgagatag  | gcagatctgt  | accaatttat  | tatagggtga |
| 4261 | tggagcatag  | agatgcaaaa  | gtaagaaagt  | acaatagtgt  | gatctgtgtt  | tttacctcag |
| 4321 | taagtgcagt  | agcaatggca  | gcatatatag  | gtttaacagt  | aacagcaata  | agcagtgcaa |
| 4381 | tcattttttgc | aacaataaca  | ggaatatattg | cgcttattat  | agcagtaatg  | ataagtgaga |
| 4441 | tgagcaaaaag | atatatagaa  | aatgaatttc  | agaaaaagat  | gtttatggaa  | ttggaggagt |
| 4501 | gtagtctctac | tgttaatgat  | gttgagatag  | aaccaattat  | gagtagatgc  | agacaatgat |
| 4561 | atacgccaca  | tctttttctg  | aaggttttaag | accagaccca  | gagcttaaa   | tatcagaatg |
| 4621 | ggcgaatgag  | tatcgagttt  | tagcagcaac  | tgacagcatc  | gagccaggta  | aatggagaac |
| 4681 | ggaaagaact  | ccttatttta  | aagagatcat  | ggattcactt  | tctccgtctt  | cacctgcaga |
| 4741 | aaaagtagta  | ttcatgaaag  | gagcgcagat  | tgggggaaca  | gaagctggta  | ataactggat |
| 4801 | tggctatat   | atcgatcaaa  | caccaggtcc  | aatgttagtt  | gtgcagccaa  | cagttgaaat |
| 4861 | gggaaaacgt  | tgggtcaaaa  | gaagatttgc  | accactaatt  | gagagtacgc  | catgttttaa |
| 4921 | aagtaaagta  | aaagatccaa  | ggtcaagaga  | ttcaggcaac  | actgtgcaaa  | gtaaagagtt |
| 4981 | tcccggggga  | atagtagtaa  | taaccggagc  | aaatagcagt  | gtaggacttc  | gttccatgcc |
| 5041 | agtaaaaatat | ctcttttctt  | atgagattga  | tgcttatcca  | ggagattcag  | gaggagaagg |
| 5101 | agatccagtt  | ttactcagca  | tagcccgtac  | taatacattt  | gcacggcgaa  | agattttttt |
| 5161 | agtatcgaca  | ccaacaattc  | atggaataag  | cagaattgag  | aaagaatttg  | aagcaacaga |
| 5221 | taagagatat  | ttttttgtac  | catgtccgca  | ttgtaattac  | tatcaagttc  | taaaatgggc |
| 5281 | acaaataaaa  | tgggaaaata  | atgactcaag  | aacagcacat  | tatgtctgca  | ctgaatgtag |

|      |             |             |             |             |             |             |
|------|-------------|-------------|-------------|-------------|-------------|-------------|
| 5341 | cggcaaaata  | gaaaatcatc  | aaaagacaga  | gatgcttgaa  | cgtggagaat  | ggagagctac  |
| 5401 | taatagagta  | aaaggtgaga  | aaaaaggatt  | tcattctttca | agtcctttata | gtccagtagg  |
| 5461 | ctggtatagt  | tggcaacaag  | cagtagagga  | ctttctccat  | gcaaaggaaa  | gtgaacaatt  |
| 5521 | actaaaagtt  | tggataaata  | ccacgcttgg  | agaaacttgg  | gtagataaag  | gagaagtacc  |
| 5581 | ggactggaag  | caactattta  | acagaagaga  | atTTTTtccc  | gtaggcacag  | taccaaagg   |
| 5641 | cgaagtggta  | ctcacagcag  | gtgttgatgt  | acaaaaagat  | cgttttagaag | tagaagtgtg  |
| 5701 | agcatgggga  | aaaagccgcg  | aaagttggtc  | aatagactac  | cgagtatttg  | aaggagatac  |
| 5761 | tgggggtgga  | gaagtatggg  | gaaaactctc  | tgagctctta  | aatcatcatt  | ttatcgggtca |
| 5821 | aaatggtctt  | gaatacatga  | taagcatgat  | ggcagttgat  | gcaggttatg  | caacgcagga  |
| 5881 | agtatacaat  | tgggtaagag  | gtcatcaggg  | gtctggaaga  | gtgatggcag  | tcaaaggtgt  |
| 5941 | aaataaagcg  | ctagtgccac  | ttagtagccc  | aagtagagtt  | gatataacag  | ttggcgggca  |
| 6001 | aaagctgaaa  | agaggaataa  | agctatggcc  | agtaggagta  | tcgatattaa  | aatcagagct  |
| 6061 | ttttcaatta  | cttaatgttt  | taaaagaagg  | tgaagaagct  | ccagcaggat  | actgtcattt  |
| 6121 | tccggagtat  | gcacctgaat  | attttaagca  | gctaacggca  | gagcaattag  | tcagcaaagt  |
| 6181 | agtaaaaggt  | tataccaaac  | aagagtggca  | aaaggtaaga  | gaaagaaacg  | aagtactaga  |
| 6241 | ttgccggatt  | tatgcgagag  | cagcatctat  | tgcacttgga  | atcgatcggt  | ggccagagag  |
| 6301 | taaatggaat  | agtttaggtg  | aaaaaccaga  | aagcaaaaaa  | cctaaaaaag  | taagacagag  |
| 6361 | taagtggttg  | gagaatgtat  | aacgaagagt  | atttgtttca  | agtcgaagaa  | gcgataaaga  |
| 6421 | agcttcagag  | tggcgaaaga  | gtggtatcaa  | ttgcatatgg  | tgaccatggt  | gtaagatatg  |
| 6481 | ctgaagtaga  | tataaatgat  | ttactaagct  | taagacaacg  | aattaaagct  | gagctaaaga  |
| 6541 | ttgctggaaa  | gaggaaaatt  | gtttttgcta  | ctaataaggg  | aattatatga  | gagaatatca  |
| 6601 | aaatTTTTctg | aaacaattaa  | agtatgtaat  | agtcaatagt  | ggtgtattag  | aaaaagaagg  |
| 6661 | taaatgtaag  | aaaatagttg  | atttatcaaa  | taaagtatat  | gcgaatgcag  | tagtagacct  |
| 6721 | atcacattgg  | aatacagatg  | taaatTTTTaa | gctagtcaaa  | gaagatggaa  | tactgggata  |
| 6781 | aggcaactca  | aggattaaaa  | tttgtagatc  | taaagtacgc  | agagagaaga  | aaaattgctg  |
| 6841 | aagaagaagg  | acttctgtat  | ggtgcatacc  | atTTtgaggt  | aagagaaaac  | ggaaaagacc  |
| 6901 | aagctgagca  | TTTTtttagag | acagtaggcg  | atagttctaa  | agttctactt  | gctctagata  |
| 6961 | tagaagaaaa  | caaaaatgga  | gaaaacataa  | caccaaaca   | ggcgggaagat | tttgttacta  |
| 7021 | gagttcaaga  | aagaactaat  | cgcttaccat  | taatttgcg   | aggagcttat  | tttctaaaag  |
| 7081 | atTTtgctac  | accaatttta  | actaagtgtc  | cactgtggaa  | aataagatgg  | tctaaactac  |
| 7141 | caaaaggatg  | gaataagtgg  | gttttTgtggc | aatacactaa  | tgggtcaaag  | ggacctaaac  |
| 7201 | cgcattcagt  | aagaggaata  | ggaccatgtg  | atagaagtaa  | atttaaatgga | acaatagaag  |
| 7261 | aattaaagaa  | TTTTtggtta  | tcaggatggt  | aaagacctta  | aaacaactat  | ttagtaagcc  |
| 7321 | aaaaatcaaa  | agttctgcat  | gggatgcagc  | aggctcagga  | aggagagtga  | tgtattggca  |
| 7381 | aggagaaaca  | ggaagcataa  | ataatTTtact | ttctcagagc  | cttggggcact | tacgtagccg  |
| 7441 | ctctcgtgat  | atggtaagaa  | aaaatccgta  | tgcagcaaat  | atcattgaca  | caatagtaag  |
| 7501 | taactctatt  | ggaacaggaa  | taaaaccaca  | atcaaaaagca | agagatggag  | aatttcgaaa  |
| 7561 | gaaagtgcaa  | gaattatggc  | taaaatggac  | agatgaagca  | gacagcagcg  | gagtaagtga  |
| 7621 | TTTTtatgga  | ttacaagctc  | tagtatgtag  | aagtatgata  | gagggaggag  | aatgttttgt  |
| 7681 | acgactccga  | acaagaaaagc | tgggaagatag | atTTtctgta  | ccattgcaac  | ttcaagtatt  |
| 7741 | ggaatcagag  | catttagata  | acaaaagcaa  | tcagactctt  | gcgaacggca  | atattattcg  |
| 7801 | tagtgggtatt | gaatttaacc  | gacttgggtca | aagagaagct  | tattacctat  | ttagggagca  |
| 7861 | cccaggtgaa  | ggttcgtttg  | gagaatcagt  | tagagtacca  | gcaaattgatg | ttttacatat  |
| 7921 | ttatagacca  | ctaagacctg  | ggcaaattag  | aggagaacca  | tggcttttcga | gtatacttct  |
| 7981 | gaaactttat  | gagcttgatc  | aatacagatga | tgcagaatta  | gtaagaaaaa  | agacagcagc  |
| 8041 | aatgttttgct | ggatttatta  | cgagactcga  | tccagaagca  | aatatcatgg  | gagaaaagtga |
| 8101 | aagtaatgag  | caaggagtag  | cactatctgg  | cctagaacct  | ggaacaatgc  | agcttttaga  |
| 8161 | cccaggagag  | gacataaaat  | tttcagagcc  | atcagatggt  | ggaggaagtt  | atgaagcatt  |
| 8221 | catgagacag  | caactgaggg  | caatagcaat  | aggtacaggg  | ataacatatg  | agcagctaac  |
| 8281 | aggagattta  | accggtgtta  | attactcatc  | aatcagagct  | ggattaatatg | agtttcgtcg  |
| 8341 | tcgatgcgct  | atgctgcaac  | acaacattat  | agtattttcag | ttttgcaggc  | cagtatggag  |
| 8401 | tagatggcta  | gaacttgcca  | ctttatctgg  | agagctttct  | acaacagata  | atcaaatatt  |
| 8461 | taaagatgta  | aaatggatac  | cacagggatt  | tgattgggta  | gatcctttta  | aagaccagca  |
| 8521 | agcacaacag  | atggcagtaa  | ggaatggatt  | taagagtcga  | gcagaagtag  | tatcagaaat  |
| 8581 | gggttacgat  | gtagaagaaa  | ttgaccaaga  | aatagcagaa  | gatcaaaggc  | gagctgatta  |
| 8641 | tctcaacctt  | ttcttttgatt | ctgatgtcag  | gacacaaaaca | aaataaatct  | cgttttacttt |
| 8701 | atggaaatTTt | tacaaaccaa  | ctggctatgt  | aggccgatga  | tgatagagca  | aaaaagcttt  |
| 8761 | gacctgtttgt | cactatataa  | cggaaaacaa  | cctatcttta  | aaaacgtaaa  | acactatgta  |
| 8821 | aagaacaata  | tagaaaagac  | agcaataata  | ccaatacatg  | gaatTTttaac | caaaaaacca  |
| 8881 | ggagcttttg  | atgatttttct | aggcatgaca  | tcgtatgaga  | aaattcaaga  | agaagtagaa  |

|       |             |             |             |             |            |             |
|-------|-------------|-------------|-------------|-------------|------------|-------------|
| 8941  | gaagcattat  | caaacaaaga  | tatagaaact  | attctgcttg  | atatagatag | cccaggagga  |
| 9001  | gaagtaaacy  | gtgtatttga  | tttagctgat  | tttatTTacg  | aatcaagagc | aaaaaagaga  |
| 9061  | attgtggcag  | tagcaaata   | tgatgcgtac  | tctgctgcat  | atgcaattgc | ctctagcgct  |
| 9121  | gaaaagggtt  | ttgtaagtag  | aacctctggt  | gttggcagta  | ttggagtaat | agcaagtcac  |
| 9181  | atagatcaaa  | gtgggtttta  | tgaaaaacag  | ggaataaaat  | atacgacagt | atTTgcagga  |
| 9241  | ggtagaaaaa  | atgattttaa  | cccacatgaa  | ccaataactt  | ctgaaagtTT | agaaagctta  |
| 9301  | caaaaagaag  | tagaccgact  | atatgagatg  | tttgttcaac  | tcatagcaag | aaataggaat  |
| 9361  | ctatcgacag  | aaaaaatcga  | atcaacagaa  | gcagggttat  | atTTtgga   | aaatgcaaca  |
| 9421  | gaagtagggc  | ttgccgatgg  | aattatgaca  | tattctgaat  | ttatcaatca | atataggagt  |
| 9481  | tacagtatga  | atTTaaacac  | aacagataaa  | caagaacagc  | caattcaaga | ctcaagtga   |
| 9541  | ttaattgaaa  | aaggTgggtg  | caagaagtgt  | cgagaagaag  | TTTTggaatt | gatacgttta  |
| 9601  | tgtaatctgt  | cgcataatgcc | agagaagtta  | acggagtTTa  | ttgaacaaaa | tgtgagcact  |
| 9661  | caagaagcga  | gagagataat  | aatggagtta  | ctagcagagc  | gaacgaaaaa | gacagagata  |
| 9721  | ctgagtacaa  | taccacagaa  | ttcaccggaa  | gacttgatga  | tggaagcagc | taaagctcgt  |
| 9781  | caaactgcat  | aagtaagaaa  | TTTTaaagga  | gaaacattta  | tgacaaatat | aactgaagga  |
| 9841  | aataatTTtag | gagatcttct  | gaaatatgaa  | gtgtccaatc  | tatattcacg | agatcaaata  |
| 9901  | actgttgcca  | aaggacagaa  | tctcaagctt  | ggtgcagtag  | ttgctaaaaa | gactgaagat  |
| 9961  | ggttttatta  | gggtctttaa  | tccaacagca  | accgatggca  | cacaaaccgc | aataggTgtt  |
| 10021 | attgcaagtg  | atgtaaacgc  | aaaagaaaat  | gctaaaggag  | taattattgc | tcgcggtgca  |
| 10081 | atgctagcag  | atcatgcagt  | tgtatggcca  | gcaaatataa  | ctgaagagca | gaaaaatgca  |
| 10141 | gcaataaaac  | aactagaaac  | acgtggaatt  | atcattcgca  | aaacagtcta | atTTaggag   |
| 10201 | aaattcaatg  | caaaatccat  | tttcaaattc  | agcattcagt  | atgacagctt | taactagtgc  |
| 10261 | tattaacata  | ttgccgatta  | atTTtggtag  | aactgaaagt  | ttaaaattat | ttccaggcaa  |
| 10321 | atcagtaagg  | tttcgtcata  | ttactataga  | agaacaaaac  | ggtgtattaa | gtttactacc  |
| 10381 | aacacaagtt  | ccaggagcac  | cagccactgt  | aggaaaaaga  | ggaaaaagaa | gagtaagaac  |
| 10441 | gtttacaata  | ccacataattc | cacatgatga  | tgtagtTcta  | cctgaagaag | ttcaaggaat  |
| 10501 | ccgtgctttt  | ggctcagaaa  | acgaacttgt  | agcgcttgct  | gacgttatca | ctgatcactt  |
| 10561 | gcaaacaatg  | agaaacaaac  | atgcaataac  | gttagaacat  | ctgcgtatgg | gagcactaaa  |
| 10621 | gggaataatt  | ttagatgcag  | atggatctga  | attacttaac  | ctgtacacag | agtttggaat  |
| 10681 | tacagcaaaa  | acagtaaact  | ttgctcttgg  | cacagcaaca  | acggatgtaa | aacgaaagtg  |
| 10741 | tatggaggta  | ctaaggcata  | ttgaagataa  | tttaagcggc  | gagtatatgg | aaagagtgca  |
| 10801 | tgcgctagta  | agtcctgagt  | TTTTtgatgc  | tttaacctct  | caccaaaaag | taaaggaagc  |
| 10861 | atatgaaaga  | tggcaagagg  | gagaagcact  | tagagacgat  | atgagatcag | gatttacgtt  |
| 10921 | ttgtggcatc  | acatttgagg  | aatatagagg  | gcaagcaact  | gaccctgaag | gaaccgtgag  |
| 10981 | aagattttatt | gagaaagata  | cagggcactg  | TTTTccacta  | ggaacagcaa | gcacatttac  |
| 11041 | aacatatttt  | gcaccagcag  | atTTtaatga  | gacagtaaat  | actcttggac | agccactata  |
| 11101 | tgcaaaaaca  | gagccaagaa  | gatttgatcg  | aggaaactgac | ctccatactc | aatcgaaccc  |
| 11161 | cctacctatg  | tgccacagac  | ctgcggtggt  | ggtaaaaacta | atcgtagcat | aagccacata  |
| 11221 | aggctaattct | agtagaaata  | tatgtggcag  | gctagaaaaga | tatggactta | aattgtatta  |
| 11281 | atatgaaaat  | aaaagacaag  | aatttatcaa  | aattatTTtc  | agattgtttt | gaacatttag  |
| 11341 | gtgtagaagt  | aagctactgc  | aataaaaagta | agaaggaaat  | ctcaaaaata | aaagcgttag  |
| 11401 | ttaagcgtcc  | tgacaatacg  | tattctctag  | gtgcagatgg  | agcattaatt | cagcaaactcg |
| 11461 | cctctataga  | aatacgttgc  | cgggacgtta  | ctttcctcaa  | tgtaggagac | tatatcaaga  |
| 11521 | ttggtaataa  | atactacaaa  | atTTttgaac  | aaccacttca  | agattcctct | aatgaattgt  |
| 11581 | ggaaagttgc  | agcagtagat  | atatgtTTta  | tataaaaatac | aataacaatt | ttaatcaaaa  |
| 11641 | catagaaaac  | tacgagtcaa  | aagtgaggtt  | tgcagctgta  | agagcactaa | acaaaactgc  |
| 11701 | tacttggtta  | aaagcgcaag  | cagctaagga  | aatcagtgag  | gaaaagagaa | taaaactaag  |
| 11761 | tgtgataaga  | aagagattaa  | gaatttttaa  | ggcgaaaact  | agcagactag | acgtgttaat  |
| 11821 | tagagcaaat  | ctctatgaca  | ttagagcatc  | gacaattggc  | aaaatacaaa | aaacaagaag  |
| 11881 | aggatcgaaa  | gtaggaaaagc | atgagtttat  | aggaggattt  | gcagcagtta | tgccaaaagg  |
| 11941 | aaatagcggt  | atgtTTtaaac | gtgaagggaag | ggcagcattg  | ccaataaagg | aagttaagtt  |
| 12001 | gccactagaa  | cctgaggctt  | caaggataat  | aggaaatctt  | gttaattatg | aggttgagga  |
| 12061 | agtattttaca | aaattttttg  | aacgtgatat  | tacagaaaagt | gtatgaattt | caaagatttg  |
| 12121 | cataacgcaa  | tctgcactac  | gctgaaaaga  | gaaataccag  | caattcaaac | ttgtgaaatt  |
| 12181 | tatccatcga  | taagaaaaga  | attattagcg  | ccagcgttat  | ttgtagagct | tgtgagttta  |
| 12241 | gaatctggaa  | aagatcctgg  | aacagaagaa  | ttggccatga  | aagcaagatt | tgaggcgcgga |
| 12301 | attgtagttg  | atggaacagt  | cgagaattcc  | tcgttagttg  | taaggTcatt | agcagcagaa  |
| 12361 | gttgcaagag  | tagtaaaataa | aaatacttgg  | aacgtgaaaa  | atgtttcgcc | aggagaattt  |
| 12421 | atctctgcag  | aaattgacgg  | atTTtagacc  | gaattagatg  | cgtatTTggt | gtggttggtt  |
| 12481 | gagtggagtc  | atcagcttca  | tttaggtaaa  | tcgatatgga  | cagaaaataa | gattaagcca  |

```

12541 catacgatta caataggaga aaatggttaga gagtaatttt gctattttcag agctgcaaag
12601 aaaatttagca aacattgtac gaatagggct tgtaaaagaa gtagattatg aaaaagcaaa
12661 agtaagagtg aaaataggag atatcgtaac agactatctg ccgtggataa caagtaaagc
12721 aggaaaagat agagattggt ctccgccaga tattgatgaa caagttgtgg tattttctcc
12781 tcttggtgaa ctatcattag gagtgggtatt aggaggaata tatcaggaaa aataccctgc
12841 accagagaat aaaa

```

//

```

LOCUS      JAQZAU010000090      14214 bp      dna      linear      ENV 17-MAR-2023
DEFINITION MAG: Wolbachia pipientis isolate wEsol contig_45739, whole genome
            shotgun sequence.
ACCESSION  JAQZAU010000090  JAQZAU010000000
VERSION    JAQZAU010000090.1
DBLINK     BioProject: PRJNA929258
            BioSample: SAMN33142973
KEYWORDS   WGS; ENV; Metagenome Assembled Genome; MAG.
SOURCE     Wolbachia pipientis (insect metagenome)
ORGANISM   Wolbachia pipientis
            Bacteria; Pseudomonadota; Alphaproteobacteria; Rickettsiales;
            Anaplasmataceae; Wolbachieae; Wolbachia.
REFERENCE  1  (bases 1 to 14214)
AUTHORS    Fiutek,N., Couger,B.M., Roy,S., de la Torre,J.R. and Connor,E.F.
TITLE      Genomic assessment of the contribution of the Wolbachia
            endosymbiont of Eurosta solidaginis to gall-induction
JOURNAL    International Journal Molecular Sciences
REFERENCE  2  (bases 1 to 14214)
AUTHORS    Fiutek,N., Couger,B.M., Roy,S., de la Torre,J.R. and Connor,E.F.
TITLE      Direct Submission
JOURNAL    Submitted (10-FEB-2023) Biology, San Francisco State University,
            1600 Holloway Ave, San Francisco, CA 94132, USA
COMMENT    ##Genome-Assembly-Data-START##
            Assembly Date      :: JUN-2019
            Assembly Method    :: FLYE v. 06-2019
            Genome Representation :: Full
            Expected Final Version :: Yes
            Genome Coverage     :: 100.0x
            Sequencing Technology :: Illumina HiSeq; PacBio Sequel
            ##Genome-Assembly-Data-END##
FEATURES   Location/Qualifiers
            source              1..14214
                                /organism="Wolbachia pipientis"
                                /mol_type="genomic DNA"
                                /submitter_seqid="contig_45739"
                                /isolate="wEsol"
                                /isolation_source="galls on Solidago altissima"
                                /host="Eurosta solidaginis MN-2018-EFC"
                                /db_xref="taxon:955"
                                /environmental_sample
                                /country="USA: Cowling Arboretum, Carleton College,
                                Northfield, MN"
                                /lat_lon="44.48 N 93.13 W"
                                /altitude="280 m"
                                /collection_date="2018-11"
                                /metagenome_source="insect metagenome"
                                /note="metagenomic"
            gene                complement(<1..965)
                                /locus_tag="wEsol_01007"
            CDS                 complement(<1..965)
                                /locus_tag="wEsol_01007"
                                /codon_start=1
                                /transl_table=11

```

```

/product="hypothetical protein"
/pfam="DnaJ DUF4248 Ank_2 Ank_5 Ank Ank_3 Ank_4 Ank Ank"
/translation="MPVSEEINFENFKHSFKVDVDYYKILKVGVDÄKQDDIKKAYRKL
ALEYYPDRNCDNEEAKKKFQQLMKAHEVLVDPEQRKKYDEGRKSRIHNEHSETPRAGN
KKDIASRLFKAFLYRNLQEAELIKKVKNLHITCPDDSKHVLYNLIVNACMFKDWFKF
FEDILSKRDGKIDLNIDICPEGTALSVACMFSNIDVAKLLRLRYGADVKNKVIENNGSP
IYYALEHNNHNLASFLFQRGAKIDVTPELEQAI IANSYSEKSQYTRKTMEVLLRHTSP
EQNTEMLKRFSNNVTLRNEDIEIVKLLLNKGADPYLGNLNAVALA"
/besthit="qcoverage 100 , hcoverage 49.4607087827427 ,
similarity 93.5 , identity 86.3 , evalue 3.13e-187 ,
alnlength 321 , Bacteria , Proteobacteria , QTP63005.1
ankyrin repeat domain-containing protein [Wolbachia
endosymbiont of Ceratosolen solmsi]"
gene 1702..2664
/locus_tag="wEsol_01008"
CDS 1702..2664
/locus_tag="wEsol_01008"
/codon_start=1
/transl_table=11
/pfam="Ank_2 Ank_5 Pfam-B_1714 Ank_4 Ank_3 Ank Ank_2 Ank
Ank_3 Ank_4 Ank_2 Ank_5 Ank Ank_3 Ank_4 Ank_5 Ank_2 Ank
Ank_3 Pfam-B_1714 Ank_4 Ank_5 Ank_2 Ank Ank_3 Ank_4 Ank_2
Ank_3"
/fullproduct="qcoverage 110.3125 , hcoverage 100 ,
similarity 90.7 , identity 90.7 , evalue 1.13e-107 ,
alnlength 353 , Bacteria , Proteobacteria ,
WP_151808102.1 MULTISPECIES: ankyrin repeat
domain-containing protein [unclassified Wolbachia]"
/translation="MNEIQQRELNEQLFNAVQGNIGQIEELIVAGAEVNAVDEGEKA
FSRLSALSNTRERGVVEAANIQQRLRLTPLHYAVLSGREMVELLIEKGANINMVSEDP
TLLHYAAAFSDKREVVELLIKEGANVDAVDDNGNTPLFSAALSGKREMVLLIEKRAN
INAVNESKNTPLHAATLSGKREVVELLIGEGA HIDAIDNGNTPLSWAAEHSQKGVIE
SLLEKGANIDVIDGDGNTPLNCV IISNKIDNAELIVNHI AKLEATGLYVSPENIQ LKA
QIMPEIEKRIFLHNHKPLIDALSTHYGSN FQAMTFTGIKNRSTK"
/product="ankyrin repeat
domain-containing protein"
/besthit="qcoverage 110.3125 , hcoverage 100 , similarity
90.7 , identity 90.7 , evalue 1.13e-107 , alnlength 353 ,
Bacteria , Proteobacteria , WP_151808102.1 MULTISPECIES:
ankyrin repeat domain-containing protein [unclassified
Wolbachia]"
gene 3191..4693
/locus_tag="wEsol_01009"
CDS 3191..4693
/locus_tag="wEsol_01009"
/codon_start=1
/transl_table=11
/pfam="Ank_2 Pfam-B_14646 Ank_5 Pfam-B_2980 Pfam-B_1714
Ank Ank_3 Ank_4 Ank_2 Ank_5 Ank Ank_3 Ank_4 Ank_5 Ank
Ank_3 Ank_2 Ank_4 Ank_5 Ank Ank_3 Ank_4 Ank_5 Ank Ank_3
Pfam-B_1714 Ank_2 Ank_5 Ank Ank_3 Ank_4"
/fullproduct="qcoverage 100 , hcoverage 100 , similarity
96.8 , identity 96.8 , evalue 1.21e-204 , alnlength 500 ,
Bacteria , Proteobacteria , WP_155968690.1 ankyrin repeat
domain-containing protein [Wolbachia pipientis]"
/translation="MIDFMKNEFEIILQGIEENPSIYSNNTTTRIANELQEYNSRRSS
EINESSES IHHKMQLLDENYNRETQLLSENYGRKIQSLNYQYNSKLLQELHNNANSSK
SNYDSRHAIPDYDWEYERYNNSLKDSEAKFNMEFKKYENELRELEQERC SIKHIMHEC
NQWKKHGF DINYIFKVQDDSNHTKEYTLLHFAANFGDINVT KLLLEGGAGVDIKDQNG
NTSLHLSASNGYIDIVELLVKEGSDPNVNVNKGNTSLHLAAANGHIDI ELLVKEGSD

```

```

LNVVNKGNTSLHLAAANGHIDIIELLVKKGSDLNVVNKGNTPLHSAFYNNCTKVVK
YLIGKEPSMKEVVEHLVRCVVEDRAHTLLKGRTPLHLAAIYDCTEVAESLLKKWENPL
LKDTNGKTPRELATDESLIQLFGEAEIKQQEYNATKWGLVSGGSTAVLGIAATTIFAT
VFTIGFLPIVGAVAAATTALAVGGTTYMILKPSAKIERIECEETYICRT"
/product="ankyrin repeat domain-containing
protein"
/besthit="qcoverage 100 , hcoverage 100 , similarity 96.8
, identity 96.8 , evaluate 1.21e-204 , alnlength 500 ,
Bacteria , Proteobacteria , WP_155968690.1 ankyrin repeat
domain-containing protein [Wolbachia pipientis]"
gene complement(4905..5129)
/locus_tag="wEsol_01010"
CDS complement(4905..5129)
/locus_tag="wEsol_01010"
/codon_start=1
/transl_table=11
/product="hypothetical protein"
/translation="MHQVKIVSKFKEVKVGNLFFSTCSNVSKSICVELGKVEGGSYNL
VVYNINKFKRCNHFQQPKPASVRTIFFWNG"
/besthit="qcoverage 55.4054054054054 , hcoverage 100 ,
similarity 97.6 , identity 95.1 , evaluate 1.47e-18 ,
alnlength 41 , Bacteria , Proteobacteria , CQD10804.1
Uncharacterised protein [Wolbachia endosymbiont wPip_Mol
of Culex molestus]"
gene complement(5168..8611)
/locus_tag="wEsol_01011"
CDS complement(5168..8611)
/locus_tag="wEsol_01011"
/codon_start=1
/transl_table=11
/fullproduct="qcoverage 100 , hcoverage 100 , similarity
100 , identity 100 , evaluate 0.0 , alnlength 1147 ,
Bacteria , Proteobacteria , WP_015588932.1 cytoplasmic
incompatibility factor CifB [Wolbachia endosymbiont of
Drosophila sechellia]"
/translation="MSNGDGLIRSLVDGDLEGFRQGFESFLDQCPSFLYHVSAGRFLP
VFFFSMFATAHDADILDANERVYFRFDNHGIDTGGRNRNTGNLKVAVLTRSRDQGRVV
KCYSISDRPNSDGLRFSTERNALIQKIIQQNPDLREGDLDFEQYKVCMHGKGSQGE
AIATVFEVIREKDFRGRDKFAKYSASEISLLRQLLDHRLTIQEIKGRQLNQNLRLQ
DRSVNFAQVAQQQRIIDNFMEILANNQRQNVERRMHREVLPIYITDIYDNCRQALENNI
ENRNQKFESHGFLGFLANFSHRYTIGIDLDSLPRNSHVAFLIHHQAERENIPIVINL
AIFDTPSDVALNCAIGYAGRLHNSSFIPIHTEsrNTVCVGLNFNLNRIpFRVDTVGLQ
QGRFPLVQQLFEYIEDEEVGENIRDfLLQHLpGEIPRNAENYNRIpDCITGFaFGSSA
FDREYLELEEGEDRVRVRKYIFRYGDGDLRRHTLTmVSyaQGYNIVTLHIRAYDAQQQ
EAIDLQALNVNRNNVHVWEVSCTLNQFELDIDQPNDLGLYHDYQNNNANNFLDGDLV
QVPNAENVHGISERVmNDGWKNVGQHRELFQEISGALMPLRDainVNSedKFRSILHG
TFYASDNpYKVLAMYKVGQTYSLKRGQEEEGERAILTRITEQRLDLLLLRQPTADTHP
IGYILRFAGNAEEIIQKENNAKDQIKELINKQRGYVPITSGNEVVLLPLIFNAGAERV
EGLISIPEGIGREEYVHRLDRGGRDSRPGVLVGpESVIDENpPEGLLSdQTREnFRRF
YTERKPGQNSIFLLDIDDNLHVPFSYLQGTraqVIETLKSRIrrGDNSIPTAQEIrrQ
IRDILRNQgIEVNDLLTLEFATRNGHYDyWLQQIDIAHAGRLRYQLRTEGNHTFEVAN
LARNDGNEHIVRVLNQFRENEKQQRlTLIITLNNthWVTLVIERQNGNYVGYYADSTA
TAVPGGITDIIQNNLGNnIRINNVSVSQQTDGWNcGLWALENASDINrVLNENpVGQV
QNIINIIRDfLGRGHPNRDRNYFQNIrVGISQLFRNDPGFQSVQLQAYIQNREQIDPL
LRTYLELGYHRVGgGCGPVEAPISLSVSDSSnFGGLPQSSLEGPEASrVSDLSKKGKG
R"
/product="cytoplasmic incompatibility
factor CifB"
/besthit="qcoverage 100 , hcoverage 100 , similarity 100
, identity 100 , evaluate 0.0 , alnlength 1147 , Bacteria ,

```

Proteobacteria , WP\_015588932.1 cytoplasmic incompatibility factor CifB [Wolbachia endosymbiont of *Drosophila sechellia*]"

gene complement(8665..10128)  
/locus\_tag="wEsol\_01012"

CDS complement(8665..10128)  
/locus\_tag="wEsol\_01012"  
/codon\_start=1  
/transl\_table=11  
/fullproduct="qcoverage 100.82135523614 , hcoverage 100 , similarity 91.0 , identity 85.5 , evalue 4.79e-309 , alnlength 491 , Bacteria , Proteobacteria , WP\_197907389.1 cytoplasmic incompatibility factor CifA [Wolbachia endosymbiont of *Kradibia gibbosae*]"  
/translation="MPIETKRQAEVLKKLQDVIKHTDRDIAAGRKLAIKRWVETYIEY IKLKFDDKLEFLYNVFRDEGCWLGTRLNNTVLGQKLTEEKIGEIDNPLPRYGMASRYC ITGKIGDFFNKQFVLSRGQFTSEEVD SQGNPISDQYVRNILLSSMKRNGPVDFWIDR ESGELKKYDAVEGFDSAVKLRWSEGVEYFYNHLKEEDKEKKLTEAIIALSSPQSVEKD APILDFCVRNIADKDTLLQKLSQKDKGIYSLFAELIESCFFD TVHDLVQCWCYEEASA RGDHSKEILSQDEYDLLLYSLSNVMLKNPESNVQARSLIMKIWKDCDFIEYRKISVNI SNCIVPIQDMLAGLIINWKREDIYKSDEEKEVEKKEILDVILFAKDCFPKEFEFFKEK IIKNLRLCGREGMKDYVDYGLFAEELFSELEKTTLPVGPVGDGPWNNLRSRKAHGSK ETTLPVDDGPQSELGTPSVSGVSSYKKKSVFTLSGNK"  
/product="cytoplasmic incompatibility factor CifA"  
/besthit="qcoverage 100.82135523614 , hcoverage 100 , similarity 91.0 , identity 85.5 , evalue 4.79e-309 , alnlength 491 , Bacteria , Proteobacteria , WP\_197907389.1 cytoplasmic incompatibility factor CifA [Wolbachia endosymbiont of *Kradibia gibbosae*]"

gene 10371..10967  
/locus\_tag="wEsol\_01013"

CDS 10371..10967  
/locus\_tag="wEsol\_01013"  
/codon\_start=1  
/transl\_table=11  
/product="hypothetical protein"  
/pfam="Cas\_NE0113 Oxysterol\_BP"  
/translation="MLFSRRILVRLIGEVLMTLTKCVLTSPLSSVQQYLLVLGKVMV NTKSDQQRAEDDLTYVLRFEKEKGFERRIRELLVNDYKKLKKPLSKLLGKLESKIRTD KENNQAARNVYDQIKKSKTNEDKLSNLLNFKKQLKAFLKNQDDCSIVLNAIDSASVIP VIEVNGVHPKDSEIKKLKKAQPLTSHLSPLTDKTLKKL"  
/besthit="qcoverage 93.9393939393939 , hcoverage 47.2081218274112 , similarity 100 , identity 99.5 , evalue 4.55e-113 , alnlength 186 , Bacteria , Proteobacteria , QEF50244.1 hypothetical protein EA652\_0547 [Wolbachia endosymbiont of *Drosophila ananassae*]"

gene 11018..12814  
/locus\_tag="wEsol\_01014"

CDS 11018..12814  
/locus\_tag="wEsol\_01014"  
/codon\_start=1  
/transl\_table=11  
/product="hypothetical protein"  
/pfam="Pfam-B\_10104"  
/translation="MEYKQHSVKIFLLNRVHSCKNHSQLHPDVKEAIAILSNDKLRA FYDEEVKKKTLQPILSYKECEQLYDKINYEKNESRIIIEREGLGENVRRVMGVKRFTN ESSREDQKNGTSPTGTSTNYRQEQVASSGDRTLYNSDIPSLGRSIKSSRSALFMPFGA SVDTSSTPIKPANPSNLVTTGENYTSNADLSDELNVSEVTKIVERMELLSNSLKKIQEI

VEKLGNTTLSEEVIVHERHFKKFMDFVGEILVDIGTRLPQSDSKSMYLEQKLKGLEKM  
NEFLDNSVQELEKKVDKLEKENKDFLAENDELKEKLATAKEEKELLFNKKEKMQEVIN  
GLNENNQRLMQKINGLEDDYEYLLRAEKTRETEDSCIQVEDADIPEGKAELCKDYEI  
KLVKLEQEIDAKGKQCEELLLENLILRGNIERLKEENKRLEGIEESFSIDPSHFCSVK  
NLHDELILANEQPENIDISIQDEMDSKVATESVGVNVKQGYSKRTSNLSRVSEQSSAV  
KSQFSEARAQSRKQIIYASASLILSGVFAVGTSLTMSHLGISISLALTALTFTLTLCY  
CSYKASTTLRNIELDRFTFKMADHEAVFMVPSL"

gene /besthit="qcoverage 100 , hcoverage 73.9184177997528 ,  
similarity 95.3 , identity 95.3 , evaluate 0.0 , alnlength  
598 , Bacteria , Proteobacteria , WP\_208571664.1  
hypothetical protein [Wolbachia pipientis]"  
complement(13655..14056)  
/locus\_tag="wEsol\_01015"  
CDS complement(13655..14056)  
/locus\_tag="wEsol\_01015"  
/codon\_start=1  
/transl\_table=11  
/pfam="Pfam-B\_13602"  
/fullproduct="qcoverage 100 , hcoverage 85.2564102564102  
, similarity 100 , identity 100 , evaluate 1.18e-93 ,  
alnlength 133 , Bacteria , Proteobacteria ,  
WP\_147737885.1 pyrimidine dimer DNA  
glycosylase/endonuclease V [Wolbachia endosymbiont of  
Drosophila ananassae]"  
/translation="MNIFVLDENPEIAAKMLCDKHIVKMLLETAQLLSNVFSIALKVP  
NPLVSITDQNIIEVPYKLTHKNHPCSLWARQSKGNFFWLIKYGRELCKEYTWRYKRKHR  
SEEVIDWCDSNKNLLVFQSTDIDKPFVQALPD"  
/product="pyrimidine dimer DNA  
glycosylase/endonuclease V"  
/besthit="qcoverage 100 , hcoverage 85.2564102564102 ,  
similarity 100 , identity 100 , evaluate 1.18e-93 ,  
alnlength 133 , Bacteria , Proteobacteria ,  
WP\_147737885.1 pyrimidine dimer DNA  
glycosylase/endonuclease V [Wolbachia endosymbiont of  
Drosophila ananassae]"  
gene complement(14057..>14214)  
/locus\_tag="wEsol\_01016"  
CDS complement(14057..>14214)  
/locus\_tag="wEsol\_01016"  
/codon\_start=1  
/transl\_table=11  
/product="hypothetical protein"  
/pfam="Pfam-B\_12708 Pfam-B\_12519"  
/tigr="TIGR01784 T\_den\_put\_tspse 273 conserved  
hypothetical protein"  
/translation="KGILIGHEKGRKEREIEVAKNLLKAGVSIDIIAQTTGLTANEIK  
DLSSLDV"  
/besthit="qcoverage 100 , hcoverage 69.8630136986301 ,  
similarity 100 , identity 100 , evaluate 2.37e-25 ,  
alnlength 51 , Bacteria , Proteobacteria , TLW86985.1  
transposase, partial [Wolbachia endosymbiont of  
Drosophila santomea]"

ORIGIN

1 gttgcaagcg ctactgcatt taggtttcca agataggggt cagctccttt attttaaagc  
61 aattttacaa tttcaatatc ttcatttctt aaggtcacat tgtttgaaaa acgcttttagc  
121 atctcagtat tttgctcagg agaagtatgt cgcaatagaa cttccattgt ttttcttgta  
181 tattgacttt tttcgctgta gctattagca ataattgctt gttctaattc aggagtgaca  
241 tcaatttttg ctccacgttg aaaaaggaaa gatgctaagt tatgattatt gtgttctaga  
301 gcgtaataaa ttggtgatcc attatttgat tcaataactt tattaacatc agctccatac  
361 ctcaacaata attttgcaac atctatattg ctgaacatac atgcaacgct taaagctgtg

|      |             |              |              |              |              |              |
|------|-------------|--------------|--------------|--------------|--------------|--------------|
| 421  | ccctctggac  | atatatcaat   | gttaagggtca  | atdddggccat  | ctcgcdddga   | taaaatatct   |
| 481  | tcgaagaact  | tgaaccaatc   | tttgaacatg   | caagcggttaa  | cgataagatt   | gtataacaca   |
| 541  | tgtdttagaat | cgtccgggca   | agttatatga   | aggtdcttta   | cttdcttdtat  | tagctcttct   |
| 601  | gcttcttgta  | aatttctgta   | aagaaatgcc   | ttaaataaac   | gacttgcaat   | atcttdttdtg  |
| 661  | tttctctgctc | ttgggtgtttc  | actatgctca   | ttatgtatac   | gcgattdtct   | accttcgtca   |
| 721  | tacttcttdtc | tttgttctgg   | atctactagt   | acttcatgtg   | cttdcatgag   | ttgttgaaat   |
| 781  | tttdtcttdtg | cttcttcatt   | gtcacattdt   | ctatctgggt   | aatattctag   | tgctaatttd   |
| 841  | ctatatgctt  | tttdtatgtc   | atcttgctta   | gcactctacac  | ctacttdtcaa  | tatttdtatag  |
| 901  | tagtcaacgt  | caacttdtaaa  | agagtgttda   | aaattdtcaa   | aatttdatctc  | ctcactaacc   |
| 961  | ggcataccccc | cccctaataga  | tatttdcttdt  | ttatgttaat   | ggtatcctaa   | acttagcttd   |
| 1021 | tgtcaacata  | aattctgttc   | tagtdtdtaaa  | aatcactcac   | tdtctagcat   | caacgaacat   |
| 1081 | ttatttdgttd | acttdtcttda  | aaaacataaa   | aatagtagct   | atatttdgtga  | gaacaatttda  |
| 1141 | aataaaaagcg | gcgttggtgaa  | aataaaaaca   | caaaattgtt   | gtaacaaagt   | taggtgtatt   |
| 1201 | agttcgtata  | taaatttagt   | aaaaataggc   | taatatagct   | gatttdgtgg   | tatagtaaag   |
| 1261 | ttactatata  | gaaaagttcg   | cacagatcta   | gcggtagacc   | aactgatccc   | aaaaaaactt   |
| 1321 | gttctcacgc  | ttgttattdt   | aagtdgtcta   | aagtdgttgt   | atcggttagg   | ttattagtaa   |
| 1381 | tatattdttac | taaattaata   | ccaattcatt   | tgaggataaa   | aaggaaaact   | aaggtaaatt   |
| 1441 | tatagcaaaa  | aaggtdtgtg   | ctcatcttdt   | gacaaagatg   | caatagaaac   | tctcatggaa   |
| 1501 | aagaggcaaa  | gattgtggaa   | gtatatagaa   | aaagcttdtat  | gacgctcaac   | gaaaaaaggg   |
| 1561 | aggcgtdtdtg | cttgcctgatg  | ttgcagggtga  | tgatgaattg   | aattaaaaat   | tdtatatata   |
| 1621 | atgtaagtgt  | agtaatatata  | ataaatatca   | aatatttdata  | ctgcattatc   | atctagcata   |
| 1681 | ctaacaaatt  | agaggtaatt   | tatgaacgaa   | atacaacaaa   | gagagttaaa   | tgaacaactt   |
| 1741 | tttaatgctg  | ttgtacaggg   | taatataggg   | caaattgagg   | agtdaatagt   | agctggagca   |
| 1801 | gaggttaatg  | cggtagatga   | gggtgaaaaa   | gcttdtdtcac  | gtcttdtctgc  | tdtaagtaat   |
| 1861 | acaagggaaa  | gaggggtagt   | agaggcagcg   | aatattcagc   | aacttagact   | cactccttda   |
| 1921 | cattatgctg  | tdtdtaagtgg  | cagagagatg   | gtagagcttd   | taatcgaaaa   | aggggcaaat   |
| 1981 | attaatatgg  | taagtgaaga   | tggaacctact  | cttdttacatt  | atgctgctgc   | tdtcagtgc    |
| 2041 | aaaagagagg  | tggttagagct  | tdtdaatcaaa  | gaaggggcga   | atgtdgatgc   | ggtdgatgat   |
| 2101 | aatggcaata  | ctccttdtatt  | tdctgctgct   | tdaagtggca   | aaagagagat   | ggtagagctt   |
| 2161 | tdaatcgaaa  | aaagggcgaa   | tattaatgcg   | gtgaatgaga   | gtaaaaatac   | tdccttdacat  |
| 2221 | gctgctactt  | taagtggcaa   | aagagaagtg   | gtagagcttd   | taatcggaga   | gggggcgcct   |
| 2281 | attgatgcga  | tagatgataa   | tggaataact   | ccttdtaagt   | gggctgctga   | acatagccaa   |
| 2341 | aaaggtgtga  | tagagtcttd   | acttdgaaaa   | ggagcgaaata  | tdgatgtgat   | agatggtgat   |
| 2401 | ggcaatactc  | cttdtaaattdg | cgtdattatc   | tcgaataaaa   | tagacaatgc   | tgagttaata   |
| 2461 | gtaaatcaca  | tagcaaaaact  | ggaagctact   | ggcttdtatatg | tcagtccaga   | gaatatacaa   |
| 2521 | cttdaaagctc | agataatgcc   | agaaatagaa   | aaaagaatat   | tdctacataa   | tcataaaacca  |
| 2581 | tdgattgatg  | cttdtatcgac  | gcattatgga   | agtaatttdt   | aagcaatgac   | attdactggt   |
| 2641 | ataaagaaca  | ggagtacgaa   | ataatacact   | aatttdacttd  | gtagacttdcg  | aagatgttdac  |
| 2701 | aacaagacat  | gtdcctacac   | tgaaagtcaa   | gacatttdgca  | gagatggtda   | aaaataaaga   |
| 2761 | tataaatagt  | aaccttdgagt  | gcccagcac    | tgaacaaaact  | caaggagcta   | gtcattctct   |
| 2821 | taattaaaga  | aggatacatg   | gagacctgct   | gcgaaaaaaa   | gaagaggtgt   | tdcctcgcttdg |
| 2881 | tatgaagtat  | tdtdtaaacgt  | ggttdtdtdtda | aagatcataa   | tdtdtaccaca  | aaaactgggc   |
| 2941 | tdtctcttdtg | cagcaggtct   | taagcctccg   | cagcggaacct  | tdcgattcca   | aagcaacttc   |
| 3001 | tdtctctgtdg | catttdattgg  | tdtdgtggaat  | agtagaaaata  | tdgttdtdtaat | atctacataa   |
| 3061 | agacatacat  | ataattaaga   | aaaagacaga   | agaaaagaat   | ataagaaatt   | agaactgaca   |
| 3121 | agcaaaaact  | tgcttdtdtda  | tdtaaatagct  | gtacaatttda  | ggcatgtgtt   | tdtaatttdtg  |
| 3181 | aggdataggt  | atgatagact   | tdtatgaagaa  | tgaatttdgaa  | ataatatttdg  | aggggataga   |
| 3241 | ggaaaatcca  | agtatataca   | gcaataacac   | aactacaaga   | atagcaaatg   | aattacaaga   |
| 3301 | atataattca  | agaaggtcaa   | gcgaaattaa   | tgaatctagt   | gaatctattc   | accacaaaat   |
| 3361 | gcagctattg  | gatgaaaact   | ataacagaga   | gacacagtda   | tdgagtgaaa   | actatggcag   |
| 3421 | aaagatacag  | tdgtdtaaaact | accagtacaa   | tagtdaaattg  | tdacaggagc   | tdgcataacaa  |
| 3481 | tgccaatagt  | agtdaaatcca  | attatgattc   | tagacatgct   | atacctgatt   | atgattggga   |
| 3541 | atatgaaagg  | tataataata   | gtdtdgaaaga  | tagcgaaagca  | aaattdtaata  | tdggaattcaa  |
| 3601 | gaaatatgag  | aatgagctca   | gagagtdtaga  | gcaggagcgt   | tdtagtdataa  | aacatataat   |
| 3661 | gcatgaatgt  | aatcagtdgga  | aaaaacatgg   | gtdtdgatata  | aattacatttd  | tdcaaagtaca  |
| 3721 | agatgattct  | aaccatacaa   | aagaatatac   | attattacat   | tdtdgctgcaa  | attdtdgggga  |
| 3781 | tataaatgtd  | acaaaattac   | tdgttagaagg  | aggagcaggt   | gtdgatataa   | aagatcaaaa   |
| 3841 | cggaataact  | tdcttdtgcact | tatccgcctc   | caatggctat   | atagacatag   | tagaacttdct  |
| 3901 | agtdgaaagaa | ggatcagacc   | ctaagttagt   | gaataaaagac  | ggaaataact   | ccttdgcactt  |
| 3961 | agctgctgca  | aatggccata   | tagacataat   | agaacttdcta  | gtgaaagaag   | gatcagacct   |

|      |             |            |             |             |             |             |
|------|-------------|------------|-------------|-------------|-------------|-------------|
| 4021 | taatgtagtg  | aataaagacg | gaaataacttc | cttgcaactta | gctgctgcaa  | atggccatat  |
| 4081 | agacataata  | gaacttctag | tgaaaaaagg  | atcagatcct  | aatgtagtga  | ataaagacgg  |
| 4141 | aaatactcct  | ttacatagtg | ctttctataa  | taattgcaca  | aaggtagtta  | agtatttaat  |
| 4201 | aggaaaagaa  | ccaagtatga | aagaagttgt  | agagcatcta  | gtgaggtgtg  | tagtagaaga  |
| 4261 | tagagcacat  | acgttactaa | aaggctcgta  | tcctttacat  | ttagctgcta  | tttatgactg  |
| 4321 | cacagaagta  | gcagagtctt | tactgaaaaa  | gtgggaaaaa  | cctttgttaa  | aagacactaa  |
| 4381 | tggtaaaact  | ccaagagagt | tagccacaga  | tgaaagttaa  | atacagcttt  | tcggggaagc  |
| 4441 | agaaataaaa  | caacaagaat | ataatgcaac  | caagtggggt  | cttgtttagtg | gcggtatcaac |
| 4501 | agcagtatta  | ggtatagctg | cgacaaccat  | ttttgcaaca  | gtattttaca  | ttggattttct |
| 4561 | gcctatagta  | ggggcggttg | ctgcagccac  | aacacttgcg  | ttagcggttg  | gtgggactac  |
| 4621 | atatatgata  | ttaaagccca | gtgctaaaaa  | agagagaatc  | gaatgtgaag  | aaacatacat  |
| 4681 | ctgcagaact  | taggcttggt | gaagtttagc  | tccttggtga  | tggaatatgc  | aactactatc  |
| 4741 | ggcttgatgt  | gcatccccaa | agtgtagtgg  | tatgggcggt  | atctgactca  | tagacgtcgt  |
| 4801 | ttcaattatt  | aaatatgtta | aagtacaaac  | atgaatgagt  | tagaaaaaag  | tttgttcaag  |
| 4861 | ctatatgaaa  | aagtgaaaaa | tctaggggta  | gtgtgctgca  | aaacctaccc  | attccaaaaa  |
| 4921 | aaaattgttc  | tcacgctggc | tggttttggt  | tgctggaaat  | ggttgcatcg  | tttaaattta  |
| 4981 | ttaatgttat  | acactaccaa | attataagaa  | cctccttcaa  | ctttacccaa  | ctcgacacat  |
| 5041 | atactttttg  | aaacattgct | gcaagtagaa  | aaaaacaggt  | taccacacct  | aacttcttta  |
| 5101 | aatttgctca  | caatctttac | ttgatgcata  | aggtttttgt  | tacactcctt  | tcacttaccg  |
| 5161 | attacctcta  | cctaccgcct | ttacctttgc  | taaggtcaga  | aacacgacta  | gcttcaggac  |
| 5221 | cttctaaact  | cgactgtggc | aggccaccaa  | aattactgga  | atcactaaca  | ctaagcgata  |
| 5281 | taggtgcttc  | tactggtcca | caccctcctc  | ccactctgtg  | atataccta   | tctagataag  |
| 5341 | tacgtagtaa  | tggatcaatt | tgttctctat  | tttgaatgta  | tgcttgcaat  | tgcacacttt  |
| 5401 | gaaatcccgg  | atcattcctg | aataattgtg  | aaatgcccac  | tcttatgttc  | tgaaagtaat  |
| 5461 | ttctatctct  | gtttgggtgg | cctcttccaa  | gaaaatcgcg  | tattatattt  | atgatattct  |
| 5521 | gcacttgccc  | aacaggattt | tcgtttagaa  | ctcgattaat  | atcactagca  | ttttctaata  |
| 5581 | cccataaacc  | acaattccaa | ccatctgttt  | gctgactaac  | agaaacatta  | ttaatcctga  |
| 5641 | tattattttc  | taagttattt | tgaatgatat  | cagtaatacc  | acctggaaca  | gcagtagcag  |
| 5701 | ttgaatcagc  | atagtagcca | acatagttcc  | cattttgacg  | ttcaatcact  | agtgtaaccc  |
| 5761 | aatgagtatt  | atttaaagta | atgattaaag  | ttaaacgctg  | ttgtttttca  | ttttccctaa  |
| 5821 | attgatttaa  | tactctaaca | atgtgctcgt  | taccgtcatt  | ccttgccaaa  | ttagctactt  |
| 5881 | caaaagtgtg  | attaccttca | gtacgaagct  | gatatacgca  | tcttccagcg  | tgagctatat  |
| 5941 | caatttggtg  | aagccagtaa | tcataatgtc  | cattttctcgt | cgcaaattct  | agcgtaagta  |
| 6001 | gatcattttac | ttctatccct | tgattttctaa | gaatatctct  | tattttgtctt | cttatctctt  |
| 6061 | gtgctgtagg  | aatggaatta | tcacctctcc  | ttattcttga  | ctttaatggt  | tctattacct  |
| 6121 | gtgctctagt  | accttgcaag | taactaaatg  | gaacgtgcag  | attatcatct  | atatcaagca  |
| 6181 | aaaaaatcga  | gttctgtcct | ggttttcttt  | ccgtgtaaaa  | gcgcctgaaa  | ttttcacgag  |
| 6241 | tctgatctga  | taatagaccc | tctggtggat  | tttcatcaat  | aacactttca  | gggtcccacta |
| 6301 | atactcctgg  | tcttgagtca | cgaccaccac  | gatcaagtct  | atgtacatac  | tcttctcttc  |
| 6361 | ctattccttc  | tggaatagat | ataagacctt  | ctactctctc  | tgcacctgca  | ttaaatataa  |
| 6421 | gaggaagtaa  | aaccacctca | tttccagaag  | taataggcac  | atatacctctc | tgcttgttta  |
| 6481 | taagttcttt  | tatttgatct | tttgcgttat  | tctccttttg  | tattattttct | tctgcattac  |
| 6541 | cagcaaactc  | taatatatat | ccaattggat  | gagtatctgc  | tgtagggttg  | cttaataata  |
| 6601 | aaaggtctaa  | tctctgttct | gtaattcctg  | tgagtattgc  | cctttctcct  | tcttcttctt  |
| 6661 | gacccctttt  | caaactatat | gtttgaccaa  | ctttatacat  | agcaagcact  | ttataaggat  |
| 6721 | tatcactagc  | ataaaatgta | ccatgtagta  | tagaacgaaa  | cttatcctca  | ctattaacat  |
| 6781 | ttattgcgtc  | cctaagtggc | atcaatgctc  | cagagatctc  | ttgaaatagt  | tctctatgct  |
| 6841 | gacctacatt  | tttccagcca | tcattcataa  | ccctttctga  | aataccatgt  | acattttcag  |
| 6901 | cattaggtac  | ttgtacaaga | tcaccatcaa  | gaaaattatt  | tgcatattta  | ttttggtaat  |
| 6961 | cgtgatataa  | accaaggtca | tttggttgat  | caatatctag  | ctcaaattgg  | tcattaagtg  |
| 7021 | tgcatgaaac  | ttcccataca | tgaacattat  | ttctattaac  | attaagagct  | tgtaaatcga  |
| 7081 | tagcttcttg  | ctggtgcgca | tcgtaagctc  | taatatgaag  | tgtaactata  | ttataaccct  |
| 7141 | gagcataaga  | gaccatagtt | aaagtatgtc  | ttcttaaate  | tccatcaccc  | tatctaaata  |
| 7201 | tatactttct  | tacacgtact | cgatcttctc  | cttcttccag  | ctctaaatac  | tctctatcaa  |
| 7261 | aagcactact  | tccaaaagca | aaaccagtta  | tacaatcaaa  | tattctgtta  | taatttctctg |
| 7321 | cattttcttg  | tatttcacca | ggaagatggt  | gaagcaagaa  | atctctaata  | ttctctccaa  |
| 7381 | cctcttctac  | ttctatatac | tcaaacaatc  | tttgacttaa  | aggaaacctg  | ccctgttgaa  |
| 7441 | gccctactgt  | atcaacccta | aaaggaattc  | gatttaaatt  | aaaatttaat  | ccaacacaga  |
| 7501 | cagtattttct | tgattcagta | tggataggta  | taaatagaaga | attgtgtaac  | cttccagcgt  |
| 7561 | agcctatggc  | acagtttaat | gcaacatctg  | acggtgtgtc  | aaatatagca  | agattaataa  |

|       |             |             |             |             |            |            |
|-------|-------------|-------------|-------------|-------------|------------|------------|
| 7621  | caataggaat  | atthttctctt | tctgcttgat  | gatgtataag  | aatgcaaca  | tgtgagtttc |
| 7681  | taggagataa  | gtcaagatcg  | atgcctattg  | tgtagcgatg  | actaaaattt | gctaaaaaac |
| 7741  | ctaataaaaa  | cccgtagctc  | tcaaattttt  | gattgcgatt  | ttcaatatta | ttttctagcg |
| 7801  | cttgtctgca  | attatcatag  | atgtcagtta  | tatatggcaa  | aacttccctg | tgcattctac |
| 7861  | gttctacatt  | ttgtcttttg  | ttatttgcta  | gtattttccat | aaagttgtca | atcctttgtt |
| 7921  | gaccttgtgc  | tacctgtgca  | aaattgactg  | atctatcaag  | ttgtctgagc | tgattttgat |
| 7981  | tgagttgtct  | tccttttatt  | tcctgaattg  | tcaatctgtg  | atctcctaag | agttgtctaa |
| 8041  | gaagactaat  | ctcagatgct  | gaatatttg   | caaatttatc  | tctacccta  | aaatcctttt |
| 8101  | cacgaatcac  | ctcgaatact  | gttgcaattg  | cctctccctg  | actcttgcc  | tttccatgca |
| 8161  | tgcatacttt  | atattgctca  | aaatctaggt  | ctccttccct  | taaatctgga | ttttgctgta |
| 8221  | taatcttttg  | tattagagca  | tttctctccc  | ttgtactaaa  | ccttaaccca | tcactgttag |
| 8281  | ggcgatcaga  | aatgctgtaa  | cacttgacaa  | ctcgctgtcc  | gtcacgacta | cgagttaaaa |
| 8341  | cagcaacctt  | taagtttcct  | gtattttctat | tcctaccacc  | tgtatcaata | ccatgattat |
| 8401  | caaaacgaaa  | atagactctc  | tcatttgcat  | ccaagatatc  | agcatcatgt | gcagtagcaa |
| 8461  | acatgctaaa  | aaagaataca  | ggaaggaaac  | gacctgcact  | tacatgatac | aagaaagatg |
| 8521  | gacattgatc  | taaaaaagat  | tcaaatcctt  | gtctgaatcc  | ttcaagatct | ccatccacca |
| 8581  | aactccta    | aagtccatca  | ccattactca  | tacaaaatac  | cccttattta | ctacgaccag |
| 8641  | aaacaccaag  | agttcataag  | tagattactt  | attaccacta  | agcgtaaaga | cgcttttttt |
| 8701  | cttataagaa  | gaaacaccac  | ttacactagg  | agttccaagc  | tcagactg   | gaccatcatc |
| 8761  | aactggcaaa  | gttgtttcct  | tactaccatg  | agcttttagat | cgtagccgta | aattattcca |
| 8821  | aggaccatca  | cctacaggac  | caagaggtag  | agttgttttc  | tctaactcag | agaataactc |
| 8881  | ttctgcaaac  | aaaccgtaat  | ctacgtaatc  | cttcattcct  | tcctaccgc  | ataatctaag |
| 8941  | gttttttatt  | atcttttcct  | taaagaactc  | aaacttttca  | ggaaagcaat | ctttagcaaa |
| 9001  | taatattaca  | tctaataattt | cttttttctc  | tacttctttt  | tcctcatcag | acttataaat |
| 9061  | gtcttctcgt  | ttccagttaa  | ttattaacct  | tgcaagcatg  | tcctgtatag | gaactataca |
| 9121  | attagaaata  | ttaacagaaa  | tctttctgta  | ttcaataaag  | cagtcacatt | tccaaatctt |
| 9181  | cataataaga  | gatctagctt  | gaacatttga  | ttcaggattt  | ttcaacatta | catttgaaag |
| 9241  | tgagtaaaga  | aggaggatcat | actcatcctg  | tgagagtatt  | tcctttgaat | gatcacctcg |
| 9301  | tgctgaagct  | tcctcataac  | accagcactg  | taccaaatca  | tgaaccgtat | caaaaaaaca |
| 9361  | tgactctatt  | aattcagcaa  | aaagggaata  | tattccttta  | tctttctg   | ataatttctg |
| 9421  | taaaagagta  | tctttatcag  | ctatattcct  | tacacaaaaa  | tctaaaatag | gagcatcttt |
| 9481  | ctcaacagat  | tgaggactag  | aaagagcaat  | aatagcttct  | gtaagcttct | tctctttatc |
| 9541  | ttcttctttt  | aatgatttat  | aaaaatactc  | tactccctca  | ctccaccta  | gttttacagc |
| 9601  | actgtcaaa   | ccttctactg  | catcatactt  | ctttaattcc  | ccagattctc | tatcgatcca |
| 9661  | gaaatcaaac  | acaggaccat  | ttctcttcat  | ggatgatagc  | agaatgtttc | ttacatattg |
| 9721  | atcactgatc  | ggattacctt  | gactatctac  | ctcttctgaa  | gtaaattgac | ctctagagag |
| 9781  | tacaaactgt  | ttgttgaaaa  | aatcacctat  | cttgcccgtt  | atacagtacc | tagatgccat |
| 9841  | accatacctt  | ggtagtggtt  | tatcgatttc  | tcctattttc  | tcttcagtca | atctctgacc |
| 9901  | taaaacagta  | ttattttaacc | ttgtacctaa  | ccaacaacct  | tcatctcgaa | aaacattata |
| 9961  | taagaattcc  | agcttatcat  | ccttaaaaaag | tttgatatac  | tctatatagg | tctcgaccca |
| 10021 | ccttttaata  | gctaactttc  | ttccagccgc  | aatgtcacga  | tctgtatggt | ttatcacatc |
| 10081 | ttgtagcttt  | ttaagcactt  | cagcctgacg  | ttttgtttct  | attggcattt | aaacctccct |
| 10141 | atatcatgaa  | aacaacgcta  | tggtactaaa  | tttgtaacta  | agttacaaca | cctaattact |
| 10201 | ccagaaagac  | ctatttgata  | cccaaactgt  | ctggtcaggc  | ctagagaaat | ctgtctggaa |
| 10261 | ttattgagta  | ttttctagaa  | atcttaattt  | gacagctaac  | accaggtttt | ctggagacta |
| 10321 | taggtgatgc  | actttttcta  | tttatattcc  | caagaataag  | gtcagtagat | atgttgtttt |
| 10381 | ccagaagaat  | attagtaaga  | tttaattggag | aagtgttat   | gactttaact | aagtgtgttt |
| 10441 | taacttcgcc  | cttaagttct  | gttcagcagt  | atctgttagt  | gttaggtaag | gttatggttg |
| 10501 | taaatacaaa  | atccgatcag  | cagagggctg  | aagatgatct  | atatactgtt | ttgagattca |
| 10561 | aagaaaaagg  | agattttgaa  | agacggataa  | gagaactgct  | tgtaaacgat | tataagaaac |
| 10621 | ttaaaaaacc  | actgagcaaa  | ctccttggtg  | agttagaagg  | taaaaaagg  | actgataaag |
| 10681 | agaataacca  | agcagccaga  | aacgtttatg  | atcaaatcaa  | aaaatctaaa | actaatgaag |
| 10741 | ataaatttaag | taattttattg | aacttttaaaa | aacagctaaa  | agcttttcta | aaaaatcaag |
| 10801 | atgattgtag  | tattgtgtta  | aatgcgattg  | actctgcaag  | tgttatccct | gttattgaag |
| 10861 | ttaatggtgt  | gcatccaaaa  | gatagtgaga  | tcaaaaagt   | aaaaaaagt  | caacctctca |
| 10921 | cctctcacct  | ctcacctcta  | acagacaaga  | ctttgaagaa  | gctctaggat | acatagaatc |
| 10981 | acaagaaaaa  | gttatgggga  | ttacattaga  | ggaaattatg  | gaatacaagc | aacactctgt |
| 11041 | taagattttt  | ctactgaacc  | gtgttcattc  | atgcaaaaat  | gggcattctc | aattgcatcc |
| 11101 | tgatgtaaaa  | gaagctatag  | caatattatc  | aatgataaag  | ctgagagctt | tctacgatga |
| 11161 | agaagtaaag  | aagaagacgc  | tacaaccaat  | attgtcctac  | aaagaatgtg | aacaattata |

```

11221 tgataaaatt aactatgaaa aaaatgaatc tcgtattata atcgaaagag aaggacttgg
11281 agagaatggt aggagggtaa tgggagttaa gcgctttacg aatgaaagca gtagagaaga
11341 tcagaaaaat ggtactagtc caacaggaac ttctacaaat tatagacaag agcaagttgc
11401 ctctagtggg gatagaacac ttataaatag tgatatacct tcactaggta gatcgattaa
11461 gagcagccga agtgcactgt ttatgccatt tggagcttct gttgatacga gtaccccgat
11521 taaacctgcc aatccatcta acctagttac cactggtgag aattatacta gtaatgcaga
11581 tctgagtgat gaattgaacg taagtgaagt aactaaaatt gttgaacgaa tggagctatt
11641 atccaatagt ttaaaaaaaa tccaagaaat tgtggaaaag ctgggtaata ctacactaag
11701 tgaagaagtg atagttcatg agagacattt caaaaagttt atggattttg taggagaaat
11761 tctcgtagat attggtacaa gattaccaca aagtgattct aaaagcatgt atcttgaaca
11821 aaaattgaag ggattggaaa agatgaatga attcttagat aacagtgttc aagagttaga
11881 gaaaaaagta gataaacttg aaaaagagaa taaagatttt ctagcagaaa atgatgaact
11941 taaggaaaaa cttgctacag cgaaagaaga aaaggaattg ctattttaata aaaaagaaaa
12001 gatgcaggaa gttataaatg ggctgaatga gaacaatcaa cgattaatgc aaaaaataaa
12061 tggggttagaa gatgattatg agtattttgtt aagagcggaa aagacaaaaa gagaaaccga
12121 agattcgtgt atacaagtgg aggatgcaga tataccggaa ggaaaagctg agttatgtaa
12181 agactatgaa attaaactag taaagctgga acaagagata gatgcaaaag ggaaacaatg
12241 tgaggaattg ctattagaaa atagtatatt acgaggaaat atagaacgat taaaggaaga
12301 gaataaacga ttagaaggca ttgaagaaag ctttagtatt gatccctcac atttttgctc
12361 tgtaaaaaat ttgcatgatg agcttattct agctaataaa cagccggaaa atattgatat
12421 atcaatccag gatgagatgg attcaaaagt tgccactgag tctgtgggtg ttaatgtaaa
12481 acaaggttat agtaaaagga ctagcaacct atctcgagtc tctgaacaaa gttcagcagt
12541 aaaatctcaa ttctcagaag caagagctca gagtagaaag caaataatth atgcctctgc
12601 ttctcttata ttatctggag tatttgctgt tggcacaagt ttaacaatgt ctcathtagg
12661 aatatctatt tcacttgctt tgactgcatt aactttcctt acattgggat gttattgttc
12721 atataaggca agtacaacgc ttaggaatat tgaacttgat cgaactttta aaatggctga
12781 tcatgaagct gtttttatgg ttcccagctt ataactatgt ggaaaaatat attgttttac
12841 tcaccccaag aaaagagata atgggaaaga taaaaggtc tatcagttct cgggtcggca
12901 gattaatttc tgacggtgat atagagcatt acttatttct ctagagaata ggggaattggc
12961 gaatagagtt ctaggtgtag aaggagatat agatgaagaa aagaccagat ttagtagaaa
13021 aatataaggg cttctttgta aatgatagta agggaaacagc aaagtagtta tattaaggga
13081 ctggttttat gttctgaact cagattttcg ttaggttata aaagaagtaa tatcgagacc
13141 ttactttgaa attccagatt atcagagtac tttgctcttc tgaagtgagt gatgttgtaa
13201 tacctctgga tcgcagttact aataaccaa attaaagagt aaatagttta taatttaagt
13261 atttataata gagaaattag catgtatcta aatttgagca gcaaatacct tgaaattacc
13321 atcaattcag taaaattgaa gagttttaat ggtttaaatca tgtaaagtat tcaataaact
13381 gccgttttta aattttatca gactcagtta aaagagtgga gatttttaatg atttacctca
13441 aatctaatta agagttaaag tgagaagatg ttttagtttt tatgcacctt cctctctact
13501 aattaaggcg ttctttttat ttgcggcttt tcagacgtac gattctgctt agcaaccaat
13561 ccggtacttc tctacccttt tcccacttag caaacctcat cttttctttt aggtagtact
13621 ctctgtaagc ttttactgaa tgactagact tatattaatc tggtaacgcc tgtacaaaag
13681 gctttatata ggttgattga aaaacaagca aattcttatt actatcacac caatctataa
13741 cttcttctga tctatgtttt cttttatata gccaaagtata ctctttgcac agctcccttc
13801 cgtattttat taaccagaaa aagttccctt tggattgtct agcccataga gaacaagggt
13861 ggttttttgt agtaagttta tatggaactt ctatattctg gtctgtgatg ctgactaaag
13921 gatttggcac ttttaattgct attgaaaaaa cattactcag taactgagca gtttctaata
13981 gcatttttac tatatgctta tcacataaca tttttgccgc aatctctggg ttttcatcta
14041 gtacaaagat gttcatctaa acatccaaag agcttaagtc ttttaatttc ttagctgtaa
14101 gaccagtagt ttgagctatg atatcaatag aaactcctgc ttttaagtaga ttctttgcaa
14161 cttcaatttc cctctctttt ctgccttttt catgtccgat gaggatgcct tttg

```

//

```

LOCUS      JAQZAU010000091      6969 bp      dna      linear      ENV 17-MAR-2023
DEFINITION MAG: Wolbachia pipientis isolate wEsol contig_45754, whole genome
            shotgun sequence.
ACCESSION  JAQZAU010000091  JAQZAU010000000
VERSION    JAQZAU010000091.1
DBLINK     BioProject: PRJNA929258
            BioSample: SAMN33142973
KEYWORDS   WGS; ENV; Metagenome Assembled Genome; MAG.
SOURCE     Wolbachia pipientis (insect metagenome)

```

ORGANISM Wolbachia pipientis  
Bacteria; Pseudomonadota; Alphaproteobacteria; Rickettsiales;  
Anaplasmataceae; Wolbachieae; Wolbachia.

REFERENCE 1 (bases 1 to 6969)  
AUTHORS Fiutek,N., Couger,B.M., Roy,S., de la Torre,J.R. and Connor,E.F.  
TITLE Genomic assessment of the contribution of the Wolbachia  
endosymbiont of Eurosta solidaginis to gall-induction  
JOURNAL International Journal Molecular Sciences

REFERENCE 2 (bases 1 to 6969)  
AUTHORS Fiutek,N., Couger,B.M., Roy,S., de la Torre,J.R. and Connor,E.F.  
TITLE Direct Submission  
JOURNAL Submitted (10-FEB-2023) Biology, San Francisco State University,  
1600 Holloway Ave, San Francisco, CA 94132, USA

COMMENT ##Genome-Assembly-Data-START##  
Assembly Date :: JUN-2019  
Assembly Method :: FLYE v. 06-2019  
Genome Representation :: Full  
Expected Final Version :: Yes  
Genome Coverage :: 100.0x  
Sequencing Technology :: Illumina HiSeq; PacBio Sequel  
##Genome-Assembly-Data-END##

FEATURES Location/Qualifiers  
source 1..6969  
/organism="Wolbachia pipientis"  
/mol\_type="genomic DNA"  
/submitter\_seqid="contig\_45754"  
/isolate="wEsol"  
/isolation\_source="galls on Solidago altissima"  
/host="Eurosta solidaginis MN-2018-EFC"  
/db\_xref="taxon:955"  
/environmental\_sample  
/country="USA: Cowling Arboretum, Carleton College,  
Northfield, MN"  
/lat\_lon="44.48 N 93.13 W"  
/altitude="280 m"  
/collection\_date="2018-11"  
/metagenome\_source="insect metagenome"  
/note="metagenomic"  
gene <1..552  
/locus\_tag="wEsol\_01017"  
CDS <1..552  
/locus\_tag="wEsol\_01017"  
/codon\_start=1  
/transl\_table=11  
/fullproduct="qcoverage 101.092896174863 , hcoverage 100  
, similarity 97.8 , identity 96.8 , evaluate 3.34e-115 ,  
alnlength 185 , Bacteria , Proteobacteria , MBS9529803.1  
hypothetical protein [Wolbachia endosymbiont of Ceratitis  
capitata]"  
/translation="LDGTISTTGSDANEEFINLLSENLRERLLGSGVALEDEDVDDIV  
EVRVSTVIDLLSDYAKLEDNKEHRELLISKVADNLGLSTQDKTAPEVLMELGSLPSLI  
KGQVNHNQVQSVNTFIKLIIEGKSEVYKKGGAINGAIHKEIDKAIVEQEKKATNKQDI  
ENDKWTDRIKKQNYSAESHEHLP"  
/product="hypothetical protein"  
/besthit="qcoverage 101.092896174863 , hcoverage 100 ,  
similarity 97.8 , identity 96.8 , evaluate 3.34e-115 ,  
alnlength 185 , Bacteria , Proteobacteria , MBS9529803.1  
hypothetical protein [Wolbachia endosymbiont of Ceratitis  
capitata]"  
gene complement(506..832)

```

CDS      /locus_tag="wEsol_01018"
         complement(506..832)
         /locus_tag="wEsol_01018"
         /codon_start=1
         /transl_table=11
         /fullproduct="qcoverage 100 , hcoverage 100 , similarity
100 , identity 100 , evalue 9.11e-72 , alnlength 108 ,
Bacteria , Proteobacteria , WP_015589103.1 MULTISPECIES:
hypothetical protein [unclassified Wolbachia]"
         /translation="MLEKIRQNIFGHFKYLPATEERAMLCDLTNFKSSNDQLTRIDQ
VLNRDQLEHFTNVLETYDATARSFYDEVRCIATVATMNSKIFKEPTNIFKVNHVHVIP
QNNSVF"
         /product="hypothetical protein"
         /besthit="qcoverage 100 , hcoverage 100 , similarity 100
, identity 100 , evalue 9.11e-72 , alnlength 108 ,
Bacteria , Proteobacteria , WP_015589103.1 MULTISPECIES:
hypothetical protein [unclassified Wolbachia]"
gene     complement(859..1569)
CDS      /locus_tag="wEsol_01019"
         complement(859..1569)
         /locus_tag="wEsol_01019"
         /codon_start=1
         /transl_table=11
         /fullproduct="qcoverage 100 , hcoverage 100 , similarity
100 , identity 100 , evalue 3.69e-165 , alnlength 236 ,
Bacteria , Proteobacteria , WP_015589102.1 MULTISPECIES:
heme ABC transporter permease CcmC [unclassified
Wolbachia]"
         /cog="CcmC COG0755 281 ABC-type transport system involved
in cytochrome c biogenesis, permease component"
         /pfam="Cytochrom_C_asm"
         /tigr="TIGR01191 ccmC 184 heme exporter protein CcmC"
         /product="heme ABC
transporter permease CcmC"
         /translation="MFLKPTNFSYFSKKALPWLGVICFACFLIGMSLALFFSPEDYK
QGEIVRIMYIHVPSAWLALGIYGLIASLSFISLVWNSVASVLAHAAAPAGTIFSAIC
LITGSIWGKGTWGTWWVWDARLTSMILLFLYVGYSLSWSAFDNEARAEEKSAAVFAIF
SAINIPIVKFSVNLWSTLHQPASILRKGGIAIESSLLLPLVAMFMFCATFFLVVWILY
SLYLINLYKIKREISMRY"
         /besthit="qcoverage 100 , hcoverage 100 , similarity 100
, identity 100 , evalue 3.69e-165 , alnlength 236 ,
Bacteria , Proteobacteria , WP_015589102.1 MULTISPECIES:
heme ABC transporter permease CcmC [unclassified
Wolbachia]"
gene     1705..2535
CDS      /locus_tag="wEsol_01020"
         1705..2535
         /locus_tag="wEsol_01020"
         /codon_start=1
         /transl_table=11
         /fullproduct="qcoverage 100 , hcoverage 100 , similarity
100 , identity 99.6 , evalue 1.98e-189 , alnlength 276 ,
Bacteria , Proteobacteria , WP_015589101.1 MULTISPECIES:
kinase/pyrophosphorylase [unclassified Wolbachia]"
         /cog="COG1806 COG1806 273 Uncharacterized protein
conserved in bacteria"
         /pfam="Kinase-PPase"
         /product="
kinase/pyrophosphorylase"
         /translation="MTLKKLNLHLVSDSSGETVISVAKSALKHFRSIETIEYVWSFVK

```

```

KEEQIDKILEEINRKSDENHFVICTITDDELRLKYLKDNCIKLKIPYRAILSHIIREIS
SYLEIEKDEKLDLYTEINNEYFQRIEAINYNTINHDDGQNIQDIDKADIILVGVSRTSK
SPTSTYLAYRGYKVANIPFVSGVPPFYVDLAKLKNKLTIGVTIDVSRLEIRKNRLTSI
NNEDNNIYANPEKVEKEIKEAEELFKQNNWPIIDVTQKSIEEVSATIIQYFNKMLSID
"
/blasthit="qcoverage 100 , hcoverage 100 , similarity 100
, identity 99.6 , evalue 1.98e-189 , alnlength 276 ,
Bacteria , Proteobacteria , WP_015589101.1 MULTISPECIES:
kinase/pyrophosphorylase [unclassified Wolbachia]"
gene 2585..2713
/locus_tag="wEsol_01021"
CDS 2585..2713
/locus_tag="wEsol_01021"
/codon_start=1
/transl_table=11
/fullproduct="qcoverage 100 , hcoverage 100 , similarity
100 , identity 100 , evalue 4.05e-21 , alnlength 42 ,
Bacteria , Proteobacteria , WP_006279631.1 MULTISPECIES:
type B 50S ribosomal protein L36 [Wolbachia]"
/cog="RpmJ COG0257 38 Ribosomal protein L36"
/pfam="Ribosomal_L36"
/tigr="TIGR01022 rpmJ_bact 37 ribosomal protein L36"
/product="type B 50S
ribosomal protein L36"
/translation="MKVKGSLKSHNRDNCKVVKRGGKIYIINKVKPRCKARQGS"
/blasthit="qcoverage 100 , hcoverage 100 , similarity 100
, identity 100 , evalue 4.05e-21 , alnlength 42 ,
Bacteria , Proteobacteria , WP_006279631.1 MULTISPECIES:
type B 50S ribosomal protein L36 [Wolbachia]"
gene 2763..3077
/locus_tag="wEsol_01022"
CDS 2763..3077
/locus_tag="wEsol_01022"
/codon_start=1
/transl_table=11
/fullproduct="qcoverage 100 , hcoverage 100 , similarity
100 , identity 100 , evalue 1.55e-59 , alnlength 104 ,
Bacteria , Proteobacteria , WP_015589100.1 MULTISPECIES:
septum formation initiator family protein [unclassified
Wolbachia]"
/cog="COG2919 COG2919 117 Septum formation initiator"
/pfam="DivIC"
/product="septum formation
initiator family protein"
/translation="MLISKKKQKLLCLSAALLISLTLYFSISTITGKRGLLTLDLK
KEIEYNKLLLLKDVSSSEKEKLDNKVFGLEYEKSLDLLLDEQAKNALGYVNPNELMVLD
VK"
/blasthit="qcoverage 100 , hcoverage 100 , similarity 100
, identity 100 , evalue 1.55e-59 , alnlength 104 ,
Bacteria , Proteobacteria , WP_015589100.1 MULTISPECIES:
septum formation initiator family protein [unclassified
Wolbachia]"
gene 3365..3718
/locus_tag="wEsol_01023"
CDS 3365..3718
/locus_tag="wEsol_01023"
/codon_start=1
/transl_table=11
/fullproduct="qcoverage 100 , hcoverage 100 , similarity
99.1 , identity 99.1 , evalue 2.33e-76 , alnlength 117 ,

```

```

Bacteria , Proteobacteria , WP_081420800.1 MULTISPECIES:
transposase [Wolbachia]"
/cog="COG2963 COG2963 116 Transposase and inactivated
derivatives"
/pfam="HTH_Tnp_1 HTH_23 HTH_28"
/product="transposase"
/translation="MVREYTAEFKLEAVKLANEQRKAGQTITKIAKDLGIKGGLLGKW
IKKHNEKKSAADAFPGRGNMAPYDKERFDLQSKSNKGKRHLKKSPPGQSKRVKYFFIKE
HSNCYKVQELCRIFC"
/besthit="qcoverage 100 , hcoverage 100 , similarity 99.1
, identity 99.1 , evalue 2.33e-76 , alnlength 117 ,
Bacteria , Proteobacteria , WP_081420800.1 MULTISPECIES:
transposase [Wolbachia]"
gene 3897..4094
/locus_tag="wEsol_01024"
CDS 3897..4094
/locus_tag="wEsol_01024"
/codon_start=1
/transl_table=11
/fullproduct="qcoverage 100 , hcoverage 100 , similarity
100 , identity 100 , evalue 1.88e-40 , alnlength 65 ,
Bacteria , Proteobacteria , WP_010082070.1 hypothetical
protein [Wolbachia endosymbiont of Drosophila incompta]"
/translation="MQKNDIRAILRRKFIKKQQTNDRAVAPNILDQNFIVDQPNKVW
DYLHQNQGGMAIFGSNNSHVW"
/product="hypothetical protein"
/besthit="qcoverage 100 , hcoverage 100 , similarity 100
, identity 100 , evalue 1.88e-40 , alnlength 65 ,
Bacteria , Proteobacteria , WP_010082070.1 hypothetical
protein [Wolbachia endosymbiont of Drosophila incompta]"
gene 4098..4259
/locus_tag="wEsol_01025"
CDS 4098..4259
/locus_tag="wEsol_01025"
/codon_start=1
/transl_table=11
/fullproduct="qcoverage 100 , hcoverage 100 , similarity
100 , identity 100 , evalue 5.54e-28 , alnlength 53 ,
Bacteria , Proteobacteria , WP_010082071.1 MULTISPECIES:
hypothetical protein [Wolbachia]"
/cog="Tra5 COG2801 232 Transposase and inactivated
derivatives"
/pfam="rve"
/product="hypothetical protein"
/translation="MSSAINKQLVMNSLLMAINRRKPVKNLLHSDQGSQYTAQGYQY
LLAVKNIDE"
/besthit="qcoverage 100 , hcoverage 100 , similarity 100
, identity 100 , evalue 5.54e-28 , alnlength 53 ,
Bacteria , Proteobacteria , WP_010082071.1 MULTISPECIES:
hypothetical protein [Wolbachia]"
gene 4252..4416
/locus_tag="wEsol_01026"
CDS 4252..4416
/locus_tag="wEsol_01026"
/codon_start=1
/transl_table=11
/fullproduct="qcoverage 100 , hcoverage 100 , similarity
100 , identity 100 , evalue 2.14e-30 , alnlength 54 ,
Bacteria , Proteobacteria , WP_010082072.1 MULTISPECIES:
IS3 family transposase [Wolbachia]"

```

```

/cog="Tra5 COG2801 232 Transposase and inactivated
derivatives"
/pfam="rve_3 rve_2"
/product="IS3 family
transposase"
/translation="MSNKGCCYDNSVAESFFSSLKREILIDTSQHSAAQQTRTAIFEYI
EIFYNKQRHY"
/besthit="qcoverage 100 , hcoverage 100 , similarity 100
, identity 100 , evalue 2.14e-30 , alnlength 54 ,
Bacteria , Proteobacteria , WP_010082072.1 MULTISPECIES:
IS3 family transposase [Wolbachia]"
gene complement(4517..4786)
/locus_tag="wEsol_01027"
CDS complement(4517..4786)
/locus_tag="wEsol_01027"
/codon_start=1
/transl_table=11
/product="hypothetical protein"
/pfam="HlyD_2"
/translation="MISLQGLTANVRLPSGERFAYKIPSSALSLSDEGALGIKIVDDN
NYVVFAPIEIVDHESDGVWIVANNEDKPIKLIVLGHLFVKPGDKV"
/besthit="qcoverage 100 , hcoverage 47.0899470899471 ,
similarity 100 , identity 100 , evalue 2.81e-55 ,
alnlength 89 , Bacteria , Proteobacteria , WP_227738586.1
efflux RND transporter periplasmic adaptor subunit
[Wolbachia endosymbiont of Drosophila simulans]"
gene complement(4791..5597)
/locus_tag="wEsol_01028"
CDS complement(4791..5597)
/locus_tag="wEsol_01028"
/codon_start=1
/transl_table=11
/product="hypothetical protein"
/pfam="HlyD_2 HlyD Pfam-B_9764 Biotin_lipoyl
Biotin_lipoyl_2 HlyD Biotin_lipoyl_2 Biotin_lipoyl
HlyD_3"
/tigr="TIGR01730 RND_mfp 322 efflux transporter, RND
family, MFP subunit"
/translation="MQLFLTRLVNKFYCLKVRNKVIIISSIAFILLFFISSAFLKKDQ
AVHSDNATSSFSVKTQECAPQNRTIYLNFSGTVNPLHRASLVSKISGKIIAIYLPDGE
KVKRDDVVLKIEDYDRIEQAQKAKALLKQREIEYDSSHKLNNKGYGAQIQVEAFTAL
QSAKADLKRLELDLENTAVTSPIDGYIDKINANEGDFVNAGQKIADVNFQILVVLY
VSENEVSKIELGSTAQINLLDGKELAGEVSFISKIAEPKTGSYRVEVKVT"
/cog="AcrA COG0845 372 Membrane-fusion protein"
/besthit="qcoverage 100 , hcoverage 74.4444444444444 ,
similarity 100 , identity 100 , evalue 4.70e-176 ,
alnlength 268 , Bacteria , Proteobacteria ,
WP_174517006.1 MULTISPECIES: efflux RND transporter
periplasmic adaptor subunit [unclassified Wolbachia]"
gene complement(5807..6889)
/locus_tag="wEsol_01029"
CDS complement(5807..6889)
/locus_tag="wEsol_01029"
/codon_start=1
/transl_table=11
/fullproduct="qcoverage 100 , hcoverage 100 , similarity
100 , identity 100 , evalue 1.11e-260 , alnlength 360 ,
Bacteria , Proteobacteria , WP_006280480.1 MULTISPECIES:
Fic family protein [Wolbachia]"
/cog="COG3177 COG3177 348 Fic family protein"

```

```

/pfam="Fic Pfam-B_2040"
/product="Fic family
protein"
/translation="MNWKNFRLSTRNLNLEGPVIEQVYELITAVDSVKNSWQITKKLLP
QTIERLTHSVIVTSSGASNRIEGNRLTDKEVEDLYKNL RVKKFKNRDEQEIAGYLEML
TLIFHDYTDIPISESSILHINNQMLLYSEKDLYHRGKYKASSNRVEAKDQNGKVVGII
FDPTPPYLV RKEVQELIDWYHWSLNNKFHPLIIVANFVFEYLAIHPFQDNGRTRSRL
MTNLMMLLQQGYDFVSIVSHEKIIETNKLDYYLALNKTQSSWKS GKEDISPWLIFFLNV
LKTQANEAHYILERENT EYLLSRKQLFFWEWALSLADKEFSRKDAIEALGFPPRTVEA
ITKKLLGMKYLQRLGEGKATRYKVII"
/besthit="qcoverage 100 , hcoverage 100 , similarity 100
, identity 100 , eval ue 1.11e-260 , alnlength 360 ,
Bacteria , Proteobacteria , WP_006280480.1 MULTISPECIES:
Fic family protein [Wolbachia]"

```

# ORIGIN

```

1 ttagatggta caatatcaac cacaggatca gatgcaa atg aagaatttat caatctttta
61 agcgaaaatc tcagagagag gttattgggg tcaggagttg ctctagaaga tgaagatggt
121 gatgatattg ttgaagtcag agtatctacc gttatagatc tattgagtga ttatgctaaa
181 ttggaagata ataaagaaca cagagagtta ttaataagta aagtagcaga taatttagga
241 ctttccactc aagataaaac agcaccagaa gtattgatgg aattaggctc tttaccttct
301 ttgataaaag gtcagggttaa tcataatcaa gtgcagtctg ttgtaaatac ttttattaag
361 ttaattattg aagggaaaag cgaagtatac aaaaaaggag gtgcgattaa tgcaattcat
421 aaggagatag ataaggcaat tggttagcaa gaaaaaaaag caaccaacaa acaagatata
481 gaaaatgata aatggacaga tagaatcaaa aaacagaatt attctgcgga atcacatgaa
541 catttacctt aaagatatta gtaggctctt taaatat ttt agagttcatg gttgcaacgg
601 ttgctatttt acagcgcacc tcatcgtaaa aactacgtgc cgttgcatca tatgtttcaa
661 gaacgttggt aaaatgttca agttgatctc gattcaatac ctgatctatt ctagttagtt
721 ggtcattgct gcttttataa ttagtttagat cacataacat agcacgttct tcagtttcag
781 caggcaagta tttaaagtga ccaaagatat tttgccta at tttctctagc atattttacct
841 gtatacttac aaagctacct aataccgcat actgatttct ctcttttatct tatataaatt
901 aattaagtaa agtgaataca gtatccacac tactaaaaaa aatgtggcac aaaacataaa
961 cattgcaacc agtggaaca gcagggaact ttctattgct attccacctt ttctcaaaat
1021 gcttgctggc tgatggagag tggaccataa attcacggaa aattttacta taggaatatt
1081 tatagcacta aagatggcaa atactgctgc tgatttttct gccctcgctt cattatcaaa
1141 agcgctccac aatgaaaggt agccaacata taggaaaagt aaaatcagca ttgaagtaag
1201 tcttgcatcc catacccacc aagtgcacca ggttcctttt cccagatgc tgcctgtgat
1261 taaacatatt gccgaaaaga ttgtccctgc aggagcagca gcatgtgcca agacactagc
1321 aacgctattg ttccatacca atgaaatgaa actgagtgat gcaattaatc catatat tcc
1381 aagagcaagc catgcagaag gcacatgaat gtacatgatt cgtacaattt ctccttg ttt
1441 ataatcttct ggagagaaga ataacgcaa agacattcca attaaaaaac atgcgaaaca
1501 aataacccca agccaaggta gagctttctt agaaaaataa gagaaatttg taggcttta
1561 taaaaacatt cgtttttgaga ataattgtgt taagaattta ccaattagtt tgagttttat
1621 caacaggata gtttttctat atttacgtag gtcaacaaat tagcataatt tcagtagcag
1681 attgctagct attattttta gtatatgacc cttaaaaagc ttaatctaca cttagtatca
1741 gattcaagtg gtgaaactgt tatatcagtt gcaaaatcag ctctgaaaca ctttcgttct
1801 atagaaacga tcgaatatgt ttggtctttt gtgaaaaaag aggagcagat tgacaaaatt
1861 ctggaggaaa ttaataggaa aagtgatgag cataattttg ttatatgcac tattactgat
1921 gatgagctaa gaaaatattt aaaagataac tgtataaagt tgaaaattcc ctatagagca
1981 atattatcac atattattag agaaatttcg tcctatcttg aaattgaaaa agacgaaaag
2041 cttgacttgt atactgagat aaataacgaa tattttcagc gcattgaggc aataaactac
2101 actattaatc atgatgatgg acaaaatatt caagatattg ataaagcaga tataattttg
2161 gttggagttt cacgtacatc aaaatctccc accagtacgt atttagctta ccgaggctat
2221 aaagttgcaa atattccttt tgttagtggg gtaccctttt atgttgactt ggcaaaatta
2281 aaaaataaac taacgatagg ggtaacaata gacgtaagta ggctaataga aatacgcaaa
2341 aatagactta cttcaattaa caacgaagat aataatatat atgctaacc tgagaaagta
2401 gaaaaggaaa ttaaagaagc agaggagctc tttaaacaga ataactggcc aattatcgat
2461 gtcacgcaaa agtcgatcga agaagtatca gcaacaatta tacaatattt taataaaatg
2521 ttatcaattg actaactctt gataagtgat tataatgtaa agtaatttaa ttcttactat
2581 agatatgaaa gtcaaagggt cgctaaaatc tcatcgtaac agagataaaa attgtaaagt
2641 tgtgaaaagg ggtggttaaga tttacattat aaataaggta aagccaaggt gtaaagcgcg

```

|      |             |             |             |             |             |             |
|------|-------------|-------------|-------------|-------------|-------------|-------------|
| 2701 | tcaaggttct  | tagctttttg  | ttcacctttt  | catgttatat  | atTTTTtata  | tgtgaaagta  |
| 2761 | cgggtgcttat | atctaaaaag  | aagcaaaagt  | tactgtgttt  | aagcgcagcc  | ttactcattt  |
| 2821 | cttcccttac  | atttatatttc | agcattagca  | caattacagg  | taaacgtggc  | ttattgacgt  |
| 2881 | taatcgattt  | aaaaaaagaa  | atcgagtaca  | ataaactttt  | gctaaaggat  | gtctcttctg  |
| 2941 | aaaaggaaaa  | gttggaacaac | aaagtattttg | gcttatatga  | aaaaagctta  | gatttagatc  |
| 3001 | tgcttgatga  | gcaagcaaaa  | aatgcttttag | gttatgtgaa  | ccctaataaa  | cttatggttg  |
| 3061 | ttcttgacgt  | gaaatagcag  | tagagatctc  | cctacgtcat  | accgccgcgg  | cgctaacacg  |
| 3121 | tagcgggatg  | acgggtttttc | aaattgtcgg  | taaatctaag  | tcagtttagc  | tatatgtctc  |
| 3181 | ctcacaccgc  | ttagctgaac  | agacaatggc  | atcaacttaa  | ggaaaaatgt  | cagcgatagt  |
| 3241 | gtataaaatt  | tctctctaaa  | atTTTTtacca | ttaaattacc  | caaaagctgc  | atgaccttac  |
| 3301 | ccagaaaaag  | tggagagaaa  | gaaaggagtt  | ttttcgggta  | aaataaaaatt | ttggaggatt  |
| 3361 | agaaatggta  | agagaatata  | cagcagaatt  | caaattggaa  | gctgttaaac  | tggcaaataa  |
| 3421 | acaaagaaag  | gcaggtcaaa  | caattacaaa  | aatagcaaa   | gatttaggaa  | taaagggtgg  |
| 3481 | tttattagga  | aaatggataa  | agaaacacaa  | cgaaaaaaag  | tcggcagcag  | atgcatttcc  |
| 3541 | aggtagaggt  | aacatggctc  | cttacgacaa  | agagaggttt  | gatttacaaa  | gcaagagtaa  |
| 3601 | caagggaaag  | agacatttaa  | aaaaaagccc  | tggccagtca  | aaaagagtaa  | aataattttt  |
| 3661 | tataaaagag  | catagtaact  | gctataaagt  | acaggaatta  | tgtaggattt  | tctgctagt   |
| 3721 | gctactataa  | gtggaccaca  | agaaaaataa  | gcagtagaga  | atcagcaaat  | aaagagttat  |
| 3781 | tagcagatat  | tcaaaaaata  | tatcaagttt  | ctaaatgtag  | atatggagct  | cctaaaattc  |
| 3841 | atgctgaatt  | gaaggctttg  | ggtaaaagtt  | gcaatttgaa  | aacggtgcaa  | agtattatgc  |
| 3901 | agaaaaatga  | catcagggct  | atactgagaa  | gaaagttaa   | aattaaaaaa  | caacaaacag  |
| 3961 | ataatagagc  | tgtagctccc  | aataactag   | atcaaaaactt | tattgttgat  | caaccaaata  |
| 4021 | aagtatggga  | ttactttacat | caaaaccaag  | gagggatggc  | tatatattggc | agcaataatt  |
| 4081 | ctcacgtatg  | gtagttaatg  | agtagtgcaa  | taaataaaca  | attgggttatg | aactctttat  |
| 4141 | taatggccat  | taataggcgt  | aaacctgtta  | aaaatctact  | gctgcacagt  | gaccaagggt  |
| 4201 | cacaatatat  | tgcgcaaggg  | tatcaatatc  | tcttagctgt  | aaagaatata  | gatgagtaat  |
| 4261 | aaaggctgtt  | gttacgacaa  | ttctgttgca  | gaaagcttct  | ttagctcatt  | gaaaagagaa  |
| 4321 | atacttattg  | atacttcaca  | acactctgct  | caacaaacta  | gaactgcaat  | atttgaatac  |
| 4381 | atagaaat    | tttataacaa  | acaacgtcac  | tattaactat  | tgcgttccag  | aacaatttga  |
| 4441 | tgcattcattc | tttttgtaaa  | aaacattcca  | cacttttctc  | ccactttttc  | tgggttaagg  |
| 4501 | caaaggatct  | tatgtcttaa  | accttatcac  | caggcttaac  | aaatagggtg  | cccaataacta |
| 4561 | ttaactttat  | gggttttatct | tcgttatattg | ctactatcca  | aaccccatcg  | ctctcatgat  |
| 4621 | caacaatttc  | tattggtgca  | aatactacat  | aattattgtc  | atcaacaatc  | tttattccaa  |
| 4681 | gagcaccctc  | gtcacttaag  | ctcagggctg  | agaaggaat   | tttatatgca  | aatctttcgc  |
| 4741 | ctgaaggtag  | tcttacgttg  | gcagttaatc  | cctgcaagga  | tatcattttta | ttatgttacc  |
| 4801 | tttacctcta  | ccctataaga  | cccagtttta  | ggctcagcaa  | ttttactaat  | aaaacttact  |
| 4861 | tcacctgcca  | attctttttcc | gtccagtaaa  | ttaatTTtgag | ctgtgctgcc  | tagctctatt  |
| 4921 | ttacttactt  | catttttccga | aacgtataac  | accacaagaa  | tttgatcgaa  | attaaccacg  |
| 4981 | tcagctat    | tttgcccagc  | attaacaaaa  | tccccttcgt  | ttgcattgat  | tttatcaata  |
| 5041 | taaccatcta  | taggagatgt  | gactgcagta  | ttttctaaat  | ccaattctag  | ccttttttagg |
| 5101 | tcagctttttg | cacttttgtaa | cgcagtaaaa  | gctgcttcta  | cttgattttg  | tgccccatag  |
| 5161 | cctttttttat | tcagtttggtg | agaggaatca  | tactcaattt  | cacgctgctt  | taataaagct  |
| 5221 | ttggcttttct | gagcttgctc  | aatcctgtca  | taatcttcta  | tctttaacac  | tacatcatct  |
| 5281 | cttttttacct | tttcaccatc  | aggtaaataa  | atagcaataa  | tcttaccact  | tatttttgag  |
| 5341 | acaaggctag  | ctctatgtaa  | gggattttact | gtaccagaaa  | aattttaaata | tatagtgcgg  |
| 5401 | ttttgcggcg  | cacattcttg  | agtttttact  | gaaaagctac  | tagttgcatt  | atcgctatga  |
| 5461 | accgcctgat  | cttttttttaa | aaatgcactg  | ctgataaaaa  | acagtagaat  | aaaagcaata  |
| 5521 | ctggaaatga  | tgattacttt  | gtttctcacc  | tttaaacaat  | agaatttggt  | gaccaatctt  |
| 5581 | gttagaaaaca | actgcataaa  | ttttcgaatc  | agaaatgtaa  | gtataatata  | tgtaccattg  |
| 5641 | tactccata   | aatagtttta  | tatgagaaca  | aacacaagat  | tttcctacaa  | taagtaagtt  |
| 5701 | ttttattgct  | aaaatgcaat  | ttttaatcga  | ataaaaaatgt | aaaattgcaa  | acaaagttgt  |
| 5761 | gcataagact  | ggatttaaaa  | aatccttgaa  | aaatatacta  | aaacttttaa  | ataataactt  |
| 5821 | tatatctagt  | ggctttgcct  | tctccaagac  | gctgtaagta  | tttcatccct  | agcagtttct  |
| 5881 | ttgtaattgc  | ctctactgtt  | cttgaggaa   | atcctagagc  | ttctatagca  | tcttttctac  |
| 5941 | taaattcttt  | atctgcaagg  | ctaagtgcc   | attcccagaa  | gaacaattgt  | tttcttgata  |
| 6001 | ataaatattc  | agtattctcc  | ctctcaagaa  | tataatgcgc  | ctcatttgct  | tgcgttttga  |
| 6061 | gtacattaag  | aaaaaatatt  | aaccacgggg  | aaatatcttc  | tttgccactt  | ttccagctac  |
| 6121 | tttgtgtttt  | attaagcgct  | aagtagtaat  | caagtttggt  | agtttcaatt  | atcttttcat  |
| 6181 | gtgatacaat  | agatacaaaa  | tcataaccct  | gctgcaacag  | cattaaatta  | gtcatcaatc  |
| 6241 | tactagttct  | gccattttcca | tcttgaaaag  | ggtgtattgc  | cagataactca | aaaacaaagt  |

```

6301 tagcaacaat aataagagga tgcttaaatt tattatttaa ggaccagtga taccaatcaa
6361 taagctcttg tacttccttt ctaacaaggt aaggtggtgt gggatcaaaa attataccaa
6421 caacttttcc attctgatct tttgcctcaa ctctattaga acttgctttg tattttcctc
6481 tatgatacaa atctttttca ctataaagta gcatctggtt gttaatgtgc aatattgatg
6541 actcactaat tggaatatcc gtataatcat gaaatattag tgtaagcatt tctaagtagc
6601 cagcaatttc ttgctcatct ctatttttaa attttttgac acgtagggtt ttatatagat
6661 cctcaacttc tttatcgggt agacgatttc cttcaatacg gttagaagcg ccagaagatg
6721 taacaataac tgaatgagtt aatctttcaa ttgtttgtgg tagtagtttt ttcgttatct
6781 gccagctatt tttaacacta tcaactgcag taattaactc gtacacttgt tcaattacag
6841 gcccttctag gttgagacgt gtactaagac gaaaattctt ccagttcata ttcttctcac
6901 atgcatatta tgtgagataa tgtgagataa tgtgataaaa gtcaatagta agctttatat
6961 gcatagcag

```

//

```

LOCUS      JAQZAU010000092      7966 bp      dna      linear      ENV 17-MAR-2023
DEFINITION MAG: Wolbachia pipientis isolate wEsol contig_46807, whole genome
            shotgun sequence.
ACCESSION  JAQZAU010000092  JAQZAU010000000
VERSION    JAQZAU010000092.1
DBLINK     BioProject: PRJNA929258
            BioSample: SAMN33142973
KEYWORDS   WGS; ENV; Metagenome Assembled Genome; MAG.
SOURCE     Wolbachia pipientis (insect metagenome)
ORGANISM   Wolbachia pipientis
            Bacteria; Pseudomonadota; Alphaproteobacteria; Rickettsiales;
            Anaplasmataceae; Wolbachieae; Wolbachia.
REFERENCE  1  (bases 1 to 7966)
AUTHORS    Fiutek,N., Couger,B.M., Roy,S., de la Torre,J.R. and Connor,E.F.
TITLE      Genomic assessment of the contribution of the Wolbachia
            endosymbiont of Eurosta solidaginis to gall-induction
JOURNAL     International Journal Molecular Sciences
REFERENCE  2  (bases 1 to 7966)
AUTHORS    Fiutek,N., Couger,B.M., Roy,S., de la Torre,J.R. and Connor,E.F.
TITLE      Direct Submission
JOURNAL     Submitted (10-FEB-2023) Biology, San Francisco State University,
            1600 Holloway Ave, San Francisco, CA 94132, USA
COMMENT     ##Genome-Assembly-Data-START##
            Assembly Date      :: JUN-2019
            Assembly Method    :: FLYE v. 06-2019
            Genome Representation :: Full
            Expected Final Version :: Yes
            Genome Coverage    :: 100.0x
            Sequencing Technology :: Illumina HiSeq; PacBio Sequel
            ##Genome-Assembly-Data-END##
FEATURES   Location/Qualifiers
            source              1..7966
                                /organism="Wolbachia pipientis"
                                /mol_type="genomic DNA"
                                /submitter_seqid="contig_46807"
                                /isolate="wEsol"
                                /isolation_source="galls on Solidago altissima"
                                /host="Eurosta solidaginis MN-2018-EFC"
                                /db_xref="taxon:955"
                                /environmental_sample
                                /country="USA: Cowling Arboretum, Carleton College,
                                Northfield, MN"
                                /lat_lon="44.48 N 93.13 W"
                                /altitude="280 m"
                                /collection_date="2018-11"
                                /metagenome_source="insect metagenome"
                                /note="metagenomic"

```

```

gene      60..986
          /locus_tag="wEsol_01030"
CDS       60..986
          /locus_tag="wEsol_01030"
          /codon_start=1
          /transl_table=11
          /fullproduct="qcoverage 100 , hcoverage 100 , similarity
99.4 , identity 99.0 , evalue 2.14e-225 , alnlength 308 ,
Bacteria , Proteobacteria , WP_155968772.1 MULTISPECIES:
hypothetical protein [Wolbachia]"
          /translation="MVASDSVLKRYALAYIKKLGNNNNNIEGFLQYCNNTPNLTWSKEN
FKNVYEEFTHPNSSNRHDTGSRNDQYNAGNNAQPTGSQTTHIHVYNDRLDFWDYLLL
RSLFGGHTTVINNPGFSSGSHQSREDKKKDESDNRKLLALGMVAAVVCVAFHAGMCFW
YNSSRKVARKEEKIDYLDSEKFKTFRNIEFAVGAVSLAALVACAVYPVLPVWGLVILGV
NSLVCFTGGLAFHMKHEESENIEKAKGAVDSCLRQGHGYGDSSRYDAPPPYFSQDPN
TTPTAPPCSEFDNSNAKWQSENCEGFTYDRNQ"
          /product="hypothetical protein"
          /besthit="qcoverage 100 , hcoverage 100 , similarity 99.4
, identity 99.0 , evalue 2.14e-225 , alnlength 308 ,
Bacteria , Proteobacteria , WP_155968772.1 MULTISPECIES:
hypothetical protein [Wolbachia]"

gene      1210..2343
          /locus_tag="wEsol_01031"
CDS       1210..2343
          /locus_tag="wEsol_01031"
          /codon_start=1
          /transl_table=11
          /fullproduct="qcoverage 100 , hcoverage 100 , similarity
99.7 , identity 99.5 , evalue 8.78e-230 , alnlength 377 ,
Bacteria , Proteobacteria , WP_197907113.1 molecular
chaperone DnaJ [Wolbachia endosymbiont of Kradibia
gibbosae]"
          /cog="DnaJ COG0484 371 DnaJ-class molecular chaperone
with C-terminal Zn finger domain"
          /pfam="DnaJ DnaJ_CXXCXGXG DnaJ_C DnaJ_C"
          /tigr="TIGR02349 DnaJ_bact 354 chaperone protein DnaJ"
          /product="molecular chaperone DnaJ"
          /translation="MSKKDYYELLEVGGRNASIDEIKKAYKKLALKYHPDRNPGNQEAE
EKFKEVTAAYEVLSDSEKRAGYDRYGHEGASGGFQGFSSAGDFSDIFNDFGGGFGGG
ASRSRAKRSTTGVSGADLRYDLEITLEDADFQGIQAPIHYVTNVKCDTCQGTGGEGAIAK
PVQCHTCQGSGRIRTQQGFFTIERCTCTCYGEGEIIQNKCKKCGGSGRRRDEVNISVS
IPKGIEEGAKVRISGKGEAGTKGGKSGDLVYVKIIFHKIFARNKADLHCKVPIRMTL
AVLGGEIDIQSIDGAKIKVKVPEGTQTGTKLRCREKGMPPYMNSHARGDLVQVIVETL
NPKNLTKKQIELLKALEEEENASVQQQSEGFFSKVKKNKKS"
          /besthit="qcoverage 100 , hcoverage 100 , similarity 99.7
, identity 99.5 , evalue 8.78e-230 , alnlength 377 ,
Bacteria , Proteobacteria , WP_197907113.1 molecular
chaperone DnaJ [Wolbachia endosymbiont of Kradibia
gibbosae]"

gene      2626..4293
          /locus_tag="wEsol_01032"
CDS       2626..4293
          /locus_tag="wEsol_01032"
          /codon_start=1
          /transl_table=11
          /fullproduct="qcoverage 100 , hcoverage 100 , similarity
99.6 , identity 99.6 , evalue 0.0 , alnlength 555 ,
Bacteria , Proteobacteria , CDR78433.1
metallo-beta-lactamase family protein,Ribonuclease J
1,metal-dependent hydrolase,Predicted metal-dependent

```

RNase, consists of a metallo-beta-lactamase domain and an RNA-binding KH domain, conserved hypothetical protein, Metallo-beta-lactamase superfamily [Wolbachia endosymbiont of Drosophila simulans wAu]"  
 /cog="COG0595 COG0595 555 mRNA degradation ribonucleases J1/J2 (metallo-beta-lactamase superfamily)"  
 /pfam="Lactamase\_B Lactamase\_B\_2 RMMBL"  
 /tigr="TIGR00649 MG423 546 conserved hypothetical protein"  
 /product="metallo-beta-lactamase family protein, Ribonuclease J 1, metal-dependent hydrolase, Predicted metal-dependent RNase, consists of a metallo-beta-lactamase domain and an RNA-binding KH domain, conserved hypothetical protein, Metallo-beta-lactamase superfamily"  
 /translation="MLFSGFNNLNLNMNINKNEFLFLPLGGVGRIGMNVSLYHYQGKWI MIDLGVGFADETM PGVELLIADIDFIAQRKKDLLGIIITHAHEDHCGAVPHLWEELQC SIYTTKFTVNFLEKLEKEFRLEGIVPVKEVDINGSINLGPFTVEFINVTHSIPEANSI LISTEMGSALHTGDWKFDKPKVVGLTSNMERLKEIGDKGDLAAICDSTNLSKHHPE SEGEIYNNIYNI IKRSKKLVAVSLFASN VARIETISQA AKALNRKVLLGRSLWRIVK VAQDSGYLTDSPQFLEAKEAVNFPREELVLLCTGCQGEPLAATARLAAKSHQAFKMQQ GDTMIFSSKIIPGNETRAHNMLNAFIEMGVEVITEKTEHVHASGHPTREELKEMYSLI KPKMSIPVHGEYIHTAHVKAFAKECGVAKAIMITPGDIVNLENGEKVDSIDVDYFGID GMLLRHPESVVIKMRKMRDAGVIVVTAVVNKKNKLLAKPKVFVPGVFEVLEDAATIO KIVKKVESLFSLQPTKKIKNKIESSILSILKEYLLKRPIIEVQIEQV"  
 /besthit="qcoverage 100 , hcoverage 100 , similarity 99.6 , identity 99.6 , evalue 0.0 , alnlength 555 , Bacteria , Proteobacteria , CDR78433.1 metallo-beta-lactamase family protein, Ribonuclease J 1, metal-dependent hydrolase, Predicted metal-dependent RNase, consists of a metallo-beta-lactamase domain and an RNA-binding KH domain, conserved hypothetical protein, Metallo-beta-lactamase superfamily [Wolbachia endosymbiont of Drosophila simulans wAu]"  
 gene 4299..5561  
 /locus\_tag="wEsol\_01033"  
 CDS 4299..5561  
 /locus\_tag="wEsol\_01033"  
 /codon\_start=1  
 /transl\_table=11  
 /fullproduct="qcoverage 100 , hcoverage 100 , similarity 100 , identity 100 , evalue 1.92e-227 , alnlength 420 , Bacteria , Proteobacteria , WP\_151807700.1 Tol-Pal system protein TolB [Wolbachia endosymbiont of Nasonia oneida]"  
 /cog="TolB COG0823 425 Periplasmic component of the Tol biopolymer transport system"  
 /pfam="TolB\_N Pfam-B\_17132 Pfam-B\_9852 PD40 Pfam-B\_16340 PD40 Pfam-B\_3367 PD40 Peptidase\_S9\_N PD40 PD40"  
 /tigr="TIGR02800 propeller\_TolB 418 Tol-Pal system beta propeller repeat protein TolB"  
 /product="Tol-Pal system protein TolB"  
 /translation="MKLFVHLVLFISLFIPIYFTKAALYVDIKKSSVGNIGLVVSKCTC KTALESELS ENIAKVIGTNL SNCGLFNVKRGAEAESKSWKSDTVVTVSLSEISGSALE LSFRLFDFTFKRELLTQSVVFPKADWRKIGHLVSDVIHDLRIGEKGHFN TKITYIAEE KDSNYKSVRKIAVMNQDGSNIKYL TNGDRFVSTPRFSPNGKGIVYISYANGKSYIILK NLKDNTESIISAFEGVVSAPRFSPDGKSL LISHSLGGETNLSLDLSSKRTKKITKGS AISTSPSFSPDQKYMAFSSDISGSQQLYVIDFTNKS KKPKRISFGSGRYATPVWSPKG DLIAFTKIQSGKFYIGVMKPDGKEERLLSEGHKIESPAWL PNGREIIFTRTESPSNSK LYLVDLVKKNQKMVSTPTNASLPDWSYF"  
 /besthit="qcoverage 100 , hcoverage 100 , similarity 100

```

, identity 100 , evalue 1.92e-227 , alnlength 420 ,
Bacteria , Proteobacteria , WP_151807700.1 Tol-Pal system
protein TolB [Wolbachia endosymbiont of Nasonia oneida]"
gene complement(5603..5956)
/locus_tag="wEsol_01034"
CDS complement(5603..5956)
/locus_tag="wEsol_01034"
/codon_start=1
/transl_table=11
/fullproduct="qcoverage 100 , hcoverage 100 , similarity
100 , identity 100 , evalue 3.30e-76 , alnlength 117 ,
Bacteria , Proteobacteria , WP_015588776.1 MULTISPECIES:
Asp-tRNA(Asn)/Glu-tRNA(Gln) amidotransferase subunit GatC
[Wolbachia]"
/cog="GatC COG0721 96 Asp-tRNAAsn/Glu-tRNAGln
amidotransferase C subunit"
/pfam="Glu-tRNAGln"
/tigr="TIGR00135 gatC 93 aspartyl/glutamyl-tRNA(Asn/Gln)
amidotransferase, C subunit"
/product="
Asp-tRNA(Asn)/Glu-tRNA(Gln) amidotransferase subunit
GatC"
/translation="MPAKSTEDVITSLIEFANKRKITITKEEMLKIAQLVRIKLSNDE
IDHYSKELTMLDWIHDITLLQVNTTEGVSPMRYSIDKDIHVRDDVINSQNIKKEILSNT
KPEHGYFVVPKVISD"
/besthit="qcoverage 100 , hcoverage 100 , similarity 100
, identity 100 , evalue 3.30e-76 , alnlength 117 ,
Bacteria , Proteobacteria , WP_015588776.1 MULTISPECIES:
Asp-tRNA(Asn)/Glu-tRNA(Gln) amidotransferase subunit GatC
[Wolbachia]"
gene complement(5946..6872)
/locus_tag="wEsol_01035"
CDS complement(5946..6872)
/locus_tag="wEsol_01035"
/codon_start=1
/transl_table=11
/fullproduct="qcoverage 100 , hcoverage 100 , similarity
100 , identity 100 , evalue 7.56e-210 , alnlength 308 ,
Bacteria , Proteobacteria , WP_015588775.1 MULTISPECIES:
ribose-phosphate diphosphokinase [unclassified
Wolbachia]"
/cog="PrsA COG0462 314 Phosphoribosylpyrophosphate
synthetase"
/pfam="Pribo syltran_N Pribo syltran"
/tigr="TIGR01251 ribP_PPkin 309 ribose-phosphate
diphosphokinase"
/product="ribose-phosphate
diphosphokinase"
/translation="MKIIIGNASKELGESVVRDLVQPSSAWISKFTDGEVNVEVAND
LYNQEVYIVQSLSPPVNDNLMELLLIIDA VNR LGAKRIVV IIPYYGYSRQDRIKNNN
MQSALS AKLVANLIQTAGASSVAVIDLHSSQIEGFFDVPVTNLNCFEAFVDSINTENL
AIVAPDVGAIGRRARAFARALEEKYKIGLSDKIIVVDKYREKAGTSQVMNIIGEVANKN
CVIVDDIVDSGGTLCNAALALKSYGAKSVTSCITHGVLGSGSAVEKISSSSLDKLVITD
TILHKLEKTGKIEVSVVNILTHFIQGG RNAS"
/besthit="qcoverage 100 , hcoverage 100 , similarity 100
, identity 100 , evalue 7.56e-210 , alnlength 308 ,
Bacteria , Proteobacteria , WP_015588775.1 MULTISPECIES:
ribose-phosphate diphosphokinase [unclassified
Wolbachia]"
gene complement(7176..>7966)

```

CDS

```

/locus_tag="wEsol_01036"
complement(7176..>7966)
/locus_tag="wEsol_01036"
/codon_start=1
/transl_table=11
/pfam="Ank_2 Ank_5 Ank_3 Ank_4 Ank Pfam-B_1714 Ank Ank_3
Pfam-B_10896 Ank_4 Ank_5 Ank_2 Ank Ank_3 Ank_4 Ank Ank_3
Ank_4 Ank_2 Ank_4 Ank_2 Ank"
/fullproduct="qcoverage 100 , hcoverage 90.9722222222222
, similarity 91.2 , identity 91.2 , evaluate 1.14e-139 ,
alnlength 262 , Bacteria , Proteobacteria ,
WP_209473165.1 ankyrin repeat domain-containing protein
[Wolbachia endosymbiont of Wiebesia pumilae]"
/translation="LIKCGTNVNDHYERNRTPHIAIGRKQLEIAKLLIKNGANVNAK
TQNHGKDDLTPMHFAVFANTPEFIELLASHGALINERESTEGYTPLHFAALYGNKNII
QALIDKGQDIEDVDNNGRTALFLAARQCTEAEDDSRIEIIKYLIKADVTCKDNNN
NAVLFPAAANNCPGKVVEFIIIEQYIKIFELENFINHKNNDGMDALDIALNSGNEKAIEV
LRSYGADIKNKVDGSIQKITAEKPSSTLDRAESA EVAPPIKQRV"
/product="ankyrin repeat domain-containing
protein"
/besthit="qcoverage 100 , hcoverage 90.9722222222222 ,
similarity 91.2 , identity 91.2 , evaluate 1.14e-139 ,
alnlength 262 , Bacteria , Proteobacteria ,
WP_209473165.1 ankyrin repeat domain-containing protein
[Wolbachia endosymbiont of Wiebesia pumilae]"

```

gene 1050..1127

tRNA

```

/locus_tag="wEsol_tRNA-18"
1050..1127
/locus_tag="wEsol_tRNA-18"
/gene="tRNA-Arg"
/intronpos="0..0"
/program="tRNAscan-SE"
/cove_score="75.8"
/evidence=predicted
/type="Arg"
/anticodon=ACG
/product="tRNA-Arg (ACG)"

```

#### ORIGIN

```

1 agatgttatac ttgttataat aaatatattat taattttaatc ttaacttaag aggggtattta
61 tggtagcaag tgatagtgtt ttaaaaagggt atgcggttagc ctatataaag aaattaggtta
121 ataataataa tattgaagggt tttctacagt attgtaataa tacaccgaat ttaacttgga
181 gcaaggagaa ttttaaaaat gtgtatgaag aattttacaca tccaaattca agcaataggc
241 acgatacagg aagcagaaat gatcaatata acgcagggaa taacgcacaa cctacaggct
301 ctgagactac acatatacat gtataacaatg atagagggtt agattttttgg gattattttac
361 tacttcgcag cctgttttgt ggtcatacta cagttataaa taaccctggg ttcagtagtg
421 gtagccatca aagcagagaa gataagaaaa aagactcaga agacaataga aagttattag
481 ctttaggtat ggtagctgca gttgtgtgtg ttgctttcca tgctggtatg tgtttttggg
541 ataacagcag cagaaaagtgt gctagaaaag aagaaaaaat agattacctg gatagtaa
601 ttaaaacgtt cagaaatata gaatttgcgg ttggcgctgt ttctttggca gctttggtag
661 cttgtgctgt ttaccagtc ttaccagtgt ggggttttagt tatccttggc gttaattctc
721 ttgtgtgttt tactggttgt ttagcttttc atatgaagca tgaggaagaa tcagaaaata
781 tcgagaaagc taaaggagcg gtagatagct gtcttagaca agggcatggt tatggagatt
841 cttctcgtaa tgatgcacca cctccttact tttctcaaga tcctaatact actccaactg
901 ctctctcttg tagtgaattt gataattcta atgcgaaatg gcagtctgag aattgtgagg
961 ggttcacgta tgatagaaat caatagtttt attttttagcc aaattaattg aatcaagcca
1021 caaaatctgc taaagttaac tttatgaaag cacccttagc tcagttggat tagagcattt
1081 gactacggat caaaagggtcg ggcgttcaag tcgctcaggg tgcaccacat tttataggaa
1141 gcagaagtca cacttgaaat taatatatgc aatacctatc tttaaagggt aagcactaaa
1201 ctattatata tgagcaaaaa agactactat gagctactgg aagtaggcag aaatgccagt
1261 attgatgaga taaaaaaagc gtataaaaaa ttagcggttaa aatatcatcc tgatagaaat

```

|      |             |             |            |             |             |             |
|------|-------------|-------------|------------|-------------|-------------|-------------|
| 1321 | cctggcaatc  | aagaagcaga  | ggaaaaat   | aaagaagtaa  | cagctgcata  | tgaagttctg  |
| 1381 | tctgactctg  | agaaaagggc  | aggctatgac | cgttatggcc  | acgaaggtgc  | ttctggtgga  |
| 1441 | tttcaaggct  | ttagctctgc  | aggagat    | agcgacatat  | tcaatgactt  | ctttggtgga  |
| 1501 | ggattcgggtg | gtggtgcaag  | tagatcaaga | gcaaaaagaa  | gtacaacagg  | agtatctgga  |
| 1561 | gcagacctac  | gttatgatct  | tgaattacc  | ttagaagatg  | catttaaagg  | aatacaagcg  |
| 1621 | cctatacatt  | atgtgacaaa  | tgtaaaatgt | gatacatgcc  | aaggcacagg  | tggcgaagga  |
| 1681 | gcaattaaac  | cagttcagtg  | ccacacatgc | cagggaagcg  | gtaggattag  | aactcaacaa  |
| 1741 | ggctttttta  | ccatcgaaag  | aacatgtact | acatgctatg  | gggaaggaga  | aataatacaa  |
| 1801 | aacaaatgta  | agaaatgtgg  | tggaaagtga | cgtagaagag  | atgaagtaaa  | tatatccgtt  |
| 1861 | tcaattccaa  | aaggcataga  | agaaggagct | aaggtaagga  | taagtggtaa  | aggagaagct  |
| 1921 | ggaacaaaag  | gtggaaaaag  | tggagattta | tacgtatacg  | tgaaaataat  | tttccataaa  |
| 1981 | atcttttgcta | gaaataaagc  | agatttacac | tgtaaaagtgc | ctataagaat  | gacactagca  |
| 2041 | gtgcttggtg  | gtgaaatcga  | tattcaatca | attgatggag  | ctaaaataaa  | agtaaaggctc |
| 2101 | cctgaaggca  | ctcaaaactgg | taccaaacta | cgttgtaggg  | aaaaggggat  | gccatatatg  |
| 2161 | aactcacatg  | ctcgtggtga  | tttatacgta | caggtaatag  | ttgagacttt  | aaatccaaaa  |
| 2221 | aatttaacta  | aaaagcaa    | tgaactatta | aaagcgcttg  | aagaagagga  | aatgcaagt   |
| 2281 | gtacaacagc  | aatctgaagg  | gttttttagt | aaagtaaaaa  | aaaataagaa  | atctgctaaa  |
| 2341 | tgacataaag  | gggtaactgt  | ttacgggttt | tcatttaatc  | ctgcaatttt  | ttgatctcac  |
| 2401 | tcattgaaaa  | cttaacaata  | attagccaat | agaaacttct  | tagctcctta  | tagccaaagt  |
| 2461 | ggcttaggtt  | tacctacaat  | ttgaaaaaca | acaaattcgt  | cattccgcta  | ctcgttagcg  |
| 2521 | gaatctatac  | cgcgaataaa  | tcgcggtatg | acgttgggaa  | acctttcttg  | ggtagctat   |
| 2581 | aaaactatgt  | aaaagcaata  | aatttcttta | tttaagggtcg | aagttttgct  | attctcaggt  |
| 2641 | tttaataatt  | taaattta    | gaatataaac | aaaaatgagt  | ttttatttct  | tccgcttggg  |
| 2701 | ggagtaggaa  | gaatcgggat  | gaatgttagc | ctatatcatt  | accaaggtaa  | gtggattatg  |
| 2761 | atcgaccttg  | gtgttggttt  | tgcagatgaa | actatgccag  | gtgttgagct  | gctcattgct  |
| 2821 | gatatagatt  | ttattgctca  | aagaaaaaaa | gatttacttg  | gaataataat  | tacacatgca  |
| 2881 | catgaggacc  | actgcggtgc  | agtgcaccac | ttgtgggaag  | agttgcagtg  | ctccatatat  |
| 2941 | acaacaaagt  | ttacggttaa  | ttttcttaaa | gaaaaactaa  | aagaatttcg  | attggaaggt  |
| 3001 | atagtgcctg  | taaaagaggt  | agacataaat | ggcagcataa  | atgtgggtcc  | ttttaccgtc  |
| 3061 | gagtttataa  | atgtaactca  | ttcaattcct | gaggcaaatt  | caatattaat  | tagcactgaa  |
| 3121 | atgggtagtg  | cactccatac  | cggagactgg | aaatttgatc  | caaacctgt   | tgttggtatta |
| 3181 | acttctaata  | tggagcgtct  | aaaagaaatt | ggcgataaag  | gtgacctgct  | tgcagcaatt  |
| 3241 | tgcgattcaa  | ccaatatatt  | aagcaagcat | caccctgagt  | cagaaggtga  | aatttataat  |
| 3301 | aatatttata  | acataataaa  | gcggtctaaa | aaattagttg  | ctgtttcgct  | attcgcttca  |
| 3361 | aatgtggcac  | gaattgaaac  | gataagccaa | gctgcaaaag  | cactaaatag  | aaaagtagtt  |
| 3421 | ttacttggtg  | gatctttatg  | gagaatagtg | aaagttgcgc  | aagatagtg   | ttatttaact  |
| 3481 | gattctcctc  | agtttcttga  | agcaaaggaa | gcagtaaatt  | ttccaaggga  | agaactgggtg |
| 3541 | ctactttgca  | caggttgtca  | aggtgagcca | ctggcagcta  | ccgcaagact  | tgctgctaag  |
| 3601 | agtcacaaag  | cattttaa    | gcagcaaggt | gataccatga  | tcttttcgtc  | aaaaatcatt  |
| 3661 | cctggaaatg  | aaactcgtgc  | gcacaacatg | ctcaatgcct  | ttattgagat  | gggggtagaa  |
| 3721 | gttattactg  | aaaaaacaga  | gcatgttcat | gcttctgggc  | atccaacaag  | agaagagcta  |
| 3781 | aaggaaatgt  | attcttta    | aaaaccgaag | atgtctattc  | cagttcacgg  | cgaatatatt  |
| 3841 | cacacgcatg  | cacatgtaaa  | atttgctaaa | gagtgcggtg  | tggcaaaggc  | aataatgatt  |
| 3901 | acaccaggtg  | atattgttaa  | tttggagaac | ggagaaaaag  | ttgattcaat  | tgatgttgac  |
| 3961 | tacttttggtg | ttgatgggat  | gctgctacgt | catccggaga  | gcagtgttat  | aaaaatgcgt  |
| 4021 | aaaaggatga  | gagatgccgg  | agttattgtg | gtaacagcag  | ttgtaacaaa  | gaaaaataaa  |
| 4081 | ttgcttgcta  | aaccaaag    | atttgtaact | ggtgtttttg  | aagtgtctaga | agatgcagct  |
| 4141 | accatacaga  | aaattgtcaa  | gaaagttgag | tcgttggtta  | gtttgcagcc  | aacaaaaaaa  |
| 4201 | attaaaaata  | agattgaaag  | ttcaatattg | agtatcttaa  | aggaatat    | actaaaaagg  |
| 4261 | cctataattg  | aggttcagat  | agaacaggta | tgaaatgaat  | gaagctattc  | gttcatctgg  |
| 4321 | tgttatttat  | ttcgttattt  | attccttatt | ttacaaaagc  | tgctttatat  | gttgatataa  |
| 4381 | aaaaaagcag  | tgttggtaac  | attggtcctg | ttgtatctaa  | atgtacatgt  | aaaacagcgt  |
| 4441 | tggaaagcga  | attaagcgaa  | aatattgcaa | aggtaatagg  | aacaaattta  | tctaattgtg  |
| 4501 | gcttatttta  | tgtaaaacgt  | ggcgcggaag | ctgaatctaa  | atcttggaaa  | agcgatactg  |
| 4561 | tagtcacagt  | aagtttaagc  | gaaatatctg | gtagtgcatt  | agagctatca  | tttcgtttat  |
| 4621 | ttgacacttt  | tacaaaaaga  | gaattactta | ctcagtcagt  | tgtttttcca  | gcaaaagact  |
| 4681 | ggagaaaaat  | tggtcacctc  | gtttcggatg | tgatacatga  | tagattaatt  | ggtgagaaag  |
| 4741 | ggcacttcaa  | cacaaaaatc  | acgtatatcg | ctgaagaaaa  | agatagcaac  | tacaaaatctg |
| 4801 | tgcgtaaaat  | tgctgtgatg  | aatcaagatg | gaagtaatat  | aaaatactta  | acaaatggcg  |
| 4861 | atagatttgt  | gtcaacaccg  | agattctcac | caaatggaaa  | gggtatttgt  | tatatctcgt  |

```

4921 acgcaaatgg taaaagttat ataatatataaaaatttataa agataaacact gaatcaataa
4981 tcagcgcatt tgaaggagtt gtttctgcac caagattttt tcccgatggg aaatctcttt
5041 taattttcca ctcatgggt ggtgaaacga atatatattc tttggattta agtagtaaac
5101 gaacaaaaaa aattactaaa ggttcagcta taagcacttc tccctctttt tctccagatc
5161 aaaagtatat ggcttttagt tctgatataa gtgggagtca gcaactgtac gttatcgatt
5221 ttactaacia aagtaaaaaa cctaaaagaa ttagtttttg aagtggaaga tatgctacgc
5281 ctgtttgggt gccaaaagga gatctgatag cttttacaaa gattcagtca ggaaaatttt
5341 acataggagt tatgaagcca gatggcaaag aagaacgtct gctttcagag gggcataaaa
5401 ttgaatcccc ggcatggcta ccaaattgta gagaaatcat ttttacaaga acagaatcac
5461 caagcaactc taaactatat ttagtagact tagtaaagaa aaatcaaaaa atggtttcca
5521 ctcccacaaa tgcttcttta ccggtttggg cttatttttg aaagtagatc tattataggt
5581 ttgatattgag ccttattttt ctttaatcgc ttataacctt tggcactaca aaatacccat
5641 gctcagggtt tgtattggac aatatctctt ttttaattgt ttgagaattt ataacatcat
5701 cgcgtacatg aatgtccttg tctatgctgc cataacgcat aggagaaaca ccttcagtat
5761 taacttgcaa taaagtatcg tgtatccaat ccagcattgt cagttctttg gagtagtgat
5821 caatctcgtc atttgataac ttaatcctta caagctgtgc aattttaagc atttcttctt
5881 tggtaattgt tatttttctc ttatttgcaa attctattag tgaagtaata acgtcttctg
5941 ttgacttagc tggcatttct acctccttgg atgaagttag ttaaaatatt tacaaccgaa
6001 acaacttcta ttttaccagt tttttcaagt ttgtgaagta tggatatccg aatcactaat
6061 ttatctaaag aagaggaaga gattttctca actgcacttc ctgaaagcac accgtgtgtg
6121 atgcatgaag ttacggactt tgctccgtaa ctttttaaa caagagctgc attacacaac
6181 gttccaccag agtcaactat atcatcaaca atgacacaat tttgtttgca aacttctcct
6241 attatgttca ttacttgaga tgtgcctgct ttctccctat atttatctac tacaataatc
6301 ttatcactta accctatctt gtacttttcc tctaaagccc tcgcaaaagc acgtgctctg
6361 ccaattgccc caacatcagg tgcaacaatt gccaaatttt ccgtgtttat agagtcaaca
6421 aatgcttcaa agcagttcaa attagttacc ggtacatcaa agaatccttc aatttgactt
6481 gagtgcaaat caataactgc aacactactt gcacctgcag tttgaataag atttgcaact
6541 aatttagcac ttaaagcaga ttgcatatta ttgtttttga taattctatc ttgtctgcta
6601 tatccataat aaggaataat tactactatc cttttggctc ctaatctatt tactgcatca
6661 attataagca gaagctccat aaggttatca ttcacagggg gagaaagaga ttgtactatg
6721 tatacttctt gattatacag atcattttgct acttctacat ttacctcgcc atcggtaaac
6781 tttgatatac aagcagagga tggttgaaca tctagccggt taactactga tccccctaat
6841 tccttactag cattacctat tattatcttc ataacgcact aattgagttt ttaagattat
6901 acagaaattg taaaataaatt gaaatgtaag tttctttatc tagtattctt gtcggcgaat
6961 taggtatctc ttgtacaatg acctgtcatt ttcacgcatt gtttcaatat acagacccaa
7021 attgaaacaa ctatacaaaa tcctgcttat gtttcaagat aaatgacttt aatgaaatat
7081 aatttatcta gtcattttgta tctgctaaca tactacactt cccattgtag agcctctgca
7141 acttactgaa atttataatc gctttataaaa aagttttata ctctttgctt aattggaggt
7201 gctacctctg cactttctgc tctgtctagg gtactacttg gtttttctgc agtaattttt
7261 tgaatgctac catctacctt attcttgata tctgctccat atgatcttaa tacttcaata
7321 gctttttcgt ttccactatt cagcgcaata tccaaagcat ccattccatc attatttttg
7381 tggttgataa aattctctaa ctcaaagatt tttatatatt gctcaatgat gaattctacc
7441 acttttccag ggcaattatt agcggcagga aagagtactg cattgttatt attgtcttct
7501 tttgttacat ctgctttgag cttgtctatc aaatacttga taatttctat tctgctatca
7561 tcttctgctt cagtgcactg cctagcagct aaaaacagag ctgttcgccc attattgtcc
7621 acatcttcaa tatcttgtcc cttatcaatt aaggcttgta ttatatTTTT gttcccatac
7681 aaagcagcaa agtgaagagg agtataacct tcggtgcttt ctctttcatt aatcaatgca
7741 ccatggctag ctagtaattc tataaattct ggcgtatttg caaaaactgc aaagtgcatt
7801 ggtgttagat catctttacc atgattttga gtttttgcat taacgtttgc tccatttttt
7861 attagcaatt ttgctatttc taattgtttg cgtccgatgg caatatgcag tggcgtacga
7921 ttgcgttcat aatgatcatt gacgtttgtg ccacacttta ttagta

```

//

```

LOCUS      JAQZAU010000093              3717 bp    dna        linear    ENV 17-MAR-2023
DEFINITION MAG: Wolbachia pipientis isolate wEsol contig_47070, whole genome
            shotgun sequence.
ACCESSION  JAQZAU010000093  JAQZAU010000000
VERSION    JAQZAU010000093.1
DBLINK     BioProject: PRJNA929258
            BioSample: SAMN33142973
KEYWORDS   WGS; ENV; Metagenome Assembled Genome; MAG.

```

SOURCE Wolbachia pipientis (insect metagenome)

ORGANISM Wolbachia pipientis  
Bacteria; Pseudomonadota; Alphaproteobacteria; Rickettsiales;  
Anaplasmataceae; Wolbachieae; Wolbachia.

REFERENCE 1 (bases 1 to 3717)

AUTHORS Fiutek,N., Couger,B.M., Roy,S., de la Torre,J.R. and Connor,E.F.

TITLE Genomic assessment of the contribution of the Wolbachia  
endosymbiont of Eurosta solidaginis to gall-induction

JOURNAL International Journal Molecular Sciences

REFERENCE 2 (bases 1 to 3717)

AUTHORS Fiutek,N., Couger,B.M., Roy,S., de la Torre,J.R. and Connor,E.F.

TITLE Direct Submission

JOURNAL Submitted (10-FEB-2023) Biology, San Francisco State University,  
1600 Holloway Ave, San Francisco, CA 94132, USA

COMMENT ##Genome-Assembly-Data-START##  
Assembly Date :: JUN-2019  
Assembly Method :: FLYE v. 06-2019  
Genome Representation :: Full  
Expected Final Version :: Yes  
Genome Coverage :: 100.0x  
Sequencing Technology :: Illumina HiSeq; PacBio Sequel  
##Genome-Assembly-Data-END##

FEATURES

source Location/Qualifiers  
1..3717  
/organism="Wolbachia pipientis"  
/mol\_type="genomic DNA"  
/submitter\_seqid="contig\_47070"  
/isolate="wEsol"  
/isolation\_source="galls on Solidago altissima"  
/host="Eurosta solidaginis MN-2018-EFC"  
/db\_xref="taxon:955"  
/environmental\_sample  
/country="USA: Cowling Arboretum, Carleton College,  
Northfield, MN"  
/lat\_lon="44.48 N 93.13 W"  
/altitude="280 m"  
/collection\_date="2018-11"  
/metagenome\_source="insect metagenome"  
/note="metagenomic"

gene <1..203  
/locus\_tag="wEsol\_01037"

CDS <1..203  
/locus\_tag="wEsol\_01037"  
/codon\_start=1  
/transl\_table=11  
/product="hypothetical protein"  
/translation="RISGGLYQPYYHLAELHIGIECFDLFNYYAHDDFSPCINSKVY  
EFIYVYVCSVISIITKLSQT"

gene complement(993..1241)  
/locus\_tag="wEsol\_01038"

CDS complement(993..1241)  
/locus\_tag="wEsol\_01038"  
/codon\_start=1  
/transl\_table=11  
/product="hypothetical protein"  
/translation="MKEPNYTREPIALFRQIKEKKSSDLLHNLKNACPKNLNIGIAI  
KTGDCFFDSVAQGLNDLNIKPGYRFTAKSLRNRLCRLC"  
/besthit="qcoverage 91.4634146341463 , hcoverage  
28.4090909090909 , similarity 100 , identity 98.7 ,  
evalue 1.08e-43 , alnlength 75 , Bacteria ,

Proteobacteria , MBV2146629.1 ankryin [Wolbachia endosymbiont of Pissodes strobi]"

gene complement(1436..2218)  
/locus\_tag="wEsol\_01039"

CDS complement(1436..2218)  
/locus\_tag="wEsol\_01039"  
/codon\_start=1  
/transl\_table=11  
/fullproduct="qcoverage 100 , hcoverage 100 , similarity 100 , identity 99.2 , evalue 5.21e-177 , alnlength 260 , Bacteria , Proteobacteria , MBV2146630.1 DsbA family protein [Wolbachia endosymbiont of Pissodes strobi]"  
/cog="DsbG COG1651 244 Protein-disulfide isomerase"  
/pfam="Thioredoxin\_4 Thioredoxin\_2 DSBA"  
/product="DsbA family protein"  
/translation="MSRISFLLILILAVASLPVINNWLSNRSQMLSDDYIGEKL DNYI SRNFDKIVKTLKEESIKSSYAARDNVTKSKISQYKDQIFDLTYPYSGNENSSVIAVGF FDYSCGYCRTIKDDIKQLINDGKIKYIFRDAPILGNDSLRAAKSALAVYFVDKEKYFD FHYSALSHKGGFSDESILDIVKSIGIDEDDFNNNSMKNNADKIEQMINGSKLLVRDLGV GGTPFLIIGDSLFGATDLNVLRKKVDEL SRKQKLASAINLL"  
/besthit="qcoverage 100 , hcoverage 100 , similarity 100 , identity 99.2 , evalue 5.21e-177 , alnlength 260 , Bacteria , Proteobacteria , MBV2146630.1 DsbA family protein [Wolbachia endosymbiont of Pissodes strobi]"

gene 2346..2582  
/locus\_tag="wEsol\_01040"

CDS 2346..2582  
/locus\_tag="wEsol\_01040"  
/codon\_start=1  
/transl\_table=11  
/fullproduct="qcoverage 92.3076923076923 , hcoverage 100 , similarity 97.2 , identity 95.8 , evalue 2.03e-42 , alnlength 72 , Bacteria , Proteobacteria , MBV2146631.1 hypothetical protein [Wolbachia endosymbiont of Pissodes strobi]"  
/translation="MQTLRTMELKHITEKLIRRLGDANEQTIARIANYEMLYLLPPHI TTVNTAVKKVDHLITAVYNANKCGGKLYERTNNW"  
/product="hypothetical protein"  
/besthit="qcoverage 92.3076923076923 , hcoverage 100 , similarity 97.2 , identity 95.8 , evalue 2.03e-42 , alnlength 72 , Bacteria , Proteobacteria , MBV2146631.1 hypothetical protein [Wolbachia endosymbiont of Pissodes strobi]"

gene 2560..3072  
/locus\_tag="wEsol\_01041"

CDS 2560..3072  
/locus\_tag="wEsol\_01041"  
/codon\_start=1  
/transl\_table=11  
/pfam="AAA\_16 Arch\_ATPase Pfam-B\_542 Pfam-B\_11659 AAA\_22 AAA\_14 AAA"  
/fullproduct="qcoverage 99.4117647058823 , hcoverage 99.4117647058823 , similarity 100 , identity 100 , evalue 1.26e-119 , alnlength 169 , Bacteria , Proteobacteria , MBV2146632.1 ATP-binding protein [Wolbachia endosymbiont of Pissodes strobi]"  
/translation="MSEPIIGREKEIAILES KLLFSPFAEFIAVYGRRRVGKTYLIQ FFSKHADVLF EQTGLNNGTMQEQLAIFTQSLSNTFYKGAKMALPEVWLDALQQLTLAI DNTHENEHIVLFFDEL PWLATRKS RFLETLEYFWNIHWTNRKKLILVCGSAASWMLE NIIYTKRGVT"

```

        /product="ATP-binding protein"
        /besthit="qcoverage 99.4117647058823 , hcoverage
64.4859813084112 , similarity 98.1 , identity 97.6 , evaluate
1.26e-119 , alnlength 169 , Bacteria , Proteobacteria ,
MBV2146632.1 ATP-binding protein [Wolbachia endosymbiont
of Pissodes strobi]"
gene      3095..>3717
          /locus_tag="wEsol_01042"
CDS       3095..>3717
          /locus_tag="wEsol_01042"
          /codon_start=1
          /transl_table=11
          /product="hypothetical protein"
          /pfam="HTH_24"
          /translation="MQPFNLRETKEYLRYLGINLNHQQILQIYMTIGGIPHYLKEVIK
GLSAAQNINMICFQKGGLLFDEFDMLFHSLEYEPETYLNIIIRAIKKPKGISRKELIK
ATKITEGGRLTAKLRSLEEAGFIGGFLPLNKRKRGVYYRVMDEYVLFYLTWIEPFKEV
TKRAIISDAHYWELAIKKPAWQTWAGQTFEAVCFKHANVIRKKLDIE"
          /besthit="qcoverage 100 , hcoverage 64.4859813084112 ,
similarity 98.1 , identity 97.6 , evaluate 5.14e-143 ,
alnlength 207 , Bacteria , Proteobacteria , MBV2146633.1
winged helix-turn-helix domain-containing protein
[Wolbachia endosymbiont of Pissodes strobi]"

```

#### ORIGIN

```

1  tacgaatatc  tgggtggccta  taccagcctt  attatcacct  agctgaacta  cacataggta
61  ttgaatgctt  cgacttgctt  aattacaatt  atgcccacga  tgatttttca  ccggtgatca
121 actcaaaagt  gtatgaattc  atatatgtat  atgtgtgtag  tgtaatatca  ataatacaaa
181 ttacaaaatt  gagtcaaact  taatttgatc  taagtcaggt  cctaagtgag  agcgtttgag
241 cgcggaatcg  tttattagca  ttcatcacgt  cgattggcat  ctcaaaagaa  ctatcaacac
301 aaatgtgcat  acatatattt  atacgatgaa  atgcttttac  aactccatcc  tcgaacgccc
361 tgcacttggc  cttttattgt  gagcaatcga  aaattgcgac  cgtccgattt  gcatacctct
421 aaacaaacta  aatgattgcy  cgttgacca  cgcactttcc  tacaaaaaac  tgaaagtgtg
481 aaatatacaa  atgtaaatta  taatagactg  caattgtcta  aaaacagcag  tctccacatg
541 aacaagggca  acagacaggg  atggaatgga  ggcacaattg  cgagacacaa  tctctttgta
601 ttgacaacca  aaacaaaacc  aataaccaa  cctcaccagc  tgatttttct  aaggcgcctt
661 ggaaactagc  aaaggggtat  atagcgctta  ttgcgcttgg  ctactatact  ttacacaaac
721 gcaccattcc  ctttctctcc  tacacgcgca  taacgatatc  tcttcaatga  gtgcactaac
781 aataactaca  gcagatgata  acattctccc  tatttgttct  acgctcttaa  agctattcgt
841 tggctcttaa  ttcttagtgt  ttattgtctg  gtataatatt  gttctgggta  tctttcatta
901 catttcggtt  tgaacctatc  ataggtacag  catatccttc  agcaatattt  tttgttattt
961 cattaaaaac  ccttcgtgag  tcctttttgt  tttcagcata  atctgcacaa  tctgtttcct
1021 aatgattttg  cggtaaaaac  ataaccaggt  tttatattta  agtcattcaa  cccttgagcc
1081 acggagtcaa  aaaagcaatc  tcctgtcttt  atagcaattc  ctatgtttag  atttttggga
1141 caagcatttt  tttaaattat  cagtaaatac  cttgattttt  tcttttcttt  gatttgtcga
1201 aaaagagcaa  ttggttctct  tgtataatta  ggctctttca  tattgtaacc  tcagaatggt
1261 agctatatgt  taagtttaac  actttttaat  ggattagtca  acctttgcag  gctaagggtt
1321 tgctcgactg  taggcatcac  ctgcttttct  tgagctactg  cgtatcttat  acgtactgct
1381 atttaacaca  ttcataatta  gattcgttta  cgttgtcaag  taaagaaata  caattttata
1441 gcaaattaat  cgctgaagct  agtttttgc  tccgacttaa  ttcactact  tttttgcgta
1501 atacattcaa  atcagttgct  cctacaaaca  gactatcccc  aattattaaa  aaaggtgtgc
1561 cccctactcc  caaatctctt  actaggagct  tactgccatt  tatcatttgc  tcaattttgt
1621 ccgcgttatt  tttcatggaa  ttattaaaa  cgctcctcat  aatccctatg  cttttcacta
1681 tatccaatat  gctttcgtct  gaaaatcctc  ctttgtgact  taaagcagaa  tagtgaaagt
1741 cgaaatattt  ttctttatca  acaaagtaaa  cagctaaagc  gctttttgct  gcccttaaag
1801 agtcattacc  aagtattgga  gcatccctaa  agatatactt  aattttaccg  tcggttaatta
1861 actgttttat  atcgtctttt  atagtcctgc  aatatccaca  agaatagtca  aagaaaccta
1921 cggctataac  actactattt  tcatttcagg  agtaaggata  agtaagggtca  aatatttgat
1981 ccttgatttg  tgaaatttta  cttttgggtc  cattatctcg  agcagcgtaa  ctacttttaa
2041 tcgactcctc  tttgagagtt  tttacgatct  tatcaaaatt  tctacttata  taattatcta
2101 atttctcacc  tatataatca  tcgcttagca  tttggctgcy  atttgaaagc  caattgttta

```



```

/mol_type="genomic DNA"
/submitter_seqid="contig_47189"
/isolate="wEsol"
/isolation_source="galls on Solidago altissima"
/host="Eurosta solidaginis MN-2018-EFC"
/db_xref="taxon:955"
/environmental_sample
/country="USA: Cowling Arboretum, Carleton College,
Northfield, MN"
/lat_lon="44.48 N 93.13 W"
/altitude="280 m"
/collection_date="2018-11"
/metagenome_source="insect metagenome"
/note="metagenomic"
gene 59..439
      /locus_tag="wEsol_01043"
CDS   59..439
      /locus_tag="wEsol_01043"
      /codon_start=1
      /transl_table=11
      /fullproduct="qcoverage 100 , hcoverage 100 , similarity
100 , identity 100 , evaluate 1.16e-87 , alnlength 126 ,
Bacteria , Proteobacteria , AOV87106.1 transposase
[Wolbachia endosymbiont of Drosophila incompta]"
      /cog="COG3293 COG3293 124 Transposase and inactivated
derivatives"
      /pfam="DUF4096"
      /product="transposase"
      /translation="MRKKYPTDLSEREWARIEKHFRVSYKKGGRPPKYSKREILEAIF
YVLRGTCQWRYLPNDFPLWKTVYEQFRQWKKQGIFEKMNIEITKYSRRKIGRNEQPSA
CIVDSQSVKTTEKGGSKAMMEVKK"
      /besthit="qcoverage 100 , hcoverage 100 , similarity 100
, identity 100 , evaluate 1.16e-87 , alnlength 126 ,
Bacteria , Proteobacteria , AOV87106.1 transposase
[Wolbachia endosymbiont of Drosophila incompta]"
gene 550..891
      /locus_tag="wEsol_01044"
CDS   550..891
      /locus_tag="wEsol_01044"
      /codon_start=1
      /transl_table=11
      /fullproduct="qcoverage 100 , hcoverage 100 , similarity
100 , identity 100 , evaluate 1.53e-79 , alnlength 113 ,
Bacteria , Proteobacteria , AAS13810.1 transposase, IS5
family, OrfB [Wolbachia endosymbiont of Drosophila
melanogaster]"
      /cog="COG3293 COG3293 124 Transposase and inactivated
derivatives"
      /pfam="DDE_Tnp_1_2 DDE_Tnp_1"
      /product="transposase, IS5 family, OrfB"
      /translation="MRTKYTKVKKMWADMGYQGRNLKNHIKEEYDIDIEIVKRPPCRF
WVHKDTPPELLPTREQGFKVQPRRWVVERTFAWVNRNRRLSKEYDLLTTSTENFIYLA
MSRVMLKREYA"
      /besthit="qcoverage 100 , hcoverage 100 , similarity 100
, identity 100 , evaluate 1.53e-79 , alnlength 113 ,
Bacteria , Proteobacteria , AAS13810.1 transposase, IS5
family, OrfB [Wolbachia endosymbiont of Drosophila
melanogaster]"
gene complement(928..1239)
      /locus_tag="wEsol_01045"

```

CDS complement(928..1239)  
 /locus\_tag="wEsol\_01045"  
 /codon\_start=1  
 /transl\_table=11  
 /fullproduct="qcoverage 100 , hcoverage 100 , similarity 100 , identity 100 , evalue 1.60e-74 , alnlength 103 , Bacteria , Proteobacteria , WP\_155968470.1 transposase [Wolbachia pipientis]"  
 /cog="COG3335 COG3335 132 Transposase and inactivated derivatives"  
 /pfam="DDE\_3 DDE\_1"  
 /product="transposase"  
 /translation="MTFKGGCDKEVFNTWLEKMLLPKLPHGTTIVMDNATFHKTPKTK ELIDNARCRLLYLPTYSPDLNPIEHCWNTIKSRLRPLMHKYTDLQLLVGNTIMEIYHS F"  
 /besthit="qcoverage 100 , hcoverage 100 , similarity 100 , identity 100 , evalue 1.60e-74 , alnlength 103 , Bacteria , Proteobacteria , WP\_155968470.1 transposase [Wolbachia pipientis]"

gene complement(1439..1786)  
 /locus\_tag="wEsol\_01046"

CDS complement(1439..1786)  
 /locus\_tag="wEsol\_01046"  
 /codon\_start=1  
 /transl\_table=11  
 /fullproduct="qcoverage 100 , hcoverage 100 , similarity 100 , identity 100 , evalue 2.74e-74 , alnlength 115 , Bacteria;Eukaryota , Proteobacteria;Arthropoda , WP\_155968342.1 MULTISPECIES: IS630 transposase-related protein [Wolbachia]"  
 /cog="COG3415 COG3415 138 Transposase and inactivated derivatives"  
 /pfam="HTH\_Tnp\_IS630 HTH\_Tnp\_1 HTH\_23 HTH\_28 HTH\_29 HTH\_7 CENP-B\_N Pfam-B\_14738 HTH\_8 HTH\_17 HTH\_24 Pfam-B\_2106"  
 /product="IS630 transposase-related protein"  
 /translation="MAYSVDLRERAVSMIEKGKSKVEVAELLEIGIATLYRWLRKKAA GESLRPSKNGSFIRKIDPKILEEYVKKNPDHTLAEMKQNLGFGINSIWYRLKQLRITL KKSYSISRQSR"  
 /besthit="qcoverage 100 , hcoverage 100 , similarity 100 , identity 100 , evalue 2.74e-74 , alnlength 115 , Bacteria;Eukaryota , Proteobacteria;Arthropoda , WP\_155968342.1 MULTISPECIES: IS630 transposase-related protein [Wolbachia]"

gene 1978..>2083  
 /locus\_tag="wEsol\_01047"

CDS 1978..>2083  
 /locus\_tag="wEsol\_01047"  
 /codon\_start=1  
 /transl\_table=11  
 /fullproduct="qcoverage 100 , hcoverage 100 , similarity 100 , identity 100 , evalue 7.03e-17 , alnlength 35 , Bacteria , Proteobacteria , AAS14233.1 hypothetical protein WD\_0521 [Wolbachia endosymbiont of Drosophila melanogaster]"  
 /translation="MNLSWRGYRLIAADGSGMRLPSSGEIVSEFEPNGN"  
 /product="hypothetical protein"  
 /besthit="qcoverage 100 , hcoverage 100 , similarity 100 , identity 100 , evalue 7.03e-17 , alnlength 35 , Bacteria , Proteobacteria , AAS14233.1 hypothetical

protein WD\_0521 [Wolbachia endosymbiont of Drosophila melanogaster]"

ORIGIN

```

1 aggttggtccg gaaataagta aaaggctata atatctgaaa ttttagtacg gggtaaagat
61 gagaaaaaag tatccaacag atctaagcga aagggaatgg gcaagaatag aaaaacactt
121 cagagtatca tacaagaaag gaggaaggcc gccaaagtat agcaaaagag aaatattaga
181 agcaattttc tatgtattgc gtacaggggtg tcaatggcgg tattttacca atgattttcc
241 gctatggaag actgtgtatg agcagttcag gcaatggaag aagcagggaa tttttgagaa
301 aatgaattat gaaattacaa aatatagtag aagaaaaata ggaaggaatg agcagccgag
361 tgcctgtata gtagatagtc aatctgtaaa gactacagaa aaggggggat caaaggctat
421 gatggaagta aaaaagtaaa gggtagaaaa aggcataata ttacagacac tcagggtttt
481 atactagggtt gttacgtagg cgctgctaac gaaaatgata gagatgggtat taaaatagca
541 ttaaacaata tgagaacaaa atatactaaa gttaaaaaaa tgtgggctga catgggatac
601 caaggaagaa atttaaagaa tcacataaag gaagaatatg acatagatat tgaaattggt
661 aaaaggcctc catgtagatt ttgggtgcac aaagatacgc cacctgagct actaccaaca
721 agagaacaag ggtttaaagt acagccaaga agatgggttg tagaaaggac ttttgcttgg
781 gttaatagga atagaaggct atcgaaggag tatgatttac tcacaacatc cactgagaat
841 ttcatatacc tagctatgag tagggttatg ttaaagaggg aatatgcttg aatttactag
901 tttccggaca acctcttata gtattttcta aaatgaatga taaatttcca ttatggtatt
961 accaaccaaa agttgtaagt ctgtatatat atgcattaaa ggtctgaggc ggcttttgat
1021 ggtattccaa caatgctcta tagggttcaa atctggtgaa tatggttgga gatagagcaa
1081 acggcatcta gcattatcta ttaactcctt tgttttggga gttttatgga atgtggcatt
1141 gtccataact attgtagtac catgtggcaa ttaggtaat aacatcttct ctaaccatgt
1201 attgaatacc tctttgtcac acccaccttt gaaagtcatt ggtgcaataa atctctttcc
1261 aatccaccgc cctattatac tgattctctc tcgttttctt cctggaatat ctgcataaat
1321 tttctttcct attggagcac gtccatactc tcggtataac ctattatcaa ctctgcttc
1381 atctatatat aagatgctgg aatggctctat ttttgagatt ttatcggtaa atcgctgcct
1441 atcttcttga ttgcgctctt gatatagtgt aacttttttt taaagtaatt cttagctggt
1501 tcagcctata ccaaattgaa tttattccaa atccaagatt ttgtttcatc tctgccagcg
1561 tatgatctgg attcttttta acatattctt cgagtatttt tgggtctatt tttcgaataa
1621 agctgccggt tttcgatggc cttaggcttt caccagcggc tttctttctt aaccagcgg
1681 acagagttgc tattcctatc tccaaaagct ctgccacctc aacctttgac ttcccttttt
1741 ctatcatcga tactgccctt tcccttaaat ccacactata cgccattata actcaaatag
1801 cttattatac ctttatcatt tactttggga agtactatag ttaaaaaaag tttgggaata
1861 gaatgtgaac ttatggagcc attgacatgt accctcaaag caagcttttt cttaaagcaag
1921 gtataagatt tgccatacag gctttcaaga atttaagcat ccaaacagcc tatcaggatg
1981 aacctgagtt ggagaggcta tagacttatt gcagcagatg gttctggtat gagattaccc
2041 agctctggag aaattgtatc cgagtttgaa ccaaattgaa act

```

//

```

LOCUS      JAQZAU010000095      11528 bp      dna      linear      ENV 17-MAR-2023
DEFINITION MAG: Wolbachia pipientis isolate wEsol contig_47541, whole genome
            shotgun sequence.
ACCESSION  JAQZAU010000095  JAQZAU010000000
VERSION    JAQZAU010000095.1
DBLINK     BioProject: PRJNA929258
            BioSample: SAMN33142973
KEYWORDS   WGS; ENV; Metagenome Assembled Genome; MAG.
SOURCE     Wolbachia pipientis (insect metagenome)
ORGANISM   Wolbachia pipientis
            Bacteria; Pseudomonadota; Alphaproteobacteria; Rickettsiales;
            Anaplasmataceae; Wolbachieae; Wolbachia.
REFERENCE  1 (bases 1 to 11528)
AUTHORS    Fiutek,N., Couger,B.M., Roy,S., de la Torre,J.R. and Connor,E.F.
TITLE      Genomic assessment of the contribution of the Wolbachia
            endosymbiont of Eurosta solidaginis to gall-induction
JOURNAL    International Journal Molecular Sciences
REFERENCE  2 (bases 1 to 11528)
AUTHORS     Fiutek,N., Couger,B.M., Roy,S., de la Torre,J.R. and Connor,E.F.
TITLE      Direct Submission
JOURNAL    Submitted (10-FEB-2023) Biology, San Francisco State University,

```

```

1600 Holloway Ave, San Francisco, CA 94132, USA
COMMENT ##Genome-Assembly-Data-START##
Assembly Date      :: JUN-2019
Assembly Method    :: FLYE v. 06-2019
Genome Representation :: Full
Expected Final Version :: Yes
Genome Coverage    :: 100.0x
Sequencing Technology :: Illumina HiSeq; PacBio Sequel
##Genome-Assembly-Data-END##
FEATURES
    source      Location/Qualifiers
                1..11528
                /organism="Wolbachia pipientis"
                /mol_type="genomic DNA"
                /submitter_seqid="contig_47541"
                /isolate="wEsol"
                /isolation_source="galls on Solidago altissima"
                /host="Eurosta solidaginis MN-2018-EFC"
                /db_xref="taxon:955"
                /environmental_sample
                /country="USA: Cowling Arboretum, Carleton College,
                Northfield, MN"
                /lat_lon="44.48 N 93.13 W"
                /altitude="280 m"
                /collection_date="2018-11"
                /metagenome_source="insect metagenome"
                /note="metagenomic"
    gene        2490..2636
                /locus_tag="wEsol_01048"
    CDS         2490..2636
                /locus_tag="wEsol_01048"
                /codon_start=1
                /transl_table=11
                /product="hypothetical protein"
                /translation="MEVYIYLDSEFIPVQPTVIQSKLIYSVSSAQLSIKIGSKISDAVA
                HETA"
    gene        complement(2576..2908)
                /locus_tag="wEsol_01049"
    CDS         complement(2576..2908)
                /locus_tag="wEsol_01049"
                /codon_start=1
                /transl_table=11
                /product="hypothetical protein"
                /translation="MTNKNDNSNSKYRNFYVLGDSLSDNGEIIGILNNFSFAKSVKFD
                DPFYQGGSFSGPTAVEYVAKYLDLDEFKPGWRYSFSGKCHEQQQNYAVSCATASEI
                FDPIFILS"
                /besthit="qcoverage 97.2727272727273 , hcoverage
                69.4805194805195 , similarity 97.2 , identity 95.3 ,
                evaluate 3.68e-70 , alnlength 107 , Eukaryota , Arthropoda
                , GFQ81579.1 GDSL family lipase [Trichonephila clavata]"
    gene        complement(3072..3614)
                /locus_tag="wEsol_01050"
    CDS         complement(3072..3614)
                /locus_tag="wEsol_01050"
                /codon_start=1
                /transl_table=11
                /fullproduct="qcoverage 81.6666666666667 , hcoverage
                80.327868852459 , similarity 96.6 , identity 94.6 ,
                evaluate 6.06e-87 , alnlength 147 , Bacteria ,
                Proteobacteria , EAL60191.1 RNA polymerase sigma factor
                RpoD [Wolbachia endosymbiont of Drosophila simulans]"

```

```

/cog="RpoD COG0568 342 DNA-directed RNA polymerase, sigma
subunit (sigma70/sigma32)"
/pfam="MnhB Sigma70_r3 Sigma70_r4 Pfam-B_208 Sigma70_r4"
/tigr="TIGR02393 RpoD_Cterm 238 RNA polymerase sigma
factor RpoD"
/product="RNA polymerase sigma factor RpoD"
/translation="MIPFIISFHGDYTPGGGFQAGIIIASGIILYTMLFGALRKMTHE
MGREPTLEELSVELTMPLERICKVMKIARDPVSLEAPT GKDDSSSTFGDCIEDKRVS RP
EDATILADLRGITTSVLATLTPKEKRILRMRFGLGKGKEHTLEEVGKIFNVTRERIR
QIEAKALRKLKHPNRARGFF"
/besthit="qcoverage 81.6666666666667 , hcoverage
80.327868852459 , similarity 96.6 , identity 94.6 ,
evaluate 6.06e-87 , alnlength 147 , Bacteria ,
Proteobacteria , EAL60191.1 RNA polymerase sigma factor
RpoD [Wolbachia endosymbiont of Drosophila simulans]"
gene complement(6449..6655)
/locus_tag="wEsol_01051"
CDS complement(6449..6655)
/locus_tag="wEsol_01051"
/codon_start=1
/transl_table=11
/product="hypothetical protein"
/pfam="Pfam-B_5378 Pfam-B_14745"
/translation="MLFLAVCLSYFMIAPYYVENTEKATGIPNIVTAVLASFRGYDTF
GETIVVFTAALCITLILKEEKDND"
/cog="MnhB COG2111 162 Multisubunit Na+/H+ antiporter,
MnhB subunit"
/besthit="qcoverage 123.529411764706 , hcoverage 48 ,
similarity 81.0 , identity 81.0 , evaluate 1.74e-35 ,
alnlength 84 , Bacteria , Proteobacteria , MBV2146020.1
DUF4040 domain-containing protein [Wolbachia endosymbiont
of Pissodes strobi]"
gene complement(6693..6929)
/locus_tag="wEsol_01052"
CDS complement(6693..6929)
/locus_tag="wEsol_01052"
/codon_start=1
/transl_table=11
/product="hypothetical protein"
/pfam="DUF4040"
/translation="MLEILNVVLLLLLLTVTVFIVFSRHLVVS AVLMCVFSSLI ALIY
LIMNAPDVAITEASVGVLSTIFYVCSILLDKES"
/cog="COG1563 COG1563 87 Predicted subunit of the
Multisubunit Na+/H+ antiporter"
/besthit="qcoverage 98.7179487179487 , hcoverage 44 ,
similarity 90.9 , identity 88.3 , evaluate 1.98e-27 ,
alnlength 77 , Bacteria , Proteobacteria , WP_164224943.1
DUF4040 domain-containing protein [Wolbachia pipientis]"
gene complement(6931..7218)
/locus_tag="wEsol_01053"
CDS complement(6931..7218)
/locus_tag="wEsol_01053"
/codon_start=1
/transl_table=11
/fullproduct="qcoverage 100 , hcoverage 100 , similarity
98.9 , identity 95.8 , evaluate 3.42e-52 , alnlength 95 ,
Bacteria , Proteobacteria , WP_096617042.1 monovalent
cation/H(+) antiporter subunit G [Wolbachia pipientis]"
/cog="MnhG COG1320 113 Multisubunit Na+/H+ antiporter,
MnhG subunit"

```

```

/pfam="PhaG_MnhG_YufB"
/tigr="TIGR01300_CPA3_mnhG_phaG 97 monovalent
cation/proton antiporter, MnhG/PhaG subunit"
/product="monovalent cation/H(+) antiporter subunit G"
/translation="MIGSVLIFLGICSVIISVGVIRFRDFFTRLHAAGITDSSGATL
LLIGFALQNGFSINTVKIILLILVIWVASSTSGYILARTYYKVKKKTVKEG"
/besthit="qcoverage 100 , hcoverage 100 , similarity 98.9
, identity 95.8 , evalue 3.42e-52 , alnlength 95 ,
Bacteria , Proteobacteria , WP_096617042.1 monovalent
cation/H(+) antiporter subunit G [Wolbachia pipientis]"
gene complement(7225..7689)
/locus_tag="wEsol_01054"
CDS complement(7225..7689)
/locus_tag="wEsol_01054"
/codon_start=1
/transl_table=11
/product="hypothetical protein"
/pfam="Kinesin Bac_DnaA RuvB_N Arch_ATPase IstB_IS21
AAA_25 AFG1_ATPase AAA"
/tigr="TIGR00362 DnaA 437 chromosomal replication
initiator protein DnaA"
/translation="MKKILSLWQSEDKSIRSIDIHVIEERNSNFNVILKNREESNHNH
RSPLDPRFTFDNFVVGKPNELAFTAAKRVAESIDPILGSNPLFLYGGVGLGKTHLMHA
IAWHIVNSPSEKRKVVYLSAEKVYQYITALRSKDIMLFKEQFRSVDVLMFLF"
/cog="DnaA COG0593 408 ATPase involved in DNA replication
initiation"
/besthit="qcoverage 98.7012987012987 , hcoverage
35.8490566037736 , similarity 98.0 , identity 98.0 ,
evalue 1.47e-95 , alnlength 152 , Eukaryota , Arthropoda
, GFR26469.1 chromosomal replication initiator protein
DnaA [Trichonephila clavata]"
gene 7927..8376
/locus_tag="wEsol_01055"
CDS 7927..8376
/locus_tag="wEsol_01055"
/codon_start=1
/transl_table=11
/product="hypothetical protein"
/pfam="Gln-synt_C"
/tigr="TIGR00653 GlnA 462 glutamine synthetase, type I"
/translation="MDRAGSALNVHVNLVNSNNDNLFYINEQKYSDYLIHSIGGLCAM
MKKHMLFFAPNDDSHLRFQYPDIHTPTTISWGVNNRTAAIRIPYFGNDSKRCRLEHRV
PGADCNLEKVLTAIIEGIVFGIENKISPPNRVYGIASDSQYKMKSLI"
/cog="GlnA COG0174 443 Glutamine synthetase"
/besthit="qcoverage 100 , hcoverage 60.8163265306122 ,
similarity 100 , identity 98.0 , evalue 3.62e-103 ,
alnlength 149 , Bacteria , Proteobacteria , MBV2146396.1
glutamine synthetase [Wolbachia endosymbiont of Pissodes
strobil]"
gene complement(8517..8924)
/locus_tag="wEsol_01056"
CDS complement(8517..8924)
/locus_tag="wEsol_01056"
/codon_start=1
/transl_table=11
/product="hypothetical protein"
/translation="MVAILNVTKGKRKVIIVSGLAGALSAIHIAAKIAIIVSAAVTYL
LLLLIHKIRTKAEITRVSEDKGEEKDTEISVKEPKRTETELAEELKNKRAQEEMKNGL
PEHMDFKGNSLSKRTNADDTSRTRYATNYMDLM"
/besthit="qcoverage 104.4444444444444 , hcoverage

```

```

68.1159420289855 , similarity 81.6 , identity 78.0 ,
evaluate 7.96e-50 , alnlength 141 , Bacteria ,
Proteobacteria , WP_077188464.1 hypothetical protein
[Wolbachia pipientis]"
gene 9010..9537
/locus_tag="wEsol_01057"
CDS 9010..9537
/locus_tag="wEsol_01057"
/codon_start=1
/transl_table=11
/product="hypothetical protein"
/translation="MFAAAEALERDLFNQYKLISSNVYVTLTSSKVKYISQNKHEHNSK
RLLVNMFDELLHLINCSKEDCIRGLQCSKTIDECALLLKFSELLPYALVADMTFENN
HEMRNWCEKNDVIALDTSFINNFQENQDVYEVCKTSLFLKQTQEVNIISYRTESGGRE
HHAIIGNPDKDGEP"
/besthit="qcoverage 100 , hcoverage 48.6111111111111 ,
similarity 99.4 , identity 98.9 , evaluate 6.64e-118 ,
alnlength 175 , Bacteria , Proteobacteria , MBV2145302.1
GTP cyclohydrolase II [Wolbachia endosymbiont of Pissodes
strobil]"
gene 9621..10004
/locus_tag="wEsol_01058"
CDS 9621..10004
/locus_tag="wEsol_01058"
/codon_start=1
/transl_table=11
/fullproduct="qcoverage 96.0629921259843 , hcoverage 100
, similarity 98.4 , identity 98.4 , evaluate 7.43e-79 ,
alnlength 122 , Eukaryota , Arthropoda , GFT45042.1 GTP
cyclohydrolase-2 [Nephila pilipes]"
/cog="RibA COG0807 193 GTP cyclohydrolase II"
/pfam="GTP_cyclohydro2"
/tigr="TIGR00505 ribA 191 GTP cyclohydrolase II"
/product="GTP cyclohydrolase-2"
/translation="MIADSGSGIILYLMQDGRGIGLTNKLRAYSVQRGHNLDTV DANR
ILGFEDDERSFAVAAKMLNKLNINKIQTLTNNDRKLSELESSGIGVTKCLPLIVERNK
YNDSYMETKFGKLGHRRLRVFLAFL"
/besthit="qcoverage 96.0629921259843 , hcoverage 100 ,
similarity 98.4 , identity 98.4 , evaluate 7.43e-79 ,
alnlength 122 , Eukaryota , Arthropoda , GFT45042.1 GTP
cyclohydrolase-2 [Nephila pilipes]"
gene 10283..10735
/locus_tag="wEsol_01059"
CDS 10283..10735
/locus_tag="wEsol_01059"
/codon_start=1
/transl_table=11
/product="hypothetical protein"
/pfam="VirB8"
/translation="MVDPIITVKQYSANEALNVYFISEYIKAREVFDPHYHYNYYTKV
RLFSSPNVYNEFRNYVGSQNMDLFLNLYSDTKSEFIIRSIQKLGNDALQVRFFVEFIR
KDGSSSTRKNKIDIMSYRLCASLEMDDQQRYINPLGFQVISYRVDDEYV"
/cog="VirB8 COG3736 239 Type IV secretory pathway,
component VirB8"
/besthit="qcoverage 100 , hcoverage 66.3716814159292 ,
similarity 96.7 , identity 94.7 , evaluate 2.21e-93 ,
alnlength 150 , Eukaryota , Arthropoda , GFQ82657.1
uncharacterized protein RP289 [Trichonephila clavata]"
gene 10722..11063
/locus_tag="wEsol_01060"

```

CDS 10722..11063  
 /locus\_tag="wEsol\_01060"  
 /codon\_start=1  
 /transl\_table=11  
 /product="hypothetical protein"  
 /pfam="CagX"  
 /tigr="TIGR02781 VirB9 248 P-type conjugative transfer protein VirB9"  
 /translation="MNMRYILLVLLALLVSGNLNTSINYNEPISVDSIIKTFVYSPNEV  
 FTVVYSQGYYSIEFAEGEKVKNIAVGDASSWKINPYDNKLLIMPFEVSSRTNMIITT  
 TKKRNIFDLI"  
 /cog="VirB9 COG3504 265 Type IV secretory pathway, VirB9 components"  
 /besthit="qcoverage 100 , hcoverage 42.4812030075188 ,  
 similarity 98.2 , identity 97.3 , evaluate 3.57e-67 ,  
 alnlength 113 , Bacteria , Proteobacteria , MBV2146349.1  
 P-type conjugative transfer protein VirB9 [Wolbachia  
 endosymbiont of Pissodes strobi]"

gene 11106..11315  
 /locus\_tag="wEsol\_01061"

CDS 11106..11315  
 /locus\_tag="wEsol\_01061"  
 /codon\_start=1  
 /transl\_table=11  
 /product="hypothetical protein"  
 /tigr="TIGR02781 VirB9 248 P-type conjugative transfer protein VirB9"  
 /translation="MGHDYSAEKDISYVGRFYYPQEEGEFDLDLDEVSLTTQMQYTTD  
 KPEKIIQENDTKYNYTYTDEAGNTD"  
 /besthit="qcoverage 100 , hcoverage 25.9398496240602 ,  
 similarity 92.8 , identity 91.3 , evaluate 9.92e-35 ,  
 alnlength 69 , Bacteria , Proteobacteria , MBV2146349.1  
 P-type conjugative transfer protein VirB9 [Wolbachia  
 endosymbiont of Pissodes strobi]"

# ORIGIN

```

1 aaaaaaaaaac aagtaaggaa ggctaagttc ggggtgtaacc gaacattaca tactcagttg
61 agagctgtgg agacaaagta agggaaatca ccatgttgta aaaggaacct agggtaaccc
121 tggaatttgt ttgtatgaca tgtgtatcaa atggaaggta ttaaagagta ttttaagagg
181 aagtaggcca tagatctata gatggacgcc atttagggat atcgccataa aggtggacca
241 ggcctgactc gagaatttgt ttgtacgata tgggtatcaa atgaaatgtg ttaatgagta
301 ttttaaaagg gcggtgggtct tagttctata ggtggacgcc ttttcgagat atcgccataa
361 acgtggacca gtggtgactc tagaatttgt ttgtactata tgggtatcaa atgaaagggtg
421 ttaatgagta ttttagaagg gagtgggcct tagttctata ggtggacgcc ttttcggaat
481 atcgttataa aagtggacct gggttgactc tagaatgcgt ttgtacaata tgggtgtcaa
541 acgaaaagtg taataagtgt tttaaaaggg agtgggcctt tgttctatgg gtgaacgcct
601 tttcgggata tcgccataaa cgtggaccag gggtgactct agaatgcgtt tgtacaatat
661 gggatatcaa tgaaagggtc taatgagtat tttaaaaggg aatgggcctt agttctatag
721 gcggacggct tttcgagata tcgccataaa ggtggaccag gggtgactct agaatttggtt
781 tgtacgatat gggatatcaa tgaaatgtgt taatgagtat tttaaaaggg agtgggcctt
841 agttctatag gtggacgcct tttctggata tcgccatata ggtggaccag gggcgacttt
901 agaatttggt tacgatatgg gtatcaaatt aaagggtgta atgagtat ttaaagggat
961 tgggccttag ttttataggt ggacgccttt tcgggatatc gttataaagg tggaccaggg
1021 ttgactctag aatgcgtttg tacattatga gtatcaaacg aaagggtgata atgatttttt
1081 taaaagggag tggaccttag ttctatatatt cgatatatcg aaataaaggg ggaccagggg
1141 tgactctata atgtgtttgt acaatatggg tgtcaaatta aaggatttaa taagaatttt
1201 aaaagggagt tgtggtagtt gcatatgtga aggcgttttc gagatttcga ccaaaatgtg
1261 gaccaggggtg acccagaata taatctgtcg ggtaccgcta atttatttat atatgtaata
1321 ctacgaacag tattcctgcc atgattctaa ggcctttcga tttcgccctg cagaactttt
1381 taatttttct ctacttaata tggtaggtgt caccattttt acaaagtttt tttctaaagt
1441 tatattttgc gtcaataaac caatgcaatt accatgtttc atcccttttt tcgtatttgg

```

|      |             |             |             |             |             |            |
|------|-------------|-------------|-------------|-------------|-------------|------------|
| 1501 | tatagaatta  | tggcattttt  | ttcatttttc  | gtattttttc  | aaatcgaaaa  | agtgggctg  |
| 1561 | gtcatagtcg  | gatttcggcc  | atTTTTtata  | cgaatacaaa  | gtgtgttcag  | ataaatatgt |
| 1621 | gaactgagtt  | tagtaaagat  | ataticgattt | ttgctcaagt  | tatcgtgtta  | acggccgagc |
| 1681 | ggaaggacag  | acgatctact  | gtgtataaaa  | actgggctg   | gcttcaacgg  | atTTcgcct  |
| 1741 | ttttcacaga  | aaacagttat  | cgtcctagat  | tctaagcgcc  | taccaaattt  | cactaggatt |
| 1801 | ggtaaataatt | tgttcgactt  | atggcattaa  | atgtatccta  | gacaaatcaa  | atgaaaaagg |
| 1861 | gcgagaccac  | gcccattttg  | aaaaattctt  | ttgtttttgt  | atTTtgttgc  | accatatcat |
| 1921 | tactgaagtt  | aaatgttgac  | ataatttact  | tataaagata  | ttaaattttt  | tgtaaaaatt |
| 1981 | tcacttaaaa  | aaaatttttt  | tctaagtggg  | cgtgggtcgt  | ctccgatttt  | gctaattttt |
| 2041 | attaagcgta  | cttatagtag  | tacaagtaac  | gttcctgcca  | aatttcatca  | taatatcttc |
| 2101 | aacggctgcc  | aaattacagc  | ttgcaaaact  | tctaaattac  | cttcttttaa  | aagtggcg   |
| 2161 | tgccacgccc  | attgtccaaa  | atTTtactta  | ttttctattc  | tgcgtcataa  | gttcaaccca |
| 2221 | cgtaccaagt  | ttcatcgctt  | tcatccgtct  | ttggtaatga  | attattgcac  | tttttcgatt |
| 2281 | tttcgaaatt  | ttcgatatcg  | aaaaagtggg  | cgtgggtata  | gtccgatatc  | gttcatttta |
| 2341 | aatagcgatc  | tgagatgagt  | gcccaggaac  | ctacatacaa  | aatttcgtca  | agatacctca |
| 2401 | aaattttctc  | aagttatcgt  | gttaacggac  | ggacggacgg  | acggacatgg  | ctcaatcaaa |
| 2461 | ttttttttcg  | atactgatga  | ttttgatata  | tggaaagtcta | tatctatctc  | gattccttta |
| 2521 | tacctgtaca  | accaacggtt  | atccaatcaa  | agttaatata  | ctctgtgagc  | tctgctcaac |
| 2581 | tgagtataaa  | aatagggtca  | aaaatttcag  | atgctgttgc  | acatgaaact  | gcatagtttt |
| 2641 | gaccttgctg  | ttcgtggcat  | ttcccaaaaa  | atgaatacct  | ccaccaggt   | ttaaattcgt |
| 2701 | ctaaatctaa  | atattttgct  | acataattcaa | cagcagtggg  | gccattgcta  | aaagatcctc |
| 2761 | cttgataaaa  | agggtcacat  | aactttacgc  | tttttgcaaa  | ggagaagtta  | tttaaaattc |
| 2821 | caatgatttc  | gccattatcg  | gataaactat  | caccagaac   | ataaaaaatt  | ctatactttg |
| 2881 | aattagaatt  | gtcatttttg  | tttgtcataa  | tatttaccgt  | agattagcat  | gttgtttcat |
| 2941 | tagattcata  | aaaaaaaaata | gcggtgcaac  | ttttttgcaa  | ccccattttt  | aaactttatt |
| 3001 | ttaaaaacgc  | tctgactttt  | tctccacttt  | ttccgggcaa  | aatcagcttc  | ttcttaactt |
| 3061 | gacacgtata  | cttaaaagaa  | ccctctagcg  | cggtttggt   | gtttcaactt  | gcgcagtgc  |
| 3121 | tttgcttcta  | tttgccaat   | tctctcacgt  | gttacattaa  | aaatttttcc  | tacttcttct |
| 3181 | aaggatatgct | ccttcccatc  | tttaccagg   | ccaaaacgca  | ttcttagaat  | tcttttttcc |
| 3241 | tttggtgtta  | aagttgcaag  | aacactgggt  | gtaatgccac  | gcaagtcagc  | aagtattgta |
| 3301 | gcacccctctg | gtctggagac  | tcgcttatct  | tctatacaat  | caccgaagg   | actactatca |
| 3361 | tccttttctg  | ttggagcttc  | aagacttact  | gggtcccttg  | ctattttcat  | aactttgcat |
| 3421 | attctttcca  | gtggcattgt  | cagttctaca  | cttaattcct  | ctaacgtcgg  | ctctcttccc |
| 3481 | atctcatgag  | tcatttttct  | taatgcacca  | aatagcattg  | tatataatat  | tatcccagag |
| 3541 | gcaataatta  | ttcctgcttg  | aaaacctcca  | cccgagtggt  | aatcaccgtg  | aatgaaatg  |
| 3601 | ataaaaggta  | tcatacaaaa  | gtaaggaagg  | ttaagttcgg  | gtgtaaccga  | acattacata |
| 3661 | ctcagttgag  | agctatggtg  | acaacataag  | ggaaaataac  | catgtaggaa  | aatgaaccga |
| 3721 | gggaaaccct  | ggaatgtgtt  | tgtatgacat  | gtgtatcaaa  | tgaaaggcat  | taaagagtat |
| 3781 | tttatgaggg  | agtgggccat  | atTTtctatag | gtggacgcca  | tttagggata  | tagccataaa |
| 3841 | ggtggatcag  | ggttgactct  | agaatgcgtt  | tgtacgatata | gggtatcaaa  | tgaaaggat  |
| 3901 | taatgagtat  | tttaaaagg   | agtggacct   | agttctatag  | atggacgcct  | tttcgagata |
| 3961 | tcgccgtaaa  | gatggaccag  | gggtaactct  | agaatgcgtt  | tgtacgatata | gggtatcaaa |
| 4021 | tgaaagggtg  | taatgagcat  | tttaaaagg   | agtaatcctt  | agttccatag  | gtggacgccg |
| 4081 | tttcgagata  | tcgccataaa  | ggtggaccag  | gggtgacgct  | agaatttgtt  | tgtgcaatat |
| 4141 | gggtatcaaa  | cgaaaggagt  | taatgagtat  | tttaagagg   | agtggagcta  | agttctatag |
| 4201 | atggacgcct  | tttcgagata  | tcgccgtaaa  | gatggaccag  | gggtaactct  | agaatgcgtt |
| 4261 | tgtacgatata | gggtatcaaa  | tgaaagggtg  | taatgagcat  | tttaaaagg   | agtaatcctt |
| 4321 | agttccatag  | gtggacgccg  | tttcgagata  | tcgccataaa  | ggtggaccag  | gggtgactct |
| 4381 | agactttgtt  | tgtacgatata | gggtatcaaa  | tgaaagggtg  | taatgagtat  | ttttaaaagg |
| 4441 | gagtgggcct  | tggttttata  | ggtgttcgcc  | ttttcgagat  | atcgccataa  | acgtgcacca |
| 4501 | ggggtgactt  | tagaatttgt  | ttgtatgaca  | tgggtatcaa  | atgaaagggtg | ttaatgatta |
| 4561 | ttttaaaagg  | gcgtggggct  | tagttctata  | ggtggacccc  | ttttcgagat  | atctccataa |
| 4621 | aggtggacca  | ggggtgactc  | tagaattcgt  | ttgtgcaata  | tgggtatcaa  | acgaaaggag |
| 4681 | ttaatgagta  | ttttaagagg  | gagtgggcct  | tagttctata  | ggtggacgcc  | gtttcgagat |
| 4741 | atcgccataa  | aggtgggcca  | ggggtgactc  | tagaattcgt  | ttgtgcaata  | tgggtatcaa |
| 4801 | acgaaaggag  | ttaatgagta  | ttttaagagg  | gagtgggcct  | ttctggacca  | ggggtgactc |
| 4861 | tagactttgt  | ttgtacgata  | tgggtatcaa  | atgaaagggtg | ttaatgagta  | tttttaaaag |
| 4921 | ggagtgggcc  | ttcgttctat  | aggtgttcgc  | cttttcgaaa  | tatcgccata  | aagggtgacc |
| 4981 | aggggtgact  | ctagaatgag  | tttgtacgat  | atgggtatca  | aattaaagg   | attaatgaga |
| 5041 | gttttaaaag  | ggagtgggtg  | tagttgtata  | tgtgaaggcg  | ttttccagat  | atcgacccaa |

|      |             |             |             |             |             |             |
|------|-------------|-------------|-------------|-------------|-------------|-------------|
| 5101 | atgttgacca  | gggtgacca   | gaacatcatc  | tgttgatatac | cgctaatttta | tttatatatg  |
| 5161 | taatacctgc  | caagattttta | aggggtttttt | atctcgccct  | gcagaactttt | ttcattttct  |
| 5221 | tctacttaat  | atggttaggtg | tcacaaccat  | tttataaagt  | tttttctaaa  | gttatatttc  |
| 5281 | gcgtcaataa  | aacaatccaa  | ttaccttacc  | atatttcatc  | ccttttttcg  | tatttggtat  |
| 5341 | agaattatgg  | caattttttc  | atttttcgta  | attttcgata  | tcgaaaaagt  | gggctggtc   |
| 5401 | atagtcggat  | ttcgttcatt  | tttcatacca  | agataaagtg  | agttcagata  | agtacgtgaa  |
| 5461 | ctgagtttag  | taaagatata  | tcgagttttg  | ctcaagttat  | cgtgttaacg  | gccatgcgga  |
| 5521 | agggcagacg  | gacgactgtg  | tataaaaact  | gggcgtgaca  | tcaaccgatt  | tcgcccattt  |
| 5581 | tcacagaaaa  | cagttaacgc  | cataaaaatat | atgcccctac  | caaatttcaa  | aaggattggg  |
| 5641 | taattttttgt | ttgacttatg  | gcgttaaaaag | tatcctagac  | aaattaaatg  | aaaaagggcg  |
| 5701 | gagccacgcc  | cattttttaa  | ttttcttttg  | tttttgattt  | ttgttgcacc  | atatcattac  |
| 5761 | tggagttgaa  | tcttgacata  | atttacatat  | atactgtaaa  | gatattaaat  | tttttgtaa   |
| 5821 | aattttactt  | taaaaaaatt  | ttttttttaa  | gtgggcgtgg  | tccttctccg  | attttgctaa  |
| 5881 | tttttattaa  | gcgtatatata | agtaataaga  | gtaacgttcg  | tgccaaattt  | catcatgata  |
| 5941 | tcttcaacga  | ctgccaaatt  | acagcttgca  | aattttttaa  | ttaccttctt  | ttaaaagtgg  |
| 6001 | gcggtgccac  | gccattgtc   | caaaatttta  | ctaattttct  | attttgcgtc  | ataagtcaa   |
| 6061 | ctcatctacc  | aagtttcgtc  | gctttatcgg  | tcttttgtaa  | tgaattatcg  | cactttttcg  |
| 6121 | gtttttcgaa  | attttcgata  | tcgaaaaagt  | gggcgtgggt  | atagtcggat  | atcgttcatt  |
| 6181 | ttaaatagcg  | atctgagatg  | agtgtcagg   | aacctacata  | ccaaatttca  | tcaagatacc  |
| 6241 | tcaaaattta  | ctcaagttat  | cgtgttaacg  | gacggacgga  | cggacggacg  | gacggacgga  |
| 6301 | catggctcaa  | tcaaattttt  | atggaagtct  | atatctatct  | cgattccttt  | atatatgtac  |
| 6361 | aaccaaccgt  | tatccaatca  | aacttaatat  | actctgtgag  | ctctgctcaa  | ctgagtataa  |
| 6421 | aaatgttact  | gcatttaata  | tcggatcttt  | aatcattgtc  | tttttcttct  | tttaatatca  |
| 6481 | acgttatata  | aagcgcagca  | gtaaaaacta  | ctatagtttc  | tccaaacgtg  | tcataaccac  |
| 6541 | gaaagcttgc  | caaaacagct  | gtcactatat  | taggaatacc  | ggtagctttt  | tcggtatttt  |
| 6601 | ccacataata  | aggagcaatc  | ataaaatatg  | acaaacatac  | agccagaaat  | aacataaaaa  |
| 6661 | aaagcgttat  | aggggttatga | gatagattta  | ctttatgatt  | ctttatcaag  | gagaatgctg  |
| 6721 | caaacgtaaa  | aaatcgtagt  | gagccctaca  | ccaacagaag  | cttcagtaat  | tgcaacatca  |
| 6781 | ggtgcattca  | taattaagta  | tataagcgca  | ataagtgaac  | taaatacaca  | cattagaaca  |
| 6841 | gcacttacga  | ctaaatgtcg  | cgagaagact  | ataaaaaccg  | taactgttag  | taacaacaaa  |
| 6901 | agtagcacta  | catttaatat  | ttctaacacc  | ttaaccttct  | ttaacagttt  | ttttcttaac  |
| 6961 | tttataataa  | gtgcgcgcta  | aaatatagcc  | acttggtgag  | ctagctaccc  | atattacaag  |
| 7021 | aattaataat  | attatttttaa | cagtattgat  | tgaaaatcca  | ttctgcaaag  | caaaaccaat  |
| 7081 | taacaatagc  | gttgccaccgc | tagaatctgt  | aatacctgct  | gcatgtaacc  | tagtaaagaa  |
| 7141 | atcacgaaat  | ctaattactc  | ccacacttga  | aatgattact  | gaacaaatgc  | ctaaaaatat  |
| 7201 | agaacggat   | cctatcataa  | attattaaaa  | caacattaat  | acatctactg  | atctaaattg  |
| 7261 | ctcttttaaat | aacataatat  | ctttgcttcg  | cagcgctgta  | atatattggg  | acatgacttt  |
| 7321 | ctctgctgat  | aaatatacta  | cttttctttt  | ttctgatggg  | gaattgacta  | tgtgccaggc  |
| 7381 | tatagcatgc  | attagatgtg  | ttttaccaag  | ttccactcca  | ccatatagaa  | acaaaggatt  |
| 7441 | gctgccta    | attggatcta  | tagattctgc  | cacacgcttt  | gccgccgtaa  | atgctaattc  |
| 7501 | atgttgcttt  | cccactacaa  | aattatcaaa  | ggtgaacctt  | ggatccagcg  | gcgaacgaag  |
| 7561 | attatgatta  | ctttcctctc  | tgtttttttag | tataacatta  | aaatttgaat  | tcctttcctc  |
| 7621 | aattacatga  | atatcaatag  | aacgtatgct  | tttatcttcg  | ctttgccata  | atgataatat  |
| 7681 | ttttttcatg  | taatgaactg  | taatccctta  | ataaatacta  | aaaatttatg  | tgattttttg  |
| 7741 | atgagttgta  | aaggggtataa | aaacactaaa  | attgatcatt  | tttatttcaa  | aaaaatgaaa  |
| 7801 | aatttgtaaa  | tgctgccttg  | atcgaggatt  | agaagcatgc  | tattaaaaat  | agtaacacat  |
| 7861 | taacaattac  | ttactgaagt  | agtacaaaaa  | cttggttagga | acgtttcttt  | taaaacaaag  |
| 7921 | ccttattttg  | atagagcagg  | cagtgcatta  | aatgtgcatg  | ttaatctcgt  | gaattcaaat  |
| 7981 | aacgataact  | tatttttatat | caatgagcaa  | aagtatagtg  | attattttgat | tcatagtata  |
| 8041 | ggcggattat  | gtgcaatgat  | gaaaaaacat  | atgttggttt  | ttgctccaaa  | tgatgattca  |
| 8101 | catttaagat  | ttcagtagcc  | ggatattcac  | actccaaacta | cgattagtgt  | gggagtaa    |
| 8161 | aacagaactg  | ctgcgatagc  | aattccctat  | tttggaacag  | attccaaaag  | atgccgccta  |
| 8221 | gaacaccgtg  | ttcctggagc  | agactgtaac  | cttgaaaaag  | tactcacagc  | aataattgaa  |
| 8281 | ggtatagttt  | ttggtataga  | gaacaaaatt  | tctccgccaa  | ataggggtct  | cggcattgca  |
| 8341 | tctgattctc  | aatataagat  | gaagagtttg  | atatgaactc  | taaccacggt  | gggttaacaat |
| 8401 | atcttccata  | gttagccgct  | ctggcattct  | tattaagtta  | tcactgaaaa  | aagtcctcgg  |
| 8461 | agcattggta  | agttctttga  | tttttttttca | tatccattca  | tatgcatagg  | aggggatcac  |
| 8521 | attaagtcca  | tatagttcgt  | tgcgatattt  | gtccgacttg  | tatcatcagc  | attagtgcgt  |
| 8581 | ttagaaagtg  | aattaccttt  | gaaatccata  | tgttcaggta  | gtccattttt  | catttcttct  |
| 8641 | tgtgctcttt  | tatttttttaa | ttcttctgct  | agctcagttt  | cagttctttt  | tggttctttt  |

```

8701 acggatatattt ccgtatcttt ttcttcacct ttatcttctg aaacacgagt aatttcagct
8761 ttagttcttta ttttatgaat cagcaaaagt aataagtaag taactgcagc agcagaaacg
8821 ataatggcta tctttgcggc aatgtggatt gctgataaag ctccagctaa tccagacaca
8881 ataacttttc tcttgccctt tgttacattt aaaattgcc aataataaac ctctcaaata
8941 ctgttctaga attattacac agaacttttc ttatacgata tatacttata tgataaaagt
9001 aattacctat tgttcgctgc tgctgaggct ttagaaagag atttatttaa tcaatacaag
9061 cttatatcaa gtaatgtata tgttacttta acttcaagta aggtgaaata catatctcag
9121 aataaagaac ataacagcaa acgtctgttg gtgaataatt ttgatgaact gctccattta
9181 ataaactggt caaaggaaga ttgcataaga gggttgcaat gctcaaagac aatagatgaa
9241 tgtgctattg ccttgcttaa gttctcagaa ttattgccat acgcgttagt ggctgatatg
9301 acttttgaga ataaccatga aatgcgaaat tggcgcgaga aaaatgacgt tattgcactg
9361 gacacgtcat tcataaataa ttttcaagaa aatcaggatg tatatgaagt gtgcaaaaca
9421 tcgttatttt taaaacagac tcaagaagta aatatcatat cttatagaac agaaagtggg
9481 ggaagagaac atcatgcaat tatcattggc aatccagata aagatggcga accctaaagg
9541 ttcaatcttc gtgctatacg ggtgacttgt tagatagttt atcatgcatg tgcagaagtc
9601 agttacatca agcaattcaa atgatagctg actctggaag tggattataa ttgtatttga
9661 tgcaagatgg aagaggcatt ggtttaacta ataagttaag agcttacagt gtgcaaagag
9721 gacataatct tgatactggt gatgcaaaac gaatattagg ttttgaagat gatgaaagga
9781 gttttgctgt tgcagctaaa atgcttaata aattgaacat taacaaaatc caaacactta
9841 caaacaatga taggaaattg tcagaattgg aaagtagtgg tataggagtt acaaagtgtc
9901 taccacttat tgtggaacgt aataaatata acgattcata tatggagaca aagtttggtg
9961 agctaggcca tagattaaga gtttttttag cttttttggt gtaactactt tgttaatttg
10021 ctatgtttat taacataagt taagattttt aggaataact aaatgctaag attttttaag
10081 cgagaaaaaa atactgaagg atatagattg gaattcaaac cgctacagca cagttattgc
10141 tcaaaggaat attctacttt tatttccatt aatattatta gcaacgatct ctatcagcat
10201 attagtcata tttaaaatta gcacaagtag cactattgag ccatttggtt tagaaattga
10261 caagaaatca ggaatagtg aattgggttg tcctatcaca gtaaaacaat attctgcaaa
10321 tgaagcgcta aacgtttatt ttatttcaga gtatataaaa gcaagggagg tttttgatcc
10381 atatcattat aattataact attatacaaa ggtgagggtg ttttcctcac ctaatgtgta
10441 taatgaattt agaaattatg taggatcaca gaatatggat gatcttttta atttgtactc
10501 agataccaaa agtgaattta taattcgctc aattcaaaaa ttgggtaacg atgctcttca
10561 ggtgagggtt tttgtggaat ttatacggaa agatggaagt tccacaagaa aaaataagat
10621 agatattatg tcatatagat tatgtgcata gcttgaaatg gatgatcagc aaagatatat
10681 taaccattta ggatttcaag ttatttcata tagagtagat gatgaatatg tataggatat
10741 tattagtttt agctttactt gtaagtggca atttaaacac atccattaat tataatgagc
10801 ctatttctgt agatagtata ataaagactt ttgtgtatag ccctaataaa gtattttacg
10861 tggtttatag tcaggggttac tattcttata ttgaatttgc ggaaggagaa aaagttaaaa
10921 atatcgctgt tgggtgatgca tcaagttgga aaattaatcc ttatgacaat aaattgctta
10981 tcatgccatt tgaagttagt agtcgcacta acatgattat tacaacaact aaaaaagaa
11041 attacatttt tgatttaatc taaaggccaa accacgataa ataccagat actgatgcta
11101 agaaagtggg tcacgattat tctgctgaaa aggatatatc ttacgtagga cgtttttatt
11161 atcctcaaga agaaggtgaa tttgatcttg atttagatga ggtttcttta actactcaaa
11221 tgcaatatac tacagacaag ccagaaaaaa taatacaaga aaatgatacg aagtacaatt
11281 atacatatac tgatgaagct ggtaatacgg attgagctat tgatgatgat tgtttttggt
11341 tttattttta atttagaaat aataataaaa tacctcagat ttttgtagaa gaggataaac
11401 cttgtaaaag gctgttattt gatgattatg ttataataaa aggagtacat aaaaagctat
11461 ttatgcgtta tgaagatggt gaagttgaaa ttataaatag gtcactttaa ctgtggtaga
11521 tgcaaaat

```

//

```

LOCUS      JAQZAU010000096      27315 bp      dna      linear      ENV 17-MAR-2023
DEFINITION MAG: Wolbachia pipientis isolate wEsol contig_48052, whole genome
            shotgun sequence.
ACCESSION  JAQZAU010000096  JAQZAU010000000
VERSION    JAQZAU010000096.1
DBLINK     BioProject: PRJNA929258
            BioSample: SAMN33142973
KEYWORDS   WGS; ENV; Metagenome Assembled Genome; MAG.
SOURCE     Wolbachia pipientis (insect metagenome)
ORGANISM   Wolbachia pipientis
            Bacteria; Pseudomonadota; Alphaproteobacteria; Rickettsiales;

```

```

REFERENCE 1 (bases 1 to 27315)
AUTHORS  Fiutek,N., Couger,B.M., Roy,S., de la Torre,J.R. and Connor,E.F.
TITLE     Genomic assessment of the contribution of the Wolbachia
          endosymbiont of Eurosta solidaginis to gall-induction
JOURNAL   International Journal Molecular Sciences
REFERENCE 2 (bases 1 to 27315)
AUTHORS  Fiutek,N., Couger,B.M., Roy,S., de la Torre,J.R. and Connor,E.F.
TITLE     Direct Submission
JOURNAL   Submitted (10-FEB-2023) Biology, San Francisco State University,
          1600 Holloway Ave, San Francisco, CA 94132, USA
COMMENT   ##Genome-Assembly-Data-START##
          Assembly Date      :: JUN-2019
          Assembly Method    :: FLYE v. 06-2019
          Genome Representation :: Full
          Expected Final Version :: Yes
          Genome Coverage    :: 100.0x
          Sequencing Technology :: Illumina HiSeq; PacBio Sequel
          ##Genome-Assembly-Data-END##
FEATURES
    source      Location/Qualifiers
                1..27315
                /organism="Wolbachia pipientis"
                /mol_type="genomic DNA"
                /submitter_seqid="contig_48052"
                /isolate="wEsol"
                /isolation_source="galls on Solidago altissima"
                /host="Eurosta solidaginis MN-2018-EFC"
                /db_xref="taxon:955"
                /environmental_sample
                /country="USA: Cowling Arboretum, Carleton College,
                Northfield, MN"
                /lat_lon="44.48 N 93.13 W"
                /altitude="280 m"
                /collection_date="2018-11"
                /metagenome_source="insect metagenome"
                /note="metagenomic"
    gene        complement(12..431)
                /locus_tag="wEsol_01062"
    CDS         complement(12..431)
                /locus_tag="wEsol_01062"
                /codon_start=1
                /transl_table=11
                /fullproduct="qcoverage 100 , hcoverage 100 , similarity
                100 , identity 100 , evalue 7.50e-88 , alnlength 139 ,
                Bacteria , Proteobacteria , WP_015588794.1 MULTISPECIES:
                DedA family protein [unclassified Wolbachia]"
                /cog="COG1238 COG1238 161 Predicted membrane protein"
                /pfam="Voltage_CLC Pfam-B_9633 SNARE_assoc"
                /product="DedA family
                protein"
                /translation="MENYFLLFTDSLIVSSLVLPPIHQGFVFNMTMLYFRSYYTPLLMLFF
                GVLGSSLGGIVNWYLGRLTISRKSYRKLNEHKTPKIVKNLLICAVTLLSWVPALGS
                VIQILSGYFKLNLYILAPLIILSNFLYLLYLILTFGV"
                /besthit="qcoverage 100 , hcoverage 100 , similarity 100
                , identity 100 , evalue 7.50e-88 , alnlength 139 ,
                Bacteria , Proteobacteria , WP_015588794.1 MULTISPECIES:
                DedA family protein [unclassified Wolbachia]"
    gene        complement(438..1811)
                /locus_tag="wEsol_01063"
    CDS         complement(438..1811)

```

```

/locus_tag="wEsol_01063"
/codon_start=1
/transl_table=11
/fullproduct="qcoverage 100 , hcoverage 100 , similarity
100 , identity 100 , evaluate 0.0 , alnlength 457 ,
Bacteria , Proteobacteria , WP_174516857.1 MULTISPECIES:
cysteine--tRNA ligase [unclassified Wolbachia]"
/cog="CysS COG0215 464 CysteinyI-tRNA synthetase"
/pfam="tRNA-synt_1e tRNA-synt_1g tRNA-synt_1g
tRNA-synt_1f DALR_2 Pfam-B_15993 Pfam-B_8989 Pfam-B_14782
Pfam-B_12676"
/tigr="TIGR00435 cysS 466 cysteine--tRNA ligase"
/product="cysteine--tRNA
ligase"
/translation="MVRLYNLTLTKKKELFTPIDKDHVKMYVCGPTVYDTAHIGNARSV
VYVDVLFQLLKFCYGVYTVRNITDIDDKIINAASEKNSNIESITTYIYKAFHDDMES
INCKKPTYEPKATENVDYIIKLTIEHLLQSGHAYESDKHVYFNIESYHEYGALSGKKTD
ELVPGSRVEVNENKKHPGDFVLWKPANDIDYKLSSYWNSPWGEGRPGWHIECSAMSYA
YLKDFDIHGGGIDLQFPHENEIAQSKSAFAGSMFAKYWIHNGFLTVEEKMSKSLF
NIVKVRDLDSGIKGEVIRYALLKTHYRKPLDWTENVISDAQETLNKFYRLRLGLDTI
SIDESNAEISKDFIDALKNDLNIPEALAILHEMAKINKMSNESEKLLKLTESFVK SAR
FIGLLESSYQEWFTAGVSHQEIERLIDLRAAKQNKDYNTADKIRDQLKQMGITISDN
EDGTTTW"
/besthit="qcoverage 100 , hcoverage 100 , similarity 100
, identity 100 , evaluate 0.0 , alnlength 457 , Bacteria ,
Proteobacteria , WP_174516857.1 MULTISPECIES:
cysteine--tRNA ligase [unclassified Wolbachia]"
gene complement(1804..2460)
/locus_tag="wEsol_01064"
CDS complement(1804..2460)
/locus_tag="wEsol_01064"
/codon_start=1
/transl_table=11
/fullproduct="qcoverage 100 , hcoverage 100 , similarity
99.5 , identity 99.5 , evaluate 8.01e-142 , alnlength 218 ,
Bacteria , Proteobacteria , WP_015588796.1
exopolysaccharide biosynthesis protein [Wolbachia
endosymbiont of Drosophila simulans]"
/cog="COG3932 COG3932 209 Uncharacterized ABC-type
transport system, permease components"
/pfam="ExoD"
/product="exopolysaccharide biosynthesis
protein"
/translation="MSKNDKLTSDKLASDILKEVADTNNNDSKVTLFDIKTALHER
GFGILIIIFSLPLSVPIPVPPGYTTILSIPLILFSLQLLFGFDSPWMPHWLERRSFQR
STLALVVEKTSPALKKIEKFMRPRMSFIFYGPGEKILAFIMLLCALSIALPLPLTNFI
PAIGTTLISLGIMSKDGFLSILGVLISLCGLLLTLVVVVKGPQLIIGAFSFLKSFVYG
"
/besthit="qcoverage 100 , hcoverage 100 , similarity 99.5
, identity 99.5 , evaluate 8.01e-142 , alnlength 218 ,
Bacteria , Proteobacteria , WP_015588796.1
exopolysaccharide biosynthesis protein [Wolbachia
endosymbiont of Drosophila simulans]"
gene complement(2551..3207)
/locus_tag="wEsol_01065"
CDS complement(2551..3207)
/locus_tag="wEsol_01065"
/codon_start=1
/transl_table=11
/fullproduct="qcoverage 100 , hcoverage 100 , similarity

```

```

100 , identity 100 , evalue 1.88e-140 , alnlength 218 ,
Bacteria , Proteobacteria , WP_010962397.1 MULTISPECIES:
exopolysaccharide biosynthesis protein [Wolbachia]"
/cog="COG3932 COG3932 209 Uncharacterized ABC-type
transport system, permease components"
/pfam="ExoD"
/product="exopolysaccharide
biosynthesis protein"
/translation="MQKSEKLTkdkKLASDILKEVADTNNNDSNKVTLFDIKTALHER
GFGILIIIFSLPLSVPIPVPPGYTTILSIPLILFSLQLLFGFDSPWMPSWLERRSFQR
STLALVVEKTSPVLEKIEKFMKPRLSFIFYGPGEKILAFMMLLCAIIIALPLPFTHFL
PAIGTTLISLSIMSKDGFLSILGVLVSLCALLLTLVVIVKGPQLITGALSLLKSFTTL
"

/besthit="qcoverage 100 , hcoverage 100 , similarity 100
, identity 100 , evalue 1.88e-140 , alnlength 218 ,
Bacteria , Proteobacteria , WP_010962397.1 MULTISPECIES:
exopolysaccharide biosynthesis protein [Wolbachia]"
gene complement(3374..3541)
/locus_tag="wEsol_01066"
CDS complement(3374..3541)
/locus_tag="wEsol_01066"
/codon_start=1
/transl_table=11
/fullproduct="qcoverage 100 , hcoverage 100 , similarity
100 , identity 100 , evalue 3.14e-28 , alnlength 55 ,
Bacteria , Proteobacteria , WP_006013840.1 MULTISPECIES:
twin-arginine translocase TatA/TatE family subunit
[Wolbachia]"
/cog="TatA COG1826 94 Sec-independent protein secretion
pathway components"
/pfam="MttA_Hcf106"
/tigr="TIGR01411 tatAE 47 twin arginine-targeting protein
translocase, TatA/E family"
/product="twin-arginine
translocase TatA/TatE family subunit"
/translation="MSLGPWQLFLVLIIILVLFAGRLPQVMGDLGKGIKNLKQELKD
SEKLSSNEPDR"
/besthit="qcoverage 100 , hcoverage 100 , similarity 100
, identity 100 , evalue 3.14e-28 , alnlength 55 ,
Bacteria , Proteobacteria , WP_006013840.1 MULTISPECIES:
twin-arginine translocase TatA/TatE family subunit
[Wolbachia]"
gene complement(3670..4443)
/locus_tag="wEsol_01067"
CDS complement(3670..4443)
/locus_tag="wEsol_01067"
/codon_start=1
/transl_table=11
/fullproduct="qcoverage 100 , hcoverage 100 , similarity
100 , identity 100 , evalue 2.50e-178 , alnlength 257 ,
Bacteria , Proteobacteria , WP_141456795.1 MULTISPECIES:
ABC transporter ATP-binding protein [unclassified
Wolbachia]"
/cog="PotA COG3842 352 ABC-type spermidine/putrescine
transport systems, ATPase components"
/pfam="AAA_23 DUF258 AAA_15 SMC_N AAA_29 AAA_21 AAA_33
AAA ABC_tran AAA_21 AAA_15 Pfam-B_17981 Pfam-B_15070"
/tigr="TIGR03265 PhnT2_353 putative
2-aminoethylphosphonate ABC transporter, ATP-binding
protein"

```

```

/product="ABC transporter
ATP-binding protein"
/translation="MLVNNIGYFYNNQNDFALSNINIKVKKGNVACLLGHSGCGKSTI
LKLIAGIENPKSGTIFINDRLVASNKASVAIEHRNIGLIFQHSALFPHKTVVENITFA
IRSSSKREKHLIALEILKLLNIEKYENMYPNALSGGQQQLVAIARVMAQNPDVLLDE
PFSNLDILLKCRIRQHILSLFRSKNIPVLMVTHDPQEALKVADFIYVMKNGKIIQSGV
SSDIYHRPQDDTLAKFFSELSSTLQLSEKFPLIRCKKII"
/besthit="qcoverage 100 , hcoverage 100 , similarity 100
, identity 100 , evalue 2.50e-178 , alnlength 257 ,
Bacteria , Proteobacteria , WP_141456795.1 MULTISPECIES:
ABC transporter ATP-binding protein [unclassified
Wolbachia]"
gene complement(4762..6579)
/locus_tag="wEsol_01068"
CDS complement(4762..6579)
/locus_tag="wEsol_01068"
/codon_start=1
/transl_table=11
/fullproduct="qcoverage 100 , hcoverage 100 , similarity
100 , identity 99.8 , evalue 0.0 , alnlength 605 ,
Bacteria , Proteobacteria , WP_174516859.1 MULTISPECIES:
excinuclease ABC subunit UvrC [unclassified Wolbachia]"
/cog="UvrC COG0322 581 Nuclease subunit of the
excinuclease complex"
/pfam="GIY-YIG UVR UvrC_HhH_N Pfam-B_75 HHH_2 HHH HHH_3"
/tigr="TIGR00194 uvrC 574 excinuclease ABC subunit C"
/product="excinuclease ABC
subunit UvrC"
/translation="MLRQYKEQIKSSPQSCGVYKMGVDKNKVLYVGKAKNLKSRLSDY
LQFENLSEIRIVMLLQVIKVEIFITENEIEALLLEAQLIKSLKPLYNIVLKDGFYPY
ITISKHDYPRIAKYRGKFKKNEFHYYGPFTSAAAVKQTILSLQKAFLLRVCSDDQYFSS
TKRPCIEYQIKRCSAPCINKITKDDYCQSVKQARNTLLGRNKEVKEQLLFTMRKCSSE
ENYELAAIYRDRVKFLEQIQIQHTDFSFEKDADFFSIVREEDLACISVLSFRNKDNYG
STPYFAENCGDHSNDEILSTFLVNFYNSANIPPIQIYVPDSIVDKIEIEQALYKVAQK
PVKVLHAKNKKERDLLKFVYDNSQHSLEQKLIDYRNNLEKLEELSKIFLLPNIPKRIE
VYDNSHIFGNQQIGVMVAGQEGFLKSEYRKFTIKEKFSGDDYKMMREVLTRRFSGNI
KGIIPDFLLIDGGPGHVSIVQNVLEVLNINVPFACMAKGPDRNAGNERFYMLGREEFS
LANDSKVMLYLQSLRDEAHRFAITSHRKKRDKQFIVSQLSKIPGIGNKRKKALMSYFG
SVKNISKASLAEIQNVPGISKGLAEVILKHVNYKRGVLE"
/besthit="qcoverage 100 , hcoverage 100 , similarity 100
, identity 99.8 , evalue 0.0 , alnlength 605 , Bacteria ,
Proteobacteria , WP_174516859.1 MULTISPECIES:
excinuclease ABC subunit UvrC [unclassified Wolbachia]"
gene complement(6563..8680)
/locus_tag="wEsol_01069"
CDS complement(6563..8680)
/locus_tag="wEsol_01069"
/codon_start=1
/transl_table=11
/fullproduct="qcoverage 100 , hcoverage 100 , similarity
100 , identity 100 , evalue 0.0 , alnlength 705 ,
Bacteria , Proteobacteria , WP_015588799.1 MULTISPECIES:
glycine--tRNA ligase subunit beta [unclassified
Wolbachia]"
/cog="GlyS COG0751 691 Glycyl-tRNA synthetase, beta
subunit"
/pfam="tRNA_synt_2f DALR 1"
/tigr="TIGR00211 glyS 691 glycine--tRNA ligase, beta
subunit"
/product="glycine--tRNA

```

```

ligase subunit beta"
/translation="MSLQLLFECLSEEIPPRMQNVAVTQVKSCIANVFNKNNVKFTSM
EVFVTARRITLFVDNINALELKDSNNEVKGPINAPKSAIEGFLRKYQKNEEDLLVRK
VNNEDFYFIKRESCSFNIQEFLKNQLGEILKNFSWPKSMRWGKGKERWVRPIKNILCI
LNDEIIPVSFAGITASNTTYGHRFLSSGTALTVKAPKDYFELLEKNSVILQMDKRKQF
ILDQINKFTKEQNLQLEKNDYLLNELTGLIEWPIVLFGEVNQEKSFGLPKEVILSIVN
TQQKYLALSNGKRISHFVTVVNVNNGEVVKGHERILEARLADAQFLISQDKKENLDYY
VKKLGSILFHASLGSVGEKVKRITALSKYIAIFIPHASLIKVERAAYLAKADLATSIV
REFPELQGVMMGGYYASYFQEDKEIVEAITEHYKPIRSEQECPKSPSAIAVSIADKVDS
LVGLIAAGEKISGSYDQFSLRRMTIGIIRTIENNLHVPIRLLIDKSVSLYSKLLFNK
NTTSADKPNRKQISELVFKFCLERFKVILKNRDIRQDVVDSILYKIDINDLLTAEKQT
VILDRYLSTPEGEQILSTYKRVSNNMSKVRKSDGTTYSASYGKRFLIESEEIALSNCA
ITACKNIKQAIKNNHFNVALDELAFAPFINQFMDSVKINCDSDKLRRNRLSLEENVV
SIFHLVADFNLIQVKQWINAQAI"
/besthit="qcoverage 100 , hcoverage 100 , similarity 100
, identity 100 , evalule 0.0 , alnlength 705 , Bacteria ,
Proteobacteria , WP_015588799.1 MULTISPECIES:
glycine--tRNA ligase subunit beta [unclassified
Wolbachia]"
gene complement(8684..9523)
/locus_tag="wEsol_01070"
CDS complement(8684..9523)
/locus_tag="wEsol_01070"
/codon_start=1
/transl_table=11
/fullproduct="qcoverage 100 , hcoverage 100 , similarity
100 , identity 100 , evalule 2.98e-206 , alnlength 279 ,
Bacteria , Proteobacteria , WP_015588800.1 MULTISPECIES:
glycine--tRNA ligase subunit alpha [unclassified
Wolbachia]"
/cog="GlyQ COG0752 298 Glycyl-tRNA synthetase, alpha
subunit"
/pfam="tRNA-synt_2e"
/tigr="TIGR00388 glyQ 293 glycine--tRNA ligase, alpha
subunit"
/product="glycine--tRNA
ligase subunit alpha"
/translation="MNLQSIIEKELQDFWASEGCVILHSYTSEVGAGTLHPATIMSAID
TKPAKIAIYLQPVIRPADGRYSDNPENRLYQHYQYQVVIKPSGNNLQDVYLDLKVGLIS
TEKYDIKFVEDDWENPSVGASGLGWEVTCNGMEVTQLTYIQQVGGIDCKMIPGEVAYG
LERLAMCIQGVNDVYDIIWNDNGVTYGNIFKQREYEFSYLALDYDTKVQVQQQFEDTE
KLCKFLIEKELPMAAYDQCIKTSHELLNLLDARGVLGVNERTAYIGRVRELTKKCCELY
MSK"
/besthit="qcoverage 100 , hcoverage 100 , similarity 100
, identity 100 , evalule 2.98e-206 , alnlength 279 ,
Bacteria , Proteobacteria , WP_015588800.1 MULTISPECIES:
glycine--tRNA ligase subunit alpha [unclassified
Wolbachia]"
gene complement(9596..10327)
/locus_tag="wEsol_01071"
CDS complement(9596..10327)
/locus_tag="wEsol_01071"
/codon_start=1
/transl_table=11
/fullproduct="qcoverage 99.1769547325103 , hcoverage
95.6349206349206 , similarity 100 , identity 100 , evalule
8.79e-165 , alnlength 241 , Bacteria , Proteobacteria ,
WP_138265045.1 MULTISPECIES:
phosphatidylglycerophosphatase [Wolbachia]"
/translation="MGIFFKFLGKMLGKVFPKTVSSLLGIGYLPWQNYWSSFLILF

```

```

IVDVILILTYGGEYLLYKMPDSGIVVAAVFTKLAIVMLVMQLIGIFIFHAQDPSANS
EEIVIQIASGQVLTVALSMPAMMSIYYAVSKLYGNICKQMFQCPFWFNDFMHFFFFLM
IPYVFFNVVEVIKWPPISSIQLSYNNAMSITFEGIFHTFYAVILLYLTAFIFCDLTMH
DAIVLNKSIQYVRESSAVLGDYFT"
/product="
phosphatidylglycerophosphatase"
/besthit="qcoverage 99.1769547325103 , hcoverage
95.6349206349206 , similarity 100 , identity 100 , evaluate
8.79e-165 , alnlength 241 , Bacteria , Proteobacteria ,
WP_138265045.1 MULTISPECIES:
phosphatidylglycerophosphatase [Wolbachia]"
gene complement(10474..11469)
/locus_tag="wEsol_01072"
CDS complement(10474..11469)
/locus_tag="wEsol_01072"
/codon_start=1
/transl_table=11
/fullproduct="qcoverage 100 , hcoverage 100 , similarity
99.7 , identity 99.7 , evaluate 2.34e-236 , alnlength 331 ,
Bacteria , Proteobacteria , WP_015588802.1 MULTISPECIES:
porphobilinogen synthase [unclassified Wolbachia]"
/cog="HemB COG0113 330 Delta-aminolevulinic acid
dehydratase"
/pfam="ALAD"
/product="porphobilinogen
synthase"
/translation="MFNFPNTRLRRRRSSKWVRNLTSENSLSVNDLVLPFVHDREET
TEPISGLPDVKCYSIDGLVSIVKEAKDLGINAVAIFFPVVDSKLKSENAEEAYNSDNL
CRAICAVKLKVPEIGIADIALDSYTIHGHGILKDNQMDVENDETVSILCKQALALA
ASGCDVVAPSDMMDGRIGRIRKSLDDNNFQDVLILSYAVKYCSSFYAPFRQVVGSCGL
SHSIDKSGYQMDYKNAREAMCEIEMDINEGADFIMIKPGMPYLDIKTASDKFNFP
AYQVSGEYAMIKAAANNGWLDYDKVIYESLIGFKRAGASAIPTYAALDIAKNLSA"
/besthit="qcoverage 100 , hcoverage 100 , similarity 99.7
, identity 99.7 , evaluate 2.34e-236 , alnlength 331 ,
Bacteria , Proteobacteria , WP_015588802.1 MULTISPECIES:
porphobilinogen synthase [unclassified Wolbachia]"
gene complement(11462..12487)
/locus_tag="wEsol_01073"
CDS complement(11462..12487)
/locus_tag="wEsol_01073"
/codon_start=1
/transl_table=11
/fullproduct="qcoverage 100 , hcoverage 100 , similarity
100 , identity 100 , evaluate 3.84e-231 , alnlength 341 ,
Bacteria , Proteobacteria , WP_015588803.1 MULTISPECIES:
NADH-quinone oxidoreductase subunit NuoH [Wolbachia]"
/cog="NuoH COG1005 332 NADH:ubiquinone oxidoreductase
subunit 1 (chain H)"
/pfam="NADHdh Peptidase_M50 Pfam-B_9450"
/product="NADH-quinone
oxidoreductase subunit NuoH"
/translation="MNTLVNILFILVPLLLSVAYLTYFERKVLAAIQLRHGPSVVGPF
GLLQPFADAIKLLIKEPIIPFRASTILFIMAPMLTFILALIAWAVIPFGAEVIVENGQ
QVVIPKVIANINVGVLVLAISSLGVGVIAGWSSNSNYAFLGAIRSAAQMISYEVS
IGLIVA AVVITTTGTLNLGEMVVAKHNPFWVDLLLMPIGIIFISLLAETNRHPFDLP
EAEAELVSGYNVEYSSMPFALFFLGEYANMILASAMMTIFFLGGWYPPLELGLLYKIP
GLIWVFLKIIILLFVFIWIRATIPRYRYDQLMRLGWKVFLPISVLWVILISGVLLFTG
NLPGSNV"
/besthit="qcoverage 100 , hcoverage 100 , similarity 100
, identity 100 , evaluate 3.84e-231 , alnlength 341 ,

```

Bacteria , Proteobacteria , WP\_015588803.1 MULTISPECIES:  
 NADH-quinone oxidoreductase subunit NuoH [Wolbachia]"  
 gene complement(12471..14540)  
 /locus\_tag="wEsol\_01074"  
 CDS complement(12471..14540)  
 /locus\_tag="wEsol\_01074"  
 /codon\_start=1  
 /transl\_table=11  
 /fullproduct="qcoverage 100 , hcoverage 100 , similarity  
 99.7 , identity 99.7 , evalue 0.0 , alnlength 689 ,  
 Bacteria , Proteobacteria , AGJ99572.1 NADH-quinone  
 oxidoreductase subunit G [Wolbachia endosymbiont of  
 Drosophila simulans wHa]"  
 /cog="NuoG COG1034 693 NADH dehydrogenase/NADH:ubiquinone  
 oxidoreductase 75 kD subunit (chain G)"  
 /pfam="Fer2\_4 Fer2 NADH-G\_4Fe-4S\_3 Molybdopterin DUF1982"  
 /tigr="TIGR01973 NuoG 606 NADH dehydrogenase (quinone), G  
 subunit"  
 /product="NADH-quinone oxidoreductase subunit  
 G"  
 /translation="MGSCIIIVVVKVTINSKECEVEHGLTIIQACEVVGVEIPRFCYHE  
 RLAIAGNCRMCLVEVEGGPPKPVASCAMPVAEGMVIHTDTPKVKKAREGVLEFLLINH  
 PLDCPICDQGGECDLQDITMAYGKGTSRLDEHKRAVPKKHFGPLIETAMNRCIHCTRC  
 VRFLSDVAGTNELGGIGRGENVEISTYIKRHISSELSGNIIDLCPVGALTSKPYSFTA  
 RPWELSHCETIDVLDVAGSAIRVDYRGPEVMRILPRLSEEVNEEWISDKTRFAYDGLK  
 VQRLDRPYIKKDGKLAPVDWNEALTVAACKLKNTKSNKIAAIAAGDLADCESMLLLKEM  
 MQKLGSGNIDCRQDGAKLIPNNRGSYVFNTTIEGIENADLCLLINTNPRIEAPIINVR  
 LRKRYLQGNFPVASVGPNIIEYLYHVEKLGDNPDILSEIANGNHKFKCKLLSAAQSPMLI  
 IGQDALVRDDSESVLVLAGKIAEKFNMRDDWNGFNMLHKAARVGGDLIGFVPPKKE  
 RDINQILEHAESGEIEVVYLLGADEIDTSKLENTFVIYQGHGDKGAHVADVILPGAA  
 YTEKYATYVNTEGRVQRTNLAVFPPGEAKEDWLI IKNLSQYLDLSLPYDSLFDVRKKL  
 DTIGPQFRNADQVIKNTWVPISNGKINLSNTPFTLKECNFYMTDSISRASKIMADCTK  
 AFYEHAS"  
 /besthit="qcoverage 100 , hcoverage 100 , similarity 99.7  
 , identity 99.7 , evalue 0.0 , alnlength 689 , Bacteria ,  
 Proteobacteria , AGJ99572.1 NADH-quinone oxidoreductase  
 subunit G [Wolbachia endosymbiont of Drosophila simulans  
 wHa]"  
 gene complement(14525..14737)  
 /locus\_tag="wEsol\_01075"  
 CDS complement(14525..14737)  
 /locus\_tag="wEsol\_01075"  
 /codon\_start=1  
 /transl\_table=11  
 /pfam="Pfam-B\_148"  
 /fullproduct="qcoverage 100 , hcoverage 100 , similarity  
 100 , identity 100 , evalue 7.95e-42 , alnlength 70 ,  
 Bacteria , Proteobacteria , WP\_006279675.1 MULTISPECIES:  
 hypothetical protein [Wolbachia]"  
 /translation="MAAGGKAKTASKNNPTQRKKAQKMYKDKPVKPVRYIDRDSRMN  
 YMSAQYDNGNLVEDEVSGNPIKWEAV"  
 /product="hypothetical protein"  
 /besthit="qcoverage 100 , hcoverage 100 , similarity 100  
 , identity 100 , evalue 7.95e-42 , alnlength 70 ,  
 Bacteria , Proteobacteria , WP\_006279675.1 MULTISPECIES:  
 hypothetical protein [Wolbachia]"  
 gene complement(15679..16500)  
 /locus\_tag="wEsol\_01076"  
 CDS complement(15679..16500)  
 /locus\_tag="wEsol\_01076"

```

/codon_start=1
/transl_table=11
/pfam="UDG Pfam-B_7354"
/fullproduct="qcoverage 100 , hcoverage 100 , similarity
99.6 , identity 99.6 , evalue 4.55e-198 , alnlength 273 ,
Bacteria , Proteobacteria , WP_015588805.1 MULTISPECIES:
uracil-DNA glycosylase [unclassified Wolbachia]"
/translation="MSNKDLELLKIFYHEVGVDCTLMEGEEEEKKLESKESVQPSVIQTG
TQKKDADTHWGDTKDGKDMFSDWIIIEARKLAGKCGSVDELRSVKSFEFGCEIKKTAT
NTVFSDGNPNKIMLVGEAPGANEDLQGIPTFCGASGMLLDKMLNAINLDRTKVYISNT
VFWRPPGNRKPTDLELDMCRPFVEKHVALVSPQILILVGGIACYSLLDSTKTISNLRG
RFHTYTNQYLSNSITTAIFHPAYLLRQPAQKRLAWEDLKKIREYLDNTNNTNT"
/product="uracil-DNA
glycosylase"
/besthit="qcoverage 100 , hcoverage 100 , similarity 99.6
, identity 99.6 , evalue 4.55e-198 , alnlength 273 ,
Bacteria , Proteobacteria , WP_015588805.1 MULTISPECIES:
uracil-DNA glycosylase [unclassified Wolbachia]"
gene complement(16490..17029)
/locus_tag="wEsol_01077"
CDS complement(16490..17029)
/locus_tag="wEsol_01077"
/codon_start=1
/transl_table=11
/fullproduct="qcoverage 100 , hcoverage 100 , similarity
100 , identity 100 , evalue 1.83e-121 , alnlength 179 ,
Bacteria , Proteobacteria , WP_015588806.1 MULTISPECIES:
peptide deformylase [unclassified Wolbachia]"
/cog="Def COG0242 168 N-formylmethionyl-tRNA deformylase"
/pfam="Pep_deformylase"
/tigr="TIGR00079 pept_deformyl 161 peptide deformylase"
/product="peptide
deformylase"
/translation="MSILPIVIAPDERLITRASEVTDINDKIKELVNDMFETMYDAEG
LGLAAVQVGVLKRIFVMDIQLETIENEPAGYGSTGKFYMINPEITELSDEQVILKEGC
LSIPEQSHEIKRPKYLTVKYKDLNDEEQTLKASGWLARCIQHEDHLNGILYIRHLSK
LKYDMAMTKAQKIKKQYEQ"
/besthit="qcoverage 100 , hcoverage 100 , similarity 100
, identity 100 , evalue 1.83e-121 , alnlength 179 ,
Bacteria , Proteobacteria , WP_015588806.1 MULTISPECIES:
peptide deformylase [unclassified Wolbachia]"
gene 17168..18406
/locus_tag="wEsol_01078"
CDS 17168..18406
/locus_tag="wEsol_01078"
/codon_start=1
/transl_table=11
/fullproduct="qcoverage 100 , hcoverage 100 , similarity
100 , identity 100 , evalue 2.31e-293 , alnlength 412 ,
Bacteria , Proteobacteria , WP_015588807.1 MULTISPECIES:
cell division protein FtsA [unclassified Wolbachia]"
/cog="ftsA COG0849 418 Cell division ATPase FtsA"
/pfam="FtsA SHS2_FTSA EutA Competence_A MreB_Mbl
Pfam-B_178 Pfam-B_7979 FtsA Ppx-GppA_HSP70"
/tigr="TIGR01174 ftsA 371 cell division protein FtsA"
/product="cell division
protein FtsA"
/translation="MYSAVIAKPKRNVFAVL DIGTTKIICLIVKINGNFSYKVTGTGY
KIAEGVNGGSITNVKHANYSISSTIGLAEQVSEETIDQIYVNIAGCGISSFNVHNEII
AANHEISERDIRRLVFQTFEKYIEDNVIIHNIPLKYHLDDMTDIKEVGGLYGKRLSAD

```

VNVVTASRPALTNIENCITNNGGLNMAGCIASAYSAGLACLSSEDEKELGTAIVDIGGG  
 CTAIGIFKRGKLVYASSVPIGGVHITRDIAYGLCTSIERAHEYIKILYGSTIVTSIDEN  
 EYITVQNSENDEPTQVFKSELINIIRPRVEEILEMVREQFQEQKDPINKVVITGGTSQ  
 LTSMKEIAGYIFNKQVRIGSPESLSGLDGEYDKNPVFSAAGSIKLIVDTFYKNNSGM  
 LGQDGKMSKLYNWVSKVTV"  
 /besthit="qcoverage 100 , hcoverage 100 , similarity 100  
 , identity 100 , evalue 2.31e-293 , alnlength 412 ,  
 Bacteria , Proteobacteria , WP\_015588807.1 MULTISPECIES:  
 cell division protein FtsA [unclassified Wolbachia]"  
 gene 18448..18849  
 /locus\_tag="wEsol\_01079"  
 CDS 18448..18849  
 /locus\_tag="wEsol\_01079"  
 /codon\_start=1  
 /transl\_table=11  
 /fullproduct="qcoverage 100 , hcoverage 100 , similarity  
 100 , identity 100 , evalue 5.38e-85 , alnlength 133 ,  
 Bacteria , Proteobacteria , WP\_015588808.1 MULTISPECIES:  
 nucleoside triphosphate pyrophosphohydrolase  
 [unclassified Wolbachia]"  
 /cog="COG4997 COG4997 95 Uncharacterized conserved  
 protein"  
 /pfam="Pfam-B\_713 MazG-like"  
 /product="nucleoside  
 triphosphate pyrophosphohydrolase"  
 /translation="MNKKHCFKINKLVRDHTTEIIRSHGIIIVYERVMEKDEYIERLKD  
 KLLLEEAKVIAASKTPDENLEELADLLEVIHALGKESGLSIEQIEEKRISKKQERGGE  
 NRIYNTYIEVNSKSIDYYHKKPSDYPEIIVV"  
 /besthit="qcoverage 100 , hcoverage 100 , similarity 100  
 , identity 100 , evalue 5.38e-85 , alnlength 133 ,  
 Bacteria , Proteobacteria , WP\_015588808.1 MULTISPECIES:  
 nucleoside triphosphate pyrophosphohydrolase  
 [unclassified Wolbachia]"  
 gene 18990..19781  
 /locus\_tag="wEsol\_01080"  
 CDS 18990..19781  
 /locus\_tag="wEsol\_01080"  
 /codon\_start=1  
 /transl\_table=11  
 /fullproduct="qcoverage 100 , hcoverage 100 , similarity  
 99.6 , identity 99.6 , evalue 7.00e-197 , alnlength 263 ,  
 Bacteria , Proteobacteria , CDR78468.1 methionine  
 aminopeptidase,Methionine aminopeptidase,methionine  
 aminopeptidase,Xaa-Pro aminopeptidase,methionine  
 aminopeptidase, type I,Metallopeptidase family M24  
 [Wolbachia endosymbiont of Drosophila simulans wAu]"  
 /cog="Map COG0024 255 Methionine aminopeptidase"  
 /pfam="Peptidase\_M24"  
 /tigr="TIGR00500 met\_pdase\_I 247 methionine  
 aminopeptidase, type I"  
 /product="methionine aminopeptidase,Methionine  
 aminopeptidase,methionine aminopeptidase,Xaa-Pro  
 aminopeptidase,methionine aminopeptidase, type  
 I,Metallopeptidase family M24"  
 /translation="MENMNITIHSQEDFEFMRKAGRLAAETLDFIAPYVKVGVTTNEL  
 NDLCDFIINAGAIPAPLNYRGYPKSICTSKNAVCHGVPDDKPLKDGDI LNIDVTVI  
 LNGWHGDTSRMFVWGKPSIAKRLCDATYNALMEAIKQVKPGNKLNEIGLAIEKYIRD  
 FGYSIVRSYCGHGIGKVFHAPPNVVHFYDQDEDLVLKEGMFFTIEPMINAGKHETLLS  
 KLDDWTVTTRDLSLSAQFEHTLGVTKDGAEIFTLSPKNWHFPPYN"  
 /besthit="qcoverage 100 , hcoverage 100 , similarity 99.6

```

, identity 99.6 , evalue 7.00e-197 , alnlength 263 ,
Bacteria , Proteobacteria , CDR78468.1 methionine
aminopeptidase,Methionine aminopeptidase,methionine
aminopeptidase,Xaa-Pro aminopeptidase,methionine
aminopeptidase, type I,Metallopeptidase family M24
[Wolbachia endosymbiont of Drosophila simulans wAu]"
gene complement(19809..21056)
/locus_tag="wEsol_01081"
CDS complement(19809..21056)
/locus_tag="wEsol_01081"
/codon_start=1
/transl_table=11
/fullproduct="qcoverage 100 , hcoverage 100 , similarity
100 , identity 99.8 , evalue 6.31e-288 , alnlength 415 ,
Bacteria , Proteobacteria , WP_015588810.1 MULTISPECIES:
MFS transporter [unclassified Wolbachia]"
/pfam="Sugar_tr MFS_1 MFS_2 Sugar_tr"
/tigr="TIGR00883 2A0106 400 MFS transporter,
metabolite:H+ symporter (MHS) family protein"
/product="MFS transporter"
/translation="MQQITKVIFSSLICNTLLWYDHMLFGHLINIIGSVFFPSDDQLT
SVLKAFGVFAVGFLMRPVGAIFGHIGDKHGRRVALLLSIILMTLSTVLIAFVPGYQS
IGILASMLVVCLRLLQGIGSLGGEAGNAPFLIEHAPKNKKGFFGSIEVLSAIFGSVLSL
IAVLICKKVSDFESWGWRLPFIFSLAMGLISYIMRYILDESPEYKRQKNPSKLPKEL
LNSYKKPFLISVGVDIVENSSLYIYLVFFNVLTNKILTNTNTHFNHIVEILSQIALGGL
TVLFAILSDKVGREKVMKFAFIAFIIVSYPVFSMLCSSNYLLAHILFIPIAASLGPV
SALMCELFPTKVRYSGFGLSRNIAAGFFGGLAPFICTTIKVTGQETSASFYMIFCAL
IGLVAISQIKGELSSKSPKVNQV"
/besthit="qcoverage 100 , hcoverage 100 , similarity 100
, identity 99.8 , evalue 6.31e-288 , alnlength 415 ,
Bacteria , Proteobacteria , WP_015588810.1 MULTISPECIES:
MFS transporter [unclassified Wolbachia]"
gene 21277..22158
/locus_tag="wEsol_01082"
CDS 21277..22158
/locus_tag="wEsol_01082"
/codon_start=1
/transl_table=11
/fullproduct="qcoverage 100 , hcoverage 100 , similarity
100 , identity 100 , evalue 1.64e-201 , alnlength 293 ,
Bacteria , Proteobacteria , WP_015588811.1 MULTISPECIES:
16S rRNA (cytosine(1402)-N(4))-methyltransferase RsmH
[unclassified Wolbachia]"
/cog="COG0275 COG0275 314 Predicted
S-adenosylmethionine-dependent methyltransferase involved
in cell envelope biogenesis"
/pfam="Methyltransf_5 Methyltransf_31"
/tigr="TIGR00006 TIGR00006 310
S-adenosyl-methyltransferase MraW"
/product="16S rRNA
(cytosine(1402)-N(4))-methyltransferase RsmH"
/translation="MHTPVLLKEMLSLLSPQDDGIYVDATFGAGGYSKAILESADCK
VYAIDRDETVTKFYDDLSIRYPDRIKLFIEKFSNVKNLLDSNNIEGIDGIVFDIGVSS
MQLDNGDRGFSFLHDGPLDMSMDNSSYINASTFVNALREEEIIANTYNYGGERHSRKI
ARAIVNARKKKTIKTTFELADIVRSVVFGRGSKIDPATRTFQAIRIWVNDDELGELEKG
IKAASEILSENGKLIVVTFHSLEDRIKVTFFKDLCDCKTFSLNKKVIEASIEEVS
ANPRSRSAKLRAIQRLS"
/besthit="qcoverage 100 , hcoverage 100 , similarity 100
, identity 100 , evalue 1.64e-201 , alnlength 293 ,
Bacteria , Proteobacteria , WP_015588811.1 MULTISPECIES:

```

```

16S rRNA (cytosine(1402)-N(4))-methyltransferase RsmH
[unclassified Wolbachia]"
gene      22155..22466
          /locus_tag="wEsol_01083"
CDS       22155..22466
          /locus_tag="wEsol_01083"
          /codon_start=1
          /transl_table=11
          /pfam="Pfam-B_3323 Pfam-B_13298 DivIC"
          /fullproduct="qcoverage 100 , hcoverage 100 , similarity
100 , identity 100 , evalue 3.53e-60 , alnlength 103 ,
Bacteria , Proteobacteria , WP_010962410.1 MULTISPECIES:
hypothetical protein [Wolbachia]"
          /translation="MRTFCIISIVMFFLSIVGLFKVKLVQSLNRELIIKSEINLVQ
SDMKVLQAEWSYLNPNKRLASLVKKYLKNNSLILASQVKNLDSLNGRSVLAQLKIHDQ
Q"
          /product="hypothetical protein"
          /besthit="qcoverage 100 , hcoverage 100 , similarity 100
, identity 100 , evalue 3.53e-60 , alnlength 103 ,
Bacteria , Proteobacteria , WP_010962410.1 MULTISPECIES:
hypothetical protein [Wolbachia]"
gene      complement(23103..23402)
          /locus_tag="wEsol_01084"
CDS       complement(23103..23402)
          /locus_tag="wEsol_01084"
          /codon_start=1
          /transl_table=11
          /pfam="ETC_C1_NDUFA4"
          /fullproduct="qcoverage 100 , hcoverage 100 , similarity
100 , identity 100 , evalue 6.98e-65 , alnlength 99 ,
Bacteria , Proteobacteria , WP_015588813.1 MULTISPECIES:
ETC complex I subunit [unclassified Wolbachia]"
          /translation="MGIDDKVVFRIYKPTKTATQSGLGNTNFWHLKIESGSYYIEPLM
GWVGSKDPKKQIVLKFDSLEKAVFYAKKRNVKYIIEMPKNVKRLPKSYASNFIK"
          /product="ETC complex I
subunit"
          /besthit="qcoverage 100 , hcoverage 100 , similarity 100
, identity 100 , evalue 6.98e-65 , alnlength 99 ,
Bacteria , Proteobacteria , WP_015588813.1 MULTISPECIES:
ETC complex I subunit [unclassified Wolbachia]"
gene      23548..24159
          /locus_tag="wEsol_01085"
CDS       23548..24159
          /locus_tag="wEsol_01085"
          /codon_start=1
          /transl_table=11
          /fullproduct="qcoverage 100 , hcoverage 100 , similarity
100 , identity 100 , evalue 1.92e-137 , alnlength 203 ,
Bacteria , Proteobacteria , WP_010962412.1 MULTISPECIES:
50S ribosomal protein L25/general stress protein Ctc
[Wolbachia]"
          /pfam="Ribosomal_L25p"
          /tigr="TIGR00731 ctc_TL5 176 ribosomal protein L25,
Ctc-form"
          /product="50S ribosomal
protein L25/general stress protein Ctc"
          /translation="MTQQEIVTINAELRDITKTKAMHSLRKKGNIPGIIYGKGHDNVN
LTLSAKEFTKQYKSGSLSAHLIELNISGKKEYALVRDIQLHVVKDVTQHVDFQFVDKG
SEIKIDIPLSFVNESKAPGIKLGVLNVLCRSIAVKCSPDKIPQVIEVDLSGKMIGQS
IHINDVKLPEGVKFVAHEEENFTIVTISAADSDVEEPPQAETEE"

```

```

/blasthit="qcoverage 100 , hcoverage 100 , similarity 100
, identity 100 , evalue 1.92e-137 , alnlength 203 ,
Bacteria , Proteobacteria , WP_010962412.1 MULTISPECIES:
50S ribosomal protein L25/general stress protein Ctc
[Wolbachia]"
gene 24159..24707
/locus_tag="wEsol_01086"
CDS 24159..24707
/locus_tag="wEsol_01086"
/codon_start=1
/transl_table=11
/fullproduct="qcoverage 100 , hcoverage 100 , similarity
100 , identity 100 , evalue 3.84e-129 , alnlength 182 ,
Bacteria , Proteobacteria , WP_015588814.1 MULTISPECIES:
aminoacyl-tRNA hydrolase [unclassified Wolbachia]"
/cog="Pth COG0193 190 Peptidyl-tRNA hydrolase"
/pfam="Pept_tRNA_hydro"
/tigr="TIGR00447 pth 188 peptidyl-tRNA hydrolase"
/product="aminoacyl-tRNA
hydrolase"
/translation="MHLIVGLGNPGSQYELTHHNIGFIVVDTICKYWNFQSFSKKADY
LITSGIINDNKIMLIKPYSEFMNNSGIPVAKIRNFYKLSLDNIVVIHDDADLELGRIKI
KKGSSAGHNGLKSIDSFIGNDYWRLRFVGRPEDQQRSLADYVLSKFSNFDNVTSLVE
KIAKNIHMLMLQGDNTAFINLIV"
/blasthit="qcoverage 100 , hcoverage 100 , similarity 100
, identity 100 , evalue 3.84e-129 , alnlength 182 ,
Bacteria , Proteobacteria , WP_015588814.1 MULTISPECIES:
aminoacyl-tRNA hydrolase [unclassified Wolbachia]"
gene complement(24710..25672)
/locus_tag="wEsol_01087"
CDS complement(24710..25672)
/locus_tag="wEsol_01087"
/codon_start=1
/transl_table=11
/pfam="Pfam-B_10563 HTH_Tnp_1 HTH_29 rve DDE_Tnp_IS240
DDE_Tnp_IS1595 rve_3 rve_2"
/fullproduct="qcoverage 100 , hcoverage 100 , similarity
100 , identity 100 , evalue 2.34e-235 , alnlength 320 ,
Bacteria , Proteobacteria , WP_015588815.1 MULTISPECIES:
IS481-like element ISWpi4 family transposase
[unclassified Wolbachia]"
/translation="MGQILHGCAKTETETIRRAIQNSKESIAKLSRYYNLNPKTIIKWR
KRSFAKDADMGPKHARSTVLTLEEEAVIVAFRKHTLLPLDDCLYALQTSIPHLTRSSL
HRCLQRHSISRLPDVGGEVKPKKKFKQYPIGYFHIDIAEVRTEEGKLYLFVAIDRTSK
FTYVELYKSATKPIAAEFLRNLIKILPYKIHTILTDNSVQFTNQKRHKYAFQHIFDRA
CEENDIEHRLTKVSHPTNGQVERMNKTLKNATVKKYYYQSHQQLKEHLYDFVMAYNY
AKRLKTLKGLTPFEFISLQWTKSPELFILNPHHHTLGPYTPCVS"
/product="IS481-like element
ISWpi4 family transposase"
/blasthit="qcoverage 100 , hcoverage 100 , similarity 100
, identity 100 , evalue 2.34e-235 , alnlength 320 ,
Bacteria , Proteobacteria , WP_015588815.1 MULTISPECIES:
IS481-like element ISWpi4 family transposase
[unclassified Wolbachia]"
gene complement(26114..27262)
/locus_tag="wEsol_01088"
CDS complement(26114..27262)
/locus_tag="wEsol_01088"
/codon_start=1
/transl_table=11

```

```

/fullproduct="qcoverage 100 , hcoverage 100 , similarity
100 , identity 100 , evaluate 4.14e-274 , alnlength 382 ,
Bacteria , Proteobacteria , WP_174517007.1
2-octaprenyl-6-methoxyphenyl hydroxylase [Wolbachia
endosymbiont of Cardiocondyla obscurior]"
/cog="UbiH COG0654 387 2-polyprenyl-6-methoxyphenol
hydroxylase and related FAD-dependent oxidoreductases"
/pfam="Pfam-B_1669 FAD_binding_3 DAO FAD_binding_3"
/tigr="TIGR01984 UbiH 382 2-polyprenyl-6-methoxyphenol
4-hydroxylase"
/product="2-octaprenyl-6-methoxyphenyl
hydroxylase"
/translation="MNYDVIIISGGGLLGLITAIGLSCNSVSVAVIEKNSLPRVDDNR
AFAISQGSKKILEKLGIWQFIESEAEPILDICILDAVTVHYNHKMVGEPPMGYVINNA
AIWNAIINNFLNKLNIYSPHSYKTIAYDSGYVEVILDNNQELISSLLICAEGKHSKLP
ELFSIPTVKFDYKQSSIVFNVKHELHHQNLAVRFFPGGPFMAILPMKGGYTSSIVWTE
KSEISKMLMDLSEEEFIIELKKRFGSYLGEIKLEGERKLYPLSFAPAKKLYKGRVLLI
GDAAHSIHPVAGQGLNLGIRDVESIIKHVVAASGIDVGSSYLLKKISRNRIFYDNFT
MALATDGLNRMFSNRIFCAKALRNGLIAVENSNFLKKRFIRHAMGFI"
/besthit="qcoverage 100 , hcoverage 100 , similarity 100
, identity 100 , evaluate 4.14e-274 , alnlength 382 ,
Bacteria , Proteobacteria , WP_174517007.1
2-octaprenyl-6-methoxyphenyl hydroxylase [Wolbachia
endosymbiont of Cardiocondyla obscurior]"

```

gene

tRNA

```

4591..4667
/locus_tag="wEsol_tRNA-19"
4591..4667
/locus_tag="wEsol_tRNA-19"
/gene="tRNA-Arg"
/intronpos="0..0"
/program="tRNAscan-SE"
/cove_score="68.6"
/evidence=predicted
/type="Arg"
/anticodon=CCT
/product="tRNA-Arg (CCT)"

```

ORIGIN

```

1  tactatagct gttatacgcc aaaagtaagt attagatata acaaatagag gaaattagat
61  agaatgatta aaggggcaag gatataaagg tttaacttaa aataacctga taaaatttga
121 atcacacttc caagtgccgg caccatgaa agtaatgtaa ctgcacaaat cagtagattt
181 ttacgattt ttggtgtttt atgctcgttc tctagtttgc ggtatgattt tcgtatagag
241 attgttattc tacctaaata ccagttaact attccaccaa ggcttgatcc tagtactcca
301 aaaaataaca taagtagtgg agtgtaatac gacctgaaat aaagcatggg attgaacaca
361 aaaccttgat gtatgggtaa aactaacgac gatactagac tatctgtgaa taacaggaag
421 tagttttcca tatgagttta ccaggttggt gtaccatctt cattgtcaga aattgtaatc
481 cccatttggt tcaactggtc ccttattttg tctgcagtat tataatcttt attttgtttt
541 gctgctcttc ttaaacttat caatctttct atttcttgat gactcacacc agcagtaaac
601 cactcttgat aacttgactc aagaagacca ataaatctgg cgctcttaac aaaactctca
661 gttaatttaa gcttttcaact ttcattactc attttggttaa tttttgcagc catttcatgt
721 aatatagcta gagcttcagg aatgtttaag tcgtttttta aagcgtctat aaaatcttta
781 gaaatctctg cgttactttc atcaataact attgtatcta aaccacgtaa taaccgataa
841 aatttattta aggtttcctg tgcatacaga ataacgtttt ctgtccaatc aagtggtttt
901 ctgtagtgag ttttgagcag tgcatacgct attacttcac cttttattcc actatctagc
961 aaatctctta ctttgactat attaaataag gacttgctca ttttctcttc atttactgta
1021 agaaagccgt tatgtatcca gtattttgca aacattgatc cagcaaattg agacttactc
1081 tgtgcaattt cattttcatg gtgaggaaat tgtaaattcta tgccgccacc atgaatatca
1141 aaatctttgc caaggtaagc atatgacatt gctgagcatt ctatatgcc aaggtgctg
1201 ccctctcccc atgggctatt ccaataactt gaaagtttgt agtcaatatc atttgcaggc
1261 ttccacagca caaaatctcc aggggtgctt ttattttcat tcacttcaac tctgctacct
1321 ggaaccaatt catcagtttt ttttcttgat aaagcaccat attcatggta agattctata

```

|      |             |             |             |             |             |             |
|------|-------------|-------------|-------------|-------------|-------------|-------------|
| 1381 | ttaaaataca  | cgtgtttgtc  | agattcataa  | gcgtggcctg  | attgcagcaa  | atgttcaatt  |
| 1441 | aattttataa  | tgtaatctac  | gttttcggtt  | gcttttggtt  | cgtatgttgg  | ttttttacaa  |
| 1501 | tttatgcttt  | ccatatcatc  | atgaaaagct  | ttaatgtaat  | atgtggttat  | acttttctatg |
| 1561 | ttgctatttt  | tttactttgc  | tgcattaatt  | atcttatcat  | caatgtcggg  | tatgttacgc  |
| 1621 | acataggtaa  | ctttgccata  | acaaaactta  | agtagctgaa  | ataacacatc  | atacacaaca  |
| 1681 | acagaccgtg  | cattgcctat  | atgtgctgtg  | tcatatactg  | ttgggtccgca | aacatacatt  |
| 1741 | ttcacatgat  | ctttatcgat  | aggtgtaaaa  | agctcctttt  | tttttggttaa | gggtgttgtaa |
| 1801 | agcctaacca  | tatacgaagc  | ttttgagaaa  | agaaaatgcc  | ccaatgataa  | gttgtggccc  |
| 1861 | tttgactact  | acaacaagag  | taagcaataa  | cccacacaat  | gatattagaa  | ctcccaatat  |
| 1921 | ggatagaaac  | ccatctttac  | tcatgatacc  | aagcgaaata  | agagtcgtac  | caattgcagg  |
| 1981 | aatgaagtta  | gtaagaggta  | gtggaagagc  | tattgataac  | gcacaaagca  | gcattataaa  |
| 2041 | agctaaaatt  | ttttcaccgg  | gcccatagaa  | aataaaaagac | attcttggtc  | tcatgaactt  |
| 2101 | ttctattttt  | tttaatgctg  | gagaagtttt  | ctctaccaca  | agagctagtg  | ttgaacgctg  |
| 2161 | aaaagacctt  | ctttccaacc  | aatgcggcat  | ccaaggagaa  | tcaaattcaa  | atagaagctg  |
| 2221 | cagtgagaat  | aagattaaag  | gtatagaaag  | aatagttgta  | taaccagggtg | gaaccggtat  |
| 2281 | aggcaccgat  | agcggcaagg  | agaagatgat  | tattaaata   | ccaaaaccac  | gctcatgcaa  |
| 2341 | agctgtttta  | atgtcaaaca  | aagttacttt  | atcgctatca  | ttgttatttg  | tatctgcaac  |
| 2401 | ttctttttaga | atatcagaag  | ctaatttatc  | acttttagtc  | aacttatcat  | tttttgacac  |
| 2461 | gaaaaacctt  | tgataaaaat  | aattcttaac  | acaattattg  | ttttatttca  | atatgcatta  |
| 2521 | ttcatttttg  | gctagtaatt  | cgttcttttg  | ttaaagtgtt  | gtaaagcttt  | taagaagaga  |
| 2581 | aagtgtctccg | gttataagtt  | gtggctcttt  | gactattaca  | acaagagtaa  | gcaacaacgc  |
| 2641 | gcacaacgat  | actaaaactc  | ccaatatgga  | tagaaacccg  | tctttactca  | taatgctaag  |
| 2701 | tgaaataaga  | gttgtgccaa  | ttgcaggaag  | gaagtgaagta | aaaggtaatg  | gaagagctat  |
| 2761 | tattattgca  | caaagcaaca  | tcataaaagc  | cagaatcttc  | tcaccaggcc  | catagaaaat  |
| 2821 | gaaagacagt  | cttggtctca  | tgaatttttc  | tattttttct  | aatacagggg  | aagttttctc  |
| 2881 | taccacaaga  | gctagtgttg  | aacgctgaaa  | agatcttctt  | tctagccaac  | tgggcatcca  |
| 2941 | aggagaatca  | aatccaaata  | gaagctgcag  | tgagaataag  | attaaaggta  | tagaaagaat  |
| 3001 | agttgtataa  | ccagggtgaa  | ccggtatagg  | caccgatagc  | ggcaaggaga  | agatgattat  |
| 3061 | taaaatacca  | aaaccgcgct  | catgcaaagc  | tgtttttaatg | tcaaacaaag  | ttactttatt  |
| 3121 | gctatcgttg  | ttattggtat  | ctgcaacctc  | ttttagaata  | tcagaagcta  | gttttttatc  |
| 3181 | tttagttagt  | ttctcacttt  | tttgcacaa   | tatcttttaa  | taaaatattc  | ctcctaagct  |
| 3241 | aacatagttg  | ttgtctgtatt | tcaatatattg | ttattttattt | cataccaata  | cttcatctct  |
| 3301 | ttcattcttt  | aacctgacta  | agttttttaa  | cagatgacat  | gcactaagggt | gcatgtcacg  |
| 3361 | aagtatgagg  | acgctaacga  | tctggttcgt  | tagacgataa  | tttttctgag  | tccttaagct  |
| 3421 | cctgttttaag | gttttttgatg | ccttttcccta | aatcacccat  | aacttgcggt  | aatctgcctg  |
| 3481 | caccaaacag  | aactaaaatt  | attattaaga  | ctagaaaacaa | ttgccatggt  | cctaaactca  |
| 3541 | ttttcacctc  | cattttaaatt | attgaccttt  | aaatatataa  | acttgactga  | agtcaagtaa  |
| 3601 | cacatagatt  | atatcacctt  | tattttaatta | taaatcaagg  | ttttttaatt  | attttataac  |
| 3661 | aattccagac  | tagattattt  | tcttgacagc  | aataagtgga  | aacttttctgc | ttaactgtag  |
| 3721 | agtagaagag  | agctcactaa  | aaaactttgc  | tagcgtatca  | tcttgaggcc  | tatggtatat  |
| 3781 | atcgctagaa  | actcctgatt  | gaataatttt  | accatttttc  | attacgtaga  | taaaatctgc  |
| 3841 | aactttcaat  | gcttcttgcg  | ggtcatgagt  | taccattagc  | acagggatat  | ttttacttct  |
| 3901 | aaaaagggac  | aatatatgtt  | gtcttattcg  | gcacttgagc  | agtatatcta  | aattagaaaa  |
| 3961 | tggttcatct  | aacaacacaa  | catcagggtt  | ttgtgccatc  | actcttgcta  | ttgcaactaa  |
| 4021 | ttgttgctgt  | cctccagata  | aggcgttagg  | gtacatatatt | tcgtattttt  | ctatatgtag  |
| 4081 | taacttcaaa  | atttccaatg  | caattagggtg | cttttctctc  | ttggaagagc  | tgcggatagc  |
| 4141 | aaaggttata  | ttttctacta  | ctgttttgtg  | aggaaataat  | gcagaatgct  | gaaaaatcaa  |
| 4201 | tccgatattt  | ctatgctcta  | tagcgactga  | tgccctatta  | cttgcaacta  | acctatcatt  |
| 4261 | tataaaaaata | gttccagatt  | ttggattttc  | tatccccgca  | attaatttca  | aaattgttga  |
| 4321 | cttgccacag  | ccagaatgcc  | ccaataaaca  | tgcaacattt  | cctttcttta  | ctttaatgtt  |
| 4381 | tatattgctt  | aaagcaaaagt | cgttttgatt  | gttatagaaa  | taaccaatat  | tggttaactag |
| 4441 | cattaatctt  | acttaaacca  | tgttattaaa  | tataatagca  | ttataactcaa | gaagtacaga  |
| 4501 | aatgtttttt  | gtcgtcataa  | attggttatg  | caagaaatct  | agaaaagaaa  | ggattttttg  |
| 4561 | ctataacttt  | acatgaatgg  | taggaaacac  | gggactatag  | ctcagcagga  | tagagcggtg  |
| 4621 | gactccta    | ctgaaggctg  | tgcgttcgaa  | tcgcactagt  | cccaccacat  | taaatttcat  |
| 4681 | ggagattttt  | tttcacaaat  | acgcacacct  | ttttttgcgg  | ttttaagata  | taaattccct  |
| 4741 | aataataaaa  | cgggtttttgt | gtcattccag  | tactcctctc  | ttataattta  | cgtgtttaag  |
| 4801 | aatgacttct  | gctaaacctt  | tactaattcc  | aggtacgttt  | tgaatttcag  | ccagagaagc  |
| 4861 | tttgcttata  | tttttctactg | aaccaaata   | agacatcaac  | gctttttttc  | ttttgttgcc  |
| 4921 | aatgccgggt  | attttgctta  | attgtgaaac  | tataaactgt  | ttatcgcggt  | tttttctatg  |

|      |             |             |              |             |             |             |
|------|-------------|-------------|--------------|-------------|-------------|-------------|
| 4981 | tgaagttatc  | gcaaaacggt  | gggcttcac    | acgcagcgat  | tgtaagtaaa  | gcatgacttt  |
| 5041 | gctgtcattt  | gccagactga  | attcttcct    | gcccagcata  | taaaatcttt  | catttcctgc  |
| 5101 | gttacgatca  | ggaccttttg  | ccatacaagc   | aaaaggaacg  | tttatattca  | atacttccag  |
| 5161 | tacattctgt  | actatggaaa  | catgtcctgg   | tccaccatca  | atcagtaaaa  | aatcaggtat  |
| 5221 | tatgcctttt  | atattgccgg  | agaaacgtct   | ggttagcact  | tccctcatca  | ttttatagtc  |
| 5281 | atcgccctgaa | aatttttcct  | ttatagtaaa   | ttttctgtac  | tcacttttta  | aaaaaccctc  |
| 5341 | ctgccctgca  | acaaccatta  | caccaatttg   | ttggtttcca  | aataataggc  | tattgtcata  |
| 5401 | aacctcaata  | cgctttggaa  | tatttggtta   | caagaagatt  | ttgctaagct  | cctcaagctt  |
| 5461 | ttctagggtta | tttctataat  | cgataagctt   | ctgctctaag  | ctatgctgag  | agttatcata  |
| 5521 | aacaaatttc  | aataaatcac  | gctctttttt   | attctttgca  | tgcagaactt  | ttactggctt  |
| 5581 | ttgagcaacc  | ttatatagtg  | cttgttctat   | aatttcctta  | tccacaatag  | aatctggaac  |
| 5641 | gtaaattttgt | attggaggta  | tgtagctga    | attataaaaa  | ttgacaaaaa  | aggtggataa  |
| 5701 | aatttcatca  | tttgagtgat  | caccacagtt   | ctcggcaaag  | taaggagtgc  | tgccgtagtt  |
| 5761 | gtctttattt  | ctgaacgata  | acacactaat   | acatgctaga  | tcctcttcac  | gtacaatact  |
| 5821 | gaagaaatct  | gcatcttttt  | caaaagaaaa   | atccgtgtgc  | tgtatttgaa  | tttgctcaag  |
| 5881 | aaactttacc  | cgatctctat  | atatagcagc   | aagctcatag  | ttttcttcac  | tgctgcactt  |
| 5941 | tctcattgtg  | aaaagtaact  | gttctttcac   | ttccttattt  | cttccaagca  | atgtatttcg  |
| 6001 | tgccctgtttt | actgattggc  | agtagtcgtc   | ttttgtgatt  | ttgtttatgc  | atggtgctga  |
| 6061 | gcagcgctta  | atttgatatt  | caatacatgg   | tctttttgtt  | gaggaaaagt  | attgatctga  |
| 6121 | acatactctt  | aggagaaaaag | ctttttgcaa   | tgacaatata  | gtttgcttaa  | cagcagcggc  |
| 6181 | agatgtaaag  | ggaccataat  | aatgaaactc   | atttttctta  | aatttgcctc  | tatatattgc  |
| 6241 | tattcttgga  | taatcgtgct  | tggaaattgt   | tatataagga  | taaaattttc  | catccttgag  |
| 6301 | cacaatatta  | taaagtgggt  | tcaatgattt   | tattagctgt  | gcttcaagaa  | gcagtgcctc  |
| 6361 | gatttcattc  | tcagtgatga  | atatttcaac   | cttaataacc  | tgtaagagca  | taactctaata |
| 6421 | tcgttcagaa  | aggttttcga  | attgaaggta   | gtcggataat  | ctcgacttta  | agttttttgc  |
| 6481 | ttttccaaca  | tataaaactt  | tattcttatc   | tccaaccatc  | ttatacacgc  | cacaggactg  |
| 6541 | tggagatgat  | ttgatttggt  | ctttatatattg | cctgagcatt  | tatccattgc  | ttaacctgta  |
| 6601 | tgagggttaaa | atctgctact  | aatgaaaga    | tggaaactac  | attttcaagc  | aaagataatc  |
| 6661 | tgtttctcct  | cagtttatca  | gaatcacagt   | taatctttac  | actgtccata  | aactgattga  |
| 6721 | taaacggagc  | aaaaccagca  | agttcatcaa   | gtgctacatt  | aaagtgggtta | ttttttatcg  |
| 6781 | cttgttttat  | gtttttacaa  | gcagttatag   | cacaatttga  | tagcgcaatt  | tcttcacttt  |
| 6841 | caatcaaaaa  | cctcttaccg  | taagatgcac   | tataagtagt  | gccatcactt  | tttcttactt  |
| 6901 | tgctcatcat  | gttactgact  | cttttgtaag   | tgcttagaat  | ctgttcacct  | tctggcgtac  |
| 6961 | taagataacg  | atccaatata  | acagtttgct   | tttctgctgt  | cagcagatca  | ttaatatcga  |
| 7021 | ttttatatag  | tattgaatct  | acgacatctt   | gtcttatatc  | tctatttttt  | aaaataacct  |
| 7081 | tgaatctttc  | taagcagaat  | ttaaatacta   | attctgaaat  | ttgttttcta  | tttggcttat  |
| 7141 | cagctgacgt  | tgtattttta  | ttaaatagaa   | gttttgaaata | taaagataact | gacttgtcta  |
| 7201 | tcaatagcct  | aattggaaca  | tgcaaattat   | tttcaagtat  | tgtcctaatt  | ataccaattg  |
| 7261 | tcattctccg  | caaactaaat  | tgatcatacg   | aaccagagat  | tttttcacct  | gctgcaatta  |
| 7321 | aaccaactaa  | gctatccact  | ttgtctgcaa   | ttgacacagc  | aattgctgaa  | ggggatttag  |
| 7381 | ggcattcttg  | ctccgatctg  | attggcttat   | agtgttcagt  | tatagcttcc  | actatttctt  |
| 7441 | tatcttcttg  | aaaataagaa  | gcataatata   | cacccattac  | tccttgtaat  | tctggaaact  |
| 7501 | ctcttactat  | cgatgttgcc  | aatcagctt    | ttgccaaaata | tgcagcgcgt  | tcaactttta  |
| 7561 | tcagcgaagc  | atgtggaata  | aataatagcta  | tatactttga  | cagagccgta  | atacgcttta  |
| 7621 | ccttttctcc  | aacgctgcca  | agagaagcat   | gaaataaatat | cgaacctaat  | tttttgacat  |
| 7681 | aataatctag  | attttccttt  | ttatcttgag   | atattaaaaa  | ttgggcatca  | gcaagacgtg  |
| 7741 | cttctaatat  | tctttcgtgc  | cctttaacaa   | cttcaccatt  | gttgacgttg  | acaacagtga  |
| 7801 | caaagtgtga  | aattctcttt  | ccattactta   | aagcaaggta  | tttttgttgt  | gtattaacta  |
| 7861 | tactaagtat  | tacttccttc  | ggtaatccaa   | atgacttttc  | ttgatttact  | tcaccaacaa  |
| 7921 | gcacgattgg  | ccactctata  | agccctgtca   | attcatttag  | taaataatca  | tttttctcaa  |
| 7981 | gttgtaaatt  | ctgctctttt  | gtgaatttat   | taatctgata  | tagtataaat  | tgctttcttt  |
| 8041 | tgtccatttg  | gagaattaca  | ctgttttttt   | ctagcaattc  | aaaatagtct  | ttaggtgctt  |
| 8101 | taacagttaa  | cgctgtacca  | cttgagagaa   | atcgatggcc  | atatgttggtg | ttagatgctg  |
| 8161 | tgatccctgc  | aaaagacaca  | ggtattattt   | cgtcatttaa  | aatgcataaa  | atgtttttta  |
| 8221 | ttggcctaac  | ccacctttct  | tttcctttgc   | cccatctcat  | actttttggc  | caagagaaat  |
| 8281 | tttttaatat  | ttctcctagt  | tgatttttaa   | gaaactcttg  | aatgtttaa   | gagcagcttt  |
| 8341 | ctctttta    | gaagtaaaaa  | tcctcattat   | ttacttttcg  | aacgagcaaa  | tcttcttcat  |
| 8401 | ttttctgata  | ttttcttaaa  | aaaccttcga   | tagcactttt  | tggtgcgtta  | atgtttggtc  |
| 8461 | ccttaacttc  | gttattggaa  | tccttttagct  | ccaaagcatt  | tatgttgctg  | acaaataggg  |
| 8521 | taatgcgacg  | tgctgttaca  | aaaacctcca   | ttgatgtaaa  | ttttacatta  | tttttgtaa   |

|       |             |             |             |             |             |             |
|-------|-------------|-------------|-------------|-------------|-------------|-------------|
| 8581  | aaacattggc  | aatacagctc  | ttaacttgag  | ttacagctac  | attctgcatt  | ctcgggtggta |
| 8641  | tttcttctga  | aaggcactca  | aataacaact  | gcaacgacat  | acgctatttta | ctcatgtaca  |
| 8701  | attcacaaca  | tttttttgtc  | agctctctaa  | ctctaccaat  | ataagctgta  | cgttcattca  |
| 8761  | caccaagcac  | acctcttgca  | tcaagcagat  | taagtaggtg  | actagtttta  | atacattggg  |
| 8821  | cataagctgc  | cattggtagc  | tccttttcaa  | taagggaactt | gcacaattttt | tccgtatcct  |
| 8881  | cgaattgctg  | ctgtaccact  | ttagtatcat  | aataatctaa  | tgctagataa  | gaaaattcat  |
| 8941  | attctctttg  | tttaaaaata  | tttccgtaag  | ttacaccgtt  | atcgttccaa  | attatatcgt  |
| 9001  | aaacattatc  | tacaccttgt  | atgcacattg  | ctaaacgttc  | caacccatat  | gccacctcac  |
| 9061  | caggaatcat  | cttgcaagtca | atccctccaa  | cttgctgtat  | ataagtaagc  | tgtgttactt  |
| 9121  | ccattccatt  | gcatgtaact  | tcccatccaa  | gtcctgatgc  | accaacactt  | gggttttccc  |
| 9181  | aatcatcttc  | aacaaactta  | atatcatatt  | tttctgtaga  | tatgccaaga  | acttttaagc  |
| 9241  | tatctaaata  | gacgtcttgt  | aaattattac  | cagatggctt  | tattataact  | tgatattggg  |
| 9301  | aatgttgata  | caaacgatta  | ggattatcac  | tatagcgccc  | atctgctggc  | ctaattactg  |
| 9361  | gttgtagata  | tgcaattttt  | gccggttttg  | tatcaattgc  | agacataatt  | gttgcaggat  |
| 9421  | gtaatgtgcc  | agcaccaact  | tcagatgtgt  | atgagtgaag  | tataacacat  | ccttcactag  |
| 9481  | cccaaaaatc  | ttgtaactct  | tttattatac  | tttgtaagtt  | cacacaaaatt | tcacactttt  |
| 9541  | tatactaaat  | atataaataa  | ataagtacta  | ttcaatacct  | atTTTTTTTaa | cagtatcatg  |
| 9601  | taaaataatc  | acctaaaact  | gctgaacttt  | ccctcacata  | ctgaattatg  | cttttattta  |
| 9661  | ggacaattgc  | atcatgcata  | gttaaatecgc | agaatataaa  | tgctgttaaa  | tacagtaaaa  |
| 9721  | tcaccgcata  | aaatgtgtga  | aaaatcccct  | caaagtgaat  | tgacattgca  | ttattatagc  |
| 9781  | tgagctgtat  | tgaacttatt  | ggccatgggt  | ttatcacttc  | tacgacatta  | aaaaatacgt  |
| 9841  | aaggtatcat  | aagaaaaaag  | aaaaagtgc   | taaaatcatt  | aaacccaaaat | gggcattgaa  |
| 9901  | acatctgctt  | acatatattc  | ccatagagtt  | tacttacagc  | ataataaatc  | gacatcattg  |
| 9961  | ccggcattga  | aagtgtctaca | gtcagtactt  | gccctgacgc  | tatttgtatt  | actatttctt  |
| 10021 | caccactggt  | tgctgaaggg  | tcttgagcat  | gaaaaataaa  | tattccaatt  | aattgcatta  |
| 10081 | ctaacataac  | tattgccaat  | tttgtaaaaa  | cagcagctac  | gactattcct  | gagtctggca  |
| 10141 | ttttatatag  | taagtattcg  | cctccatatg  | taagaattaa  | tataacatcg  | acaataaata  |
| 10201 | atatttaaaaa | agaagaccaa  | tagttctgcc  | aacttggtaa  | atatacctatt | cctaaaagag  |
| 10261 | agcttactgt  | tttagcagga  | aaaaccttgc  | ctagcatcct  | ccccaaaaat  | ttaaaaaaaa  |
| 10321 | tccccatggt  | ctaagtaaca  | cttggtttat  | attattttata | atactgtatt  | gtaatagact  |
| 10381 | tatcaatagc  | ttaaaacatg  | tattggaaga  | ttttaggtaa  | tatgcagcaa  | cagtagaaga  |
| 10441 | acgtgcgcca  | aaaattttaat | aatttttatag | ggcttatgca  | cttaaaatttt | ttgcaatatc  |
| 10501 | aagtgcagcg  | taagtgaata  | ttgcacttgc  | acccgcacgt  | ttgaaaccaa  | tcaaagattc  |
| 10561 | ataaatcacc  | ttgtcataat  | ctagccagcc  | attatttgca  | gcagcttttta | tcattgcgta  |
| 10621 | ctcaccgctt  | acttggtgaag | caaaaatcgg  | aaaattaaac  | ttatcacttg  | ctgttttgat  |
| 10681 | aatatccaaa  | tatggcatac  | ctggttttaat | cataataaaaa | tctgcacctt  | catttatatc  |
| 10741 | catttcaatt  | tcgcacattg  | cttcgcgcgc  | atTTTTTataa | tccatttgat  | aaccactttt  |
| 10801 | gtctatagaa  | tgtgatagcc  | cacatgaacc  | aacgacttgc  | ctgaatggag  | catagaagct  |
| 10861 | agagcagtat  | tttactgcat  | aagataatat  | taatacgtct  | tgaaaattgt  | tatcatctaa  |
| 10921 | tgattttctg  | attcttccta  | ttctaccatc  | catcatatca  | gaaggagcaa  | ctacatcaca  |
| 10981 | tcctgatgct  | gctaaagcaa  | gtgcttgctt  | acataaatatc | gacacggttt  | catcgttttc  |
| 11041 | tacatccatc  | tgattatctt  | ttaaaatgcc  | gtcatggccg  | tgaatagtgt  | atgaatccaa  |
| 11101 | tgcaatgtct  | gcaataatac  | caatttcagg  | tacctttaat  | tttacagcac  | aaattgctct  |
| 11161 | gcagattaag  | ttgtcagaat  | tatatgcttc  | ctcagcgttt  | tcagatttta  | gtttactatc  |
| 11221 | aactacagga  | aaaattgcaa  | cagcattaat  | tcctaaatct  | ttagcttcct  | taactataga  |
| 11281 | cactaatcca  | tctattgaat  | aacactttac  | atctggtaag  | ccagaaattg  | gttcagttgt  |
| 11341 | ttcttctctg  | tcatagaaca  | acagaggaag  | aaccagatcg  | tttactgata  | aactattttc  |
| 11401 | acttgttaaa  | ttgcgaaccc  | atttgctcga  | gcgcctgcgt  | cttaatcttg  | tatttgggaa  |
| 11461 | attaaacatt  | ggatccaggc  | aaattcccag  | taaagagcaa  | cacccctgaa  | atgagtatta  |
| 11521 | cccaaagcac  | cgatattggg  | agaaataactt | tccaaccaag  | gcgcattagc  | tgatcatatc  |
| 11581 | gataacgagg  | tattgttgct  | ctaataccaaa | taaatacgaa  | taaaagtata  | attatcttca  |
| 11641 | aaacgaacca  | aattaaacct  | ggaattttat  | aaagcaaacc  | aagttctaac  | ggaggatacc  |
| 11701 | atcctcctag  | aaagaatatc  | gtcatcatag  | cacttgctag  | aatcatattt  | gcatattctc  |
| 11761 | caagaaaaaa  | gagggcaaaa  | ggcatggatg  | aatattcaac  | gttatatcca  | gagactagct  |
| 11821 | ctgcttcagc  | ttctggtaaa  | tcaaattgggt | gacgattagt  | ttctgcaagc  | aaagaaataa  |
| 11881 | aaaatattat  | tcctataggc  | attagtagta  | aatcaaccca  | aaatggcata  | ttgtgtttcg  |
| 11941 | ctaccaccat  | ctctccaaga  | tttaatgttc  | cagtggtaat  | aacgactgca  | gcaactatta  |
| 12001 | agcctattga  | aacttcatat  | gaaatcatct  | gagcagccga  | ccgtatagca  | ccaagaaatg  |
| 12061 | cataattaga  | attgcttgac  | cagcctgcaa  | taattacgcc  | gtatactccc  | agcgacgata  |
| 12121 | tagctagcac  | gtaaagcact  | ccaacattaa  | tatttgctat  | aaccttagga  | ataactactt  |

|       |             |             |             |             |             |             |
|-------|-------------|-------------|-------------|-------------|-------------|-------------|
| 12181 | gctggccatt  | ttctacaatt  | acttcagcac  | caaacggtat  | aactgcccag  | gcaattaatg  |
| 12241 | ccaagataaa  | ggtaagcatt  | ggagccataa  | tgaacagtat  | ggtgctcgct  | ctaaatggta  |
| 12301 | ttatcggctc  | tttaatcagt  | agcttaatag  | catctgcaaa  | tggctgcaat  | agcccaaaag  |
| 12361 | gtccaactac  | actcgggccg  | tgcctcagtt  | gaattgcagc  | aaggacctta  | cgctcaaagt  |
| 12421 | atgtcaaata  | tgcaactgaa  | agtagtagcg  | gtactaaaat  | aaataaaaata | ttaactagcg  |
| 12481 | tgttcataaa  | aagcttttagt | acaatctgcc  | attatTTTTTg | aagcgcgact  | tattgaatcc  |
| 12541 | gtcatataaa  | aattacactc  | ctttaaagta  | aaagggtgat  | tacttaaatt  | tattttacca  |
| 12601 | ttgctgattg  | gtacccatgt  | gttttttattc | acttgatcag  | catttctaaa  | ctgtggaccg  |
| 12661 | atagtattcta | atTTTTTTtct | cacgtcaaatt | aaactatcat  | atggtaagga  | gagatccaaa  |
| 12721 | tattgcgaga  | gattttttaat | aattaaccag  | tcctcctttg  | cttcacctgg  | aggaaataca  |
| 12781 | gctaaatttg  | ttctttgcac  | tcgaccttca  | gtgtttacat  | aagttgcata  | tttttctgta  |
| 12841 | tatgcagcac  | caggcaagat  | aacatctgcc  | acatgtgcac  | ccttatcacc  | gtgatgacct  |
| 12901 | tgataaatta  | caaagtgttt  | ttctaacttt  | gatgtgtcaa  | tttcatctgc  | accaagaaga  |
| 12961 | taaacaactt  | ctatttcacc  | actttctgca  | tgttccaata  | tttgattaat  | atccctttcg  |
| 13021 | ccttttttag  | gaacaaaccc  | aatatctagc  | ccaccaactc  | ttgctgcagc  | tttatgcagc  |
| 13081 | atattaaagc  | cattccagtc  | atctctgacc  | atgttaaatt  | tttctgcaat  | tttgccagct  |
| 13141 | agaactagaa  | ctgattcaga  | atcgtctctt  | actaatgcat  | cttgaccgat  | aatcagcata  |
| 13201 | gggctctgag  | cagcactcag  | cagcttacag  | aacttatgat  | ttccatttgc  | tatttcactc  |
| 13261 | aaaatatcag  | gattatcgcc  | caatttctca  | acatgataca  | aatattcaat  | gttaggacca  |
| 13321 | acacttgcaa  | caggaaagtt  | gccctgtaaa  | tatctctttc  | tcaatcttac  | gttaatgatc  |
| 13381 | ggtgcttcta  | tccttggggt  | tgtatttata  | agcagacaca  | aatccgcatt  | ctctatacct  |
| 13441 | tcaatagtgg  | tattgaacac  | atacgatcca  | cgattatttg  | gtataagttt  | tgcaccatcc  |
| 13501 | tgcttgcatt  | ctatatTTTcc | cgagccgagc  | ttctgcatca  | tttctttaag  | tagaagcata  |
| 13561 | gactcacaat  | ctgctaaatc  | acctgcaatt  | gcagctatTTt | tatttgattt  | tgtattcttt  |
| 13621 | aatttctttg  | cagcaacagt  | taatgcctca  | ttccaatcaa  | ctgggggctaa | tttaccatct  |
| 13681 | ttttttatat  | aaggctcgatc | aagacgctga  | acttttagtc  | catcataggc  | aaagcggggt  |
| 13741 | ttatctgata  | tccattcttc  | atttacctct  | tcgctcagcc  | ttggtaatat  | cctcataacc  |
| 13801 | tccggggccac | gataatcaac  | tctaattgcg  | ctaccacag   | catctagcac  | atctatagtc  |
| 13861 | tcacaatgtg  | atagctccca  | tggacgcgct  | gtaaaggagt  | aaggctttga  | agttaaagct  |
| 13921 | cctaccgggc  | agagatctat  | gatatttcca  | gataattcag  | aactaatatg  | cctttttatg  |
| 13981 | taagtgctaa  | tctctacatt  | ttctccctt   | ccgattcctc  | caagttcatt  | tgtacctgca  |
| 14041 | acatcagaca  | aaaatctaac  | acaccgagtg  | caatgaatgc  | atcgattcat  | cgcagtctca  |
| 14101 | atcagtggtc  | cgaagtgttt  | ttttggcaca  | gccctcttat  | gctcatcaag  | tctgctgggt  |
| 14161 | cctttcccat  | aagccatcgt  | gatattcttgc | aaatcgcatt  | caccaccctg  | atcgcaaatt  |
| 14221 | gggcaatcaa  | gcgggtgggt  | aattagcaaa  | aactcaagca  | caccttcacg  | tgctttttta  |
| 14281 | accttagggg  | tatcagtgtg  | aataaccatc  | ccttctgcaa  | ctggcattgc  | acaagaggct  |
| 14341 | actggttttg  | gagggtccacc | ctccacttca  | accaaacaca  | ttctgcagtt  | accagcaatt  |
| 14401 | gctaaacgct  | catgataaca  | aaaacgtgga  | atttcaacgc  | ccacgacttc  | acaagcttga  |
| 14461 | attatagtga  | gcccattgctc | tacttcacat  | tccttagaat  | taatagtaac  | tttaaccaca  |
| 14521 | actattatac  | agcttcccac  | tttataggat  | tgccgcttac  | ctcatcttca  | accagattgc  |
| 14581 | cgttgtcata  | ttgagcagac  | atataattca  | tgcgcgaaatc | acgatctata  | tatctaacag  |
| 14641 | gttttaccgg  | tttatcttta  | tacatttttt  | gctcagcttt  | cttacgctga  | gtaggggttat |
| 14701 | ttttactagc  | tgtcttttgc  | ttcccacctg  | ctgccatata  | aactcctaaa  | aacttttcat  |
| 14761 | tctatttttaa | cacttaagta  | tatagcgtca  | atattttaata | actttaaaaat | ttcaatagat  |
| 14821 | ctcttatttat | aatcattttta | caatcattgt  | ttaaataaaaa | agttaccctt  | tgatgccatt  |
| 14881 | ccagcgcagt  | acgcacagct  | gtacgaacat  | tgcaatttgc  | aggcaatttg  | cgtggcagat  |
| 14941 | tcaagtagct  | gacactgggt  | cccatccaag  | acagcagtag  | cccttttcggt | gttatttcag  |
| 15001 | tgcttgacac  | tgaaatccag  | gttttgattg  | gatactgagt  | tggtaaagcat | aaaagtgtag  |
| 15061 | ctaacgcgag  | ctctacgtca  | taccgcgatt  | tattcgcggt  | atctcaaagc  | atagatcccg  |
| 15121 | ctaacacgta  | gcgggatgac  | gattgtcgtt  | tagctataaaa | cattaagaaa  | tttaccaaac  |
| 15181 | gaaaaaaaaag | gcaaaagaag  | ccctgggggt  | attatccgct  | ttaaaaatatt | ggcgtttttt  |
| 15241 | atgtttttaa  | cgcttgacaa  | gcaagattaa  | gctgctttta  | attgcaacta  | acttacgctg  |
| 15301 | caaatgttta  | agaaattttac | taagcagaaa  | aaaagacaaa  | gaatccccga  | gttagctagt  |
| 15361 | cttttactat  | ctctgtcgag  | tattggcatt  | ttttgatgtc  | ttgtaacgct  | ttataagcgc  |
| 15421 | gttcagctta  | tttagataaaa | aatctagatg  | tagatgaagt  | tttgtaaaga  | catacagtat  |
| 15481 | ctatatactg  | caaaaaattg  | aacataagac  | gccgatacat  | taagtaatcc  | ttacctttta  |
| 15541 | atctgcagat  | tggcgaaagc  | aaatacaata  | gcttcagttt  | catgataagg  | gggctggcgg  |
| 15601 | agtttgtcaa  | ggaagtTTTTt | tcgttttctaa | cgattgttaa  | catgctgcaa  | aaaactatgc  |
| 15661 | aagaggtcta  | ccacttttatt | aggatatttgt | gcagttattg  | gtgttatcaa  | gatactccct  |
| 15721 | aatcttcttc  | aagtcctccc  | aggctaaacg  | tttttgtgcc  | ggttggcgaa  | gtaggttaagc |

|       |               |                |               |              |               |             |
|-------|---------------|----------------|---------------|--------------|---------------|-------------|
| 15781 | tg gat gaa at | at agc ggc tgc | tg gtg att ga | att ggacaaa  | tatt gggttag  | tgt acgtatg |
| 15841 | aa atctgcc a  | cg caa attcg   | at ata gtttt  | tgt gctgtca  | aga aggc t at | aac atgcgat |
| 15901 | tcccccgacc    | aaa attaaaa    | ttt gtggtga   | aact agtgca  | acgt gttttt   | cgacaaatgg  |
| 15961 | tctgcacata    | tca agctcta    | gg tgcggttg   | cttt ctattg  | ccagg cgggc   | gccaaaatac  |
| 16021 | ggtattgctt    | atataaactt     | tg gtgcg atc  | aag attgatt  | gcattt aaca   | ttttatcgag  |
| 16081 | caacattcca    | cttgcaccac     | aaa atgg tat  | gcctt gaagg  | tcttc atttg   | ctcctggagc  |
| 16141 | ttcaccaacg    | agcataattt     | ttgc atttg    | att accatcg  | gaaa agacag   | tatt agttgc |
| 16201 | agtttttttt    | atctcacaac     | ctt caaatga   | cttt actgca  | cttctt aatt   | catccacact  |
| 16261 | accacattta    | cctgcaagtt     | tcctt gcttc   | aattat ccaa  | tcactt ggaa   | acatgtcttt  |
| 16321 | tccatcttta    | gtgtcaccct     | agtgcgtatc    | tgc atctttc  | ttctgggtcc    | cagtttggat  |
| 16381 | aacagagggg    | tgcacactct     | ctttgctctc    | caattttttt   | tcctcttcac    | cctccattag  |
| 16441 | tgtgcaatca    | acgcccactt     | catggtaaaa    | ttttaataat   | tctaggtctt    | tattgctcat  |
| 16501 | attgcttttt    | aatcttttgt     | gcttttgtca    | tcgccat atc  | atactt taa    | ttagataaat  |
| 16561 | gtctaataata   | taatatgccg     | ttta agtgat   | ctaattcatg   | ctgaatacac    | cttgcaagcc  |
| 16621 | aaccactagc    | ttttagtgtt     | tg tcttcat    | tatcta agtc  | tttata tttc   | acagttagat  |
| 16681 | actttggacg    | cttaatttca     | tgactttgct    | ctggaattga   | aaggcatcct    | tccttgagaa  |
| 16741 | ttacttgttc    | atcggataat     | tctgtaatct    | caggattaat   | catgtaaaa     | ttgccagttg  |
| 16801 | agccatatcc    | tgctggctca     | ttttcaattg    | tttctagctg   | aatatccata    | acaaaaattc  |
| 16861 | tctttaacac    | tccaacttgc     | actgcagcaa    | ggccaagacc   | ttctgcatca    | tacatagttt  |
| 16921 | cgaacatgtc    | gtttactaat     | tctttaattt    | tatcgtttat   | atctgttact    | tcactggcac  |
| 16981 | gtgtgattag    | tctttcatca     | ggggcaatta    | caattggtaa   | tatggacata    | aaaattatca  |
| 17041 | ttctatgttt    | tacttttcct     | tttgtccaga    | atttagtgta   | tattaaaaatg   | ttgctatatc  |
| 17101 | tataatagaa    | atataaatta     | ttaaagaaag    | ctacaattta   | aatgaaattg    | cgtaataagg  |
| 17161 | ttaactaatg    | tactctgcag     | taatagcaaa    | accaaagaga   | aatgtttttg    | ctgttttaga  |
| 17221 | cataggtaca    | acaaaaatta     | tctgtcta at   | cg ttaagata  | aatggcaact    | tcagctataa  |
| 17281 | agtaacagga    | acgggttata     | agattgcaga    | aggtgtaaac   | ggtggatcaa    | taactaatgt  |
| 17341 | aaaacacgca    | aattactcca     | tctcatcaac    | tataggttta   | gctgaacaag    | tatcagaaga  |
| 17401 | aaccatagat    | cagatatatg     | tgaacattgc    | tggatgtggc   | atctcatctt    | tcaatgtaca  |
| 17461 | taatgaaatt    | attgcagcta     | accatgagat    | ttctgagcgt   | gatataagac    | gttttagttt  |
| 17521 | tcaaacattt    | gagaaatata     | ttgaagacaa    | tg ttatcatt  | cacaatatac    | cactaaaata  |
| 17581 | tcacttagat    | gacatgactg     | acataaaaaga   | agttgggtgga  | ttgtacggaa    | aaagactatc  |
| 17641 | tgctgatggt    | aatgttgtca     | ctgcttcgcg    | tccagcgcct   | accaatattg    | aaaactgtat  |
| 17701 | taccaataat    | ggtggattaa     | atatggcagg    | ttgtattgct   | tctgcatatt    | ctgcaggctc  |
| 17761 | tgcggtgtctc   | agtgaagatg     | aaaaagagct    | cgggactgct   | attgttgata    | taggcggtgg  |
| 17821 | gtgcactgca    | attggaattt     | tcaaaagagg    | gaaacttggtg  | tatgcaagca    | gcgttccaat  |
| 17881 | tgggtggcgtt   | catatcactc     | gagatattgc    | ttacgggcta   | tgcacaagca    | tagaacgtgc  |
| 17941 | agagtatata    | aaaatactgt     | atggtagcac    | tatcgtaact   | tcaatagatg    | agaacgaata  |
| 18001 | tattacagtc    | caaaatagtg     | aaaatgatga    | acctactcaa   | gtattcaaat    | ctgagcttat  |
| 18061 | taacatcata    | agaccaagag     | ttgaagaaat    | acttgaaatg   | gtaagagagc    | aatttcaaga  |
| 18121 | gcagaaagat    | ccaattaata     | aagtagtgat    | cacagggtgga  | actagtcaac    | ttacaagcat  |
| 18181 | gaaggaaatt    | gcaggctata     | tattcaataa    | acaagttcga   | attgggtccc    | ctgaatctct  |
| 18241 | cagtggcctt    | gatggcgaat     | atgataaaaa    | tcctgtattt   | tctgctgcta    | taggttctat  |
| 18301 | aaagctaata    | gttgacactt     | tttataaaaa    | taactctggt   | atgttaggac    | aagatggtaa  |
| 18361 | aatgagtaaa    | ttgtataatt     | gggttaaatac   | aaaagttaca   | gtttaatttt    | actgaatgaa  |
| 18421 | attcttatat    | ctatcaaagg     | aaacattatg    | aataaaaaaac  | attgtttcaa    | aattaataaa  |
| 18481 | ttggttcgtg    | atcatacaac     | tgaaattata    | cg tttcccatg | gaattattgt    | ttatgagagg  |
| 18541 | gtgatggaaa    | aagatgaata     | cattgaacgt    | ctcaaagata   | aactttttaga   | agaagcaaag  |
| 18601 | gaagttattg    | cctctaaaac     | tccagatgaa    | aatcttgaag   | agttagccga    | tttacttgag  |
| 18661 | gtcatacatg    | cattaggcaa     | agaaagtgga    | ctatcaatag   | aacaaattga    | agaaaagcgt  |
| 18721 | atctctaaaa    | aacaagagag     | aggtgggtttt   | gagaatcgta   | tctataatac    | ttacattgag  |
| 18781 | gtgaattcta    | agagcatcga     | ttactatcac    | aaaaaacctt   | cagattatcc    | tgagataata  |
| 18841 | gttgatatagt   | tcagattatt     | aaatagactt    | cttgcttgac   | cacctttcat    | acaaatgact  |
| 18901 | tgacgctagg    | atccataggg     | cttatttttca   | taatacgcaa   | agttattaca    | tttatgtact  |
| 18961 | gcaagtaagc    | gtaccaatta     | taataagaca    | tggaaaaatat  | gaacataact    | atacactcac  |
| 19021 | aagaagatth    | tgaatttatg     | cgcaaggctg    | gcaggcttgc   | tgctgaaact    | cttgatttca  |
| 19081 | ttgcaccgta    | cgtaaaggta     | ggggtgacaa    | cta atgaatt  | aatgatcta     | tgccatgact  |
| 19141 | ttataattaa    | tgcaggtgca     | attccagcac    | cactaaacta   | taggggggtat   | ccaaaatcaa  |
| 19201 | tttgcacttc    | aaaaaatgca     | gttggtgtgcc   | atgggtgttcc  | cgatgataaa    | ccgcttaaag  |
| 19261 | atggagatat    | tttaaatatt     | gatgtcacgg    | tgatttttaa   | tgggttggcat   | ggtgatacaa  |
| 19321 | gtcgc atggt   | ttgggttggc     | aaaccatcaa    | tcaaagcaaa   | acgttttatgt   | gatgctactt  |

|       |             |             |             |             |             |            |
|-------|-------------|-------------|-------------|-------------|-------------|------------|
| 19381 | ataatgcggtt | gatggaagca  | atcaaacaag  | ttaagcccgg  | caataagtta  | aatgaaatag |
| 19441 | ggcttgctat  | agagaaatat  | attagagatt  | ttggatat    | tatcgtacgc  | agctactgcg |
| 19501 | gacatgggtat | aggaaaagtc  | tttcatgctc  | caccaaagt   | agtgcatttc  | tatgatcaag |
| 19561 | atgaagatct  | tgtcttaaag  | gaaggatatgt | tttttacaat  | agagccaatg  | attaatgctg |
| 19621 | gaaaacatga  | gactctgctc  | agtaaactcg  | atgactggac  | agtaacaaca  | cgcgatcttt |
| 19681 | cactttctgc  | tcaatttgag  | catacacttg  | gagtgcacaa  | agatgggtgct | gaaatattca |
| 19741 | cattatcacc  | taagaattgg  | catttcccac  | cttataatta  | gattttttta  | aattctgcta |
| 19801 | tactgcaact  | atacttggtt  | tactttgggt  | gattttgaag  | aaagctcacc  | cttaatttgc |
| 19861 | gatatagcaa  | ctagcccaat  | taatgcacag  | aaaatcatgt  | aaaaactagc  | tgaagtctct |
| 19921 | tgtcctgtaa  | ccttgataat  | tgttgtgcat  | ataaatgggtg | caaggccgcc  | aaaaaatcca |
| 19981 | gcagctatat  | ttcttgataa  | accaaattcca | ctgtaccgaa  | cctttgttgg  | aaataattcg |
| 20041 | cacataagt   | cactgcacag  | accaagcgat  | gcagctattg  | gaattataaa  | aagaatgtgt |
| 20101 | gccagcaagt  | aattgctact  | acataacatt  | gaaaaaactg  | gataactcac  | tattataaaa |
| 20161 | gctataaatg  | caaacttcat  | aactttttct  | cttctctact  | tatcagaaag  | tattgcaaac |
| 20221 | aatactgtca  | atcctccgag  | cgcaatttga  | ctcagtattt  | ccactatatg  | attaaaatga |
| 20281 | gtattttactg | ttaatatattt | attcgtaagc  | acattgaaaa  | ataccagata  | tatgtaaaga |
| 20341 | gatgagtttt  | caactatatc  | aaccccaact  | gatatcagaa  | aaggtttttt  | atagctattt |
| 20401 | aataactctt  | ttaatggcaa  | tttagatgga  | tttttctgct  | ttttatactc  | tgggctttca |
| 20461 | tcaagtatat  | atctcatata  | tatgctaatt  | aatcccattg  | ctaaactgaa  | aatgaaaggt |
| 20521 | aatctccacc  | ccaagattc   | aaaatcagat  | acttttttgc  | atatgagtac  | cgctatcaag |
| 20581 | cttaatactg  | aacccaaaaat | tgcgcttaat  | acttcaatgc  | tgccaaaaaa  | tccttttttg |
| 20641 | tttttaggag  | catgttctat  | taaaaatgg   | gcatttcctg  | cttctcctcc  | aagagatata |
| 20701 | ccctgcaata  | accttaaaca  | aactaccagc  | attgatgcta  | gtattccaat  | gctttgataa |
| 20761 | cctggaacaa  | aagcaattaa  | tacggttgat  | agagtcatta  | atataatcga  | gagcaataag |
| 20821 | gcaactcttc  | tgccatgctt  | atcaccaatg  | tgaccaaata  | tagcagcacc  | gactggtctc |
| 20881 | attaagaaac  | ccactgcaaa  | cactccaaaa  | gctttcaata  | cgctgggttag | ttgatcatcc |
| 20941 | gatggaaaaa  | acacactacc  | tattatgttt  | attaagtggc  | caaaaagcat  | gtggtcatac |
| 21001 | cacaataaag  | tgttacaaat  | caaacttgaa  | aatattactt  | ttgttatttg  | ctgcataatt |
| 21061 | ttctatagtt  | tgttttagtat | ttagtaatat  | acattacttt  | tttttatata  | atagaaaaat |
| 21121 | ttgaacatca  | tattaataat  | agcatcttat  | taaatcttaa  | tattttttata | tcattgacta |
| 21181 | tattcaagt   | tttttatatt  | attgcctata  | tacttccata  | tgtttttagtg | ggaagtattt |
| 21241 | tttatttgta  | tgcacagagt  | ctcttgatgg  | agcactatga  | cacacactcc  | agttttgtta |
| 21301 | aaagagatgc  | tatcactact  | atcacccgag  | gatgatggta  | tatatgtgga  | cgccacattt |
| 21361 | ggagctggag  | ggtatagcaa  | agcaatattg  | gagtcagctg  | attgcaaagt  | atatgcaatt |
| 21421 | gatagagatg  | aaacggtaac  | taagttttat  | gatgatttta  | gcattagata  | tcccgataga |
| 21481 | ataaaaactat | ttattgagaa  | gttttagtaat | gttaaaaaatt | tattagatag  | caacaatatt |
| 21541 | gaaggtatcg  | atggaatagt  | ttttgacatc  | ggagtttcat  | ctatgcagct  | tgataacgga |
| 21601 | gatagagggg  | tctcattttt  | acatgatgg   | ccactcgata  | tgagtatgga  | taactcttct |
| 21661 | tatataaacg  | cttcaacggt  | tgttaacgct  | ttacgcgaag  | aagaaatcgc  | aaatactata |
| 21721 | tataactacg  | gaggcgaaacg | tcattctcgc  | aaaatcgcaa  | gagcaatagt  | aatgacacgg |
| 21781 | aagaagaaaa  | ctatcaaaaac | tacatttgag  | cttgccgata  | ttgtacgttc  | tgtggtgttt |
| 21841 | cgtggaaaaa  | gcaaaattga  | tcctgcaacc  | agaacatttc  | aggcaatcag  | aatatgggta |
| 21901 | aacgatgagc  | tgggagaact  | tgaaaagggc  | attaaagctg  | catctgagat  | tttaagttag |
| 21961 | aatggcaaat  | taattgtcgt  | cacctttcat  | tccttagaag  | atcgtatagt  | caaaactttt |
| 22021 | tttaaagatt  | tatgtgctac  | tgattgcaag  | acattctctc  | ttctaaataa  | aaaagtgatc |
| 22081 | gaagcaagta  | tagaagaagt  | aagtgcaaat  | ccgcgttcac  | gctcagcaaa  | actaagagct |
| 22141 | atacagagg   | tgtcatgaga  | actttctgca  | tcatctcaat  | agttatgttt  | tttcttagca |
| 22201 | ttgtaggact  | atttaaggta  | aaattacatg  | ttcagtcatt  | aaatagagag  | ctaataaaaa |
| 22261 | taaaaagtga  | aattaattta  | gtgcaaagt   | atatgaaagt  | tttacaagca  | gaatggagct |
| 22321 | atttgaataa  | tccaaaaag   | cttgcaagtc  | ttgtaaagaa  | atacctgaaa  | aataactctt |
| 22381 | taatactggc  | tagccaggtt  | aaaaatcttg  | actctttaaa  | tggccgcag   | gtgctagcac |
| 22441 | aacttaaaat  | ccatgatcaa  | cagtgaagatt | aagtcttatt  | ttttacagat  | gagcacatca |
| 22501 | caataaaaact | tactttgtat  | ccgttcagga  | tagcggcaag  | gtagtataac  | catagagtaa |
| 22561 | aagtgaagttt | acaacaaatg  | gtgtcatccc  | agtgttgac   | actgggatcc  | agcctttcca |
| 22621 | taatcatcaa  | aaacattgta  | ttttaacgta  | aaacagctat  | ttttatgctt  | accaacttaa |
| 22681 | taaaattcct  | ggatcccagt  | gggctttgtt  | gcacgcgtag  | ctatgatgga  | ttaaagataa |
| 22741 | aaaagatagt  | gaatatcagt  | agcttattat  | tctggatttt  | ataacaagaa  | cggtcagtga |
| 22801 | atacctaaat  | ttgagtaaaa  | gaaatttcac  | taccactcac  | taatccggct  | aaaattcaag |
| 22861 | aattttcaatg | cttttagctat | tttcaataga  | attaaattta  | ttaatataaa  | taacaaatta |
| 22921 | ctattcttaa  | atttgatcag  | attgattgca  | aaaaaacaag  | attttcaata  | ggttgcttat |

|       |             |             |             |             |             |             |
|-------|-------------|-------------|-------------|-------------|-------------|-------------|
| 22981 | aatcctaact  | atagtttagcc | tttcataagt  | agcgatgcaa  | caaagccatc  | ccagtgtctg  |
| 23041 | ggcactggga  | tgacaaagga  | gagcagtgtc  | agctacttgc  | ataacaccat  | ttgttgtgca  |
| 23101 | acttacttta  | gtatgaaatt  | gcttgcgtaa  | gatttttgga  | gcctcttaac  | atTTTTTggc  |
| 23161 | atTTTcaatta | tgtatTTtaac | gttgcgTTTT  | tttgcgtaga  | atactgcttt  | ttcaagagaa  |
| 23221 | tcaaacttta  | atacaatctg  | TTTTTTTgga  | tctTTTtgagc | caacccaccc  | cattaaaggt  |
| 23281 | tcaatgtagt  | aagagccaga  | ttcaatTTTt  | aggtgccaga  | aatttTgtatt | acctaaccac  |
| 23341 | gattgtgttg  | cagTTTTTgt  | tggTTTTata  | atcctaataa  | ctactTTtat  | atcaatgccc  |
| 23401 | atagtttctg  | TTaaataagc  | TTaaatatat  | atcTTaataa  | atcTTTtcac  | aaacaattag  |
| 23461 | tatgaaagaa  | tgaagTTTga  | aataaatatt  | TTtatgttat  | attattatta  | aattatatta  |
| 23521 | aaaggattag  | ctgaatagga  | gtaaccgatg  | acgcaacagg  | aaatagtaac  | aattaatgca  |
| 23581 | gagttacgtg  | atataacaaa  | aacaaaagcg  | atgcattctc  | taaggaagaa  | aggaaacatc  |
| 23641 | cctggaataa  | tatatggaaa  | gggccatgat  | aatgtaaatt  | tgacattgtc  | tgcaaaggaa  |
| 23701 | ttcacgaagc  | aatataaatc  | aggTtctctt  | tctgcacatt  | tgatagagct  | gaatatttcg  |
| 23761 | ggcaaaaagg  | aatatgctct  | tgttcgcgat  | atccaattgc  | atgtagtaaa  | ggatactgtg  |
| 23821 | caacatgttg  | atTTTcaatt  | tgttgataaa  | ggcagtgaag  | TTaaaataga  | catacctcta  |
| 23881 | tcattTgtga  | atgaaagtaa  | agccccaggg  | atcaagttag  | gtggagtgtc  | taatgtTTTg  |
| 23941 | tgtcgttcta  | ttgctgttaa  | atgctctcct  | gataaaatac  | ctcaggTTat  | tgaagttgat  |
| 24001 | ttatccggta  | aaatgattgg  | ccagtctata  | catattaatg  | atgTaaaatt  | accagaaggt  |
| 24061 | gttaagTTTg  | tagcccatga  | agaagaaaat  | TTTaccattg  | TTacaatttc  | tgctgccgat  |
| 24121 | agtgacgttg  | aagaacctca  | agcagaaaca  | gaggaatagt  | gcacctgata  | gttgggcttg  |
| 24181 | gtaaccctgg  | tagtcaatat  | gagTTaactc  | atcataatat  | cggctTcatc  | gtagttgata  |
| 24241 | caattTgcaa  | atattggaat  | TTccagtcgt  | tctctaataa  | agccgattat  | ctaataacct  |
| 24301 | ctggcataat  | taatgataat  | aaaatcatgt  | taataaagcc  | TTattcattt  | atgaataatt  |
| 24361 | caggcatccc  | tgttgcaaaa  | atacgaaatt  | TTTacaattt  | atcgctagat  | aatattgttg  |
| 24421 | tcatacacga  | tgacgctgat  | ttggaacttg  | gaagaataaa  | aataaagaaa  | ggtggtagct  |
| 24481 | ctgctggaca  | taatggactt  | aaatccatag  | atagTTTtat  | tggaacgat   | tattggcgct  |
| 24541 | tgagattTgg  | agtgggtaga  | cctgaagatc  | aaagaagctt  | agcagattat  | gtgttatcaa  |
| 24601 | aattTTTcaa  | TTTTgataat  | gttactTcct  | tagtggaaaa  | aatagcaaaa  | aatatacact  |
| 24661 | taatgctgca  | aggagataat  | acagctTTTt  | tcaattTgat  | tgtataatat  | tacgaaacac  |
| 24721 | agggagtgtg  | tggTcccaga  | gtgtgatggT  | gtggatttag  | tatgaacaat  | tcaggagatt  |
| 24781 | ttgtccactg  | taaagatata  | aactcaaaaag | gtgtaagacc  | cttaagagtt  | ttgagtcttt  |
| 24841 | tagcataatt  | gtaggccata  | acaaaagtcac | aaagatgctc  | TTtgagTTgc  | tggTgagact  |
| 24901 | gatagtaata  | cttcttaaca  | gtggcattct  | TTaaagTTTt  | gttcatacgc  | tcaacttgcc  |
| 24961 | cattTgtcca  | aggatggcta  | actTTTgtTa  | gacggTgttc  | aatgtcattt  | tcttcacaag  |
| 25021 | ctctatcaaa  | tatatgttga  | aaagcgtatt  | tatggcgTTt  | ttggTTggTa  | aattgtacac  |
| 25081 | tgTTtatctgt | caaaaatagt  | tggattTTTat | atggTaaaat  | TTTaatcaaa  | TTacgtagaa  |
| 25141 | actcagcagc  | tataggTTTt  | gtagcactTT  | tatacaactc  | aacatacgtg  | aattTggatg  |
| 25201 | TTctatctat  | tgcaacaaaac | aaatataact  | TTcctTcttc  | tgtTctgact  | tctgcaatat  |
| 25261 | caatatggaa  | atagcctata  | ggatattgtt  | tgaattTctt  | TTTTggTTTa  | actTcgccat  |
| 25321 | caacatctgg  | tagtctgcta  | atgctgtgcc  | tctgtaagca  | acgatgtaga  | ctagagcgag  |
| 25381 | tcaagtgtgg  | gattgaggTt  | tgcaaaagcg  | agagacaatc  | atctaattgg  | aatagagtat  |
| 25441 | gcttacgaaa  | tgcaacaatt  | acagcctcct  | cttctaaggt  | taaaacaggt  | gatcttgcat  |
| 25501 | gcttcggacc  | catatcagcg  | tctTTggcaa  | aagaccgTTt  | tctccattTa  | atgatagTTt  |
| 25561 | ttggattaaag | gttatagtac  | ctggagagTt  | ttgctatgct  | ctctTTtacta | TTTTgtattg  |
| 25621 | ctctacgaat  | tgtctctgtt  | gtTTTggcgc  | acccatgtaa  | tattTgtccc  | ataattcctc  |
| 25681 | ctTTgatggT  | attgtTTTct  | catattTTTat | cataccatca  | cactctggga  | ccatacatcc  |
| 25741 | ccccctcccc  | cctaattcct  | atatcaaaac  | TTTctTTtact | agattatata  | gtcaatataa  |
| 25801 | aaagccatat  | aaaattgctt  | ccactgctgc  | catgaggaaa  | ttgcttattc  | ttgctaactc  |
| 25861 | TTtagtcaga  | gatgacaggg  | TTTTTactga  | ggaatataac  | tctctgtctg  | TTTctatcta  |
| 25921 | agagccagca  | tagctgtgga  | taagtactTT  | tatctgtata  | aacgtgctTa  | tccacagcta  |
| 25981 | catcaattTT  | tctattgact  | TTTaaacaaa  | ctgctgaaca  | gatacattcg  | tcatcccgtc  |
| 26041 | acgtgttagc  | ggccaagata  | ccgcggcggt  | atgccgtggg  | aaacctgact  | tgcattagct  |
| 26101 | ataaaaatagt | gattTtatata | aatcccatag  | catgccgaat  | gaagcgTTTt  | ttgaggaaat  |
| 26161 | ttgaattTTTc | aactgcaatc  | aagccaagat  | TTcttagtgc  | TTtagcgcag  | aatattctgt  |
| 26221 | tggaaaacat  | cctattTTaat | ccatcagTTg  | caagcgccat  | tgtaaaaatta | tcaaagtatc  |
| 26281 | tgttacgtga  | aattTTTctTT | aataaataac  | tactgccaac  | atcaatacca  | gatgctTTTg  |
| 26341 | cggcaactac  | gtgctTTtata | atactTTTcta | catctctaata | tccaagatta  | agcccttgac  |
| 26401 | ctgcaactgg  | atgaattgaa  | tgtgctgcat  | cgccgataag  | caaaactcta  | cccttatata  |
| 26461 | actTTTTTtgc | aaaagcaaaa  | ctTaaaggat  | aaagTTTtct  | TTcaccctct  | aattTTtatct |
| 26521 | ctcctaataa  | agaaccaaata | ctTTTTTTtaa | gctctataat  | aaattcttct  | tcagacagat  |

```

26581 ccattagcat ttttgaaatt tcagattttt ctgtccaaac tatcgaagaa gtatagccac
26641 ccttcacgga tagaattgca aatggaccgc caggaaaaaa acgctctaca gctaagtttt
26701 ggtgatgcag ttcatgcttt acattaaata ctatgctact ttgtttatag tcaaatttca
26761 ctgtcgggat agaaaataac tctggtaatt tagagtgttt gccttcagcg cagataagta
26821 gcgatgatat taattcctgg ttattatcaa gaataacttc cacatatcct gaatcataag
26881 caattgtttt ataggaatgt ggagagtata tatttagttt attcagaaaa ttattgttga
26941 ttgcattcca tatagcagca ttgttaataa cataacccat tggttcttca ccaaccattt
27001 tatgattgta atgcacagta accgcatcta atatgcatat atcaagtatt ggctcagctt
27061 cgctttctat aaactgccaa atccctaatt tttccaatat ttttttcgag ccttgagaaa
27121 tagcaaatgc tcggttgtca tctactacac gtggcaaact atttttttca attacagcta
27181 cagacacaga gttacaactg aggccaattg cagtaataag accaagtaac ccaccacgtg
27241 aaatgattac atcataattc attttattta cgctaattgt aaaattatat tttatctatt
27301 ttgaaaatag ttttaa

```

//

```

LOCUS      JAQZAU010000097          5636 bp    dna        linear    ENV 17-MAR-2023
DEFINITION MAG: Wolbachia pipientis isolate wEsol contig_49027, whole genome
            shotgun sequence.
ACCESSION  JAQZAU010000097  JAQZAU010000000
VERSION    JAQZAU010000097.1
DBLINK     BioProject: PRJNA929258
            BioSample: SAMN33142973
KEYWORDS   WGS; ENV; Metagenome Assembled Genome; MAG.
SOURCE     Wolbachia pipientis (insect metagenome)
ORGANISM   Wolbachia pipientis
            Bacteria; Pseudomonadota; Alphaproteobacteria; Rickettsiales;
            Anaplasmataceae; Wolbachieae; Wolbachia.
REFERENCE  1  (bases 1 to 5636)
AUTHORS    Fiutek,N., Couger,B.M., Roy,S., de la Torre,J.R. and Connor,E.F.
TITLE      Genomic assessment of the contribution of the Wolbachia
            endosymbiont of Eurosta solidaginis to gall-induction
JOURNAL     International Journal Molecular Sciences
REFERENCE  2  (bases 1 to 5636)
AUTHORS    Fiutek,N., Couger,B.M., Roy,S., de la Torre,J.R. and Connor,E.F.
TITLE      Direct Submission
JOURNAL     Submitted (10-FEB-2023) Biology, San Francisco State University,
            1600 Holloway Ave, San Francisco, CA 94132, USA
COMMENT     ##Genome-Assembly-Data-START##
            Assembly Date      :: JUN-2019
            Assembly Method    :: FLYE v. 06-2019
            Genome Representation :: Full
            Expected Final Version :: Yes
            Genome Coverage     :: 100.0x
            Sequencing Technology :: Illumina HiSeq; PacBio Sequel
            ##Genome-Assembly-Data-END##
FEATURES   Location/Qualifiers
            source              1..5636
                                 /organism="Wolbachia pipientis"
                                 /mol_type="genomic DNA"
                                 /submitter_seqid="contig_49027"
                                 /isolate="wEsol"
                                 /isolation_source="galls on Solidago altissima"
                                 /host="Eurosta solidaginis MN-2018-EFC"
                                 /db_xref="taxon:955"
                                 /environmental_sample
                                 /country="USA: Cowling Arboretum, Carleton College,
                                 Northfield, MN"
                                 /lat_lon="44.48 N 93.13 W"
                                 /altitude="280 m"
                                 /collection_date="2018-11"
                                 /metagenome_source="insect metagenome"

```

```

gene      /note="metagenomic"
68..244
/locus_tag="wEsol_01089"
CDS       68..244
/locus_tag="wEsol_01089"
/codon_start=1
/transl_table=11
/fullproduct="qcoverage 100 , hcoverage 100 , similarity
100 , identity 98.3 , evalue 1.97e-30 , alnlength 58 ,
Bacteria , Proteobacteria , WP_155968847.1 hypothetical
protein [Wolbachia pipientis]"
/translation="MKKKAKEALGLLSALKYWRFLCFKRLTSEIQLLLIATNLRCKCL
RSLLSRKKDKESPS"
/product="hypothetical protein"
/besthit="qcoverage 100 , hcoverage 100 , similarity 100
, identity 98.3 , evalue 1.97e-30 , alnlength 58 ,
Bacteria , Proteobacteria , WP_155968847.1 hypothetical
protein [Wolbachia pipientis]"
gene      779..1399
/locus_tag="wEsol_01090"
CDS       779..1399
/locus_tag="wEsol_01090"
/codon_start=1
/transl_table=11
/fullproduct="qcoverage 100 , hcoverage 100 , similarity
100 , identity 100 , evalue 5.99e-147 , alnlength 206 ,
Bacteria , Proteobacteria , WP_015589270.1 MULTISPECIES:
3'-5' exonuclease [Wolbachia]"
/cog="Rnd COG0349 361 Ribonuclease D"
/pfam="DNA_pol_A_exo1 RNase_H_2"
/tigr="TIGR01388 rnd 363 ribonuclease D"
/product="3'-5' exonuclease"
/translation="MGIFLYKDDLPASSIPDDVRSIAVDTEAMGLLHSRDRCLVQLS
FNDGNAHLVQLKNDYTAPNLRKILEDKNITKIFHFARFDVSIIRYYLETWALPCYCTK
IASRLVPTYTDNHSCLKELCLELLDTKLNKQQQSSDWGNENLTDKQKSYAASDVLYLHR
IKEKLDLMLERENRKELAQKCFEFLPTRIELDLMGWENVDFNHQM"
/besthit="qcoverage 100 , hcoverage 100 , similarity 100
, identity 100 , evalue 5.99e-147 , alnlength 206 ,
Bacteria , Proteobacteria , WP_015589270.1 MULTISPECIES:
3'-5' exonuclease [Wolbachia]"
gene      1516..1839
/locus_tag="wEsol_01091"
CDS       1516..1839
/locus_tag="wEsol_01091"
/codon_start=1
/transl_table=11
/fullproduct="qcoverage 100 , hcoverage 100 , similarity
100 , identity 100 , evalue 3.58e-73 , alnlength 107 ,
Bacteria , Proteobacteria , WP_006279168.1 MULTISPECIES:
thioredoxin [Wolbachia]"
/cog="COG3118 COG3118 304 Thioredoxin domain-containing
protein"
/pfam="Thioredoxin Pfam-B_14854 AhpC-TSA Redoxin
Thioredoxin_8 Thioredoxin_2 Thioredoxin_6 Thioredoxin_7
DUF836 Thioredoxin_3 Thioredoxin_8"
/tigr="TIGR01068 thioredoxin 101 thioredoxin"
/product="thioredoxin"
/translation="MSDDITSVNDQNFKSEVTDYKGFVLIDFWAEWCGPCKSLMPRIE
QLAKDRKGKIKICKFDIDEGTEVPSKYGVQSIPTLIIFQDGKEIARKIGATNDLSSWV
DSEIS"

```

```

        /besthit="qcoverage 100 , hcoverage 100 , similarity 100
        , identity 100 , evalue 3.58e-73 , alnlength 107 ,
        Bacteria , Proteobacteria , WP_006279168.1 MULTISPECIES:
        thioredoxin [Wolbachia]"
gene      2029..2685
        /locus_tag="wEsol_01092"
CDS       2029..2685
        /locus_tag="wEsol_01092"
        /codon_start=1
        /transl_table=11
        /fullproduct="qcoverage 100 , hcoverage 100 , similarity
        100 , identity 100 , evalue 5.52e-158 , alnlength 218 ,
        Bacteria , Proteobacteria , WP_141457380.1 MULTISPECIES:
        CADD family putative folate metabolism protein
        [unclassified Wolbachia]"
        /cog="COG5424 COG5424 242 Pyrroloquinoline quinone
        (Coenzyme PQQ) biosynthesis protein C"
        /pfam="Pfam-B_412 TENA_THI-4 Pfam-B_1431"
        /tigr="TIGR02111 PQQ_syn_pqqC 239 coenzyme PQQ
        biosynthesis protein C"
        /product="CADD family
        putative folate metabolism protein"
        /translation="MKFTKSLNNKLDELHLLNHPFYQSWNTGSLSLQALQTYAKEYYH
        HVAAFPRIYISGIHFLCPDLKMRQVLLGNLIEEEQGDENHPELWQRFAEGLGVARSDLR
        ESAQIKETQELVDGYFDIVRSFGAAGLGALYAYERQTPEVSKSKIEGLKKHYSISDEC
        SLQFFTVHMEADEWHSEECANLIEDLDEKEQDKVMQGAQKGAKLLWGFLDGMINASVC
        "

        /besthit="qcoverage 100 , hcoverage 100 , similarity 100
        , identity 100 , evalue 5.52e-158 , alnlength 218 ,
        Bacteria , Proteobacteria , WP_141457380.1 MULTISPECIES:
        CADD family putative folate metabolism protein
        [unclassified Wolbachia]"
gene      2725..3111
        /locus_tag="wEsol_01093"
CDS       2725..3111
        /locus_tag="wEsol_01093"
        /codon_start=1
        /transl_table=11
        /fullproduct="qcoverage 100 , hcoverage 100 , similarity
        100 , identity 100 , evalue 7.77e-87 , alnlength 128 ,
        Bacteria , Proteobacteria , WP_007548841.1 MULTISPECIES:
        dihydroneopterin aldolase [Wolbachia]"
        /cog="FolB COG1539 121 Dihyroneopterin aldolase"
        /pfam="FolB"
        /tigr="TIGR00525 folB 116 dihydroneopterin aldolase"
        /product="dihyroneopterin
        aldolase"
        /translation="MSACNLLISDLRLWVHLGYSAEEKYHSQLVSVNIDFTFKSPPLG
        LTTDRLEDTICYLEVQSIQSLVQSKQFNLIEHLTHDIYRTINNLMQKKLIISSIGV
        TIHKVAPPVPSVHGGVFFTYRNALQE"

        /besthit="qcoverage 100 , hcoverage 100 , similarity 100
        , identity 100 , evalue 7.77e-87 , alnlength 128 ,
        Bacteria , Proteobacteria , WP_007548841.1 MULTISPECIES:
        dihydroneopterin aldolase [Wolbachia]"
gene      3108..4388
        /locus_tag="wEsol_01094"
CDS       3108..4388
        /locus_tag="wEsol_01094"
        /codon_start=1
        /transl_table=11

```

```

/pfam="HPPK Pterin_bind"
/fullproduct="qcoverage 100 , hcoverage 100 , similarity
100 , identity 100 , evalue 5.71e-315 , alnlength 426 ,
Bacteria , Proteobacteria , WP_141457249.1 MULTISPECIES:
dihydropteroate synthase [unclassified Wolbachia]"
/translation="MIYISIGSNMGNRFSHLQKAAQLLQERYFKNLKSSIILETKAIL
PNDAPPGWDRPFLNMVVYGSCSSSPEELLKGLKQIECDIGRPQVYEKWAPRVIDLDIL
LWDNLTLDTSYLKIPHELINRPFLLHLMAMLSMAVVNKTFTGTINPNIKDCFLRSFT
LSPELVGIVNITPDSFSDGGLYYDADQATKQALQLVSDGASIVDLGAQSTRPGSSIQT
PKAEYARLKPVLDNLNQYMKVGDIVKVSIDSFWDVILNVLEHYNIAWINNQKGDLDN
TLKAVASNGCSIVIMHSLSIPPHRDNIIPDDTDPIDIINNWAESISRLTLGFDQSS
IIIDPGIGFGKSLYQNIWLLCNIEALQSFGCKVLVGHRSRKSFISSFSTEPVFNRDLET
IALSSALHNKVDFLRVHNVRDHMRFFVAQAALQG"
/product="dihydropteroate
synthase"
/besthit="qcoverage 100 , hcoverage 100 , similarity 100
, identity 100 , evalue 5.71e-315 , alnlength 426 ,
Bacteria , Proteobacteria , WP_141457249.1 MULTISPECIES:
dihydropteroate synthase [unclassified Wolbachia]"
gene 4385..4864
/locus_tag="wEsol_01095"
CDS 4385..4864
/locus_tag="wEsol_01095"
/codon_start=1
/transl_table=11
/fullproduct="qcoverage 100 , hcoverage 100 , similarity
100 , identity 100 , evalue 1.62e-112 , alnlength 159 ,
Bacteria , Proteobacteria , WP_015589265.1 MULTISPECIES:
dihydrofolate reductase [unclassified Wolbachia]"
/cog="FolA COG0262 167 Dihydrofolate reductase"
/pfam="DHFR_1"
/product="dihydrofolate
reductase"
/translation="MIVIGIMAVDPKGVIGINNGLPWHYPSELDFRQVTDKQVIVMG
RKTFTMSQNILKDRIIPVVFSDKLNLCFNRGVKCTIISSMQEFLSIQNSKVFMIIG
AQIAHLFLEYDLISEFIITEIHKPYKGDVYFNLTLDDGWHKTILTKTKDYTICRLIR"
/besthit="qcoverage 100 , hcoverage 100 , similarity 100
, identity 100 , evalue 1.62e-112 , alnlength 159 ,
Bacteria , Proteobacteria , WP_015589265.1 MULTISPECIES:
dihydrofolate reductase [unclassified Wolbachia]"
gene 4866..5603
/locus_tag="wEsol_01096"
CDS 4866..5603
/locus_tag="wEsol_01096"
/codon_start=1
/transl_table=11
/fullproduct="qcoverage 100 , hcoverage 100 , similarity
100 , identity 100 , evalue 4.50e-175 , alnlength 245 ,
Bacteria , Proteobacteria , WP_015589264.1 MULTISPECIES:
putative folate metabolism gamma-glutamate ligase
[unclassified Wolbachia]"
/cog="COG1478 COG1478 257 GTP and metal dependent enzyme
involved F420 coenzyme biosynthesis (catalyzes addition
of two l-glutamates to F420 precursor)"
/pfam="F420_ligase"
/tigr="TIGR04132 intra_fol_E_lig 241 putative folate
metabolism gamma-glutamate ligase"
/product="putative folate
metabolism gamma-glutamate ligase"
/translation="MHVKAIYTHRIECGEVLEQVLDRIYVSELLGEEVVLAIITSKIISI

```

CQKQVVCKTACSKKEELIKREADAIVDVDHNSYGIYLTIKDNILIPSAGIDESNGNEMY  
ILYPKDVQKTALSIWNYLKTTHKCIKHLGILITDSNITPMRLGVTGVALGWCGFEPFYS  
YIGKPDLYDQPLQVTQVNLLDALATSAVLVMGEGAEQTPMAIISGAPKIHFLTRLPTT  
EEEEKSVKISMEEDLYSPLLMRARWLKS"

/besthit="qcoverage 100 , hcoverage 100 , similarity 100  
, identity 100 , evaluate 4.50e-175 , alnlength 245 ,  
Bacteria , Proteobacteria , WP\_015589264.1 MULTISPECIES:  
putative folate metabolism gamma-glutamate ligase  
[unclassified Wolbachia]"

gene 1882..1958  
/locus\_tag="wEsol\_tRNA-20"

tRNA 1882..1958  
/locus\_tag="wEsol\_tRNA-20"  
/gene="tRNA-Met"  
/intronpos="0..0"  
/program="tRNAscan-SE"  
/cove\_score="80.2"  
/evidence=predicted  
/type="Met"  
/anticodon=CAT  
/product="tRNA-Met (CAT)"

gene complement(533..605)  
/locus\_tag="wEsol\_tRNA-21"

tRNA complement(533..605)  
/locus\_tag="wEsol\_tRNA-21"  
/gene="tRNA-Gly"  
/intronpos="0..0"  
/program="tRNAscan-SE"  
/cove\_score="78.3"  
/evidence=predicted  
/type="Gly"  
/anticodon=GCC  
/product="tRNA-Gly (GCC)"

#### ORIGIN

```
1 agatcccgcgt aacacgtagc gggatgacgg ttgtcgttta gctataaata ttaaagaaat
61 ttactaaatg aaaaaaaagg caaaagaagc cctgggggta ttatccgctt taaaatattg
121 gcgttttttta tgtttttaaac gcttgacaag cgaaattcag ctgcttttaa ttgcaactaa
181 cttacgctgc aaatgttttaa gaagtttact aagcagaaaa aaagacaaag aatccccgag
241 ttagctagtc ttttactatc tctgtcgagt attagcattt tttgatgtct tgtaacgctt
301 tataagcgcg ttcagcttat ttagataaaa atctagatgt agatgaagtt ttgtaaagac
361 atacagtatc tatatactgc aaaaaattga acataagacg ccgatacatt aagtaatcct
421 taccttttaa tctgcagatt ggcgaaagca aatacaatag cttcagtttc atgataaggg
481 ggctagcgga gtttgtcaag ggatttttga cgaaatgatt ttgaaagtaa agagcgggag
541 aaggggttcg aaccctcgac ctcaaccttg gcaagattgc gctctaccaa ctgagctact
601 cccgcaatta aattaacctt aatttactta attataggca tatacagcaa tttgtaaacc
661 cccgtgtaca cgaaaaatgt gagagcccat aaacttgtgt ggttccttct atgatctttt
721 cgtatactta aggcttatth ttgattatca taagttttta attattccac aaagctttat
781 gggaaatatt ttatataaag acgacttgcc agctagttca ataccagatg atgtaagggtc
841 tatagctggt gataccgagg caatggggct acttcatagc agagatagat tatgccttgt
901 gcagctctct tttaatgatg gcaacgctca cttagttcaa ctcaagaacg attatacagc
961 gccaaatttg agaaaaatat tagaggataa aaatataact aaaatatttc acttcgcgcg
1021 atttgatgtg agcataatac gttattactt ggaaacttgg gcacttcctg gctattgcac
1081 aaaaatagct tcacgttttag ttcgcactta cacagataat catagcttaa aagagttgtg
1141 cttagagctg cttgatacca aactaaataa gcagcagcaa tcttctgatt ggggaaatga
1201 aaatttaaca gacaaacaaa aaagtatatg tgcactctgat gttttgtatc tccacaggat
1261 aaaggaaaag ctagacttaa tgctggaacg tgaaaataga aaagaattgg cccaaaagtg
1321 ctttgaattt cttcctactc gtattgagtt agacttaatg ggttgggaaa acgtggatat
1381 ctttaaccac cagatgtaat agaagttttt tgtttgtgca aaacacttta gggcaatttt
1441 tcaagctctg cggtaagaat ttagttgatt aactgctaag agatatgcta tattttacaa
1501 aaatttaggt attttatgag tgatgatatt acatcggtaa atgatcaaaa tttcaaactc
```

|      |             |             |            |             |             |             |
|------|-------------|-------------|------------|-------------|-------------|-------------|
| 1561 | gaagtcactg  | actataaagg  | gtttgttctg | atagactttt  | gggcagaatg  | gtgtgggcca  |
| 1621 | tgtaaaagtc  | taatgccacg  | tatcgaacaa | ttggctaaag  | acagaaaagg  | caagattaag  |
| 1681 | atctgcaaat  | tcgacataga  | tgaagggact | gaagtgccaa  | gtaagtatgg  | agtgcaatct  |
| 1741 | atacccactt  | taatcatatt  | tcaagatggg | aaggaaaattg | cacgcaaaat  | tgggtgcaaca |
| 1801 | aatgattttgt | caagttgggt  | tgatagttaa | ataagctaata | agacaaaattt | gctttttgtgt |
| 1861 | gtattataaaa | tattgataaaa | agggatttga | gctcagtcgg  | ttagagcagt  | tcgctcataa  |
| 1921 | cgaattggcc  | gtaggttcga  | gtcctaccaa | tcccaccatt  | gtagcatga   | tcgtaacaat  |
| 1981 | gagaaagctg  | tagtatatga  | actatatgtt | gatataatgg  | aggaaataat  | gaaatttact  |
| 2041 | aagtctctaa  | ataacaagtt  | agatgaattg | cacttactaa  | atcatccatt  | ttaccagtca  |
| 2101 | tggaatacag  | gaagcttaag  | cttgcaagct | ttacaaacct  | atgctaaaga  | atattatcac  |
| 2161 | cacgttgctg  | cgtttcctcg  | ttacatcagt | ggtatacatt  | ttttgtgccc  | agatctaaaa  |
| 2221 | atgcgacagg  | ttttacttgg  | taatttaata | gaagaggaac  | aagggtgatga | aaatcatcca  |
| 2281 | gaattatggc  | aacgttttgc  | tgaagggctt | ggcgttgcg   | gatctgatct  | tcgtgaaagt  |
| 2341 | gcacagatta  | aagagacaca  | ggagttagtt | gatggttact  | ttgatattgt  | aagatcaggt  |
| 2401 | tttgccgcag  | gtcctggagc  | cttatacgct | tacgaacgct  | aaactccaga  | ggtttctaag  |
| 2461 | tctaaaattg  | aaggtttaaa  | aaaacactat | tcaataagtg  | atgagtgttc  | tcttcaattt  |
| 2521 | tttacggttc  | atatggaagc  | tgatgagtgg | cattctgagg  | agtgtgcaaa  | tcttattgaa  |
| 2581 | gatctagatg  | aaaaagagca  | agataaagtt | atgcagggtg  | ctcaaaaggg  | agcaaagctc  |
| 2641 | ttgtgggggt  | ttcttgatgg  | gatgataaat | gccagtgtgt  | gtagtagttt  | gtagtagct   |
| 2701 | taaactcagt  | gatgttgga   | tgcaatgtct | gcatgtaatc  | ttcttatatc  | tgacttacgg  |
| 2761 | ctttgggttc  | atttaggcta  | tagtgcagaa | gagaagtatc  | attctcaatt  | agttagtgtt  |
| 2821 | aatattgatt  | ttaccttta   | atccccccct | ttaggactta  | caactgaccg  | gcttgaggat  |
| 2881 | actatatgct  | acttgagggt  | agttcagagt | attcaatctc  | tcgttcaaag  | caagcaattc  |
| 2941 | aacttaatcg  | agcatttaac  | tcatgatata | tacaggacca  | ttaataacct  | tgtgatgcaa  |
| 3001 | aaaaagctta  | ttatttcttc  | tataggcgta | actattcaca  | aagttgcacc  | acctgtcccc  |
| 3061 | agtgtgcatg  | gaggtgtttt  | ctttacttat | cgtaatgcgt  | tgcaagaatg  | atttacattt  |
| 3121 | ctattggctc  | aaatatgggg  | aatcgctttt | cccatttaca  | aaaggctgct  | cagttactgc  |
| 3181 | aggaacgcta  | ttttaaaaat  | ttaaaatctt | caattattct  | ggaaactaag  | gctattttac  |
| 3241 | caaatgatgc  | tcacacctgg  | tgggacaggc | catttctaaa  | tatgggtgtg  | tatggaagtt  |
| 3301 | gttcttcttc  | tcctgaagag  | ctgttaaagg | gccttaaaca  | aattgagtgt  | gacattggcc  |
| 3361 | gcccgcagg   | ctatgaaaaa  | tgggcacctc | gcgttattga  | tttggatatt  | ttgttatggg  |
| 3421 | ataacctgac  | acttgataca  | tcctacctta | agattcctca  | cccagaattg  | ataaacagac  |
| 3481 | cattttttgct | tcacttgatg  | gcaatgctga | gtcccatggc  | agtagttaac  | aaaacgtttg  |
| 3541 | gtactattaa  | ccctaacatt  | aaggattgct | ttttaaggag  | ttttacgctt  | tcaccagagc  |
| 3601 | ttgtaggtat  | tgttaatat   | actcctgatt | cattttcaga  | tggtggtctt  | tattatgatg  |
| 3661 | cagatcaagc  | aaccaagcaa  | gcactgcaac | tggtatcaga  | cggtgcaagt  | atagttgatc  |
| 3721 | ttggtgctca  | atcaacaaga  | cctggctcct | caatacaaac  | tccaaaagca  | gaatatgcac  |
| 3781 | gcttaaaaacc | agtgccttgat | aatctcaatc | agtatatgaa  | agttggtgat  | attaaagtca  |
| 3841 | gcattgatag  | tttctggcca  | gacgttat   | taaatgtttt  | ggaacactac  | aacattgcct  |
| 3901 | ggataaacia  | tcagaaggga  | gatctagatg | ataataacct  | aaaagcagtt  | gctagtaatg  |
| 3961 | gttgacagcat | cgttattatg  | cattcacttt | caataccacc  | acatagagac  | aacattattc  |
| 4021 | cagacgacac  | tgacccaatt  | gatatacata | ataattgggc  | agagaagagc  | attagcaggt  |
| 4081 | tacttaccct  | aggttttgat  | caaagctcga | taattattga  | tcctggtatt  | ggttttggaa  |
| 4141 | aatctctata  | tcagaatatc  | tggcttttat | gcaatataga  | agcattgcaa  | agttttggct  |
| 4201 | gcaaagttct  | ggttggccat  | tctagaaagt | catttatttc  | ttctttttct  | acagaacctg  |
| 4261 | tccttaaccg  | agatttagaa  | acaattgctt | tatcatctgc  | attgcacaac  | aaggttgatt  |
| 4321 | tccttcgagt  | gcataatgtg  | cgtgatcaca | tgcgattctt  | tgtagctcaa  | gctgctttac  |
| 4381 | agggatgata  | gttatcggaa  | ttatggctgt | tgatcccaag  | ggggtaatg   | gaataaataa  |
| 4441 | tggattgccc  | tggcattatc  | caagtgaagt | agatcatttt  | cgtcagggtga | ctgacaaaca  |
| 4501 | agttattgtt  | atgggaagaa  | aaacatttga | aactatgtct  | caaaacatat  | taaaggatcg  |
| 4561 | tatccctgtt  | gttttttctc  | gtgacaaatt | aaattcttgt  | tttaacagag  | gagtaaaatg  |
| 4621 | cactattatt  | tcttctatgc  | aagagttttt | gtcaatccaa  | agtaattcta  | aagtcttcat  |
| 4681 | gattggtgga  | gcacaaatag  | cgcactcttt | tttgaggtat  | gatctaattc  | cagaatttat  |
| 4741 | cataacagaa  | attcacaaac  | cctataaagg | tgatgtatat  | ttcaacttaa  | cacttcttga  |
| 4801 | tggatggcat  | aaaactattc  | tcaccaaacc | gaaagattat  | actatatgta  | ggctaatacg  |
| 4861 | ttaatatgca  | tgttaaagca  | atttataccc | accgcattga  | atgtggggaa  | gtattagagc  |
| 4921 | aggttcttga  | tcgctatgtt  | tcagagttgc | taggagagga  | agttgttctt  | gctatcacat  |
| 4981 | caaaaatcat  | ttctattttgt | caaaaacaag | tggtttgcaa  | aactgcttgt  | tctaaagaag  |
| 5041 | agctaataca  | aagagaagct  | gatgcaattg | ttgatgtaga  | ccataattct  | tacggcatct  |
| 5101 | atttaacaat  | caaagacaat  | atcttaattc | catctgctgg  | tattgatgaa  | tcaaatggta  |

```

5161 atgaaatgta tattttatata ccaaaaggatg ttcagaaaaac agtcttatca atatggaact
5221 atctcaagac aaaacactgc ataaaaacatc ttgggtatttt gattacagat agtaacataa
5281 cacctatgcg ccttgggggtt acggggcggtt ctcttggttg gtgtggattt gaaccatttt
5341 attcctatat aggcaagcca gatctttatg atcaaccact gcaagtaaca caagtcaatc
5401 ttcttgatgc gctggcaacg tctgctgttt tagttatggg agaaggggcg gagcaaacac
5461 caatggcaat aattagtggc gcaccaaaga ttcactttct tactcgtctg ccaactacag
5521 aagaagaaaa aagtgtgaag atatctatgg aagaggacct ttactctcct ctcctcatgc
5581 gagcccgctg gttaaagagt taaagaggaa cttaaaaatt tgctattaga cttctt

//
LOCUS          JAQZAU010000098          31806 bp      dna      linear      ENV 17-MAR-2023
DEFINITION     MAG: Wolbachia pipientis isolate wEsol contig_49146, whole genome
                shotgun sequence.
ACCESSION      JAQZAU010000098  JAQZAU010000000
VERSION        JAQZAU010000098.1
DBLINK         BioProject: PRJNA929258
                BioSample: SAMN33142973
KEYWORDS       WGS; ENV; Metagenome Assembled Genome; MAG.
SOURCE         Wolbachia pipientis (insect metagenome)
  ORGANISM     Wolbachia pipientis
                Bacteria; Pseudomonadota; Alphaproteobacteria; Rickettsiales;
                Anaplasmataceae; Wolbachieae; Wolbachia.
REFERENCE      1 (bases 1 to 31806)
  AUTHORS      Fiutek,N., Couger,B.M., Roy,S., de la Torre,J.R. and Connor,E.F.
  TITLE        Genomic assessment of the contribution of the Wolbachia
                endosymbiont of Eurosta solidaginis to gall-induction
  JOURNAL      International Journal Molecular Sciences
REFERENCE      2 (bases 1 to 31806)
  AUTHORS      Fiutek,N., Couger,B.M., Roy,S., de la Torre,J.R. and Connor,E.F.
  TITLE        Direct Submission
  JOURNAL      Submitted (10-FEB-2023) Biology, San Francisco State University,
                1600 Holloway Ave, San Francisco, CA 94132, USA
COMMENT        ##Genome-Assembly-Data-START##
                Assembly Date          :: JUN-2019
                Assembly Method        :: FLYE v. 06-2019
                Genome Representation  :: Full
                Expected Final Version :: Yes
                Genome Coverage        :: 100.0x
                Sequencing Technology  :: Illumina HiSeq; PacBio Sequel
                ##Genome-Assembly-Data-END##
FEATURES       Location/Qualifiers
  source        1..31806
                /organism="Wolbachia pipientis"
                /mol_type="genomic DNA"
                /submitter_seqid="contig_49146"
                /isolate="wEsol"
                /isolation_source="galls on Solidago altissima"
                /host="Eurosta solidaginis MN-2018-EFC"
                /db_xref="taxon:955"
                /environmental_sample
                /country="USA: Cowling Arboretum, Carleton College,
                Northfield, MN"
                /lat_lon="44.48 N 93.13 W"
                /altitude="280 m"
                /collection_date="2018-11"
                /metagenome_source="insect metagenome"
                /note="metagenomic"
  gene          <1..116
                /locus_tag="wEsol_01097"
  CDS           <1..116
                /locus_tag="wEsol 01097"

```

```

/codon_start=1
/transl_table=11
/product="hypothetical protein"
/translation="KGNAENLLIITDYPELIQQYVKNWEARMSQSYKYAPN"
/besthit="qcoverage 100 , hcoverage 47.4358974358974 ,
similarity 100 , identity 100 , evalue 2.17e-18 ,
alnlength 37 , Bacteria , Proteobacteria , EAL58067.1
endonuclease Nuc, partial [Wolbachia endosymbiont of
Drosophila ananassae]"
gene 226..768
/locus_tag="wEsol_01098"
CDS 226..768
/locus_tag="wEsol_01098"
/codon_start=1
/transl_table=11
/fullproduct="qcoverage 100 , hcoverage 100 , similarity
100 , identity 100 , evalue 1.77e-133 , alnlength 180 ,
Bacteria , Proteobacteria , WP_006279913.1 MULTISPECIES:
hypothetical protein [Wolbachia]"
/translation="MDYINDAAGSYTAIHDFQNGVGDYKVQCNYGGVPYATDEYVH
SGDKFWSNNFIDSHFGREIKMYPQSELLAKEYAGNTLPVSIISLDKDLIKMKECQKTK
FVELERESGDLVHDKQKYVKCYTTKLSYDDVHIYNNDKVSTFSIKYDVPNDPKYSLNI
TFTKVNDNKPGFWQKFKNMF"
/product="hypothetical protein"
/besthit="qcoverage 100 , hcoverage 100 , similarity 100
, identity 100 , evalue 1.77e-133 , alnlength 180 ,
Bacteria , Proteobacteria , WP_006279913.1 MULTISPECIES:
hypothetical protein [Wolbachia]"
gene complement(1107..1811)
/locus_tag="wEsol_01099"
CDS complement(1107..1811)
/locus_tag="wEsol_01099"
/codon_start=1
/transl_table=11
/fullproduct="qcoverage 100 , hcoverage 100 , similarity
100 , identity 100 , evalue 1.24e-162 , alnlength 234 ,
Bacteria , Proteobacteria , ERN56164.1 ribonuclease III
[Wolbachia pipientis wMelPop]"
/cog="Rnc COG0571 235 dsRNA-specific ribonuclease"
/pfam="Pfam-B_15661 Ribonuclease_3 Pfam-B_14618 dsrm"
/tigr="TIGR02191 RNaseIII 219 ribonuclease III"
/product="ribonuclease III"
/translation="MGMKSLNDAISKIIDYKFTNYAILEEALTHPSVNKRNSKNQIVS
YERLEFLGDSVLNMVVSATLFKLFPEEKEGALAKRKTDLVCGNTIANVAKEIKLGSFI
IMNNSERCNGGRCNLKNLENSLEALIGAIYIDGGLENVEKFIIQYWEKLAKGMLDPPQ
DPKTSLQEWQTQKNKLPLPEYELVKQTGPAHNPEFTISVCIEDYGKVSACASSKKIAEQ
KAAELMLEKIGKDASV"
/besthit="qcoverage 100 , hcoverage 100 , similarity 100
, identity 100 , evalue 1.24e-162 , alnlength 234 ,
Bacteria , Proteobacteria , ERN56164.1 ribonuclease III
[Wolbachia pipientis wMelPop]"
gene complement(1994..3070)
/locus_tag="wEsol_01100"
CDS complement(1994..3070)
/locus_tag="wEsol_01100"
/codon_start=1
/transl_table=11
/fullproduct="qcoverage 100 , hcoverage 100 , similarity
100 , identity 100 , evalue 1.10e-250 , alnlength 358 ,
Bacteria , Proteobacteria , WP_151807528.1 MULTISPECIES:

```

```

quinone-dependent dihydroorotate dehydrogenase
[Wolbachia]"
/cog="PyrD COG0167 310 Dihydroorotate dehydrogenase"
/pfam="DHO_dh Pfam-B_236 PcrB"
/tigr="TIGR01036 pyrD_sub2 356 dihydroorotate
dehydrogenase (fumarate)"
/product="quinone-dependent
dihydroorotate dehydrogenase"
/translation="MVKNKLKISKVFYKMILRDLLFLLPPEVAHSLAIMALKKIPYKN
PIELPESLSVNFNGKLRSPVGLAAGFDKNAEVIRPMLSFGFGFIETGTVTRNPQYGN
KKPRIFRLIKDQGVINRLGFNNKGIDYFLKQIDKTKLDDCIFGINIGKNSTSKDQISD
YVDLIKIVYGKSNYIVLNISSPNTPNLRNLHNKQELSELLKSVTLTRKSIDNSKSIPI
ILKISPDIDQQTKENIAELALEYKIDGLTVSNTTISRNNLHSHHNESGGLSGKPLFKL
STELLSDMYKLTKGKILLVGCGLSSGADAYKKIKAGASLVQLYTALIYHGPQVVNKI
NLELAELIRRDGFSNISEVVGCIH"
/besthit="qcoverage 100 , hcoverage 100 , similarity 100
, identity 100 , eval 1.10e-250 , alnlength 358 ,
Bacteria , Proteobacteria , WP_151807528.1 MULTISPECIES:
quinone-dependent dihydroorotate dehydrogenase
[Wolbachia]"
gene complement(3278..3922)
/locus_tag="wEsol_01101"
CDS complement(3278..3922)
/locus_tag="wEsol_01101"
/codon_start=1
/transl_table=11
/product="hypothetical protein"
/pfam="DeoC"
/tigr="TIGR01949 AroFGH_arch 255 predicted
phospho-2-dehydro-3-deoxyheptonate aldolase"
/translation="MIEAGASTYAGMLPLILKLNSSNSLHSKDLTSDQAITSSVKDAL
RLGCLAVGFTIYPGSAKCFDMMEEARGIVAEAKSYGLAVVLWSYPRGEGISKEGETAV
DVIAYAAHMAALLGANIIKVKLPTKYLEREKIETENIESLPKRIEYVKRSCFAGKRIV
IFS GGESKSVNDICNEAKEIKQGGGNGSIIGRNTFQRKREEALSMLKDIMDIYT"
/cog="FbaB COG1830 265 Dhna-type
fructose-1,6-bisphosphate aldolase and related enzymes"
/besthit="qcoverage 100 , hcoverage 71.8120805369127 ,
similarity 100 , identity 99.1 , eval 7.47e-144 ,
alnlength 214 , Bacteria , Proteobacteria ,
WP_041573616.1 MULTISPECIES: class I
fructose-bisphosphate aldolase [unclassified Wolbachia]"
gene complement(4031..4177)
/locus_tag="wEsol_01102"
CDS complement(4031..4177)
/locus_tag="wEsol_01102"
/codon_start=1
/transl_table=11
/product="hypothetical protein"
/translation="MISDKVKQVLSYYESENPGVKANLTRILMHGKLGGTGKLVILPV
DQGI"
/besthit="qcoverage 97.9166666666667 , hcoverage
15.7190635451505 , similarity 100 , identity 100 , eval
1.21e-22 , alnlength 47 , Bacteria , Proteobacteria ,
AGK00443.1 Fructose-bisphosphate aldolase [Wolbachia
endosymbiont of Drosophila simulans wHa]"
gene complement(4239..5444)
/locus_tag="wEsol_01103"
CDS complement(4239..5444)
/locus_tag="wEsol_01103"
/codon_start=1

```

```

/translation=11
/product="hypothetical protein"
/pfam="Torsin RuvB_N Sigma54_activat ResIII Pfam-B_1119
AAA_2 Pfam-B_4367 Zeta_toxin AAA AAA_5 AAA_17 AAA_3
AAA_14 AAA_18 AAA_22 ClpB_D2-small RepB-RCR_reg"
/tigr="TIGR02639 ClpA 734 ATP-dependent Clp protease
ATP-binding subunit ClpA"
/translation="MLKESSVNETIKILDGIKHYYEGYHGVYYTKNAIRSAAELSHKY
ITGRILPDKAVDVIDEAGAYCKLLNRNGKIVNSRDIKNTITRITNVPCGSESDDLQKV
KSLKANLEKVIQEQQAIESLVNSIKIAKSGLRNKNPLANYLFAGPTGVGKTELAQ
LAESMGMLIRFDMSEYIESHTISRMIGSPPGYVGYDQGGLLTESVSNNQYSVLLDE
IEKAHSDIYNILLQIMDYGCVTDITYGRKVNFSNIILIMTTNAGAAERSKSFVGFHKK
FNTGDSEKAIEQVFSPEFRNRLDAIISFSDLNADIILHIVDKFIQELKKQLTQKGINC
LVEDEVKSYLVQMGSYKEMGARPIERLIEKEIKSYLAEELNRKLIKGGKLRIMNKV
ENKIAFDIV"
/cog="clpA COG0542 786 ATP-binding subunits of Clp
protease and DnaK/DnaJ chaperones"
/besthit="qcoverage 99.7506234413965 , hcoverage
52.0833333333333 , similarity 100 , identity 99.8 ,
evaluate 2.15e-267 , alnlength 400 , Bacteria ,
Proteobacteria , WP_155969133.1 MULTISPECIES: AAA family
ATPase [Wolbachia]"
gene complement(5693..5845)
/locus_tag="wEsol_01104"
CDS complement(5693..5845)
/locus_tag="wEsol_01104"
/codon_start=1
/translation=11
/product="hypothetical protein"
/tigr="TIGR02639 ClpA 734 ATP-dependent Clp protease
ATP-binding subunit ClpA"
/translation="MLEIPGVGKTTIVEGLVLKIIESSVPSALRSSIIYALDLGITPC
RDTLQR"
/cog="clpA COG0542 786 ATP-binding subunits of Clp
protease and DnaK/DnaJ chaperones"
/besthit="qcoverage 74 , hcoverage 19.6808510638298 ,
similarity 94.6 , identity 91.9 , evaluate 9.33e-12 ,
alnlength 37 , Bacteria , Proteobacteria , AAX14405.1
ATP-dependent Clp protease, ATP-binding subunit ClpA,
partial [Wolbachia endosymbiont of Drosophila
mojavensis]"
gene complement(5805..6092)
/locus_tag="wEsol_01105"
CDS complement(5805..6092)
/locus_tag="wEsol_01105"
/codon_start=1
/translation=11
/product="hypothetical protein"
/tigr="TIGR02639 ClpA 734 ATP-dependent Clp protease
ATP-binding subunit ClpA"
/translation="MKYSDDIDEYTTNHKVKLDKNNDAPTTVNKGELLKDEEILQSYC
KNLNDYARSKKIDYVIGRDYELNRTIEILLRRRKNNPLYVGDPWCQNHNS"
/besthit="qcoverage 91.5789473684211 , hcoverage
46.2765957446808 , similarity 100 , identity 98.9 ,
evaluate 8.16e-54 , alnlength 87 , Bacteria ,
Proteobacteria , AAX14405.1 ATP-dependent Clp protease,
ATP-binding subunit ClpA, partial [Wolbachia endosymbiont
of Drosophila mojavensis]"
gene complement(6152..6550)
/locus_tag="wEsol_01106"

```

CDS complement(6152..6550)  
/locus\_tag="wEsol\_01106"  
/codon\_start=1  
/transl\_table=11  
/product="hypothetical protein"  
/pfam="Pfam-B\_16430"  
/tigr="TIGR02639 ClpA 734 ATP-dependent Clp protease  
ATP-binding subunit ClpA"  
/translation="MISKNLEASLNRLFIASNFNLKYAKVEHLLLALTKDVDVNYVL  
SRCNIRADEIISMDNILSRCNIKANDYNNNIKGFLLQSSSELIISGVKPSSMFQCIHR  
AIIRAHSLGKKEINGANVLVEILSRARLIR"  
/cog="clpA COG0542 786 ATP-binding subunits of Clp  
protease and DnaK/DnaJ chaperones"  
/besthit="qcoverage 95.4545454545455 , hcoverage  
44.0559440559441 , similarity 100 , identity 99.2 ,  
evaluate 2.16e-68 , alnlength 126 , Bacteria ,  
Proteobacteria , EAL59932.1 ATP-dependent Clp protease,  
ATP-binding subunit ClpA, partial [Wolbachia endosymbiont  
of Drosophila simulans]"

gene complement(6755..7981)  
/locus\_tag="wEsol\_01107"

CDS complement(6755..7981)  
/locus\_tag="wEsol\_01107"  
/codon\_start=1  
/transl\_table=11  
/fullproduct="qcoverage 100 , hcoverage 100 , similarity  
100 , identity 100 , evaluate 3.00e-287 , alnlength 408 ,  
Bacteria , Proteobacteria , WP\_015589458.1 DEAD/DEAH box  
helicase [Wolbachia endosymbiont of Drosophila simulans]"  
/cog="SrmB COG0513 513 Superfamily II DNA and RNA  
helicases"  
/pfam="DEAD ResIII SNF2\_N Pfam-B\_3046 DUF1253 Helicase\_C"  
/tigr="TIGR04121 DEXH\_lig\_assoc 804 DEXH box helicase,  
DNA ligase-associated"  
/product="DEAD/DEAH box helicase"  
/translation="MNNFHEMGLPASLRQALDKNNLFVPTPIQIQAIPLALQKGDILG  
SAQTGTGKTLAFAIPLVAKLLNEPNTGSALVIVPTRELAHQVTNEIRKLLSQNSALRV  
ALLIGGEPIFRQLNQLQKKPQIVIGTPGRIIDHIERKTLITRNVSVLVLETDTRMFD  
MFGFVQIEEIMKHLPKIRQTLMFSAITLPGDIVKLAKEYLNRPERISVDCEVTTSVKIKQ  
EIVYASESEKYEKLVTLQCLQREGSIIIFVKTKRGADQLANRLHKDDYSALAIHGDLRQ  
HKRERVINSFRRGRNQIMVATDVASRGLDIPHIQHVINYDAPQSQADYIHRIGRTARA  
GAEGYALS FVTPQDKRRLPV LADKEGELNFDCSVQFKKRNSKKVFKRPSTLTKYGRK  
KINAFKKKSRVLEKAY"  
/besthit="qcoverage 100 , hcoverage 100 , similarity 100  
, identity 100 , evaluate 3.00e-287 , alnlength 408 ,  
Bacteria , Proteobacteria , WP\_015589458.1 DEAD/DEAH box  
helicase [Wolbachia endosymbiont of Drosophila simulans]"

gene complement(8017..8268)  
/locus\_tag="wEsol\_01108"

CDS complement(8017..8268)  
/locus\_tag="wEsol\_01108"  
/codon\_start=1  
/transl\_table=11  
/fullproduct="qcoverage 100 , hcoverage 100 , similarity  
100 , identity 100 , evaluate 8.36e-52 , alnlength 83 ,  
Bacteria , Proteobacteria , WP\_006279919.1 MULTISPECIES:  
cold shock domain-containing protein [Wolbachia]"  
/cog="CspC COG1278 67 Cold shock proteins"  
/pfam="CSD OB\_RNB"  
/tigr="TIGR02381 cspD 68 cold shock domain protein CspD"

```

/product="cold shock
domain-containing protein"
/translation="MEFGNVKWFNAEKGYGFIKPEGKGGDVVFVHISTLERSGIRPEAL
KGENKEKGIKGERVSYEVKEERGRNGEDKKSAINLRLED"
/besthit="qcoverage 100 , hcoverage 100 , similarity 100
, identity 100 , evalue 8.36e-52 , alnlength 83 ,
Bacteria , Proteobacteria , WP_006279919.1 MULTISPECIES:
cold shock domain-containing protein [Wolbachia]"
gene complement(8443..9777)
/locus_tag="wEsol_01109"
CDS complement(8443..9777)
/locus_tag="wEsol_01109"
/codon_start=1
/transl_table=11
/fullproduct="qcoverage 100 , hcoverage 100 , similarity
100 , identity 100 , evalue 2.11e-303 , alnlength 444 ,
Bacteria , Proteobacteria , WP_010081974.1 MULTISPECIES:
TldD/PmbA family protein [Wolbachia]"
/cog="TldD COG0312 454 Predicted Zn-dependent proteases
and their inactivated homologs"
/pfam="PmbA_TldD"
/product="TldD/PmbA family
protein"
/translation="MNILNIAADITKLIKQNDQAEVTIYETNKTSVSQRLSKIEQIS
QSKNCTVGIRAIAGKNKAAYISTNDLNNLSDTVSVQVEMAKNAPEDPCINFAVNGSNY
ISSADLSISDNNVTVVDNLKEIAEAAENSALAHKSITNSEGASSSYALVNTVLSTVSG
FIGSFSKSTFANQVSUVAGRESEMKVGYDYDIACNFSDLKLPGLMGKEAAKRAVDQLN
SRTMKTGKFPVIFEKRAAKGLVKSFAAINGSSIISSNSFLRGLNAQIFNDRINIID
DPLLPRGIASRPFDGEGITSKKNIFVKNGILQNWILDLYSARKLDSETTGSATRASNA
AVIPAASNLYIENGDVSEELIQEVKEGIYVTDLFGFGVNLINGDYSQGASGFFIENG
KITYPEIHEITIASNLKDMFSNLVVADDLTFCGQFNSPTIKVSEMTVAGSLND"
/besthit="qcoverage 100 , hcoverage 100 , similarity 100
, identity 100 , evalue 2.11e-303 , alnlength 444 ,
Bacteria , Proteobacteria , WP_010081974.1 MULTISPECIES:
TldD/PmbA family protein [Wolbachia]"
gene complement(9796..10668)
/locus_tag="wEsol_01110"
CDS complement(9796..10668)
/locus_tag="wEsol_01110"
/codon_start=1
/transl_table=11
/fullproduct="qcoverage 100 , hcoverage 100 , similarity
100 , identity 100 , evalue 5.21e-192 , alnlength 290 ,
Bacteria , Proteobacteria , WP_010081973.1 MULTISPECIES:
F0F1 ATP synthase subunit gamma [Wolbachia]"
/cog="AtpG COG0224 287 F0F1-type ATP synthase, gamma
subunit"
/pfam="ATP-synt"
/tigr="TIGR01146 ATPsyn_Flgamma 286 ATP synthase F1,
gamma subunit"
/product="F0F1 ATP synthase
subunit gamma"
/translation="MKSLKELSLRIKNIRSVQKTTKIMQMVSAAKLLQSQKLLNSKL
YVSKLHNIIFSLMLSVDQELLAKILNVSNDGSLVFIASDRGLCGNFNSSIVKFSQE
RVNKSANGKKVDIVFLGKKAFFDVGKNRFDSSILKIENSKGITLKHVEALVDGIDLS
KYDKVKVFYSKFYNTFTQKPMLETIKPWSKDSSLIDSSLAGPTTDYGYEYEPQNIIFI
LKSLVQDYVVIALYSALLESATSSENSARMVAMESANRNTKEILNKLALLYNRSRQAAI
TTDLIEVIGGAESL"
/besthit="qcoverage 100 , hcoverage 100 , similarity 100
, identity 100 , evalue 5.21e-192 , alnlength 290 ,

```

```

Bacteria , Proteobacteria , WP_010081973.1 MULTISPECIES:
F0F1 ATP synthase subunit gamma [Wolbachia]"
gene complement(10867..12087)
/locus_tag="wEsol_01111"
CDS complement(10867..12087)
/locus_tag="wEsol_01111"
/codon_start=1
/transl_table=11
/pfam="HemY_N TPR_11 Apc3 TPR_12 TPR_11 TPR_1 Pfam-B_121"
/fullproduct="qcoverage 100 , hcoverage 100 , similarity
100 , identity 100 , evalue 6.57e-290 , alnlength 406 ,
Bacteria , Proteobacteria , WP_007548692.1 MULTISPECIES:
hypothetical protein [Wolbachia]"
/translation="MIYFIIFAFSFLFGIWVKVSGEVIKLELGNYTISIDLYFIIFTC
VLLFLLLITLVRFFSSISSTFANIRNRDRDREELLLFEAFFSIDLDNIENAQKLVKSL
SEESDRLSLIKLFNSGKTGNYSFFSNGLTNIANKNRNLALLLANKLIVHLKQEKVVVFQ
KFIEYCSSSINDKMLSIPFQIEHCILKEDWINAILRLKEAVKSNIFLPFDHKEMFAVF
YCALAQYESKGNFKEAIKSLFRAQRYSAIFQPINYLKAELYIKLGKIRKASAVLEAE
YTVNPTPQSAKMYINLNSKGAERLYNLRPDYFYSYCLLALSSMSGKYDLASQYLDTA
MKKANYMSIYFIVIQLKVTLQEHDKVIYWLNMKGSEALPDPGWKCKNCNRELEQWDHK
CSSCNSFNCVYYIL"
/product="hypothetical protein"
/besthit="qcoverage 100 , hcoverage 100 , similarity 100
, identity 100 , evalue 6.57e-290 , alnlength 406 ,
Bacteria , Proteobacteria , WP_007548692.1 MULTISPECIES:
hypothetical protein [Wolbachia]"
gene complement(12084..12815)
/locus_tag="wEsol_01112"
CDS complement(12084..12815)
/locus_tag="wEsol_01112"
/codon_start=1
/transl_table=11
/fullproduct="qcoverage 100 , hcoverage 100 , similarity
100 , identity 100 , evalue 9.38e-167 , alnlength 243 ,
Bacteria , Proteobacteria , WP_015589456.1 MULTISPECIES:
hypothetical protein [unclassified Wolbachia]"
/translation="MNDTQQKYIGWFLIVLLFTGYITINNIIFLKINQQESENNVKAL
TENMDEFRMLLEVNSRIEKKIFDLKRSQHTQCEQGDNNRCKNLAKLLLLLVVKMKN
LLREAKFDNHINSIKPLISELDDPEIENAVDELENLKEINTLHELKLSFEKTIDTIDY
NKSTLSKKIISNWIKVDDRNDPLRVKFAEIEESINDNDWQNITVTVSNLTHSEFKPWL
NKLNGFIVASKNISTIIYHRLQYIS"
/product="hypothetical protein"
/besthit="qcoverage 100 , hcoverage 100 , similarity 100
, identity 100 , evalue 9.38e-167 , alnlength 243 ,
Bacteria , Proteobacteria , WP_015589456.1 MULTISPECIES:
hypothetical protein [unclassified Wolbachia]"
gene complement(12808..13566)
/locus_tag="wEsol_01113"
CDS complement(12808..13566)
/locus_tag="wEsol_01113"
/codon_start=1
/transl_table=11
/product="hypothetical protein"
/pfam="MacB_PCD ABC2_membrane_3 FtsX"
/tigr="TIGR02212 lolCE 411 lipoprotein releasing system,
transmembrane protein, LolC/E family"
/translation="MATKLRLYHLKNFDALLGEMPRMKKYKVIAIFDMGMFEYDNTLI
YMPLKSAQAFFNYKNSIKNIEVLVDDVTRADKLADAIEKEIGMEAESWQSQQSHYFSA
LKTERNVMFLILTLLIIVVAAFNIISNLMMIVQEKKSAIAIMRTFGATSGSIMRIFCAC
GLLIGFTGTCLGCIIGVVFSNLNIESIRVFLENITNVKLFDPMIYFFSSLPVILVPQDV

```

VNISALALLLSFLATIAPALQAAAQDPAEILRYE"  
 /cog="LolE COG4591 408 ABC-type transport system,  
 involved in lipoprotein release, permease component"  
 /besthit="qcoverage 96.031746031746 , hcoverage  
 66.4835164835165 , similarity 99.6 , identity 99.2 ,  
 evaluate 6.74e-154 , alnlength 242 , Bacteria ,  
 Proteobacteria , EAL60037.1 ABC transporter, permease  
 protein [Wolbachia endosymbiont of Drosophila simulans]"  
 gene complement(13569..14039)  
 /locus\_tag="wEsol\_01114"  
 CDS complement(13569..14039)  
 /locus\_tag="wEsol\_01114"  
 /codon\_start=1  
 /transl\_table=11  
 /product="hypothetical protein"  
 /pfam="Pfam-B\_19996 MacB\_PCD"  
 /tigr="TIGR02212 lolCE 411 lipoprotein releasing system,  
 transmembrane protein, LolC/E family"  
 /translation="MSIAFEITMAACYLRAKNARFCSIMTLFSIIGIALGVATLIVVM  
 SVMNGFRAKLLDSILGIDGHINVYFDRNINSDDYAVSKSIERIPGILKATPMTNDQVI  
 IVANGKIAGSVVRGVSTKDLLDSTAVTNNVIIGDVKKFDEGNNNRSTLSRSFER"  
 /cog="LolE COG4591 408 ABC-type transport system,  
 involved in lipoprotein release, permease component"  
 /besthit="qcoverage 91.6666666666667 , hcoverage  
 53.3582089552239 , similarity 100 , identity 99.3 ,  
 evaluate 1.71e-87 , alnlength 143 , Eukaryota , Arthropoda  
 , GFQ84694.1 lipoprotein-releasing ABC transporter  
 permease subunit [Trichonephila clavata]"  
 gene complement(14106..14195)  
 /locus\_tag="wEsol\_01115"  
 CDS complement(14106..14195)  
 /locus\_tag="wEsol\_01115"  
 /codon\_start=1  
 /transl\_table=11  
 /product="hypothetical protein"  
 /translation="MMYMEDFEILMLKILYKPAKFKEAKISSF"  
 /besthit="qcoverage 96.551724137931 , hcoverage  
 66.6666666666667 , similarity 100 , identity 100 , evaluate  
 1.85e-09 , alnlength 28 , Bacteria , Proteobacteria ,  
 QEF50864.1 hypothetical protein EA652\_1196 [Wolbachia  
 endosymbiont of Drosophila ananassae]"  
 gene complement(14173..15462)  
 /locus\_tag="wEsol\_01116"  
 CDS complement(14173..15462)  
 /locus\_tag="wEsol\_01116"  
 /codon\_start=1  
 /transl\_table=11  
 /pfam="NTP\_transferase NTP\_transf\_3 MannoseP\_isomer  
 Cupin\_2 AraC\_binding"  
 /fullproduct="qcoverage 100 , hcoverage 100 , similarity  
 99.8 , identity 99.8 , evaluate 1.32e-314 , alnlength 429 ,  
 Bacteria , Proteobacteria , WP\_015589455.1 MULTISPECIES:  
 cupin domain-containing protein [unclassified Wolbachia]"  
 /translation="MRPVILCGSGSRLWPLSKPKQFQKIFSQNTMFHNTLLRLKSDY  
 MPPIIATNIQYESLVMEELHALQEYKVIFEPVKIGTTAAILIAALLCNENETMLILPS  
 DHFIGDLNSFYASTQKASKLASETNSIVTFGVKPEFNSEYGYINAVYDQKEKCHIVK  
 DFTEKPEHKLSNDHYWNSGIFVFKAKRYIDEIKKSAPNLYNLCFKYFTQPQERFLYLKQ  
 RDFAGIEGISIDYLVMEKAKNVAMIEANFDWLDVGTWNSVLELSEKFSKEPVSFQHVI  
 REKEPVSTTKSNKNLLGGACKQPNKSLISFIHKVKKVKVIRKEVKPWGFCSIILMSEN  
 FLIKYLFINPLSCTSKQFHHRDEYHIVLSGVGYVSLEDKEYAIAKDHMIEIPREVSH

```

RIENRSISSPLEIVEFQIGEHLSNDNDIVRLDDVYGRF"
/product="cupin
domain-containing protein"
/besthit="qcoverage 100 , hcoverage 100 , similarity 99.8
, identity 99.8 , evalue 1.32e-314 , alnlength 429 ,
Bacteria , Proteobacteria , WP_015589455.1 MULTISPECIES:
cupin domain-containing protein [unclassified Wolbachia]"
gene complement(15575..16813)
/locus_tag="wEsol_01117"
CDS complement(15575..16813)
/locus_tag="wEsol_01117"
/codon_start=1
/transl_table=11
/fullproduct="qcoverage 100 , hcoverage 100 , similarity
100 , identity 100 , evalue 3.42e-295 , alnlength 412 ,
Bacteria , Proteobacteria , WP_141456696.1 MULTISPECIES:
hypothetical protein [unclassified Wolbachia]"
/translation="MFEALKKGAIIDLTLKAKGLLTSPESQVYVEDLRKVMYDGRKCQ
YPKNYDQIVQSAKIIENRDMHGNAILDKDKNPTYKLLYGQKDENRKQPSFRLSLVPKN
EDNDRSYFTINYIDNQGKQIPIDWLNKSIFYEPLGFSRMDLKKHAPIFEAQTKNPQYP
FELTNSSVLTKEVKNKEGKVQEVVDEKGRNGELLYTSDDKKLSTHFSEIRDQNGNLEL
DKSLISVPIVFATSLAKVCTKLLTSLPIKLGKYLISEQNPIAKSFGYLLFTPAMAIKN
LVNMGATILKAPILLFVANEEKKYGDAYYTMWKHQLKGCLEEAKSDFNVIKGEERLKP
HGNRDSLVTWDELNARRPKKQGDDKEVSKSNEILKSPEEEQNKGNEILSDKRKGHVE
ELQNRNRSQQGQGATHDHS"
/product="hypothetical protein"
/besthit="qcoverage 100 , hcoverage 100 , similarity 100
, identity 100 , evalue 3.42e-295 , alnlength 412 ,
Bacteria , Proteobacteria , WP_141456696.1 MULTISPECIES:
hypothetical protein [unclassified Wolbachia]"
gene complement(17251..17628)
/locus_tag="wEsol_01118"
CDS complement(17251..17628)
/locus_tag="wEsol_01118"
/codon_start=1
/transl_table=11
/fullproduct="qcoverage 100 , hcoverage 100 , similarity
100 , identity 100 , evalue 1.71e-75 , alnlength 125 ,
Bacteria , Proteobacteria , WP_007548462.1 MULTISPECIES:
succinate dehydrogenase, cytochrome b556 subunit
[Wolbachia]"
/cog="SdhC COG2009 132 Succinate dehydrogenase/fumarate
reductase, cytochrome b subunit"
/pfam="Sdh_cyt"
/tigr="TIGR02970 succ_dehyd_cytB 120 succinate
dehydrogenase, cytochrome b556 subunit"
/product="succinate
dehydrogenase, cytochrome b556 subunit"
/translation="MSDRPLSPHLQIYKVQVTSFFSIMHRLTGILLFLLLMILSWYFI
LHVYFPELLIVRYLNALLFTPVAKLAYVLCFISFVYHFLNGIRHLLWDAGLNLEITGV
SRSAILLTVTLLLSTMAFLFMFI"
/besthit="qcoverage 100 , hcoverage 100 , similarity 100
, identity 100 , evalue 1.71e-75 , alnlength 125 ,
Bacteria , Proteobacteria , WP_007548462.1 MULTISPECIES:
succinate dehydrogenase, cytochrome b556 subunit
[Wolbachia]"
gene complement(18672..18794)
/locus_tag="wEsol_01119"
CDS complement(18672..18794)
/locus_tag="wEsol_01119"

```

```

/codon_start=1
/transl_table=11
/fullproduct="qcoverage 100 , hcoverage 100 , similarity
100 , identity 100 , evalue 1.36e-16 , alnlength 40 ,
Bacteria , Proteobacteria , CDR79574.1 hypothetical
protein WPAU_1221 [Wolbachia endosymbiont of Drosophila
simulans wAu]"
/translation="MTVLTEEVLANSVPAAAVIRRGALFGIIGRKGRVGGGLVS"
/product="hypothetical protein"
/besthit="qcoverage 100 , hcoverage 100 , similarity 100
, identity 100 , evalue 1.36e-16 , alnlength 40 ,
Bacteria , Proteobacteria , CDR79574.1 hypothetical
protein WPAU_1221 [Wolbachia endosymbiont of Drosophila
simulans wAu]"
gene 19453..20001
/locus_tag="wEsol_01120"
CDS 19453..20001
/locus_tag="wEsol_01120"
/codon_start=1
/transl_table=11
/fullproduct="qcoverage 100 , hcoverage 89.2156862745098
, similarity 100 , identity 100 , evalue 9.01e-124 ,
alnlength 182 , Bacteria , Proteobacteria ,
WP_015589452.1 MULTISPECIES: hypothetical protein
[unclassified Wolbachia]"
/translation="MKKYIFLLALAPMLVGITLYLLRNIDNTKQSITAGDKFYEVFLF
KKDNKPLLEEIDSNWEYLANFERAFNHISDSMPDTTASIYNDLADDDKAPNVLRELAQ
YLEVMSLLHSNGEKINKDKIDNLESSAVYPYSSQEAIADVVKIHNNDVKGATEILRSL
NDRKCPILIKANAQELLRIYGS"
/product="hypothetical protein"
/cog="COG4649 COG4649 221 Uncharacterized protein
conserved in bacteria"
/besthit="qcoverage 100 , hcoverage 89.2156862745098 ,
similarity 100 , identity 100 , evalue 9.01e-124 ,
alnlength 182 , Bacteria , Proteobacteria ,
WP_015589452.1 MULTISPECIES: hypothetical protein
[unclassified Wolbachia]"
gene complement(20406..20747)
/locus_tag="wEsol_01121"
CDS complement(20406..20747)
/locus_tag="wEsol_01121"
/codon_start=1
/transl_table=11
/fullproduct="qcoverage 100 , hcoverage 100 , similarity
100 , identity 100 , evalue 1.53e-79 , alnlength 113 ,
Bacteria , Proteobacteria , AAS13810.1 transposase, IS5
family, OrfB [Wolbachia endosymbiont of Drosophila
melanogaster]"
/cog="COG3293 COG3293 124 Transposase and inactivated
derivatives"
/pfam="DDE_Tnp_1_2 DDE_Tnp_1"
/product="transposase, IS5 family, OrfB"
/translation="MRTKYTKVKKMWADMGYQGRNLKNHIKEEYDIDIEIVKRPPCRF
WVHKDTPPELLPTREQGFKVQPRRWVVERTFAWVNRNRRLSKEYDLLTTSTENFIYLA
MSRVMLKREYA"
/besthit="qcoverage 100 , hcoverage 100 , similarity 100
, identity 100 , evalue 1.53e-79 , alnlength 113 ,
Bacteria , Proteobacteria , AAS13810.1 transposase, IS5
family, OrfB [Wolbachia endosymbiont of Drosophila
melanogaster]"

```

```

gene      complement(20858..21238)
          /locus_tag="wEsol_01122"
CDS       complement(20858..21238)
          /locus_tag="wEsol_01122"
          /codon_start=1
          /transl_table=11
          /fullproduct="qcoverage 100 , hcoverage 100 , similarity
99.2 , identity 99.2 , evalue 3.88e-86 , alnlength 126 ,
Bacteria , Proteobacteria , AOV87106.1 transposase
[Wolbachia endosymbiont of Drosophila incompta]"
          /cog="COG3293 COG3293 124 Transposase and inactivated
derivatives"
          /pfam="DUF4096"
          /product="transposase"
          /translation="MRKKYPTDLSEREWARIEKHFRVSYKKGGRRPPKYSKREILEAIF
CVLRTGCQWRYLPNDFPLWKTVYEQFRQWKKQGIFEKMNYEITKYSRRKIGRNEQPSA
CIVDSQSVKTTEKGGSKAMMEVKK"
          /besthit="qcoverage 100 , hcoverage 100 , similarity 99.2
, identity 99.2 , evalue 3.88e-86 , alnlength 126 ,
Bacteria , Proteobacteria , AOV87106.1 transposase
[Wolbachia endosymbiont of Drosophila incompta]"
gene      complement(21280..21435)
          /locus_tag="wEsol_01123"
CDS       complement(21280..21435)
          /locus_tag="wEsol_01123"
          /codon_start=1
          /transl_table=11
          /product="hypothetical protein"
          /pfam="DDE_3"
          /translation="MTFKGGCDKEVFNTWLEKMLLPKLPHGTTIVMDNATFHKTPTK
ELEVVVRK"
          /besthit="qcoverage 90.1960784313726 , hcoverage
44.6601941747573 , similarity 100 , identity 100 , evalue
4.03e-27 , alnlength 46 , Bacteria , Proteobacteria ,
WP_155968470.1 transposase [Wolbachia pipientis]"
gene      complement(21635..21982)
          /locus_tag="wEsol_01124"
CDS       complement(21635..21982)
          /locus_tag="wEsol_01124"
          /codon_start=1
          /transl_table=11
          /fullproduct="qcoverage 100 , hcoverage 100 , similarity
100 , identity 100 , evalue 2.74e-74 , alnlength 115 ,
Bacteria;Eukaryota , Proteobacteria;Arthropoda ,
WP_155968342.1 MULTISPECIES: IS630 transposase-related
protein [Wolbachia]"
          /cog="COG3415 COG3415 138 Transposase and inactivated
derivatives"
          /pfam="HTH_Tnp_IS630 HTH_Tnp_1 HTH_23 HTH_28 HTH_29 HTH_7
CENP-B_N Pfam-B_14738 HTH_8 HTH_17 HTH_24 Pfam-B_2106"
          /product="IS630
transposase-related protein"
          /translation="MAYSVDLRERAVSMIEKGKSKVEVAELLEIGIATLYRWLRKKAA
GESLRPSKNGSFIRKIDPKILEEYVKKNPDHTLAEMKQNLGFGINSIWYRLKQLRITL
KKSYSISRASRR"
          /besthit="qcoverage 100 , hcoverage 100 , similarity 100
, identity 100 , evalue 2.74e-74 , alnlength 115 ,
Bacteria;Eukaryota , Proteobacteria;Arthropoda ,
WP_155968342.1 MULTISPECIES: IS630 transposase-related
protein [Wolbachia]"

```

```

gene      22021..22359
          /locus_tag="wEsol_01125"
CDS       22021..22359
          /locus_tag="wEsol_01125"
          /codon_start=1
          /transl_table=11
          /product="hypothetical protein"
          /pfam="Ank Ank_2 Ank_4 Ank_5 Pfam-B_10896 Pfam-B_1714 Ank
Ank_4 Ank_3 Ank_2 Ank_5 Ank Ank_3 Ank_4"
          /translation="MGSTIVKDLLDNGADVNAVVGQDKKTPHWAHAHGRKDAVDALLK
VKGIDVNAKDQGGKTPHFHFAESGYQQVVQALLDKGADVNIKDKNEKTPLNLAKAEEL
KTLNQNAEKN"
          /cog="Arp COG0666 235 FOG: Ankyrin repeat"
          /besthit="qcoverage 99.1071428571429 , hcoverage
58.1151832460733 , similarity 99.1 , identity 99.1 ,
evaluate 2.22e-29 , alnlength 111 , Bacteria ,
Proteobacteria , WP_213863572.1 ankyrin repeat
domain-containing protein [Wolbachia endosymbiont of
Ceratitis capitata]"
gene      22376..24106
          /locus_tag="wEsol_01126"
CDS       22376..24106
          /locus_tag="wEsol_01126"
          /codon_start=1
          /transl_table=11
          /pfam="Ank_4 Ank Ank_2 Ank_5 Ank_3 Ank Ank_4 Pfam-B_10896
Ank Ank_3 Ank_2 Ank_4 Ank_5 Ank Pfam-B_10896 Ank_4 Ank_2
Ank_5 Ank Ank_3 Ank_4 Ank_5 Ank Ank_4 Ank Ank_2 Ank_5
Pfam-B_10896 Ank Ank_3 Ank_4 Ank Ank_3 Ank_2 Ank_5 Ank_4"
          /fullproduct="qcoverage 100 , hcoverage 82.9971181556196
, similarity 100 , identity 99.8 , evaluate 9.67e-212 ,
alnlength 576 , Bacteria , Proteobacteria ,
WP_155968555.1 ankyrin repeat domain-containing protein
[Wolbachia pipientis]"
          /translation="MQDDEEESQVPQNAALFEAVKKGEIDKVKSLISEGADVNALDGN
RFTPLRHAIVKGDKDMVSLFIDNKADVNAQSENGRALLHVAVDKANKTQPLDTSIIIEA
LLEAKGINVNIADKNGRTALHEAAKTDDQQIVTVLLEAKGIYVIPLDNTSSTPLNLAS
QQGGKHIVKILEETQKDIEALYSAVKSNDYKEVQSLLSKKVNVNSIDSNGKTPLHEAT
ASGHKEIVDALIKAGADVNIADKNGMVPLFKAAFYGHKDATEVLLNSGAKVDVTMESL
LQSMMEYNYNSSHKDVKALLNKGANADAVIDSYGHTLLHWAAREGYTDIAELLFKKGA
NVNIQDNDLWTPPLHFATKNKVFMGYADRPANASAETVKFLIKKGADVNIENEDGNTPF
KLATDEGIKTLLQPAEKSDDGSAAGSSTDSEGGQEEEEKRVGDDTELQSDNSKEGEKTS
TTSAEQGTGVSNGSQPTGSTQNKGGQTSTTSAEQGTDVQDNDVGPVASTEPAQTEEQP
SSFFGSLFSILMKPFSLIASFFGGFFSWLFGSDEEKSDTQPYDDSSSPGVDQSVEQNN
GDHNDQSNVI"
          /product="ankyrin repeat domain-containing
protein"
          /besthit="qcoverage 100 , hcoverage 82.9971181556196 ,
similarity 100 , identity 99.8 , evaluate 9.67e-212 ,
alnlength 576 , Bacteria , Proteobacteria ,
WP_155968555.1 ankyrin repeat domain-containing protein
[Wolbachia pipientis]"
gene      complement(24278..26266)
          /locus_tag="wEsol_01127"
CDS       complement(24278..26266)
          /locus_tag="wEsol_01127"
          /codon_start=1
          /transl_table=11
          /fullproduct="qcoverage 100 , hcoverage 100 , similarity
100 , identity 100 , evaluate 0.0 , alnlength 662 ,

```

```

Bacteria , Proteobacteria , WP_015589077.1 MULTISPECIES:
transketolase [unclassified Wolbachia]"
/cog="TktA COG0021 663 Transketolase"
/pfam="DXP_synthase_N Transketolase_N TPP_enzyme_C E1_dh
Transket_pyr Transketolase_C"
/tigr="TIGR00232 tktlase_bact 654 transketolase"
/product="transketolase"
/translation="MNHSHLESMAAIRFLSIDAVQKANS GHPGMPLGMADVATVLF
A KYLNHNPD DSKWFNRDRFVLSNGHGSM LLYSILYLTGYISIDELKNFRQMGSKTPGHP
EFGLTSGVEATTGPLGQGFAAAVGMALAESILEKQFRINHYTYVMLGDGCLMEGISHE
AASLAGHLKLNKLIALFDDNDISIDGATCLSCSD DVEKRFLAYGWNVDKIDGHDFDAI
SFAIEQAKKSDKPTMICCKTIIGKFSSRAGTSSAHSGAFSEEDIKQMKREKLNWNYEPF
HVPEDVKNAWKKTVERAKQNYNSLSFQC VTLESREKNEELKRRLDKRLPDNIAGVLAD
LKKQICELMPNEATRSSFGRVMELLTQHMP ELIGGSADLTGSNCTKYKHMQVINSNNY
SGSYVHYGVREHAMAACMNGMALHGAILPYGGTFLVFS DYCRPAIRLSALMKQQVMYV
MTHDSIGVGEDGPTHQPIEHLASLRAIPNLYVFRPADAVETLECVSIALEKKESPALF
ALSRQNVSYMRKFYSDIDQSANLSKFGAYILCECSKELKV TIFATGSEVEIAVETREK
LQEKGIGTRIVSMPCWRLFDEQSD EYKAAILNND SIKVAIEAGSEM GWHKYIGSNGIF
IGMKSFGESAPYKTLYEHFNINADHVVKCVCEKLVYIQ"
/besthit="qcoverage 100 , hcoverage 100 , similarity 100
, identity 100 , eval ue 0.0 , alnlength 662 , Bacteria ,
Proteobacteria , WP_015589077.1 MULTISPECIES:
transketolase [unclassified Wolbachia]"
gene 26380..26994
/locus_tag="wEsol_01128"
CDS 26380..26994
/locus_tag="wEsol_01128"
/codon_start=1
/transl_table=11
/fullproduct="qcoverage 100 , hcoverage 100 , similarity
100 , identity 100 , eval ue 2.63e-140 , alnlength 204 ,
Bacteria;Eukaryota , Proteobacteria;Arthropoda ,
WP_010962555.1 MULTISPECIES: 30S ribosomal protein S4
[Wolbachia]"
/cog="RpsD COG0522 205 Ribosomal protein S4 and related
proteins"
/pfam="Ribosomal_S4 S4 S4_2"
/tigr="TIGR01017 rpsD_bact 200 ribosomal protein S4"
/product="30S ribosomal
protein S4"
/translation="MTTVITRKYRISRRLGVNLWGRAKDPVNKRKYPPGQH GILGFKK
LSDFGKQFAAHKKFKFYAIAISSKQLRRTFLDAYNRKGYTADNFIGILESRLSSVLYHS
GLVPTIYSAKQLISHKHVTVNDKVVNIS SYRVKPGDIIKIRERAAKIPVVVEAEQKQE
RKAPDYLEADSKEHSVKYLRSPQYSEVPYSADMEVNLVVEFYSR"
/besthit="qcoverage 100 , hcoverage 100 , similarity 100
, identity 100 , eval ue 2.63e-140 , alnlength 204 ,
Bacteria;Eukaryota , Proteobacteria;Arthropoda ,
WP_010962555.1 MULTISPECIES: 30S ribosomal protein S4
[Wolbachia]"
gene 27121..27321
/locus_tag="wEsol_01129"
CDS 27121..27321
/locus_tag="wEsol_01129"
/codon_start=1
/transl_table=11
/fullproduct="qcoverage 100 , hcoverage 100 , similarity
100 , identity 100 , eval ue 3.24e-37 , alnlength 66 ,
Bacteria , Proteobacteria , WP_007552114.1 MULTISPECIES:
Fe-S cluster assembly protein IscX [Wolbachia]"
/cog="COG2975 COG2975 64 Uncharacterized protein

```

```

conserved in bacteria"
/pfam="Fe-S_assembly_TyeA"
/tigr="TIGR03412 iscX_yfhJ 63 FeS assembly protein IscX"
/product="Fe-S cluster
assembly protein IscX"
/translation="MKWLDIEDIVEALEEEKFPNENIISIRFTELKKKVLSEEFDDDE
KRCNEKILEAIQAAWIEERLTA"
/besthit="qcoverage 100 , hcoverage 100 , similarity 100
, identity 100 , evalue 3.24e-37 , alnlength 66 ,
Bacteria , Proteobacteria , WP_007552114.1 MULTISPECIES:
Fe-S cluster assembly protein IscX [Wolbachia]"
gene 27769..28110
/locus_tag="wEsol_01130"
CDS 27769..28110
/locus_tag="wEsol_01130"
/codon_start=1
/transl_table=11
/fullproduct="qcoverage 100 , hcoverage 100 , similarity
100 , identity 100 , evalue 1.87e-71 , alnlength 113 ,
Bacteria , Proteobacteria , WP_010082513.1 MULTISPECIES:
DUF721 domain-containing protein [Wolbachia]"
/cog="COG5389 COG5389 181 Uncharacterized protein
conserved in bacteria"
/pfam="DUF721 Pfam-B_13006"
/product="DUF721
domain-containing protein"
/translation="MLKRSGPKKLKSIIENYALKCMKNKISKNEIRLILNWRNIVGKE
IAECTKPKKISYAQNINSGVLHLVVTNGSKALEIQHMISLIIEKITIFFGYKAVYGIK
IKQESIDYLTIT"
/besthit="qcoverage 100 , hcoverage 100 , similarity 100
, identity 100 , evalue 1.87e-71 , alnlength 113 ,
Bacteria , Proteobacteria , WP_010082513.1 MULTISPECIES:
DUF721 domain-containing protein [Wolbachia]"
gene 28148..28462
/locus_tag="wEsol_01131"
CDS 28148..28462
/locus_tag="wEsol_01131"
/codon_start=1
/transl_table=11
/fullproduct="qcoverage 100 , hcoverage 100 , similarity
100 , identity 100 , evalue 9.32e-61 , alnlength 104 ,
Bacteria , Proteobacteria , WP_006279619.1 MULTISPECIES:
50S ribosomal protein L28 [Wolbachia]"
/cog="RpmB COG0227 77 Ribosomal protein L28"
/pfam="Ribosomal_L28"
/product="50S ribosomal
protein L28"
/translation="MSRVCEL TNRKKSFGNKVSHSNRKT KRTFLLNLHKVTLTSDILN
KKFRFRVATRTLRTIDYKGDLD A FLNTRTIKLSEKAQKIKRRLKKVLVKQ EVELAVS
DA"
/besthit="qcoverage 100 , hcoverage 100 , similarity 100
, identity 100 , evalue 9.32e-61 , alnlength 104 ,
Bacteria , Proteobacteria , WP_006279619.1 MULTISPECIES:
50S ribosomal protein L28 [Wolbachia]"
gene 28455..29318
/locus_tag="wEsol_01132"
CDS 28455..29318
/locus_tag="wEsol_01132"
/codon_start=1
/transl_table=11

```

```

/fullproduct="qcoverage 100 , hcoverage 100 , similarity
99.7 , identity 99.7 , evalule 1.04e-210 , alnlength 287 ,
Bacteria , Proteobacteria , WP_015589076.1 MULTISPECIES:
lipoyl synthase [unclassified Wolbachia]"
/cog="LipA COG0320 306 Lipoate synthase"
/pfam="Radical_SAM"
/tigr="TIGR00510 lipA 302 lipoyl synthase"
/product="lipoyl synthase"
/translation="MHSKPQWLRKAPTGEVFNETLNIVKLHNLHTVCEEAAACPNIGE
CWNKRHATVMILGSVCTRACAFCNVATGIPDKLDPHEPENLAKAIKKLNLKHVVITSV
DRDDLDPDGGANQFIQCIIEIRKITSETTIEILTPDFLNKKGAFAEIAVASPDVYNHNI
ETVPRLYAKIRPRTRYFHSLLYLLKMKVQINSKVFTKSGLMVGLGETKEEILQVMDDLR
SAEVDFFITIGQYLQPTPKHAKLDRYVTPEEFEHYKYIAYSKGFLVVASSPLTRSSYHA
EEDFNRLKACR"
/besthit="qcoverage 100 , hcoverage 100 , similarity 99.7
, identity 99.7 , evalule 1.04e-210 , alnlength 287 ,
Bacteria , Proteobacteria , WP_015589076.1 MULTISPECIES:
lipoyl synthase [unclassified Wolbachia]"
gene 29372..30088
/locus_tag="wEsol_01133"
CDS 29372..30088
/locus_tag="wEsol_01133"
/codon_start=1
/transl_table=11
/fullproduct="qcoverage 100 , hcoverage 100 , similarity
100 , identity 100 , evalule 4.01e-170 , alnlength 238 ,
Bacteria , Proteobacteria , WP_010962557.1 MULTISPECIES:
bifunctional demethylmenaquinone
methyltransferase/2-methoxy-6-polyprenyl-1,4-benzoquinol
methylase UbiE [Wolbachia]"
/cog="UbiE COG2226 238 Methylase involved in
ubiquinone/menaquinone biosynthesis"
/pfam="Ubie_methyltran Methyltransf_2 Spermine_synth MTS
Methyltransf_23 Methyltransf_31 Pfam-B_8157 MetW
Methyltransf_18 Methyltransf_26 Methyltransf_25
Methyltransf_11 Methyltransf_12"
/tigr="TIGR01934 MenG_MenH_UbiE 223
ubiquinone/menaquinone biosynthesis methyltransferase"
/product="bifunctional
demethylmenaquinone
methyltransferase/2-methoxy-6-polyprenyl-1,4-benzoquinol
methylase UbiE"
/translation="MSTIKIEKKSQLVKEVFDSDVASRYDTMNDIMSLGMHRLWKDKMV
NSVHFTKNSKVLDVAGGTGDIAIRVVRKEPSAKVTVCDINQNMLNRGRDKAINSNOIN
FDWVCASAESLPFEDSEFDYCTIAFGIRNVSDRKKALNEAHRVLKPHGKFICLEFAPM
HYQNEIFTKLYDLYSFKVIPKIGSIVAKDKSSYEYLVRISIREFPTQADFKMEIEEVGF
KNVEFHNMSYGIVALHIGTK"
/besthit="qcoverage 100 , hcoverage 100 , similarity 100
, identity 100 , evalule 4.01e-170 , alnlength 238 ,
Bacteria , Proteobacteria , WP_010962557.1 MULTISPECIES:
bifunctional demethylmenaquinone
methyltransferase/2-methoxy-6-polyprenyl-1,4-benzoquinol
methylase UbiE [Wolbachia]"
gene 30085..31200
/locus_tag="wEsol_01134"
CDS 30085..31200
/locus_tag="wEsol_01134"
/codon_start=1
/transl_table=11
/fullproduct="qcoverage 100 , hcoverage 100 , similarity

```

100 , identity 100 , evalue 2.42e-240 , alnlength 371 ,  
 Bacteria , Proteobacteria , WP\_015589075.1 MULTISPECIES:  
 FtsW/RodA/SpoVE family cell cycle protein [unclassified  
 Wolbachia]"  
 /cog="FtsW COG0772 381 Bacterial cell division membrane  
 protein"  
 /pfam="FTSW\_RODA\_SPOVE"  
 /tigr="TIGR02614 ftsW 357 cell division protein FtsW"  
 /product="FtsW/RodA/SpoVE  
 family cell cycle protein"  
 /translation="MNIKLWYRTLDYYLILPVFFLLTISFILVYSASPVIAQRLSLPQ  
 DYFIRRHTIYIVLSLITLVTFSLNTRTILNLSFAGFILFTILVAIAIILGIEVKGAK  
 RWLHIVKISVQPSEFVRPFSSVVIASILASEMKFKIHISIIIFLLVFVLLLLQPDFSM  
 SMLLTYSFIGQMFIACIPFLYFLCIIGMATTTGTIAYLCLPHIKQRIYNFVFFTQRDN  
 FQVTKSLEAFKRGQLTGVGPGEKSVKASLPDCHTDFVFSVLAEFGLITCLATLMLFG  
 IISARLLYVAYRENEFNLLVILGISMQFITQFIINIGVTLSVFPTTGITLPLLSYGG  
 SSSLSSSIALGIMLSFSRNQAIALKFRERIMLGRYMD"  
 /besthit="qcoverage 100 , hcoverage 100 , similarity 100  
 , identity 100 , evalue 2.42e-240 , alnlength 371 ,  
 Bacteria , Proteobacteria , WP\_015589075.1 MULTISPECIES:  
 FtsW/RodA/SpoVE family cell cycle protein [unclassified  
 Wolbachia]"

gene complement(31395..>31806)  
 /locus\_tag="wEsol\_01135"

CDS complement(31395..>31806)  
 /locus\_tag="wEsol\_01135"  
 /codon\_start=1  
 /transl\_table=11  
 /product="hypothetical protein"  
 /pfam="PDDEXK\_2 Pfam-B\_12519"  
 /tigr="TIGR01784 T\_den\_put\_tspse 273 conserved  
 hypothetical protein"  
 /translation="KDFQFIFIELPKFSKSKVEQLESTIERWCFFFKYADETTDEDLR  
 KIAEKSPIIKLAYDELDFHWNEKDLIAYEERIMDLRKEEAILEYRLDLAKEEGRKER  
 EIEVAKNLLKAGVSFNIIAQTTGLSMSEIKELQN"  
 /besthit="qcoverage 100 , hcoverage 62.3853211009174 ,  
 similarity 97.1 , identity 94.9 , evalue 2.26e-78 ,  
 alnlength 136 , Bacteria , Proteobacteria ,  
 WP\_151808050.1 Rpn family recombination-promoting  
 nuclease/putative transposase, partial [Wolbachia  
 endosymbiont of Nasonia oneida]"

gene 27004..27090  
 /locus\_tag="wEsol\_tRNA-22"

tRNA 27004..27090  
 /locus\_tag="wEsol\_tRNA-22"  
 /gene="tRNA-Leu"  
 /intronpos="0..0"  
 /program="tRNAscan-SE"  
 /cove\_score="65.1"  
 /evidence=predicted  
 /type="Leu"  
 /anticodon=TAA  
 /product="tRNA-Leu (TAA)"

gene complement(3201..3272)  
 /locus\_tag="wEsol\_tRNA-23"

tRNA complement(3201..3272)  
 /locus\_tag="wEsol\_tRNA-23"  
 /gene="tRNA-Cys"  
 /intronpos="0..0"  
 /program="tRNAscan-SE"

```

/cove_score="55.3"
/evidence=predicted
/type="Cys"
/anticodon=GCA
/product="tRNA-Cys (GCA)"
gene complement(17724..19237)
/locus_tag="wEsol_rRNA-3"
rRNA complement(17724..19237)
/locus_tag="wEsol_rRNA-3"
/product="16`S ribosomal RNA"

```

# ORIGIN

```

1  aaaaaggaaa  tgctgaaaat  ttattaatta  ttacagatta  tcctgaattg  attcagcagt
61  atgtgaaaaa  ctgggaggca  cgaatgtcac  aatccttaca  atacgctccc  aactaatcga
121 gagcgcttgc  tcaaaatcag  ttttaaaaac  agcaaggagg  agcttttttg  attgattggc
181 ataatgatta  tgatataatg  aactaaaaat  ttaaggaata  aagtaatgga  ttatataaat
241 gatgctgccg  gtagctacac  tgctattcat  gatttttttc  aaaacaacgg  tgttgagat
301 tacaaagttc  aatgcaatta  tgggtgggtg  ccgtatgcta  ctgatgagta  cgtgcattct
361 ggcgataaat  tttggagtaa  taatttcata  gactcacatt  ttggcaggga  aataaaaaatg
421 taccctcaaa  gtgaactttt  agctaaagaa  tatgctggaa  atacgttgcc  agtttcaata
481 tactagata  aggatttaat  aaaaatgaag  gaatgtcaga  aaaaaacgaa  atttgtggaa
541 ctagaaaggg  agtcagggtg  tttagtgcac  gataagcaaa  agtatgtaaa  gtgttacaca
601 acaaagctat  catatgatga  tgtacatatt  tacaataacg  ataaagtttc  aacatttagc
661 ataaaatacg  acgtgccaaa  tgatccgaaa  tacagtttta  atataacatt  tacaaagggt
721 aatgataata  aaccaggatt  ttggcagaaa  tttaaaaata  tgttttaacg  tgaccattca
781 ctggttttta  ctcaatcaac  caacaacagt  taatatcaaa  tttttataat  taaaaaatat
841 gctatttttt  aaaactttca  ttctccttga  ctctgtcaac  ttcacaaaac  aactcttgga
901 ccaaagtgtat  ctggcataac  accttttggt  aacttgctac  ttcttttttt  ccgcatctcc
961 gacaacagcc  attgatattc  cactacataa  ggcttgattt  ttggtagatc  aactttttta
1021 tgaataatac  tatgcttctc  cttaaattga  ccatttaccc  taaacgctat  tagcttcctt
1081 aaaattttaca  ttaatgccta  ttttgcctaa  actgaagcgt  cttttccaat  tttttctagc
1141 atcaactcag  cagctttttg  ttcagcaatc  tttttactag  aagcgcatgc  agaaacttta
1201 ccataatctt  ctatgcaaac  tgatatagta  aattcaggat  tgtgcgctgg  tccagtttgt
1261 ttacaagct  catactctgg  taaaggcaat  ttgtttttct  gagtccactc  ttgcagtggg
1321 gtttttaggat  cttgaggggg  gtcaagcatg  ccttttagcta  gcttttccca  atattggata
1381 ataaattttt  caacattttc  aagcccgcga  tcaatataaa  ttgcacctat  tagtgcttca
1441 agcgagtttt  cttaaatttt  taagttacat  ctccctccat  tgcagcgttc  actattattc
1501 atgatgataa  agctgcctaa  ttttattttc  ttagcaacat  tagcaatggg  gttgccacaa
1561 actaaatccg  tctttctttt  tgccaatgct  ccttcttttt  cttcaggaaa  tagtttaaac
1621 agtgtggcag  atacaaccat  attcaaaaca  ctatcgccca  aaaactctag  tctttcgtag
1681 cttacaatct  ggttttttgc  attcctttta  tttacgcttg  ggtgagttag  tgccctctct
1741 aatattgcat  aatttgtaaa  tttataatca  atgatcttag  atattgcata  attcaaactc
1801 ttcataccca  ttattttaaa  gaataacact  tcctaccaca  cttttatacc  aaagaattag
1861 ttttgtttta  ttaaaataat  accaacaact  tccaaaatat  acagtttaat  agacttcttg
1921 cataaccatt  atttgaataa  tgattcatcg  atgttattcc  agtgtcgggt  acttaggtga
1981 cagagaagat  gctttaatgt  atacaacca  ccacctcact  aatgttacta  aatccatctc
2041 tccttattag  ttctgcaagt  tctagattaa  ttttgtttac  aacttgaggg  ccgtggtata
2101 tgagagcagt  gtacaactgc  accaaagaag  ctccctgcct  tattttttta  tatgcatcag
2161 caccacttga  gattcctccg  catcctacca  acaatatatt  gcccttagta  agtttgtaca
2221 tatcgctcaa  taactcggtt  gaaagtttaa  acagcggttt  gccactcaac  ccaccactct
2281 cgttgtgggt  ggaatgtaag  ttattccgac  tgatcgtagt  gttgctcact  gttaatccgt
2341 caatcttata  ttccaacgca  agctcagcga  tattttcttt  cgtttgctga  tctatatctg
2401 gtgagatttt  taatattatt  ggtatggatt  tagaattatc  aattgatttc  cgggttagag
2461 ttacggattt  caacaattcc  gataattctt  gcttattgtg  cagattgcgt  aaattaggcg
2521 tgtttgggga  tgagatgttc  agcactatat  aattgctttt  tccatatact  atctttatta
2581 agtcaacata  atcgctgatt  tggtcctttg  atgtactgtt  ttttcctatg  ttgatgccaa
2641 aaatgcaatc  atcaagcttg  gttttatcta  tttgtttaag  aaagtagtct  attcctttat
2701 tgttaaatcc  caatctgtta  attacccttt  gatctttaat  taaccgaaaa  attcttggtt
2761 ttttgtttcc  atattgtgga  ttacgagtta  cagtaccagt  ttcaataaat  ccaaaaccaa
2821 atgaaagcat  aggccttata  acttctgcat  tcttgtaaaa  acctgcagcc  agaccacagg
2881 ggcttctgag  cttattacca  aaaaaattca  cactcaaaga  ttctggtagc  tctataggat

```

|      |             |            |             |             |             |             |
|------|-------------|------------|-------------|-------------|-------------|-------------|
| 2941 | tcttataagg  | tattttcttt | aatgccataa  | ttgccaaaga  | gtgagcaact  | tcgggcggca  |
| 3001 | gtaaaaacaa  | taaatcacgt | aatatcattt  | tgtaaaacac  | tttgcttatt  | tttagtttat  |
| 3061 | tttttaccat  | gaaacgctat | aagagtataa  | ccataacttg  | aaaagaaatt  | gattttactt  |
| 3121 | atgaataatt  | ttctctatag | gttacacact  | taaagctact  | gttgaattga  | gcaactttta  |
| 3181 | caagatatag  | aaaatgaaag | aggccgggac  | cggaattgaa  | ccggtataaa  | aggatttgca  |
| 3241 | gtcctctgca  | taagccattc | tgccaccag   | ccgtttttta  | tgtgtagata  | tccattatat  |
| 3301 | cttttagcat  | agataaagct | tcctcccttt  | tgcgttgga   | agtgttacgt  | ccaatgattg  |
| 3361 | aaccattacc  | accaccctgc | ttaatttctt  | tcgcttcatt  | gcataatgtca | ttcactgatt  |
| 3421 | tcgactcgcc  | accagaaaaa | attactattc  | tttttctctg  | aaaacaagat  | cttttaacat  |
| 3481 | attcaattct  | tttaggtaat | gattcaatat  | tttctgtttc  | tattttctcc  | ctttccaaat  |
| 3541 | atntagttgg  | aagttttact | tttattatat  | tagcgccaag  | caaagctgcc  | atgtgtgcag  |
| 3601 | cataggcaat  | aacatcaacc | gctgtttcac  | cttctttgga  | aattccttca  | ccgctgggat  |
| 3661 | aagaccatag  | cactactgca | agcccataag  | atgtggcttc  | agctacgatt  | ccacgggctt  |
| 3721 | cttccatcat  | atcgaaacac | ttagcagaac  | caggatataat | agtaaataccg | acagctaagc  |
| 3781 | agcccaaacg  | cagtgcattc | ttcacagaag  | aggttattgc  | ttgatcagaa  | gtcagatcct  |
| 3841 | tcgaatgtaa  | agagttggaa | ctattaagtt  | tcaaaataag  | tgggagcatt  | ccagcataag  |
| 3901 | ttgaagcacc  | agcttcaatc | ataccaagtg  | gagcagcata  | tgcaacttact | cccgaatcaa  |
| 3961 | ccgcaagctg  | aaaatgataa | tgtgggtcat  | aagcatcagg  | gttaacttca  | aaacttttat  |
| 4021 | tggcccgtgt  | tcaaatacct | tggtctactg  | gcagaatcac  | taatttgcca  | gtgcccga    |
| 4081 | gctttccatg  | catgagaata | cgagtaagat  | ttgcttttac  | cccagggttt  | tcactttcgt  |
| 4141 | agtagcttag  | gacttgtttt | actttatcac  | ttatcactat  | aattcaaatt  | gaatttaagt  |
| 4201 | tatagattgt  | aacaaagatg | aagttcaata  | caaggatttt  | aaactatatc  | aaaagcaatt  |
| 4261 | ttattttcta  | ctttattcat | atagattctt  | aatttctttc  | cttttattaa  | tttacgattc  |
| 4321 | agtatttctt  | ccgctaagta | actttttatc  | tctttttcaa  | taagtctctc  | tatcggacgt  |
| 4381 | gctcccat    | ccttactata | acccatttgt  | acaagataag  | atcttacttc  | atcctctacc  |
| 4441 | aagcagttta  | tgcccttttg | cgtcagctgc  | tttttcagtt  | cctgaataaa  | tttatctaca  |
| 4501 | atatgcagaa  | ttatatccgc | atttaagtca  | gaaaaagaaa  | taatcgcatc  | aagacgatta  |
| 4561 | cgaaattcag  | ggctaaaaac | ctgttctatc  | gctttttcac  | tatcaccagt  | gttaaatttt  |
| 4621 | ttatgcccaa  | agccaacaaa | acttttgctg  | cgttcagctg  | ctcctgcatt  | agttgtcata  |
| 4681 | attaagatta  | tattggaaaa | gttaacttta  | cgcccgtaag  | tgtctgtaac  | gcaaccataa  |
| 4741 | tccataat    | gtagcaatat | attatagata  | tcgctatgag  | ccttttcaat  | ttcatcaagc  |
| 4801 | agcacaacac  | tatattgatt | attagataca  | gactctgtga  | gtaatccacc  | ctgatcataa  |
| 4861 | cctacatatc  | caggaggaga | accaatcatc  | cttgatatcg  | tatgagactc  | aatatatctg  |
| 4921 | gacatatcaa  | agcgataaag | attcatgccc  | atgctttctg  | ctaattgttt  | tgctagctcg  |
| 4981 | gttttacc    | caccgggttg | ccctgcaaaa  | agataatttg  | ctaaaggctt  | attgtaattt  |
| 5041 | ctcaaccag   | atntagcaat | tttaatagaa  | ttaacaagag  | attctattgc  | ctgctcttgg  |
| 5101 | ccaaaaatca  | ccttctctag | attagctttt  | aaagacttta  | ctttctgcaa  | atcatcagat  |
| 5161 | tcagatccgc  | aaggcacatt | tgtaattcta  | gtaatagtat  | tcttaatatc  | tctactat    |
| 5221 | acaattttac  | ccctgtttct | tagcaatttta | caatatgccc  | ctgcctcatc  | aataacatca  |
| 5281 | accgctttat  | caggtaatat | tcgcccagta  | atatacttat  | gcgaaagttc  | agccgcagac  |
| 5341 | ctaattggcat | tctttgtata | atatactcca  | tgataccctt  | catagtagtg  | ctttatacca  |
| 5401 | tctagtatct  | ttatcgtttc | gttaacagaa  | gattccttta  | acattaattt  | tttgaaacct  |
| 5461 | cctcgctagt  | gcttttatct | tttcaaaact  | agcgctgtat  | tctctatatg  | tagttgcacc  |
| 5521 | tatacaacgc  | agtgtacctc | ttgcaagcgc  | aggtttgagt  | aggttacctg  | catcaagaaa  |
| 5581 | gctaccactt  | gtagaacctg | ctccaatgat  | agtgtgtatt  | tcgtcaataa  | aaaggatagc  |
| 5641 | acctggtttt  | gcctcaatcg | cttttattat  | agattttatt  | ctctcttcaa  | aatcacctct  |
| 5701 | gtagcgtgtc  | cctgcaagga | gtgatcccta  | aatccaaagc  | ataaattata  | ctggacctga  |
| 5761 | gcgcacttgg  | aacactgctt | tcaatgatct  | tgagtaccaa  | accctcaact  | attgtgggtt  |
| 5821 | tgccaacacc  | tgggatctcc | aacatataaa  | gggttggttt  | ttctacgcct  | caataatatt  |
| 5881 | tctatagtgc  | gattttaatc | ataatcacga  | ccaataacat  | aatctat     | tttgcttctt  |
| 5941 | gcatagtcat  | ttaaattttt | acaataactt  | tgtagaattt  | cctcatcttt  | tagtagctca  |
| 6001 | cctttattta  | ctgtagtagg | agcgtcatta  | tttttatcaa  | gttttacttt  | atgatttagtg |
| 6061 | gtgtattcat  | ctatatcgtc | agagtatttc  | atgttagata  | tatggtaaat  | caaattggaa  |
| 6121 | tcttttcgcac | ttttgtttct | gcaatagatt  | ttcaacgtat  | aagtcttgcc  | ctagacaaaa  |
| 6181 | tttctactag  | aacatttgct | ccatttattt  | cttttttccc  | caagctatga  | gcccgtatta  |
| 6241 | ttgctctgtg  | tattatgcat | tgaacatttg  | agctagggtt  | aactccactg  | ataatcaatt  |
| 6301 | cagaactgct  | ttgtaaaaaa | cctttttatat | tattattata  | atcattagcc  | ttaatattgc  |
| 6361 | atcttgatag  | aatgttatcc | atactgatga  | tttcatcggc  | tctgatatta  | catcttgata  |
| 6421 | aaacgtaatt  | tacatccacg | tcttttagtta | acgccagcaa  | taaatgttct  | actttcgcatt |
| 6481 | atttaagatt  | aaaattagaa | gcaatgaata  | gtgctctatt  | caaacttgcc  | tctaagtttt  |

|       |            |             |             |             |             |            |
|-------|------------|-------------|-------------|-------------|-------------|------------|
| 6541  | tggaatcat  | ctcctattct  | ctttaaaagt  | gggaactcat  | atataatgaa  | tagcacacaa |
| 6601  | ttattaaaaa | aatttgaaat  | ccagcagttc  | gctgtagcca  | atttgaatcc  | cactctggat |
| 6661  | ctacgtcata | gcaccgcaat  | atctcagcat  | agattccgct  | aatgagtagc  | ggaatgacga |
| 6721  | gttttacgct | tatcaaattg  | taggtaaatc  | ctatttaata  | cgctttttct  | agtactctgc |
| 6781  | ttttcttctt | aaatgcattg  | atcttttttc  | taccgtattt  | agtctttaac  | gtacttggcc |
| 6841  | ttttaagac  | ctttttgctg  | ttacgttttt  | taaattgcac  | actacaatca  | aaatttagct |
| 6901  | ctccttcttt | gtctgccagt  | acaggcagtc  | ttctcttatc  | ttgaggtgta  | acaaaagata |
| 6961  | gcgcataccc | ttcagctcca  | gcgcgctgcag | ttctacctat  | acgatgaata  | tagtcagctt |
| 7021  | gcgattgtgg | tgcatacata  | ttgataacat  | gttgaatgtg  | gggaatatca  | aggccgcgag |
| 7081  | aagcaacatc | tgttgcaacc  | atgatttgat  | tacggccacg  | acgaaaagaa  | ttaatgaccc |
| 7141  | tttcgcgctt | gtgctgcctt  | aaatcaccat  | gaattgctaa  | agcgctatag  | tcattcttgt |
| 7201  | gcaatctggt | agctagctga  | tccgctcctc  | gctttgtttt  | gacaaaagata | atgattgatc |
| 7261  | cttcgcgctg | acatagttgt  | gtaacaagct  | tttcataattt | ttctgattct  | gatgcataaa |
| 7321  | caatttcttg | cttaattttt  | acagaagttg  | taacctcaca  | atcaacagaa  | atacgttctg |
| 7381  | gtcgattaag | gtacttctca  | gcaagtttta  | ctatatctcc  | aggaagagtt  | gcagaaaaca |
| 7441  | taagagtttg | ccttatttta  | ggcaaagtct  | tcataatttc  | ttcaatctga  | actccaaagc |
| 7501  | ccatatcaaa | catacgatcc  | gtttcatcaa  | gcacaagaac  | gctaacattg  | cgagtaatca |
| 7561  | aagtttttac | ctcaatatgg  | tctataatac  | gaccaggagt  | acctattaca  | atttgtgggt |
| 7621  | ttttctgaag | ctgatttagc  | tgcctaaaaa  | taggctcacc  | accaatcaac  | aaagcgaccc |
| 7681  | ttagtgcaga | attttgagat  | aagagttttc  | ttatctcatt  | tgttacctga  | tgcgcaagct |
| 7741  | ctctggttgg | cacgatgact  | aaagctgaac  | cagtgttagg  | ctcattcagc  | aacttagcaa |
| 7801  | ccaacggaat | agcaaatgct  | aaagtttttc  | cagtcctcgt  | ttgagcagat  | ccgagaatat |
| 7861  | ctttaccttg | tagcgctaag  | ggaatcgctt  | gtatttgaat  | cggagttggg  | acgaaaagat |
| 7921  | tatttttatc | tagagcttgt  | ctaagcgaag  | ctgggagacc  | catctcatga  | aaattattca |
| 7981  | caatacgtta | atcctgttaa  | aagacttcat  | aatagattaa  | tcttccaatc  | ttaaatttat |
| 8041  | tgcagatttt | ttatcttctc  | cgtttctacc  | gcgctcctct  | ttaacctcat  | aactcaccct |
| 8101  | ttctcctttt | attcccttct  | ctttattctc  | tcctttaagt  | gcctcagggt  | ttattcccga |
| 8161  | acgttccaat | gtgctaatat  | gtacaaaaac  | gtcaccctct  | ttaccttctg  | gcttgatgaa |
| 8221  | accatagcct | ttttcggcct  | taaaccattt  | tacattacca  | aattccattt  | aaacaactcc |
| 8281  | taaattatta | actaacatta  | ctaattgtgat | gaaaaacttt  | gaaattacga  | ttgagaatgc |
| 8341  | tttaagctta | gctattgaaa  | ctaaaccttt  | atactccata  | gtctattctt  | aacattacat |
| 8401  | gacaataata | cacaattggt  | gtacttgatg  | caaataaatt  | ttttaatcgt  | taagcgaacc |
| 8461  | tgcaaccgct | atttcgctaa  | ctttaatcgt  | tggtgaatta  | aattgcccac  | aaaaagttag |
| 8521  | atcatctgca | acgactaaat  | tgctaaacat  | atccttcaaa  | ttgctagcaa  | tggtaatctc |
| 8581  | atgtattgga | tacgttattt  | ttccattttc  | tataaaaaat  | ccggaagcgc  | cttggctgta |
| 8641  | atcgccattg | attaaattga  | caccaaaacc  | aaataaatca  | gttacatata  | ttccctcttt |
| 8701  | cacttcctga | attaattctt  | caaacgatac  | atcaccattc  | tcaatgtaga  | ggttactagc |
| 8761  | tgcaggaata | actgcagcat  | tacttgcacg  | agttgcactt  | ccggttggtt  | ctgagtctaa |
| 8821  | ttttctagcc | gagtataagt  | ctaaaatcca  | attttgtaat  | attccgtttt  | ttacaaatat |
| 8881  | atttttcttg | ctagttatcc  | cttctccatc  | aaatggtctc  | gatgctatgc  | ctcttggcaa |
| 8941  | caatggatca | tgcataatat  | taattctatc  | gttgaaaatc  | tgagcgttta  | aactaccctt |
| 9001  | caagaaagaa | ctggttgctta | taatactgct  | cccatttata  | gcagaagcaa  | aactttttac |
| 9061  | tagccctttt | gctgctcttt  | tttcaaaaaa  | aactggaaat  | ttaccagttt  | tcattgtacg |
| 9121  | tgaattcaat | tgatcaactg  | ctcttttttg  | tgcttctttt  | cccattaact  | ctggcaactt |
| 9181  | taaatcacta | aaattacatg  | ctatatcata  | atcgtaacca  | accttcattt  | cactttctct |
| 9241  | tccagcaaca | acagagacct  | gattagcaaa  | ggttgattta  | ctaaacgagc  | caataaaacc |
| 9301  | agaaacagtc | gataataactg | tattcactaa  | agcgatatgaa | gaagaggtct  | cttcagaatt |
| 9361  | agtatactc  | ttatgtgcaa  | gggctgaatt  | ttctgcagct  | tcagcaattt  | cttttagggt |
| 9421  | atcaacgggt | acaacattat  | tatctgagat  | acttaaatct  | gcagaagaga  | tataattact |
| 9481  | accatttaca | gcaaaattaa  | tgcaaggatc  | ttctggcgca  | ttctttgcc   | tttctaccac |
| 9541  | ttggcttact | gtatcactca  | gattattcaa  | atcgtttgta  | gaaatatacg  | cagctttggt |
| 9601  | tttacctgct | atagctctga  | ttcctacagt  | gcaattttta  | gattgtgata  | tttgcctaat |
| 9661  | ttttgataga | cgctgagaaa  | ctgaagtctt  | attagtttca  | tatattgtaa  | cttccgcctc |
| 9721  | ttgattttgc | ttttttatta  | gttttagtaat | atctgctgca  | atattttaata | tattcatttt |
| 9781  | ctattcctta | gatttctata  | aagattctgc  | accacctata  | acttcaatta  | aatcagtcgt |
| 9841  | aatcgctgct | tgacgagaac  | gattataaag  | caatgctaat  | ttgttcagta  | tctctttagt |
| 9901  | gtttctgttt | gctgattcca  | tagcaaccat  | tctagcacta  | ttctcactcg  | ttgcactttc |
| 9961  | aagtaaagca | gagtaaagag  | caattacaac  | gtaatcttga  | accaaagatt  | ttaaaataaa |
| 10021 | ttcaatattt | tgtggttcat  | actcatagcc  | gtaatctggt  | gttggaccag  | ccagagagct |
| 10081 | atcaatcaag | gatgagtctt  | tactccatgg  | ttttattggt  | tccaacattg  | gtttttgcgt |

|       |             |             |             |             |             |             |
|-------|-------------|-------------|-------------|-------------|-------------|-------------|
| 10141 | gaaggtatta  | tagaattttac | tataaaaaaac | tttaacttta  | tcgtattttac | ttaaatctat  |
| 10201 | accatcaacc  | aaagcttcta  | cgtgcttttaa | cgtgattccc  | ttactatttt  | caattttttaa |
| 10261 | gatactttta  | gagtcaaatc  | tattttttacc | tacatcaaaa  | gctttttttac | caagaaatac  |
| 10321 | aatatctact  | tttttgccat  | ttgcgattga  | cttattttaca | cgctcttgac  | taaatttgac  |
| 10381 | aatagaagag  | ttaaagtgtg  | cgcacaaagg  | acgatcagac  | gcaataatga  | atactaggta  |
| 10441 | agaaccgtcg  | ttactgacat  | ttagaatttt  | tgccagtaat  | tcttgatcaa  | ctgatagcat  |
| 10501 | taatgaaaaa  | ataatgttat  | gcagcttaga  | tacatataat  | tttgaattta  | ataacttctt  |
| 10561 | ttggctttgt  | aacaactttg  | ctgcagaaac  | catttgcatt  | attttcgtgg  | ttttctgtac  |
| 10621 | agacctataa  | ttcttaattc  | ttaaaggataa | ttcctttaag  | ctcttcattt  | tgtatacaac  |
| 10681 | cctgatttat  | taaaatatat  | aactgttagt  | gtctaaaagc  | aagttttttt  | gacattaaaa  |
| 10741 | ccaagtctag  | ctaagaaact  | tgcagggtta  | ttgtttggag  | ataaggatta  | tattaagaaa  |
| 10801 | gtgctctaac  | ttcagcaata  | tcaatgtgaa  | agtagcctaa  | tggttaatttc | tacactttgt  |
| 10861 | ggaattttat  | aatatataat  | aaacacaatt  | aaaactatta  | caacttgaac  | acttatgac   |
| 10921 | ccattgttct  | agttccctgt  | tacaattttt  | acatttccag  | cctggatcag  | gcaaagcttc  |
| 10981 | tgagcccatc  | ttgttttagc  | aataaattac  | cttgctcgtg  | tcttgcaatg  | taaccttgag  |
| 11041 | ttgtattaca  | ataaagtaga  | ttgacatgta  | attagctttt  | ttcatagcag  | tgtctaaata  |
| 11101 | ttgacttgca  | agatcatatt  | tacctgaact  | cattgaggac  | aaagcaagta  | aacagtaact  |
| 11161 | aaaataataa  | tcagggcgta  | agttgtatag  | tctttcagca  | cctttactat  | ttaaattgat  |
| 11221 | gtacatttta  | gctgactgag  | gagtaggatt  | tactgtatac  | tctgcctcta  | gcactgcaga  |
| 11281 | agcttttctg  | atttttccaa  | gtttaatata  | taattctgcc  | tttaaataat  | tgatgggctg  |
| 11341 | aaaaattgca  | ctataacgtt  | gtgctctaaa  | taaagacttt  | atagcctcct  | taaaatttcc  |
| 11401 | ttacttttca  | tattgctttg  | ctaaagcgca  | ataaaacact  | gcaaacattt  | ctttatgatc  |
| 11461 | aaaggggaga  | aaaatattgg  | acttaactgc  | ttccttcaac  | ctcaaaattg  | cattaatcca  |
| 11521 | atcttctttc  | aatatgcaat  | gctctatttg  | aaaggggaata | gatagcattt  | tatcgттаат  |
| 11581 | tgaactagag  | caatattcta  | taaatttttg  | aaagactact  | ttttcttggt  | tgaggtggac  |
| 11641 | aatcagctta  | ttggctagaa  | gtagagctaa  | gttacgattt  | ttatttgcaa  | tatttgtaa   |
| 11701 | accgttactg  | aaaaagctgt  | aatttcccgt  | cttacctgag  | ttaaagagct  | ttattaaaga  |
| 11761 | caacctatcg  | ctctcctcac  | tcagactttt  | aactagcttt  | tgggcattct  | ctatattgtc  |
| 11821 | taagtctatg  | ctaaagaaag  | cttcaaagag  | aagcaattct  | tccctatccc  | ttcttctatt  |
| 11881 | tcttatgttg  | gcaaagtgtg  | atgaaatgga  | ggaaaaaaag  | cgtacaagtg  | taattaataa  |
| 11941 | aaataataaa  | actacacaag  | taaaaataat  | gaaatataga  | tcaatactta  | tagtgtaatt  |
| 12001 | gcctaattcc  | aatttttatta | cttcaccact  | taccttgacc  | catataccaa  | ataaaaaacga |
| 12061 | aaaagcgaaa  | attataaaaat | aatcatgag   | atatattgta  | ataagcgatg  | atatattggt  |
| 12121 | gaaatattct  | tagaagctac  | aataaaaacca | ttcaatttat  | tcagccatgg  | cttgaattct  |
| 12181 | gaatgcgtta  | aattgcttac  | tgtaacagtt  | atattttgcc  | aatcattatc  | atttattgac  |
| 12241 | tcctcaattt  | ctgcgaattt  | tactcttaat  | ggatcatttc  | ggtcgtctac  | ctttatccag  |
| 12301 | tttgaaatga  | tttttttaga  | caatgtactt  | ttgttgtaat  | cgatagtatc  | aatagttttt  |
| 12361 | tcaaaagata  | acttcaattc  | gtgtaaggta  | tttatctctt  | tcaaattttt  | taattcatct  |
| 12421 | actgcatttt  | ctatctctgg  | atcgtaagc   | tctgatatac  | aaggctttat  | tgaatttata  |
| 12481 | tggttatcaa  | attttgcttc  | tcgcaataac  | gaattcttca  | ttttaaccac  | aagtaatagc  |
| 12541 | aattttgcaa  | ggttcttaca  | tcttgagtta  | ttatcacctt  | gctcacattg  | agtatgctga  |
| 12601 | cttctcttga  | gggtcaaatat | ctttttttct  | attctagatt  | gattaacttc  | aagcaacatt  |
| 12661 | ctaaattcat  | ccatgttttc  | cgttaaagct  | ttcacattgt  | tttcaacttc  | ttgctgattt  |
| 12721 | attttttaaaa | agattatggt  | atttattgtg  | atgtaaccgg  | taaataacaa  | tacaatttaag |
| 12781 | aaccaaccta  | tgtacttttg  | ctgagtatca  | ttcataacgt  | agtatctccg  | caggatcttg  |
| 12841 | tgcagctgcc  | tgcaacgcag  | gagcaattgt  | cgctaaaaat  | gataagagta  | acgcaagtgc  |
| 12901 | agaaatattt  | actacgtctt  | gggttactaa  | tatcactggc  | aaacttgaaa  | aaaagtatat  |
| 12961 | cataggatca  | aacagcttga  | cgttagtaat  | gttttctaaa  | aacactctaa  | tgctttcgat  |
| 13021 | attgagagaa  | aaaacgacac  | ctataatata  | gccaaagacaa | gttcccgtaa  | aaccgattaa  |
| 13081 | tagaccacaa  | gcgcaaaaata | tacgcataat  | gcttccactt  | gttgacacaa  | atgtacgcat  |
| 13141 | aattgcaatc  | gcggtatttct | tttcttgcac  | tatcatcatt  | aaatttgaga  | taatatttaa  |
| 13201 | cgctgctaca  | actataatca  | aagtgagaat  | taaaaacatc  | acatttcttt  | cagtttttaa  |
| 13261 | agcactaaaa  | taatggcttt  | gctgtgattg  | ccaactttca  | gcttccattc  | ctatttcttt  |
| 13321 | ttctatagca  | tctgccagct  | tatcagctct  | agtaacgtcg  | tctacaagta  | cttctatatt  |
| 13381 | ttttatgcta  | tttttataat  | taaaaaaggc  | ttgtgctgat  | tttagaggca  | tatatatcaa  |
| 13441 | ggtattatca  | tactcaaaca  | tacccatata  | aaataattgt  | ataactttat  | attttttcat  |
| 13501 | tcgcggcatt  | tcaccaagta  | atgcatcaaa  | attcttcaga  | tgatataaac  | gtaatttcgt  |
| 13561 | cgccatagtc  | aacgttcaaa  | gcttctgcta  | agcgtgctcc  | tattattatt  | cccttcatca  |
| 13621 | aattttttta  | catcacctat  | aattacatta  | tttgtaacgg  | cagtactatc  | aagcaagtct  |
| 13681 | ttagttgata  | cacctcgcac  | tacgctacct  | gcaattttac  | cgtttgctac  | aataataact  |

|       |            |             |            |             |             |             |
|-------|------------|-------------|------------|-------------|-------------|-------------|
| 13741 | tgatcattgg | tcataggagt  | agcttttaat | ataccaggaa  | ttctctcaat  | agatttttgaa |
| 13801 | actgcgtagt | aatctgaatt  | tatgttccta | tcaaaataaa  | cattaatatg  | gccatcaatg  |
| 13861 | ccaagtattg | agtcaagcaa  | ctttgctctg | aatccgttca  | tcacagacat  | caccactatt  |
| 13921 | agtgttgcaa | ctccaagggc  | aatgccgata | atagagaaca  | aagtcattat  | agagcaaaat  |
| 13981 | ctggcatttt | tcgctcgcaa  | atagcaagca | gccatagtaa  | tttcaaaggc  | aatggacatt  |
| 14041 | acaaaatatt | ttgaggttaa  | acattatatt | tttgaaactt  | cgtataattg  | tagacttttc  |
| 14101 | tttattttaa | aactagagat  | ttttgcttcc | ttaaatttag  | caggccttata | gagtatcttt  |
| 14161 | aacattagaa | tttcaaaatc  | ttccatatac | atcatccaac  | ctcactatat  | cattatcaga  |
| 14221 | taaatgctct | cctatctgaa  | attcaactat | ttcaagtgga  | gagccttatgc | ttctattttc  |
| 14281 | aatcctatgg | gaaacttccc  | ttgggatttc | tatcatatgg  | tcttttgcta  | tagcatattc  |
| 14341 | tttgtcttct | aaactaacat  | acccaactcc | tgatagcact  | atatgggtatt | catctctata  |
| 14401 | gtgatggaat | tgcttagaag  | tgcagcttaa | tggattttata | aaaagatatt  | ttataagaaa  |
| 14461 | attttcgctc | attaaaatta  | tactacaaaa | tccccatggg  | ttaacttctt  | tccttatcac  |
| 14521 | ctttactttc | ttaactttat  | gaataaatga | aattagactt  | ttgtttgggt  | gcttacaagc  |
| 14581 | tccaccaaat | aaatttttat  | tactttttgt | cgttgaaact  | ggttcttttt  | ctctaatac   |
| 14641 | atgctgaaat | gacaccggtt  | ctttactaaa | cttctcactc  | aattctaaaa  | ctgaattcca  |
| 14701 | agttccaaca | tccaaccaat  | cgaaattagc | ttctatcatt  | gcaacgtttt  | ttgctttctc  |
| 14761 | catcaccaag | taatcaatgg  | atatgccttc | aattcctgca  | aaatctcggt  | gttttaaata  |
| 14821 | cagaaatctc | tcttgcggtg  | tgaaatat   | aaaacataaa  | ttgtaaagat  | tcggggcaga  |
| 14881 | ttttttaatc | tcacttatgt  | agcgttttgc | tttaaacaca  | aatattccag  | agttccaata  |
| 14941 | atgatcgtta | cttaacttat  | gctcgggctt | ttctgtaaaa  | tctttcacta  | tatgacattt  |
| 15001 | ttctttctga | tcataactcg  | catttatata | gccgtattca  | gaattgaatt  | catgaggctt  |
| 15061 | aaccccaaaa | gtgactatag  | agttagtttc | agaggctaac  | ttagacgctt  | tttgagtaga  |
| 15121 | agcataaaaa | ctattcaa    | cacctataaa | atgggtctgaa | ggcagaatta  | acattgtctc  |
| 15181 | gttttcattg | cagagaagtg  | cagcaattaa | tattgccgct  | gttggtccaa  | ttttcactgg  |
| 15241 | ttcgaaaatc | acttttatatt | cttgcagtgc | atgcaattcc  | tccatcacta  | atgactcgta  |
| 15301 | ctgtatat   | gtagcaatta  | tgggcggcat | ataatcgctt  | tttagcctca  | acaaagtgtt  |
| 15361 | gtgaaacata | gtgttctgac  | taaatat    | ctgaaattgc  | tttggcttag  | ataaaggcca  |
| 15421 | aagtctgcta | ccactaccac  | cacacaatat | tacagggcgc  | atntagttaa  | gatattaatt  |
| 15481 | aaataattaa | tatcttatac  | tgagggcaaa | atacatgcaa  | gtttttgttg  | tggaatagtt  |
| 15541 | aataaagaaa | gtaaatgttg  | atttaaagta | attgcta     | agagtgatca  | tgtgtagcgc  |
| 15601 | cttgcccttg | ctgtgaattt  | cttctat    | gtaattcctc  | aacatgacct  | tttcttttat  |
| 15661 | cacttaatat | ttcattaccc  | ttattttgtt | cttcctcagg  | actcttttagt | atttcattac  |
| 15721 | tcttgcta   | ttctttatca  | tccccttggt | tctttggcct  | tctagcgtta  | agctcatccc  |
| 15781 | atgtgcccac | tagtgaatca  | cgattcccat | gatccggctt  | tagcctttct  | tcacctttaa  |
| 15841 | taacattaaa | gtcacttttt  | gcttcttcca | aacatccttt  | cagttgggtg  | ttccacatgg  |
| 15901 | tgtagtaagc | atcaccatat  | tttttctcat | ttgctacaaa  | caataaaatt  | ggagccttaa  |
| 15961 | gtatagtagc | tcccatattc  | actaaat    | ttattgccat  | tgcaggagta  | aataaaagat  |
| 16021 | aaccaaaga  | ctttgcaatt  | gggttttggt | cgcttattaa  | atacttccct  | aactttatag  |
| 16081 | gaagagaagt | caacaattta  | gtacaaactt | tagccaagct  | tgtagcaaaa  | acgataggaa  |
| 16141 | cagatataag | actttttatct | agctctagat | taccattctg  | atctctaatt  | tctgaaaaat  |
| 16201 | gggtgcttag | ctttttgtca  | tcactagtgt | ataataattc  | tccatttctt  | cctttttcat  |
| 16261 | caacaacttc | ctgaacttta  | ccttctttat | ttttcacctc  | tttagtttagc | acagaagagt  |
| 16321 | tagttaattc | aaacggatat  | tgaggattct | tagttttttg  | agcttcgaaa  | attggcgcgt  |
| 16381 | gttttttcaa | atccattctc  | gaaaagccta | atgggtcaaa  | gtatgactta  | tttaaccaat  |
| 16441 | ctataggaat | ttgcttacct  | tgattgtcta | tataattgat  | agtaaaataa  | gatctatcat  |
| 16501 | tatcttcatt | tttgggaaact | aaagataatc | tgaaacttgg  | ttgttttcta  | ttctcatctt  |
| 16561 | tttgaccata | caaaagttta  | taggttggat | ttttatcttt  | atctagtata  | gcatttccat  |
| 16621 | gcatatccct | gtttttctatg | attttagcag | actgtacaat  | ttgatcataa  | ttttttggat  |
| 16681 | actggcattt | ccttccatca  | tacatcatta | cctttctaag  | gtcttcgacg  | taaacttgag  |
| 16741 | attcaggtga | agtaagcaga  | ccttttgctt | taagtgtgag  | atctattgct  | ccctttttta  |
| 16801 | atgcttcaaa | catattgtca  | aaccaa     | gctataatgc  | tatagttcaa  | taataaaact  |
| 16861 | agtacactaa | taatata     | acacagcacc | gggtgatttta | caagaaaata  | tgctgtaga   |
| 16921 | agataaagat | tgtaaaagcg  | agggttatat | aagtaatgct  | tgataagtac  | tttatgcatg  |
| 16981 | taattgtaaa | aatcctcaaa  | ggtacgctgt | gtatataatc  | ttcgcatact  | acctgcattc  |
| 17041 | caagaactgc | gtgccaaaaa  | atgcaaaaca | acaatacaac  | aaaaaataaa  | agctctagag  |
| 17101 | ggtgattaat | aaatttttca  | ctaaaagaca | aagagctatc  | agtataaaat  | gtgcaagaaa  |
| 17161 | atgaatagat | aaaccaagaa  | aacaggaaca | gtaaaattac  | cgcagaaaca  | cgctgaaccc  |
| 17221 | accaatgatg | tactgaattt  | ccagactgac | tcatataaac  | ataaataaaa  | aagccatagt  |
| 17281 | agaaagaagt | agcgttactg  | tcagcagtat | agcactcctt  | gaaacgccag  | taattttctaa |

|       |             |             |             |             |             |             |
|-------|-------------|-------------|-------------|-------------|-------------|-------------|
| 17341 | attaagccca  | gcattcccaca | ataaatgacg  | aataccatta  | agaaaatgat  | atacaaaaact |
| 17401 | tataaaacat  | aagacataag  | ctaattttagc | aacaggagt   | aataataatg  | cattttaagta |
| 17461 | ccttactata  | agtaactcag  | gaaagtaaac  | atgtaatatg  | aaataccaag  | aaagtatcat  |
| 17521 | taataaaaagg | aatagcaaga  | taccagtcaa  | tctatgcata  | atagagaaaa  | aactagtaac  |
| 17581 | ttgtacttta  | tatatattgta | aatgtggaga  | aagagggtcta | tcactcataa  | aattccgtta  |
| 17641 | tcgggaaatt  | aaaataaagt  | agaagtaaag  | acagcagtat  | agcacataac  | aacaccatca  |
| 17701 | ttaaaaatgg  | taagttatgc  | gcaaagccta  | aggaggtaat  | ccagctgcag  | attcccctac  |
| 17761 | tgctaccttg  | ttacgacttc  | accccagtc   | ccgatccac   | tttaaataac  | tccctccttg  |
| 17821 | cgggttaggtc | gttagcttcg  | agtgaacca   | attcccattg  | cgtgacgggc  | agtgtgtaca  |
| 17881 | agacccgaga  | acgtattcac  | cgtggcggtgc | tgatccacga  | ttactagcga  | ttccaacttc  |
| 17941 | atgcactcga  | gttgacagag  | acaatccgaa  | ctgagatggc  | ttttaagggg  | ttagcttagc  |
| 18001 | ctcgcgactt  | tgcagcccat  | tgtagccacc  | attgtagcac  | gtgtgtagcc  | cactccataa  |
| 18061 | gggccatgat  | gacttgacat  | catccccacc  | ttcctccagt  | ttatcactgg  | cagtttcctt  |
| 18121 | aaagtcccca  | gcattacctg  | atggtaacta  | aggatgaggg  | ttgcgctcgt  | tgcgggactt  |
| 18181 | aaccacaacat | ctcacgacac  | gagctgacga  | cagccatgca  | acacctgtgt  | gaaacccggc  |
| 18241 | cgaaccgacc  | ctatcccttc  | gaataggtat  | aatttccatg  | tcaaggagt   | gtaaggtttt  |
| 18301 | tcgcgttgca  | tcgaattaaa  | ccacatgctc  | caccgcttgt  | gcgggtcccc  | gtcaattcct  |
| 18361 | ttgagtttta  | atcctgacga  | cgtagtcccc  | aggcggaatg  | tttaacgcgt  | tagctgtaat  |
| 18421 | acagaaagta  | aaacttccca  | tatttaacat  | tcacgttcta  | cagcgtggac  | taccagggtg  |
| 18481 | tctaactcctg | tttgcctccc  | acgccttcgc  | gcctcagcgt  | cagatttgaa  | ccagatagac  |
| 18541 | gccttcgcca  | ctggtgttcc  | tcctaataat  | tacgaatttc  | acctctacac  | taggaattcc  |
| 18601 | tctatcctct  | ttcaatctct  | agattagcag  | ttttaaaagc  | aattccaagg  | ttgagccttg  |
| 18661 | ggatttccact | tttaacttac  | taatccgcct  | acgcgcctt   | tacgccaat   | aattccgaat  |
| 18721 | aacgctagcc  | ctctccgtat  | taccgcggct  | gctggcacgg  | agttagccag  | gacttcttct  |
| 18781 | gtgagtaccg  | tcattatctt  | cctcactaaa  | agagctttac  | aacccaaagg  | ccttcttcac  |
| 18841 | tcattgcggca | tggctggatc  | aggctttcgc  | ccattgtcca  | atattcccca  | ctgctgcctc  |
| 18901 | ccgtaggagt  | ctggaccgta  | tctcagttcc  | agtgtggctg  | atcatcctct  | cagatcagct  |
| 18961 | atagatcatt  | gccttggtag  | gctattactc  | caccaactag  | ctaatactaat | ataggctcat  |
| 19021 | ctaatagcaa  | taaaatttttc | ccccgtaggg  | cgtatacgg   | attagttgcc  | gtttccaaca  |
| 19081 | attattccgt  | actactaggt  | agattcctat  | acattactca  | cccgtctgcc  | actaagttat  |
| 19141 | accatagcag  | gctacaatat  | aactccgttc  | gacttgcatg  | tgttaggcct  | gccgccagcg  |
| 19201 | ttcattctga  | gccaggatca  | aactctcaaa  | tttagacttc  | aacctataaa  | agggtgaggg  |
| 19261 | tacatcggat  | aaatccgaca  | aaaaataaatt | tagcttaata  | ctactgtctt  | tatttctact  |
| 19321 | ttagaaatat  | tttaattctcc | aactattcaa  | acaactttta  | gaatattatt  | atgtgatata  |
| 19381 | atcactatgt  | caatatgttt  | ttgcaaatca  | aaagcattaa  | tgtataaata  | tataactatt  |
| 19441 | tggaatatta  | ccatgaaaaa  | atacatcttt  | ctgcttgac   | tcgcgccaat  | gttagttggc  |
| 19501 | atcacattat  | acttattgcy  | caacattgat  | aacacaaaac  | aatctataac  | tgcaggtgac  |
| 19561 | aagtttttacg | aagtattatt  | cttaaaaaaa  | gataataagc  | cgctgctaga  | agaaatagat  |
| 19621 | tcaaattggg  | agtatttagc  | aaattttgaa  | cgcgcatcca  | atcatatctc  | agattcaatg  |
| 19681 | ccaacagaca  | cagcatctat  | ttataatgat  | ttggcagatg  | ataaagatgc  | tcctaattgt  |
| 19741 | ttgcgtgagt  | tagcacaata  | tttagaagta  | atgagcttac  | ttcactccaa  | cgggtgaaaaa |
| 19801 | ataaataaag  | ataaaattga  | taatttagaa  | tcaagtgcag  | tgtatcctta  | ttcaagccaa  |
| 19861 | gaagctattg  | ctgtagtaaa  | gatacacaa   | aacgacgtta  | agggtgcaac  | tgaaatattg  |
| 19921 | cgttccctat  | taaatgatag  | aaaatgccct  | atcctaata   | aagctaattg  | acaagaatta  |
| 19981 | ctcaggatat  | atgggaggtta | actcattgga  | ctttttgcat  | agcttttggc  | agcgcatcgg  |
| 20041 | atgaaacgaa  | aaaacttact  | tgacaccctt  | cgccagcgcc  | cttatcatga  | tagtgaagct  |
| 20101 | attgtatttg  | ctttcgccaa  | tctgcagatt  | aaaaggtaag  | gattacttaa  | tgtatcggcg  |
| 20161 | tcttatgttc  | aattttttgc  | agtatataga  | tactgtatgt  | ctttacaaaa  | cttcatctac  |
| 20221 | atctagattt  | ttatctaaat  | aagctgaacg  | cgcttataaa  | gcgttacaag  | acatcaaaaa  |
| 20281 | atgccaatat  | tcgacagaga  | tagtaaaaga  | ctagctaact  | cggggattct  | ttgtcttttt  |
| 20341 | ttctgcttag  | taaaatttct  | aaacatttgc  | agcgtaagtt  | agaggttgtc  | cggaaactag  |
| 20401 | taaattcaag  | catattccct  | ctttaacata  | accctactca  | tagctaggta  | tatgaaattc  |
| 20461 | tcagtggatg  | ttgtgagtaa  | atcatactcc  | ttcgatagcc  | ttctattcct  | attaacccaa  |
| 20521 | gcaaaaagtc  | tttctacaac  | ccatcttctt  | ggctgtactt  | taaacccttg  | ttctcttggt  |
| 20581 | ggtagtagct  | cagggtggcgt | atctttgtgc  | acccaaaatc  | tacatggagg  | ccttttaaca  |
| 20641 | atttcaatat  | ctatgtcata  | ttcttctctt  | atgtgattct  | ttaaatttct  | tccttggtat  |
| 20701 | cccattgtcag | cccacatttt  | tttaacttta  | gtataatttg  | ttctcatatt  | gtttaatgct  |
| 20761 | atttttaatac | catctctatc  | attttctgta  | gcagcgccct  | cgtaacaacc  | tagtataaaa  |
| 20821 | ccctgagtgt  | ctgtaattat  | atgccttttt  | ctacccttta  | cttttttact  | tccatcatag  |
| 20881 | cctttgatcc  | cccctttttct | gtagtcttta  | cagattgact  | atctactata  | caggcactcg  |

|       |            |             |             |             |              |             |
|-------|------------|-------------|-------------|-------------|--------------|-------------|
| 20941 | gctgctcatt | ccttcctatt  | tttcttctac  | tatatTTTgt  | aatttcataa   | ttcattttct  |
| 21001 | caaaaattcc | ctgcttcttc  | cattgcctga  | actgctcata  | cacagtcttc   | catagcggaa  |
| 21061 | aatcatttgg | taaataccgc  | cattgacacc  | ctgtacgcaa  | tacacagaaa   | attgcttcta  |
| 21121 | atatttctct | tttgctatac  | tttgcgggcc  | ttcctccttt  | cttgatgat    | actctgaagt  |
| 21181 | gtttttctat | tcttgcccat  | tccctttcgc  | ttagatctgt  | tggatacttt   | tttctcatct  |
| 21241 | ttaccccgtg | ctaaaatttc  | agatattata  | gccttttact  | tatttcggga   | caacctctaa  |
| 21301 | ctcctttgtt | ttgggagttt  | tatggaatgt  | ggcattgtcc  | ataactattg   | tagtaccatg  |
| 21361 | tggcaattta | ggtaataaca  | tcttctctaa  | ccatgtattg  | aatacctctt   | tgtcacaccc  |
| 21421 | acctttgaaa | gtcattgggtg | caataaatct  | ctttccaatc  | cacccgccta   | ttatactgat  |
| 21481 | tctctctcgt | tttcttcctg  | gaatatctgc  | ataaattttc  | tttcctattg   | gagcacgtcc  |
| 21541 | atactctcgg | tataacctat  | tatcaactcc  | tgcttcatct  | atatataaga   | tgctggaatg  |
| 21601 | gtctatTTTT | gagattttat  | cggtaaactcg | ctgcctatct  | tcttgattgc   | gctcttgata  |
| 21661 | tagtgtaact | tttttttaaa  | gtaattctta  | gctgtttcag  | cctataccaa   | attgaattta  |
| 21721 | ttccaaatcc | aagattttgt  | ttcatctctg  | ccagcgtatg  | atctggattc   | tttttaacat  |
| 21781 | attcttcgag | tatttttggg  | tctatTTTTc  | gaataaagct  | gccgtttttc   | gatggcctta  |
| 21841 | ggctttcacc | agcggctttc  | tttcttaacc  | agcggtacag  | agttgctatt   | cctatctcca  |
| 21901 | aaagctctgc | cacctcaacc  | tttgacttcc  | ctttttctat  | catcgatact   | gccctttccc  |
| 21961 | ttaaatccac | actatacgcc  | attataactc  | aaatagctta  | ttataccttt   | atcatttact  |
| 22021 | ttgggaagta | ctatagtaaa  | agatctattg  | gataatgggg  | cagatgttaa   | tgcagtaggt  |
| 22081 | caagataaaa | agactccttt  | acattgggct  | gctgcacatg  | gccgtaaaaga  | tgcagtagat  |
| 22141 | gccctactga | aagtaaaagg  | aatcgatgtt  | aatgcaaaaag | atcaagggtg   | aaagactcct  |
| 22201 | ttacactttg | ctgctgaaag  | tggttatcag  | caggtggtgc  | aagctctatt   | ggataaagg   |
| 22261 | gcagatgtta | atataaaaga  | taaaaatgaa  | aaaactccct  | taaatttagc   | taaggcagaa  |
| 22321 | gaaataaaaa | ctctattgca  | aaacgcagaa  | aaaaactgat  | gatgttaatc   | cagtattgca  |
| 22381 | agatgatgaa | gaagaaagcc  | aagttccaca  | aaatgctgct  | ttatttgagg   | ctgttaaaaa  |
| 22441 | aggtgaaatt | gataaggtaa  | aaagtcta    | aatggaagga  | gcagatgtta   | atgcattaga  |
| 22501 | tggaaacaga | tttactcctt  | tacggcatgc  | tattgtcaaa  | ggagacaaag   | atatggtctc  |
| 22561 | gcttttcatt | gataacaaag  | cagatgttaa  | tgcacagtct  | gaaaatggac   | gcgctctttt  |
| 22621 | acatgttgct | gttgacaaag  | ccaacaaaac  | gcaaccactc  | gatacaagta   | taatagaagc  |
| 22681 | tctattagaa | gcaaaaggga  | tcaatgttaa  | tatagcagat  | aaaaatggaa   | ggactgcttt  |
| 22741 | acatgaagcc | gctaaaactg  | acgatcagca  | aatagtaaca  | gttctattag   | aagcaaaagg  |
| 22801 | aatttatgtt | attccactag  | ataatactag  | cagcactcct  | ttaaatcttg   | cctctcaaca  |
| 22861 | aggcgggaaa | catatagtaa  | aaattctaga  | agaaacgcaa  | aaggatatcg   | aagctttgta  |
| 22921 | ttcagccggt | aaaagtgata  | attataagga  | ggttcaaagt  | ctattaagta   | aaaaagtaaa  |
| 22981 | cgttaattca | atagacagca  | atggaaaaac  | tcctttacat  | gaagctactg   | caagtggcca  |
| 23041 | taaagaaata | gtagacgccc  | taataaaagc  | aggagcagat  | gttaatatag   | cagataaaaa  |
| 23101 | tggaatgggt | cctttgttta  | aagctgcttt  | ctatggtcat  | aaagatgcaa   | ctgaagtttt  |
| 23161 | attaaatagt | ggagcaaaag  | ttgatacagt  | aatggaatca  | cttcttcaga   | gtatgatgga  |
| 23221 | atataattac | aatagtagcc  | ataaagatat  | agttaaagct  | ttattaaaca   | agggagcaaa  |
| 23281 | tgctgatgca | gtagattcat  | atggacatac  | tcttttgcat  | tgggctgcta   | gagaaggtta  |
| 23341 | tacggatata | gcagaacttt  | tattcaaaaa  | aggagcgaat  | gttaatatatac | aagataacga  |
| 23401 | tctatggact | cctttacatt  | ttgctacaaa  | aaataaagt   | tttatgggtt   | atgcagatcg  |
| 23461 | tccagcaaac | gcctctgcgg  | aaacagtaaa  | attcttaata  | aaaaaaggag   | cagatgttaa  |
| 23521 | tatagaaaat | gaagatggaa  | atactccttt  | caaattagcc  | actgatgaag   | gaataaaaaac |
| 23581 | tctattgcaa | ccagcagaaa  | aatctgatga  | tggttcagcg  | ggtggatcat   | cgacagatag  |
| 23641 | tgaagggggt | caagaggaag  | aaaaacgagt  | aggtgatgat  | actgaactac   | aatcagataa  |
| 23701 | tagcaaagaa | ggggaaaaaa  | ccagcaccac  | cagtgcagaa  | caaggaactg   | gtgtaagcaa  |
| 23761 | cggtagtcaa | cctactggat  | ctacacaaaa  | taagggagga  | caaaccagca   | ccaccagtgc  |
| 23821 | agaacaagga | actgatgtac  | aagacaacga  | tgtaggtcct  | gttgcttcca   | cagaacctgc  |
| 23881 | acaaacagaa | gaacagccga  | gctctttttt  | tggtagtttg  | tttagtatac   | ttatgaagcc  |
| 23941 | tttttcatta | attgcatcat  | tttttgggtg  | ttttttttca  | tgggtgtttg   | ggtctgacga  |
| 24001 | agaaaagtct | gacacacaac  | cttatgatga  | ttcttcttca  | cctgggggtcg  | atcaatcagt  |
| 24061 | tgaacaaaat | aatggtgatc  | ataatgacca  | gagcaatgtg  | atltgatagt   | gatcttctac  |
| 24121 | cggaaaagg  | gtcatcccag  | tgtcaagcac  | tgggatgaca  | ccgtcttgga   | tggaaaactg  |
| 24181 | gattccagt  | tcaagtgtg   | gaatgacatc  | atcttgata   | acgtcacgcg   | ctggaatgac  |
| 24241 | aaagaagagt | gggctttcat  | atggttatgc  | agaagtcta   | ctgaatgtaa   | accagtttct  |
| 24301 | cacacacaca | ttttaccaca  | tgatcagcgt  | tgatattaaa  | atgctcataa   | agtgttttat  |
| 24361 | aaggtgctga | ttctccgaag  | cttttcatgc  | caataaaat   | accgtttgaa   | cctatgtatt  |
| 24421 | tatgccaacc | catttcaact  | cgggttcaa   | ttgcaacttt  | aatgctgtca   | ttatttaata  |
| 24481 | ttgccgcttt | atattcatcg  | ctttgctcgt  | caaaaagcct  | ccagcatggc   | atagaaacaa  |

|       |             |             |             |             |             |            |
|-------|-------------|-------------|-------------|-------------|-------------|------------|
| 24541 | tccttgtacc  | tatacccttt  | tcctgcaatt  | tctcccttgt  | ttcaactgca  | atttcaacct |
| 24601 | cggaccccg   | agcaaatatc  | gtcactttta  | attcttttga  | acattcacac  | aaaatatatg |
| 24661 | caccaaactt  | cgataaatta  | gcagattgat  | cgatatcaga  | gtagaacttg  | cgcatgtaac |
| 24721 | ttacgttttg  | ccttgagagc  | gcaaacagtg  | ctggagattc  | tttcttttcg  | agtgcaatgc |
| 24781 | taacacactc  | cagagtttca  | actgcatcgg  | ctggcctaaa  | aacatataga  | tttggtatag |
| 24841 | cacgcaaaga  | ggctaaatgc  | tctattggct  | gatgagttgg  | gccatcttct  | cccactccaa |
| 24901 | ttgagtcgtg  | agtcatgaca  | tacataacct  | gctgcttcat  | cagagctgaa  | agacgtatag |
| 24961 | caggacgaca  | atagtcggaa  | aataccaaaa  | aagtgccgcc  | ataaggaaga  | atcgcgccgt |
| 25021 | gaagtgccat  | accattcata  | catgctgcca  | tagcgtgctc  | tctcactcca  | tagtggacat |
| 25081 | aagagccact  | ataattattg  | ctatttatta  | cctgcatgtg  | cttatattta  | gtgcaatttg |
| 25141 | acccggttaag | atcagcagaa  | ccgccgatta  | attccggcat  | atgttgtgtt  | aaaagttcca |
| 25201 | ttaccctacc  | aaaagaagat  | cgagtagctt  | cgtttggcat  | tagctcacat  | atttgtttct |
| 25261 | tcaggtcagc  | taaaacacca  | gcgatattat  | ccggcaaacg  | cttatcaagt  | cttcttttta |
| 25321 | gttcttcatt  | tttttctctg  | gattccagtg  | tcacgcaactg | gaatgacaat  | gaattgtaat |
| 25381 | tttgtttttg  | tctctcaaca  | gttttcttcc  | aggcattttt  | cacatcttct  | ggtacatgga |
| 25441 | atggttcata  | attccagttt  | aatttctctc  | tcatctgttt  | gatgtcttcc  | tccgaaaaag |
| 25501 | caccactgtg  | agcagaggat  | gtgccagcac  | ggcttgaaaa  | ttttccgata  | atggttttgc |
| 25561 | agcagatcat  | tgtaggttta  | tcagactttt  | ttgcttgctc  | tattgcaaag  | gatatggcat |
| 25621 | caaaatcatg  | gccatcaatt  | ttgtcaacat  | tccatccata  | cgctaagaag  | cgtttctcta |
| 25681 | catcgtcaga  | acaggaaagg  | caagtagcgc  | catctataga  | aatatcatta  | tcatcaaaaa |
| 25741 | gagctataag  | cttattcaat  | ttaagatgcc  | cagcaagtga  | tgctgcttca  | tggcttattc |
| 25801 | cttcataaag  | acagccatcc  | cctagcatca  | cgtaagtgtg  | gtgattgatt  | ctaaactgct |
| 25861 | tttcaagtat  | cgattcagca  | agtgccatgc  | caacagcagc  | ggcaaaccct  | tgccctaaag |
| 25921 | ggcctgttgt  | tgcctctact  | ccggaagtca  | agccaaactc  | tggatgacct  | ggggtcttgg |
| 25981 | atcccatttg  | cctgaagttc  | tttagctcat  | ctatgcta    | ataacctgtc  | aaatataata |
| 26041 | ttgaatatag  | taacattgac  | ccatgaccgt  | ttgataaaac  | aaagcgatct  | ctattgaacc |
| 26101 | atrtagaatc  | atcaggatta  | tgattcagat  | atrtagcaaa  | caaaacagtt  | gcaacatctg |
| 26161 | ccatgccaaag | tggcatacct  | gggtgtccag  | agtttgcttt  | ttgtactgca  | tcaattgata |
| 26221 | aaaaacggat  | ggcgtttgcc  | atagattcca  | aatgtgaatg  | attcatgtgt  | taatagaaaa |
| 26281 | acttaaaaa   | gaagtataaa  | agattatatc  | agcaaaaaaca | agttgacact  | gagtgtctaa |
| 26341 | atccttaata  | atctaaagtt  | aaatcgtgag  | agtttttata  | tgacaactgt  | tactactaga |
| 26401 | aagtatataga | ttagccgtag  | acttggtgta  | aatttatggg  | gtagagctaa  | agaccagta  |
| 26461 | aacaaaagga  | aataccctcc  | aggtcaacat  | ggatattctg  | gattcaagaa  | gttatccgac |
| 26521 | tttggttaagc | agtttgctgc  | gcataagaaa  | tttaagtttt  | actatgcatg  | ttcaagtaag |
| 26581 | cagctcagac  | gtacattttt  | agatgcttat  | aacagaaagg  | gttatacggc  | tgataatttt |
| 26641 | atcggtatct  | tagaatcgag  | attaagttct  | gtttttatacc | actctggtct  | tgttccaaca |
| 26701 | atrtactcag  | caaagcagct  | catatctcac  | aagcacgtta  | cagttaatga  | taaggtggtt |
| 26761 | aacatatcga  | gttatcgagt  | gaagccaggt  | gatataataa  | aaataagaga  | aagggcagca |
| 26821 | aaaatccctg  | tagtagtaga  | ggctgaacaa  | aaacaagagc  | gcaaggctcc  | ggattattta |
| 26881 | gaagcagata  | gtaaagagca  | ttcagtgaa   | tatttgaggt  | cacctcaata  | ttctgaggtt |
| 26941 | ccttattcag  | cagacatgga  | agtcaattta  | gtagtagagt  | tttactctag  | atagataaaa |
| 27001 | aaagcccgtg  | tggcggaatc  | ggtagacgca  | gcggacttaa  | aatccgtggg  | ttttgcgacc |
| 27061 | ttgggagttc  | aagtctcccc  | atgggcacca  | atrttaactta | gcagataaat  | acaaaaaagt |
| 27121 | atgaaatggc  | ttgatataga  | agatattgtg  | gaagctctgg  | aggaaaaatt  | tccaaatgag |
| 27181 | aatataatta  | gtatcagatt  | cactgagctt  | aaaaaaaagg  | tcttgagttt  | agaggaattt |
| 27241 | gatgatgatg  | aaaaacgctg  | taacgagaaa  | atactcgaag  | ccattcaggc  | agcttggtat |
| 27301 | gaggaaagat  | taaccgcata  | gcaataaacc  | atacgcaaac  | gtgatttcta  | ttacaatttg |
| 27361 | catatggatt  | atgctatttt  | ttggatctag  | cctggcaagt  | taataataat  | ttactaatt  |
| 27421 | acaattaaaa  | cagctataag  | gttaattatg  | aggcaaagat  | gacagcacia  | aatttggtta |
| 27481 | atggaacgat  | cttgacaagt  | gctacgttga  | gataagtttt  | gcataaaaa   | actgctttta |
| 27541 | cgggtgtgagg | ctagaggttt  | gtaaagcagt  | tagaaggttg  | tcatctaagt  | agcgtgacca |
| 27601 | gagctagatt  | ccgcgaacac  | gccgcggaat  | gacgactatg  | caatatgcgt  | tgccgagtg  |
| 27661 | cgattatggt  | cataccgtca  | cggatatctc  | caaacatgta  | gcagtaatga  | caaaatctca |
| 27721 | agttatatgt  | atactttttat | attatctacc  | tactaaaaaa  | acagaaaaat  | gctcaaacgt |
| 27781 | agcgggtccaa | aaaaattaaa  | gtctataata  | gaaaactatg  | cattaaaaatg | catgaaaaat |
| 27841 | aaaatttagca | aaaatgaaat  | acgtcttatt  | ttaaactggc  | gaaatatagt  | agggaaagaa |
| 27901 | atagcagagt  | gtacaaaacc  | gaaaaagatc  | tcatatgcac  | agaatataaa  | ttcgggtgtg |
| 27961 | ttgcatctgg  | tagtaacaaa  | tggcagcaaa  | gcattggaaa  | ttcagcatat  | gatttctctt |
| 28021 | ataatagaaa  | aaattacgat  | atrtttttggc | tataaagcag  | tatatggtat  | aaaaattaa  |
| 28081 | caagagagta  | ttgactatrt  | gactatataa  | ggtaatctaa  | gtacatagaa  | taatttggt  |

|       |             |             |             |             |             |             |
|-------|-------------|-------------|-------------|-------------|-------------|-------------|
| 28141 | tattgaagtg  | agtagagttt  | gtgaattaac  | aatagaaaa   | aatctttttg  | gtaataaggt  |
| 28201 | atcacattca  | aatcgtaaaa  | caaagcgtac  | ctttctttta  | aattttacata | aggttacgtt  |
| 28261 | gacaagtgat  | atattgaata  | aaaagtttag  | atttcgtgtg  | gcaacaagaa  | ctttgagaac  |
| 28321 | tatagattac  | aaaggtgatt  | tagatgcttt  | tttgctcaac  | acaagaacga  | ttaaactaag  |
| 28381 | tgagaaagcg  | cagaagataa  | aaagaagggt  | gaaaaaagtt  | ttagtaaagc  | aagaggtaga  |
| 28441 | gttagcagtt  | tcagatgcat  | agcaaacctc  | aatggctcag  | agcaaaagct  | ccgaccggtg  |
| 28501 | aagtgttcaa  | tgagacctta  | aacatcgtta  | aactgcataa  | cttgcataca  | gtgtgcgaag  |
| 28561 | aggctgcatg  | tccaaacatt  | ggtgaatggt  | ggaataaacg  | tcatgctact  | gtgatgattc  |
| 28621 | ttggttctgt  | ttgcaactcg  | gcttggtgat  | tttgcaacgt  | tgcaactggc  | attcctgata  |
| 28681 | aactagatcc  | tcatgaacca  | gaaaatttag  | caaaagcaat  | aaaaaagtta  | aacttaaagc  |
| 28741 | atgttggttat | tacttccggt  | gatcgtgatg  | atttaccaga  | tggtggcgca  | aatcagttta  |
| 28801 | tacagtgcac  | agaagaaatt  | agaaagataa  | cttcagaaac  | aacaatagag  | attttaactc  |
| 28861 | ctgatttttt  | aaataagaaa  | ggagcatttg  | aagcaatcgc  | tgttgcatca  | cctgatgtct  |
| 28921 | ataaccacaa  | tattgaaaca  | gtgccgagat  | tgtatgcaaa  | aataagacca  | cgaactcgct  |
| 28981 | attttcattc  | actatattta  | ctgaagatgg  | taaagcagat  | taattctaaa  | gttttcacaa  |
| 29041 | agtcagggct  | tatggttggt  | cttgagaaaa  | caaaagagga  | aatacttcag  | gttatggacg  |
| 29101 | atttgcgcag  | tgctgaggtt  | gattttatta  | caattggtca  | atatctacaa  | ccaactccaa  |
| 29161 | aacatgcaaa  | acttgatagg  | tatgttacct  | cagaggaatt  | tgagcattat  | aaatatatcg  |
| 29221 | cttactccaa  | agggttccta  | gtgggttgcac | caagcccact  | aactcgggtc  | tcataccacg  |
| 29281 | ctgaagaaga  | ttttaacagg  | ctcaaggcct  | gtcgttgaca  | tttgtgttaa  | ttcaaattaa  |
| 29341 | tttttactaa  | ttataaagga  | gtttttacgt  | aatgtctact  | ataaaaaatcg | agaagaaatc  |
| 29401 | acaattagtt  | aaagaggtat  | tcgattccgt  | ggcaagtcgc  | tacgacacca  | tgaatgatat  |
| 29461 | aatgagcctc  | ggaatgcaca  | gattatggaa  | agataagatg  | gtaaataagt  | tgcattttac  |
| 29521 | aaaaaactct  | aagggttttag | atgttgctgg  | aggaactgga  | gatatagcaa  | taagagtagt  |
| 29581 | aagaaaagag  | ccaagtgcata | aggttacagt  | atgcgatata  | aatcaaaaaca | tgctaaacag  |
| 29641 | aggacgtgat  | aaagctataa  | attcaaacca  | aattaatttt  | gattgggtat  | gtgcaagtgc  |
| 29701 | agaaagttta  | ccatttgaag  | actccgaatt  | tgattattgc  | acaatagctt  | ttggcattcg  |
| 29761 | aaacgtttct  | gaccgcaaga  | aggcttttaa  | tgaggcgcac  | agggtattaa  | aaccacatgg  |
| 29821 | aaaattttatc | tgcttagaat  | ttgcccctat  | gcactatcaa  | aatgagatat  | ttaccaaaact |
| 29881 | ttatgactta  | tattcattta  | aagtaattcc  | taaaattggc  | agcatagttg  | ctaaagacaa  |
| 29941 | gagttccttat | gaatattttag | tgaggagcat  | tagagagttt  | ccaactcagg  | ctgattttta  |
| 30001 | aatggaaatt  | gaagaggttag | gctttaagaa  | tggtgagttt  | cataatatga  | gctatggaat  |
| 30061 | agtggcatta  | cacattggaa  | caaaatgaat  | attaaactct  | ggtatagaac  | gctggattac  |
| 30121 | tatctcatcc  | ttccagtgtt  | ttttttgctc  | actataagct  | tcatttcttg  | ttattcagca  |
| 30181 | agccctgtaa  | ttgcgcagcg  | tctttcttta  | ccacaagatt  | atttttatacg | gcgtcacaca  |
| 30241 | atttatatag  | tcctgtcact  | aattaccttg  | gtgacatttt  | cttttctcaa  | cacaagaact  |
| 30301 | atacttaacc  | tctcgttcgc  | aggtttcatt  | ttatttacta  | ttctagtagc  | aattgcgata  |
| 30361 | atacttggtg  | tagaggtaaa  | aggtgcgaaa  | cgatgggttac | atattgtcaa  | aatttcagtt  |
| 30421 | caaccatctg  | agtttgtaag  | gccatttttt  | tctgttggtg  | tagctagtag  | cttgccagc   |
| 30481 | gaaatgaagt  | ttaaaataca  | catatcaatc  | ataatatttc  | tgtaggtttt  | tgtgttggtg  |
| 30541 | cttttgcaac  | ctgatttcag  | tatgtctatg  | cttttaacat  | attcttttat  | tggtcaaatg  |
| 30601 | tttattgcat  | gtataaccatt | tttatacttt  | ctatgcataa  | taggaatggc  | cacaactgga  |
| 30661 | actacaatag  | cttacttatg  | cctcccacat  | ataaagcaaa  | ggattttaca  | ttttgtcttt  |
| 30721 | tttacgcagc  | gcgataactt  | tcaagtcaca  | aatcatttag  | aagcattcaa  | aagagggtcaa |
| 30781 | ttaactgggg  | ttggacctgg  | tgaaggtagc  | gtaaaagcct  | ctcttcctga  | ttgtcataca  |
| 30841 | gattttgtgt  | tttctgtttt  | agcagaagaa  | tttggtttga  | ttacgtgctt  | agccacattg  |
| 30901 | atgttatttg  | gcacatcttc  | cgcccgtttg  | ctttacgttg  | catataggga  | aatgaatta   |
| 30961 | tttaactctgt | tagtgattct  | cggatctctc  | atgcaattca  | tcacacaatt  | cataataaac  |
| 31021 | ataggggtaa  | cattgaggtg  | ttttccaacc  | accggcataa  | ccctgcggtt  | acttagctat  |
| 31081 | ggtggttctt  | ctcttttatc  | ttcgagcatc  | gcacttggca  | taatgctgtc  | ttttagtaga  |
| 31141 | aatcaagcta  | ttgcattaaa  | gtttcgtgag  | cgatattatgc | ttggaaggta  | tatggactaa  |
| 31201 | acttgtaccg  | ctcacaaact  | ttattgggtat | ccctccaaaa  | tggttatctg  | ttcagatgag  |
| 31261 | tggcaagaga  | tattatgaaa  | tctgaaagag  | ttatgtggaa  | atttttcaga  | aaatattcca  |
| 31321 | ctgacatgct  | gaacaacaaa  | tacatcacta  | tgctgtttat  | cgcaaaaact  | tatatttttc  |
| 31381 | gtaaccattc  | acacttaatt  | ctgcaattct  | ttgatctcac  | tcataagaaag | accagtagtt  |
| 31441 | tgagctataa  | tattaaaaaga | aacacctgct  | ttaagtagat  | tctttgcgac  | ttcaatttcc  |
| 31501 | ctctcttttc  | taccttcctc  | tttagcaaga  | tcaagtctgt  | attcaagaat  | ggcttcttct  |
| 31561 | ttgcgcagat  | ccattattct  | ttcttcataa  | gctatttagat | ctttttcatt  | ccagtgaaac  |
| 31621 | ttatctaatt  | catcatatgc  | tagcttttatt | attggtgatt  | tttccgcaat  | ttttctgaga  |
| 31681 | tcttcgtccg  | ttgtttcatc  | tgcataattta | aaaaagaaac  | accacctttc  | tattgtactt  |

31741 tctagctgct ctactttact ttttgaaaat ttgggcaatt ctataaagat aaattgaaaa  
31801 tctttt

//

LOCUS JAQZAU010000099 1112 bp dna linear ENV 17-MAR-2023  
DEFINITION MAG: Wolbachia pipientis isolate wEsol contig\_50097, whole genome  
shotgun sequence.  
ACCESSION JAQZAU010000099 JAQZAU010000000  
VERSION JAQZAU010000099.1  
DBLINK BioProject: PRJNA929258  
BioSample: SAMN33142973  
KEYWORDS WGS; ENV; Metagenome Assembled Genome; MAG.  
SOURCE Wolbachia pipientis (insect metagenome)  
ORGANISM Wolbachia pipientis  
Bacteria; Pseudomonadota; Alphaproteobacteria; Rickettsiales;  
Anaplasmataceae; Wolbachieae; Wolbachia.  
REFERENCE 1 (bases 1 to 1112)  
AUTHORS Fiutek,N., Couger,B.M., Roy,S., de la Torre,J.R. and Connor,E.F.  
TITLE Genomic assessment of the contribution of the Wolbachia  
endosymbiont of Eurosta solidaginis to gall-induction  
JOURNAL International Journal Molecular Sciences  
REFERENCE 2 (bases 1 to 1112)  
AUTHORS Fiutek,N., Couger,B.M., Roy,S., de la Torre,J.R. and Connor,E.F.  
TITLE Direct Submission  
JOURNAL Submitted (10-FEB-2023) Biology, San Francisco State University,  
1600 Holloway Ave, San Francisco, CA 94132, USA  
COMMENT ##Genome-Assembly-Data-START##  
Assembly Date :: JUN-2019  
Assembly Method :: FLYE v. 06-2019  
Genome Representation :: Full  
Expected Final Version :: Yes  
Genome Coverage :: 100.0x  
Sequencing Technology :: Illumina HiSeq; PacBio Sequel  
##Genome-Assembly-Data-END##  
FEATURES Location/Qualifiers  
source 1..1112  
/organism="Wolbachia pipientis"  
/mol\_type="genomic DNA"  
/submitter\_seqid="contig\_50097"  
/isolate="wEsol"  
/isolation\_source="galls on Solidago altissima"  
/host="Eurosta solidaginis MN-2018-EFC"  
/db\_xref="taxon:955"  
/environmental\_sample  
/country="USA: Cowling Arboretum, Carleton College,  
Northfield, MN"  
/lat\_lon="44.48 N 93.13 W"  
/altitude="280 m"  
/collection\_date="2018-11"  
/metagenome\_source="insect metagenome"  
/note="metagenomic"  
gene 115..444  
/locus\_tag="wEsol\_01136"  
CDS 115..444  
/locus\_tag="wEsol\_01136"  
/codon\_start=1  
/transl\_table=11  
/pfam="DDE\_Tnp\_1\_5"  
/fullproduct="qcoverage 100 , hcoverage 100 , similarity  
99.1 , identity 99.1 , eval 1.02e-73 , alnlength 109 ,  
Bacteria , Proteobacteria , WP\_141456678.1 MULTISPECIES:"

```

transposase [unclassified Wolbachia]"
/translation="MPQKMRVSNCH EY NKFLQERGSIFCYINDAIENWYENC PKMQGG
NYIYSDKVVLVRIIVSFFRIGLRQTVGFIKGYLQQIGRDLAVISYSQASRRFKKLN I
KINDCRK"
/product="transposase"
/besthit="qcoverage 100 , hcoverage 100 , similarity 99.1
, identity 99.1 , evaluate 1.02e-73 , alnlength 109 ,
Bacteria , Proteobacteria , WP_141456678.1 MULTISPECIES:
transposase [unclassified Wolbachia]"
gene 428..1063
/locus_tag="wEsol_01137"
CDS 428..1063
/locus_tag="wEsol_01137"
/codon_start=1
/transl_table=11
/pfam="DDE_Tnp_1 rve DDE_Tnp_1_2"
/fullproduct="qcoverage 100 , hcoverage 100 , similarity
100 , identity 100 , evaluate 2.85e-152 , alnlength 211 ,
Bacteria , Proteobacteria , WP_081600764.1 MULTISPECIES:
transposase [unclassified Wolbachia]"
/translation="MIAENNMEDIEIAIDSTGISIYNNTPGH SKENSTD RKYRGYEQT
RKLHVMLNINNKKAI AVKYSNGVYSDHYGACDLLKEVDFQHA I KALYADRACDRHKFY
KLCNEYDIKTKIPPINNA AEHP EIDYMSDRNAAIRLIKLYGEDGMKEWKKEVNYGKRS
YIEGFFSRLKQIFGFSFRNKSEINREKELLIKCYLLNKFTDIGMAKFEIVT"
/product="transposase"
/besthit="qcoverage 100 , hcoverage 100 , similarity 100
, identity 100 , evaluate 2.85e-152 , alnlength 211 ,
Bacteria , Proteobacteria , WP_081600764.1 MULTISPECIES:
transposase [unclassified Wolbachia]"

```

#### ORIGIN

```

1 acttaataaa attcctggat tccagtgggc tttgttgcat cgctcaagtg aaaagaactg
61 gcagttactg acaaaattca ttataaatag ccatTTaact gttgaagaaa aaatatgcc a
121 caaaaaatga gagtcagtaa ctgccatgaa tataacaaat ttctccaaga aagaggaagc
181 atTTTTtgtt atatcaatga cgccatagaa aattggtacg agaattgtcc aaaaatgcag
241 ggcggaact atatttatag tgataaagtt gtgatttttg tgcggtataat cgtcagtttc
301 tttagaattg gtttaagaca aacagtcggg ttataaaaag ggtattttgca acaaatagga
361 agagattttg cagttatcag ctattcacaa gcatcaagaa ggtttaagaa acttaattt
421 aagataaatg attgcagaaa ataatatgga agatatcgaa attgctatag acagtacagg
481 aattagtata tacaacaaca ctcttggtca cagcaaggaa aatagcactg acagaaaata
541 tcgtggctat gagcaaacga gaaaattgca cgtaatgttg aatataaaca acaaaaaagc
601 catagctgta aaatacagta acggtgtcta ctctgatcac tatggagctt gtgatttgct
661 aaaagaagtt gattttcagc atgccataaa agcactatat gcagatagag catgtgatag
721 gcacaagttt tataagttgt gtaacgaata tgatataaag acaaaaattc caccaataaa
781 caatgcggca gaacatccag aaatagatta tatgtctgac aggaatgctg ctattaggtt
841 aataaaatta tacggtgaag atggcatgaa agaattgaaa aaagaagtaa attatgggaa
901 aagatcttat attgaagggt ttttctcaag attaaagcaa atattcgga ttagttttag
961 gaataaatct gagataaatc gagaaaaaga actgctaatac aaatgctatt tgcttaataa
1021 attcactgat attggtatg ctaaatttga gatagttaca tgaatttacc ataaatcacc
1081 atctcataaa gtgtgatgca acaagccca ct

```

//

```

LOCUS      JAQZAU010000100      10271 bp      dna      linear      ENV 17-MAR-2023
DEFINITION MAG: Wolbachia pipientis isolate wEsol contig_50425, whole genome
            shotgun sequence.
ACCESSION  JAQZAU010000100  JAQZAU010000000
VERSION    JAQZAU010000100.1
DBLINK     BioProject: PRJNA929258
            BioSample: SAMN33142973
KEYWORDS   WGS; ENV; Metagenome Assembled Genome; MAG.
SOURCE     Wolbachia pipientis (insect metagenome)
ORGANISM   Wolbachia pipientis

```

Bacteria; Pseudomonadota; Alphaproteobacteria; Rickettsiales; Anaplasmataceae; Wolbachieae; Wolbachia.

REFERENCE 1 (bases 1 to 10271)

AUTHORS Fiutek,N., Couger,B.M., Roy,S., de la Torre,J.R. and Connor,E.F.

TITLE Genomic assessment of the contribution of the Wolbachia endosymbiont of Eurosta solidaginis to gall-induction

JOURNAL International Journal Molecular Sciences

REFERENCE 2 (bases 1 to 10271)

AUTHORS Fiutek,N., Couger,B.M., Roy,S., de la Torre,J.R. and Connor,E.F.

TITLE Direct Submission

JOURNAL Submitted (10-FEB-2023) Biology, San Francisco State University, 1600 Holloway Ave, San Francisco, CA 94132, USA

COMMENT ##Genome-Assembly-Data-START##

Assembly Date :: JUN-2019

Assembly Method :: FLYE v. 06-2019

Genome Representation :: Full

Expected Final Version :: Yes

Genome Coverage :: 100.0x

Sequencing Technology :: Illumina HiSeq; PacBio Sequel

##Genome-Assembly-Data-END##

FEATURES

source 1..10271

/organism="Wolbachia pipientis"

/mol\_type="genomic DNA"

/submitter\_seqid="contig\_50425"

/isolate="wEsol"

/isolation\_source="galls on Solidago altissima"

/host="Eurosta solidaginis MN-2018-EFC"

/db\_xref="taxon:955"

/environmental\_sample

/country="USA: Cowling Arboretum, Carleton College, Northfield, MN"

/lat\_lon="44.48 N 93.13 W"

/altitude="280 m"

/collection\_date="2018-11"

/metagenome\_source="insect metagenome"

/note="metagenomic"

gene 66..347

/locus\_tag="wEsol\_01138"

CDS 66..347

/locus\_tag="wEsol\_01138"

/codon\_start=1

/transl\_table=11

/fullproduct="qcoverage 100 , hcoverage 100 , similarity 98.9 , identity 98.9 , evalue 1.51e-63 , alnlength 93 , Bacteria , Proteobacteria , CDR78524.1 hypothetical protein WPAU\_0128 [Wolbachia endosymbiont of Drosophila simulans wAu]"

/translation="MLRWHIEECYKRLKVGAELENFSGEAVLQEFWANLVMCNILSLH MCDAQGPWNPDQITEYRLNFSVLFGVMRQKLYQVLIAPKNFQALFKYTR"

/product="hypothetical protein"

/besthit="qcoverage 100 , hcoverage 100 , similarity 98.9 , identity 98.9 , evalue 1.51e-63 , alnlength 93 , Bacteria , Proteobacteria , CDR78524.1 hypothetical protein WPAU\_0128 [Wolbachia endosymbiont of Drosophila simulans wAu]"

gene complement(614..1864)

/locus\_tag="wEsol\_01139"

CDS complement(614..1864)

/locus\_tag="wEsol\_01139"

```

/codon_start=1
/transl_table=11
/fullproduct="qcoverage 100 , hcoverage 100 , similarity
100 , identity 100 , evalue 3.59e-299 , alnlength 416 ,
Bacteria;Eukaryota , Proteobacteria;Arthropoda ,
WP_015589409.1 MULTISPECIES: citrate synthase
[Wolbachia]"
/cog="GltA COG0372 390 Citrate synthase"
/pfam="Citrate_synt"
/tigr="TIGR01798 cit_synt_I 412 citrate (Si)-synthase"
/product="citrate synthase"
/translation="MDKKVLELSNGLKIELPVLSGTTGPDVLNIKDLYKMTGLFTYD
PGFVSTASCSSTITFIDGDEGVLYKRGHNIADLAENNNFTAVIYLLLYGELPSSEQHK
KFLKIQESSKVSEQVTNVIKAFPKTAHPMSILVACFASLSASYHEKHGNNVNGEDLD
FGISAIAQVSTIIAMIYRHINNQEFINANNELSYSENFLKMIFGDAVDNDKSALFAKA
LDKIFTLHADHEQNASTAAVRLVGSAGSNLFASLSAGVATLWGPAGHGANEAVINMLK
EIEQSGDIDKFIEKAKDDKDPFKLMGFGRVYKKNYDPRARILKGACHEVLSKLEQNNE
LLKIAKKLEEIALKDEYFIVRKLYPNVDFYSGIIMNAIDIPSNMFTPIFALARTTGWV
TQWYEMINDKETKICRPRQLYFGK"
/besthit="qcoverage 100 , hcoverage 100 , similarity 100
, identity 100 , evalue 3.59e-299 , alnlength 416 ,
Bacteria;Eukaryota , Proteobacteria;Arthropoda ,
WP_015589409.1 MULTISPECIES: citrate synthase
[Wolbachia]"
gene complement(1945..2214)
/locus_tag="wEsol_01140"
CDS complement(1945..2214)
/locus_tag="wEsol_01140"
/codon_start=1
/transl_table=11
/fullproduct="qcoverage 100 , hcoverage 100 , similarity
100 , identity 100 , evalue 1.24e-49 , alnlength 89 ,
Bacteria , Proteobacteria , WP_012673338.1 MULTISPECIES:
30S ribosomal protein S20 [Wolbachia]"
/cog="RpsT COG0268 88 Ribosomal protein S20"
/pfam="Ribosomal_S20p"
/tigr="TIGR00029 S20 87 ribosomal protein S20"
/product="30S ribosomal
protein S20"
/translation="MANHKSAKKMIKVIKRTLINKMRKSKTRTSIRKLVDIIKSGDK
ENVVLAFRNAESNLHKCVNKGVIHRNTAARKISRLNAKVKALMTA"
/besthit="qcoverage 100 , hcoverage 100 , similarity 100
, identity 100 , evalue 1.24e-49 , alnlength 89 ,
Bacteria , Proteobacteria , WP_012673338.1 MULTISPECIES:
30S ribosomal protein S20 [Wolbachia]"
gene complement(2266..2991)
/locus_tag="wEsol_01141"
CDS complement(2266..2991)
/locus_tag="wEsol_01141"
/codon_start=1
/transl_table=11
/fullproduct="qcoverage 100 , hcoverage 100 , similarity
100 , identity 100 , evalue 7.09e-161 , alnlength 241 ,
Bacteria , Proteobacteria , WP_010963063.1 MULTISPECIES:
1-acyl-sn-glycerol-3-phosphate acyltransferase
[Wolbachia]"
/cog="PlsC COG0204 255 1-acyl-sn-glycerol-3-phosphate
acyltransferase"
/pfam="Acyltransferase Pfam-B_2529"
/product="

```

```

1-acyl-sn-glycerol-3-phosphate acyltransferase"
/translation="MISSLLFNFFLILWEVFYTFITLPVIFFFSECVITIFLVCSVRVV
LFMLRLLCGIKYEVGRGMENIPKQPFIIASKHQSPFETFIFILLFRKAVFILKRELKWI
PFIGLHLIALKMIFINRSDGISSIRHIIKLAKMRIKENRSIIIFPEGTRTTINQNIKY
QPGIAALYSVLSVPVLPVALNTGLFWPKSILSLRKNPGKAVIEILPPIYPGLNKNEFL
QSLEKIIIEERSRLTIGKTDIAN"
/besthit="qcoverage 100 , hcoverage 100 , similarity 100
, identity 100 , evalue 7.09e-161 , alnlength 241 ,
Bacteria , Proteobacteria , WP_010963063.1 MULTISPECIES:
1-acyl-sn-glycerol-3-phosphate acyltransferase
[Wolbachia]"
gene complement(3047..4033)
/locus_tag="wEsol_01142"
CDS complement(3047..4033)
/locus_tag="wEsol_01142"
/codon_start=1
/transl_table=11
/fullproduct="qcoverage 100 , hcoverage 100 , similarity
100 , identity 100 , evalue 6.65e-230 , alnlength 328 ,
Bacteria , Proteobacteria , WP_151808093.1 MULTISPECIES:
tyrosine recombinase [Wolbachia]"
/cog="XerD COG4974 300 Site-specific recombinase XerD"
/pfam="Phage_integr_N Phage_integr_N2 Pfam-B_15351
Phage_integrase Pfam-B_3560 Integrase_1 Pfam-B_6490"
/tigr="TIGR02225 recomb_XerD 290 tyrosine recombinase
XerD"
/product="tyrosine
recombinase"
/translation="MKNKQSQNKKENLYITYYIDALASERSAAQNTLESYRSDLHQFE
EFLLES GTTLVGVNKTNIKDYVKS LCTQKKYKSSSISRKISAMKNFYKCLFNDGIIDF
NPAPANDAELKNPKVSRPLPKYLSVEEIFFLLMDTVRKSASESNKEISSKRLCAILDIL
YSSGMRVSELISMKLCEVSHLINSNNKECYIIIGKSGRERQILFNEQALQSLRNYLS
VRDNLISKEKESDWLFPGDKPNKPITRQRVGQLMKELARKCNIDENKISPHVIRHSFA
THLLNSGANIVLIQKVLGHTNLSTTQIYTHIANEKLKDKLADSHPITQMINN"
/besthit="qcoverage 100 , hcoverage 100 , similarity 100
, identity 100 , evalue 6.65e-230 , alnlength 328 ,
Bacteria , Proteobacteria , WP_151808093.1 MULTISPECIES:
tyrosine recombinase [Wolbachia]"
gene complement(4023..4193)
/locus_tag="wEsol_01143"
CDS complement(4023..4193)
/locus_tag="wEsol_01143"
/codon_start=1
/transl_table=11
/fullproduct="qcoverage 100 , hcoverage 100 , similarity
100 , identity 100 , evalue 6.78e-28 , alnlength 56 ,
Bacteria , Proteobacteria , WP_007549057.1 MULTISPECIES:
hypothetical protein [Wolbachia]"
/translation="MIRVRLNLRKRLKQKFVMTLLINALFVSYFLIRNTGNTSNQII
AKEINIGTDNEK"
/product="hypothetical protein"
/besthit="qcoverage 100 , hcoverage 100 , similarity 100
, identity 100 , evalue 6.78e-28 , alnlength 56 ,
Bacteria , Proteobacteria , WP_007549057.1 MULTISPECIES:
hypothetical protein [Wolbachia]"
gene complement(4399..5034)
/locus_tag="wEsol_01144"
CDS complement(4399..5034)
/locus_tag="wEsol_01144"
/codon_start=1

```

```

/translation=11
/fullproduct="qcoverage 100 , hcoverage 100 , similarity
100 , identity 100 , evalue 6.66e-142 , alnlength 211 ,
Bacteria , Proteobacteria , WP_213863629.1 chorismate
synthase [Wolbachia endosymbiont of Ceratitidis capitata]"
/cog="DnaA COG0593 408 ATPase involved in DNA replication
initiation"
/pfam="AAA_14 Bac_DnaA"
/tigr="TIGR03420 DnaA_homol_Hda 226 DnaA regulatory
inactivator Hda"
/product="chorismate synthase"
/translation="MQLNLFNNNQADYSRQNYIILDENKHVYNSVVDLSWKCLILFG
PKSSGKTHLAHIWQSINDAIFINNVNFVSEIRYSDAFILEDVQNIKDEAMLLHCYNM
KENDKRLLITSSISPKKLNFKLRDLSSRILSTISVKILPASEELLRIMLIKRFSDKQL
KIDLKVINYILARIERSFYSIDKMIEKIDNESIGSNVTVPFISTLLKKDAI"
/besthit="qcoverage 100 , hcoverage 100 , similarity 100
, identity 100 , evalue 6.66e-142 , alnlength 211 ,
Bacteria , Proteobacteria , WP_213863629.1 chorismate
synthase [Wolbachia endosymbiont of Ceratitidis capitata]"
gene complement(5164..6228)
/locus_tag="wEsol_01145"
CDS complement(5164..6228)
/locus_tag="wEsol_01145"
/codon_start=1
/translation=11
/fullproduct="qcoverage 100 , hcoverage 100 , similarity
100 , identity 100 , evalue 1.37e-226 , alnlength 354 ,
Bacteria , Proteobacteria , WP_155969287.1 MULTISPECIES:
AI-2E family transporter [Wolbachia]"
/cog="yhhT COG0628 355 Predicted permease, member of the
PurR regulon"
/pfam="UPF0118"
/tigr="TIGR02872 spore_ytvI 341 sporulation integral
membrane protein YtvI"
/product="AI-2E family
transporter"
/translation="MQKRHITICFILLFIIGMLFLMRPMIFPCLISIIAYLFNPLV
KFEKYRIPRSCSVIFIIILLIAFILVITFVLPPIIYVQITSILNFLVSKVPSLKLQVI
PSVLEFLNMKIEDSLFDHLSKNLAENYSNYVSFYFMNALDIASNFIIQVLSSSFNTVSL
MVITPVVFFYILRDWPLIIEKASKLIPIPYRGKIADYFSKVDFIISNYLKGQVNVCI
MMVFYSVSLSIIGLEHSIVIGILSGMLTFIPYVGPLYTIIGFLSAITQFSGWFESAA
VLLLFGVGQLIDSNILVPLLLIGKKVHIHPTVILGITICASYFGFIGILLFIPIIAMF
NVSVEYAINKYFKSELYKNG"
/besthit="qcoverage 100 , hcoverage 100 , similarity 100
, identity 100 , evalue 1.37e-226 , alnlength 354 ,
Bacteria , Proteobacteria , WP_155969287.1 MULTISPECIES:
AI-2E family transporter [Wolbachia]"
gene 6492..7631
/locus_tag="wEsol_01146"
CDS 6492..7631
/locus_tag="wEsol_01146"
/codon_start=1
/translation=11
/pfam="IspD NTP_transf_3 YgbB"
/fullproduct="qcoverage 98.4168865435356 , hcoverage
93.9546599496222 , similarity 100 , identity 99.7 ,
evalue 2.22e-265 , alnlength 373 , Bacteria ,
Proteobacteria , WP_077188604.1 bifunctional
2-C-methyl-D-erythritol 4-phosphate
cytidyltransferase/2-C-methyl-D-erythritol

```

2,4-cyclodiphosphate synthase [Wolbachia pipientis]"  
 /translation="MCAKKYKIAALIVAAGVGSRCNSTIPKQYIKLAGKSVLFHTIKR  
 FLANQYIDYIRIAINRDHESFYEKAISLITDTKLLSPVYGGENRQSSVKLGLESLOKV  
 NPDFVVIHDACRPFVSDVLIDNLVESMINDQYTGVPVPAIEVEDTMSLVNSNFIESTIS  
 RGKLRAIQTPQIFNFKELLSCHQSVKEFTDDSSLMVEHKKHVAIIKGEKSNFKLTKE  
 DINMAKLLFEPPKFRVAGYDIHKFIKVQNGAESFIKICGVKIEHNMAIEAHS DGDVA  
 IHAIVDAILGALGCGDIGEHFPPSSSEWKDCNSSHFLDFAAKKAKEKGYSVSNLDITI  
 VCEEPKISPYKVMKKFISKALEIDDEFVNIKATTAEKIRLYWKK"  
 /product="bifunctional  
 2-C-methyl-D-erythritol 4-phosphate  
 cytidyltransferase/2-C-methyl-D-erythritol  
 2,4-cyclodiphosphate synthase"  
 /besthit="qcoverage 98.4168865435356 , hcoverage  
 93.9546599496222 , similarity 100 , identity 99.7 ,  
 evalue 2.22e-265 , alnlength 373 , Bacteria ,  
 Proteobacteria , WP\_077188604.1 bifunctional  
 2-C-methyl-D-erythritol 4-phosphate  
 cytidyltransferase/2-C-methyl-D-erythritol  
 2,4-cyclodiphosphate synthase [Wolbachia pipientis]"

gene 7646..7888  
 /locus\_tag="wEsol\_01147"

CDS 7646..7888  
 /locus\_tag="wEsol\_01147"  
 /codon\_start=1  
 /transl\_table=11  
 /fullproduct="qcoverage 80 , hcoverage 92.7536231884058 ,  
 similarity 93.8 , identity 90.6 , evalue 1.75e-34 ,  
 alnlength 64 , Bacteria , Proteobacteria , QDH18189.1  
 hypothetical protein wCauA\_00480 [Wolbachia endosymbiont  
 of Carposina sasakii]"  
 /translation="MLLCYCIQTFIGNRNEKTYLTTLRQPPYHETEAIYLSSLYRLND  
 KKTHVSGVSCLI FCTMCTLCLYQISGFLPIQAEMRL"  
 /product="hypothetical protein"  
 /besthit="qcoverage 80 , hcoverage 92.7536231884058 ,  
 similarity 93.8 , identity 90.6 , evalue 1.75e-34 ,  
 alnlength 64 , Bacteria , Proteobacteria , QDH18189.1  
 hypothetical protein wCauA\_00480 [Wolbachia endosymbiont  
 of Carposina sasakii]"

gene complement(8655..8837)  
 /locus\_tag="wEsol\_01148"

CDS complement(8655..8837)  
 /locus\_tag="wEsol\_01148"  
 /codon\_start=1  
 /transl\_table=11  
 /product="hypothetical protein"  
 /tigr="TIGR01161 purK 362 phosphoribosylaminoimidazole  
 carboxylase, ATPase subunit"  
 /translation="MRVPMQEVVLRFPCKMTKNIIGNDIYDSHKYLSNEKASLTIYGKK  
 EVRDKRKMGHVNIDLS"  
 /cog="PurK COG0026 375 Phosphoribosylaminoimidazole  
 carboxylase (NCAIR synthetase)"  
 /besthit="qcoverage 96.6666666666667 , hcoverage  
 28.1553398058252 , similarity 98.3 , identity 94.8 ,  
 evalue 3.52e-31 , alnlength 58 , Eukaryota , Arthropoda ,  
 GFR24199.1 n5-carboxyaminoimidazole ribonucleotide  
 synthase [Trichonephila clavata]"

gene complement(8813..9334)  
 /locus\_tag="wEsol\_01149"

CDS complement(8813..9334)  
 /locus\_tag="wEsol\_01149"

```

/codon_start=1
/transl_table=11
/product="hypothetical protein"
/pfam="ATP-grasp CPSase_L_D2 ATP-grasp_4 Dala_Dala_lig_C"
/tigr="TIGR01161 purK 362 phosphoribosylaminoimidazole
carboxylase, ATPase subunit"
/translation="MSYWKSSRAFGYPTRLKTTEMGYDGKGQYVLENDSEVKQFASFD
WNTEYILEASVDLLKEVSIVVARDKNGKVAFFPIAENYHVDGILDTSTVPAKIDSKLT
QEVQRAAKKIANALDVIGILAIEFFVTKDNELLVNELAPRPHNSCHWSLDACNVSQFE
QLVRIICGYLCRK"
/cog="PurK COG0026 375 Phosphoribosylaminoimidazole
carboxylase (NCAIR synthetase)"
/besthit="qcoverage 94.7976878612717 , hcoverage
46.3276836158192 , similarity 100 , identity 100 , evaluate
9.83e-111 , alnlength 164 , Bacteria , Proteobacteria ,
WP_010082017.1 MULTISPECIES: 5-(carboxyamino)imidazole
ribonucleotide synthase [Wolbachia]"
gene complement(9312..9719)
/locus_tag="wEsol_01150"
CDS complement(9312..9719)
/locus_tag="wEsol_01150"
/codon_start=1
/transl_table=11
/product="hypothetical protein"
/pfam="2-Hacid_dh_C"
/tigr="TIGR01161 purK 362 phosphoribosylaminoimidazole
carboxylase, ATPase subunit"
/translation="MNEPDALSKKVIGIIGGGQLGKMTAIAATKLGQKTHVFASAKDD
PACSVADDFTIADFSDDKKALESFAQSVDLVTIESENIPCSAINIDVNFYPGKKALHIA
QNRLREKDFIRSLSIKTAEYKSIQYNELLEKQ"
/cog="PurK COG0026 375 Phosphoribosylaminoimidazole
carboxylase (NCAIR synthetase)"
/besthit="qcoverage 98.5185185185185 , hcoverage
37.5706214689266 , similarity 100 , identity 100 , evaluate
2.23e-81 , alnlength 133 , Bacteria , Proteobacteria ,
WP_015589405.1 MULTISPECIES: 5-(carboxyamino)imidazole
ribonucleotide synthase [unclassified Wolbachia]"
gene 9816..10220
/locus_tag="wEsol_01151"
CDS 9816..10220
/locus_tag="wEsol_01151"
/codon_start=1
/transl_table=11
/fullproduct="qcoverage 100 , hcoverage 100 , similarity
100 , identity 100 , evaluate 3.23e-91 , alnlength 134 ,
Bacteria , Proteobacteria , WP_015589404.1 Co2+/Mg2+
efflux protein ApaG [Wolbachia endosymbiont of Drosophila
sechellia]"
/cog="ApaG COG2967 126 Uncharacterized protein affecting
Mg2+/Co2+ transport"
/pfam="DUF525"
/product="Co2+/Mg2+ efflux protein ApaG"
/translation="MILEYTLTTNFVEVTVLPYIEEQSIPYENCYVWMYNVGIKKNKS
QSTIQLLSRHWQIIDIYKGVNEIAGVGVIGEQPVIKSGEVFKYTSPTYLNAPSGIMQG
KYEFLNEESIKIFEVMIPFSLDSPYVKTRPH"
/besthit="qcoverage 100 , hcoverage 100 , similarity 100
, identity 100 , evaluate 3.23e-91 , alnlength 134 ,
Bacteria , Proteobacteria , WP_015589404.1 Co2+/Mg2+
efflux protein ApaG [Wolbachia endosymbiont of Drosophila
sechellia]"

```

ORIGIN

```

1  tatagtgctg acattagcca actgagaaac agagtTTTTTg accgagactt tggagcaaag
61  cttatgtgtt aaggtggcac atagaggagt gctataaacg actcaaagta ggagcagagt
121 tagagaatTTt ttctggagag gctgtattac aagaatTTTTg ggcaaacttg gtcattgtgca
181 atatattatc gcttcatatg tgtgatgcac aagggccttg gaaccagat caaattactg
241 agtatcgTTt aaatTTTTtca gTTTTatttg gtgtaatgag gcagaaactc tatcaggtac
301 ttattgCGcc aaaaaacttt caagcccttt ttaagtatac gcgctaaagt taaaatccga
361 ccgggacagc cgcaataaag tagataagcc taaacgccat catgtcTTtta ggagagTTtg
421 ctaatgaaag ttcttaagtt gacgtcattg gctgaacgga tacggaatga caccatcctt
481 ttttctggat tccagactgg aatgacacct ctggacactt ccgtcgtaaa ggaaccagtg
541 tcagctactc ggatgacacc ttttttctac ttagtttggg ttatgcaaga agtctaataga
601 agtgaaaata aatttatTTa ccaaaataga gttgccttg tctacagatc ttagtttctt
661 tatcattttat catttcatac cactgagtaa cccaaccagt ggttcttgca agtgcaaaaa
721 taggcgtgaa catatttgag gggatatcaa tagcattcat tattatacct gagtaaaaaat
781 caacatttgg atataactta cgcacgataa aatattcatc ctttaaagct atttcttcaa
841 gTTTTtttgc aattttaagc agttcattat tttgttctag tttacttaga acctcatggc
901 aagcgctttt caatatacgc gcgcgCGgat cataatTTTT ataaacacga tgtccaaatc
961 ccatcaatTT aaatggatct ttatcatctt tagctTTTTc gatgaattta tctatatctc
1021 cactttgctc tatctctTTt agcatattta taactgcctc attagctcca ccatgtgctg
1081 gtcccaaag tgtagcaact cctgcagaga ggcttgcaa cagattagaa ccagccgatc
1141 ccaccaatct gacagccgCC gtagaagcat tctgttcatg atcagcatgg agagtaaata
1201 ttttatccag agcttttgca aaaagggcgc ttttatcatt atcaacagca tcgccaaata
1261 tcatctTTaa gaaatTTtca ctgtaactta attcattggt agcatttatg aattcctgat
1321 tgttgatatg cctataaatc attgcaataa ttgtggaaac ttgcgctatt gcagaaattc
1381 caaaatctag gtcttcacca ttgacattgt tgccatgctt ttcattgata gatgctgaca
1441 aacttgcaaa acatgcaact aagattgaca tagggtgagc agtttttgga aatgctTTaa
1501 ttacatttgt aacttgctct gatactttgg atgattcttg tattttgaga agaaatTTTT
1561 tgtgttgctc tgaactgggt aattcaccat agagcaataa ataaatcaca gcagtaaaat
1621 tattattctc tgccaaatca gctatattat gtcccctata tttagaact ccttcatctc
1681 catcaatgaa tgtaattgta gaagagcatg aagctgtaga aacaaacctt ggatcgtaag
1741 tgaataatcc tgtcatctta tataaatcct tgatatttaa cacatcagga cctgttgTtc
1801 cgcttaatac aggtagctcg attttttaac cattacttag ttctaatagc acttttttat
1861 ccatcactta agctacttaa attttataca gaatatacaa actgaggagt atatattaat
1921 acagttaaact ttacattaac cgtattaagc ggtcatcaat gcttttactt ttgcatttaa
1981 gcgacttatt ttacgcgcag cagtattcct atgaataaca cttttattca cacacttgTg
2041 taaattagat tcagcattcc gaaatgccag aacaacattt tctttgtcgc cagacttgat
2101 tatatcaacc aattttctaa tagaggtgCG agttttactt ttccgcatct tatttattaa
2161 agtgcgcttt gctattacct ttatcatttt tttagcactc ttatgatttg ccatatatta
2221 atacctaaaa tactgtactt ttcttttaat tataaagttt ttttgTTaat ttgcaatatc
2281 agtttttctt atggTTaatc tactgcttct ctcttcaata attttttcta aactttgcaa
2341 gaattcattt ttgtTTaacc caggatatat tgggggcaat atttctatta ctgcctttcc
2401 gggattcttt ctgagagaaa gtatgctttt tggccaaaac aaaccagtgt ttaaagcaac
2461 cggtaacaca ggaacagata atacgctata taaagcagca atacctgggt gatattttat
2521 attttggttt atagttgttc ttgtaccttc aggaaatatt attatgcttc tattttcttt
2581 tatacgcat tttgctagtt tgattatatg gcgtatagaa ctgataccat ctgaacggtt
2641 aataaaaaatc attttcagcg ctataagatg caaaccaatg aatggaatcc atttcaattc
2701 acgtttttaa ataaaaaccg cttttctaaa tagtagtata aaaataaatg tttcaaattg
2761 agattggTgt ttagatgcaa tgataaaagg ttgcttaggg atgttttcca ttccctcac
2821 ttcatattta atgccacata ataaacgcag catgaataat acaactctca ccgaacagac
2881 gaggaaaatg gttattacac actcagaaaa gaaaattaca gggagagtaa tgaaagtata
2941 gaatacctcc cataatataa gaaagaaatt aaacaataaa cttgaaatca caaactcaca
3001 taaatttatt taaatttaac ttattacaa attaaaaaca ataaatttaa ttattgatca
3061 tctgagtaat aggatgCGaa tcagctaatt tgcctTTtaa cttttcgTTa gcaatatgag
3121 tatatatTTg tgttgtagaa aggttagtat ggccaagaac tttctgtatc aacacaatat
3181 ttgctccgct atttagtaga tgggtagcaa aagaatgcct aatcacgtgt ggagagatct
3241 tattttcatc aatattgcat tttcttgcca actccttcat taattgaccg accctctgcc
3301 ttgtaattgg tttattaggt ttatcacctg ggaatagcca atcggattcc ttttctttag
3361 agatcagatt atcacgaact gataaataat ttctaaggct ctgcaatgct tgttcattaa
3421 aaagaatttg cctctctcta ccactttttc cttttattat tatatagcat tctttgttat
3481 tactgtttat taaatgtgac acttcacata atttcatact aattagttca gaaacacgca

```

|      |             |             |             |             |             |             |
|------|-------------|-------------|-------------|-------------|-------------|-------------|
| 3541 | ttccagaaga  | gtaaaggata  | tctaaaatcg  | cacatagcct  | tttactgctt  | atctctttat  |
| 3601 | tcgattcgct  | tgctgatttt  | ctcactgtgt  | ccattagcaa  | aaatatttct  | tcgacactta  |
| 3661 | aatacttagg  | caaaggacga  | gaaacttttg  | gattctttta  | ttcagcatca  | ttagccggcg  |
| 3721 | ctggattaaa  | atctattatt  | ccgtcattaa  | atagacactt  | gtaaaaat    | ttcatagcgg  |
| 3781 | atatttttct  | tgatatagag  | ctacttttat  | attttttttg  | tgtacataaa  | gatttcacat  |
| 3841 | aatctttta   | attggttttg  | tttacaccaa  | ccaaggtagt  | gccgctttcc  | aataaaaaat  |
| 3901 | cttcaaactg  | gtgtaaatcc  | gaacgataac  | tttccagagt  | attttgtgca  | gcggaacctt  |
| 3961 | ctgaagctaa  | agcatctatg  | taatattgta  | tgtaaagatt  | ttctttttta  | ttttgcgact  |
| 4021 | gtttattttt  | cattatcagt  | tcctatat    | atctcttttg  | ctataatttg  | attagaagtg  |
| 4081 | ttccctgtgt  | ttcttatgag  | aaaatatgag  | acaaataaag  | catttatcaa  | tagagtgaac  |
| 4141 | atcacaaact  | tttgctttta  | cctttttctt  | aaattttaat  | ttactcttat  | catagttaaa  |
| 4201 | ttataacgtt  | aaatctataa  | aaaacacctt  | ataaagttag  | ctctactata  | aatatagaat  |
| 4261 | acttcttagc  | tgtatctatc  | tatatattat  | ataacataac  | attgattata  | attctaacat  |
| 4321 | ggacagatag  | agattccaat  | tacgttagtg  | ttatgggtgt  | taataaat    | ttaatatata  |
| 4381 | cctttacaaa  | agaagaaatc  | aaatggcatc  | ttttttta    | aaagtgtcaa  | taaaaggaa   |
| 4441 | ggtcacattt  | gacctatag   | attcattatc  | tatcttttct  | atcattttat  | caatgctata  |
| 4501 | gaaagaacgt  | tctattcttg  | ctaaaatata  | attaatcact  | tttaaataca  | tttttaactg  |
| 4561 | tttatctgaa  | aatcgtttta  | ttagcataat  | tcttaataat  | tcctcgcttg  | caggcaaaat  |
| 4621 | ttttacgctg  | atagttgata  | atattcgaga  | acttaaatct  | cttagtttga  | agttaagctt  |
| 4681 | ttttggtgaa  | attgaagaag  | tgattagcag  | cctcttgctg  | ttttctttca  | tgtaattgta  |
| 4741 | acaatgtaat  | aacattgctt  | catctttaat  | gttttgtacg  | tcttctaaaa  | taaaagcatc  |
| 4801 | gctataccta  | atctcgctta  | cgaagtattt  | cacattgata  | aagattgcat  | cgtttattga  |
| 4861 | ttgccaaata  | tgagcaagat  | gagttttacc  | ggagctttta  | gggtccaaaa  | gaatcagaca  |
| 4921 | tttccaagat  | aaatcattaa  | ctaccgaatt  | atatacgtgc  | ttattttcat  | ctaagatgat  |
| 4981 | gtaattttgc  | cggctataat  | cagcttgatt  | gttggttaaa  | aaatttaatt  | gcacgttaag  |
| 5041 | cctcttacgt  | aacctctttc  | tggtagtaat  | ttttgcgcaa  | aaatttactt  | acgctcctaa  |
| 5101 | aatatctcag  | gtattctggg  | ctcatttctc  | ctcttaccat  | aaattgatta  | tgcaaaaggt  |
| 5161 | ctgttagccg  | tttttataaa  | gctcactttt  | aaaatattta  | ttgattgcat  | attctactga  |
| 5221 | tacattgaac  | attgctatta  | ttggaataaa  | aagtaataata | cctataaaat  | caaaatatga  |
| 5281 | agcgcatata  | gtaattccca  | gaataattac  | agttggatgt  | atatgaactt  | tttttcttat  |
| 5341 | taataaagga  | actaatatgt  | ttgaatctat  | taattgtcca  | acaccaaaata | atagcaaaac  |
| 5401 | ggcagcactt  | tcaaaccatc  | cactaaattg  | agtgatagcg  | ctcaaaaacc  | caataatggg  |
| 5461 | atataataat  | ggccctacgt  | aagggtatgaa | cggttaacatt | cctgataaaa  | ttccaataac  |
| 5521 | aatagagtgt  | tccaatccga  | ttatgctcag  | actcacagag  | taaaagacca  | tcatgacaat  |
| 5581 | acatacat    | acctgcccc   | ttagataaatt | agatataaat  | aaatccactt  | tggaaaaata  |
| 5641 | atctgcaatt  | tttcctctgt  | aagggaatagg | gattaatttta | ctagcttttt  | ctataatttaa |
| 5701 | aggccaatca  | cgtaatatat  | agaaaaacac  | tacaggagta  | atcaccatta  | atgataccgt  |
| 5761 | gttaaagctt  | gaacttaaca  | cttggaattat | aaagttacta  | gcaatatcaa  | gagcattcat  |
| 5821 | gaaataagat  | acatagttgc  | tgtaattttc  | tgctagattt  | ttagataaaat | gatcaaataa  |
| 5881 | gctatcctcg  | attttcatat  | taagaaattc  | taatacacag  | gggattactt  | gaagctttta  |
| 5941 | tgaaggcact  | ttactcacta  | agaaatttaa  | tattgaagta  | atgtgaacat  | atataatagg  |
| 6001 | taaaacaaat  | gttatgacta  | gtataaaagc  | tattaataaa  | ataagtatta  | taaaaattac  |
| 6061 | agaacatgaa  | cgtgggtattc | tatacttttc  | aaacttgact  | actagcggat  | taaacaaata  |
| 6121 | tgcaataata  | atagatatta  | aacatggaaa  | aatcatagga  | cgcacagga   | ataacatccc  |
| 6181 | tattataaaa  | agcagtatga  | aacaaatagt  | tatatgacgt  | ttttgcatgt  | gttttagcata |
| 6241 | gctaattttac | tgaaaaatat  | gcaattttat  | tttcctatgt  | tgaaagtatt  | ttacgatttg  |
| 6301 | taatactatc  | gttttttact  | aaaattttagt | tgttttaatcc | gcaggcaaa   | atagattttg  |
| 6361 | agctctctaa  | atatctcttt  | tgctattata  | attatgctag  | ttaatagggg  | aagtaacttt  |
| 6421 | tatatgatgt  | cagaaatttt  | atttttcgga  | agaatcttg   | gatagagagg  | aaagcttcta  |
| 6481 | caaaaagaaa  | tatgtgcgct  | aagaaatata  | aaatagcagc  | attaatagtt  | gcagcgggag  |
| 6541 | taggcagtag  | atgcaattct  | acgattccta  | agcaatatat  | aaaactggca  | ggtaaatctg  |
| 6601 | ttttattttca | tacaattaaa  | agattttctgg | ctaaccaata  | tatagattac  | ataagaatag  |
| 6661 | caattaatag  | agaccatgaa  | agttttctatg | agaaagctat  | atcactaatt  | acagacacta  |
| 6721 | aattactaag  | ccctgtatac  | ggaggagaaa  | acaggcaaa   | ttcagttaaa  | ctagggcttg  |
| 6781 | aaagcttaca  | aaaagttaac  | ccagatttttg | tagttataca  | cgatgcttgt  | aggccttttg  |
| 6841 | tgtcagatgt  | tctgatagat  | aacttggttg  | aatctatgat  | taatgatcaa  | tatacaggag  |
| 6901 | tagttccagc  | aatagaagtt  | gaagacacta  | tgctattggt  | gagtaatagt  | tttattgaat  |
| 6961 | ctacgatttc  | aagaggaaa   | ctcagagcca  | tacaaacccc  | tcaaattttt  | aatttcaaag  |
| 7021 | aattattatc  | atgccatcaa  | tcagtcaaag  | aattttactga | cgattcatca  | ctaattggtg  |
| 7081 | agcacaaaaa  | acatggttgcg | attatttaaag | gtgagaaaa   | caatttttaag | ttaaccacaa  |

```

7141 aagaggatat caatatggca aagcttcttt ttgaagagcc aaaatttcgt gtcggagccg
7201 gttatgatat acataagttc attaaagttc aaaatggtgc tgaaagcttt ataaaaattt
7261 gcggtgtgaa aattgaacac aacatggcaa tagaagcgca ctctgatggg gatgttgcaa
7321 tacatgcaat cgttgatgca atactcggag cactgggatg tggcgacata ggagagcact
7381 ttctctctag ttctcttgaa tggaaagatt gcaattcatc tcactttctt gactttgctg
7441 ctaaaaaagc aaaagaaaaa ggggtacagcg tgtctaattt agatattact atagtttggtg
7501 aagagcctaa aatatcgcct taciaagtag aaatgaagaa attcatatca aaagcattag
7561 aaattgatga tgaatttgta aatatcaaag caaccactgc agagaaaatt aggttatatt
7621 ggaagaaatg aaggaatagc agtgcattgt tctgtgttat tgcatacaaa cttttatttg
7681 aaatagaaac gaaaaaactt acttgacaac cttcgcagcag cccctttatc atgaaactga
7741 agctatttat ttatcttctc tgtacagatt aaatgacaaa aaaactcacg tatctggcgt
7801 ctcatgttta attttttgca ctatgtgcac cttatgtctt tatcaaattt ctgggttttt
7861 acctatacaa gctgaaatgc gcttataaag catttaaaac atcaaaaaac gccaaactaa
7921 aaaatggata gtgaataatt agctacccta gggtttcttt tgcctttttt tctgtttagt
7981 aaatttctta atgtttataa tttagattag ttgcggttta aaagcagact gaatcgcggt
8041 tattaaacgt ttagaataaa aaaacgccat acttgaaagt ataatgtaag taattagcca
8101 accacggggc ttcttttgcc tttttttctg tttggtaaatt ttttaatggt tgtggctaaa
8161 cgacaaccgt catcccgtcg cttgttagcg ggatctagag ataccgcggc ggcattgacgt
8221 aggactgctg tcattcaagt agctgacgct ggaatccagc cttgctgtaa tctcatcaag
8281 aacgttgtgt tttaacataa gatcagccac ttttatgctt accaaactta taaaattcct
8341 ggatccaagt agtcaggcta ctcggatgac accttcataa agtgaaatga gatcccgcta
8401 acaagcagcg ggatgacgag aaaggggcta ctcggatgac accctcataa agtaaaatga
8461 gatcccgcta acaagcagcg ggatgacgag aaaggggcta ctcggatgac accctcataa
8521 agtgaaaatg agatcccgct aacaagcagc gggaatgacg ggaaaagagg tgctagaatg
8581 acaccgttta ctatgtaaca tctcatcata tcacaatgtt cgtacagttg tggcgggatg
8641 acgtagaaaa actgttaact taaatctata ttgacatgtc ccattttacg cttatctcta
8701 acctcttttt tcccatatat gggttaaacta gctttttctg tgctcaaata cttatgagaa
8761 tcatatatat cattacctat tatatttttc gtcatacaag gaaagcgtaa tactacttcc
8821 tgcataggta cccgcatatt atcctaacta gctgttcaaa ttgactaacg ttacatgcat
8881 ccaagctcca gtggcaagaa ttgtgaggtc tgggagctag ttcattaact aacaattcgt
8941 tatccttagt aacaaaaaat tcaatagcca gaattcctat tacatcaagc gcatttgcta
9001 ttttctttgc agctcgttgt acctcttgag ttaattttact atctatttta gctggcactg
9061 ttgaagtatc aagtattcca tcaacgtggg aattttctgc tataggaaaa aaagctactt
9121 taccgttttt atctcttgca acgactattg aaacctcttt cagtaaatca acacttgctt
9181 caagaatgta ctctgtattc caatcaaagg aagcaaatg cttcacttca gaatcattct
9241 caagcacata ttgccctttt ccatcataac ccattttctg tgttttcagc cttgttggtg
9301 agccaaaagc tctactgctt ttccagtagc tcattataat tttgtatact tttgtattca
9361 gcagttttta tactcaagct tctaataaaa tctttctctc taagcctatt ttgcgcaatg
9421 tgtaacgctt ttttaccggy ataaaaattt acatcgatat taattgcact acatggaata
9481 ttttcagact caatagtgac caaatccaca ctctgtgcaa aagattcaag cgctttctta
9541 tcagagaaat ctgctattgt gaaatcatca gcaacagagc aagccggatc gtcttttagca
9601 ctggcaaaaa catgtgtttt ttgtccaagt tttgttgtag cgatagcagt ctttttacct
9661 aattgtccac cacctattat tcctattact tttttgctaa gcgcatctgg ttcattcata
9721 ctataaattg atatttccta attagagtat acttgaaaaa tctatgaaaa aagtatataa
9781 ttaggatact atctttttat catgaatatt ctataatgat tctagaatac aactaacta
9841 ccaactttgt tgaagttaca gttttacca tttatattga agagcaatcc attccttatg
9901 aaaattgcta tgtatggatg tataacgtta agataaaaaa caaaagccaa tcaactattc
9961 aattgttaag tcgtcattgg caaataatag attataaggg aaaagtaaat gaaattgccg
10021 gagttggtgt tatcggagaa caacctgtga taaaatctgg agaggtattc aaatacacia
10081 gtggaacata cttaaagca ccgtcaggaa taatgcaggg taagtatgaa tttctgaatg
10141 aagaaagcat aaaaattttt gaggttatga taccaccctt ttctttggat agtccatacg
10201 tcaaaactag accccattaa ctatcaaaat agttttattg taaccagact gcattctgtg
10261 attttttagca a

```

//

```

LOCUS      JAQZAU010000101      1500 bp      dna      linear      ENV 17-MAR-2023
DEFINITION MAG: Wolbachia pipientis isolate wEsol contig_50652, whole genome
            shotgun sequence.
ACCESSION  JAQZAU010000101 JAQZAU010000000
VERSION    JAQZAU010000101.1
DBLINK     BioProject: PRJNA929258

```

BioSample: SAMN33142973

KEYWORDS WGS; ENV; Metagenome Assembled Genome; MAG.

SOURCE Wolbachia pipientis (insect metagenome)

ORGANISM Wolbachia pipientis  
Bacteria; Pseudomonadota; Alphaproteobacteria; Rickettsiales;  
Anaplasmataceae; Wolbachieae; Wolbachia.

REFERENCE 1 (bases 1 to 1500)

AUTHORS Fiutek,N., Couger,B.M., Roy,S., de la Torre,J.R. and Connor,E.F.

TITLE Genomic assessment of the contribution of the Wolbachia  
endosymbiont of Eurosta solidaginis to gall-induction

JOURNAL International Journal Molecular Sciences

REFERENCE 2 (bases 1 to 1500)

AUTHORS Fiutek,N., Couger,B.M., Roy,S., de la Torre,J.R. and Connor,E.F.

TITLE Direct Submission

JOURNAL Submitted (10-FEB-2023) Biology, San Francisco State University,  
1600 Holloway Ave, San Francisco, CA 94132, USA

COMMENT ##Genome-Assembly-Data-START##  
Assembly Date :: JUN-2019  
Assembly Method :: FLYE v. 06-2019  
Genome Representation :: Full  
Expected Final Version :: Yes  
Genome Coverage :: 100.0x  
Sequencing Technology :: Illumina HiSeq; PacBio Sequel  
##Genome-Assembly-Data-END##

FEATURES

source 1..1500  
/organism="Wolbachia pipientis"  
/mol\_type="genomic DNA"  
/submitter\_seqid="contig\_50652"  
/isolate="wEsol"  
/isolation\_source="galls on Solidago altissima"  
/host="Eurosta solidaginis MN-2018-EFC"  
/db\_xref="taxon:955"  
/environmental\_sample  
/country="USA: Cowling Arboretum, Carleton College,  
Northfield, MN"  
/lat\_lon="44.48 N 93.13 W"  
/altitude="280 m"  
/collection\_date="2018-11"  
/metagenome\_source="insect metagenome"  
/note="metagenomic"

gene complement(<1..110)  
/locus\_tag="wEsol\_01152"

CDS complement(<1..110)  
/locus\_tag="wEsol\_01152"  
/codon\_start=1  
/transl\_table=11  
/product="hypothetical protein"  
/translation="MIAENNMEDIEIAIDSTGISIYNNTPGHSKENSTDR"  
/besthit="qcoverage 100 , hcoverage 54.5454545454545 ,  
similarity 97.2 , identity 97.2 , eval 2.00e-14 ,  
alnlength 36 , Bacteria , Proteobacteria , WP\_010082383.1  
MULTISPECIES: hypothetical protein [Wolbachia]"

gene complement(94..423)  
/locus\_tag="wEsol\_01153"

CDS complement(94..423)  
/locus\_tag="wEsol\_01153"  
/codon\_start=1  
/transl\_table=11  
/pfam="DDE\_Tnp\_1\_5"

```

/fullproduct="qcoverage 100 , hcoverage 100 , similarity
100 , identity 100 , evalue 4.31e-75 , alnlength 109 ,
Bacteria , Proteobacteria , WP_141456678.1 MULTISPECIES:
transposase [unclassified Wolbachia]"
/translation="MPQKMRVSNCHEYNKFLQERGSIFCYINDAIENWYENCPKMQGG
NYIYSDKVVILVHIIVSFFRIGLRQTVGFIKGYLQQIGRDLAVISYSQASRRFKKLN
KINDCRK"
/product="transposase"
/besthit="qcoverage 100 , hcoverage 100 , similarity 100
, identity 100 , evalue 4.31e-75 , alnlength 109 ,
Bacteria , Proteobacteria , WP_141456678.1 MULTISPECIES:
transposase [unclassified Wolbachia]"
gene complement(676..>1500)
/locus_tag="wEsol_01154"
CDS complement(676..>1500)
/locus_tag="wEsol_01154"
/codon_start=1
/transl_table=11
/product="hypothetical protein"
/translation="VKTDSTVSSEAELNPAEHKEVKAPSSLWDRVSSPFKSGKKSEK
TSEVKYQVLSESDLPRKIGNSTFYVDTPPTPIENTNKTATIGGRPVGVARNSTSNLTR
VGTPEVPTRSASLTNLNGQSSFSEDVLSDPKVNQYLGNSNKGTLTRSNSFDSARGSSG
PSTPTSSLERLEQSFSDKDEVGAAEKNLKEFSLSAKTESTLHNSFSNRNGSDSGFN
SPSTPTHTMFTENGKAKTQADLRKTGHLDKLVGQPSTKVAVDTDVQQQAAQTAVKTN"
/besthit="qcoverage 100 , hcoverage 42.8125 , similarity
99.6 , identity 99.6 , evalue 5.05e-173 , alnlength 274 ,
Bacteria , Proteobacteria , AGK00141.1 hypothetical
protein wHa_07010 [Wolbachia endosymbiont of Drosophila
simulans wHa]"

```

# ORIGIN

```

1 tttctgtcag tgctattttc cttgctgtga ccaggagtgt tgttgtatat actaatcct
61 gtactgtcta tagcaatttc gatatcttcc atattatttt ctgcaatcat ttatcttaat
121 attaagtttc ttaaaccctt ttgatgcttg tgaatagctg ataactgcca aatctcttcc
181 tatttgttgc aaataccctt ttataaaccc gactgtttgt cttaaaccaa ttctaaagaa
241 actgacgatt atatgcacca aaatcacaaac tttatcacta taaatatagt tgccgccctg
301 catttttggg caattctcgt accaattttt tatggcgtca ttgatataac aaaaaatgct
361 tcctctttct tggagaaaatt tggttatattc atggcagtta ctgactctca ttttttgtgg
421 catatttttt cttcaacagt taaatggcta tttataatga attttgtcag taactgccag
481 ttctttttcac ttgagcgatg caacaaagcc atccaagtgt cagctactcg gatgacacct
541 ttcctagcag agaaatcaca atgttcatac ggttgtacgc ataccgctgg gatctaggat
601 ttttctataa tttaaaaaca aaaaaggatg ttactcattg agtaacatcc ttttgagaa
661 ggtggatagc tttgtttagt tcgtttttcac agctgtttgt gcagcttgct gttgaacgtc
721 agtgtcaaca gctactttcg tagaaggctg tcccaccagt ttgtccagat gacctgtctt
781 tcttaagtca gcttgggttt ttgccttgcc attttcagta aacattgtat gtgttgagaa
841 agaagttggt gaattgaatc cactatcaga accattacga ttactaaaag aattgtgtaa
901 tgtagattca gtttttagcac ttaaaactaaa ttcttttaag tttttctcca ttgctgcccc
961 aacttcatct ttactgaaag attgttccaa tctttctaag gagcttggtg gtgtagaagg
1021 accagatgaa cctcttgcac tatcaaaaga attactgcga gttagagttc ctttattcga
1081 attaccaaga tattggttta ctttaggatc actgagaaca tcttactga aagaactttg
1141 tccatttaag ttagtcaatg aggcgcttct agttgggtact tctggagttc ctaccctagt
1201 aaggttgcta gtactattac gtcgtgcaac tcctggctct cctcctattg ttgcagtttt
1261 attagtattc tcaattggag taggagtatc aacgtaaaaa gtgctatttc ctatttttct
1321 aggcaacgtg tctgattcag aaagaacttg atatttaact tcagaagttt tttctgactt
1381 tttgccactt ttgaaagggt atgaaaccct atcccaaagt gaagaagggt cttttacttc
1441 tttatgctcc gcaggattta acaattccgc ttcgctgcta acagtactgt cagtctttac

```

//

```

LOCUS      JAQZAU010000102      8920 bp      dna      linear      ENV 17-MAR-2023
DEFINITION MAG: Wolbachia pipientis isolate wEsol contig_50662, whole genome
            shotgun sequence.
ACCESSION  JAQZAU010000102  JAQZAU010000000

```

VERSION JAQZAU010000102.1  
 DBLINK BioProject: PRJNA929258  
 BioSample: SAMN33142973  
 KEYWORDS WGS; ENV; Metagenome Assembled Genome; MAG.  
 SOURCE Wolbachia pipientis (insect metagenome)  
 ORGANISM Wolbachia pipientis  
 Bacteria; Pseudomonadota; Alphaproteobacteria; Rickettsiales;  
 Anaplasmataceae; Wolbachieae; Wolbachia.  
 REFERENCE 1 (bases 1 to 8920)  
 AUTHORS Fiutek,N., Couger,B.M., Roy,S., de la Torre,J.R. and Connor,E.F.  
 TITLE Genomic assessment of the contribution of the Wolbachia  
 endosymbiont of Eurosta solidaginis to gall-induction  
 JOURNAL International Journal Molecular Sciences  
 REFERENCE 2 (bases 1 to 8920)  
 AUTHORS Fiutek,N., Couger,B.M., Roy,S., de la Torre,J.R. and Connor,E.F.  
 TITLE Direct Submission  
 JOURNAL Submitted (10-FEB-2023) Biology, San Francisco State University,  
 1600 Holloway Ave, San Francisco, CA 94132, USA  
 COMMENT ##Genome-Assembly-Data-START##  
 Assembly Date :: JUN-2019  
 Assembly Method :: FLYE v. 06-2019  
 Genome Representation :: Full  
 Expected Final Version :: Yes  
 Genome Coverage :: 100.0x  
 Sequencing Technology :: Illumina HiSeq; PacBio Sequel  
 ##Genome-Assembly-Data-END##  
 FEATURES Location/Qualifiers  
 source 1..8920  
 /organism="Wolbachia pipientis"  
 /mol\_type="genomic DNA"  
 /submitter\_seqid="contig\_50662"  
 /isolate="wEsol"  
 /isolation\_source="galls on Solidago altissima"  
 /host="Eurosta solidaginis MN-2018-EFC"  
 /db\_xref="taxon:955"  
 /environmental\_sample  
 /country="USA: Cowling Arboretum, Carleton College,  
 Northfield, MN"  
 /lat\_lon="44.48 N 93.13 W"  
 /altitude="280 m"  
 /collection\_date="2018-11"  
 /metagenome\_source="insect metagenome"  
 /note="metagenomic"  
 gene <1..179  
 /locus\_tag="wEsol\_01155"  
 CDS <1..179  
 /locus\_tag="wEsol\_01155"  
 /codon\_start=1  
 /transl\_table=11  
 /product="hypothetical protein"  
 /translation="LGSAVLSFCNMMFGAIGIYIVGKFFRYGILPNLLLTACSTIAI  
 LMYSQKCTEKHRE"  
 /besthit="qcoverage 100 , hcoverage 35.1515151515151 ,  
 similarity 100 , identity 100 , evaluate 6.13e-31 ,  
 alnlength 58 , Bacteria , Proteobacteria , EAL59701.1  
 bicyclomycin resistance protein, partial [Wolbachia  
 endosymbiont of Drosophila simulans]"  
 gene complement(485..796)  
 /locus\_tag="wEsol\_01156"  
 CDS complement(485..796)

```

/locus_tag="wEsol_01156"
/codon_start=1
/transl_table=11
/fullproduct="qcoverage 100 , hcoverage 100 , similarity
100 , identity 100 , evalue 1.60e-74 , alnlength 103 ,
Bacteria , Proteobacteria , WP_155968470.1 transposase
[Wolbachia pipientis]"
/cog="COG3335 COG3335 132 Transposase and inactivated
derivatives"
/pfam="DDE_3 DDE_1"
/product="transposase"
/translation="MTFKGGCDKEVFNTWLEKMLLPKLPHGTTIVMDNATFHKTPKTK
ELIDNARCRLLYLPTYSPDLNPIEHCWNTIKSRLRPLMHKYTDLQLLVGNTIMEIYHS
F"
/besthit="qcoverage 100 , hcoverage 100 , similarity 100
, identity 100 , evalue 1.60e-74 , alnlength 103 ,
Bacteria , Proteobacteria , WP_155968470.1 transposase
[Wolbachia pipientis]"
gene complement(996..1343)
/locus_tag="wEsol_01157"
CDS complement(996..1343)
/locus_tag="wEsol_01157"
/codon_start=1
/transl_table=11
/fullproduct="qcoverage 100 , hcoverage 100 , similarity
100 , identity 100 , evalue 2.74e-74 , alnlength 115 ,
Bacteria;Eukaryota , Proteobacteria;Arthropoda ,
WP_155968342.1 MULTISPECIES: IS630 transposase-related
protein [Wolbachia]"
/cog="COG3415 COG3415 138 Transposase and inactivated
derivatives"
/pfam="HTH_Tnp_IS630 HTH_Tnp_1 HTH_23 HTH_28 HTH_29 HTH_7
CENP-B_N Pfam-B_14738 HTH_8 HTH_17 HTH_24 Pfam-B_2106"
/product="IS630
transposase-related protein"
/translation="MAYSVDLRERAVSMIEKGKSKVEVAELLEIGIATLYRWLRKKAA
GESLRPSKNGSFIRKIDPKILEEYVKKNPDHTLAEMKQNLGFGINSIWYRLKQLRITL
KKSYSISRASRR"
/besthit="qcoverage 100 , hcoverage 100 , similarity 100
, identity 100 , evalue 2.74e-74 , alnlength 115 ,
Bacteria;Eukaryota , Proteobacteria;Arthropoda ,
WP_155968342.1 MULTISPECIES: IS630 transposase-related
protein [Wolbachia]"
gene complement(1428..3134)
/locus_tag="wEsol_01158"
CDS complement(1428..3134)
/locus_tag="wEsol_01158"
/codon_start=1
/transl_table=11
/fullproduct="qcoverage 100 , hcoverage 100 , similarity
100 , identity 100 , evalue 0.0 , alnlength 568 ,
Bacteria , Proteobacteria , WP_155968533.1 MULTISPECIES:
arginine--tRNA ligase [Wolbachia]"
/cog="ArgS COG0018 577 Arginyl-tRNA synthetase"
/pfam="Arg_tRNA_synt_N tRNA-synt_1d tRNA-synt_1c
tRNA-synt_1e tRNA-synt_1 tRNA-synt_1e tRNA-synt_1f
tRNA-synt_1g DALR_1"
/tigr="TIGR00456 argS 569 arginine--tRNA ligase"
/product="arginine--tRNA
ligase"

```

```

/translation="MNIFKQISSLIFSKLNELKQRGVISTSAANFIEPPSNRVHGD
YTNVAMVLAKHEKKNPIEIAEVLAKFELFDEVAKVEIAGPGFINIHLKIKVWHGILK
QINELKTEFGTLDIGNNQAINVEFVSANPTGPLHIGHARGAVFGDVLANLLKKVGYKV
TKEYYINDAGAQIDTLIKSVYLRYKEALGEKISIEKGLYPGEYLKPIGEELAKKYGKE
LLKKQDNQIIREYTLSFILELIKEDMNLGVDVFTSEYELQKSGKIEESIKILSDK
GLVYEGYLEKPKGKESENWTSRKEMLFIRSTKFGDDVDRLKKEDGSWTYFASDIAYHF
DKISRGFNNMIVELGSDHGGYVKRLKAVVSALSDDQAKIEVKLHNIVNFFENGKPVKM
SKRSGNFLTARDVVEEVGRDITRFIMLTRKNDMVLDFDFAKVKEQSKDNPIFYVQYAH
ARAHSLMRNAPKELPTADPSLLRTGGELFLIKTLAKWPDVVEIAARLCEPHRITFYLL
EVAEAFHVLWGYGKSDLNMRFILEDNLNLTAARMFLVQALAHVIASGLSIFNIEPLEE
MS"
/besthit="qcoverage 100 , hcoverage 100 , similarity 100
, identity 100 , evalue 0.0 , alnlength 568 , Bacteria ,
Proteobacteria , WP_155968533.1 MULTISPECIES:
arginine--tRNA ligase [Wolbachia]"
gene complement(3228..3464)
/locus_tag="wEsol_01159"
CDS complement(3228..3464)
/locus_tag="wEsol_01159"
/codon_start=1
/transl_table=11
/fullproduct="qcoverage 100 , hcoverage 100 , similarity
100 , identity 100 , evalue 6.18e-36 , alnlength 78 ,
Bacteria , Proteobacteria , WP_155968535.1 MULTISPECIES:
hypothetical protein [Wolbachia]"
/translation="MLKHNYSDKINNRYSYTNKFSYSDEGVDETIKDKITTEDQVTE
DQVVTDDVEEPDAGNDGYSEGMAFSYHGYGNDLI"
/product="hypothetical protein"
/besthit="qcoverage 100 , hcoverage 100 , similarity 100
, identity 100 , evalue 6.18e-36 , alnlength 78 ,
Bacteria , Proteobacteria , WP_155968535.1 MULTISPECIES:
hypothetical protein [Wolbachia]"
gene complement(3660..5375)
/locus_tag="wEsol_01160"
CDS complement(3660..5375)
/locus_tag="wEsol_01160"
/codon_start=1
/transl_table=11
/fullproduct="qcoverage 100 , hcoverage 100 , similarity
100 , identity 100 , evalue 0.0 , alnlength 571 ,
Bacteria , Proteobacteria , WP_155968537.1 MULTISPECIES:
ATP-binding cassette domain-containing protein
[Wolbachia]"
/cog="MdlB COG1132 567 ABC-type multidrug transport
system, ATPase and permease components"
/pfam="ABC_membrane Pfam-B_2642 Pfam-B_15301 DUF258
AAA_29 AAA_16 AAA_22 AAA_14 Zeta_toxin AAA_18
Pfam-B_16450 AAA_17 AAA_21 ABC_tran SMC_N Pfam-B_6534
Pfam-B_5913"
/tigr="TIGR02204 MsbA_rel 576 ABC transporter,
permease/ATP-binding protein"
/product="ATP-binding
cassette domain-containing protein"
/translation="MRSNIRQLFYIYKPNLSYFIIAFIAVLFSALTILLFGRGLSNII
DSGTEHDFTTKLLVAILIVLAISLTAFTRLYFIGIGSEKVIARIRYDLYSSITNLQPS
FFENTGVQDVISALVTDTSVLQSIINSSLLTILRN FVILIGSVAMLLYTNIQLTAYAA
AIIPILLIIMTSLGKKVRSYARFAQDKLSELASFSEENFRSIVTIKSFVLEENEKIRF
KEHLNSVSKSYVKLVLLRAILVTLVITCVIGSLVLLFFGIKEVLSNNITIGELSSFF
FYSALAAAGAINNLSDNISDLQRLGIVERLFEFKNMKSSIVDADDPIKIYSVQKGISF
NGVTFFYESQLDKPALNNVSFSIEAGQAVSIVGPSGSGKSTILKLLRFHDPNKGSI

```

```

IDGHNIKSIALNDLRSLFGLVPQDHMIFSCSIMENILYGKPGAEEYEEVKQAAISAYAM
EFIDKLPDKFDTFVGKRGLKLSEGQKQRIIIARAILKNPQVLILDEATSALDYKSEN
VQKALSKLMQNRTTIVITHRLSTALKTDKIIIVINHGKVEEVGTHDSLISKDGLYAKLA
KIQWN"
/blasthit="qcoverage 100 , hcoverage 100 , similarity 100
, identity 100 , evalue 0.0 , alnlength 571 , Bacteria ,
Proteobacteria , WP_155968537.1 MULTISPECIES: ATP-binding
cassette domain-containing protein [Wolbachia]"
gene 6172..6615
/locus_tag="wEsol_01161"
CDS 6172..6615
/locus_tag="wEsol_01161"
/codon_start=1
/transl_table=11
/pfam="PDDEXK_2"
/fullproduct="qcoverage 100 , hcoverage 100 , similarity
98.6 , identity 97.3 , evalue 7.94e-96 , alnlength 147 ,
Bacteria , Proteobacteria , WP_155968539.1 MULTISPECIES:
PD-(D/E)XK nuclease family transposase [Wolbachia]"
/translation="MALSKFLDPKLDLTFKKIFGTEKNKNILIHFLNDILGCTEVNTI
QEVEFLSTIMDPEIASDKQSIVDVLCRDSTGAQYICEMVRPESLSYCLKGEEFIQKE
TERILKLIKPDVLPSESTHQCESGNRLVPSDADNEPPLEKEDAQS"
/product="PD-(D/E)XK
nuclease family transposase"
/blasthit="qcoverage 100 , hcoverage 100 , similarity 98.6
, identity 97.3 , evalue 7.94e-96 , alnlength 147 ,
Bacteria , Proteobacteria , WP_155968539.1 MULTISPECIES:
PD-(D/E)XK nuclease family transposase [Wolbachia]"
gene 6777..7043
/locus_tag="wEsol_01162"
CDS 6777..7043
/locus_tag="wEsol_01162"
/codon_start=1
/transl_table=11
/fullproduct="qcoverage 100 , hcoverage 100 , similarity
100 , identity 100 , evalue 2.05e-61 , alnlength 88 ,
Bacteria , Proteobacteria , WP_026097253.1 hypothetical
protein [Wolbachia endosymbiont of Ceratitidis capitata]"
/translation="MYANNNSTGIEKPPNPLLYDWRNRVSLYFRLHKGQTARNADGSA
GKGWKRKMPFCNEMDRICNINSRENEQTSIWSLVTRNFVNHLR"
/product="hypothetical protein"
/blasthit="qcoverage 100 , hcoverage 100 , similarity 100
, identity 100 , evalue 2.05e-61 , alnlength 88 ,
Bacteria , Proteobacteria , WP_026097253.1 hypothetical
protein [Wolbachia endosymbiont of Ceratitidis capitata]"
gene 7052..8599
/locus_tag="wEsol_01163"
CDS 7052..8599
/locus_tag="wEsol_01163"
/codon_start=1
/transl_table=11
/pfam="RVT_N RVT_1 GIIM"
/fullproduct="qcoverage 100 , hcoverage 100 , similarity
100 , identity 100 , evalue 0.0 , alnlength 515 ,
Bacteria , Proteobacteria , WP_155968541.1 MULTISPECIES:
group II intron reverse transcriptase/maturase
[Wolbachia]"
/translation="MITSKPVASASTESFEAWKQLPWKKCQKVIVRLQRRIVKAVQEGR
WGKVKALQHLLTRSFSGKALAVKRVTENQGKTTAGVDRQLWSTCNAKFQGIKLLKQRG
YKPSPLKRIYISKSNKRRPLGIPTIKDRAMQALYLLALEPVAETISDRHSYGRPKR

```

SCADATVACHLLLASRNQLQWILEGDIKGCFDNINHEWLMKHIPMEKKILHRWLKAGF  
LESKTLYPTTAGTPQGSIIISPILANFTLDGLEQLLESRFGLGSKRRGKIRSGVNVIR  
YADDFIISGFTHEVLENEVKPLVSSFLHERGLILSEEKTKITSITTGFDFLGCNVRRY  
NKKLIKPSKESIKRLLNKARTLIKANIANQAIIVIKSLNSLLRGWGNYYHHVCAKKA  
FRKIDNEIWHSLWKWAKKRHRPRKGLRWIKNRYFKVMGQRQWVFAAPICKNKPKEIRYL  
RLCLKLIDIPIRRHVKIRADANPLDLKWKYFDERVKRTRMLASSFSREGSLLLVSPLK  
LMYSEDL"

/product="group II intron

reverse transcriptase/maturase"

/besthit="qcoverage 100 , hcoverage 100 , similarity 100  
, identity 100 , evalue 0.0 , alnlength 515 , Bacteria ,  
Proteobacteria , WP\_155968541.1 MULTISPECIES: group II  
intron reverse transcriptase/maturase [Wolbachia]"

gene 8596..>8920

/locus\_tag="wEsol\_01164"

CDS 8596..>8920

/locus\_tag="wEsol\_01164"

/codon\_start=1

/transl\_table=11

/product="hypothetical protein"

/pfam="PDDEXK\_2"

/translation="MKDKPVRQKKNLDKGLKRSVGKPACCVSKGGSSSNTASLPDQLA  
RDKGFEKRAQLYAAKAYSRLDKSGNYIDLKKVFFIAISNCNLLPEEVDYISTHNIRD  
IKTNGH"

/besthit="qcoverage 100 , hcoverage 42.8571428571429 ,  
similarity 100 , identity 100 , evalue 6.59e-68 ,  
alnlength 108 , Bacteria , Proteobacteria ,  
WP\_155969279.1 MULTISPECIES: Rpn family  
recombination-promoting nuclease/putative transposase  
[Wolbachia]"

#### ORIGIN

```
1 ggcttggttag tgcagttctc tcattctgca atatgatggt tggggctatt ggaatatata
61 tagtaggaaa attttttcgc tatggtatgt taccaaaatt actattaaca atagcatgct
121 ctacaattgc aattcttatg tacagccagc tcaaatgtac tgaaaaacac agggaataac
181 cattatgtgc gtgatccaga gctcatgggt tattaatgac tttatcatga taatataatt
241 ttacaggggg tgagagctca tagattatta acggctttat cataacaata tagttttaca
301 agaggtgtag gatgagtagt tcacaaagta tagataatga ttttttaggc tgttgaaaga
361 ggtgatattg atgcagtaac ccgtcctaata agtgaaggag ctagatgtta atgcagtaga
421 tgaatataac aacactcctt tacattatgc tgctacgaat ggcatgagc agatatagta
481 ttttctaaaa tgaatgataa atttccatta tgggtattacc aacaaaaggt tgtaagtctg
541 tatatttatg cattaaaggt ctgaggcggc ttttgatggt attccaacaa tgctctatag
601 ggttcaaadc tgggtgaatat gttggttagat agagcaaacg gcatctagca ttatctatta
661 actcctttgt tttgggagtt ttatggaatg tggcattgtc cataactatt gtagtaccat
721 gtggcaattt aggtataaac atcttctcta accatgtatt gaatacctct ttgtcacacc
781 cacctttgaa agtcattggt gcaataaac tctttccaat ccaccgcct attatactga
841 ttctctctcg ttttcttcct ggaatatctg cataaaattt ctttcttatt ggagcacgtc
901 catactctcg gtataaccta ttatcaactc ctgcttcac tatatataag atgctggaat
961 ggtctatgtt tgagatttta tcggtaaatc gctgcctatc ttcttgattg cgctcttgat
1021 atagtgtaac ttttttttaa agtaattctt agctgtttca gcctatacca aattgaattt
1081 attccaaadc caagattttg tttcatctct gccagcgtat gatctggatt ctttttaaca
1141 tattcttcga gtatttttgg gtctatgttt cgaataaagc tgccgttttt cgatggcctt
1201 aggccttcac cagcggcttt ctttcttaac cagcgggtaca gagttgctat tcctatctcc
1261 aaaagctctg ccacctcaac ctttgacttc cttttttcta tcatcgatac tgccctttcc
1321 cttaaatacca cactatacgc cattataact caaatagctt attatacctt tatcatttac
1381 tttgggaagt actataatgt gatcattaca tattgttaaca aaaaaaatca actcatttct
1441 tctaacggct ctatattaaa gatagaaagt ccagaagcga tgacgtgtgc taaggcctgc
1501 acgagaaaca ttcttgcagc ggtgaggttt aagttgtctt ccagtatgaa acgcatgttt
1561 aaatcactct tgccataccc ccataaaacg tgaaacgctt ctgcaacttc aagtaagtag
1621 aaagtaattc tgtgtggctc acaaagcctt gctgcaattt ctaccacatc tggccacttt
1681 gctaagggtt ttatgaggaa gagctctcca cctgtcctta aaagtgaagg atctgctggt
```

|      |             |             |            |             |             |            |
|------|-------------|-------------|------------|-------------|-------------|------------|
| 1741 | gggagctctt  | ttggagcatt  | acgcattaac | gaatgagcac  | gagcatgcgc  | atattgcacg |
| 1801 | taaaaaatag  | ggttgtcttt  | tgactgttct | ttaacttttag | caaaatcaaa  | gtccaagacc |
| 1861 | atatcattct  | tgcgtgttag  | cattataaaa | cgagttatgt  | ccctgccaac  | ttcttccact |
| 1921 | acatctcttg  | ctgtgaggaa  | gtttcctgat | cttttggaca  | tcttaacagg  | tttgccgttc |
| 1981 | tcgaaaaaat  | tcacaatat   | atgcagtttt | acctctat    | ttgcttgatc  | atcactgagc |
| 2041 | gcagagacga  | ctgctttgag  | tcttttgaca | taaccgccgt  | ggcactacc   | aagctctacg |
| 2101 | atcatattgt  | taaaaccacg  | tgatatctta | tcaaaatgg   | aagcaatc    | cgaggcaaaa |
| 2161 | taagtccaac  | tgccgtcctc  | tttcttcaat | gcacgggtcaa | cgatcatcacc | aaattttgta |
| 2221 | gagcgaaata  | gcactctctt  | tctggaagtc | caattttcgc  | tttctttgcc  | ttttggtttc |
| 2281 | tccaggtacc  | cttcatacac  | tagacccttg | tcagacaata  | tctttatact  | ctcttcaatt |
| 2341 | ttgccacttt  | tttgtagctc  | atactctgaa | gtaaaaacat  | catgattttac | tccaagcaag |
| 2401 | ttcatgtctt  | cctttatgag  | ttctaagata | aaacttaaa   | tatatccct   | aattatttga |
| 2461 | ttatcttgct  | tttttagaag  | ctccttgcca | tatttttttag | ccagctcctc  | ccctatcggt |
| 2521 | tttaaataat  | cacctgggta  | taaacctttt | tctatactga  | ttttttctcc  | cagagcttct |
| 2581 | ttgtaccgca  | gatatactga  | ctttattagt | gtatctatct  | gcgctccagc  | atcgtaata  |
| 2641 | tagtattcct  | tagtaacttt  | ataaccaact | tttttcaata  | aatttgccag  | aacgtcacca |
| 2701 | aatactgcc   | ctcttgcatg  | accaatatgc | agtggaccag  | ttggatttgc  | agatacaaat |
| 2761 | tcaacattga  | tggcctgatt  | gttccctata | tctaggggtgc | caaactctgt  | ttttagctca |
| 2821 | tttatttggt  | ttaaaatccc  | atgccatact | tttattttta  | agtgtatggt  | gatgaaacca |
| 2881 | gggcccgtc   | tttccacttt  | tgcaacttca | tcaaaaagtt  | caaattcttt  | ggctaaaacc |
| 2941 | tctgcaattt  | caatgggatt  | cttcttttca | tgctttgcca  | gcaccatagc  | aacgtttgtg |
| 3001 | taaatgtctc  | catggactct  | attgcttgga | ggctctatga  | taaagtttgc  | tgcacttgtg |
| 3061 | cttataacac  | ccctttgttt  | caactcattc | aatttactaa  | agattagaga  | ggaaatctgc |
| 3121 | ttaaaaatgt  | tcattcacta  | tattgctata | aaatctatag  | cagtatagtg  | aataagtggt |
| 3181 | gctagttgaa  | ggtttatctt  | aactatttta | tcttcctgga  | tcagagtta   | tattaagtcg |
| 3241 | ttgccgtaac  | catggtaaga  | gaaagccata | ccttcactgt  | aaccatcatt  | accagcatca |
| 3301 | ggctcttcaa  | catcatcagt  | tactacctga | tcttcagtta  | ccacctgatc  | ttcagttgtg |
| 3361 | attttatcct  | tgatcgtctc  | gtctacaccc | tcatcactat  | aagaaaattt  | gttagtatat |
| 3421 | gaatagcgat  | tattgatttt  | atcactatag | ttatgtttta  | acatagagac  | ctcctataca |
| 3481 | gtcaaaattg  | gaattacatt  | aagatagaac | aagctatgaa  | tataacgtga  | atgaaagaaa |
| 3541 | ctacagatca  | cgaaatttcc  | ggataactat | ggaaccatta  | taaaataata  | aaattaaaaa |
| 3601 | tttaataatt  | tttaattataa | atctagcata | tcaactaacg  | gtatgattta  | aattttcttt |
| 3661 | caattccact  | gtatcttcgc  | cagttttgca | tacagcccgt  | ctttacttat  | tagagagtca |
| 3721 | tgagttccta  | cttcttctac  | tttcccatga | ttaattacta  | taatcttgct  | agtcttgagt |
| 3781 | gcggttgata  | gcctgtgtgt  | aattacgatt | gttgttctgt  | tttgcattaa  | cttgctcaag |
| 3841 | gctttttgca  | cgaggttctc  | acttttgtaa | tcaagggcag  | aggttgcttc  | atccagtatt |
| 3901 | aaaacctgag  | ggtttttgag  | tatggctctt | gctattataa  | tacgctgttt  | ttgtccttca |
| 3961 | gaaagtttta  | atcctctttt  | tcctacaaat | gtatcaaatt  | tatcaggcag  | cttatcaata |
| 4021 | aattccatcg  | cataagcgct  | gatggctgct | tgcttcactt  | cctcatattc  | ggcacctggg |
| 4081 | ttgccatata  | gtatattttc  | cattattgag | caagagaata  | tcatgtgatc  | ttgtggcact |
| 4141 | aagccaaaca  | acgatctgag  | gtcatttagc | gcaattgact  | taatattgtg  | cccatcgata |
| 4201 | gtaatgctac  | ctttgttttg  | atcatgaaaa | cggagcagaa  | gctttaaaaa  | ggtgctttta |
| 4261 | ccactgccag  | atgggtccaac | aattgatact | gcttgacctg  | cctctataga  | aaacgatata |
| 4321 | ttgtttaacg  | ctggcttatc  | aagctgagat | tcataaaaaa  | atgttacacc  | attaaacgaa |
| 4381 | attccttttt  | gaacactata  | aatttttata | ggatcatcgg  | catctactat  | agagcttttc |
| 4441 | atatttttta  | attcaaataa  | acgctctact | attccaagac  | ctcgttgtaa  | atcactgata |
| 4501 | ttatcgctca  | aattattttat | agctcctgcc | gcaagcgctg  | aataaaacac  | aaatgaggag |
| 4561 | agttctccaa  | tagttatatt  | attgcttaag | acttctttta  | taccaaaaaa  | gagcaaaaca |
| 4621 | actagtgaac  | ctatcacaca  | cgtgataact | agagttacta  | aaatagcacg  | caagagtact |
| 4681 | aatttttacgt | atgattttga  | tactgagttt | aaatgttcct  | taaaacggat  | tttttcgttt |
| 4741 | tcctcgagta  | caaacgattt  | gatagtcact | atagatctaa  | aattttcctc  | actaaatgac |
| 4801 | gcaagctcac  | ttaatattatc | ctgagcaaa  | cgtgcatagc  | tacgcacttt  | ttttccaagt |
| 4861 | gaggtcatga  | taatgagtag  | tataggtatt | attgcggctg  | catacgagct  | tagttgtata |
| 4921 | tttgtatata  | ataacatagc  | aacactgcc  | atcagaatca  | caaaatttcg  | taatattggt |
| 4981 | agtaagctgc  | tgtttattat  | tgattgcaac | acagatgtat  | cagtaactaa  | cgctgagata |
| 5041 | acatcttgta  | cgctgtgtt   | ctcaaagaaa | cttggttgca  | agttagtgat  | actgctatat |
| 5101 | aagtcatatc  | tgattcttgc  | gataactttc | tcgctgccaa  | tgccaatgaa  | atataaccga |
| 5161 | gtaaatgcag  | tgagagaaat  | ggctaaaact | ataagtattg  | caactaatag  | tttggtagta |
| 5221 | aaatcgtgct  | ctgtgccaga  | atcaattata | ttgcttaagc  | ctctgccaaa  | gaggaggatc |
| 5281 | gttaaggctg  | aaaataaaa   | tgcaataaaa | gctatgatga  | aataagatag  | attaggcttt |

|      |             |             |             |             |             |             |
|------|-------------|-------------|-------------|-------------|-------------|-------------|
| 5341 | atatagtaaa  | ataactgcct  | aatattagat  | cgcaccttat  | tttaaagttt  | ctaaagttaa  |
| 5401 | gtatatagat  | tttagtttca  | ggggaaaggg  | gaaaggtgta  | gtatgaagca  | atntaggttc  |
| 5461 | tgcagctggt  | gtgattttag  | tccaccaaga  | aagggtagta  | gctcgcagaa  | acaaaaaact  |
| 5521 | tgcttgacaa  | actccgccag  | ccctctttatc | ataaaattga  | agctattttat | ttatctttctc |
| 5581 | tgtacagatt  | aaatgacaaa  | aaaactcacg  | tatctggcgt  | ctcatgttta  | atTTTTtgc   |
| 5641 | ctatgtgcac  | cttatgtctt  | tatcaaactt  | ctacctacat  | aagctgaaac  | gcgcttataa  |
| 5701 | agcgttttaa  | acataaaaaa  | acgccaaactt | aaaaaatgga  | tagtgaataa  | ctagctaccc  |
| 5761 | tagggtttct  | tttgcctttt  | tttctgttta  | gtaaaatttct | taatgtttct  | aatttagatt  |
| 5821 | agttgcgggt  | taaaagcaac  | tgaatcgcg   | ttattaagca  | tttagaataa  | aaaaacgcca  |
| 5881 | tacttgaaag  | tataatgtaa  | gtaattagcc  | aaccacgggg  | cttcttttgc  | cttttttttc  |
| 5941 | gtttggtaaa  | tttcttaagt  | atztatggct  | aaacgacaat  | cgtcaccccg  | ctacgtgtta  |
| 6001 | gcgggatctc  | ttgttagcgc  | cgcggcggta  | tgacggtttg  | cggtgggtatg | acgataacct  |
| 6061 | cgtcatcccg  | ctacgtgtta  | gcgcgcgggc  | ggtatagcta  | tacttaaaaa  | tatgggtgaa  |
| 6121 | tagttgttaa  | taatagtgt   | taattattaa  | tcttttctca  | gtatttttac  | tatggctctt  |
| 6181 | tctaaatttc  | tcgatccaaa  | gtagatttta  | acatttaaga  | aaatcttttg  | cactgaaaaa  |
| 6241 | aataagaata  | ttcttatcca  | ttttttaaac  | gatattttag  | gatgtactga  | agtcaacact  |
| 6301 | atacaagaag  | tagaattctt  | aagcaccatt  | atggaccctg  | aaattgcttc  | tgataaacia  |
| 6361 | agcattgttg  | atgttctctg  | tagagattct  | acaggtgctc  | aatacatttg  | cgagatgggtg |
| 6421 | cgacctgaaa  | gtcttcggtc  | atattgttta  | aaaggagagg  | aattcattca  | gaaagaaact  |
| 6481 | gaaaggattc  | taaaacttat  | taaaccagat  | gttttgccat  | ctgagtctac  | gcatcagtgc  |
| 6541 | gaatcgggca  | accggttgg   | gccaagcgat  | gcggacaatg  | aacctcctct  | tgaaaaagaa  |
| 6601 | gatgctcaat  | cgtgagagag  | gcataaaactg | caagcatcat  | gtggttgagg  | ggctaggctt  |
| 6661 | agtggtatgg  | tgaacgtaag  | tgaagcttta  | taagtaccga  | tacgatgaaa  | gagctaaaga  |
| 6721 | tgctgataag  | ctctgaccaa  | aaggtaatgt  | ggataagata  | catttttcat  | ctctggatgt  |
| 6781 | acgcaaataa  | caattccacc  | ggtatagaga  | agccaccta   | cccactgttg  | tatgactgga  |
| 6841 | gaaacaggg   | aagcctgtat  | tttcgcctac  | atggcaagca  | aaccgcaagg  | aatgctgatg  |
| 6901 | gaagtgcagg  | taaaggagaa  | tggagaaagc  | gaatgccatt  | ttgtaacgaa  | atggatagaa  |
| 6961 | tttgtaacat  | taattctcgt  | gaaaacgagc  | agacttccat  | ttggctccctc | gtgacaagaa  |
| 7021 | actttgttaa  | ccacttaagg  | taggaaagca  | gatgattaca  | agtaaacctg  | taagtgcac   |
| 7081 | taccgaaagc  | tttgaagcat  | ggaagcaatt  | gccatggaag  | aaatgccaga  | aagtatttgt  |
| 7141 | gaggctacaa  | agacgtattg  | ttaaggctgt  | ccaagaagga  | agatggggta  | aggtaaaagc  |
| 7201 | tttacaacat  | cttctcacac  | gctctttttag | cggaaaagct  | ttggctgtta  | agagagtaac  |
| 7261 | tgaaaaccaa  | ggaaaaacca  | cagcaggtgt  | agatcgtcaa  | ctatgggtcaa | cttgcaatgc  |
| 7321 | taaattttcaa | ggaataaagc  | tgctaaaaca  | aagaggatat  | aaaccttctc  | cgctcaaacg  |
| 7381 | aattttatata | agtaaatacta | atggcaaaaag | aaggcctctt  | ggtataccca  | cgataaaaaga |
| 7441 | tagagcgatg  | caagcattgt  | atctgctcgc  | gttggaaccg  | gtagctgaaa  | caatcagtga  |
| 7501 | tcgtcactct  | tacggcttta  | gacctaaaag  | atcctgcgca  | gacgctactg  | tggcttgcca  |
| 7561 | cttattactg  | gcaagtcgta  | atcaactaca  | atggatactc  | gaaggtgata  | tcaaaggttg  |
| 7621 | ttttgataac  | attaaccatg  | aatggctcat  | gaagcatatt  | cctatggaga  | agaaaattct  |
| 7681 | tcatagatgg  | ttaaaagctg  | gtttcctaga  | atcgaaaact  | ctgtatccca  | caactgctgg  |
| 7741 | cactccgcaa  | ggaagtataa  | tttctccaat  | actagctaac  | tttaccttag  | atggtccttg  |
| 7801 | acagttatta  | gaaagtcgct  | ttggtaaatt  | aggtagcaaa  | agaagaggaa  | aaatcagaag  |
| 7861 | tggagtgaat  | gtaatcaggt  | acgcagacga  | ctttattatt  | tcaggtttca  | cacatgaagt  |
| 7921 | actggaaaat  | gaagttaagc  | ctttagtatc  | atcttttctt  | catgagcgag  | gttttaattct |
| 7981 | atcagaagag  | aagacaaaaga | ttacatctat  | cacaacaggg  | tttgactttc  | ttggttgtaa  |
| 8041 | tgtacgtaga  | tataataaga  | agttaattat  | taaaccttcg  | aaagaaagta  | ttaaaagact  |
| 8101 | tctgaataaa  | gcacgtacat  | tgataaaagc  | aaatatagcg  | aacactcagg  | ctatagtaat  |
| 8161 | taagtcactc  | aattctctac  | tgagaggatg  | gggaaattac  | tatcaccatg  | tgtgtgctaa  |
| 8221 | aaaagcgttt  | agaaagatcg  | acaatgaaat  | ttggcatagt  | ttatggaaat  | gggcaaagaa  |
| 8281 | aagacatcct  | cgtaaaggat  | tacgttggat  | aaagaatcgt  | tacttcaaag  | taatgggtca  |
| 8341 | acgccaatgg  | gtttttgctg  | cacccatatg  | caagaacaaa  | ccaaaagaga  | tacggtatatt |
| 8401 | aagactgctt  | aagctgattg  | atatacctat  | cagacgacat  | gttaaaatca  | gagcggatgc  |
| 8461 | aatccccctt  | gacttaaaat  | ggaaaaagta  | ttttgatgag  | agagtaaaac  | gaacaagaat  |
| 8521 | gttggcaagc  | tccttttcaa  | gagaaggttc  | tctactatta  | gtgtcaccac  | taaagttgat  |
| 8581 | gtattctgag  | gatttatgaa  | agacaagccg  | gttcgacaaa  | agaagaactt  | agataagggg  |
| 8641 | ctcaagcgta  | gtgtggggaa  | acctgcacgc  | tgcgtttcta  | agggagggag  | tagtagtaat  |
| 8701 | actgcttctt  | tacctgacca  | gctcgctaga  | gacaagggct  | tcgaaaaacg  | cgctcaatta  |
| 8761 | tatgccgcta  | aagcctactc  | aagacaatta  | gataaatctg  | gcaactacat  | tgatttaaag  |
| 8821 | aaagtcttct  | ttattgctat  | atcaaattgt  | aacttacttc  | ctgaagaagt  | tgatttatatt |
| 8881 | tctactcaca  | atatacgtga  | tataaaaact  | aacggccatt  |             |             |

```

//
LOCUS      JAQZAU010000103      17784 bp      dna      linear      ENV 17-MAR-2023
DEFINITION MAG: Wolbachia pipientis isolate wEsol contig_51520, whole genome
            shotgun sequence.
ACCESSION  JAQZAU010000103  JAQZAU010000000
VERSION    JAQZAU010000103.1
DBLINK     BioProject: PRJNA929258
            BioSample: SAMN33142973
KEYWORDS   WGS; ENV; Metagenome Assembled Genome; MAG.
SOURCE     Wolbachia pipientis (insect metagenome)
ORGANISM    Wolbachia pipientis
            Bacteria; Pseudomonadota; Alphaproteobacteria; Rickettsiales;
            Anaplasmataceae; Wolbachieae; Wolbachia.
REFERENCE  1  (bases 1 to 17784)
AUTHORS     Fiutek,N., Couger,B.M., Roy,S., de la Torre,J.R. and Connor,E.F.
TITLE       Genomic assessment of the contribution of the Wolbachia
            endosymbiont of Eurosta solidaginis to gall-induction
JOURNAL     International Journal Molecular Sciences
REFERENCE  2  (bases 1 to 17784)
AUTHORS     Fiutek,N., Couger,B.M., Roy,S., de la Torre,J.R. and Connor,E.F.
TITLE       Direct Submission
JOURNAL     Submitted (10-FEB-2023) Biology, San Francisco State University,
            1600 Holloway Ave, San Francisco, CA 94132, USA
COMMENT     ##Genome-Assembly-Data-START##
            Assembly Date      :: JUN-2019
            Assembly Method     :: FLYE v. 06-2019
            Genome Representation :: Full
            Expected Final Version :: Yes
            Genome Coverage      :: 100.0x
            Sequencing Technology :: Illumina HiSeq; PacBio Sequel
            ##Genome-Assembly-Data-END##
FEATURES             Location/Qualifiers
     source            1..17784
                        /organism="Wolbachia pipientis"
                        /mol_type="genomic DNA"
                        /submitter_seqid="contig_51520"
                        /isolate="wEsol"
                        /isolation_source="galls on Solidago altissima"
                        /host="Eurosta solidaginis MN-2018-EFC"
                        /db_xref="taxon:955"
                        /environmental_sample
                        /country="USA: Cowling Arboretum, Carleton College,
                        Northfield, MN"
                        /lat_lon="44.48 N 93.13 W"
                        /altitude="280 m"
                        /collection_date="2018-11"
                        /metagenome_source="insect metagenome"
                        /note="metagenomic"
     gene              complement(<1..994)
                        /locus_tag="wEsol_01165"
     CDS                complement(<1..994)
                        /locus_tag="wEsol_01165"
                        /codon_start=1
                        /transl_table=11
                        /product="hypothetical protein"
                        /pfam="Toprim_N Toprim_4 Toprim Toprim_3 Toprim_2"
                        /tigr="TIGR01391 dnaG 414 DNA primase"
                        /translation="MLNCPKSLSITKEDNKLFLALDLAANWFAQKNQGVVDYLKQRKI
                        SPKIIDKFKIGYAPSSGLKEYLNSSGIEDRILIDIGLVNKNFHDYFYDRLIFPIQSI
                        GRVIGFGGRVLSSEQQPKYLNSPESQLFKKRENLYGLNFALSEIRKKQHILVVEGYMD

```

AIALHQAGISNAVAPLGTAISAEQIKNLWRFakeISICMDGDSAGRHAATRVAELALP  
 ILEPGYTLKFVTLPSNKDPYDICNELAYKKEDVLTALDHSTKLHSEYLWHHIIDSNLQ  
 NYEKLAPEKYSILEHKFMEYVNTISNSSIRRYRDYFYNKASELRSSFKQIFNS"  
 /cog="DnaG COG0358 568 DNA primase (bacterial type)"  
 /besthit="qcoverage 98.7915407854985 , hcoverage  
 56.1855670103093 , similarity 100 , identity 99.7 ,  
 evalule 8.50e-230 , alnlength 327 , Bacteria ,  
 Proteobacteria , WP\_174517005.1 DNA primase [Wolbachia  
 endosymbiont of Cardiocondyla obscurior]"  
 gene complement(988..1257)  
 /locus\_tag="wEsol\_01166"  
 CDS complement(988..1257)  
 /locus\_tag="wEsol\_01166"  
 /codon\_start=1  
 /transl\_table=11  
 /product="hypothetical protein"  
 /pfam="zf-CHC2"  
 /tigr="TIGR01391 dnaG 414 DNA primase"  
 /translation="MDHIDIISKLLLLSDIVGKKVRLIKRGDSFVGLCPFHNEKTPSF  
 SVSNTKGLYYCFGCLASGDAFEFISQTEGLSFKEALEKISIGYRC"  
 /cog="DnaG COG0358 568 DNA primase (bacterial type)"  
 /besthit="qcoverage 94.3820224719101 , hcoverage  
 20.0956937799043 , similarity 100 , identity 97.6 ,  
 evalule 5.29e-49 , alnlength 84 , Bacteria ,  
 Proteobacteria , WP\_007548979.1 DNA primase, partial  
 [Wolbachia endosymbiont of Drosophila ananassae]"  
 gene 2158..2709  
 /locus\_tag="wEsol\_01167"  
 CDS 2158..2709  
 /locus\_tag="wEsol\_01167"  
 /codon\_start=1  
 /transl\_table=11  
 /fullproduct="qcoverage 100 , hcoverage 100 , similarity  
 100 , identity 98.4 , evalule 6.09e-122 , alnlength 183 ,  
 Bacteria , Proteobacteria , RLT60321.1 ribose 5-phosphate  
 isomerase B [Wolbachia endosymbiont of Drosophila  
 ananassae]"  
 /cog="RpiB COG0698 151 Ribose 5-phosphate isomerase RpiB"  
 /pfam="LacAB\_rpiB"  
 /tigr="TIGR00689 rpiB\_lacA\_lacB 145 sugar-phosphate  
 isomerase, RpiB/LacA/LacB family"  
 /product="ribose 5-phosphate isomerase B"  
 /translation="MLGIVSIASDHAGYELKSEIKPYLEALGYRVVDQGCTAKQKQCD  
 YPNYAVKVVEDITSKKANYGILICGTGLGMSTVANRFEGIIYAALCNSVEIAKLAREHG  
 NANVLCLGAGFTASGLAKDIVKQFLETEFSKESRHKRLDKLSNITSKKKKQKLITKM  
 KYQNSLKWQASGGMRTANSNHCT"  
 /besthit="qcoverage 100 , hcoverage 100 , similarity 100  
 , identity 98.4 , evalule 6.09e-122 , alnlength 183 ,  
 Bacteria , Proteobacteria , RLT60321.1 ribose 5-phosphate  
 isomerase B [Wolbachia endosymbiont of Drosophila  
 ananassae]"  
 gene 2658..3332  
 /locus\_tag="wEsol\_01168"  
 CDS 2658..3332  
 /locus\_tag="wEsol\_01168"  
 /codon\_start=1  
 /transl\_table=11  
 /fullproduct="qcoverage 100 , hcoverage 100 , similarity  
 100 , identity 100 , evalule 1.11e-160 , alnlength 224 ,  
 Bacteria , Proteobacteria , WP\_077190118.1 bifunctional

2-polyprenyl-6-hydroxyphenol  
 methylase/3-demethylubiquinol 3-O-methyltransferase UbiG  
 [Wolbachia pipientis]"  
 /cog="UbiG COG2227 243  
 2-polyprenyl-3-methyl-5-hydroxy-6-metoxo-1,4-benzoquinol  
 methylase"  
 /pfam="Methyltransf\_16 Methyltransf\_8 TehB AdoMet\_MTase  
 Pfam-B\_802 Methyltransf\_32 GidB Methyltransf\_23  
 Methyltransf\_PK PrmA CMAS Ubie\_methyltran Methyltransf\_9  
 Methyltransf\_31 MTS Methyltransf\_18 NodS Methyltransf\_26  
 MetW Methyltransf\_15 Methyltransf\_11 Methyltransf\_12  
 Methyltransf\_25 DUF43"  
 /tigr="TIGR01983 UbiG 228 3-demethylubiquinone-9  
 3-O-methyltransferase"  
 /product="bifunctional  
 2-polyprenyl-6-hydroxyphenol  
 methylase/3-demethylubiquinol 3-O-methyltransferase UbiG"  
 /translation="MAGQWWDENGKFKPLHMMNPVRVSYIIIEKIKELKKCNLKELSL  
 DVGCGGILSESMARVGINVVIGIDVCEENIKVAHSHAKKVGLNIEYIHTSIEELSNDK  
 KYDVVLLMEVVEHVDNLELFMKKAIELLKPEGLIFISTINRTIKSFCLAIIGA EYILN  
 WLPKGTHNWNKFLKPSEIANHLRENNVTLQNMAGMEYNVIKREWNLTGVDVNYILCG  
 LLDLTL"  
 /besthit="qcoverage 100 , hcoverage 100 , similarity 100  
 , identity 100 , evalule 1.11e-160 , alnlength 224 ,  
 Bacteria , Proteobacteria , WP\_077190118.1 bifunctional  
 2-polyprenyl-6-hydroxyphenol  
 methylase/3-demethylubiquinol 3-O-methyltransferase UbiG  
 [Wolbachia pipientis]"  
 gene complement(3344..3784)  
 /locus\_tag="wEsol\_01169"  
 CDS complement(3344..3784)  
 /locus\_tag="wEsol\_01169"  
 /codon\_start=1  
 /transl\_table=11  
 /pfam="TrbC"  
 /fullproduct="qcoverage 100 , hcoverage 100 , similarity  
 100 , identity 100 , evalule 2.03e-102 , alnlength 146 ,  
 Bacteria , Proteobacteria , WP\_010082521.1 MULTISPECIES:  
 TrbC/VirB2 family protein [Wolbachia]"  
 /translation="MIIERTMRNFLVILFIVFYAFDAHADGATDVMCNVIGYVHGIGG  
 PMITVVIIGSSLLAIFGRMPWPALFALGMFVAVFFGAPQIVTKVTEKEVCCLFKGQTL  
 ENGKCVAAPGYERVGTGYACRSGWALTNGGYCIKAGQDPSKYWK"  
 /product="TrbC/VirB2 family  
 protein"  
 /besthit="qcoverage 100 , hcoverage 100 , similarity 100  
 , identity 100 , evalule 2.03e-102 , alnlength 146 ,  
 Bacteria , Proteobacteria , WP\_010082521.1 MULTISPECIES:  
 TrbC/VirB2 family protein [Wolbachia]"  
 gene 3924..5507  
 /locus\_tag="wEsol\_01170"  
 CDS 3924..5507  
 /locus\_tag="wEsol\_01170"  
 /codon\_start=1  
 /transl\_table=11  
 /pfam="tRNA-synt\_1 tRNA-synt\_1g tRNA-synt\_1e tRNA-synt\_1g  
 tRNA-synt\_1e tRNA-synt\_1 Anticodon\_1"  
 /fullproduct="qcoverage 99.4307400379507 , hcoverage  
 96.1467889908257 , similarity 100 , identity 100 , evalule  
 0.0 , alnlength 524 , Bacteria , Proteobacteria ,  
 WP\_015589097.1 MULTISPECIES: methionine--tRNA ligase

```

[unclassified Wolbachia]"
/translation="MEQFENFYITTPVYYVNDKPHIGHAYTSLLCDVVARFMKLAGKN
VKFTTGTDEHGQKIEKAAKAKEMQPKEFTDDVSVSFKELAKFMNFEYDDFIRTTEERH
KKAVALWNRLEERGQIYLDYSYSGWYSVRDEAFYQESELIDGKAPTGAEVQWIKEESY
FFRLSNWQDKLLELYKNQPSFIFPESRRNEVISFVRSLIDLSISRTSFNWGIKVPKN
DKHVIYVWIDALTNYLTSIGLPSTEGEEYKRFWAEPTQIPVSSTGMTPNQGKTQIPV
SSAANLADNSFNHVHIGKDILRFHAVYWPAILLAADLPLPKQIAVHGWWLNEGEKISK
SLGNVIDPIGLAQEFQVDQLRYFLLREASFGQDGNFSKKNMISRINSELANNIGNLVQ
RTISFLHKQCSGIVPTIDQSLKGEESLPGCKAILDQVMNHLISKYEFNHIILLIINIS
SEANAYIDKSAPWTLSKTDRERMNLVIYKLELYIRIIGILLQPIVPKSAEMILNQLQI
PKEQRDLKSLCDACVSFQA"
/product="methionine--tRNA
ligase"
/besthit="qcoverage 99.4307400379507 , hcoverage
96.1467889908257 , similarity 100 , identity 100 , evaluate
0.0 , alnlength 524 , Bacteria , Proteobacteria ,
WP_015589097.1 MULTISPECIES: methionine--tRNA ligase
[unclassified Wolbachia]"
gene complement(5637..6386)
/locus_tag="wEsol_01171"
CDS complement(5637..6386)
/locus_tag="wEsol_01171"
/codon_start=1
/transl_table=11
/product="hypothetical protein"
/translation="MFMYSFEPVKSALKALEAAEKHCDSIESAKGTISSVGNRLKSV
YDTMPSTKIEFSWVSEKFSFYWNSVKNLMFGNKADQASGASQLSSESQGNIGIVIPEGA
KLELSPILFDLFLFREKQKMVRQFLREQTDEKKNVATQENLKTETPSQENQMNIQNVK
QPDHLNVDAAKSYLMSLSEDQDVFYDAESGDEKGTEISSPESQPTKEENGQGWFAWSL
GKVKSAMTEVVIGADVTKPYCAKVTKALAT"
/besthit="qcoverage 89.5582329317269 , hcoverage
68.6153846153846 , similarity 99.1 , identity 98.2 ,
evaluate 7.16e-146 , alnlength 223 , Bacteria ,
Proteobacteria , WP_209452535.1 hypothetical protein
[Wolbachia endosymbiont of Ceratosolen solmsi]"
gene complement(6546..6683)
/locus_tag="wEsol_01172"
CDS complement(6546..6683)
/locus_tag="wEsol_01172"
/codon_start=1
/transl_table=11
/product="hypothetical protein"
/translation="MIAATEGLMLLSSNAVEFDSINSSLLREISKYKLRAIIHSKRE
I"
gene complement(6830..7099)
/locus_tag="wEsol_01173"
CDS complement(6830..7099)
/locus_tag="wEsol_01173"
/codon_start=1
/transl_table=11
/product="hypothetical protein"
/pfam="DUF2788"
/translation="MVLIFYIIREMMNKNNVPYYIAGTLATFTLLASGVFAAAPYIGFL
APVAALSVGLPFIIGGAVFSAVAIALSYAAVSKNKTISEKKLSFR"
/besthit="qcoverage 94.3820224719101 , hcoverage 48 ,
similarity 100 , identity 100 , evaluate 4.60e-44 ,
alnlength 84 , Bacteria , Proteobacteria , WP_007548972.1
MULTISPECIES: hypothetical protein [unclassified
Wolbachia]"
gene complement(7186..7860)

```

CDS

```

/locus_tag="wEsol_01174"
complement(7186..7860)
/locus_tag="wEsol_01174"
/codon_start=1
/transl_table=11
/product="hypothetical protein"
/pfam="DnaB_C AAA_25"
/tigr="TIGR00665 DnaB 435 replicative DNA helicase"
/translation="MSAEQLTARLITIDSGISYYKALTGRISDFELHEFINTSTELSE
LPFIIDDTPALISALRTRIRLLYQLYNVEVVFIDYLQLIRGTTKRSNENRVQEISEV
TQGLKAIAKELNIPIVALSQLSRVSEQRDDKKPQLSDLRDSGSIEQDADIVMFLYREE
YYELRKQPNEGNNKHREWQEKMEKIRNIAELIIAKQRNGPIGSVKLYFDSNRGA FKDY
TERHSS"
/cog="DnaB COG0305 435 Replicative DNA helicase"
/besthit="qcoverage 100 , hcoverage 59.5744680851064 ,
similarity 100 , identity 100 , evaluate 4.03e-148 ,
alnlength 224 , Eukaryota , Arthropoda , GFQ88494.1
replicative DNA helicase [Trichonephila clavata]"

```

gene

CDS

```

complement(7862..8638)
/locus_tag="wEsol_01175"
complement(7862..8638)
/locus_tag="wEsol_01175"
/codon_start=1
/transl_table=11
/fullproduct="qcoverage 96.5116279069768 , hcoverage
91.5441176470588 , similarity 99.2 , identity 98.4 ,
evaluate 1.21e-166 , alnlength 249 , Bacteria ,
Proteobacteria , POG52130.1 replicative DNA helicase,
partial [Wolbachia sp. wRi_2]"
/cog="DnaB COG0305 435 Replicative DNA helicase"
/pfam="DnaB DnaB_C AAA_25"
/tigr="TIGR00665 DnaB 435 replicative DNA helicase"
/product="replicative DNA helicase, partial"
/translation="MNELANLLSSRSVDKEICKLPHNLEAEQMLIGAMIRDNRICDAV
EDTITAENFYDPLHQSI FTQISKTRKHGIVANELSLKMFFENDQAFTECGGVEYLAKL
AAKASIALDIYSLTRIIRD TYLRRLIKLGQEIVGDSYNYDIENPAQAQIEQAMTKLF
NLAVKKQGEKTYIKLASSIKDVVEKISTLKNNP EALGVTTGLQDLNQLLGGLQKSDL
ILAARPSMGKTALALNIALNACKMLQKRADKATLCSVFLA"
/besthit="qcoverage 96.5116279069768 , hcoverage
91.5441176470588 , similarity 99.2 , identity 98.4 ,
evaluate 1.21e-166 , alnlength 249 , Bacteria ,
Proteobacteria , POG52130.1 replicative DNA helicase,
partial [Wolbachia sp. wRi_2]"

```

gene

CDS

```

8860..9165
/locus_tag="wEsol_01176"
8860..9165
/locus_tag="wEsol_01176"
/codon_start=1
/transl_table=11
/product="hypothetical protein"
/translation="MLHKFFNRLFSIFSSINVIQKVKKDENGICYVTGLRRYISVLLD
LIIIVLFLQFCSQALNQLFMNSED SKILSQIAAKYQMQVPLSIEEKTQ SRLVNYGS"
/besthit="qcoverage 95.049504950495 , hcoverage
48.4848484848485 , similarity 100 , identity 100 , evaluate
6.11e-55 , alnlength 96 , Bacteria , Proteobacteria ,
WP_155968350.1 MULTISPECIES: RDD family protein
[Wolbachia]"

```

gene

CDS

```

9210..9455
/locus_tag="wEsol_01177"
9210..9455

```

```

/locus_tag="wEsol_01177"
/codon_start=1
/transl_table=11
/product="hypothetical protein"
/pfam="RDD"
/translation="MWVKFATTPGKLLFGLRVVDAQTFEKMTLKQATKRFFSFILSVA
PLFLGFLWSNFKRCQTDHDKIAGTVVVTSLRRQS"
/cog="COG1714 COG1714 172 Predicted membrane
protein/domain"
/besthit="qcoverage 100 , hcoverage 40.9090909090909 ,
similarity 100 , identity 100 , evalue 2.75e-50 ,
alnlength 81 , Bacteria , Proteobacteria , WP_209472843.1
RDD family protein [Wolbachia endosymbiont of Wiebesia
pumilae]"
gene 9598..9828
/locus_tag="wEsol_01178"
CDS 9598..9828
/locus_tag="wEsol_01178"
/codon_start=1
/transl_table=11
/fullproduct="qcoverage 100 , hcoverage 100 , similarity
100 , identity 100 , evalue 6.46e-46 , alnlength 76 ,
Bacteria , Proteobacteria , WP_041573522.1 MULTISPECIES:
hypothetical protein [Wolbachia]"
/translation="MTPLGTAVVKEPVSATRMTEKEDSVSATFMTFFAVFKNECSYNCA
SCALLNILLKNLISYYTRDKQFIDDEKLQKGA"
/product="hypothetical protein"
/besthit="qcoverage 100 , hcoverage 100 , similarity 100
, identity 100 , evalue 6.46e-46 , alnlength 76 ,
Bacteria , Proteobacteria , WP_041573522.1 MULTISPECIES:
hypothetical protein [Wolbachia]"
gene 9803..10477
/locus_tag="wEsol_01179"
CDS 9803..10477
/locus_tag="wEsol_01179"
/codon_start=1
/transl_table=11
/fullproduct="qcoverage 100 , hcoverage 100 , similarity
100 , identity 99.6 , evalue 1.34e-152 , alnlength 224 ,
Bacteria , Proteobacteria , WP_197907349.1 DNA repair
protein RadC [Wolbachia endosymbiont of Kradibia
gibbosae]"
/cog="RadC COG2003 224 DNA repair proteins"
/pfam="HHH_2 RadC"
/tigr="TIGR00608 radc 218 DNA repair protein RadC"
/product="DNA repair protein RadC"
/translation="MKNYKKGHRKRLREKIILDNGQSLLDYEVLEHILYSAYSRIDVK
PIAKSLIENFGSLNKVFNADLEALQNVDDVSNAAISAIFCVKQAFVRSAREEIKNLPV
IDNWEKLLDYLRLISIGSLNKENFRVIYMNKKYRLIAEDLQNIQTVDQTPLYVREIIEER
ALLIGSTSIIVISHNHPSGDTQPSNSDISLTRQLAEACQSIGIELIDHIIITFSSYFSF
KENRLL"
/besthit="qcoverage 100 , hcoverage 100 , similarity 100
, identity 99.6 , evalue 1.34e-152 , alnlength 224 ,
Bacteria , Proteobacteria , WP_197907349.1 DNA repair
protein RadC [Wolbachia endosymbiont of Kradibia
gibbosae]"
gene 10747..11037
/locus_tag="wEsol_01180"
CDS 10747..11037
/locus_tag="wEsol_01180"

```

```

/codon_start=1
/transl_table=11
/fullproduct="qcoverage 100 , hcoverage 100 , similarity
100 , identity 100 , evalue 3.25e-64 , alnlength 96 ,
Bacteria , Proteobacteria , WP_007549156.1 MULTISPECIES:
GIY-YIG nuclease family protein [Wolbachia]"
/cog="COG2827 COG2827 95 Predicted endonuclease
containing a URI domain"
/pfam="GIY-YIG T5orf172"
/product="GIY-YIG nuclease
family protein"
/translation="MKLSYIYILTNNKANSTLYIGVTANLIKRIWEHKNKIVSGFTSRY
NVNKLIVYFEEFEDISLAIARERRRLKEWPRQWKINLINQKNPSWVDLYYLALR"
/besthit="qcoverage 100 , hcoverage 100 , similarity 100
, identity 100 , evalue 3.25e-64 , alnlength 96 ,
Bacteria , Proteobacteria , WP_007549156.1 MULTISPECIES:
GIY-YIG nuclease family protein [Wolbachia]"
gene complement(11948..12520)
/locus_tag="wEsol_01181"
CDS complement(11948..12520)
/locus_tag="wEsol_01181"
/codon_start=1
/transl_table=11
/product="hypothetical protein"
/pfam="UvrD_C UvrD_C_2"
/tigr="TIGR02784 addA_alphas 1138 double-strand break
repair helicase AddA"
/translation="MVIYSELNYLINLSRIESPLALFTHILRTGKKKFAARLGLECFE
VLDEFMNLVLQFENPSLQAFVQWIKENNPEIKNDMQSERNAVRIMTIHKSGLQAPIV
FLVDTNTVPRNSESIIFDGTEAPFWCGKNNNAYCDQVKREKKLEDYNEYLRLLYVALT
RAEDELTYILSKEPVQKGSWYDLITQYGDII"
/cog="RecB COG1074 1139 ATP-dependent exoDNase
(exonuclease V) beta subunit (contains helicase and
exonuclease domains)"
/besthit="qcoverage 98.9473684210526 , hcoverage
64.8275862068965 , similarity 96.8 , identity 95.2 ,
evalue 1.54e-123 , alnlength 188 , Eukaryota , Arthropoda
, CAG5057326.1 unnamed protein product [Parnassius
apollo]"
gene complement(12634..13626)
/locus_tag="wEsol_01182"
CDS complement(12634..13626)
/locus_tag="wEsol_01182"
/codon_start=1
/transl_table=11
/product="hypothetical protein"
/pfam="UvrD-helicase UvrD_C"
/tigr="TIGR02784 addA_alphas 1138 double-strand break
repair helicase AddA"
/translation="MEKFKDAEQIIESVQNVVFTHIRDMNSYQIFKRTSSLLGIFKVY
VDLYSSEKSKNALLDYNDIIGLATNLLSNPNYKDWILFNLDQKIDHILVDEAQDNSIS
QWKIITNLCDEFFAGNDEKRTLFFVVGDKQSIYRFQGANPHLFNYMQQYFHTKTGGRD
WISCQLEKSFRSTPEVLMLVDRIFFNNFRAEISFNDNEIKHVPHRENDQGYIEIWPALP
RRKEKEQRALQIPLTCKEGYTIADRLLAQTIANRIHNWLNENGRILVAKDRHIEPRDIM
ILVRQRNVLDYIISELKKANVPVVGGRDYFRIMDYIAVQDLIALAEFLLLQQMI"
/cog="RecB COG1074 1139 ATP-dependent exoDNase
(exonuclease V) beta subunit (contains helicase and
exonuclease domains)"
/besthit="qcoverage 99.0909090909091 , hcoverage
72.6666666666667 , similarity 99.4 , identity 97.2 ,

```

```

evaluate 1.78e-225 , alnlength 327 , Bacteria ,
Proteobacteria , EAL58754.1 helicase, UvrD/Rep/AddA
family, partial [Wolbachia endosymbiont of Drosophila
ananassae]"
gene complement(13851..14585)
/locus_tag="wEsol_01183"
CDS complement(13851..14585)
/locus_tag="wEsol_01183"
/codon_start=1
/transl_table=11
/product="hypothetical protein"
/pfam="UvrD-helicase AAA_30 AAA_19"
/tigr="TIGR02784 addA_alphas 1138 double-strand break
repair helicase AddA"
/translation="MYNAILVNFYKVLALLMRSNAINPNFSVWVNASAGTGKTKILID
RVLRLLENKRNILCLTFTNAAANEMENRIHSILSKWAICSDSELIMDLEQLDFFPMY
PYLSSQCVTLGSRKNKDYLTRARRLFSELENLGLTIQTIHAFCYKLISSEFPIKAGIAP
NCTLSECKELHSIIFNKVLHNETVQDDINLIATEIDENKLRDLLYTLCVKRMSANDS
KYIKDKLSAPDGIHDLQSETIEHVED"
/besthit="qcoverage 99.5901639344262 , hcoverage
22.3140495867769 , similarity 96.3 , identity 95.9 ,
evaluate 2.04e-149 , alnlength 243 , Bacteria ,
Proteobacteria , AAS14088.1 helicase, UvrD/Rep/AddA
family [Wolbachia endosymbiont of Drosophila
melanogaster]"
gene 14619..15485
/locus_tag="wEsol_01184"
CDS 14619..15485
/locus_tag="wEsol_01184"
/codon_start=1
/transl_table=11
/fullproduct="qcoverage 100 , hcoverage 100 , similarity
100 , identity 100 , evaluate 3.19e-201 , alnlength 288 ,
Bacteria , Proteobacteria , WP_174516779.1 4-(cytidine
5'-diphospho)-2-C-methyl-D-erythritol kinase [Wolbachia
endosymbiont of Cardiocondyla obscurior]"
/cog="IspE COG1947 289
4-diphosphocytidyl-2C-methyl-D-erythritol 2-phosphate
synthase"
/pfam="GHMP_kinases_N GHMP_kinases_C"
/tigr="TIGR00154 ispE 294 4-(cytidine
5'-diphospho)-2-C-methyl-D-erythritol kinase"
/product="4-(cytidine
5'-diphospho)-2-C-methyl-D-erythritol kinase"
/translation="MKSFCVKAPAKINLFLHVVDKKETGYHLIEGLFVFANLSNFLEI
KVGEKDSRYDNSTVEFINSESRINNQYNTVMKAVNLLLRHAPVRTKVTVKVVKNIPIA
AGLGSGSSDAGAVVRTLGKLWEIDRTILNEIALNVGADVPPASVDSKPVFVRGIGEELC
HIKKFSLPTNVVLVKPKKRFLSTPEVFSKHEGKFSEPIKWSDDAEKDLLKLLKETRND
LQEIAISFVPEIKDVISTLESQEGSILFRMSGSGVSCFGIFDSEENAKAAAVNIGKKQ
PEWWVCDTQLIV"
/besthit="qcoverage 100 , hcoverage 100 , similarity 100
, identity 100 , evaluate 3.19e-201 , alnlength 288 ,
Bacteria , Proteobacteria , WP_174516779.1 4-(cytidine
5'-diphospho)-2-C-methyl-D-erythritol kinase [Wolbachia
endosymbiont of Cardiocondyla obscurior]"
gene 15489..15845
/locus_tag="wEsol_01185"
CDS 15489..15845
/locus_tag="wEsol_01185"
/codon_start=1

```

```

/transl_table=11
/fullproduct="qcoverage 100 , hcoverage 100 , similarity
100 , identity 100 , evalue 6.14e-77 , alnlength 118 ,
Bacteria , Proteobacteria , WP_015589089.1 MULTISPECIES:
Mth938-like domain-containing protein [unclassified
Wolbachia]"
/cog="COG3737 COG3737 127 Uncharacterized conserved
protein"
/pfam="DUF498"
/product="Mth938-like
domain-containing protein"
/translation="MPLISENKNLINGYREGKFLVNNREYCGSIIIFPEKVIKLESD
INSKEHFKSFLTEEIEILIIGTGKTRNILSSSVKSYLMEQKGLNFEEFMTGSACRTHN
VLISEDRLFVSYLIAI"
/besthit="qcoverage 100 , hcoverage 100 , similarity 100
, identity 100 , evalue 6.14e-77 , alnlength 118 ,
Bacteria , Proteobacteria , WP_015589089.1 MULTISPECIES:
Mth938-like domain-containing protein [unclassified
Wolbachia]"
gene 15847..16647
/locus_tag="wEsol_01186"
CDS 15847..16647
/locus_tag="wEsol_01186"
/codon_start=1
/transl_table=11
/fullproduct="qcoverage 100 , hcoverage 100 , similarity
100 , identity 99.6 , evalue 1.08e-156 , alnlength 266 ,
Bacteria;Eukaryota , Proteobacteria;Arthropoda ,
WP_010962536.1 MULTISPECIES: metal ABC transporter
permease [Wolbachia]"
/cog="ZnuB COG1108 274 ABC-type Mn2+/Zn2+ transport
systems, permease components"
/pfam="ABC-3"
/tigr="TIGR03770 anch_rpt_perm 270 anchored repeat-type
ABC transporter, permease subunit"
/product="metal ABC
transporter permease"
/translation="MLTQDFFINSLVAVVVISLVTGALGSFMIWQRLSYLGDSLSSH
LLGVALALIFKISPSLSIMLIAITFAILLSLNFNRLYSADTILNIVTNVVLSSSLVLM
SFLPSGNNSIISSFLFGDILTLDQSDIVLIFLTSAVVTLILIFRWRYWLMISINQDLAV
VEKINVTFRLEFLITLAIFIAIAAQLIGILLIAAFLIPAA SARLISKTPMQMIIVA
TVFSVISGISGLMLSASFDLLTGPAIILVAAVYLIIAYFIRLVLSRLA"
/besthit="qcoverage 100 , hcoverage 100 , similarity 100
, identity 99.6 , evalue 1.08e-156 , alnlength 266 ,
Bacteria;Eukaryota , Proteobacteria;Arthropoda ,
WP_010962536.1 MULTISPECIES: metal ABC transporter
permease [Wolbachia]"
gene 16779..16958
/locus_tag="wEsol_01187"
CDS 16779..16958
/locus_tag="wEsol_01187"
/codon_start=1
/transl_table=11
/fullproduct="qcoverage 100 , hcoverage 100 , similarity
100 , identity 100 , evalue 6.50e-34 , alnlength 59 ,
Bacteria , Proteobacteria , WP_010082539.1 MULTISPECIES:
hypothetical protein [Wolbachia]"
/translation="MSEEGFFSKYISQPVKKFYNYITGKTEESDDVAGDVHNIAQGDS
ESLDTHVQSNENDII"
/product="hypothetical protein"

```

/besthit="qcoverage 100 , hcoverage 100 , similarity 100  
 , identity 100 , evaluate 6.50e-34 , alnlength 59 ,  
 Bacteria , Proteobacteria , WP\_010082539.1 MULTISPECIES:  
 hypothetical protein [Wolbachia]"  
 gene 16964..>17784  
 /locus\_tag="wEsol\_01188"  
 CDS 16964..>17784  
 /locus\_tag="wEsol\_01188"  
 /codon\_start=1  
 /transl\_table=11  
 /fullproduct="qcoverage 100 , hcoverage 82.7272727272727  
 , similarity 100 , identity 100 , evaluate 1.04e-187 ,  
 alnlength 273 , Bacteria , Proteobacteria ,  
 WP\_015589088.1 MULTISPECIES: DNA polymerase III subunit  
 delta [unclassified Wolbachia]"  
 /cog="HolA COG1466 334 DNA polymerase III, delta subunit"  
 /tigr="TIGR01128 holA 314 DNA polymerase III, delta  
 subunit"  
 /product="DNA polymerase III  
 subunit delta"  
 /translation="MRVTPSKVKKFLEKPDALRGVLIHGSDNSRVDFYVQEIIANLGE  
 YSVQVMDFAIVNKSPSLLFSELANVSMFTSKKLIKLINVSGGISKELKNVLDYNASGH  
 YVMMVASDLPYNSATKSYMESSKIFGVIACYKDSNSNLYDIISSYLKQNDIKCTNEII  
 YHLQSYFNHSKLPICSELEKLVLYLGERKDKLTDIELCFSTSGNDYATLDDLCSAIA  
 SKDMLRFIRISDALVSQENFSPIALIRIISNYFLRLNVLLSVQGGMSEQAIDQ"  
 /besthit="qcoverage 100 , hcoverage 82.7272727272727 ,  
 similarity 100 , identity 100 , evaluate 1.04e-187 ,  
 alnlength 273 , Bacteria , Proteobacteria ,  
 WP\_015589088.1 MULTISPECIES: DNA polymerase III subunit  
 delta [unclassified Wolbachia]"  
 gene 8753..8835  
 /locus\_tag="wEsol\_tRNA-24"  
 tRNA 8753..8835  
 /locus\_tag="wEsol\_tRNA-24"  
 /gene="tRNA-Leu"  
 /intronpos="0..0"  
 /program="tRNAscan-SE"  
 /cove\_score="68.2"  
 /evidence=predicted  
 /type="Leu"  
 /anticodon=CAA  
 /product="tRNA-Leu (CAA)"

# ORIGIN

```

1 tactattaaa aatctgtttt ttgaagctac ttcttagttc actagcctta ttgtaaaaat
61 aatctctgta ataccttcta atactgctgt tgctaatagt atttacatat tccatgaact
121 tgtgctcaag aattgaatat ttttccggag caagtttttc ataattttgc aaattgctat
181 cgattatgtg atgccataaa tattcagaat gcagttttgt tgaatggtca agagcagtca
241 acacgtcttc tttcttgat gccagttcgt tacatatatc gtatggatct ttattacttg
301 gcaaagtcac aaactttaac gtgtatccag gctctaatat tggcagagca agttctgcaa
361 ctcgagtagc agcatgacgt ccagcactat cgccatccat acagatggag atttctttag
421 caaatctcca tagatttttt atctgctctg cagaaattgc ggtaccaagc ggagcaactg
481 cattactaat tcctgcttga tgtagcgcta tagcgtccat atatccttca acaacgagta
541 tgtgctgttt ttacgtatt tcgcttaaag caaagtttaa tccgtataaa ttctccctct
601 tcttaaagag ctgactctct ggactgttta aatatttcgg ctgttgctca gaacttagca
661 cacgtccgcc aaaaccaata actctccctg caatgctctg tataggaaat atcagccggt
721 cataaaaata atcatgaaaa tttttgttta ctaatccaat atcaatcaaa attctgtcct
781 caatacctga agagtttaaa tactctttca aaccagagct tggatgcataa cctatcttaa
841 atttatctat gatttttaggt gaaatcttac gctgctttta ataatctaca acaccttgat
901 ttttttgtgc aaaccaatth gcagctaaat caagcgctaa aaatagttta ttgtcctctt
961 ttgtaatact aagacttttt gggcagttca acacctgtaa ccgatgctaa tcttttccaa

```

|      |             |             |             |             |             |             |
|------|-------------|-------------|-------------|-------------|-------------|-------------|
| 1021 | tgcttctttta | aagcttaatc  | cttcagtttg  | tgaaataaat  | tcaaattgcat | caccactagc  |
| 1081 | caagcaacca  | aaacagtaat  | ataacccctt  | agtattgctc  | accgaaaaag  | atggggtttt  |
| 1141 | ttcgttatga  | aatggacaga  | gcccaacaaa  | actatctcct  | ctttttatta  | atctgacttt  |
| 1201 | tttacctact  | atgtcggata  | ataataatth  | tgattttata  | atatctatat  | gatccatctt  |
| 1261 | gttaaattag  | tagtaggata  | aaaattatat  | agaattttata | cacatctgac  | tcgaaattta  |
| 1321 | tttctataac  | taaagcaatt  | tagattttacc | gacaatgtag  | ctatacaaat  | tcaagagcaa  |
| 1381 | tcctgtcatc  | caggtagccc  | acagaaacaa  | aaaacttcct  | tgacaaacct  | cgccagcgcc  |
| 1441 | cttatcatga  | aactgaagct  | atthattttat | cttctctgta  | cagattaaat  | gacaaaaaaa  |
| 1501 | ctcaacgtat  | ctggcgtctc  | atgttttaatt | ttttgacta   | tgtgcacctt  | atgtctttat  |
| 1561 | caaattttccg | ggttttgacc  | tacacaagct  | gaaatacgct  | tataaagcat  | ttaaaacatt  |
| 1621 | aaaaaacgcc  | aacttaaaaa  | atggatagtg  | aataactagc  | taccctaggg  | tttcttttgc  |
| 1681 | ctttttttct  | gttttagtaaa | tttcttaacg  | tttataatth  | agattagttg  | cagcttaaaa  |
| 1741 | gcagctaaat  | cgcggttatt  | aagtgttttag | aataaaaaaa  | cgccatactt  | gaaagtataa  |
| 1801 | tgtaagtaat  | tagccaacca  | cggggcttct  | tttgcccttt  | ttttcgtttg  | gtaaatttct  |
| 1861 | taatattttat | acagaaggtg  | tcattccagt  | gcttgacact  | ggaatccagt  | tcttattata  |
| 1921 | cagctatctg  | gtgtacttat  | ttaaaattaa  | gttttctgga  | tctcagtgcc  | aaagcactgg  |
| 1981 | gatgacaccc  | ttcctggcgg  | agattattct  | caaatcacaa  | tgttcgtaca  | gttgtggaat  |
| 2041 | gaattgcggg  | atgacgtagg  | aaaaccttag  | ctatagctth  | agaactccca  | aaaggtcaga  |
| 2101 | agcattgaat  | gacttgacag  | aaagttcaaa  | cccatataaa  | atgtccttat  | ttcttatatg  |
| 2161 | ttaggtatag  | tatcaattgc  | ctcagatcat  | gctgggttatg | aattaaaaatc | agaaataaaa  |
| 2221 | ccttacctgg  | aagccctagg  | ttacagagta  | gtagatcaag  | gctgcactgc  | taagcaaaag  |
| 2281 | tgtgtagatt  | acccaaacta  | tgctgttaaa  | gttgtagaag  | atataacaag  | caaaaaagca  |
| 2341 | aattatggga  | tattaatttg  | tggtacaggt  | ttgggcatga  | gtactgtggc  | aatcgtttt   |
| 2401 | gaaggaatct  | acgctgctth  | atgtaacagt  | gttgagatcg  | caaaattagc  | tcgcgagcat  |
| 2461 | ggcaacgcaa  | atgtactgtg  | tcttggtgca  | gggtttactg  | cgagtggatt  | agcaaaagac  |
| 2521 | atagtcaaac  | aattcctcga  | aacagaatth  | tcaaaagaaa  | gcagacataa  | aaaacgcctt  |
| 2581 | gataaactca  | gcaatataac  | ctctaagaaa  | aaaaaacaaa  | aacttataac  | gaagatgaaa  |
| 2641 | tatcaaaatt  | cgctaaaaatg | gcaggccagt  | gggtgggatga | gaacggcaaa  | ttcaaaccat  |
| 2701 | tgcacatgat  | gaatcctgtt  | agagtatctt  | acattattga  | gaaaataaaa  | gagttaaaaa  |
| 2761 | aatgcaatth  | aaaagaatta  | tcattgcttg  | atgtcgggtg  | tggtggtggc  | atthttgtcag |
| 2821 | agtcaatggc  | acgcgtttggc | attaacgttg  | tgggaaataga | tgtatgtgaa  | gaaaacataa  |
| 2881 | aagtagcgca  | ttcacatgca  | aaaaaagtag  | ggttaaaatat | agaatatata  | cacaccagca  |
| 2941 | ttgaagagct  | aagcaatgac  | aagaagtacg  | acgtgggttct | gttgatggaa  | gtagttgaac  |
| 3001 | atgtggataa  | tttagagctt  | ttcatgaaaa  | aagcgataga  | actgctaaaa  | ccggaggggt  |
| 3061 | taatctthtat | atccacaata  | aatagaacta  | tcaaatcctt  | ctgccttgca  | ataattgggtg |
| 3121 | cagagtacat  | attaaatttg  | ctgccaaaaag | gtacacataa  | ctggaataaa  | tttctcaagc  |
| 3181 | cgtcagaaat  | tgcaaatcac  | ttaagagaaa  | ataatgtaac  | gctgcaaaac  | atggctggca  |
| 3241 | tggagtacaa  | cgtaataaaag | cgtgagtggga | atctaactaa  | aggcgtggat  | gttaattata  |
| 3301 | tactctgcgg  | tttgtttagat | ttaaactctat | aaaagcacca  | ttttcacttc  | caatactthtg |
| 3361 | aaggatctth  | gccagcttht  | atacagtagc  | ctthattagt  | tagcgcccaa  | ccggaacgac  |
| 3421 | aagcataacc  | tgtacctaca  | cgthcatatc  | caggagcagc  | aacacactth  | ccattctcca  |
| 3481 | aggtttgacc  | tttaaaaaaga | caacaaactt  | ctthttctgt  | tacctthgtt  | acaatttgag  |
| 3541 | gagcaccaaa  | aaacacagca  | acaaacatac  | ccagtgcgaa  | aagtgcaggc  | caaggcattc  |
| 3601 | tgccaaatat  | tgcaagtaag  | cttgaaccaa  | ttattaccac  | tgtaatcatt  | ggtccacctt  |
| 3661 | ttccatgaac  | gtaaccttatt | acattacaca  | ttacatctgt  | tgctccatca  | gcgtgtgcat  |
| 3721 | caaatgcata  | gaaaactata  | aatagaatta  | caagaaaatt  | tctcattgtt  | ctthcaataa  |
| 3781 | tcatgcctga  | ttgtthctta  | ttthtaataa  | atthcagtaa  | atagctthtt  | tcaaaaatta  |
| 3841 | tgcttaaccc  | aatcaatatt  | tattttattac | tgctthttta  | atactataat  | taactcagtt  |
| 3901 | gattthttatc | aaaatgctaa  | accatggaa   | aattcgagaa  | ctthttacatc | accacgccag  |
| 3961 | tatattacgt  | aaacgataag  | ccgcatattg  | gtcatgcata  | cactthctctc | ttgtgtgacg  |
| 4021 | tgggtggcaag | gttcatgaaa  | ctagctggga  | aaaatgtcaa  | atthaccacc  | ggtacagatg  |
| 4081 | aacatggaca  | aaaaatagaa  | aaagcagcta  | aagcaaagga  | aatgcagcca  | aaagaattta  |
| 4141 | cagatgatgt  | gagcgtthtca | tttaagaat   | tggtctaagtt | catgaattth  | gagtatgacg  |
| 4201 | atthttattcg | cactacggag  | gaacgtcaca  | aaaaagcagt  | tatagcttht  | tggaatagac  |
| 4261 | ttgaagagag  | agggcaaaata | tatttggtatt | cctattcggg  | ttggtattca  | gttctgtgatg |
| 4321 | aagcatttht  | tcaggaatca  | gagctgatag  | atggcaaagc  | accaacaggc  | gcagaagtth  |
| 4381 | agtggataaa  | agaagagagc  | tactthtttht | gcttgtaaaa  | ctggcaagac  | aaattactgg  |
| 4441 | aactctataa  | aaatcagcca  | agthtttatct | ttcctgagag  | cagaagaaat  | gaagtgatat  |
| 4501 | cgthttgtaag | atcagggctc  | attgacctct  | caatctctcg  | cactagthtt  | aactggggaa  |
| 4561 | taaaagtacc  | aggtaatgac  | aaacacgtaa  | tctatgtctg  | gatagatgca  | ttaaccaatt  |

|      |             |             |             |             |            |             |
|------|-------------|-------------|-------------|-------------|------------|-------------|
| 4621 | atcttacatc  | aataggttta  | cctagtactg  | aaggtgagga  | atataagagg | ttttgggcag  |
| 4681 | aaccagaaac  | acagattcca  | gtgtcaagca  | ctggaatgac  | accaaaccac | gggaaaacgc  |
| 4741 | agattccagt  | gtcaagcgct  | gcaaaccctag | ctgacaactc  | tttcaacggt | catgtaatcg  |
| 4801 | gtaaagacat  | attgcgcttt  | catgctgtat  | attggccagc  | gattctcctt | gcagcagacc  |
| 4861 | taccactgcc  | aaaacaaatt  | gcagttcatg  | gttggtggtt  | gaacgagggg | gagaaaatat  |
| 4921 | ccaagtccct  | tggtaatgtc  | atagatccaa  | ttggcctcgc  | tcaagagttt | ggtgttgatc  |
| 4981 | agctacgcta  | ttttctcctc  | agggaagcaa  | gcttcggcca  | agatggcaac | tttagtaaga  |
| 5041 | aaaatatgat  | cagccggata  | aattcagaac  | tggcaaacaa  | cataggcaat | ttagtgc aaa |
| 5101 | gaacaatttc  | atttttacac  | aagcaatggt  | ctggaattgt  | accaacaatc | gatcaaagcc  |
| 5161 | tacttaaagg  | tgaagaaagt  | cttcagggtt  | gcaaagctat  | actcgatcaa | gtgatgaatc  |
| 5221 | acctatcaaa  | gtatgaattt  | aaccatatca  | tacttcta at | catcaacatc | tcttctgaag  |
| 5281 | caaatgccta  | catagacaaa  | agtgcaccct  | ggacactaag  | caaaactgac | agagagcgca  |
| 5341 | tgaatttagt  | aattttacaag | ttactggaat  | atatcaggat  | aataggcatt | ttattgcagc  |
| 5401 | caatcgttcc  | caagtcagca  | gagatgatac  | taaatcaact  | gcaaattccg | aaagaacaac  |
| 5461 | gagatttaaa  | atctctgtgc  | gacgcgtgcg  | taagctttca  | ggcataacat | tgccataaacc |
| 5521 | tacgccggtt  | tttttgaggg  | ttgatgctaa  | agaggagaaa  | tagtgtaaaa | actattttctc |
| 5581 | ctggatggga  | ttatcttttag | ttaacgacgg  | tgcacaccgc  | tgtctacata | ttcaagttag  |
| 5641 | gtggcaagtg  | ccttagttac  | tttagcacia  | tatggtttag  | taacatcagc | acctatcact  |
| 5701 | actacttcag  | tcattgccga  | cttaaccctt  | cctaggctcc  | atgcaaacca | gccttgacca  |
| 5761 | ttttcttctt  | tagttggctg  | actttctggg  | ctagaaatct  | cagtaccctt | ttcatcacca  |
| 5821 | gattctgcat  | cataaaatac  | atcctgatcc  | tcagaaagac  | tcattaaata | acttttagca  |
| 5881 | gcatcaacat  | ttaaatgatc  | aggttgctta  | ggaacgttat  | caatattcat | ctgattttcc  |
| 5941 | tggctaggag  | tctcagtttt  | taaattttct  | tgtgtagcca  | cattcttttt | ttcatcagtt  |
| 6001 | tgctctctta  | aaaattgcct  | taccatcttc  | tgttttttctc | taaacaaaaa | atcaaataat  |
| 6061 | attggagaaa  | gctctagctt  | tgccccctct  | ggaataacaa  | taccattacc | ttgagattca  |
| 6121 | cttgaaagtt  | gactagcacc  | acttgcttga  | tctgccttat  | taccaaacat | caagttttta  |
| 6181 | acactattcc  | agtatggtga  | aaatttttct  | gagacccatg  | aaaattctat | tttagttgat  |
| 6241 | ggcatagtat  | cataaacact  | ttttaatcta  | tttccaacac  | tactaattgt | cccttttgct  |
| 6301 | gactcaattg  | atgtatcaca  | gtgtttttca  | gctgcttcca  | aagctttaag | tgcacttttt  |
| 6361 | actggttcaa  | atgagtacat  | aaacataatt  | taagccatct  | ttaacaatac | gattacacga  |
| 6421 | ccactaataa  | ctgcttttct  | ttgtacaagt  | aaatgctttt  | tcagatgctg | tttcgatatc  |
| 6481 | ctttgcaaac  | tcactgatgg  | catgtatcat  | acaaccctat  | ttttaatgcg | tttatttcca  |
| 6541 | acacttttaa  | tttccctttt  | gctgtgaata  | atgcttgctc  | ttagtttgta | cttcgaaatc  |
| 6601 | tctcttagta  | agctgctggt  | tatgctatca  | aattctaccg  | cattactgct | gagaagcatt  |
| 6661 | aatccttctg  | ttgcagcaat  | cattttttgct | tctaaaaaat  | tcccgatctt | tctcagaaat  |
| 6721 | agtttttatct | ttatcttcta  | tctcttttgct | tgattgccag  | ttgagtattt | ttttggatat  |
| 6781 | ttctttttact | ttctcagaaa  | atttttacct  | tagcttctac  | tttacttttt | catcgaaagc  |
| 6841 | tgagcttctt  | ctcagaaata  | gtttttgttct | tactaaactgc | tgcatacgaa | agtgc aatag |
| 6901 | ctacagcaga  | aaatacagca  | ccaccaataa  | taaatggaag  | gccaaacact | aatgctgcaa  |
| 6961 | ctggagctaa  | gaaaccaata  | taaggagctg  | cagcaaacac  | tccagatgct | aataaagtga  |
| 7021 | aagtagccag  | agttccagct  | atataatagg  | gtacattggt  | tttattcatc | atctcacgta  |
| 7081 | ttataaaaata | taataaccatt | ataaaaggat  | ttttaagaag  | ttgtcaagct | atctttacat  |
| 7141 | aaaaaaaaatt | tcgataaaact | tgggaacaag  | aagattgctg  | ccaagctatg | aactatgcct  |
| 7201 | ttccgtgtaa  | tctttgaaatg | cacctctggt  | agagtcaaaa  | tatagcttca | cactgccaat  |
| 7261 | tgggtccattt | ctctgctttg  | caataatgag  | ctctgcaatg  | tttctaattt | tttccatttt  |
| 7321 | ctcttgccat  | tcccgatggt  | tattgtttcc  | ttcatttggt  | tgttttctta | gttcataata  |
| 7381 | ctcttctcta  | tagagaaaaca | ttactatata  | tgcgtcttgc  | tctatgetcc | ctgaatcacg  |
| 7441 | taaatcagaa  | agttgtggtt  | ttttatcata  | cctctgctca  | acagaacgag | agagctgaga  |
| 7501 | tagtgcaaca  | atgggaatat  | ttagctcctt  | tgcaattgct  | ttcaaaccct | gcgtcacttc  |
| 7561 | cgagattttct | tgcactctat  | tttcattact  | cctttttggt  | gttcctctga | ttagctgcaa  |
| 7621 | ataatcaatg  | aataccactt  | ctacattata  | taattgatac  | agcaagcgta | ttctggtgcg  |
| 7681 | aagggcacta  | attgatagcg  | caggggtgtc  | atctatgatg  | aaaggcaggt | cagataattc  |
| 7741 | tgtactagta  | ttgataaaatt | catgcaattc  | aaaatcacta  | attctcccgg | ttaatgcctt  |
| 7801 | ataataacta  | attcctgaat  | ctatagtgat  | cagccttgca  | gttaattgct | ctgctgacat  |
| 7861 | ttcaagcgag  | aaaaacgcta  | catagtgttg  | ctttatctgc  | tcttttttgc | aacatcttac  |
| 7921 | aagcattaag  | tgcaatgttt  | agcgccaatg  | ctgtttttacc | catagaaggc | cttgcaagta  |
| 7981 | aaattaataa  | atcagatttt  | tgtagaccac  | caagaagctg  | atthagatct | tgaagtccgg  |
| 8041 | ttgtaacgcc  | tagcgcttct  | ggattatttt  | tcagtgtgct  | gatcttctca | actacatctt  |
| 8101 | taattgaact  | tgcaagtttt  | atatatgttt  | tctcaccttg  | tttttttact | gccaaattga  |
| 8161 | acaattttgt  | cattgcttgt  | tcaattttgcg | cctgtgcagg  | attttcaata | tcgtagtgtg  |

|       |             |             |             |             |             |             |
|-------|-------------|-------------|-------------|-------------|-------------|-------------|
| 8221  | agctatcacc  | aactatcttct | tgcccgagct  | tgattaaaca  | tctccttaag  | taagtatcac  |
| 8281  | ggattattct  | agtcaaacta  | taaatatcaa  | gtgcaatact  | tgcccttcgct | gcaagctttg  |
| 8341  | ctaagtactc  | taccccacca  | cattcggtaa  | acgcttggtc  | gttctcaaaa  | aacattttga  |
| 8401  | ggctcagttc  | attggcaact  | ataccgtgtt  | tcttggtttt  | agatatttgc  | gtaaaaatac  |
| 8461  | tttgatgcag  | tggatcatag  | aaatcttctg  | ctgtaattgt  | gtcttcaact  | gcatcacaga  |
| 8521  | ttctattatc  | acgaatcatt  | gcaccaataa  | gcatctgttc  | agcttctaga  | ttatgcggta  |
| 8581  | atttacatat  | ttccttgtct  | acacttcttg  | aactgaggag  | attggctaata | tcattcattt  |
| 8641  | taagttttga  | gagtaactgt  | tgattattgt  | agaatattta  | gtcctcattt  | gaaagatgta  |
| 8701  | aaggcaaaaa  | aatttgacta  | attccgtgtt  | gcctatagca  | ttaaaactta  | atgcccttgt  |
| 8761  | ggtggaatgg  | tagacacggc  | agactcaaaa  | tctgttgctt  | gcaaaagcat  | gctggttcaa  |
| 8821  | gtccggccag  | gggcacgtta  | aatattggaa  | agtatatata  | tgttacataa  | atcttttaata |
| 8881  | cgttttattt  | ctatcttttc  | ttctataaat  | gttattcaaa  | aggtaaagaa  | agatgaaaat  |
| 8941  | gggatattgt  | atgtaacggg  | cctcaggcgc  | tatatatcag  | tattgcttga  | tttgattatt  |
| 9001  | atcgttttgt  | tcttgacgtt  | ttgcagccaa  | gccttaaata  | agctctttat  | gaactcagag  |
| 9061  | gatagcaaaa  | tattaagtca  | aattgctgca  | aaataccaaa  | tgcaagtgcc  | actgtctata  |
| 9121  | gaagaaaaga  | caacgcagag  | tagacttgta  | aactatggat  | cctaaatcaa  | atagtccagt  |
| 9181  | ttattatgct  | cttttgctat  | gttacatata  | tgtgggtaaa  | gtttgctact  | acacctggaa  |
| 9241  | aactattatt  | tgggcttaga  | gttggtgatg  | cacaaacttt  | cgaaaagatg  | accctaaaac  |
| 9301  | aagcaacaaa  | gagatttttt  | tcctttatat  | tgtcagttgc  | accattgttc  | ttgggctttt  |
| 9361  | tatggtcaaa  | tttcaacaaa  | cgctgtcaaa  | cttggcacga  | taagatcgca  | ggcacagtgg  |
| 9421  | ttgtcacgag  | taaaagcctt  | agaaggcaga  | gctaaaaact  | acttgacacc  | cttcgccagc  |
| 9481  | cccttttatca | tgatactgaa  | ggtattcatt  | tatcttcaat  | ctgtgcagat  | taaacgacaa  |
| 9541  | cagtattacg  | tattggcgtc  | ttatctttta  | ttttttgcac  | tatgtgcatg  | cactgggatg  |
| 9601  | acacctctgg  | gcactgccgt  | cgtaaaggaa  | ccagtgtcag  | ctactcgtat  | gacaaaggag  |
| 9661  | gacagtgtct  | cagctacttt  | catgacacca  | tttgcgtgct  | ttaaaaatga  | atgttcttac  |
| 9721  | aattgtgcgt  | catgcgcttt  | attaaatatt  | ttacttaaaa  | atctaatttc  | ttattataca  |
| 9781  | agagataagc  | aattcattga  | tgatgaaaaa  | ttacaaaaag  | gggcatagaa  | agcgcctaag  |
| 9841  | agagaaaatt  | atcttagata  | atggacaatc  | attacttgat  | tatgagggtt  | tagagcacat  |
| 9901  | tttatattca  | gcatacagta  | gaattgatgt  | aaagccgata  | gcaaagagtt  | tgatagaaaa  |
| 9961  | ttttggcagt  | ttgaataaag  | tttttaaatgc | tgacctggaa  | gcgctgcaaa  | acgttgatga  |
| 10021 | tgtcagcaat  | gcagcgatat  | ctgccatctt  | ttgtgtaaaa  | caagcctttg  | ttcgttctgc  |
| 10081 | aagagaagaa  | ataaaaaacc  | tgccctgtaat | cgataactgg  | gaaaaattgc  | ttgattattt  |
| 10141 | aagaataagt  | ataggaagcc  | tcaataagga  | aaatcttctg  | gtcatctata  | tgaataaaaa  |
| 10201 | gtatcgtcta  | atagcggaag  | acctgcaaaa  | tattggtaca  | gtagatcaaa  | ctcctcttta  |
| 10261 | tgtcagagag  | atcatcgagc  | gcgcactttt  | gattggttca  | acatccattg  | taatattctca |
| 10321 | caatcatcca  | agcggagata  | cacaaccttc  | aaatagcgat  | atatctctca  | ctagacaact  |
| 10381 | agcagaagct  | tgccaaaagta | taggaataga  | attaatagac  | cacattatta  | ttacattcag  |
| 10441 | tagctatttt  | agttttcaag  | aaaatagggt  | gttggtgaaag | ccttttatagc | tacagtaact  |
| 10501 | tagattttacc | gacaatcgtc  | attccgctac  | gtgttagcgg  | ctaagagata  | ccgtgaatga  |
| 10561 | atcgcggtat  | gacgtagatt  | gctgtcatcc  | cgctgcttgt  | tagcggctga  | gataccgccg  |
| 10621 | cggtatagta  | actcgtcatc  | ccgctacgtg  | ttagcggcgc  | ggtgggtatga | cggtaagatt  |
| 10681 | tattgtggca  | tgatggtgta  | gtataatgtt  | gataaacctc  | agttacttta  | gctataaacg  |
| 10741 | attaagatga  | agttatcata  | tatctatata  | cttacaataa  | aagctaatag  | cacattatat  |
| 10801 | attggtgtaa  | ctgcaaatct  | gatcaagagg  | atcttggaac  | acaaaaacaa  | aattgtttca  |
| 10861 | ggtttttacat | caagatatata | tgtaataaaa  | cttggtatatt | ttgaagagtt  | tgaagatata  |
| 10921 | agtttagcta  | ttgcaagaga  | aaggcgcttg  | aaagaatggc  | caaggcagtg  | gaaaattaat  |
| 10981 | ttgatcaatc  | aaaagaatcc  | tagctgggtt  | gacttatatt  | acttagcttt  | aagatagcta  |
| 11041 | tgctgagatc  | ccgctacacg  | tagcgggatg  | acgagaaaag  | agtggcggtta | tgacggttcg  |
| 11101 | cgcgcatga   | cgataagctc  | gtccaaaaga  | atcctagctg  | ggttgactta  | tattacttag  |
| 11161 | ctttaagata  | gctatgctga  | gatcccgcga  | acacgtagcg  | ggatgacgag  | aaaggagtgg  |
| 11221 | cggatagacg  | gttcgcggtg  | gtatgacgta  | gtagctattt  | cttgcaatca  | agtttcgtta  |
| 11281 | aaagtcagat  | tgaatgggtta | aatcttccac  | ccaaaataacc | acgcactcta  | cttgcttgtt  |
| 11341 | tggatatatt  | tcttgtaacta | aggttttata  | gattaacatc  | tgttttttta  | tttcatttaa  |
| 11401 | taaggaaaca  | gaaacgttac  | ggtgtgactt  | gtagtcaatt  | atgattgctt  | tatcttgcgt  |
| 11461 | tatgcatagc  | ctatctagtc  | gtactaatac  | tggttcgcca  | tcgattattc  | cactcagtgt  |
| 11521 | aatctctgat  | ttgccttcct  | aagtcaaaca  | aatagccata  | tttttcatta  | aaggctaata  |
| 11581 | ttttactgta  | aatttcattcc | ttatcttcat  | gctgtgatgt  | tatcaaggta  | ttttctgacc  |
| 11641 | caattttttc  | tcctttcttt  | ttctatcttg  | ggcatatact  | gcaatatgct  | gtgaattatt  |
| 11701 | aggcctcttg  | tataaccatc  | tgtcatccca  | gtgctctttt  | gtttttgtca  | ttcagtagct  |
| 11761 | agacctgctt  | ttttctctag  | gttccagcgt  | cacgcgctgg  | gaatgacact  | gatagggttg  |

|       |             |             |             |            |             |             |
|-------|-------------|-------------|-------------|------------|-------------|-------------|
| 11821 | gctgtggaag  | agaaatgacc  | ggaacgtcaa  | agtaatcacg | ttttttataa  | atgtaagggg  |
| 11881 | agtttgcgtt  | cacacatagc  | acttcaactt  | tttctttaaa | tattggccgt  | aagctgcttg  |
| 11941 | tttcttttca  | tatgatgtct  | ccatactgag  | tgattaaatc | ataccaagag  | cccttttgca  |
| 12001 | ctggctcttt  | gcttaagatg  | tataactcat  | cttcagcacg | cgtgagtgtc  | acgtataata  |
| 12061 | aacgcaaata  | ttcattataa  | tcctctagtt  | ttttctctct | ttttacttga  | tcgcaataag  |
| 12121 | cgttggtgtt  | ttttccacac  | caaaatgggtg | cttccgttcc | atcaaagata  | atgctttcac  |
| 12181 | tgtttcttgg  | cactgtgttt  | gtatcaacca  | aaaatactat | gggagcttgc  | agaccttttg  |
| 12241 | atttgtgaat  | tgtcattatt  | cgcacagcat  | tgcgttctga | ttgcatatca  | ttcttaatct  |
| 12301 | ccggattatt  | ctccttgatc  | cattgaacaa  | acgcttgaag | agatgggttt  | tcaaattgca  |
| 12361 | acacgaggtt  | cataaattcg  | tctaggacct  | caaagcactc | aagacctagc  | cttgacgcaa  |
| 12421 | atctcttctt  | acctgtgctg  | aatatatgtg  | taaatagtgc | aagaggagac  | tctatgctgag |
| 12481 | ataagttaat  | gagatagttt  | aattcactat  | agataaccac | agaataatcc  | tgaattcttt  |
| 12541 | cccatagtga  | atgctcttta  | cggtcgtatg  | caatgttaaa | taaatcatcc  | tcggtaaaaa  |
| 12601 | tgaatagcgg  | tgatttttaa  | gcatttgcaa  | gagctaaatc | atgtgctgga  | ggagtaaaaa  |
| 12661 | ctcagccaaa  | gctattaagt  | cctgcacggc  | tatatagtcc | ataattctaa  | aataatcccg  |
| 12721 | gcctacaact  | ggcacatttg  | cttttttaag  | ttcgcttatt | atgtaatcaa  | ctaacacgtt  |
| 12781 | tcgttgctgc  | acaaaaatca  | taatgtctct  | tggctctata | tggcgatctt  | tagcgactaa  |
| 12841 | aatccgccct  | tcgtttaacc  | aattgtgaat  | tctgttagct | attgtttgag  | caagtaatcg  |
| 12901 | atctgctatt  | gtataaccct  | ccttgcatgt  | cagaggaatt | tgtaaagctc  | gctgttcttt  |
| 12961 | ctctttgcgc  | cttggtaacg  | ctggccaaat  | ttcaatatat | ccttggtcat  | tttctctatg  |
| 13021 | tggaacatgt  | tttatttcat  | tatcattaaa  | agatatttct | gcgcggaagt  | tattaaatat  |
| 13081 | tctatctaca  | agcatcaaaa  | cttctggagt  | tgagcgaaat | gacttttcaa  | gttggcatga  |
| 13141 | tatccaatct  | ctaccaccag  | ttttcgtatg  | aaagtattgt | tgcatatagt  | tgaatagatg  |
| 13201 | gggatttgct  | ccttgaaatc  | tgtatatgta  | ttgttttacg | tcaccaacta  | caaataaggt  |
| 13261 | tcgcttttca  | tcattaccgg  | caaaaaattc  | atcgcagaga | tttgttataa  | ttttccactg  |
| 13321 | gctgatgcta  | ttgtcttgtg  | cctcatcaac  | aaggatgtga | tctatttttt  | gatccaagtt  |
| 13381 | aaacaatatc  | caatctttat  | agtttggtat  | gctgagaaga | tttgttgcta  | agccaattat  |
| 13441 | atcattgtag  | tcaagcagtg  | cattttttga  | tttttcgcta | ctgtatagat  | caacatatac  |
| 13501 | tttaaataata | ccaagtaagc  | tactggttct  | cttgaatatt | tgataagagt  | tcatgtctct  |
| 13561 | tatatgggta  | aatactacat  | tctgaacgct  | ctctattatt | tgctctgcat  | ctttgaattt  |
| 13621 | ctccaaaata  | ctttttgttg  | caatggatga  | tatgctcttt | ttttcgtgcg  | attctgattt  |
| 13681 | tagaaatacc  | ttggctaggt  | tttctatttt  | ggtgtcattc | cactttattc  | cgggtgtcatc |
| 13741 | cgagtagctg  | acactgggtc  | tttttttctg  | gatcccagct | gggatgacag  | tagaataaag  |
| 13801 | tatttccacta | taactctgat  | ctcttttact  | gccttcactt | aatatctcgg  | ctagtcttcc  |
| 13861 | acgtgctcaa  | ttgtttcact  | ctgtaagtca  | tgaattccat | ctggggcgct  | caatttatct  |
| 13921 | ttgatataatt | tcgaatcatt  | tgctgacatc  | gatcttttta | cacataaagt  | ataaaagcaa  |
| 13981 | tcgcgtagtt  | tatttttcac  | aatttcagtt  | gcaataaggt | tgatatcatc  | ctgcacagtt  |
| 14041 | tcgttatgaa  | gcacttttatt | gaatatgatg  | gaatgtaatt | ctttacattc  | actcagcgtg  |
| 14101 | caatttgagg  | caatgccagc  | ttttatggga  | aagctggaaa | ttaatttgta  | acagaaagcg  |
| 14161 | tgtatgggtt  | gtatagtttag | accaagattt  | tccagttcag | agaaaagcct  | tcttgctctt  |
| 14221 | gttaaataat  | ctttattttt  | tctggatccc  | agtgtcacgc | actgggatga  | caagtagggg  |
| 14281 | tacatcgga   | agaaatctag  | ttgttccaga  | tccattatta | attcactatc  | tgaacatatt  |
| 14341 | gccacttac   | tgagtatgct  | gtgaatgcga  | ttctccatct | cgtttgctgc  | agcattgggtg |
| 14401 | aatgttaagc  | aaagaatatt  | tcttttgttt  | tctaataaaa | gtctcaatac  | tctgtctatt  |
| 14461 | aagatttttg  | ttttgcctgt  | accagcggac  | gcattttacc | acacagagaa  | attaggattt  |
| 14521 | atggcatttg  | atctcatcag  | aagtgcgaga  | accttataaa | agttgactag  | aatagcatta  |
| 14581 | tacatataat  | gtaaaaatag  | tgttagtga   | gatataata  | gaaaagtttt  | tgtgtaaagg  |
| 14641 | cgcttgcaaa  | aatcaatctt  | tttttgcatg  | ttgtagacaa | aaaagaaaca  | gggtatcact  |
| 14701 | tgattgaagg  | tttatttgtc  | tttgctaate  | tctctaattt | tttggaata   | aaagtaggtg  |
| 14761 | agaaggattc  | tagatacgat  | aactctacag  | ttgaatttat | aaactccgag  | tctagaataa  |
| 14821 | ataaccagta  | taacactgta  | atgaaagcgg  | ttaatctgct | gcttaggcac  | gctcctgtac  |
| 14881 | gcactaaagt  | cactgtaaa   | gttgtaaaaa  | acataccaat | tgctgcagga  | cttggtagcg  |
| 14941 | gatectcaga  | tgctggagct  | gtggtacgta  | cgctagggaa | gctgtgggag  | attgatagga  |
| 15001 | cgatttttaa  | tgaaatagcc  | ttaaacgttg  | gtgctgatgt | tcccgcgaagc | gtagatagca  |
| 15061 | agccagtttt  | tgtagaggtt  | attggcgaag  | aattatgcca | cattaaaaaa  | ttctctttac  |
| 15121 | ctacaaatgt  | ggtgcttgtg  | aaaccgaaaa  | aaagggtttt | gagtacacca  | gaggatattt  |
| 15181 | ccaaacatga  | aggaaaaattt | tctgagccaa  | ttaaatggag | cgatgacgct  | gaaaaggatt  |
| 15241 | tgttgaagct  | tcttaaagag  | acgagaaacg  | atcttcaaga | aatagcaata  | agctttgtac  |
| 15301 | ctgaaattaa  | ggatgtgata  | tcaacacttg  | agtcacaaga | aggctctata  | ctttttcgca  |
| 15361 | tgtcaggcag  | tggtgtatca  | tgttttggaa  | tattcgatag | tgaggaaaaa  | gcaaaagctg  |

```

15421 ctgcagttaa tatcggaaaa aagcaaccag aatgggtgggt atgtgacact caattaatag
15481 tttgacttat gcccttaatt tccgagaata aaaatcctat aaatgggttac agggaaggaa
15541 aatttttgggt gaataataga gaatattgcg gctcaattat aatttttcctt gaaaagggtga
15601 ttaaattgaa agaaagtgat ataaatagca aggaacattt taaatctttt ttaacagagg
15661 aaatagaaat tttgataata ggtactggta aaacacgcaa tatactaagt tcttcagtga
15721 agtcctatct tatggaacaa aaagggttaa attttgaatt tatgacaaca gggttctgcat
15781 gcagaaccca taacgtttta atatccgaag atagatttgt tgtcagttat ctaatagcca
15841 tatagcatgc ttaccagga ctttttcatac aatagtctag ttgcagtagt tgtaattagc
15901 ctagtaacag gcgcttttagg atcgtttatg atatggcaaa gggttatctta tcttggtgat
15961 agtttgtccc attcttcggt gcttgggtgtt gcacttgctt taatctttta gattagccca
16021 tcgcttagca taatgctcat tgcaattaca tttgctatac tactttctct taattttaac
16081 agattatatt ctgctgatac gatattgaac attggtacca atgtagtttt atcatcgagt
16141 ttagtactta tgtcttttct tccatctggc aataatagta ttattagctc actgtttgggt
16201 gatataattaa cgctcgatca aagtgatata gtattgattt ttttaacctc tgcagtagtt
16261 actttgatat taatatttag atggcgttat tgggttaatga tttcaattaa tcaagattta
16321 gcagtagttg aaaaaattaa tgttaccttt gttagactag aatttttaat cactcttgct
16381 atatttatag caattgctgc ccaactaata ggaatattac tcattgctgc atttttgcta
16441 ataccagcag catctgcaag gctcatttcg aaaactccaa tgcagatgat tattgttgca
16501 acagtttttt ctgtgatctc tgggatatca ggtctcatgt tatctgcaag ttttgatttg
16561 ttaactggac ctgcaattat acttgttgca gcggtatatt taattatcgc ttattttata
16621 aggctagtat taagcaggtt ggcttaattt tgatctcgaa tgttaataat tttgtaatat
16681 actcattata aaacatcact atcttagcac aaaatagttt ttgctatact attatttata
16741 tgctaattgat aagttgttaa ttttatggag taagcaatat gagcgaagaa ggattttttt
16801 ccaaatatat atctcaacct gtgaaaaaat tttataatta tattacagga aaaacagaag
16861 agtcagatga tgtagcaggt gatgtgcata atattgcaca aggagactca gagtctttgg
16921 atactcatgt acagtcaa atgagaatgata tcatatagat agcatgaggg tcacaccatc
16981 caaagttaaa aaattcctag agaaacctga tgctttacgt ggtgtgttaa ttcattggaag
17041 tgataacagt aggggttgatt tttatgtaca agaaataatt gctaatttgg gtgagtattc
17101 agttcaggtg atggattttg caatagtga taagtacccc agtttactgt tttctgaatt
17161 ggcaaacggt tcgatgttta ccagcaaaaa attaatatag ctgataaatg tgagtggagg
17221 tatatccaaa gagttaaaaa acgtattgga ttataacgca agtgggtcact atgtaatgat
17281 ggtagcaagt gatcttccat ataattctgc gactaaaagt tatatggaga gttcaaaaat
17341 ttttgggtgt attgcttgct ataaggacag caacagcaat ctttatgaca ttatatcaag
17401 ttacttaaaa caaaatgata taaaatgcac aaatgagata atctaccatt tgcaatctta
17461 ctttaatcat agcaagctgc ctatatgttc agaacttgag aagttagttt tatacttagg
17521 ggagagaaaa gacctaaaac ttactgat atagaattatgc ttttcaactt cccggcaacga
17581 ctatgctaca cttgatgatt tatgttctgc catagcaagt aaagatatgt tgcgcttcat
17641 tagaatttct gatgcattgg tatcgcaaga aaatttttca ccgatagcgc taattcgcatt
17701 tatatcaaat tatttcctac gccttgaaaa cgtttttgctg tcagtgcgaag gtggaatgag
17761 tgagcaggct gcgattgatc agct

```

//

```

LOCUS      JAQZAU010000104          46040 bp    dna        linear    ENV 17-MAR-2023
DEFINITION MAG: Wolbachia pipientis isolate wEsol contig_51892, whole genome
            shotgun sequence.
ACCESSION  JAQZAU010000104  JAQZAU010000000
VERSION    JAQZAU010000104.1
DBLINK     BioProject: PRJNA929258
            BioSample: SAMN33142973
KEYWORDS   WGS; ENV; Metagenome Assembled Genome; MAG.
SOURCE     Wolbachia pipientis (insect metagenome)
ORGANISM   Wolbachia pipientis
            Bacteria; Pseudomonadota; Alphaproteobacteria; Rickettsiales;
            Anaplasmataceae; Wolbachieae; Wolbachia.
REFERENCE  1 (bases 1 to 46040)
AUTHORS    Fiutek,N., Couger,B.M., Roy,S., de la Torre,J.R. and Connor,E.F.
TITLE      Genomic assessment of the contribution of the Wolbachia
            endosymbiont of Eurosta solidaginis to gall-induction
JOURNAL    International Journal Molecular Sciences
REFERENCE  2 (bases 1 to 46040)
AUTHORS    Fiutek,N., Couger,B.M., Roy,S., de la Torre,J.R. and Connor,E.F.

```

TITLE Direct Submission  
 JOURNAL Submitted (10-FEB-2023) Biology, San Francisco State University,  
 1600 Holloway Ave, San Francisco, CA 94132, USA  
 COMMENT ##Genome-Assembly-Data-START##  
 Assembly Date :: JUN-2019  
 Assembly Method :: FLYE v. 06-2019  
 Genome Representation :: Full  
 Expected Final Version :: Yes  
 Genome Coverage :: 100.0x  
 Sequencing Technology :: Illumina HiSeq; PacBio Sequel  
 ##Genome-Assembly-Data-END##  
 FEATURES Location/Qualifiers  
     source 1..46040  
         /organism="Wolbachia pipientis"  
         /mol\_type="genomic DNA"  
         /submitter\_seqid="contig\_51892"  
         /isolate="wEsol"  
         /isolation\_source="galls on Solidago altissima"  
         /host="Eurosta solidaginis MN-2018-EFC"  
         /db\_xref="taxon:955"  
         /environmental\_sample  
         /country="USA: Cowling Arboretum, Carleton College,  
         Northfield, MN"  
         /lat\_lon="44.48 N 93.13 W"  
         /altitude="280 m"  
         /collection\_date="2018-11"  
         /metagenome\_source="insect metagenome"  
         /note="metagenomic"  
     gene complement(244..405)  
         /locus\_tag="wEsol\_01189"  
     CDS complement(244..405)  
         /locus\_tag="wEsol\_01189"  
         /codon\_start=1  
         /transl\_table=11  
         /fullproduct="qcoverage 100 , hcoverage 100 , similarity  
         98.1 , identity 98.1 , evalue 4.57e-27 , alnlength 53 ,  
         Bacteria , Proteobacteria , WP\_153801315.1 MULTISPECIES:  
         hypothetical protein [unclassified Wolbachia]"  
         /cog="Tra5 COG2801 232 Transposase and inactivated  
         derivatives"  
         /pfam="rve"  
         /product="hypothetical protein"  
         /translation="MSSSINKQLVMDSLLMAVNRKPKAKNLLLHSDQGSQYTAQGYQY  
         LLAVKNIDE"  
         /besthit="qcoverage 100 , hcoverage 100 , similarity 98.1  
         , identity 98.1 , evalue 4.57e-27 , alnlength 53 ,  
         Bacteria , Proteobacteria , WP\_153801315.1 MULTISPECIES:  
         hypothetical protein [unclassified Wolbachia]"  
     gene complement(828..1130)  
         /locus\_tag="wEsol\_01190"  
     CDS complement(828..1130)  
         /locus\_tag="wEsol\_01190"  
         /codon\_start=1  
         /transl\_table=11  
         /fullproduct="qcoverage 100 , hcoverage 100 , similarity  
         98.0 , identity 98.0 , evalue 1.41e-60 , alnlength 100 ,  
         Bacteria , Proteobacteria , WP\_081818090.1 transposase  
         [Wolbachia endosymbiont of Glossina morsitans morsitans]"  
         /cog="COG2963 COG2963 116 Transposase and inactivated  
         derivatives"

```

/pfam="HTH_Tnp_1 HTH_23 HTH_28"
/product="transposase"
/translation="MVREYTAEFKLEAVKLANEQRKAGQTITKIAKDLGIKGGLLGKW
IKKHNEKKSAADAFPGRGNMAPYDKERFDLQSKSNKRKRHFKKSPGQSKRVKYFFI"
/besthit="qcoverage 100 , hcoverage 100 , similarity 98.0
, identity 98.0 , eval 1.41e-60 , alnlength 100 ,
Bacteria , Proteobacteria , WP_081818090.1 transposase
[Wolbachia endosymbiont of Glossina morsitans morsitans]"
gene 1243..1809
/locus_tag="wEsol_01191"
CDS 1243..1809
/locus_tag="wEsol_01191"
/codon_start=1
/transl_table=11
/pfam="Pfam-B_11632"
/fullproduct="qcoverage 100 , hcoverage 95.4314720812183
, similarity 100 , identity 100 , eval 8.02e-127 ,
alnlength 188 , Bacteria , Proteobacteria ,
WP_227738582.1 hypothetical protein [Wolbachia
endosymbiont of Drosophila simulans]"
/translation="MIKKEYQRRVLENKNDESSEKKFARRENQIKEGIEKLMEYYSQ
ENAGEKGYISEEEFKQTMKMKERLQGIIEEKKKVVDQKAVEKGISLIINSIKNFYSS
VKSNNLEQLDWQTKRGIIKALIGQINIGCDQVEVGFQIEEPAQDGGILNLYHCTTHNK
GVGEGCQASFFVSINLDFSVMRWNDNVR"
/product="hypothetical protein"
/besthit="qcoverage 100 , hcoverage 95.4314720812183 ,
similarity 100 , identity 100 , eval 8.02e-127 ,
alnlength 188 , Bacteria , Proteobacteria ,
WP_227738582.1 hypothetical protein [Wolbachia
endosymbiont of Drosophila simulans]"
gene complement(1990..3459)
/locus_tag="wEsol_01192"
CDS complement(1990..3459)
/locus_tag="wEsol_01192"
/codon_start=1
/transl_table=11
/fullproduct="qcoverage 100 , hcoverage 100 , similarity
100 , identity 100 , eval 0.0 , alnlength 489 ,
Bacteria , Proteobacteria , WP_015588939.1 MULTISPECIES:
Asp-tRNA(Asn)/Glu-tRNA(Gln) amidotransferase subunit Gata
[unclassified Wolbachia]"
/cog="GatA COG0154 475 Asp-tRNAAsn/Glu-tRNAGln
amidotransferase A subunit and related amidases"
/pfam="Amidase"
/tigr="TIGR00132 gatA 466 aspartyl/glutamyl-tRNA(Asn/Gln)
amidotransferase, A subunit"
/product="
Asp-tRNA(Asn)/Glu-tRNA(Gln) amidotransferase subunit
GatA"
/translation="MNELRKLSITQMHDGLKKKSFSFAVELVEAHISAVENEKLNAFIT
KTPEIAMKAAKADEYFSRQKDDLISPLMGVPGIKDLFCTKGIKTTACSKMLENFVP
TYESTVSDLLLKSGAAMLGKLNMFAMGSANTNSYFGPVENVWIRKSDGEKVVPGGS
SGGSAASVAGFLCAGALGSDTGGSVRQPAAYCGVVGKPTYGRCSRFGMIAFASLDQ
AGVITRSVSDSALMLEAICGYDTKDISSRKPAPKFSSFINGDVKGKRIGIPKEYRMD
GISEEIVHNWEKVASYLKENGAEVVDVTLPHTKYAIPVYYLICSAETSSNLARYDGVR
YGFRVDADTLEEMYSLTRAEFGKEVKRRILIGAYALSSGHHNEYEKAQCIRALIRN
DFIKAFEKIDYILVPSAPTEAFGLNEKPDPLIMCINDVFTVPASLAGLPAISVPVGLS
NEGLPLALQVIGNYYDEAGILNVASVIEQNCGRRIIRPLA"
/besthit="qcoverage 100 , hcoverage 100 , similarity 100
, identity 100 , eval 0.0 , alnlength 489 , Bacteria ,

```

Proteobacteria , WP\_015588939.1 MULTISPECIES:  
 Asp-tRNA(Asn)/Glu-tRNA(Gln) amidotransferase subunit GatA  
 [unclassified Wolbachia]"

gene 3849..5075  
 /locus\_tag="wEsol\_01193"

CDS 3849..5075  
 /locus\_tag="wEsol\_01193"  
 /codon\_start=1  
 /transl\_table=11  
 /fullproduct="qcoverage 100 , hcoverage 100 , similarity  
 100 , identity 100 , evalue 1.81e-288 , alnlength 408 ,  
 Bacteria , Proteobacteria , WP\_015588940.1 MULTISPECIES:  
 tRNA (N(6)-L-threonylcarbamoyladenosine(37)-C(2))-  
 methylthiotransferase MtaB [unclassified Wolbachia]"  
 /cog="MiaB COG0621 437 2-methylthioadenine synthetase"  
 /pfam="UPF0004 DUF2183 Radical\_SAM"  
 /tigr="TIGR01579 MiaB-like-C 416 MiaB-like tRNA modifying  
 enzyme"  
 /product="tRNA  
 (N(6)-L-threonylcarbamoyladenosine(37)-C(2))-  
 methylthiotransferase MtaB"  
 /translation="MNEVITFGCRLNFYESELIKEALKKAKRENVVVHSCAVTNEAE  
 RQVKQKIRKIYKNDPNKEIIIVGCAVQLDPEVYSSIPGVSKVLGNQDKLKAENYLLND  
 DKILVSDNQVEPVLINGFEDKSRAFIEIQNGCNHSCFTCSITEARGNNRSPINSIIE  
 QIRIFVENGYQEVVFTGVDITDFGTDLLGKPSLGSMIRRVLKDIPELKRLRLSSIDVA  
 EVDDDELMDLIANESRLMPHLHLSLQSGNNLILKRMKRRHNREQVIEFYHKMKSLRPNI  
 AFGADIIAGFPTETDEMFDQTDVLLKKINVVYLHAFYPYSERKNTPAARMPQIPENVRK  
 ERVKHLREVNKEMMSFYQSLLSTEQSVLVEQNHIGRTENFALVKLEPKAQAKSIVKV  
 NVKGVENNYLIGSILP"  
 /besthit="qcoverage 100 , hcoverage 100 , similarity 100  
 , identity 100 , evalue 1.81e-288 , alnlength 408 ,  
 Bacteria , Proteobacteria , WP\_015588940.1 MULTISPECIES:  
 tRNA (N(6)-L-threonylcarbamoyladenosine(37)-C(2))-  
 methylthiotransferase MtaB [unclassified Wolbachia]"

gene 5122..6054  
 /locus\_tag="wEsol\_01194"

CDS 5122..6054  
 /locus\_tag="wEsol\_01194"  
 /codon\_start=1  
 /transl\_table=11  
 /pfam="OmpW OMP\_b-brl PagL Surface\_Ag\_2"  
 /fullproduct="qcoverage 100 , hcoverage 100 , similarity  
 99.7 , identity 99.7 , evalue 2.57e-218 , alnlength 310 ,  
 Bacteria , Proteobacteria , AGJ99753.1 Surface  
 antigen-related protein [Wolbachia endosymbiont of  
 Drosophila simulans wHa]"  
 /translation="MIIMGSFVITKISIALFLIFIPCVYFFITYISNSTHIEQVQPLK  
 LETDNDES VIRSEEVTAKIPIKYQELESSPPSVFQVADQKNMWSRIADQAEPTKEKS  
 KKLDFYVSANGGKVYHDNSEIFVKGIKAIGERVLT LVESHYGFIIKNIVADEIKSIQQ  
 FDGKIDFQWFSSMSLGYYAGENGKIDFEAAYS IANIEDSNSPPVFDKSASIFAFLNLF  
 YYNPSVQDTQFAPYIGLGIGPTVFRLKRINGSPQNSMPLNVPWFAYQIKLGVDSIIP  
 EIKTFLGYRYFSVPIPVADDISTHNIIEVGLIFNF"  
 /product="Surface antigen-related protein"  
 /besthit="qcoverage 100 , hcoverage 100 , similarity 99.7  
 , identity 99.7 , evalue 2.57e-218 , alnlength 310 ,  
 Bacteria , Proteobacteria , AGJ99753.1 Surface  
 antigen-related protein [Wolbachia endosymbiont of  
 Drosophila simulans wHa]"

gene complement(6062..7549)  
 /locus\_tag="wEsol\_01195"

```

CDS      complement(6062..7549)
          /locus_tag="wEsol_01195"
          /codon_start=1
          /transl_table=11
          /pfam="Secretin"
          /fullproduct="qcoverage 100 , hcoverage 99 , similarity
100 , identity 99.8 , evaluate 0.0 , alnlength 495 ,
Bacteria , Proteobacteria , WP_174515744.1 MULTISPECIES:
secretion system protein [Wolbachia]"
          /translation="MAIFKCLILLFIISCTHLPKQYPINIDNYKHDYPLQQYNTSLE
INEPAIPEIMPLPIEFPLTISNQLISINVSEEVSIKDLLIEIGKLSVDNLDMDPKIS
GNIILKLKDKDINEVIQSIANSACLRYSTSNQVIRIEQDLPAQNYVDFINIQHSAQ
SSFVINNNITNSDGSNVDRDYNNVMKSQYSSDLWNSLEKGLNAIMDVNGVDDGEFLSS
NREAGVILNARKDIHKAVEEYINKVKKLASSQVMIEAKIVEVVLDDKYLSGMNLNDL
QDGTAKSIINQDNSIINLAMNFGANDLGDLVKNLDFGTSTVISSPRVHAINNQAMIS
FTKNHIYFTSDIQKDRNSNQTLITKMNSVPIGVVLIHPSINIDTSEIFMDIHPTLS
RINGYTKDPDIEYVAQQSKMKLNSDIPIVEIREMNSMLKIKSGEIMVIGGLIEHREDK
QSLHQQSKRLANNIRTVETVIFLKATIVPTFGLLDRKDKNLYIY"
          /product="secretion system
protein"
          /besthit="qcoverage 100 , hcoverage 99 , similarity 100 ,
identity 99.8 , evaluate 0.0 , alnlength 495 , Bacteria ,
Proteobacteria , WP_174515744.1 MULTISPECIES: secretion
system protein [Wolbachia]"
gene      complement(7683..9047)
          /locus_tag="wEsol_01196"
CDS      complement(7683..9047)
          /locus_tag="wEsol_01196"
          /codon_start=1
          /transl_table=11
          /pfam="Ank_2 Ank_4 Ank_5 Pfam-B_10896 Pfam-B_14646 Ank_2
Ank_4 Ank_5 Ank_3 Ank Pfam-B_1714 Pfam-B_10896 Ank_4
Ank_5 Ank Ank_3 Ank_4 Ank_2 Ank_5 Ank Ank_4 Ank_3 Ank
Ank_3 Ank_4 Ank_5 Ank_2 Ank_5 Ank_2 Ank Ank_3 Ank_4 Ank_2
Pfam-B_1714 Ank_5 Ank Ank_3 Ank_4 Ank_2 Ank_5 Ank Ank_3
Ank_2 Ank_5 Ank Ank_3 Ank_4"
          /fullproduct="qcoverage 100 , hcoverage 100 , similarity
100 , identity 100 , evaluate 9.66e-231 , alnlength 454 ,
Bacteria , Proteobacteria , WP_141457199.1 MULTISPECIES:
ankyrin repeat domain-containing protein [unclassified
Wolbachia]"
          /translation="MAREEDINQLVENGFDINSKDGITLLHKFTKEGDLVGKSLLE
HEADFNVDNENRNPLHYAIMHGHKKVAKLFFVNQLTINSKDKNGFTPLHLAALQDDT
ELIDFLITKGAKINEKDVEGYTPLHIASLYGSKSVQILIDSGANLECEDNNFRTPL
FLTIIYQCTAHYDSRAEIIIEYLIKKGANIEAKDAENNTTLFLAAYNNKMQIVKLIKKQ
QASNDKIKLKEFFCTKNNHGFDAIDCAIEHNNRKMVTFVLVSKGIDANDQDFNGNARLH
KASHNGNTKTVKLLRLKVNINAVTKCNRTPLLLAVKKGHTKIVKMLLEVNRANMNICE
QQGFAPLHLAVQKDYFDIAQLLIEKGADLNKCNNGHTAIDMFISKAHSSKNIEENYK
KFCRFLMLYLKELHSHKHKACCILSTLALSITIIGLPFIFKPIIKYRERSKIYKKTAM
LVYI"
          /product="ankyrin repeat
domain-containing protein"
          /besthit="qcoverage 100 , hcoverage 100 , similarity 100
, identity 100 , evaluate 9.66e-231 , alnlength 454 ,
Bacteria , Proteobacteria , WP_141457199.1 MULTISPECIES:
ankyrin repeat domain-containing protein [unclassified
Wolbachia]"
gene      complement(9753..10385)
          /locus_tag="wEsol_01197"
CDS      complement(9753..10385)

```

```

/locus_tag="wEsol_01197"
/codon_start=1
/transl_table=11
/fullproduct="qcoverage 100 , hcoverage 100 , similarity
100 , identity 100 , evalue 6.98e-148 , alnlength 210 ,
Bacteria , Proteobacteria , WP_227738592.1 septal ring
lytic transglycosylase RlpA family protein [Wolbachia
endosymbiont of Drosophila simulans]"
/cog="RlpA COG0797 233 Lipoproteins"
/pfam="DPBB_1"
/product="septal ring lytic
transglycosylase RlpA family protein"
/translation="MSSCSFSNRFNCTAGHYKIGSSYTINGITYYPKNCKHYEEIGTA
SWYGIEDHGTLTANGEVFNRLHLSAAHKTLPPLCFVLVTNLENGRKLVTNRVNDRGPF
EGRIIDLSEKAAQVLGFHKSLAKVKVQYLRKMSEQLIQNTPHYRKQYEKEIQKRHPK
QDSAESKGYVAFFKSAQAASKLRNQGIKNVRLLFKNDQYCVKVSYSR"
/besthit="qcoverage 100 , hcoverage 100 , similarity 100
, identity 100 , evalue 6.98e-148 , alnlength 210 ,
Bacteria , Proteobacteria , WP_227738592.1 septal ring
lytic transglycosylase RlpA family protein [Wolbachia
endosymbiont of Drosophila simulans]"
gene 10454..11950
/locus_tag="wEsol_01198"
CDS 10454..11950
/locus_tag="wEsol_01198"
/codon_start=1
/transl_table=11
/fullproduct="qcoverage 100 , hcoverage 100 , similarity
100 , identity 100 , evalue 0.0 , alnlength 498 ,
Bacteria , Proteobacteria , WP_015588945.1 MULTISPECIES:
UDP-N-acetylmuramate--L-alanine ligase [unclassified
Wolbachia]"
/cog="MurC COG0773 459 UDP-N-acetylmuramate-alanine
ligase"
/pfam="Mur_ligase Mur_ligase_M Mur_ligase_C"
/tigr="TIGR01082 murC 449 UDP-N-acetylmuramate--alanine
ligase"
/product="
UDP-N-acetylmuramate--L-alanine ligase"
/translation="MRILNYTIINLVMSKHLNINKTQEGIIHIIGIGGIGMSAIAE
ILHNSNYKVQGSDAQSNNNVDRQLQKLGIEVYIGHNADNISQAQIVVYSSAIESDNVEL
IAAKNNNKIVLHRSMDLAELLRDKYVIAVSGSSGKTTTTAMIASIFDHSSIDATVTVG
GILNSYKS NFKLGGSDTFLIEADESDGTMKIPAKIAVITSINNDHIDYYGTFDNKN
AFSQFVNAGSAVLPDSVDIDYDAGNSITFGFENGSI RASNIKQHANSIEFDVLNNWI
PALRAGMTKGKCTEMSSQCVTLGSSPLKNIVLSNAIGIHKVSNALAAISVAIKLGISD
AEIKKGLLEFQGVARRFSLIADIKGVKLIEDYAHHPNEIYATLTAARSITKGKVGII
EPLRFARIRNFFDEFIRIFMMFDYVILTPVHPPEDNPPIPGCGIDDIQKALISNGFNNT
KIMNDALLISHFISDSTSPSDIVLFIGAGSNI AKLAKETAALIAEVKV"
/besthit="qcoverage 100 , hcoverage 100 , similarity 100
, identity 100 , evalue 0.0 , alnlength 498 , Bacteria ,
Proteobacteria , WP_015588945.1 MULTISPECIES:
UDP-N-acetylmuramate--L-alanine ligase [unclassified
Wolbachia]"
gene 11955..13229
/locus_tag="wEsol_01199"
CDS 11955..13229
/locus_tag="wEsol_01199"
/codon_start=1
/transl_table=11
/fullproduct="qcoverage 100 , hcoverage 100 , similarity

```

```

100 , identity 100 , evalue 5.76e-300 , alnlength 424 ,
Bacteria , Proteobacteria , WP_015588946.1 MULTISPECIES:
phosphopyruvate hydratase [unclassified Wolbachia]"
/cog="Eno COG0148 423 Enolase"
/pfam="Enolase_N Enolase_C MAAL_C"
/tigr="TIGR01060 eno 425 phosphopyruvate hydratase"
/product="phosphopyruvate
hydratase"
/translation="MNKIINNVFAREILDSEGYPTIEVEIELCDGAIGRASVPSGAST
GKLEALELRDQDEKRYCGKGVLKAVQAVNGIIADEIIIGMNAADQNAIDKALIELDGTK
NKSCLGANATLGVSLAVAKAAANSFKMPLYRYLGKQTSVMPVPLINIINGGVHADNK
LDFQEFMILPVGAETTFSEAIRISAEVFNLSILKKKGYSINVGDEGGFAPNIESTEE
ALDLIIYAIESAGYSAQSDFALGLDVASSTFYEDGIYEFESKGLTSEELTEYYCNLVE
RYPPIISIEDAMSEDDYEGWKLTLAKLGNKIQLVGDDLFTVNCCELIRKGIEEKMANAVL
IKPNQIGTLTETFNAIEMAKSNGYKAVVSHRSGETEDTTISHIAVASNCGQIKTGSL
RSDRLAKYNELMRIESTLGKDAKYRGLAWVL"
/besthit="qcoverage 100 , hcoverage 100 , similarity 100
, identity 100 , evalue 5.76e-300 , alnlength 424 ,
Bacteria , Proteobacteria , WP_015588946.1 MULTISPECIES:
phosphopyruvate hydratase [unclassified Wolbachia]"
13217..14239
/locus_tag="wEsol_01200"
gene
13217..14239
CDS
/locus_tag="wEsol_01200"
/codon_start=1
/transl_table=11
/fullproduct="qcoverage 100 , hcoverage 100 , similarity
100 , identity 100 , evalue 2.65e-242 , alnlength 340 ,
Bacteria , Proteobacteria , WP_174515741.1 MULTISPECIES:
GTPase ObgE [unclassified Wolbachia]"
/cog="Obg COG0536 369 Predicted GTPase"
/pfam="GTP1_OBG MMR_HSR1 FeoB_N"
/tigr="TIGR02729 Obg_CgtA 329 Obg family GTPase CgtA"
/product="GTPase ObgE"
/translation="MGFIDEVKLCLKAGDGGDGCASFRREKFVEFGGPNGGNGGKGGN
IVFISDANLNTLLHFRYRRHIKADSGKNGAGRDRSGTAGKDVILKVPVGAQIIIEESE
EIIIVDLDPGMEFQVAQGGKGGNGNTNFKSSTNKAPRHFTYGPGEKHVLLKLKVL
DVGIIGMPNAGKSKFLTRCSNSDTKVGDPFTTVRPHLGMVKVDDSEVVIADIPGIIT
DAHLGVGLGHKFLKHIERCQILLHLIDVTHDDVVSAYSICIHNELELYNSDLVEKEEIV
VLNKC DLLREAEILEKKNHLANYLNKEVLC LSINGDLQPILRL LSEKLKKSNSKEIDV
YDPFKM"
/besthit="qcoverage 100 , hcoverage 100 , similarity 100
, identity 100 , evalue 2.65e-242 , alnlength 340 ,
Bacteria , Proteobacteria , WP_174515741.1 MULTISPECIES:
GTPase ObgE [unclassified Wolbachia]"
14715..16109
/locus_tag="wEsol_01201"
gene
14715..16109
CDS
/locus_tag="wEsol_01201"
/codon_start=1
/transl_table=11
/fullproduct="qcoverage 100 , hcoverage 100 , similarity
100 , identity 100 , evalue 0.0 , alnlength 464 ,
Bacteria , Proteobacteria , WP_015588948.1 MULTISPECIES:
class II fumarate hydratase [Wolbachia]"
/cog="FumC COG0114 462 Fumarase"
/pfam="Lyase_1 FumaraseC_C"
/tigr="TIGR00979 fumC_II 458 fumarate hydratase, class
II"
/product="class II fumarate

```

```

hydratase"
/translation="MDRKTRIESDSLGEVKVPSEHYWGAQTQORSLENFKIGTEKMPEP
LIKALAIVKLAAAHVNMKQGSIDNKVGDAICAAAKEVIDGKFNNFPLVVWQTGSGTQ
TNMNMNEVISNRAIEILGGNLGSKSPIHPNDHVNYGQSSNDTFPTAMHIAAADQINRL
LIPNLEKLHKVLDNKVQEFKDIKVGRTHLQDATPLTLGQEFSGYAAQIKKGIERVKS
TLSDIYELAQQGTAVGTGLNTKKGFAEDFAKQVAGITNLPFTSAGNKFEALAANDALV
ELSGTLNTVAVSLMKIANDIRLLGSGPRCGIGEIMLPENEPGSSIMPGKVNPTQCEAV
TMVCTQVMGNHVAVTISGSNGHFELNVFKPVIIYNVLQSIRLLADASLNFTEKCVVGI
KANEERIKDLLNQSLMLVTILNTHIGYDNAAKIAKLAYKENITLKEAAAKLQLLTEEE
FERIVKPEEMVNYL"
/besthit="qcoverage 100 , hcoverage 100 , similarity 100
, identity 100 , evalue 0.0 , alnlength 464 , Bacteria ,
Proteobacteria , WP_015588948.1 MULTISPECIES: class II
fumarate hydratase [Wolbachia]"
gene complement(16304..16627)
/locus_tag="wEsol_01202"
CDS complement(16304..16627)
/locus_tag="wEsol_01202"
/codon_start=1
/transl_table=11
/fullproduct="qcoverage 100 , hcoverage 100 , similarity
100 , identity 100 , evalue 2.00e-70 , alnlength 107 ,
Bacteria , Proteobacteria , WP_006280013.1 MULTISPECIES:
Grx4 family monothiol glutaredoxin [Wolbachia]"
/cog="COG0278 COG0278 105 Glutaredoxin-related protein"
/pfam="Glutaredoxin"
/tigr="TIGR00365 TIGR00365 99 monothiol glutaredoxin,
Grx4 family"
/product="Grx4 family
monothiol glutaredoxin"
/translation="MSNFEQIKKIDITENDVVLYMKGTSDFPQCGFSGLVVSILKKLN
VKFYINVLENDEIRESIKKFSDWPTIPQLYIKEEFIGGCDITREMYEKGELQSLLKEK
KIIAE"
/besthit="qcoverage 100 , hcoverage 100 , similarity 100
, identity 100 , evalue 2.00e-70 , alnlength 107 ,
Bacteria , Proteobacteria , WP_006280013.1 MULTISPECIES:
Grx4 family monothiol glutaredoxin [Wolbachia]"
gene complement(16637..16861)
/locus_tag="wEsol_01203"
CDS complement(16637..16861)
/locus_tag="wEsol_01203"
/codon_start=1
/transl_table=11
/fullproduct="qcoverage 100 , hcoverage 100 , similarity
100 , identity 100 , evalue 3.25e-45 , alnlength 74 ,
Bacteria , Proteobacteria , WP_015588949.1 MULTISPECIES:
BolA/IbaG family iron-sulfur metabolism protein
[Wolbachia]"
/cog="BolA COG0271 90 Stress-induced morphogen (activity
unknown)"
/pfam="BolA"
/product="BolA/IbaG family
iron-sulfur metabolism protein"
/translation="MTIAIHELIERIIKQSFDPADIKIHDLAGDDDHHLKINSKCFLG
KTKIEQHKMVKALEGQSIHALQLETNTLK"
/besthit="qcoverage 100 , hcoverage 100 , similarity 100
, identity 100 , evalue 3.25e-45 , alnlength 74 ,
Bacteria , Proteobacteria , WP_015588949.1 MULTISPECIES:
BolA/IbaG family iron-sulfur metabolism protein
[Wolbachia]"

```

```

gene      17026..17898
          /locus_tag="wEsol_01204"
CDS       17026..17898
          /locus_tag="wEsol_01204"
          /codon_start=1
          /transl_table=11
          /pfam="Surface_Ag_2 OMP_b-brl"
          /fullproduct="qcoverage 100 , hcoverage 100 , similarity
100 , identity 100 , evaluate 1.60e-211 , alnlength 290 ,
Bacteria , Proteobacteria , WP_080717615.1 MULTISPECIES:
P44/Msp2 family outer membrane protein [Wolbachia]"
          /translation="MLTFSFRCLSYDDKINNLENVYIKANYFGAFFNAIGSLEGKEDA
GDNITEGVFSFNKKERIEAGYSPKYVPGFAGSAAIGYLFKNMRVEFEGLYSQTNLYDE
DYSDDKKARYIELRRHNDASTGAECNSPWRSGKVDIHIQENCSEAEFRAAFKMKNEG
FNNLAGMVNVYRDFNIAKMPFTPYPVGIGAGVTRVKFLGKTRYALAYQAKLGINHQLTA
QTQAFAGLRYFGILDNQFKDIVPGIKILAGEGYIPAGGGSKVDETARVESTTATITNR
FGIYGLEFGLVYHF"
          /product="P44/Msp2 family
outer membrane protein"
          /besthit="qcoverage 100 , hcoverage 100 , similarity 100
, identity 100 , evaluate 1.60e-211 , alnlength 290 ,
Bacteria , Proteobacteria , WP_080717615.1 MULTISPECIES:
P44/Msp2 family outer membrane protein [Wolbachia]"
gene      complement(17913..19235)
          /locus_tag="wEsol_01205"
CDS       complement(17913..19235)
          /locus_tag="wEsol_01205"
          /codon_start=1
          /transl_table=11
          /fullproduct="qcoverage 100 , hcoverage 100 , similarity
100 , identity 100 , evaluate 0.0 , alnlength 440 ,
Bacteria , Proteobacteria , WP_015588951.1 MULTISPECIES:
NADP-dependent malic enzyme [unclassified Wolbachia]"
          /cog="SfcA COG0281 432 Malic enzyme"
          /pfam="malic malic ELFV_dehydrog Malic_M"
          /product="NADP-dependent
malic enzyme"
          /translation="MNDDLSTTKQEALNYHSRGGKPGKISIMPTKPLSTQYDLSLAY
SPGVAAPCLEIAKNPEVIYDYTAKSNCVAVISNGTAVLGLGNIGPLAAKPMMEGKAVL
FKRFADIDAVDIEVG TENIEDFINAVRYLGP SWGGINLEDIRSPDCFIIEKRLNELMD
IPVFHDDQHGTAVVVAAGIENALDIVEKKLEDVKIIMNGAGAAGIACLEILKSMGAKN
IVLCDKQGVIYKGRNEDMNEWKEKYAIDTSERSLLDTIKGADVFIGLSAKDVLNEEML
KSMGKDPIIFALANPDPEVRPEFAKSVRPDAIIATGRSDYNNQVNNVMGFPYIFRGAL
DVHATTINDEMKIAAADAI AKLAREPVPGEISAVYGGKMGYGREYIIPFPDPRLLIS
IVAPAVAKAAVDSGVARKAIQDWSKYENQLKSRLSNVLSTLNLSSHM"
          /besthit="qcoverage 100 , hcoverage 100 , similarity 100
, identity 100 , evaluate 0.0 , alnlength 440 , Bacteria ,
Proteobacteria , WP_015588951.1 MULTISPECIES:
NADP-dependent malic enzyme [unclassified Wolbachia]"
gene      19316..19912
          /locus_tag="wEsol_01206"
CDS       19316..19912
          /locus_tag="wEsol_01206"
          /codon_start=1
          /transl_table=11
          /fullproduct="qcoverage 99.4949494949495 , hcoverage
99.4949494949495 , similarity 99.5 , identity 99.5 ,
evaluate 7.84e-130 , alnlength 197 , Bacteria ,
Proteobacteria , EAL58732.1
CDP-diacylglycerol-glycerol-3-phosphate

```

```

3-phosphatidyltransferase [Wolbachia endosymbiont of
Drosophila ananassae]"
/cog="PgsA COG0558 192 Phosphatidylglycerophosphate
synthase"
/pfam="CDP-OH_P_transf"
/tigr="TIGR00560 pgsA 183
CDP-diacylglycerol--glycerol-3-phosphate
3-phosphatidyltransferase"
/product="EAL58732.1
CDP-diacylglycerol-glycerol-3-phosphate
3-phosphatidyltransferase"
/translation="MNSGVLLYKFTYYVEWYYMLKKNVPNLLTISRALAVPAIILSFY
IENKYAGLITISIFVFACITDFFDGYLARAWKVQSKFGKLFDSIADKLIVVSTIIMLV
YKQKINDFTIVPSIIIIICREILVSGLREFLIATNVSLPVS KAGKIKTFLQMVAVALI
MNDYYMIQYTGAICLWVAIIITMWSGYNILAGIKQIG"
/besthit="qcoverage 99.4949494949495 , hcoverage
99.4949494949495 , similarity 99.5 , identity 99.5 ,
evalue 7.84e-130 , alnlength 197 , Bacteria ,
Proteobacteria , EAL58732.1
CDP-diacylglycerol-glycerol-3-phosphate
3-phosphatidyltransferase [Wolbachia endosymbiont of
Drosophila ananassae]"
gene 20024..20965
/locus_tag="wEsol_01207"
CDS 20024..20965
/locus_tag="wEsol_01207"
/codon_start=1
/transl_table=11
/pfam="DcuC DUF2207"
/fullproduct="qcoverage 100 , hcoverage 100 , similarity
100 , identity 100 , evalue 7.19e-206 , alnlength 313 ,
Bacteria , Proteobacteria , WP_015588953.1 MULTISPECIES:
hypothetical protein [unclassified Wolbachia]"
/translation="MKIPSGKFSSTKKVPGKNKKKRDFEPLLEEFFWDFWPTVDKEVKR
ERLEQELLALKKRELYRQCVSLVTMVPFALFMAIELEKICSDQVLLGVISGALSHTIL
PFTVLSLICTLYLIYNNRKIAQKERELEIIENGEEVKEKEHNISDIGQCLIYIEAITT
ALVIVGMIMGETSSLEAAEDAILFLANAIAFLATLVSYIDKHEKNKKKETEKSDLDEK
SSKKTSNISVAGLALAGSSIFLIRRIMLMALASSLNPAVGPTLGLIGIAIFMAVQILT
IHSYSKTLKDPKVEGRGESRNAGSSDRSYKEEGPAIA"
/product="hypothetical protein"
/besthit="qcoverage 100 , hcoverage 100 , similarity 100
, identity 100 , evalue 7.19e-206 , alnlength 313 ,
Bacteria , Proteobacteria , WP_015588953.1 MULTISPECIES:
hypothetical protein [unclassified Wolbachia]"
gene 21026..21733
/locus_tag="wEsol_01208"
CDS 21026..21733
/locus_tag="wEsol_01208"
/codon_start=1
/transl_table=11
/fullproduct="qcoverage 100 , hcoverage 100 , similarity
100 , identity 100 , evalue 3.83e-162 , alnlength 235 ,
Bacteria , Proteobacteria , WP_015588954.1 MULTISPECIES:
outer membrane protein assembly factor BamD [unclassified
Wolbachia]"
/cog="ComL COG4105 254 DNA uptake lipoprotein"
/pfam="YfiO TPR_18 Apc3 TPR_11 TPR_2 TPR_1 TPR_16 RPN7"
/tigr="TIGR03302 OM_YfiO 239 outer membrane assembly
lipoprotein YfiO"
/product="outer membrane

```

```

protein assembly factor BamD"
/translation="MYKTLITCFIFLICSFTQSYADDLEKTETELYEEAVELFDQKKY
KQAIRAFHKIEDLYPLSYWAMKAKLLSGVSHYNMGNYSAAASDMADYIYVYNGEDLP
YVYYLRVLSYMQINKVQLGQQTAYKTLELATEYINLFPGSEYVDEIKEKTKLITEHI
STKEYSIGKFYLRRGEYLAAIKRFQNMASYKDSKYFSKSINYLIAVHSAIGLDLEAEQ
YESMLLAENLQDAKPEA"
/besthit="qcoverage 100 , hcoverage 100 , similarity 100
, identity 100 , evalue 3.83e-162 , alnlength 235 ,
Bacteria , Proteobacteria , WP_015588954.1 MULTISPECIES:
outer membrane protein assembly factor BamD [unclassified
Wolbachia]"
gene 21794..22534
/locus_tag="wEsol_01209"
CDS 21794..22534
/locus_tag="wEsol_01209"
/codon_start=1
/transl_table=11
/fullproduct="qcoverage 100 , hcoverage 100 , similarity
100 , identity 100 , evalue 9.42e-173 , alnlength 246 ,
Bacteria , Proteobacteria , WP_015588955.1 MULTISPECIES:
YebC/PmpR family DNA-binding transcriptional regulator
[unclassified Wolbachia]"
/cog="COG0217 COG0217 241 Uncharacterized conserved
protein"
/pfam="Transcrip_reg"
/tigr="TIGR01033 TIGR01033 238 DNA-binding regulatory
protein, YebC/PmpR family"
/product="YebC/PmpR family
DNA-binding transcriptional regulator"
/translation="MAGHSQFSNIKHRKGAQDAKRSQKFTKLIREITVAAKQGLPDHE
LNPRLSAIFAARKENLPKDKIETAIKNATGNVAGENYEEIIQYEGHGPGSGTALIVHAL
TNNRNRRTASEVRYIFSRKGGNLGETGSVSYLFDHVGLIVYKAEGVNFDDLFSHGIELE
VLNIEENDKEGLHVITCEIKDFGKVRDAFYAKFGEPELARLSWQPKDLIEISDKELID
KLSALVEELEDNDDVQYVEGNFTFVDKL"
/besthit="qcoverage 100 , hcoverage 100 , similarity 100
, identity 100 , evalue 9.42e-173 , alnlength 246 ,
Bacteria , Proteobacteria , WP_015588955.1 MULTISPECIES:
YebC/PmpR family DNA-binding transcriptional regulator
[unclassified Wolbachia]"
gene 22641..23468
/locus_tag="wEsol_01210"
CDS 22641..23468
/locus_tag="wEsol_01210"
/codon_start=1
/transl_table=11
/fullproduct="qcoverage 100 , hcoverage 88.1410256410256
, similarity 100 , identity 99.6 , evalue 4.90e-196 ,
alnlength 275 , Bacteria , Proteobacteria ,
WP_015588956.1 MULTISPECIES: M23 family metallopeptidase
[unclassified Wolbachia]"
/cog="NlpD COG0739 277 Membrane proteins related to
metalloendopeptidases"
/pfam="Peptidase_M23"
/product="M23 family
metallopeptidase"
/translation="MTTESDRKLLFISSTIKSSFFATEGLAPNTVVKLINIYKDFGVD
FKKDIVPESKLEVLFRLPNNQKTEEKILYASLTINKKAISLYHYKSQDGKERYFNKE
GISLKNGEIFANPLNGDYRISSEKFGNRKHPVRGKIAFHKGVDYAAKLGTPIIYAAAEV
IEYIGKNGGYGNYIKIKHKNEYSTCYAHISRFSGDIKLGSKVKQGQVIAYVGSTGVAT
GPHLHYEVIYNGKHIDPLTIAHKTEVKLPDHELREKLFVNKINKTINREGSSEKEV"

```

```

/besthit="qcoverage 100 , hcoverage 88.1410256410256 ,
similarity 100 , identity 99.6 , evalue 4.90e-196 ,
alnlength 275 , Bacteria , Proteobacteria ,
WP_015588956.1 MULTISPECIES: M23 family metallopeptidase
[unclassified Wolbachia]"
gene 23452..24321
/locus_tag="wEsol_01211"
CDS 23452..24321
/locus_tag="wEsol_01211"
/codon_start=1
/transl_table=11
/pfam="Band_7"
/fullproduct="qcoverage 100 , hcoverage 100 , similarity
99.7 , identity 99.7 , evalue 6.85e-192 , alnlength 289 ,
Bacteria , Proteobacteria , AGJ99770.1 SPFH domain/Band 7
family protein [Wolbachia endosymbiont of Drosophila
simulans wHa]"
/translation="MKKKFKDNMDKNTINDRNLSQLRFFPVLIALLGLILSLFLAYDS
TIALGVAAVSILTFLQGFFINDPNEARVIEFFGHYIGTYFKSGICVTLPFSSKYIVSL
KFQNINTEKIKVNDANGSPIEISAVIVWRVNSPAKAYYNVNNYHEFVFVQSDSVIREL
ASNYPYDSESEESLRKNSDKISDELRSMLQQRLDIAGIEITEARISHLAYSSIEIAQA
MLRRQQAHAI TSARRHIVQNAIGIVEEVIAHF EKNKSLQLD GKGQKVQLINLLVALIS
EQDAQPKISLDNN"
/product="SPFH domain/Band 7 family protein"
/besthit="qcoverage 100 , hcoverage 100 , similarity 99.7
, identity 99.7 , evalue 6.85e-192 , alnlength 289 ,
Bacteria , Proteobacteria , AGJ99770.1 SPFH domain/Band 7
family protein [Wolbachia endosymbiont of Drosophila
simulans wHa]"
gene 24489..24764
/locus_tag="wEsol_01212"
CDS 24489..24764
/locus_tag="wEsol_01212"
/codon_start=1
/transl_table=11
/fullproduct="qcoverage 100 , hcoverage 100 , similarity
100 , identity 100 , evalue 2.28e-55 , alnlength 91 ,
Bacteria , Proteobacteria , WP_006280002.1 MULTISPECIES:
hypothetical protein [Wolbachia]"
/cog="COG4095 COG4095 89 Uncharacterized conserved
protein"
/pfam="PQ-loop MtN3_slv"
/product="hypothetical protein"
/translation="MYINIEECFGFIALIASLIGLSPQVYKAYITKVTRDVSMLMLVN
YLICSLSWIGYGLYQSSIFVVL SNIAGLVISIISIIQKCYDAP"
/besthit="qcoverage 100 , hcoverage 100 , similarity 100
, identity 100 , evalue 2.28e-55 , alnlength 91 ,
Bacteria , Proteobacteria , WP_006280002.1 MULTISPECIES:
hypothetical protein [Wolbachia]"
gene 24745..25245
/locus_tag="wEsol_01213"
CDS 24745..25245
/locus_tag="wEsol_01213"
/codon_start=1
/transl_table=11
/product="hypothetical protein"
/pfam="TPK_catalytic MAF_flag10 Pfam-B_8461"
/tigr="TIGR01378 thi_PPkinase 206 thiamine
pyrophosphokinase"
/translation="MQNLHHDHVLHCSTQQQYRSIVVLNGKIPSSSFFKRDIPIIAVD

```

```

GGANKLLSIGVKPDLVVGDLDSVNLDLRANLNTIYLPDQDYCDFSKAMAHKTVKLLP
SIVTGITGGAIDHILQNINIFLSTGSIFYTPSPPMVGYTLQKGITHFFSLPKNTKISL
LGIPRA"
/cog="THI80 COG1564 212 Thiamine pyrophosphokinase"
/besthit="qcoverage 100 , hcoverage 72.1739130434783 ,
similarity 100 , identity 100 , evalue 2.31e-114 ,
alnlength 166 , Bacteria , Proteobacteria ,
WP_070356831.1 thiamine diphosphokinase [Wolbachia
endosymbiont of Drosophila incompta]"
gene 25848..26177
/locus_tag="wEsol_01214"
CDS 25848..26177
/locus_tag="wEsol_01214"
/codon_start=1
/transl_table=11
/pfam="DDE_Tnp_1_5"
/fullproduct="qcoverage 100 , hcoverage 100 , similarity
100 , identity 100 , evalue 4.31e-75 , alnlength 109 ,
Bacteria , Proteobacteria , WP_141456678.1 MULTISPECIES:
transposase [unclassified Wolbachia]"
/translation="MPQKMRVSNCHYEYNKFLQERGSIFCYINDAIENWYENCPKMQGG
NYIYSDKVVILVHIIVSFFRIGLRQTVGFIKGYLQQIGRDLAVISYSQASRRFKKLN
KINDCRK"
/product="transposase"
/besthit="qcoverage 100 , hcoverage 100 , similarity 100
, identity 100 , evalue 4.31e-75 , alnlength 109 ,
Bacteria , Proteobacteria , WP_141456678.1 MULTISPECIES:
transposase [unclassified Wolbachia]"
gene 26161..26796
/locus_tag="wEsol_01215"
CDS 26161..26796
/locus_tag="wEsol_01215"
/codon_start=1
/transl_table=11
/pfam="DDE_Tnp_1 rve DDE_Tnp_1_2"
/fullproduct="qcoverage 100 , hcoverage 100 , similarity
100 , identity 100 , evalue 2.85e-152 , alnlength 211 ,
Bacteria , Proteobacteria , WP_081600764.1 MULTISPECIES:
transposase [unclassified Wolbachia]"
/translation="MIAENNMEDIEIAIDSTGISIYNNTPGHSKENSTDRKYRGYEQT
RKLHVMLNINNKKAIAVKYSNGVYSDHYGACDLLKEVDFQHAIKALYADRACDRHKFY
KLCNEYDIKTKIPPINNAAEHPEIDYMSDRNAAIRLIKLYGEDGMKEWKKEVNYGKRS
YIEGFFSRLKQIFGFSFRNKSEINREKELLIKCYLLNKFTDIGMAKFEIVT"
/product="transposase"
/besthit="qcoverage 100 , hcoverage 100 , similarity 100
, identity 100 , evalue 2.85e-152 , alnlength 211 ,
Bacteria , Proteobacteria , WP_081600764.1 MULTISPECIES:
transposase [unclassified Wolbachia]"
gene 27798..29201
/locus_tag="wEsol_01216"
CDS 27798..29201
/locus_tag="wEsol_01216"
/codon_start=1
/transl_table=11
/pfam="MCD"
/fullproduct="qcoverage 100 , hcoverage 100 , similarity
100 , identity 100 , evalue 0.0 , alnlength 467 ,
Bacteria , Proteobacteria , WP_015588958.1 MULTISPECIES:
malonyl-CoA decarboxylase [unclassified Wolbachia]"
/translation="MTKESLVKTDIVKVEDKKAVRSFFKILGGVADAVRSWIGNISPD

```

```

LSNSRDIDSLVLKMNECLNPKGGEVSARKNAVSLGNLYLSLSEKGKIKFLQTLAEKFN
PNKAEIDEKIREYKKNQDPELNYKFEQDLIKILESPRSKILKQFISLPEGLKFIVDMR
SDVLKLKNQYRSLNPLESELKNILYTWVDVDLLDLRQITWDSPASLLEKLIKYEAVHK
ISSWGDLDKNRLDSRCLCAFFHYKIPNEPLIFVEVALVDKIADSIQHLLDESVPSPNDP
SNASTAIFYSISNTQAGLSGISLGNFLIKRVVEKLSQEFKSIKTYATLSPIPGFTKWL
KNNLNQDVTLLGKLNKQSSAEILESAAEQKTNVECTNETKQYMLKLCAYYLLKVNS
NGNTYDPVAHFHLSNGASIKQLNWMADTSEKGISQSAGMMVNYLYELPKIDNNHENYM
VNKVISCSKKVSSMLKE"
/product="malonyl-CoA
decarboxylase"
/besthit="qcoverage 100 , hcoverage 100 , similarity 100
, identity 100 , eval 0.0 , alnlength 467 , Bacteria ,
Proteobacteria , WP_015588958.1 MULTISPECIES: malonyl-CoA
decarboxylase [unclassified Wolbachia]"
gene 29281..31077
/locus_tag="wEsol_01217"
CDS 29281..31077
/locus_tag="wEsol_01217"
/codon_start=1
/transl_table=11
/fullproduct="qcoverage 100 , hcoverage 100 , similarity
99.8 , identity 99.8 , eval 0.0 , alnlength 598 ,
Bacteria , Proteobacteria , WP_015588959.1 MULTISPECIES:
translation elongation factor 4 [unclassified Wolbachia]"
/cog="LepA COG0481 603 Membrane GTPase LepA"
/pfam="GTP_EFTU MMR_HSR1 Miro SRPRB Ras GTP_EFTU_D2 EFG_C
LepA_C"
/tigr="TIGR01393 lepA 595 GTP-binding protein LepA"
/product="translation
elongation factor 4"
/translation="MNNIRNFAIIAHIDHGKSTLADRLIEECNGLEAREMTNQILD SM
DIERERGITIKAQTVKLNYTANDGNQYCLNLM DTPGHVDFS YEVSRS LAACEG SLLV
DSSQGV EAQTLANVYKAIDNNHEIIVVLNKNVDLPAADPEKVKLQVEEVIGIDASESVL
ISAKTGLGIKDVLEAIVAKLPAPQGDVNAPLQAILVDSWYD TYLGVVILVRVKNGLVK
KGMKIVMSNNATYQIDNIGIFT PKKVM TGELSAGEVGFITASMKEVADCKVGD TITE
EKRPCSKALPGFKEVHPVVFCSIFPHKTDDFKYLREALEKLHLNDASFTFEAETSNA L
GYGFR CGFLGMLHLEVIQERLEREFDDLDTATAPSVIYRVTTTRS GEVLNIHNPSDMPD
PTKIEIVEEPWITATIMVPDQYLGEILSLCEERRGEQEDLSYIGNTTTALLRYKLPLS
EVVFD FYDRLKSISKGYASLDWEISSYLVSQIDKLSFLINGEPVDALACIVHKSRAEK
RGREICARLKD LIPRQQYKIAIQAAVGGKIIARETINPYRKDVTTKLYGGDVTRMKL
LEKQKKGKKRLHSIGNVNIPQNAFIQALKISD"
/besthit="qcoverage 100 , hcoverage 100 , similarity 99.8
, identity 99.8 , eval 0.0 , alnlength 598 , Bacteria ,
Proteobacteria , WP_015588959.1 MULTISPECIES: translation
elongation factor 4 [unclassified Wolbachia]"
gene complement(31762..31935)
/locus_tag="wEsol_01218"
CDS complement(31762..31935)
/locus_tag="wEsol_01218"
/codon_start=1
/transl_table=11
/fullproduct="qcoverage 100 , hcoverage 100 , similarity
98.2 , identity 98.2 , eval 3.35e-24 , alnlength 57 ,
Bacteria , Proteobacteria , WP_218937023.1 hypothetical
protein [Wolbachia endosymbiont of Carposina sasakii]"
/translation="MIVLYKLHLLFSEEIEILLNLSVLFPLNNIKMLIHIIAQ SITA
AIFIIAAAISAAK"
/product="hypothetical protein"
/besthit="qcoverage 100 , hcoverage 100 , similarity 98.2
, identity 98.2 , eval 3.35e-24 , alnlength 57 ,

```

gene Bacteria , Proteobacteria , WP\_218937023.1 hypothetical protein [Wolbachia endosymbiont of Carposina sasakii]"  
complement(31919..32026)  
/locus\_tag="wEsol\_01219"

CDS complement(31919..32026)  
/locus\_tag="wEsol\_01219"  
/codon\_start=1  
/transl\_table=11  
/product="hypothetical protein"  
/translation="MEIAPTIPPTIPTTRGDGVVRLNIISGRDIIDSII"  
/besthit="qcoverage 100 , hcoverage 60.3448275862069 , similarity 100 , identity 100 , evalue 3.17e-14 , alnlength 35 , Bacteria , Proteobacteria , WP\_174930852.1 MULTISPECIES: hypothetical protein [Wolbachia]"

gene 32052..32456  
/locus\_tag="wEsol\_01220"

CDS 32052..32456  
/locus\_tag="wEsol\_01220"  
/codon\_start=1  
/transl\_table=11  
/pfam="Pfam-B\_11076"  
/fullproduct="qcoverage 100 , hcoverage 100 , similarity 100 , identity 100 , evalue 4.40e-80 , alnlength 134 , Bacteria , Proteobacteria , WP\_209452301.1 hypothetical protein [Wolbachia endosymbiont of Ceratosolen solmsi]"  
/translation="MLSITSKGLSQQPENYQHLFLTSLLLFIGNIIAGAFIAVSGVFPICKVDSLSSLSAALESIPAVGIHALALTIAAIGVVIVIDLAKQAKEYISGKIMQAEKESVTDTHKEPDSKVDEAKEGNVKNERKVP LLP"  
/product="hypothetical protein"  
/besthit="qcoverage 100 , hcoverage 100 , similarity 100 , identity 100 , evalue 4.40e-80 , alnlength 134 , Bacteria , Proteobacteria , WP\_209452301.1 hypothetical protein [Wolbachia endosymbiont of Ceratosolen solmsi]"

gene 33183..33563  
/locus\_tag="wEsol\_01221"

CDS 33183..33563  
/locus\_tag="wEsol\_01221"  
/codon\_start=1  
/transl\_table=11  
/pfam="TrbC"  
/fullproduct="qcoverage 100 , hcoverage 100 , similarity 100 , identity 100 , evalue 1.52e-83 , alnlength 126 , Bacteria , Proteobacteria , WP\_015588961.1 MULTISPECIES: TrbC/VirB2 family protein [unclassified Wolbachia]"  
/translation="MNPTIKRIFNIFLIVLFISFSHVGSAAADTNTDTTAQVICNIIGYVWGIGGPLMTVVIIGAALLAIFGRMPWPALFALGIFCAVFFGAKTIVIKVMGGIGGTGNTSLMDQCGTGDTKKNYFFLKQT"  
/product="TrbC/VirB2 family protein"  
/besthit="qcoverage 100 , hcoverage 100 , similarity 100 , identity 100 , evalue 1.52e-83 , alnlength 126 , Bacteria , Proteobacteria , WP\_015588961.1 MULTISPECIES: TrbC/VirB2 family protein [unclassified Wolbachia]"

gene complement(33539..34537)  
/locus\_tag="wEsol\_01222"

CDS complement(33539..34537)  
/locus\_tag="wEsol\_01222"  
/codon\_start=1  
/transl\_table=11  
/fullproduct="qcoverage 100 , hcoverage 100 , similarity

100 , identity 100 , evalue 8.46e-235 , alnlength 332 ,  
 Bacteria , Proteobacteria , WP\_015588962.1 MULTISPECIES:  
 pyruvate dehydrogenase complex E1 component subunit beta  
 [unclassified Wolbachia]"  
 /cog="AcoB COG0022 324 Pyruvate/2-oxoglutarate  
 dehydrogenase complex, dehydrogenase (E1) component,  
 eukaryotic type, beta subunit"  
 /pfam="Transket\_pyr Transketolase\_C"  
 /tigr="TIGR00204 dxs 616 1-deoxy-D-xylulose-5-phosphate  
 synthase"  
 /product="pyruvate  
 dehydrogenase complex E1 component subunit beta"  
 /translation="MATLSVREALCTAIREEMQNDSDVLIMGEEVAEYDGAYKVTKGL  
 LKEFGENRVVDTPITEHGFAGLAVGAAAFAGLKPIVEFMTFNFSMQAIDQIVNSAAKTN  
 YMSGGQLGCPIVFRGPNGAAARVAAQHSQCFAAWYSHIPGLKVIAPYFASDCRGLLKA  
 AIRDPNPVIFLENEIAYGHEHEVSDSELSNKDYLLLEIGKAAVIREGKDVITITAFSLKL  
 MDALNAADLLSSEGIEAEVIDLRTLRLPLDTQTVINSIQKTNRLLSVVEEGWPFAGIGAE  
 LSAVIMEQGFYDLAPVVRVTGKDIPLPYAANLEKKALPQVEDIVEAVHQVCFRKK"  
 /besthit="qcoverage 100 , hcoverage 100 , similarity 100  
 , identity 100 , evalue 8.46e-235 , alnlength 332 ,  
 Bacteria , Proteobacteria , WP\_015588962.1 MULTISPECIES:  
 pyruvate dehydrogenase complex E1 component subunit beta  
 [unclassified Wolbachia]"

gene complement(35085..36185)  
 /locus\_tag="wEsol\_01223"

CDS complement(35085..36185)  
 /locus\_tag="wEsol\_01223"  
 /codon\_start=1  
 /transl\_table=11  
 /fullproduct="qcoverage 100 , hcoverage 100 , similarity  
 100 , identity 100 , evalue 3.03e-252 , alnlength 366 ,  
 Bacteria , Proteobacteria , WP\_015588963.1 MULTISPECIES:  
 AAA family ATPase [unclassified Wolbachia]"  
 /pfam="IstB\_IS21 Pfam-B\_736 RuvB\_N AAA\_22 AAA\_14 AAA  
 AAA\_5 AAA\_17 AAA\_2 Pfam-B\_15939"  
 /tigr="TIGR01241 FtsH\_fam\_496 ATP-dependent  
 metallopeptidase HflB"  
 /product="AAA family ATPase"  
 /translation="MKKIEISELLKRISICLLCVATIVSIAFLFAYMHTMLLSKGYEL  
 AAHYVSEAMPVCVLLVVPFLFIVWFVYDQVFSKLKEVELPISIELANSDDKRITFADAI  
 DDSLKQRLQMICCDQMTTEMRKLFNGKSINSLRGYILYGPPGNGKTLIARAIAGESNM  
 NFISISGPELIGVYIGHGAHAVRELFKIAKKYSPCIVFIDEIDAVAQKRSTANN SAYH  
 CRESLTQLLTEIDGFKSRKDIIVIGATNLIGGIDPALIRPGR LGQKVYPNPNIIEVRQ  
 KILALYMRGKTDEKLSLQDIADKTEGYSGAELEQLVNEAKISAGAQRRLIVSEEDFS  
 YALHRLSPEQERDRIKLVSNAKTQIEETS FIR"  
 /besthit="qcoverage 100 , hcoverage 100 , similarity 100  
 , identity 100 , evalue 3.03e-252 , alnlength 366 ,  
 Bacteria , Proteobacteria , WP\_015588963.1 MULTISPECIES:  
 AAA family ATPase [unclassified Wolbachia]"

gene 37348..38553  
 /locus\_tag="wEsol\_01224"

CDS 37348..38553  
 /locus\_tag="wEsol\_01224"  
 /codon\_start=1  
 /transl\_table=11  
 /fullproduct="qcoverage 100 , hcoverage 94.5754716981132  
 , similarity 99.8 , identity 99.8 , evalue 1.51e-273 ,  
 alnlength 401 , Bacteria , Proteobacteria ,  
 WP\_174516758.1 MFS transporter [Wolbachia endosymbiont of  
 Cardiocondyla obscurior]"

```

/pfam="MFS_1 Sugar_tr MFS_2 MFS_2 Sugar_tr"
/tigr="TIGR00883 2A0106 400 MFS transporter,
metabolite:H+ symporter (MHS) family protein"
/product="MFS transporter"
/translation="MLFIDLINIISREFCFAKDVYSNQLQFGIVGLGAIVRPLGAFI
FGHVGDYGRSIALIITILLISIPSSLIAPSHNQVGIISTILLAIHITQGIALGG
EQGSSVYLIEHLSSRKENLGMFYFGMMGFRSIGVLLSAVIVIICKKTTDFCTLGWRLP
FIFSAILGLISAYSIIYTLGETPAYEKNRKQRNLPDLPIELIKRHKRALILAILISVP
VNVAVGFTIFLRTLAKELIASVDVYVTTYINEIVLIITSVLMPISIAFGMLADKVGKE
RTAILFIAITMALCCPALSIAYYYKNYLVIALSVMLVLSIIERGIVPIGIVASELFTN
VRFSGVSLSRNISYALHGGFTPMVCIWLTVTFTPTNLAAGLYIVFCLLISVAILQIK
PQDKKFDWS"
/besthit="qcoverage 100 , hcoverage 94.5754716981132 ,
similarity 99.8 , identity 99.8 , evalue 1.51e-273 ,
alnlength 401 , Bacteria , Proteobacteria ,
WP_174516758.1 MFS transporter [Wolbachia endosymbiont of
Cardiocondyla obscurior]"
gene complement(39024..39434)
/locus_tag="wEsol_01225"
CDS complement(39024..39434)
/locus_tag="wEsol_01225"
/codon_start=1
/transl_table=11
/fullproduct="qcoverage 100 , hcoverage 100 , similarity
100 , identity 100 , evalue 1.93e-93 , alnlength 136 ,
Bacteria , Proteobacteria , WP_015588966.1 MULTISPECIES:
nucleoside deaminase [Wolbachia]"
/cog="CumB COG0590 152 Cytosine/adenosine deaminases"
/pfam="dCMP_cyt_deam_1 MafB19-deam"
/tigr="TIGR00326 eubact_ribD 343 riboflavin biosynthesis
protein RibD"
/product="nucleoside
deaminase"
/translation="MELAIEQAKLAQKNDEVPIGAVIVSGDNIISSAHNISSDPTAHA
EMLAIRQAFSTPTLCDADMYVTLEPCPMCAQAISFARIKRLYFGAYNPKGGGIENGAK
IFQFCSHIPEVYGGILETECSFLLKDFFFEKLRLNI"
/besthit="qcoverage 100 , hcoverage 100 , similarity 100
, identity 100 , evalue 1.93e-93 , alnlength 136 ,
Bacteria , Proteobacteria , WP_015588966.1 MULTISPECIES:
nucleoside deaminase [Wolbachia]"
gene complement(39460..41064)
/locus_tag="wEsol_01226"
CDS complement(39460..41064)
/locus_tag="wEsol_01226"
/codon_start=1
/transl_table=11
/fullproduct="qcoverage 100 , hcoverage 100 , similarity
100 , identity 99.8 , evalue 0.0 , alnlength 534 ,
Bacteria , Proteobacteria , WP_015588967.1 MULTISPECIES:
CTP synthase [Wolbachia]"
/cog="PyrG COG0504 533 CTP synthase (UTP-ammonia lyase)"
/pfam="CTP_synth_N GATase Peptidase_C26"
/tigr="TIGR00337 PyrG 526 CTP synthase"
/product="CTP synthase"
/translation="MKEAKFIFVTGGVVSSLGKGLVASSVGALLQAHGFKIRIRKLDLP
YLNIDPGTMNPTQHGEVFTVEDGAETDLDLGHYERFTGIKATKDDNITTGKIYHELLK
KERRGDYLGKTVQVIPHVTDLIKSFIFNGTEGLDFVICEIGGTVDIESQPFLEAIRQ
VNYTLGKQRVILHLTLIPYLTAQELKTKPTQHSVRELNSAGLQPDIIICRSEKEIF
DNQREKIAKLCNVSLSNVIPAPDVSHIYELPVLYSQCLDTQILEHFHLSKPKPSLTE
WDQIVHSIRHPTQEVTVSIVGKYTEFPDAYKSLVEALNHGAISNKVKVKINWVNSREK

```

```

EKEPINEKLIGEKLQNSHAILVPGGFGDDGVEGKILAINYARTNNIPFFGICLGMQLA
IIEFARNVVKLEDSEEFNRNCKHPIVKLAGDQDDDLGGTMRLGAYKCNINANSKMMD
AYSNTTISERHRHRYIINSYKDDLEKNGLLCSGISEDGTCIEAVELESHPWFIGVQF
HPEFQSKPFSPLFVSFVKAIDKK"
/besthit="qcoverage 100 , hcoverage 100 , similarity 100
, identity 99.8 , evalue 0.0 , alnlength 534 , Bacteria ,
Proteobacteria , WP_015588967.1 MULTISPECIES: CTP
synthase [Wolbachia]"
gene complement(41064..41384)
/locus_tag="wEsol_01227"
CDS complement(41064..41384)
/locus_tag="wEsol_01227"
/codon_start=1
/transl_table=11
/fullproduct="qcoverage 100 , hcoverage 100 , similarity
100 , identity 100 , evalue 5.54e-54 , alnlength 106 ,
Bacteria , Proteobacteria , WP_007548880.1 MULTISPECIES:
preprotein translocase subunit SecG [Wolbachia]"
/cog="SecG COG1314 86 Preprotein translocase subunit
SecG"
/pfam="SecG"
/product="preprotein
translocase subunit SecG"
/translation="MSVAVLSIFQIILVVVLVILVLLQPPGSSSLSGFSNTQQGVNSM
IPVKSSSENPLSRITAIVAGLFIINTLLLSGLCSKDVHKKSIAEKIILEKKQESESTSV
PFEN"
/besthit="qcoverage 100 , hcoverage 100 , similarity 100
, identity 100 , evalue 5.54e-54 , alnlength 106 ,
Bacteria , Proteobacteria , WP_007548880.1 MULTISPECIES:
preprotein translocase subunit SecG [Wolbachia]"
gene 41529..42044
/locus_tag="wEsol_01228"
CDS 41529..42044
/locus_tag="wEsol_01228"
/codon_start=1
/transl_table=11
/fullproduct="qcoverage 100 , hcoverage 100 , similarity
100 , identity 100 , evalue 9.96e-122 , alnlength 171 ,
Bacteria , Proteobacteria , WP_141457186.1 MULTISPECIES:
gamma carbonic anhydrase family protein [unclassified
Wolbachia]"
/cog="PaaY COG0663 176 Carbonic
anhydrases/acetyltransferases, isoleucine patch
superfamily"
/pfam="Hexapep Pfam-B_7219 Pfam-B_411 Hexapep Hexapep
Hexapep"
/tigr="TIGR02287 PaaY 192 phenylacetic acid degradation
protein PaaY"
/product="gamma carbonic
anhydrase family protein"
/translation="MYHILKYKNYEPKIDESAFIAGGSHIIGKVEIGRDASIWFNCVI
RGDVGSIKIGNGTNIQDGTVIHVDRNPPGGDTIIGSMVTVGHFVCLHACTVHDKAFI
GSTVMDHAVVEPEAMVAAGSLVTHGKVIKSGEIWAGRPAAKFFKKMSNEEIKHITQSAQ
NYIMLMNEYKN"
/besthit="qcoverage 100 , hcoverage 100 , similarity 100
, identity 100 , evalue 9.96e-122 , alnlength 171 ,
Bacteria , Proteobacteria , WP_141457186.1 MULTISPECIES:
gamma carbonic anhydrase family protein [unclassified
Wolbachia]"
gene complement(42095..42925)

```

CDS

```
/locus_tag="wEsol_01229"
complement(42095..42925)
/locus_tag="wEsol_01229"
/codon_start=1
/transl_table=11
/pfam="Pfam-B_1392 Pfam-B_13674 Pfam-B_12398 Pfam-B_794
Pfam-B_4307 Pfam-B_4497"
/fullproduct="qcoverage 100 , hcoverage 82.1428571428571
, similarity 100 , identity 99.6 , evalue 3.81e-90 ,
alnlength 276 , Bacteria , Proteobacteria ,
WP_174516759.1 hypothetical protein [Wolbachia
endosymbiont of Cardiocondyla obscurior]"
/translation="MSEGINDTMQVADDNEVTSGNKGNSRVSSDSTTLSEGSVNGQE
GVTSKSKGKGRSTSKRIQRSKQQLKEKDEEITALKAQQNTQEVADLQQQLQAKDEEI
IALKAQQNTQEVADLQQQLQAKDEEITALKAQQNTQEVADLQQQLADKEKEIAQLKQQ
QPNAEVDKLDKADLTAKKEVDKLDKKNKELEAENKKIQQLKQNGARYTATVGMGLAA
GLIAFTALERTVKLEMLVMIGIAVASALVAGGITYAVLPSTQVDGAKAQEVNENGGKK
"
/product="hypothetical protein"
/besthit="qcoverage 100 , hcoverage 82.1428571428571 ,
similarity 100 , identity 99.6 , evalue 3.81e-90 ,
alnlength 276 , Bacteria , Proteobacteria ,
WP_174516759.1 hypothetical protein [Wolbachia
endosymbiont of Cardiocondyla obscurior]"
```

gene

```
43365..45833
/locus_tag="wEsol_01230"
```

CDS

```
43365..45833
/locus_tag="wEsol_01230"
/codon_start=1
/transl_table=11
/fullproduct="qcoverage 100 , hcoverage 100 , similarity
100 , identity 99.9 , evalue 0.0 , alnlength 822 ,
Bacteria , Proteobacteria , WP_174516760.1 MULTISPECIES:
valine--tRNA ligase [unclassified Wolbachia]"
/cog="ValS COG0525 877 Valyl-tRNA synthetase"
/pfam="tRNA-synt_1d tRNA-synt_1 tRNA-synt_1g tRNA-synt_1e
tRNA-synt_1_2 tRNA-synt_1g tRNA-synt_1f tRNA-synt_1e
Anticodon_1"
/tigr="TIGR00422 valS 863 valine--tRNA ligase"
/product="valine--tRNA
ligase"
/translation="MLKEKYGFKEVEDKCNILWEGSKVYKWNGEKDNTFTIDTPPPTI
SGKLHIGHIFSYCHTDFIARFQRM LGKDVFYPIGFDDNGLPTERLVEQTYKTRAKEVG
REKFIEMCHEVIEKSKQEFKELFKSVGISYDWDLEYHTISKETVTL SQMSFIDL NKG
YAYRKMQPILWDPVDKTAIAQAEIEDKVFESSLNTIVFSTQENEQINIATTRPELLPA
CVAVFCHPEDARYTHLIGKTAVVPITETKVPPIIADDKVKIDKGTGLVMCCTFGDELDI
YWQQKHNLPMKIIIDQDGRMNLHDVIPPHPGVIPARDAGIYEINGLKIVAARKRMIEI
LTEKGLLVESTNISHSVKCAERSGAPLEILPTYQWFIKTLEQKAQVLDKVKECNWHPA
TMRKRMEVWIEGLNWDWCISRQRYFGVFPFAWYSNRKGEEKIILAEIKDLPIDPLKD
LPKGYSKEEVIPDQDVM DWTATSSITPQLSALAVNSEFSLPNHRYDTIFPADLRSQSH
EIIRTWAFYTILKAHYHANS LPWKNIMISGWCLADKKKMSKSGNIITPHVILETYG
ADVVR YWAANSRLGVDTVYSENIFKIGKRLVTKLWNASKFVSMFMEKHQTVSINSISE
TMDKWILSKLYKVIGKATNNLLQFEYCEALGAVEEFFWKDFCDNYLELVKKRAYGSSE
ATLSAQSLAYVLNIIILRLFAPFLPYITEEVYHQLYSYNSVHNQSNWPSKEELIYDKY
SEEMGDNVIQILNIIIRKIKADNNVSVKHLIKKLMIKASVQEDKLDQSAQDDLQAVCNA
EMIEWMQSELETEDGKYIVNIDLY"
/besthit="qcoverage 100 , hcoverage 100 , similarity 100
, identity 99.9 , evalue 0.0 , alnlength 822 , Bacteria ,
Proteobacteria , WP_174516760.1 MULTISPECIES:
valine--tRNA ligase [unclassified Wolbachia]"
```

gene 45897..>46040  
 /locus\_tag="wEsol\_01231"  
 CDS 45897..>46040  
 /locus\_tag="wEsol\_01231"  
 /codon\_start=1  
 /transl\_table=11  
 /product="hypothetical protein"  
 /translation="MRDLYSKTNAPYLIAGALATLVLLASGTLAVAPYVKFLSSVAAF  
 NVAL"  
 /besthit="qcoverage 100 , hcoverage 16.2162162162162 ,  
 similarity 100 , identity 100 , evalue 3.88e-18 ,  
 alnlength 48 , Bacteria , Proteobacteria , AGJ99787.1  
 hypothetical protein wHa\_03160 [Wolbachia endosymbiont of  
 Drosophila simulans wHa]"

# ORIGIN

```

1  tgaccttacc cagaaaaagt ggagagaaag tgtggaatgt tttttacaaa aagaatgatg
61  catcaaattg ttctggaatg caatagttaa tagtgacgtt gtttggtata aaaaatttct
121 atatattcaa atatagcagt tttgatatgc tgttttagagt gccgagaggt gtctattggg
181 aactcccttt ttagagaact gaagaagctt tctgcaacag aattgtcgta acaacagcct
241 ttattactca tctatattct ttacagctaa gagatattga tacccttgcg cagtatattg
301 tgaaccttga tcactatgta atagtagatt tttggcaggt ttacgcttgt taacggccat
361 taataaagag tccataacca attgtttatt tattgaactg ctcattaact accatgcgtg
421 aatatagatc gattattggt gccaaatata gccatccttc tttgggtttt atataagtaa
481 tcccatactt tatttggttg atcgacaata aagttttggt ctaatatatt gggagctact
541 gtccgtttgt tgtttcttaa ttttaaattt tcttctcaat atagcctgaa taccattttt
601 ctgcataata ctttgcaactg tttttaagtt gcaactttta cccaaagcct ttaattcagc
661 atgaatttta ggagctccat atctacattt agaagcttga tatatttttt gaatatctgc
721 taataactct ttatttgctg attctctact gcttattttt cttgtggtcc acttatagta
781 gccactagca gaaaatccta cataattcct gtactttata gcagttacta tataaaaaaa
841 tattttactc tttttgactg gccagggcct tttttaaaat gtctctttct cttgttactt
901 ttgcttttgta aatcaaacct ctctttgtcg taaggagcca tgttacctct acctggaaat
961 gcatctgctg ccgacttttt ttcgttgtgt ttctttatcc attttcctaa taaaccaccc
1021 tttattccta aatcctttgc tatttttgta attgtttgac ctgcctttct ttgttcattt
1081 gccagtttaa cagcttccaa tttgaattct gctgtatatt ctcttaccat ttctaactct
1141 ccaaaatttt attttaccgg aaaaaactcc tttctttctc tccacttttt ctgggtaagg
1201 tcagtatggg aaaaggtgaa agatgtacta aaaaaccag agatgataaa aaaggaatac
1261 caacgtagag tattagaaaa taaaaatgat gaatcatcag agaaaaagtt tgcaagaaga
1321 gaaaatcaaa taaaagaagg tatcgaaaaa ttaatggaag attattatag tcaagaaaat
1381 gcaggagaga aaggatatat aagcgaggaa gaatttaaac agacaatgag aaaaatgaaa
1441 gaacgcttac aagggataga agaagagaaa aaaaaggtag ttgatcagaa ggcagtagaa
1501 aaaggaataa gtcttattat aaatagcata aagaattttt attctagtgt aaaatcgaac
1561 ctggaacagc tagattggca aactaagcgc ggcattatta aagcattaat aggacaaatt
1621 aacattgggt gtgatcaggt agaagtagga tttcagatcg aagaaccagc acaggatggg
1681 ggaattctta atttgtatca ttgtactaca catcataata aggggggttg cgaagggtgt
1741 caagcaagtt ttttcgtttc tataaatctg gatttcagcg ttatgcgctg gaatgacaac
1801 gtgaggtaaa tttttcaaca tcccaaaatt acagaattca gtctgtttta ttaagtgtga
1861 actgttacac gaaaattttg taaacagatt aatataccct gtttttgcta ttcactctaa
1921 aatggaacca tagagtacgt tgaggagcgt aagcaaattt taatgcaaaa attactatca
1981 aaaaatagat tatgcaagag gtctaattat tctgccgcaa ttttgcctca tcacacttgc
2041 cacatttaat attccagctt catcataata atttccaatc acttgcaagg caagtggtaa
2101 acctcattg gagagcccaa caggaacaga aatagcaggc aatcctgcc gacttgccgg
2161 cacagtaaac acatcattga tgcacataat tagcggatct ggcttttcat ttaagccaaa
2221 agcttctggt ggagcagatg gcacaagtat gtaatctatt ttttcaaacg cttttataaa
2281 atcattttctg attaatgccc taatgcactg cgctttttcg taatattcat tatgatgacc
2341 tgaagaaagc gcataagcgc caattaaaaa tcttcttttc acctctttac cgaaaccttc
2401 tgctcttggt agtgaataca tttcttcaag ggtatcagca tcaaccctga acccataacg
2461 cacaccgtca taacgagcaa gattggatga agtttcagca gaacaaatta aataatagac
2521 tggatttgca tatttagtat gtggcagagt aacgtcaaca acttcagcgc cattttcttt
2581 taaataggaa gcaactttct cccaattatg gactatttcc tctgaaattc catccatcct
2641 atattctttt ggtataccaa tacgcttacc cttaacatca ccatttataa agctggaaaa

```

|      |             |              |             |             |             |             |
|------|-------------|--------------|-------------|-------------|-------------|-------------|
| 2701 | tttaggtgct  | ggctttctac   | ttgatattga  | atcttttgta  | tcatagccac  | agattgcttc  |
| 2761 | cagcattaat  | gctgaatcag   | agacagaacg  | agtaatgact  | cctgcttgat  | ctagagaact  |
| 2821 | cgcaaataca  | atcataccaa   | aacgcgagca  | tcttccataa  | gttggtttta  | ttccaactac  |
| 2881 | tccacagtaa  | gctgctggtt   | ggcgtacaga  | tccaccggtg  | tcactcccta  | gtgctccagc  |
| 2941 | gcataaaaaa  | ccagccaccg   | atgctgcaga  | tccaccagat  | gatccaccag  | gaacaacttt  |
| 3001 | ttccccatca  | ctttttctaa   | tccacacatt  | ttcgacaggg  | ccaaaatagc  | tgttttgtgtt |
| 3061 | cgcagaaccc  | atagcaaatt   | catccatatt  | aagcttaccg  | agcatggctg  | ctccactttt  |
| 3121 | taaaagcaag  | tcagacaccg   | tagattcgta  | agtcggaacg  | aaattttcca  | gcattttttga |
| 3181 | gcatgctggt  | gtttttattc   | cttttgta    | gaatagatct  | ttgatgccaa  | ctggtacacc  |
| 3241 | catgagcggc  | gagattaaat   | catccttttg  | cctagagaaa  | tattcatctg  | cagcttttagc |
| 3301 | agctttcatt  | gctatctctg   | gggtttttgt  | tataaatgca  | tttaattttct | cattttcaac  |
| 3361 | cgcactgatg  | tgcgcctcta   | cgagttcaac  | ggcagaaaaa  | ctctttttttt | tgagcccgtc  |
| 3421 | atgcattttgt | gtaatactta   | actttcttag  | ttcattcatc  | aatattttaat | ttttagcaag  |
| 3481 | acgttaatta  | taacatggca   | cgataaaaaa  | tccatacatt  | tatagttaca  | gctagaaatg  |
| 3541 | tagctaaggt  | aacttagatt   | caccgacaat  | cgtcatcccg  | ctacttggtta | gcggttaaga  |
| 3601 | gataccgcag  | cggatatgacg  | tagaagctat  | actttttatac | tcaccaactc  | agtatccaat  |
| 3661 | ccggatttgta | tcttaaaaag   | gtcaaaaagac | tataataagc  | aaaggagtga  | tactgtgtct  |
| 3721 | gagtgaataa  | cgttgagatc   | ccagtgtctg  | ctgcttgcat  | agcattttatt | tacaaaaaaa  |
| 3781 | tagtcatgca  | agagactttg   | cttgatattt  | tgatataaatt | taggtctattt | aaagcaaaaa  |
| 3841 | atactaacad  | gaatgaagtg   | ataacatttg  | gttgtcgtct  | aaattttttac | gagagcgagt  |
| 3901 | taatcaaaga  | agcattaaaa   | aaagcaaaga  | gagaaaaatgt | tggtgtgggtg | catagctgtg  |
| 3961 | cagtgaacaa  | cgaagcagaa   | cgtcaggtaa  | agcaaaaagat | acgtaagattt | tacaaaaaatg |
| 4021 | atccaaataa  | agaaattatc   | gtagttgggtt | gtgctgttca  | gttggtatcca | gaagtttaca  |
| 4081 | gtagcattcc  | tggtgtaagt   | aaagtgtctg  | gtaatcaaga  | taagctaaaa  | gctgaaaattt |
| 4141 | acttactaaa  | tgacgataaa   | atcttggtca  | gtgataacca  | agtagaacctt | gttctaatta  |
| 4201 | atggattttga | agataagtca   | agggcatttt  | ttgaaattca  | aaatgggttgt | aatcatagctt |
| 4261 | gcacatttttg | ttcaattact   | gaggcaagag  | ggaataatcgt | atctgtgccca | ataaacagta  |
| 4321 | ttatagagca  | aatcaggatc   | ttttagtaaaa | atggatatca  | agaagtagtg  | tttacagggg  |
| 4381 | ttgatattac  | tgacttttgt   | acagattttgt | tggtgtaagcc | atcacttggtt | tcaatgatta  |
| 4441 | ggagagtttt  | aaaggatata   | ccagagttga  | agaggctaag  | actttcctctt | atcgatgttg  |
| 4501 | ctgaagttga  | cgacgaatta   | atggattttaa | tagctaataga | gtcaagacttt | atgcctcattt |
| 4561 | tacattttgag | tctacaatctt  | ggtaataaatt | taataactaaa | gagaatgaag  | cgtcgtcaca  |
| 4621 | acagagagca  | agtgatagaa   | ttttatcata  | aaatgaagag  | cttgagacctt | aatatagcat  |
| 4681 | ttggcgctga  | tattattgctt  | ggattttccaa | cagaaaactga | tgaaatgtttt | caggatacgg  |
| 4741 | ttgatctact  | aaaaaaaaata  | aatgtagtttt | acctacatgct | ttttccatat  | tcagagcgga  |
| 4801 | aaaatacacc  | tgctgcacgg   | atgccgcaaaa | taccagaaaaa | tgtacgtaaa  | gaacgggttaa |
| 4861 | agcacctaag  | agaggtgaatt  | aaggaaatga  | tgagcagtttt | ttatcaatctt | ttgctcagca  |
| 4921 | ccgagcaaa   | cgttctggtt   | gagcaaaaatc | atatcggttag | aacagaaaaat | tttgcattag  |
| 4981 | taaagcttga  | acaaaaagctt  | caagccaaga  | gtattgtgaa  | agttaatgttt | aaaggagtgg  |
| 5041 | aaaataatta  | tctaatacgga  | agtatctttac | cttaatttttt | tgtacatttaa | agaaatatatt |
| 5101 | gatatagtag  | ttatactata   | aatgataaatt | atgggttcat  | ttgtgataaac | taaaatatctt |
| 5161 | attgcttttat | tttttaattttt | cattccatgtt | gtctatttttt | ttattacttta | tattagtaatt |
| 5221 | agtacacaca  | ttgagcaagt   | acaaccctta  | aaattagaaa  | cagacaatga  | tgaaagtgtgt |
| 5281 | atacgttctg  | aggaggtttac  | tgcaaaaagaa | ataccaataa  | aatatcaaga  | acttgaaagt  |
| 5341 | agtcacacct  | ctgtttttcca  | agtagctgat  | cagaaaaaata | tgtgggtcacg | tattgcagat  |
| 5401 | caagctgagc  | ctacaaaaga   | aaaatcaaaa  | aaacttgattt | tttatgtttag | cgctaacgggt |
| 5461 | ggtaaggtat  | accatgataa   | ttcagaaaata | tttgtaaagg  | gtataaaaggc | aatagggggag |
| 5521 | agagtcctaa  | cttttagttga  | aagtcatttat | ggtttttataa | taaaaaatat  | agtggtcagat |
| 5581 | gaaattaaaa  | gtatacagca   | atttgatgggt | aaaattgattt | tccagtgggtt | tagcagcatgt |
| 5641 | tcttttaggtt | actatgctgg   | agaaaatgggt | aaaattgattt | ttgaagccgc  | gtatttctata |
| 5701 | gccaatattg  | aagatagtaa   | ttctcctccg  | gtattttgata | aatcagcaag  | tataatttgcg |
| 5761 | tttttgtttaa | acttctatta   | taatcccagc  | gttcaggata  | cacaattttgc | tccgtacatc  |
| 5821 | ggtcttggtta | taggaccaaac  | agttttttaga | ttaaaaagga  | ttaatgggtc  | accccaaaat  |
| 5881 | tcaatgccac  | tgaatgttcc   | ttgggtttgct | tatcaaaata  | aacttggtgtt | tgattatttca |
| 5941 | ataatcccag  | aaatcaaaaac  | ctttctcggc  | tatcgttactt | ttagcgttcc  | gatacctgttt |
| 6001 | gcagatgaca  | tatctactca   | caatattgaa  | gttggttttga | tattttaattt | ttagtataaa  |
| 6061 | tttaatatata | atataaaattc  | ttatctttttc | tatctaacaa  | accaaagtgtt | ggtacgatttg |
| 6121 | ttgctttttaa | aaaaatgaca   | gtttctactgt | ttctaataatt | attcgctagc  | cttttttgatt |
| 6181 | tctgatgcaa  | taagcttttgc  | ttatctttctc | tatgtttctat | aagcccgccg  | attaccataa  |
| 6241 | tttcaccgct  | cttaatttttt  | aacatagagt  | tcattttctct | gattttcaaca | attggaatgtt |

|      |             |             |             |             |             |             |
|------|-------------|-------------|-------------|-------------|-------------|-------------|
| 6301 | cgctatttta  | tttcatttta  | ctctgctgtg  | cgacgtactc  | tatatctgga  | tcttttagtgt |
| 6361 | agccgttaat  | tcttgataaa  | gttggaatga  | tatccatgaa  | tatttcacta  | gtatcaatgt  |
| 6421 | taatgcttgg  | gtggattatt  | agcacaacac  | ctattgggac  | gctattcatc  | ttggtaatta  |
| 6481 | aggtctgatt  | agagtttcta  | gtatcttttt  | gtatatcgga  | ggtaaaataa  | atatggtttt  |
| 6541 | tagtaaata   | aatcatcgct  | tgctgattat  | ttatagcatg  | tactctgggg  | cttgaaatta  |
| 6601 | cagttgaagt  | gccaaatttg  | tctaaatttt  | ttactaaatc  | tcctagatca  | tttgcaccaa  |
| 6661 | agttcattgc  | taggttaata  | atggagttat  | cttgattttat | tatagactta  | gttccatctt  |
| 6721 | gtaagtcatt  | taagttcata  | ccagaaaggt  | atgtgtcatc  | tagcacaact  | tcaactattt  |
| 6781 | ttgcctctat  | cattacttga  | gaagacgcta  | acttcttaac  | cttattaata  | tattcttcaa  |
| 6841 | cagctttgtg  | gatatctttt  | ctagcattca  | aaataataac  | accagcttct  | ctggtggatg  |
| 6901 | aaaggaattc  | gccatcatcc  | accccgttaa  | catccattat  | tgcattcaag  | cctttttcta  |
| 6961 | atgaattcca  | taagtcacta  | ctgtattgag  | acttcataac  | attgttatag  | tccctatcaa  |
| 7021 | cgttacttcc  | atcactgtta  | gtaatatgtt  | tattaatgac  | gaaactgctt  | tgagcagaat  |
| 7081 | gttgaatatt  | gatgaagtct  | acgtaataat  | tttgtgctga  | tggcaagtc   | tgctcaattc  |
| 7141 | taattacacc  | attacttggt  | gagtaacgca  | gtttggcgct  | atgtgtctata | ctctgaatta  |
| 7201 | cttcgtttat  | atccttatct  | tttagcttta  | aaataaatatt | acctgatatt  | tttgggtcca  |
| 7261 | tatccaagtt  | aacgtcagaa  | agttttccta  | tctcaatcag  | caaactcctt  | attgatactt  |
| 7321 | cttcactaac  | attaatagaa  | ataagctgat  | tactgattgt  | gagatcgagg  | aactctattg  |
| 7381 | gtaaaggcat  | aatttctggt  | attgcccgtt  | cattaatctc  | caaagagggt  | ttatattggt  |
| 7441 | gcaacggata  | atcgtgctta  | taattgtcta  | tgtaatatag  | atattgcttg  | gtaggtagat  |
| 7501 | gtgtgcaaga  | aataatgaag  | aggagtatta  | agcattttaa  | aatagccatt  | agaacagcat  |
| 7561 | atagatctat  | actaatagat  | ttctataaaa  | atattaaaaa  | tgtatttaaat | ttcgttttca  |
| 7621 | tcgagcagat  | aattgtcata  | tattagcttt  | ggctatgtat  | tttttgata   | ctcttcttgt  |
| 7681 | acttaaatgt  | agaccagcat  | agccttagtt  | tttttatata  | ttttacttct  | ttctctatat  |
| 7741 | ttaataatag  | gcttgaaaat  | aaatggtaag  | cctataaattg | ttaggcttag  | agctagggtt  |
| 7801 | gaaagtatac  | aacaggcttt  | gtgtttacta  | tgtagctctt  | tcaggtaaag  | catcaaaaat  |
| 7861 | ctgcaaaatt  | ttttgtaatt  | ttcttcgatg  | ttttttttgc  | tatgagcctt  | gctaataaac  |
| 7921 | atatctattg  | cggtatgacc  | gttattacac  | ttaatgttaa  | ggctctgcacc | tttttctatt  |
| 7981 | aatagctgag  | ctatatcaaa  | ataatccttt  | tgaacagcaa  | gatgtagagg  | tgcaaaacct  |
| 8041 | tggtgctcac  | aaatgttcat  | attggctcta  | acttccaata  | acattttcac  | aatttttgta  |
| 8101 | tggccttttt  | taactgccag  | tagcaaggga  | gttctgttac  | atttagtaac  | agcattaatg  |
| 8161 | tttaccttaa  | gcctcaataa  | gagcttaact  | gttttagtgt  | taccattatg  | gctagcttta  |
| 8221 | tgcagcctgg  | cgttgccatt  | aaaatcctga  | tcatattgcat | ctattccttt  | tgatacaaga  |
| 8281 | aatgtttacca | tttttctatt  | attatgctca  | atagcgcaat  | ctaattgcac  | aaaacctatga |
| 8341 | ttgttttttg  | tgcaaaaaaa  | ctctttaagt  | ttaatttttat | cgttacttgc  | ttgctgtttt  |
| 8401 | tttgcaataa  | gctttactat  | ttgcattttg  | ttgttatatg  | ctgctaggaa  | aagcgtagt   |
| 8461 | ttattttctg  | catctttggc  | ttctatatatt | gcacctttct  | ttatcagata  | ttctataaatt |
| 8521 | tctgctctgc  | tgtcataatg  | tgccgtgcat  | tgataaatgg  | ttaaaaacaa  | aggagtacga  |
| 8581 | aaattgttat  | cttcacattc  | gagatttgct  | ccgctatcaa  | ttaaaatttg  | gacgcttttt  |
| 8641 | ttagaaccgt  | atagtgaagc  | tatatgaaga  | ggagtatagc  | cctcttttgac | atctttttca  |
| 8701 | ttaatttttg  | cgccttttgt  | tatcaaaaaa  | tctattaatt  | ccgtgtcatc  | ttgtagtgca  |
| 8761 | gcaagggtgca | gtggagtaaa  | tccattttta  | tccctggaat  | taattgtcag  | ttgattaaca  |
| 8821 | aaaagtttag  | caactttctt  | gtgtccatgc  | ataatggcat  | aatgcagtgg  | atcttctattt |
| 8881 | tcgttgtcta  | cgacattgaa  | atcagcttcg  | tgctctagta  | atgactttac  | tccaactaaa  |
| 8941 | tcaccttctt  | ttgtgaactt  | gtgcaagaga  | gtgattccac  | ttgcatcttt  | tgagttaata  |
| 9001 | tcaaatccat  | tttctactaa  | ttggtttata  | tcttcctcac  | gcgccatata  | acttaaactct |
| 9061 | ctaattaaac  | tcttttcgcy  | ttataataac  | tcctacttga  | ttaaagttta  | atgaatctgt  |
| 9121 | gagaaatggc  | tagtgcattc  | ttgcataaca  | aacttttggc  | agcgcatctg  | atgaaacgaa  |
| 9181 | aaacttactt  | gacaaactcc  | gccagccccc  | ttatcatgaa  | actgaagcta  | tttatttatc  |
| 9241 | ttcgcaatct  | ctgcagtggg  | ttaatgacaa  | aaaacttaat  | gtatttggcg  | taaatcatgc  |
| 9301 | ttaatttttt  | gcactatgtg  | cacctcatgt  | ctttataaaa  | cttttaggtt  | tctacctata  |
| 9361 | caagccgaaa  | cgcgcttata  | aagtgtttta  | gacagtaaaa  | gacgtcaaat  | agacaaggga  |
| 9421 | gaatttgaat  | actagctacc  | ctagggtttc  | tttgcccttt  | tttttatttg  | gtaaatttct  |
| 9481 | taatatttat  | agctaaacga  | caactgtcat  | tccgtgaaag  | gtcaagtatc  | ccgctacttg  |
| 9541 | ttagcggctg  | agataccgcy  | aatgaatcgc  | ggatgacgcy  | ttagcgggtg  | cgtgacgata  |
| 9601 | agctcgtcat  | tccgctacgt  | gttagcggct  | aagagatatc  | gcgggtggtat | agctataaat  |
| 9661 | tggtgatata  | ttttttatat  | cacattttta  | acttacaata  | gttagccagc  | gtttctgaca  |
| 9721 | ttaaccaaat  | ttttcaaaatt | ctgcactcac  | cactacctat  | aactcacttt  | cacgcaatat  |
| 9781 | tgatcgttct  | taaaaagcaa  | tctaacattt  | tttattcctt  | gattgcgaag  | ctttgatgca  |
| 9841 | gctgatttag  | cagcctgagc  | acttttaaaa  | aatgcaacat  | atcccttact  | ttctgcactg  |

|       |             |             |             |             |             |             |
|-------|-------------|-------------|-------------|-------------|-------------|-------------|
| 9901  | tcttggtttt  | ggtgacgttt  | ctgtatttct  | tttccatact  | gctttctgta  | atgaggagta  |
| 9961  | ttttgtatca  | attgttctga  | catcttttct  | aggtattgga  | cttttacttt  | tgcaagccca  |
| 10021 | gatttatgaa  | atcctaagac  | ttgagctgct  | ttttctgata  | agtctattat  | tctaccttca  |
| 10081 | ataaatgggtc | ctctatcggt  | aacccttgta  | acaagctttc  | ttccattttc  | taaattagtg  |
| 10141 | acaagaacaa  | agcagggtag  | gggcaaagtc  | ttatgctgctg | cagagatcaa  | gtgacgggta  |
| 10201 | aacacttcac  | catttgctgt  | aagcgtgcca  | tgatcttcta  | ttccatacca  | cgacgctgtc  |
| 10261 | cctatctctt  | catagtgttt  | acagtttttt  | ggataataag  | ttataaccatt | tattgtgtag  |
| 10321 | ctgctgccaa  | ttttgtaaatg | acctgcagtg  | caattaaacc  | tggttgctaaa | actgcaacta  |
| 10381 | ctcatcaaaa  | cgaatattag  | acataggaag  | gctaggtttt  | ttatcattgt  | attcggtaag  |
| 10441 | agggttcgat  | actatgagga  | ttttaaatta  | tactataata  | aatttagtaa  | tgagtaaaca  |
| 10501 | tctactgcta  | aatattaaca  | aaactcaaga  | aggaataata  | catattattg  | gtatagggtg  |
| 10561 | aatcggaatg  | agtgccattg  | ctgaaattct  | tcacaattcc  | aattacaaag  | ttcaaggcag  |
| 10621 | tgatgcacag  | tcaaacaaca  | atgtagatag  | attacaaaag  | ctgggtatag  | aagtttacat  |
| 10681 | tggtcacaat  | gctgataata  | taagccaagc  | tcaaatagtt  | gtatattctt  | ctgcataga   |
| 10741 | atctgataat  | gtggagttaa  | ttgctggcaa  | aaataacaat  | aaaatcgttt  | tgcatagatc  |
| 10801 | agacatgctt  | gctgaacttt  | taagagataa  | atatgtgata  | gcggttttcag | gttcaagcgg  |
| 10861 | aaagacaaca  | acaaccgcta  | tgattgcttc  | catttttgat  | cattctagca  | ttgatgcgac  |
| 10921 | tgtaactgta  | ggagggatat  | taaattccta  | taagagcaac  | ttcaaacttg  | gagggagtga  |
| 10981 | cacttttctg  | atcgaggctg  | atgagtctga  | tggaactatg  | ctaaaaatcc  | ctgcaaagat  |
| 11041 | tgctgtcata  | acaagtatca  | acaatgacca  | catagattat  | tacggcacat  | ttgataatat  |
| 11101 | caaaaatgca  | ttttcccaat  | tcgtgaataa  | tgtaggttct  | gcagttttac  | ctgattctgt  |
| 11161 | agacatcgat  | tatgatgcgg  | gtaattctat  | aacgtttggg  | tttgagaatg  | gtagcataag  |
| 11221 | agccagcaac  | attaaacagc  | atgctaacag  | catagaattt  | gatgtgttga  | acaactggat  |
| 11281 | tccagcatta  | cgtgctggaa  | tgacaaaagg  | aaagtgtaca  | gagatgtcat  | cccagtgcgt  |
| 11341 | gacactggga  | tccagccctt  | taaaaaacat  | agtactatca  | aatgcaattg  | gaattcacia  |
| 11401 | agtaagcaac  | gccctagctg  | caatatcagt  | tgcgataaag  | ctcggaatta  | gcgatgcaga  |
| 11461 | gattaaaaaa  | ggccttttgg  | aatttcaagg  | agtagcaaga  | agattctctt  | tgattgccga  |
| 11521 | tattaaagggt | gttaagttaa  | ttgaggatta  | tgcccatcat  | ccaaatgaaa  | tatatgcaac  |
| 11581 | tttaacgggt  | gcacgttcga  | ttactaaagg  | aaaagtaata  | ggaattatcg  | aaccacttcg  |
| 11641 | ttttgcccgc  | attcgtaatt  | tttttgatga  | attcatacga  | attttcatga  | tgtttgatta  |
| 11701 | tgatcatcctc | actcctgttc  | atcccccaga  | agacaatcct  | attcctgggt  | gtgggattga  |
| 11761 | tgatatacaa  | aaagctttta  | tcagtaatgg  | atttaataac  | acaaaaatta  | tgaatgatgc  |
| 11821 | tttgctcatt  | tcacatttta  | ttagtgattc  | gacaagtcca  | agtgatatag  | tattatttat  |
| 11881 | tggtgctgggt | agtaatatag  | ctaagctagc  | aaaagaaact  | gcagcactta  | ttgcggaagt  |
| 11941 | taaggttttta | tgtaatgaat  | aagataatca  | ataacgtatt  | tgcaagagaa  | atttttagata |
| 12001 | gcaggggtta  | ccccactatt  | gaggtagaaa  | ttgagctctg  | tgatggcgca  | ataggcaggg  |
| 12061 | catctgtacc  | ttctggagct  | tcaactggta  | aattagaagc  | cttggaactc  | agggaccaag  |
| 12121 | atgagaaaaag | gtattgtggt  | aagggagtg   | tgaaaagctgt | tcaagctgta  | aatgggataa  |
| 12181 | tagcagatga  | aatcattgga  | atgaatgcag  | cggaccacaaa | tgcaattgat  | aaagcattaa  |
| 12241 | ttgaactgga  | tggaacacaaa | aacaaatcaa  | aacttgagac  | aaatgcaact  | ttgggtgtgt  |
| 12301 | ctcttgacgt  | tgcaaaaagca | gcagcaacaa  | gtttcaaaaat | gccgctatat  | agatatttgg  |
| 12361 | gaggaaagca  | gacgagtgtt  | atgccgggttc | cactcattaa  | cataattaat  | ggtggagtac  |
| 12421 | atgcagacaa  | taagctcgat  | ttccaagaat  | tcatgattct  | tccggtcggt  | gctgagactt  |
| 12481 | tcagcgaagc  | gattagaata  | tctgcggagg  | tattccacaa  | cttacgtagc  | attcttaaga  |
| 12541 | aaaaaggtta  | tagcataaat  | gtaggggatg  | aaggtggttt  | tgcaccaaat  | attgaaagta  |
| 12601 | ctgaagaagc  | acttgatttg  | atcatatacg  | ctatagaatc  | agcaggttat  | tcagcgcaaa  |
| 12661 | gtgattttgc  | actaggcctt  | gatgttgctt  | catctacttt  | ttatgaagat  | ggaatttacg  |
| 12721 | aatttgaaaag | taaggggctt  | acttcagaag  | agttaaccga  | atattattgt  | aaccttgtgg  |
| 12781 | aaagatatcc  | aataatttct  | atagaagatg  | caatgagtga  | agacgactat  | gaaggctgga  |
| 12841 | aattgcttac  | tgcaaaaacta | gggaataaaa  | ttcaattggt  | cggggatgat  | ttatttggtta |
| 12901 | caaattgtga  | actaatacgt  | aaaggaatag  | aggaaaaaat  | ggcaaatgct  | gtactgatca  |
| 12961 | agccaaatca  | aatagggacg  | ttaacagaaa  | cgtttaaatgc | aattgaaatg  | gcaaaaatcaa |
| 13021 | atggctataa  | agctgttggt  | tctcatcgct  | caggtgaaac  | agaagacaca  | acaatatctc  |
| 13081 | atatagcagt  | tgctgcaaat  | tgctgggcaa  | taaaaaccgg  | gtcgctatcg  | cgttctgata  |
| 13141 | gactcgcgaa  | gtataatgag  | ctaataagaa  | tagaaagcac  | gttaggaaag  | gatgctaaat  |
| 13201 | attatcgtgg  | gttagcatgg  | gttttataga  | cgaagtaaaa  | ttgtgtttta  | aagccgggtga |
| 13261 | cgggtggtgat | ggctgtgcaa  | gttttcgtcg  | agaaaagttc  | gttgaatttg  | gtggtccaaa  |
| 13321 | tggtggtaat  | ggaggaaaag  | gtggaaacat  | agttttcatc  | agcgacgcta  | atctcaacac  |
| 13381 | tttgcttcat  | tttcgttata  | gaagacacat  | taaagcagat  | agtggaaaaa  | atggtgcagg  |
| 13441 | cagggataga  | tctggcacag  | cagggaaaga  | cgttatactt  | aaagttccag  | tcggtgcaca  |

|       |             |             |             |             |             |             |
|-------|-------------|-------------|-------------|-------------|-------------|-------------|
| 13501 | aataattgat  | gaagaaagtg  | aagagataat  | agtagacctt  | gacaagcctg  | gtatggaatt  |
| 13561 | tcaagtagca  | caggggtggaa | aaggtggact  | tggaaatact  | aatttttaaat | cttctactaa  |
| 13621 | taaggcacca  | agacatttta  | cttacgggtca | gcctggcgaa  | gaaaaacatg  | tattattaaa  |
| 13681 | actaaaagtt  | ttatcagatg  | ttggaattat  | tggcatgcc   | aacgcaggta  | aatcaaaatt  |
| 13741 | tttgactcgc  | tgctcaaatt  | ccgatacaaa  | agtaggcgat  | tatccattta  | ccaccgtaag  |
| 13801 | acctcattta  | ggcatggtaa  | aagtggatga  | tagcgaagtt  | gtaatagcag  | atattcctgg  |
| 13861 | aataattact  | gatgctcacc  | ttggagttgg  | gctcgggcat  | aaattttttaa | agcacataga  |
| 13921 | aaggtgtcaa  | attttacttc  | atttaatcga  | tgtaactcac  | gatgacgttg  | tttcggctta  |
| 13981 | tagttgtatc  | cataatgaat  | tggaaacttta | caatagtgat  | cttgttgaaa  | aagaagagat  |
| 14041 | tgtagtatta  | aacaaatgcg  | acttattgag  | ggaagcagaa  | attctggaaa  | agaagaatca  |
| 14101 | cctagctaata | tatctcaata  | aagaagtgc   | gtgcttatca  | attaatgggtg | atttacagcc  |
| 14161 | tattttaaga  | ttattaagt   | aaaaattgaa  | aaagagtaat  | tctaaggaaa  | tcgatgtata  |
| 14221 | tgatcctttt  | aagatgtgaa  | tttcatttat  | tttatcatat  | aactagaata  | tatttgtacg  |
| 14281 | aacatttggt  | tttgttaaac  | acaacaaatc  | ccagtgtcag  | ctacttgcat  | ctaccacaca  |
| 14341 | actgtacgaa  | cattgcaatt  | tgcaggcaat  | ttgcgtggca  | gatgggtgtca | tcccagtgcc  |
| 14401 | cagacactgg  | gatccagcct  | tttcataatc  | atcaaaaacgt | tgtattttaa  | cataaaaacgg |
| 14461 | ctacttttat  | gcttaccaac  | ttaataaaaat | ttctggatcc  | aagtgtcaag  | cactgtgatg  |
| 14521 | acatcatagg  | ggcgctggga  | tgacaccctc  | ctgctagaca  | atgttcgtac  | agttgtacat  |
| 14581 | ctaccatgca  | agttacctga  | aaattgcaat  | gttcgtacac  | ttgactactt  | ggatctagta  |
| 14641 | tgattttaatt | aaccaagaag  | taggcatgaa  | aaaattatgt  | agtgaaccag  | tttgcataac  |
| 14701 | accaggagga  | aaatatggat  | agaaagacga  | gaatagaatc  | agacagctta  | ggggaagtaa  |
| 14761 | aagtaccaag  | tgaacattac  | tggggagcgc  | agactcagcg  | ttcttttagaa | aattttaaga  |
| 14821 | ttggcacaga  | aaaaatgcc   | gagcctctga  | ttaaagcatt  | agcaatagta  | aaacttgcag  |
| 14881 | cagcacatgt  | taacatgaag  | cagggtagca  | tagataataa  | ggtaggggac  | gcaatctgcg  |
| 14941 | cagccgcaaa  | ggaagtaata  | gatggcaaat  | ttaataatga  | atttccgctt  | gttgtttggc  |
| 15001 | aaaccggatc  | cggaacgcag  | actaatatga  | atatgaatga  | agtgatcagc  | aatcgcgcaa  |
| 15061 | tagagatttt  | aggtggtaat  | ttgggtagta  | aatctccgat  | acatccaaat  | gatcatgtga  |
| 15121 | attatggtca  | gtcgtcaa    | gacacctttc  | caacagcaat  | gcatatagca  | gcagcagacc  |
| 15181 | agataaaccg  | cttgcttatt  | ccaaatcttg  | aaaaattgca  | taaggtgctg  | gataataagg  |
| 15241 | ttcaggaatt  | taaagatata  | ataaaagtag  | gacgtactca  | tctgcaagat  | gcaacgcccc  |
| 15301 | taacactagg  | acaggagttt  | tctggctatg  | cagcccagat  | taaaaagggg  | atagagagag  |
| 15361 | taaaatcaac  | tttaagtgat  | atatatgagc  | ttgcacaagg  | tggcactgcg  | gttggcacgg  |
| 15421 | gactcaatac  | taaaaagggt  | tttgctgaag  | attttgcaaa  | gcaagttgca  | ggaattacta  |
| 15481 | accttccatt  | tacttcagca  | ggcaataaat  | ttgaagcgct  | agcagcaaat  | gatgctttag  |
| 15541 | ttgagctcag  | tggaaacactc | aatacagtag  | cagtcagttt  | aatgaaaatt  | gcaaatgata  |
| 15601 | taaggctgct  | tgggttctggt | ccaagatgcg  | gaattgggga  | aataatgtta  | ccggaaaatg  |
| 15661 | agcctggttc  | ttcaattatg  | ccaggtaaag  | tgaatccaac  | tcagtgtgaa  | gcggtgacta  |
| 15721 | tggtagtcac  | tcaagttatg  | ggaaatcatg  | ttgctgtaac  | cattagtggg  | tcaaacggtc  |
| 15781 | attttgaatt  | gaatgtgttt  | aagccagtga  | taattttacaa | tgttttgcag  | tctataagac  |
| 15841 | tttttagctga | cgcaagttta  | aatttttacag | aaaaatgtgt  | agttgggtatt | aaagcaaatg  |
| 15901 | aagagaggat  | aaaagattta  | ctgaatcagt  | cgttgatggt  | ggtcactata  | ttaaatacgc  |
| 15961 | atatagggta  | cgacaatgca  | gcaaaaatag  | cgaagcttgc  | ttataaagaa  | aatatcactc  |
| 16021 | taaaagaagc  | agcagcaaaa  | cttcaactgc  | tcactgagga  | agagtttgaa  | aggatagtga  |
| 16081 | aaccagaaga  | aatggtaaat  | tattttgtaac | cgctcacact  | taattcttca  | atctcactaa  |
| 16141 | tagaaaggcc  | agtaaacttg  | acaatagtgt  | taacatcaac  | attattatct  | tgctttgtct  |
| 16201 | accttatttt  | gccgctcccc  | tgaacggata  | cggtttaaga  | cataagatcc  | tttttcatag  |
| 16261 | ctatactacg  | ttatccagcg  | tctgggcaact | ggtttcttgg  | tacttattcc  | gcaataattt  |
| 16321 | ttttttcctt  | caataaaactt | tgcagttcgc  | ctttttcgta  | catctcgcga  | gtgatgtcgc  |
| 16381 | aaccaccaat  | aaactcttcc  | tttatatata  | attgtggaat  | tgttggccaa  | tcagaaaact  |
| 16441 | tttttataga  | ttcacgtatt  | tcatcattct  | ccaacacggt  | aatatactta  | aacttcacgt  |
| 16501 | tcaatttttt  | taggattgac  | acgacgagtc  | cagagaatcc  | gcattgagga  | aaatcagaag  |
| 16561 | tgcttttcat  | atacaataacc | acatcatttt  | ctgttatatc  | tttttttatt  | tgttcaaaat  |
| 16621 | tgctcataaa  | ttcaccttat  | tttaaagtat  | tagtttccag  | ttgcaaggcg  | tgtatagact  |
| 16681 | gaccttccag  | agctttatat  | accattttat  | gctgttctat  | ttttgtcttt  | ccaagaaaac  |
| 16741 | acttgaggtt  | tattttttaa  | tgataatggg  | catcatctcc  | agcaagatca  | tgaattttta  |
| 16801 | tatcagcgtc  | ggggaacgat  | tgtttgatga  | tcctctctaa  | ttcgtgaatt  | gcaatagtca  |
| 16861 | ttgatttgct  | ttaaattaca  | atactttcat  | tataaatcta  | aaacgattga  | gcgcaataaa  |
| 16921 | aagttgctat  | cataaaaaat  | agaagcatat  | tataataatg  | gaatgacaag  | ttatgcaggg  |
| 16981 | aggctttgtg  | gtgggcgaaa  | gattttaaatt | cacatatctt  | tggttttgc   | aactttttca  |
| 17041 | tttaggtgct  | tatcttacga  | tgataaaata  | aataacttag  | agaatgttta  | catcaaagct  |

|       |             |             |              |             |             |             |
|-------|-------------|-------------|--------------|-------------|-------------|-------------|
| 17101 | aactatTTTTg | gagcattcctt | caatgcaata   | ggttctctag  | aaggaaaaga  | agatgcaggt  |
| 17161 | gacaatataa  | cagaggggggt | ttttagtttt   | aataagaagg  | agcgaattga  | agctggatac  |
| 17221 | agtcctaaat  | atgttccagg  | gtttgccgggt  | agtgtgcaa   | taggggtattt | attcaaaaat  |
| 17281 | atgagagttg  | agtttgaagg  | cttatattct   | cagactaact  | tatatgatga  | agattattca  |
| 17341 | gataagaaaa  | aagcaagata  | tattgaactt   | cgtcgtcaca  | atgatgcgtc  | tactggagcg  |
| 17401 | gaatgcaatt  | caccttggag  | aagtggaaaag  | gttgatattc  | acattcaaga  | aaattgtagt  |
| 17461 | gttgaagcag  | agttcagagc  | tgcattttaag  | atgaaaaatg  | aagggttttaa | taacttagct  |
| 17521 | ggaatggtca  | atgtatatcg  | tgatttttaat  | atagcaaaaa  | tgccattcac  | cccatatggt  |
| 17581 | ggtattgggtg | caggtgtaac  | taggggttaaa  | tttctaggaa  | aaaccagata  | tgcttgggt   |
| 17641 | taccaagcaa  | aacttgggtat | caatcaccaa   | cttacagcac  | aaactcaagc  | atttgctgggt |
| 17701 | ttacgctatt  | ttgggtatcct | tgataaccaa   | tttaaagata  | ttgtaccagg  | aataaagata  |
| 17761 | ctagctgggtg | aaggatatat  | tcctgccgggt  | ggaggaagta  | aagttgatga  | aactgcacgt  |
| 17821 | gttgaatcaa  | caactgcaac  | cattaccaat   | aggtttggca  | tatatggctt  | agagtttggg  |
| 17881 | ttgggtttatc | acttttaact  | ttatccaata   | aattacatat  | gtgaagatag  | taaattcagc  |
| 17941 | gtgctgagaa  | cattagaaaag | acgagatttt   | aattgatttt  | catattttact | ccaatcttgt  |
| 18001 | attgcctttc  | ttgcaacacc  | tgaatcaact   | gcggcttttg  | caacagcagg  | agctactata  |
| 18061 | gaaattaatc  | ttgggtcaaa  | tggagtaggt   | attatatatt  | cacgtccata  | gcccatttta  |
| 18121 | cgaccgccat  | agactgcaga  | tatctcacct   | ggtactgggt  | cacgggcaag  | ctttgctatt  |
| 18181 | gcatctgcag  | ctgcaatttt  | catttcatca   | tttattggtg  | ttgcatgtac  | atcaagtgcc  |
| 18241 | cctctaaata  | tataaggaaa  | acccattacg   | ttgttgactt  | ggttggttgta | atctgacct   |
| 18301 | ccagttgcaa  | ttattgcatc  | tggcctcaca   | gattttgcaa  | actcaggcct  | tacttctgga  |
| 18361 | tcgggattgg  | caagagcaaa  | aataatcggg   | tctttgcca   | tactctttaa  | catctcttca  |
| 18421 | tttaacacat  | cttttgcala  | tagtccgatg   | aatacatcag  | cgccttttat  | tgtatcaagt  |
| 18481 | agagaacggt  | cggaagtatc  | aattgcatat   | tttctcttcc  | actcattcat  | gtcctcggtt  |
| 18541 | ctacctttgt  | atattactcc  | ttgcttatca   | cacagcacta  | tatttttagc  | gcccattggac |
| 18601 | tttagtattt  | ctaaacatgc  | aataccgggt   | gctccagcac  | cattcataat  | gatcttaacg  |
| 18661 | tcctctaatt  | tcttttcgac  | aatatcaaga   | gcattttcta  | taccagctgc  | aacaaccact  |
| 18721 | gcagttccat  | gctgggtcatc | atggaacact   | ggaatatcca  | tcagttcatt  | cagacgtttc  |
| 18781 | tctattataa  | aacaatcggg  | agatcttata   | tcctctaaat  | ttatcccccc  | ccaacttggc  |
| 18841 | ccaaggtacc  | ttactgcatt  | gataaaaatct  | tctatatattt | ctgtaccaac  | ttctatatca  |
| 18901 | actgcatcaa  | tatcagcaaa  | acgcttaaat   | aaaacagctt  | tgctttccat  | gacaggtttt  |
| 18961 | gcagcaagag  | gaccgatatt  | accaagtcca   | agcactgcag  | tgccattttga | aatgacagca  |
| 19021 | acacagttgc  | tttttgccgt  | ataatcataa   | ataacctcag  | gattttttagc | tatttcaagg  |
| 19081 | cacggagctg  | caacgccagg  | ggaataagca   | agtgcacaaat | catactgggt  | agataaagggt |
| 19141 | tttggttgga  | tgattgaaat  | tttaccaggc   | ttaccacctc  | tactgtgata  | attaagtgcc  |
| 19201 | tcttggtttt  | tggtactatc  | taaatcatcg   | ttcatcatta  | catccttata  | ttttaagctt  |
| 19261 | atatttttta  | agtatatgga  | gtttttataa   | atgttcaatt  | gtaaactatt  | agcttgtgaa  |
| 19321 | ctctggtgta  | cttctgtata  | agttttacct   | ctacgtagaa  | tggtattaca  | tgcttaagaa  |
| 19381 | aaacgtgcct  | aatttgctta  | caattttctcg  | tgcgcttgca  | gtaccagcaa  | taatattaag  |
| 19441 | tttttatata  | gaaaataaat  | atgcaggcct   | gataacaata  | tcaatctttg  | tggttgcggtg |
| 19501 | cattacggat  | ttttttgatg  | gttacttggc   | gcgtgcgtgg  | aaagtccaat  | caaaatttgg  |
| 19561 | caagctattt  | gattcaattg  | ctgataaatt   | aatagtgggt  | tcaacgataa  | ttatgctagt  |
| 19621 | ttataagcag  | aagataaatg  | atttttacaat  | agtaccatcg  | attatcatca  | tctgtaggga  |
| 19681 | gatattagtc  | tcgggtttgc  | gggagttttt   | gatagctaca  | aatgttagtc  | tacctgtaag  |
| 19741 | caaagctggc  | aaaattaaaa  | cattttttgca  | gatgggtgct  | gtagtagcgc  | taataatgaa  |
| 19801 | cgattattat  | atgattcaat  | atacagggtgc  | gatttgttta  | tggttgcgag  | ctattataac  |
| 19861 | tatgtggtca  | ggctataatt  | atctcctagc   | cggcatacaa  | cagattgggt  | aaatctccta  |
| 19921 | ggaaatagtt  | aatagacaag  | agtagttaat   | atcttagtga  | tattgactca  | gaaagcaaaa  |
| 19981 | aggtgtataa  | ttgtattaac  | ttacaactaa   | ttaggttaat  | attatgaaaa  | tacctagtgg  |
| 20041 | caaattttct  | tctaccaaaa  | aggttccagg   | aaagaataag  | aaaaaaagag  | attttgaacc  |
| 20101 | attagaagag  | tttttttggg  | attttttggc   | aacagttgat  | aaagaagtca  | aaagagaaag  |
| 20161 | gctagaacaa  | gaactattag  | cactaaaaaa   | aagagagcta  | tatagacaat  | gtgtatcatt  |
| 20221 | ggtaacaatg  | gttccatttg  | cattattttat  | ggctattgaa  | ctggaaaaaa  | tatgtagcga  |
| 20281 | tcaggtatta  | cttggcggtga | taagtggcgc   | gctaagccac  | actatattac  | cttttacagt  |
| 20341 | cttatctctt  | atttgtacgc  | tatatttaat   | ttacaataat  | aggaagatag  | cacaaaaaga  |
| 20401 | acgagagttg  | gagattattg  | aaaatggaga   | ggaggtaaag  | gaaaaagagc  | acaatatttc  |
| 20461 | tgatataggt  | cagtgtttga  | tctatatattga | ggctataaca  | actgcactgg  | ttattgtagg  |
| 20521 | tatgataatg  | ggtgaaacat  | cttcacttga   | agcagcagag  | gatgcaattt  | tatttcttgc  |
| 20581 | caatgcaatt  | gcttttcttg  | caactcttgt   | ttcttatatt  | gataagcatg  | aaaaaaaataa |
| 20641 | gaaaaaggaa  | acagaaaagt  | ctgatcttga   | tgagaaaatct | agcaagaaaa  | ctagcaatat  |

|       |             |             |             |             |             |             |
|-------|-------------|-------------|-------------|-------------|-------------|-------------|
| 20701 | atctgtagcc  | ggattggcgc  | ttgctgggtc  | ttctatatatt | ttaataagaa  | ggataatggt  |
| 20761 | aatggcatta  | gcacgtcct   | taaatcctgc  | tggtggacct  | actttaggct  | tgataggtat  |
| 20821 | tgcaattttt  | atggctgtac  | agatcttaac  | tatacattcc  | tacagcaaga  | cgctgaaaga  |
| 20881 | tccaaaagtg  | gaaggacgag  | gtgaatcaag  | aaatgcaggt  | agttctgacc  | gtagttataa  |
| 20941 | agaagaaggg  | cgggctattg  | cctaagaaat  | ttattttatt  | aagtaatat   | taggtctata  |
| 21001 | ctttattttg  | atcgaaaaaa  | atcttatgta  | taagacttta  | atcacgtgct  | ttatttttct  |
| 21061 | aatttgctcc  | tttacacaat  | cgtatgcgga  | tgatcttgaa  | aaaactgaaa  | ctgaactata  |
| 21121 | tgaagaagca  | gttgaacttt  | ttgaccagaa  | aaaatataaa  | caagctatta  | gggcatttca  |
| 21181 | caagatagag  | gatttgatc   | ctttgtctta  | ttgggcaatg  | aaagcgaaat  | tattatctgg  |
| 21241 | agtttctcac  | tataatatgg  | gtaactatag  | cagtgtgca   | agtgatatgg  | ctgattatat  |
| 21301 | atatgtttat  | tcaaagtgtg  | aagattttacc | atatgtatac  | tacttaagag  | tattatctta  |
| 21361 | ttacatgcaa  | attaataaag  | tgcaacttgg  | acagcaaact  | gcatataaaa  | ctttagagct  |
| 21421 | ggctacagaa  | tacattaatc  | tctttccagg  | cagcgaatat  | gtagacgaga  | taaaggaaaa  |
| 21481 | aacaaagcta  | atcacagagc  | atatatcaac  | aaaagagtat  | tctatcggtg  | aattttacct  |
| 21541 | gaggcgtggg  | gaatattttag | cagcaattaa  | gcgtttccag  | aatatggcaa  | gctataagga  |
| 21601 | ttctaaatat  | ttttctaaat  | ctattaacta  | tttaaatagca | gtccattcag  | ctattggcct  |
| 21661 | tgacttagaa  | gctgagcagt  | atgaaagtat  | gttatttagca | gaaaacctac  | aagatgcaa   |
| 21721 | gccggaggct  | tgaaaatttg  | ctttagcttt  | ttctatgctt  | tgatatataa  | tttagatttt  |
| 21781 | taactatttg  | aatatggctg  | gtcattcaca  | attttcaa    | ataaaacatc  | ggaaaggcgc  |
| 21841 | tcaggatgca  | aagcgctctc  | aaaaattttac | gaagctgatt  | agagaaataa  | cagttgctgc  |
| 21901 | aaagcaaggg  | ctaccgcgac  | acgaactcaa  | cccacgcctt  | cgttctgcta  | tatttgctgc  |
| 21961 | gcgcaaggaa  | aatttgccaa  | aagataaaat  | agaaacagca  | ataaaaaaatg | caactggtaa  |
| 22021 | cgttgctgga  | gaaaattatg  | aggaaatcca  | atatgaaggt  | catgggcctt  | ctggcactgc  |
| 22081 | actcattgtc  | catgccttga  | ctaataaccg  | caaccgtact  | gcttctgagg  | tacgttatat  |
| 22141 | cttttctcgt  | aaagggtgaa  | atttaggaga  | aacaggaagt  | gttagttacc  | ttttcgatca  |
| 22201 | tgtaggctta  | atcgctctata | aagcagaggg  | tgtgaatttt  | gacgatttat  | tcagtcattg  |
| 22261 | aatcgaaata  | gaagtattga  | atattgagga  | aaatgacaaa  | gaaggattac  | acgttataac  |
| 22321 | ttgtgaaata  | aaagattttg  | gtaaagtacg  | cgatgccttt  | tatgcaaaat  | tcggagaacc  |
| 22381 | agaacttgct  | cgtctttcat  | ggcagccaaa  | agatctgatt  | gaaatttagcg | ataaagagtt  |
| 22441 | gattgataaa  | ttatctgcat  | tggttgaaga  | gctggaagat  | aatgatgatg  | tacagtatgt  |
| 22501 | ggaaggtaat  | tttacttttg  | ttgataagct  | atgaggctgg  | taatatattgt | attgctttgt  |
| 22561 | attttaccag  | catatgctac  | tgaaacatca  | acagatcttg  | cacagccatt  | ccagcatgga  |
| 22621 | atcagaaaaa  | aaaagctact  | ttgacgacag  | aaagtgatag  | aaagttgtta  | ttcatatcca  |
| 22681 | gtaccataaa  | atcttccttt  | tttgccacgg  | aagggttggc  | gccaaataca  | gtggtgaaat  |
| 22741 | tgatcaacat  | atataaagat  | tttggtgttg  | attttaaaaa  | agacattgtg  | ccagagagta  |
| 22801 | aattggaggt  | tctttttgag  | agattgccta  | ataatcagaa  | gactgaagaa  | aaaattttat  |
| 22861 | atgcttcact  | gacaataaac  | aaaaaagcta  | ttagtttata  | tcattataaa  | tcacaagacg  |
| 22921 | gcaaagaaag  | gtattttaat  | aaagaaggaa  | taagcttaaa  | aaatggcgaa  | atttttgcaa  |
| 22981 | atccttttaa  | tggagattat  | cgcatatcct  | caaaatttgg  | caatagaaag  | catcctgttc  |
| 23041 | gcggtaaaaa  | tgcttttcac  | aaaggagtgg  | attatgcagc  | taaacttggc  | actcccatat  |
| 23101 | acgctgctgc  | agagggtgtg  | atagaatata  | taggaaaagaa | tggtggctat  | ggaaattaca  |
| 23161 | tcaaaataaa  | acacaaaaat  | gagtattcaa  | cctgttacgc  | gcatataagt  | agatttagtg  |
| 23221 | gcgatataaa  | gttaggctct  | aaagtaaagc  | aggggcaggt  | catcgcctat  | gttggttagca |
| 23281 | ctggtgttgc  | aacaggacct  | catttacatt  | acgaagtatt  | atataacggc  | aaacacatcg  |
| 23341 | atccgcttac  | gatagcgcac  | aaaactgaag  | taaaattgcc  | tgatcatgaa  | ttaagagagt  |
| 23401 | ttaaactatt  | tgtaaataag  | ataaataaaa  | cgatcaacag  | agagggttca  | agtgaaaaag  |
| 23461 | aagttttaaag | acaatatgga  | taagaatacg  | ataaacgata  | gaaatttaaag | tcaactccgg  |
| 23521 | ttttttcctg  | tactaatagc  | gctaggatta  | attttatcgc  | tgcttttttt  | ggcatatgac  |
| 23581 | agcacaattg  | cacttgaggt  | tgctgccgtt  | tcaatttttg  | cttttcttca  | aggatttttt  |
| 23641 | attaatgacc  | ctaataagc   | aagagtgata  | gagttttttg  | gtcattatat  | tggaaacttat |
| 23701 | tttaagtctg  | gaatatgtgt  | aacgcttccc  | ttttcaagca  | aatatatagt  | ttccctaaaa  |
| 23761 | tttcaaaata  | tcaacacaga  | aaaaataaaa  | gtgaatgatg  | ccaatggaag  | tccaatagag  |
| 23821 | atctcagcag  | tgattgtttg  | gagagtgaac  | agcccggcga  | aggcgatta   | taatgttaac  |
| 23881 | aactatcacg  | aatttgtttt  | tgtacaaagt  | gactcagtaa  | taagagaatt  | agcaagcaat  |
| 23941 | tatccgtatg  | atagcgaaa   | cgatgaggag  | tctttacgta  | aaaattctga  | taaaatttca  |
| 24001 | gatgaattgc  | ggtcaatgtt  | acaacaaaga  | ttagatatgt  | caggaattga  | gattacagaa  |
| 24061 | gcaagaatat  | cgcatttggc  | gtattcgtcc  | gagattgcac  | aagcaatgtt  | aaggcgtcaa  |
| 24121 | caagcacatg  | ctatcacttc  | ggcaagaagg  | catatagtgc  | aaaatgcaat  | aggaattgtc  |
| 24181 | gaggaagtaa  | tagctcattt  | tgaaaaaaac  | aaaagcttac  | aattagatgg  | caagcaaaag  |
| 24241 | gttcaattga  | taaataattt  | gttggttgcc  | ctaactctctg | agcaagatgc  | acaaccgaag  |

|       |             |             |             |             |            |            |
|-------|-------------|-------------|-------------|-------------|------------|------------|
| 24301 | attagtttag  | ataataatta  | gcataggagc  | cgattggggt  | tcataaatgc | aagtcactat |
| 24361 | taattttcttg | attaatagac  | taaatgatgt  | tataaattac  | acgcattagg | ggtgctctag |
| 24421 | aaaagctgag  | agtacataaa  | gtacaaccct  | ttgaacctga  | tattgttaaa | gcaagcgtag |
| 24481 | gaaaatgtat  | gtatataaat  | attgaagaat  | gcttcggctt  | cattgcgtta | attgcatctc |
| 24541 | taattggatt  | atcacctcaa  | gtatataaag  | catatatcac  | taaagttact | cgtgatgtat |
| 24601 | cgatgttaat  | gttagtaaac  | tatcttattt  | gttcattgtc  | ttggattggc | tatggctctt |
| 24661 | accagagctc  | aatttttgtg  | gtgcttagca  | atattgctgg  | attagtgatt | agcataatat |
| 24721 | caattattca  | aaaatgttac  | tacgatgcaa  | aacctgcacc  | atgatcatgt | gctgcactgc |
| 24781 | agtacacaac  | aacaatatcg  | ttctattgta  | gtgctaaatg  | gaaaaatacc | gagctcatcg |
| 24841 | ttttttaaac  | gagatatacc  | tattattgct  | gtagatggag  | gagcaaacaa | gcttctatca |
| 24901 | attggcgtaa  | aacctgatct  | tgtagtagga  | gatttggata  | gcgtaaatct | ggatttacgt |
| 24961 | gctaatttga  | atacgatata  | tctacctgat  | caagattatt  | gcgacttttc | taaagcaatg |
| 25021 | gctcacttaa  | aaacagtaaa  | gttattgcca  | tcaatagtaa  | cgggtattac | tggaggagca |
| 25081 | attgatcaca  | tactacagaa  | tattaacatt  | tttctaagta  | cgggcagtat | cttttacaca |
| 25141 | ccttcacctc  | ccatggtagg  | ttacacttta  | caaaaaggta  | ttaccattt  | tttttctttg |
| 25201 | ccaaaaaata  | ctaaaatatc  | tttacttggt  | ataccgagag  | cttaaatatc | aactaaagga |
| 25261 | ttaaaatggg  | aactgcacct  | tagtaatctt  | gcttttccgg  | gaaaaaatte | ttgctttaat |
| 25321 | cgaagtttag  | gcaataaggt  | atccgtagaa  | gtacacagtg  | gtatatgtct | agcaatgatt |
| 25381 | tatttagaga  | cagtagatga  | tgctgcaaga  | catcatgtgc  | gtcaagttaa | gaagtaaata |
| 25441 | gacttcttgc  | ataacccaaa  | ctaagtagaa  | aaaaggatc   | atccaagtag | ctgacactgg |
| 25501 | ttcctttatg  | acgtgtcatt  | ccagtttcag  | ctacttgaat  | gacagcagtc | ctacgtcata |
| 25561 | ccgccgcggt  | atctcttagc  | cgctaacaag  | cagcgggatg  | acgaattgct | taaccgtcat |
| 25621 | accgccacga  | accgtcatac  | cgccgcagac  | cgtcataccg  | ccgccgtatc | tcacccgcta |
| 25681 | acacgtagtg  | ggatacttga  | tctttacagg  | gatgacgggt  | gtcaggctag | cctgtcatcc |
| 25741 | cagtgcccgag | acactgggat  | ggctttgttg  | catcgctcaa  | gtgaaaagaa | ctggcagtta |
| 25801 | ctgacaaaat  | tcattataaa  | tagccattta  | actggtgaag  | aaaaaatatg | ccacaaaaaa |
| 25861 | tgagagtcag  | taactgccat  | gaatataaca  | aatttctcca  | agaaagagga | agcatttttt |
| 25921 | gttatatcaa  | tgacgccata  | gaaaattggg  | acgagaattg  | tccaaaaatg | cagggcggca |
| 25981 | actatattta  | tagtgataaa  | gttgtgattt  | tgggtgcata  | aatcgtcagt | ttctttagaa |
| 26041 | ttggtttaag  | acaaacagtc  | gggtttataa  | aagggtattt  | gcaacaaata | ggaagagatt |
| 26101 | tggcagttat  | cagctattca  | caagcatcaa  | gaagggttaa  | gaaacttaat | attaagataa |
| 26161 | atgattgcag  | aaaataatat  | ggaagatatc  | gaaattgcta  | tagacagtag | aggaattagt |
| 26221 | atatacaaca  | acactcctgg  | tcacagcaag  | gaaaatagca  | ctgacagaaa | atatcgtggc |
| 26281 | tatgagcaaa  | cgagaaaatt  | gcacgtaatg  | ttgaatataa  | acaacaaaaa | agccatagct |
| 26341 | gtaaaataca  | gtaacgggtg  | ctactctgat  | cactatggag  | cttgtgattt | gctaaaagaa |
| 26401 | gttgatttttc | agcatgccat  | aaaagcacta  | tatgcagata  | gagcatgtga | taggcacaa  |
| 26461 | ttttataagt  | tgtgtaacga  | atatgatata  | aagacaaaaa  | ttccaccaat | aaacaatgcg |
| 26521 | gcagaacatc  | cagaaataga  | ttatatgtct  | gacaggaatg  | ctgctattag | gttaataaaa |
| 26581 | ttatacgggtg | aagatggcat  | gaaagaatgg  | aaaaaagaag  | taaattatgg | gaaaagatct |
| 26641 | tatattgaag  | ggtttttctc  | aagattaaag  | caaataattcg | gatttagttt | taggaataaa |
| 26701 | tctgagataa  | atcgagaaaa  | agaactgcta  | atcaaagtct  | atttgcttaa | taaattcact |
| 26761 | gatattggta  | tggctaaatt  | tgagatagtt  | acatgaattt  | accataaatc | accatctcat |
| 26821 | aaagtgtgat  | gcaacaaagc  | ccacttggat  | ccaggaattt  | tattaagttg | gtaagcataa |
| 26881 | aagtgttatg  | taaaatacaa  | cgttcttgat  | gggattgcgt  | gaaaggctgg | atcccagtgt |
| 26941 | caagcactgg  | aatgacatca  | taggagcact  | gggatgacac  | cctacttaac | cgtcataccg |
| 27001 | cgattttatc  | gcgggtatctc | aaagcataga  | tcccgcctaac | acgtagcggg | atgacgattg |
| 27061 | tcgttttagct | ataaacatta  | agaaatttac  | caaacgaaaa  | aaaaggcaaa | agaagccctg |
| 27121 | aggttattat  | ccgcttttaa  | atattggcgt  | tttttatggt  | ttaaacgctt | gacaagcgag |
| 27181 | attcagccgc  | ttttaattgc  | aactaaccta  | tgctgcaaat  | gtttaagaaa | tttactaagc |
| 27241 | agaaaaaaag  | acaaagaatc  | cccaggttag  | ctagtctttt  | actatctctg | tcgagtattg |
| 27301 | gcatttttttg | atgtcttgta  | acgctttata  | agcgcgttca  | gcttattttg | ataaaaaatc |
| 27361 | agatgtagat  | gaagttttgt  | aaagacatac  | agtatctata  | tactgcaaaa | aattgaacat |
| 27421 | aagacgccga  | tacattaagt  | aatccttacc  | ttttaatctg  | cagattggcg | aaagcaataa |
| 27481 | caatagcttc  | agtttcatga  | taggggggct  | ggcggagttt  | gtcaaggaag | tttttgtttc |
| 27541 | tactgaatga  | cagttgtggc  | ttggggaggta | gtgcaagaag  | tctattgtat | tactgaatca |
| 27601 | ttaataattc  | agtaaatagtg | cctgctatgt  | agctaaaaat  | ttcctttaac | ttaagctata |
| 27661 | tgtagctaaa  | ataacttggg  | tttaccgacg  | atgtgacaaa  | cgacaaatc  | gtcatcccg  |
| 27721 | tacttgtttag | cgggatctag  | agatgccgcg  | gcgggatgac  | cctgacttgc | attagctatg |
| 27781 | tataataaag  | ggaatctatg  | acaaaagaat  | cattggtaaa  | aactgatata | gtgaaagtgt |
| 27841 | aagacaaaaa  | ggcggtaaga  | agctttttta  | aaatactagg  | tggagtggca | gatgctgtaa |

|       |             |             |             |             |             |             |
|-------|-------------|-------------|-------------|-------------|-------------|-------------|
| 27901 | gatcgtggat  | tggtaacatc  | agtcctgatt  | taagcaacag  | tcgcgatatc  | gatagtttag  |
| 27961 | tcttgaagat  | gaacgagtg   | ttaaataccaa | agggagggga  | ggtttcagca  | cgtaaaaacg  |
| 28021 | ctgtatctct  | tggtaacttg  | tacttaagct  | tatcagagaa  | aggtaaaata  | aaatctctac  |
| 28081 | aaaccctggc  | agaaaaat    | aatccgaata  | aagcggaaat  | agatgagaaa  | attagagagt  |
| 28141 | ataagaaaaa  | ccaagatccc  | gagttaaact  | ataaat      | acaggattta  | ataaaaaattc |
| 28201 | ttgaatcacc  | gcgttctaaa  | atattaaagc  | aatttatttc  | tttaccagaa  | ggccttaagt  |
| 28261 | ttattgttga  | tatgcgttct  | gatgtgctta  | agctaaagaa  | ccaatataga  | agcttgaatc  |
| 28321 | cactagagag  | cgaattaaaa  | aataactct   | atacttgggt  | tgatgttgat  | ctactcgatc  |
| 28381 | ttcgtcaaat  | cacctgggat  | tcacctgcat  | cattgctaga  | aaaacttata  | aaatatgaag  |
| 28441 | ctgtgcataa  | aatttcctct  | tggggcgacc  | taaaaaacag  | actagactct  | gatcgtctct  |
| 28501 | gttttgcttt  | ttttcattac  | aagataccaa  | acgaacctct  | aatttttgta  | gagggtgcat  |
| 28561 | tgggtggataa | gattgcagat  | agcattcaac  | accttttaga  | tgagtcagta  | ccttcaaatg  |
| 28621 | atccgagtaa  | tgcgagcact  | gctatattct  | attcaatatc  | aaataactcaa | gcagggttat  |
| 28681 | ctggaatcag  | ccttggtaat  | tttttgatca  | aaagggttgt  | agaaaagcta  | tcacaggagt  |
| 28741 | ttaaaagtat  | aaaaacatat  | gcaactcttt  | ctccaatacc  | tggcttttacg | aatgggctaa  |
| 28801 | aaaacaatct  | aaaccaagat  | gtcactttat  | tgggcaaact  | aaatataaaa  | caatctagt   |
| 28861 | cagaaat     | agaaagtgc   | gagcaattaa  | aaactaatgt  | tgaatgtaca  | aatgaaacta  |
| 28921 | aacaatacat  | gcttaaacta  | tgtgcatatt  | atttactaaa  | agtgaataat  | agtaatggaa  |
| 28981 | atacttatga  | cccgggtggcg | cattttcatt  | taagcaatgg  | cgcataata   | aaacaattaa  |
| 29041 | actggatggc  | ggatacttct  | gaaaagggta  | ttagtcagtc  | agccgggatg  | atggtaaatt  |
| 29101 | atctatatga  | gttgccataa  | atagataata  | atcatgaaaa  | ctatatgggt  | aataaagtga  |
| 29161 | tttcctgctc  | gaaaaaagt   | tcgtctatgt  | tgaaggagta  | aatagtctct  | taataaagga  |
| 29221 | ttgccctcac  | aacacttaaa  | atgtaaaata  | gtttcactaa  | ttaagtata   | tgggccatga  |
| 29281 | atgaacaaca  | taaggaattt  | cgcaataata  | gcgcataatag | accatggtaa  | gtcaacgctt  |
| 29341 | gctgaccgtt  | taatagagga  | atgtaacggc  | cttgaagcaa  | gagaaatgac  | caatcaaata  |
| 29401 | ctcgattcaa  | tggatataga  | acgcgaacgt  | gggattacaa  | ttaaggcaca  | gacggtaaaa  |
| 29461 | ctcaattata  | cggcaaacga  | cggtaatcaa  | tattgcctaa  | atctcatgga  | cacccaggt   |
| 29521 | cacgttgact  | tttcttacga  | ggtaagtcga  | agcttagccg  | catgtgaagg  | ttcactttta  |
| 29581 | gtggtagata  | gtagccagg   | cgttgaagca  | caaacccttg  | caaagtata   | taaagctatt  |
| 29641 | gacaacaacc  | atgaaataat  | agttgtgctc  | aataaagttg  | atcttcctgc  | tgcagatcca  |
| 29701 | gaaaaggtaa  | aactccagg   | tgaggaagta  | attggcattg  | acgcaagtga  | gtcagtttta  |
| 29761 | atatcagcaa  | aaactggact  | tggaaataaaa | gatgtactgg  | aagcaatagt  | agcaaaactt  |
| 29821 | ccagctcctc  | aagggtgatgt | caatgctcca  | ttgcaagcaa  | tttttagttga | tagttggtat  |
| 29881 | gacacttact  | taggagtagt  | aatttttagtg | cgagttaaaa  | atggagtgct  | aaaaaaaggc  |
| 29941 | atgaaaattg  | ttatgatgtc  | taataatgct  | acatatcaga  | tagataatat  | cgggtattttc |
| 30001 | acccttaaaa  | aagtgatgac  | gggtgaactt  | tcagcgggtg  | aagttgggtt  | tataactgct  |
| 30061 | tcaatgaagg  | aagtagcaga  | ctgcaaggta  | ggggacacta  | tcactgagga  | aaagagacct  |
| 30121 | tgtagtaaa   | cacttcctgg  | atttaaagaa  | gtgcatcctg  | tggtattttg  | tagcattttt  |
| 30181 | cctcataaaa  | cggatgat    | taaatatcta  | agagaagctc  | tagaaaagtt  | acattttaa   |
| 30241 | gatgcaagtt  | ttaccttcga  | agctgaaact  | tcaaatgcac  | taggctatgg  | atttcgttgt  |
| 30301 | ggttttttg   | gaatgttgca  | tcttgaagtt  | attcaagaaa  | ggctcgagag  | agaatttgat  |
| 30361 | ttagacctaa  | cagcaactgc  | accgagtgtt  | atatatagg   | ttacaacacg  | aagtggtgaa  |
| 30421 | gttttgaata  | ttcataaacc  | aagtgatatg  | ccagatccaa  | cgaaaattga  | aattgtggaa  |
| 30481 | gagccgtgga  | ttactgcaac  | aataatggtc  | cctgaccaat  | acttgggaga  | gattctatct  |
| 30541 | ctatgtgaag  | aaaggagg    | agaacaggag  | gatttatctt  | acattggtaa  | cacaacaaca  |
| 30601 | gcattgttaa  | gatataaatt  | accactatct  | gaagttgttt  | ttgactttta  | tgatcgatta  |
| 30661 | aatcaat     | ccaaaggata  | tgcaagtttg  | gattgggaaa  | tttccagcta  | tctggtaagc  |
| 30721 | caaatagata  | aattaagctt  | tttaattaat  | ggagagcccc  | tagatgcact  | ggcttgcata  |
| 30781 | gttcacaaaa  | gtagggcaga  | aaaaagggg   | cgtgaaatat  | gtgcacgctt  | gaaggatcta  |
| 30841 | ataccacgtc  | agcaatataa  | aatcgcgatt  | caagcggcag  | tgggcggaaa  | aattattgcc  |
| 30901 | agagaaacga  | ttaacccata  | cagaaaagat  | gtaacaacta  | aactctatgg  | tggagatgta  |
| 30961 | acgcgaagaa  | tgaaactact  | tgaaaagcaa  | agaaggggta  | aaaaaaggtt  | acattctata  |
| 31021 | gggaacgtaa  | atattccaca  | gaatgctttt  | attcaagcct  | tgaagataag  | tgattgatct  |
| 31081 | taaaagactt  | cttgatatagt | ttttggcaac  | aaccgttaga  | aacgaaaaaa  | cttacttgac  |
| 31141 | acccttcgcc  | agccccctta  | tcatgaaact  | gaagctat    | atttatcttc  | tctgtacaga  |
| 31201 | ttaaatagaca | aaaaaactca  | cgtatctggc  | gtttcatgtt  | taattttttg  | cactatgtgc  |
| 31261 | accttatgtc  | tttataaaa   | tctaggtttt  | tacctaatat  | aagctaaaa   | gcgcttataa  |
| 31321 | agcattttaa  | acataaaaaa  | aacgccaaact | taaaaaatgg  | atagtgaata  | actagctacc  |
| 31381 | ctagggtttc  | ttttgccttt  | ttttctgttt  | agtaaat     | ttaatgttta  | taatttagat  |
| 31441 | tagttgcggt  | ttaaaagcaa  | ctaaatcgcg  | gttattaagc  | atttagaata  | aaaaaacgcc  |

|       |             |             |             |             |             |             |
|-------|-------------|-------------|-------------|-------------|-------------|-------------|
| 31501 | atacttgaaa  | gtataatgta  | agtaattagc  | caaccacggg  | gcttcttttg  | cctttttttt  |
| 31561 | tatttggttaa | atcttcta    | gtttatggct  | aaacgacaac  | cgatcatccc  | ctgcttggtta |
| 31621 | gcggctaaga  | gataccgcga  | atgaatcgcg  | gtatgacgtg  | ggaaaccttt  | cttggggttag |
| 31681 | ctatagagtt  | gactttttta  | ttatgggtatg | tgataattgc  | agtgttatta  | agttttagtgg |
| 31741 | taaaatgata  | atggatatag  | cctattttagc | agcacttata  | gcagcagcta  | taataaaaaat |
| 31801 | agcagcagta  | atactttgtg  | ctataatgtg  | tataagcatt  | ttcttttatat | tatttaagggg |
| 31861 | aaaaagaaca  | cttagattca  | aaaggatttc  | tatctcttct  | gaaaacagta  | ggtgtaattt  |
| 31921 | atataatact  | atcaattata  | tctctcccac  | ttattatatt  | aagccttact  | actccgtcac  |
| 31981 | ctctggtagt  | aggtatagta  | ggtgggtatcg | ttgggtgctat | ttccataata  | ccattaatag  |
| 32041 | tagcttacat  | tttgctttca  | ataacatcga  | aaggattgtc  | tcaacagcct  | gaaaattatc  |
| 32101 | agcacttggt  | cttaacttct  | cttttactgt  | ttattggaaa  | catcatagct  | ggagctttta  |
| 32161 | tcgctgtaag  | tggtgttttt  | ccaatatgta  | aagtagattc  | cttatcatct  | ttatcagcag  |
| 32221 | cactagagtc  | cttacctgca  | gtaggaatac  | atgcactagc  | acttacgatt  | gcaactgcaa  |
| 32281 | ttggagtagt  | tattgtaatc  | gatctcgcta  | agcaagctaa  | ggagtacata  | tcaggtaaaa  |
| 32341 | taatgcaagc  | agaaaaagaa  | tctgtgactg  | atacacataa  | agaaccagac  | tctaaagtgg  |
| 32401 | atgaagcaaa  | agaaggaaat  | gttaaaaaatg | agcggaaagt  | acctcttttg  | ccctaaatat  |
| 32461 | aaagatgtca  | tcccagtgct  | cctttttttg  | tcatccaagt  | agctgacact  | gggatccagg  |
| 32521 | ttgctcacia  | gcaaactagc  | atagaaagtg  | gttacaacgt  | tttcgatgag  | attgcagaaa  |
| 32581 | ggctggatcc  | cagtgggctt  | tggtgcatcg  | ctacttatga  | aaggctaact  | ataattagga  |
| 32641 | ttataagcaa  | cttattgaaa  | atcttgtttt  | tttgcaatca  | atctgatcaa  | atttaagaat  |
| 32701 | agtaatttgt  | tatttatatt  | aataaattta  | attctattga  | aaatagctaa  | agcattgaaa  |
| 32761 | ttcttgaatt  | ttagccggat  | tagtgagtgg  | tagtgaaatt  | tcttttactc  | aaatttaggt  |
| 32821 | attcactgac  | cgttcttggt  | ataaatacca  | gaataataag  | ctactgatat  | tctccacctt  |
| 32881 | ttttatcttt  | aatccatcat  | agctagcgat  | gcaacaaagc  | catcccagtg  | tcaagcactg  |
| 32941 | ggatgacagg  | ggagttggat  | gacaccgtct  | tggtgggaaa  | tcagtgtcag  | ctactttcat  |
| 33001 | gacaaaaaga  | gggcacttgg  | atgacaggag  | aaggaagcat  | tgccctcctg  | gtagcacaat  |
| 33061 | gttcgtgcag  | ttgtgtgtca  | actacttttg  | tggcaccgtt  | tgttattcaa  | tctttatgct  |
| 33121 | agttttacta  | aaaattatac  | tatttttagat | ataattacaa  | tatctaagtt  | taaggtatag  |
| 33181 | agatgaatcc  | tacaatcaag  | agaattttca  | atatttttct  | tatagtatta  | tttatttctt  |
| 33241 | tttctcatgt  | tgggagtgct  | gccgctgaca  | ctaatactga  | tacaactgct  | caagtaatat  |
| 33301 | gtaacattat  | tggctacgtt  | tggggaatag  | gcggaccgct  | tatgaccgta  | gtgataatag  |
| 33361 | gtgcagcttt  | gcttgcgata  | tttggtagaa  | tgccatggcc  | agctcttttt  | gcactcggta  |
| 33421 | tattttgtgc  | tgtatttttc  | ggtgctaaaa  | ctatcgtcac  | aaaagtaatg  | ggtggtatag  |
| 33481 | gcggcactgg  | aaatacttct  | ttgatggacc  | aatgcggaac  | aggagacaca  | aaaaagaact  |
| 33541 | atttttttct  | aaaacagacc  | tgatgcacgg  | cttcaactat  | atcttccact  | tgcggtaatg  |
| 33601 | cttttttttc  | tagatttgca  | gcgtaaggta  | aggggatgtc  | cttgccaggt  | acacgtacaa  |
| 33661 | ctggagcatc  | aaggtagtca  | aatccttggt  | ccataataac  | ggctgacagc  | tctgctccta  |
| 33721 | ttcctgcaaa  | tggccatcct  | tcttctacac  | taactaacct  | attagtcttc  | tgaatagagt  |
| 33781 | taataacagt  | ttgagtgtca  | agtggctctta | aggttctgag  | gtcaataact  | tcagcttcta  |
| 33841 | taccttccact | cgaaagtaaa  | tctgctgcat  | ttaaggcatc  | cattaatttt  | aatgaaaaag  |
| 33901 | cagtgatagt  | tacatccttt  | ccttcccgtta | taacagcagc  | tttgcctatc  | tcaagtagat  |
| 33961 | aatcttttgt  | tgatagctca  | gagtcagaaa  | cttcatgctc  | atgtccataa  | gctatttcgt  |
| 34021 | tttctagaaa  | tattaccgga  | ttagggtcac  | gaattgcagc  | tttaagcaga  | cctctgcaat  |
| 34081 | ctgaggcaaa  | ataggggtgct | attactttta  | accccgggtat | atgcgaatac  | caagctgcaa  |
| 34141 | agcattgaga  | atgttggtgca | gcaactcttg  | ctgcagcgcc  | atgttggtcca | cgaaatacta  |
| 34201 | tagggcatcc  | aagttgtccg  | cctgacatat  | aatttggttt  | tgctgcggaa  | ttcacaattt  |
| 34261 | ggtcaatagc  | ttgcatagaa  | aaattaaaaag | tcataaaactc | gactattggc  | tttaatccag  |
| 34321 | caaatgccgc  | tccaacagca  | aggccagcaa  | atccatgttc  | ggtaataggc  | gtatcaacta  |
| 34381 | ctctgttttc  | tccaaactct  | ttcagtaatc  | ctttcggttac | tttataagca  | ccatcatact  |
| 34441 | ctgcaacttc  | ttcacccatg  | ataagcacat  | cagagtcggt  | ttgcatttct  | tctctaattg  |
| 34501 | ctgtgcataa  | agcttctctt  | acacttaagg  | ttgccattta  | taaactttta  | tagactttta  |
| 34561 | ctaaagtaac  | tatatcagaa  | ttactggggg  | taagtaaagt  | gtacaaatta  | agttttacaa  |
| 34621 | acatcatgac  | caactcattc  | caaaaaaaaaa | tcttctcacg  | cttgctgggt  | ttggttgcta  |
| 34681 | aaaatgattg  | tattgcttgt  | gttttttaata | atatatactg  | ctaagttaat  | aataattcac  |
| 34741 | ttgggaataa  | cagaaaaata  | catgataatt  | ttataattca  | aatagaataa  | aatccttttt  |
| 34801 | attgatactg  | tctttttttg  | taaaaaacat  | tcctaacttt  | tccaccactt  | tttctggcta  |
| 34861 | aggtcagtat  | aacttttgct  | tgaataaact  | gttttatatg  | tgcaattttac | agcttttagt  |
| 34921 | tgctaaaatt  | ataactctta  | atttaataat  | tttaaatccaa | taagctttca  | ggttaataaa  |
| 34981 | attaaattat  | ttgagtaaat  | gcaataccat  | gtcttttatt  | gtgggtaata  | ataagaataa  |
| 35041 | cgaagggttg  | ctcagctaca  | cttctataat  | ttcaattttt  | atgtttaccg  | tataaaaagaa |

|       |             |             |             |             |             |             |
|-------|-------------|-------------|-------------|-------------|-------------|-------------|
| 35101 | gtttcttcta  | tctgtgtctt  | cgcgtttgaa  | actaacttta  | ttctatctct  | ttcttgttct  |
| 35161 | ggacttaacc  | tgtgaagcgc  | gtaactgaaa  | tcttcctcac  | tcactataag  | ccgtctttgc  |
| 35221 | gcaccagcgc  | taatTTTTgc  | ttcattcact  | aattgctcta  | actcagcccc  | agaatagcct  |
| 35281 | tcagtcttgt  | ctgcaatgtc  | ttggaggctt  | agcttttcat  | cagtttttgt  | acctcgcata  |
| 35341 | taaagtgcc   | atatcttttg  | tctcacctct  | atgtttggat  | tagggacata  | aaccttctga  |
| 35401 | cctaaacgtc  | caggtcta    | aagtgtgga   | tctataccac  | cgataagggt  | agttgcacca  |
| 35461 | attactatta  | tatcttttct  | gctcttaaat  | ccatctat    | cagttaacaa  | ctgtgttaaa  |
| 35521 | ctctctcgac  | aatggtaagc  | tgagttatta  | gcggtacttc  | ttttttgagc  | aactgcatct  |
| 35581 | atctcatcta  | taaagactat  | acaaggagaa  | tatttttttg  | ctatttttaa  | aagctcgctg  |
| 35641 | acagcatgtg  | caccatgacc  | aatatatact  | ccaataagtt  | caggacctga  | gatgcttatg  |
| 35701 | aaattcatat  | ttgattcacc  | tgcaattgca  | cgagcgataa  | gtgttttacc  | atctccagga  |
| 35761 | gggccatata  | atatgtaacc  | tcttagtgaa  | ttaatacttt  | tatttccaaa  | cagcttgctg  |
| 35821 | atctcttctg  | tcatttggtc  | acagcaa     | atctgcaacc  | gttgttttta  | ggagtcata   |
| 35881 | attatagcat  | cagcaa      | tattctttta  | tcatctgaat  | tagctaattc  | tatcgatata  |
| 35941 | ggcagctcta  | cttcttttag  | tttgctgaat  | acttgatcat  | atacaacca   | aacaataaaa  |
| 36001 | aggggaacga  | caagtaacac  | acaaggcata  | gcttcactaa  | cataatgtgc  | agctaactca  |
| 36061 | taccctttac  | taagcaacat  | tgtatgcata  | taggcaaaca  | aaaaagcgat  | agagacaata  |
| 36121 | gttgccacgc  | atagtaaaca  | gattgaaatt  | cttttttagta | attctgaaat  | ttcaattttt  |
| 36181 | ttcatcttaa  | taccttatac  | caatttttaa  | ctaagaataa  | ttttatctag  | cttacctatt  |
| 36241 | ttagcttgat  | tagagcgttc  | agaaaaatta  | tcaagtacgt  | actttaattt  | attaaatact  |
| 36301 | aaaaacaata  | tatcaccata  | ttgtcacata  | catctttaa   | gtttaccaa   | ttcattttca  |
| 36361 | aaaaacaaga  | ttttattatt  | aaccagaatt  | ctggattaga  | tttaggttaa  | attattgaaa  |
| 36421 | gtcttgaatt  | ttactaaatt  | agtaactagt  | cttaaaatgc  | ttactgcttt  | atcgtaa     |
| 36481 | ctaaaacaat  | aagctattga  | tattcttggt  | ttttttaatc  | tccaatccag  | aattcggtt   |
| 36541 | aaaaacgcta  | acttgatatct | tcaagaagta  | agacataata  | gctctaaaat  | gtcttgcaag  |
| 36601 | gaaaggtaaa  | gctgaacgct  | aacttatgcc  | agaaaaatac  | cgcttggtt   | gcctttttga  |
| 36661 | gtagtatcat  | cttatttttc  | ctgtaaattt  | tgtttataac  | gcctaagatt  | tacgatattt  |
| 36721 | taatcccggg  | agaatatctt  | ataaaatcag  | attatatggt  | atacctatgg  | aaatagataa  |
| 36781 | ctttcagcaa  | tattacaacc  | aagaagaaat  | gaagacagta  | acattagctc  | aaatttataa  |
| 36841 | agacttggt   | ataaagatat  | tcgatatagc  | cacaagcaaa  | atgtaagcta  | ctattaatgg  |
| 36901 | tattatggaa  | atagcaccaa  | cgataccacc  | tactatacct  | actaccagag  | gtgacggagt  |
| 36961 | agtaaggctt  | aatataataa  | gtgggagaga  | tataattgat  | agtattatat  | aaattacacc  |
| 37021 | tactgttttc  | agaagagata  | gaaatccttt  | tgaatctaag  | tgttcttttt  | cccttaaata  |
| 37081 | atataaagaa  | aatgcttata  | cacattatag  | cacaaagtat  | tactgctgct  | atttttatta  |
| 37141 | tagctgctgc  | tataagtgtc  | gctaaataag  | ctatatcat   | tgcaattatc  | acacaccata  |
| 37201 | ataaaaaagt  | caactccata  | tgtttaggtt  | gtaaaatccc  | aaaaagcagc  | cagaatagaa  |
| 37261 | taagcaaaca  | tttacgaatt  | gaatttagtg  | caaacaaggg  | tgttgatatc  | aaccatactc  |
| 37321 | tgcaaatcg   | caatatggta  | tgactacatg  | ctttttattg  | atgtgattaa  | cataatcagc  |
| 37381 | agagagtttt  | gttttgcaaa  | agatgtctac  | agtaacatac  | tgcaattatt  | tggaattgta  |
| 37441 | gggctaggtg  | caattgtaag  | gccacttggt  | gcattcatat  | ttgggtcacgt | tggtgacagg  |
| 37501 | tatggaagga  | gtatagcatt  | aataattact  | atcttgctaa  | tatcgatacc  | atcaagtctc  |
| 37561 | attgcattta  | ttccaagtca  | caatcaagta  | ggtataaatt  | ctactatatt  | gcttcttgca  |
| 37621 | atccatataa  | cacaaggaat  | tgcaattggt  | ggtgaacaag  | gaagttctgt  | ttatcttata  |
| 37681 | gagcatttat  | ccagtaggaa  | agagaactta  | gggatgtatt  | ttggaatgat  | gggttttggg  |
| 37741 | cgctccattg  | gcgtcttgct  | ttctgcggtg  | atagtgatta  | tctgcaaaaa  | aactactgat  |
| 37801 | ttttgtacct  | tggttggtgag | attgccattt  | atcttctcag  | ctatttttagg | attaattagc  |
| 37861 | gcgtatagca  | tatacacatt  | gggagaaact  | ccagcatatg  | aaaaaaatcg  | aaaacaaga   |
| 37921 | aatttacctg  | atgtgccaat  | aatagagctt  | ataaaacgcc  | acaagagagc  | tcttataactt |
| 37981 | gctatttttaa | tatctgtacc  | tggttaatgtt | gctgttggt   | ttaccatatt  | tcttcgaact  |
| 38041 | ctcgcaaagg  | aaatagcatc  | agtggatgtt  | tatgtaacaa  | catatatcaa  | cgaaattgta  |
| 38101 | ttgattataa  | ccagtgtatt  | aatgccgata  | tcttcaatag  | cgtttggaat  | gttggtgat   |
| 38161 | aaagtgtgaa  | aagagcgcac  | tgcaatctta  | tttatagcaa  | ttacaatggc  | actgtgttgt  |
| 38221 | cctgcgttat  | ctattgcata  | ttactataaa  | aattatcttg  | tgattgcgtt  | gagcgtaatg  |
| 38281 | gttctctcta  | taatagaaa   | gggtatagtt  | cccataggaa  | tagttgcac   | tgaactcttt  |
| 38341 | cctaccaatg  | ttagatttag  | tggtgtgagc  | ttatcacgca  | atatctctta  | tgcgttacat  |
| 38401 | ggaggattta  | ctcctatggt  | ttgtatttgg  | ttgactgtaa  | catttcctca  | aacaaacctt  |
| 38461 | gctgctgggc  | tttatatagt  | cttctgcttg  | ttgatcagtg  | tggtagcaat  | attgcaaata  |
| 38521 | aaaccgcaag  | ataagaaatt  | tgattggtct  | tagttttctc  | ctatgtgatt  | tgatagaccg  |
| 38581 | ggaaagggtt  | tcatctaagt  | agctgacacc  | ctgacaaccg  | tcatcccgct  | gcttggttagc |
| 38641 | gggatctaga  | gataccgtga  | cggatgtacg  | taggactgct  | gtcattccag  | tctggaatcc  |

|       |             |             |             |             |             |            |
|-------|-------------|-------------|-------------|-------------|-------------|------------|
| 38701 | agagaaaagg  | atgatgtcat  | cccagtgctc  | ctgtaatgtc  | attccagtg   | ttgacactgg |
| 38761 | aatccagcct  | ttattatgca  | gccacttggt  | taaaattaag  | tcttctggat  | cccagtgctc |
| 38821 | gggcactggg  | atgacaaagg  | agggcagtg   | cagctactcg  | gatgacaccc  | tgctggtgga |
| 38881 | caatgtttgt  | atagttgtgc  | gtcacgcgct  | ggaatgacga  | attacttaac  | cgccataccg |
| 38941 | tcacgggtatc | tcctagcata  | gatcccgtca  | acacgtagcg  | ggatgacgat  | tttgatcggg |
| 39001 | aaaacaagta  | gcatgacgat  | ttatcaaagt  | ttccttagtt  | tctcaaaaaa  | atcctttaac |
| 39061 | aaaaaagagc  | attctgtttc  | taatatccca  | ccataaactt  | caggtatatg  | gctgcaaaat |
| 39121 | tgaaatatct  | tagcaccatt  | ttcaattcct  | ccaccttttg  | gattataagc  | tccaaagtac |
| 39181 | aatcgtttaa  | ttctggcaaa  | ggaaatggct  | tgagcacaca  | tcggacatgg  | ttctaagtgt |
| 39241 | acgtacatat  | cagcatcaca  | aagcgtggga  | gttgaaaatg  | cttgtctgat  | cgctaacatc |
| 39301 | tctgcatgtg  | cagttggatc  | gctggatata  | ttgtgtgcag  | aagaaatgat  | attgtctcca |
| 39361 | ctcactatta  | cagcacctat  | gggcacctca  | tcatTTTTTT  | gagcgagttt  | ggcttgctct |
| 39421 | atggcaagct  | ccatatattg  | atacttaaac  | actaggcact  | tatttcttat  | caattgctgc |
| 39481 | tttaacgaac  | gacacgaaaa  | gaggatgagg  | agaaaacggc  | tttgattgaa  | attctggatg |
| 39541 | aaactgcaca  | ccaataaacc  | acggatgact  | ctctaactcc  | actgcctcta  | tgcacgttcc |
| 39601 | atcttctgat  | atgccactgc  | ataacagccc  | atTTTTTTct  | aagtcactct  | tataatctga |
| 39661 | attgattatg  | tacctatgcc  | tgtgtctttc  | tgaaaatagta | gtgttactat  | atgcatccat |
| 39721 | catttttagag | tttgcattta  | tattacattt  | gtatgcccc   | agtctcatgg  | ttccaccaag |
| 39781 | atcgtcatct  | tgatcgccag  | ctaacttaac  | gattggatgt  | ttacagttac  | gaaattcttc |
| 39841 | agagtgtgaa  | tcttcaagct  | taacaacatt  | acgagcaaat  | tcaataattg  | caagctgcat |
| 39901 | accaaggcaa  | attccgaaaa  | atgggatatt  | atTTgtacgg  | gcataattta  | ttgctaatat |
| 39961 | tttaccctct  | actccgtcat  | caccaaacc   | ccctggaaca  | aggattgcat  | gagaattctg |
| 40021 | taacttctcc  | cctataagct  | tttcatttat  | aggTTTTTct  | tccttctctc  | ttgagttaac |
| 40081 | ccaatttatc  | tttactttga  | ctttattact  | aatcgcacca  | tgattttaatg | cttcaaccag |
| 40141 | tgatttgtat  | gcatcaggga  | attcggtgta  | ttttccctact | atagatacag  | taacttcctg |
| 40201 | tgttgggtgc  | cttatggaat  | gcactatttg  | atccccattca | gtcaagcttg  | gttttggctt |
| 40261 | acttaaata   | aagtgtctca  | aaatttgctg  | atcaagccca  | cattggctat  | acaacaccgg |
| 40321 | taactcatat  | atatgactca  | catcaggggc  | aggatatcaca | ttggataaag  | aaacattgca |
| 40381 | aagcttagct  | atTTtctctc  | tttgattatc  | gaaaatttct  | ttctcactgc  | ggcataatat |
| 40441 | aatatctggt  | tgtaaccccg  | cggaatttaa  | ctctcgaact  | gaatgctgcg  | ttggttttgt |
| 40501 | ctttaattct  | tgcgctgcgg  | taagatatgg  | tattaaagt   | aagtgaatca  | ggataactct |
| 40561 | ttgttttctc  | aatgtgtagt  | taacttggcg  | tatagcctcc  | aaaaatgggt  | ggctttcaat |
| 40621 | gtcacctaca  | gttccgccta  | tttcacatat  | tacaaaatct  | aaaccttccg  | taccattaaa |
| 40681 | aatgaacgat  | ttgatcaa    | ctgttacatg  | aggaaatgact | tgcacagttt  | tgccagata  |
| 40741 | atcaccacgc  | ctctctttct  | tcaataactc  | atgatataatc | ttaccagttg  | ttatatgtc  |
| 40801 | atcttttgtt  | gctttaattc  | cagtaaaacg  | ctcataatgc  | ccaagatcca  | aatcagtttc |
| 40861 | agcaccatct  | tcggtaacaa  | atacctctcc  | gtgctgagtt  | gggttcattg  | tcccaggatc |
| 40921 | aatgttgaga  | tacgggtcaa  | gttttctgat  | acggatctta  | aaaccgtgag  | cttgaagaag |
| 40981 | cgcaccaaca  | ctcgaagcaa  | ctaagccttt  | accaagcgat  | gacacaactc  | cacctgtgac |
| 41041 | aaagataaat  | ttagcttcct  | tcattaattt  | tcaaatggaa  | cagaagtaga  | ttcactttct |
| 41101 | tgcttttttt  | ctaataataat | tttttctgcg  | atcgattttt  | tatgtacgtc  | ttttgaacat |
| 41161 | aatcctgaca  | atagcaatgt  | gtttataata  | aacaatccag  | caacaatagc  | cgttattctg |
| 41221 | ctgagcgggt  | tttcagaaga  | tttcaccgga  | atcatcgaat  | tgacccccctg | ttgtgtatta |
| 41281 | ctaaaaccac  | ttaacgaact  | acttccaggc  | ggctgcaaga  | gcactaaaaat | tactaacaca |
| 41341 | acaaccaata  | ttatttgaaa  | tatacttaat  | accgctactg  | acattataga  | tagggctgaa |
| 41401 | aataaaaaatt | ttagcagtac  | aaagcacgta  | agtcaagaac  | atctgtcacc  | caataaactt |
| 41461 | gaaatctaag  | tatgtattta  | ctgcttacct  | tatttttgatt | aacatatgca  | taaaactttg |
| 41521 | ggcttaatat  | gtatcacatt  | ttaaaataca  | aaaattatga  | acaaaaaata  | gacgaaagt  |
| 41581 | ctttcatcgc  | aggtgggtcg  | catatcatag  | gcaaggttga  | aataggaaga  | gatgcaagca |
| 41641 | tctggtttta  | ttgtgtaatc  | agaggggacg  | ttggatcaat  | aaaaatagg   | aatggaacaa |
| 41701 | atattcaaga  | tggaaacggt  | attcatgtgg  | atagaaaacc  | aggtgggtgac | acaattattg |
| 41761 | gcagcatggt  | aacagtggtg  | cattttttgtg | tgttgcacgc  | atgcacgggtg | catgataagg |
| 41821 | cgtttattgg  | tatgggctct  | accgtgatgg  | accatgcagt  | tgtggagcct  | gaagctatgg |
| 41881 | tagctgctgg  | ctcactggta  | acacacggaa  | aagtgataaa  | aagtggggaa  | atatgggctg |
| 41941 | gcaggccagc  | aaaattcttc  | aaaaaaatgt  | cgaatgaaga  | aattaaacat  | attacacaat |
| 42001 | cagcacaaaa  | ttatatattg  | ctaataaatg  | aatataaaaa  | ctgaagctcg  | cgtcaagtgt |
| 42061 | tttacttgac  | acgtacattt  | cggcttaacc  | cttgttactt  | ctttttccca  | ttctcattta |
| 42121 | cttcttgtgc  | ttttgcccc   | tctacttgag  | tactaggtaa  | tactgcata   | gtaataccac |
| 42181 | cggctacgag  | tgcagatgct  | actgctatac  | caatcattac  | taacatctct  | aacttaactg |
| 42241 | tacgttcaag  | tgcagtaaat  | gctatcagtc  | cagcagcaag  | accataacca  | acagtagcag |

|       |             |             |             |             |             |             |
|-------|-------------|-------------|-------------|-------------|-------------|-------------|
| 42301 | tgtaccgtgc  | tccattgcct  | tgtttttagtt | gttgaatfff  | tttgttttca  | gcttctaatt  |
| 42361 | ctttatffff  | cttcttttagc | ttgtcaactt  | ctttctcttt  | agctgttaag  | tctgccttca  |
| 42421 | gtttgtcaac  | ttcagcatff  | ggctgtttgt  | gttttagttg  | tgctatffct  | ttctctffat  |
| 42481 | ctgctaattg  | ttgctgtaag  | tccgcaactt  | cttgtgtatt  | ttgttgagct  | tttaatgctg  |
| 42541 | ttatffctct  | gtcttttagct | tgtaactgtt  | gctgtaagtc  | cgcaactffct | tgtgtatfff  |
| 42601 | gttgagctff  | taatgctatt  | atffctctgt  | ctttagcttg  | taactgtttgc | tgtaagtcgg  |
| 42661 | caactffcttg | tgtatffttgt | tgagctffta  | atgctgttat  | ttctctgtct  | ttctctffta  |
| 42721 | actgctgctt  | actccgttgt  | attctffttac | ttgttgatct  | ttffctfftt  | cctffttfftg |
| 42781 | acttagtaac  | acctffcttg  | ccattaacag  | aaccttcact  | taatgtcgtg  | ctatcactag  |
| 42841 | aaacaacact  | tcgattacct  | ttattgccc   | acgtaacctc  | attatcatcg  | gcaacctgca  |
| 42901 | ttgtatcatt  | aatcccttca  | gacacaggcg  | tgctactcgc  | atcaacataa  | tcatttaaa   |
| 42961 | actcttgatt  | accaactaaa  | gaaccttgta  | acgactgctc  | tgffctctgat | tcaatagagt  |
| 43021 | ttffatffat  | agffctctct  | tgatcagatg  | ttatatcagt  | tggtgaagtt  | gctccagggtg |
| 43081 | aaagatfftg  | atfftaatta  | tgcataffta  | acctcaatat  | atataatftaa | cattacataa  |
| 43141 | tacctttaga  | acctaaagtc  | aagtaatatt  | tttatcatag  | catagaaaat  | ttatgttcgt  |
| 43201 | aaacaaaaaa  | ttffggcgta  | aaattgccgt  | atffacttaa  | ttgtgctata  | gctaaagtaa  |
| 43261 | tttaggtffta | ccgaccatcg  | tcattccgct  | gcttgtttagc | gggatctaga  | gataccgcgg  |
| 43321 | cggtatgacg  | ttgctagctt  | aaagtttaaa  | attgagaaat  | atffatgtta  | aaagaaaaat  |
| 43381 | acggctfftaa | agaagttgaa  | gacaaatgca  | acataattatg | ggaaggtagt  | aaagtttata  |
| 43441 | aatggaatgg  | tgaaaaggat  | aacactffca  | ctatagacac  | gcctccaccg  | acaatatcag  |
| 43501 | gaaaactcca  | tatcggccat  | atatttagct  | attgccacac  | ggactfftat  | gcaaggfftc  |
| 43561 | agcgcatgct  | gggaaaagat  | gtgtffttacc | caattgggtt  | tgatgataat  | gggcttccca  |
| 43621 | ctgaaagatt  | ggttgagcaa  | acctataaaa  | cccgcgcaaa  | agaagttggc  | agggaaaaat  |
| 43681 | ttatagagat  | gtgccatgag  | gttattgaaa  | aatcaaagca  | agaattcaag  | gaactatffa  |
| 43741 | aatcggtcgg  | cattagttat  | gactgggatt  | tggaatacca  | cacgatcagc  | aaggaaactg  |
| 43801 | tgacgctffct | acagatgtcg  | tttattgatc  | tatataataa  | gggatatgca  | tatagaaaaa  |
| 43861 | tgacgcccatt | cctffgggac  | ccggttgata  | aaacagcaat  | tgcacaaagca | gaaatagaag  |
| 43921 | ataaagttff  | tgagtcatcc  | ttaaacacga  | tagttffctc  | tactcaagaa  | aatgagcaga  |
| 43981 | tcaatattgc  | aactacgcgg  | cctgagttac  | ttcccgcattg | tgttgcagtt  | ttffgtcatc  |
| 44041 | cagaggatgc  | gcgctacacc  | catctgatcg  | gaaaaacagc  | cgtgggtgccg | atcacagaga  |
| 44101 | caaaagttcc  | aataatagct  | gatgataagg  | ttaaaataga  | taaaggcact  | gggcttgfta  |
| 44161 | tgtgtttgtac | attcggtgat  | gagctcgaca  | tatattggca  | gcaaaagcat  | aatctgccga  |
| 44221 | tgaaaatttat | catcgatcag  | gatgggagga  | tgaaccttca  | tgatgtcatt  | ccaccacacc  |
| 44281 | ccggcgctcat | tccagcgcg   | gacgctggaa  | tctatgaaat  | aaatggacta  | aaaattgtag  |
| 44341 | cagcaagaaa  | gaggatgatc  | gaaatcctaa  | ctgaaaaaagg | actffttggta | gaaagcacta  |
| 44401 | acattffctca | ttctgtttaag | tgcgcagaaa  | gatctggtgc  | accacttgag  | atattgccta  |
| 44461 | cttatcaatg  | gtffatcaag  | actfftagagc | aaaaagctca  | agtattagat  | aaagtaaaag  |
| 44521 | aatgcaattg  | gcatccagct  | actatgcgta  | aacgtatgga  | agtgtggata  | gaagggctaa  |
| 44581 | attgggactg  | gtgcatctca  | aggcaacgff  | atffttggtgt | gccatffcca  | gcgtggtatt  |
| 44641 | ccaaccgtaa  | gggagaagaa  | ggtaaaatta  | ttctagctga  | gataaaggac  | ctgcctatag  |
| 44701 | atccattgaa  | agatttgcca  | aaagggtata  | gcaaaagaaga | ggttatccca  | gatcaagatg  |
| 44761 | taatggatac  | ctggggccaca | agctcaatta  | ctcctcaact  | aagtgcacta  | gcagtaaaaca |
| 44821 | gtgagtttag  | cttaccaaaat | catcgctatg  | atacgatatt  | tcctgcagat  | ctgcgcagcc  |
| 44881 | agagccatga  | gataataaga  | acttgggctt  | tttatactat  | tttaaaggca  | cattatcatg  |
| 44941 | caaattctff  | accttggaaa  | aacattatga  | tcagcggttg  | gtgtfftagca | gatgataaga  |
| 45001 | aaaagatgag  | taaatacaaag | ggtaacatca  | ttactcctca  | tgtaataact  | gaaacttatg  |
| 45061 | gagctgatgt  | agtgcgctat  | tgggcagcga  | actcaaggct  | tggagttgat  | acagtctact  |
| 45121 | ctgaaaatat  | attcaaaaatt | ggcaagcgcc  | tcgttacaaa  | actfftggaac | gctagcaagt  |
| 45181 | ttgtffccat  | gttcatggaa  | aagcatcaaa  | cagtaagcat  | aaattccatc  | agtgagacga  |
| 45241 | tggataaatg  | gatactgtct  | aagctgtaca  | aagtaatagg  | taaagcaacg  | aataacctat  |
| 45301 | tacagtttga  | atactgcgaa  | gctffggggc  | cagtagaaga  | atffttfftg  | aaggatfftt  |
| 45361 | gtgataacta  | cttggaatta  | gtaaaaaaac  | gcgcgtacgg  | aagcagtga   | gcaaccttaa  |
| 45421 | gtgcaaagca  | aagtttgga   | tatgtactga  | atattatff   | gcggttatff  | gcacctffct  |
| 45481 | tgctttacat  | tacagaagag  | gtataccacc  | agttgtatag  | ttataattct  | gtacacaatc  |
| 45541 | aaagtaattg  | gccgagcaaa  | gaagaactta  | tctacgataa  | atattcagag  | gaaatgggag  |
| 45601 | ataatgttat  | tcagatatta  | aacattatca  | gaaagataaa  | ggcagataat  | aatgtatcag  |
| 45661 | ttaagcatct  | gataaaaaag  | ttgatgataa  | aagcgagcgt  | acaagaggat  | aagtttagatc |
| 45721 | aatctgcaca  | ggatgatffg  | caggcagtg   | gcaatgcaga  | aatgatagag  | tggatgcagt  |
| 45781 | ctgagcttga  | aactgaagac  | ggaaaataca  | tagtgaatat  | agactttatac | tgatffttat  |
| 45841 | agctffactt  | cctfftaatat | ccatgctatt  | gtaatcatta  | ttagtatgag  | ggaataatga  |

45901 gggatttgta tagtaaaacc aatgcaccat atcttatagc tgggtgctctt gctactttgg  
 45961 tattgcttgc gtctgggaca cttgctgttg ccccttatgt taagttcttg tcttcagttg  
 46021 cagcctttaa tgtagctctt

//

LOCUS JAQZAU010000105 607 bp dna linear ENV 17-MAR-2023  
 DEFINITION MAG: Wolbachia pipientis isolate wEsol contig\_51942, whole genome  
 shotgun sequence.  
 ACCESSION JAQZAU010000105 JAQZAU010000000  
 VERSION JAQZAU010000105.1  
 DBLINK BioProject: PRJNA929258  
 BioSample: SAMN33142973  
 KEYWORDS WGS; ENV; Metagenome Assembled Genome; MAG.  
 SOURCE Wolbachia pipientis (insect metagenome)  
 ORGANISM Wolbachia pipientis  
 Bacteria; Pseudomonadota; Alphaproteobacteria; Rickettsiales;  
 Anaplasmataceae; Wolbachieae; Wolbachia.  
 REFERENCE 1 (bases 1 to 607)  
 AUTHORS Fiutek,N., Couger,B.M., Roy,S., de la Torre,J.R. and Connor,E.F.  
 TITLE Genomic assessment of the contribution of the Wolbachia  
 endosymbiont of Eurosta solidaginis to gall-induction  
 JOURNAL International Journal Molecular Sciences  
 REFERENCE 2 (bases 1 to 607)  
 AUTHORS Fiutek,N., Couger,B.M., Roy,S., de la Torre,J.R. and Connor,E.F.  
 TITLE Direct Submission  
 JOURNAL Submitted (10-FEB-2023) Biology, San Francisco State University,  
 1600 Holloway Ave, San Francisco, CA 94132, USA  
 COMMENT ##Genome-Assembly-Data-START##  
 Assembly Date :: JUN-2019  
 Assembly Method :: FLYE v. 06-2019  
 Genome Representation :: Full  
 Expected Final Version :: Yes  
 Genome Coverage :: 100.0x  
 Sequencing Technology :: Illumina HiSeq; PacBio Sequel  
 ##Genome-Assembly-Data-END##  
 FEATURES Location/Qualifiers  
 source 1..607  
 /organism="Wolbachia pipientis"  
 /mol\_type="genomic DNA"  
 /submitter\_seqid="contig\_51942"  
 /isolate="wEsol"  
 /isolation\_source="galls on Solidago altissima"  
 /host="Eurosta solidaginis MN-2018-EFC"  
 /db\_xref="taxon:955"  
 /environmental\_sample  
 /country="USA: Cowling Arboretum, Carleton College,  
 Northfield, MN"  
 /lat\_lon="44.48 N 93.13 W"  
 /altitude="280 m"  
 /collection\_date="2018-11"  
 /metagenome\_source="insect metagenome"  
 /note="metagenomic"  
 gene <1..161  
 /locus\_tag="wEsol\_01232"  
 CDS <1..161  
 /locus\_tag="wEsol\_01232"  
 /codon\_start=1  
 /transl\_table=11  
 /product="hypothetical protein"  
 /translation="SRYQTRVVDIVKITEDAVTNIPDPDDQALLDSYERNKSHFYYPG  
 YRTAQYFP"

```

/besthit="qcoverage 96.1538461538462 , hcoverage
18.1159420289855 , similarity 96.0 , identity 96.0 ,
evaluate 2.52e-23 , alnlength 50 , Eukaryota , Arthropoda ,
GFR21324.1 ppiC domain-containing protein [Trichonephila
clavata]"
gene 410..>607
/locus_tag="wEsol_01233"
CDS 410..>607
/locus_tag="wEsol_01233"
/codon_start=1
/transl_table=11
/product="hypothetical protein"
/pfam="Rotamase Rotamase_2 Rotamase_3"
/translation="MGEKVFALKVGEVSEVLASSFGWHIIKVESAHQISDEDLVDLKK
DIKSVLTNQKSFERNDFINQV"
/besthit="qcoverage 100 , hcoverage 11.4186851211073 ,
similarity 98.5 , identity 98.5 , evaluate 1.14e-31 ,
alnlength 66 , Bacteria , Proteobacteria , EAL58705.1
peptidyl-prolyl cis-trans isomerase D, putative [Wolbachia
endosymbiont of Drosophila ananassae]"

```

#### ORIGIN

```

1 aaagtcgata ccaaactaga gtggttgata ttgttaaaat aactgaagat gcagttacaa
61 acattcctga accagatgat caagcattac ttgattcgtg cgaaagaaat aaatcccatt
121 tttattatcc tgggtatcga actgcgcaat attttcccta ggccaaaagt attttgaaga
181 tcaaatacaag atctcagatg aagaagttga tgggtataata gaacaacagg aactaaaaga
241 tcaaagagat gtattcaatg taatatTTTA taccaaagaa gaagctgaga cagcaagaag
301 agcatttgag gagggtaaaa caagctttga acagatagaa ggagagtttg gcaaagcaaa
361 acttgaggaa actagagtaa atataactaa ggatttttta ccagaagacg tgggggaaaa
421 ggtatttgct cttaaagtag gtgaagtaag tgaagtttta gcaagcagtt ttggttgga
481 tataataaaa gtggaaagtg cgcatacaat ctctgatgaa gacttagttg atttaaaaaa
541 agacataaag tcagttctaa ctaacaaaaa gtcttttgaa agagtcaatg atttcataaa
601 ccaagtg

```

//

```

LOCUS      JAQZAU010000106                4657 bp    dna        linear    ENV 17-MAR-2023
DEFINITION MAG: Wolbachia pipientis isolate wEsol contig_52887, whole genome
            shotgun sequence.
ACCESSION  JAQZAU010000106  JAQZAU010000000
VERSION    JAQZAU010000106.1
DBLINK     BioProject: PRJNA929258
            BioSample: SAMN33142973
KEYWORDS   WGS; ENV; Metagenome Assembled Genome; MAG.
SOURCE     Wolbachia pipientis (insect metagenome)
ORGANISM   Wolbachia pipientis
            Bacteria; Pseudomonadota; Alphaproteobacteria; Rickettsiales;
            Anaplasmataceae; Wolbachieae; Wolbachia.
REFERENCE  1  (bases 1 to 4657)
AUTHORS    Fiutek,N., Couger,B.M., Roy,S., de la Torre,J.R. and Connor,E.F.
TITLE      Genomic assessment of the contribution of the Wolbachia
            endosymbiont of Eurosta solidaginis to gall-induction
JOURNAL    International Journal Molecular Sciences
REFERENCE  2  (bases 1 to 4657)
AUTHORS    Fiutek,N., Couger,B.M., Roy,S., de la Torre,J.R. and Connor,E.F.
TITLE      Direct Submission
JOURNAL    Submitted (10-FEB-2023) Biology, San Francisco State University,
            1600 Holloway Ave, San Francisco, CA 94132, USA
COMMENT    ##Genome-Assembly-Data-START##
            Assembly Date      :: JUN-2019
            Assembly Method     :: FLYE v. 06-2019
            Genome Representation :: Full
            Expected Final Version :: Yes

```

Genome Coverage :: 100.0x  
Sequencing Technology :: Illumina HiSeq; PacBio Sequel  
##Genome-Assembly-Data-END##

FEATURES

|        |                                                                                                                                                                                                                                                                                                                                                                                                                                                                                                                                                                                                                                                                                                                                                                                                                                 |
|--------|---------------------------------------------------------------------------------------------------------------------------------------------------------------------------------------------------------------------------------------------------------------------------------------------------------------------------------------------------------------------------------------------------------------------------------------------------------------------------------------------------------------------------------------------------------------------------------------------------------------------------------------------------------------------------------------------------------------------------------------------------------------------------------------------------------------------------------|
| source | 1..4657<br>/organism="Wolbachia pipientis"<br>/mol_type="genomic DNA"<br>/submitter_seqid="contig_52887"<br>/isolate="wEsol"<br>/isolation_source="galls on Solidago altissima"<br>/host="Eurosta solidaginis MN-2018-EFC"<br>/db_xref="taxon:955"<br>/environmental_sample<br>/country="USA: Cowling Arboretum, Carleton College,<br>Northfield, MN"<br>/lat_lon="44.48 N 93.13 W"<br>/altitude="280 m"<br>/collection_date="2018-11"<br>/metagenome_source="insect metagenome"<br>/note="metagenomic"                                                                                                                                                                                                                                                                                                                         |
| gene   | 144..404<br>/locus_tag="wEsol_01234"                                                                                                                                                                                                                                                                                                                                                                                                                                                                                                                                                                                                                                                                                                                                                                                            |
| CDS    | 144..404<br>/locus_tag="wEsol_01234"<br>/codon_start=1<br>/transl_table=11<br>/fullproduct="qcoverage 100 , hcoverage 100 , similarity<br>100 , identity 100 , evalue 3.75e-54 , alnlength 86 ,<br>Bacteria , Proteobacteria , WP_012673289.1 MULTISPECIES:<br>hypothetical protein [Wolbachia]"<br>/translation="MTEDDGVTGSNTKSFVPIESALKSMFKVEISLEDAGKIRKGQE<br>VVLNNLRNLKNHDICCTVVGSVPIAICSFIYGCVKPIRVFNI"<br>/product="hypothetical protein"<br>/besthit="qcoverage 100 , hcoverage 100 , similarity 100<br>, identity 100 , evalue 3.75e-54 , alnlength 86 ,<br>Bacteria , Proteobacteria , WP_012673289.1 MULTISPECIES:<br>hypothetical protein [Wolbachia]"                                                                                                                                                               |
| gene   | 417..689<br>/locus_tag="wEsol_01235"                                                                                                                                                                                                                                                                                                                                                                                                                                                                                                                                                                                                                                                                                                                                                                                            |
| CDS    | 417..689<br>/locus_tag="wEsol_01235"<br>/codon_start=1<br>/transl_table=11<br>/fullproduct="qcoverage 100 , hcoverage 100 , similarity<br>100 , identity 100 , evalue 1.05e-55 , alnlength 90 ,<br>Bacteria , Proteobacteria , WP_006279944.1 MULTISPECIES:<br>30S ribosomal protein S15 [Wolbachia]"<br>/cog="RpsO COG0184 89 Ribosomal protein S15P/S13E"<br>/pfam="Ribosomal_S15"<br>/tigr="TIGR00952 S15_bact 86 ribosomal protein S15"<br>/product="30S ribosomal<br>protein S15"<br>/translation="MSITSEKKKSLINIYAIKEDDTGSSFVQCAILTERISNLTEHFK<br>VHKHDHHSKRGLLILIGRRRKHLNLIKRFKGFNEAYQELIEKLGIRK"<br>/besthit="qcoverage 100 , hcoverage 100 , similarity 100<br>, identity 100 , evalue 1.05e-55 , alnlength 90 ,<br>Bacteria , Proteobacteria , WP_006279944.1 MULTISPECIES:<br>30S ribosomal protein S15 [Wolbachia]" |
| gene   | 704..2977<br>/locus_tag="wEsol_01236"                                                                                                                                                                                                                                                                                                                                                                                                                                                                                                                                                                                                                                                                                                                                                                                           |

CDS

704..2977  
/locus\_tag="wEsol\_01236"  
/codon\_start=1  
/transl\_table=11  
/fullproduct="qcoverage 100 , hcoverage 100 , similarity 100 , identity 100 , evaluate 0.0 , alnlength 757 , Bacteria , Proteobacteria , WP\_141457247.1 MULTISPECIES: polyribonucleotide nucleotidyltransferase [unclassified Wolbachia]"  
/cog="Pnp COG1185 692 Polyribonucleotide nucleotidyltransferase (polynucleotide phosphorylase)"  
/pfam="RNase\_PH RNase\_PH\_C Pfam-B\_11765 PNPase RNase\_PH RNase\_PH\_C KH\_2 KH\_1 KH\_3 S1"  
/tigr="TIGR03591 polynuc\_phos 689 polyribonucleotide nucleotidyltransferase"  
/product="polyribonucleotide nucleotidyltransferase"  
/translation="MFKI IKKSI EWGGRALSLETGKIARQAHGSVVVNYGDTSVLVTV VRKKKEESVD FLPLNVQFI AKSYAMGKIPGGFFKREGKPSDRETLSRVIDRSIRPLF PEGFHDEISVVCNLLTYDTVNPPEVPALIGAVAAL AISGVPFHFTIAGVMVGC DENNN YILNPSVQEMKASSLDLFLSGDENSILMVESEVKELSEENVFNAIKFGHEHLKPVIKL IKEFADTIGNKPESFAPIDASDITQELEKYGKDFEKAYSQTVKQERVQALEAIREN I L NTLKETGKDEKLITYAVKNFERSLVREIIRKKSVRIDGRKHDEIRQIEVEVDILSKTH GSALFTRGNTQALVV TALGTTQDEQIVDDIEGDRREHFMLHYNFPSFAVGETSAARAP GRREIGHGKLA WKAIHPVLPDKSEFPYTIRVVSEI IESDGSSSMATVCGTSLALMDTG VPIKAPVAGIAMGLIKDKDEYVILSDILGDEDYLGDMDFKVAGTSEGV TALQMDMKIS GISFEIVEKSLEQAKAGRLLILEKMNAVISEHSDDVKD HAPRMLSFYIDKDKISAAIG SKGKNIRSVCERSNAKIEIGDDGKVS VFATSGTEAEIAKSMIDSITELEQGSIVDVK VVRIEK SIVELEFLNGRKGKMHISEVANEHIDSIESVLKQDDTFKALVIDFEKGGCPK LSRRRVDQETGEFFEGELYNEERKDGPNDRDNYNNSFSRKPGGSHHKRPPRPSGFS NRNRPKFGNNDSSSGFY"  
/besthit="qcoverage 100 , hcoverage 100 , similarity 100 , identity 100 , evaluate 0.0 , alnlength 757 , Bacteria , Proteobacteria , WP\_141457247.1 MULTISPECIES: polyribonucleotide nucleotidyltransferase [unclassified Wolbachia]"

gene

3183..3611  
/locus\_tag="wEsol\_01237"

CDS

3183..3611  
/locus\_tag="wEsol\_01237"  
/codon\_start=1  
/transl\_table=11  
/pfam="Pfam-B\_3816 DUF972 Pfam-B\_4504 Pfam-B\_3314 DivIC HALZ Pfam-B\_1653 Pfam-B\_3883 Pfam-B\_17409"  
/fullproduct="qcoverage 100 , hcoverage 100 , similarity 99.3 , identity 98.6 , evaluate 6.00e-75 , alnlength 142 , Bacteria , Proteobacteria , QEF50519.1 putative transposase [Wolbachia endosymbiont of Drosophila ananassae]"  
/translation="MVN LLELCN LQQKIEKLKAEIENLKAENKALKIENAELKERLG LNSKNSSLPSSKELYKTKKDKPKSERNVGDQVGYKGNFHATMEADKVVKIELPNICEC GGELVICEKPYVHQVDLPEIRPYVVIGTWSLLEMQKKKK"  
/product="putative transposase"  
/besthit="qcoverage 100 , hcoverage 100 , similarity 99.3 , identity 98.6 , evaluate 6.00e-75 , alnlength 142 , Bacteria , Proteobacteria , QEF50519.1 putative transposase [Wolbachia endosymbiont of Drosophila ananassae]"

gene

3568..4545  
/locus\_tag="wEsol\_01238"

CDS 3568..4545  
 /locus\_tag="wEsol\_01238"  
 /codon\_start=1  
 /transl\_table=11  
 /pfam="DDE\_Tnp\_IS66"  
 /fullproduct="qcoverage 99.0769230769231 , hcoverage 99.0769230769231 , similarity 95.7 , identity 88.8 , evaluate 3.58e-212 , alnlength 322 , Bacteria , Proteobacteria , WP\_007548920.1 IS66-like element ISWen3 family transposase, partial [Wolbachia endosymbiont of Drosophila ananassae]"  
 /translation="MEHGRCWRCRKRKSSKLPEGVTPDTFGPRVKSIIAALSGFYKNS KREVASIINDIFNLNISVGSISNSEHRVALKCEKTYEQIEQIEISRSEVLHIDETSHYN KGKLGWCWMFASNTASFVKLTESRGMKVLQDSTFCNRNSLIVTDRIYSAYNYFNDKKRQ ICWAYLIRDFERLAHSWNIEVKILGCVVRDVTTELFALKKALLKNEIDILRFARRARK LRKRTRYLKEISRLPEAIGASRVAKNILKSERMMWKFLDDPENIPLTNNHAEQQIRH YVVYRKNSYFTQSKRGNAFLERIISLYLTWKQRLNPFQNLLSIISYTA"  
 /product="IS66-like element ISWen3 family transposase, partial"  
 /besthit="qcoverage 99.0769230769231 , hcoverage 99.0769230769231 , similarity 95.7 , identity 88.8 , evaluate 3.58e-212 , alnlength 322 , Bacteria , Proteobacteria , WP\_007548920.1 IS66-like element ISWen3 family transposase, partial [Wolbachia endosymbiont of Drosophila ananassae]"

# ORIGIN

```

1  aggggtgtcat cccagcgccc ctatgatgtc attcaagtag ctgacactgg ttcctttatg
61  atggtagcgc ccctatgatg tcattccagt gtccttttct cgtcatccca gtgtcagcta
121 cttggatgac agaggggggt gggatgacag aagatgatgg agtgacaggg agtaatacaa
181 aaagtttcgt catccccatt gaatcggctt taaaatcgat gttcaaagtt gaaatttccc
241 tagaagatgc ggggaaaatc agaaaaggtc aggaagttgt attaaataac ttgcgtaatt
301 taaagaatca tgatatttgt tgtacgggtg tgggtagtgt acctattgca atctgcagtt
361 ttatttatgg ttgtgtgaaa cctattcgtg tttttaatat ttaaaatgag gtttagatgt
421 cgataacatc cgaaaagaaa aagagtttga taaatatata tgcaattaaa gaagatgata
481 caggctcatc ttttgtacaa tgtgcaattt tgaccgagag gatcagtaac ttaactgagc
541 attttaaagt gcacaagcat gaccatcact ctaagcgtgg tttacttata ttgataggta
601 gaagacgcaa gcacttaaat tatataaagc gtaaattttg taatgaagcc tatcaggaat
661 taatagagaa gttaggcatt agaaaataat cgaggaaattt aatatgttta aaattataaa
721 aaaatctata gagtgggggtg gtcgtgcctt atcttttagaa acaggaaaaa tagcacgcca
781 agctcatggt tcagtagttg taaattacgg tgatacttct gttttagtaa ctggtgtacg
841 taaaaagaag gaagaaagcg ttgatttcct acctttaaat gtgcagttta tcgcaaaaag
901 ctatgccatg ggtaagatcc ctggcgggtt ttttaaaaga gaaggcaagc catctgatag
961 agaaacttta atctcaagag taatagatag aagtataaga ccactattcc cagaaggatt
1021 tcatgatgaa attagtgtgg tgtgcaatct attaaacttat gatacagtca atcctcctga
1081 agtgccagca ttgattggtg ctggtgcagc tcttgcaatt tctggtgttc cctttcactt
1141 tactatagct ggagtgatgg ttggttgtga tgaaaataat aactatatac tcaacccttc
1201 tgttcaagag atgaaagcaa gcagcttgga tctgtttttg tctggtgatg aaaattcaat
1261 tttaatggtt gaatcagaag tgaaagagct ctctgaagaa aatgttttta atgcaataaa
1321 atttgccat gaacacctta agcctgtcat taagctcata aaagagtttg ctgatacaat
1381 tggcaataaa cctgagagct ttgcccctat tgatgcatca gatataacac aagagctcga
1441 aaaatacgg aaagattttg aaaaagcata ttcgcaaaca gtaaaaacaag agcgagttca
1501 agctctagaa gcgatcaggg agaatatatt gaatactctt aaagaaactg gaaaagacga
1561 aaagttaatt acgtatgcag taaaaaattt tgaaagatct ttagtacgtg aaataattag
1621 gaagaaaagt gtaaggatag acggtcgtaa gcatgatgag atacgtcaga tagaagttga
1681 agttgatatt ctgtccaaaa ctcacggttc tgcactattt acaagaggca atactcaggc
1741 actggttgtt actgctcttg gcaccactca agatgagcaa attgtggatg atattgaagg
1801 ggatagacgt gagcatttca tgttgcatta taactttccc tcatttgctg ttggagaaac
1861 ttctgctgcg cgtgcaccag gaagaagaga aatcggtcat ggcaaacttg cttggaaagc
1921 aattcatcct gttttacccg ataagtctga atttccttat acaataagag tagtgtccga
1981 aattttggag tctgatggtt cttcttctat ggcaacagtt tgtgggactt ctcttgcttt

```

```

2041 aatggatagc ggtgtgccaa taaaggcccc tgttgctgga attgctatgg gtctcatcaa
2101 agataaagac gagtatgtaa tactttccga tatacttggt gatgaagatt atcttggtga
2161 tatggacttt aaagtagcag gaactagtga aggggttacg gcgctacaaa tggacatgaa
2221 aatttctggt ataagctttg aaattgttga aaaatcttta gaacaggcaa aagctggaag
2281 attacttatt ttagaaaaaa tgaatgcagt gatttcagaa cacagtgatg atgtcaaaga
2341 ccatgcacca aggatgttat cttttacat agataaagac aaaatttctg ctgctatagg
2401 ttctaagggg aaaaatatac gcagtgtgtg tgaaagaagt aatgcaaaaa ttgaaatagg
2461 agatgatggg aaagtttctg tttttgctac gagtggcact gaagctgaaa ttgcaaagag
2521 tatgatgatt gattcaataa cagaactaga acaagggttct atagttgatg tcaaggttgt
2581 aagaatagag aagtctattg tagagcttga atttcttaat ggcagaaaaa gaaaaatgca
2641 cataagtga gtagctaata aacatataga ttctatagag agcgtactta aacaagatga
2701 tactttcaaa gcactagtaa ttgacttcga aaaagggtggg tgtccaaagt tgtcaagacg
2761 tcgggttgat caagagacgg gagagttttt tgaagggtgag ctttacaacg aggaaaggaa
2821 agatgggtcca aatgacaggg ataattatta caataattca tttagtagaa aacctggagg
2881 aagtcaccat aagaggcctc ctcgtcctcg ttctggtttc agcaacagaa ataggccgaa
2941 atttggtaat aatgattcat catcaggttt ttattaagag taaacttctt gcgttacctc
3001 tcgtcattcc agtgcttaat actggaatga caccctttct ggtgaagggtt gttctcaaat
3061 cacaatgtta gtacaattgt ggtgttagct atagctaacc caaggatatc gttcagcgga
3121 gtggtagaat aaggtagaca aagtgatcta aaaagataat catagagcaa aagtgaggtg
3181 atgtggtaaa ctttttagaa ctttgcaaaa atttacagca aaaaatagaa aaactgaaag
3241 cagagataga aaacttaaaa gcagaaaata aagcttttaa gatagagaa gctgaattaa
3301 aggaaaggct tggtttaaac tcgaaaaatt catctctacc gagctctaaa gaattgtaca
3361 aaacaaaaaa ggacaagcca aaaagcgaaa ggaatgttgg cgatcagggtt ggggtataaag
3421 gaaattttca tgccacaatg gaagcggata aagtagtaaa aatagagttg cctaataattt
3481 gcgaatgcgg aggagagctt gtaatatgag aaaaaccta tgttcaccaa aaagttgatc
3541 ttccggaaat taggccttat gtagtaattg gaacatgggtc gttgttggag atgcagaaaa
3601 agaaaaagta gcaagttacc agaagggtgt acgccagata catttggtcc aagggttaag
3661 tctataattg cagcactcag cggattttac aaaaactcaa agcgtgaagt ggctagtatc
3721 ataaatgaca tttttaattt gaacataagt gttggcagca tatcaaatag tgaacacaga
3781 gttgcattaa aatgcgaaaa aacatatgag caaatcgaac aagaaataag cagaagttag
3841 gttttgcata tcgatgaaac cagtcactat aacaaaggaa aacttggctg gtgttggatg
3901 tttgcaagca atacggcaag ttttgtaaaa ttgacagaat caagaggaat gaagggtttg
3961 caagacagca ctttttgcaa tcgcaatagt ttgatagtaa ctgatagata ttcagcctac
4021 aactacttta atgataagaa aaggcaaata tgctgggctt atttaataag agattttgaa
4081 aggctggctc atagctggaa cattgaagtt aagattcttg gctgttatgt aagagatgtc
4141 actactgaat tatttgcact aaaaaaagct ttactaaaaa atgagataga cattttaaga
4201 tttgccagac gtgcaagaaa attgcgaaaa cgtacaagggt attatttgaa ggaaatatct
4261 cgcttacctg aagcaattgg agcttctcga gttgcaaaga atattttgaa atctgaaaga
4321 atgatgtgga aatttttaga tgaccagaa aatattccgc tgacaaataa ccatgctgaa
4381 cagcaaatc ggcatatgt cgtttatcgc aaaaattcat attttaccba atcgaagcgg
4441 ggaaatgcat tccttgaacg gataatttca ttatacttga catggaaaca aagggtctc
4501 aatcctttcc aaaacctctt atctatcatc tcttacaccg cttagctgaa cggatacacg
4561 tgaatgttgc aattacaaaa gcgatctcta ctaggaggat gtcatttcag tgcccctgtg
4621 atgtcattcc agtgtctcct tttttgtcat cccagtg

```

//

```

LOCUS      JAQZAU010000107                8641 bp    dna        linear    ENV 17-MAR-2023
DEFINITION MAG: Wolbachia pipientis isolate wEsol contig_52895, whole genome
            shotgun sequence.
ACCESSION  JAQZAU010000107 JAQZAU010000000
VERSION    JAQZAU010000107.1
DBLINK     BioProject: PRJNA929258
            BioSample: SAMN33142973
KEYWORDS   WGS; ENV; Metagenome Assembled Genome; MAG.
SOURCE     Wolbachia pipientis (insect metagenome)
ORGANISM   Wolbachia pipientis
            Bacteria; Pseudomonadota; Alphaproteobacteria; Rickettsiales;
            Anaplasmataceae; Wolbachieae; Wolbachia.
REFERENCE  1 (bases 1 to 8641)
AUTHORS    Fiutek,N., Couger,B.M., Roy,S., de la Torre,J.R. and Connor,E.F.
TITLE      Genomic assessment of the contribution of the Wolbachia

```

endosymbiont of *Eurosta solidaginis* to gall-induction  
 JOURNAL International Journal Molecular Sciences  
 REFERENCE 2 (bases 1 to 8641)  
 AUTHORS Fiutek,N., Couger,B.M., Roy,S., de la Torre,J.R. and Connor,E.F.  
 TITLE Direct Submission  
 JOURNAL Submitted (10-FEB-2023) Biology, San Francisco State University,  
 1600 Holloway Ave, San Francisco, CA 94132, USA  
 COMMENT ##Genome-Assembly-Data-START##  
 Assembly Date :: JUN-2019  
 Assembly Method :: FLYE v. 06-2019  
 Genome Representation :: Full  
 Expected Final Version :: Yes  
 Genome Coverage :: 100.0x  
 Sequencing Technology :: Illumina HiSeq; PacBio Sequel  
 ##Genome-Assembly-Data-END##  
 FEATURES Location/Qualifiers  
 source 1..8641  
 /organism="Wolbachia pipientis"  
 /mol\_type="genomic DNA"  
 /submitter\_seqid="contig\_52895"  
 /isolate="wEsol"  
 /isolation\_source="galls on Solidago altissima"  
 /host="Eurosta solidaginis MN-2018-EFC"  
 /db\_xref="taxon:955"  
 /environmental\_sample  
 /country="USA: Cowling Arboretum, Carleton College,  
 Northfield, MN"  
 /lat\_lon="44.48 N 93.13 W"  
 /altitude="280 m"  
 /collection\_date="2018-11"  
 /metagenome\_source="insect metagenome"  
 /note="metagenomic"  
 gene complement(10..279)  
 /locus\_tag="wEsol\_01239"  
 CDS complement(10..279)  
 /locus\_tag="wEsol\_01239"  
 /codon\_start=1  
 /transl\_table=11  
 /fullproduct="qcoverage 100 , hcoverage 100 , similarity  
 100 , identity 100 , evalue 2.67e-62 , alnlength 89 ,  
 Bacteria , Proteobacteria , WP\_007552972.1 MULTISPECIES:  
 IS110 family transposase [Wolbachia]"  
 /cog="COG3547 COG3547 303 Transposase and inactivated  
 derivatives"  
 /pfam="DEDD\_Tnp\_IS110"  
 /product="IS110 family  
 transposase"  
 /translation="MQVNAILGVDISKKKFDVCLLVDSKKRHKVFQNNQDGF AKLVVW  
 CNGHGANLTHLCLEATSWYGEDLATFMHDLGHNVSIVNPESFWQK"  
 /besthit="qcoverage 100 , hcoverage 100 , similarity 100  
 , identity 100 , evalue 2.67e-62 , alnlength 89 ,  
 Bacteria , Proteobacteria , WP\_007552972.1 MULTISPECIES:  
 IS110 family transposase [Wolbachia]"  
 gene complement(600..1052)  
 /locus\_tag="wEsol\_01240"  
 CDS complement(600..1052)  
 /locus\_tag="wEsol\_01240"  
 /codon\_start=1  
 /transl\_table=11  
 /fullproduct="qcoverage 100 , hcoverage 100 , similarity

```

100 , identity 100 , evalue 2.34e-94 , alnlength 150 ,
Bacteria , Proteobacteria , WP_015589289.1 MULTISPECIES:
hypothetical protein [Wolbachia]"
/translation="MSKEYDETKVKPAMSTPQGPEGTNGSKAQSVLSNKRKPTINFDD
KKYGVKTSKIDQQSLNKRQESSKLRDLLRSIPIIRRFLARIFTPEKIEIISNPIYDNM
EAYKKSQEDYPSKIKDETSIDDEHTKEVDSKLEKGNVEQVDNKKSRSS"
/product="hypothetical protein"
/besthit="qcoverage 100 , hcoverage 100 , similarity 100
, identity 100 , evalue 2.34e-94 , alnlength 150 ,
Bacteria , Proteobacteria , WP_015589289.1 MULTISPECIES:
hypothetical protein [Wolbachia]"
gene 1193..2227
/locus_tag="wEsol_01241"
CDS 1193..2227
/locus_tag="wEsol_01241"
/codon_start=1
/transl_table=11
/fullproduct="qcoverage 100 , hcoverage 100 , similarity
100 , identity 100 , evalue 3.11e-243 , alnlength 344 ,
Bacteria , Proteobacteria , WP_010962945.1 MULTISPECIES:
aspartate-semialdehyde dehydrogenase [Wolbachia]"
/cog="Asd COG0136 334 Aspartate-semialdehyde
dehydrogenase"
/pfam="Semialdehyde_dh DapB_N Semialdehyde_dhC DUF2738
Gp_dh_C"
/tigr="TIGR01296 asd_B 339 aspartate-semialdehyde
dehydrogenase"
/product="
aspartate-semialdehyde dehydrogenase"
/translation="MRYKIAVIGATGRVGREVLSTLAEFQDEAIDCVIALASKKSEGG
KVSFGDKELTVLCLEDYDFVGTNVAIFCAGSHVSEEVPIATQAGCIVIDNSSHFRMK
EGVPLIIPKINKEKIMEYKKNHNIISNPNCCTTIQMLLVLLHLLHQAKIKRIVASTYQST
SGAGKAAMDELYDQTKKIFMNEAKKPKIFSKQIAFNICIPHVGFEFMENGSTEEWKMQE
ETKKILEEDIKVTATCVRVPVFIGHAMAVNVEFDQHITEEQAREVLSEAEDSGVLVYN
RREDSEYITQIDVVQENAVYVSRIRRDNTVEHGLNMWIVADNLRKGAALNIVQILEIL
IREHLSIKCI"
/besthit="qcoverage 100 , hcoverage 100 , similarity 100
, identity 100 , evalue 3.11e-243 , alnlength 344 ,
Bacteria , Proteobacteria , WP_010962945.1 MULTISPECIES:
aspartate-semialdehyde dehydrogenase [Wolbachia]"
gene complement(3041..3535)
/locus_tag="wEsol_01242"
CDS complement(3041..3535)
/locus_tag="wEsol_01242"
/codon_start=1
/transl_table=11
/fullproduct="qcoverage 100 , hcoverage 100 , similarity
100 , identity 100 , evalue 1.27e-116 , alnlength 164 ,
Bacteria , Proteobacteria , WP_012673308.1 MULTISPECIES:
Smr/MutS family protein [Wolbachia]"
/cog="COG2840 COG2840 184 Uncharacterized protein
conserved in bacteria"
/pfam="Pfam-B_5428 Smr"
/product="Smr/MutS family
protein"
/translation="MSDDELDWQKNVKPIKCGKVTLKVDHKVNIKSMVDKGTSDLQGN
FLNTNNGNSSFCLDQNTKSKVDRGKYFISDKLDLHGYNIEDAYCKLIDFIIKNYRAGN
RCLLVITGYGSATNKTDTIKNNLNKWLNDTKIQHMLVLYQQATKKHGGKGAFYVLLRR
LRSY"
/besthit="qcoverage 100 , hcoverage 100 , similarity 100

```

```

, identity 100 , evalue 1.27e-116 , alnlength 164 ,
Bacteria , Proteobacteria , WP_012673308.1 MULTISPECIES:
Smr/MutS family protein [Wolbachia]"
gene 3628..4392
/locus_tag="wEsol_01243"
CDS 3628..4392
/locus_tag="wEsol_01243"
/codon_start=1
/transl_table=11
/fullproduct="qcoverage 100 , hcoverage 100 , similarity
100 , identity 100 , evalue 8.06e-178 , alnlength 254 ,
Bacteria , Proteobacteria , WP_015589288.1 MULTISPECIES:
23S rRNA (guanosine(2251)-2'-O)-methyltransferase RlmB
[unclassified Wolbachia]"
/cog="SpoU COG0566 260 rRNA methylases"
/pfam="SpoU_sub_bind SpoU_methylase"
/tigr="TIGR00186 rRNA_methyl_3 240 RNA methyltransferase,
TrmH family, group 3"
/product="23S rRNA
(guanosine(2251)-2'-O)-methyltransferase RlmB"
/translation="MKSSKTNENFWLYGKHTCMSALKNKNRRCIELLVTFNFYREHEK
EIKQCANSKGIKVRLVENKILNDVLPKGANHQGIALKVAPILHNLSIEEVAESSNDSS
TIVILDQVTDTHNIGSILRTSACFNVNALVLPNHSPSENASIAKAASGALDIVPLIY
VTNIVKTMEYLKKVGYWCYGFDCNAKENIDEIKSFEKKRVIIIFGSEEKGVRRLLVKENC
DYLLKIPISNVIDSLNVSNAAGLYSIYIKTNASA"
/besthit="qcoverage 100 , hcoverage 100 , similarity 100
, identity 100 , evalue 8.06e-178 , alnlength 254 ,
Bacteria , Proteobacteria , WP_015589288.1 MULTISPECIES:
23S rRNA (guanosine(2251)-2'-O)-methyltransferase RlmB
[unclassified Wolbachia]"
gene 4472..5194
/locus_tag="wEsol_01244"
CDS 4472..5194
/locus_tag="wEsol_01244"
/codon_start=1
/transl_table=11
/fullproduct="qcoverage 100 , hcoverage 100 , similarity
100 , identity 100 , evalue 1.17e-154 , alnlength 240 ,
Bacteria , Proteobacteria , WP_015589287.1 MULTISPECIES:
Bax inhibitor-1/YccA family protein [unclassified
Wolbachia]"
/cog="COG0670 COG0670 233 Integral membrane protein,
interacts with FtsH"
/pfam="Bax1-I"
/product="Bax
inhibitor-1/YccA family protein"
/translation="MSYMRNEQDIRSQGAYYSAGLRSYLTQVYNYMALALGVTGLVAF
LTVFSGLEFQVIHSNPVLSLVVMLSPVALVFYMSYRIQHLSAQSAVTIFFSFSVLMGLS
LSYIFIVYTAENIARAFFITSIMFGSMALYGNTTKRDLTSMGSFLIMGIWGLIIASIV
NLFLGSSPLYFAISFISVIVFTLMTAYDAQRIKDVYKHNKGSEVATTKLAILGATNL
YDFDFINIFLNLLRLLNLFNNRD"
/besthit="qcoverage 100 , hcoverage 100 , similarity 100
, identity 100 , evalue 1.17e-154 , alnlength 240 ,
Bacteria , Proteobacteria , WP_015589287.1 MULTISPECIES:
Bax inhibitor-1/YccA family protein [unclassified
Wolbachia]"
gene 5195..5728
/locus_tag="wEsol_01245"
CDS 5195..5728
/locus_tag="wEsol_01245"

```

```

/codon_start=1
/transl_table=11
/fullproduct="qcoverage 99.4350282485876 , hcoverage
98.876404494382 , similarity 100 , identity 100 , evaluate
1.34e-120 , alnlength 176 , Bacteria , Proteobacteria ,
WP_015589286.1 MULTISPECIES: cytochrome c oxidase
assembly protein [unclassified Wolbachia]"
/cog="COX11 COG3175 195 Cytochrome oxidase assembly
factor"
/pfam="CtaG_Cox11"
/product="cytochrome c
oxidase assembly protein"
/translation="MFSFLRKGSKNSIVFFLISLVVLMCLAYASVPLYSIFCKATGY
GGTIRKVTNTTNTNITNQKIRVHFNADIMSDLPWEFKSETNYVDVNIGEQLAFYYAKN
LSDQPSFGMAVYNVTPFKAGKYFNKVACFCFEEQMLLAKQKAAMPVVSFYIDPEIMLDS
NTKDLSEITLSYTFKA"
/besthit="qcoverage 99.4350282485876 , hcoverage
98.876404494382 , similarity 100 , identity 100 , evaluate
1.34e-120 , alnlength 176 , Bacteria , Proteobacteria ,
WP_015589286.1 MULTISPECIES: cytochrome c oxidase
assembly protein [unclassified Wolbachia]"
gene 6789..7766
/locus_tag="wEsol_01246"
CDS 6789..7766
/locus_tag="wEsol_01246"
/codon_start=1
/transl_table=11
/fullproduct="qcoverage 100 , hcoverage 100 , similarity
100 , identity 100 , evaluate 2.72e-232 , alnlength 325 ,
Bacteria , Proteobacteria , WP_015589284.1 MULTISPECIES:
quinone oxidoreductase [unclassified Wolbachia]"
/cog="Qor COG0604 326 NADPH:quinone reductase and related
Zn-dependent oxidoreductases"
/pfam="ADH_N ADH_zinc_N ADH_zinc_N_2"
/tigr="TIGR02824 quinone_pig3 325 putative NAD(P)H
quinone oxidoreductase, PIG3 family"
/product="quinone
oxidoreductase"
/translation="MVRAIQIKKTGGPEVLEFVDKNIGEPKGEEVLVRHTTIGLNRYD
LEHRKGTRKIKNLPSVLGVEAVGVIEKLGKKISDGLKVGDRVGYCTAPPGAYCEKRII
HQKYLIKIPDDISDEVAAVLFGKMTAHLVNQSYKIRPGAFVLVHGANGGLGQIICQ
WAKDKKGVVIGSVSSDEKMKIALQSGCTYAINYNNDKDFVSKIMEITQNRGVGAVYDPI
GYATSKLSFESLGRFGIYVSYGQISGNAPISFSLSSRSLFATGTLIYHYKHDRFTLV
LTTMEIFEMIRKLLTVRINKKYKFDEIIQAHRDMENRKASGLNIIKIS"
/besthit="qcoverage 100 , hcoverage 100 , similarity 100
, identity 100 , evaluate 2.72e-232 , alnlength 325 ,
Bacteria , Proteobacteria , WP_015589284.1 MULTISPECIES:
quinone oxidoreductase [unclassified Wolbachia]"
gene complement(8115..>8641)
/locus_tag="wEsol_01247"
CDS complement(8115..>8641)
/locus_tag="wEsol_01247"
/codon_start=1
/transl_table=11
/pfam="DDE_Tnp_1 rve DDE_Tnp_1_2"
/fullproduct="qcoverage 100 , hcoverage 84.8780487804878
, similarity 100 , identity 100 , evaluate 9.96e-126 ,
alnlength 174 , Bacteria , Proteobacteria ,
WP_174517030.1 MULTISPECIES: transposase [unclassified
Wolbachia]"

```

```

/translation="YRGYEQTRKLHVMLNINNKKAIYKYSNGVYSDHYGACDLLKEV
DFQHAIKALYADRACDRHKFYKLCNEYDIKTKIPPINNAAEHPEIDYMSDRNAAIRLI
KLYGEDGMKEWKKEVNYGKRSYIEGFFSRLKQIFGFSFRNKSEINREKELLIKCYLLN
KFTDIGMAKFEIVT"
/product="transposase"
/besthit="qcoverage 100 , hcoverage 84.8780487804878 ,
similarity 100 , identity 100 , evaluate 9.96e-126 ,
alnlength 174 , Bacteria , Proteobacteria ,
WP_174517030.1 MULTISPECIES: transposase [unclassified
Wolbachia]"

```

# ORIGIN

```

1  ctgagcagct  cacttttgcc  aaaagctttc  tgggtttact  atactgacat  tatgtcctaa
61  atcgtgcata  aaagtagcca  aatcttctcc  ataccaacta  gttgcttcaa  gacataaatg
121 agtaagattt  gctccatggc  cattgcacca  aactacaagt  tttgcaaaac  catcttgatt
181 attttgaaag  actttgtgtc  gttttttact  gtccactaac  aaacaaacat  caaatctctt
241 ttttgaaata  tccacaccca  aaatagcatt  tacttgcata  aaattgcctc  caagactata
301 aataaactga  gagtttagac  taaccttgta  atacgggata  taattccaaa  agatactgtt
361 cagtctttta  ctctatggga  gggaagcaaa  atctggctta  atggcattag  tgtcgcatac
421 gcttcaccct  ccctgtgagg  tatttttagc  ctaatgcctc  acatcataaa  gatacaagtg
481 tcacgcactg  ggatgacgag  aaaggagcac  tggaaatfff  gtttcaatat  ttgtacatga
541 gccatgcatc  tgaacagata  caatgttata  actagagata  attttttaat  gattgatatt
601 tatgaactac  gacttttctt  gttgtccact  tgttcaacat  tacccttctc  aagtttacta
661 tctacttctt  ttgtgtgttc  atcatctata  ctagtttcat  cttttatctt  actagggtaa
721 tcttcctgcg  attttttata  tgcttccatg  ttgtcatata  tagggttact  gatgatttct
781 attttttcag  gtgtgaaaat  ccttgctaaa  aatctcctta  ttattgggat  tgaccttaag
841 agatctctta  gctttgaaga  ttcttgtctt  ttgttttaga  actgttggtc  tatttttaga
901 gtttttacac  catacttttt  atcatcaaaa  ttattgttag  gctttctttt  atttgaaaga
961 acactttggg  cctttgatcc  attggttcct  tcaggccctt  gaggtgtaga  cattgcaggt
1021 ttaaccttag  tttcatcgta  ttccttactc  atctttcatt  tcattatgta  atattactaa
1081 tattgcataa  taatagctaa  attacaatta  attgcaaggt  aaaaatatta  aaacaattgt
1141 aaattttgtc  agtaaaaata  taatagaact  taaaatttag  aggttcatct  atatgagata
1201 caaaattgct  gttattggag  caaccggaag  agtagggcgt  gaggtattaa  gcacgcttgc
1261 tgaatttcaa  gatgaggcga  tagattgcgt  tattgcactt  gcatcgaaaa  aatcagaagg
1321 gaagaagggt  agctttggtg  acaaagagtt  aacagtttta  tgccttgagg  attatgactt
1381 cgttggaact  aatgtagcca  ttttctgtgc  tggatctcat  gtttctgaag  agtatgtacc
1441 aattgcaaca  caggctggat  gcacgtgat  agataacagt  tcccatttta  gaatgaaaga
1501 ggggtgtgca  ctcatattc  cagagattaa  taaagaaaaa  attatggaat  ataaaaacca
1561 caacataata  tccaatccaa  actgtactac  aatacagatg  ctgctagtac  tacatctatt
1621 acacaaaaaa  gcaaaaataa  agagaatcgt  tgcttcaact  tatcaatcaa  cttctggtgc
1681 aggcaaagca  gcaatggatg  agctctatga  ccagacaaaa  aaaatcttta  tgaacgaagc
1741 taaaaaaccc  aagatattct  ctaagcaaat  agcattcaat  tgcattcccc  atgtaggaga
1801 attcatggaa  aatggttcta  cagaagagga  atggaaaatg  caagaggaga  caaaaaaaat
1861 tttagaggaa  gatataaaaag  ttactgcaac  ttgtgtaagg  gtaccggtct  ttatcggtca
1921 cgctatggca  gtaaattgtg  aatttgatca  acatatcact  gaagaacaag  ctcgtgaagt
1981 gctaagttaa  gccgaagata  gtggagtfff  agtggtacaac  aggcgtgaag  atagtgaata
2041 cataactcaa  attgatgttg  tacaggagaa  tgctgtatat  gtatcgcgta  ttagaagaga
2101 caatactgtt  gagcacggat  taaatatgtg  gatagtggct  gacaacctgc  gcaaaggcgc
2161 agcattaaat  atagtgcaga  ttcttgagat  ttgataaga  gagcattttg  caatcaagtg
2221 catatagagc  gcacgtacgt  tgtaattcga  aggaaattgt  atatcacatg  gcacgcgtg
2281 acgctggaat  ggctttgttg  catcgctact  tatgaaaggc  taactataat  taggattata
2341 agcaacttat  tgaaaatctt  gttttttttg  caatcaatct  gatcaaat  aagaatagta
2401 acttgttatt  tatattaata  aatttaattc  tattgaaaat  agctaaagca  ttgaaattct
2461 tgaatttttag  cgggattagt  gagtggtagt  gaaatttctt  ttactcaaat  ttaggtattc
2521 actgaccgtt  cttgttataa  ataccagaat  aataagctac  tgatattctc  cacctttttt
2581 atctttaatc  catcatagct  agcgtatgca  caaagccggc  tggattccag  tgtcaagcac
2641 tggaatgaca  ccatttgctg  tgcagtttac  cttcaaaaat  gaatgttcgt  acagctatgg
2701 aataaatcgc  ggtatgacgg  ttcgcagcgg  tatagtaact  cgtcaccgcc  ctacttgtaa
2761 gcggctgaga  taccgcggcg  gtatgacgta  gaagctatac  ttttatactc  accaactcag
2821 tatccaatct  ggatccaagt  agtcaagcta  ttcggatgac  accctcataa  agtgaaatga
2881 gatcccgcta  acacgtagcg  ggatgacggg  aaaagaggta  ctgggagaca  tccttcctgg

```

|      |             |             |             |             |             |            |
|------|-------------|-------------|-------------|-------------|-------------|------------|
| 2941 | tagacccaaa  | tcacaatggt  | cgcacagttg  | tgcgtcacgc  | gctgccgaac  | actgtatggt |
| 3001 | tatacaagaa  | aaattaaggc  | ttaaaaggaa  | acttaagcag  | ctaataggac  | ctaagccttc |
| 3061 | ttaataaaac  | ataaaaagct  | cctttaccac  | catgtttttt  | cgtagcttgc  | tggtagtata |
| 3121 | gaaccatatg  | ctggatttta  | gtatcattta  | accacttatt  | taagttattc  | tttatagtgt |
| 3181 | ctgtttttatt | tgttgccactg | ccgtatcccg  | taattaccaa  | taaacatcta  | ttccctgctc |
| 3241 | gataatTTTT  | gataataaaa  | tctatcaatt  | tacagtaagc  | atcctctata  | ttatagccat |
| 3301 | gcaaatacgag | cttgctcgctt | ataaaatatt  | tacccttatc  | aacttttgat  | tttgtgtttt |
| 3361 | ggtcaagaca  | aaatgatgag  | ttaccattat  | tggtattaag  | aaaattccct  | tgtaagtcgg |
| 3421 | aggtaccttt  | atcaaccata  | gactttatat  | ttactttatg  | atcaactttc  | aaagtaactt |
| 3481 | ttccacattt  | tattggctta  | acattttttt  | gccaatccaa  | ctcatcgctc  | gacataaacg |
| 3541 | cattaatcga  | attgtataat  | tttacaacaa  | tattcaaaca  | tagtaaaaatg | ttgcttattc |
| 3601 | tataaaaacc  | agatttttcga | taatacgaatg | aaatcgtcaa  | aaactaatga  | gaatttttgg |
| 3661 | ctgtatggaa  | agcacacctg  | catgtcagca  | ctgaagaata  | aaaataggcg  | gtgtatagaa |
| 3721 | ctgttagtaa  | cagaaaattt  | ctatagagaa  | cacgaaaaag  | aaattaagca  | atgtgcaaat |
| 3781 | agtaagggca  | ttaaagtctg  | attagtagaa  | aacaaaatac  | ttaatgacgt  | tttaccctaa |
| 3841 | ggtgctaata  | atcaagggat  | tgcttttaaaa | gttgctccta  | tccttcataa  | cttaagcatc |
| 3901 | gaagaagtag  | ctgaaagctc  | aaacgacagc  | tctactatag  | tcatttttaga | tcaagtcact |
| 3961 | gacacgcaca  | atattgggtc  | aatttttaaga | acttcagctt  | gttttaaatgt | caatgcattg |
| 4021 | gttttaccac  | ataaccactc  | accgagtga   | aatgcaccta  | ttgcaaaagc  | agcaagtggg |
| 4081 | gcttttagata | tcgttccgct  | aataacgctt  | acaaatatag  | tgaaaactat  | ggagtattta |
| 4141 | aaaaaggtcg  | gctactggtg  | ttacgggttt  | gattgcaatg  | ctaaagaaaa  | tatagatgaa |
| 4201 | ataaagagct  | ttgaaaaaaa  | aagagtaatc  | atttttggct  | ctgaagagaa  | aggggtacga |
| 4261 | agactagtta  | aagaaaactg  | tgattatctt  | ttaaaaatcc  | caatatcaaa  | cgtaattgac |
| 4321 | agcttaaatg  | tttcaaatgc  | agcagcaata  | ggcctatat   | ctattttatat | taaaacaaat |
| 4381 | gccagcgcat  | agctgtttat  | aataaaaaaca | cttgataaaa  | atatgggttt  | atattataat |
| 4441 | gtgttaagta  | atggataaaa  | ggagtatat   | tatgtcttat  | atgagaaatg  | aacaggatat |
| 4501 | tcgctctcaa  | ggcgcttatt  | atagtgtctg  | gcttagaagt  | tacctaacta  | aagtatataa |
| 4561 | ttacatggct  | ttagcttttg  | gcgtcacagg  | gcttggtgca  | ttcctaacag  | tgttttctgg |
| 4621 | tctttttcag  | gtgattcatt  | ctaataccctg | cctatcgctt  | gtggtaaatg  | tatctccagt |
| 4681 | tgcatgtgtg  | ttctacatgt  | cttatagaat  | tcaacaccta  | agtgtcagct  | ctgccgttac |
| 4741 | tatatTTTTc  | tcgttctcag  | tggttaatggg | gcttttccta  | tcttatattt  | ttatagttta |
| 4801 | tactgcagaa  | aatatagcaa  | ggcggttttt  | cattacatca  | atcatgtttg  | gctctatggc |
| 4861 | tttatatggt  | aatactacaa  | aaagagatct  | tacaagtatg  | ggctctttct  | tgattatggg |
| 4921 | aatctggggg  | ttaatcattg  | cgtctatagt  | aaattttattc | cttggaagta  | gtcctctcta |
| 4981 | ctttgcaata  | tcgttttatat | cagtaatagt  | atttacccta  | atgactgcgt  | atgatgctca |
| 5041 | agaatcaag   | gacgttttatt | ataaacataa  | tgacggatca  | gaagttgcta  | ctactaaatt |
| 5101 | ggcaatactc  | ggtgcaacta  | atcttttattt | tgacttttatt | aatatatattc | tcaatctact |
| 5161 | caggttactt  | aacttggttca | acaataggga  | ttagatgttt  | tccttttttaa | ggaaaggcag |
| 5221 | taagaattct  | atagttttct  | ttctaataatc | tctagtgtga  | ttgatgttat  | gtcttgcata |
| 5281 | tgcatcggtg  | cctctatata  | gcattttttt  | taaagctact  | gggtatgggtg | gcacaataag |
| 5341 | aaaagtaact  | aacacaacaa  | caaataatac  | taaccaaaag  | atcagggtcc  | atttcaatgc |
| 5401 | tgatataatg  | tccgatctac  | cttgggagtt  | taaatcagaa  | actaactacg  | ttgacgtaaa |
| 5461 | cataggagaa  | caaagtttag  | cgttttatta  | cgcaaaaaat  | ctatctgac   | agccttcatt |
| 5521 | tggtatggcg  | gtgtataatg  | ttacgccttt  | caaagcaggt  | aagtatttca  | ataaagttgc |
| 5581 | atgcttttgt  | tttgaagagc  | aatgtttgct  | agcaaaaacaa | aaagcagcta  | tgcccgatc  |
| 5641 | tttctatata  | gaccttgaga  | taatgcttga  | tagtaatac   | aaagatttga  | gcgaaataac |
| 5701 | actatcatac  | acgtttttta  | aggcttaagt  | aataactttt  | tcatattgtc  | acccaagcag |
| 5761 | cgtgagctat  | agcctaaact  | gcctagattt  | acagacaatt  | tgaaaaactg  | tcattccgta |
| 5821 | ccgttagggc  | ggatctatgc  | ttgagatacc  | gcggcggtat  | gggacgtaat  | cgataagtaa |
| 5881 | acctcgtcat  | cccgtacttt  | gttaagcggg  | atctccgcgg  | cggtatgacg  | tggtagtata |
| 5941 | ggacgatagt  | gcgttggtat  | tcaaatcatg  | attatgcaac  | aagatctatt  | gaattgagca |
| 6001 | ggagtcttta  | ttgctttttg  | cgcaccgata  | ctgggtgtctc | agtgtgtgtg  | ttatcaattc |
| 6061 | catccttcat  | ttttgcttca  | caagccttcc  | aatatgcagc  | caattcttat  | tatttgtcac |
| 6121 | agaaattggc  | atttttcgca  | tgaggttttt  | ttccaatgta  | tgtaaattag  | aatcttacag |
| 6181 | caatctttgt  | tcaattgatt  | ctctgcctat  | ataattcagt  | aacacaagct  | aaagcgggta |
| 6241 | tttccaacgt  | agtgttaatg  | tgggcttatc  | actaccacgc  | ttctatgaga  | gcctttaaca |
| 6301 | cgtactggag  | aaacgagtc   | aagcgcaggc  | atgtaaatat  | cctttttaat  | tttgcacgtt |
| 6361 | tagttactgc  | tttattaaaa  | ttgcgctaga  | ttggtgaaa   | cgtgaggctt  | tgtattatta |
| 6421 | atagcaatag  | aaaaacgact  | attctaagga  | aagcatcata  | gtctttcaaa  | taactttgtg |
| 6481 | attaattatc  | aaaaaccttt  | ttttttccaa  | gaagcatata  | aatattcata  | aagttttctt |

```

6541 tgctgagttc ggcattccac ttctagcttt cttttatttt tttttattat atactatatc
6601 taaaccgtta tcttatccac ttgtacaaa cattatacaa aacatataaa gcaaatttct
6661 tatccatcat aagttatact taaaactatt aatatgcact tataagttag tatataaact
6721 ctaaaataac cattttgcaa aatataattg ttagataaca taatcaaagt ttttatctta
6781 cattcatcat ggtagagct atacaaatta aaaaaactgg gggaccagaa gtattagaat
6841 ttgtagataa gaatataggt gagccaaaag gcgaggaagt cttagtgcgt cacacaacta
6901 tcggcttaaa tcggtatgat ttagagcaca gaaaaggtac gcgcaaaatt aaaaatttac
6961 catcagtgtc tggggtagaa gcagtgggag ttattgaaaa gcttggttaa aaaatcagtg
7021 atgggttgaa ggtcggagat agagttggat attgcacagc tcctccaggg gcatattgtg
7081 aaaagcgcat tataaccag aaatatctga taaaaatccc agatgacata tctgatgaag
7141 ttgctgctgc agtgctgttt aaaggtatga cagctcacta tttagttaat caatcttata
7201 aaatcaggcc tgggtgcttt gtgctagttc atggagctaa tgggtggctta gggcaaataa
7261 tatgtcaatg ggcgaaggat aaaaaaggtg tagtgatagg ttctgtaagc tctgatgaaa
7321 aaatgaagat agctttacaa agtggctgca catacgcaat aaactacaat gataaagact
7381 tcgtttctaa aattatggag attacgcaaa acagaggagt aggtgcagta tatgacccca
7441 taggttacgc tacaagcaag ctctcttttg aatctttagg caggttcggc atatacgttt
7501 cctatgggca gatatcaggt aacgctccta ttagtttttc tttacttagt tcacgctcgt
7561 tatttgcaac tggaacctta atatatcatt ataagcatga tagattcaca ttagtgctta
7621 ccacaatgga aatcttcgag atgataagaa aaaaactttt aactgtacgg atcaataaaa
7681 aatataaatt tgatgaaata attcaagccc atcgcgatat ggaaaacaga aaagcaagtg
7741 ggtaaataat tatcaaaatc tcttaaataa actagtaatt taaactaacc attcattaaa
7801 tcatatcaac tagaacttca catatttaat tctccttttg agggaattaa aagcatatag
7861 ctaaaactgac ttaggcttac cgacaaccgt catcccgcga cgtgttagcg gaatctatac
7921 cgcgataga cttcttgcat aacccaaatt aagtagaaaa aggtatcatc cgagtagctg
7981 acactgggtc ctttatgacg gtagtagccc cccttctcct gtcattccag tgctctcttc
8041 ttgtcatccc agtgcccaga cactgggatg gctttgttgc atcacacttt atgagatggt
8101 gatttatggt aaattcatgt aactatctca aatttagcca taccaatatc agtgaattta
8161 ttaagcaaat agcatttgat tagcagttct ttttctcgat ttatctcaga tttattccta
8221 aaactaaatc cgaatatattg ctttaattct gagaaaaacc cttcaatata agatcttttc
8281 ccataattta cttctttttt ccattctttc atgccatctt caccgtataa ttttattaac
8341 ctaatagcag cattcctgtc agacatataa tctatttctg gatgttctgc cgcatgtttt
8401 attggtggaa tttttgtctt tatatcatat tcgttacaca acttataaaa cttgtgccta
8461 tcacatgctc tatctgcata tagtgctttt atggcatgct gaaaatcaac ttcttttagc
8521 aaatcacaag ctccatagtg atcagagtag acaccgttac tgtattttac agctatggct
8581 tttttgttgt ttatatcaaa cattacgtgc aattttctcg tttgctcata gccacgatat
8641 t

```

//

```

LOCUS      JAQZAU010000108      1834 bp      dna      linear      ENV 17-MAR-2023
DEFINITION MAG: Wolbachia pipientis isolate wEsol contig_53491, whole genome
            shotgun sequence.
ACCESSION  JAQZAU010000108 JAQZAU010000000
VERSION    JAQZAU010000108.1
DBLINK     BioProject: PRJNA929258
            BioSample: SAMN33142973
KEYWORDS   WGS; ENV; Metagenome Assembled Genome; MAG.
SOURCE     Wolbachia pipientis (insect metagenome)
ORGANISM   Wolbachia pipientis
            Bacteria; Pseudomonadota; Alphaproteobacteria; Rickettsiales;
            Anaplasmataceae; Wolbachieae; Wolbachia.
REFERENCE  1 (bases 1 to 1834)
AUTHORS    Fiutek,N., Couger,B.M., Roy,S., de la Torre,J.R. and Connor,E.F.
TITLE      Genomic assessment of the contribution of the Wolbachia
            endosymbiont of Eurosta solidaginis to gall-induction
JOURNAL    International Journal Molecular Sciences
REFERENCE  2 (bases 1 to 1834)
AUTHORS    Fiutek,N., Couger,B.M., Roy,S., de la Torre,J.R. and Connor,E.F.
TITLE      Direct Submission
JOURNAL    Submitted (10-FEB-2023) Biology, San Francisco State University,
            1600 Holloway Ave, San Francisco, CA 94132, USA
COMMENT    ##Genome-Assembly-Data-START##

```

Assembly Date :: JUN-2019  
 Assembly Method :: FLYE v. 06-2019  
 Genome Representation :: Full  
 Expected Final Version :: Yes  
 Genome Coverage :: 100.0x  
 Sequencing Technology :: Illumina HiSeq; PacBio Sequel  
 ##Genome-Assembly-Data-END##

|          |                                                                                                                                                                                                                                                                                                                                                                                                                                                                                                                                                                                                                                                                                                                                                                                                                                                                                                                                                                 |
|----------|-----------------------------------------------------------------------------------------------------------------------------------------------------------------------------------------------------------------------------------------------------------------------------------------------------------------------------------------------------------------------------------------------------------------------------------------------------------------------------------------------------------------------------------------------------------------------------------------------------------------------------------------------------------------------------------------------------------------------------------------------------------------------------------------------------------------------------------------------------------------------------------------------------------------------------------------------------------------|
| FEATURES | Location/Qualifiers                                                                                                                                                                                                                                                                                                                                                                                                                                                                                                                                                                                                                                                                                                                                                                                                                                                                                                                                             |
| source   | 1..1834<br>/organism="Wolbachia pipientis"<br>/mol_type="genomic DNA"<br>/submitter_seqid="contig_53491"<br>/isolate="wEsol"<br>/isolation_source="galls on Solidago altissima"<br>/host="Eurosta solidaginis MN-2018-EFC"<br>/db_xref="taxon:955"<br>/environmental_sample<br>/country="USA: Cowling Arboretum, Carleton College,<br>Northfield, MN"<br>/lat_lon="44.48 N 93.13 W"<br>/altitude="280 m"<br>/collection_date="2018-11"<br>/metagenome_source="insect metagenome"<br>/note="metagenomic"                                                                                                                                                                                                                                                                                                                                                                                                                                                         |
| gene     | complement(<1..490)                                                                                                                                                                                                                                                                                                                                                                                                                                                                                                                                                                                                                                                                                                                                                                                                                                                                                                                                             |
| CDS      | /locus_tag="wEsol_01248"<br>complement(<1..490)<br>/locus_tag="wEsol_01248"<br>/codon_start=1<br>/transl_table=11<br>/pfam="Pfam-B_11632 Pfam-B_8018"<br>/fullproduct="qcoverage 100 , hcoverage 95.3216374269006<br>, similarity 100 , identity 100 , evaluate 8.98e-107 ,<br>alnlength 163 , Bacteria , Proteobacteria , CDR78923.1<br>Putative site-specific recombinase [Wolbachia<br>endosymbiont of Drosophila simulans wAu]"<br>/translation="MIKKEYQRRVLENKNDESSEKKFARRENQIKEGIEKLMDYYSQ<br>ENAGEKGYISEEEFKQTMKMKERLQGIEEEKKKVVDQKAVEKGISLIINSIKNFYSS<br>VKSNLEQLDWQTKRGIKALIGQINIGCDQVEGVGFQIEEPAQDGGIILNLYHCTTHHNK<br>GVG"<br>/product="Putative site-specific recombinase"<br>/besthit="qcoverage 100 , hcoverage 95.3216374269006 ,<br>similarity 100 , identity 100 , evaluate 8.98e-107 ,<br>alnlength 163 , Bacteria , Proteobacteria , CDR78923.1<br>Putative site-specific recombinase [Wolbachia<br>endosymbiont of Drosophila simulans wAu]" |
| gene     | 603..956                                                                                                                                                                                                                                                                                                                                                                                                                                                                                                                                                                                                                                                                                                                                                                                                                                                                                                                                                        |
| CDS      | /locus_tag="wEsol_01249"<br>603..956<br>/locus_tag="wEsol_01249"<br>/codon_start=1<br>/transl_table=11<br>/fullproduct="qcoverage 100 , hcoverage 100 , similarity<br>99.1 , identity 99.1 , evaluate 2.33e-76 , alnlength 117 ,<br>Bacteria , Proteobacteria , WP_081420800.1 MULTISPECIES:<br>transposase [Wolbachia]"<br>/cog="COG2963 COG2963 116 Transposase and inactivated<br>derivatives"<br>/pfam="HTH_Tnp_1 HTH_23 HTH_28"<br>/product="transposase"                                                                                                                                                                                                                                                                                                                                                                                                                                                                                                  |

```

/translation="MVREYTAEFKLEAVKLANEQRKAGQTITKIAKDLGIKGGLLGKW
IKKHNEKKSAAADAFPGRGNMAPYDKERFDLQSKSNKGKRHLKKSPPGQSKRVKYFFIKE
HSNCYKVQELCRIFC"
/besthit="qcoverage 100 , hcoverage 100 , similarity 99.1
, identity 99.1 , evalue 2.33e-76 , alnlength 117 ,
Bacteria , Proteobacteria , WP_081420800.1 MULTISPECIES:
transposase [Wolbachia]"
gene 1135..1332
/locus_tag="wEsol_01250"
CDS 1135..1332
/locus_tag="wEsol_01250"
/codon_start=1
/transl_table=11
/fullproduct="qcoverage 100 , hcoverage 100 , similarity
100 , identity 100 , evalue 1.88e-40 , alnlength 65 ,
Bacteria , Proteobacteria , WP_010082070.1 hypothetical
protein [Wolbachia endosymbiont of Drosophila incompta]"
/translation="MQKNDIRAILRRKFIIKKQQTDNRAVAPNILDQNFIVDQPNKVV
DYLHQNQGGMAIFGSNNSHVW"
/product="hypothetical protein"
/besthit="qcoverage 100 , hcoverage 100 , similarity 100
, identity 100 , evalue 1.88e-40 , alnlength 65 ,
Bacteria , Proteobacteria , WP_010082070.1 hypothetical
protein [Wolbachia endosymbiont of Drosophila incompta]"
gene 1336..1497
/locus_tag="wEsol_01251"
CDS 1336..1497
/locus_tag="wEsol_01251"
/codon_start=1
/transl_table=11
/fullproduct="qcoverage 100 , hcoverage 100 , similarity
100 , identity 100 , evalue 5.54e-28 , alnlength 53 ,
Bacteria , Proteobacteria , WP_010082071.1 MULTISPECIES:
hypothetical protein [Wolbachia]"
/cog="Tra5 COG2801 232 Transposase and inactivated
derivatives"
/pfam="rve"
/product="hypothetical protein"
/translation="MSSAINKQLVMNSLLMAINRRKPVKNLLHSDQGSQYTAQGYQY
LLAVKNIDE"
/besthit="qcoverage 100 , hcoverage 100 , similarity 100
, identity 100 , evalue 5.54e-28 , alnlength 53 ,
Bacteria , Proteobacteria , WP_010082071.1 MULTISPECIES:
hypothetical protein [Wolbachia]"
gene 1490..1654
/locus_tag="wEsol_01252"
CDS 1490..1654
/locus_tag="wEsol_01252"
/codon_start=1
/transl_table=11
/fullproduct="qcoverage 100 , hcoverage 100 , similarity
100 , identity 100 , evalue 2.14e-30 , alnlength 54 ,
Bacteria , Proteobacteria , WP_010082072.1 MULTISPECIES:
IS3 family transposase [Wolbachia]"
/cog="Tra5 COG2801 232 Transposase and inactivated
derivatives"
/pfam="rve_3 rve_2"
/product="IS3 family
transposase"
/translation="MSNKGCCYDNSVAESFFSSLKREILIDTSQHSAAQQTRTAIFEYI

```

```

EIFYNKQRHY"
/besthit="qcoverage 100 , hcoverage 100 , similarity 100
, identity 100 , evalue 2.14e-30 , alnlength 54 ,
Bacteria , Proteobacteria , WP_010082072.1 MULTISPECIES:
IS3 family transposase [Wolbachia]"
gene complement(1683..>1834)
/locus_tag="wEsol_01253"
CDS complement(1683..>1834)
/locus_tag="wEsol_01253"
/codon_start=1
/transl_table=11
/product="hypothetical protein"
/translation="KLPFSTVFSMILKLVKKSLGIECELMEPLTCDLTQKKWRESLEC
FSQRE"
/besthit="qcoverage 100 , hcoverage 71.0144927536232 ,
similarity 100 , identity 100 , evalue 2.37e-26 ,
alnlength 49 , Bacteria , Proteobacteria , RLT61243.1
hypothetical protein WANA31_0857, partial [Wolbachia
endosymbiont of Drosophila ananassae]"

```

#### ORIGIN

```

1  cgccaacccc cttattatga tgtgtagtac aatgatacaa attaagaatt ccccatcct
61  gtgctggttc ttcgatctga aatcctactt ctacctgatc acaaccaatg ttaatttgtc
121 ctattaatgc ttaataatg ccgcgcttag ttgccaatc tagctgttcc aggttcgatt
181 ttacactaga ataaaaattc tttatgctat ttataataag acttattcct ttttctactg
241 ctttctgatc aactaccttt tttttctctt cttctatccc ttgtaagcgt tctttcattt
301 ttctcattgt ctgtttaaat tcttcctcgc ttatatatcc tttctctcct gcattttcct
361 gactataata atcttccatt aatttttcga taccttcttt tatttgattt tctcttcttg
421 caaacttttt ctctgatgat tcatcatttt tattttctaa tactctacgt tggatttcct
481 tttttatcat ctctggggtt tttagtacat ctttcacctt ttcccatact gaccttacct
541 agaaaaagtg gagagaaaga aaggagtttt ttcgggtaaa ataaaatttt ggaggattag
601 aaatggtaag agaataata gcagaattca aattggaagc tgtaaactg gcaaatgaac
661 aaagaaaggc aggtcaaaca attacaaaaa tagcaaagga tttaggaata aagggtggtt
721 tattaggaaa atggataaag aaacacaacg aaaaaaagtc ggcagcagat gcatttccag
781 gtagaggtaa catggctcct tacgacaaag agaggtttga ttacaaaagc aagagtaaca
841 agggaaagag acatttataaa aaaagccctg gccagtcaaa aagagtaaaa tattttttta
901 taaaagagca tagtaactgc tataaagtac aggaattatg taggattttc tgctagtggc
961 tactataagt ggaccacaag aaaaataagc agtagagaat cagcaaataa agagttatta
1021 gcagatattc aaaaaatata tcaagtttct aaatgtagat atggagctcc taaaattcat
1081 gctgaattga aggctttggg taaaagttgc aatttgaaaa cggtgcaaag tattatgcag
1141 aaaaatgaca tcagggtctat actgagaaga aagtttataaa ttaaaaaaca acaaacagat
1201 aatagagctg tagctcccaa tatactagat caaaacttta ttgttgatca accaaataaa
1261 gtatgggatt acttacatca aaaccaagga gggatggcta tatttggcag caataattct
1321 cacgtatggt agttaatgag tagtgcaata aataaacaat tggttatgaa ctctttatta
1381 atggccatta ataggcgtaa acctgttaaa aatctactgc tgcacagtga ccaaggttca
1441 caatatactg cgcaagggtg tcaatatctc ttagctgtaa agaataataga tgagtaataa
1501 aggctgttgt tacgacaatt ctgttgcaga aagcttcttt agctcattga aaagagaaat
1561 acttattgat acttcacaac actctgctca acaaactaga actgcaatat ttgaatacat
1621 agaaattttt tataacaaac aacgtcacta ttaactattg cattcctgag cattttgatt
1681 catcattctc tttgtgaaaa acattccaaa ctttctctcc actttttctg ggtaagggtca
1741 catgtcaatg gctccataag ttcacattct attcccaaac tttttttaac taactttaa
1801 atcatagaaa atactgtcga aaaaggaagt tttc

```

//

```

LOCUS      JAQZAU010000109      13798 bp      dna      linear      ENV 17-MAR-2023
DEFINITION MAG: Wolbachia pipientis isolate wEsol contig_53607, whole genome
            shotgun sequence.
ACCESSION  JAQZAU010000109  JAQZAU010000000
VERSION    JAQZAU010000109.1
DBLINK     BioProject: PRJNA929258
            BioSample: SAMN33142973
KEYWORDS   WGS; ENV; Metagenome Assembled Genome; MAG.

```

SOURCE Wolbachia pipientis (insect metagenome)

ORGANISM Wolbachia pipientis  
Bacteria; Pseudomonadota; Alphaproteobacteria; Rickettsiales;  
Anaplasmataceae; Wolbachieae; Wolbachia.

REFERENCE 1 (bases 1 to 13798)

AUTHORS Fiutek,N., Couger,B.M., Roy,S., de la Torre,J.R. and Connor,E.F.

TITLE Genomic assessment of the contribution of the Wolbachia  
endosymbiont of Eurosta solidaginis to gall-induction

JOURNAL International Journal Molecular Sciences

REFERENCE 2 (bases 1 to 13798)

AUTHORS Fiutek,N., Couger,B.M., Roy,S., de la Torre,J.R. and Connor,E.F.

TITLE Direct Submission

JOURNAL Submitted (10-FEB-2023) Biology, San Francisco State University,  
1600 Holloway Ave, San Francisco, CA 94132, USA

COMMENT ##Genome-Assembly-Data-START##  
Assembly Date :: JUN-2019  
Assembly Method :: FLYE v. 06-2019  
Genome Representation :: Full  
Expected Final Version :: Yes  
Genome Coverage :: 100.0x  
Sequencing Technology :: Illumina HiSeq; PacBio Sequel  
##Genome-Assembly-Data-END##

FEATURES Location/Qualifiers

source 1..13798  
/organism="Wolbachia pipientis"  
/mol\_type="genomic DNA"  
/submitter\_seqid="contig\_53607"  
/isolate="wEsol"  
/isolation\_source="galls on Solidago altissima"  
/host="Eurosta solidaginis MN-2018-EFC"  
/db\_xref="taxon:955"  
/environmental\_sample  
/country="USA: Cowling Arboretum, Carleton College,  
Northfield, MN"  
/lat\_lon="44.48 N 93.13 W"  
/altitude="280 m"  
/collection\_date="2018-11"  
/metagenome\_source="insect metagenome"  
/note="metagenomic"

gene complement(<1..1041)  
/locus\_tag="wEsol\_01254"

CDS complement(<1..1041)  
/locus\_tag="wEsol\_01254"  
/codon\_start=1  
/transl\_table=11  
/product="hypothetical protein"  
/translation="MKETKGKNNKSPVRLKATAKEFNFSKLRADQDNKLANSGETMF  
LDFQRMNFIINGKEIDKNLIIAFKEGAKHRKSELFNSDDIYNDEIFNKKGTREIDTDH  
GKAFVASVLEDIEKELVSNALGELWKNHCENSKTANHQKTDSYKKEFEFEFYNAGQRYI  
HLLPTEKDENDYRSFAKEVFKKMFRYAGAEVPSDAILEELVTNCNQAGYEAPFIQT  
QLALGQSFIVENPKKVINIDCANQNNVRIRSMDRLPILSVKNQVMHGDKICNLSSSLE  
FTIESHNGEDFVTYRDGKLSLTIPKELKNYKDNGKSLFDIIKEYFQKFCAKLGFKPET  
KIQIEHGFGAQS"

/besthit="qcoverage 100 , hcoverage 65.3483992467043 ,  
similarity 100 , identity 100 , evaluate 2.80e-246 ,  
alnlength 347 , Bacteria , Proteobacteria ,  
WP\_038198650.1 MULTISPECIES: hypothetical protein  
[Wolbachia]"

gene 1222..2499  
/locus\_tag="wEsol\_01255"

CDS 1222..2499  
 /locus\_tag="wEsol\_01255"  
 /codon\_start=1  
 /transl\_table=11  
 /fullproduct="qcoverage 100 , hcoverage 100 , similarity 100 , identity 100 , evalue 3.82e-310 , alnlength 425 , Bacteria , Proteobacteria , WP\_015589105.1 MULTISPECIES: adenylosuccinate synthase [unclassified Wolbachia]"  
 /cog="PurA COG0104 430 Adenylosuccinate synthase"  
 /pfam="Adenylsucc\_synt"  
 /tigr="TIGR00184 purA 425 adenylosuccinate synthase"  
 /product="adenylosuccinate synthase"  
 /translation="MNNIVIIIGLQWGDEGKGKIVDYLSNADVVVRFQGGNNAGHTIV VDDEVYKLNLLPSAVLRPGKISIIINGVALDSHALVSEIESLKVKGVDINYNLMVSE SCPLILSVHKDKKEKLFEDLNGNHKIGTTNKGIGPCYEDKVGRRAIRLCDLENADELNK RVDTLNLYHNAIRKGLNYQVVKKEEILKEIQEISEKILPYKKPVWKILNDLMKEGKKI IFEGAQGAFLDIDHGTYPFVTSNTVASQAITGSGLSSNAYIIGVVKAYTTRVGNVGP PTEQKNEVGDSLFTIGKELGTVSNRRRRRCGWFDVAVLRQAVQLSGVSSIVLTKLDVLD SFDTIKICTGYKYSKMYDYLPAHSIQGELEPIYEEFPGWKENTQGKRSIKALPINL IKYIDRLEKLGVPPIHLISTSPKREDVIKDKDF"  
 /besthit="qcoverage 100 , hcoverage 100 , similarity 100 , identity 100 , evalue 3.82e-310 , alnlength 425 , Bacteria , Proteobacteria , WP\_015589105.1 MULTISPECIES: adenylosuccinate synthase [unclassified Wolbachia]"

gene 2738..2890  
 /locus\_tag="wEsol\_01256"

CDS 2738..2890  
 /locus\_tag="wEsol\_01256"  
 /codon\_start=1  
 /transl\_table=11  
 /product="hypothetical protein"  
 /pfam="DUF4096"  
 /translation="MVSKEFPKWRNCYDYFKKWSEKPDANKESVLELVLKKNNCDKTM VGKASA"  
 /besthit="qcoverage 100 , hcoverage 52.6315789473684 , similarity 100 , identity 100 , evalue 3.20e-29 , alnlength 50 , Bacteria , Proteobacteria , WP\_082941430.1 MULTISPECIES: transposase [unclassified Wolbachia]"

gene 3035..3331  
 /locus\_tag="wEsol\_01257"

CDS 3035..3331  
 /locus\_tag="wEsol\_01257"  
 /codon\_start=1  
 /transl\_table=11  
 /fullproduct="qcoverage 100 , hcoverage 100 , similarity 100 , identity 99.0 , evalue 4.24e-61 , alnlength 98 , Bacteria , Proteobacteria , ERN55866.1 transposase [Wolbachia pipientis wMelPop]"  
 /cog="COG3293 COG3293 124 Transposase and inactivated derivatives"  
 /pfam="DDE\_Tnp\_1\_2 DDE\_Tnp\_1"  
 /product="transposase"  
 /translation="MVENAKENLSGVKNVLVDAGYTGKNFVTQIKTIIGATVEVIKRN ELRSFVVLPRKWVVERSFAWLEKCRRLWKNKNCERKLNTSLQMVVLAFTALLKKL"  
 /besthit="qcoverage 100 , hcoverage 100 , similarity 100 , identity 99.0 , evalue 4.24e-61 , alnlength 98 , Bacteria , Proteobacteria , ERN55866.1 transposase [Wolbachia pipientis wMelPop]"

gene 3582..4952

CDS

```

/locus_tag="wEsol_01258"
3582..4952
/locus_tag="wEsol_01258"
/codon_start=1
/transl_table=11
/fullproduct="qcoverage 91.8859649122807 , hcoverage
81.0444874274662 , similarity 99.8 , identity 99.8 ,
evaluate 1.42e-283 , alnlength 419 , Bacteria ,
Proteobacteria , WP_227738587.1 hypothetical protein
[Wolbachia endosymbiont of Drosophila simulans]"
/translation="MIGSLAKEEKTAEAGKTGDQLEKCIGPTSLNREVYCSTLIYYTL
KELYSQLGDISYANKTRSEKEIINFYVLPQFACFKEIIDEDIKKDPSFANSAIVKFCS
SIIKNNKLLKELEEVSIPAKNSSVKARVSFQKLNLEKVVWFLRELKEKKNFTYVQGAF
GDGWSFYDLINDRDFKQTYIDKAVTESANKSFKEDIDKCIELAEQGGKKTASKYFERKD
VELQAYYTETDNAHRVLNVNLINYNKSEPTRISDILQQEKDIKKLNIYCNKKHEIYAY
QEDKKRYEYEFKEGTCYEMTSTWPIKDEFGNVSICTMIMNVSSGRITEVLKFNGEDFVS
SEEILELIKQNDELYIQSLSLYDAVLEKGAADVPTANNNFQNESIVAYRKEPEGEL
DPKVADADNSLPPSINSNASTQTEVNLQTLKLKQKLLHNKSKLKRKSIYSTLELRQNLL
HNKWMN"
/product="hypothetical protein"
/besthit="qcoverage 91.8859649122807 , hcoverage
81.0444874274662 , similarity 99.8 , identity 99.8 ,
evaluate 1.42e-283 , alnlength 419 , Bacteria ,
Proteobacteria , WP_227738587.1 hypothetical protein
[Wolbachia endosymbiont of Drosophila simulans]"

```

gene

4940..6067

CDS

```

/locus_tag="wEsol_01259"
4940..6067
/locus_tag="wEsol_01259"
/codon_start=1
/transl_table=11
/product="hypothetical protein"
/pfam="Pfam-B_1653"
/translation="MDELILNNQMLSEKNVELKQEMS NLKKEAVELKQEIEAGLQVIN
KKHHELIQENQRLQEKLETTQAEANQTIVKLEKQNSDLQDRFEKEEQKNTTELQTELAQ
KNEELAGVLKELQGKAQELKGVYEEKRKLKEELKIVNAGKKNLEKELNQAREDAEQIM
VERRQOKERLKDQLRELDQEYKVQVEIGQKIKESDRQDSDLQDTLGEERLKLNIEELE
NEYEEFPQDKVLTLELTKDDEKVEELRNELEKEKEKCKQLLEENENWGDELVGMLDGL
EEKIRADEQRSFNNQLTGEISNESGNAPRQKKRLSKSSSVDNESYVPLREKTTLLRSL
SVDSGLDSDDEENCNDLSFNISPISSIEKVAESRNVGRVSL"
/besthit="qcoverage 100 , hcoverage 77.962577962578 ,
similarity 98.9 , identity 98.4 , evaluate 2.83e-163 ,
alnlength 375 , Bacteria , Proteobacteria , EEH12427.1
hypothetical protein WUni_002010, partial [Wolbachia
endosymbiont of Muscidifurax uniraptor]"

```

gene

6180..6443

CDS

```

/locus_tag="wEsol_01260"
6180..6443
/locus_tag="wEsol_01260"
/codon_start=1
/transl_table=11
/fullproduct="qcoverage 100 , hcoverage 100 , similarity
100 , identity 100 , evaluate 7.84e-52 , alnlength 87 ,
Bacteria , Proteobacteria , WP_007550159.1 MULTISPECIES:
translation initiation factor IF-1 [Wolbachia]"
/cog="InfA COG0361 75 Translation initiation factor 1
(IF-1)"
/pfam="eIF-1a"
/tigr="TIGR00008 infA 69 translation initiation factor
IF-1"

```

```

        /product="translation
        initiation factor IF-1"
        /translation="MIKDEKSKTIFEVEGAVTALLPAAEFRVKLDNEHEIICHVSGKV
        RRSKIRIIIGDRVLVEMSIYDRNARKGRIIRRLKGTSDRTISK"
        /besthit="qcoverage 100 , hcoverage 100 , similarity 100
        , identity 100 , evalue 7.84e-52 , alnlength 87 ,
        Bacteria , Proteobacteria , WP_007550159.1 MULTISPECIES:
        translation initiation factor IF-1 [Wolbachia]"
gene      6421..7017
        /locus_tag="wEsol_01261"
CDS       6421..7017
        /locus_tag="wEsol_01261"
        /codon_start=1
        /transl_table=11
        /fullproduct="qcoverage 100 , hcoverage 100 , similarity
        100 , identity 100 , evalue 3.61e-135 , alnlength 198 ,
        Bacteria , Proteobacteria , WP_007550161.1 MULTISPECIES:
        Maf family nucleotide pyrophosphatase [Wolbachia]"
        /cog="Maf COG0424 193 Nucleotide-binding protein
        implicated in inhibition of septum formation"
        /pfam="Maf"
        /tigr="TIGR00172 maf 185 septum formation protein Maf"
        /product="Maf family
        nucleotide pyrophosphatase"
        /translation="MTERSLNNLILASSSKRRIALLKQINIEPGLILPADIDEAPLKK
        ELPKDYSIRMAKSKAEKIQSSNPYFVLGVDTVVACGRILLKAENVEQAEKCIRLLS
        GRRHRVYTSVCLLTPDQSKQHIRTVVTVIVKFKRLSEQEIKYYLASEEWKNRAGGCNIQ
        GLAGVFVFLRGSYSSVIGLPLHETYCLLSNYFNFNLY"
        /besthit="qcoverage 100 , hcoverage 100 , similarity 100
        , identity 100 , evalue 3.61e-135 , alnlength 198 ,
        Bacteria , Proteobacteria , WP_007550161.1 MULTISPECIES:
        Maf family nucleotide pyrophosphatase [Wolbachia]"
gene      complement(7009..9687)
        /locus_tag="wEsol_01262"
CDS       complement(7009..9687)
        /locus_tag="wEsol_01262"
        /codon_start=1
        /transl_table=11
        /fullproduct="qcoverage 100 , hcoverage 100 , similarity
        100 , identity 100 , evalue 0.0 , alnlength 892 ,
        Bacteria , Proteobacteria , WP_174516893.1 hypothetical
        protein [Wolbachia endosymbiont of Cardiocondyla
        obscurior]"
        /translation="MGTNDTQQEHIYNERIQEIFPLFDKIRKEDDPIYNARVDFNTVK
        FLTKHANWNWDEEENKDKAYGVILQKCDKTKKAGQDLESEVKERLKEYVDDVAGVSIY
        GNHASITLGNNKKEFKISEFLNSDFCEKNEISGFSTLHSDGKSGMHGFVAEEEGKKIR
        HYVVTGDSYEMTLKWYAEKGKECKIKIKIDANGVDLVKGDDFSLERLEVNRDVKIGGLF
        LHEIQFREKGQGVNEVQHNNKDSNELSSETTTRIDVNRDVSQATDITRKEDHHS HF
        GPQSNSRRQSYDSGIGKDFDDKINSQEAKEKREL RQAAREANSGGQVYNLQSLFEENP
        QNKKTPPPLPPTSSLPKKGVFDEQGGAKSGSQKPDDLRENEQTPNNQQKGATSDSS
        DSSTFTKSVSHNQDNRQEDERYDNPTFGHAVPGSQKPDRSEQTPNDQQQPKTQQQEGN
        SKGDLLQDIRNFKNNLRHIDVDDRKASIAGSRKNNPSPLET LKDRIPYSSSPDNSDN
        QDASDAKWKESEQPLSATALNNKSDSGYSSP THDNNEQSQVNPEQLKKSLENIEQSDQ
        TPPENLLKEIRDRSQQDNRGLRQVDPTDKLSQDKEDGLQKDDLADV KIVEGPTVSVSA
        STPNISDSGYISPTNSDSKSQTDLKQVGRKLEEHIRQSNLTLFEELKNTLGQENLGL
        KPADQSQISEETKKRLREVGLLKDSSTDIKANDSGYSSP THDNNEQSQVNPEQLKKS L
        ENIEPK EIGDTSELKGALGNPDKGLREPAQQATKENIPKDSFSENILEKIGEGKQYDP
        IRKWLEKTVAERENNDTNPTVDKNSELYK LLEKDEAQLKAGVIEEERGDTLTEHTDGY
        DRNRIALANRNKRPLDWAKQVAESQQKKDTNKGISI"
        /product="hypothetical protein"

```

```

/blasthit="qcoverage 100 , hcoverage 100 , similarity 100
, identity 100 , evalue 0.0 , alnlength 892 , Bacteria ,
Proteobacteria , WP_174516893.1 hypothetical protein
[Wolbachia endosymbiont of Cardiocondyla obscurior]"
gene complement(10034..10336)
/locus_tag="wEsol_01263"
CDS complement(10034..10336)
/locus_tag="wEsol_01263"
/codon_start=1
/transl_table=11
/product="hypothetical protein"
/pfam="Na_Ala_symp"
/tigr="TIGR00835 agcS 424 amino acid carrier protein"
/translation="MAIMFCFAFTTIFTWFFCSKQTIRYVSM DNKYTKIWIVIFTMII
PLGAIGKVRLLWDVADISIAALLFINILAILKLTSQDPEVFTMSSRYLKLQKQSYS"
/cog="AlsT COG1115 452 Na+/alanine symporter"
/blasthit="qcoverage 100 , hcoverage 27.2479564032698 ,
similarity 100 , identity 99.0 , evalue 5.98e-57 ,
alnlength 100 , Bacteria , Proteobacteria ,
WP_006279442.1 alanine:cation symporter family protein,
partial [Wolbachia endosymbiont of Muscidifurax
uniraptor]"
gene complement(10347..11117)
/locus_tag="wEsol_01264"
CDS complement(10347..11117)
/locus_tag="wEsol_01264"
/codon_start=1
/transl_table=11
/product="hypothetical protein"
/pfam="Na_Ala_symp"
/tigr="TIGR00835 agcS 424 amino acid carrier protein"
/translation="MAIIIVITSVIKYVTCYLSIKTRKEKNRFIGGPVAYMADAFNS
RKATIVFLVVMIMVSITVGNLVQVNSLSIPLNMIDVPVVI GGIVMAIIFVVAALSLK
KIKIFISAMIPIMTVSYLTLCGIILFKFSENILPSLKLITSSFFTSSFNSGLSLGLI
LEMLTIIQVGTLRGIFATDIGLGLEGIVHSSIVPKNNNKFIIEQSLITIISPFI VAF
IVFITTMVLLVTD SWITDLESTNMCIFA FRKAMNWPLY"
/cog="AlsT COG1115 452 Na+/alanine symporter"
/blasthit="qcoverage 99.21875 , hcoverage 56.8232662192394
, similarity 100 , identity 100 , evalue 2.70e-157 ,
alnlength 254 , Bacteria , Proteobacteria ,
WP_015589108.1 MULTISPECIES: alanine:cation symporter
family protein [unclassified Wolbachia]"
gene 11837..12106
/locus_tag="wEsol_01265"
CDS 11837..12106
/locus_tag="wEsol_01265"
/codon_start=1
/transl_table=11
/fullproduct="qcoverage 100 , hcoverage 100 , similarity
100 , identity 100 , evalue 2.67e-62 , alnlength 89 ,
Bacteria , Proteobacteria , WP_007552972.1 MULTISPECIES:
IS110 family transposase [Wolbachia]"
/cog="COG3547 COG3547 303 Transposase and inactivated
derivatives"
/pfam="DEDD_Tnp_IS110"
/product="IS110 family
transposase"
/translation="MQVNAILGVDISKKKFDVCLLVDSKKRHKVFQNNQDGF AKLVVW
CNGHGANLTHLCLEATSWYGEDLATFMHDLGHNVSIVNPESFWQK"
/blasthit="qcoverage 100 , hcoverage 100 , similarity 100

```

```

, identity 100 , evalue 2.67e-62 , alnlength 89 ,
Bacteria , Proteobacteria , WP_007552972.1 MULTISPECIES:
IS110 family transposase [Wolbachia]"
gene 12226..12552
/locus_tag="wEsol_01266"
CDS 12226..12552
/locus_tag="wEsol_01266"
/codon_start=1
/transl_table=11
/pfam="Transposase_20"
/fullproduct="qcoverage 100 , hcoverage 100 , similarity
100 , identity 100 , evalue 2.83e-66 , alnlength 108 ,
Bacteria , Proteobacteria , WP_007549647.1 MULTISPECIES:
transposase [Wolbachia]"
/translation="MQSLKDDKVQQTNRLNKNMHSSCKEAIISKVILAIIEEQIIVLEK
EINEHINNYPHLKNMVENLKTIKGIGYLTAVAVVAEMPSVDNFDNAKQFTAFARTLS
IGIVSK"
/product="transposase"
/besthit="qcoverage 100 , hcoverage 100 , similarity 100
, identity 100 , evalue 2.83e-66 , alnlength 108 ,
Bacteria , Proteobacteria , WP_007549647.1 MULTISPECIES:
transposase [Wolbachia]"
gene 12491..12781
/locus_tag="wEsol_01267"
CDS 12491..12781
/locus_tag="wEsol_01267"
/codon_start=1
/transl_table=11
/pfam="Transposase_20"
/fullproduct="qcoverage 100 , hcoverage 100 , similarity
100 , identity 100 , evalue 2.78e-65 , alnlength 96 ,
Bacteria , Proteobacteria , WP_081600779.1 MULTISPECIES:
transposase [Wolbachia]"
/translation="MLNNLQLLLLPGHYQSGSSVSKRSCICKIGSERIRKALYMPAIVV
KNHNNHFQKFCQRLASKGKCPKVIVLALMRKLMHVFFGILKKNQPFNCNFVG"
/product="transposase"
/besthit="qcoverage 100 , hcoverage 100 , similarity 100
, identity 100 , evalue 2.78e-65 , alnlength 96 ,
Bacteria , Proteobacteria , WP_081600779.1 MULTISPECIES:
transposase [Wolbachia]"
gene complement(12938..13441)
/locus_tag="wEsol_01268"
CDS complement(12938..13441)
/locus_tag="wEsol_01268"
/codon_start=1
/transl_table=11
/pfam="DsbC"
/fullproduct="qcoverage 100 , hcoverage 100 , similarity
100 , identity 100 , evalue 2.10e-121 , alnlength 167 ,
Bacteria , Proteobacteria , WP_015589109.1 MULTISPECIES:
hypothetical protein [Wolbachia]"
/translation="MKIYIYLILFLFFSCAQLYADEEIAKFDLLIGEINEASFTLKGA
IKVTVEPGWHIYYKDPGDFGLPTSISYKGNASDINIHWPIPKCHKDKVGRETFVSNVY
EDMVLFFPKMNI FLNQGYIDLNFHINYAICKDRICIPKNVEIKIRQPLKDFIDSDINKL
INWEYEK"
/product="hypothetical protein"
/besthit="qcoverage 100 , hcoverage 100 , similarity 100
, identity 100 , evalue 2.10e-121 , alnlength 167 ,
Bacteria , Proteobacteria , WP_015589109.1 MULTISPECIES:
hypothetical protein [Wolbachia]"

```

ORIGIN

```

1  gttacttttga gcaccgaagc catgctctat ttgtatTTTT gtctcagggt taaatcctaa
61  ttttgcacag aatttctgaa aatattcttt aataatgtca aacaagctct tgccattatc
121 tttataatTT ttttaactctt taggaatagt aagtgacaat ttaccatctc tgtatgttac
181 aaagtcttca ccattgtgag attcaattgt aaattccaat gaactagaca gattacatat
241 cttatcgcca tgcataactt gatttttaac agagagtatt ggtagcctca tatcagatct
301 aattctcaca ttatttttgt tagcacaatc aatgtttatt acttttttag gattttctac
361 tatgaacgac tgtccaagtg caagttgggt ttgtataaat ggagcagcct cataccctgc
421 ttgattacaa ttggtaacta gctcttctaa aatagcatca cttggaactt ctgcccagc
481 gtatctgaac atttttttga aaacttcttt tgcaaaggaa cggtaatcct tgttttcac
541 tttctctggt ggtaatagat ggatatacct ttggccagca ttgtaaaatt cttcaaattc
601 tttcttatat gaatcggttt tttgatgatt ggcagttttg gaattttcac agtgattttt
661 ccatagctca cccaatgcat tacttacaag ctctttctca atatcttcga gtactgaagc
721 aacaaaagct ttgccatgat ccgtatctat ttctcttggt ctttttttgt taaatatttc
781 gtcattatat atatcatcac tattaataaag ttctcttttg cgggtgcttag ctcttcctt
841 aaatgcaata ataagatttt tatctatttc ttttccgtta ataataaaat tcatcctttg
901 aaaatctaag aacattgttt caccggaatt cgctaattta ttatcttgat ctgctcttaa
961 tttactaaaa ttgaactctt tagctgtggc ctttaatcta actactggac tcttattatt
1021 ttttcctttt gtctctttca taaataacac cttactgtaa atatgctgta agttatatca
1081 tataatgatg aataatttgg taatatatta agaaaatcga cagtatattt ctttatttaa
1141 ggggtgtagg aaaggcgtag atttctcttt tcatttgtag cgtactgtat taatatttat
1201 gtattaatTT agaaaataat gatgaataac attgtaatta ttgggtctgca atggggtgac
1261 gaaggcaagg gtaaaatagt agattatctt tctgagaatg cagatgtagt tgtgagattt
1321 cagggaggaa ataatgcagg gcacactata gtagtagatg atgaggttta taaattaaat
1381 ttactgccct ctgctgtttt gaggccaggc aaaatatcta ttataggaaa cgggtgtgct
1441 cttgattcgc atgctctagt ttcagaaata gagtcattga aagttaaagg agtggacata
1501 aactataaca acttgatggt atccgagagc tgtccattaa tacttagcgt acataaggac
1561 aaggaaaagc tatttgaaga tttaaacgga aatcacaaaa ttggtacaac aaacaaaggg
1621 atagggccat gttatgaaga taaagtggc aggagagcta tacgcctttg tgacttagaa
1681 aacgcagatg agctcaacaa aagagtggat actcttctga attaccacaa tgctatcaga
1741 aaaggcctta actaccaggt ggttaaaaaa gaagaaatat taaaggaaat tcaagagatt
1801 tcagaaaaaa ttcttccata taaaaaacct gtatggaaga tattaatatga cttgatgaaa
1861 gaaggtaaga aaataatatt tgaaggtgcc caaggcgcct ttttagatat cgaccacgga
1921 acttaccctt ttgttacttc aagtaatacc gtagcatcgc aagcaataac aggtcagga
1981 ttatcctcca atgcttacat tattggtgtg gtaaaagctt atacaacaag agtgggcaat
2041 ggtccattcc ctactgagca aaagaacgaa gtgggggaca gcttattttac tataggcaag
2101 gaacttgcaa cagtgaacaa taggagaagg cgttgcggat ggttcgaatg agtttttagt
2161 cgccaggccg tacaactctc tggagtttca agcattgtat taaccaaatt agatgtgctt
2221 gattcttttt atacaattaa aatatgcact ggttacaagt atagcggaat aatgtatgat
2281 tatttaccgg catcgcattc aatacaaggg gaattagagc caatatatga agagtttcct
2341 ggctggaaag aaaacactca aggtaaaagg tcgattaaag cattgcctat caatttaata
2401 aaatatatag acaggttaga aaaattaata ggtgtaccaa ttcattctaat ctcaactagt
2461 ccaaagagag aggatgttat taagcttaaa gatttctgaa aacgtctttg tatcttagag
2521 cctgtacgta atctcaaaaa agagataaag tgagaggata aagtatataa agtaggatat
2581 gcgaagttta taaccaagtg acataagtcg agaaaagttt gagattattg tagcagatct
2641 ggaatcttgc agaaagaaga caaaaccaag aacacttgat ttacatgatg tattttgtgg
2701 agtgttatac gtgttaaaaa gtggttgcca gtggagaatg gtatcaaaaag agttcccaaa
2761 atggcgcaat tgttacgact attttaagaa gtggagttaa aaaccagatg caaataaaga
2821 aagtgttctg gagctggtat taaaaaaaaa taattgcgac aaaacaatgg tcggaaaagc
2881 ttctgcataa ttgatgcaca gagtataaaa aatgcagata ctgctgaagc tatgatgcag
2941 gcaagaagat ttcagggccg tattgcagta gatacgcaag catgcaattt atacaacaac
3001 agcagagata actgaccgta gcagtgtgtg gagaatggct gaaaatgcaa aagaaaacct
3061 ctcgggagtt aaaaatgtac tggttgatgc aggctatact ggaaagaatt ttgtaactca
3121 aataaaaaac attattggtg caaccgttga agtgatcaaa agaaatgaat tacgttcctt
3181 tgttgatttg cccaaaagat gggttgtgga gcatctttt gcttggttag aaaaatgtag
3241 aagattgtgg aaaaattgtg agcgaaaact caatactagc ctacaaatgg tagttctggc
3301 tttcactgcc ttacttctga aaaaattatg aacaggctct tactaactct tatctaataa
3361 aaaaataact gtgtaacttc gaatagtcta ttatgcaaga cagcagtata aacatgtagt
3421 aagaaatgta taatgaaaaa taaaagctca agtttaacac ttgcagttat ttttacacaa
3481 ttaagtaatc ataaaagtta gtgtaggacg aggttataca gtttgatttc ttttaataata

```

|      |             |             |             |             |             |             |
|------|-------------|-------------|-------------|-------------|-------------|-------------|
| 3541 | tgттааттgg  | tataatataa  | atatagttaa  | ggaggtgtat  | tatgattgga  | agtttggcta  |
| 3601 | aagaagaaaa  | aacagcagag  | gcaggaaaaa  | caggtgatca  | acttgaaaag  | tgtattggac  |
| 3661 | caacttcact  | gaatagggag  | gtttattgct  | ctacgcttat  | ctactataca  | ttaaaagagt  |
| 3721 | tatattcaca  | attaggtgat  | atctcttatg  | ctaataaaac  | aagatcagaa  | aaagaaataa  |
| 3781 | tcaatttttta | tgttctacct  | caatttgcac  | gttttaaaga  | aattattgat  | gaagatataa  |
| 3841 | aaaaagatcc  | ttcgtttgca  | aattctgcta  | ttgtaaagtt  | ttgctcctca  | attataaaaa  |
| 3901 | ataacaaatt  | acttaaagaa  | ttagaagaag  | ttagtattcc  | tgccaaaaac  | tctagtgtaa  |
| 3961 | aggcaagggg  | aagctttcaa  | ctgaaaaatc  | tgaaagaaaa  | ggtgtgggttc | ttaagagaac  |
| 4021 | taaaggaaaa  | aaagaatttc  | acttacgtgc  | agggggcctt  | tgggggatggg | tggagttttt  |
| 4081 | atgacctaat  | aaacgataga  | gatttttaaac | aaacgtacat  | agataaagca  | gtaacagagt  |
| 4141 | ctgctaataa  | gagctttaag  | gaagatatag  | ataaatgcat  | agagttggca  | gagcagggaa  |
| 4201 | aaaaaactgc  | aagtaaatat  | tttgagagga  | aagacgtaga  | gcttcaagct  | tattacacag  |
| 4261 | aaactgataa  | tgctcataga  | gttttgaaatg | ttaaccttat  | taattacaat  | aaaagtgagc  |
| 4321 | caacaagaat  | tagtgacatt  | ttacagcaag  | agaaagatat  | taaaaaattg  | aatatctatt  |
| 4381 | gcaataaaaa  | acatgaaata  | tacgcttatc  | aagaagataa  | gaaaagatat  | tatgaattta  |
| 4441 | aagaaggcac  | atgttatgaa  | atgacaagca  | cttggcctat  | aaaggatgag  | ttcgggaatg  |
| 4501 | tttcaatttg  | taccatgatt  | atgaatgtga  | gtagcggtcg  | cataactgaa  | gtactaaaat  |
| 4561 | ttaatgggtga | agattttggt  | tcacgaggag  | agatcttaga  | attgataaag  | caaaatgatg  |
| 4621 | aattatatat  | tcaaagtctc  | tccttatatg  | atgctgtact  | agaaaagggg  | aaggctgctg  |
| 4681 | atgttgtgcc  | tactgctaata | aacaattttc  | aaaatgaatc  | tatagtggcc  | tatcgcaagg  |
| 4741 | aaccagaggg  | ggaattagac  | cctaaagttg  | atgctgacaa  | tagccttcct  | ccttctatta  |
| 4801 | atagcaatgc  | atcaactcaa  | acggaagtca  | atttacaac   | actgaaactc  | aaacagaagt  |
| 4861 | tgcttcacaa  | caaatcgaaa  | ctaaaacgga  | agtcaattta  | cagcacactg  | gaactcagac  |
| 4921 | agaatttgct  | tcacaacaaa  | tggatgaatt  | gatttttaaat | aatcagatgc  | tgtccgaaaa  |
| 4981 | aaacgttgaa  | ttgaagcaag  | aaatgtcaaa  | tttgaaaaaa  | gaagctgttg  | aattgaagca  |
| 5041 | agaaatagaa  | gcaggggtgc  | aagtgataaa  | taaaaagcac  | catgaattaa  | tacaagaaaa  |
| 5101 | tcagcgacta  | caggagaaac  | tagaaacaac  | ccaagcagaa  | gctaatacaa  | caattgtaaa  |
| 5161 | gttagagaag  | cagaatagcg  | atttacaaga  | caggtttgaa  | aaagaggagc  | aaaaaaacac  |
| 5221 | ggaattgcaa  | actgaactgg  | cacaaaaaaa  | tgaagaatta  | gcaggtgtgt  | taaaagagct  |
| 5281 | acaagggaaa  | gcacaagaac  | ttaaaggtgt  | atatgaagaa  | aaaagaaaagc | taaaggaaga  |
| 5341 | gctgaaaatt  | gttaatgcag  | gaaagaagaa  | tttggaaaaa  | gagctaaatc  | aagcacgaga  |
| 5401 | agatgcggaa  | cagataatgg  | ttgaacgacg  | ccagcagaaa  | gagcgcttga  | aagatcagct  |
| 5461 | aagagaatta  | gatcaggaat  | ataaggtaca  | agtagaaaatt | gggcaaaaaga | ttaaagaatc  |
| 5521 | agataggcag  | gatagcgatt  | tacaagatac  | acttggagaa  | gagagactaa  | aactcaacat  |
| 5581 | tgaagaacta  | gaaaacgagt  | acgaggaatt  | tccaggagat  | aaggtgctta  | cacttgaact  |
| 5641 | cactaaagat  | gaagataaag  | tcgaagagtt  | aagaaacgag  | ctagagcggtg | agaaaagaaaa |
| 5701 | gtgtaaacaa  | ttattagaag  | aagaaaatga  | atgggggtgat | gaattgggtag | gaatgcttga  |
| 5761 | tggactggaa  | gaaaaaattc  | gtgctgatga  | acaaaggagc  | ttcaacaatc  | aattaacggg  |
| 5821 | agaaattttct | aatgagtctg  | gtaatgctcc  | acgacagaag  | aaaaggttat  | ccaaatcttc  |
| 5881 | aagcgttgat  | aatgagtctt  | atgttccact  | gagagagaag  | acaacattac  | tcagatcttt  |
| 5941 | aagcgttgat  | agtggacttg  | atagcgatga  | agaaaattgt  | gataatgatt  | tatctttcaa  |
| 6001 | cataagtcct  | ataagttcta  | ttgagaaggt  | ggcagagagt  | agaaacgtag  | gtaggggtatc |
| 6061 | attgtgaaga  | tggttggggg  | taagttgcaa  | cttaagtggg  | gcgcaaaaagg | tcttttgtgt  |
| 6121 | tgataataat  | ttaaaatcta  | tagtagacta  | aaaaagatta  | ttaaattata  | atataacata  |
| 6181 | tgataaaaaga | cgagaaatcg  | aaaacaattt  | ttgaagtgga  | aggggcagta  | actgctttac  |
| 6241 | tacctgcagc  | agaattttaga | gtgaaactgg  | acaatgaaca  | tgagattatc  | tgtcatgtat  |
| 6301 | cagggaaggt  | gagaagaagt  | aaaatacgca  | tcattatagg  | ggatagggtg  | ttagttgaga  |
| 6361 | tgagcattta  | cgataggaat  | gcgagaaaag  | gtaggatcat  | tagaaggctt  | aaaggtacaa  |
| 6421 | gtgacagaac  | gatctctaaa  | taatcttatt  | cttgcttcat  | catcgaaaag  | gcgtatagct  |
| 6481 | ttactaaaaac | aaataaacat  | tgagccaggt  | ttaattttgc  | cagcagatat  | agatgaagcc  |
| 6541 | ccttttaaaaa | aggaacttcc  | gaaggattac  | tcaatccgta  | tggcaaaaag  | taaagcggag  |
| 6601 | aaaatacaaa  | gctcaaatcc  | aaattacttt  | gtgcttggtg  | ttgatacagt  | tgttgcttgt  |
| 6661 | ggtagaagga  | tattgctcaa  | agctgaaaaac | gttgagcaag  | cagaaaaaatg | tatccgcttg  |
| 6721 | ttatcaggaa  | gaaggcatag  | agtatacacc  | agtgtatgtc  | tattaactcc  | cgatcaatct  |
| 6781 | aaacaacata  | tcaggactgt  | ggttacaata  | gtgaaattta  | aacgtctcag  | tgaacaagaa  |
| 6841 | attaagtatt  | atttagcatc  | agaagagtgg  | aaaaataggg  | cgggggggatg | caatatacaa  |
| 6901 | ggcctagctg  | gagtgttcgt  | attgttctta  | cgcggctcct  | actcttcctg  | tatagggtta  |
| 6961 | ccattacatg  | aaacctattg  | tttgctaagc  | aattatttta  | acttcaattt  | atattgaaat  |
| 7021 | acctttatta  | gtatcttttt  | tttgttgtga  | ctcagcaacc  | tgttttagccc | aatctagtgg  |
| 7081 | tcttttattt  | ctgtttagcta | atgcaattct  | attgcgatca  | taaccatcag  | tgtgttctgt  |

|       |            |             |             |             |             |             |
|-------|------------|-------------|-------------|-------------|-------------|-------------|
| 7141  | taaagtatct | cctcttttctt | cttctattac  | tccagctttc  | agttgtgctt  | catctttctc  |
| 7201  | tagtaattta | tatagttcgc  | tattttttatc | tacagttgga  | ttagtgtcat  | tattttctcg  |
| 7261  | ttctgccact | gttttttcta  | accactttacg | tatagggcca  | tattgtttac  | cttctcctat  |
| 7321  | cttttctaaa | atgttttctg  | agaatgaatc  | tttaggaata  | ttttcttttag | tagcctgttg  |
| 7381  | tgccggttct | cttaaccctt  | tatccgggtt  | tcccaatgct  | ccttttaact  | cactcgatc   |
| 7441  | tccgatttct | tttggttcaa  | tgtttttctaa | gctcttcttt  | aactgttcag  | gatttacttg  |
| 7501  | agattgttca | ttattgtcat  | gagttggaga  | tgaatagccc  | gaatcgtttg  | cttttatgtc  |
| 7561  | tgttgagctg | tcttttagca  | acccaacttc  | tctcaagcgt  | tttttagttt  | cttcgcta    |
| 7621  | ctgactctga | tcagctggtt  | ttaacccgag  | attttcttga  | cctaattgat  | ttttaagt    |
| 7681  | ttcaaataga | gttagattac  | tttgtcta    | atgttcttct  | aatttccttc  | ctacctgtt   |
| 7741  | taaactctgt | tgagatttac  | tatcactatt  | agttggagat  | atatagcctg  | aatcacttat  |
| 7801  | actatttggg | gttgaagcag  | agacactaac  | agttggacct  | tccactattt  | ttacatctgc  |
| 7861  | taaactcgct | ttttgcaatc  | catcttcttt  | atcttgtgac  | agtttatcag  | taggatcaac  |
| 7921  | ttgccttaat | cctctattat  | cctgctgtga  | tctatctctg  | atctctttta  | gaagattttc  |
| 7981  | aggtggagtt | tgatcacttt  | gttcaatgtt  | ctctaagctc  | ttctttaact  | gttcaggatt  |
| 8041  | tacttgagat | tgttcattat  | tgtcatgagt  | tggagatgaa  | tagcccgagt  | cacttttatt  |
| 8101  | attgagtgtc | gtagcagaga  | gcggctgttc  | actttctttc  | cacttagcat  | cactagcatc  |
| 8161  | ttggttatca | ctgttatctg  | gagaagatga  | ataaggaatt  | ctgtccttta  | atgtctctaa  |
| 8221  | cggatgatgg | ttattttttc  | tacttctctg  | aattgatgct  | tttctatcat  | caacatcaat  |
| 8281  | gtgccgtaag | ttgtttttct  | tgaattttct  | gatgtcttgt  | aacagatcgc  | ctttgctatt  |
| 8341  | tccttcttgt | tgctgggttt  | taggttggtg  | ctgatcatta  | gggtgttgct  | cacttctatc  |
| 8401  | tgggttttgg | cttccaggta  | cagcatgtcc  | aaatgtagga  | ttgtcatacc  | gttcatcttc  |
| 8461  | ttgcctatta | tcttgattgt  | ggcttacaga  | cttggtgaaa  | gtagaactat  | ctgaagaatc  |
| 8521  | agaagtgtga | cctttttgct  | gattattagg  | tgtttgctca  | ttttcgcgca  | agtcactctg  |
| 8581  | tttttggctt | ccagatttgg  | ctcccccttg  | ctcatcgaaa  | acaccttttt  | taggtggtag  |
| 8641  | tgaactagtt | ctaggtggaa  | gtggcggagg  | agtttttttg  | ttctgaggat  | tctcctcaaa  |
| 8701  | aagcgattgt | agggtataaa  | cttgacctcc  | cgaatttgct  | tctcgtgctg  | cttgtctaag  |
| 8761  | ctcacgcttt | tcttttagcct | cctgagaatt  | aatttttatca | tcaaaatctt  | ttccaattcc  |
| 8821  | gctatcgtaa | gactgccttc  | tgctgttaga  | ttgtgggtcca | aaatgtgaat  | ggatgatcttc |
| 8881  | tttttttcga | gttatatcag  | tagcttgaac  | gctaacatct  | ctattaacat  | caattcttgt  |
| 8941  | tgtagtttca | gatgatagct  | cgttactgtc  | tttattatgt  | tgcacctcat  | tcacttttcc  |
| 9001  | ttgtcctttc | tccctgaatt  | gtatttcatg  | caagaataaa  | ccacctattt  | ttacatctct  |
| 9061  | gtttacttct | aaccgttcta  | gagaaaaatc  | atcaccttta  | acaagggtcta | caccgttagc  |
| 9121  | atcaatctta | attttgatct  | tacattcctt  | ccccctcgca  | taccacttta  | aagtcatttc  |
| 9181  | atatgaacca | tcagttacga  | cataatgtct  | tatttttttc  | ccttcttctc  | cggcaacaaa  |
| 9241  | accatgcatt | ccgctctttc  | catcactatg  | caatgttgaa  | aatcccgaga  | tttcattctt  |
| 9301  | ctcacaaaaa | tcactgttta  | aaaattcgct  | gatttttaaac | tcttttttgt  | tatttcccag  |
| 9361  | cgtaataact | gcgtgattac  | cgtatattga  | aactcctgca  | acatcatcaa  | catactcttt  |
| 9421  | caacctttct | ttaacttcac  | tttcaaggtc  | ttgtccagct  | ttctttgtct  | tgctgcattt  |
| 9481  | ctgaagaata | actccatatg  | ctttatcttt  | gttttcttct  | tcgtcccaat  | tccagttggc  |
| 9541  | gtgttttgtt | aaaaacttta  | ctgtgttaaa  | atcaactcta  | gcattataaa  | ttgggtcgtc  |
| 9601  | ttcctttctt | attttatcaa  | ataaaggaaa  | aatttcttga  | atgcgctcat  | tataaatgtg  |
| 9661  | ttcttgttgt | gtatcgttag  | tgcccatata  | tccctcacta  | ataaccctct  | gccttttagt  |
| 9721  | ctagctaata | ctagctaata  | taattatcac  | aagcattggg  | tgaattttta  | tttaaggaag  |
| 9781  | ttgtgttact | aatgtgatga  | cacaagctat  | tttatggtaa  | catcaaacga  | tttaagtgtg  |
| 9841  | cattccagtc | tggaatccag  | cctttcacga  | accccatcaa  | aaatgttgtg  | ttttaacata  |
| 9901  | agattagcta | cttttatgct  | cactaactta  | gtgccaatca  | agattcctgg  | atcccagtgt  |
| 9961  | ctgggcactg | ggatgacatc  | cttcttggtg  | gaaatcactc  | ttatatcaca  | acagctgcat  |
| 10021 | agcctaaatt | gcttttagcta | tagctctgtt  | tttgcaactt  | caaatatctg  | ctactcatag  |
| 10081 | taaacacttc | tggatcttga  | gaggttagct  | tgagtatagc  | gagtatgttg  | ataaacaaca  |
| 10141 | aagcagcaat | cgagatatca  | gcaacatccc  | atagcaaccg  | gactttacct  | atcgcaccaa  |
| 10201 | gcggaatgat | catggtaaaa  | attacaatcc  | agatttttagt | gtattttatta | tccatagaca  |
| 10261 | catagcgtat | tgtctgtttt  | gagcaaaaaa  | accaagtaaa  | aatagtagta  | aaagcaaaac  |
| 10321 | aaaacattat | ggccataatt  | aaatagtcaa  | tataagggcc  | aattcattgc  | ctttctaaaa  |
| 10381 | gcaaatatgc | acatgttagt  | gctctctaaa  | tcagtaatcc  | agaatctgtg  | gacaagcagt  |
| 10441 | accattgttg | taataaacac  | tataaacgca  | actataaaaag | gcgatattat  | cgtaattaga  |
| 10501 | ctctgctcaa | taataaaatt  | attgttat    | ttcttaggaa  | caattgaaga  | atgtacgatt  |
| 10561 | ccttcaaggc | caagccctat  | atctgttgca  | aaaataacct  | gcaaagttcc  | aacttgaata  |
| 10621 | atagtcaaca | tttctaaaaa  | caaacctaaa  | gataaaccag  | agttaaagct  | actggttgta  |
| 10681 | aaaaaactgc | ttgttattag  | ttttagagaa  | ggaagaatat  | tttactaaa   | tttaataaat  |

```

10741 atgataccgc aaagtgtgag gtaacttacc gtcattatcg gtatcatagc cgatataaaa
10801 attttaattt tttttaagct gagagctgca acaacaaaaa atattatggc cattacaatg
10861 ccaccaatga ctacaggcac atctatcatg ttaagtggta ttgatagaga atttacctga
10921 acaaggttac caactgttat tgaaaccatt atcataacaa ctagaaacac aattgtagct
10981 tttctagagt taaatgcatac agccatgtag gctacagggc cacctataaa ccgtccgttc
11041 ttttcctttc tgggtttttat acttagataa caagtgcatac attttatcac agaagtgata
11101 acaataatta tcgccatcca caaaatagag cccggtcctc cgggtttttag agcaacagca
11161 gttcctgaaa tatttcctac tccctaaatt tccccctaaa attgtaaaca gagcggctat
11221 agaagaaaat ttattttctc ctttttttagc tccaaggagt gaaagggcgt atggtaatct
11281 aaatacctgt agccatttta gtttaatcga taggtaaaca ccagcaacta gcatgagtaa
11341 tattgttggc agtaataaaaa caaactttac tgtatccatc tgtaaaagtg agatttttat
11401 ttgagtatac aacaaaaaatt gaaaatacct aacctatttt ctatgtatga cttcgtttcc
11461 gtcattctag aaaccttttc ttgtcatcca agtagcgtga catataactg tacgaacatt
11521 gtaatatggt acaatgttaa gacgatgtca tccagtggtc tgggcactgg gatgacatct
11581 tttttcttgg tacaaattac tcttataatc caatgttcgt acagttagtg cgtgacactt
11641 gtatctttat gatgtgaggc attagagcta aaatacctca cagggagggt gaagctgatg
11701 cgacactaat gccattaagc cagattttgc ttcctccca tagagttaaa gactgaacag
11761 tatcttttgg aattatatcc cgtattacaa ggtagtcta aactctcagt ttattttatag
11821 tcttgagggc aattttatgc aagtaaagtc tattttgggt gtggatatatt caaaaaagaa
11881 atttgatggt tgtttgttag tggacagtaa aaaacgacac aaagtctttc aaaataatca
11941 agatggtttt gcaaaacttg tagtttggtg caatggccat ggagcaaatac ttactcattt
12001 atgtcttgaa gcaactagtt ggtatggaga agatttggct acttttatgc acgatttagg
12061 acataatgtc agtatagtaa acccagaaag cttttggcaa aagtgcagctg ctcagaaata
12121 agacagataa atcagatgca gctatgatag ctatgttttg tatcgccaac aaacctgctc
12181 tttggaagcc cattgcacct gaaatgaggc atttgagggc gttgcatgca atcgctaaaa
12241 gatgataagg tgcaacagac aaatcgcttg gaaaacaaaa atatgcattc cagttgcaaa
12301 gaagctatat cttaaagtaat tttggcaata gaggagcaaa ttattgttct cgaaaaagaa
12361 attaatgagc atataaataa ctatccacat ctaaaaaata tgggtgaaaaa ccttaagact
12421 ataaaaggta taggatattc tactgctggt gctgttgctg cagaaatgcc atcagttgat
12481 aactttgaca atgctaaaca atttacagct tttgctgcca ggacattatc aatcgggatc
12541 gtcagtaagt aagagaagtt gcatatgcaa aataggatct gagcgtattc gaaaagctct
12601 ttatatgcca gctatagtag tcaaaaacca taataatcat tttcaaaagt tttgtcagcg
12661 tctagcaagt aaaggcaaat gtccaaaagt catagtctct gcgttaatgc gaaaattaat
12721 gcatgtcttt tttggtattc ttaaaaagaa tcaaccattt aattgtaatt ttgttggata
12781 atttgtttga cagcagagac agtatctggg atctaaaatt tttatgtgaa accattatgt
12841 ttatatactt gtaggccccaa gttcctcaca tagtgaacaa aaaagtaaat gagattccag
12901 tgtcacgcgc tggaatgaca cctaccccat gagaactcta tttttcatac cactcattta
12961 taagtttatt gatatacagaa tctataaaat cctttaatgg ttgcctgatt tttatctcaa
13021 catttttagg gatgcaccta tctttacata tcgcataatt tatatgtgaag ttaagggtcaa
13081 tatacccttg atttaaaaaa atattcatct taaagggaaa taataccata tcctcatata
13141 cgttacttac aaacgtctct ctccctactt tatctttatg ttcctttgga ataggccagt
13201 gaatatttat atctgatgca ttacctttgt aactaataga cgtgggaagg ccaaaatctc
13261 caggatcttt ataatatatg tgccagcctg gttctactgt aacctttatt gcacctttaa
13321 gagtgaagct tgcttcattt atctcgccaa taagtaaatac aaattttgca atttcctcgt
13381 cagcatatag ttgagcgcaa gaaaaaaata aaaataatat taaatatata tatattttca
13441 ttaaggtaaa tttctccttt tatagagaaa gtgattttaga ttttaattat tacatttaat
13501 agcattatat agattattta ttaatatagc attatgctat agctaaactg acttacaaca
13561 atctgaaaaa cgacaaattc gtcattccgc tacttggttag cggaatctat gccgagatac
13621 cgcgaaatgaa tccacaactg tacgaacatt gtgatttttg ccataagga ggggtgtcatc
13681 ccagtgcctg aactgggat ccaggaattt tattaagttg gcaagcataa aaatagctgt
13741 tttttgttaa aatacaatgt cttgatgatt atggaaatgc tggattccag tgtcagct

```

```

//
LOCUS      JAQZAU010000110                15074 bp    dna        linear    ENV 17-MAR-2023
DEFINITION MAG: Wolbachia pipientis isolate wEsol contig_54614, whole genome
            shotgun sequence.
ACCESSION  JAQZAU010000110  JAQZAU010000000
VERSION    JAQZAU010000110.1
DBLINK     BioProject: PRJNA929258
            BioSample: SAMN33142973
KEYWORDS   WGS; ENV; Metagenome Assembled Genome; MAG.

```

SOURCE Wolbachia pipientis (insect metagenome)

ORGANISM Wolbachia pipientis  
Bacteria; Pseudomonadota; Alphaproteobacteria; Rickettsiales;  
Anaplasmataceae; Wolbachieae; Wolbachia.

REFERENCE 1 (bases 1 to 15074)

AUTHORS Fiutek,N., Couger,B.M., Roy,S., de la Torre,J.R. and Connor,E.F.

TITLE Genomic assessment of the contribution of the Wolbachia  
endosymbiont of Eurosta solidaginis to gall-induction

JOURNAL International Journal Molecular Sciences

REFERENCE 2 (bases 1 to 15074)

AUTHORS Fiutek,N., Couger,B.M., Roy,S., de la Torre,J.R. and Connor,E.F.

TITLE Direct Submission

JOURNAL Submitted (10-FEB-2023) Biology, San Francisco State University,  
1600 Holloway Ave, San Francisco, CA 94132, USA

COMMENT ##Genome-Assembly-Data-START##  
Assembly Date :: JUN-2019  
Assembly Method :: FLYE v. 06-2019  
Genome Representation :: Full  
Expected Final Version :: Yes  
Genome Coverage :: 100.0x  
Sequencing Technology :: Illumina HiSeq; PacBio Sequel  
##Genome-Assembly-Data-END##

FEATURES Location/Qualifiers

source 1..15074  
/organism="Wolbachia pipientis"  
/mol\_type="genomic DNA"  
/submitter\_seqid="contig\_54614"  
/isolate="wEsol"  
/isolation\_source="galls on Solidago altissima"  
/host="Eurosta solidaginis MN-2018-EFC"  
/db\_xref="taxon:955"  
/environmental\_sample  
/country="USA: Cowling Arboretum, Carleton College,  
Northfield, MN"  
/lat\_lon="44.48 N 93.13 W"  
/altitude="280 m"  
/collection\_date="2018-11"  
/metagenome\_source="insect metagenome"  
/note="metagenomic"

gene complement(47..715)  
/locus\_tag="wEsol\_01269"

CDS complement(47..715)  
/locus\_tag="wEsol\_01269"  
/codon\_start=1  
/transl\_table=11  
/pfam="DDE\_Tnp\_1"  
/fullproduct="qcoverage 100 , hcoverage 100 , similarity  
99.5 , identity 99.1 , evalue 1.63e-152 , alnlength 222 ,  
Bacteria , Proteobacteria , EAL59206.1 transposase, IS4  
family [Wolbachia endosymbiont of Drosophila ananassae]"  
/translation="MNKITCLSKKLKEFFNEKAEKISITTRFIKRKRKLKGSSFVKAM  
VLGNIGVDNCSVETMCQLLNEDSIDITKQGLDFRFTTEEAVEFMKRMYNESVILFKNIL  
QVDCKILQQFNSVKLLDSSYITLPNSMEEMYKGYGTSYSGYESNTKSGIKLQLVFDYM  
NQIIDQLNLTEGIRSDQGYRKHLNLISSNDLLISDLGYFVPSSFKQINEIGAYFISRR  
YQRI"  
/product="transposase, IS4 family"  
/besthit="qcoverage 100 , hcoverage 100 , similarity 99.5  
 , identity 99.1 , evalue 1.63e-152 , alnlength 222 ,  
Bacteria , Proteobacteria , EAL59206.1 transposase, IS4  
family [Wolbachia endosymbiont of Drosophila ananassae]"

```

gene      complement(894..2174)
          /locus_tag="wEsol_01270"
CDS       complement(894..2174)
          /locus_tag="wEsol_01270"
          /codon_start=1
          /transl_table=11
          /fullproduct="qcoverage 100 , hcoverage 100 , similarity
99.8 , identity 99.8 , evalue 2.79e-308 , alnlength 426 ,
Bacteria , Proteobacteria , WP_015588834.1 MULTISPECIES:
flavodoxin-dependent
(E)-4-hydroxy-3-methylbut-2-enyl-diphosphate synthase
[unclassified Wolbachia]"
          /cog="gcpE COG0821 361 1-hydroxy-2-methyl-2-(e)-butenyl
4-diphosphate synthase"
          /pfam="GcpE"
          /tigr="TIGR00612 ispG_gcpE 357
4-hydroxy-3-methylbut-2-en-1-yl diphosphate synthase"
          /product="
flavodoxin-dependent
(E)-4-hydroxy-3-methylbut-2-enyl-diphosphate synthase"
          /translation="MLDKDLILNDDAYELLPISRHKTHVVEVGKVKIGGNNPVVVQSM
ALGVHIDSDNIKSSAKHYAKEITELAHTGSELVRIALNSEEVARAIPYIVEEINKEGF
DGKILVGCQYELDKLVQDYPDNKMLGKIRINPGNIGFGNKRDEKFERVIEYAIMHD
LPVRIGVNWGSLDKYLLQKLMDENSSLSNSRPSDVILRKALVMSALDSAKKAEIIGLN
SNKIIISCKVSKVQDLILVYMALAKSSNYALHLGLTEAGMGNGKGVVNTAAGLIYLLQN
GIGDTIRASLTQRPGESRTNEVVVCQEILQSIGLRYFNPQVNSCPGCGRTSSDRFRIL
TEEVNGYIKTHIPIWKKKNPGVEHMSIAVMGCIVNGPGESKHANLGISLPGYGEKPV
AVYKDGKYFKTLQGDNVSEEFKAIIDNYVKEHYT"
          /besthit="qcoverage 100 , hcoverage 100 , similarity 99.8
, identity 99.8 , evalue 2.79e-308 , alnlength 426 ,
Bacteria , Proteobacteria , WP_015588834.1 MULTISPECIES:
flavodoxin-dependent
(E)-4-hydroxy-3-methylbut-2-enyl-diphosphate synthase
[unclassified Wolbachia]"
gene      complement(2200..2820)
          /locus_tag="wEsol_01271"
CDS       complement(2200..2820)
          /locus_tag="wEsol_01271"
          /codon_start=1
          /transl_table=11
          /fullproduct="qcoverage 100 , hcoverage 100 , similarity
100 , identity 100 , evalue 3.69e-132 , alnlength 206 ,
Bacteria , Proteobacteria , WP_015588833.1 MULTISPECIES:
TRP75-related protein [unclassified Wolbachia]"
          /translation="MLRIFSKVLFLMFLVSSFFT VHSAEAKSKLSKRYIPPGNPGGA
SFHTDEDFAESYKLYEKRRRELLKKKKSQDRAINKEDELIKKLKEKKIASLDNEPNDMEA
CIVDDEESAMINQHGINIARLRGAVFIDQEPVFQYENKQHESEQQEEKKVTSTREKKV
SPMNITIKKTPSRKTCSHDSIANLDNVDAYS LNGLSSSFGSVADTVK"
          /product="TRP75-related
protein"
          /besthit="qcoverage 100 , hcoverage 100 , similarity 100
, identity 100 , evalue 3.69e-132 , alnlength 206 ,
Bacteria , Proteobacteria , WP_015588833.1 MULTISPECIES:
TRP75-related protein [unclassified Wolbachia]"
gene      complement(3018..3566)
          /locus_tag="wEsol_01272"
CDS       complement(3018..3566)
          /locus_tag="wEsol_01272"
          /codon_start=1
          /transl_table=11

```

```

/pfam="Pfam-B_752 Pfam-B_10393 Pfam-B_13857 Pfam-B_2765
Pfam-B_10583 p25-alpha Baculo_PEP_C ETRAMP Pfam-B_5139"
/fullproduct="qcoverage 100 , hcoverage 100 , similarity
100 , identity 100 , evalue 7.37e-86 , alnlength 182 ,
Bacteria , Proteobacteria , WP_141456782.1 hypothetical
protein [Wolbachia endosymbiont of Carposina sasakii]"
/translation="MSNVFSNAWYSLSGNDRDLITALQKSQKIDAEQFEKVFGALKEW
QEAQKIDAKQFEEVFSALKEWQEAQKIDAEQFEKVFSALDKIGTEQFQAMQEHLNGL
QEKVETLAEAVADQEKTLICTIATAVAVIAITSFVAFCIYQGVKCEREKEKNLSKDT
PDTKLNDKVDVTQVQQNSLYTPN"
/product="hypothetical protein"
/besthit="qcoverage 100 , hcoverage 100 , similarity 100
, identity 100 , evalue 7.37e-86 , alnlength 182 ,
Bacteria , Proteobacteria , WP_141456782.1 hypothetical
protein [Wolbachia endosymbiont of Carposina sasakii]"
gene complement(3769..4620)
/locus_tag="wEsol_01273"
CDS complement(3769..4620)
/locus_tag="wEsol_01273"
/codon_start=1
/transl_table=11
/fullproduct="qcoverage 100 , hcoverage 100 , similarity
100 , identity 100 , evalue 1.64e-196 , alnlength 283 ,
Bacteria , Proteobacteria , WP_015588831.1 MULTISPECIES:
Rpn family recombination-promoting nuclease/putative
transposase [unclassified Wolbachia]"
/pfam="PDDEXK_2"
/tigr="TIGR01784 T_den_put_tspse 273 conserved
hypothetical protein"
/product="Rpn family
recombination-promoting nuclease/putative transposase"
/translation="MALSKFLDPKLDLTFKKIFGTEKNKNILIHFLNDILGCTEVNTI
QEVEFLSTIMDPEIASDRQSIQVLDVLCRDSSSGSRYIIEMQLARDKGFEKRAQLYAAKAY
SRQADKNYINLKKVFFIAISNGMLFPPEEVEYISTHNIRDIKTNGHYLKDFQFVFIELP
KFSKSRVEELESTIERWCFFFKHAEETTTDEDLKKIAEESPIIKLAYDELDFHWSEKD
LLAYEERVMDLQKEEAILEYRLDLAAEEKGVRKGKIEVVKAMLANNVDVNTIVKFTGLS
MSEIKEL"
/besthit="qcoverage 100 , hcoverage 100 , similarity 100
, identity 100 , evalue 1.64e-196 , alnlength 283 ,
Bacteria , Proteobacteria , WP_015588831.1 MULTISPECIES:
Rpn family recombination-promoting nuclease/putative
transposase [unclassified Wolbachia]"
gene complement(4802..6916)
/locus_tag="wEsol_01274"
CDS complement(4802..6916)
/locus_tag="wEsol_01274"
/codon_start=1
/transl_table=11
/fullproduct="qcoverage 100 , hcoverage 100 , similarity
100 , identity 100 , evalue 0.0 , alnlength 704 ,
Bacteria , Proteobacteria , WP_141456784.1 MULTISPECIES:
DNA translocase FtsK [unclassified Wolbachia]"
/cog="FtsK COG1674 858 DNA segregation ATPase
FtsK/SpoIIIE and related proteins"
/pfam="DUF4117 T2SE FtsK_SpoIIIE DUF87 TrwB_AAD_bind
AAA_10 AAA_10 Ftsk_gamma"
/product="DNA translocase
FtsK"
/translation="MLKKYLKSAIYLSLLIYIYISVFSYNYKDPSLNTATNEEVNTLG
GIVSSYLADILVQFLGLTSVTIATTIVYLLIFRPSKRLKILYLILINLGICAILPQL

```

```

SLGITARYRHSGIIGNALINNCPPFYIFVIVTSIGLVGSGVGWKRTIYSLFFLCKKIACL
FVNVPFFFRSHKTTEYSIAPLVVEEKHRTKITTKQQPKERQKKATEEVLSEFKFPSIHL
LSKAEESLQRKQLNEMESNKNLSLLEQVLSDFGVQGKIIISVCYGPVVTLYKLEPQAGT
KSARVIGLADDIARSMASARSISIRGQNAMGIELPNKEREIVMLRDLLESPEYQNA
NLNLPIALGKEISGKPVADLTMPHLLVAGTTGSGKSVAINTMILSLVYRLSPDECK
MIMIDPKMLELSIYDAIPHLITPVVTEPKKAVVALKWIVKEMENRYRMMSYLNVRNVI
NYNQRITEAMNSGIELERVVQIGFNSTTGKPLFEKLPKIMETFPYIVVIVDEMADLML
VAGKEIECSIQRLAQMARAGIHIIMATQRPVSVDVITGVIKANFPTRISFAVTSKIDS
RTILGEQGAEQLLGMGDMLYMASGGKIIRIHGPFVSDDEVQDIVDHLKMQGEPNYMEE
ITKEDENSSVESEGETEDEENDLYNQAVAIIQRDQKVSTSYIQRQLRIGYNRAANIVE
RMEKEGVVSAPNYSKGREILVE"
/besthit="qcoverage 100 , hcoverage 100 , similarity 100
, identity 100 , evaluate 0.0 , alnlength 704 , Bacteria ,
Proteobacteria , WP_141456784.1 MULTISPECIES: DNA
translocase FtsK [unclassified Wolbachia]"
gene complement(7367..7642)
/locus_tag="wEsol_01275"
CDS complement(7367..7642)
/locus_tag="wEsol_01275"
/codon_start=1
/transl_table=11
/fullproduct="qcoverage 100 , hcoverage 100 , similarity
100 , identity 100 , evaluate 1.21e-59 , alnlength 91 ,
Bacteria , Proteobacteria , WP_015588829.1 MULTISPECIES:
type II toxin-antitoxin system RelE/ParE family toxin
[Wolbachia]"
/cog="RelE COG2026 90 Cytotoxic translational repressor
of toxin-antitoxin stability system"
/pfam="Plasmid_stabil"
/tigr="TIGR02385 RelE_StbE 88 addiction module toxin,
RelE/StbE family"
/product="type II
toxin-antitoxin system RelE/ParE family toxin"
/translation="MGLERYKVKSLKSVEKDLPNLPKTIRLRVQKAIKERLTVDPIN
FGEPLHHNLKGCRRLRVGDYRVIYRVNQLDHIVTITEIGHRDDIYKK"
/besthit="qcoverage 100 , hcoverage 100 , similarity 100
, identity 100 , evaluate 1.21e-59 , alnlength 91 ,
Bacteria , Proteobacteria , WP_015588829.1 MULTISPECIES:
type II toxin-antitoxin system RelE/ParE family toxin
[Wolbachia]"
gene complement(7633..7854)
/locus_tag="wEsol_01276"
CDS complement(7633..7854)
/locus_tag="wEsol_01276"
/codon_start=1
/transl_table=11
/fullproduct="qcoverage 100 , hcoverage 100 , similarity
100 , identity 100 , evaluate 5.69e-41 , alnlength 73 ,
Bacteria , Proteobacteria , WP_006279415.1 MULTISPECIES:
hypothetical protein [Wolbachia]"
/translation="MANSGINIALSEETLKHLEAELSEFTKQPVQELAGKLFREAVELE
MEDFLVSKISDERDVEGAETVDFEDIKWD"
/product="hypothetical protein"
/besthit="qcoverage 100 , hcoverage 100 , similarity 100
, identity 100 , evaluate 5.69e-41 , alnlength 73 ,
Bacteria , Proteobacteria , WP_006279415.1 MULTISPECIES:
hypothetical protein [Wolbachia]"
gene complement(8060..8497)
/locus_tag="wEsol_01277"
CDS complement(8060..8497)

```

```

/locus_tag="wEsol_01277"
/codon_start=1
/transl_table=11
/fullproduct="qcoverage 100 , hcoverage 100 , similarity
100 , identity 100 , evalue 1.68e-96 , alnlength 145 ,
Bacteria , Proteobacteria , WP_006279412.1 MULTISPECIES:
ClpXP protease specificity-enhancing factor SspB
[Wolbachia]"
/cog="COG3814 COG3814 157 Uncharacterized protein
conserved in bacteria"
/pfam="SspB"
/product="ClpXP protease
specificity-enhancing factor SspB"
/translation="MEQTDYKKLLNSAKFQVIKKTLDVISGNFIPHLEILFFTYFNG
VTMPDRLKKSYPQMLIILQHGFYDLKVSSEDKFSVLSFQKGQERITIPFFAISEFRD
KISGDVLIFDKISIDSDKEYKSEKCTEKLNSGSIISIDQLRDE"
/besthit="qcoverage 100 , hcoverage 100 , similarity 100
, identity 100 , evalue 1.68e-96 , alnlength 145 ,
Bacteria , Proteobacteria , WP_006279412.1 MULTISPECIES:
ClpXP protease specificity-enhancing factor SspB
[Wolbachia]"
gene complement(8975..9565)
/locus_tag="wEsol_01278"
CDS complement(8975..9565)
/locus_tag="wEsol_01278"
/codon_start=1
/transl_table=11
/pfam="Colicin_V"
/fullproduct="qcoverage 100 , hcoverage 100 , similarity
99.5 , identity 99.5 , evalue 2.52e-125 , alnlength 196 ,
Bacteria , Proteobacteria , WP_015588828.1 MULTISPECIES:
CvpA family protein [Wolbachia]"
/translation="MLFDSLIIIFIVVLCVVIISVTRGFIKELCALMFLFLSVFLTANHY
DFFTPNYSKYFDSKVTLNILSTISVFIIILNLIFMIINNWLMIYILLPIRLGFIDRVGTI
FLGVLKGILLSYVLFFTVHLYCYTVYDKKEGEYKIEAEDILPNWIINSHSYQALFVTA
EEVIDMYVPESLILKIKEIGGEMVDQEKPKNNKKEE"
/product="CvpA family
protein"
/besthit="qcoverage 100 , hcoverage 100 , similarity 99.5
, identity 99.5 , evalue 2.52e-125 , alnlength 196 ,
Bacteria , Proteobacteria , WP_015588828.1 MULTISPECIES:
CvpA family protein [Wolbachia]"
gene complement(9623..10219)
/locus_tag="wEsol_01279"
CDS complement(9623..10219)
/locus_tag="wEsol_01279"
/codon_start=1
/transl_table=11
/fullproduct="qcoverage 100 , hcoverage 100 , similarity
100 , identity 100 , evalue 1.08e-136 , alnlength 198 ,
Bacteria , Proteobacteria , WP_012673066.1 MULTISPECIES:
riboflavin synthase [Wolbachia]"
/cog="RibC COG0307 204 Riboflavin synthase alpha chain"
/pfam="Lum_binding Lum_binding"
/tigr="TIGR00187 ribE 207 riboflavin synthase, alpha
subunit"
/product="riboflavin
synthase"
/translation="MFKGIITDIGTITDTTTHSNSDQIFHIKTQNLSSINKGDSIACS
GVCLTVVDIMSDTFTVQASQETMKVANLNTWRIGKKINLEQAMRLSDKIDGHLVQGHV

```

```

gene      DGIVKFLTINQNLDSEIKLSCPQELIKFVAKKSSVTL DGVSLTVNSVVNQEFTVNIT
          PYTWENTTFQYNKVNDYLNLEIDMIARYLDQLMQHKYN"
          /besthit="qcoverage 100 , hcoverage 100 , similarity 100
          , identity 100 , eval 1.08e-136 , alnlength 198 ,
          Bacteria , Proteobacteria , WP_012673066.1 MULTISPECIES:
          riboflavin synthase [Wolbachia]"
CDS       complement(10401..12128)
          /locus_tag="wEsol_01280"
          complement(10401..12128)
          /locus_tag="wEsol_01280"
          /codon_start=1
          /transl_table=11
          /fullproduct="qcoverage 100 , hcoverage 100 , similarity
          99.8 , identity 99.7 , eval 0.0 , alnlength 575 ,
          Bacteria , Proteobacteria , WP_015588827.1 MULTISPECIES:
          hypothetical protein [unclassified Wolbachia]"
          /translation="MHNSNTETKNKYKIEDLPKLFKEKSRNISKAFSSETIKISAIRS
          RSIESNIQKFSFELTATDKDTFNIRLFRINPLIDFFKICLSREKKFTANIKVPKESSE
          LYNNYCKTNSYKTVEEFVNSAPPQILLQGTITLQTDVENINLDNLYQIELFLNEKLQ
          HAEKTENEDKKEQSETNQKNAQNQKQIVPVTGSFGFDVTNNGKQVTRVSIVVAAMHENV
          FWFRSFFCLPNFFNTSQFFSQQLPKFSIQSNNIPFGVIPAFDQEKRNMDPSSQATRMT
          GGSIENTPIQAEQNVGQTTSHTEYFKANRKKSKKQSQELPEEEKQSTIKQARN DARV
          AVIDNKIEHRGKKLDKIFIEVMSGYKNQDPETFCNIFSSVFNIVYFQDKQLHAILEPG
          EISEVLQILERPQPLSNSLLGKEYLQKQVYRKKEQLLKL VSGVYIQQPSPQHENTPHK
          STNPLPIKDLSPATNEAKTLPPTNITLKSPLKTVFSSKKAYFCLFIIVASASTLCLWH
          FPLGKVSMLKGLVLPEKRESIGLALNIGLPILIALCILNLARFIYSEYSIESIKQVSE
          NDPLSRAYS"
          /product="hypothetical protein"
          /besthit="qcoverage 100 , hcoverage 100 , similarity 99.8
          , identity 99.7 , eval 0.0 , alnlength 575 , Bacteria ,
          Proteobacteria , WP_015588827.1 MULTISPECIES:
          hypothetical protein [unclassified Wolbachia]"
gene      12275..13318
          /locus_tag="wEsol_01281"
CDS       12275..13318
          /locus_tag="wEsol_01281"
          /codon_start=1
          /transl_table=11
          /fullproduct="qcoverage 100 , hcoverage 100 , similarity
          100 , identity 99.7 , eval 1.09e-249 , alnlength 347 ,
          Bacteria , Proteobacteria , WP_015588826.1 MULTISPECIES:
          phenylalanine--tRNA ligase subunit alpha [unclassified
          Wolbachia]"
          /cog="PheS COG0016 335 Phenylalanyl-tRNA synthetase alpha
          subunit"
          /pfam="Phe_tRNA-synt_N tRNA-synt_2d tRNA-synt_2b"
          /tigr="TIGR00468 pheS 324 phenylalanine--tRNA ligase,
          alpha subunit"
          /product="
          phenylalanine--tRNA ligase subunit alpha"
          /translation="MNKELLDEILSLEDKAVSEIENASSLQDLEKVRLLYLGKKGVVR
          AYFDNLKKIENAEKKRDLGAVINALRDKIDHLIMNRENVLKTEEVNFKLQNEAVDITL
          PVRPEKMGKVHPLSKVINEVKLIFAHMGFKAVDGPDIEDEFHVFDALNTPSHHPAREE
          QDTFYLNKIDDKRMVLRTHHTSSVQIRTMEKTKKFPIKIVAAGRVRNDFDATHTPMF
          HQIEGLYVDENVNMGQLKFTIHHFLNKF FGDKGLKIRFRNSFFPFTEPSAEVDISYKG
          SKWIEVLGCGMTHPNVFNQVNGIDHTKYNGFAFGIGIERLAMLKYQISDLRSFYDNKIS
          WLDHYGFHFSSLR"
          /besthit="qcoverage 100 , hcoverage 100 , similarity 100
          , identity 99.7 , eval 1.09e-249 , alnlength 347 ,
          Bacteria , Proteobacteria , WP_015588826.1 MULTISPECIES:

```

```

phenylalanine--tRNA ligase subunit alpha [unclassified
Wolbachia]"
gene      13319..14224
          /locus_tag="wEsol_01282"
CDS       13319..14224
          /locus_tag="wEsol_01282"
          /codon_start=1
          /transl_table=11
          /fullproduct="qcoverage 100 , hcoverage 100 , similarity
96.0 , identity 93.7 , evaluate 2.05e-199 , alnlength 301 ,
Bacteria , Proteobacteria , EAL59043.1
UDP-N-acetylglucosamine pyrophosphorylase [Wolbachia
endosymbiont of Drosophila ananassae]"
          /cog="GlmU COG1207 460 N-acetylglucosamine-1-phosphate
uridyltransferase (contains nucleotidyltransferase and
I-patch acetyltransferase domains)"
          /pfam="IspD NTP_transf_3 NTP_transferase CTP_transf_3"
          /tigr="TIGR01173 glmU 452 UDP-N-acetylglucosamine
diphosphorylase/glucosamine-1-phosphate
N-acetyltransferase"
          /product="UDP-N-acetylglucosamine
pyrophosphorylase"
          /translation="MISKTHTFVILAAGHGRRMNSDLPKVLHKIGSFSMLQHVIYNAK
QLNPENIAVVVDQPLIERLKCCKDIQLITQELTLGTGDAVKTAMRNLRELDPSSIVVV
QYGDTPLIKSSITKMISSYLEGKALVCLGFRSTNKEYGRLIIENGSLREIVEAKSDKN
NHEEFLANAGIMVACAKNLRELVEKIECNSSTHEYLYLTDIVSIAVKSNNLVGYVITGG
EEATGINNRNDLIKAIFYFQENKRKVFTDSGVTLVAPETVFFSLDTQIARDSVIYPYV
FFRYWSENRVWCENTAIFAFRKLLN"
          /besthit="qcoverage 100 , hcoverage 100 , similarity 96.0
, identity 93.7 , evaluate 2.05e-199 , alnlength 301 ,
Bacteria , Proteobacteria , EAL59043.1
UDP-N-acetylglucosamine pyrophosphorylase [Wolbachia
endosymbiont of Drosophila ananassae]"
gene      14163..14612
          /locus_tag="wEsol_01283"
CDS       14163..14612
          /locus_tag="wEsol_01283"
          /codon_start=1
          /transl_table=11
          /fullproduct="qcoverage 100 , hcoverage 83.2402234636871
, similarity 100 , identity 99.3 , evaluate 6.61e-98 ,
alnlength 149 , Bacteria , Proteobacteria , EAL59044.1
UDP-N-acetylglucosamine pyrophosphorylase [Wolbachia
endosymbiont of Drosophila ananassae]"
          /cog="GlmU COG1207 460 N-acetylglucosamine-1-phosphate
uridyltransferase (contains nucleotidyltransferase and
I-patch acetyltransferase domains)"
          /pfam="Hexapep Pfam-B_411 Pfam-B_10572 Hexapep Hexapep
Pfam-B_54 Hexapep"
          /tigr="TIGR01173 glmU 452 UDP-N-acetylglucosamine
diphosphorylase/glucosamine-1-phosphate
N-acetyltransferase"
          /product="UDP-N-acetylglucosamine
pyrophosphorylase"
          /translation="MKIESGAKILPFSHLENCLIKSNAEVGPFTRIRGNTTIGNKAKI
GNFVEVKTSEVGQNTRIKHLSYIGNAKVGQESNIGAGTIVCNVDGKNKHETNIGSNCF
VGANSSLIAPLNIHDESVIAAGSVIVEDVPEKSLAIAREKQVTKRIK"
          /besthit="qcoverage 100 , hcoverage 83.2402234636871 ,
similarity 100 , identity 99.3 , evaluate 6.61e-98 ,
alnlength 149 , Bacteria , Proteobacteria , EAL59044.1

```

UDP-N-acetylglucosamine pyrophosphorylase [Wolbachia  
endosymbiont of *Drosophila ananassae*]"

ORIGIN

```

1 aatctctaaa cattctaata actccatttt ttgatttggt tctacatcat atacgttggt
61 atcgacgact tatgaaataa gtccttattt cattgatttg tttaaaagaa cttggcacaa
121 aataaccgag atcagatatt agcaaatacat tgcttgatat attacttaaa tgtttcctat
181 atccctgggtc tgatcttatt ccctccgtta aattaagttg gtctattatc tgattcatgt
241 aatcgaaaac taattgtaac tttattccag acttagtatt gctttcatag ccactgtagc
301 tagtaccata acctttatac atctcttcca tactgttagg tagagtaata tagctactgt
361 ccaataattht aacactatta aattgctgta agattttgca atcaacttgc aagatatttt
421 taaagagaat cacagattca ttatacatcc ttttcataaa ttccactgct tcttcagtaa
481 atctaaaatc caaaccttgt tttgttatat ctatcgagtc ctcgtttagt aattgacaca
541 ttgtttctac gctacaatta tcaactccta tattaccaa gaccatggct tttacgaatg
601 atgaaccttt tagctttctc tttcttttta taaaccttgt tgtaattgag attttctctg
661 ctttttcatt aaaaaattct ttgagctttt ttgataagca agttatttta ttcattgggt
721 ctctcactaa aagtatatct gggagaactt ataccttatt attctatctc tttcatacct
781 ttatttcctt aacttgacgc atatgctttt ttgaacattc ccaacgaaaa aagaaaaaca
841 aggtctaatt ttctttttta tttgcgattt atctattaat taaccgtgaa aggttacgtg
901 taatgctcct tcacataaatt atcaataaatt gccttaaatt cttcagagac attatcacct
961 tgtaaagttt tgaaataattt gccgtctttg tagactgctg aaacagggtt ttctccatat
1021 ccaggcaagc tgattcccaa atttgcggtg ttgctttctc caggaccgtt tactatgcat
1081 ccataacag caatgctcat atgctctaca cctggatttt tttcttcca tatcgggata
1141 tgagttttta tatagccatt cacctcttca gttaatatac gaaaacgacg gctactcgtg
1201 cgccacaaac caggacatga attaacctga gggttaaagt atcgcaagcc tatagactgc
1261 aatatttcct gacacaccac cacttcatta gtacgcgatt caccaggacg ttgagtcaaa
1321 gaagcccgtg ttgtatctcc aatgccattt tgcaataaat aaataagccc tgctgcggta
1381 ttaccacac ctttattgcc cataccagcc tcagttaaac ccaaatagcag cgcataattg
1441 gaagattttg caagtgccat ataaactaaa attaaatctt gtactttgct aactttacat
1501 gaaatgatta ttttgtttga atttagacca atttcttcag ctttttttgc actatcaaga
1561 gcagacatta caagtgcttt gcgcagtata acgtcagaag gccttgaatt actaagcgaa
1621 gagttttcat ccatcaattt ttgcaaaagg tatttatcaa gactacccca atttacccca
1681 attctaaccg gaagatcgtg cattattgca tactctataa ccctttcaaa cttctcatca
1741 cgtttgttgc caaaacctat attgcctggg tttatcctaa ttttaccag cattttgatg
1801 ttgtctggat aatcttgaac taatttatct agctcatact gaccacagcc taccaatatt
1861 ttaccgtcaa aaccttcttt atttatctct tctactatat aagggtattg tcttgctacc
1921 tcctctgagt tcaaggcaat tcgcaccaat tctgaacctg tatgcgctag ttctgttacc
1981 tcttttgcat aatgttttgc gctacttttt atattatcag aatctatatg cacgccaagc
2041 gccatagatt gtacaactac aggattattt ccacctatct ttacttttcc aacttctaca
2101 acatgagtct tgtgcctgga aatcggcaat aattcatatg catcatcatt caatatcagg
2161 tctttatcta gcatattatt aatggccaat attgtgatac tattttactg tgtcagctac
2221 actgccaat gaactcgaac cattcaaact ataagcatct acgttatcca aattagcaat
2281 agaatcatgt gagcatgttt ttcttgatgg agtttttttt atagtatat tcataggaga
2341 aacttttttt tctcgtgttg aagtaacttt cttctcttct tgttgttcac tttcatgctg
2401 cttattttca tactggaaaa ctggctcttg atctataaat acagcacccc ttaaagcgcg
2461 gatattaata ccatgctgat ttatcatagc gctctcttca tcgtcgacta tgcacgcttc
2521 catgtcattt ggctcattat caagactagc aatttttttc tcttttaatt ttttgattag
2581 atcttcttta tttatagctc gatcttgtga ctttttttcc ttgagcaatt ccctacgctt
2641 ttcatatagc ttatatgact cagcaaaatc ctcatctgta tgaaagcttg caccaccagg
2701 gttaccagga ggtatgtatc tcttactgag cttagattta gcttcagcac tatgcacagt
2761 aaaaaagcta gaaacaaaaa acattaatat aaacaagact ttagaaaaaa tcctaagcat
2821 atggtgctat agtaaatatc gtgtttttaa agatagcaat taacaaactt taagtaaacc
2881 agaactttta ctaactttac aatacaataa tttttctaaa aagtgatatg tttactatca
2941 aaaaatctac ataggctaag agaagaggaa ggtgttacia gttgcgtaac accttttcaa
3001 gaaaagtgtt atacaactta gtttgaggtg tataagctat tctgttgcac ttgagtatca
3061 actttatcat taagttttgt gtctggcgta tcttttagaca agttcttttc tttctccctt
3121 tcacacttaa ctccctgata gatacagaat gcaacaaaac tagttatcgc tattacggca
3181 acagcagtgg ctatggtaca aattagtagt gttttttctt gatctgctac tgcctctgca
3241 agtgtttcca ctttttcttg tagaccgttt aagtgtctct gcatagcttg aaactgctca
3301 gtaccaatct tgtcttctaa tgcactaaaa actttttcaa actgctcagc atctatcttt
3361 tgagcttctt gccattcttt taatgcacta aatacctctt caaactgttt agcatctatc

```

|      |             |             |             |             |             |            |
|------|-------------|-------------|-------------|-------------|-------------|------------|
| 3421 | ttttgagctt  | cttgccattc  | ttttaatgca  | ccaaaaactt  | tttcaaactg  | ctcagcatcg |
| 3481 | atTTTTtgac  | TTTTTtGcaa  | tgctgttata  | tctaacctat  | cattgccaga  | caaactatac |
| 3541 | caagcattac  | taaaaacatt  | tgacatttta  | accccctagt  | taattaatat  | attataatTT |
| 3601 | tacattccca  | atgtttaaat  | tattattaaa  | ttaactgtca  | ttatgtattg  | accttttaat |
| 3661 | aattttgttt  | gacttgcttt  | ttaaaagtgc  | gaaaacttaa  | attaaggtac  | ttacgaaata |
| 3721 | catgaagaaa  | aatgcttatt  | gtatttttgt  | aaccattaac  | acttaattct  | acaattcttt |
| 3781 | gatctcactc  | atggagaggc  | cagtaaactt  | aacaatagtg  | ttgacatcaa  | cattattagc |
| 3841 | tagcattgct  | tttacgactt  | caatttttcc  | tttccgtaca  | cctttctctt  | cagcaagatc |
| 3901 | aagtctgtat  | tcaaggatag  | cttcttcttt  | ctgtagatcc  | atcactcttt  | cttcataagc |
| 3961 | taggagatct  | ttttcactcc  | agtgaactt   | gtctaattca  | tcgtatgcta  | gctttattat |
| 4021 | tggtgattcc  | tctgcaatTT  | tcttttagatc | ttcatctgtc  | gtttcttctg  | catgcttaaa |
| 4081 | aaagaagcac  | cacctttcta  | ttgtgctttc  | tagttcctcc  | actctgcttt  | ttgaaaatTT |
| 4141 | aggtaatTct  | ataaagacaa  | attgaaaatc  | ttttaagtaa  | tggccgttgg  | tttttatatc |
| 4201 | acgtatatTg  | tgagtagaaa  | tatactcaac  | ctcttcaggg  | aatagcatac  | cattggaaat |
| 4261 | agcaatgaag  | aaaaccttct  | ttaaattaat  | gtaattttta  | tcagcctgcc  | ttgagtaagc |
| 4321 | cttagcagca  | tagagtTgtg  | cgcgcttttc  | aaagcccttg  | tcgcgagcga  | gctgcatctc |
| 4381 | aattatatat  | cttgaccac   | tagaatccct  | gcaaagaaca  | tcaactatac  | tttgtctatc |
| 4441 | agaggcaatt  | tcagggtcca  | taatggTgct  | taagaattct  | acttcttgta  | tagtattgac |
| 4501 | ttcagtacat  | cctaaaatat  | catttaaaaa  | atggataaga  | atattcttat  | ttttttcagt |
| 4561 | accaaagatt  | ttcttaaatg  | ttaaactctaa | ctttggatcg  | agaaatTtag  | aaagagccat |
| 4621 | ggcaagaatg  | cttgaaaata  | ttaataatta  | tacactatta  | ttaacaatta  | ttcaattata |
| 4681 | tttttaagga  | agacaacttt  | taactttgta  | aaagatagcc  | aagaaagtTg  | catttgCagc |
| 4741 | aaatttttaag | atacccatct  | atggcctaac  | ttaacgcgca  | tgaacgtTct  | cagaagccct |
| 4801 | gttattctac  | taatatctct  | ctctttcctg  | aataattTgg  | agcactgaca  | acaccttctt |
| 4861 | tttccattct  | ttcaacgatg  | tttgCagctc  | tgttatagcc  | tattctaagt  | tgtcgctgaa |
| 4921 | tgtaactggT  | tgaaactttt  | tgatctcttt  | gaatgatggc  | cactgcttga  | ttgtagaggt |
| 4981 | cgttttcttc  | atcctctgtt  | tcaccttctg  | attccacaga  | agaatTttca  | tcttctttgg |
| 5041 | taattttcctc | catataatTT  | ggctcacctt  | gcattttcag  | atgatcaact  | atatcttgta |
| 5101 | cctcatcatc  | gctcacaaat  | gggccgtgaa  | ttcgaataat  | cttaccacca  | gaggccatat |
| 5161 | aaagcatatc  | acccatacca  | agcaattgtt  | cagccccttg  | ttcgccaagt  | attgtgCgac |
| 5221 | tatctatctt  | agaagtaaca  | gcaaaactga  | ttctcgTtgg  | aaagtTcgcc  | tttatcacac |
| 5281 | ctgtgatcac  | atccacagat  | gggcgtTgtg  | ttgccattat  | gatgtgtatt  | cctgcagcac |
| 5341 | gagccatctg  | agctaagcgt  | tgaatagagc  | actctatttc  | tttgccggca  | acaagcatca |
| 5401 | aatctgccat  | ttcatctaca  | atcactacaa  | tatatgggaa  | tgtttccatt  | ttaatcggca |
| 5461 | gctttttcaaa | caaaggTttg  | cctgtTgttg  | agttaaaagcc | aatctgcaca  | acgcgctcca |
| 5521 | attctattcc  | actattcatc  | gcttctgtga  | ttctttggTt  | atagTttatt  | acattgCgca |
| 5581 | catttaaaata | ggacatcatg  | cgatagcggT  | tttccatctc  | ttttactatc  | cacttaagag |
| 5641 | cgactacagc  | cttttttggc  | tctgttacca  | ctggcgTtat  | tagatgcggT  | attgcatcat |
| 5701 | atattgaaag  | ctcaagcatt  | tttggtgcga  | tcattatcat  | cttacattca  | tcaggactta |
| 5761 | atcgataaac  | gagtgaaga   | atcatagtgt  | taatcgcaac  | tgatttacca  | gaccctgtgg |
| 5821 | ttccagcaac  | gagcaagtgg  | ggcattTttag | ttagatctgc  | aataactggT  | tttccactta |
| 5881 | tttctttggc  | aagcgcaatt  | gggagattTta | agTttgcatt  | ttggTattct  | ggggattcaa |
| 5941 | gcaaatcacg  | cagcattaca  | atttcccgtt  | ccttgTtcgg  | caactctatt  | cccatagcat |
| 6001 | tttgcccacg  | aattattgaa  | atacgtgcag  | agagtgcact  | catcgaacgt  | gcaatgtcat |
| 6061 | ctgcaaggcc  | aattactctt  | gcagattTtcg | tgccagcttg  | tggttcaagt  | ttgtacaaag |
| 6121 | tcacaaccgg  | cccatagcat  | acactgataa  | tttttccttg  | cacgcaaaa   | tcactcagga |
| 6181 | cttgTttccag | cagagataaa  | tttttattgc  | tctccatttc  | attcagctgc  | tttctctgca |
| 6241 | aagactcctc  | tgtctttagaa | agttaaTgga  | tacttggaaa  | cttaaaactca | cttaaaacct |
| 6301 | cctcggtage  | ttttttctgt  | ctttctttttg | gttgTtgTtt  | agtagtgatt  | ttagTtctat |
| 6361 | gtttttcttc  | tactactaat  | ggtgcaattg  | aatactcagt  | agTtttatgt  | gatctgaaga |
| 6421 | atggaacatt  | tacaaataag  | caagctattt  | ttttacataa  | gaagaataga  | gagtaaattg |
| 6481 | ttctcttcca  | accaacagat  | cctacaagac  | ctattgatgt  | tactatcaca  | aatatataaa |
| 6541 | acgggcagTt  | attaattagt  | gcattcccta  | ttattccact  | gtgtctgtac  | cttgCagtga |
| 6601 | tgcctagcga  | aagTtgTggT  | agtatagcac  | atatccctaa  | attgattaat  | attaaataga |
| 6661 | gaattTtttag | cagcctTttt  | gatggcctga  | agatcaacaa  | gtaaactatg  | gttgtagcta |
| 6721 | ttgtaacact  | agttaatcca  | agaaattgaa  | ccaatatatc  | agctaaatat  | gaacttacta |
| 6781 | ttccacctaa  | atttgtcact  | tcctcatTttg | tagctgtgtt  | taaggaagga  | tctttatagt |
| 6841 | tatagctaaa  | aactgatata  | tatatatata  | ttaaaaggga  | tagatatatt  | gctgattTta |
| 6901 | gatattTttt  | taacatctac  | ctaaagtagt  | aagctactgt  | atattTttaca | aagtgaattg |
| 6961 | ttattagcaa  | tatcattata  | gataaatcta  | atccgttgaa  | cggTggtata  | tatcttctaa |

|       |             |             |             |             |             |             |
|-------|-------------|-------------|-------------|-------------|-------------|-------------|
| 7021  | taatcttttag | tgggtggatat | gtcaatttgg  | tcaagatgtg  | cattatgcta  | ctgacagttt  |
| 7081  | cattatatata | gttcaccata  | ttaagtttaa  | ccagccagtt  | taggacaacc  | caacatatta  |
| 7141  | gaatgaagct  | ataaagatca  | agtaacgtat  | tgagtagata  | tatgattgga  | tgcatacata  |
| 7201  | tctattacac  | gaaagttata  | taaaagacaa  | gtattttagcc | ttttcaaact  | caaaatgttg  |
| 7261  | tttttgcgtga | accaaaaaaa  | acttcatttt  | ttgagctgcg  | caaagccacc  | taaagtagag  |
| 7321  | aatggacaag  | gaaggagggg  | tgtataatat  | atattaatgt  | tgatatttat  | ttcttataaa  |
| 7381  | tatcatctct  | atgtcctatc  | tctgtgatag  | ttactatatg  | atctaattga  | tttactctgt  |
| 7441  | aaattacacg  | atagtcacca  | actcttagcc  | ttctacatcc  | ttttaagtta  | tgatgtagtg  |
| 7501  | gttcaccaaaa | atttattggg  | tcaactgtaa  | gacgttcttt  | tatagccttt  | tgaactctta  |
| 7561  | gccttattgt  | ctttggaagg  | tttggtaaat  | ctttttcaac  | aacactcttt  | agagacttaa  |
| 7621  | ccttgtaacg  | ctctaattccc | acttaatatc  | ttcaaaaatca | actgtttctg  | caccttcaac  |
| 7681  | atcacgctca  | tcagaaattt  | tagatactaa  | aaaatcctcc  | atttcaagct  | caactgcttc  |
| 7741  | tctaaatagt  | tttcctgcta  | attcttgaac  | gggctgttta  | gtaaattcag  | ataattcagc  |
| 7801  | aagatgcttt  | aaagtttctt  | cgctaagagc  | tatgttaatg  | cctgaatttg  | ccatatgttt  |
| 7861  | taccgaactc  | tactactgta  | acaagcatat  | aacatttttt  | ttaatttttc  | aataaagaaa  |
| 7921  | gttgatgata  | cgtaagaaaa  | attttgccac  | ctgcgttaat  | aaataattaa  | aaatttagca  |
| 7981  | tatttatcta  | ccctctattc  | tattacttaa  | gttagaccac  | ttttttctat  | taatatTTTT  |
| 8041  | tgtttataaaa | gatgagcagt  | tactcatcac  | gcagttgatc  | tatggatata  | atactaccgt  |
| 8101  | ttgatagttt  | ttcagtacat  | ttttcacttt  | tgtattcttt  | atcagagtcg  | atactgattt  |
| 8161  | tgtcaaatat  | taaaacatct  | cctgaaattt  | tatcacgaaa  | ctcactaata  | gcaaaaaacg  |
| 8221  | gtatagtaat  | tcgctcttgt  | tttccttgaa  | aactcaaact  | gacgctaaat  | ttatcctcag  |
| 8281  | aaacttttaa  | atcatagaat  | tgatgctgta  | atataataag  | catttgagta  | gggtatgact  |
| 8341  | ttttcaaacg  | atctggcatg  | gtcacaccat  | taaaatatgt  | gaaaaataat  | atttctaagt  |
| 8401  | gagggataaa  | accattacct  | gatataacat  | ctaaagtctt  | tttgataact  | tgaaacttag  |
| 8461  | cagaattaag  | cagttttttg  | taatctgttt  | gctccatata  | actttcacat  | acgtaaattt  |
| 8521  | tgggggaact  | tctgttacct  | ggcgttcctt  | aaaccgtgct  | ttagtaataa  | accggttggt  |
| 8581  | ctaaattaag  | cagcaacacg  | atattcttca  | gcagcaaaat  | tatcgtttgc  | atttaaatta  |
| 8641  | tgaactctta  | gcggtggtgt  | ctaaccgagc  | aaagctacca  | tctttactat  | gcatgtcgat  |
| 8701  | ccttaatcgc  | ccccgtataa  | ttaaaaaaca  | tgggtggaggc | gccgagtact  | gccctcgggt  |
| 8761  | ccaatacacc  | tattacaagg  | taatttttatt | gctatagtac  | acaaaatgta  | catagctatt  |
| 8821  | atatagcaac  | attaaataaa  | tgtcaagata  | ttatgacctt  | aagttgattt  | attgctaaaa  |
| 8881  | caaaattaat  | atttccagta  | aaaaattctg  | tgtctttaac  | ctgacacata  | tggctttttg  |
| 8941  | aatactccca  | atgaaaatat  | ttataaataa  | atattttactc | ttcttttttta | ttgttttttag |
| 9001  | gtttttcttg  | atcaaccatt  | tctccaccga  | tctctttttat | tttttagtata | aacgactctg  |
| 9061  | gtacatacat  | gtcaattact  | tcttctgctg  | tcacaaaataa | agcctgataa  | gagtggtgaat |
| 9121  | ttattatcca  | atttaggcaat | atgtcttctg  | cttctattttt | atactctccc  | tcttttttgt  |
| 9181  | catatactgt  | gtagcaatat  | aagtgcacag  | taaaaaataa  | tacataagag  | agcaatatct  |
| 9241  | ctttaagcac  | tccgagaaaag | attccagtaa  | ctctatcgat  | aaaccccaac  | cttatgggta  |
| 9301  | ataatatgta  | cattagccag  | ttattttatta | tcatgaatat  | aagattaagt  | ataataaata  |
| 9361  | cagagattgt  | agaaagtatg  | tttagtgtaa  | ctttagaatc  | aaaatattta  | ctataatttg  |
| 9421  | gagtgaaaaa  | atcatagtga  | ttagctgtca  | gaaagaccga  | taaaaataga  | aacatttagt  |
| 9481  | cgcatagctc  | ttttataaaag | cctctagtta  | ccgagattat  | tacgcataga  | acaacaatga  |
| 9541  | agataattag  | gctatcgaaa  | agcatgtttt  | atatctatat  | ggtttttcaag | atataatagt  |
| 9601  | tgtaaataac  | aagggttgtaa | aattaattgt  | atttatgctg  | catcaattga  | tctaaatacc  |
| 9661  | tagcgatcat  | gtcaattttct | aaattcaaat  | aatcatttac  | tttgttgtac  | tgaaaagtgt  |
| 9721  | tattttccca  | tgtataggga  | gtgatattta  | ctgtaaaattc | ctgattaaca  | actgaattca  |
| 9781  | ctgtgaggga  | aaccccatct  | agtgtaacgg  | agctttttttt | tgcaacaaat  | ttaattaatt  |
| 9841  | cttgtgggca  | cgatagtttg  | atttcatgag  | aatctaaatt  | ttgattaatt  | gttaaaaaatt |
| 9901  | ttactatccc  | atcaacatga  | ccctgaacca  | gggtggccatc | gatcttatcg  | cttaatctca  |
| 9961  | ttgcttggtc  | gagattttatt | ttttttccta  | ttctccacgt  | atttaagtta  | gcaaccttca  |
| 10021 | tagtttcttg  | agatgcttgg  | actgtaaatg  | tatcgctcat  | tatatcaaca  | acagttaaac  |
| 10081 | acacaccaga  | gcaagctatt  | gaatctcctt  | tatttataga  | ggataaaattt | tgtgtcttga  |
| 10141 | tatggaaaaat | ttgatcagag  | ttggagttag  | tggtagtatc  | agttatagtc  | ccgatatccg  |
| 10201 | tgataattcc  | tttaaacata  | tggtgaaaaat | aaataattttt | accatgaaaa  | atttttttaca |
| 10261 | acaacttatt  | tctatttttgt | tatagttaaa  | gtaattcttg  | tttaccgaca  | atttaaaaaa  |
| 10321 | cgacaaattc  | gtcatcccgc  | tacgtgttag  | cgggatctag  | agataccgtg  | acggtatgac  |
| 10381 | gtaggaaaaac | tgagcctgca  | ctagctatag  | gcgcgagaaa  | ggggatcggt  | ttcacttact  |
| 10441 | tgcttaatag  | attctataga  | atattcagaa  | tatataaaagc | gagctaaatt  | caaaaatacac |
| 10501 | agcgcgatta  | atattggcaa  | ccctatgttc  | aatgctaacc  | caatactttc  | ccttttttct  |
| 10561 | ggtagcacta  | atcctttttaa | cattgacact  | tttcctaattg | gaaaatgccca | taagcaaagt  |

|       |             |             |             |            |             |             |
|-------|-------------|-------------|-------------|------------|-------------|-------------|
| 10621 | gttgatgcag  | atgctactat  | tataaataga  | caaaaataag | ccttttttga  | ggaaaataca  |
| 10681 | gtttttaacg  | gtgatttgag  | tgtaatgtta  | gtaggtggta | gagtttttagc | ttcatttggtt |
| 10741 | gctggtgaaa  | gatctttaat  | tggtaaaggg  | tttgtagatt | tatgaggagt  | attttcatgt  |
| 10801 | tgtggagaag  | gttggtgtat  | ataaacacct  | gaaactaatt | taagcaattg  | ctctttttttt |
| 10861 | ctatatactt  | gtttttgtaa  | atattcttta  | cctaaaagt  | agttactaag  | aggttgtggc  |
| 10921 | ctttcgagta  | tctgtaatac  | ttctgatatt  | tcgcctggct | ctaataattgc | atgtaattgt  |
| 10981 | ttatcttgaa  | agtaaacaat  | attgaatact  | gagctgaaaa | tattgcaaaa  | tgtttctgga  |
| 11041 | tcttgatttt  | tgtatccact  | catcacttca  | ataaatattt | tatcgagctt  | tttccccctg  |
| 11101 | tgctcaattt  | tgttatctat  | cacagctact  | ctagcatcat | ttcgtgcttg  | ttttatggta  |
| 11161 | gattgttttt  | cttcttctgg  | tagttcttga  | gattgctttt | tcgatttttt  | tctattagct  |
| 11221 | ttaaaatact  | ctgtgtgcga  | agtagtttga  | cctacattct | gttctgcttc  | ttgaggattt  |
| 11281 | ggatttttcta | tactaccccc  | tgtcatccga  | gtagcttgac | tacttggatc  | catgttttctt |
| 11341 | ttttcctggg  | caaacgctgg  | aataacacca  | aatggtatat | tgttgctctg  | tatagaaaat  |
| 11401 | tttggcaatt  | gttgggaaaa  | gaattgtgac  | gtattaaaaa | aattgggtag  | acagaaaaaa  |
| 11461 | gatctaaacc  | agaaaacggt  | ttcatgcatt  | gcagcaacta | ctatcgaaac  | acgtgtaact  |
| 11521 | tgttttccat  | tatttgttac  | atcgaagcca  | aatgagcctg | taactgggtac | gatttgttta  |
| 11581 | ttttgtgcat  | ttttttgggt  | agtttcactc  | tgttcttttt | tgtcttcatt  | ttcagttttt  |
| 11641 | tctgcatggt  | gtagcttttc  | atttagaaat  | aactcgattt | ggtacaagtt  | gtccagggtta |
| 11701 | atgttttcaa  | cgtctgtttg  | tagcgttatc  | gttgtgccct | gcagaaggat  | ttgaggcgga  |
| 11761 | gcactattta  | cgaattcttc  | tacagtttta  | taactgttag | ttttacagta  | gttattatat  |
| 11821 | agttcactgc  | tttctttggg  | cacttttatg  | ttggctgtaa | attttttttc  | ccgggaaagg  |
| 11881 | cagattttga  | aaaaatcaat  | taaagggttt  | attcgaaata | atcttatatt  | aaaggtgtct  |
| 11941 | ttatctgttg  | ctgttagctc  | aaatgaaaat  | ttttgtatat | tgctttcaat  | acttctcgag  |
| 12001 | cgaatagcac  | tgatcttaat  | tgtttcgcta  | gaaaatgctt | tacttatggt  | tctggatttt  |
| 12061 | tccttaaaga  | gcttaggtaa  | atcctctatt  | ttatacttat | tcttagtttc  | agtgttactg  |
| 12121 | ttgtgcatag  | ttgatacagc  | aaattcatca  | acgcaaaggt | aaataaaaaa  | gattaattag  |
| 12181 | tcaataaatt  | aataatcaga  | atagggcaat  | ttttcggatt | gttgatgata  | tttaaaattt  |
| 12241 | cactataatg  | aaagtttaag  | ccagcgtttt  | taagatgaat | aaagagttat  | tagatgaaat  |
| 12301 | actttcactt  | gaagataaag  | cagtttccga  | aattgagaat | gcttcttctt  | tgcaagattt  |
| 12361 | agaaaaagtt  | aggctattat  | atttgggaaa  | aaagggtgta | gttagagcgt  | attttgataa  |
| 12421 | cttaaaaaag  | atagaaaatg  | cagagaaaaa  | gcgtgattta | ggtgcagtga  | ttaacgcttt  |
| 12481 | acgtgataag  | atagatcatc  | ttatcatgaa  | tagggaaaaa | gtgctaaaaa  | cagaagaagt  |
| 12541 | taacttttaa  | ttgcagaacg  | aggcggttga  | tatcacgttg | cccgttagac  | cagaaaaaat  |
| 12601 | gggcaaggtc  | catccactca  | gtaaggttat  | aaatgaagta | aagcttattt  | ttgcacatat  |
| 12661 | gggtttttaa  | gcagttgatg  | gccctgatat  | tgaagatgaa | tttcatgtat  | ttgatgcact  |
| 12721 | gaatactcca  | agtcatcatc  | ctgcgcgaga  | ggagcaagat | accttctact  | taaagaacaa  |
| 12781 | aatagatgat  | aaaagaatgg  | tactgcgcac  | tcacacctca | tctgtacaga  | ttagaaccat  |
| 12841 | ggaaaaaaca  | aaaaagttcc  | caattaaaaa  | agtagctgca | ggtagagtat  | acagaaacga  |
| 12901 | ctttgatgca  | actcacaccc  | ctatgtttcca | tcaaatagag | gggttatatg  | tcgatgagaa  |
| 12961 | tgtcaatatg  | ggccagttaa  | aatttactat  | tcatcacttc | cttaataagt  | tctttggcga  |
| 13021 | taaagggctg  | aagatacgtt  | ttcgtaatat  | ttttttccct | tttaccgagc  | cttctgcgga  |
| 13081 | agtggacata  | agttataaag  | gtagtaaatg  | gatagaagta | ctgggatgcg  | gtatgacgca  |
| 13141 | tccaaatgta  | tttcaaaatg  | ttggaataga  | ccatactaaa | tacaacgggt  | ttgcgtttgg  |
| 13201 | cattgggtata | gaaaggcttg  | caatgctaaa  | atatcaaatt | agcgacttga  | ggagctttta  |
| 13261 | tgacaacaaa  | atcagctggc  | ttgatcatta  | cggttttcat | ttttcatctt  | taagataagt  |
| 13321 | gataagtaaa  | actcatacgt  | tcgttatact  | tgctgcaggg | catggcaggc  | ggatgaattc  |
| 13381 | agatttgcct  | aaggctcctac | acaaaatagg  | cagtttttcc | atgctccagc  | atgtcattta  |
| 13441 | caatgcaaaa  | cagttaaatc  | ctgaaaaatat | tgctgttgta | gttgatcagc  | ctttaattga  |
| 13501 | aagactaaag  | tgtttttaag  | atatacagtt  | aattacacaa | gaattaacac  | ttggcacggg  |
| 13561 | agatgcggtc  | aaaactgcga  | tgagaaacct  | aagagaattg | ccagattcaa  | gcatagtgtg  |
| 13621 | tgtgcagtat  | ggggatactc  | cgctcataaa  | aagcagcaca | ataactaaaa  | tgattagtta  |
| 13681 | tttagaaggc  | aaggctctag  | tttgcctagg  | ttttaggaca | agcaataaag  | aatacggtag  |
| 13741 | gttaattatt  | gagaatggtt  | ccttaagaga  | aatcgtagaa | gcaaagagtg  | ataaaaaataa |
| 13801 | tcatgaagaa  | tttcttgcca  | atgctggaat  | aatggtggca | tgtgcaaaga  | atttacgtga  |
| 13861 | attgggtggag | aaaatagagt  | gcaatagctc  | aactcatgaa | tattacttga  | ccgatatagt  |
| 13921 | ttccattgca  | gtgaagagta  | atttaaatgt  | cggttacgtt | attaccgggtg | gagaagaagc  |
| 13981 | aacgggaata  | aataacagaa  | atgaccttat  | aaaagctgaa | ttttactttc  | aagaaaaataa |
| 14041 | aagaaaagtt  | tttaccgact  | ccggagtaac  | gcttggtgca | ccagagactg  | ttttcttttc  |
| 14101 | tcttgatacg  | caaattgcca  | gagattcagt  | tattttacca | tatgtttttt  | ttcgggtactg |
| 14161 | gagtgaaaat  | agagtctggt  | gcgaaaatac  | tgccattttc | gcatttagaa  | aattgcttaa  |



```

/collection_date="2018-11"
/metagenome_source="insect metagenome"
/note="metagenomic"
gene      <1..125
          /locus_tag="wEsol_01284"
CDS       <1..125
          /locus_tag="wEsol_01284"
          /codon_start=1
          /transl_table=11
          /fullproduct="qcoverage 100 , hcoverage 97.5609756097561
, similarity 100 , identity 100 , evaluate 2.40e-17 ,
alnlength 40 , Bacteria , Proteobacteria , WP_187470106.1
hypothetical protein, partial [Wolbachia endosymbiont of
Drosophila sechellia]"
          /cog="Lig COG0272 667 NAD-dependent DNA ligase (contains
BRCT domain type II)"
          /pfam="BRCT"
          /tigr="TIGR00575 dnlj 652 DNA ligase, NAD-dependent"
          /product="hypothetical protein, partial"
          /translation="SVSPKTDFLVVGEKPGSKLEKAKKLGILKILTEEEFNMREK"
          /besthit="qcoverage 100 , hcoverage 97.5609756097561 ,
similarity 100 , identity 100 , evaluate 2.40e-17 ,
alnlength 40 , Bacteria , Proteobacteria , WP_187470106.1
hypothetical protein, partial [Wolbachia endosymbiont of
Drosophila sechellia]"
gene      389..1060
          /locus_tag="wEsol_01285"
CDS       389..1060
          /locus_tag="wEsol_01285"
          /codon_start=1
          /transl_table=11
          /product="hypothetical protein"
          /pfam="PDDEXK_2"
          /tigr="TIGR01784 T_den_put_tspse 273 conserved
hypothetical protein"
          /translation="MALSKFLNPKLDLTFKKVFGTEKNKNILIHFLNDILGFTGIDTI
QEVEFLSTYMDPEVASDKQSIVEVLCKDSSGFRYVIEMQLARDRGFEKRAQLYAAKAY
SRQADKGDQYHNLKEIIFIAIADCVLFPNKSEYKSKHTIRDEDTNEHDLKDFYFIFIE
LPKFAKNKVEQLESTIERWCFFFKYAEDTTDEDLKDIAEKSPIIKLAYDELDKFRWNE
KDLIA"
          /besthit="qcoverage 100 , hcoverage 75.8503401360544 ,
similarity 100 , identity 100 , evaluate 2.12e-156 ,
alnlength 223 , Bacteria , Proteobacteria ,
WP_015589065.1 MULTISPECIES: Rpn family
recombination-promoting nuclease/putative transposase
[unclassified Wolbachia]"
gene      1073..1273
          /locus_tag="wEsol_01286"
CDS       1073..1273
          /locus_tag="wEsol_01286"
          /codon_start=1
          /transl_table=11
          /product="hypothetical protein"
          /pfam="Pfam-B_12708"
          /tigr="TIGR01784 T_den_put_tspse 273 conserved
hypothetical protein"
          /translation="MDLRKEEGILAQKLLDDARDEGIQIGHEKGRKAIEVAKNLLKA
GVSIDIIAQTTGLTADEIKNLS"
          /besthit="qcoverage 100 , hcoverage 40.7407407407407 ,
similarity 100 , identity 100 , evaluate 1.27e-34 ,

```

```

alnlength 66 , Bacteria , Proteobacteria , WP_187470059.1
Rpn family recombination-promoting nuclease/putative
transposase, partial [Wolbachia endosymbiont of
Drosophila sechellia]"
gene      1390..1677
          /locus_tag="wEsol_01287"
CDS       1390..1677
          /locus_tag="wEsol_01287"
          /codon_start=1
          /transl_table=11
          /product="hypothetical protein"
          /pfam="Pfam-B_13602"
          /translation="MFFQQHPNPFVSIINQNIEVPYKLTHNNHPCSLWARQSEGNFYW
FGRELCKEYTWRYKRTHKSEEIVDWCDNKNKDLLIFQLLYKHCLIAINVVVP"
          /besthit="qcoverage 81.0526315789474 , hcoverage
46.3855421686747 , similarity 92.2 , identity 88.3 ,
evaluate 7.79e-45 , alnlength 77 , Bacteria ,
Proteobacteria , WP_155968684.1 pyrimidine dimer DNA
glycosylase/endonuclease V [Wolbachia pipientis]"
gene      1710..1853
          /locus_tag="wEsol_01288"
CDS       1710..1853
          /locus_tag="wEsol_01288"
          /codon_start=1
          /transl_table=11
          /product="hypothetical protein"
          /translation="MRFAKWEKSRRLDNGKFNATGIQLIGRECIQIGYKKVKLKLQKI
REC"
gene      1945..2541
          /locus_tag="wEsol_01289"
CDS       1945..2541
          /locus_tag="wEsol_01289"
          /codon_start=1
          /transl_table=11
          /product="hypothetical protein"
          /translation="MRELTMDRIACLSKDLNEFFNEKADEISIAVGFIKRKRKLNSS
FIKAMVFGNIGVDDCSIETMCQLLNEDSIEITKQGLDFRFSEEAVEFMKKMYNEALCL
FKKSLQIDCKILQQFGSVKLLDSSYISLPISMEDMYKGYGSSYRDCENNTKSGIKLQL
VFDYLNQALDKLNFMEGIRSDQGYRDYLNGLSAVKDKI"
          /besthit="qcoverage 97.4747474747475 , hcoverage
43.1767337807606 , similarity 99.5 , identity 99.5 ,
evaluate 6.40e-130 , alnlength 193 , Bacteria ,
Proteobacteria , AGJ99681.1 Transposase, IS4 family
[Wolbachia endosymbiont of Drosophila simulans wHa]"
gene      complement(2557..3645)
          /locus_tag="wEsol_01290"
CDS       complement(2557..3645)
          /locus_tag="wEsol_01290"
          /codon_start=1
          /transl_table=11
          /pfam="HTH_29 HTH_23 HTH_28 Pfam-B_17750 rve Pfam-B_10563
rve_3 Pfam-B_18326"
          /fullproduct="qcoverage 100 , hcoverage 100 , similarity
100 , identity 100 , evaluate 4.74e-263 , alnlength 362 ,
Bacteria , Proteobacteria , WP_015588908.1 MULTISPECIES:
IS481-like element ISWpi2 family transposase
[unclassified Wolbachia]"
          /translation="MSTIQTKILKPKLGLLELAKQLGNVSQACKVMGYSRDTFYRFKE
LYENGGEALHEISKKKPLLNRVSDDIERAVIGIATEFPAYGQERAANELRKGIII
SQGGVRSVWLRNDLETLKKRLKALETQVAQDGIILTEEQLAALEKVKEQREAHGEIET

```

QHPGYLGSQDTYYVGNIGIGRIYQQTFVDITYSRVAMVKLYTDRTAITAADLLNDRVI  
 PFFDEQKIPLLRILTDRTGTEYCGKPENHAYQLYLGNIENIDHSRTKANSPQTNGICKRF  
 HRTMQDECYNIIFRKKIYSSLEDLQIDVDHWLRSYNETRPHSGKYCYGKTPMQTFlds  
 KYIAFQKNISSITQEPDISFDYLNSSVS"  
 /product="IS481-like element  
 ISWpi2 family transposase"  
 /besthit="qcoverage 100 , hcoverage 100 , similarity 100  
 , identity 100 , evalue 4.74e-263 , alnlength 362 ,  
 Bacteria , Proteobacteria , WP\_015588908.1 MULTISPECIES:  
 IS481-like element ISWpi2 family transposase  
 [unclassified Wolbachia]"  
 gene complement(3700..3825)  
 /locus\_tag="wEsol\_01291"  
 CDS complement(3700..3825)  
 /locus\_tag="wEsol\_01291"  
 /codon\_start=1  
 /transl\_table=11  
 /product="hypothetical protein"  
 /pfam="MarR\_2"  
 /translation="MEGGKITQTEWARELGVSKQYVCYLVKKGIVELEDGVLNKT"  
 /besthit="qcoverage 97.5609756097561 , hcoverage  
 24.5398773006135 , similarity 100 , identity 90.0 ,  
 evalue 3.19e-17 , alnlength 40 , Bacteria;Viruses ,  
 Proteobacteria;Uroviricota , WP\_010962472.1 MULTISPECIES:  
 MarR family transcriptional regulator [Wolbachia]"  
 gene complement(3842..5074)  
 /locus\_tag="wEsol\_01292"  
 CDS complement(3842..5074)  
 /locus\_tag="wEsol\_01292"  
 /codon\_start=1  
 /transl\_table=11  
 /pfam="ParBc Pfam-B\_13714 N6\_N4\_Mtase UPF0020  
 Methyltransf\_26"  
 /fullproduct="qcoverage 99.2682926829268 , hcoverage  
 99.2682926829268 , similarity 99.3 , identity 98.0 ,  
 evalue 5.28e-298 , alnlength 407 , Bacteria ,  
 Proteobacteria , WP\_174516740.1 MULTISPECIES: DNA  
 modification methylase [unclassified Wolbachia]"  
 /translation="MNLAIHYYPNIENLVEYERNPRKNDDVVNRMCASIREFGFRIPIV  
 AKSDGTVVDGHLRLKAARKLGMEIPVVLSDNLSEAQTAKFRLLANQSANWAKWDDDL  
 LKLEIQELEDLEFDLKMGTGFELEKQVRFNDIDGKEEVERGEKEGVELVDKKSVMVSKP  
 GDLWILGGHRIYCGDSCLVESFKAVLDDKMADITVCDPPYNLAYGDSQEREDKKILND  
 DQGEKYELFLYDICS HVLAYTKGAIYICASSSELATLQKVFEAEAGGRWSTFIIWAKNH  
 FTLGRSDYQRQYETILYGWKNGNKREWHGGRNQSDLWFYDKPTYNSLHPTMKPVELME  
 RAIVNSSGPGDIVLDPFSGSGSTLIACERTGRICRTIELDPTFVDVTIKRWQVYTGRE  
 AILSNTGKTFAQIQEEKR"  
 /product="DNA modification  
 methylase"  
 /besthit="qcoverage 99.2682926829268 , hcoverage  
 99.2682926829268 , similarity 99.3 , identity 98.0 ,  
 evalue 5.28e-298 , alnlength 407 , Bacteria ,  
 Proteobacteria , WP\_174516740.1 MULTISPECIES: DNA  
 modification methylase [unclassified Wolbachia]"  
 gene complement(5216..5692)  
 /locus\_tag="wEsol\_01293"  
 CDS complement(5216..5692)  
 /locus\_tag="wEsol\_01293"  
 /codon\_start=1  
 /transl\_table=11  
 /fullproduct="qcoverage 100 , hcoverage 100 , similarity

```

100 , identity 100 , evalue 1.29e-113 , alnlength 158 ,
Bacteria , Proteobacteria , WP_015588906.1 MULTISPECIES:
Holliday junction DNA helicase RuvC [unclassified
Wolbachia]"
/translation="MSILTLDLGKQTGWAILTDGVIQSGSKNFHGSRFSGGGMHFLNF
RRWLNEMRERFSDIEAVYFEEVRRHLGTDAAHCYGGFFAILTAWCEEHHIPYKGV PVK
TIKRFIAGKGNASKGEVIEAVRGKGFFPQDDNEADALALMFYVNNFSKDFNMLDNT"
/product="Holliday junction
DNA helicase RuvC"
/besthit="qcoverage 100 , hcoverage 100 , similarity 100
, identity 100 , evalue 1.29e-113 , alnlength 158 ,
Bacteria , Proteobacteria , WP_015588906.1 MULTISPECIES:
Holliday junction DNA helicase RuvC [unclassified
Wolbachia]"
gene 6538..6957
/locus_tag="wEsol_01294"
CDS 6538..6957
/locus_tag="wEsol_01294"
/codon_start=1
/transl_table=11
/product="hypothetical protein"
/pfam="Pfam-B_347 Virulence_RhuM"
/translation="MDENKIVFYTTTPGGNIEIEVLCRDENLWLTQKRMAELFDVQLPA
ISKHIKNIFESGELQEKEVSTFEVTAADGKNYPTQLYNLDTIIAVGYRVNSKKATLF
RVWATKVLKDFI IKGFALDSERLKNGKKFGKDYFEEL"
/cog="COG3943 COG3943 329 Virulence protein"
/besthit="qcoverage 100 , hcoverage 41.6167664670659 ,
similarity 99.3 , identity 99.3 , evalue 4.00e-91 ,
alnlength 139 , Bacteria , Proteobacteria ,
WP_208571672.1 virulence RhuM family protein [Wolbachia
pipientis]"
gene 7032..7814
/locus_tag="wEsol_01295"
CDS 7032..7814
/locus_tag="wEsol_01295"
/codon_start=1
/transl_table=11
/fullproduct="qcoverage 100 , hcoverage 100 , similarity
100 , identity 100 , evalue 2.15e-185 , alnlength 260 ,
Bacteria , Proteobacteria , WP_174516999.1 hypothetical
protein [Wolbachia endosymbiont of Cardiocondyla
obscurior]"
/cog="Lig COG0272 667 NAD-dependent DNA ligase (contains
BRCT domain type II)"
/pfam="DNA_ligase_OB DNA_ligase_ZBD HHH_2"
/tigr="TIGR00575 dnlj 652 DNA ligase, NAD-dependent"
/product="hypothetical protein"
/translation="MNPVAKVIPINIGGVLITRVNLHNKDEIKRKDIREGDIVTIKRA
GDVIPKIIDVDKSARSRKAPKFVFPDICPECGSRVDDWEATIRCTGENVCPAQRIGKL
KHFVEVLDIKGFGGKQVEFLYDLGLIRKISDIFALEEKLKNFNLSEQRGWDKQSIFNL
LHSINSKRTVTLEKFITSLGIKLVGPHVAKLLAKHYQSYENWMAQLPYDREAPDKLMI
IGVGEETITSLEEFFSDEDNVEMVKNLASQLKIEPVSAKFPS"
/besthit="qcoverage 100 , hcoverage 100 , similarity 100
, identity 100 , evalue 2.15e-185 , alnlength 260 ,
Bacteria , Proteobacteria , WP_174516999.1 hypothetical
protein [Wolbachia endosymbiont of Cardiocondyla
obscurior]"
gene 7795..8040
/locus_tag="wEsol_01296"
CDS 7795..8040

```

```

/locus_tag="wEsol_01296"
/codon_start=1
/transl_table=11
/fullproduct="qcoverage 100 , hcoverage 100 , similarity
100 , identity 100 , evalue 2.64e-45 , alnlength 81 ,
Bacteria , Proteobacteria , WP_174516998.1 hypothetical
protein [Wolbachia endosymbiont of Cardiocondyla
obscurior]"
/cog="Lig COG0272 667 NAD-dependent DNA ligase (contains
BRCT domain type II)"
/pfam="BRCT PTCB-BRCT"
/tigr="TIGR00575 dnlj 652 DNA ligase, NAD-dependent"
/product="hypothetical protein"
/translation="MLNSPLSGKTVVITGELSGMKRKEAQAKAESLGVKVSSSVSKNT
DFVVIGKDPGSKYHKALELGVEILSEEEFNKLIMREK"
/besthit="qcoverage 100 , hcoverage 100 , similarity 100
, identity 100 , evalue 2.64e-45 , alnlength 81 ,
Bacteria , Proteobacteria , WP_174516998.1 hypothetical
protein [Wolbachia endosymbiont of Cardiocondyla
obscurior]"
gene complement(8177..8440)
/locus_tag="wEsol_01297"
CDS complement(8177..8440)
/locus_tag="wEsol_01297"
/codon_start=1
/transl_table=11
/product="hypothetical protein"
/pfam="RadC Prok-JAB"
/tigr="TIGR00608 radc 218 DNA repair protein RadC"
/translation="MPFDRGRSICWQAPVYTREIIKKALLKNTTSIVISHNHPGGSEK
PSEADKTMKSLALACHSVGIKFLDHIIITGDDYFSFRQNGLL"
/cog="RadC COG2003 224 DNA repair proteins"
/besthit="qcoverage 87.3563218390805 , hcoverage 47.5 ,
similarity 82.9 , identity 68.4 , evalue 1.44e-29 ,
alnlength 76 , Bacteria , Proteobacteria , WP_019236459.1
JAB domain-containing protein, partial [Wolbachia
pipientis]"
gene complement(8380..8790)
/locus_tag="wEsol_01298"
CDS complement(8380..8790)
/locus_tag="wEsol_01298"
/codon_start=1
/transl_table=11
/fullproduct="qcoverage 100 , hcoverage 86.6242038216561
, similarity 94.9 , identity 91.9 , evalue 7.57e-82 ,
alnlength 136 , Bacteria , Proteobacteria ,
WP_007549019.1 MULTISPECIES: hypothetical protein
[unclassified Wolbachia]"
/cog="RadC COG2003 224 DNA repair proteins"
/tigr="TIGR00608 radc 218 DNA repair protein RadC"
/product="hypothetical protein"
/translation="MESK GKALLDREIIETFLSAVHDRAQAQAI AKNLVDTCTGIGRI
LGREMD ELKSIEGVADSTVSMIFCVKETLTRVLKEELKKGPILDNLDKLIEYLRVSIG
YSDKENITIMYLNQGCHLIGEEVFAGRRLSIQGK"
/besthit="qcoverage 100 , hcoverage 86.6242038216561 ,
similarity 94.9 , identity 91.9 , evalue 7.57e-82 ,
alnlength 136 , Bacteria , Proteobacteria ,
WP_007549019.1 MULTISPECIES: hypothetical protein
[unclassified Wolbachia]"

```

|      |             |             |             |            |             |             |
|------|-------------|-------------|-------------|------------|-------------|-------------|
| 1    | caagtgtatc  | gcctaaaacg  | gacttcttgg  | ttgtcggcga | aaaacctggg  | tcaaagctcg  |
| 61   | aaaaggctaa  | aaagctgggt  | attaaaat    | taaccgagga | ggaattta    | atgagagaaa  |
| 121  | aataaacgct  | attgaagggt  | atctttgatg  | gccattacag | ttgctaaat   | catgacatcc  |
| 181  | atgtgtggtc  | cttttaagat  | actttacaga  | atggttgata | aaagagtaca  | aaaggagtct  |
| 241  | agagtatgaa  | atgctattct  | cagatcattt  | atggaagaca | tttttttcat  | caacacattc  |
| 301  | aaaacttaaa  | aaataaacta  | aaaataaaga  | agttgaatat | ttcttcagaa  | ttgtgtataa  |
| 361  | ttattaatgc  | tttttaggta  | ctctcgctat  | ggctctttct | aagtttctca  | atccaaaatt  |
| 421  | agacttaacc  | ttcaaaaagg  | tctttgggtac | cgaaaaaaat | aagaacattc  | ttattcactt  |
| 481  | cctcaatgat  | atcttaggat  | ttaccgggat  | agatactata | caagaagttg  | agtttcttag  |
| 541  | cacctacatg  | gatcctgaag  | tcgcctctga  | taaacaaagc | atcggtgaag  | tcctttgcaa  |
| 601  | ggattctagt  | gggttcagat  | atgtaatcga  | gatgcaactc | gctcgtgata  | ggggctttga  |
| 661  | gaaacgtgct  | cagctatatg  | ctgctaaagc  | ttactcaagg | caagctgata  | aaggtagacca |
| 721  | gtatcataac  | cttaaggaaa  | ttatcttcat  | tgctatagca | gattgtgtac  | tgtttcctaa  |
| 781  | taaatctgag  | tacaaatcaa  | agcatactat  | tcgagatgaa | gacactaatg  | agcatgatct  |
| 841  | aaaagatttc  | tattttatat  | ttattgagtt  | gcctaaattc | gcaaaaaaca  | aagtagagca  |
| 901  | gctagaaagt  | acaatagagc  | gctgggtgctt | ttttttcaag | tacgcagaag  | atactacaga  |
| 961  | tgaagaccta  | aaagatattg  | cagaaaaatc  | gccataata  | aagctagcat  | acgatgagtt  |
| 1021 | agacaagttt  | cgctggaatg  | agaaagatct  | gatagcgtag | gaagaaagga  | taatggatct  |
| 1081 | gcggaagaa   | gaaggcatcc  | tcgctcaaaa  | acttgatgat | gctagagacg  | aaggcatcca  |
| 1141 | aatcgacat   | gaaaaaggca  | gaaaagcaga  | gaaaattgag | gtcgcaaaaa  | acctacttaa  |
| 1201 | agcaggagtt  | tctattgata  | ttatagccca  | aactactggt | cttacagctg  | acgaaatcaa  |
| 1261 | aaacttaagc  | taattttatc  | tttgatgtc   | tagatgaaca | tctttgtact  | agatgaaaac  |
| 1321 | ccagcaattg  | cggcgcaa    | gttatgtata  | tagtaaaaa  | gccattagaa  | actgctcaat  |
| 1381 | tattgagtaa  | tgttttttca  | acagcatcca  | aatccttttg | tcagtatcat  | aaatcagaat  |
| 1441 | atagaagtcc  | catataaact  | gactcacaac  | aatcatcctt | gttctttgtg  | ggctaggcaa  |
| 1501 | tcagaaggga  | actttttattg | gttcggaaga  | gaattatgta | aagagtacac  | ttggcgatac  |
| 1561 | aaaagaacgc  | ataaatccga  | agaaatagta  | gattggtgtg | atagtaataa  | ggatttgcta  |
| 1621 | atttttcaac  | ttttatacaa  | gcactgtctg  | atcgctataa | atgtggtagt  | tccataaaag  |
| 1681 | cctatagaaa  | gtactattta  | caggaaaaga  | tgagatttgc | taagtgggaa  | aagagcagaa  |
| 1741 | gattggacaa  | cggaaaat    | aatgctacag  | gcatacagct | cataggtaga  | gaatgcatcc  |
| 1801 | aaattggata  | taaaaaggta  | aaattgaagt  | tgcaaaaaat | tcgggagtg   | taaaaaacc   |
| 1861 | atacgcgta   | agttaaggaa  | aagtgtgaagt | aaagttgata | gagtgaagga  | aaataataag  |
| 1921 | gtataaat    | tcttgatat   | atgaatgaga  | gaacttaca  | tggaacaga   | agcttgctta  |
| 1981 | tcaaaagacc  | tcaatgaatt  | ctttaatgaa  | aaagcagacg | aaatatcaat  | tgcaagtagg  |
| 2041 | tttataaaaa  | gaaagagaaa  | acttaatggc  | tcatcattca | taaaagctat  | ggtttttgg   |
| 2101 | aacataggag  | ttgatgattg  | cagcatagaa  | acaatgtgcc | aattgctaaa  | tgaagactcg  |
| 2161 | atagaaatta  | caaaacaggg  | tttagat     | aggtttagtg | aagaagcagt  | tgagttcatg  |
| 2221 | aaaaaaatgt  | ataacgaagc  | tttgtgttta  | tttaaaaaaa | gtctacagat  | tgattgcaaa  |
| 2281 | atttttacagc | aatttggaag  | cgttaaatta  | ttggatagca | gctacattag  | cctgcccatt  |
| 2341 | agcatggaag  | atatgtacaa  | aggatatggc  | agtagctata | gagattgtga  | gaataatacc  |
| 2401 | aaatcaggaa  | taaagctaca  | gtagtcttt   | gattacctga | atcaagcgct  | agataagtta  |
| 2461 | aatttttatgg | aaggaataag  | gtcggatcaa  | ggttataggg | attatctgaa  | cggtttatca  |
| 2521 | gctgtaaaag  | acaagatttg  | atctgacaga  | caagaattaa | ctgacagaag  | aattgaggta  |
| 2581 | gtcaaaacta  | atatcaggct  | cttgtgtaat  | gctactaata | tttttctgaa  | aagcaatata  |
| 2641 | tttgctatca  | agaaaagttt  | gcataggcgt  | tttgccatag | caatattttac | ccgagtgagg  |
| 2701 | tcttgtctca  | ttataagaac  | gcaaccaatg  | atcaacatca | atctgtagat  | cttccaaaga  |
| 2761 | actgtagatt  | ttcttttctaa | agatgatatt  | gtaacactca | tcttgcatgg  | ttctatgaaa  |
| 2821 | cctttttacat | atgccattag  | tctgtggaga  | gttggtttta | gttctagaat  | gatcgatgtt  |
| 2881 | ttctatgccc  | aaataaagct  | gataagcgtg  | attttcgggc | ttgccacagt  | actccgtacc  |
| 2941 | cctatcagtt  | aaaatgcgta  | ataatggaat  | tttctgctca | tcaaaaaaatg | gaataactct  |
| 3001 | atcgttgaga  | agatctgcag  | ctgtaatagc  | tgttctgtcc | gtgtaaagtt  | taaccattgc  |
| 3061 | aactctggaa  | taagtatcaa  | caaaagtttg  | ctgataaatg | cgccctatac  | ctttgatatt  |
| 3121 | gcccacataa  | taggtatctt  | gagaacccaa  | ataacctgga | tgttgcgtct  | caatttcacc  |
| 3181 | atgagcttcc  | ctttgttctt  | tcactttttc  | taaagctgca | agttgttctt  | cagttaaaat  |
| 3241 | gattccgtct  | tgagctactt  | ttgtctctag  | tgctttaagt | ctcttttttga | gagtttcaag  |
| 3301 | gtcatttctt  | agccatacag  | accttactcc  | tccctgagaa | attattatac  | ctctttttct  |
| 3361 | cagttcattt  | gcagctcttt  | cttgcccata  | tgctggaaat | tctgttgcta  | taccaatcac  |
| 3421 | tgctctttct  | atatcgtcgg  | aaactctgtt  | tgctaatagc | ggttttttct  | tacttatttc  |
| 3481 | atgtaatgct  | tcctctcctc  | catttttcata | taactcctta | aagcgataaa  | atgtatctct  |
| 3541 | tgagtatccc  | atcactttgc  | atgcttgaga  | cacatttctt | agttgttttg  | ctagttctaa  |

|      |            |             |             |             |             |             |
|------|------------|-------------|-------------|-------------|-------------|-------------|
| 3601 | taatcctagc | tttgggtttta | atattttttgt | ctgtatttga  | ctcatatcta  | acactccttt  |
| 3661 | atttttatta | tttttaactt  | acttttttaa  | agtgtcaggt  | caagtcttat  | ttaatacacc  |
| 3721 | atcctccagc | tcaactattc  | ctttctttac  | taaataacag  | acgtattgct  | ttgaaactcc  |
| 3781 | cagttccctt | gcccattccg  | tctgcgtgat  | ttttcctcct  | tccacttttt  | tctcctttct  |
| 3841 | tttaccgttt | ttcttcttga  | atttgtgcaa  | aggttttgcc  | agtattggaa  | agtatcgctt  |
| 3901 | ctcttcccg  | gtatacttgc  | caacgtttta  | tggtcacatc  | tacaaacgta  | ggatctagct  |
| 3961 | ctatcgttct | acagattctt  | cctgtcctct  | cacatgcaat  | caatgtactt  | ccagaaccac  |
| 4021 | taaatggatc | aagaactata  | tcccctggtc  | caactgctgt  | tactatcgct  | ctctccatta  |
| 4081 | actccactgg | tttcatcggt  | gggtgcagtg  | agttgtacgt  | tggcttatcg  | taaaaccaga  |
| 4141 | gatcactttg | attacgtccc  | ccatgccact  | cacgtttatt  | gccatttttc  | caaccgtaga  |
| 4201 | gtattgtttc | gtattgtctt  | tgataatcag  | atcttcctag  | cgtaaaatga  | ttctttgccc  |
| 4261 | aaatgatgaa | tgctgcacaa  | cgaccacctg  | cttcttcaaa  | taccttttgc  | agcgttgcca  |
| 4321 | gctcggatga | tgatgcacag  | atgtaaaattg | cacctttggg  | gtacgctaaa  | acgtgagaac  |
| 4381 | aaatgtcata | cagaaaaagt  | tcgtattttt  | caccttgatc  | atcgtttagt  | atttttttgt  |
| 4441 | cttctctttc | ctgactgtca  | ccatatgcta  | agttatacgg  | agggtcacac  | acggtaatat  |
| 4501 | ctgccatttt | atcgccaggt  | accgctttta  | atgattcaac  | cagacaacta  | tcaccacagt  |
| 4561 | agattcgatg | accacctaata | atccacagat  | cccctgggtt  | cgacactact  | gactttttat  |
| 4621 | cgaccaattc | cacccctctt  | ttttctctct  | tttctacttc  | ttcttttcca  | tcaatgttgt  |
| 4681 | cgagaaagcg | ttggactttt  | tccagctcaa  | atccagtcac  | tttaagggtc  | aactccaagt  |
| 4741 | cttctaactc | ttgaatttcc  | aacttcaaaa  | gatcatcgct  | ccactttgcc  | cagttagctg  |
| 4801 | attgattggc | aagtaaacga  | aaagctttgg  | tttgggcttc  | acttaagtta  | tcactgagga  |
| 4861 | ctacgggaat | actctccata  | cccagttttc  | ttgctgcttt  | aagtcttaaa  | tgaccatcaa  |
| 4921 | ccacagtgcc | atcgcttttt  | gcaactatcg  | gaatacga    | accaaactcc  | cggattgaag  |
| 4981 | cgcacattct | gtttactaca  | tcgtcattct  | tacgaggatt  | acgctcatat  | tcgacaagat  |
| 5041 | tttcaatagg | atagtagtgt  | attgctaagt  | tcatattagt  | ggaataattt  | attaaattac  |
| 5101 | tagtggagat | tcttaaggac  | ttgttaaaaa  | gttaataatt  | aaaaaacgtc  | tgacgctaga  |
| 5161 | gagggcccg  | gggttctgctc | ccaagtcgc   | cagtcctggc  | gaaaggaccc  | acttcctatg  |
| 5221 | tgttatctag | catattaaaa  | tctttactaa  | aattattaac  | atagaacatc  | aatgccaaag  |
| 5281 | catcagcttc | attatcgtct  | tgagggaaaa  | aacctttgcc  | ccttacagct  | tcaataactt  |
| 5341 | cacccttact | tgcattgcct  | ttgcctgcta  | tgaacggtt   | tatcgtcttc  | accggaacac  |
| 5401 | ctttgtatgg | tatatgatgc  | tcttcacacc  | aagcagttaa  | aatggcaaaa  | aaaccaccat  |
| 5461 | aacaatgtgc | agcgtcagta  | cctaaatgtc  | ttctcacttc  | ttcaaaatac  | actgcttcaa  |
| 5521 | tatctgaaaa | tctttccctc  | atctcattga  | gccacctacg  | aaaattttaag | aagtgcattc  |
| 5581 | cacctccgct | gaaacgggcta | ccatgaaagt  | ttttgctccc  | actttgaatt  | actccatctg  |
| 5641 | taagaatagc | ccagccgggt  | tgtttgccga  | gggtctagtgt | taagattgac  | atttgctata  |
| 5701 | attttaaact | gcaagtagca  | ctaaatatca  | tttggttcct  | tcaaaatac   | ctatgaatgg  |
| 5761 | gtttttattg | gccaatgaca  | agaatcttat  | gctactacct  | tagttaggac  | ttgctattat  |
| 5821 | atatattcac | cgattttaca  | aaaactgttc  | actttttttt  | aatttttctt  | tgcaaaagct  |
| 5881 | aaaaaacgtg | ctaaactcac  | ttgtgagttt  | actatacagc  | aatagaattg  | ctaagaatgc  |
| 5941 | catttattcg | agttctaaag  | ggcattatat  | gcgttctttg  | gtaatggtag  | tatttttagta |
| 6001 | ccctaaagtt | acatctagct  | ttaaaacaaa  | gtttttgcct  | catctaaaaa  | aatataaagc  |
| 6061 | tgtttcttct | caattacgta  | acttaccaaa  | aacctaaatt  | tcttttgctt  | tcttcaatct  |
| 6121 | tttcttggtt | gccgaattta  | agctttttgtg | tttgaagcac  | atctacactc  | aatgccctta  |
| 6181 | tactccggat | ttctcaccac  | tttttccggg  | attttctaaa  | aaaaagttta  | aataatttga  |
| 6241 | atgcagctaa | gaaattaaaa  | agagcctaaa  | ctttaagaac  | ccgctaaacg  | gaagtcggac  |
| 6301 | ctcctagaca | ccttactatt  | tgagttgttt  | ccattttgga  | aataactgtt  | tactggagct  |
| 6361 | gagaagaggt | cacatgaatt  | tttgataaaa  | cagatacttc  | ccctctatct  | agctcattaa  |
| 6421 | taagttataa | tagccctcta  | aagacgtttt  | aaagaattta  | gttgacagtag | agacaattaa  |
| 6481 | ttggttaaat | tcctattgat  | gatcaatggg  | ttgtttgtaa  | gttataggag  | atagataatg  |
| 6541 | gatgagaata | agattgtatt  | ttatactact  | ccaggtggaa  | atatagaaat  | tgaagtttta  |
| 6601 | tgagagatg  | aaaatctttg  | gcttacgcaa  | aaaaggatgg  | ctgaattatt  | tgatgtacaa  |
| 6661 | ctgccagcta | ttagtaagca  | tatcaagaac  | atatttgaat  | ctgggtgaatt | acaggaaaaa  |
| 6721 | gaagttgttt | ccacttttga  | ggtaaccgct  | gcagacggta  | aaaattaccc  | aacacaactt  |
| 6781 | tacaatttag | atacaattat  | agctgtttgg  | tatcgagtta  | attctaaaaa  | agcaacatta  |
| 6841 | ttcagagtat | gggctacaaa  | agttttgaag  | gattttatta  | tcaaaggatt  | tgcttttagat |
| 6901 | agtgaacgac | taaaaaacgg  | gaaaaagttt  | ggcaaagact  | acttcgagga  | gctatagctc  |
| 6961 | ataaattttc | tgagctcaa   | ggaaaaacta  | agatagttaa  | aatattaata  | caagtaggca  |
| 7021 | aaacgggtaa | attgaatccg  | gttgcaaaa   | taattccaat  | aaatatagga  | ggggttctca  |
| 7081 | ttacaagggg | aaatttgcac  | aataaggatg  | aaattaagcg  | taaggacata  | agggaaggag  |
| 7141 | atattgtaac | aatcaaaagg  | gcaggagatg  | tgattcctaa  | aattatagat  | gtagataaaa  |

```

7201 gtgctcgttc tcgaaaagca ccaaagtttg tttttcctga tatttgcccg gaatgtggca
7261 gtagagttga tgactgggaa gctacgatta gatgtaccgg agaaaacggt tgcccagcac
7321 agcgaatagg aaagttaaaa cttttgtggt aggttcttga cattaaagggt tttggcggta
7381 aacaagtgga gttcctttat gaccttggtt tgataaggaa aatatctgat atttttgctc
7441 tcgaagaaaa actcaaaaat ttcaacttaa gtgaacaaag gggatgggat aaacaatcca
7501 tatttaattt attgcactct atcaacagca aaagaactgt aacgcttgaa aagtttataa
7561 cttctttggg aattaaattg gtcggaccac acgtagcaaa attactagca aacattatc
7621 aatcttatga aaattggatg gctcaattac cttatgatag agaagctcct gataaattaa
7681 tgataatagg cgtaggcgaa gagaccataa cttccttgga ggaatttttc tctgatgagg
7741 ataagtgtga aatggtaaag aatctcgctt ctcaactaaa gattgagcct gtaagtgcta
7801 aattcccctc ttagcggcaa aacagtgggt atcacaggag aattatcagg aatgaaaaga
7861 aaggaagcgc aagcaaaagc cgaatcttta ggtgtaaaag ttagctctag tgtgtccaaa
7921 aatacggatt ttgtggttat aggtaaagat ccagggtcaa agtatcaca agctttggag
7981 ctaggtgttg aaattttaag tgaggaggaa tttaataaac taatcatgag agaaaaataa
8041 acgctattat ttctataacc ttcttcata ctgaaagcct caaatcaaca agtagcaatt
8101 ttcttttcgt tagattgcag ctcaactgct agaaaaatgt acataaaaaa gaggcttaca
8161 gcagatgcc aaactctac aacaatccat tttgtcgaaa actaaaataa tcgtcgctg
8221 taatgataat atgatcaaga aatttgatac ctacactatg acacgctaaa gctaaactct
8281 tagtcatggt tttatcagct tcagatgggt tttcacttcc gccgggatgg ttatgtgaaa
8341 ttacgattga tgttgatatt tttaataatg ctttttttat tatttcctt gtatagacag
8401 gcgcctgcca gcaaataact cttcccctat caaatggcac ctttgattca aatacattat
8461 tgtaatatct tccttatctg aatagccgat acttaccctt aaatattcta taagcttatc
8521 taggttatct agtatcggcc ctttttttag ctcttccttt aataccctag tcaaagtttc
8581 cttgacacaa aaaatcattg aaactgtaga gtctgctaca cttctatac ttttcagctc
8641 atccatttcg cgacctaaaa tccttcctat ccctgtacaa gtatccacta ggtttttagc
8701 aattgcttga gcctgggccc tatcatgcac tgcactcaga aatgtttcta ttatttcacg
8761 atcaagcaga gccttcctt tgctttccaa gattctgaat tctatttctt ttttacgttt
8821 attttcttct ttacttttat tctaattatt catataatac acccttcact aataataaat
8881 tatttttaaa tgtttactat tattttctta gcagtattgg catgaagcca tagcttacgg
8941 gtgaagtcaa atcaattttt caattttttt ttgtttattt ttttatgaaa aagtagaaga
9001 tattaatagc tgctaatttc tttaaacgat gtcgtttag attcgtattt ttatacacca
9061 aaaagcgtat ctttgatgtc tcct

```

//

```

LOCUS      JAQZAU010000112      40382 bp      dna      linear      ENV 17-MAR-2023
DEFINITION MAG: Wolbachia pipientis isolate wEsol contig_54966, whole genome
            shotgun sequence.
ACCESSION  JAQZAU010000112  JAQZAU010000000
VERSION    JAQZAU010000112.1
DBLINK     BioProject: PRJNA929258
            BioSample: SAMN33142973
KEYWORDS   WGS; ENV; Metagenome Assembled Genome; MAG.
SOURCE     Wolbachia pipientis (insect metagenome)
ORGANISM   Wolbachia pipientis
            Bacteria; Pseudomonadota; Alphaproteobacteria; Rickettsiales;
            Anaplasmataceae; Wolbachieae; Wolbachia.
REFERENCE  1 (bases 1 to 40382)
AUTHORS    Fiutek,N., Couger,B.M., Roy,S., de la Torre,J.R. and Connor,E.F.
TITLE      Genomic assessment of the contribution of the Wolbachia
            endosymbiont of Eurosta solidaginis to gall-induction
JOURNAL    International Journal Molecular Sciences
REFERENCE  2 (bases 1 to 40382)
AUTHORS    Fiutek,N., Couger,B.M., Roy,S., de la Torre,J.R. and Connor,E.F.
TITLE      Direct Submission
JOURNAL    Submitted (10-FEB-2023) Biology, San Francisco State University,
            1600 Holloway Ave, San Francisco, CA 94132, USA
COMMENT    ##Genome-Assembly-Data-START##
            Assembly Date      :: JUN-2019
            Assembly Method    :: FLYE v. 06-2019
            Genome Representation :: Full
            Expected Final Version :: Yes

```

Genome Coverage :: 100.0x  
Sequencing Technology :: Illumina HiSeq; PacBio Sequel  
##Genome-Assembly-Data-END##

FEATURES  
source Location/Qualifiers  
1..40382  
/organism="Wolbachia pipientis"  
/mol\_type="genomic DNA"  
/submitter\_seqid="contig\_54966"  
/isolate="wEsol"  
/isolation\_source="galls on Solidago altissima"  
/host="Eurosta solidaginis MN-2018-EFC"  
/db\_xref="taxon:955"  
/environmental\_sample  
/country="USA: Cowling Arboretum, Carleton College,  
Northfield, MN"  
/lat\_lon="44.48 N 93.13 W"  
/altitude="280 m"  
/collection\_date="2018-11"  
/metagenome\_source="insect metagenome"  
/note="metagenomic"  
gene complement(<1..1227)  
/locus\_tag="wEsol\_01299"  
CDS complement(<1..1227)  
/locus\_tag="wEsol\_01299"  
/codon\_start=1  
/transl\_table=11  
/product="hypothetical protein"  
/pfam="Pfam-B\_5362 Pfam-B\_5362 Pfam-B\_5362 Pfam-B\_13703"  
/translation="MNGGVSGKEKVIRTPFDKFEPYSDWRQIFKRPNQYNPNSNYDSS  
SEINEHDIETQKIEEGDGHDSGISSDDEDDRTTYTAVQLTNDSLDSQRYTGICIPTPT  
DGWVGENNHTGLSGNLPDGSNNPQIFKSDPLQHGSGNGLGYNFNDYSQATCSKLSASD  
QEEGQGYSLGDSCESENLTGAGGSNQTFEGEQKSSEFPKVDNWSDDGNSSEDSSDC  
GDNDVGHYDTCGKRYSHLSFHDENTNIIKKDSFSLAQIELNKAKEKYESIWQEMDK  
ILSNSDEAGECEEDDIGKLKGRLEVISQALEQGIMFTFPYKDGESFVDRIINTTQEL  
YWVDSTENSRLLEKKILQVISEGATLNKFTKERYDDYVNCIYREKEILSQRNKNILG  
LNNLAYESIVNKSQTQ"  
/besthit="qcoverage 124.694376528117 , hcoverage  
75.5555555555556 , similarity 73.7 , identity 69.2 ,  
evaluate 6.97e-217 , alnlength 510 , Bacteria ,  
Proteobacteria , WP\_065094712.1 MULTISPECIES:  
hypothetical protein [unclassified Wolbachia]"  
gene complement(1401..3353)  
/locus\_tag="wEsol\_01300"  
CDS complement(1401..3353)  
/locus\_tag="wEsol\_01300"  
/codon\_start=1  
/transl\_table=11  
/fullproduct="qcoverage 100 , hcoverage 100 , similarity  
99.8 , identity 99.8 , evaluate 0.0 , alnlength 650 ,  
Bacteria , Proteobacteria , WP\_174516769.1 heme lyase  
CcmF/NrfE family subunit [Wolbachia endosymbiont of  
Cardiocondyla obscurior]"  
/cog="CcmF COG1138 648 Cytochrome c biogenesis factor"  
/pfam="Cytochrom\_C\_asm"  
/tigr="TIGR00353 nrfE 578 cytochrome c-type biogenesis  
protein CcmF"  
/product="heme lyase CcmF/NrfE family  
subunit"  
/translation="MPELGNILLLLACLLSLTYLFLPLSSCRFITTAIFFCVSTSMAL  
LIYCHITNDFSLENVYYHSHTTKPLIYKICGVWGNKEGSMLLWTLVLTFYLFMLGIFI

DNGSKLKKVSLITQGLICFCFLFLTLESSPFTKMPGIETDGLGFNPILQDIGLAIHP  
 PILYLGYLGFVPSLSIAGLIAKVEGNVWAKIVRPWVLISWSLLTLGISLGSWWAYR  
 ELGWGGFWFWDPVENVSLMPWLIATVLTHTLLLVVRNFNVLKNFAILLTLTTFILSVTG  
 TFLVRSGLTSHVTFADDPYGLYLALALLGVFTVSSLVIFVVFTRKNHTSAMSFCQCVT  
 LESEKKLATQVTEGRRLFSRLTMMLMNNLLFITAFFIVFVGTLYPTVLEYLTGELISV  
 GAPYYNSLFNPIALAILALTIIGQYCSWQGNSLLPIFREYRFSFCSAAAILPFIFHME  
 LIIVLSITISIALLIFFVLEAYSKRIRLFKSESILLAKKVSYSYAMMAAHAGVAILVL  
 GIAYSVGWQEKKENYLKIGDSITVNKFKVTLRNIELIKEKNFHAVRGTMDIRNLLNNK  
 ILGEITPEYRFYLVGEQKNVESSYHNLFSDIYVVIGEIDKSKSKIAAKVHYKPGMSI  
 IWFGSFLIAFGSLLAAPPFSGRARIV"  
 /besthit="qcoverage 100 , hcoverage 100 , similarity 99.8  
 , identity 99.8 , evalue 0.0 , alnlength 650 , Bacteria ,  
 Proteobacteria , WP\_174516769.1 heme lyase CcmF/Nrfe  
 family subunit [Wolbachia endosymbiont of Cardiocondyla  
 obscurior]"  
 gene 3666..4907  
 /locus\_tag="wEsol\_01301"  
 CDS 3666..4907  
 /locus\_tag="wEsol\_01301"  
 /codon\_start=1  
 /transl\_table=11  
 /pfam="Pfam-B\_299"  
 /fullproduct="qcoverage 100 , hcoverage 100 , similarity  
 100 , identity 100 , evalue 1.04e-285 , alnlength 413 ,  
 Bacteria , Proteobacteria , WP\_015588878.1 MULTISPECIES:  
 hypothetical protein [unclassified Wolbachia]"  
 /translation="MGTTKISKFPFNIKGVAKQHAEPPIIEKNLYTILGFKDIEDFEN  
 KTSKLVNKKVWQSFDVCFKIDYAAATEKVVSIVCNIAKSDRGDAFTKAERLILNEK  
 QGDKKREKAIREAISILRKINPEKAFNELSVIKKQAEFLQTDIFYKAQSKPLQGFAPS  
 GGQLFAEVLKYIETLEKLAEVKKEELVKDFLLNHVSSLNKKYPKSQGKREDAITILSS  
 DELKNFYNGVKEGILQPMVSYKGCRLYDKMNQIKNESKSIKREEREENLKKIDKS  
 IISAINDIKKHREAILNCKDFQNSYIKEKKEHPFRGNACQKMIDIYQERIVGYQEKIR  
 QNLNQIKAILKSAPQEMDDVEELEEIIDIGIHEAKQFDEDFDSALICLSNMQNELDIQL  
 ENPPTELRVSHINVKTELTRL"  
 /product="hypothetical protein"  
 /besthit="qcoverage 100 , hcoverage 100 , similarity 100  
 , identity 100 , evalue 1.04e-285 , alnlength 413 ,  
 Bacteria , Proteobacteria , WP\_015588878.1 MULTISPECIES:  
 hypothetical protein [unclassified Wolbachia]"  
 gene 5022..6347  
 /locus\_tag="wEsol\_01302"  
 CDS 5022..6347  
 /locus\_tag="wEsol\_01302"  
 /codon\_start=1  
 /transl\_table=11  
 /fullproduct="qcoverage 100 , hcoverage 100 , similarity  
 100 , identity 100 , evalue 0.0 , alnlength 441 ,  
 Bacteria , Proteobacteria , WP\_141456873.1 MULTISPECIES:  
 dihydroorotase [unclassified Wolbachia]"  
 /cog="PyrC COG0044 430 Dihydroorotase and related cyclic  
 amidohydrolases"  
 /pfam="Amidohydro\_5 Amidohydro\_4 Amidohydro\_1 DHOase"  
 /tigr="TIGR00857 pyrC\_multi 412 dihydroorotase,  
 multifunctional complex type"  
 /product="dihydroorotase"  
 /translation="MTQTNLLQTGQKEGYKIAYTNARIIDPETKLDIKGSLLTEGDK  
 IVDFGESLFSTSGVDETIDCKGLVLMPLIDIHVHFREPGQEHKETIYTGSKSAAAGG  
 VTTVVCQPNTIPAIDSVVLAKYLYRALETSHVNVEFYAKITTSEEKLTETALLKEAG  
 AVGFTDDGMPVMNPMIMRQALLYSSMLGVPIAQHAEDLNLSSAGGAINEGKISEELGVK  
 GILSASESVMVSRDILLMKDMENVHYHILHVSSKDSLDAIKRAKDLGLNVTCEVTPHH

```

FTLTEDIVKQHGAIAKMNPPLRTEEDRLAMVEGLKTGVIDCIATDHAPHDRSSKDLPL
ENAAFGIVGLETMLPLSLELYHSGQMGLLDVLAKLTYKPADIHPRGRIQKNLAADL
ILVDLNHEWEIKTDNFASKSKNSPFDGRKVKGHVVRTVVSCKTIYSQKS"
/besthit="qcoverage 100 , hcoverage 100 , similarity 100
, identity 100 , evalue 0.0 , alnlength 441 , Bacteria ,
Proteobacteria , WP_141456873.1 MULTISPECIES:
dihydroorotase [unclassified Wolbachia]"
gene 6546..7730
/locus_tag="wEsol_01303"
CDS 6546..7730
/locus_tag="wEsol_01303"
/codon_start=1
/transl_table=11
/fullproduct="qcoverage 100 , hcoverage 100 , similarity
100 , identity 100 , evalue 8.89e-266 , alnlength 394 ,
Bacteria , Proteobacteria , WP_015588880.1 MULTISPECIES:
dicarboxylate/amino acid:cation symporter [unclassified
Wolbachia]"
/cog="GltP COG1301 415 Na+/H+-dicarboxylate symporters"
/pfam="SDF"
/product="
dicarboxylate/amino acid:cation symporter"
/translation="MHKFAILFSILLAIVAYYLNNEVIFEIAKLFSDFVSLKLISL
PLVFLSIVSTISGLKDSIEIKTLVKKTLFYTLTTIIAFAVLSFYLLIDPARKNFIS
NTIGSVNSNNHSYFSYLKSLIPSNFVQVFLENNIIGSILIAFLMGGAIISLSKEKQDI
LHQIFSALFDTLKIAQGLLKFIPLAVWSFITCFLHELKGGSEFYNNLWYFVCIMSAN
FVQAFLILPLLMWYKGISPIQTLRGVMPALTLAFFSKSSSATLPTTIECVQNKLVKPK
KLSSFILPICTTINMNACAAFILITVMEFVAEMNGYAFSLSEMLIWIWIFLATGAAIGNAG
VPMGCYFMATSYLVSMNVPLHIMGLILPIYTIIDMFETAINVWSDICITQIINKECNS
ET"
/besthit="qcoverage 100 , hcoverage 100 , similarity 100
, identity 100 , evalue 8.89e-266 , alnlength 394 ,
Bacteria , Proteobacteria , WP_015588880.1 MULTISPECIES:
dicarboxylate/amino acid:cation symporter [unclassified
Wolbachia]"
gene 7734..8330
/locus_tag="wEsol_01304"
CDS 7734..8330
/locus_tag="wEsol_01304"
/codon_start=1
/transl_table=11
/fullproduct="qcoverage 100 , hcoverage 100 , similarity
100 , identity 100 , evalue 2.09e-134 , alnlength 198 ,
Bacteria , Proteobacteria , WP_015588881.1 MULTISPECIES:
orotate phosphoribosyltransferase [unclassified
Wolbachia]"
/cog="PyrE COG0461 201 Orotate phosphoribosyltransferase"
/pfam="Priboyltran Pfam-B_9324"
/tigr="TIGR01367 pyrE_Therm 187 orotate
phosphoribosyltransferase"
/product="orotate
phosphoribosyltransferase"
/translation="MILDENNLIKEFKEAEAILHGHFVLSSGLHSGTYIQCAKIFEN
PSRAMKVCALLADKIKKELNSSIDLILSPAIGGIIVGYEIGRQLGIKTMFCERVNGKF
ELRRGFEIKKGKILLIEDVITTKSSLEAVECAEGEGGKVVAEASLIKRNSETKLPF
PVISLIELNIKNYSEELPSELKQLPITKPGSREYLTK"
/besthit="qcoverage 100 , hcoverage 100 , similarity 100
, identity 100 , evalue 2.09e-134 , alnlength 198 ,
Bacteria , Proteobacteria , WP_015588881.1 MULTISPECIES:
orotate phosphoribosyltransferase [unclassified

```

```

gene      Wolbachia]"
          8428..8820
          /locus_tag="wEsol_01305"
CDS       8428..8820
          /locus_tag="wEsol_01305"
          /codon_start=1
          /transl_table=11
          /product="hypothetical protein"
          /pfam="GTP_EFTU Septin MMR_HSR1 Miro Dynamin_N"
          /tigr="TIGR01394 TypA_BipA 594 GTP-binding protein
          TypA/BipA"
          /translation="MNEFKSIRNIAIIAHVDHGKTTLLDNMLKQSGTFRENQEVQERV
          MDSDGQERERGITILAKCTSIMWGDEKINIIDTPGHADFGGEVERVLCMADGVLLLV
          AAEGPNATNKICALKSTKSKFEANCDNQ"
          /cog="TypA COG1217 603 Predicted membrane GTPase involved
          in stress response"
          /besthit="qcoverage 95.3846153846154 , hcoverage
          60.4878048780488 , similarity 91.1 , identity 88.7 ,
          evalue 7.72e-70 , alnlength 124 , Bacteria ,
          Proteobacteria , POG52277.1 GTP-binding protein TypA,
          partial [Wolbachia sp. wRi_2]"
gene      8768..10258
          /locus_tag="wEsol_01306"
CDS       8768..10258
          /locus_tag="wEsol_01306"
          /codon_start=1
          /transl_table=11
          /fullproduct="qcoverage 100 , hcoverage 81.4449917898194
          , similarity 100 , identity 99.8 , evalue 0.0 , alnlength
          496 , Bacteria , Proteobacteria , WP_015588882.1
          MULTISPECIES: translational GTPase TypA [Wolbachia]"
          /cog="TypA COG1217 603 Predicted membrane GTPase involved
          in stress response"
          /pfam="GTP_EFTU GTP_EFTU_D2 EFG_C"
          /tigr="TIGR01394 TypA_BipA 594 GTP-binding protein
          TypA/BipA"
          /product="translational GTPase TypA"
          /translation="MLSKALKANLKPIVIINKVDRPDSRIDEVLNEIYELFFNLDATN
          EQLDFFPLYASGRNGWCAKELSDERKDLSPFLSTVIDYIKPSVYDQNAFFAMLVTLLE
          SDKFLGRILTGKVVYQGVAVNSDLKVLDDLKGKVIERGRLTKLLSFSGLKRIPEQAVA
          GDIIAIAGLEEASVSDTIAAPEVTTAVSSTPVDPPTMAITLSVNDSPFAGQEGTKLTS
          TAIKDRLYAEAEETNVAITVTLAPSGEAFEVGGRGELQLGVLIENMRREGFELSFSRPR
          VLFKEEGGKKLEPIEEVVIDVDDEYSIGIMEKLSFRKGEVTDMPSPGNRTRLTFLVP
          SRGLIGYQGEFLTDSRGTGIINRLFHSYAPHRGPISGRRNGVLISTDKGEAVAYAIFFN
          LQDRGIMFIKPQDKVYCGMVVGQHSRDNDLEINVLKGKQLTNVRASGSDEAIKLTPPK
          IMTLEDMIAYIDDELVEVTPKSIIRLRKKFLDPNERKRAGRAKNKE"
          /besthit="qcoverage 100 , hcoverage 81.4449917898194 ,
          similarity 100 , identity 99.8 , evalue 0.0 , alnlength
          496 , Bacteria , Proteobacteria , WP_015588882.1
          MULTISPECIES: translational GTPase TypA [Wolbachia]"
gene      10321..10764
          /locus_tag="wEsol_01307"
CDS       10321..10764
          /locus_tag="wEsol_01307"
          /codon_start=1
          /transl_table=11
          /pfam="PDDEXK_2"
          /fullproduct="qcoverage 100 , hcoverage 100 , similarity
          100 , identity 100 , evalue 1.67e-97 , alnlength 147 ,
          Bacteria , Proteobacteria , WP_015588883.1 MULTISPECIES:

```

```

PD-(D/E)XK nuclease family transposase [Wolbachia]"
/translation="MAFSKFLDPKNNFAFKRIFGTEKNKDILIHFLNDILGFAGKDEI
EEIEFLSTIMDAEIASKKQSIVDVFCTDSAGTQLIEMVRPESLRSYCLKGEEFLQKE
TKRVLKLIKPDVLPSESTHQCESGNRLVPSDADNEPPLEKEDAQS"
/product="PD-(D/E)XK
nuclease family transposase"
/besthit="qcoverage 100 , hcoverage 100 , similarity 100
, identity 100 , evalue 1.67e-97 , alnlength 147 ,
Bacteria , Proteobacteria , WP_015588883.1 MULTISPECIES:
PD-(D/E)XK nuclease family transposase [Wolbachia]"
gene 11475..11822
/locus_tag="wEsol_01308"
CDS 11475..11822
/locus_tag="wEsol_01308"
/codon_start=1
/transl_table=11
/fullproduct="qcoverage 100 , hcoverage 100 , similarity
100 , identity 100 , evalue 2.74e-74 , alnlength 115 ,
Bacteria;Eukaryota , Proteobacteria;Arthropoda ,
WP_155968342.1 MULTISPECIES: IS630 transposase-related
protein [Wolbachia]"
/cog="COG3415 COG3415 138 Transposase and inactivated
derivatives"
/pfam="HTH_Tnp_IS630 HTH_Tnp_1 HTH_23 HTH_28 HTH_29 HTH_7
CENP-B_N Pfam-B_14738 HTH_8 HTH_17 HTH_24 Pfam-B_2106"
/product="IS630
transposase-related protein"
/translation="MAYSVDLRERAVSMIEKGKSKVEVAELLEIGIATLYRWLRKKAA
GESLRPSKNGSFIRKIDPKILEEYVKNPDHTLAEMKQNLGFGINSIWYRLKQLRITL
KKSYSITISRAQSRR"
/besthit="qcoverage 100 , hcoverage 100 , similarity 100
, identity 100 , evalue 2.74e-74 , alnlength 115 ,
Bacteria;Eukaryota , Proteobacteria;Arthropoda ,
WP_155968342.1 MULTISPECIES: IS630 transposase-related
protein [Wolbachia]"
gene 12022..12333
/locus_tag="wEsol_01309"
CDS 12022..12333
/locus_tag="wEsol_01309"
/codon_start=1
/transl_table=11
/fullproduct="qcoverage 100 , hcoverage 100 , similarity
100 , identity 100 , evalue 1.60e-74 , alnlength 103 ,
Bacteria , Proteobacteria , WP_155968470.1 transposase
[Wolbachia pipientis]"
/cog="COG3335 COG3335 132 Transposase and inactivated
derivatives"
/pfam="DDE_3 DDE_1"
/product="transposase"
/translation="MTFKGGCDKEVFNTWLEKMLLPKLPHGTTIVMDNATFHKTPKTK
ELIDNARCRLLYLPTYSFDLNPIDHCWNTIKSRLRPLMHKYTDLQLLVGNTIMEIYHS
F"
/besthit="qcoverage 100 , hcoverage 100 , similarity 100
, identity 100 , evalue 1.60e-74 , alnlength 103 ,
Bacteria , Proteobacteria , WP_155968470.1 transposase
[Wolbachia pipientis]"
gene complement(12330..12458)
/locus_tag="wEsol_01310"
CDS complement(12330..12458)
/locus_tag="wEsol_01310"

```

```

/codon_start=1
/transl_table=11
/product="hypothetical protein"
/translation="MLLKSFQQLFSKPKAQHGGSGRRVAANNLLSHSLETLEYSIF"
/besthit="qcoverage 90.4761904761905 , hcoverage
56.7164179104478 , similarity 100 , identity 100 , eval
3.38e-17 , alnlength 38 , Bacteria , Proteobacteria ,
WP_213862875.1 hypothetical protein [Wolbachia
endosymbiont of Rhagoletis cerasi]"
gene complement(12458..13072)
/locus_tag="wEsol_01311"
CDS complement(12458..13072)
/locus_tag="wEsol_01311"
/codon_start=1
/transl_table=11
/pfam="DUF1016"
/fullproduct="qcoverage 100 , hcoverage 97.1428571428571
, similarity 100 , identity 100 , eval 1.02e-143 ,
alnlength 204 , Bacteria , Proteobacteria ,
WP_227738579.1 DUF1016 domain-containing protein
[Wolbachia endosymbiont of Drosophila simulans]"
/translation="MVMQIELGLHKRQKAITNFKEKLPSPQSDLAHYTLKDPYIFDF
LSIGKDAHEREVEKGLVGHMEKFLLELGEGFAFVGRQFHLDVGNKDFYIDLLFYHLKL
RCFVVIELKDKDFKPEYAGKMNFYLSAVDDLKHXSTDQPSIGLILCKSKDDVLAKYTL
RDMNKPIGLAEYRITENLPENIKTALPTIEELEAELSKISDEEK"
/product="DUF1016 domain-containing
protein"
/besthit="qcoverage 100 , hcoverage 97.1428571428571 ,
similarity 100 , identity 100 , eval 1.02e-143 ,
alnlength 204 , Bacteria , Proteobacteria ,
WP_227738579.1 DUF1016 domain-containing protein
[Wolbachia endosymbiont of Drosophila simulans]"
gene complement(13077..13481)
/locus_tag="wEsol_01312"
CDS complement(13077..13481)
/locus_tag="wEsol_01312"
/codon_start=1
/transl_table=11
/fullproduct="qcoverage 100 , hcoverage 100 , similarity
100 , identity 100 , eval 3.23e-91 , alnlength 134 ,
Bacteria , Proteobacteria , WP_227738580.1 DUF1016
N-terminal domain-containing protein [Wolbachia
endosymbiont of Drosophila simulans]"
/cog="COG4804 COG4804 159 Predicted nuclease of
restriction endonuclease-like fold"
/pfam="DUF1016"
/product="DUF1016 N-terminal
domain-containing protein"
/translation="MTKIIGKEYTEFLEQLKDRIATSRKAAALAVNSKLILLYHYIGT
EILKRQREHGWGAKVIDQLSKDLRSTFPFEMKGFSTRNLKYMRFKFAEEYPDFVQVEPL
AQLTWYHNITLLEKIESHEIRLFYVKKAIET"
/besthit="qcoverage 100 , hcoverage 100 , similarity 100
, identity 100 , eval 3.23e-91 , alnlength 134 ,
Bacteria , Proteobacteria , WP_227738580.1 DUF1016
N-terminal domain-containing protein [Wolbachia
endosymbiont of Drosophila simulans]"
gene 13653..14273
/locus_tag="wEsol_01313"
CDS 13653..14273
/locus_tag="wEsol_01313"

```

```

/codon_start=1
/transl_table=11
/pfam="Pfam-B_9352"
/fullproduct="qcoverage 100 , hcoverage 100 , similarity
100 , identity 100 , evalue 5.39e-125 , alnlength 206 ,
Bacteria , Proteobacteria , WP_015588888.1 MULTISPECIES:
hypothetical protein [unclassified Wolbachia]"
/translation="MRFFYSNYILFLSSCGFLLFSLPSTKAQTNDTSVVSIPQRKKET
VGHTVVAQPRQIIEMQEEVIINEGKEFIPVPKRKKSVEKKLRDVKAEKNEIGNEKSV
ESKKDELVVTEIINSIRDKLTWCWSIPESIAAYKENFSIKINLLLSSQGEIIMADIADS
SSYRDNPLFRSIADNAMRAVYKCSPLTGLPIQHWHIWRVTLDFIL"
/product="hypothetical protein"
/besthit="qcoverage 100 , hcoverage 100 , similarity 100
, identity 100 , evalue 5.39e-125 , alnlength 206 ,
Bacteria , Proteobacteria , WP_015588888.1 MULTISPECIES:
hypothetical protein [unclassified Wolbachia]"
gene complement(14478..14816)
/locus_tag="wEsol_01314"
CDS complement(14478..14816)
/locus_tag="wEsol_01314"
/codon_start=1
/transl_table=11
/pfam="Pfam-B_5905 Pfam-B_10889 SmpA_OmlA Pfam-B_960
Pfam-B_17238 Pfam-B_2938"
/fullproduct="qcoverage 100 , hcoverage 100 , similarity
100 , identity 100 , evalue 2.57e-73 , alnlength 112 ,
Bacteria , Proteobacteria , WP_006279908.1 MULTISPECIES:
outer membrane protein assembly factor BamE [Wolbachia]"
/translation="MRVLISFILLFTVSCHTIHNHGAPGISVELWSKIKVGDDKEKV
VHTLGSPTLVSKFDDNVWYVSYKIKQANFLGKRKYSSKSLQISFDQDGKVEDTKETD
ILERSLAVSD"
/product="outer membrane
protein assembly factor BamE"
/besthit="qcoverage 100 , hcoverage 100 , similarity 100
, identity 100 , evalue 2.57e-73 , alnlength 112 ,
Bacteria , Proteobacteria , WP_006279908.1 MULTISPECIES:
outer membrane protein assembly factor BamE [Wolbachia]"
gene 14948..15937
/locus_tag="wEsol_01315"
CDS 14948..15937
/locus_tag="wEsol_01315"
/codon_start=1
/transl_table=11
/fullproduct="qcoverage 100 , hcoverage 100 , similarity
100 , identity 100 , evalue 4.58e-242 , alnlength 329 ,
Bacteria , Proteobacteria , WP_006280119.1 MULTISPECIES:
ribonucleotide-diphosphate reductase subunit beta
[Wolbachia]"
/cog="NrdF COG0208 348 Ribonucleotide reductase, beta
subunit"
/pfam="Ribonuc_red_sm"
/tigr="TIGR04171 RNR_1b_NrdF 316
ribonucleoside-diphosphate reductase, class 1b, beta
subunit"
/product="
ribonucleotide-diphosphate reductase subunit beta"
/translation="MSLLEADPIYKPFNYPWAYDAWLQQQRIHWIPEEVPLADDVKDW
KTKLSSVEKNLLTQIFRFFTQADIEVNNCYMRHYSNIFKPTEICMMLASFNMETIHI
AAYSYLDDTIGMPESEYQAFLLKYDAMRKKYEMLEFEESKKHDKKHVAKTLAVFGAFT
EGLQLFASFALLNFQRFQGMKGMGQIIAWSARDETLHTNSIIMLFNTFIKENNEIWD

```

```

NEFKEELYSACRTIVELEDEFIKLAFDLGDVEGLSAEEVRNYIRYVANRRRLMQLGLES
IYDVNDNPIPWLDEILNGVEHTNFFENRVTEYSRAATQGTWEEAFTENDTNNK"
/besthit="qcoverage 100 , hcoverage 100 , similarity 100
, identity 100 , evaluate 4.58e-242 , alnlength 329 ,
Bacteria , Proteobacteria , WP_006280119.1 MULTISPECIES:
ribonucleotide-diphosphate reductase subunit beta
[Wolbachia]"
gene 16076..17206
/locus_tag="wEsol_01316"
CDS 16076..17206
/locus_tag="wEsol_01316"
/codon_start=1
/transl_table=11
/fullproduct="qcoverage 100 , hcoverage 100 , similarity
100 , identity 100 , evaluate 4.53e-243 , alnlength 376 ,
Bacteria , Proteobacteria , WP_015588889.1 MULTISPECIES:
cation:dicarboxylase symporter family transporter
[unclassified Wolbachia]"
/cog="GltP COG1301 415 Na+/H+-dicarboxylate symporters"
/pfam="SDF"
/product="
cation:dicarboxylase symporter family transporter"
/translation="MLQLLILLTVITSAAFFGHLVPMIEIKTFLYSVLSIKEVLLFIM
PFVIFALIFSSVNNLKQSAIKFILLLIIMIFLSNLASSLIAYSVGHFIIQNTYSIQDI
TYEETIVPLWSFRLPLLLSNFYALACGFVSSIVVSTLLPKKSKELSNKMLDLTLFILK
TFLTPIIPIFVLGLALKMQHDQVLSIIFKDYSIIFIIIASATYLYVFLLYGAANSFKV
TSWIASIGNMIPAFITAMSTMSSNATMPLTLEGSKKNVKQPDIASSVVPITASFHLVG
DCFFIIILSMIIASGYSLFTIDYVTFLLYFLLFKFAIVAVPAGGIMVMLPILEKHLKF
SPEMLSLITALYIVFDPIITSANVMGNGAFTMMFAKLYDKLK"
/besthit="qcoverage 100 , hcoverage 100 , similarity 100
, identity 100 , evaluate 4.53e-243 , alnlength 376 ,
Bacteria , Proteobacteria , WP_015588889.1 MULTISPECIES:
cation:dicarboxylase symporter family transporter
[unclassified Wolbachia]"
gene 17206..17790
/locus_tag="wEsol_01317"
CDS 17206..17790
/locus_tag="wEsol_01317"
/codon_start=1
/transl_table=11
/pfam="Pfam-B_7637 Peptidase_M22"
/fullproduct="qcoverage 100 , hcoverage 100 , similarity
100 , identity 100 , evaluate 3.11e-134 , alnlength 194 ,
Bacteria , Proteobacteria , WP_015588890.1 MULTISPECIES:
tRNA (adenosine(37)-N6)-threonylcarbamoyltransferase
complex dimerization subunit type 1 TsaB [unclassified
Wolbachia]"
/translation="MSILAITVIGIGSSIAIVDYGNCFVERNSASNSHAESFFKTLN
TLFNKHNINYDKIDHLAVVVGPGSFTGIRVGISAAQGINLATNKPLYGVSALEVQAYA
ISLLCKNSKKNIRAIKNAQGFTQLFDFNLLPLSGPTAACDPGHATSSSTHMDCNLNA
SHAGLLVHYRLKNKQKLNEVEALYLNPEQYMKLL"
/product="tRNA
(adenosine(37)-N6)-threonylcarbamoyltransferase complex
dimerization subunit type 1 TsaB"
/besthit="qcoverage 100 , hcoverage 100 , similarity 100
, identity 100 , evaluate 3.11e-134 , alnlength 194 ,
Bacteria , Proteobacteria , WP_015588890.1 MULTISPECIES:
tRNA (adenosine(37)-N6)-threonylcarbamoyltransferase
complex dimerization subunit type 1 TsaB [unclassified
Wolbachia]"

```

```

gene      complement(17785..18408)
          /locus_tag="wEsol_01318"
CDS       complement(17785..18408)
          /locus_tag="wEsol_01318"
          /codon_start=1
          /transl_table=11
          /pfam="AAA_18 AAA_33 Pfam-B_5209"
          /fullproduct="qcoverage 100 , hcoverage 100 , similarity
100 , identity 100 , evalue 4.71e-140 , alnlength 207 ,
Bacteria , Proteobacteria , WP_174516962.1 hypothetical
protein [Wolbachia endosymbiont of Cardiocondyla
obscurior]"
          /translation="MVNINTKKQPAGFFIHL SGLSGSGKLSTAI ELSNMIDALIVNSK
FYNNVQACSIYDGVFERDPIPKVQDRIYGIMQIMLQVIENYPIHSKNYIFIDELMEN
NDQNMRMYDSIVRLSKKMGTEILPVVLRCDLLTLQKRIALKRQRKNRRVINVNNVIEK
LRTNDSFIPPSAIEIENSNM SIKVAQEIVNQMHKLSQIACMQKNNL"
          /product="hypothetical protein"
          /besthit="qcoverage 100 , hcoverage 100 , similarity 100
, identity 100 , evalue 4.71e-140 , alnlength 207 ,
Bacteria , Proteobacteria , WP_174516962.1 hypothetical
protein [Wolbachia endosymbiont of Cardiocondyla
obscurior]"
gene      18692..19399
          /locus_tag="wEsol_01319"
CDS       18692..19399
          /locus_tag="wEsol_01319"
          /codon_start=1
          /transl_table=11
          /fullproduct="qcoverage 100 , hcoverage 99.5762711864407
, similarity 100 , identity 99.6 , evalue 2.71e-169 ,
alnlength 235 , Bacteria , Proteobacteria ,
WP_174516961.1 class II aldolase/adducin family protein
[Wolbachia endosymbiont of Cardiocondyla obscurior]"
          /cog="AraD COG0235 219 Ribulose-5-phosphate 4-epimerase
and related epimerases and aldolases"
          /pfam="Aldolase_II"
          /tigr="TIGR01086 fucA 214 L-fuculose phosphate aldolase"
          /product="class II aldolase/adducin family
protein"
          /translation="MLTKSRVKRDLVYAYQILSYLKFD DHTYTHLSVRSEDQKSFYIY
PFGMRFDEVDEHSLMKVSFDGDVVEGKEYQYNRTGYIIHG FVYQARKDIQAIFHLHTP
SIVAVSSSLKDGLLPISQWALHFY NKISYHNYNSLALSDTEGKR LIADLKENFVMLMRN
HGSITCGRSIQEAMFYTYHLEQACKTQCLTLAMNKELSIPSEE ICSKAVKDLLSFESN
LGERDWHAWVRLIKSKL"
          /besthit="qcoverage 100 , hcoverage 99.5762711864407 ,
similarity 100 , identity 99.6 , evalue 2.71e-169 ,
alnlength 235 , Bacteria , Proteobacteria ,
WP_174516961.1 class II aldolase/adducin family protein
[Wolbachia endosymbiont of Cardiocondyla obscurior]"
gene      19472..19606
          /locus_tag="wEsol_01320"
CDS       19472..19606
          /locus_tag="wEsol_01320"
          /codon_start=1
          /transl_table=11
          /fullproduct="qcoverage 100 , hcoverage 100 , similarity
100 , identity 100 , evalue 5.41e-20 , alnlength 44 ,
Bacteria , Proteobacteria , WP_007548354.1 MULTISPECIES:
IS3 family transposase [Wolbachia]"
          /cog="COG2963 COG2963 116 Transposase and inactivated

```

```

derivatives"
/pfam="HTH_Tnp_1"
/product="IS3 family
transposase"
/translation="MTNRREYTAEFKLEAVKLVKETGQASTKIAKDLGIDGSMLSKKI
"
/besthit="qcoverage 100 , hcoverage 100 , similarity 100
, identity 100 , evalue 5.41e-20 , alnlength 44 ,
Bacteria , Proteobacteria , WP_007548354.1 MULTISPECIES:
IS3 family transposase [Wolbachia]"
gene 19606..19752
/locus_tag="wEsol_01321"
CDS 19606..19752
/locus_tag="wEsol_01321"
/codon_start=1
/transl_table=11
/product="hypothetical protein"
/translation="MEKCLEHTHFQAKAPYDKERFDLKKELTRERDILEVVRKLVNSS
IFPL"
/besthit="qcoverage 72.9166666666667 , hcoverage
81.3953488372093 , similarity 97.1 , identity 94.3 ,
evalue 1.98e-14 , alnlength 35 , Bacteria ,
Proteobacteria , ONI56748.1 hypothetical protein
N500_0187 [Wolbachia pipientis wUni]"
gene complement(19732..20073)
/locus_tag="wEsol_01322"
CDS complement(19732..20073)
/locus_tag="wEsol_01322"
/codon_start=1
/transl_table=11
/fullproduct="qcoverage 100 , hcoverage 100 , similarity
100 , identity 100 , evalue 1.53e-79 , alnlength 113 ,
Bacteria , Proteobacteria , AAS13810.1 transposase, IS5
family, OrfB [Wolbachia endosymbiont of Drosophila
melanogaster]"
/cog="COG3293 COG3293 124 Transposase and inactivated
derivatives"
/pfam="DDE_Tnp_1_2 DDE_Tnp_1"
/product="transposase, IS5 family, OrfB"
/translation="MRTKYTKVKKMWADMGYQGRNLKNHIKEEYDIDIEIVKRPPCRF
WVHKDTPPELLPTREQGFKVQPRRWVVERTFAWVNRNRRLSKEYDLLTTSTENFIYLA
MSRVMLKREYA"
/besthit="qcoverage 100 , hcoverage 100 , similarity 100
, identity 100 , evalue 1.53e-79 , alnlength 113 ,
Bacteria , Proteobacteria , AAS13810.1 transposase, IS5
family, OrfB [Wolbachia endosymbiont of Drosophila
melanogaster]"
gene complement(20184..20564)
/locus_tag="wEsol_01323"
CDS complement(20184..20564)
/locus_tag="wEsol_01323"
/codon_start=1
/transl_table=11
/fullproduct="qcoverage 100 , hcoverage 100 , similarity
100 , identity 100 , evalue 1.16e-87 , alnlength 126 ,
Bacteria , Proteobacteria , AOV87106.1 transposase
[Wolbachia endosymbiont of Drosophila incompta]"
/cog="COG3293 COG3293 124 Transposase and inactivated
derivatives"
/pfam="DUF4096"

```

```

/product="transposase"
/translation="MRKKYPTDLSEREWARIEKHFRVSYKKGGRRPPKYSKREILEAIF
YVLR TGCQWRYLPNDFPLWKT VYEQFRQWKKQGIF EKMNYEITKYSRRKIGRNEQPSA
CIVDSQSVKTTEKGGSKAMMEVKK"
/besthit="qcoverage 100 , hcoverage 100 , similarity 100
, identity 100 , evalue 1.16e-87 , alnlength 126 ,
Bacteria , Proteobacteria , AOV87106.1 transposase
[Wolbachia endosymbiont of Drosophila incompta]"
gene complement(20606..20761)
/locus_tag="wEsol_01324"
CDS complement(20606..20761)
/locus_tag="wEsol_01324"
/codon_start=1
/transl_table=11
/product="hypothetical protein"
/pfam="DDE_3"
/translation="MTFKGGCDKEVFNTWLEKMLLPKLPHGTTIVMDNATFHKTPKTK
ELEVVRK"
/besthit="qcoverage 90.1960784313726 , hcoverage
44.6601941747573 , similarity 100 , identity 100 , evalue
4.03e-27 , alnlength 46 , Bacteria , Proteobacteria ,
WP_155968470.1 transposase [Wolbachia pipientis]"
gene complement(20961..21308)
/locus_tag="wEsol_01325"
CDS complement(20961..21308)
/locus_tag="wEsol_01325"
/codon_start=1
/transl_table=11
/fullproduct="qcoverage 100 , hcoverage 100 , similarity
100 , identity 100 , evalue 2.74e-74 , alnlength 115 ,
Bacteria;Eukaryota , Proteobacteria;Arthropoda ,
WP_155968342.1 MULTISPECIES: IS630 transposase-related
protein [Wolbachia]"
/cog="COG3415 COG3415 138 Transposase and inactivated
derivatives"
/pfam="HTH_Tnp_IS630 HTH_Tnp_1 HTH_23 HTH_28 HTH_29 HTH_7
CENP-B_N Pfam-B_14738 HTH_8 HTH_17 HTH_24 Pfam-B_2106"
/product="IS630 transposase-related protein"
/translation="MAYSVDLRERAVSMIEKGKSKVEVAELLEIGIATLYRWLRKKAA
GESLRPSKNGSFIRKIDPKILEEYVKKNPDHTLAEMKQNLGFGINSIWYRLKQLRITL
KKSYSISRQSR"
/besthit="qcoverage 100 , hcoverage 100 , similarity 100
, identity 100 , evalue 2.74e-74 , alnlength 115 ,
Bacteria;Eukaryota , Proteobacteria;Arthropoda ,
WP_155968342.1 MULTISPECIES: IS630 transposase-related
protein [Wolbachia]"
gene 21440..22162
/locus_tag="wEsol_01326"
CDS 21440..22162
/locus_tag="wEsol_01326"
/codon_start=1
/transl_table=11
/fullproduct="qcoverage 100 , hcoverage 100 , similarity
99.6 , identity 99.6 , evalue 1.57e-168 , alnlength 240 ,
Bacteria , Proteobacteria , WP_141456877.1 MULTISPECIES:
DNA repair protein RecO [unclassified Wolbachia]"
/cog="RecO COG1381 251 Recombinational DNA repair protein
(RecF pathway)"
/pfam="RecO_N RecO_N_2 RecO_C"
/tigr="TIGR00613 recO 239 DNA repair protein RecO"

```

```

/product="DNA repair protein RecO"
/translation="MRWKDEGIITIAAKKYGDKNLILSLFTKNHKGRRGLTKLTNNSNY
KFQISNLLHAERSAKLPENLGFFKCELIESPFFHHFFQDRLKSITIVSFSSILEKVLPE
SEPCAVLYDNFRYFIDVIKHNNQSWQSHYLNLELLLLLTQLGFKLDLSKCAVTGVKENL
QFISPKTGRAVSKKVGDIYADKLLPFPQMLHDVYNNTLQNSYSFQEFQLGLKVTGYFL
NKYLFLQLNVKFPELRNLMLSL"
/besthit="qcoverage 100 , hcoverage 100 , similarity 99.6
, identity 99.6 , evalue 1.57e-168 , alnlength 240 ,
Bacteria , Proteobacteria , WP_141456877.1 MULTISPECIES:
DNA repair protein RecO [unclassified Wolbachia]"
gene complement(22956..24338)
/locus_tag="wEsol_01327"
CDS complement(22956..24338)
/locus_tag="wEsol_01327"
/codon_start=1
/transl_table=11
/fullproduct="qcoverage 100 , hcoverage 100 , similarity
100 , identity 100 , evalue 0.0 , alnlength 460 ,
Bacteria , Proteobacteria , WP_015588886.1 MULTISPECIES:
PleD family two-component system response regulator
[unclassified Wolbachia]"
/cog="PleD COG3706 435 Response regulator containing a
CheY-like receiver domain and a GGDEF domain"
/pfam="Pfam-B_11357 Response_reg Pfam-B_18970
Response_reg GGDEF"
/product="PleD family two-component system response regulator"
/translation="MTAKILVVDDVLSNVKLLLEARLKAEEYTVIVAHDGEEAIDLVAK
QQPDIILLDIMPKMNGFEVCKELKSDPLTTHIPIIMVTALHDTHDRVQGINAGADDF
LTKPINKTALSARIKSLTRLKMIIDELRLRGETNAEIGGVAGNSIMDYSNQIFDANIL
VIDEDVHQAEQIYNILKQRFRSIKILSDPIEALKVGIENGYDLIISDMQFSKTDGLRL
CSEFRSKVETRYTPILILSEDYDKNNLVKALDVGANDYLTVPPLDEGELIARVNSQVKR
KRYQDALRMNLFNNAEMSIKDPLTNCYNRRYFDAHLRNIVKDSVEKDRRLSLMILDID
YFKMVNDSFGHSAGDELLKQIQRRISENIRVTDLLARFGGEEFVVVMPDTS DAYTI
AERIRKIIAKKPFILADKNTTHDVTVSIGIAEMQESDLNIIKEFIVRADKYLYKAKNS
GRNRVVTGYS"
/besthit="qcoverage 100 , hcoverage 100 , similarity 100
, identity 100 , evalue 0.0 , alnlength 460 , Bacteria ,
Proteobacteria , WP_015588886.1 MULTISPECIES: PleD family
two-component system response regulator [unclassified
Wolbachia]"
gene complement(24310..24606)
/locus_tag="wEsol_01328"
CDS complement(24310..24606)
/locus_tag="wEsol_01328"
/codon_start=1
/transl_table=11
/pfam="Pfam-B_16570"
/fullproduct="qcoverage 100 , hcoverage 100 , similarity
100 , identity 100 , evalue 8.55e-61 , alnlength 98 ,
Bacteria , Proteobacteria , WP_010082258.1 MULTISPECIES:
hypothetical protein [Wolbachia]"
/translation="MFNIGLSEILVVALVSIIVLDKNKVPVFIDFIKTIYRYFTIVRL
KARRLLKDAGIEDLYKECNTKEVNYIVGKNGKLYPTYDIDNTSKDNDSEDSGSR"
/product="hypothetical protein"
/besthit="qcoverage 100 , hcoverage 100 , similarity 100
, identity 100 , evalue 8.55e-61 , alnlength 98 ,
Bacteria , Proteobacteria , WP_010082258.1 MULTISPECIES:
hypothetical protein [Wolbachia]"
gene complement(24611..29362)
/locus_tag="wEsol_01329"

```

CDS

```
complement(24611..29362)
/locus_tag="wEsol_01329"
/codon_start=1
/transl_table=11
/fullproduct="qcoverage 100 , hcoverage 100 , similarity
100 , identity 100 , evaluate 0.0 , alnlength 1583 ,
Bacteria , Proteobacteria , WP_174516771.1 NAD-glutamate
dehydrogenase [Wolbachia endosymbiont of Cardiocondyla
obscurior]"
/cog="COG2902 COG2902 1592 NAD-specific glutamate
dehydrogenase"
/pfam="Bac_GDH ELFV_dehydrog"
/product="NAD-glutamate dehydrogenase"
/translation="MCIDHNVDTESLFLKADQENQQDKEKIKKFIKYFYFSFVYKSDLK
ANDKFLLYIVNDAYNFVSQKEKDESKLVVSNIDDIPGIEGDTTITKITNDMPFLVDS
VIATIKSHNLTICYYSNSIINIKRKDGLIDEIYSLEESNGVKESVIYVVIKGISDSFV
DTLKESLQKTLKAVNCVVKDWHMLMLKKLDEASLSVIPVLDTGIQEKDTWIPVSRTGMT
PDRNQEQKDFLVWLKNNNFVFLGYQEYIAGKDEKLVCDSSKKDLGLMRVQGQSTLIPSAN
LDSLYILRSDLISIVHRRTYMNCIGVKEFDDQGNVVKERRFFGLFTSVAEVQDIRTIP
IIRDKVKVIEKSAGFVTGGHNNKALIYILQVFSCDELFSNEKELFQICTSIMSLAIR
PRVKLCLRSKGAFSTCIVLIPMYASSRLMLKISNILKDEINAESSDIYNHHIINEYD
LMKLHVVLKAKNASIPDDEVLRLENKLRNITEKWEDRFIDNLYNTFSTVEDIFIRYCK
AFPISYQESFEPHDAYYDMKKLEIVRKKRVSEVDLRLTRDNLNYQLKVYTSSNGGLEL
SKILRITKNLGAKILSHNGYYIEINGGIWIHHFVLSRVDELIDNITLKEQFEITLAKV
FSKEIKNDYFNSLI I IAGLKWKEVLLVRALSAYLKQTSFNYNPEYIQKVSEHPKIVK
YLIQLFHARFDPNIDIDRAETTDIVREKIEELLKEISNVSHDYVLSIFNLIMATLRT
SYYQDDKPYLSTKFDSSKINGLPDRPYRELYIYSNLFEGIHRLGGKLARGGLRWSDR
TEDFRTEVLGLMKAQMTKNAVIVPVGAKGGFVIKQAYKDKNILREKSVECYKSFIRGM
LDITDNVVDGKIIPPKDVIRYDEDDPYLVVAADKGTASFSDYANQIASEYNFWLGDFAF
ASGGSAGYDHKKMGITARGAWIAAQRHFWKMNKDIYQDVTVIGIGDMAGDLFGNGMLL
SKNIHLIGAFNHMHIFVDPNPDAEKSFTERKRLFELPFSTWMDYNKDLISQGGGVFER
SSKQVNISQEIKKCFDITEDMLPPSDLIRYLLKAKVDFIWNNGGIGTFVKAKSENHSMV
GDKANDELRVNGKDIRASMFIEGGNLGCTQFGRIEYAEKGGYINADFVDNSAGVICSD
LEVNIKIAFVSAMKAGGISLEKRNEILASMVDEVASKVLENHNKIETKALLLECLQAK
ERLEQHHRLLLSLEKSGLLNRSVEFLPTEEEIARMLTGAEGFSSPQLSVLMSYARTAI
KNEIIHSDLSEKDLISHDYLLGYFPKMKMVTFKDFILKHQLRREIISTCIANDVVNRM
GCIFINNLAENTGIKIQEAVNIYIVVNHLVDLNSLWQKIDELDGKIDVNSYLQIVRNV
QKFIGRVSFVLVKNLGLKLSFVELDDVTKFDAIETLGQNLTDVLDEHLLKIYSHGSTS
LVELNINKDLAKKVADLCVLAYALDIISVAEQTSLSILDAGKIYFELKSLRFDLIRT
IAIKMKSRSYWDRLVNDLLDDLSNYHHKLAVKVIKATDNPEDKVQTWACDDKDYIE
RYNSFLDEMVASKLDSLKLIFIIRRIKVLAS"
/besthit="qcoverage 100 , hcoverage 100 , similarity 100
, identity 100 , evaluate 0.0 , alnlength 1583 , Bacteria ,
Proteobacteria , WP_174516771.1 NAD-glutamate
dehydrogenase [Wolbachia endosymbiont of Cardiocondyla
obscurior]"
```

gene

```
complement(29390..31951)
/locus_tag="wEsol_01330"
```

CDS

```
complement(29390..31951)
/locus_tag="wEsol_01330"
/codon_start=1
/transl_table=11
/fullproduct="qcoverage 100 , hcoverage 100 , similarity
100 , identity 100 , evaluate 0.0 , alnlength 853 ,
Bacteria , Proteobacteria , WP_015588884.1 MULTISPECIES:
ATP-dependent chaperone ClpB [unclassified Wolbachia]"
/cog="clpA COG0542 786 ATP-binding subunits of Clp
protease and DnaK/DnaJ chaperones"
/pfam="Clp_N Clp_N Pfam-B_2381 AAA_16 IstB_IS21
Pfam-B_6556 AAA_22 AAA AAA_5 Pfam-B_851 IncA Pfam-B_18840
```

AAA\_16 DNA\_pol3\_delta2 AAA\_2 Sigma54\_activat AAA\_22 AAA\_5  
 Pfam-B\_4367 AAA\_AAA\_17 Pfam-B\_17810 ClpB\_D2-small"  
 /tigr="TIGR03346 chaperone\_ClpB 853 ATP-dependent  
 chaperone protein ClpB"  
 /product="ATP-dependent  
 chaperone ClpB"  
 /translation="MDLNKFTEKAKSLIQSAQMKALGAGHQIFMPEHLLKVMLEDESG  
 LVQDLINACGGSVQSISDAVDSAIKKLPVIEGPGSGGLQLSREIAKVFEDSIGIARRN  
 KDSFVAVERLLQGLTAQKDDTVGKILAENGVTLQKLNSVIAEMRQGSSADSPNSEEKL  
 NAAKKYTKDVTELAMQKGKLDPVIGRDEEIRRTMQVSLRRTKNNPVLIGEPGVGKTAIV  
 EGLANRIVANDVPLGLHDAKVLALDLGALIAGTKFRGEFEERLKAVINEISRAEGKII  
 LFIDELHTLVGAGATSGAMDASNLLKPALARGEIRCIGATTLD EYRQHIEKDPALARR  
 FQPVFISQPTETDTISILRGLKERYEVHHGIRITDGAIIAAATLSNRYITDRFLPDKA  
 IDLIDEAASRVRIEMDSKPEVIDELERKVIQLKIEAEALKKESDENSEKQRLKKINEEI  
 ENLNSKFADLNSKWQMEKNKIARIQETA EKLDNARKELELVQRSNGLGRAGELMYGVI  
 PQLENELKNQEKVTD SFLKKEVTGDDIANIVSKWTGIPVDNMMHSEKEKLLNMENEIG  
 RRVIGQKDAIEAISNAVRRSRSGVQDTNRPFSGSFLFLGSTGVGKTELAKALAEFLFDD  
 QSALLRFD MSEYMEKHSVSKLIGAPPGYVGYEQGGRLTEAVRRRPYQVILFDEIEKAN  
 PDIFNLLLQILDEGRLTDSHGKLIDFRNTILILTSNLGAEIMLKGNVDSVRNEVMQIV  
 KSTFRPEFLNRLDEIIIFHSLTRDDIYKIIDVQFSYLQKTLAKRKLSISLSQEAKELI  
 AQTGYPDPEYGARPLKRVIQECIQNNLAKLVLSGEVVENDELIVYALDNEILVKKV"  
 /besthit="qcoverage 100 , hcoverage 100 , similarity 100  
 , identity 100 , evaluate 0.0 , alnlength 853 , Bacteria ,  
 Proteobacteria , WP\_015588884.1 MULTISPECIES:  
 ATP-dependent chaperone ClpB [unclassified Wolbachia]"  
 gene complement(32090..32431)  
 /locus\_tag="wEsol\_01331"  
 CDS complement(32090..32431)  
 /locus\_tag="wEsol\_01331"  
 /codon\_start=1  
 /transl\_table=11  
 /fullproduct="qcoverage 100 , hcoverage 100 , similarity  
 100 , identity 100 , evaluate 1.53e-79 , alnlength 113 ,  
 Bacteria , Proteobacteria , AAS13810.1 transposase, IS5  
 family, OrfB [Wolbachia endosymbiont of Drosophila  
 melanogaster]"  
 /cog="COG3293 COG3293 124 Transposase and inactivated  
 derivatives"  
 /pfam="DDE\_Tnp\_1\_2 DDE\_Tnp\_1"  
 /product="transposase, IS5 family, OrfB"  
 /translation="MRTKYTKVKMWADMGYQGRNLKNHIKEEYDIDIEIVKRPPCRF  
 WVHKDTPPELLPTREQGFKVQPRRWVVERTFAWVNRNRRLSKEYDLLTTSTENFIYLA  
 MSRVMLKREYA"  
 /besthit="qcoverage 100 , hcoverage 100 , similarity 100  
 , identity 100 , evaluate 1.53e-79 , alnlength 113 ,  
 Bacteria , Proteobacteria , AAS13810.1 transposase, IS5  
 family, OrfB [Wolbachia endosymbiont of Drosophila  
 melanogaster]"  
 gene complement(32542..32922)  
 /locus\_tag="wEsol\_01332"  
 CDS complement(32542..32922)  
 /locus\_tag="wEsol\_01332"  
 /codon\_start=1  
 /transl\_table=11  
 /fullproduct="qcoverage 100 , hcoverage 100 , similarity  
 100 , identity 100 , evaluate 1.16e-87 , alnlength 126 ,  
 Bacteria , Proteobacteria , AOV87106.1 transposase  
 [Wolbachia endosymbiont of Drosophila incompta]"  
 /cog="COG3293 COG3293 124 Transposase and inactivated  
 derivatives"

```

/pfam="DUF4096"
/product="transposase"
/translation="MRKKYPTDLSEREWARIEKHFRVSYKKGGRPPKYSKREILEAIF
YVLRTGCQWRYLPNDFPLWKTVYEQFRQWKKQGIFEKMNIEITKYSRRKIGRNEQPSA
CIVDSQSVKTTEKGGSKAMMEVKK"
/besthit="qcoverage 100 , hcoverage 100 , similarity 100
, identity 100 , evalue 1.16e-87 , alnlength 126 ,
Bacteria , Proteobacteria , AOV87106.1 transposase
[Wolbachia endosymbiont of Drosophila incompta]"
gene complement(33146..33493)
/locus_tag="wEsol_01333"
CDS complement(33146..33493)
/locus_tag="wEsol_01333"
/codon_start=1
/transl_table=11
/fullproduct="qcoverage 100 , hcoverage 100 , similarity
100 , identity 100 , evalue 2.74e-74 , alnlength 115 ,
Bacteria;Eukaryota , Proteobacteria;Arthropoda ,
WP_155968342.1 MULTISPECIES: IS630 transposase-related
protein [Wolbachia]"
/cog="COG3415 COG3415 138 Transposase and inactivated
derivatives"
/pfam="HTH_Tnp_IS630 HTH_Tnp_1 HTH_23 HTH_28 HTH_29 HTH_7
CENP-B_N Pfam-B_14738 HTH_8 HTH_17 HTH_24 Pfam-B_2106"
/product="IS630
transposase-related protein"
/translation="MAYSVDLRERAVSMIEKGSKVEVAELLEIGIATLYRWLRKKAA
GESLRPSKNGSFIRKIDPKILEEYVKNPDHTLAEMKQNLGFGINSIWYRLKQLRITL
KKSYSISRQSR"
/besthit="qcoverage 100 , hcoverage 100 , similarity 100
, identity 100 , evalue 2.74e-74 , alnlength 115 ,
Bacteria;Eukaryota , Proteobacteria;Arthropoda ,
WP_155968342.1 MULTISPECIES: IS630 transposase-related
protein [Wolbachia]"
gene complement(33483..33704)
/locus_tag="wEsol_01334"
CDS complement(33483..33704)
/locus_tag="wEsol_01334"
/codon_start=1
/transl_table=11
/product="hypothetical protein"
/translation="MSLTDIAHRINELASSWEQFKLINDRKLKEIESKGRADSATIEQ
LCKVNNAIDIVLPKVNDKGIISYLSYNGV"
/besthit="qcoverage 72.6027397260274 , hcoverage
48.6238532110092 , similarity 100 , identity 100 , evalue
2.10e-27 , alnlength 53 , Eukaryota , Arthropoda ,
GFR30620.1 phage major capsid protein [Trichonephila
clavata]"
gene complement(34248..35045)
/locus_tag="wEsol_01335"
CDS complement(34248..35045)
/locus_tag="wEsol_01335"
/codon_start=1
/transl_table=11
/fullproduct="qcoverage 100 , hcoverage 100 , similarity
100 , identity 100 , evalue 1.46e-190 , alnlength 265 ,
Bacteria , Proteobacteria , WP_155968486.1 MULTISPECIES:
hypothetical protein [Wolbachia]"
/translation="MSNINRIIREVIKEFRSKLPDKEIEEYSGKLNKLHIYQCNKHII
ENKKLYHYTINGKTHAMGQHGHNFKVKSLEVLNRNKPQISLEEVIDFMEKIINFGIDSC

```

```

YGAFEMIFESRSGVTIDDAVNFKVDSLSSKFYRFHSGIFKVILELNPESSELEEIEKQ
FSKVVDPFYFLNAWSRESERAFKICRLCREGHVENMQKFDFSNNFLDQDSAGALRALL
QYCVDVSNQKALGDSHELHREEMEGIYKFDDNYDLNLDSDHNDSIWH"
/product="hypothetical protein"
/besthit="qcoverage 100 , hcoverage 100 , similarity 100
, identity 100 , evalue 1.46e-190 , alnlength 265 ,
Bacteria , Proteobacteria , WP_155968486.1 MULTISPECIES:
hypothetical protein [Wolbachia]"
gene complement(35095..35769)
/locus_tag="wEsol_01336"
CDS complement(35095..35769)
/locus_tag="wEsol_01336"
/codon_start=1
/transl_table=11
/fullproduct="qcoverage 100 , hcoverage 100 , similarity
100 , identity 100 , evalue 4.48e-151 , alnlength 224 ,
Bacteria , Proteobacteria , WP_213863516.1
orotidine-5'-phosphate decarboxylase [Wolbachia
endosymbiont of Ceratitidis capitata]"
/cog="PyrF COG0284 240 Orotidine-5'-phosphate
decarboxylase"
/pfam="OMPdecase"
/tigr="TIGR01740 pyrF 216 orotidine 5'-phosphate
decarboxylase"
/product="orotidine-5'-phosphate
decarboxylase"
/translation="MNPIICALDTQDLNKAISLANALRGKVGVMVKLGLEFFAAQGLSG
VQEVAKCNVPIFLDLKLHDIPNTVAKTVEVIKVLNIEMLTLLHISGGTKMLEEALSVVQ
GTKIKLIGVTVLTSMNEDLNELGVAREAKSQVILLAKLAKKIGLHGIVCSALEAQEV
RREGEDFKIITPGIRIDPGHDDQKRTATPKEAINSGADYIVIGRPITKTTSSAELIL
KSMKEF"
/besthit="qcoverage 100 , hcoverage 100 , similarity 100
, identity 100 , evalue 4.48e-151 , alnlength 224 ,
Bacteria , Proteobacteria , WP_213863516.1
orotidine-5'-phosphate decarboxylase [Wolbachia
endosymbiont of Ceratitidis capitata]"
gene complement(35800..36693)
/locus_tag="wEsol_01337"
CDS complement(35800..36693)
/locus_tag="wEsol_01337"
/codon_start=1
/transl_table=11
/pfam="DUF3584 Pfam-B_1482 Flid_C"
/fullproduct="qcoverage 100 , hcoverage 100 , similarity
99.7 , identity 99.3 , evalue 2.37e-66 , alnlength 297 ,
Bacteria , Proteobacteria , WP_182309361.1 hypothetical
protein [Wolbachia pipientis]"
/translation="MDKTKEEIDKLVAREEEELHLKISCLREQLQEKEERITELKGKID
NNQCKELENKKLNEEVEKLRKEIRELYEKEDKFYKERDILRKKEIDIFYKERDILYEEE
KKLHTKLDLCKEIRKINKEKENLSKKLEKKFDELDEANGLIENQSFELDGIRKDCNN
EVKGLKNLLLERDSQIEQLEEDLLRNAEEKKGYPPEMLESVVDKVEKLVNNNEAIGDR
SRKIILQETQKIKFILKEIMQFTLGEDSRCEPSEETFDCLLEDLGASRSSTPIKLP
NSLLTESYERNQSESIKKTQQ"
/product="hypothetical protein"
/besthit="qcoverage 100 , hcoverage 100 , similarity 99.7
, identity 99.3 , evalue 2.37e-66 , alnlength 297 ,
Bacteria , Proteobacteria , WP_182309361.1 hypothetical
protein [Wolbachia pipientis]"
gene complement(36744..37157)
/locus_tag="wEsol_01338"

```

CDS complement(36744..37157)  
 /locus\_tag="wEsol\_01338"  
 /codon\_start=1  
 /transl\_table=11  
 /pfam="Pfam-B\_16753"  
 /fullproduct="qcoverage 98.5401459854015 , hcoverage 83.8509316770186 , similarity 85.9 , identity 83.0 , evaluate 1.41e-55 , alnlength 135 , Bacteria , Proteobacteria , WP\_209472953.1 hypothetical protein [Wolbachia endosymbiont of Wiebesia pumilae]"  
 /translation="MSNLLSEANAFYFVASSLATLTLTSLALIVISNVPLPLILALA  
 TLSILVLALS YKIIISNNKKIEVERNKFAQKEQELENKITLEKEAEAAANKEVKNLHE  
 LTREKQNL DKRAKRLDQKVNESEVERESLLEKNL"  
 /product="hypothetical protein"  
 /besthit="qcoverage 98.5401459854015 , hcoverage 83.8509316770186 , similarity 85.9 , identity 83.0 , evaluate 1.41e-55 , alnlength 135 , Bacteria , Proteobacteria , WP\_209472953.1 hypothetical protein [Wolbachia endosymbiont of Wiebesia pumilae]"

gene complement(37331..38449)  
 /locus\_tag="wEsol\_01339"

CDS complement(37331..38449)  
 /locus\_tag="wEsol\_01339"  
 /codon\_start=1  
 /transl\_table=11  
 /fullproduct="qcoverage 100 , hcoverage 100 , similarity 100 , identity 100 , evaluate 1.54e-128 , alnlength 372 , Bacteria , Proteobacteria , WP\_213863515.1 hypothetical protein [Wolbachia endosymbiont of Ceratitis capitata]"  
 /translation="MSNLLSEANAFYFVASSLATLTLTSLALIVTSNVPLPLILALA  
 TLSILVLALSCKIISNNVELEAKVKGQLEHKEEMLSLEHQELRDENTRLNERVDSLME  
 ELCQCKLESEKNKCLKSEYEDELRLRLEYEDELNLELEHKSREASSLRTQLTMLRKK  
 VEVEEVKQLKTLESEEQHESSES DIEELEKKLCQSEKEKKELEGKVSDERQKRTDLES  
 KVDKLCTKEKEYLSKIKELEKESLSLQKEEKEFDNTLT TVNDDRDNKVKELNSSLKQ  
 SSQIEQLQKALLEKKKEEVLFLQRMIEYVTDEVEKLVRENEVIRDDDKKVLQVIQAT  
 KSVLVEEAAQYLPGETSVPSFVEDPGYTSGCSTPINSH"  
 /product="hypothetical protein"  
 /besthit="qcoverage 100 , hcoverage 100 , similarity 100 , identity 100 , evaluate 1.54e-128 , alnlength 372 , Bacteria , Proteobacteria , WP\_213863515.1 hypothetical protein [Wolbachia endosymbiont of Ceratitis capitata]"

gene complement(38621..39031)  
 /locus\_tag="wEsol\_01340"

CDS complement(38621..39031)  
 /locus\_tag="wEsol\_01340"  
 /codon\_start=1  
 /transl\_table=11  
 /product="hypothetical protein"  
 /translation="MLGEGRLCNHIEIPTLTGTDTRKKIINEYCQKENLQSIHTILNN  
 TSEDFSPANLISLLKEIEGCASKVRDKTKTAAICRSFKRTHNIKKVSNKQTNRKIENS  
 IGESQQYTSRPSHKLNDALCDSGYTSICSTLINS"  
 /besthit="qcoverage 97.0588235294118 , hcoverage 60.2739726027397 , similarity 98.5 , identity 97.7 , evaluate 2.58e-82 , alnlength 132 , Bacteria , Proteobacteria , EAL59685.1 Cell division protein FtsH-like, partial [Wolbachia endosymbiont of Drosophila simulans]"

gene complement(38997..>40382)  
 /locus\_tag="wEsol\_01341"

CDS complement(38997..>40382)

```

/locus_tag="wEsol_01341"
/codon_start=1
/transl_table=11
/product="hypothetical protein"
/pfam="DUF677 FlxA DUF948 DUF2730 DUF677 RuvB_N
Sigma54_activat Pfam-B_736 AAA_19 DUF815 TIP49 AAA_14
AAA_22 AAA AAA_17"
/translation="PVALSLSILSTLILALSCKMISRNNKLAAQGAELNEKTELAEEQ
ENTIQSLEPQIKGLNKKVSDLETKLDEISRQANGAATKDEVEELKAKIASAATQEEIN
KLSNEVKELGTSAAATKEGLNKKVSDLETKLDEISRQANGAATKDEVEELKVKIASVAT
KEELNKLNNVKELGTSAAATKEELKAGLNGTATKDEVKQLRGEFANAATKDEVEQLRG
EFASAATKEELEAGLNGAAKDEVKKLIEDAVEKLKKELMAGLNGAAKDEVKKLIEDAV
EERLSSLIKEVEVKEELQMKFYEKGKKRYKTTFFDDVILPNGKKQKLKEIYESQKESDA
ALKKGEGYILHGLPGTGKTMIAKAIASETKDTSAFISVSGSSSLFNKININDLFKKAEE
NAPCIVFIDEIEGFGKAYSSDDNIRYLKHFLTKIDGSDHVGKVKVIAATNHIGILDKA
LVRGGSFMSQSH"
/besthit="qcoverage 103.904555314534 , hcoverage
72.7963525835866 , similarity 92.9 , identity 92.7 ,
evalue 2.26e-235 , alnlength 479 , Bacteria ,
Proteobacteria , WP_155968493.1 AAA family ATPase
[Wolbachia pipientis]"

```

# ORIGIN

```

1  ttgagtctgc  ttgcttttgt  ttacaatact  ttcatatgct  aaattattaa  gtcctaaaat
61  atttttatct  ctttgactta  aaatctcttt  ttctctgtaa  atacaattta  cataatcatc
121 gtacctctct  ttagtaaat  tatttaaagt  tgcaccctcc  gatattactt  gtaatatctt
181 tttctcctct  agaagtctag  aattctcagt  agaatcgacc  caatatagtt  cttgtgttgt
241 attaattata  cggctctaca  aggactcgcc  gtctttatat  ggaaaagtga  acataattcc
301 ttgttccagt  gcttggtcta  taacttcata  aagtctccct  ttcaacttcc  caatatcatc
361 ttcttcacat  tcaccagctt  catctgaatt  actaaggatt  ttatccattt  cttgccaaat
421 actttcatac  ttttcctttt  ctgcttttatt  cagttctatt  tgggctaaag  aaaaagaatc
481 tttttttatt  atgttttgtt  tttcatcatg  aaaactcaga  tgactgtagc  gtttaccaca
541 atctgtatca  taatgaccaa  catcattatc  accacagtcc  gaactatctt  ctgagttccc
601 atcactatct  gaccaattgt  caactttcgg  aaattctgag  cttttctggt  caccttcaaa
661 agtctgatta  ctaccgccag  cgccctttgt  caaattttct  ttactttcac  aagaatcacc
721 taaagaatag  ccttgaccct  cttcttgatc  tgaagcactt  aatttgctac  aagtcgcttg
781 actataatca  ttgaagtatt  aacctaaacc  attactacca  tgctgtaaag  gatcgctttt
841 aaaaatttgt  ggattattac  ttccgtctgg  caaattacct  gataaaccag  tctgatgatt
901 attttcacct  acccaaccat  cagttggtgt  tggaatgcat  attcctgtat  atctttggct
961 atcaagagaa  tcattagtta  attgtactgc  tgtataagtt  gtccggtcac  cctcatcatc
1021 ggaactaata  cctgaatcat  ggccatcacc  ttcttcaatc  ttttgagttt  ctatatcgtg
1081 ttcatttatt  tcgctcgacg  aatcatagtt  ggaagggtta  tactgttgat  taggacgttt
1141 aaaaatttga  cgccaatcgc  tgtaaggctc  cttaaaatcg  aaaggagtgc  gtataacttt
1201 ttccttgctt  gataccccac  cattcatatt  gtataaccat  tactcactaa  tcccttagtg
1261 aatatcgtaa  tatataggta  tgtcaataaa  aaaatataac  tttcttttgt  tctaactttt
1321 gcaaatcagt  atctatagct  cggtaatctt  tcatacgttg  cactctggac  ctaggagcgt
1381 tgtaataaaa  tccacgacag  ctagacaatc  cttgctcgtc  cactaaaagg  aaaagcagca
1441 aggagcgaac  caaaagcgat  aagaaaggat  ccaaaccaga  ttatagacat  tccaggttta
1501 tagtgcaatt  tagctgcaat  tttgctctta  ctcttatcaa  tttctccaat  tacaacataa
1561 atatcagaaa  ataaattgtg  gtagatactg  ctttcaacat  ttttctgacc  ttccacaagg
1621 taaaatctat  attcaggggt  tatctcacct  aatatcttat  tattcagcaa  attcctgata
1681 tccattgtac  cctcactgc  atggaaattt  ttttctttta  ttagctcaat  atttcgtaaa
1741 gtaactttta  acttattgac  tgttatgcta  tcccctattt  ttaagtaatt  ttcttttttc
1801 tcttgccaac  caaccgaata  tgctatacca  agcactagaa  ttgccactcc  agcatgagct
1861 gccatcattg  catagtagga  tttagaaact  ttttttgcta  ataaaattga  ttcgctctta
1921 aataaacgaa  ttcttttact  gtatgcttct  aaaacaaaga  ttaataatgc  tatggagata
1981 gtaattgata  gcacaattat  tagctccatg  tgaaagataa  acggcaaaat  agctgcagca
2041 ctgcagaatg  aaaatctata  ttgcggaat  attggcaata  gactatttcc  ctgccaactg
2101 cagtattgcc  caattatcgt  gagggctaga  atagccagtg  caataggatt  aaataaagaa
2161 ttgtaatatg  gtgctccaac  tgaaattaat  tcaccggtta  aatattcgag  cactgtaggg
2221 tataaagtgc  caacgaacac  aatgaaaaag  gcagtgatga  ataataaatt  gttcatcagc

```

|      |             |             |             |             |             |             |
|------|-------------|-------------|-------------|-------------|-------------|-------------|
| 2281 | atcatcgttaa | ggcgtgaaaa  | gagtcttctta | ccctctgtca  | cttgagtagc  | aagtttcttt  |
| 2341 | tcagattcca  | gtgtcacgca  | ctggaatgac  | attgcagatg  | tgtgattttt  | tctcgtaaac  |
| 2401 | actacaaata  | ttactaagct  | actgactgta  | aatacaccaa  | gtagcgctaa  | tatatacagt  |
| 2461 | ccataccttg  | ggtcatctgc  | aaacgtgtgc  | actgaggtga  | gtattcctga  | gcggtactaga |
| 2521 | aatgtttccag | tcacactcaa  | tataaaaagtt | gtaagcgtaa  | gtaaaatagc  | aaagttcttt  |
| 2581 | aaaacattga  | aattccgtac  | cacgagcaac  | aaatgtgtca  | gcgttactgc  | aattagccac  |
| 2641 | ggcatcaaag  | aaacgttttc  | cactggatcc  | caaaaccaa   | atccacccca  | cccaagttcg  |
| 2701 | cgatatgccc  | accagctacc  | caagctgatg  | cccaaagtga  | gcagcgacca  | agaaataagt  |
| 2761 | acccaaggcc  | tgacaatttt  | agcccaaaca  | tttccttcaa  | cttttgcaat  | taatccagct  |
| 2821 | atagagagcg  | aaaaaggaac  | gctaaaccca  | aggtacccca  | aatataatat  | cggtggatga  |
| 2881 | atagcaaggc  | ctatatcttg  | caatatcgga  | ttaaaaccca  | gtccatctgt  | ttcaatgcct  |
| 2941 | ggcatttttag | tgaaggggct  | ggattcaagt  | aaagtgaaca  | gtaaaaaaca  | aaagcaaadc  |
| 3001 | aagccttggg  | tgatcaagga  | tactttcttc  | aatttactgc  | cgttatcaat  | aaaaataccc  |
| 3061 | atcagaaaata | ggtaaaaggt  | aagcactaag  | gtccaaagca  | acatagatcc  | ttctttattd  |
| 3121 | ccccaaacac  | cacaaatctt  | gtagatcaaa  | ggttttgttg  | tgtgtgagtg  | gtagtatacg  |
| 3181 | ttttcgagtg  | agaaatcatt  | tgtaatgtgg  | cagtagatca  | aaatagccat  | tgatgttgat  |
| 3241 | acacaaaaaa  | atatggcagt  | ggtaataaac  | cgacaagaac  | taagcggtaa  | aaacaaatat  |
| 3301 | gtcaaagaca  | ataagcaggc  | tagcaatagc  | aatatattcc  | caagttcagg  | cataaaaaat  |
| 3361 | tatagttttt  | atataaacia  | tattactgat  | gacaagtaag  | aagttaaagt  | gttaattgac  |
| 3421 | acttgctatt  | gatgctatag  | ctaaagtggc  | ttagggtttac | ctacaatttg  | aaaaacaaca  |
| 3481 | aattcgtcat  | tccgctactc  | gttagcggaa  | tctataccgc  | gaatgaatcg  | cggtagtacg  |
| 3541 | tagggaaatc  | tttcttgggg  | cagctatagc  | ataatgctcc  | catagttagc  | tgtgctagta  |
| 3601 | ttagttaaaa  | attaaatat   | aaatctttat  | acttttatag  | atagcgttaa  | tattgaggtta |
| 3661 | acattgtggg  | tacaactaag  | attagtaaat  | ttccattcaa  | tataaaaagg  | aaagtggcaa  |
| 3721 | aacaacatgc  | cgaaccaata  | atcgaaaaaa  | atctctatac  | tatttttagga | ttcaaagata  |
| 3781 | tagaagattd  | tgaaaataag  | acaagtaagc  | ttgttaataa  | aaaagtttgg  | caatcatttg  |
| 3841 | ttgactgctt  | tgcaaaagaa  | atagattatg  | cagcaaccga  | aaaagttgta  | aaaagcatcg  |
| 3901 | tttgtaacat  | tgcaaaagag  | gatcgcgggtg | atgcttttac  | caaagctgaa  | cgtctaatat  |
| 3961 | taaatgaaaa  | acaaggtgat  | aaaaagagag  | aaaaagcgat  | tagagaagct  | attagtattt  |
| 4021 | tgagaaaaat  | caatccagaa  | aaagccttta  | atgaactttc  | agtaataaaa  | aaacaagctg  |
| 4081 | aagatttttt  | acaaaccgat  | ttttataaaag | ctcagagtaa  | accacttcaa  | ggatttgctc  |
| 4141 | catctggtgg  | acagctcttt  | gcggaagttc  | taaaatatat  | agaaacacta  | gaaaaatttag |
| 4201 | ctgaagtttaa | aaaggaagag  | ctagttaaag  | attdcttggt  | aaatcatggt  | agttcattga  |
| 4261 | ataaaaagta  | tcctaaatca  | caaggtaaaa  | gggaagatgc  | tataacaata  | ctatcaagtg  |
| 4321 | atgagttgaa  | gaattttttac | aataaaaggtg | taaaagaagg  | aatattacaa  | ccaatggtat  |
| 4381 | cttacaaaagg | atgcagaaaac | ctgtatgaca  | aaatgaacca  | gataaaaaat  | gaatccaaaa  |
| 4441 | gtataatttaa | aagagaagaa  | cgggaagaaa  | attdaaagaa  | aatagataag  | tcgataatca  |
| 4501 | gcgcaatttaa | tgacataaaa  | aaacatagag  | aagcaatcct  | taactgtaaa  | gactttcaaa  |
| 4561 | attctttacat | aaaagagaaa  | aaagaacatc  | cattttagagg | caacgcatgt  | caaaaaatga  |
| 4621 | ttgacatata  | tcaagagaga  | attgttggtat | atcaggagaa  | aattcgtcaa  | aacttaaacc  |
| 4681 | aaataaaaagc | gatattaaaa  | agtgcgccgc  | aagaaatgga  | tgatgtggaa  | gaattagagg  |
| 4741 | aaataatcga  | tggtatacat  | gaagcaaaaac | agttcgtatga | agatttttgat | tcagcttttaa |
| 4801 | tttgttttatc | gaacatgcag  | aatgagctag  | atattcaact  | ggaaaaatcct | ccaacagagc  |
| 4861 | taagagttttc | acacattaac  | gttaaaaactg | agctaaactag | gttataagggt | cggggttttt  |
| 4921 | gggataattd  | taattcaaga  | cagctcttag  | tctgtgtttt  | aatttggttg  | tgttttatta  |
| 4981 | aaaaaacttd  | agattttattg | cataatcgat  | actcaaatat  | aatgacacag  | acttgggaatt |
| 5041 | tgttacaaaac | agggcaaaaag | gaaggctata  | aaattgctga  | tactaatgct  | cgtattatcg  |
| 5101 | acccggaaac  | taaacttgat  | ataaaaaggtt | cgctattgac  | tgaaggggat  | aaaattgttg  |
| 5161 | attdttggcga | atcattattd  | tcaacaagtg  | gggtcgtatga | aacaatagac  | tgtaaagggc  |
| 5221 | ttgttctaatt | gccaggcctt  | attgacattc  | acgtacattt  | tcgtgaacca  | gggcaggaac  |
| 5281 | ataaagaaaac | tatatataca  | ggtagcaaat  | ctgcagctgc  | aggaggcggt  | acaactgtag  |
| 5341 | tttgtcagcc  | aaacactatt  | ccagcaattg  | atagcgttgt  | tttggctaaa  | tatttgaaat  |
| 5401 | atagagcact  | tgaaacttca  | catgtaaacg  | ttgaatttta  | cgctaaaatc  | accacttcgg  |
| 5461 | aagaaaagtt  | gactgaaatg  | gcacttttta  | aggaagcagg  | tgcggttggg  | ttcactgatg  |
| 5521 | atggcatgcc  | agttatgaac  | ccaatgatta  | tgagacaggg  | gctgctttat  | tcaagtatgc  |
| 5581 | tgggtgtttcc | tattgtctcaa | catgcagaag  | attdaaattd  | atcagcagggt | ggtgcaatca  |
| 5641 | acgaaggttaa | aattttctgaa | gaattgggag  | taaaggggat  | cttaagtgcg  | tcagaatcgg  |
| 5701 | ttatggtaag  | tcgcgatata  | ctgctcatga  | aagatatgga  | gaatgtgcac  | taccatattc  |
| 5761 | tacatgtctc  | ttcaaaaagat | tcacttgatg  | ctattaaacg  | tgcaaaaagat | ttgggatttaa |
| 5821 | atgtttacgtg | cgaagtaacc  | cctcatcact  | tcactttgac  | tgaagatata  | gtaaaaacaac |

|      |             |             |             |             |             |            |
|------|-------------|-------------|-------------|-------------|-------------|------------|
| 5881 | atggggcaat  | tgcaaaaatg  | aacccgccac  | ttcgactga   | agaagatcgt  | ttagctatgg |
| 5941 | ttgaagggtt  | aaagacaggt  | gtgattgatt  | gcattgcaac  | cgatcatgct  | ccgcatgac  |
| 6001 | gtagttctaa  | agatctgcc   | cttgaaaatg  | ctgcatttgg  | tattgttggc  | cttgaaacaa |
| 6061 | tgctgccct   | ttcacttgaa  | ctctatcaca  | gtgggcaaat  | gggtctactt  | gatgtgctcg |
| 6121 | caaaattgac  | atataagcct  | gcagatataa  | tacacatacc  | acgtggtcgt  | atacaaaaaa |
| 6181 | accttgctgc  | agacttaatt  | ttagttgacc  | tcaatcatga  | atgggaaatt  | aaaactgaca |
| 6241 | actttgctag  | taaatcaaag  | aattctcctt  | tcgatggtcg  | caaagtaaaa  | ggacacgtag |
| 6301 | tacgtactgt  | tgtgtccggc  | aaaactatat  | actcgcagaa  | gagttagtta  | tcatatctta |
| 6361 | tctattccaa  | tttgttatca  | ccagaatggg  | ctaagtgcac  | ctaaatttaa  | attaagaaat |
| 6421 | cttactactgt | ctccgaataa  | acacatcctc  | ttatctttcc  | ctaactctgta | aagttatttt |
| 6481 | gtctatcaat  | ctgattccaa  | aacagcaaaa  | ttattgtata  | atgttacttt  | gaagttttat |
| 6541 | tttcaatgca  | caagtttgca  | atactttttt  | ctatactgct  | tgcaatagtt  | gcttactatt |
| 6601 | taaacaacga  | agttatatatt | gaaatagcaa  | agctatttag  | tgacatatatt | gttagtttgt |
| 6661 | tgaaattaat  | aagttttacct | ttagtttttc  | tatctatagt  | ttccacaatt  | tcaggactca |
| 6721 | aagactcaat  | tgaaattaaa  | accttagtta  | agaaaacact  | atttttatacg | ctgcttacaa |
| 6781 | ctattatagc  | tgcgtttgtt  | gcattatcgt  | tttatttgtt  | aatagatcca  | gcaagaaaaa |
| 6841 | atttcataag  | taatacaata  | gggagtgtta  | acagcaataa  | ccacagttat  | ttttcatatt |
| 6901 | taaaatcact  | cattccttct  | aattttgtgc  | aagtctttct  | tgagaataac  | attattggta |
| 6961 | gtatattaat  | cgcttttttg  | atgggctggg  | ctattatttc  | actttcaaaa  | gaaaagcagg |
| 7021 | atatattaca  | tcaaataattc | tctgcacttt  | ttgatacact  | acttaaaatt  | gctcaagggg |
| 7081 | tattaaatt   | tattccgctt  | gctgtttggt  | cttttattac  | atgttttttg  | catgaattaa |
| 7141 | aaggtggtag  | cgagttctac  | aatcttttat  | ggatatttgt  | ttgcataatg  | tctgcaaatt |
| 7201 | ttgtgcaggc  | atctctgatc  | ttaccgctac  | ttatgtggta  | taaaggcata  | tcaccaattc |
| 7261 | aaacgctaag  | gggggttatg  | ccagcggtga  | cgctcgcatt  | tttctctaaa  | tcattccagt |
| 7321 | caacattgcc  | aacaactata  | gaatgtgtgc  | agaacaagct  | aaaggtgcc   | aagaaattgt |
| 7381 | cgtcttttat  | tttaccataa  | tgcacaacaa  | ttaatatgaa  | tgcatgtgct  | gcatttatac |
| 7441 | taatcactgt  | aatgtttgtt  | gcagaaatga  | acggatacgc  | attttccttg  | agcgaaatgt |
| 7501 | tgatatggat  | tttttttagct | acaggggctg  | caattggtaa  | cgctggagtg  | cctatggggg |
| 7561 | gctattttat  | ggcaaccagt  | tatctcgtat  | cgatgaatgt  | tcctttgcat  | attatggggc |
| 7621 | tgattttgccc | tattttatata | atcatcgata  | tgtttgaaac  | tgcaataaat  | gtgtggtctg |
| 7681 | atattttgcat | aactcagata  | attaataaag  | aatgtaatag  | tgaaacttaa  | aaaatgatat |
| 7741 | tagacgaaaa  | taacctataa  | ataaaagaat  | ttaaagaagc  | agaagcaatt  | ttgcatgggc |
| 7801 | attttgtttt  | atcatccgga  | ctgcatagtg  | gcacatacat  | acagtgtgcg  | aagatttttg |
| 7861 | aaaatccaag  | cagagccatg  | aaagtttgcg  | cattatttagc | agataaaaata | aaaaaagaat |
| 7921 | taaatagctc  | catagattta  | atattatctc  | ctgcaattgg  | tggaataaatt | gtgggttatg |
| 7981 | agattggcag  | gcagcttgga  | ataaagacaa  | tgttttgcca  | gcgcgttaat  | ggcaagtttg |
| 8041 | aattacgccg  | tggatttgaa  | attaaaaaag  | gtgaaaaaat  | attacttatt  | gaggatgtga |
| 8101 | taaccacagg  | taaatcttcg  | cttgaagcag  | tggaaatgtgc | agaaggggaa  | ggaggtaaag |
| 8161 | ttgttgctga  | agcttctttg  | ataaagagaa  | atagtgaaac  | gaaactgcct  | tttctgtca  |
| 8221 | tatctttgat  | tgaactgaac  | atcaaaaact  | acagcgagga  | agaacttcca  | agtgaattaa |
| 8281 | aacaactacc  | cataacaaaa  | cctgggagta  | gagaatatatt | aacaaagtaa  | tcctataata |
| 8341 | tcttggaagc  | acagcacagc  | tttagttatt  | tactctaagt  | gtatttttatg | tatacttatt |
| 8401 | actaaattaa  | ttttgaaatg  | atagaaaatg  | aacgaattta  | aatcgatccg  | aaatatagca |
| 8461 | ataatcgcac  | acgttgacca  | cgggaaaact  | actttactcg  | ataacatggt  | aaaacaaagt |
| 8521 | ggcacgtttc  | gtgagaatca  | agaagttcaa  | gagcgagtta  | tggaatagtg  | cgaccaagaa |
| 8581 | cgtgagcgcg  | gaattacaat  | acttgcaaaag | tgcacatcaa  | taatgtgggg  | cgatgaaaag |
| 8641 | atcaatatta  | ttgatacgcc  | agggcacgcg  | gactttgggtg | gggaagtggg  | aagggtattg |
| 8701 | tgcatggcag  | atggtgtgtt  | gctgctggtt  | gatgctgcag  | aaggtcccaa  | tgccacaaac |
| 8761 | aaaatttgtg  | ctctcaaaaag | cactaaaagc  | aaatttgaag  | ccaattgtga  | taatcaataa |
| 8821 | ggttgatcga  | ccagacagca  | gaattgatga  | agtactaaat  | gaaatatatg  | agttattttt |
| 8881 | taaccttgat  | gcaaccaacg  | agcagctaga  | ttttccagtg  | ttgtatgctt  | caggtagaaa |
| 8941 | tggttggtgt  | gctaaggagc  | tttctgatga  | aagaaaagat  | ttaagcccat  | tattttcaac |
| 9001 | ggttatagat  | tatatataaac | cttctgttta  | tgatcaaaat  | gcaccttttg  | ctatgttggg |
| 9061 | cactctactt  | gagtctgata  | agtttcttgg  | cagaatatgt  | acaggaaaag  | tttatcaggg |
| 9121 | tgttgacaaa  | gttaattcag  | atcttaaggt  | gcttgacctc  | gatggcaaa   | taattgaacg |
| 9181 | aggaagatta  | actaagttgc  | tctcattttc  | tggttgaaa   | cgcatccag   | tagaacaagc |
| 9241 | tgtggcgagg  | gacataattg  | caattgcagg  | acttgaggaa  | gcttcgggtt  | cagatactat |
| 9301 | agcagcacca  | gaagttacaa  | ctgcagtaag  | ctcaactcca  | gttgatccgc  | caacaatggc |
| 9361 | gattactctg  | agcgttaatg  | attcaccttt  | tgctgggcaa  | gaaggtacaa  | agcttacttc |
| 9421 | aactgctata  | aaggatcggt  | tatatgcgga  | agcagaaaac  | aatgttgcaa  | ttactgtgac |

|       |             |             |             |            |             |             |
|-------|-------------|-------------|-------------|------------|-------------|-------------|
| 9481  | tttggcacca  | agcgggtgaag | catttgaagt  | aggtgggct  | ggtgagttac  | agcttggagt  |
| 9541  | gttaattgaa  | aatatgagga  | gagaagggtt  | tgagctttcg | gtatcacgcc  | ctcgcgtgtt  |
| 9601  | atntaaagaa  | gaaggcggta  | aaaaacttga  | acctatagag | gaagtagtaa  | ttgatgtaga  |
| 9661  | tgatgaatat  | agtggaatca  | tcatggaaaa  | actcagcttc | cgtaaagggtg | aagtaactga  |
| 9721  | catgagacct  | tctggtaatg  | gcaggacaag  | attaacgttt | ttagtgccat  | caagaggatt  |
| 9781  | aatcggttat  | caaggagagt  | ttttaactga  | ttctcgtggc | acaggcataa  | ttaacctgtt  |
| 9841  | atctcacagt  | tatgctccac  | atagagggtc  | aatttctgga | aggcgcaatg  | gagttttaat  |
| 9901  | ttctacagat  | aagggtgagg  | ctgtggcata  | tgcaattttc | aatttgcaag  | acaggggaat  |
| 9961  | tatgttttatt | aagccacagg  | ataagggtata | ttgtggcatg | gttgctggcc  | agcatagccg  |
| 10021 | tgacaatgat  | ttggagataa  | atgtgttaaa  | gggtaagcaa | ttaacaaacg  | taagagcttc  |
| 10081 | aggtagtgat  | gaagctataa  | agctcactcc  | accaaagata | atgacactgg  | aggatatgat  |
| 10141 | agcgtatata  | gatgatgatg  | aattgggtgga | agtaactcca | aaatctatac  | gtttacgcaa  |
| 10201 | gaaattcctt  | gatccaaatg  | aacgtaagcg  | tgcaggaagg | gcaaagaata  | aggagtaatc  |
| 10261 | agaggttgaa  | catttgcgaa  | aaatagtgtg  | taattattcg | tctcctaatt  | gtattttaatt |
| 10321 | atggcctttt  | cgaaatttct  | cgatccaaaa  | aacaatttcg | cgttcaagag  | aataatttggc |
| 10381 | actgagaaaa  | ataaagatat  | tctcattcac  | tttctcaatg | atataattggg | cttcgctggc  |
| 10441 | aaagatgaaa  | tagaagaaat  | agaattttct  | agcactatca | tggatgctga  | gattgcctct  |
| 10501 | aaaaaaca    | gtattgttga  | tgttttctgt  | actgattctg | ctggaaccca  | gctaattatt  |
| 10561 | gaaatggtgc  | gacctgaaag  | tcttaggtca  | tattgtttaa | aaggagagga  | attccttcag  |
| 10621 | aaagaaacta  | aaagagttct  | aaaacttatt  | aaaccagatg | ttttgccatc  | tgagtctacg  |
| 10681 | catcagtgcg  | aatcgggtaa  | ccggttggtg  | ccaagcgatg | cggacaatga  | acctcctctt  |
| 10741 | gaaaaagaag  | atgctcaatc  | gtgaaaggag  | cataaactac | aagcatcatg  | tgggtggaga  |
| 10801 | gctaggctta  | gtggtatggt  | gaacgtaagt  | gaagcttcat | aagtatcgta  | acgattaaag  |
| 10861 | agctaaagat  | gctgataagc  | tccgaccaa   | aggtaatgtg | acatttttca  | tttctggatg  |
| 10921 | tacgcaaatc  | accggtatag  | agaagtcacc  | taaccactg  | ttgtatgaca  | gaagggaacag |
| 10981 | ggtaagcctg  | tatttccgcc  | tatatggcaa  | gcaaaccgca | aggaacgctg  | atgaaaatgc  |
| 11041 | aggtaaagga  | taatggagaa  | agcgaatgcc  | attttgtaac | gaaatgtata  | gaatttgtaa  |
| 11101 | cattaattcg  | cgtgaaaacg  | agcagatttc  | catttggtcc | ctcgtgacaa  | gaaactttgt  |
| 11161 | taaccacttg  | aggtagagaa  | gcagatgacc  | ttaccacag  | aaatgatgaa  | gaaattagga  |
| 11221 | atatttttta  | caaaaaggac  | aatactaaca  | aaagaacttt | attctattta  | gaatataaag  |
| 11281 | ttacaataaa  | ttttcctgtc  | atctccaaat  | aaattacatt | aacttagtat  | tgtatattgt  |
| 11341 | taataactta  | aataatacaa  | ccattttcag  | caacaaaaac | caaaggctct  | gagatacaag  |
| 11401 | atattttgtat | ggttactatg  | atatagtact  | tcccaaagta | aatgataaag  | gtataataag  |
| 11461 | ctattttgagt | tataatggcg  | tatagtgtgg  | atttaaggga | aagggcagta  | tcgatgatag  |
| 11521 | aaaaagggaa  | gtcaaagggt  | gaggtggcag  | agcttttgga | gataggaata  | gcaactctgt  |
| 11581 | accgctgggt  | aagaaagaaa  | gccgctgggt  | aaagcctaag | gccatcgaaa  | aacggcagct  |
| 11641 | ttattcgaaa  | aatagaccca  | aaaatactcg  | aagaatatgt | taaaaagaat  | ccagatcata  |
| 11701 | cgctggcaga  | gatgaaacaa  | aatcttggtg  | ttggaataaa | ttcaattttg  | tataggctga  |
| 11761 | aacagctaag  | aattacttta  | aaaaaaaagt  | acactatatc | aagagcgcaa  | tcaagaagat  |
| 11821 | aggcagcgat  | ttaccgataa  | aatctcaaaa  | atagaccatt | ccagcatctt  | atataatagat |
| 11881 | gaagcaggag  | ttgataatag  | gttataccga  | gagtatggac | gtgctccaat  | aggaaagaaa  |
| 11941 | atztatgcag  | atattccagg  | aagaaaacga  | gagagaatca | gtataatagg  | cgggtggatt  |
| 12001 | ggaaagagat  | ttattgcacc  | aatgactttc  | aaagggtggg | gtgacaaaaga | ggatttcaat  |
| 12061 | acatggttag  | agaagatggt  | attaccta    | ttgccacatg | gtactacaat  | agttatggac  |
| 12121 | aatgccacat  | tccataaaaac | tcccaaaaaca | aaggagttaa | tagataatgc  | tagatgccgt  |
| 12181 | ttgctctatc  | taccaacata  | ttcaccagat  | ttgaacccta | tagagcattg  | ttggaatacc  |
| 12241 | atcaaaagcc  | gcctcagacc  | tttaatgcat  | aaatatacag | acttacaact  | tttggttggg  |
| 12301 | aataaccataa | tggaaattta  | tcatttcatt  | tagaaaatac | tatattccaa  | agtttcaagg  |
| 12361 | ctatgagaga  | gtaagttatt  | ggctgccact  | cttcttcctg | agcctccatg  | ctgagctttt  |
| 12421 | ggtttgctaa  | ataattgttt  | gaatgatttt  | agtaacatta | cttttcctcg  | tctgaaattt  |
| 12481 | tggataattc  | agcttcta    | tcttctatcg  | tcggtaaagc | tgtttttatg  | ttctctggta  |
| 12541 | gattttcagt  | tattcgatat  | tctgctagcc  | ctattggctt | gttcatgtct  | cggagtgtat  |
| 12601 | atntagcaag  | tacatcgtct  | ttagattttac | ataagattaa | ccctatagaa  | ggttgatctg  |
| 12661 | tcgagtgcct  | cagtaaatca  | tcaactgcag  | aaagataaaa | attcattttt  | ccagcatatt  |
| 12721 | ccggcttaaa  | atccttatct  | tttagttcaa  | tactacgaa  | gcaacgtaac  | tttaaatgat  |
| 12781 | agaataataa  | atcaatataa  | aagtctttat  | taccaacatc | taaatgaaat  | tgtctaccaa  |
| 12841 | caaatgcaaa  | tccttcaccg  | agtttctaaca | gaaatttttc | catatgccct  | acgagtcctt  |
| 12901 | tttctacttc  | tctttcatga  | gcataccttac | ctatacttaa | aaaatcaaaa  | atatacggat  |
| 12961 | cttttaatgt  | gtaatgtgct  | agatcggatt  | gtggagatgg | taatttttct  | ttaaaattag  |
| 13021 | ttattgcttt  | tccttgacgt  | ttatgtagtc  | caagttctat | ctgcatcacc  | ataatgttac  |

|       |             |             |             |             |             |             |
|-------|-------------|-------------|-------------|-------------|-------------|-------------|
| 13081 | gtatgttcaa  | tagctttttt  | tacataaaat  | aatcttattt  | catgactttc  | tattttttcc  |
| 13141 | aaaagagtga  | tattgtgata  | ccaagttaat  | tgtgcaagag  | gctcctgcac  | aaattcaaca  |
| 13201 | tcaggatatt  | cttcggcaaa  | cttacgcata  | tacttcagat  | ttctcgtgct  | aaagcctttc  |
| 13261 | atctctggaa  | atgtacttct  | caaatcctta  | cttaattgat  | caattacctt  | agctccccag  |
| 13321 | ccgtgttctc  | tttgccgttt  | taagatttct  | gttccaatat  | aatggtagag  | caagataagc  |
| 13381 | ttactattta  | ctgcaagcgc  | tgccttataa  | cggcttggtg  | caatacgcac  | tttcaactgc  |
| 13441 | tctaaaaatt  | ctgtatatct  | ttttcctata  | atttttgtca  | tacggttcct  | tttaatccat  |
| 13501 | tatacaattc  | tttgtctgtc  | gagaaggcaa  | tctttcgctt  | gcctgcaact  | ttgaagggat  |
| 13561 | tccttattta  | cttcaaactt  | gtccatcaac  | taaaatatat  | tgacttttaca | tgcaatatta  |
| 13621 | gcttttaaacc | agtaaaacaa  | gctgcttaac  | atatgcgttt  | tttctattct  | aattacattc  |
| 13681 | ttttttttatc | ttcatgtggt  | tttctgcttt  | tttcggtacc  | ttcaacaaaa  | gcccaaacga  |
| 13741 | atgatacgct  | agttgtttct  | ataccacaaa  | ggaaaaaaga  | aacagttggg  | cacactgttg  |
| 13801 | tagcacaacc  | gaggcaaatt  | atcgaaatgc  | agaagaagt   | cattattaac  | gagggtaaag  |
| 13861 | aattttattcc | tgttccaaaa  | agaaaaaaa   | gtgtagagaa  | gaaactaaga  | agggatgtta  |
| 13921 | aagaggcaaa  | gaatgaaata  | ggaaacgaaa  | aaagcgttga  | gagcaaaaag  | gatgaattag  |
| 13981 | ttgtaacaga  | aattattaac  | tctataagag  | acaaacttac  | aaaatgctgg  | agcattcctg  |
| 14041 | aaagcatagc  | ttacaaagaa  | aatttttagta | taaaaatcaa  | cttattatta  | tccagtcaag  |
| 14101 | gtgagataat  | tatggccgat  | atagcagaca  | gtagtctcta  | tcgagataat  | ccacttttca  |
| 14161 | ggtcgatagc  | agataacgca  | atgcgtgcag  | tatataaatg  | tagccatta   | accggcttgc  |
| 14221 | ctattcagca  | ccaccacatt  | tggcgtgaag  | taacactaga  | ctttattcta  | tagctaaagt  |
| 14281 | aattgcagct  | gcatgaatgt  | tgtgaacgct  | acatttcaca  | cgaaaatgta  | attcaatgat  |
| 14341 | ggaattgcgt  | acaaaataga  | ttccagatac  | aagtgtcatg  | ctacttgggt  | aacatccttc  |
| 14401 | ctagtggact  | aaaatcacaa  | tattcgtaca  | gttatggaat  | gaaccgcggt  | atgacgtagg  |
| 14461 | aagatctgag  | caaactttca  | atcagaaaca  | gccaaagatc  | tctctaagat  | gtcagtttct  |
| 14521 | tttgtatctt  | caactttacc  | gtcctggctg  | aatgaaattt  | gcagagactt  | actactatac  |
| 14581 | ttcctttttc  | ctaaaaaatt  | ggcttggtta  | attttatatg  | agacatagta  | ccaaacattg  |
| 14641 | tcatcgaact  | ttgatactaa  | tgttggtgat  | cctaaagtgt  | gaaccacttt  | ttctttatcg  |
| 14701 | tcacctactt  | ttatcttgct  | ccacaattca  | acactaatgc  | caggagctcc  | gtgattgtga  |
| 14761 | atagtgtgag  | tgcagctcac  | tgtaaataat  | aaaataaaaag | atattaatac  | tcgcatttct  |
| 14821 | gttgataaat  | tacttgaagc  | tataatacac  | taataaatta  | tctgccgtca  | aatttcaaaa  |
| 14881 | aagttaaatt  | gactgattct  | caatatcact  | taatataata  | tttacttttag | aaaataatag  |
| 14941 | gtgtcttatg  | tcattgttag  | aagcagatcc  | aatatacaaa  | cctttttaatt | acccttgggc  |
| 15001 | gtatgatgcg  | tggctgcagc  | aacaaagaat  | ccattggata  | cctgaagaag  | ttccgctcgc  |
| 15061 | tgatgacgtg  | aaggattgga  | aaactaaact  | ttcaagtgtg  | gaaaaaaatc  | tactaaccce  |
| 15121 | gatcttttaga | ttttttactc  | aggcagacat  | tgaagttaat  | aactgctaca  | tgaggcatta  |
| 15181 | ttcaaataata | tttaagccaa  | cagaaatatg  | catgatgctt  | gcaagctttt  | ccaatatgga  |
| 15241 | aaccatacac  | attgcagctt  | attcttatct  | tttagacaca  | attggcatgc  | cagaaaagtga |
| 15301 | gtatcaagca  | ttttttaaagt | atgatgctat  | gagaaagaaa  | tatgaatata  | tgttggaatt  |
| 15361 | cgaggaaagc  | aaaaaacacg  | ataaaaaaca  | tgtagctaaa  | actctagcag  | tgtttggtgc  |
| 15421 | attcactgaa  | gggttgcatg  | tatttgcac   | atgtgcaatt  | ttgctcaatt  | tccaacgttt  |
| 15481 | tggaaaaatg  | aaaggaatgg  | ggcagataat  | cgcctggtca  | gcccgtgatg  | aaactttgca  |
| 15541 | caccaattca  | attatcatgt  | tatttaatac  | atgtcgcacc  | gagaataatg  | aaatttggga  |
| 15601 | caacgagttt  | aaagaggaat  | tatattctgc  | atgtcgcacc  | atcgttgaac  | ttgaggacga  |
| 15661 | attcataaag  | cttgcctttg  | atttaggaga  | tgttgaagga  | ctatccgcag  | aagaagtgcg  |
| 15721 | caattacata  | cgctacgtag  | caaacagacg  | gttaatgcaa  | ttaggtcttg  | agtccatata  |
| 15781 | tgatgtcaat  | gataatccta  | ttccgtggct  | tgatgaaata  | ctaaatggcg  | tggaacatac  |
| 15841 | gaatttcttt  | gaaaatagag  | taacagagta  | tagccgtgca  | gcaactcaag  | gcacatggga  |
| 15901 | ggaggctttt  | actgaaaacg  | acacgaataa  | taagtgaagt  | ctaatttcac  | tcttctttgt  |
| 15961 | cattccagtg  | tcagctactt  | tcattacacc  | atgtgctgtg  | cagtttaggc  | agttttgctt  |
| 16021 | tacttaacaa  | ctaacttacc  | atatatatgt  | ccatagaaca  | ttggtatata  | agaacgtgct  |
| 16081 | acaactacta  | atcttactca  | cggtcacac   | ttcagctgca  | ttctttggct  | atttagttcc  |
| 16141 | aatggaaata  | aaaaccttct  | tgtactcagt  | gagccttagt  | ataaaaagag  | ttttgctatt  |
| 16201 | tataatgcct  | tttggtattt  | ttgcgttaat  | ctttagcagt  | gttaacaatc  | ttaagcagtc  |
| 16261 | agctataaag  | tttatattat  | tacttattat  | aatgatcttc  | ttatcgaatc  | tggcttcaag  |
| 16321 | tttaatatgct | tattctgttg  | ggcattttat  | catacaaaac  | acttattcaa  | tacaagatat  |
| 16381 | aacgtatgaa  | gaaacaattg  | ttccttttat  | gtcgttttag  | ctgccgctac  | tcctttctaa  |
| 16441 | tttttatgcc  | cttgcttggtg | gatttgtatc  | cagcatagta  | gtgtccacat  | tgctacccaa  |
| 16501 | gaaaagcaaa  | gagcttttca  | acaaaatgtt  | agattttaact | ctcttttatt  | tgaaaacgtt  |
| 16561 | tttgacgccg  | attattccaa  | tatttgtact  | tgggcttgct  | ttaaaaatgc  | agcatgatca  |
| 16621 | agtttttatct | ataatatatta | aggattactc  | aataattttc  | attattatag  | catctgcaac  |

|       |             |             |             |             |             |             |
|-------|-------------|-------------|-------------|-------------|-------------|-------------|
| 16681 | ctaccttttat | gttttcctct  | tatatggagc  | agcaaattca  | ttcaaggtta  | caagctggat  |
| 16741 | agctagtata  | ggcaatatga  | taccggcatt  | tattactgca  | atgagcacia  | tgtctagtaa  |
| 16801 | tgcaactatg  | ccgcttactc  | ttgaagggaag | caaaaaaaat  | gtaaagcaac  | ctgacatagc  |
| 16861 | atcgtctgtt  | gtaccaataa  | ctgctagctt  | tcatttagta  | ggtgattgct  | tttttattat  |
| 16921 | aatattatca  | atgataattg  | cctccgggta  | ttcattattc  | acaatagatt  | atgtaacttt  |
| 16981 | tcttctctat  | tttttgttat  | ttaagtttgc  | tatcgtggca  | gtgccggcag  | gaggaattat  |
| 17041 | ggtaatgcta  | cctattcctg  | agaaacatct  | caaattctct  | ccagaaatgc  | tttcgttaat  |
| 17101 | tacagcattg  | tatatagtgt  | ttgatccaat  | aatcacttca  | gcaaagtgtt  | tgggtaatgg  |
| 17161 | tgcctttact  | atgatgtttg  | caaaactcta  | tgataagctt  | aagtaatgtc  | tatttttagcg |
| 17221 | attgatactg  | taggtattgg  | tagttcaata  | gcaatagttg  | attatgatgg  | taattgtttt  |
| 17281 | gtagagcgca  | attccgccag  | caatagtcac  | gcagaatcat  | tttttaaaac  | tttaaaact   |
| 17341 | ttattttaata | agcacaaatta | taactacgat  | aaaatagacc  | atttagcggg  | agtagttgga  |
| 17401 | ccaggaagtt  | tcactggaat  | tagagttggg  | atatcagcag  | cacaagggtat | aaatcttgct  |
| 17461 | acaaataagc  | cgttatatgg  | agttagtgcg  | ctggaagttc  | aagcctatgc  | aatatctttg  |
| 17521 | ctttgtaaaa  | atagcaaaaa  | aaatatcaga  | gctataatca  | aaaatgctca  | aggggtttat  |
| 17581 | acgcagttat  | ttgatttcaa  | tttattgccc  | ctgtctggtc  | caactgcagc  | atgtgaccct  |
| 17641 | ggtcacgcta  | caagcagtac  | acatatggat  | tgcaatttaa  | atgctagcca  | tgcaggacta  |
| 17701 | ttagttcatt  | atagactgaa  | gaacaagcaa  | aaattaaacg  | aagttgaagc  | tttatattta  |
| 17761 | aatgagcctc  | agtatatgaa  | attgctatag  | attattcttt  | tgcatacacg  | caatttggtc  |
| 17821 | aagcttgtgc  | atctgggtta  | ctatctcttg  | agctacttct  | tttatactca  | tatttgaatt  |
| 17881 | ttctatctct  | atggcactcg  | gtgggtataaa | tgaatcggtt  | gtcctcaatt  | tctctataac  |
| 17941 | gttattttaca | ttaatcacc   | tcctattttt  | tctttgcctt  | tttaatgcaa  | tacgcttttg  |
| 18001 | taatgtcagt  | agatcgccac  | tgagtactac  | aggaaggatt  | tctgtgcccc  | tttttttact  |
| 18061 | aagccttact  | attgaatcat  | acatcctcat  | gttctgggtca | ttattttcca  | tcaactcatc  |
| 18121 | aataaatatg  | taattttttg  | agtgaatcgg  | ataattttct  | attacctgaa  | gcataaattg  |
| 18181 | cataatgcca  | tatattctat  | cttgaacttc  | tttaggtatt  | ggatcacggt  | caaagacacc  |
| 18241 | atcgtatata  | gagcaagcct  | gaacattggt  | atagaacttg  | ctattttaca  | ttaatgcgtc  |
| 18301 | tatcatatta  | gataattcta  | ttgctgtgga  | aagtttacca  | cttcccgaaa  | gaccagagag  |
| 18361 | atgtatgaaa  | aatcctgctg  | gctgtttttt  | tgtgttaata  | tttaccatat  | tattttcaat  |
| 18421 | cttgaaactt  | acattttata  | taacataaaa  | atgaagcttt  | aaaacatatg  | aaatattata  |
| 18481 | tagaaaatta  | tttttgtagt  | taagatattg  | tgtaatttaa  | aaacataaat  | tctgtatata  |
| 18541 | aactctataa  | taacgataac  | tattttttaag | caagctacaa  | cacaaaagtg  | tttggtattc  |
| 18601 | agaaagcaag  | acagagtggc  | atagacttat  | tagtttacta  | caagtctctt  | ttcgcgtata  |
| 18661 | aaccttcaga  | agattctaac  | agaggattgt  | gttggttaaca | aagagcagag  | taaaaaggga  |
| 18721 | tctagtctat  | gcctatcaga  | ttttgtccta  | ccttaagttc  | gatgatcata  | catatactca  |
| 18781 | cctttcagtg  | cgttctgaag  | atcaaaaagtc | gtttttatatt | tatccgtttg  | gtatgcgttt  |
| 18841 | tgatgaagta  | gatgaacatt  | cgttaatgaa  | agtatcattt  | gatggagatg  | tagttgaagg  |
| 18901 | caaagaatat  | caatataata  | gaactggcta  | tataattcat  | ggttttggtt  | atcaagcaag  |
| 18961 | gaaagatatt  | caagcaattt  | ttcacttgca  | tacaccttct  | attgtagcgg  | tttcttctct  |
| 19021 | caaagatggg  | ctgcttccta  | taagtcaatg  | ggcactgcac  | ttttacaata  | aaatctctta  |
| 19081 | ccataattat  | aattccctag  | cacttagcga  | tacagaagga  | aagagggttaa | tagctgatct  |
| 19141 | gaaagaaaat  | tttgtcatgt  | taatgcgtaa  | tcatggatct  | ataacgtgtg  | gtcggagtat  |
| 19201 | acaagaagca  | atgtttttaca | cgtatcattt  | agaacaagcg  | tgcaaaaactc | aatgtttaac  |
| 19261 | gttagcaatg  | aataaggagt  | tatcaattcc  | aagtgaagaa  | atttgctcaa  | aagctgtaaa  |
| 19321 | ggatctccta  | tcttttgaaa  | gcaatcttgg  | tgagagggat  | tggcacgcac  | gggttagact  |
| 19381 | aattaaaagt  | aagttgtaag  | tgaccttacc  | cagaaaaaagt | agagagaaaag | ttaagacgtt  |
| 19441 | tttgaggtaa  | aataaaaacgt | tttttcaaaa  | tatgacaaat  | agaagagaaat | atacagcaga  |
| 19501 | attcaaatta  | gaagctgtta  | agctgggttaa | agaaacaggt  | caagcaagta  | caaaaatagc  |
| 19561 | aaaagatcta  | ggtatagatg  | gcagtatggt  | aagtaagaaa  | atatgatgga  | aaaatgtctg  |
| 19621 | gagcatacgc  | atttccaggc  | aaaggctcct  | tatgacaaag  | aaagattttga | tctaaaaaaa  |
| 19681 | gaactaacia  | gagaaagaga  | catcttagag  | gttgtccgga  | aactagtaaa  | ttcaagcata  |
| 19741 | ttccctcttt  | aacataaccc  | tactcatagc  | taggtatatg  | aaattctcag  | tggatgttgt  |
| 19801 | gagtaaataca | tactccttcg  | atagccttct  | attcctatta  | acccaagcaa  | aagtcctttc  |
| 19861 | tacaacccat  | cttcttggtc  | gtacttttaa  | cccttggtct  | cttggttggt  | gtagctcagg  |
| 19921 | tggcgtatct  | ttgtgcaccc  | aaaatctaca  | tggaggcctt  | ttaaacaattt | caatatctat  |
| 19981 | gtcatattct  | tcctttatgt  | gattcttttaa | atttcttctt  | tggatatccca | tgtcagccca  |
| 20041 | catttttttta | acttttagtat | attttgttct  | catattgttt  | aatgctattt  | taataccatc  |
| 20101 | tctatcattt  | tcgttagcag  | cgcctacgta  | acaacctagt  | ataaaaacct  | gagtgctctg  |
| 20161 | aatttatatgc | ctttttctac  | cctttacttt  | tttacttcca  | tcatagcctt  | tgatcccccc  |
| 20221 | ttttctgtag  | tctttacaga  | ttgactatct  | actatacagg  | cactcggctg  | ctcattcctt  |

|       |             |             |             |             |             |             |
|-------|-------------|-------------|-------------|-------------|-------------|-------------|
| 20281 | cctatttttct | ttctactata  | ttttgtaatt  | tcataattca  | ttttctcaaa  | aattccctgc  |
| 20341 | ttcttccatt  | gcctgaactg  | ctcatacaca  | gtcttccata  | gcggaaaatc  | atlttgtaaa  |
| 20401 | taccgccatt  | gacaccctgt  | acgcaatata  | tagaaaattg  | cttctaatat  | ttctcttttg  |
| 20461 | ctatactttg  | gcggccttcc  | tcctttcttg  | tatgatactc  | tgaagtgttt  | ttctattcct  |
| 20521 | gccatttccc  | tttcgcttag  | atctgtttgga | tacttttttc  | tcactctttac | cccgtactaa  |
| 20581 | aatttcagat  | attatagcct  | tttacttatt  | tcgggacaac  | ctctaactcc  | tttgttttgg  |
| 20641 | gagttttatg  | gaatgtggca  | ttgtccataa  | ctattgtagt  | accatgtggc  | aatttaggta  |
| 20701 | ataacatctt  | ctctaaccat  | gtattgaata  | cctctttgtc  | acacccacct  | ttgaaagtca  |
| 20761 | ttgggtgcaat | aaatctcttt  | ccaatccacc  | cgcctattat  | actgattctc  | tctcgttttc  |
| 20821 | ttcctggaat  | atctgcataa  | attttctttc  | ctattggagc  | acgtccatac  | tctcgggtata |
| 20881 | acctattatc  | aactcctgct  | tcactctatat | ataagatgct  | ggaatgggtct | atttttgaga  |
| 20941 | ttttatcggt  | aaatcgctgc  | ctatcttctt  | gattgctgtc  | ttgatatagt  | gtaacttttt  |
| 21001 | tttaaagtaa  | ttcttagctg  | tttcagccta  | taccaaattg  | aattttattcc | aaatccaaga  |
| 21061 | ttttgtttca  | tctctgccag  | cgtatgatct  | ggattctttt  | taacatatct  | ttcgagtatt  |
| 21121 | tttgggtcta  | tttttcgaat  | aaagctgccg  | tttttcgatg  | gccttaggct  | ttcaccagcg  |
| 21181 | gctttctttc  | ttaaccagcg  | gtacagagtt  | gctattccta  | tctccaaaag  | ctctgccacc  |
| 21241 | tcaacctttg  | acttcccttt  | ttctatcatc  | gatactgccc  | tttcccttaa  | atccacacta  |
| 21301 | tacgccatta  | taactcaaata | agcttattat  | acctttatca  | tttacttttg  | gaagtactat  |
| 21361 | agtaacggag  | taagtgattt  | ttatggatta  | caagctctag  | gtgtactatc  | ctatatatca  |
| 21421 | tacggtcaat  | acactctaaa  | tgagatggaa  | agatgaaggc  | atcattatag  | ctgctaaaaa  |
| 21481 | atacggcgat  | aaaaacttaa  | ttctttctct  | gtttacaaaa  | aatcatggaa  | agcgcagggg  |
| 21541 | attaactaag  | ctaacaacaa  | atagcaatta  | taagtttcag  | ataagtaatc  | tattacatgc  |
| 21601 | agaaaggagt  | gctaagttac  | ccgaaaatct  | aggttttttt  | aagtgcgaat  | taatcgaatc  |
| 21661 | tccattccat  | catttctttc  | aagatagggt  | aaaaagcatt  | actattgttt  | ctttctcctc  |
| 21721 | tatttttagaa | aaagtgcctc  | cagaaagtga  | accctgtgcc  | gtgctgtatg  | acaattttcg  |
| 21781 | atatttcatc  | gatgtaatta  | aacacaacaa  | tcagtcttgg  | caaagccatt  | atcttaactt  |
| 21841 | agagcttctg  | cttcttacgc  | aattgggatt  | caagttagac  | ttatccaaat  | gcgctgtaac  |
| 21901 | agggtgttaag | gaaaattttac | aattttatttc | tccaaaaact  | ggtagagcag  | tgtcaaaaaa  |
| 21961 | agtaggagat  | tattatgcag  | ataaactcct  | accttttcca  | caaatgttgc  | atgatgtata  |
| 22021 | caataatacc  | ctacaaaaca  | gctactcatt  | ccaagaattt  | cagttaggac  | tgaaagtcac  |
| 22081 | aggatatttt  | ttaaataagt  | atctattttt  | gcagttaaac  | gtgaaatttc  | cagagctgag  |
| 22141 | aaacctcatg  | ttgtcgcctt  | aatcttagca  | gtcctacgtc  | ataccgcgat  | tcattcgcgg  |
| 22201 | tatctcttag  | catagatcca  | gctaacaagt  | agcgggatga  | cgaacttatc  | gtcatgccac  |
| 22261 | cgcgaaaccg  | cataccgtga  | tttattcacg  | gtatctctta  | gcatagatcc  | agctaacaag  |
| 22321 | cagcgggacg  | acggttgtca  | gggtgtcatc  | ccagcgcgcc  | tatgatgtca  | tcccagtgcc  |
| 22381 | cagacactgg  | gatggctttg  | ttgcatcgct  | acttatgaaa  | ggctaactat  | agttaggatt  |
| 22441 | ataagcaacc  | tattgaaaat  | cttggttttt  | tgcaatcaat  | ctgatcaaat  | ttaagaatag  |
| 22501 | taattttatta | tttatattaa  | taaattttaat | tctattgaaa  | atagctaaag  | cattgaaatt  |
| 22561 | cttgaatttt  | agccgggatta | gtgagtggtg  | gtgaaatttc  | ttttactcaa  | atlttaggtat |
| 22621 | tcactgaccg  | ttcttggttat | aaataaccaga | ataataagct  | actgatattc  | tctacctttt  |
| 22681 | ttatctttat  | ccatcatagc  | tagcgatgca  | acaaagccca  | ctgggatcca  | gaaaaatttg  |
| 22741 | cttgtgaaca  | agcaaaactag | catggaaagt  | ggttacaacg  | ttttcgatga  | gattatatgg  |
| 22801 | aaaactggat  | tccagtggtca | agcactggaa  | tgacaaggta  | taaacccttat | cgatcatgctg |
| 22861 | ccgcgaaccg  | tcataccacg  | attcattcgc  | ggtatctcag  | catagattcc  | gctaattagt  |
| 22921 | agcgggaatga | cgggttgtcg  | caaacttaag  | ccacttttagc | tatagccagt  | aaccactcta  |
| 22981 | tttctaccac  | tgttttttgc  | tttatataaa  | tatttgtcgg  | cacgtactat  | aaattcttta  |
| 23041 | atattgtcaa  | ggtcagattc  | ttgcatttct  | gcaattccaa  | tgctcacagt  | tacatcgtgg  |
| 23101 | gttgtatttt  | tatccgcaag  | tataaaaagg  | tttttagcaa  | taatttttgcg | tattctttcc  |
| 23161 | gcaatagtat  | acgcatctga  | tgtatcggta  | tctggcatta  | caacaacaaa  | ttcctcacca  |
| 23221 | ccaaatctag  | ctaacaatac  | tgtcactcta  | atattttcag  | aaattcttct  | ctgtatttgc  |
| 23281 | tttaaaagtt  | catctccagc  | actatgccc   | aaactgtcat  | tcaccatctt  | aaaatagtct  |
| 23341 | atatcaagta  | tcataagaga  | caaccttcta  | tccttttcca  | cagagtcctt  | aacaatgttt  |
| 23401 | cttaagtgtg  | catcaaaaata | tcttctatta  | taacagttag  | ttaatgggtc  | ctttatagac  |
| 23461 | atltccgcatt | tattaaataa  | attcattctc  | aaggcatctt  | gatattcttt  | gcgtttcact  |
| 23521 | tgcgaaattaa | cccttgctat  | taactcacc   | tcattccaaag | gtactgttaa  | ataatcatta  |
| 23581 | gcacctacat  | caagtgtctt  | tactaaattg  | tttttatcat  | aatcctcaga  | aagaatcaga  |
| 23641 | attgggtgtat | aacgtgtttc  | caccttacta  | cgaaactcag  | aacacaaaacg | caagccgtca  |
| 23701 | gtttttgaaa  | attgcatatc  | agaaatgatc  | aggtcgtaac  | cattctcaat  | accaaccttc  |
| 23761 | aatgcttcta  | ttggatcact  | cagtatttta  | attgacctaa  | agcgttgctt  | taatatatta  |
| 23821 | tatatctgct  | ctgcttgatg  | aacatcctca  | tctataacaa  | gtatgttagc  | atcaaaaatc  |

|       |            |             |             |             |             |             |
|-------|------------|-------------|-------------|-------------|-------------|-------------|
| 23881 | tgattggaat | aatccataat  | actgtttcct  | gcaactccac  | caatctcagc  | gttagtttct  |
| 23941 | cctctcaaac | gcaattcatc  | gataatcatc  | tttaagcgtg  | tgagagactt  | aattcgtgca  |
| 24001 | gataaagcag | ttttgtttat  | tggttttagtc | agaaaatcat  | ccgcgccagc  | attaatacct  |
| 24061 | tgactcttat | catgagtatc  | atgcagcgca  | gttaccataa  | ttattggaat  | atgggttgtc  |
| 24121 | aagggatcac | tcttttagctc | cttaciaaact | tcaaagccat  | tcatcttttg  | catcatgata  |
| 24181 | tcaagtaata | taatatcagg  | ctgctgcttt  | gctactaaat  | ctatagcttc  | ttcaccatca  |
| 24241 | tgagctacga | taaccgtata  | gtactctgct  | tttagtcgag  | cttctaaaag  | cttgacatta  |
| 24301 | gatagtacat | catctactac  | cagaatcttc  | gctgtcatta  | tcttttagatg | tattatctat  |
| 24361 | atcgtaagta | ggataaagct  | taccattttt  | accaactatg  | taatttactt  | tctcagtatt  |
| 24421 | acactcttta | tataagtctt  | caattccggc  | atccttcaat  | aaccttctgg  | cttttaacct  |
| 24481 | tacaattgta | aaatacctat  | atatagtctt  | aataaaatca  | ataaatacag  | gtaccttatt  |
| 24541 | tttatcaaga | acaattatgc  | tcactaaagc  | tacaactaaa  | atctctgaaa  | gacctatatt  |
| 24601 | gaacattttc | ctatgaagca  | agtactttta  | tccttctgat  | tataaatatt  | aatttgctta  |
| 24661 | aatcaagttt | agaagcaacc  | atctcatcta  | aaaaactatt  | ataacgttct  | atgtagtctt  |
| 24721 | tatcatcaca | agcccagggt  | tgaaccttat  | cttcgggggt  | atcagtagct  | tttatgactt  |
| 24781 | taacagctag | cttgtgatgg  | taattgctta  | aatcgtccaa  | taaatcatta  | actaagctgc  |
| 24841 | gatcccaata | agaagagcgg  | cttttcatct  | tgatggcaat  | tgttctaata  | agatcgaatc  |
| 24901 | ttaacagcga | ctttaactca  | aagtatat    | taccagcatc  | agaatggac   | aaagatgtct  |
| 24961 | gttcagcaac | agatataatg  | tccagtgc    | aagcaagaac  | gcatagatca  | gcaacttttt  |
| 25021 | ttgctagatc | tttattttata | ttaagttcta  | ctaaagaagt  | tgatccatgg  | ctatagatct  |
| 25081 | ttaataggtg | ttcatctaaa  | acatcagtta  | agttctggcc  | taaagtttca  | attgcatctt  |
| 25141 | taaattttgt | aacatcatcc  | aattctacaa  | agctaagctt  | gccaagattt  | ttcactagcc  |
| 25201 | aaaatgatac | tctgccaaata | aatttctgca  | cgttcctcac  | tatttgtaag  | tatgagttaa  |
| 25261 | catcaatttt | tccatccaat  | tcatcaattt  | tctgccacag  | gctgtttaaa  | tcatacaggt  |
| 25321 | ggttaacaac | aatatatatg  | ttaaccgctt  | cttgatatct  | aattccagtg  | ttctcagcca  |
| 25381 | aattattgat | gaatatacag  | cccattctat  | tcactacatc  | atgtgcaatg  | caagtagaga  |
| 25441 | taatttctct | acgaagtgg   | tgttttaata  | tgaaatcctt  | aaactttggt  | accatctttt  |
| 25501 | taggaaaata | acctagcaag  | tagtcatgag  | atataagatc  | tttttcagac  | agatcggaat  |
| 25561 | gtataatttc | attttttatt  | gctgttctag  | cataagacat  | tagaacagag  | agctgaggag  |
| 25621 | aactgaaacc | ttctgcacca  | gttaacatcc  | ttgctatctc  | ttcttcagtt  | ggaagaaatt  |
| 25681 | ctacgcttcg | gtttaacagc  | ccagattttt  | ctaaactgag  | cagtaacctg  | tggtgctgct  |
| 25741 | ccaatctctc | tttagcttgc  | aaacactcaa  | gaagtaatgc  | ttttgtttca  | attttgttgt  |
| 25801 | ggttctcaag | cacttttgat  | gcaacttcat  | ccaccatact  | tgccagtatt  | tcattccttt  |
| 25861 | tttctaaaga | aataccccct  | gctttcatag  | ctgaaacaaa  | tgcaatctta  | atgttaactt  |
| 25921 | caaggtccga | acatatcact  | ccggctgaat  | tatcaacaaa  | gtctgcattg  | atatatccac  |
| 25981 | ctttttcagc | atattctatt  | cttccaaact  | gtgtacaacc  | aagattttcca | ccctctataa  |
| 26041 | acatagaagc | tctaatatct  | ttaccattca  | ctcttaactc  | atcgtttgct  | ttgtcaccga  |
| 26101 | ccatgctatg | attttcactc  | tttgccctaa  | caaacgtgcc  | gattcctcca  | ttccatatga  |
| 26161 | agtccacttt | tgctttcaac  | agatatctaa  | tcaaatcact  | tgagggtagc  | atatcttctg  |
| 26221 | ttatatcaaa | gcactttttt  | atttcttgag  | aaatgtttac  | ttgcttactg  | ctacgctcaa  |
| 26281 | atactcctcc | accctgagag  | atcaaactct  | tgttataatc  | catccagggt  | gaaaatggta  |
| 26341 | actcaaagag | acgttttacgc | tctgtgaaac  | tcttttctgc  | atcagggttt  | gggtcaacaa  |
| 26401 | aaatatgcat | atgggttaa   | gcgcgatta   | aatgtatat   | ttttgaaagc  | agcataccgt  |
| 26461 | ttccaaatag | atcgccagcc  | atatctccaa  | tcccaattac  | agttacatct  | tggtaaatat  |
| 26521 | ccttattcat | tttccaaaaa  | tgccctctgt  | ctgcaatcca  | tgcacctctt  | gctgtgatac  |
| 26581 | ccatcttttt | gtggtcataa  | cctgctgatc  | caccagatgc  | aaatgcatca  | ccaagccaaa  |
| 26641 | aattatactc | agaggctatt  | tggttggcat  | aatcagaaaa  | tgaagcagtg  | cctttatctg  |
| 26701 | ccgcaaccac | caagtatgga  | tcgtcttcat  | cataccta    | cacatccttt  | gggtggaatta |
| 26761 | ttttaccatc | aactacatta  | tcagtaatat  | caagcattcc  | tctaatagaa  | ctcttatagc  |
| 26821 | actcaacact | tttctctctt  | aaaatattct  | tatctttata  | agcttgcttt  | attacaaacc  |
| 26881 | caccctttgc | accaacaggg  | acaataaccg  | cattttttgt  | catctgagct  | ttcatgagcc  |
| 26941 | ccaaaacttc | agtgcgaaaa  | tcttccgtcc  | tatccgacca  | ccttaagcca  | ccacgggcta  |
| 27001 | atttccctcc | tcttagatgt  | atccccctca  | aaagggttga  | ataaatatac  | aattcacgat  |
| 27061 | acggacgagg | atcaggtaaa  | ccattttatt  | tacttgagtc  | aaattttgta  | gataaatatg  |
| 27121 | gtttatcgtc | ttgataataa  | ctggctctta  | aagtagccat  | tatcaagtta  | aatatcgagc  |
| 27181 | gcaaaacgta | atcatgtgaa  | acattgctga  | tctcttttag  | aagttcctca  | attttttctc  |
| 27241 | tgacaatgtc | cgtagtttct  | gctctatcaa  | tgtctatgtt  | aggatcaaat  | cttgcatgaa  |
| 27301 | atagttgtat | caaatacttt  | actatttttg  | gatgctctga  | gactaccttt  | tggatatatt  |
| 27361 | ctggattgta | gttaaatgac  | gtctgcttta  | ggtaagcact  | taacgctcta  | accagaagca  |
| 27421 | cttctttcca | cttgagccca  | gcaataatga  | tcaaaactatt | gaaatagtca  | tttttaattt  |

|       |            |             |             |            |             |             |
|-------|------------|-------------|-------------|------------|-------------|-------------|
| 27481 | ccttgctaaa | cacttttcgca | agtgttattt  | caaattgctc | ttttagagta  | atgttgtcta  |
| 27541 | ttaattcatc | gactcttgac  | aacacaaaat  | ggtgtatcca | tattccgcgc  | ttaatttcta  |
| 27601 | tgtaatagcc | attatgagat  | agaatcttag  | ctcccaaatt | cttagtaatt  | cttaatatct  |
| 27661 | tcgataattc | aagacctcca  | ttgctcgaag  | tgtaaaccct | taattgataa  | ttaagattgt  |
| 27721 | cacgagtaag | tcttaaactcg | acctcgctaa  | ctcttttttt | cctcactatc  | tccaattttt  |
| 27781 | tcatatcgta | atatgcgtca  | tgaggttcga  | aactctcttg | atagcttatt  | ggaaatgcct  |
| 27841 | tgcaataacg | gatgaatata  | tcctcaacag  | tgctaaaagt | attatataaa  | ttgtctataa  |
| 27901 | aacgatcttc | ccattttttcc | gtaatgttcc  | ttaatttggt | ttcgatacgc  | aaaacttcat  |
| 27961 | catcaggaat | actagcgttt  | ttagccttta  | gcaccacgtg | caatttcatt  | aagtcatatt  |
| 28021 | cgtttataat | gtggtggtta  | taaatatctg  | aactttctgc | atttatctca  | tccttcaata  |
| 28081 | tattgcttat | cttgagcatt  | agcctggagc  | tagcataacg | catcggtatc  | agcactatac  |
| 28141 | aactagtaaa | cgctccctta  | cttcttaagc  | ataacttgac | tcttggtctt  | attgcaaggg  |
| 28201 | acataataga | agtacaaaatt | tgaaataatt  | ctttctcatt | agactggaac  | aattcatcac  |
| 28261 | atgagaatac | ttgtaaaata  | taaattagag  | ctttgttatt | gtggcccccgc | gttacaaacc  |
| 28321 | ctgcactttt | ttctataaact | ttacttttat  | ctcttattat | tggaatagtt  | ctaatatctt  |
| 28381 | ggacctccgc | tacagaagta  | aatagcccga  | aaaaacgccg | ttcctttacc  | acattaccct  |
| 28441 | ggcatcaaaa | ttcttttact  | cctatacaat  | tcatgtatgt | acgccgatgg  | actattgaga  |
| 28501 | ttagatctga | tctcaatatg  | tatagggaat  | caaggtttgc | agaaggaatc  | aacgtacttt  |
| 28561 | gacctactct | catcaggcca  | aggctccttt  | tgctgtcaca | gacgagtttt  | tcactctttac |
| 28621 | cagcaatata | ttcttgataa  | cctagaaata  | cgaagttatt | attctttaac  | caaactagaa  |
| 28681 | aatctttttg | ctcttgattt  | cggtctggtg  | tcattccagt | gcgtgacact  | ggaatccacg  |
| 28741 | tgctcttttc | ctggatccca  | gtatcaagta  | ctgggatgac | agaaagactt  | gcctcatcaa  |
| 28801 | gtttcttgag | cattaagtgc  | caatctttca  | caacgcaatt | aaccgctttc  | agcgttttct  |
| 28861 | gtagagattc | ttttaatgta  | tcaacaaagc  | tgctacttat | acctttgata  | attacatata  |
| 28921 | tgactgactc | tttgactcca  | ttgctttctt  | caaagagta  | aatctcgtct  | attaggccat  |
| 28981 | cttttctttt | aatgttaatt  | atgctgttgc  | tgtaatagca | tatggttaaa  | ttgtgcgatt  |
| 29041 | taatagttgc | aataacagaa  | tcaacaaaaa  | atggcatatc | atcgtttggt  | atcttaatcg  |
| 29101 | tggtaaaatc | gccttctatt  | cctggtatat  | catctatatt | gcttactact  | aacttacttt  |
| 29161 | catctttctc | tttttgagaa  | acaaaattgt  | aagcatcggt | tacaatatat  | agcaaaaact  |
| 29221 | tatcattggc | ttttaggtcg  | cttttataaa  | caaaactata | aaaataactta | atgaattttt  |
| 29281 | taattttttc | tttatcttgc  | tgattttctt  | gatcagctag | cttaaataaa  | gactcagtgt  |
| 29341 | caacattatg | atctatacac  | atttttttta  | acaaaaatac | acagtgaact  | taaacctttt  |
| 29401 | taactaagat | ttcattatca  | agagcgtaca  | ctattagctc | atcattttct  | actacttccc  |
| 29461 | ctgataaaac | taatttagct  | aaattatttt  | gaatacactc | ttgtataacc  | ctttttaagg  |
| 29521 | gccttgctcc | atattcaggg  | tcatagccag  | tttgtgctat | tagttcttta  | gcttcctgcg  |
| 29581 | acaaacttat | actcagttta  | cgcttagcaa  | gtgttttttg | taaataagaa  | aattgaacat  |
| 29641 | ctataatttt | atagatgtca  | tctctgggta  | aactgtgaaa | tataataatt  | tcatccagcc  |
| 29701 | tgtttaaaaa | ttctggacga  | aatgttgatt  | taactatttg | catcacttca  | tttcttacag  |
| 29761 | aatcaacatt | cccttttagc  | attatctcag  | cgccaagggt | agaagttaaa  | atcagtatgg  |
| 29821 | tgttgcgaaa | atcaattaat  | ttaccatgac  | tatcagtgag | tctcccctca  | tccaagatct  |
| 29881 | gtagcaatag | attaaatata  | tctggatttg  | ctttctcgat | ttcatcaaac  | agaataacct  |
| 29941 | gatatggcct | tcttcttacc  | gcttcagtta  | atctgccacc | ttgttcatag  | ccaacatacc  |
| 30001 | ctggaggcgc | gccaattagc  | tttgaacag   | aatgtttttc | catatatctt  | gacatatcaa  |
| 30061 | aacgcagaag | cgctgattga  | tcgtcaaaaca | gaaattcagc | taaggctttc  | gcaagttcgg  |
| 30121 | ttttaccaac | cccggttgag  | cctaagaata  | agaatgaacc | aaaaggctga  | ttagtatctt  |
| 30181 | gcaccccaga | gcgggagcgc  | ctaactgcac  | tacttatcgc | ttctattgca  | tctttctgcc  |
| 30241 | ctattactct | tcttcctatt  | tcattctcca  | tgttgagaag | tttttcectt  | tcgctgtgca  |
| 30301 | tcatgttata | aactggaatt  | cctgtccact  | ttgaaacaat | gtttgcaata  | tcactctccag |
| 30361 | tcacttcttt | ctttaagaaa  | ctatcagtaa  | ccttttcctg | attttttaat  | tcattctcaa  |
| 30421 | gctgaggaat | cacaccatac  | atcagctctc  | ctgctcttcc | caaattccca  | ctacgctgaa  |
| 30481 | ctaattccaa | ctcttttcta  | gcgttatcta  | atttttcggc | tgtttcttgt  | attctagcta  |
| 30541 | ttttattctt | ttccatctgc  | catttgctgt  | tcaagtcagc | aaatttactg  | tttagatttt  |
| 30601 | cgatctcttc | atttatcttt  | tttaaacgct  | gtttagaatt | ttcatcaact  | tcttttttta  |
| 30661 | aagcctctgc | ttcaatcttt  | agctgtataa  | cctttctctc | aagttcatca  | ataacttcag  |
| 30721 | gcttgctatc | catttcaatt  | ctcacccctgc | ttgctgcttc | atcaatcaaa  | tcaattgctt  |
| 30781 | tatcaggtaa | aaacctatct  | gttatatata  | tattggacaa | cgttgcagca  | gcaattattg  |
| 30841 | caccatctgt | aattcttata  | ccatgatgca  | cctcatatct | ttccttcaaa  | cccctgagta  |
| 30901 | ttgaaatggt | atcagtttca  | gttggttgag  | agataaacac | aggctgaaaa  | cgccttgcaa  |
| 30961 | gtgcaggatc | tttttctata  | tgctgacgat  | attcatctaa | agttgtggct  | cctatacagc  |
| 31021 | gaatttctcc | acgcgcaaga  | gcaggcttca  | gcagattcga | ggcatccatt  | gcaccacttg  |

|       |             |            |             |             |             |            |
|-------|-------------|------------|-------------|-------------|-------------|------------|
| 31081 | ttgctcctgc  | tccaactaaa | gtgtgcaatt  | catcgatgaa  | taatataatt  | tttccctccg |
| 31141 | ctctcgaaat  | ctcattaatc | actgctttta  | acctttcctc  | aaactctcct  | ctaaacttag |
| 31201 | tgccagcaat  | tagtgctcca | agatccaaag  | ctaagacctt  | tgcacatgc   | aaaccaagt  |
| 31261 | gcacatcggt  | tgcaacaatt | ctatttgcaa  | gcccccaac   | tattgcagtt  | tttccaacac |
| 31321 | caggttcacc  | gatcagcact | ggattatfff  | ttgtccgcct  | cagtgcatacc | tgcatagttc |
| 31381 | ttctgatctc  | ttcatcacga | ccaattacag  | gatcaagctt  | tccttgcata  | gcaagctctg |
| 31441 | taacatcttt  | tgtatatfff | tttgccgcgt  | ttaatffff   | ctcactgttt  | ggcgagtcgg |
| 31501 | cactgctgcc  | ttgtctcatt | tctgcaataa  | ctgagttcag  | tttttgtaga  | gtcacaccat |
| 31561 | tctctgccag  | aattttgcct | acagtatcat  | ctttttgtgc  | agtgaggccc  | tgtagtaaac |
| 31621 | gctcaacagc  | aacaaatgaa | tctttatfff  | ttcttgcaat  | accaattgaa  | tcttcaaaaa |
| 31681 | cttttgctat  | ttctcttgaa | agttgaaggc  | caccacttcc  | tggaccttca  | attactggca |
| 31741 | acttttttat  | tgcgctatcc | acagcatcag  | aaatactttg  | cacacttcca  | ccacaagcgt |
| 31801 | ttatcaaate  | ctgaactaaa | cctgattcat  | cttcaagcat  | cacttttagt  | aaatgctcag |
| 31861 | gcataaaaaat | ctgatgccca | gctcccaacg  | ctttcatttg  | agcactttga  | attagacttt |
| 31921 | ttgcttttttc | ggtaaattta | tttaagtcca  | taacaccagt  | taaattcgta  | tttgctgatg |
| 31981 | tatataacaa  | ttgatttcat | aaatttaaac  | ctaaagtgtg  | ttattgttag  | gtatgaaatt |
| 32041 | taaaaactttc | ttaaaaaagg | aactagaggt  | tgtccggaaa  | ctagtaaatt  | caagcatatt |
| 32101 | ccctcttttaa | cataacccta | ctcatagcta  | ggtatatgaa  | attctcagtg  | gatgttgtag |
| 32161 | gtaaatacata | ctccttcgat | agccttctat  | tcctattaac  | ccaagcaaaa  | gtcctttcta |
| 32221 | caacccatct  | tcttggtgtg | actttaaac   | cttggttctc  | tgttggtagt  | agctcaggtg |
| 32281 | gcgtatcttt  | gtgcacccaa | aatctacatg  | gaggcctttt  | aacaatttca  | atatctatgt |
| 32341 | catattcttc  | ctttatgtga | ttctttaaat  | ttcttccttg  | gtatcccatg  | tcagcccaca |
| 32401 | tttttttaaac | tttagtatat | tttggttctca | tattgtttaa  | tgctatttta  | ataccatctc |
| 32461 | tatcatttttc | gttagcagcg | cctacgtaac  | aacctagtat  | aaaaccctga  | gtgtctgtaa |
| 32521 | ttatatgcct  | ttttctaccc | tttacttttt  | tacttccatc  | atagcctttg  | atccccctt  |
| 32581 | ttctgtagtc  | tttacagatt | gactatctac  | tatacaggca  | ctcggctgct  | cattccttcc |
| 32641 | tatttttctt  | ctactatatt | ttgtaatttc  | ataattcatt  | ttctcaaaaa  | ttccttgctt |
| 32701 | cttccattgc  | ctgaactgct | catacacagt  | cttccatagc  | ggaaaatcat  | ttggtaaata |
| 32761 | ccgccattga  | caccctgtac | gcaatacata  | gaaaattgct  | tctaataatt  | ctcttttgct |
| 32821 | atactttggc  | ggccttcctc | ctttcttgta  | tgatactctg  | aagtgttttt  | ctattcctgc |
| 32881 | ccattccctt  | tcgcttagat | ctggttgata  | cttttttctc  | atctttaccc  | cgtactaaaa |
| 32941 | tttcagatat  | tatagccttt | tacttatfff  | cggacaacct  | cttatactga  | ttctctctcg |
| 33001 | ttttcttcct  | ggaatatctg | cataaatttt  | ctttcctatt  | ggagcacgct  | catactctcg |
| 33061 | gtataaccta  | ttatcaactc | ctgcttcac   | tatatataag  | atgctggaat  | ggtctatfff |
| 33121 | tgagattttta | tcggtaaate | gctgcctatc  | ttcttgattg  | cgctcttgat  | atagtgtaac |
| 33181 | tttttttttaa | agtaattctt | agctgtttca  | gcctatacca  | aattgaattt  | attccaaatc |
| 33241 | caagatttttg | tttcatctct | gccagcgat   | gatctggatt  | ctttttaaca  | tattcttcga |
| 33301 | gtatttttttg | gtctatffff | cgaataaagc  | tgccgttttt  | cgatggcctt  | aggctttcac |
| 33361 | cagcggcttt  | ctttcttaac | cagcggtaaca | gagttgctat  | tcctatctcc  | aaaagctctg |
| 33421 | ccacctcaac  | ctttgacttc | cctttttcta  | tcacgcatac  | tgccctttcc  | cttaaatcca |
| 33481 | cactatacgc  | cattataact | caaatagctt  | attatacctt  | tatcattttac | tttggaagt  |
| 33541 | actatatcaa  | tggcattatt | taccttgcat  | agctgctcaa  | ttgttgacaga | atcagcacgc |
| 33601 | cctttgcttt  | caatttcttt | tagtttgcca  | tcattttatta | atttaaatgg  | ctcccatgat |
| 33661 | gaagcgagtt  | cattgatagc | gtgagcgata  | tcgggtgagt  | acataatagc  | ctcctttgaa |
| 33721 | aatgaaatga  | aaatggaaat | aaggtaatag  | gaatgggtact | catagatggt  | tcctacatc  |
| 33781 | tgtacgaaca  | ttgcaggtgg | cagatgcaag  | tagctgcact  | ggaatcccaa  | aaaaaggatg |
| 33841 | atgtcatccc  | agtgtccct  | ttcttgteat  | cccagtctgg  | gatccagatt  | gggcactaag |
| 33901 | ttggtaaaca  | cgaaagcgct | ttacaacggt  | tttgatggaa  | ttgtgcgaaa  | gccagtgtca |
| 33961 | agcactggaa  | tgacatcatc | tgttgctctc  | aaaaataaat  | gttcgtacag  | ttatgtgccc |
| 34021 | aggcactggc  | atgatatcat | ttgtttatct  | gttgaaaatg  | taaaccgaaa  | aatagcgtgg |
| 34081 | cactttgtgc  | cacgcttagt | actgtaagct  | taatccagta  | attaaattta  | gcgaggtaaa |
| 34141 | ataaaaagata | acaacactat | ataatgttcg  | ttcttttatg  | tcaagcactt  | ttttgaattt |
| 34201 | ttttggtgat  | aatttttatc | cagttatfff  | attattgtag  | tataatttca  | atgccagata |
| 34261 | ctatcattat  | gatcactatc | taaattttaa  | tcgtaattat  | catcaaat    | atatatcccc |
| 34321 | tccatctctt  | ctctatgcaa | ttcatgtgaa  | tcacctaaag  | ctttttgatt  | agaaacgtca |
| 34381 | acacaatact  | gtaacagtg  | tcttaatgct  | ccagcactat  | cttgatctaa  | attaaaattg |
| 34441 | ctaaaatcaa  | atttctgcat | attctccaca  | tgtccttctc  | tacataacct  | acatatctta |
| 34501 | gcaaaagccc  | tttctacttt | tcgactccaa  | gcattaagaa  | agtaaggatc  | tactactttg |
| 34561 | ctaaattggt  | tctctatctc | ttcaagagag  | ctctctggat  | taagttctaa  | tattactttg |
| 34621 | aaaatcccac  | tgccatggaa | tctataaaat  | ttactagata  | agctatcttt  | tacaaaatta |

|       |             |             |            |             |             |             |
|-------|-------------|-------------|------------|-------------|-------------|-------------|
| 34681 | actgcatcat  | ctattgtaac  | accagagcga | gattcaaata  | tcattctcaa  | tgctccataa  |
| 34741 | caactatcaa  | tacccaaaatt | aattattttt | tccataaaat  | caattacctc  | ttctaaggaa  |
| 34801 | atttgtggct  | tattcctcaa  | gataacttct | aaactcttga  | caaaattatg  | cccatgctga  |
| 34861 | cccatagcat  | gggttttccc  | atttattgta | taatgatata  | gcttcttatt  | ttctattata  |
| 34921 | tgcttattgc  | actggtagat  | atgtagctta | ttcaatttgc  | cagaatattc  | ctctatttcc  |
| 34981 | ttatctggta  | attttgagcg  | gaattccttg | attacttcgc  | gtattattct  | attgatatta  |
| 35041 | ctcatgctta  | ttcctaatta  | atatgttagt | atttttataa  | attaagttat  | tataataaaa  |
| 35101 | ttctttcatg  | gatttcaata  | ttagctccgc | actacttgta  | gtttttgtaa  | tggtctgccc  |
| 35161 | aatgacgata  | taatcagctc  | ctgaatttat | tgcttctttt  | ggtgttgctg  | ttcttttttg  |
| 35221 | gtcgtcatga  | cctggatcta  | tacgaattcc | tgagagtaata | attttaaagt  | cttcaccgca  |
| 35281 | ctctcggcgc  | acttcttgag  | cttctagtgc | agaacagact  | attccatgga  | gtccaatctt  |
| 35341 | ttttgcaagc  | tttgcaagca  | aaattacctg | tgattttgcc  | tctcttgcta  | ctccaagctc  |
| 35401 | gtttaaatcc  | tcattgctca  | tactagttag | caactgtcact | ccaatcagct  | ttatttttgt  |
| 35461 | gccttgcaact | acacttagcg  | cttcttcaag | catttttgtt  | ccaccgctga  | tgtgcagagt  |
| 35521 | taacattttca | atgttcagaa  | cttttattac | ttcaactgtt  | ttggctacag  | tgtttggaat  |
| 35581 | gtcatgcaat  | ttcagatcta  | aaaaaattgg | tacattgcat  | tttgcaactt  | cttgcaactc  |
| 35641 | agaaagacct  | tgagcagcaa  | aaaattctaa | tccagccttt  | accatgccaa  | ctttaccacg  |
| 35701 | cagagcatta  | gctagagaaa  | tagccttatt | taagtcttgt  | gtatccagtg  | cgcataattat |
| 35761 | tgggttcatt  | atcctgcatg  | atttatctta | taataagact  | cattgttgtg  | ttttgcaaat  |
| 35821 | actttcactc  | tgattacggt  | cataagattc | tgtcaatagt  | gaatttgga   | atgtgatcgg  |
| 35881 | agtggatgag  | cgacttgcac  | atccaagatc | ctccagtaaa  | caatcaaacg  | tttctcttga  |
| 35941 | tgggtgattca | catctagaat  | cttcacctag | cgtgaattgc  | ataatttcct  | tcaatataaa  |
| 36001 | ctttattttt  | tgagtctcct  | gtaatattat | ttttctacta  | cgatctccga  | tgccttcatt  |
| 36061 | attgtttacc  | aatttttcta  | ccttgtctac | cacagattct  | aacatttccg  | gtaaataacc  |
| 36121 | ctttttctct  | tctgcatttc  | tcaacaaatc | ttcttcaagt  | tgttctattt  | gactgtctcg  |
| 36181 | ctctaaaagt  | aaatttttta  | aaccttttac | ctcattgtta  | caatcttttc  | ttattccgct  |
| 36241 | taactcaaaa  | gactgatttt  | caattaaacc | atgtgcttca  | tctaactcgt  | caaatttctt  |
| 36301 | ttccaatttt  | ttagataaat  | tttccttttc | tttattgatt  | tttctgattt  | cacatttttag |
| 36361 | gtcatctaat  | tttgatgca   | actttttttc | ttcctcatat  | aatatatctc  | tttctttata  |
| 36421 | aaatatgtct  | tctttcttac  | gtaatatatc | tctttcttta  | taaaatttgt  | cttctttctc  |
| 36481 | gtataactcc  | cttattttct  | tacgtaattt | ttctacttcc  | tcattcaatt  | ttttattttc  |
| 36541 | taattctttg  | cattgattat  | tgtctatatt | ccctttcaat  | tctgtttata  | gttcttcttt  |
| 36601 | ttcttgtaac  | tgttcacgta  | aacacgagat | tttaagatgt  | aattcttctt  | ctcgtgcaac  |
| 36661 | aagcttatct  | atttcctctt  | ttgttttgct | caattcattg  | tctattttcaa | acgtacgatt  |
| 36721 | ctttgctggt  | tctaattttt  | tctctaaaga | tttttttctt  | caagaagaga  | ttctctctca  |
| 36781 | acttctgact  | cattttacttt | ctgatccaat | cttttttgctc | tcttgtctaa  | attttgcttc  |
| 36841 | tctctagtta  | attcatgtaa  | ttgattcttc | acttctttgt  | ttgcagcttc  | ttcagcttct  |
| 36901 | ttttccagag  | ttatttttatt | ttctaactct | tgctctttct  | gagcgaattt  | atttctctca  |
| 36961 | acctctattt  | ttttattatt  | actaattatt | ttatacgaaa  | gtgcaagcac  | caaaatagat  |
| 37021 | aatgtagcta  | aagcaagaat  | tagaggaaga | ggcacattag  | aaattacaat  | aagcgctaaa  |
| 37081 | gatgtaagta  | acgtaagagt  | agctaaggaa | ctagctacaa  | aataaaatgc  | attagcctca  |
| 37141 | ctaagcaaat  | tgctcattac  | tcccctccca | ccacggacaa  | aactccagca  | gtcttgtata  |
| 37201 | tatttattaa  | aattctctta  | tctgtggagg | aattatagtg  | ctgcacctac  | aacaaacttt  |
| 37261 | cctttttcag  | tctactagct  | aaaaatggct | aagggttttat | gtatccagtg  | tacaactgta  |
| 37321 | ctcaaaatgt  | ctagtggcta  | ttgatcgggg | tagaacatcc  | actggtatat  | ccaggatctt  |
| 37381 | ccacaaatga  | aggaacagac  | gtttcgctcg | gcaaatattg  | tgcaacttct  | tctactaaca  |
| 37441 | cagactttgt  | tgcttgaatc  | acttgtaata | ttactttttt  | atcatcatct  | ctgatcactt  |
| 37501 | cattttccct  | tactaatttt  | tctacctcat | ctgttacata  | ttctatcatc  | cgttgcaaaa  |
| 37561 | aaagcacttc  | ttcttttttc  | ttttccaata | aagctttttg  | aagttgttct  | atgtgagagg  |
| 37621 | attgcttcaa  | aagtgaactg  | tttaattctt | tcaccttatt  | atcgcgatca  | tcattcactg  |
| 37681 | ttgttaatgt  | gttatcaaat  | tctttctctt | ctttttgtaa  | agataatgac  | tccttttcca  |
| 37741 | gtcctttaat  | tttagataag  | tactctttct | cctttgtaca  | caatttatca  | actttacttt  |
| 37801 | caagatcagt  | gcgcttttga  | cgttcatcac | taactttacc  | ttctaattct  | ttcttttctt  |
| 37861 | tttccgactg  | gcataaactt  | ttctctaat  | cttctatgtc  | gctttctgag  | ctctcatggt  |
| 37921 | gttcttccga  | ttctaaagtt  | tttaattggt | ttacttcttc  | tacttctact  | ttttttctta  |
| 37981 | acatagttaa  | ttgagtacgc  | agagaagaag | cttccctact  | tttatgttct  | aattccaagt  |
| 38041 | ttaattcatc  | ttcatattcc  | aatcttaagc | gtaactcatc  | ttcatattct  | gactttaaac  |
| 38101 | ataacttatt  | cttttcaact  | tctaatttgc | attgacacaa  | ttcctccatt  | aaagaatcca  |
| 38161 | ctctttcatt  | caatcttgta  | ttttcatcac | gtaactcttg  | gtgttcaaga  | gaaagcatct  |
| 38221 | cctccttatg  | ttctaactga  | ccttttactt | ttgcttccaa  | ttctacatta  | ttactaatta  |

```

38281 ttttacatga aagtgcaagc accaaaatag ataatgtagc taaagcaaga attagaggaa
38341 gaggcacatt agaagttaca ataagcgcta aagatgtaag taacgtaaga gtagctaagg
38401 aactagctac aaaataaaat gcattagcct cactaagcaa attgctcatt actccccctc
38461 cccccacgtt cagcagtctt gtatatattt attaaaattc tcttatctgt ggaggaatta
38521 tagtgctgca cctacaacaa acttcccatc ttcagtctgc tagctaaaaa atgacttaga
38581 ccttggtgat cgagtgtacc attgtactta taatgtctag ttagctattg atcagggtag
38641 aacatatact ggtatatcca gaatcacata aagcgtcatt cagcttatgt gatggctctg
38701 atgtgtattg ctgtgattct cctatagaat tttcaatttt cctgttagtc tgcttattcg
38761 acaccttttt aatattatga gtcctcttaa aacttcgaca aatagccgca gtcttagtct
38821 tgtcacgtac tttacttgca caaccttcta tttcctttaa taaactaatc agatttgctg
38881 gtgaaaaatc ctactagta ttgtttaaaa ttgtatgagc gatactttgc aaattttcct
38941 tctgacaata ctcgttgatt atttttttac gcgtatctgt acctaattgta ggaatctcaa
39001 tgtgattgca taaacgaccc tcccctaaca agtgccttat ctaaaatacc tatatgatta
39061 gttgcagcaa tcaccttcac accttttaca tggtcagagc catcaatttt agttaagaaa
39121 tgttttaaat atcgtatatt atcatcagaa ctatacgctt tgccaaagcc ttcaatttca
39181 tctataaaaa ctatacaagg agcgttttct tctgcttttt taaaaagatc atttatattt
39241 tttatattaa acaaactaga accagaaaca cttataaatg cagatgtatc tttagtttca
39301 ctcgcaattg ccttagcaat catagtctta ccagttcctg gtagaccatg caaatgtat
39361 ccttctcctt tttttagagc cgcactctgat tctttttgtg attcataaat ctctttcagc
39421 ttttgtttct taccatttgg aagtataaca tcatcaaatt ttgtcttata tcttttttta
39481 cttttttcat aaaacttcat ctgcagctct tcttttactt caacttcctt tatgagacta
39541 ctaagccttt cttccactgc atcttctatt aactttttca cttcatcttt tgcagcacca
39601 ttaagccctg ccattagctc tttcttttagc tttccactg catcttctat taactttttc
39661 acttcatctt ttgcagcacc attaagccct gcctctagct cttcttttgt tgcagcacta
39721 gcaaactctc ctcttagctg ttcaacttca tcttttggtg cagcattagc aaactctcct
39781 cttagctggt taacttcatc ttttgttgca gtaccattaa gccctgcctt tagctcttct
39841 tttgttgcag cgcttgctcc tagctctttc acttcattgt taagcttatt tagctcctct
39901 tttgttgcaa cactagcaat ctttaccttt agctcttcca cttcatcttt tgttgcgca
39961 ccattagctt gccttgaaat ttcattctaat tttgtttcga gatcactaac tttcttattt
40021 agcccttctt ttgttgcgag gcttgctcct agctctttca cttcattact aagcttattt
40081 atctcttctt gtgttgcgag actagcaatc tttgccttta gctcttcac ttcattcttt
40141 gttgcagcac cattagcttg ccttgaaatt tcatctaatt ttgtttcgag atcactaact
40201 ttcttattta gccctttgat ttgaggttct aagctttgta ttgtattttc ttgctctgca
40261 gctaattcag ttttttcat aagctccgct ccttgagcag ctaatttttt atttcgacta
40321 atcatcttgc atgaaagtgc gagtatcaaa gtagatagta tagataaact caaggcaaca
40381 gg

```

```

//
LOCUS      JAQZAU010000113                9509 bp    dna        linear    ENV 17-MAR-2023
DEFINITION MAG: Wolbachia pipientis isolate wEsol contig_55085, whole genome
            shotgun sequence.
ACCESSION  JAQZAU010000113  JAQZAU010000000
VERSION    JAQZAU010000113.1
DBLINK     BioProject: PRJNA929258
            BioSample: SAMN33142973
KEYWORDS   WGS; ENV; Metagenome Assembled Genome; MAG.
SOURCE     Wolbachia pipientis (insect metagenome)
ORGANISM   Wolbachia pipientis
            Bacteria; Pseudomonadota; Alphaproteobacteria; Rickettsiales;
            Anaplasmataceae; Wolbachieae; Wolbachia.
REFERENCE  1  (bases 1 to 9509)
AUTHORS    Fiutek,N., Couger,B.M., Roy,S., de la Torre,J.R. and Connor,E.F.
TITLE      Genomic assessment of the contribution of the Wolbachia
            endosymbiont of Eurosta solidaginis to gall-induction
JOURNAL     International Journal Molecular Sciences
REFERENCE  2  (bases 1 to 9509)
AUTHORS     Fiutek,N., Couger,B.M., Roy,S., de la Torre,J.R. and Connor,E.F.
TITLE      Direct Submission
JOURNAL     Submitted (10-FEB-2023) Biology, San Francisco State University,
            1600 Holloway Ave, San Francisco, CA 94132, USA
COMMENT     ##Genome-Assembly-Data-START##

```

Assembly Date :: JUN-2019  
Assembly Method :: FLYE v. 06-2019  
Genome Representation :: Full  
Expected Final Version :: Yes  
Genome Coverage :: 100.0x  
Sequencing Technology :: Illumina HiSeq; PacBio Sequel  
##Genome-Assembly-Data-END##

FEATURES

|        |                                                                                                                                                                                                                                                                                                                                                                                                                                                                                                                                                                                                                                                                                                                                                                                      |
|--------|--------------------------------------------------------------------------------------------------------------------------------------------------------------------------------------------------------------------------------------------------------------------------------------------------------------------------------------------------------------------------------------------------------------------------------------------------------------------------------------------------------------------------------------------------------------------------------------------------------------------------------------------------------------------------------------------------------------------------------------------------------------------------------------|
|        | Location/Qualifiers                                                                                                                                                                                                                                                                                                                                                                                                                                                                                                                                                                                                                                                                                                                                                                  |
| source | 1..9509<br>/organism="Wolbachia pipientis"<br>/mol_type="genomic DNA"<br>/submitter_seqid="contig_55085"<br>/isolate="wEsol"<br>/isolation_source="galls on Solidago altissima"<br>/host="Eurosta solidaginis MN-2018-EFC"<br>/db_xref="taxon:955"<br>/environmental_sample<br>/country="USA: Cowling Arboretum, Carleton College,<br>Northfield, MN"<br>/lat_lon="44.48 N 93.13 W"<br>/altitude="280 m"<br>/collection_date="2018-11"<br>/metagenome_source="insect metagenome"<br>/note="metagenomic"                                                                                                                                                                                                                                                                              |
| gene   | 278..427<br>/locus_tag="wEsol_01342"                                                                                                                                                                                                                                                                                                                                                                                                                                                                                                                                                                                                                                                                                                                                                 |
| CDS    | 278..427<br>/locus_tag="wEsol_01342"<br>/codon_start=1<br>/transl_table=11<br>/product="hypothetical protein"<br>/translation="MIDIQSQLKVALAEMDNITPKNIKCLQQEANAMIEDHQEVIDRF<br>CNIEL"<br>/besthit="qcoverage 97.9591836734694 , hcoverage<br>15.6862745098039 , similarity 93.8 , identity 87.5 ,<br>evaluate 1.21e-18 , alnlength 48 , Eukaryota , Arthropoda ,<br>GFR17405.1 patatin-like protein 5 [Trichonephila<br>clavata]"                                                                                                                                                                                                                                                                                                                                                    |
| gene   | 567..1031<br>/locus_tag="wEsol_01343"                                                                                                                                                                                                                                                                                                                                                                                                                                                                                                                                                                                                                                                                                                                                                |
| CDS    | 567..1031<br>/locus_tag="wEsol_01343"<br>/codon_start=1<br>/transl_table=11<br>/fullproduct="qcoverage 100 , hcoverage 100 , similarity<br>100 , identity 100 , evaluate 2.67e-86 , alnlength 154 ,<br>Bacteria , Proteobacteria , WP_209473029.1 hypothetical<br>protein [Wolbachia endosymbiont of Wiebesia pumilae]"<br>/translation="MALEQKTSKVENVKKNKKGIEKIKSLKTKPVEKELKRGKVFKK<br>GFKKLKGKIKKLNPIKVKKNKIIGSKKLAFLLSATIVAILPTFSLAPLPALAIT<br>SACVFSINFIKVKTLKKFIKQKRLAAKSEAEPKKLEEVSVQAKEESKQIFRDGK"<br>/product="hypothetical protein"<br>/besthit="qcoverage 100 , hcoverage 100 , similarity 100<br>, identity 100 , evaluate 2.67e-86 , alnlength 154 ,<br>Bacteria , Proteobacteria , WP_209473029.1 hypothetical<br>protein [Wolbachia endosymbiont of Wiebesia pumilae]" |
| gene   | complement(1145..2161)<br>/locus_tag="wEsol_01344"                                                                                                                                                                                                                                                                                                                                                                                                                                                                                                                                                                                                                                                                                                                                   |
| CDS    | complement(1145..2161)<br>/locus_tag="wEsol_01344"                                                                                                                                                                                                                                                                                                                                                                                                                                                                                                                                                                                                                                                                                                                                   |

```

/codon_start=1
/transl_table=11
/pfam="HTH_31 HTH_3 HTH_19 HTH_26 Pfam-B_114 HTH_19
HTH_31 HTH_3 HTH_26 Pfam-B_114"
/fullproduct="qcoverage 97.9289940828402 , hcoverage 100
, similarity 100 , identity 100 , evaluate 1.24e-226 ,
alnlength 331 , Bacteria , Proteobacteria ,
WP_209473031.1 helix-turn-helix transcriptional regulator
[Wolbachia endosymbiont of Wolbachia pumilae]"
/translation="MVKKVGGMFVSIRKPTIKGYNPEYIDSIDYKVGQVEICRLIQ
RYTQIDLADEIGVTYQEIHKYEQGYNPISITLYKIAKALSVNTADLLPEPKVLNEDC
YFEGEAEKILSLVRMYEKIENQELRKAIYSLVEFAKGYKESSRKEAIEEVSDNLVKED
ISISIIQLQATGLSTCKYDNTEKEVRIDSIDYKVGQRIEILQLIRGYTQEDLANKIGVT
PQEVHGYERGYIAIPLDILYEIAKALSVKVRVLLPEIKKDESNEVEISGHNKTENQES
WSRLSALVETLSKSMKVKKVKKAEKIKIAKDLVKAGVAINIILQTTGLTADELGEC
PKMK"
/product="helix-turn-helix transcriptional
regulator"
/besthit="qcoverage 97.9289940828402 , hcoverage 100 ,
similarity 100 , identity 100 , evaluate 1.24e-226 ,
alnlength 331 , Bacteria , Proteobacteria ,
WP_209473031.1 helix-turn-helix transcriptional regulator
[Wolbachia endosymbiont of Wolbachia pumilae]"
gene complement(2169..3092)
/locus_tag="wEsol_01345"
CDS complement(2169..3092)
/locus_tag="wEsol_01345"
/codon_start=1
/transl_table=11
/pfam="HTH_19 HTH_31 HTH_3 HTH_26 Pfam-B_114 Pfam-B_17975
HTH_31 HTH_19 Pfam-B_8788 HTH_37 HTH_3 HTH_26 Pfam-B_114"
/fullproduct="qcoverage 97.3941368078176 , hcoverage
98.6798679867987 , similarity 99.0 , identity 96.0 ,
evaluate 2.47e-193 , alnlength 299 , Bacteria ,
Proteobacteria , WP_209473033.1 helix-turn-helix
domain-containing protein [Wolbachia endosymbiont of
Wolbachia pumilae]"
/translation="MTADNPNFLDYKVGQKVRSCRLTKRYTQKDLAEKIGVKYVWILH
YEKGKRKISIRRLYSIAEALSVSIIIDLIPEHTISNEESYLENEGKEILDVEKYEKIE
NQELRNVVYSLITSAQASKEHSRKVARIEVAKNLIKAGVSVEIIFQATGLPTEEYSNA
EEKTTSVDYRMGQRIKKLRLMRKYTQEDLANKIGVTPQKIYDYEQGHITVPLERLYKI
AEALSVNIAVLLLGQIEEVVAKDELNGLIKEYKEIEDQELRNGFYVLIKSLSEGMQII
EENVKKTEKIEIAKNLLRLGISIDIASQATI"
/product="helix-turn-helix
domain-containing protein"
/besthit="qcoverage 97.3941368078176 , hcoverage
98.6798679867987 , similarity 99.0 , identity 96.0 ,
evaluate 2.47e-193 , alnlength 299 , Bacteria ,
Proteobacteria , WP_209473033.1 helix-turn-helix
domain-containing protein [Wolbachia endosymbiont of
Wolbachia pumilae]"
gene complement(3186..3311)
/locus_tag="wEsol_01346"
CDS complement(3186..3311)
/locus_tag="wEsol_01346"
/codon_start=1
/transl_table=11
/product="hypothetical protein"
/translation="MRLEEMNELLRQMEETPHSDHGRPTYIEMKLSDIEKLFERR"
/cog="MutL COG0323 638 DNA mismatch repair enzyme"

```

```

(predicted ATPase)"
/besthit="qcoverage 100 , hcoverage 71.9298245614035 ,
similarity 100 , identity 87.8 , evaluate 3.58e-17 ,
alnlength 41 , Bacteria , Proteobacteria , RDD33692.1 DNA
mismatch repair protein mutL [Wolbachia endosymbiont of
Cylisticus convexus]"
gene complement(3550..3762)
/locus_tag="wEsol_01347"
CDS complement(3550..3762)
/locus_tag="wEsol_01347"
/codon_start=1
/transl_table=11
/product="hypothetical protein"
/translation="MFKFFIFLSFECVDKKTAVRDHLRIASSTLDVFCTSFINPAVKH
LISPGDGCHKFGAVGDIKDTLFGVGA"
gene 3811..4743
/locus_tag="wEsol_01348"
CDS 3811..4743
/locus_tag="wEsol_01348"
/codon_start=1
/transl_table=11
/fullproduct="qcoverage 99.6774193548387 , hcoverage
99.6774193548387 , similarity 100 , identity 100 , evaluate
2.42e-207 , alnlength 309 , Bacteria , Proteobacteria ,
WP_209473041.1 Rpn family recombination-promoting
nuclease/putative transposase [Wolbachia endosymbiont of
Wiebesia pumilae]"
/pfam="PDDEXK_2 Pfam-B_9730 Pfam-B_12519"
/tigr="TIGR01784 T_den_put_tspse 273 conserved
hypothetical protein"
/product="Rpn family
recombination-promoting nuclease/putative transposase"
/translation="MTFSKFLDPKNDVSFKRIFGTEKNKDILIHFLNDILGFTGKNEI
KDIEFLSTIQDPDIAAKKQSIQVDVLCRDSTGAQYICEMQVAKTKGFQKRAQYYAAKAY
SRQADKGDQYHNLKEIIFIAIADCVLFPNKSEYKSKHTIRDEDTNEHDLKDFYFIFIE
LPKFPKNKEDQLENIVEKWVYFFRYADETSEEELEKIIGSDVVIKKAYEELNRFNWSE
KEFIAEQEIKRILDEQAVLAQKLDDATEKGREEGRQEGILIGEEKGEMKAKIAVAKN
LLKAGVSVDLIAESTGLSQAEIEQLQEESANRSL"
/besthit="qcoverage 99.6774193548387 , hcoverage
99.6774193548387 , similarity 100 , identity 100 , evaluate
2.42e-207 , alnlength 309 , Bacteria , Proteobacteria ,
WP_209473041.1 Rpn family recombination-promoting
nuclease/putative transposase [Wolbachia endosymbiont of
Wiebesia pumilae]"
gene complement(4723..5856)
/locus_tag="wEsol_01349"
CDS complement(4723..5856)
/locus_tag="wEsol_01349"
/codon_start=1
/transl_table=11
/product="hypothetical protein"
/translation="MYPIAPVKQGLYLPPFEKRGVKIDGKCVSITRSLSQLFSQSNE
SFLSNLKASSEIYERIAQGKQISKREEREVFVAFSKLLSNFERQLDSATSSIPSSLILN
TKKDRKAFSDLSNHIAEIEGDFAIHLVTSNHVVAIYRIGDNYAYFDSNVVVFVSELKNV
DQLMKIVEKAVESAGYKVGEGFLVEHFDVDKANSQLSKDKDRQILAKEIKTEHQLLAE
QDDELGLIKINGQELSRVQLYDFGTKINVEGSPVLLINAEMNLSSEKFQDHLDKREVS
MTAREYLDHLKDSENVKEIIQATKAIPFMGSKREIEEAEQTRRPKQSLLELAKGTINC
ILAAVSLTSASRSKSQLPEKVGNEPQTYLNDPTADKQLQRSVS"
/besthit="qcoverage 99.2042440318302 , hcoverage
48.9528795811518 , similarity 99.7 , identity 99.5 ,

```

evaluate 1.59e-242 , alnlength 374 , Bacteria ,  
 Proteobacteria , WP\_209473043.1 hypothetical protein  
 [Wolbachia endosymbiont of Wiebesia pumilae]"  
 gene complement(5807..8314)  
 /locus\_tag="wEsol\_01350"  
 CDS complement(5807..8314)  
 /locus\_tag="wEsol\_01350"  
 /codon\_start=1  
 /transl\_table=11  
 /product="hypothetical protein"  
 /pfam="DUF1703 DUF1703"  
 /translation="MPNEERPQDFELIELLIKEAGSVIGASAAEHPTQPSSEFKSFKA  
 RFLSYIDQIPSYLHSVNGGFFPHFFLGSFSTLVDTEIATKLDIEKVYFCFDGPKTLK  
 VAIIREGDIKGRGDAIDKIRLFVISEKGAPSATQKFSYGELSGALGRSQPARFQSVFD  
 NLGELRVKSVTIDKGNVNQQGVLVAVEDKKLHEDRALKDNFQEI KRELWLNPENDIAK  
 LTNSDIEEVKKSLLKILKKVSNFHSKYKDSLSYAEGAREAAHHGFTAGALVNFYRHN  
 LRVYLEQFAGRGYADIVLVPRGKDRSLNSIPIVIEVKAVTKEELEQLRKKGSKIKANS  
 KTTPSAALKQAEDYTKGFQPNVMRVLTTAENILCVGVNLDHPSPISDIVAKSRDQEIT  
 PLFNEILISIDGRNNGRVNEEGLKKKVQNNIKRIYHTFPGTGEKGDNHYFSRFLLGQS  
 LLLNEVEVLESNFKKHVFIYGENIPTAQSEPPQSQRKLDQKSKGQAGQPSRLDQSHG  
 VVTIVLVSKSAQKSVCMNIVETDGRDNVINKGIPLDKLRQEIGDRRVVELNLFNVN  
 KQKEKFEEYFSMEIRAPIPLAQYTSGMPDKFQGD FENIPYPDRLKEVFDEALESQLAS  
 SQDQSSSQSIDKYKGLFKKLGEAVLPFKVLIEKEAHTQAVLNGTFFSHYSIDIRLGEPQE  
 EDRALILTEFQTGRGKRIDMLVHGKIFADQAGSAKEYAPVGLEIKGPRKNVTVQRLKQ  
 EAVKQIEMYKECVTCKTLTDGNTVAFVGVVFDEKARDAGSLISTTEDFIMGIARHSSI  
 LSVEQLQSLHFNREQQEVFSRFVSHCTSKTRALFASI"  
 /besthit="qcoverage 98.4431137724551 , hcoverage  
 20.8576503425527 , similarity 79.7 , identity 67.6 ,  
 evaluate 0.0 , alnlength 822 , Bacteria , Proteobacteria ,  
 WP\_063631194.1 ankyrin repeat domain-containing protein  
 [Wolbachia endosymbiont of Laodelphax striatellus]"  
 gene complement(8345..>9509)  
 /locus\_tag="wEsol\_01351"  
 CDS complement(8345..>9509)  
 /locus\_tag="wEsol\_01351"  
 /codon\_start=1  
 /transl\_table=11  
 /fullproduct="qcoverage 100 , hcoverage 90.632318501171 ,  
 similarity 99.5 , identity 99.5 , evaluate 2.46e-292 ,  
 alnlength 387 , Bacteria , Proteobacteria ,  
 WP\_209473047.1 hypothetical protein [Wolbachia  
 endosymbiont of Wiebesia pumilae]"  
 /translation="RSGQKGHNLLAQVLSDKESWEEVGGLHGVKLNRRKVGRKFAVPD  
 SDNSFSRASRYKISCECCLEGEIRAI FEERKEELSAQGNESSLLEYHHLVRCCGEGPIA  
 QFWSHFISGYLDKLDLRGRHPY EYGLDCAVGWRRVEAVEFFWSKIKSLPENEMSAQKK  
 DEILMKNVAYSAGPNFRIYPDIFEFFFDQINTDRYLELLKRDLEKNGHYGS LNRIKDV  
 LSFDKFQELFDCLKPSDISED CYHTRLCSIEIQNYS GHYVDAAENLFIHMWMKEGFGR  
 HRAFVIKEEVEVIDPSTFFDRNLLVHWAKKGCMKAVWAVLNELSSDQ RVKQVNYIHS  
 ILAMQGDSASLDRFSAYCNKFTDKEPYREDVPGPSSNLTEAKVEKPHGQSRIE"  
 /product="hypothetical protein"  
 /besthit="qcoverage 100 , hcoverage 90.632318501171 ,  
 similarity 99.5 , identity 99.5 , evaluate 2.46e-292 ,  
 alnlength 387 , Bacteria , Proteobacteria ,  
 WP\_209473047.1 hypothetical protein [Wolbachia  
 endosymbiont of Wiebesia pumilae]"

# ORIGIN

1 ctccaagtaa ataagctctt agtctgtaat ccacaaaact cctaatttaa tatacaaact  
 61 tccatgatgt gctcatataa cttcgctgca aaaaagggtg atagcataca ggctctcttc  
 121 tacttactgt tctaaccata ttcacaaatt tttgctaaaa gtagcattag aagtattata  
 181 caagatatgt ctttaattgc ataattttta tagattttag atagagatta tctgagcagg

|      |             |             |             |             |             |             |
|------|-------------|-------------|-------------|-------------|-------------|-------------|
| 241  | gagttactga  | ctgatttttt  | tgtaatatata | gataagaatg  | atagacattc  | aatcacaact  |
| 301  | aaaagtagca  | ttagctgaga  | tggataatat  | aacacccaaa  | aacatcaagt  | gcttacagca  |
| 361  | agaggcaaat  | gcgatgatag  | aggaccacca  | ggaagtaata  | gatagattct  | gcaatattga  |
| 421  | actataaacg  | atgccaagca  | aactaaagaa  | ataaagcaaa  | gaaaggttta  | aaaaacatag  |
| 481  | tttcgcccac  | aaaacatact  | aaggggcaag  | aagctaaaat  | ttcaaacgat  | aagccaaaac  |
| 541  | cgctacatga  | gcaacctcta  | aagttgatgg  | cactagaaca  | gaagacctct  | aaagtagaaa  |
| 601  | atgtcaaaaa  | aaataaaaaa  | ggaataaaaag | aaaaaataaa  | aagcttaaaa  | acaaaacccg  |
| 661  | tagaaaaaga  | gctgaaaaga  | ggcaaagtgt  | tcaaaaaaag  | cttcaaaaaa  | ctaaaaggga  |
| 721  | aaataaaaaa  | attaaaccca  | ataaagggtta | agaaaaataa  | gataatcggg  | agcaagaagt  |
| 781  | tagcattttt  | actaacatct  | gctacaattg  | tggcaatttt  | accaacattc  | agtctagctc  |
| 841  | ctcttccagc  | cttagccata  | acttctgcat  | gtgtttttcag | tattaacttt  | atcgcagtca  |
| 901  | agacactaaa  | gaaattttatt | aaacaacgta  | aattagcggc  | aaaatccgaa  | gctgagccaa  |
| 961  | aaaagctaga  | agaggatatct | gttgaacaag  | cgaaagaaga  | atctaagcaa  | attttcagag  |
| 1021 | atggcaaata  | gatttactaa  | gtatataact  | acttttactt  | atatcttaat  | atactatttc  |
| 1081 | tgagtacccc  | tgtttttaat  | ccagaattca  | agtcaagttt  | atatcagaaa  | ggccttcata  |
| 1141 | cttgttactt  | catttttgga  | cactcaccca  | actcatcagc  | agttaggcca  | gttgtttgca  |
| 1201 | agataatatt  | aatagcaaca  | cctgccttaa  | ctagatcttt  | tgcaatcttg  | attttctctg  |
| 1261 | cttttttaac  | ctttttctta  | acaaccttca  | tactttttaga | cagagtttca  | actaatgcgc  |
| 1321 | tcaatctact  | ccatgattct  | tgattttcag  | tcttgttgtg  | tccacttatt  | tctacttcat  |
| 1381 | tactctcatc  | tttttttatt  | tcaggcagta  | aaacccttac  | tttactgat   | aatgcctttg  |
| 1441 | ctatttcata  | taatatgtca  | agtggaaatg  | caatgtaccc  | tcgctcatag  | ccgtgtactt  |
| 1501 | cctgaggtgt  | tacaccaatt  | ttatttgcta  | aatcttcttg  | agtgtatcca  | cgtattaact  |
| 1561 | gtagaatttc  | tattctctgt  | cctactttat  | agtctataga  | atctatacgg  | acttccttct  |
| 1621 | ctgtattatc  | atatttgcaa  | gtagataagc  | ctgttgcttg  | caagataata  | ctaatagata  |
| 1681 | tgctctcttt  | aactagatta  | tctgatactt  | cctctattgc  | ttcttttctg  | ctgctttctt  |
| 1741 | tgtaaccctt  | ggcaaattca  | accaatgagt  | agattgcctt  | gcgtaattcc  | tgattctcaa  |
| 1801 | ttttttcata  | cattctcacc  | aggcttaata  | ttttttctgc  | ctcaccttca  | aaataacaat  |
| 1861 | cttcatttag  | tacttttggt  | tcaggaagta  | gatctgcagt  | attaactgat  | aatgctttcg  |
| 1921 | ctattttata  | taatgtttca  | attgagatag  | gattgtaccc  | ttgttcatat  | ttgtgtattt  |
| 1981 | cctgatatgt  | tacaccgatt  | tcactctgcta | agtctatctg  | agtatatctt  | tgtattaacc  |
| 2041 | tacaaatttc  | cacttcttgc  | cctactttat  | aatcaataga  | gtctatatac  | tctggggttat |
| 2101 | agtagccttt  | aatagtcggt  | tttcttatag  | aaacaaacat  | acctcctact  | tttttcacca  |
| 2161 | taaatctctc  | atatagtagc  | ttgcgaggca  | atgtcaatag  | aaatgcctag  | tctaagtaga  |
| 2221 | ttctttgcaa  | tttcgatatt  | ttctgtcttt  | ttaacatttt  | cttcgataat  | ctgcatacct  |
| 2281 | tcagataaaag | atltgatcag  | tacataaaaat | ccgttgcgta  | actcttgatc  | ctcaatttcc  |
| 2341 | ttgtattcct  | ttattaaacc  | gttcagttca  | tcttttgcca  | caacttcttc  | tatttgccct  |
| 2401 | aacagtaaaa  | ctgcaatgtt  | aactgataat  | gcctctgcta  | tcttgataaa  | tctttcaagt  |
| 2461 | gggacagtta  | tatgtccttg  | ttcatagtca  | tatatatttct | ggggtgttac  | accaatttta  |
| 2521 | tttgctaaat  | cctcttgagt  | atattttctc  | atcagcctta  | gtttttttat  | cctttgtccc  |
| 2581 | atcctgtagt  | ctacagaagt  | agttttttcc  | tctgcattac  | tatattcttc  | agtcggtaag  |
| 2641 | cccgttgctt  | ggaaaattat  | ttcaacagaa  | actcctgctt  | taattagatt  | ccttgccacc  |
| 2701 | tctattcttg  | ccacttttct  | actatgttcc  | ttgctagctt  | gtgcagatgt  | aattaatgaa  |
| 2761 | taaactacat  | tacgtaattc  | ttgattctca  | attttctcat  | acttttctac  | tagatctaata |
| 2821 | atctctttcc  | cctcattctc  | gagataactt  | tcttcatttg  | atattgtgtg  | ttcaggaata  |
| 2881 | agatctataa  | tgctaactga  | tagtgcttct  | gcgatgctat  | ataaccttct  | gattgaaatt  |
| 2941 | ttacgctttc  | ctttttcgta  | atggagtatt  | accaggtatt  | ttaccccgat  | tttctccgct  |
| 3001 | aaatcctttt  | gagtatatct  | cttcgtttagc | ctacaacttc  | ttactttctg  | tcctactttg  |
| 3061 | tagtctaaaa  | aattaggggt  | atcagcagtc  | actctttatc  | tataaaaaaca | aatattttata |
| 3121 | ttctatactg  | actccttaat  | aaccagaaga  | actatctcaa  | taaagatcat  | ttcaacaagc  |
| 3181 | ttaatctatc  | ttctttcaaa  | caatttctct  | atatcactca  | gtttcatttc  | tatataagtt  |
| 3241 | ggccttccat  | ggtcagaatg  | tggcgtttct  | tccatttgcc  | ttagcaactc  | attcatttct  |
| 3301 | tctaacctca  | ttttcctgcc  | tgctctaatt  | gatccatgac  | aagcgatagt  | tgccaatatt  |
| 3361 | ttgttcactt  | tatcttctac  | tggcaatgta  | tcttcttttt  | gtccatgcta  | acaggatata  |
| 3421 | gatttaacat  | aaaatttgct  | actgaaatgt  | tgacattaag  | tttcaagatc  | tttatcatgt  |
| 3481 | aaaggtgtgg  | gaaacctgtt  | ctcacgatgt  | taggtaaatc  | gtatttgagt  | ttttacgctc  |
| 3541 | gtatttttat  | taggctccca  | cacaaaaaag  | cgatatcttg  | atgtctccta  | cagctccaaa  |
| 3601 | tttatgacat  | ccatctcctg  | ggctttataag | gtgctttaca  | gcaggggttg  | taaaagatgt  |
| 3661 | acaaaagacg  | tctaaagtag  | aggatgctat  | tctaagatga  | tctctgacag  | ccgttttttt  |
| 3721 | atcaacgcat  | tcaaaactta  | aaaaaataaa  | aaacttgaac  | atttcttcag  | aattgtgtat  |
| 3781 | aattattaat  | gcttttttagg | ttgatttctt  | atgacttttt  | ctaagtttct  | tgatcccaaa  |

|      |             |             |             |             |             |             |
|------|-------------|-------------|-------------|-------------|-------------|-------------|
| 3841 | aatgatgtat  | cgtttaagcg  | tatcttcggt  | actgaaaaaa  | ataaagatat  | ccttattcac  |
| 3901 | ttcctcaatg  | atattcttgg  | ctttactggg  | aaaaatgaaa  | taaaggatat  | agagttttta  |
| 3961 | agtactattc  | aagaccctga  | tatcgccgct  | aaaaagcaaa  | gtattgttga  | tggtctctgt  |
| 4021 | agagattcta  | caggtgctca  | atacatttgc  | gagatgcagg  | tcgctaaaaa  | taaaggcttt  |
| 4081 | gaaaaacgtg  | cccaatacta  | tgcagctaaa  | gcttattcaa  | gacaagctga  | taagggcgat  |
| 4141 | caataccata  | accttaagga  | aattatcttt  | attgctatag  | cagattgtgt  | actgtttcct  |
| 4201 | aataaatctg  | agtacaaatc  | aaagcatact  | attcgagatg  | aagacactaa  | tgagcatgat  |
| 4261 | ctaaaagatt  | tctattttat  | atttattgag  | ttgccaaaaa  | ttccaaagaa  | caaggaagat  |
| 4321 | cagttggaaa  | atatagttga  | aaaatggggt  | tatttttttc  | gatatgcaga  | tgagactagt  |
| 4381 | gaagaagagc  | tggaaaaaat  | aataggtagt  | gatgtaataa  | ttaaaaaggc  | ctatgaagaa  |
| 4441 | ctaaatagat  | ttaactggtc  | agaaaaagaa  | tttattgcct  | atgaacagga  | aataaaacgt  |
| 4501 | attcttgatg  | aacaggctgt  | cctcgctcaa  | aaacttgatg  | atgctactga  | aaaaggtaga  |
| 4561 | gaagaaggta  | gacaagaagg  | catcctaata  | ggcgaagaaa  | aaggtgaaat  | gaaagctaaa  |
| 4621 | atagcagtgg  | ctaaaaacct  | acttaaagct  | ggcgtatctg  | tcgacttaata | agctgaatct  |
| 4681 | actggccttt  | ctcaagctga  | aatagagcaa  | cttcaggaag  | aatcagctaa  | cagatctttg  |
| 4741 | tagctgcttg  | tctgctgttg  | gatcatttaa  | ataagtttga  | ggttcattgc  | ctactttttc  |
| 4801 | tggttaactga | ctctttgatc  | gactagcgct  | agtaagagaa  | acagcagcaa  | gtatgcaatt  |
| 4861 | aattgttcct  | ttagccaact  | ctaataaaga  | ttgttttggc  | ctgcgtgttt  | gctctgcttc  |
| 4921 | ttcaatttca  | cgttttgaac  | ccatgaaagg  | aattgctttg  | gttgcttgta  | ttatctcttt  |
| 4981 | cacattctcg  | ctatctttta  | agtgatcaag  | atattctcta  | gctgtcatac  | taacttctct  |
| 5041 | tttatctagg  | tgatcttgga  | atttttcgct  | acttaaattc  | atttcagcat  | taataagtaa  |
| 5101 | cggtaacacta | ccttctacgt  | taattttggg  | tccaaagtca  | tataactgca  | ctctagataa  |
| 5161 | ttcttgacca  | ttaatcttaa  | tgagaccaag  | ctcatcatct  | tgctctgcca  | gaagctgggtg |
| 5221 | ttctgttttg  | atttcttttg  | ctaaaatttg  | cctatcttta  | tcggataatt  | ggctgttggc  |
| 5281 | tttatcaaca  | tcaaagtgtt  | caacaagaaa  | acctttttct  | cctactttat  | agccagcaga  |
| 5341 | ttctactgct  | ttctctacaa  | ttttcataag  | ctgatcaaca  | ttttttaact  | cagaaacaaa  |
| 5401 | cactacattg  | ctatcaaaat  | aagcataatt  | atcaccaatt  | ctgtaaatag  | caacaacatg  |
| 5461 | attgcttgta  | accagatgga  | tggcaaaatc  | gccttcaatt  | tcagctatat  | gatttgataa  |
| 5521 | atcactgaac  | gctttacggt  | cttttttggg  | gttaagaatt  | aagcttgaag  | gtatactact  |
| 5581 | tgtagcagaa  | tctagtgtcc  | tttcaaaatt  | agaaagcaat  | ttactaaaag  | caaaaacttc  |
| 5641 | tctttcttcc  | ctcttagata  | tttgcttacc  | ctgcgctata  | cgttcataaa  | tttcagatga  |
| 5701 | agctttttaag | ttacttaaaa  | atgactcatt  | actctgtgaa  | aataaaagctt | gggataagct  |
| 5761 | gcgtgtaatt  | gatacacact  | taccatcaat  | cttaactcca  | cgtttctcaa  | atggaggcaa  |
| 5821 | ataaagccct  | tgttttactg  | gtgcaatggg  | atacaaatcg  | cgaaaacact  | tcttggtggt  |
| 5881 | ctctattaaa  | gtgcaatgac  | tgtaattgct  | caacactcaa  | aatggagcta  | tgcctagcaa  |
| 5941 | ttcccattat  | aaaatcttct  | gttggtgaaa  | taagagaacc  | tgcatctcta  | gccttttcat  |
| 6001 | caaaaacaac  | tcccacaaaa  | gctactgtat  | taccgtctgt  | aagtgtttta  | catgtgacgc  |
| 6061 | actctttata  | cattttctatc | tgcttaactg  | cctcttgctt  | taatctctga  | actgtcacat  |
| 6121 | ttttccttgg  | tccttttaatc | tctaacccta  | ctggagcata  | ctcttttagca | ctgccagctt  |
| 6181 | ggtctgcaaa  | cttaataacca | tgaactagca  | tatcaatacg  | ttttcctctc  | cctgtctgaa  |
| 6241 | actctgttaa  | tattaatgct  | ctatcttctt  | cttgccggctc | tcctagcctt  | atgtcactat  |
| 6301 | agtggctaaa  | tgttccattg  | agtacagctt  | gtgtgtgtgc  | ttctttttct  | attaaaactt  |
| 6361 | taaaaggcag  | taccgcctca  | cctaattttt  | taaataatcc  | cttatatttg  | tctattgatt  |
| 6421 | gagatgaaga  | ttgatcttgt  | gaagaagcaa  | gctgagactc  | tagagcttca  | tcaaatacct  |
| 6481 | cttttaacct  | atcaggataa  | gggatattct  | caaaatcacc  | ttgaaactta  | tcaggcattc  |
| 6541 | cactggtgta  | ctgtgctaga  | ggaatagggtg | ctctaatactc | catactaaaa  | tattcttcaa  |
| 6601 | atttttcctt  | ttgtttatta  | acgtttaaagt | taagggtttag | ttcaaccact  | cttctatctc  |
| 6661 | ctatctcttg  | cctgagttta  | tcaagaggaa  | tccccttggt  | tatcacatta  | tctcttccat  |
| 6721 | ctgtttcaac  | aatattcatt  | acacaaaactg | atttttgagc  | agatttttgaa | actaagacta  |
| 6781 | ttgttacaac  | tccgtgactc  | tgatccaacc  | tagatgggtg  | accggcacct  | tgccctttac  |
| 6841 | ttttctgata  | tttaagacgt  | tgagattgag  | gttcagattg  | agcttctgtg  | ggatatattt  |
| 6901 | ctccataaat  | aaaaacgtgc  | tttttaaaat  | tgcttttctaa | aacttcaact  | tcgttttagta |
| 6961 | acagggactg  | ccctaacaaa  | aatctactaa  | aataatgatt  | atctcccttt  | tctcctgtac  |
| 7021 | caggaaatgt  | gtgatagata  | cgctttatgt  | tattctgaac  | tttctttttc  | agccctctct  |
| 7081 | cattaactct  | accgttatth  | cttccatcaa  | tagatatcaa  | tatttccatta | aaaagaggag  |
| 7141 | taatttcttg  | atcacgtgat  | ttagcaacga  | tatctgaaat  | aggagatgga  | tggtcgagat  |
| 7201 | ttacaccaac  | acatagaata  | ttttctgcag  | tagttaaaac  | tctcattacg  | ttcggttgaa  |
| 7261 | aaccttttgt  | ataatcttca  | gcttgcttta  | aagcagcaga  | tggtgtagtt  | ttactgttag  |
| 7321 | cctttatttt  | actccctttc  | ttccttaatt  | gttctagctc  | ctcttttagta | acagctttca  |
| 7381 | cttctataac  | aataggaata  | gaattcaatg  | atctatcctt  | accacgaggc  | actaaaacaa  |

```

7441 tatcagcata acctcttcct gcaaactgct ccaagtaaac cctgagatta tgtctatagc
7501 ggaaattttac taaagcacct gctataaacc catgatgtgc tgcttcccgt gctccttcag
7561 cataactaag tgaatcctta tattttgaat ggaagttgct gactttcttg agaactctct
7621 tcagagattt tttaacttct tctatgtcag aattagttaa cttagctata tcattttctg
7681 gattcagcca taattcgcgt tttatttctt gaaagttatc ctttaaagca cgatcttcat
7741 gcaatttttt atcttccact gcaacaagta ctccttggtg attaacatta cctttatcaa
7801 ttgttactga tttaactctt aattcgccca gattgtcaaa aacagattga aatcgtgcag
7861 gctgagatct tcctaatagca ccactcaatt caccataact gaacttttga gttgcagaag
7921 gggcaccttt ctctgagatt acaaataacc ttatcttatc tatcgcatct cctctacctt
7981 taatgtcacc ttctcttata atagccacct ttaaagtttt tggaccatca aaacagaaat
8041 atactttttc aatatctagc tttgttgcaa tttctgtgtc taccaaagta gaaaagcttc
8101 ctaaaaagaa atgaggaaaa aaacctcctt tatttaccga atgtaaatac gatggaattt
8161 ggtcaatata tgatagaaac cttgctttga aagattttaa ctcactactt gggttgagtg
8221 gatgttcggc agcactagca cctataactg aacctgcttc cttaatcaat aactctatta
8281 actcaaaatc ttgtggtctt tcttcgtttg gcataaatcc cccgttaata tataaatctt
8341 ttatctattc aatcctagac tgaccatgcg gtttttcaac tttcgcttca gttaaattac
8401 tacttggacc ggggtacatcc tcccgataag gctccttatc agtaaactta ttacaatagg
8461 ctgaaaatct atctagagaa gcactatctc cctgcattgc taatatagaa tgtatataat
8521 taacttgctt caccctttga tcagaactta gttcatttag tactgcccac actgccttca
8581 tgcagccctt tttcgcccaa tgtactaata gatttctatc aaaaaaggtg gatggatcta
8641 ttacctctc tacctcttct tttattacaa aagcacgatg acggccaaat ccctctttca
8701 tccacatgtg tataaaaagg ttctcagctg catctacata atgtccagaa tagttttgta
8761 tttctataga gcataaacgg gtatgataac aatcttctga aatatcactt ggctttaagc
8821 aatcaaaciaa ttctgaaat ttatcaaaac taagcacgtc ttttattctg ttcaaagaac
8881 cataatgacc atttttctct aaatcccttt taaaagctc tagataccta tcagtgttta
8941 tctgatcaaa gaaaaactca aatatatcag gataaatgcg aaaattaggt cctgctgaat
9001 aactgcatt tttcatcaag atctcatcct tcttttgtgc actcatctca ttctcaggta
9061 aagattttat tttactccaa aagaattcca ctgcttctac tcttcgcca cctactgcac
9121 aatcaagccc atactcatat ggatgacgac ccctcaaatc caacttatca agatacccac
9181 taatgaaatg tgaccaaaac tgtgctatag gaccttctcc acagcaccta actaagtgat
9241 gatattcaag caaactttca ttaccttgag cagacaattc ctcttttctt tcctcaaata
9301 tagctcgtat ttcaccctct aaacaacact cacaggaaat cttgtatcta cttgccctac
9361 taaaagaatt atctgaatct ggtacagcaa actttctacc taccttccgt ctattaagct
9421 tgactccatg caatcctcct acttccctcc atgattcctt atcagataac acttgtgcaa
9481 gaagattgtg ccctttttga ccacttctt

```

//

```

LOCUS      JAQZAU010000114      800 bp      dna      linear      ENV 17-MAR-2023
DEFINITION MAG: Wolbachia pipientis isolate wEsol contig_55246, whole genome
            shotgun sequence.
ACCESSION  JAQZAU010000114  JAQZAU010000000
VERSION    JAQZAU010000114.1
DBLINK     BioProject: PRJNA929258
            BioSample: SAMN33142973
KEYWORDS   WGS; ENV; Metagenome Assembled Genome; MAG.
SOURCE     Wolbachia pipientis (insect metagenome)
ORGANISM   Wolbachia pipientis
            Bacteria; Pseudomonadota; Alphaproteobacteria; Rickettsiales;
            Anaplasmataceae; Wolbachieae; Wolbachia.
REFERENCE  1 (bases 1 to 800)
AUTHORS    Fiutek,N., Couger,B.M., Roy,S., de la Torre,J.R. and Connor,E.F.
TITLE      Genomic assessment of the contribution of the Wolbachia
            endosymbiont of Eurosta solidaginis to gall-induction
JOURNAL    International Journal Molecular Sciences
REFERENCE  2 (bases 1 to 800)
AUTHORS    Fiutek,N., Couger,B.M., Roy,S., de la Torre,J.R. and Connor,E.F.
TITLE      Direct Submission
JOURNAL    Submitted (10-FEB-2023) Biology, San Francisco State University,
            1600 Holloway Ave, San Francisco, CA 94132, USA
COMMENT    ##Genome-Assembly-Data-START##
            Assembly Date      :: JUN-2019

```

Assembly Method :: FLYE v. 06-2019  
Genome Representation :: Full  
Expected Final Version :: Yes  
Genome Coverage :: 100.0x  
Sequencing Technology :: Illumina HiSeq; PacBio Sequel  
##Genome-Assembly-Data-END##

FEATURES  
Location/Qualifiers  
source 1..800  
/organism="Wolbachia pipientis"  
/mol\_type="genomic DNA"  
/submitter\_seqid="contig\_55246"  
/isolate="wEsol"  
/isolation\_source="galls on Solidago altissima"  
/host="Eurosta solidaginis MN-2018-EFC"  
/db\_xref="taxon:955"  
/environmental\_sample  
/country="USA: Cowling Arboretum, Carleton College,  
Northfield, MN"  
/lat\_lon="44.48 N 93.13 W"  
/altitude="280 m"  
/collection\_date="2018-11"  
/metagenome\_source="insect metagenome"  
/note="metagenomic"  
gene complement(<1..366)  
/locus\_tag="wEsol\_01352"  
CDS complement(<1..366)  
/locus\_tag="wEsol\_01352"  
/codon\_start=1  
/transl\_table=11  
/product="hypothetical protein"  
/pfam="Pfam-B\_19625"  
/translation="MSILTQSGRAAIAASIKEQSLHLAWGSGDGSSGSSHKVEKTFVK  
GEIKLDHQPVKDVKVVTGQTMHQPSVDYTVDSSTGVIKRTENSSIPVSDKVTIEYIQS  
TPPEPINSIKLLNELGRRTA"  
/besthit="qcoverage 100 , hcoverage 53.7444933920705 ,  
similarity 95.1 , identity 91.0 , evaluate 1.31e-68 ,  
alnlength 122 , Bacteria , Proteobacteria ,  
WP\_010082176.1 MULTISPECIES: hypothetical protein  
[Wolbachia]"  
gene complement(457..>800)  
/locus\_tag="wEsol\_01353"  
CDS complement(457..>800)  
/locus\_tag="wEsol\_01353"  
/codon\_start=1  
/transl\_table=11  
/product="hypothetical protein"  
/translation="LLEDITERLRIKNMNEKDSKQHLITAITRAAISGHPFTHTGSTG  
VYKQRHRLPEEFHSIGRDRMERIVQELLQARKLVKGMATGSKEDKWLDIPSGPFARGV  
GKFSCGAELFS"  
/besthit="qcoverage 100 , hcoverage 28.9002557544757 ,  
similarity 100 , identity 100 , evaluate 3.47e-71 ,  
alnlength 113 , Bacteria , Proteobacteria ,  
WP\_108784543.1 AAA family ATPase [Wolbachia endosymbiont  
of Bemisia tabaci]"

ORIGIN

1 tgcagtagct ctgccaagtt cattcaagag ctttatagaa tttatagggt caggtggtgt  
61 gctttgaatg tactctatgg taactttatc acttactgga atagagctat tttccgtacg  
121 tttaattaca ccagtactgc tatcaactgt atagtcaaca cttggctgat gcattgtttg  
181 tcctgtaaca accttcacat ctttaacagg ttgatgatca agttttatct cacccttaac  
241 gaaagttttt tctactttat ggctacttcc agagcttcca tcaccacttc cccaggcaag

```

301 atgtagagac tgctctttta tacttgctgc tattgctgct cttcctgact gtgtgagaat
361 tgacattttt aattaagtct cctatattat atatgtacga tgacttcaaa attcgtccgc
421 aaaaatcaaa atattttttt atatcagaaa aatttttttag gagaatagct cagctccaca
481 gctaaacttt ccaacaccgc gagcaaattg tccgctagga atgtcaagcc atttatcttc
541 ttttgaacca gtagccattc ccttaaccag cttccgtgct tgtaacagct cttgaactat
601 acgctccatt ctatctcttc ctatactgtg aaactcctca ggtagtctat gccgctgttt
661 atacactcct gtacttcctg tatgggtaaa tggatgtcca gaaattgctg ctcgtgtaat
721 tgcagttata agatgctgct ttgaatcttt ttcgttcata ttttttattc ttaatctttc
781 agttatgtct tctaacaatc

```

//

```

LOCUS      JAQZAU010000115          6957 bp    dna        linear    ENV 17-MAR-2023
DEFINITION MAG: Wolbachia pipientis isolate wEsol contig_55544, whole genome
            shotgun sequence.
ACCESSION  JAQZAU010000115  JAQZAU010000000
VERSION    JAQZAU010000115.1
DBLINK     BioProject: PRJNA929258
            BioSample: SAMN33142973
KEYWORDS   WGS; ENV; Metagenome Assembled Genome; MAG.
SOURCE     Wolbachia pipientis (insect metagenome)
ORGANISM   Wolbachia pipientis
            Bacteria; Pseudomonadota; Alphaproteobacteria; Rickettsiales;
            Anaplasmataceae; Wolbachieae; Wolbachia.
REFERENCE  1  (bases 1 to 6957)
AUTHORS    Fiutek,N., Couger,B.M., Roy,S., de la Torre,J.R. and Connor,E.F.
TITLE      Genomic assessment of the contribution of the Wolbachia
            endosymbiont of Eurosta solidaginis to gall-induction
JOURNAL    International Journal Molecular Sciences
REFERENCE  2  (bases 1 to 6957)
AUTHORS    Fiutek,N., Couger,B.M., Roy,S., de la Torre,J.R. and Connor,E.F.
TITLE      Direct Submission
JOURNAL    Submitted (10-FEB-2023) Biology, San Francisco State University,
            1600 Holloway Ave, San Francisco, CA 94132, USA
COMMENT    ##Genome-Assembly-Data-START##
            Assembly Date      :: JUN-2019
            Assembly Method    :: FLYE v. 06-2019
            Genome Representation :: Full
            Expected Final Version :: Yes
            Genome Coverage    :: 100.0x
            Sequencing Technology :: Illumina HiSeq; PacBio Sequel
            ##Genome-Assembly-Data-END##
FEATURES   Location/Qualifiers
            source              1..6957
                                /organism="Wolbachia pipientis"
                                /mol_type="genomic DNA"
                                /submitter_seqid="contig_55544"
                                /isolate="wEsol"
                                /isolation_source="galls on Solidago altissima"
                                /host="Eurosta solidaginis MN-2018-EFC"
                                /db_xref="taxon:955"
                                /environmental_sample
                                /country="USA: Cowling Arboretum, Carleton College,
                                Northfield, MN"
                                /lat_lon="44.48 N 93.13 W"
                                /altitude="280 m"
                                /collection_date="2018-11"
                                /metagenome_source="insect metagenome"
                                /note="metagenomic"
            gene                200..547
                                /locus_tag="wEsol_01354"
            CDS                  200..547

```

```

/locus_tag="wEsol_01354"
/codon_start=1
/transl_table=11
/fullproduct="qcoverage 100 , hcoverage 100 , similarity
100 , identity 100 , evalue 2.74e-74 , alnlength 115 ,
Bacteria;Eukaryota , Proteobacteria;Arthropoda ,
WP_155968342.1 MULTISPECIES: IS630 transposase-related
protein [Wolbachia]"
/cog="COG3415 COG3415 138 Transposase and inactivated
derivatives"
/pfam="HTH_Tnp_IS630 HTH_Tnp_1 HTH_23 HTH_28 HTH_29 HTH_7
CENP-B_N Pfam-B_14738 HTH_8 HTH_17 HTH_24 Pfam-B_2106"
/product="IS630
transposase-related protein"
/translation="MAYSVDLRERAVSMIEKGKSKVEVAELLEIGIATLYRWLRKKAA
GESLRPSKNGSFIRKIDPKILEEYVKKNPDHTLAEMKQNLGFGINSIWYRLKQLRITL
KKSYSITISRAQSRR"
/besthit="qcoverage 100 , hcoverage 100 , similarity 100
, identity 100 , evalue 2.74e-74 , alnlength 115 ,
Bacteria;Eukaryota , Proteobacteria;Arthropoda ,
WP_155968342.1 MULTISPECIES: IS630 transposase-related
protein [Wolbachia]"
gene 747..1058
/locus_tag="wEsol_01355"
CDS 747..1058
/locus_tag="wEsol_01355"
/codon_start=1
/transl_table=11
/fullproduct="qcoverage 100 , hcoverage 100 , similarity
100 , identity 100 , evalue 1.60e-74 , alnlength 103 ,
Bacteria , Proteobacteria , WP_155968470.1 transposase
[Wolbachia pipientis]"
/cog="COG3335 COG3335 132 Transposase and inactivated
derivatives"
/pfam="DDE_3 DDE_1"
/product="transposase"
/translation="MTFKGGCDKEVFNTWLEKMLLPKLPHGTTIVMDNATFHKTPKTK
ELIDNARCRLLYLPTYSPDLNPIEHCWNTIKSRLRPLMHKYTDLQLLVGNTIMEIYHS
F"
/besthit="qcoverage 100 , hcoverage 100 , similarity 100
, identity 100 , evalue 1.60e-74 , alnlength 103 ,
Bacteria , Proteobacteria , WP_155968470.1 transposase
[Wolbachia pipientis]"
gene 1151..1627
/locus_tag="wEsol_01356"
CDS 1151..1627
/locus_tag="wEsol_01356"
/codon_start=1
/transl_table=11
/fullproduct="qcoverage 100 , hcoverage 85.4054054054054
, similarity 100 , identity 99.4 , evalue 5.20e-101 ,
alnlength 158 , Bacteria , Proteobacteria , MBS9529803.1
hypothetical protein [Wolbachia endosymbiont of Ceratitis
capitata]"
/translation="MGSGVALEDEDVDDVVEVRVSTVIDLLSDYAKLEDNKEHRELLI
SKVADNLGLSTQDKTAPEVLMELGSLPSLTKGQVNHNVQSVVNTFIKLIIEGKSEVY
KKGGAIDAIHKEIDKAIVEQEKKATNKKDIENDKWTDRIKKQNYSAESHEHLP"
/product="hypothetical protein"
/besthit="qcoverage 100 , hcoverage 85.4054054054054 ,
similarity 100 , identity 99.4 , evalue 5.20e-101 ,

```

```

alnlength 158 , Bacteria , Proteobacteria , MBS9529803.1
hypothetical protein [Wolbachia endosymbiont of Ceratitis
capitata]"
gene      complement(1679..2095)
          /locus_tag="wEsol_01357"
CDS       complement(1679..2095)
          /locus_tag="wEsol_01357"
          /codon_start=1
          /transl_table=11
          /pfam="Acetyltransf_3 Acetyltransf_4 Acetyltransf_10
Acetyltransf_7 Acetyltransf_1 Pfam-B_745 FR47
Acetyltransf_13 Acetyltransf_9"
          /fullproduct="qcoverage 100 , hcoverage 100 , similarity
100 , identity 100 , evalue 2.95e-98 , alnlength 138 ,
Bacteria , Proteobacteria , WP_083250453.1 MULTISPECIES:
GNAT family N-acetyltransferase [Wolbachia]"
          /translation="MKIEHTTSPSSKDIEFLLKKINEETVDKGTCPNPFPAFFIRDDTEQ
IIVGCSGFVIYGSIIYTDLLWVHSDYRRKGMGKQLMEEVHDYGREMHCKIATVATMNFQ
KAKVFYEKLGKCDLVRPGYVNMYIFEESVVRCTVK"
          /product="GNAT family
N-acetyltransferase"
          /besthit="qcoverage 100 , hcoverage 100 , similarity 100
, identity 100 , evalue 2.95e-98 , alnlength 138 ,
Bacteria , Proteobacteria , WP_083250453.1 MULTISPECIES:
GNAT family N-acetyltransferase [Wolbachia]"
gene      complement(2104..2814)
          /locus_tag="wEsol_01358"
CDS       complement(2104..2814)
          /locus_tag="wEsol_01358"
          /codon_start=1
          /transl_table=11
          /fullproduct="qcoverage 100 , hcoverage 100 , similarity
100 , identity 100 , evalue 2.60e-165 , alnlength 236 ,
Bacteria , Proteobacteria , WP_010962525.1 MULTISPECIES:
heme ABC transporter permease CcmC [Wolbachia]"
          /cog="CcmC COG0755 281 ABC-type transport system involved
in cytochrome c biogenesis, permease component"
          /pfam="Cytochrom_C_asm"
          /tigr="TIGR01191 ccmC 184 heme exporter protein CcmC"
          /product="heme ABC
transporter permease CcmC"
          /translation="MFLKPTNFSYFSKKALPWLGVICFACFLIGMSLALFFSPEDYK
QGEIVRIMYIHVPSAWLALGIYGLIASLGFISLVWNNSIASVLAHAAAPAGTVFSAIC
LITGSIWGKGTWGTWWVWDARLTSMILIFFLYVGYSLSLWSAFDNEARA EKSAVFAIF
SAINIPIVKFSVNLWSTLHQPASILRKGGIAIESSLLLPLVAMFMFCATFFLVVWILY
SLYLINLYKIKREISMRY"
          /besthit="qcoverage 100 , hcoverage 100 , similarity 100
, identity 100 , evalue 2.60e-165 , alnlength 236 ,
Bacteria , Proteobacteria , WP_010962525.1 MULTISPECIES:
heme ABC transporter permease CcmC [Wolbachia]"
gene      2950..3780
          /locus_tag="wEsol_01359"
CDS       2950..3780
          /locus_tag="wEsol_01359"
          /codon_start=1
          /transl_table=11
          /fullproduct="qcoverage 100 , hcoverage 100 , similarity
100 , identity 100 , evalue 1.69e-190 , alnlength 276 ,
Bacteria , Proteobacteria , WP_006280267.1 MULTISPECIES:
kinase/pyrophosphorylase [Wolbachia]"

```

```

/cog="COG1806 COG1806 273 Uncharacterized protein
conserved in bacteria"
/pfam="Kinase-PPase"
/product="
kinase/pyrophosphorylase"
/translation="MTLKKLNLHLVSDSSGETVISVAKSALKHFRSVETIEYVWSFVK
GEEQIDKILEEINRKSDEHNFVICTITDDELRKYLKDNCIKLKIPYRAILSHIIREIS
SYLEIEKDEKLDLHTEINNEYFQRIEAINYTINHDDGQNIQDIDKADIILVGVSRTSK
SPTSTYLAYRGYKVANIPFVSGVPPFYVDLAKLKNKLTIGVTIDVSRLEIRKNRLTSI
NNEDNNIYANPEKVEKEIKEAEELFKQNNWPIIDVTQKSIEEVSATIIQYFNKMLSID
"
/besthit="qcoverage 100 , hcoverage 100 , similarity 100
, identity 100 , evalue 1.69e-190 , alnlength 276 ,
Bacteria , Proteobacteria , WP_006280267.1 MULTISPECIES:
kinase/pyrophosphorylase [Wolbachia]"
gene 3830..3958
/locus_tag="wEsol_01360"
CDS 3830..3958
/locus_tag="wEsol_01360"
/codon_start=1
/transl_table=11
/fullproduct="qcoverage 100 , hcoverage 100 , similarity
100 , identity 100 , evalue 4.05e-21 , alnlength 42 ,
Bacteria , Proteobacteria , WP_006279631.1 MULTISPECIES:
type B 50S ribosomal protein L36 [Wolbachia]"
/cog="RpmJ COG0257 38 Ribosomal protein L36"
/pfam="Ribosomal_L36"
/tigr="TIGR01022 rpmJ_bact 37 ribosomal protein L36"
/product="type B 50S
ribosomal protein L36"
/translation="MKVKGSLKSHNRDNCKVVKRGGKIYIINKVKPRCKARQGS"
/besthit="qcoverage 100 , hcoverage 100 , similarity 100
, identity 100 , evalue 4.05e-21 , alnlength 42 ,
Bacteria , Proteobacteria , WP_006279631.1 MULTISPECIES:
type B 50S ribosomal protein L36 [Wolbachia]"
gene 4008..4322
/locus_tag="wEsol_01361"
CDS 4008..4322
/locus_tag="wEsol_01361"
/codon_start=1
/transl_table=11
/fullproduct="qcoverage 100 , hcoverage 100 , similarity
100 , identity 99.0 , evalue 1.55e-59 , alnlength 104 ,
Bacteria , Proteobacteria , WP_010962526.1 MULTISPECIES:
septum formation initiator family protein [Wolbachia]"
/cog="COG2919 COG2919 117 Septum formation initiator"
/pfam="DivIC"
/product="septum formation
initiator family protein"
/translation="MLISKKKQKLLCLSAALLISLTLYFSISTITGKRGLLTLDLK
KEIEYNKLLLDVSSSEKEKLDNKIFGLYEKSLDLLLDEQAKNALGYVNPNELMVVDL
VE"
/besthit="qcoverage 100 , hcoverage 100 , similarity 100
, identity 99.0 , evalue 1.55e-59 , alnlength 104 ,
Bacteria , Proteobacteria , WP_010962526.1 MULTISPECIES:
septum formation initiator family protein [Wolbachia]"
gene 4402..4704
/locus_tag="wEsol_01362"
CDS 4402..4704
/locus_tag="wEsol_01362"

```

```

/codon_start=1
/transl_table=11
/fullproduct="qcoverage 100 , hcoverage 100 , similarity
100 , identity 100 , evalue 7.23e-63 , alnlength 100 ,
Bacteria , Proteobacteria , WP_213863658.1 transposase
[Wolbachia endosymbiont of Ceratitidis capitata]"
/cog="COG2963 COG2963 116 Transposase and inactivated
derivatives"
/pfam="HTH_Tnp_1 HTH_23 HTH_28"
/product="transposase"
/translation="MVREYTAEFKLEAVKLANEQRKVGQPVAKVARDLGIRDSVLGKW
IKKHNEKKSAADAFPGRGNMAPYDKERFDLQSKSNKGKRHLKKSPGQSKRVKYFFI"
/besthit="qcoverage 100 , hcoverage 100 , similarity 100
, identity 100 , evalue 7.23e-63 , alnlength 100 ,
Bacteria , Proteobacteria , WP_213863658.1 transposase
[Wolbachia endosymbiont of Ceratitidis capitata]"
gene 4926..5144
/locus_tag="wEsol_01363"
CDS 4926..5144
/locus_tag="wEsol_01363"
/codon_start=1
/transl_table=11
/fullproduct="qcoverage 90.2777777777778 , hcoverage
80.2469135802469 , similarity 100 , identity 100 , evalue
1.14e-39 , alnlength 65 , Bacteria , Proteobacteria ,
WP_220468353.1 transposase [Wolbachia pipientis]"
/translation="MQKNDIRAILKRKFKIKKQQTNDRAVAPNILDQNFIVDQPNKVV
DYLHQNQGGMAIFGSNNSHVWYSTSQSK"
/product="transposase"
/besthit="qcoverage 90.2777777777778 , hcoverage
80.2469135802469 , similarity 100 , identity 100 , evalue
1.14e-39 , alnlength 65 , Bacteria , Proteobacteria ,
WP_220468353.1 transposase [Wolbachia pipientis]"
gene 5174..5521
/locus_tag="wEsol_01364"
CDS 5174..5521
/locus_tag="wEsol_01364"
/codon_start=1
/transl_table=11
/fullproduct="qcoverage 100 , hcoverage 100 , similarity
100 , identity 100 , evalue 2.74e-74 , alnlength 115 ,
Bacteria;Eukaryota , Proteobacteria;Arthropoda ,
WP_155968342.1 MULTISPECIES: IS630 transposase-related
protein [Wolbachia]"
/cog="COG3415 COG3415 138 Transposase and inactivated
derivatives"
/pfam="HTH_Tnp_IS630 HTH_Tnp_1 HTH_23 HTH_28 HTH_29 HTH_7
CENP-B_N Pfam-B_14738 HTH_8 HTH_17 HTH_24 Pfam-B_2106"
/product="IS630
transposase-related protein"
/translation="MAYSVDLRERAVSMIEKGKSKVEVAELLEIGIATLYRWLRKKAA
GESLRPSKNGSFIRKIDPKILEEYVKKNPDHTLAEMQNGLGFGINSIWYRLKQLRITL
KKSYSISRASRR"
/besthit="qcoverage 100 , hcoverage 100 , similarity 100
, identity 100 , evalue 2.74e-74 , alnlength 115 ,
Bacteria;Eukaryota , Proteobacteria;Arthropoda ,
WP_155968342.1 MULTISPECIES: IS630 transposase-related
protein [Wolbachia]"
gene 5721..6032
/locus_tag="wEsol_01365"

```

CDS 5721..6032  
 /locus\_tag="wEsol\_01365"  
 /codon\_start=1  
 /transl\_table=11  
 /fullproduct="qcoverage 100 , hcoverage 100 , similarity 100 , identity 100 , evalue 1.60e-74 , alnlength 103 , Bacteria , Proteobacteria , WP\_155968470.1 transposase [Wolbachia pipientis]"  
 /cog="COG3335 COG3335 132 Transposase and inactivated derivatives"  
 /pfam="DDE\_3 DDE\_1"  
 /product="transposase"  
 /translation="MTFKGGCDKEVFNTWLEKMLLPKLPHGTTIVMDNATFHKTPKTK ELIDNARCRLLYLPTYSPDLNPIEHCWNTIKSRLRPLMHKYTDLQLLVGNTIMEIYHS F"  
 /besthit="qcoverage 100 , hcoverage 100 , similarity 100 , identity 100 , evalue 1.60e-74 , alnlength 103 , Bacteria , Proteobacteria , WP\_155968470.1 transposase [Wolbachia pipientis]"

gene complement(6069..6410)  
 /locus\_tag="wEsol\_01366"

CDS complement(6069..6410)  
 /locus\_tag="wEsol\_01366"  
 /codon\_start=1  
 /transl\_table=11  
 /fullproduct="qcoverage 100 , hcoverage 100 , similarity 100 , identity 100 , evalue 1.53e-79 , alnlength 113 , Bacteria , Proteobacteria , AAS13810.1 transposase, IS5 family, OrfB [Wolbachia endosymbiont of Drosophila melanogaster]"  
 /cog="COG3293 COG3293 124 Transposase and inactivated derivatives"  
 /pfam="DDE\_Tnp\_1\_2 DDE\_Tnp\_1"  
 /product="transposase, IS5 family, OrfB"  
 /translation="MRTKYTKVKKMWADMGYQGRNLKNHIKEEYDIDIEIVKRPPCRF WVHKDTPPELLPTREQGFKVQPRRWVVERTFAWVNRNRRLSKEYDLLTTSTENFIYLA MSRVMLKREYA"  
 /besthit="qcoverage 100 , hcoverage 100 , similarity 100 , identity 100 , evalue 1.53e-79 , alnlength 113 , Bacteria , Proteobacteria , AAS13810.1 transposase, IS5 family, OrfB [Wolbachia endosymbiont of Drosophila melanogaster]"

gene complement(6521..6901)  
 /locus\_tag="wEsol\_01367"

CDS complement(6521..6901)  
 /locus\_tag="wEsol\_01367"  
 /codon\_start=1  
 /transl\_table=11  
 /fullproduct="qcoverage 100 , hcoverage 100 , similarity 100 , identity 100 , evalue 1.16e-87 , alnlength 126 , Bacteria , Proteobacteria , AOV87106.1 transposase [Wolbachia endosymbiont of Drosophila incompta]"  
 /cog="COG3293 COG3293 124 Transposase and inactivated derivatives"  
 /pfam="DUF4096"  
 /product="transposase"  
 /translation="MRKKYPTDLSEREWARIKHFVRSYKKGGRPPKYSKREILEAIF YVLRGTGCQWRYLPNDFPLWKTVYEQFRQWKKQGIFEKMNYEITKYSRRKIGRNEQPSA CIVDSQSVKTEKGGSKAMMEVKK"  
 /besthit="qcoverage 100 , hcoverage 100 , similarity 100

, identity 100 , evalue 1.16e-87 , alnlength 126 ,  
 Bacteria , Proteobacteria , AOV87106.1 transposase  
 [Wolbachia endosymbiont of Drosophila incompta]"

# ORIGIN

```

1  attacagcta ttaaagccca cttccgtcat tctatgcctt gatagaagcg gagctataaa
61  ttaaattgcaa aattcagtag tcataggatg caccatgagc taaaagcaat tccacaagct
121 cttggtgatt attattagct gcataatata gtacttccca aagtaaataa taaagggtata
181 ataagctatt tgagttataa tggcgtatag tgtggattta agggaaaggg cagtatcgat
241 gatagaaaaa gggaaagtcaa aggttgaggt ggcagagcct ttggagatag gaatagcaac
301 tctgtaccgc tggttaagaa agaaagccgc tggtgaaagc ctaaggccat cgaaaaacgg
361 cagcttttatt cgaaaaatag acccaaaaat actcgaagaa tatgttataa agaatccaga
421 tcatacgctg gcagagatga aacaaaatct tggatttgga ataaattcaa tttggtatag
481 gctgaaacag ctaagaatta ctttaaaaaa agtttact ataatcaagag cgcaatcaag
541 aagataggca gcgatttacc gataaaatct caaaaataga ccattccagc atcttatata
601 tagatgaagc aggagttgat aataggttat accgagagta tggacgtgct ccaataggaa
661 agaaaattta tgcagatatt ccaggaagaa aacgagagag aatcagtata ataggcgggt
721 ggattggaaa gagatttatt gcaccaatga ctttcaaagg tgggtgtgac aaagaggtat
781 tcaatacatg gttagagaag atgttattac ctaaattgcc acatgggtact acaatagtta
841 tggacaatgc cacattccat aaaactccca aaacaaagga gttaatagat aatgctagat
901 gccgtttgct ctatctacca acatattcac cagatttgaa ccctatagag cattgttgga
961 ataccatcaa aagccgcctc agacctttaa tgcataaata tacagactta caacttttgg
1021 ttggtaatat cataatggaa atttatcatt cattttagaa aatactatag atggtacaat
1081 atcaaccaca ggatcagatg caaatgaaga atttatcaat cttttaagcg aaaatctcag
1141 agagaggtta ttggggtcag gagttgctct agaagatgaa gatgttgatg atgttgttga
1201 agtcagagta tctaccgtta tagatctatt gagtgattat gctaaattgg aagataataa
1261 agaacacaga gagttattaa taagtaaagt agcagataat ttaggacttt ccactcaaga
1321 taaaacagca ccagaagtat tgatggaatt aggcctctta ccttctttga caaaaggtca
1381 ggtaaatcat aatcaagtgc agtctgttgt aaatactttt attaatgtaa ttattgaagg
1441 gaaaagcgaa gtatacaaaa aaggaggtgc gattaatgca attgatgcaa ttcataagga
1501 gatagataag gcaattgttg agcaagaaaa aaaagcaacc aacaaaaaag atatagaaaa
1561 tgataaatgg acagatagaa tcaaaaaaca gaattattct gcggaatcac atgaacattt
1621 accttaaaga tattagtagg ctcttttaaat attttagagt tcatggttac aacggttgct
1681 attttacagt gcatctcaca acactttctt caaaaatata catgttaaca taccctggac
1741 gtacaagatc acacttatac ccaagctttt cataaaaatac tttcgctttt tgaaaattca
1801 tggttgcaac gggttgctatt ttacagtgca tctcacgacc ataatacatga acttcttcca
1861 ttagctgctt tcccatacct tttcttctat aatcagagtg cacccaaagc aagtcagtgt
1921 aaattgaacc atagataaca aaaccgctac aacctacaat aatttgttca gtatcatcgc
1981 gaataaaaaa agcaaatggg ttacacgtac ctttatcaac ggtttcttca ttaatctttt
2041 tgagtaggaa ttcaatgtct ttgctacttg gtgatgtggg gtgttctatt ttcattcttc
2101 ggcctaatac cgcatactga tttctctctt tatcttatat aaattaatta agtaaagtga
2161 atacagtatc cacactacta aaaaaaatgt ggcacaaaac ataaacattg caaccagtgg
2221 caacagcagg gaactttcta ttgctattcc accttttctc aaaatgcttg ctggctgatg
2281 gagagtggac cataaattca cggaaaattt tactatagga atatttatag cactaaagat
2341 ggcaaatact gctgctgatt tttctgccct cgcttcatta tcaaaagcgc tccacaatga
2401 aaggtagcca acatatagga aaaataaaat cagcattgaa gtaagccttg catcccatac
2461 ccaccaagtg ccccaggttc cttttcccca gatgctgcct gtgattaagc atattgccga
2521 aaagactgtc cctgcaggag cagcagcatg tgccaagaca ctagcaatgc tattgttcca
2581 taccaatgaa atgaaaccaa gtgatgcaat taatccatat attccaagag caagccatgc
2641 agaaggcaca tgaatgtaca tgattcgtac aatttctcct tgtttataat cttctggaga
2701 gaagaataac gccaaagaca ttccaattaa aaaacatgcg aaacaaataa cccaagcca
2761 aggtagagct ttcttagaaa aataagagaa atttgtaggc ttttaataaaa acattcgttt
2821 tgagaataat tgtgttaaga atttaccaat tagtttgagt tttatcaaca ggatagtttt
2881 tctatattta cgtagggtcaa caaattagca taatttcagt agcagattgc tagctattat
2941 ttttagtata tgacccttaa aaagcttaat ctacacttag tatcagattc aagtgggtga
3001 actgtttatat cagttgcaaa atcagctctg aaacactttc gttctgtaga aacgatcgaa
3061 tatgttttgg cttttgtaaa aggagaagag cagattgaca aaattctgga ggaaattaat
3121 aggaaaagtg atgagcataa ttttgttata tgcactatta ctgatgatga gctaagaaaa
3181 tatctaaaag ataactgtat aaagttgaaa attccctata gagcaatatt atcacatatt
3241 attagagaaa tttcgtctta tcttgaaatt gaaaaagacg aaaagcttga cttgcatact
3301 gagataaata acgaatattt tcagcgcatt gaggcaataa actacactat taatcatgat

```

|      |             |             |             |             |             |             |
|------|-------------|-------------|-------------|-------------|-------------|-------------|
| 3361 | gatggacaaa  | atattcaaga  | tattgataaa  | gcagatataa  | ttttgggttg  | agtttcacgt  |
| 3421 | acatcaaaat  | ctcccaccag  | tacgtatttta | gcttaccgag  | gctataaagt  | tgcaaatatt  |
| 3481 | ccttttggtt  | gtggagtacc  | cttttatgtt  | gacttggcaa  | aattaaaaaa  | taaactaacg  |
| 3541 | ataggggtta  | caatagacgt  | aagtaggcta  | atagaaatac  | gcaaaaatag  | acttacttca  |
| 3601 | attaacaacg  | aagataataa  | tatatatgct  | aaccctgaga  | aagtagaaaa  | ggaaattaaa  |
| 3661 | gaagcagagg  | agctctttta  | acagaataac  | tggccaatta  | tcgatgtcac  | gcaaaagtcg  |
| 3721 | atcgaagaag  | tatcagcaac  | aattatacaa  | tattttaata  | aaatgttatc  | aattgactaa  |
| 3781 | ctcttgataa  | gtgattataa  | tgtaaagtaa  | tttaattctt  | actatagata  | tgaaagtcaa  |
| 3841 | agggtcgcta  | aaatctcatc  | gtaacagaga  | taaaaattgt  | aaagttgtga  | aaaggggtgg  |
| 3901 | taagattttac | attataaata  | aggtaaagcc  | aaggtgtaaa  | gcgcgtcaag  | gttcttagct  |
| 3961 | ttttgttcac  | cttttcatgt  | tatatatttt  | ttatatgtga  | aagtacgggtg | cttatatcta  |
| 4021 | aaaagaagca  | aaagttactg  | tgtttaagcg  | cagccttact  | catttcttcc  | cttacattat  |
| 4081 | atttcagcat  | tagcacaatt  | acaggtaaac  | gtggcttatt  | gacgttaatc  | gatttaaaaa  |
| 4141 | aagaaatcga  | gtacaataaa  | cttttgctaa  | aggatgtctc  | ttctgaaaag  | gaaaagttgg  |
| 4201 | acaacaaaat  | atttggctta  | tatgaaaaaa  | gcttagattt  | agatctgctt  | gatgagcaag  |
| 4261 | caaaaaatgc  | tttaggttat  | gtgaacccta  | atgaacttat  | ggttgttcct  | gacgtggaat  |
| 4321 | agcagtagtg  | accttaccga  | gaaaaagtg   | agagaaagaa  | aagagttttt  | ttgggtaaaa  |
| 4381 | taaaattttg  | gaggattaga  | aatggtaaga  | gaatatacag  | cagaattcaa  | attggaagct  |
| 4441 | gttaaactgg  | caaatgaaca  | aagaaaggta  | ggtcaaccag  | ttgcaaaagt  | agcaagagat  |
| 4501 | ctaggaataa  | gggatagtg   | attaggaaaa  | tggataaaga  | aacacaacga  | aaaaaagtcg  |
| 4561 | gcagcagatg  | catttccagg  | tagaggtaac  | atggctcctt  | acgacaaaga  | gaggtttgat  |
| 4621 | ttacaaagca  | agagtaacaa  | gggaaagaga  | catttaaaaa  | aaagccctgg  | ccagtcaaaa  |
| 4681 | agagtaaaat  | atttttttat  | atagtaactg  | ctataaagta  | caggaattat  | gtaggatttt  |
| 4741 | ctgctagtgg  | ctactataag  | tggaccacaa  | gaaaaataag  | cagtagagaa  | tcagcaaata  |
| 4801 | aagagttatt  | agcagatatt  | caaaaaatat  | atcaagcttc  | taaatgtaga  | tatggagctc  |
| 4861 | ctaaaattca  | tgctgaattg  | aaggcttttg  | gtaaaagttg  | caatttgaaa  | acggtgcaaa  |
| 4921 | gtattatgca  | gaaaaatgac  | atcagggtcta | tactgaaaag  | aaagttttaa  | attaaaaaac  |
| 4981 | aacaaacaga  | taatagagct  | gtagctccca  | atatactaga  | tcaaaacttt  | attggtgatc  |
| 5041 | aaccaaataa  | agtatgggat  | tacttacatc  | aaaaccaagg  | agggatgggt  | atatttggca  |
| 5101 | gcaataattc  | tcacgtatgg  | tatagtactt  | cccaaagtaa  | atgataaagg  | tataataagc  |
| 5161 | tatttgagtt  | ataatggcgt  | atagtgtgga  | tttaagggaa  | agggcagtat  | cgatgataga  |
| 5221 | aaaagggaag  | tcaaagggtg  | aggtggcaga  | gcttttggag  | ataggaatag  | caactctgta  |
| 5281 | ccgctgggtta | agaaagaaa   | ccgctgggtga | aagcctaagg  | ccatcgaaaa  | acggcagctt  |
| 5341 | tattcgaaaa  | atagacccaa  | aaataactcga | agaatatggt  | aaaaagaatc  | cagatcatac  |
| 5401 | gctggcagag  | atgaaacaaa  | atcttggatt  | tggataaaat  | tcaatttgggt | ataggctgaa  |
| 5461 | acagctaaga  | attactttta  | aaaaaagtta  | cactatatca  | agagcgcaat  | caagaagata  |
| 5521 | ggcagcgatt  | taccgataaa  | atctcaaaaa  | tagaccattc  | cagcatctta  | tatatagatg  |
| 5581 | aagcaggagt  | tgataaatag  | ttataaccgag | agtatggacg  | tgctccaata  | ggaaagaaaa  |
| 5641 | tttatgcaga  | tattccagga  | agaaaacgag  | agagaatcag  | tataataggc  | gggttgattg  |
| 5701 | gaaagagatt  | tattgcacca  | atgacttttc  | aaggtgggtg  | tgacaaagag  | gtattcaata  |
| 5761 | catgggttaga | gaagatgtta  | ttacctaaat  | tgccacatgg  | tactacaata  | gttatggaca  |
| 5821 | atgccacatt  | ccataaaaact | cccaaaaacaa | aggagttaat  | agataatgct  | agatgccgtt  |
| 5881 | tgctctatct  | accaacatat  | tcaccagatt  | tgaaccctat  | agagcattgt  | tggaaatacca |
| 5941 | tcaaaagccg  | cctcagacct  | ttaatgcata  | aatatacaga  | cttacaactt  | ttggttggtta |
| 6001 | ataccataat  | ggaaattttat | cattcattttt | agaaaatact  | ataagaggtt  | gtccggaaac  |
| 6061 | tagtaaatte  | aagcatattc  | cctcttttaac | ataaccctac  | tcatagctag  | gtatatgaaa  |
| 6121 | ttctcagtgg  | atggttgtag  | taaatcatac  | tccttcgata  | gccttctatt  | cctattaacc  |
| 6181 | caagcaaaa   | tcctttctac  | aacccatctt  | cttggctgta  | ctttaaaccc  | ttgttctctt  |
| 6241 | gttggttagta | gctcaggttg  | cgtatctttg  | tgcacccaaa  | atctacatgg  | aggcctttta  |
| 6301 | acaatttcaa  | tatctatgtc  | atattcttcc  | tttatgtgat  | tcttttaaatt | tcttccttgg  |
| 6361 | tatcccatgt  | cagcccacat  | tttttttaact | ttagtatatt  | ttgttctcat  | attgtttaat  |
| 6421 | gctattttta  | taccatctct  | atcatttttcg | ttagcagcgc  | ctacgtaaca  | acctagtata  |
| 6481 | aaaccctgag  | tgtctgtaat  | tatatgcctt  | tttctaccct  | ttactttttt  | acttccatca  |
| 6541 | tagcctttga  | tccccctttt  | tctgtagtct  | ttacagattg  | actatctact  | atacaggcac  |
| 6601 | tcggctgctc  | attccttcct  | atttttcttc  | tactatatatt | tgtaattttca | taattcattt  |
| 6661 | tctcaaaaat  | tccctgcttc  | ttccattgcc  | tgaactgctc  | atacacagtc  | ttccatagcg  |
| 6721 | gaaaatcatt  | tggtaaatac  | cgccattgac  | accctgtacg  | caatacatag  | aaaattgctt  |
| 6781 | ctaataatttc | tcttttgcta  | tactttggcg  | gccttcctcc  | tttcttgtat  | gatactctga  |
| 6841 | agtgtttttc  | tattcttgcc  | cattcccttt  | cgttagatc   | tggttgatac  | ttttttctca  |
| 6901 | tctttacccc  | gtactaaaaat | ttcagatatt  | atagcctttt  | acttattttcc | ggacaac     |

```

//
LOCUS      JAQZAU010000116          591 bp    dna        linear    ENV 17-MAR-2023
DEFINITION MAG: Wolbachia pipientis isolate wEsol contig_55758, whole genome
            shotgun sequence.
ACCESSION  JAQZAU010000116  JAQZAU010000000
VERSION    JAQZAU010000116.1
DBLINK     BioProject: PRJNA929258
            BioSample: SAMN33142973
KEYWORDS   WGS; ENV; Metagenome Assembled Genome; MAG.
SOURCE     Wolbachia pipientis (insect metagenome)
  ORGANISM Wolbachia pipientis
            Bacteria; Pseudomonadota; Alphaproteobacteria; Rickettsiales;
            Anaplasmataceae; Wolbachieae; Wolbachia.
REFERENCE  1  (bases 1 to 591)
  AUTHORS  Fiutek,N., Couger,B.M., Roy,S., de la Torre,J.R. and Connor,E.F.
  TITLE    Genomic assessment of the contribution of the Wolbachia
            endosymbiont of Eurosta solidaginis to gall-induction
  JOURNAL  International Journal Molecular Sciences
REFERENCE  2  (bases 1 to 591)
  AUTHORS  Fiutek,N., Couger,B.M., Roy,S., de la Torre,J.R. and Connor,E.F.
  TITLE    Direct Submission
  JOURNAL  Submitted (10-FEB-2023) Biology, San Francisco State University,
            1600 Holloway Ave, San Francisco, CA 94132, USA
COMMENT    ##Genome-Assembly-Data-START##
            Assembly Date          :: JUN-2019
            Assembly Method        :: FLYE v. 06-2019
            Genome Representation   :: Full
            Expected Final Version :: Yes
            Genome Coverage        :: 100.0x
            Sequencing Technology  :: Illumina HiSeq; PacBio Sequel
            ##Genome-Assembly-Data-END##
FEATURES   Location/Qualifiers
    source  1..591
            /organism="Wolbachia pipientis"
            /mol_type="genomic DNA"
            /submitter_seqid="contig_55758"
            /isolate="wEsol"
            /isolation_source="galls on Solidago altissima"
            /host="Eurosta solidaginis MN-2018-EFC"
            /db_xref="taxon:955"
            /environmental_sample
            /country="USA: Cowling Arboretum, Carleton College,
            Northfield, MN"
            /lat_lon="44.48 N 93.13 W"
            /altitude="280 m"
            /collection_date="2018-11"
            /metagenome_source="insect metagenome"
            /note="metagenomic"
    gene     <1..427
            /locus_tag="wEsol_01368"
    CDS      <1..427
            /locus_tag="wEsol_01368"
            /codon_start=1
            /transl_table=11
            /product="hypothetical protein"
            /pfam="Pfam-B_16833"
            /translation="IGTESTATVSDSDSQNFATVRRSNSSSSSLTPKLTPVAPPELPRS
            ASLTNLNGQSSFSEDLSDPIVEQNLDLSNRTLTHSNSTDGSMGSGSSTLTKQVLP
            LKEEFDRELEEKLAKRRLDQTSAEFVNSRATATPGTV"
            /besthit="qcoverage 85.8156028368794 , hcoverage

```

27.0089285714286 , similarity 99.2 , identity 99.2 ,  
evalvalue 3.44e-64 , alnlength 121 , Bacteria ,  
Proteobacteria , AOV87595.1 hypothetical protein  
WG67\_03605 [Wolbachia endosymbiont of Drosophila  
incompta]"

ORIGIN

```
1 tataggaact gaaagtactg ctactgtctc tgattcagat tctcagaact ttgcaacagt
61 ccgtagaagc aattcatcta gtagcttaac tcctaagctt actccagttg ctccaccaga
121 actacctaga agcgcctcat tgactaactt aaatggacaa agttctttca gtgaagatgt
181 tctcagtgat cctattgtgg agcaaacct ggatagtttg agtaacagaa ctctcactca
241 cagtaattct actgatagtg gaatgggttc tggttcttct acgctaacaa gaaaacaagt
301 tcttccttta aaagaagaat ttgacagaga actcgaagaa aagttggcaa aacgacgcgc
361 atctctagat caaactagtg cagaacctgt caactcaaga gctacagcaa ctccaggaac
421 agtgaataaa gtaaaacttc taccttctcc aaaaggatgt tactcaatga gtaacgtcct
481 ttttttgttt ttaaactata gaaaaatcct agatcccagc ggtatgcgta caaccgtatg
541 aacattgtga tttctctgct aggaaagggtg tcatccgagt agctgacact g
```

//

LOCUS JAQZAU010000117 17868 bp dna linear ENV 17-MAR-2023

DEFINITION MAG: Wolbachia pipientis isolate wEsol contig\_55920, whole genome  
shotgun sequence.

ACCESSION JAQZAU010000117 JAQZAU010000000

VERSION JAQZAU010000117.1

DBLINK BioProject: PRJNA929258

BioSample: SAMN33142973

KEYWORDS WGS; ENV; Metagenome Assembled Genome; MAG.

SOURCE Wolbachia pipientis (insect metagenome)

ORGANISM Wolbachia pipientis

Bacteria; Pseudomonadota; Alphaproteobacteria; Rickettsiales;  
Anaplasmataceae; Wolbachieae; Wolbachia.

REFERENCE 1 (bases 1 to 17868)

AUTHORS Fiutek,N., Couger,B.M., Roy,S., de la Torre,J.R. and Connor,E.F.

TITLE Genomic assessment of the contribution of the Wolbachia  
endosymbiont of Eurosta solidaginis to gall-induction

JOURNAL International Journal Molecular Sciences

REFERENCE 2 (bases 1 to 17868)

AUTHORS Fiutek,N., Couger,B.M., Roy,S., de la Torre,J.R. and Connor,E.F.

TITLE Direct Submission

JOURNAL Submitted (10-FEB-2023) Biology, San Francisco State University,  
1600 Holloway Ave, San Francisco, CA 94132, USA

COMMENT ##Genome-Assembly-Data-START##

Assembly Date :: JUN-2019

Assembly Method :: FLYE v. 06-2019

Genome Representation :: Full

Expected Final Version :: Yes

Genome Coverage :: 100.0x

Sequencing Technology :: Illumina HiSeq; PacBio Sequel

##Genome-Assembly-Data-END##

FEATURES Location/Qualifiers

source 1..17868

/organism="Wolbachia pipientis"

/mol\_type="genomic DNA"

/submitter\_seqid="contig\_55920"

/isolate="wEsol"

/isolation\_source="galls on Solidago altissima"

/host="Eurosta solidaginis MN-2018-EFC"

/db\_xref="taxon:955"

/environmental\_sample

/country="USA: Cowling Arboretum, Carleton College,  
Northfield, MN"

/lat\_lon="44.48 N 93.13 W"

```

/altitude="280 m"
/collection_date="2018-11"
/metagenome_source="insect metagenome"
/note="metagenomic"
gene 299..673
/locus_tag="wEsol_01369"
CDS 299..673
/locus_tag="wEsol_01369"
/codon_start=1
/transl_table=11
/product="hypothetical protein"
/pfam="Surface_Ag_2 Surface_Ag_2"
/translation="MHYKKFFSAAALATLLSLSNSAFSDPVGPISEETSYYIRLQYN
GEILPLFTKVDGITYTKDNSDYSPLKASFLAGGAFGYKMDDIRVDVEGVSYLNKNT
CYRCKIYARYYCRQCNSNFRTS"
/besthit="qcoverage 81.4516129032258 , hcoverage
44.1048034934498 , similarity 100 , identity 100 , eval
5.49e-64 , alnlength 101 , Bacteria , Proteobacteria ,
WP_155969456.1 MULTISPECIES: P44/Msp2 family outer
membrane protein [Wolbachia]"
gene 624..989
/locus_tag="wEsol_01370"
CDS 624..989
/locus_tag="wEsol_01370"
/codon_start=1
/transl_table=11
/product="hypothetical protein"
/pfam="Surface_Ag_2 OMP_b-brl Opacity PagL"
/translation="MPDTIADSVTAISGLVNVYYDIAIEDMPITPYIGVGVAAYIST
PLKDAVNDQKSKFGFAGQVKAGVSYDVTPEVKLYAGARYFGSFGAHFDKDAAGKDKG
ELKVLYSTVGAEAGVAFNF"
/cog="COG3637 COG3637 199 Opacity protein and related
surface antigens"
/besthit="qcoverage 100 , hcoverage 59.9009900990099 ,
similarity 100 , identity 100 , eval 5.90e-78 ,
alnlength 121 , Bacteria , Proteobacteria , ACZ37412.1
outer surface protein precursor, partial [Wolbachia
endosymbiont of Ostrinia furnacalis]"
gene 1308..2201
/locus_tag="wEsol_01371"
CDS 1308..2201
/locus_tag="wEsol_01371"
/codon_start=1
/transl_table=11
/fullproduct="qcoverage 100 , hcoverage 100 , similarity
100 , identity 100 , eval 2.72e-202 , alnlength 297 ,
Bacteria , Proteobacteria , WP_015589362.1 MULTISPECIES:
RNA polymerase factor sigma-32 [unclassified Wolbachia]"
/cog="RpoD COG0568 342 DNA-directed RNA polymerase, sigma
subunit (sigma70/sigma32)"
/pfam="Sigma70_r1_2 Sigma70_r2 Pfam-B_208 Sigma70_r4"
/tigr="TIGR02392 rpoH_proteo 270 alternative sigma factor
RpoH"
/product="RNA polymerase factor sigma-32"
/translation="MLTPMASLCVDSRTNLMQYIARVRKFPMLSQEEEEVQLAKNWNQY
KDISSAHKLITSHLNLVVKIAMKFKNYGLLLMDLVMEGNMGLMHAVKKFNPDLGFRFS
TYAVWWIEASIKDFILKSWSFVKIGTTQAQRRLFFSLRKIKKRILQYTNRETLNNEEI
KAISNELSVSEGDI IQMNYRLACKDQSLNDCIKIGDDSKRELQDMPICNLVSQEVTYQ
NHEEKELKETILNNALASLNERARDIFISRYLSENTQTLDELSSKKYCVSRERIRQLAE
QAMAKVKQYIQSES LKFG LHA"

```

```

/blasthit="qcoverage 100 , hcoverage 100 , similarity 100
, identity 100 , evalue 2.72e-202 , alnlength 297 ,
Bacteria , Proteobacteria , WP_015589362.1 MULTISPECIES:
RNA polymerase factor sigma-32 [unclassified Wolbachia]"
gene 2194..2388
/locus_tag="wEsol_01372"
CDS 2194..2388
/locus_tag="wEsol_01372"
/codon_start=1
/transl_table=11
/product="hypothetical protein"
/pfam="Pfam-B_673"
/translation="MRSFFIFLIFFSIGAFASVSDVQLKEKYKDWLIVYTALEDGEKVC
YIVSYPKKKANIIQPTESHM"
/blasthit="qcoverage 84.375 , hcoverage 32.7272727272727 ,
similarity 100 , identity 98.1 , evalue 4.23e-28 ,
alnlength 54 , Bacteria , Proteobacteria , WP_015589363.1
MULTISPECIES: invasion associated locus B family protein
[unclassified Wolbachia]"
gene 2388..2690
/locus_tag="wEsol_01373"
CDS 2388..2690
/locus_tag="wEsol_01373"
/codon_start=1
/transl_table=11
/product="hypothetical protein"
/pfam="Pfam-B_673"
/translation="MVSIVVDKKADEVSVTSGFQYDKEPVALNIDKKIKYTLPIIQGSF
AWAEHTKIDQDLILKMKQGLSMVVNGKTKTVTIDDTYSLLGFQKAYQKMHDSCHTK"
/blasthit="qcoverage 100 , hcoverage 60.6060606060606 ,
similarity 100 , identity 100 , evalue 3.73e-65 ,
alnlength 100 , Bacteria , Proteobacteria ,
WP_015589363.1 MULTISPECIES: invasion associated locus B
family protein [unclassified Wolbachia]"
gene 2806..3963
/locus_tag="wEsol_01374"
CDS 2806..3963
/locus_tag="wEsol_01374"
/codon_start=1
/transl_table=11
/fullproduct="qcoverage 100 , hcoverage 100 , similarity
100 , identity 100 , evalue 7.44e-274 , alnlength 385 ,
Bacteria , Proteobacteria , WP_041573541.1 MULTISPECIES:
DNA polymerase III subunit beta [unclassified Wolbachia]"
/cog="DnaN COG0592 364 DNA polymerase sliding clamp
subunit (PCNA homolog)"
/pfam="DNA_pol3_beta DNA_pol3_beta DNA_pol3_beta_2
DNA_pol3_beta_3"
/tigr="TIGR00663 dnan 367 DNA polymerase III, beta
subunit"
/product="DNA polymerase III
subunit beta"
/translation="MSEVAGVDTEIKKQNSVCEQMRFSVSRTSLLNTLSRVSGVVERR
NAIDVLACINIKAQHGSIKLMATDLDISMFASLAATVLTGEVVKISAHTLHDIVKKLP
ADLDVNFEVNNQGKLLMSCGNANFSLPNVSSSFPALEEDNYKYDFTLLNTDLIDLLT
KTKFAVSLDDTRYNLNGIYLHTDEQFLYCVATDGHRLSCIKRPGKPGNINGEFGVIIIPR
KTMELLKILDDCNEIKVKLSDRKIKFTCGEYILISKLIDGTFPNYKAVIPASQDKHM
IIESKKLSVIDRVSVVVSDKVKSIKFSLQEKLLTLHSNSQECSDATESIEVDYNEAP
IEIGFNSRYLLDVLSCIKNKCKFSLADGNSATIITDEDDSNVLYVVMFMR"
/blasthit="qcoverage 100 , hcoverage 100 , similarity 100

```

```

, identity 100 , evalue 7.44e-274 , alnlength 385 ,
Bacteria , Proteobacteria , WP_041573541.1 MULTISPECIES:
DNA polymerase III subunit beta [unclassified Wolbachia]"
gene complement(4284..4787)
/locus_tag="wEsol_01375"
CDS complement(4284..4787)
/locus_tag="wEsol_01375"
/codon_start=1
/transl_table=11
/fullproduct="qcoverage 95.8083832335329 , hcoverage
85.1063829787234 , similarity 98.8 , identity 98.1 ,
evalue 2.95e-110 , alnlength 160 , Bacteria ,
Proteobacteria , EAL60107.1 tRNA pseudouridine synthase
A, partial [Wolbachia endosymbiont of Drosophila
simulans]"
/cog="TruA COG0101 266 Pseudouridylate synthase"
/pfam="PseudoU_synth_1"
/tigr="TIGR00071 hisT_truA 228 tRNA pseudouridine(38-40)
synthase"
/product="tRNA pseudouridine synthase A,
partial"
/translation="MRYKITVEYNGSSFSGWQKQQSANSIQEKIENAI FNFSGEKIA
LYCGGRTDAGVHALGQVAHFDMEKECELYRIRNAINYHLKSIPIVVLNAEVVDDAFHA
RFSAKKRYEYRIVNRYAPAALETGYVWQVFNPLDVNIMREAAKHL LGKHDLS SFVQK
IVTPQIR"
/besthit="qcoverage 95.8083832335329 , hcoverage
85.1063829787234 , similarity 98.8 , identity 98.1 ,
evalue 2.95e-110 , alnlength 160 , Bacteria ,
Proteobacteria , EAL60107.1 tRNA pseudouridine synthase
A, partial [Wolbachia endosymbiont of Drosophila
simulans]"
gene complement(4829..4981)
/locus_tag="wEsol_01376"
CDS complement(4829..4981)
/locus_tag="wEsol_01376"
/codon_start=1
/transl_table=11
/pfam="HTH_Tnp_IS630 HTH_23 HTH_28 HTH_7 CENP-B_N"
/fullproduct="qcoverage 100 , hcoverage 100 , similarity
100 , identity 100 , evalue 2.32e-30 , alnlength 50 ,
Bacteria , Proteobacteria , WP_007550541.1 IS630
transposase-related protein [Wolbachia endosymbiont of
Glossina morsitans morsitans]"
/translation="MPAAYSIDL RKKAMEALDEGESREAVAARFKIGRTTLWEWQHCR
LDHKLC"
/product="IS630 transposase-related
protein"
/besthit="qcoverage 100 , hcoverage 100 , similarity 100
, identity 100 , evalue 2.32e-30 , alnlength 50 ,
Bacteria , Proteobacteria , WP_007550541.1 IS630
transposase-related protein [Wolbachia endosymbiont of
Glossina morsitans morsitans]"
gene complement(5266..6393)
/locus_tag="wEsol_01377"
CDS complement(5266..6393)
/locus_tag="wEsol_01377"
/codon_start=1
/transl_table=11
/pfam="Cytochrom_C1 Cytochrome_CBB3 Cytochrom_C"
/fullproduct="qcoverage 100 , hcoverage 100 , similarity

```

```

100 , identity 99.7 , evalue 4.63e-272 , alnlength 375 ,
Bacteria , Proteobacteria , ONI58044.1 cytochrome C1
family protein [Wolbachia pipientis wVitA]"
/translation="MSIQSRSLTKFSVIPELSSVIPEPSFVIPVLDGTGIQKKNKWIPA
SCTQLYERCIQHTVSFHYLPLSSQCLTLGSRYNKYKSCNGQQILGVHDNHNVSDEIS
WIPVSATCMTSIRNLLKQWLCMGSNVFAIFCMLFLSSLISAEFEKSSPNKKIDWKFDG
IVGSFDRESIQRGYKVYKEVCAACHSMNRVAFRNLQDVGFSEEDVKQIAASYQVKDGP
NDLGEMFDRPGVPSDYFIAPFDTKAAAAASNNGAVPPDLSLIKARHDGANYVYSLLT
GYQNGEHDENDLYFNSYFPTGRLAMAPPLSEGMVEYDGARQATVENMAYDVINFLQWA
AEPELERRHKLGLKVVAYFIILTVFFVLTNNKVWSKLYKKK"
/product="cytochrome C1 family protein"
/besthit="qcoverage 100 , hcoverage 100 , similarity 100
, identity 99.7 , evalue 4.63e-272 , alnlength 375 ,
Bacteria , Proteobacteria , ONI58044.1 cytochrome C1
family protein [Wolbachia pipientis wVitA]"
gene complement(6393..7622)
/locus_tag="wEsol_01378"
CDS complement(6393..7622)
/locus_tag="wEsol_01378"
/codon_start=1
/transl_table=11
/fullproduct="qcoverage 100 , hcoverage 100 , similarity
100 , identity 100 , evalue 2.10e-308 , alnlength 409 ,
Bacteria , Proteobacteria , WP_006280242.1 MULTISPECIES:
cytochrome b/b6 [Wolbachia]"
/cog="QcrB COG1290 381 Cytochrome b subunit of the bc
complex"
/pfam="Ni_hydr_CYTB Cytochrom_B_N Cytochrom_B_N_2
Cytochrom_B_C"
/product="cytochrome b/b6"
/translation="MQEDNKKETIKEEKGILGWIEYRLPIFSFLRHTASYQVPKNLNY
AWNFGSLAGIALILQIITGIFLAMHYTPHVDYAFNSVERIMRDVNYGWLIRYTHAVGA
SLFFMVVYVHIMRGLYYGSYKRPREMVWFIGIFIFFAMMATAAFMGYVLPWQGMSFWGA
TVITNLFSAIPLIGNKIVIWLWGGFSVDNPTLNRRFFALHYLLPFVIIALAMLHVIALH
RFGSGNPSGVEVKSDKDTIPLYPPYIVKDCITFGLFFVVLFAFVFYAPNYLGHPDNYI
EADSMVTPVHIVPEWYFLPFYAMLR SIPDKLTGVLTMFASILVWFLLPWLDKSKVKSG
AYRPVFKKFFWVFAINFVLLAWLGGQEVKEPYITMSRLSTLYYFAYFVIVLPLLSKYE
KPKEPPKTLSDSVPEMR"
/besthit="qcoverage 100 , hcoverage 100 , similarity 100
, identity 100 , evalue 2.10e-308 , alnlength 409 ,
Bacteria , Proteobacteria , WP_006280242.1 MULTISPECIES:
cytochrome b/b6 [Wolbachia]"
gene 7965..9494
/locus_tag="wEsol_01379"
CDS 7965..9494
/locus_tag="wEsol_01379"
/codon_start=1
/transl_table=11
/pfam="Amidase_2"
/fullproduct="qcoverage 100 , hcoverage 100 , similarity
100 , identity 100 , evalue 0.0 , alnlength 509 ,
Bacteria , Proteobacteria , WP_223823148.1
N-acetylmuramoyl-L-alanine amidase [Wolbachia pipientis]"
/translation="MKNYLQSVYEDGMKIQLSKVNKYLLVLLITVSAFLISGQVSSSS
NIENDFQDLQEKPLLLKDQDLLFLDPASALNYGDRAGKKVLMVIVHHTETSTLKGTKD
TLNARGLSVHFIVDRDGSITLMVPLEKEAWHAGISYARVKVDSKLEELRKLNNYSVGI
EIVNTGLEPFPPEEQMRSVKELILYLMERFKIKRDMIFSHSEIGTIVYDPELGYTMRKP
DPHKLFDWELLEKNEIGLHISDRINPKDAKHMGKTLYKAGDRNEGILKLKQRLNRFF
YKIEPWNDKKGNVIFPDNNADYSDEFDENFVWVIYQFSIHNLPREIRKDLPLKLEQAD
IFPEFFSEYSHGISSSYLTFSEKIKSTLQPCLSKVDYENLLSSLAQYENNISPDASTT

```

```

LMYKIKLYYDSYLRRIWSSLYKPFKLNVLLEELEILKSGVLSLKSLDSSKAAEVSSLI
DSFKVDISLEFQGFQKQWFQEFKNAWRQEFIPSLEEQITWTALHEAILEYLEKAKEEI
R"
/product="N-acetylmuramoyl-L-alanine
amidase"
/besthit="qcoverage 100 , hcoverage 100 , similarity 100
, identity 100 , evalue 0.0 , alnlength 509 , Bacteria ,
Proteobacteria , WP_223823148.1
N-acetylmuramoyl-L-alanine amidase [Wolbachia pipientis]"
gene complement(9514..9762)
/locus_tag="wEsol_01380"
CDS complement(9514..9762)
/locus_tag="wEsol_01380"
/codon_start=1
/transl_table=11
/pfam="Pam16 Pfam-B_679 RPT DnaJ"
/fullproduct="qcoverage 100 , hcoverage 100 , similarity
100 , identity 100 , evalue 4.35e-49 , alnlength 82 ,
Bacteria , Proteobacteria , WP_022626406.1 DnaJ
domain-containing protein [Wolbachia pipientis]"
/translation="MNSILSKFLNEFSSRSYTENYTGDNM SKDEALKILGLNPEASQ
NEINKAYQNLMKLVHPDKGGSEYFAQKLNAARDKLLKK"
/product="DnaJ domain-containing protein"
/besthit="qcoverage 100 , hcoverage 100 , similarity 100
, identity 100 , evalue 4.35e-49 , alnlength 82 ,
Bacteria , Proteobacteria , WP_022626406.1 DnaJ
domain-containing protein [Wolbachia pipientis]"
gene 9923..10507
/locus_tag="wEsol_01381"
CDS 9923..10507
/locus_tag="wEsol_01381"
/codon_start=1
/transl_table=11
/pfam="Nfu_N NifU"
/fullproduct="qcoverage 97.9381443298969 , hcoverage 100
, similarity 100 , identity 100 , evalue 1.82e-132 ,
alnlength 190 , Bacteria , Proteobacteria ,
WP_015589367.1 MULTISPECIES: NifU family protein
[unclassified Wolbachia]"
/translation="MVNNMFIQIEETPNPNTLKF LPGFAILNEGETADFSNANEIKNS
KLAANLFQIEHVVRVFFGHDFISVTKLGEINWDTLKVEILTTIMDHFTSGGKALNKEG
VNDNNIPNEEFFDES DIEIVNRIKELMESYIKPAVAQDGGDIKFRGYKDGIVYVELQG
ACSGCPSAAITLKQGVQNMLS YHIPEVAGIETTL"
/product="NifU family
protein"
/besthit="qcoverage 97.9381443298969 , hcoverage 100 ,
similarity 100 , identity 100 , evalue 1.82e-132 ,
alnlength 190 , Bacteria , Proteobacteria ,
WP_015589367.1 MULTISPECIES: NifU family protein
[unclassified Wolbachia]"
gene 10504..11727
/locus_tag="wEsol_01382"
CDS 10504..11727
/locus_tag="wEsol_01382"
/codon_start=1
/transl_table=11
/fullproduct="qcoverage 100 , hcoverage 100 , similarity
100 , identity 100 , evalue 7.42e-292 , alnlength 407 ,
Bacteria , Proteobacteria , WP_015589368.1 MULTISPECIES:
histidine--tRNA ligase [unclassified Wolbachia]"

```

```

/cog="HisS COG0124 429 Histidyl-tRNA synthetase"
/pfam="tRNA-synt_His tRNA-synt_2b tRNA-synt_2d
tRNA-synt_2 HGTP_anticodon"
/tigr="TIGR00442 hisS 406 histidine--tRNA ligase"
/product="histidine--tRNA
ligase"
/translation="MTNQTVRGTKDLLFDEWYKFYIQQTANRISSLYGFLPAQTPIF
EYTEVFTKTLGDSSDIITKEMYSFNDKGGKSITLRPEFTAAIVRLLIEKKLQTPIKLF
STGPAFRYERPQKGRQRFHQINFEVFGIEDPKADVELISLAQHLLTEFGINKNVKLE
INSLGDGETITKYREALILYFTKYQNDLSEDSKNRLIKNPLRILDSKDEKDRLIISDA
PKISNYTKESSDFFEQILNGLTILDIPYTVNNKLVRGLDYYCHTVFEFVTEDLGAQG
AVFAGGRYDNLVSSVGGKHTPAIGFAGGIERIMELINYSPEERPIYLIPIGREAEKH
ALTLANELRRNSLYVSYEHSGTVKNRMKKASQANAKIVLIFGNDLNNNTVKVKNMDT
GEEKIARDNTIENI"
/besthit="qcoverage 100 , hcoverage 100 , similarity 100
, identity 100 , evalule 7.42e-292 , alnlength 407 ,
Bacteria , Proteobacteria , WP_015589368.1 MULTISPECIES:
histidine--tRNA ligase [unclassified Wolbachia]"
gene complement(11752..12504)
/locus_tag="wEsol_01383"
CDS complement(11752..12504)
/locus_tag="wEsol_01383"
/codon_start=1
/transl_table=11
/fullproduct="qcoverage 100 , hcoverage 100 , similarity
100 , identity 100 , evalule 3.42e-177 , alnlength 250 ,
Bacteria , Proteobacteria , WP_015589369.1 MULTISPECIES:
5'/3'-nucleotidase SurE [unclassified Wolbachia]"
/cog="SurE COG0496 252 Predicted acid phosphatase"
/pfam="SurE"
/tigr="TIGR00087 surE 252 5'/3'-nucleotidase SurE"
/product="5'/3'-nucleotidase
SurE"
/translation="MIILITNDDGFGSEGIKLLKEIARNFASEIWIVAPDTRSGAAR
SLDYPVKQSIGINQHSEREFVSVGTPADCVIIALNKVMNKKPDLILSGVNIGSNVGDD
ICYSGTIGAVMEGAARSIPSIALSQVYHDKIDWHNTKVFAPKVIKLVKVGWPKNIVM
SVNFPATEKVKGVFAEQGEYNIDGDLIFTENSNGSFSLNWSREHSGSGSINKIKEGF
ITITPVKLDFTDYDTLNAKNSCADEFSSSIAD"
/besthit="qcoverage 100 , hcoverage 100 , similarity 100
, identity 100 , evalule 3.42e-177 , alnlength 250 ,
Bacteria , Proteobacteria , WP_015589369.1 MULTISPECIES:
5'/3'-nucleotidase SurE [unclassified Wolbachia]"
gene complement(13802..15145)
/locus_tag="wEsol_01384"
CDS complement(13802..15145)
/locus_tag="wEsol_01384"
/codon_start=1
/transl_table=11
/fullproduct="qcoverage 100 , hcoverage 100 , similarity
100 , identity 100 , evalule 5.14e-301 , alnlength 447 ,
Bacteria , Proteobacteria , WP_141457276.1 MULTISPECIES:
signal recognition particle protein [unclassified
Wolbachia]"
/cog="Ffh COG0541 451 Signal recognition particle GTPase"
/pfam="SRP54_N Zeta_toxin AAA_30 SRP54 APS_kinase AAA_25
Pfam-B_2271 AAA_33 MobB ArsA_ATPase AAA_22 AAA_31 CbiA
SRP_SPB"
/tigr="TIGR00959 ffh 428 signal recognition particle
protein"
/product="signal recognition

```

```

particle protein"
/translation="MFKSLTESLNSVFSKLRGKSIISEDFFNLAMREIRIALIEADV
LEVAKKFINDIKDKVIGEKVIKSVSPAQMIIKIVQDNLVAVLGSEKSDLNLAVKPPAV
IMMVGLQGAGKTTTSGKLALKLKKQKKKVMLASLDIYRPAAQKQLEVLGKQIDVQTL
VVIDEKPITITKRALATAKNDNCDVLILDTAGRLHIDNNMMNELKAVKEIASPAEVL
VADAMIGQDAVNIAKSFNEVIGVTGIILTRVDGDARGGAALSMKMIADCPKFIACGE
KLSLDLDDFYPDRIAKRILSMGDVVSIVEKAAEIVGQEEIDKLQKKVKKGKFDLNDLV
MLKTLKMDGISNIMKFIPSSFTKKLSSSVDPDDNKVKKYIAIINSMTEKERQNPDI
GKRRRLRISKSGSTTVTDINLLIKQYNQMSSMVNKFVKVDHSLKESDLMDLSRK"
/besthit="qcoverage 100 , hcoverage 100 , similarity 100
, identity 100 , eval 5.14e-301 , alnlength 447 ,
Bacteria , Proteobacteria , WP_141457276.1 MULTISPECIES:
signal recognition particle protein [unclassified
Wolbachia]"
gene complement(15130..16689)
/locus_tag="wEsol_01385"
CDS complement(15130..16689)
/locus_tag="wEsol_01385"
/codon_start=1
/transl_table=11
/pfam="Oxidored_q1"
/fullproduct="qcoverage 100 , hcoverage 100 , similarity
100 , identity 100 , eval 0.0 , alnlength 519 ,
Bacteria , Proteobacteria , WP_015589371.1 MULTISPECIES:
oxidoreductase [unclassified Wolbachia]"
/translation="MQLYKSSLLLLLTVLIVIVLKLPELNSIAVNWSLPILDFDL
SFR
TILISFLSVAFLAVLPAQNLTFSSELSFAAYTISSLYAVLSEHMILVIFCELMTISA
FFIIAASCRDSGPAIRYACVHFFVGVILIAGLALQSTNLIILGLLINCACFPFSFWV
DAYPAASLHGTTYLSLFTTKVSFLVMLLHTYNLWQDCTEILALVGTITAIYSIIFAS
EQNIRRFILCYNVVGQMGLLIIAGGLLSPSEKAIPILILHIIIFSLVYQSLLFVVS
NSIISRTKTISFNGVGKLMVSVEGMCAIIAILTMAAFPGTAGFISKSYITAEIEAS
GANLEVYKNLYKILNLLLYLSVGLKFLYIIFIAKSKSKPLAERGGKMTMIILAFIC
VIAGNPYLPYIYNKPSIFDFVYNTKNILSQFNLLCTTLLFILLRKLFPYPRINF
KMDVDWIFRAFIPYIILLFNQLVFKVREMSANVLQNLTNLSLTSYFDNITKLKEVL
GYNSVSFVSASSFLMSILLMLLCLSR"
/product="oxidoreductase"
/besthit="qcoverage 100 , hcoverage 100 , similarity 100
, identity 100 , eval 0.0 , alnlength 519 , Bacteria ,
Proteobacteria , WP_015589371.1 MULTISPECIES:
oxidoreductase [unclassified Wolbachia]"
gene complement(16993..>17868)
/locus_tag="wEsol_01386"
CDS complement(16993..>17868)
/locus_tag="wEsol_01386"
/codon_start=1
/transl_table=11
/fullproduct="qcoverage 96.9072164948454 , hcoverage
88.9589905362776 , similarity 97.9 , identity 97.5 ,
eval 2.53e-192 , alnlength 282 , Bacteria ,
Proteobacteria , ONI55936.1 NADPH-dependent glutamate
synthase beta chain domain protein [Wolbachia pipientis
wUni]"
/translation="RGAKRIIRRIYFIENLEPVEVVTDKYNHAELIKLIDTKSGEIKR
IKARSIFIAAGTEPNTVIATEDKKHFKLSNGYFTQLNSLGKEIDPIFSPKM
QNKDRILVYKQGNKTISFFGDLHPSYSGSVVKAMASAKNGYPIISQLLRVNSFV
SVVIPVCDVVGQKKNAWPSVEDLANKELFNRIKEQFTAKVIKQYLTDKVVEIVIK
APLAAKNFKPGQF
FRLQNFETNGRKANNTNLAMEGIAVTGTEVDKKKGIISTIVLEIGGSTNL
CRHLREGQIILMGPTGRPTEVY"
/product="NADPH-dependent glutamate synthase
beta chain domain protein"

```

/besthit="qcoverage 96.9072164948454 , hcoverage 88.9589905362776 , similarity 97.9 , identity 97.5 , eval 2.53e-192 , alnlength 282 , Bacteria , Proteobacteria , ONI55936.1 NADPH-dependent glutamate synthase beta chain domain protein [Wolbachia pipientis wUni]"

ORIGIN

```
1  gtacttggat aagaggcatt gccctcctgg taggcccaaa ttgcaatggt cgtacagttg
61  tggatttctc atccgctaac aagcagcgag atgacgaggt ctttcgatag taaatcttac
121 ctgtgttagc tataccaaaa aatcaaaagt cgtatttatt cattaataaa atctttgtct
181 tctcctaaaa attagttaaa atgtagaata ttttgtgtta ttaagttagc acttgactta
241 actttagttg ttacttagac tgctaaagtg gaattttaat ttttttacga ggacaattat
301 gcattataaa aagttttttt cagcagccgc tttagcaacg ttgctaagtt tatcaaactc
361 tgctttttca gatcctgttg gtccaataag tgatgaagaa actagttact atattcgttt
421 gcaatacaac ggtgaaatth tacctctttt cacaaaagtt gatggtatta cctatacgaa
481 agacaatagt gattacagtc cattaanaagc gtcttttcta gctggtggtg gtgctgttgg
541 ttacaaaatg gacgacatca ggggtgatgt tgaaggagtt tattcatacc taaacaaaaa
601 tacatgttac agatgcaaga tttatgccag atactattgc agacagtgtg acagcaattt
661 caggactagt taacgtttat tacgatatag caattgaaga tatgcctatc actccatata
721 ttggtgttgg tgttggtgca gcgtatatta gcactccttt gaaagacgct gtgaatgatc
781 aaaaaagtaa atttggtttt gctggtcaag taaaagctgg tgttagttat gatgtaactc
841 cggaagtcaa actttatgct ggagctcggt atttcggttc ttttggtgct cattttgata
901 aagatgctgc tgcaggcaaa gacaaagggg aactcaaagt tctttacagc actgttggtg
961 cagaagctgg agtagcgttt aatttctagt ctatctcagt cttgttatcc cagtggggtt
1021 tttcttgtca tccaagtagc atgacactgg gatctagaaa aaagaaatgt ggattccagt
1081 gtcaaggcac tgggaataaca ctatttgcta tgtgtttagg ctataacggt taccattgta
1141 ctggtagaat atcatctaaa gttacataat gttatccaat tagctaacac tgcggcctac
1201 tgtctccaag aaattagatg gaaaatttgt acttttttca aatcaaagct tgaatttttg
1261 ctggaaaatc aatatattat atgcatgaag ttttaattta agttgttatg ttgaccccaa
1321 tggcaagctt atgtgtcgat agcagaacca atctcatgca atatatgtct aggggtgcga
1381 aatttcccat gctgtctcaa gaggaagaag tacaactagc aaaaaattgg aaccaatata
1441 aggatatttc ttctgctcat aaattgatta ccagccattt gaatttggtg gtgaaaattg
1501 caatgaaatt caaaaattat ggactattgt tgatggacct ggtcatggaa gggaaatatg
1561 gtttaatgca tgcagtaaaa aagtttaatc ctgatttagg gtttcgtttt tcaacttatg
1621 cagtgtggtg gattgaagct tcaataaaaag acttttatatt gaaatcttgg tcatttgtga
1681 aaataggcac aacgcaagca caaagaagat tatttttttag tttacgtaaa ataaaaaaa
1741 gaattttaca gtatacaaac agagaaactt taaataatga agaaataaaa gcaatatcta
1801 atgagctttc tgtatccgaa ggagacatta tacagatgaa ttaccgtttg gcttgtaagg
1861 atcagtcgct aaacgattgc ataaaaatag gtgatgactc taaaagggag ctacaagata
1921 tgatcccatg taacttggtc agtcaagaag taacttacca aaatcatgaa gagaaagaat
1981 taaaagaaac aatttttaaac aatgcactag caagtctcaa cgaaagggcg agagacattt
2041 ttatcagtag atatttgtct gaaaacactc aaactctgga tgaacttagt aaaaaatatt
2101 gtgtttcaag agaaagaata aggcagttgg ctgagcaggc gatggctaag gtaaaacaat
2161 atatacaatc agaaagtthg aaatttggtt tgcattgcgt gtttttttat atttctaata
2221 tttttttcaa taggcgcttt tgcattcagtt agtgatgtgc aattgaagga aaaatataaa
2281 gattggctcg tgtatactgc attggaagat ggagagaagg tatgttatat tgtatcctat
2341 ctaaaaaaaa aagcgaacat tatacaacca accgaaagcc atatgtaatg gttagttagt
2401 ttgataaaaa agcagatgag gtaagcgtha cctctggttt tcagtatgat aaggagcctg
2461 tagctctcaa tatcgacaaa aaaattaaat atacactgcc tataatacac ggaagtthtg
2521 cgtgggcaga gcatacaaaa atagatcaag atctcattct aaaaatgaag cagggtattt
2581 caatggtagt gaatgggaaa acaaaaacag tgaccattga tgatacttat tccctacttg
2641 ggthttcaaaa agcgtatcaa aaaatgcatt attcatgcca taaaaagtaa attattgtaa
2701 cagaataccc agctatagta taaaatagac tactctttca atgaatagca ctttacttta
2761 tatggaatgc ggatatcatt taaaatatat ttttgagagt tagtaatgtc agagggttga
2821 ggtgtagaca cagaaatcaa aaagcaaaat tctgtgtgag agcagatgag ttttagcgtg
2881 agccgcacaa gtctttttaa tacattatcc agagtaagtg gagtggtcga aaggcgtaat
2941 gcaatagatg ttttggcatg tataaatatc aaagcacaaac atggcagcat aaaattaatg
3001 gcaactgatc ttgacatttc aatgtttgcc tcaattgctg caaccgtatt aacagaagga
3061 gaagtaaaaa tttcagcgca tactttacat gacatagtga agaagttacc cgctgatttg
3121 gatgtcaatt ttgaagtaaa caaccaagga aaattattga tgtcttgagg aaatgcaaac
```

|      |             |             |            |             |             |             |
|------|-------------|-------------|------------|-------------|-------------|-------------|
| 3181 | ttttcttttac | cgaatgtagt  | ttcaagcagt | tttcctgctc  | ttgaagaaga  | caattataaa  |
| 3241 | tatgattttta | ctctactcaa  | tacggacctg | atagacttat  | taacccaaaac | aaaatttgct  |
| 3301 | gtatcactag  | atgatacaag  | gtataattta | aatggaatat  | atctacatac  | agatgagcag  |
| 3361 | tttctgtact  | gtgttgcaac  | tgatggccat | cgtttatcgt  | gtataaagag  | gccaaagcct  |
| 3421 | ggaaatatca  | atggcgaatt  | cggtgtgatc | attccacgta  | aaactgttat  | ggagttgtta  |
| 3481 | aaaatattgg  | acgattgtaa  | tgaaattaaa | gtaaaactct  | cagacagaaa  | aatcaagttt  |
| 3541 | acatgcggtg  | aatatattct  | aatatcaaaa | ttaatagatg  | gaacttttcc  | aaattataaa  |
| 3601 | gcagttattc  | cagcatctca  | agataagcat | atgattattg  | aaagtaaaaa  | actttcagat  |
| 3661 | gttatagatc  | gagtttccgt  | tgttgatatc | gataaagtaa  | aatccattaa  | attctcacta  |
| 3721 | caagaaaagc  | tgctaactct  | gcattcaaac | tcccaagagt  | gcagtgatgc  | aactgaatcc  |
| 3781 | atagaagtgg  | actacaatga  | agcccctata | gaaatagggt  | tcaactcgcg  | ttatttgctt  |
| 3841 | gatgttctat  | cttgcataaa  | aaataaatgt | aagttagct   | tagccgatgg  | taatagtgtc  |
| 3901 | acaattatca  | ctgatgaaga  | tgattcaaat | gtattatatg  | tagtgatgcc  | aatgagaact  |
| 3961 | taaactcgtc  | atctcgctgc  | ttgttagcga | gatctggaga  | tactgcggcg  | gtatgacact  |
| 4021 | tatttcacta  | agaacgttac  | ttttattaaa | ttagtaaatc  | atctttacca  | aatacaagcc  |
| 4081 | aaaaggcggc  | gcggtaaccc  | cagcagcact | tcttttgcat  | tggcttaata  | tatgtagcat  |
| 4141 | ttcttgcgga  | ttggttctat  | tttttccaaa | ttcaactaaa  | gtacccgcaa  | taatcctcac  |
| 4201 | ttggttatgt  | aaaaaggaaa  | tagcagatat | tttgatgtgt  | atatgattcc  | cgttttgtac  |
| 4261 | tatatcgata  | tcatacaattg | ttcttatcgg | atttgcgcg   | tgacaatctt  | ttgaacgaaa  |
| 4321 | cttgaaaggt  | catgttttcc  | aagtagatgt | ttagcagctt  | cacgcataat  | atttacatca  |
| 4381 | agtgggttaa  | acacttgcca  | tacataaccc | gtctccagag  | cggcaggagc  | atagcgatta  |
| 4441 | actattctgt  | attcgtaata  | tctttttttt | gctgaaaacc  | gtgctgaaa   | cgcacatctc  |
| 4501 | acaacttctg  | cattaagcac  | aactatagga | attgatttta  | aatgataatt  | tattgcgttt  |
| 4561 | cttattctat  | aaagctcaca  | ttccttttcc | atatcaaaat  | gagcaacttg  | tcctaaagca  |
| 4621 | tgaacccag   | catcggtcct  | tccaccacag | tacaaggcaa  | ttttctcacc  | actaaaatta  |
| 4681 | aatatagcat  | tttctatctt  | ctcctggatt | gagttagcag  | agtgttgctg  | tttttgccaa  |
| 4741 | ccagagaaac  | tactaccatt  | atattctacc | gttattttgt  | atcgactgc   | attacatcaa  |
| 4801 | gctctatcta  | aaatagtc    | tttctatctt | aacataattt  | atgggtcaagc | ctacagtgtc  |
| 4861 | gccactccca  | taaagtagtt  | cgtccaatct | taaatcttgc  | tgccactgct  | tctctgcttt  |
| 4921 | ctccttcgct  | tagcgcctcc  | attgcttttt | ttcttaaadc  | ataactatat  | gctgctggca  |
| 4981 | ttcaacctcc  | ttatcattat  | ctatccttat | cacatccgga  | cttctatgaa  | aagagctata  |
| 5041 | aatcgtagaa  | aagaactgct  | cattaagtgc | tatttgctta  | ataaattttac | tgacattgggt |
| 5101 | atggctaaat  | tcgaaatggc  | tacatgaatt | tatcgtaaat  | tattaccgta  | taagggtacga |
| 5161 | tgcgacaaag  | ccatcccagt  | gtcagctact | cggatgacac  | cgtcataaag  | gaaccagtgt  |
| 5221 | tagctacttg  | gatgacaacc  | attgtgcttg | aggcaaaatt  | gactatcact  | tctttttata  |
| 5281 | gagcttgctc  | caaactttgt  | tgtaggttaa | tacaaaaaac  | actgttaaaa  | ttataaaaata |
| 5341 | cgccactact  | tttaatccaa  | gtttatgccg | gcgctcta    | tctggctctg  | ctgccattg   |
| 5401 | taaaaaat    | atcacatcat  | acgccatatt | ttcaactgtg  | gcttgccctg  | caccatcata  |
| 5461 | ttccaccatt  | ccttcagaaa  | gtggtggcgc | catagcta    | ctgcctgttg  | gaaaatacga  |
| 5521 | attaaaaat   | aaatcatttt  | catcgtgttc | gccgttttga  | tagcctgtta  | acaatgaata  |
| 5581 | gacataat    | gcaccatcat  | gccttgcttt | aataatta    | gataagtctg  | gtgggactgc  |
| 5641 | accattgttg  | cttgctgcag  | ctgcttcttt | tgtatcaaaa  | ggcgcaataa  | aataatccga  |
| 5701 | aggtactcca  | ggtctgtcaa  | acatttcacc | caaatcattc  | ggaccatctt  | taacttgata  |
| 5761 | agaagctgct  | atttggttta  | catcttcttc | agaaaaaccg  | acatcttgca  | aattacgaaa  |
| 5821 | tgctacccta  | ttcattgaat  | gacaagcagc | acagacttct  | ttatacactt  | tatagccacg  |
| 5881 | ctgaattgac  | tctctatcga  | aagatccgac | aattccatca  | aatttccagt  | ctattttctt  |
| 5941 | atttggtgat  | gattttaa    | cttctgcaga | tataagacta  | gatagaaata  | acatgcagaa  |
| 6001 | gattgcaaat  | acattagatc  | ccatgcataa | ccactgtttt  | agtaaatttc  | gaattgatgt  |
| 6061 | catgcaagta  | gctgacactg  | gaatccagct | tatttcatca  | ctgacattat  | ggttatcatg  |
| 6121 | cactcctaga  | atctgttgtc  | cattgcatga | tttgtaaagta | tttttataacc | tggatcccag  |
| 6181 | tgtcaagcac  | tgggatgaca  | acggaagata | gtggaatgac  | actgtgtgtt  | gtatacaacg  |
| 6241 | ttcatacaat  | tgtgtacatg  | atgctggaat | ccatttattt  | tttttctgga  | tcccagtgtc  |
| 6301 | aagtactggg  | atgacaaaag  | agggtctctg | gatgacagaa  | gagagctctg  | ggatgacaga  |
| 6361 | gaatttttgta | agagatctgc  | tttgaattga | catcacctca  | tctccggcac  | agaatcactt  |
| 6421 | aaggtttttg  | gtggttcttt  | tggcttttca | tacttactaa  | gcagtggtaa  | aactatcaca  |
| 6481 | aagtatgcaa  | agtaataaag  | agtagatagc | ctactcatag  | tgatgtaagg  | ctcttttacc  |
| 6541 | tcttgtcctc  | caagccaggc  | aagaagtaca | aaatttattg  | caaaaaccca  | aaaaaatttc  |
| 6601 | ttaaaccacg  | ggcgataagc  | accactttta | acttttgatt  | tatcaagcca  | aggtaacaaa  |
| 6661 | aaccacacta  | aaatagacgc  | aaacatggta | agcacaccag  | taagtttatc  | tgggaattgaa |
| 6721 | cgtagcattg  | cataaaaagg  | taaaaaatac | cactctggca  | ctatatgtac  | cggagtgacc  |

|       |             |              |              |             |             |             |
|-------|-------------|--------------|--------------|-------------|-------------|-------------|
| 6781  | atagaatcag  | cttctatatata | attgtcttggga | tgcccaagat  | aattggggagc | atagaaaaca  |
| 6841  | aatgcgaaca  | aaactacaaaa  | aaacagacca   | aaagttatgc  | aatccttgac  | tatataataa  |
| 6901  | ggatagagag  | ggatggtatc   | cttatctgat   | tttacctcca  | ctccacttgg  | gttaccagag  |
| 6961  | ccaaacctat  | gcagagctat   | cacatgaagc   | atagctaaag  | caataataac  | aaaaggcaga  |
| 7021  | agataatgca  | gagcgaaaaa   | acgggttaagt  | gttgggttat  | ccactgaaaa  | accaccccat  |
| 7081  | aaccatataa  | ctatttttatt  | gccaatataa   | ggtatagcag  | aaaataagtt  | ggttataact  |
| 7141  | gttgcacccc  | agaaactcat   | ttgtccccaa   | ggcaatacat  | atcccataaa  | ggcagttgcc  |
| 7201  | atcattgcaa  | aaaatataaa   | tattccaata   | aaccacacca  | tctctctcgg  | tcttttataa  |
| 7261  | gatccgtaat  | ataatccacg   | cattatatga   | acatagacta  | ccataaagaa  | gagcgatgct  |
| 7321  | ccaacagcgt  | gagtgtagcg   | tattaaccac   | ccgtaattca  | catcccgcat  | tatgcgctct  |
| 7381  | acactattaa  | acgcataatc   | aacatgcgga   | gtgtagtgca  | tagcaagaaa  | tatacctggt  |
| 7441  | attattttgta | aaatcagcgc   | tataccagcc   | aaagagccaa  | agttccaagc  | ataattttaag |
| 7501  | ttttttggca  | cttggttaaga  | agcagtggtg   | cttagaaaaa  | aaaatatagg  | caatctatat  |
| 7561  | tctatccatc  | ctaatatgcc   | tttttcttct   | tttattgttt  | cttttttgtt  | atcttcctgc  |
| 7621  | ataacttaaa  | cctttctgaa   | cacatgtcca   | ttgctacttt  | tatcttattt  | ttttattgta  |
| 7681  | gcaacttatc  | ctttacgcac   | aaataaaaaa   | tttaaagcaa  | tattaattac  | ctcttcagca  |
| 7741  | acctgtcacg  | tgctgcggtt   | aattttttgtg  | caaaatattc  | cgagcctcct  | ttatctgggt  |
| 7801  | gaactaattt  | cattaaattt   | tgattgcttt   | attgatttca  | ttttgggttcg | ctccagaatc  |
| 7861  | tattcctagc  | actttaaatg   | ctccatctct   | gaacatgtta  | ctactaccag  | actagtatga  |
| 7921  | ttttgtcttg  | taaattttatt  | caacaaccct   | attctaacta  | tataatgaaa  | aattatctac  |
| 7981  | aaagtgttta  | tgaagatggt   | atgaaaatcc   | aactatctaa  | agtcaacaaa  | tatttattag  |
| 8041  | ttttactgat  | tactgtctca   | gcatttctca   | tatctgggca  | agtatccagt  | tcaagcaata  |
| 8101  | tcgagaatga  | ttttcaagat   | ttacaagaaa   | aattaccatt  | attgaaagat  | caggatttgt  |
| 8161  | tattttttaga | tccagcttca   | gctttaaatt   | atggtgatag  | ggcaggtaaa  | aaagtgttaa  |
| 8221  | tgggttatagt | tcaccatact   | gaaacatcaa   | cactaaaagg  | tacaaaagat  | acgctgaatg  |
| 8281  | ctagaggatt  | gtcagttcat   | tttattgtcg   | atagggatgg  | cagcatcacc  | ttaatgggtc  |
| 8341  | cattagagaa  | agaagcatgg   | catgctggta   | ttagttatgc  | aagagttaag  | gtagatagta  |
| 8401  | agcttgaaga  | gttacggaag   | cttaacaact   | attctgtagg  | tattgaaatt  | gtaaacacag  |
| 8461  | gacttgagcc  | ttttccggaa   | gagcaaataa   | gatctgttaa  | agagctgatt  | ttatacctta  |
| 8521  | tggagcgttt  | taaaattaaa   | agggatatga   | tatttagtca  | ttctgaaata  | ggaactatag  |
| 8581  | tgtatgatcc  | agagcttggc   | tatacaatgc   | gtaaaccaga  | tccacacaaa  | ttgtttgatt  |
| 8641  | gggagttatt  | agagaaaaat   | gaaattggat   | tgcacataag  | tgacagaata  | aaccctaaag  |
| 8701  | atgctaataa  | caaaatgggc   | aaaacattgt   | ataaagcagg  | tgatagaaat  | gaaggatttt  |
| 8761  | tgaaattaaa  | acaaaggctg   | aacagatttt   | tctataagat  | agaaccttgg  | aatgataaga  |
| 8821  | aaggtaatgt  | aattttttcct  | gataataatg   | ctgattactc  | agatgagttt  | gatgagaatt  |
| 8881  | ttgtatgggt  | tattttatcag  | ttttcaatac   | ataattttacc | aagagaaatt  | agaaaagatc  |
| 8941  | tacctcttaa  | actagaacaa   | gcagatatat   | ttcctgaatt  | cttttagtgaa | tatagtcatg  |
| 9001  | gcatttcttc  | tagttatcta   | accttttagtg  | aaaaaattaa  | atcgactcta  | caaccatggt  |
| 9061  | taagcaaagt  | agatttatgag  | aattttattat  | cttctcttgc  | acaatatgag  | aataacattt  |
| 9121  | ctcctgatgc  | atctaccact   | ttaatgtaca   | aaattaagtt  | atactatgat  | tcttatttta  |
| 9181  | gatatcgcat  | atggtcttca   | ctctataaac   | cattttaagct | taatgtattg  | gaagagttag  |
| 9241  | agatttttaa  | gagtggagtg   | ttatctttta   | aatcactaga  | tagctctaaa  | gctgcagaag  |
| 9301  | tttccagttt  | aattgatagc   | tttaaagtag   | atattttctt  | agaatttcag  | ggttttgaaa  |
| 9361  | aacagtgggt  | tcaggagttt   | aagaatgctt   | ggagacaaga  | atttatacct  | tccctggaag  |
| 9421  | aacagataac  | atgggactgca  | ctacatgaag   | caatataggga | gtattttagaa | aaagcaaagg  |
| 9481  | aagaaattcg  | ttaaacgaaa   | actttttttta  | agatcacttt  | tttaacaatt  | tatcacgtgc  |
| 9541  | cgcattttagc | ttttgcgcaa   | aatattccga   | gcctccctta  | tctgggtgaa  | ctaatttcat  |
| 9601  | taaattttga  | tatgcttttat  | tgatttccatt  | ttgacttgcc  | tcaggattca  | gccccagtat  |
| 9661  | ctttaatgct  | tcatccttgg   | acatgttatc   | accagtgtaa  | ttttcagtat  | aacttctact  |
| 9721  | gctactaaat  | tcgttcaaaa   | acttactcaa   | tatagagttc  | atcatgaaac  | tcatattatt  |
| 9781  | tttttttgtc  | aggaaaaagaa  | aaaatataac   | aacgctaggc  | aagacaaatg  | taactactat  |
| 9841  | gaatatcaaa  | aaaaggaaaa   | agatgaatga   | catgtatat   | tttttatcat  | tttatgatta  |
| 9901  | aatagtaaca  | attataatcg   | tcatggtaaa   | taacatgttc  | attcagattg  | aagaaacacc  |
| 9961  | taatccaaac  | acactgaaat   | ttctccctgg   | atttgcaatt  | ctaaacgaag  | gagaaacggc  |
| 10021 | tgattttttca | aatgcaaatg   | agataaaaaa   | ttctaaacta  | gcagcaaatc  | tttttcaaat  |
| 10081 | agaacatgtg  | gtaagagtgt   | tttttgggtca  | tgatttttatt | tcagtaacaa  | aattgggtga  |
| 10141 | aattaatttg  | gatacattaa   | aagtagaaat   | tttaactaca  | atcatggatc  | actttacttc  |
| 10201 | aggtggaaaa  | gcgctaaata   | aagaaggagt   | gaatgataat  | aacataccaa  | atgaggaatt  |
| 10261 | ttttgatgaa  | agtgatatag   | aaattgtaaa   | tagaataaaa  | gaattgatgg  | aaagttatat  |
| 10321 | caaacctgca  | gttgctcaag   | atggtggcga   | tatcaaat    | cgtggctata  | aagatggaat  |

|       |             |             |             |             |             |             |
|-------|-------------|-------------|-------------|-------------|-------------|-------------|
| 10381 | agtttatgtt  | gaattacaag  | gagcttgctc  | tggatgccc   | agtgctgcaa  | ttactttaaa  |
| 10441 | gcaaggagt   | cagaatatgc  | tgagctacca  | cataccagag  | gttgcaggta  | tagagaccac  |
| 10501 | actatgacta  | atcaaacagt  | tagaggaacg  | aaagaccttc  | tatttgatga  | gtggtataag  |
| 10561 | tttaaataca  | ttcagcaaac  | agcaaataga  | atctcaagtc  | tatacggtct  | tttgcccgcc  |
| 10621 | caaactccaa  | tatttgagta  | cacggagggt  | tttacaacaaa | ctttagggtga | tagctcagat  |
| 10681 | atcatcacta  | aagagatgta  | tagcttcaat  | gataaagggg  | gaaagagcat  | aactttacgt  |
| 10741 | cctgagttca  | ctgcagcgat  | tgtcaggcta  | ttaattgaaa  | aaaaactgca  | aacgccgata  |
| 10801 | aaattatttt  | caacagggcc  | tgcatttcgc  | tatgaaagac  | cgcaaaaggg  | aagacaaagg  |
| 10861 | caatttcac   | agataaat    | tgagggtttt  | ggcatagaag  | atccaaaagc  | cgatgttgaa  |
| 10921 | ttgatatac   | tcgctcagca  | cttactaact  | gaatttggca  | tcaataaaaa  | tgtaaagctg  |
| 10981 | gaaatcaact  | ctttagggtga | tggtgagaca  | ataactaagt  | atagagaagc  | tttgatctta  |
| 11041 | tactttacaa  | agtatcaaaa  | tgatctatca  | gaagatagca  | aaaatagggt  | gatcaaaaat  |
| 11101 | ccactcagaa  | tactagattc  | taaggatgag  | aaagatagat  | taataatctc  | tgatgcgctt  |
| 11161 | aaaatcagca  | attattatac  | gaaagagtc   | tcagatttct  | ttgaacaaat  | actaaatgga  |
| 11221 | ttaacaattc  | ttgatatacc  | ttataccgta  | aacaataaac  | tagttcgagg  | tttggtattat |
| 11281 | tattgccaca  | cagtgtttga  | gtttgttaca  | gaggatttag  | gtgcacaagg  | ggcagttttt  |
| 11341 | gccggtggaa  | gatacgataa  | tttagtatct  | tcagtaggtg  | gaaaacacac  | tccagcaata  |
| 11401 | ggatttgcag  | ggggtattga  | gcgcataatg  | gagttaatca  | attattctcc  | gaaagaagag  |
| 11461 | cgacctat    | acctaattcc  | aatcggtaga  | gaggctgaaa  | aacatgcttt  | aacacttgca  |
| 11521 | aatgaattgc  | gcagaaatag  | tttatatgta  | agttacgaac  | acagtggaac  | agttaaaaat  |
| 11581 | cgcatgaaga  | aagcaagtca  | agcaaatgct  | aaaattgtat  | tgatctttgg  | gaatgatgag  |
| 11641 | ttaaacaaca  | atactgttaa  | agtaaaaaat  | atggatacag  | gtgaagaaaa  | aataattgct  |
| 11701 | cgcgataaca  | caatagaaaa  | catctaatta  | ggagcaatgc  | aaatgttttt  | ctcagtcagc  |
| 11761 | tatagaagaa  | aattcgtctg  | cacaagaatt  | tttcatagca  | ttcaatgtat  | cataatctgt  |
| 11821 | aaaatcta    | tttactggtg  | tgatagtaat  | aaatccttct  | tttattttat  | ttatactacc  |
| 11881 | actgcctgag  | tgctctcgag  | accaatttaa  | gctaaaagag  | ccattcgaat  | tttcagtaaa  |
| 11941 | aattaaatcc  | ccatcaatgt  | tatattcacc  | ttgttcagca  | aattctactc  | cttttacttt  |
| 12001 | ttccgtagca  | ggaaaattta  | cactcatcac  | tatgttttta  | ggccaaccaa  | ccttaactag  |
| 12061 | cttggcaata  | acctttggtg  | caaaaacctt  | tgtattgtgc  | cagtctat    | tatcatgata  |
| 12121 | aacttggctc  | agtgcaatag  | aaggatataga | ccttgcagca  | ccttccatta  | cagcaccaat  |
| 12181 | tgttcctgaa  | taacaaatat  | cgtccccaac  | atltgatcca  | atatttactc  | cggacaatat  |
| 12241 | taagtctggt  | tttttattca  | taactttatt  | tagcgcaata  | atgacacaat  | ctgcaggagt  |
| 12301 | accagacaca  | ctaaattccc  | tttactatg   | ttgggtttatt | ccaatagatt  | gtttcactgg  |
| 12361 | ataatcaaga  | gatcttgcag  | ccccgcttct  | atcagtatct  | ggtgccacta  | tccatatttc  |
| 12421 | tgacgcaaaa  | ttccgtgcaa  | tctctttgag  | taattttatt  | ccttcacttc  | caaaaccatc  |
| 12481 | atcgtttgtt  | attaatatta  | tcatatacaa  | tactcagcta  | tacagctcca  | aattatgtaa  |
| 12541 | accactggct  | gtaaataaac  | tcatgaggct  | ttaagtttct  | ttgcataact  | acgaactgta  |
| 12601 | acaaagaacc  | tgctgtaaat  | caatagattt  | cttgcacagg  | ccataactgt  | cattacaata  |
| 12661 | gaaacgaaaa  | aacttgcttg  | acaaactccg  | ccagccccct  | tattatagtg  | ttaagggtat  |
| 12721 | ttatgactca  | aaacttggtt  | ttgacctgca  | ggctcaatga  | caaaattcag  | taaaaactca  |
| 12781 | gggtat      | tgggcgatta  | cataaaatta  | tagcggtctg  | atgtctttta  | aaatttttct  |
| 12841 | acattcagcc  | aaatcgcgct  | tatttttaagc | gttagcacat  | tattacagcg  | ccacttacag  |
| 12901 | taatagagag  | tcaaaactcg  | cactacgggg  | cttcttttgc  | cttttttttc  | atltggtaaa  |
| 12961 | tttcttaatg  | tttgtagcta  | aacgacaacc  | gtcatcccgc  | tgcttggttag | cgggatctct  |
| 13021 | tgtttagcgcc | gcgggcggtat | gacggttcgt  | ggcggtctga  | cgataagctc  | gtcatcccgc  |
| 13081 | tgcttggttag | cgggatctag  | agataccgcg  | aatgaatcgc  | ggtatgacgt  | aggactgctg  |
| 13141 | tcattccagt  | gcttggcact  | ggaatccagc  | ctttctgcaa  | tctcatcgaa  | aatgttgtaa  |
| 13201 | ccactttctg  | tgctagtttg  | cttgcaccaca | agcaaaacttt | cctggatccc  | agtgtctggg  |
| 13261 | cactgggatg  | acaccctttt  | ggatagaaac  | cagtgtctgg  | gcactggaat  | gacaccgaag  |
| 13321 | gggctactgc  | tgtcttggtat | ggaaaccagt  | gtcagctact  | ttcatgacac  | cctgacctcg  |
| 13381 | tcaccccgct  | acttgtttagc | gggatctaga  | gataccgcga  | atgaatcgcg  | gtatgacggt  |
| 13441 | tcgcggtggc  | atgacgtagg  | actgctgtca  | ttccagtctg  | gaatccaaaa  | aaaaggatga  |
| 13501 | cacctctggg  | cgctgggatg  | acaggagaag  | gaggctactt  | tcatgacacc  | attctttttt  |
| 13561 | ctggatccaa  | gtagtcaagc  | tactcgggatg | acacccccact | ggtggccac   | actacaatgt  |
| 13621 | tcgtacagtt  | atgaaatgaa  | tcgcggtatg  | acgtgttgct  | tgggtcagct  | atagtatttc  |
| 13681 | ttaaaattaa  | taataaat    | cttggctagc  | aagaagctgt  | aaattttttt  | gcgagaccta  |
| 13741 | agccgctttt  | gatatagcta  | aagggttact  | gatgatttgt  | ctcattccac  | tacctgctga  |
| 13801 | cttactttct  | gcttagcata  | tccatcaaat  | cagattcttt  | gagtttacta  | tgggtcaactt |
| 13861 | tactgaactt  | atlttaccata | gagctcattt  | gattatactg  | cttaattaga  | agattaatgt  |
| 13921 | cagttacagt  | tgttccggac  | cccttagaaa  | ttctaagtct  | tcttttgcca  | tttaaaatat  |

|       |             |             |             |             |             |             |
|-------|-------------|-------------|-------------|-------------|-------------|-------------|
| 13981 | ctggatttttg | cctttctttt  | tcagtcattg  | agtttatgat  | ggctatatat  | tttttcactt  |
| 14041 | tattgtcatc  | tggcacactg  | ctacttagct  | tttttgtaaa  | tgaactagga  | atgaatttca  |
| 14101 | ttatgttgct  | aatgccatcc  | attttactca  | gagtttttaa  | cattcccact  | aggtcgttta  |
| 14161 | ggtcgaattt  | accttttttc  | actttctttt  | gtaacttatc  | aatttcttcc  | tgaccaacaa  |
| 14221 | tctcagcagc  | tttttcaacc  | aatgagacaa  | catcacccat  | gctaagtatt  | ctttttgcaa  |
| 14281 | ttctatctgg  | ataaaaaatca | tcgagggtcac | ttaatttttc  | accacaagca  | ataaatttaa  |
| 14341 | ttggacaatc  | ggcgatcatt  | ttcatagaaa  | gagcagcacc  | accacgtgca  | tcaccatcaa  |
| 14401 | cacgggtaag  | aataatgccg  | gttacacctt  | ttacctcatt  | gaatgatttg  | gcaatgttga  |
| 14461 | ccgcatcctg  | gcctatcatt  | gcgtcggcta  | ctaaaataac  | ttctgcagggt | gaagctattt  |
| 14521 | cctttacggc  | tttcaactca  | ttcatcatat  | tattgtcaat  | atgaagcctg  | cctgcggtat  |
| 14581 | ctagtattaa  | tacatcacaa  | ttatcgttct  | ttgctggtgc  | tagtgccctt  | tttgtaattg  |
| 14641 | taatgggctt  | ctcgtctatt  | actacaggta  | aagtttgcac  | atctattttgt | ttacctagca  |
| 14701 | cttcaagttg  | tttttgggca  | gccggcctat  | aaatgtctaa  | agaggcaagc  | atcacttttt  |
| 14761 | tcttttgctt  | tttttagcttt | aaagcaagct  | ttcctgagggt | ggttgtttta  | cctgcacctt  |
| 14821 | gtaagccac   | catcataatc  | acagcagggg  | gtttaactgc  | tagattttaag | tcacttttct  |
| 14881 | ctgatccgag  | aactgcaact  | aaattatcct  | gcacaatttt  | aattatcatt  | tgtgctggag  |
| 14941 | aaacactttt  | tatgactttt  | tccccaatca  | ctttatcttt  | aatgtcattg  | atgaattttt  |
| 15001 | ttgcaacttc  | aagtgaacg   | tcagcttcaa  | ttaaggctat  | gcgtattttca | cgcattggcaa |
| 15061 | gattaaaatc  | atcttcagaa  | atgatcgact  | ttcctcttag  | tttactaaat  | acagaattta  |
| 15121 | aactttcgggt | taacgactta  | aacataatag  | cattagtaga  | atactcatta  | aaaagagaga  |
| 15181 | agaagctgaa  | acaaaactca  | ctgagttata  | accagcact   | tccttaagtt  | tagtaatatt  |
| 15241 | atcaaagtat  | aaactagtaa  | gtgaattagt  | caagttttgc  | agtacgttgg  | cagacatttc  |
| 15301 | tctcacttta  | aagaccaatt  | gattgaacag  | caagataata  | taggggtatga | aagctctaaa  |
| 15361 | aatccaatca  | acatccattt  | taaaatttat  | tctcgggtaa  | aataacttgc  | gtaaaagaat  |
| 15421 | gaacaataaa  | gtggtacata  | ataacaaatt  | aaattgcgac  | aaaatatttt  | ttgtgttgta  |
| 15481 | cacaaaatcg  | aaaatcgaag  | gtttatttga  | aataggttaag | taaggggtgc  | cagcaattac  |
| 15541 | gcatataaat  | gctaaaataa  | tcatagtcac  | tttgccctcc  | ctctctgcta  | aaggttttga  |
| 15601 | cttacttttt  | gcaataaata  | tgtagtaaag  | aaacttgagc  | cccacgctta  | aataaagcag  |
| 15661 | taaattttaga | atcttgtata  | agtttttata  | cacttctaaa  | ttagcaccac  | ttgcttcaat  |
| 15721 | ctcggctgta  | atgtatgatt  | tgctaataaa  | tccagcgggt  | ccaggaaatg  | cagccattgt  |
| 15781 | aagtattgctg | attatagcac  | acatgccttc  | cactgacatc  | agtttgccta  | ctccattaaa  |
| 15841 | actaattggt  | tttggtcgtg  | aaataatcga  | attgctgact  | acaaacaata  | atgattgata  |
| 15901 | aacaagagag  | aagatttatat | gcagtatcaa  | aattgggtatt | gccttttccg  | aagggtctgag |
| 15961 | taaacctcct  | gcaataatca  | gcaagcccat  | ttgtcctaca  | acgttatagc  | ataaaaaatct |
| 16021 | acgaatatatt | tgctcgagag  | aagcaaatat  | aatgctgttaa | attgcagtga  | tggtgcctac  |
| 16081 | aagcgctaatt | atttcagtag  | aatcttgcca  | taggtttataa | gtgtgtaaaa  | gcatcactaa  |
| 16141 | aaaagagact  | ttagtggtaa  | ataaagagag  | atatgtgggtg | ccatgtagcg  | atgcagcagg  |
| 16201 | atatgcatca  | acaacccaaa  | atgaaaaagg  | aaaacaagcg  | cagtttatca  | ataaacccaa  |
| 16261 | aattatcagg  | ttagtgtctt  | gaagtgccaa  | tcctgctatt  | aatataactc  | caacgaaaaa  |
| 16321 | gtgtacacaa  | gcgtacctta  | ttgcagggtcc | actatctcta  | cagctagctg  | cgataataaa  |
| 16381 | aaatgcactg  | atggtcatta  | attcacagaa  | tattataacc  | aatatcatat  | gttcagataa  |
| 16441 | aactgcataa  | agtgaactaa  | tagtgtaagc  | agcaaaaagat | agcatctctg  | aaaaagtcaa  |
| 16501 | attttgtgct  | ggtagaacag  | ctaaaaatgc  | aactgataaa  | aaagatatta  | gtatggtacg  |
| 16561 | aaaagataaa  | tcaaaaatcta | gaattgggag  | agaccaattt  | actgcaatgc  | tcaaattttc  |
| 16621 | aggtaatttt  | aggactataa  | ctattaatac  | agtcagtaga  | agtaacagtg  | acgatttata  |
| 16681 | aagttgcaca  | ataattaaaa  | ccaatatggt  | ttatgctatc  | tcaatatatg  | aataaaatca  |
| 16741 | atttgcatat  | taaccactaa  | ttaaactaat  | tatcatataa  | ttatatcaga  | gttttagaggg |
| 16801 | ttatagagaa  | accggtcaga  | ttaggttttt  | aatctaattct | gaccgatagc  | tttaatagtgt |
| 16861 | aggtaagctt  | taatatagca  | ctcctaattc  | ataacgctac  | actcgtgcat  | aatttatttt  |
| 16921 | taatttgtgc  | acgagcggtta | gtaaaattatt | tacttttttga | aataaaaattt | gacatcactt  |
| 16981 | taatattgag  | acttagtaaa  | cctcagtagg  | tctgccagtt  | gggcccataa  | gaattatttg  |
| 17041 | ctcgcttctt  | cttaagtgtc  | tgcataaaatt | agtggagccg  | ccgattttcca | gcacaatagt  |
| 17101 | ggaaataaatt | cctttttttt  | tgtctacttc  | agtgccgggtt | acggctatac  | cttccatagc  |
| 17161 | aaggtttgta  | ttattggctt  | ttctgccatt  | ggtttcaaaa  | ttttgcaatc  | taaagaattg  |
| 17221 | cccaggctta  | aaattctttg  | ccgcaagtgg  | tgctttgatc  | actattttcca | caactttgtc  |
| 17281 | tgttaaatat  | tgaactttta  | taacctttgc  | agtgaattgc  | tctttgatcc  | tattaaataa  |
| 17341 | ttcttttatta | gccagggtctt | caacacttgg  | ccacgcattt  | tttttctggc  | ccacaacatc  |
| 17401 | acacactgga  | atgacagaaa  | cgaagctatt  | aactctattc  | aaaagctggg  | aaataatagg  |
| 17461 | gtagccgttc  | ttagcacttg  | ccatagcttt  | cacaacgctg  | ccgctatac   | aaggatgaag  |
| 17521 | atcaccaaaa  | aagctgattg  | ttttattgcc  | ttgcttatac  | actaatattc  | tatctttatt  |

```
//
LOCUS      JAQZAU010000118                9730 bp    dna        linear    ENV 17-MAR-2023
DEFINITION MAG: Wolbachia pipientis isolate wEsol contig_55946, whole genome
            shotgun sequence.
ACCESSION  JAQZAU010000118  JAQZAU010000000
VERSION    JAQZAU010000118.1
DBLINK     BioProject: PRJNA929258
            BioSample: SAMN33142973
KEYWORDS   WGS; ENV; Metagenome Assembled Genome; MAG.
SOURCE     Wolbachia pipientis (insect metagenome)
  ORGANISM Wolbachia pipientis
            Bacteria; Pseudomonadota; Alphaproteobacteria; Rickettsiales;
            Anaplasmataceae; Wolbachieae; Wolbachia.
REFERENCE  1  (bases 1 to 9730)
  AUTHORS  Fiutek,N., Couger,B.M., Roy,S., de la Torre,J.R. and Connor,E.F.
  TITLE    Genomic assessment of the contribution of the Wolbachia
            endosymbiont of Eurosta solidaginis to gall-induction
  JOURNAL  International Journal Molecular Sciences
REFERENCE  2  (bases 1 to 9730)
  AUTHORS  Fiutek,N., Couger,B.M., Roy,S., de la Torre,J.R. and Connor,E.F.
  TITLE    Direct Submission
  JOURNAL  Submitted (10-FEB-2023) Biology, San Francisco State University,
            1600 Holloway Ave, San Francisco, CA 94132, USA
COMMENT    ##Genome-Assembly-Data-START##
            Assembly Date           :: JUN-2019
            Assembly Method         :: FLYE v. 06-2019
            Genome Representation    :: Full
            Expected Final Version  :: Yes
            Genome Coverage         :: 100.0x
            Sequencing Technology   :: Illumina HiSeq; PacBio Sequel
            ##Genome-Assembly-Data-END##
FEATURES   Location/Qualifiers
  source    1..9730
            /organism="Wolbachia pipientis"
            /mol_type="genomic DNA"
            /submitter_seqid="contig_55946"
            /isolate="wEsol"
            /isolation_source="galls on Solidago altissima"
            /host="Eurosta solidaginis MN-2018-EFC"
            /db_xref="taxon:955"
            /environmental_sample
            /country="USA: Cowling Arboretum, Carleton College,
            Northfield, MN"
            /lat_lon="44.48 N 93.13 W"
            /altitude="280 m"
            /collection_date="2018-11"
            /metagenome_source="insect metagenome"
            /note="metagenomic"
  gene      complement(361..1236)
            /locus_tag="wEsol_01387"
  CDS       complement(361..1236)
            /locus_tag="wEsol_01387"
            /codon_start=1
            /transl_table=11
            /pfam="Peptidase C26"
```

```

/fullproduct="qcoverage 98.6254295532646 , hcoverage 100
, similarity 100 , identity 99.7 , eval 2.34e-199 ,
alnlength 287 , Bacteria , Proteobacteria ,
WP_015589047.1 MULTISPECIES:
gamma-glutamyl-gamma-aminobutyrate hydrolase family
protein [unclassified Wolbachia]"
/translation="MSTVLTAENTVNNDVVVGLLKTEEAHELGLSQNIYEMFNNFGVK
TVLIDYNKIISLKKIQTESLNLAKQDETLAKKLTLDRIKVEVAKFVKEHKINRIFIPD
NLHSAPTPCRQLVTEAIVKIVDDNPVIHLLGICEGIMNAKGIEVVSVSDEEKRRSHL
KSAPNPQKEDVPLQQIKIVPNSRLAEVVAKFLLIPNENGWFSTYFPDAHSGAVSNTPEN
RRKLESLGYKVAAFSSEGVIEAIEDKHGNVHFQSHPEALVVKSDKNLYLSNHKERQVS
TLVAIAIMNDFLYRA"
/product="
gamma-glutamyl-gamma-aminobutyrate hydrolase family
protein"
/besthit="qcoverage 98.6254295532646 , hcoverage 100 ,
similarity 100 , identity 99.7 , eval 2.34e-199 ,
alnlength 287 , Bacteria , Proteobacteria ,
WP_015589047.1 MULTISPECIES:
gamma-glutamyl-gamma-aminobutyrate hydrolase family
protein [unclassified Wolbachia]"
gene 1595..2101
/locus_tag="wEsol_01388"
CDS 1595..2101
/locus_tag="wEsol_01388"
/codon_start=1
/transl_table=11
/fullproduct="qcoverage 100 , hcoverage 100 , similarity
100 , identity 100 , eval 1.17e-114 , alnlength 168 ,
Bacteria , Proteobacteria , WP_015589048.1 MULTISPECIES:
pantetheine-phosphate adenylyltransferase [Wolbachia]"
/cog="CoaD COG0669 159 Phosphopantetheine
adenylyltransferase"
/pfam="CTP_transf_2"
/tigr="TIGR01510 coaD_prev_kdtB 155 pantetheine-phosphate
adenylyltransferase"
/product="
pantetheine-phosphate adenylyltransferase"
/translation="MNINDKIGIYPGTFDPITFGHIDIKRACKLVDKLIIGVAENVN
KHTAFDTKLRTSMAENEIKGLGIDADVIFNGLLVKFAKEQNASVIIRGLRAVSDFDY
EFQMSWVNYKLLPEIETIFLPASEDTQFISSSFVKEIARLGEDVSKFVSKGVQNELIN
LNRIKNGE"
/besthit="qcoverage 100 , hcoverage 100 , similarity 100
, identity 100 , eval 1.17e-114 , alnlength 168 ,
Bacteria , Proteobacteria , WP_015589048.1 MULTISPECIES:
pantetheine-phosphate adenylyltransferase [Wolbachia]"
gene 2170..2361
/locus_tag="wEsol_01389"
CDS 2170..2361
/locus_tag="wEsol_01389"
/codon_start=1
/transl_table=11
/fullproduct="qcoverage 100 , hcoverage 100 , similarity
100 , identity 100 , eval 1.99e-41 , alnlength 63 ,
Bacteria , Proteobacteria , WP_006279326.1 MULTISPECIES:
zinc-finger domain-containing protein [Wolbachia]"
/cog="COG4391 COG4391 62 Uncharacterized protein
conserved in bacteria"
/pfam="zf-CHCC"
/product="zinc-finger

```

```

domain-containing protein"
/translation="MSKVRVNNRKVCCHGDENDEGSGHPLIYLDMGEEEEIACPYCEK
TFVHDCTVEAVGELTRDEL"
/besthit="qcoverage 100 , hcoverage 100 , similarity 100
, identity 100 , evalue 1.99e-41 , alnlength 63 ,
Bacteria , Proteobacteria , WP_006279326.1 MULTISPECIES:
zinc-finger domain-containing protein [Wolbachia]"
gene complement(2378..3004)
/locus_tag="wEsol_01390"
CDS complement(2378..3004)
/locus_tag="wEsol_01390"
/codon_start=1
/transl_table=11
/fullproduct="qcoverage 100 , hcoverage 100 , similarity
100 , identity 100 , evalue 1.83e-117 , alnlength 208 ,
Bacteria , Proteobacteria , WP_015589049.1 MULTISPECIES:
phosphatidate cytidylyltransferase [Wolbachia]"
/cog="CdsA COG0575 265 CDP-diglyceride synthetase"
/pfam="CTP_transf_1 CTP_transf_1 DUF46"
/product="phosphatidate
cytidylyltransferase"
/translation="MVDNFIIRMLSSIVILFIFSFATYFSDLSFYLLIFSIAVLSSF
EWYNLTQGNKILYVFALLLIALPSASLIYLYNLPQGKYALVWFVLTIWGIDVTAYLFG
KNFGGAKICPILSPGKTWTGLLGAILAGVVCTIFGSIFFGLFSIFYSPIIGLAIAILA
QLGDFTESLVKRAYGVKDSGNMIPGHGGVLD R MDSFIFTAPLIAIYIS"
/besthit="qcoverage 100 , hcoverage 100 , similarity 100
, identity 100 , evalue 1.83e-117 , alnlength 208 ,
Bacteria , Proteobacteria , WP_015589049.1 MULTISPECIES:
phosphatidate cytidylyltransferase [Wolbachia]"
gene complement(2994..3689)
/locus_tag="wEsol_01391"
CDS complement(2994..3689)
/locus_tag="wEsol_01391"
/codon_start=1
/transl_table=11
/fullproduct="qcoverage 100 , hcoverage 100 , similarity
100 , identity 100 , evalue 4.52e-168 , alnlength 231 ,
Bacteria , Proteobacteria , WP_015589050.1 MULTISPECIES:
di-trans,poly-cis-decaprenylcistransferase [Wolbachia]"
/cog="Upps COG0020 245 Undecaprenyl pyrophosphate
synthase"
/pfam="Prenyltransf"
/tigr="TIGR00055 upps 228
di-trans,poly-cis-decaprenylcistransferase"
/product="
di-trans,poly-cis-decaprenylcistransferase"
/translation="MLNQESLPKHLAIIMDGNGRWANNQGVKIDGYKKGSEVAYDIA
KYCTDLTIPYLTLYAFSMENWLRPKNETDCLFDLFYSVLTNEDKVNFCNCNIKLNFI
GNLSLLSSKILDQIKKAEEMTHKNDGLLLTVAVSYGAKQEITQAISNIIKENIAYVSE
EEFEKFLYTKDLPKLDLLIRTGGEKRLSNFLLWQAAYAELYFCDTLWPDFSCQDLSKA
LEDYTKREKKYGR"
/besthit="qcoverage 100 , hcoverage 100 , similarity 100
, identity 100 , evalue 4.52e-168 , alnlength 231 ,
Bacteria , Proteobacteria , WP_015589050.1 MULTISPECIES:
di-trans,poly-cis-decaprenylcistransferase [Wolbachia]"
gene complement(3965..4522)
/locus_tag="wEsol_01392"
CDS complement(3965..4522)
/locus_tag="wEsol_01392"
/codon_start=1

```

```

/transl_table=11
/fullproduct="qcoverage 100 , hcoverage 100 , similarity
100 , identity 100 , evalue 2.37e-120 , alnlength 185 ,
Bacteria , Proteobacteria , WP_007549203.1 MULTISPECIES:
ribosome recycling factor [Wolbachia]"
/cog="Frr COG0233 187 Ribosome recycling factor"
/pfam="RRF"
/tigr="TIGR00496 frr 176 ribosome recycling factor"
/product="ribosome recycling
factor"
/translation="MLNEIKAKTKERMLKTIQSFHDDIKGVRTGRASASLLDGIVVNI
YGGHQKLNQVAGVSVIDNKTLSEIKIWDINNVGEVKNAILNANLNPVVEGNTIRIAL
PDLTQETREKLVKLLHQFAENARIAIRNIRRDIMEETEKMKENKEISEDDFHGAKKEI
QNITDNNIKKIDGELSIKEKDILNH"
/besthit="qcoverage 100 , hcoverage 100 , similarity 100
, identity 100 , evalue 2.37e-120 , alnlength 185 ,
Bacteria , Proteobacteria , WP_007549203.1 MULTISPECIES:
ribosome recycling factor [Wolbachia]"
gene complement(4530..5273)
/locus_tag="wEsol_01393"
CDS complement(4530..5273)
/locus_tag="wEsol_01393"
/codon_start=1
/transl_table=11
/fullproduct="qcoverage 100 , hcoverage 100 , similarity
100 , identity 100 , evalue 4.84e-171 , alnlength 247 ,
Bacteria , Proteobacteria , WP_015589052.1 MULTISPECIES:
UMP kinase [unclassified Wolbachia]"
/cog="PyrH COG0528 238 Uridylate kinase"
/pfam="AA_kinase"
/tigr="TIGR02075 pyrH_bact 233 UMP kinase"
/product="UMP kinase"
/translation="MFPSTNEKSEIKYSRVLFKISGEALMGSSQSGYDMGIISQLCKD
IADINRLGVQVCIVVGGGNIFRGTSASLSGCERASSDYIGMLATIINALILQNFLEKN
LIASRVLSAIPMATVCEPYIRRKAIRHLEKGRVVIFAAGTGNPFFTTDTAAALRAVEM
NCDVILKGTQVNGVYSADPKKNEDAVMYDRLSYTDLLTRDLKVM DASAISLARENSIP
IIVFSLKGKIVNIIKGQGTYTIVSDCKH"
/besthit="qcoverage 100 , hcoverage 100 , similarity 100
, identity 100 , evalue 4.84e-171 , alnlength 247 ,
Bacteria , Proteobacteria , WP_015589052.1 MULTISPECIES:
UMP kinase [unclassified Wolbachia]"
gene complement(5284..6144)
/locus_tag="wEsol_01394"
CDS complement(5284..6144)
/locus_tag="wEsol_01394"
/codon_start=1
/transl_table=11
/fullproduct="qcoverage 100 , hcoverage 100 , similarity
100 , identity 100 , evalue 3.42e-195 , alnlength 286 ,
Bacteria , Proteobacteria , WP_015589053.1 MULTISPECIES:
translation elongation factor Ts [unclassified
Wolbachia]"
/cog="Tsf COG0264 296 Translation elongation factor Ts"
/pfam="UBA Ribosomal_L12 EF_TS"
/tigr="TIGR00116 tsf 293 translation elongation factor
Ts"
/product="translation
elongation factor Ts"
/translation="MKMNPDDIRELRDRTGLGLSDCKKALEECDGDIKKAVDKLRTIG
LAKADKKSDRVASDGLVVMCLTENY GALVELNCETDFVARNEKFIELVSNLASIAHQE

```

```

RCTSVDELKNAKYESIGTVQEAIMNGTSLVGEKLELSKLCYLEAKDGVVIAGYVHGDVC
GLGKIGALIALQSSGDKAKLQEIGKQIAMHVAMKPEALSIDDLQMKLKNERSIIEE
QVRGLNKPEEVAKKIVDGRMAKYEEVVLLEQKFIDDKMKVSDFIKSSEVSAIKLSN
YKLLVLGGAN"
/besthit="qcoverage 100 , hcoverage 100 , similarity 100
, identity 100 , evalue 3.42e-195 , alnlength 286 ,
Bacteria , Proteobacteria , WP_015589053.1 MULTISPECIES:
translation elongation factor Ts [unclassified
Wolbachia]"
gene complement(6125..6973)
/locus_tag="wEsol_01395"
CDS complement(6125..6973)
/locus_tag="wEsol_01395"
/codon_start=1
/transl_table=11
/fullproduct="qcoverage 100 , hcoverage 100 , similarity
100 , identity 100 , evalue 6.17e-196 , alnlength 282 ,
Bacteria , Proteobacteria , WP_015589054.1 MULTISPECIES:
30S ribosomal protein S2 [unclassified Wolbachia]"
/cog="RpsB COG0052 252 Ribosomal protein S2"
/pfam="Ribosomal_S2"
/tigr="TIGR01011 rpsB_bact 225 ribosomal protein S2"
/product="30S ribosomal
protein S2"
/translation="MTNLPKVTVRDLAESGVHFGHKISRWNAMAPYIYGVHQENRIH
IIDLRKTLPLLQVAMKALYDVAFAQGGRILFVGTFKQAFDIIASEAIRCGQYYVNRWL
GGMLTNWGTVSSSIKTLMQYEKILNDEDSILTKKELGNIEKKKQKLDKALGGIREMGA
IPDILFIIDTNKEHIAVKEAKKLGIPVAILDTNSDPDGITYLIPGNDSDSRKSIELYC
KLATDSILAGIESSLAKSGVKIDDIRGDEFIQEKEDGIVQTKRRRSKVYKEEEREVVT
NEDESR"
/besthit="qcoverage 100 , hcoverage 100 , similarity 100
, identity 100 , evalue 6.17e-196 , alnlength 282 ,
Bacteria , Proteobacteria , WP_015589054.1 MULTISPECIES:
30S ribosomal protein S2 [unclassified Wolbachia]"
gene 7371..7742
/locus_tag="wEsol_01396"
CDS 7371..7742
/locus_tag="wEsol_01396"
/codon_start=1
/transl_table=11
/fullproduct="qcoverage 100 , hcoverage 100 , similarity
100 , identity 100 , evalue 3.35e-72 , alnlength 123 ,
Bacteria , Proteobacteria , WP_015589055.1 MULTISPECIES:
preprotein translocase subunit YajC [Wolbachia]"
/cog="YajC COG1862 97 Preprotein translocase subunit
YajC"
/pfam="YajC DUF4131 DUF912"
/product="preprotein
translocase subunit YajC"
/translation="MLISEVFAADATSNTSSIGASFASFTPLILIFVVFYFLIIRPQQ
KKLKEHRKMIDQIKRGDTVITSGGIIGEVNKKVDEANAQFIIEIAPKVEIKVLKSAISE
VLSKETQKVAAPKPIKKVKSKE"
/besthit="qcoverage 100 , hcoverage 100 , similarity 100
, identity 100 , evalue 3.35e-72 , alnlength 123 ,
Bacteria , Proteobacteria , WP_015589055.1 MULTISPECIES:
preprotein translocase subunit YajC [Wolbachia]"
gene 7805..9634
/locus_tag="wEsol_01397"
CDS 7805..9634
/locus_tag="wEsol_01397"

```

```

/codon_start=1
/transl_table=11
/fullproduct="qcoverage 100 , hcoverage 100 , similarity
99.8 , identity 99.8 , evaluate 0.0 , alnlength 609 ,
Bacteria , Proteobacteria , WP_222933332.1
glutamine--fructose-6-phosphate transaminase
(isomerizing) [Wolbachia endosymbiont of Drosophila
sechellia]"
/cog="GlmS COG0449 597 Glucosamine 6-phosphate
synthetase, contains amidotransferase and phosphosugar
isomerase domains"
/pfam="GATase_2 GATase_4 GATase_6 GATase_2 GATase_7 SIS
SIS_2 SIS"
/tigr="TIGR01135 glmS 607 glutamine-fructose-6-phosphate
transaminase (isomerizing)"
/product="glutamine--fructose-6-phosphate
transaminase (isomerizing)"
/translation="MFGDPFVCGIFGVVSSGDSVIPTLLTGLQKLEYRGYDSSGIAII
NNEGKIEVKKSEGGKVERLCEVVDDSKMSHSTVGIAHTRWATHGVPGLKNAHPIRTNNV
VVAHNGIIEYNLLKKGLEERGMPFHTDTEIIPNMLTLYLDEGLSPVDSLFKCLNN
LHGSAFVLLFAEYPDALFVAKRNLPLAIGYNCNTVFAASDSNALSFAVEKISHLEDD
DIAVIKSSGVSIYNGTQVKRSIENSSPSDFLISKNGYPSFMLEIFEQPCALNKTIN
QFYKQYKEVNKKLFSELNHITIVGCGSSYFAGLIAKYWLENVAQVRVYLEISSEFRYS
NVKLEEGSIGLFISQSGETADTIEALRYAKSQKQTIISITNTFSSSIEKISDIVLHTL
AGPEIGVASTKTFSAQLATLACFAVELGKIKGILGGERIKQLSSAINSIPEYVEHVLN
VMKIQHISGSILEHNNVILIGRGSSYGVAMEGALKIKELSYINTTGIAAGEMKHGSIA
LIDSTVLVIAIIPYDDLFFKTLISNIQEI IARKGKVIAFSDKQGAPFLRGVCADVQQLP
DTDNFISPIIYSVAMQFLAYFTAACKGLDADCPRLAKSVTVTE"
/besthit="qcoverage 100 , hcoverage 100 , similarity 99.8
, identity 99.8 , evaluate 0.0 , alnlength 609 , Bacteria ,
Proteobacteria , WP_222933332.1
glutamine--fructose-6-phosphate transaminase
(isomerizing) [Wolbachia endosymbiont of Drosophila
sechellia]"
gene 7165..7241
tRNA /locus_tag="wEsol_tRNA-25"
7165..7241
/locus_tag="wEsol_tRNA-25"
/gene="tRNA-Asp"
/intronpos="0..0"
/program="tRNAscan-SE"
/cove_score="77.4"
/evidence=predicted
/type="Asp"
/anticodon=GTC
/product="tRNA-Asp (GTC)"
gene complement(1443..1515)
tRNA /locus_tag="wEsol_tRNA-26"
complement(1443..1515)
/locus_tag="wEsol_tRNA-26"
/gene="tRNA-Phe"
/intronpos="0..0"
/program="tRNAscan-SE"
/cove_score="75.8"
/evidence=predicted
/type="Phe"
/anticodon=GAA
/product="tRNA-Phe (GAA)"

```

ORIGIN

1 taactttaaa atcatagaaa atactgtcga aaaaggaagt tttcttggtc gtgtaaaact

|      |             |             |             |              |             |             |
|------|-------------|-------------|-------------|--------------|-------------|-------------|
| 61   | caacacaatg  | gatttttctga | aaagtttttcg | agtatatattat | atttttaaatt | tgtagaataa  |
| 121  | ggtttttttcc | tttttgcata  | tttcaccta   | aaaggacaca   | tttttagactt | ctttgttgaa  |
| 181  | ataaaacaga  | aacaaaagt   | ctgtcccttg  | cactcttttg   | ataattta    | gataaaaaat  |
| 241  | ttggagagaa  | attttatata  | ctatcgctga  | tatttttcct   | taagttgacg  | ccattgcctg  |
| 301  | aacggatata  | tgacaaatct  | atcgtttatc  | aaatcgctcg   | taagcctaaa  | gctatagcca  |
| 361  | ttaagcacga  | taaagaaaat  | cattcataat  | cgctatagca   | actagtgtag  | acacttgacg  |
| 421  | ttccttgtga  | tttgataaat  | agaggttttt  | atctgacttc   | acaacaaggg  | cttctggatg  |
| 481  | actttgaaag  | tgaacattac  | catgcttatc  | ttcaatagcc   | tctattaccc  | cctcactgga  |
| 541  | aaatgctgca  | actttatatc  | caagtgactc  | caattttctt   | ctattttctg  | gtgtattact  |
| 601  | tactgctcct  | gaatgagcat  | ctggaaaata  | tgttgaaaac   | cagccatttt  | cattaggtat  |
| 661  | taggaatttg  | gctactactt  | ctgctaaacg  | actatttgga   | acgatcttta  | tctgctggag  |
| 721  | aggtacatcc  | tctttctgtg  | gattaggtgc  | tgattttaaa   | tgagatcttc  | gtttctcttc  |
| 781  | atcactcaca  | acactcacta  | cttcaattcc  | ctttgcattc   | attatgcctt  | cacatatgcc  |
| 841  | aagcaaata   | attacagggg  | tatcatccac  | tattttttaca  | attgcttcag  | taacaagctg  |
| 901  | gcgacaagga  | gtgggtgctg  | agtgtaaatt  | atccggaata   | aatattctat  | ttattttgtg  |
| 961  | ctctttaaca  | aactttgcaa  | cttcaacttt  | tattcgggtct  | aatgttagct  | tctttgccaa  |
| 1021 | tgtttcatct  | tgttttgcaa  | gattaagtga  | ctctgtctga   | attttttttaa | ggctaattat  |
| 1081 | cttattataa  | tcaatcagta  | cagtcttaac  | cccaaagtta   | ttaaacaatct | catagatatt  |
| 1141 | ttgagatagc  | ccaagtccat  | gtgcttcttc  | cgttttcaac   | aaaccaacaa  | ctacgtcatt  |
| 1201 | atttactgta  | ttttctgccg  | tcaagacagt  | tgacactggg   | tcttcttttc  | tggttacatg  |
| 1261 | ttgagatgcc  | ggtttttcac  | taacgccagc  | ataagtaata   | ttgcttaata  | atagaactat  |
| 1321 | aattaataag  | atattaaata  | gtttattata  | atatttatat   | actatgactt  | gcctccctaa  |
| 1381 | tatttatatt  | acgatataga  | gtattttata  | acaaaaaggc   | aagtttgcca  | agaaagagaa  |
| 1441 | ggtggcctga  | gcaggaatcg  | aaccagcgac  | acaaggattt   | tcagtccttt  | gctctaccaa  |
| 1501 | ctgagctatc  | aggccaactg  | tatactttta  | tttttagata   | aaaaatgtta  | ttatgtctat  |
| 1561 | caaaagtttt  | taaagtagtt  | tataaaaaata | aaggatgaac   | attaatgaca  | aaataggaat  |
| 1621 | ctaccctggc  | acatttgacc  | ctataacttt  | tgggcatatt   | gacataatca  | aaagagcgtg  |
| 1681 | taaactagtc  | gataaattaa  | taataggagt  | tgcagaaaac   | gttaataagc  | atactgcctt  |
| 1741 | tgacacaaag  | ctacgcacaa  | gcatggctga  | aaatgaaatc   | aaaggactag  | gaattgatgc  |
| 1801 | agatgttata  | tcttttaatg  | ggttgctagt  | gaagtttgcc   | aaagagcaga  | atgcttctgt  |
| 1861 | tattattagg  | ggattaagag  | cagtatcgga  | ttttgattac   | gagtttcaaa  | tgagctgggt  |
| 1921 | aaattataaa  | cttcttcctg  | aaatcgaaac  | catatttctt   | cctgcttctg  | aagatactca  |
| 1981 | atztatctca  | tcaagttttg  | taaaggaaat  | agcaagatta   | ggagaagatg  | ttagcaaatt  |
| 2041 | tgtatcaaaa  | ggcgttcaaa  | acgaattgat  | taacctgaat   | aggataaaaa  | atggagaata  |
| 2101 | gtgcttggtg  | ttttttat    | ctgaatgggt  | atattcaata   | tataaaatgt  | tataagctaa  |
| 2161 | aggagcagca  | tgtcaaaaagt | gagggttaat  | aatagaaaag   | tttgttgtca  | tggtgatgag  |
| 2221 | aatgatgagg  | gttctggcca  | tccattaata  | tatttagata   | tgggagaaga  | agaggaaata  |
| 2281 | gcctgccctt  | attgtgaaaa  | gacgtttgtc  | catgactgca   | ctgtagaagc  | ggttggggag  |
| 2341 | ctgactaggg  | atgaactcta  | atggcacttc  | tgcagactta   | gcttatgtaa  | atagcaataa  |
| 2401 | gaggggcagt  | aaaaatgaaa  | ctgtccatac  | ggtcgagcac   | tcccccatgg  | ccaggtatca  |
| 2461 | tatttccact  | atctttaaca  | ccgtaagctc  | ttttaacaag   | cgactcagtg  | aaatcgccaa  |
| 2521 | gttgcgctag  | aatagcaatt  | gcaaggccaa  | tgattggaga   | ataaaaaaatt | gaaaaatagac |
| 2581 | caaaaaatat  | tgatccaaaa  | attgtgcaca  | ctactccagc   | taaaatcgca  | ccaagaagtc  |
| 2641 | ctgtccaagt  | ttttccaggg  | ctaagaattg  | ggcaaat      | agctccacca  | aaattcttac  |
| 2701 | caaataggta  | ggcagtaacg  | tcaattcccc  | aaatgggttaa  | gacgaaccat  | actaatgcgt  |
| 2761 | attttccctg  | tggtagatta  | tataaatata  | ttaatgaggc   | gcttggtagt  | gcaatcaata  |
| 2821 | ataatgcaaa  | aacgtataaa  | attttat     | cttgggttag   | attataccat  | tcaaaagaag  |
| 2881 | ataaaaactgc | tattgaaaaa  | atcaatagg   | aaaacgataa   | atcactgaaa  | tatgtagcaa  |
| 2941 | aggaaaatat  | gaataatatt  | actattgagg  | acaacattct   | aattataaaa  | ttattatcta  |
| 3001 | ccatattttt  | tctctctttt  | tgtataatct  | tctaattgctt  | tactcaaatc  | ttgacaagaa  |
| 3061 | aatcaggcc   | ataaaagtatc | acaaaaatac  | aattcagcat   | aagctgcttg  | ccataataaa  |
| 3121 | aagttgctta  | accttttttc  | gccgccagtg  | cgaattaata   | aatccaattt  | tggtcaaatct |
| 3181 | ttagtataca  | gaaat       | aaattcctct  | tctgatacat   | aagcaatatt  | ttcttttata  |
| 3241 | atattgctta  | tagcttgtgt  | aatttcttgc  | tttgcctcgt   | aactgactgc  | cacagtgagt  |
| 3301 | aataaaccat  | cgttcttatg  | tgtcatttct  | tctgcttttt   | taatttgatc  | caatatttta  |
| 3361 | ctggataaca  | gacttaaat   | gccaataaaa  | ttcaacttaa   | tgttacagtt  | gcaaatgaaa  |
| 3421 | ttgactttat  | cttcattagt  | taaaacggag  | taaaataaat   | caaatagaca  | gtcagtttcg  |
| 3481 | tttttgggtc  | taagccaatt  | ctccatagag  | aatgcataca   | aagttaagta  | gggtatggtt  |
| 3541 | aggtccgtac  | aatacttggc  | aatatcgtat  | gcaacttcac   | tgcccttttt  | ataaccatca  |
| 3601 | atttttacct  | ttccttgatt  | gttcgcccat  | ctaccattac   | catccataat  | aattgctaaa  |

|      |             |             |             |             |             |             |
|------|-------------|-------------|-------------|-------------|-------------|-------------|
| 3661 | tgtttcggtg  | aagattcttg  | attcaacatt  | taaatttaac  | ctaattttga  | cttgagtga   |
| 3721 | atTTTTtTgga | tttcaatgga  | cacctggaag  | gtgtcagcta  | cttgcatgac  | aggaagagag  |
| 3781 | ttactgtagt  | gacaccaata  | gttgatactt  | gaatgcaaaa  | ttgggtgtcat | cccagtgtct  |
| 3841 | cgacactggg  | atccaggaaa  | tttgatttca  | aacaagtgca  | tcagatagtt  | gtatagtaaa  |
| 3901 | gactggattc  | cagtgtcaag  | cactggaatg  | acatcatttg  | ctatgtaagc  | tttctccata  |
| 3961 | tcattttagt  | attcagtata  | tccttttctt  | tgatggacaa  | ttcaccatca  | atTTTTtTta  |
| 4021 | tattattatc  | agtaatatTT  | tgtatttctt  | tttttagcacc | atgaaaatca  | tcttctgaga  |
| 4081 | tttctttatt  | ttccttcatt  | ttttctgttt  | cttccataat  | atctctacgt  | atatttctaa  |
| 4141 | tggcaatccg  | tgcattttca  | gcaaactgat  | gcaataattt  | cactaatttt  | tcacgggttt  |
| 4201 | cttgtgttaa  | gtccggaaga  | gctatacgta  | tggtattgcc  | ctcaacaaca  | ggattttaa   |
| 4261 | tcaagttggc  | atttaatat   | gcatttttca  | cttcaccgac  | aacattaata  | tcccaaattt  |
| 4321 | taattgatag  | agttttgTta  | tctataaccg  | aaacacctgc  | aacctgattt  | aacttttgat  |
| 4381 | gtccaccata  | gatatttaca  | actataccat  | caagcaacga  | tgcgctagct  | ctaccagtgc  |
| 4441 | gtacgccttt  | aatatcatca  | tgaaggact   | gaatagtttt  | tagcattctt  | tcttttgTtt  |
| 4501 | tagcttttat  | ttcattttaac | ataaattacc  | taatgtttac  | aatctgaaac  | tatagtataa  |
| 4561 | gtaccttgac  | ccttaataat  | attgactatt  | ttttctccct  | tcaaagaaaa  | aactataatt  |
| 4621 | ggaatagaat  | tctcacgagc  | aagtgaatt   | gctgatgcat  | ccataacttt  | taaatcacga  |
| 4681 | gtcaataaat  | ccgtgtaaga  | aagcctatca  | tacattacag  | catcctcatt  | ttttttcgga  |
| 4741 | tcagcggagt  | atacaccatt  | tacttgcgta  | cccttttagaa | taacatcaca  | attcatttca  |
| 4801 | acagcacgta  | aggctgcagc  | tgtatctgta  | gtaaaaaatg  | ggttgccctgt | gcctgctgca  |
| 4861 | aaaattacca  | ctctaccttt  | ttctaaatga  | cgaatagctt  | tccttcttat  | gtaaggttca  |
| 4921 | catacagtgg  | ccatgggtat  | tgcagataat  | accctagaag  | ctattaaatt  | tttttctaaa  |
| 4981 | aagttttgta  | aaattaaagc  | attgattata  | gttgcaagca  | ttccaatata  | atcactactt  |
| 5041 | gctctttcac  | agccacttaa  | agacgcagat  | gtgccacgaa  | agatattacc  | accaccaaca  |
| 5101 | acaatacata  | cctgaactcc  | aagcctgtta  | atatcagcta  | tatctttgca  | taattggctt  |
| 5161 | attattccca  | tatcatagcc  | aaaagactgt  | gaccccata   | aagcttcacc  | agagatttta  |
| 5221 | aataacactc  | tgggaatattt | tatttcgctt  | ttttcatttg  | ttgagggaaa  | cattttttac  |
| 5281 | catttagttt  | gcaccacca   | aaacaagtaa  | cttgtaatta  | gataatttaa  | tagcactcac  |
| 5341 | ctcgcttgac  | tttataaaa   | cagaaacttt  | catttttatca | tccttttatga | acttttgTtc  |
| 5401 | tagtaaaaaca | acttcttcat  | agtacttagc  | cattcggtcca | tctactattt  | tttttgctac  |
| 5461 | ttcttcaggT  | ttattttaagc | ccctcacttg  | ctcttcaatt  | atagaacggt  | catttttcaa  |
| 5521 | cttcattttga | tctaaatcat  | ctatagacaa  | agcttcaggc  | ttcatagcaa  | ctacatgcat  |
| 5581 | agctattttgt | ttcccaatct  | cttgtagctt  | cgccttatca  | ccagatgatt  | gcaatgcaat  |
| 5641 | taaagcacca  | atcttaccta  | agccacacac  | atcaccatgt  | acgtagccag  | caataactcc  |
| 5701 | atccttagct  | tctaagtaac  | aaagcttgct  | taactctagc  | ttctcaccaa  | gaactgacgt  |
| 5761 | accattcata  | atagcttcct  | gcactgtgcc  | aatgctttca  | tacttggcat  | tttttaactc  |
| 5821 | atcaacgcta  | gtacagcgTt  | cttgatgagc  | aattgatgct  | aaatttgaaa  | ctaactctat  |
| 5881 | aaattttctca | ttccttgcaa  | caaaatctgt  | ttcgcaattg  | agttcaacca  | atgcaccata  |
| 5941 | atTTtTcagtc | aaacacataa  | caacgagtcc  | atctgaagct  | actctatcag  | atTTTTtTgtc |
| 6001 | agcttttagca | agacctattg  | tacgtaactt  | atcaacggct  | ttcttaatgt  | caccatcaca  |
| 6061 | ttcttctaat  | gctttttttac | agtcaactta  | gccaaagcct  | gttctatcac  | gtaattctct  |
| 6121 | tatatcatct  | ggattcatct  | tcatttgTta  | ctacctccct  | ttcttcttct  | ttgtaaactt  |
| 6181 | tactacgtct  | cttttttagTt | tgcacaatac  | cgtcttcttt  | ttcttgaata  | aactcatcac  |
| 6241 | cccttatatc  | atcaatctta  | actccagatt  | ttgctagact  | agactctatt  | ccagctaata  |
| 6301 | tagagtcggt  | agctaattta  | caatagagct  | ctattgattt  | tcttgagtca  | tcatttccag  |
| 6361 | gtattagata  | agtaatacca  | tctggatcag  | aattagtatc  | aagtattgca  | actattggaa  |
| 6421 | ttcctaactt  | cttagcctcc  | ttaaccgcta  | tatgctcttt  | attagtatca  | atgatgaata  |
| 6481 | agatatcagg  | aattgctccc  | atTTtctctaa | taccgccaaag | cgccttatca  | agcttttgct  |
| 6541 | ttttcttttc  | aatgtttccc  | aattctttct  | ttgttaaaat  | gctatcctcg  | tcatttaata  |
| 6601 | ttttctcata  | ttgcatcaag  | gttttttatcg | agaagaaaac  | agtgccecaa  | ttagtaagca  |
| 6661 | taccaccaag  | ccaacgatga  | ttcacataat  | attgaccaca  | acgaatcgct  | tcacttgcaa  |
| 6721 | taatatcaaa  | agcttgaaac  | tttgtaccaa  | caaatagaat  | gcgaccacct  | tgaaatgcaa  |
| 6781 | cgTcatataa  | agccttcatg  | gccacctgta  | gcaatggtaa  | tgTTTTtTcgc | aagtcaatta  |
| 6841 | tatgtatacg  | atTTtcttga  | tgtaccccat  | atataatatg  | agccattttt  | gcgttccagc  |
| 6901 | gactaatttt  | gtgaccaaaa  | tgtacaccag  | attcagctaa  | atcacgcaca  | gtgactttag  |
| 6961 | gcaaatttgT  | catatatcat  | tcctccaaat  | agTTtTatctt | ccatggcata  | accctaattg  |
| 7021 | gactacttgt  | acaagccatg  | tgtgaaatta  | aattattttac | atagtaatag  | aaaagacagc  |
| 7081 | aaagcgcaaa  | caaaaaatat  | tgacaaaggg  | caacatgttt  | attagcttta  | aagttgaagc  |
| 7141 | ccgaaaacgc  | taaaaagaaa  | ttaggggggt  | gtagctcagt  | tggttagagc  | gcatgcctgt  |
| 7201 | cacgcatgag  | gtcgtgagTt  | caagtctcat  | cactcccgc   | atattagTtt  | tagcataact  |

```

7261 tagaattcgc aaccgatatt gagaaatgct tccaccaaac ttgacatggc atggtattgt
7321 aattaatact taaataggtt tgtttttatc attaacaatt aggattaaat atgctcattt
7381 ctgaagtttt tgcagcagat gcaactagca atacatcaag tatcggcgca tcttttgcta
7441 gttttactcc attgatttta atatttgtgg tattttattt tctcattatt cgcccacaac
7501 aaaaaaaact aaaagaacat agaaagatga tagatcaaat aaaacgtggg gatacagtca
7561 ttacttctgg tggataataa ggtgaagtta ataaagttga tgaggcaaata gcacaattta
7621 taatagaaat agcaccaaaa gttgagataa aagttctaaa gtccgctata tctgaggttt
7681 taagcaaaga aactcaaaaa gtagcagcta aaccaattaa aaaggtaaaa tcgaaagaat
7741 gataaaaaga atataaatca accagtaata aaggcaaaaa tgcttaacat gtttagaaaa
7801 aagtttgttt ggtgatccat ttgtgtgcgg aatatttggt gtagtaagta gcggtgattc
7861 agtaatacca accttactaa ctgggttaca aaaattggaa tataggggat atgattcctc
7921 aggtatagca atcataaata acgaaggtaa gatagaagtc aaaaaatcag aaggtaaagt
7981 cgaaaggtta tgtgaagttg ttgatgacag caagatgtct cacagtacag ttggtatagc
8041 acatactcgc tgggctacac atggagttcc aggccttaaa aatgctcatc ccattcgtac
8101 aaataatggt gttgttgctc ataacggcat aattgagaat tacaatctgc taaaaaaggg
8161 tctagaagaa aggggaatgc cattccatac tgacactgac acagagatca taccaaakat
8221 gctaacctta tatcttgatg aaggattgtc gccagttgat tctctattta agtgtttaaa
8281 caacctacac ggctcatttg ccttggtctt attatttgca gaatatccag acgccttatt
8341 tggtgcgaag agaaatttgc ctttagcaat aggctataac tgtaacacag tgtttgctgc
8401 atctgactct aatgctttta gtgcatttgt ggaaaaaata tcgcatttgg aagatgatga
8461 cattgcagtg ataaaatcta gtggagttag tatatacaac aatggtacac aagttaaacg
8521 cagtataгаа aatagtagtc caagtattt tctaattagc aaaaatgggt accctagctt
8581 catgttaaaa gagatttttg agcaaccttg tgcattaaac aaaacaataa accaatttta
8641 caagcaatat aaagaggtca acaaaaaatt attctctgaa ctgaatcaca ttactatagt
8701 tggatgcggg tcatcttatt ttgctgggct aatagcaaag tattggctgg aaaatgtcgc
8761 tcaagttcga gtatatctag aaatctcatc agaatttagg tatagcaacg tcaagctgga
8821 agaaggcagc attgggttat ttatctctca atctggcgaa actgcagata ccatagaagc
8881 gctgcgttat gcgaaatcac agaagcaaac aatcataagt ataactaata catttagcag
8941 cagcattgaa aagatctcag atattgtgtt acatactctt gctgggccag aaattggtgt
9001 tgcttcaaca aaaacctttt ctgcgcaact tgcaacttta gcatgctttg ccgtggagct
9061 tggaaaaata aaagggtatac tgggtggaga gagaataaaa cagctaagca gtgctatcaa
9121 ttctattccc gagtatgttg agcacgtttt gaatgtgatg aaaatacaac atatatcggt
9181 cagtatatta gaacacaata acgttatttt aatcggcaga ggaagttcat acggagttgc
9241 aatggaaggc gcattgaaaa taaaagagct ttcatatatc aatacaactg gtattgcagc
9301 gggagaaatg aagcatgggt ctattgcttt aatagactct actgtgcttg ttatagcaat
9361 tatcccttat gatgatttat tctttaaaac gctatctaata atacaagaga ttattgcaag
9421 aaaaggcaaa gtaattgcct tcagtataaa acaaggagcg ccattcctaa ggggagtttg
9481 cgagatgtg gtgcaacttc cagacactga taattttatc tctccaatca tctacagtgt
9541 tgctatgcaa ttccttgctt actttactgc agcaaaaaaa gggttagatg cagattgtcc
9601 aagaaattta gctaagtctg tcacggttga gtagtccatt taaagttaaa gctaaacttc
9661 taataaggta accagactgc attctgtgat ttttagcaaa acacgataca caatcgtcat
9721 tccgctacta

```

//

```

LOCUS      JAQZAU010000119          3029 bp    dna        linear    ENV 17-MAR-2023
DEFINITION MAG: Wolbachia pipientis isolate wEsol contig_56709, whole genome
            shotgun sequence.
ACCESSION  JAQZAU010000119  JAQZAU010000000
VERSION    JAQZAU010000119.1
DBLINK     BioProject: PRJNA929258
            BioSample: SAMN33142973
KEYWORDS   WGS; ENV; Metagenome Assembled Genome; MAG.
SOURCE     Wolbachia pipientis (insect metagenome)
ORGANISM   Wolbachia pipientis
            Bacteria; Pseudomonadota; Alphaproteobacteria; Rickettsiales;
            Anaplasmataceae; Wolbachieae; Wolbachia.
REFERENCE  1 (bases 1 to 3029)
AUTHORS    Fiutek,N., Couger,B.M., Roy,S., de la Torre,J.R. and Connor,E.F.
TITLE      Genomic assessment of the contribution of the Wolbachia
            endosymbiont of Eurosta solidaginis to gall-induction
JOURNAL    International Journal Molecular Sciences

```

REFERENCE 2 (bases 1 to 3029)

AUTHORS Fiutek,N., Couger,B.M., Roy,S., de la Torre,J.R. and Connor,E.F.

TITLE Direct Submission

JOURNAL Submitted (10-FEB-2023) Biology, San Francisco State University, 1600 Holloway Ave, San Francisco, CA 94132, USA

COMMENT ##Genome-Assembly-Data-START##  
Assembly Date :: JUN-2019  
Assembly Method :: FLYE v. 06-2019  
Genome Representation :: Full  
Expected Final Version :: Yes  
Genome Coverage :: 100.0x  
Sequencing Technology :: Illumina HiSeq; PacBio Sequel  
##Genome-Assembly-Data-END##

FEATURES

source Location/Qualifiers  
1..3029  
/organism="Wolbachia pipientis"  
/mol\_type="genomic DNA"  
/submitter\_seqid="contig\_56709"  
/isolate="wEsol"  
/isolation\_source="galls on Solidago altissima"  
/host="Eurosta solidaginis MN-2018-EFC"  
/db\_xref="taxon:955"  
/environmental\_sample  
/country="USA: Cowling Arboretum, Carleton College, Northfield, MN"  
/lat\_lon="44.48 N 93.13 W"  
/altitude="280 m"  
/collection\_date="2018-11"  
/metagenome\_source="insect metagenome"  
/note="metagenomic"

gene complement(<1..369)  
/locus\_tag="wEsol\_01398"

CDS complement(<1..369)  
/locus\_tag="wEsol\_01398"  
/codon\_start=1  
/transl\_table=11  
/product="hypothetical protein"  
/pfam="Pfam-B\_19625"  
/translation="MSILTQSGRAAIAASIKEQPIHLAWGSGDSTWESSYKVEKTFTA  
GGKISLDHHTIKDVKVYTGQTIYQSSIDYIVDGSSGAIERVENGAIIADSVITIEYTQ  
DTPPELITSATLIKEVGRRVV"  
/besthit="qcoverage 100 , hcoverage 53.9473684210526 ,  
similarity 100 , identity 100 , evalue 5.27e-78 ,  
alnlength 123 , Bacteria , Proteobacteria ,  
WP\_141457044.1 hypothetical protein [Wolbachia  
endosymbiont of Carposina sasakii]"

gene complement(390..1607)  
/locus\_tag="wEsol\_01399"

CDS complement(390..1607)  
/locus\_tag="wEsol\_01399"  
/codon\_start=1  
/transl\_table=11  
/pfam="Pfam-B\_16372 Tail\_P2\_I"  
/fullproduct="qcoverage 100 , hcoverage 100 , similarity  
100 , identity 100 , evalue 4.22e-306 , alnlength 405 ,  
Bacteria , Proteobacteria , WP\_012673240.1 MULTISPECIES:  
phage tail protein [Wolbachia]"  
/translation="MILPPNASKQEQLTIDIINYSLDANSLRGFKFNPQTEMLPWLVA  
EYGLGEILSWGKKATKSALKKEWVLAKQNGIRFQRLRGTPQSLKMALKWANIDNITIQE  
EPPGEHFAEFQIGISDVPNDFFVDSVIALAKLSAPARSRLMRIFNDYYNAQRFMLDES

```

IFGDLSDYSGVRIAKEGPVLSFGRKNSFELKIGNPRFKFSTFRSHYDRSYSNDLYRL
DVAVLGETEPHTKNYNGIYERSHEWYNLKALYPLPQGLLPEIKFAKALIVLSDSWNLG
DINACFAPTAYKEIEHTFYLSSEDKLSEQIWNFR RTPILERFSITYYYEAKSFTDQR II
ESNLREYHIDCQNDSDLKQKDPIHELENYVAVFYPMVTWHEHRHLNRPWKNFEPIIT
KKLDVFSTNLVYI"
/product="phage tail
protein"
/besthit="qcoverage 100 , hcoverage 100 , similarity 100
, identity 100 , evalue 4.22e-306 , alnlength 405 ,
Bacteria , Proteobacteria , WP_012673240.1 MULTISPECIES:
phage tail protein [Wolbachia]"
gene complement(1614..2411)
/locus_tag="wEsol_01400"
CDS complement(1614..2411)
/locus_tag="wEsol_01400"
/codon_start=1
/transl_table=11
/fullproduct="qcoverage 100 , hcoverage 100 , similarity
100 , identity 99.6 , evalue 2.49e-182 , alnlength 265 ,
Bacteria , Proteobacteria , WP_141457042.1 baseplate
J/gp47 family protein [Wolbachia endosymbiont of
Carposina sasakii]"
/cog="COG3948 COG3948 306 Phage-related baseplate
assembly protein"
/pfam="Baseplate_J"
/product="baseplate J/gp47 family protein"
/translation="MKTPNIVETLKFEEIFSRMKEELVRRNASFSALTESDPAIKILE
VAAWRELLLRQRINDAAQANLLAFARGNDLDHLAEFYGVLRKESENDEF LRKRVKAKI
VGWSTAGSKEHYRYHALSADTRVKDAQVVSPIPGSVQISILSTENDGVPSEELLEIVR
NHVIRDDIRVLTDTLTVIGCGIIPITIHAKVHIYPTASKDVIEVAKEQFIKGLESTKG
LGWNVTRSWIIAHLFTEGIQNIELTEPIEDIIVQNNECVALSDLVR"
/besthit="qcoverage 100 , hcoverage 100 , similarity 100
, identity 99.6 , evalue 2.49e-182 , alnlength 265 ,
Bacteria , Proteobacteria , WP_141457042.1 baseplate
J/gp47 family protein [Wolbachia endosymbiont of
Carposina sasakii]"
gene complement(2421..2756)
/locus_tag="wEsol_01401"
CDS complement(2421..2756)
/locus_tag="wEsol_01401"
/codon_start=1
/transl_table=11
/fullproduct="qcoverage 100 , hcoverage 100 , similarity
100 , identity 100 , evalue 8.00e-72 , alnlength 111 ,
Bacteria , Proteobacteria , WP_015588498.1 MULTISPECIES:
GPW/gp25 family protein [Wolbachia]"
/cog="COG3628 COG3628 116 Phage baseplate assembly
protein W"
/pfam="DUF2634 GPW_gp25"
/product="GPW/gp25 family
protein"
/translation="MRGMNSETGKTISGIEHLKQSIVDILTTPIGARVMRRDYGSRLF
ELIDHPIVPGFAQELYAAVAEAELEKWERRFKLRVQITEIKEGKVTLILEGIYLPNGK
PIRLDGIIV"
/besthit="qcoverage 100 , hcoverage 100 , similarity 100
, identity 100 , evalue 8.00e-72 , alnlength 111 ,
Bacteria , Proteobacteria , WP_015588498.1 MULTISPECIES:
GPW/gp25 family protein [Wolbachia]"
gene complement(2762..>3029)
/locus_tag="wEsol_01402"

```

CDS complement(2762..>3029)  
 /locus\_tag="wEsol\_01402"  
 /codon\_start=1  
 /transl\_table=11  
 /product="hypothetical protein"  
 /pfam="PAAR\_motif DUF4150 PAAR\_motif"  
 /translation="LGKGMNKS VVRLGDHYEEALPHFCISGSRDVFINGRPVCRQGD  
 LSEGVMTQGS KAVFANSKAIARTGDLISCGAVAEQGSNDVFAG"  
 /cog="COG4104 COG4104 98 Uncharacterized conserved  
 protein"  
 /besthit="qcoverage 55.6818181818182 , hcoverage  
 58.3333333333333 , similarity 98.0 , identity 98.0 ,  
 eval 1.55e-26 , alnlength 49 , Bacteria;Viruses ,  
 Proteobacteria;Uroviricota , WP\_007548996.1 MULTISPECIES:  
 PAAR domain-containing protein [unclassified Wolbachia]"

ORIGIN

```

1 aacaacacga cgtccaactt ccttaattaa tgttgcagaa gtaattagtt cgggtggtgt
61 gtcttgagta tactctatag tgattacgct atctgctata attgcacccat tttctacacg
121 ctcaatagcg cctgagctac catcaactat ataactctatg cttgactgat aaattgtttg
181 ccctgtataa actttttacat ctttaataagt gtggtgatct aaacttatct tgccgcctgc
241 tgtaaaagtt ttttcaactt tgtagctgct tcccagga gaactctccag atccccaagc
301 aagatgtatt ggttgctctt ttatgctcgc agcaatagct gctctgcctg attgtgtcag
361 tattgacatg tctgattgcg tgattgatat tatatatata caagattcgt agaaaaaacg
421 tccaatTTTT ttgtaataat gggctcaaaa tttttccaag ggcgatttaa gtggcgatgt
481 tcatgccaaG tgaccatacc tgggtaaaat actgctacgt aattttctag ctcatgaata
541 ggatctttct gttttaaatc tgagtcattt tgacaatcaa tatgatattc ccttaaatta
601 gactctatta ttctttgatc agtaaaactc tttgcttcgt agtaataagt tatactaaac
661 cgctctaaaa ttggtgtacg tcgaaaattc caaatctgct cagagagttt atcttcactt
721 aagtaaaatg tatgctctat ttctttataa gcagttggtg caaaacaagc attgatatct
781 cccaaattcc aactatctga taatactatc aacgctttag caaacttaat ttctggcaat
841 aaaccctgtg gtagaggata tagtgctttt aagttataacc actcgtgact tctttcatat
901 ataccgttgt aattcttggt gtgaggctct gtctctccta atactgcaac atccaaccta
961 tataaatcat tactgtaact tctatcataa tgtgatctaa aagtgctaaa tttaaatctt
1021 ggattttccta ttttttagctc aaatgagttt tttcttccaa acgataatac tggcccttct
1081 tttgctattc ttacaccgga gtagtctgaa agaagatctc caaaaatact ttcatctaac
1141 ataaaccgct gagcattgta atagtcattg aatattcgca ttaatcgaga tcttgccggt
1201 gcagaaagtt ttgccagagc aattacacta tcgacaaaaa aatcattagg aacatcagag
1261 atgccaatTT gaaattcagc aaaatgctct cctggtggtt cttcttgaat ggtaatatta
1321 tcaatgtttg cccatttcag cgccatcttc agtgactgtg gtgtaccgcg caaacgttga
1381 aatcttattc cgttttgctt agctaagacc cattctttta atgcactctt agtagctttc
1441 ttaccccagg ataaaatttc tcccagccg tattccgcta ctagccacgg caacatttca
1501 gtctgtgggt taaattttaa tccccgtaga gaatttgcac caagagaata attaattatg
1561 tctgtaagta tttgctcttg ctttgaagca tttggaggaa gtatcaccaa tttttaccta
1621 acacttaaat cacttaaagc aacgcattca ttattttgta caattatgtc ttctattggc
1681 tctgtaagct ctatatTTTt tataccttct gtaaaaagat gagcaataat ccaggacctg
1741 gttacattcc accctaaacc tttagtagac tcaagacctt tgataaattg ttcctttgca
1801 acttcgataa catcttttga tgcagtaggg taaatatgca ctttagcatg aatagtaatg
1861 ggaataatac cacagccaat aactgtaagc gtatctgtta atacacgaat atcatcgca
1921 ataacgtgat ttctgacgat ctctagcaat tcttctgaag gtactccatc attttctgtg
1981 gaaagtattg aaatctgtac acttcctggt atagggtgata ccacttgcgc atcttttact
2041 cttgtgtcag cagataatgc atgatagcga taatgctctt tactccctgc tgttgaccaa
2101 ccaacaattt tggtttttac ccgcttcctt aagaattcat cattctctga ctctttctc
2161 agcacaccat aaaattcagc caagtgatca aggtcattac ctcttgcaaa agcaagtaaa
2221 tttgcctgtg ctgcatcatt aatcctttgc ctgagcaaaa gttcacgcca ggctgtact
2281 tccagtatct ttattgctgg atcactttca gttagtgcag aaaaacttgc attccgacgc
2341 actaactctt ctttcattcg cgaaaagatt tcctcaaatt ttaatgtttc gacaatattt
2401 ggtgttttca tcctactacc ttatactata ataccatcaa ggcggatcgg ctttccattt
2461 ggagatagaa ttccttctaa aatgagagtt actttacctt cttttatttc tgttatttgt
2521 acacgtttta gcttaaatcg acgctccac ttttctaatt cttctgcaac tgctgcataa
2581 agctcttgtg caaaaccagg tacaattgga tgatcaatca gctcaaataa ccttgatcca

```

```

2641 taatctcggc gcataacacg agcaccaatt ggtgtagtta aaatatcaac tattgattgt
2701 tttaaagtct ctataccact tattgtttta ccagtttcag aattcatacc acgcatatca
2761 cttaccctgc aaagacatca ttgcttcctt gttctgccac tgctccacag gaaattaggt
2821 caccagtacg agcaatcgct ttgctatttg caaacactgc tttcgaccct tgagtcatta
2881 cttttccttc actcaaacta tctccttgcc tacagacagg tcttcggttt ataaatacat
2941 ctctgcttcc acttatacaa aaatgcggca acgcttcttc atagtgatct cctaggcgta
3001 caactgattt attcattcct ttcctaat

```

//

```

LOCUS      JAQZAU010000120          12663 bp    dna        linear    ENV 17-MAR-2023
DEFINITION MAG: Wolbachia pipientis isolate wEsol contig_57018, whole genome
            shotgun sequence.
ACCESSION  JAQZAU010000120  JAQZAU010000000
VERSION    JAQZAU010000120.1
DBLINK     BioProject: PRJNA929258
            BioSample: SAMN33142973
KEYWORDS   WGS; ENV; Metagenome Assembled Genome; MAG.
SOURCE     Wolbachia pipientis (insect metagenome)
ORGANISM   Wolbachia pipientis
            Bacteria; Pseudomonadota; Alphaproteobacteria; Rickettsiales;
            Anaplasmataceae; Wolbachieae; Wolbachia.
REFERENCE  1  (bases 1 to 12663)
AUTHORS    Fiutek,N., Couger,B.M., Roy,S., de la Torre,J.R. and Connor,E.F.
TITLE      Genomic assessment of the contribution of the Wolbachia
            endosymbiont of Eurosta solidaginis to gall-induction
JOURNAL    International Journal Molecular Sciences
REFERENCE  2  (bases 1 to 12663)
AUTHORS    Fiutek,N., Couger,B.M., Roy,S., de la Torre,J.R. and Connor,E.F.
TITLE      Direct Submission
JOURNAL    Submitted (10-FEB-2023) Biology, San Francisco State University,
            1600 Holloway Ave, San Francisco, CA 94132, USA
COMMENT    ##Genome-Assembly-Data-START##
            Assembly Date          :: JUN-2019
            Assembly Method        :: FLYE v. 06-2019
            Genome Representation   :: Full
            Expected Final Version :: Yes
            Genome Coverage        :: 100.0x
            Sequencing Technology   :: Illumina HiSeq; PacBio Sequel
            ##Genome-Assembly-Data-END##
FEATURES   Location/Qualifiers
            source                1..12663
                                   /organism="Wolbachia pipientis"
                                   /mol_type="genomic DNA"
                                   /submitter_seqid="contig_57018"
                                   /isolate="wEsol"
                                   /isolation_source="galls on Solidago altissima"
                                   /host="Eurosta solidaginis MN-2018-EFC"
                                   /db_xref="taxon:955"
                                   /environmental_sample
                                   /country="USA: Cowling Arboretum, Carleton College,
                                   Northfield, MN"
                                   /lat_lon="44.48 N 93.13 W"
                                   /altitude="280 m"
                                   /collection_date="2018-11"
                                   /metagenome_source="insect metagenome"
                                   /note="metagenomic"
            gene                  40..321
                                   /locus_tag="wEsol_01403"
            CDS                   40..321
                                   /locus_tag="wEsol_01403"
                                   /codon_start=1

```

```

/translation=11
/fullproduct="qcoverage 100 , hcoverage 100 , similarity
98.9 , identity 98.9 , evalue 1.51e-63 , alnlength 93 ,
Bacteria , Proteobacteria , CDR78524.1 hypothetical
protein WPAU_0128 [Wolbachia endosymbiont of Drosophila
simulans wAu]"
/translation="MLRWHIEECYKRLKVGAELENFSGEAVLQEFWANLVMCNILSLH
MCDAQGPWNPDQITEYRLNFSVLFQVLRQKLYQVLIAPKNFQALFKYTR"
/product="hypothetical protein"
/besthit="qcoverage 100 , hcoverage 100 , similarity 98.9
, identity 98.9 , evalue 1.51e-63 , alnlength 93 ,
Bacteria , Proteobacteria , CDR78524.1 hypothetical
protein WPAU_0128 [Wolbachia endosymbiont of Drosophila
simulans wAu]"
gene complement(540..3680)
/locus_tag="wEsol_01404"
CDS complement(540..3680)
/locus_tag="wEsol_01404"
/codon_start=1
/translation=11
/pfam="Pro_dh Aldedh"
/fullproduct="qcoverage 100 , hcoverage 100 , similarity
100 , identity 99.8 , evalue 0.0 , alnlength 1046 ,
Bacteria , Proteobacteria , WP_015588840.1 MULTISPECIES:
bifunctional proline dehydrogenase/L-glutamate
gamma-semialdehyde dehydrogenase PutA [unclassified
Wolbachia]"
/translation="MISSIQEPNELRKRLQGFYRTDEKSYIRYLVEKAELSADSKNRI
YNIKQVIEKIKHNKLSIVDSFMQQYSLSNDEGIALMCLAESLLRIPDDYTIDELIKD
KIANQEWSKYLYGSSSLFVNASTWSLMIGSSILRDNEGDSKFYYAISKLLKNLGEPII
RKAVKQAMSILGNHFVVGETIEEALRYAKLDDNSKFLYSFDMLGAAHTAEDAEEYFN
SYMHSIKAIGESTEINDCFKSHGISIKLSALHPCYKFSQFDRIAGEIFTKVLELCREA
KKYNISLCIDAEESERLEISLILFEQLRLDESLSEWEGGLAVQAYQKSALSVLDFVE
DVAIRSKHKIMLRLVKGAYWDSEIKRTQELGLNDYSVFTRKSYTDVSYLVCAQKLLSK
PNSFYPCFGTHNVYTFASIMELADKNHPGFEFQRLHGMADLYDYAMSELATNVSCRV
YAPVGEHSDLLPYLIRRLLENGANSSSVNQISDPNVKIDELISDPLEKAINFNYPHP
GIPLPDILGPERKNSLGMDSISVIVSQFADDIKGFSEKKWQVGPIIDGKALFDSAE
FIEVVNPAHLENVIGEVSNTTSVQALNALEIAHNAFTWQNVSAVERAKCLEKAADLL
EERMKELIYILIVEAGKILSDAIAEVREAVDFLRYATIKNELSDWRKLPGPTGEDN
FIFFEGRGVFLCISPWNFPLAIFIGQVSAALAAGNAVLAKPAEQTPIIAYEAVKILHE
AGISKNVLHLIPGDGGYLGKILVPDNRISGVAFTGSTQTAQIINRMLANRDGPVPIFI
AETGGLNAMIVDSSALLEQVTTDVLLSAFRSAGQRCSALRVLFIQEDIAEKQIKMICG
AAQELKIGDPIQLSTDIGPIIDKASIDMLTQHTQKMSSEDKDSNLLFKVPMDTNSHNGY
FFPPYIYEIQKISQLKQEVFGPIIIRFNKSQLNEVISDINSTGYGLTFSLQSRIQS
QIDTISKKISVGNVYINRNQIGAAVGIQPFGRGLSGTGPKAGGPHYLQRFSTEKVVS
VNTTAFGGNTTLMCLD"
/product="bifunctional
proline dehydrogenase/L-glutamate gamma-semialdehyde
dehydrogenase PutA"
/besthit="qcoverage 100 , hcoverage 100 , similarity 100
, identity 99.8 , evalue 0.0 , alnlength 1046 , Bacteria
, Proteobacteria , WP_015588840.1 MULTISPECIES:
bifunctional proline dehydrogenase/L-glutamate
gamma-semialdehyde dehydrogenase PutA [unclassified
Wolbachia]"
gene complement(3815..6400)
/locus_tag="wEsol_01405"
CDS complement(3815..6400)
/locus_tag="wEsol_01405"
/codon_start=1

```

```

/transl_table=11
/fullproduct="qcoverage 100 , hcoverage 100 , similarity
100 , identity 100 , evaluate 0.0 , alnlength 861 ,
Bacteria , Proteobacteria , WP_141456811.1 MULTISPECIES:
aconitate hydratase AcnA [unclassified Wolbachia]"
/cog="AcnA COG1048 861 Aconitase A"
/pfam="Aconitase Aconitase_C"
/tigr="TIGR01341 aconitase_1 876 aconitate hydratase 1"
/product="aconitate
hydratase AcnA"
/translation="MNNSLNAKTTLNIDGKSYNYFSLSSASEFLGTDVTKLPCSLKVL
LENLLRNEDGVNVKLDDIRVLADCVNKHNTHEISYKPARVLMQDFTGVPVVDLASMR
SYVKKNGGSPSNINPSVPVDLVIDHSVQVDSYGSVSAFSKNVELEVKNRLERYQFLKW
GESSFTNFRVPPGTGICHQVNLEYLAQVVCNNDGVIYPDTLVGTDSTHTMINGLSVL
GWGVGGIEAESVMLGQPISMVIEVVGFKLIGRLSEGVTATDLVLTVTNLRKGVVG
KFVEFYGDGLDYLADLADRATIANMAPEYGATCGFFPIDQKTLDYLSLTGRPEKLIKLV
EAYAKEQGLWRSNNELAFFDTLELDLSSVKPVMAGPKRPQDKVFLSQVAESFSKFSV
NESKENDKLQDGSVVIAAITSTNTSNPSVMIAAGLVARNAIKLGKSKPWVKTSLAP
GSQVVTEYLEKSGLQVDLNLALGFNLVGYGCTTCIGNSGPLNKDIEDGIKNKNLTVAAV
LSGNRNFEGRIHPLVKANYLASPPLVVAYALAGTVQIDLTKDSICKDKNGNDVYLKDI
WPTNNEIEDCVKSVVTREMFQKYKDVFSGDEHWRKIKCEKSEIYNWDANSTYIQNPP
YFDNLSPKNNKIDIKGAQILAMFGDSVTTDHISPAGNIASSSPAGIYLNKLGIEPQDF
NSYGSRRGNHNVMRGTFANIRIKNEMVSIIEGGYTKYIPSQETMSIFDAAMRYKEALI
IVAGKEYGTGSSRDWAAKGTLGLGVKVIAESFERIHRNLVGMGVLPFLIFQNGITRK
IFDGSEVISIKGEIVPGGNLECIIRKDNSKQSIQLKCCVQTATETKYLTCGGVLSYI
LAQSF"
/besthit="qcoverage 100 , hcoverage 100 , similarity 100
, identity 100 , evaluate 0.0 , alnlength 861 , Bacteria ,
Proteobacteria , WP_141456811.1 MULTISPECIES: aconitate
hydratase AcnA [unclassified Wolbachia]"
gene complement(6415..6918)
/locus_tag="wEsol_01406"
CDS complement(6415..6918)
/locus_tag="wEsol_01406"
/codon_start=1
/transl_table=11
/fullproduct="qcoverage 100 , hcoverage 100 , similarity
99.4 , identity 99.4 , evaluate 2.45e-111 , alnlength 167 ,
Bacteria , Proteobacteria , WP_006279761.1 MULTISPECIES:
protein-export chaperone SecB [Wolbachia]"
/cog="SecB COG1952 157 Preprotein translocase subunit
SecB"
/pfam="SecB"
/tigr="TIGR00809 secB 140 protein-export chaperone SecB"
/product="protein-export
chaperone SecB"
/translation="MPQQKMRIHGQYVKDLSEFNPNSPFLSSSKATDINVMVNINSAK
LEGTKNKEEVNEEKSFHEITLHIEVKATVKDEGIKDGVAFICETKYCGIFSIENTLKE
SEEEVRQALFIGGPTFLFPFAREIIARVTSSGGFPPLMLDPIDFETMYEQQQQQKSN
GSNSNFN"
/besthit="qcoverage 100 , hcoverage 100 , similarity 99.4
, identity 99.4 , evaluate 2.45e-111 , alnlength 167 ,
Bacteria , Proteobacteria , WP_006279761.1 MULTISPECIES:
protein-export chaperone SecB [Wolbachia]"
gene 7083..7733
/locus_tag="wEsol_01407"
CDS 7083..7733
/locus_tag="wEsol_01407"
/codon_start=1
/transl_table=11

```

```

/fullproduct="qcoverage 100 , hcoverage 100 , similarity
100 , identity 100 , evalue 3.41e-142 , alnlength 216 ,
Bacteria , Proteobacteria , WP_015588838.1 MULTISPECIES:
Tim44/TimA family putative adaptor protein [unclassified
Wolbachia]"
/pfam="Tim44 Pfam-B_10825"
/tigr="TIGR00984 3a0801s03tim44 376 mitochondrial import
inner membrane, translocase subunit"
/product="Tim44/TimA family
putative adaptor protein"
/translation="MIELVIYALLAAAFIFSRLYNSLGRSANLNLKKLTNVLDVSRRE
DVVENIEGYIDSNSENSIKFTYKQILKKNKDFSISHFIEGSSIAFELIKCFNQNL
QLKPLLDKLDYDNFAEKIKHRKEVHESIIVSIVSQKILEIKLVKNAVFIIVYFLSEQI
NFVKNNKGDIIISGSTSTINKVEDVWQFKKNVNSSDPSWLLVSIHYKKTNDKTNDK"
/besthit="qcoverage 100 , hcoverage 100 , similarity 100
, identity 100 , evalue 3.41e-142 , alnlength 216 ,
Bacteria , Proteobacteria , WP_015588838.1 MULTISPECIES:
Tim44/TimA family putative adaptor protein [unclassified
Wolbachia]"
gene 7751..8446
/locus_tag="wEsol_01408"
CDS 7751..8446
/locus_tag="wEsol_01408"
/codon_start=1
/transl_table=11
/fullproduct="qcoverage 100 , hcoverage 100 , similarity
100 , identity 100 , evalue 1.40e-162 , alnlength 231 ,
Bacteria , Proteobacteria , WP_015588837.1 MULTISPECIES:
DNA polymerase III subunit epsilon [unclassified
Wolbachia]"
/cog="DnaQ COG0847 243 DNA polymerase III, epsilon
subunit and related 3'-5' exonucleases"
/pfam="RNase_T RNase_H_2 DNA_pol_A_exo1"
/tigr="TIGR01406 dnaQ_proteo 231 DNA polymerase III,
epsilon subunit"
/product="DNA polymerase III
subunit epsilon"
/translation="MESKLREIVLDTETTGLDTESGHRIIEIGCVELINRIPTGKVFH
RYLNPERDIPYHSFKIHGISEEFLEDKPLFSNVALEFLDFISNDILVIHNAEFDVKFL
NMELSKLNAGLISSDRVLDLPLARKKFAGSPASLNALCKRFDISLENRELHGALVDA
QLLAKVYVELTGGLQTFLLFDNQCNQDSNSTFVQHKVRNLTPREHSPNSEEIDEHKLL
DKINNTLWKNKYIE"
/besthit="qcoverage 100 , hcoverage 100 , similarity 100
, identity 100 , evalue 1.40e-162 , alnlength 231 ,
Bacteria , Proteobacteria , WP_015588837.1 MULTISPECIES:
DNA polymerase III subunit epsilon [unclassified
Wolbachia]"
gene 8491..9099
/locus_tag="wEsol_01409"
CDS 8491..9099
/locus_tag="wEsol_01409"
/codon_start=1
/transl_table=11
/fullproduct="qcoverage 100 , hcoverage 100 , similarity
100 , identity 100 , evalue 4.38e-138 , alnlength 202 ,
Bacteria , Proteobacteria , WP_015588836.1 MULTISPECIES:
SCO family protein [unclassified Wolbachia]"
/cog="COG1999 COG1999 207 Uncharacterized protein
SCO1/SenC/PrrC, involved in biogenesis of respiratory and
photosynthetic systems"

```

```

/pfam="Pfam-B_7536 SCO1-SenC AhpC-TSA"
/product="SCO family
protein"
/translation="MVRFIRLLSNVLAALAVVFLGYCYFTKKGIFAPAAIHNAEVKIG
GDFS LINQDQGILRSSDFKDKYMMIFFGFSSCKRICPMNLGIISETLARLDEKTNNKL
QTFFITVDPERDSTERLKEFQQQFDHRIQMLTGEREKIDEVI AKYKVYASKVGEEEI
NHSSIMYLIGPGGKYVTHFAADLNSDESQSDKILAEIRKYVN"
/besthit="qcoverage 100 , hcoverage 100 , similarity 100
, identity 100 , eval ue 4.38e-138 , alnlength 202 ,
Bacteria , Proteobacteria , WP_015588836.1 MULTISPECIES:
SCO family protein [unclassified Wolbachia]"
gene 9316..11703
/locus_tag="wEsol_01410"
CDS 9316..11703
/locus_tag="wEsol_01410"
/codon_start=1
/transl_table=11
/fullproduct="qcoverage 100 , hcoverage 100 , similarity
100 , identity 100 , eval ue 0.0 , alnlength 795 ,
Bacteria , Proteobacteria , WP_141456810.1 MULTISPECIES:
DNA topoisomerase (ATP-hydrolyzing) subunit B
[unclassified Wolbachia]"
/cog="GyrB COG0187 635 Type IIA topoisomerase (DNA
gyrase/topo II, topoisomerase IV), B subunit"
/pfam="HATPase_c HATPase_c_3 Pfam-B_8202 DNA_gyraseB
Toprim DNA_gyraseB_C"
/tigr="TIGR01059 gyrB 639 DNA gyrase, B subunit"
/product="DNA topoisomerase
(ATP-hydrolyzing) subunit B"
/translation="MENSYNADA IKILRGLDAVRKRPGMYIGD TDDGSGLHHMVYEVV
DNAIDESLAGYCDKIEVSINKDGSVSVTDNGRGIPTDIHEEEGISAAEVIMTQLHAGG
KFDSNTYKVS GGLHGVGISVVNALSSWLELTIWRNKKEHFMR FEDGESIEPLKV V NEN
TNKRGTKVTFMPSTETFNGINFSYSTLESRIRELAFLNSNIDITLRDLRNEPYTESHF
NQSNQSKDNFGTANFVQYLDKNKTHVTKIASMKG DADDLGISLEISMEWNDSYYENML
CFTNNIRQRDGGTHLAGFRSALTRCINTYATNEGFLKKAKVNLTGEDVREGLTCVLSL
KMPDPKFSSQTKDKLVSSEARAVVESIVSDKLSTILETDPKLAASIVERAIRSAKGRE
AARKARELVKSKNNIDIATLPGLKADCQEKAPELSELFIVEGNSAGGTAKQGRNRKTQ
AVLALRGKILNVERVSLDRIFSSAEIGSLITAIGAGIGSEHFDIEKARYHKI IIMTDA
DVDGSHIRTLILTFFFRHMREVIEKGYLYIAQPPLYKVTKNAKDTYIKDDETFEEYII
NSAVKRLTL SGTATEFN DLRLILNKCVSISNISKNYDREIPQNLLESLLILSKKNALS
SADEILKYLKLMYSEYTWEVEIKDEEKEIHISKLFQGLADKYIFALSMLE GKDMQSIL
SLLDGISNLFNGDSFLKSQETEIRITSPSTLAKIIMDYGKKGLTLQRFKGLGEMNADQ
LWDTTLNPEARTLLKVEIKDCEEADSIFSILMGDIVEPRRDFINSNALNVHDVDI"
/besthit="qcoverage 100 , hcoverage 100 , similarity 100
, identity 100 , eval ue 0.0 , alnlength 795 , Bacteria ,
Proteobacteria , WP_141456810.1 MULTISPECIES: DNA
topoisomerase (ATP-hydrolyzing) subunit B [unclassified
Wolbachia]"
gene 12234..12413
/locus_tag="wEsol_01411"
CDS 12234..12413
/locus_tag="wEsol_01411"
/codon_start=1
/transl_table=11
/fullproduct="qcoverage 100 , hcoverage 100 , similarity
100 , identity 100 , eval ue 5.36e-33 , alnlength 59 ,
Bacteria , Proteobacteria , EAL59452.1 IS630-Spn1,
transposase Orf1, putative [Wolbachia endosymbiont of
Drosophila ananassae]"
/cog="COG3415 COG3415 138 Transposase and inactivated

```

derivatives"  
 /pfam="HTH\_Tnp\_IS630 HTH\_23 HTH\_28 HTH\_29 CENP-B\_N HTH\_7"  
 /product="IS630-Spn1, transposase Orf1,  
 putative"  
 /translation="MPAAYSIDLRRKKAMEALDEGESRATVAKRFGKIGKTTLYEWQKRR  
 EETGDFQSKKPGSVA"  
 /besthit="qcoverage 100 , hcoverage 100 , similarity 100  
 , identity 100 , eval 5.36e-33 , alnlength 59 ,  
 Bacteria , Proteobacteria , EAL59452.1 IS630-Spn1,  
 transposase Orf1, putative [Wolbachia endosymbiont of  
 Drosophila ananassae]"

# ORIGIN

|      |            |            |            |            |             |             |
|------|------------|------------|------------|------------|-------------|-------------|
| 1    | aaacagagtt | tttgaccgag | acttttgagc | aaagcttatg | tgttaaggtg  | gcacatagag  |
| 61   | gagtgcata  | aacgactcaa | agtaggagca | gagttagaga | atctttcttg  | agaggctgta  |
| 121  | ttacaagaat | tttgggcaaa | cttggtcatg | tgcaatatat | tatcgcttca  | tatgtgtgat  |
| 181  | gcacaagggc | cttgaacccc | agatcaaatt | actgagtatc | gtttaaattt  | ttcagtttta  |
| 241  | tttgggtgaa | tgaggcagaa | actctatcag | gtacttattg | cgccaaaaaa  | ctttcaagcc  |
| 301  | ctttttaagt | atacgcgcta | aagttaaaat | ccgaccggga | cagccgcaat  | aaagtagata  |
| 361  | agcctaaacg | ccatcatgtc | tttaggagag | tttgctaatt | aaagttctta  | agttgacgtc  |
| 421  | attggctgaa | cggatacgat | ttatttcagt | gcatgagctg | gtccttttct  | gatttttagcg |
| 481  | ctgtgtacat | aactgcacga | acgtctagtt | taggggtaag | aaaaattagg  | gcccgcgaat  |
| 541  | taatccaaac | acataagtgt | agtgttacca | ccaaatgctg | tagtggttaac | acttacaact  |
| 601  | ttttctgtag | aaaaacgctg | taaataatga | ggaccaccag | cttttggtccc | agtgccagat  |
| 661  | agtcctctac | caccaaattg | ttgtatccca | actgctgcac | ctatctgggt  | acggttgatg  |
| 721  | tagacatttc | caactgatat | ttttttactt | atagtgtcaa | tttgactttg  | tatacgactc  |
| 781  | tgcaaagaaa | acgtaagccc | atatccagta | ctatttatat | cacttataac  | ttcatttaat  |
| 841  | tgtgacttgt | taaaacgtat | gatatgtaaa | ataggaccaa | atacttcttg  | ctttaattgc  |
| 901  | gaaatttttt | gtatctcata | aatatatgga | ggaaagaaat | aaccattatg  | agaatttgta  |
| 961  | tccatgggta | ctttaaataa | cagatttgaa | tctttatcct | ctgacatttt  | ttgcgtatgt  |
| 1021 | tgagtgcaga | tatcgataga | tgctttatca | attattggac | caatatcagt  | actaagttgt  |
| 1081 | attgggtcac | caatcttgag | ttcttgcgct | gcaccgcata | tcatttttat  | ctgcttctct  |
| 1141 | gctatgtcct | cttgaataaa | cagcactcta | agcgcagaa  | agcgttggcc  | agcgtgcga   |
| 1201 | aacgcagaaa | gcaaaacatc | cgtagtcact | tgctctaaga | gagcagagct  | atcaacaatc  |
| 1261 | atagcattta | atccgccagt | ttcagcaata | aatggcacia | taggaccatc  | cctatttgca  |
| 1321 | agcattctat | taattatttg | agcgttttgt | gttgaaccag | taaaagctac  | accggaaatt  |
| 1381 | ctattgtctg | gaactaatat | tttgccataa | tatccaccat | ccccaggaat  | gaggtgcaac  |
| 1441 | acattttttg | atatcccgag | ttcatgtagt | atcttaacag | cttcataggc  | aataatcggc  |
| 1501 | gtttgctctg | ccggtttttg | cagcactgca | ttacctgctg | caagtgcagc  | tgaaacctgc  |
| 1561 | ccaatgaaga | tagcgagcgg | aaaattccac | ggtgatatgc | ataagaaaac  | tcctctgcct  |
| 1621 | tcaaaaaaga | tgaagttatc | ttcacctgtt | ggccctggca | atctttctcc  | gtcgctcagt  |
| 1681 | tcattttttg | ctatcgttgc | gtagtaacgt | aagaaatcca | ctgcctctct  | tacttccgct  |
| 1741 | attgcatcag | ataaaatttt | tcctgcttct | acgatcagaa | tgtaaatcaa  | ctctttcatc  |
| 1801 | ctttcttcaa | gcaaactctg | agctttttca | aggcatttag | cgcgctctac  | tgctgaaaca  |
| 1861 | ttctgccatt | cagtaaaagc | attatgtgct | atttcaagag | cgtttaaagc  | ttgaacactt  |
| 1921 | gttgattttg | acacttctcc | aattacattt | tctaaatgtg | caggattcac  | tacttcgata  |
| 1981 | aattcagcac | tatcaaatag | tgctttttcc | tcaattattg | gtccaacttg  | ccactttttt  |
| 2041 | tcactaaaac | ccttttatat | atctgcaaat | tgtgagacta | tcacagaatc  | actaatatcc  |
| 2101 | attcccaaag | aattttttct | ttctggtccc | aaaatatctt | gtggtaattg  | aatgcctgga  |
| 2161 | tgaggctcat | aattaaaatt | tatagctttt | tccagtggat | ctgaaattaa  | ctcatcgatt  |
| 2221 | ttaacgttag | gatcacttat | ttgattaaca | aacgaactat | tagctccatt  | ttcaagaaga  |
| 2281 | cgtcttataa | gataaggcaa | caagtcacta | tggtccccc  | cggttgcgta  | gacacgacag  |
| 2341 | ctaacatttg | ttgcaagctc | tgacattgca | taatcatata | agtcttttgc  | cattccatgt  |
| 2401 | aagcgttgaa | attcaaatcc | agggtggttt | ttatcagcaa | gttccatgat  | agaagcaaaa  |
| 2461 | gtatagacgt | tatgagttcc | aaagcatggg | taaaagctgt | ttggttttact | caaaagtttc  |
| 2521 | tgtgcgacac | cgaggtaaga | tacgtcagta | tagctttttc | ttgtaaatac  | tgagtaatac  |
| 2581 | tttaatccca | attcttgctg | acgcttgatt | tctgaatccc | aatatgcacc  | ttttacaagc  |
| 2641 | ctcaacataa | ttttgtgctt | tgatcgagta | gcaacatctt | caacaaagtc  | aagaacagat  |
| 2701 | aaagcgctct | tttgatatgc | ttgcacagcc | aagccaagcc | cttcccactc  | agaaagtgat  |
| 2761 | tcatcaagcc | gtaattgttc | aaacaagatt | aaggaaaatt | caagcctttc  | tgattcttct  |
| 2821 | gcatctatgc | ataatgaaat | gttgtatttt | tttgcctcgc | ggcagagctc  | taaaacctta  |

|      |             |             |             |             |             |             |
|------|-------------|-------------|-------------|-------------|-------------|-------------|
| 2881 | gtgaatatct  | caccagcaat  | tcggtcaa    | tggtgaatt   | tataacatgg  | gtgtaaagca  |
| 2941 | gaaagtttga  | ttgaaattcc  | atgggattta  | aaacaatcat  | ttatttcagt  | ggattcacct  |
| 3001 | atagctttta  | ttgaatgcat  | atatgaatta  | aaataactctt | ctgcatcctc  | agctgtgtga  |
| 3061 | gcagcttcac  | caagcatatc  | aaaagagtat  | aaaaacttac  | tattgtcatc  | tagttttgcg  |
| 3121 | taccttaaag  | cttcttctat  | ggtttctcca  | acaacaaaat  | gattaccaag  | tatagacatt  |
| 3181 | gcttgtttta  | ctgctttgcg  | aatgatcggt  | tctcctaaat  | tcttaagtaa  | cttagaaatt  |
| 3241 | gcgtaataga  | acttcgaatc  | gccttcattg  | tctctcaata  | tactgctacc  | tatcattaaa  |
| 3301 | ctccacgtgg  | aagcattgac  | gaacaatgaa  | gaagaatatc  | ctaaatat    | actccattct  |
| 3361 | tgattggcaa  | ttttatcttt  | gattagctcg  | tctattgtat  | aatcatctgg  | tattctaagt  |
| 3421 | agcgattcag  | caaggcacat  | caatgctatt  | ccttcatcat  | tggaaagcga  | gtattgctgc  |
| 3481 | ataaaggaat  | ctacaatact  | taattttattg | tgtttgattt  | tttcaataac  | ttgttttgca  |
| 3541 | atattataaaa | ttctattttt  | tgaatcagcc  | gaaagctctg  | ctttttctac  | aagataacgt  |
| 3601 | atataactct  | tttcatcagt  | acgataaaa   | ccttgtaaac  | gttttctcaa  | ttcgttaggt  |
| 3661 | tcttgatatag | agcttatcat  | atataattat  | ctccaaaaaa  | tactccgaca  | ccatatgtat  |
| 3721 | ggtgaaatta  | tatcataact  | ttgcgcagag  | caaattgcta  | tttacaaagg  | gatcagggct  |
| 3781 | ggctaaaaga  | agtccatgca  | ataacttcac  | taaatcaaaa  | agattgtgca  | agtatgtagc  |
| 3841 | tcaacactcc  | accacacatc  | aagtatttag  | tctcagttgc  | ggtttgtaga  | cagcatttga  |
| 3901 | gttgaattga  | ttgctttgaa  | ttatcctttc  | ttttgatgat  | gcattctaga  | tttccacctg  |
| 3961 | gcactatttc  | accttttatg  | cttattacct  | cgctaccatc  | aaatatcttt  | ctggttattc  |
| 4021 | cattttggaa  | tataagtgga  | agaacaccca  | tgccgaccaa  | gttggaccta  | tgtatacgct  |
| 4081 | caaagctttc  | tgcaatgaca  | actttaaccc  | ccaacaataa  | agtacccttt  | gctgcccaat  |
| 4141 | ccctacttga  | acctgtgcca  | tactcctttc  | ctgccacaat  | gatgagagct  | tccttgtagc  |
| 4201 | gcattgctgc  | atcaaaaatc  | gacatagttt  | cttgagaagg  | aatatat     | gtatagccgc  |
| 4261 | cttcgatgct  | taccatttca  | ttttttattc  | taatgttagc  | aaaagtccca  | cgcatacatta |
| 4321 | cattgtgggt  | accacgacga  | gaccatacgc  | aattaaagtc  | ctgtgggtca  | attccaagat  |
| 4381 | tttttaaata  | tatacctgca  | ggactacttg  | aggcaatatt  | tccagcaggg  | gaaatgtgggt |
| 4441 | cagtggttac  | gctatcgcca  | aacattgcca  | atatttgtgc  | accttttata  | tcgattttat  |
| 4501 | tatttttagg  | tgataaatta  | tcaaaatagg  | gcggattttg  | tatgtaagtg  | ctatttgcac  |
| 4561 | ccaattata   | gatttcactt  | ttttcacact  | ttatctttcg  | ccaatgttca  | tcaccagaaa  |
| 4621 | aaacatcctt  | atacttttgt  | atgaacatct  | cacgtgttac  | cacactttta  | acacaatctt  |
| 4681 | cgatttcatt  | gtttgttggc  | catatatctt  | tgagatagac  | atcatttcca  | ttcttatctt  |
| 4741 | tgcatattga  | atcttttgtc  | agatcaattt  | gcacagtacc  | agcaagtgca  | tatgcaacaa  |
| 4801 | caagtggcgg  | agatgccaa   | taattagctt  | tgactaacgg  | atgaattctt  | ccttcaaagt  |
| 4861 | tacgattacc  | agataaaaact | gcagcaacgg  | ttaagttttt  | gttttttaatg | ccatcttcta  |
| 4921 | tatcttttatt | aagtggacca  | gaattcccaa  | tgcaagtgtg  | gcaaccatat  | ccaactaaat  |
| 4981 | taaagcccag  | agcattttaga | tctacctgca  | atccagactt  | ttctaaatat  | tctgttacaa  |
| 5041 | cttgtgaccc  | tggaagcaaga | gaagttttaa  | cccaaggctt  | tgatttttaat | ccaagttaa   |
| 5101 | ttgcattacg  | agctacaaga  | cctgcagcaa  | tcatcacact  | tggaatttgag | gtattagtgc  |
| 5161 | agcttgttat  | tgctgcaata  | actacacttc  | catcttggag  | tttatcgttt  | tcctttgact  |
| 5221 | cattaactga  | aaatgattta  | gaaaaagact  | ctgccacttg  | tgaaagaaaa  | actttatctt  |
| 5281 | gtggtctttt  | gggaccagcc  | attactggct  | tcacgcttga  | taaatcaagt  | tctagtgtgt  |
| 5341 | caaaaaatgc  | taactcatta  | ttgctacgcc  | acagtccttg  | ctctttcgca  | taagcctcaa  |
| 5401 | ctagcttaat  | cagctttttct | ggccttcggg  | ttaagcttaa  | ataatctagc  | gttttttgat  |
| 5461 | caattggaaa  | aaatccacaa  | gttgcgccat  | actccggggc  | catgtttgct  | atagtggctc  |
| 5521 | tatctgccaa  | agataaataa  | tctaaacat   | caccataaaa  | ttctacaaac  | ttaccaacaa  |
| 5581 | cgctttttgt  | tcttaggata  | ttggtaacgc  | tcagcactaa  | atcggtcgca  | gttactcctt  |
| 5641 | ccgacaatct  | gccaat      | ttaaatccaa  | ctacttctgg  | aatcaccata  | ctaattgggt  |
| 5701 | gaccaagcat  | cacagactca  | gcttctatgc  | ctccaacacc  | ccaaccaagg  | actgataacc  |
| 5761 | cgttaatcat  | tgtagtatgg  | ctgtcagtac  | caactaaagt  | atcaggatat  | atgactccat  |
| 5821 | cattattaca  | cacaacttgc  | gctaaatatt  | caagattcac  | ttggtggcaa  | atccctgtgc  |
| 5881 | caggcggcac  | tactctaaaa  | tttgtgaagg  | acgattctcc  | ccactttaaa  | aattgataac  |
| 5941 | tctccaaatt  | tctttttact  | tctaactcaa  | cattcttact  | gaatgcggaa  | acacttccat  |
| 6001 | aactatctac  | ttgaacagaa  | tggtcaatca  | caagatcaac  | cggtacagaa  | ggatttatgt  |
| 6061 | tgctcgggct  | tcctccattt  | ttcttgacat  | aactccgcat  | tgaagctaaa  | tcaacaacag  |
| 6121 | caggaacccc  | tgtaaaatct  | tgcacaaaca  | cccttgctgg  | tttatagcta  | atttcgtgat  |
| 6181 | tagtgtgttt  | attaacgcag  | tctgctagta  | ctcttatgtc  | atccagcttt  | acgtttactc  |
| 6241 | catcttcatt  | acgcaataaa  | ttttcaagca  | gcaccttaag  | tgagcagggc  | aatttagtta  |
| 6301 | catctgtccc  | taaaaattca  | ctagcactac  | ttaggctaaa  | atagttgtat  | gacttcccgt  |
| 6361 | caatgtttta  | agtcgttttt  | gcgttttaaag | aattgttcat  | cctatcacac  | tatattagtt  |
| 6421 | aaaattggaa  | ttactaccgt  | tactttttttg | ttgttgacct  | tgctgctcat  | acatagtttc  |

|       |             |             |             |             |             |             |
|-------|-------------|-------------|-------------|-------------|-------------|-------------|
| 6481  | aaaatctata  | ggatctagca  | tcagtggggg  | aaatccacca  | ctacttgtaa  | ctcttgcaat  |
| 6541  | tattttctctt | gcaaaaggga  | aaagaaaagt  | aggtccgcca  | ataaacaaag  | cttgctttac  |
| 6601  | ctcttcctca  | ctcaactctt  | ttaaattttc  | tattgaaaaa  | atgccacaat  | atttcgtctc  |
| 6661  | acaaatgaaa  | gctacacccat | cttttatgcc  | ttcatctttt  | accgttgctt  | tgacttctat  |
| 6721  | atgcaaagta  | atttcatgaa  | aagatttttc  | ttcattcact  | tcttctttgt  | ttttcgctcc  |
| 6781  | ttctaatttt  | gctgaattga  | tattaacccat | tacattaata  | tctgtagctt  | tactagaaga  |
| 6841  | aaggaatggc  | gaattcggat  | tctcaaataga | tagatcttta  | acataattgac | cgtgaattct  |
| 6901  | cattttttgt  | tgtggcattt  | cttacgtctc  | ctttaattaa  | gttgagatat  | ttaatacttt  |
| 6961  | cttatataat  | atattcattt  | acaaacgaat  | agcaaacctg  | attataagtt  | gatatgaaaa  |
| 7021  | acataattttc | attaataaatt | aataatgttc  | ggatacttta  | tatgccaagg  | agttgagtta  |
| 7081  | ctatgataga  | gcttgtaata  | tatgctttat  | tagcggcggt  | catcttttca  | cgtttgtata  |
| 7141  | attcttttagg | aaggtcagcc  | aacctcaacc  | taaaaaagct  | aactaatgta  | ttggatgtaa  |
| 7201  | gccgaagtag  | agaagatgta  | gtagaaaaca  | ttgaggggta  | cattgatagc  | aatgatgaaa  |
| 7261  | attcaataaaa | atttacttat  | aaacaaatat  | taaaaaaaaa  | caaagatttt  | tctatttccc  |
| 7321  | actttataga  | aggttcaagc  | atagcttttg  | aattaataat  | aaaatgtttc  | aatcaaggaa  |
| 7381  | atttgtctca  | gttaaaacca  | cttctcgata  | aagacttata  | tgataatttt  | gcagagaaga  |
| 7441  | ttaaaccatcg | taaagaggtg  | cacgagtcta  | taattgtttc  | tattgtttca  | caaaagattt  |
| 7501  | tagaaataaaa | gctagtataaa | aacgcagtg   | ttattgcagt  | atatttcctt  | tcagagcaaa  |
| 7561  | ttaacttcgt  | taagaataat  | aaaggggata  | tcatatcagg  | tagtacatcc  | accattaata  |
| 7621  | aagttgagga  | tgtatggcaa  | ttcaaaaaaa  | atgttaattc  | atcagaccca  | agctgggtgc  |
| 7681  | ttgtttctat  | tcactataaaa | aagacaagta  | acgataagac  | aaatgacaag  | taagatgagt  |
| 7741  | tttttttgaa  | atggaaagca  | agctacgcga  | aatagtactt  | gacactgaaa  | cgacaggtct  |
| 7801  | tgacactgaa  | tctggtcac   | gaattattga  | aataggggtg  | gtggaattaa  | ttaaccgcat  |
| 7861  | tccaacagggt | aaagtattcc  | atcgggtacct | taaccagaa   | agagatatat  | cttatcactc  |
| 7921  | gtttaagatt  | cacgggtatta | gtgaagaatt  | tttagaagat  | aaaccattat  | tttcaaagt   |
| 7981  | tgacttgaa   | tttcttgact  | ttatatctaa  | tgatattttg  | gtaattcaca  | acgctgaatt  |
| 8041  | cgatgttaag  | ttccttaaca  | tgagactaag  | caagctgaat  | gctgggttaa  | tttctcaga   |
| 8101  | tagagtgcta  | gatacattac  | ctcttgcgag  | gaaaaaattc  | gcaggatcac  | ctgcttcttt  |
| 8161  | gaatgcatta  | tgtaagcggt  | ttgatataat  | gctagagaat  | agagaattgc  | acggagcact  |
| 8221  | agttgatgct  | caattgcttg  | caaagggtata | tggtgaactt  | acaggagggt  | tacaaacctt  |
| 8281  | tctgtttgat  | aatcaatgca  | atcaggacag  | taactctaca  | ttcgttcagc  | ataaagtgcg  |
| 8341  | taatctaact  | cccagagaac  | attcaccaaa  | tagtgaagaa  | attgatgaac  | ataagaaact  |
| 8401  | gttagacaaa  | attaacaata  | cacttttgaa  | taaatatatt  | gaatagggtca | actaataaag  |
| 8461  | atacaatttta | attttactga  | gagcacccta  | atggtaagggt | ttataagatt  | gttatctaata |
| 8521  | gtgctagcag  | cattagcagt  | tgttttttta  | ggttattggt  | atttcactaa  | aaaaggcata  |
| 8581  | tttgccccag  | cagcgattca  | caacgcagaa  | gttaagatag  | gcggagattt  | ttctttaatt  |
| 8641  | aatcaggacg  | gacagatcct  | gcgcagtagt  | gatttttaaag | ataaatacat  | gatgattttc  |
| 8701  | tttgggtttt  | cctcatgcaa  | aagaatttgc  | cctatgaacc  | ttgggataat  | ttcagaaaca  |
| 8761  | cttgcaagggt | tagatgagaa  | aactaacaac  | aagctacaaa  | cattttttat  | cacagttgat  |
| 8821  | cctgagcgcg  | atagcacgga  | aagacttaaa  | gaatttcagc  | agcaatttga  | ccacagaata  |
| 8881  | caaagtgttaa | ctggtgaaag  | agaaaaata   | gacgaagtaa  | ttgcaaagta  | taaagtatat  |
| 8941  | gctagcaaag  | ttggtggaga  | agaagaaatc  | aaccattctt  | caataatgta  | ccttattggc  |
| 9001  | cctggaggaa  | aatatgttac  | acactttgca  | gctgatttaa  | attcagacga  | aagtcaatct  |
| 9061  | gataagattt  | tggtcgagat  | cagaaaatac  | gtaaaactgaa | ttatagattt  | ttctgttaat  |
| 9121  | tagtcgaaca  | cgcaactgca  | tgagcgttat  | aatttaaatct | ctatcgggaa  | gacacattgg  |
| 9181  | aatgacacta  | tttgctgttt  | tcaaaaaata  | acattcgtaa  | aattgtgctt  | ttaatatggg  |
| 9241  | ttatcagttt  | aaaaatgttg  | ctaatacagca | tatatgaatg  | taatattaat  | taacattcat  |
| 9301  | aatgaagca   | ataccatgga  | aatagttat   | aatgccgatg  | caataaaaaat | cttaaggggt  |
| 9361  | cttgatgctg  | taaggaaacg  | tccagggtatg | tacattgggtg | acactgacga  | tggtatctggc |
| 9421  | ttgcatcaca  | tggtatatga  | ggttggtgac  | aacgcaatag  | atgaatcttt  | agctggatat  |
| 9481  | tgtgataaaa  | ttgaagttag  | cataaataaa  | gatggttcag  | tatcagtaac  | cgacaatggt  |
| 9541  | cgtggcattc  | caactgacat  | tcataagaa   | gaaggaatat  | cagcagcaga  | ggtaataatg  |
| 9601  | actcaactcc  | atgctgggtg  | taaatttgac  | agtaataacct | ataaagtttc  | tgggggatta  |
| 9661  | catgggtgtt  | gaatctcagt  | tgtgaatgca  | ttatcaagct  | ggttggaatt  | aactatttgg  |
| 9721  | cgcaataaga  | aagaacactt  | tatgcgtttt  | gaagatgggtg | agtctattga  | acctttaaag  |
| 9781  | gtagtcaacg  | aaaatacaaa  | caaaagagga  | actaaagtca  | cgttcatgcc  | atcaacagag  |
| 9841  | acttttaaatg | gcattaattt  | cagttactca  | acgcttgaaa  | gtcgtataag  | agaattagca  |
| 9901  | tttttaaat   | caaatatcga  | cattacttta  | cgtgatctgc  | gcaatgaacc  | atatacagaa  |
| 9961  | tctcattttca | atcagagcaa  | tcaatctaaa  | gacaattttg  | gtacagcaaa  | ttttgtgcag  |
| 10021 | tatttagata  | agaataagac  | acatgtaact  | aaaattgccca | gtatgaaagg  | agatgcagac  |

```

10081 gatcttggca tcagcttggga aatatcgatg gaatggaatg attcctacta tgagaatatg
10141 ttgtgtttca ctaataatat acggcaacga gatggtggta cgcatttggc aggatttaga
10201 tctgcactaa ctagatgtat caatacctat gcaactaatg aaggggtttt aaagaaagca
10261 aaagtaaatt taactggaga ggacgttaga gaaggtttta cttgtgtttt atctcttaag
10321 atgcctgatc ctaagttttc ttcacaaaca aaagataaac tagttagttc tgaagcacgt
10381 gcagttgtag aaagtatatg ttctgataaa ttgagcacia tccttgaaac tgatcccaaa
10441 ttggcagcaa gcatagtaga aagagcaatc aggtcagcaa aaggaagaga agctgcaaga
10501 aaagcgcgcg agctagttaa aagcaaaaac aatattgata ttgcaactct gccaggaaag
10561 cttgctgatt gtcaggaaaa agctcctgag ttatcggaat tatttatagt agagggtaat
10621 tcagcaggtg gtactgcaaa gcaggggctg aatcgtaaaa cacaagcagt gcttgcctta
10681 agaggaaaaa ttctaaacgt agaacgtgta agtttagatc gtattttttc atctgcagaa
10741 ataggctctt taatcactgc aattgggtgct ggaataggga gtgaacactt cgatattgaa
10801 aaagctagat atcataaaat tatcatcatg acagatgcag atgttgatgg ttcacatata
10861 agaactttga ttctaacttt ctttttttaga catatgcgtg aagttattga aaaagggtac
10921 ttatacatag cacagccacc cctctataaa gttacaaaga atgccaaaga cacttatatt
10981 aaagatgacg aaacttttga agagtatata ataaactcag cagttaaaag attaactacta
11041 agtggtagac ctacagaatt taacgacttg cgccttattt tgaataaatg cgtagcattt
11101 tctaataatta gcaaaaatta tgatagagaa ataccacaaa atctcctaga gtcattgcta
11161 attttaagca aaaagaatgc tctatcatcg gctgatgaga tattaaagta tttaaaatta
11221 atgtacagcg aatacacttg ggaagtagaa ataaaagatg aagaaaaaga aattcacatc
11281 tctaaattgt ttcaaggatt ggcagacaaa tatatatatt cacttagtat gcttgaaggc
11341 aaagatatgc aaagcatatt aagtttgctt gatggtataa gtaatttatt taatggtgat
11401 tcatttttta agtcacaaga aactgaaata agaatacact ctccaagtac gcttgcaaaa
11461 ataataatgg actatggtaa aaagggttta actctgcaga gatttaaagg tcttggtgaa
11521 atgaatgctg atcagctatg ggatactacg ttaaatcctg aggctagaac tttactgaag
11581 gttgaaataa aagattgtga agaagctgat tccatatatt caatacta atgggtgatata
11641 gttgaaccac gccgtgattt tattaatagc aatgcactca acgtgcatga tgttgatatt
11701 tgaactttta gcaaaatgta cgaacgttac gggtttaagc aaagactgtg tcattcaagt
11761 agctgacact ggttccttta taacggtgtc attccagtgc ttgacactgg aatccagggt
11821 gtcacaagc aaactagcat agaaagtggg tacaacgttt tcgatgagat tgcagaaagg
11881 ctggattcca gtgtcaagca ctggaatgaa agcagtccta cgtcatgccg cgattcattc
11941 gcggtatctc tagatcccgc taacaagcag cgggatgacg gttgtcaggg tgtctccac
12001 taccttctcc tgtcatccca gtgcctccct cccctgtcat ccaagtagct tgacacttgt
12061 atctttatga tgtgaggcat tagagctaaa atacctcaca gggagggtga agctgatgag
12121 acgctaatac cattaaggcc gaatcccaga ttttgcttcc ctcccataga gttatagctc
12181 ttctcataat aatccaaata aggttaagaat ggatttatgg tagaggggtt tgtatgccag
12241 cagcgtatag ttacgactta aggaaaaaag caatggaagc attggatgaa ggagaaagta
12301 gagcaactgt tgccaagaga tttaaaattg gaaaaacgac tttatatgag tggcagaaaa
12361 ggcgtgagga aacgggagat tttcagtcaa aaaagcctgg aagcgtagca taaaattacc
12421 gactggaatg tcttcaccga atttgcaaaa aaccatggtg gcaagactca gtcagagatg
12481 gccaaactct ggagtcgaca aatgattcac cgcgcaacta aaaatattgg atttacaaga
12541 aaaaaagacc tacggatata aagaaagaaa tgaagaaaag cgagctcaat ttgcaagggt
12601 tatagagaca aaacatcgtg ataactttgt atatattgac cttaccaga aaaagtggag
12661 aga

```

//

```

LOCUS      JAQZAU010000121          24412 bp    dna        linear    ENV 17-MAR-2023
DEFINITION MAG: Wolbachia pipientis isolate wEsol contig_57100, whole genome
            shotgun sequence.
ACCESSION  JAQZAU010000121  JAQZAU010000000
VERSION    JAQZAU010000121.1
DBLINK     BioProject: PRJNA929258
            BioSample: SAMN33142973
KEYWORDS   WGS; ENV; Metagenome Assembled Genome; MAG.
SOURCE     Wolbachia pipientis (insect metagenome)
ORGANISM   Wolbachia pipientis
            Bacteria; Pseudomonadota; Alphaproteobacteria; Rickettsiales;
            Anaplasmataceae; Wolbachieae; Wolbachia.
REFERENCE  1 (bases 1 to 24412)
AUTHORS    Fiutek,N., Couger,B.M., Roy,S., de la Torre,J.R. and Connor,E.F.
TITLE      Genomic assessment of the contribution of the Wolbachia

```

endosymbiont of *Eurosta solidaginis* to gall-induction

JOURNAL International Journal Molecular Sciences

REFERENCE 2 (bases 1 to 24412)

AUTHORS Fiutek,N., Couger,B.M., Roy,S., de la Torre,J.R. and Connor,E.F.

TITLE Direct Submission

JOURNAL Submitted (10-FEB-2023) Biology, San Francisco State University, 1600 Holloway Ave, San Francisco, CA 94132, USA

COMMENT ##Genome-Assembly-Data-START##

Assembly Date :: JUN-2019

Assembly Method :: FLYE v. 06-2019

Genome Representation :: Full

Expected Final Version :: Yes

Genome Coverage :: 100.0x

Sequencing Technology :: Illumina HiSeq; PacBio Sequel

##Genome-Assembly-Data-END##

FEATURES

Location/Qualifiers

source 1..24412

/organism="Wolbachia pipientis"

/mol\_type="genomic DNA"

/submitter\_seqid="contig\_57100"

/isolate="wEsol"

/isolation\_source="galls on Solidago altissima"

/host="Eurosta solidaginis MN-2018-EFC"

/db\_xref="taxon:955"

/environmental\_sample

/country="USA: Cowling Arboretum, Carleton College, Northfield, MN"

/lat\_lon="44.48 N 93.13 W"

/altitude="280 m"

/collection\_date="2018-11"

/metagenome\_source="insect metagenome"

/note="metagenomic"

gene complement(25..366)

/locus\_tag="wEsol\_01412"

CDS complement(25..366)

/locus\_tag="wEsol\_01412"

/codon\_start=1

/transl\_table=11

/fullproduct="qcoverage 100 , hcoverage 100 , similarity 100 , identity 100 , evalue 1.53e-79 , alnlength 113 , Bacteria , Proteobacteria , AAS13810.1 transposase, IS5 family, OrfB [Wolbachia endosymbiont of Drosophila melanogaster]"

/cog="COG3293 COG3293 124 Transposase and inactivated derivatives"

/pfam="DDE\_Tnp\_1\_2 DDE\_Tnp\_1"

/product="transposase, IS5 family, OrfB"

/translation="MRTKYTKVKKMWADMGYQGRNLKNHIKEEYDIDIEIVKRPPCRF WVHKDTPPELLPTREQGFKVQPRRWVVERTFAWVNRNRRLSKEYDLLTTSTENFIYLA MSRVMLKREYA"

/besthit="qcoverage 100 , hcoverage 100 , similarity 100 , identity 100 , evalue 1.53e-79 , alnlength 113 , Bacteria , Proteobacteria , AAS13810.1 transposase, IS5 family, OrfB [Wolbachia endosymbiont of Drosophila melanogaster]"

gene complement(477..857)

/locus\_tag="wEsol\_01413"

CDS complement(477..857)

/locus\_tag="wEsol\_01413"

/codon\_start=1

```

/transl_table=11
/fullproduct="qcoverage 100 , hcoverage 100 , similarity
100 , identity 100 , evalue 1.16e-87 , alnlength 126 ,
Bacteria , Proteobacteria , AOV87106.1 transposase
[Wolbachia endosymbiont of Drosophila incompta]"
/cog="COG3293 COG3293 124 Transposase and inactivated
derivatives"
/pfam="DUF4096"
/product="transposase"
/translation="MRKKYPTDLSEREWARIEKHFRVSYKKGGRRPPKYSKREILEAIF
YVLRGTGCQWRYLPNDFPLWKTVYEQFRQWKKQGIFEKMNYEITKYSRRKIGRNEQPSA
CIVDSQSVKTTEKGGSKAMMEVKK"
/besthit="qcoverage 100 , hcoverage 100 , similarity 100
, identity 100 , evalue 1.16e-87 , alnlength 126 ,
Bacteria , Proteobacteria , AOV87106.1 transposase
[Wolbachia endosymbiont of Drosophila incompta]"
gene complement(895..1053)
/locus_tag="wEsol_01414"
CDS complement(895..1053)
/locus_tag="wEsol_01414"
/codon_start=1
/transl_table=11
/product="hypothetical protein"
/pfam="Pfam-B_12992 Pfam-B_14565"
/translation="MSINIEVTDNINKVIENVNAERKKVEKAAVRALNKTALWLKTQA
AKRLSGNK"
/besthit="qcoverage 100 , hcoverage 30.0578034682081 ,
similarity 94.2 , identity 92.3 , evalue 8.96e-20 ,
alnlength 52 , Bacteria , Proteobacteria , WP_006280676.1
MULTISPECIES: phage tail protein [Wolbachia]"
gene complement(1055..1360)
/locus_tag="wEsol_01415"
CDS complement(1055..1360)
/locus_tag="wEsol_01415"
/codon_start=1
/transl_table=11
/fullproduct="qcoverage 100 , hcoverage 100 , similarity
100 , identity 100 , evalue 1.45e-67 , alnlength 101 ,
Bacteria;Viruses , Proteobacteria;Uroviricota ,
WP_007550857.1 MULTISPECIES: hypothetical protein
[Wolbachia]"
/translation="MQENIKRLLQDCFAHLGKVALYESKD KSYMVQVLKQQPDKLYEI
GEGQFVGEILLLEVSFVDVLKPMVGDTFSIGSCRYRVHTPPLRDNSGMVWIKI QASGV"
/product="hypothetical protein"
/besthit="qcoverage 100 , hcoverage 100 , similarity 100
, identity 100 , evalue 1.45e-67 , alnlength 101 ,
Bacteria;Viruses , Proteobacteria;Uroviricota ,
WP_007550857.1 MULTISPECIES: hypothetical protein
[Wolbachia]"
gene complement(1458..2462)
/locus_tag="wEsol_01416"
CDS complement(1458..2462)
/locus_tag="wEsol_01416"
/codon_start=1
/transl_table=11
/pfam="Phage_cap_E"
/fullproduct="qcoverage 100 , hcoverage 100 , similarity
100 , identity 100 , evalue 6.04e-245 , alnlength 334 ,
Bacteria , Proteobacteria , WP_006280204.1 MULTISPECIES:
major capsid protein [Wolbachia]"

```

```

/translation="MQNPFTNTAFSMTALTNAINILPINYGRVENLNLFPSRSVFRH
ITIEEQNGVLSLLPTQLPGAPATVGKRGKRKIRFTFTIPHIPHDDVVLPEEVQGIRAFG
SESELKALADVITDHLQLMRNKHAIITLEHLRMGALKGIILDADGSELLNLYNEFEITP
KVVNFALGTATTDVKKRCLEVLRHVEDNLSGEYMTGIHALVSPEFFDALISHSKVKEA
YERWQEGAALRNDMRSGFTFCGITFEEYRGQATDPEGTVRRFIERESGNCFPPLGTAST
FTTYFAPADFNETVNTLGQPLYAKQEPRRFDRGTDLHTQSNSLPMCHRPGLVKVVVT
"
/product="major capsid
protein"
/besthit="qcoverage 100 , hcoverage 100 , similarity 100
, identity 100 , evalue 6.04e-245 , alnlength 334 ,
Bacteria , Proteobacteria , WP_006280204.1 MULTISPECIES:
major capsid protein [Wolbachia]"
gene complement(2500..2871)
/locus_tag="wEsol_01417"
CDS complement(2500..2871)
/locus_tag="wEsol_01417"
/codon_start=1
/transl_table=11
/pfam="HDPD"
/fullproduct="qcoverage 100 , hcoverage 100 , similarity
100 , identity 100 , evalue 5.57e-80 , alnlength 123 ,
Bacteria;Viruses , Proteobacteria;Uroviricota ,
WP_010082142.1 MULTISPECIES: head decoration protein
[Wolbachia]"
/translation="MISITEGNNLGDLLKYEVSNNLYSRDQITVAKGQNLKLGKVVGYD
TKDGFIAKALNPTATDGTQTAIGVIASDVNAKENS KGVIIARGAILADHAVVWPANIIE
EQKTAAIKHLEGRGIIIRKGA"
/product="head decoration
protein"
/besthit="qcoverage 100 , hcoverage 100 , similarity 100
, identity 100 , evalue 5.57e-80 , alnlength 123 ,
Bacteria;Viruses , Proteobacteria;Uroviricota ,
WP_010082142.1 MULTISPECIES: head decoration protein
[Wolbachia]"
gene complement(2946..4007)
/locus_tag="wEsol_01418"
CDS complement(2946..4007)
/locus_tag="wEsol_01418"
/codon_start=1
/transl_table=11
/pfam="CLP_protease Peptidase_S49"
/fullproduct="qcoverage 100 , hcoverage 100 , similarity
100 , identity 100 , evalue 1.16e-238 , alnlength 353 ,
Bacteria , Proteobacteria , WP_155968609.1 S49 family
peptidase [Wolbachia pipientis]"
/translation="MKNQAIWLNRCVMVEPRSFELLSLQTGKQPIFKNIKHAVRNSER
GIPIHGILTKKSEVFDDVFGMTSYEKISEEIEEALIDKEVETIILDIDSPGGEVNGL
FDLSDFIYQARRKKRIVAIANDDAYSAAAYAIASSAEKVLVTRTSGVGSIGVIA SHIDQ
SGFDEKQGIKYTTVFAGSRKNDLNPHEPITSESLESLKSEVNRLYGMLVELIARNRNL
SVEAIKSTEAGLYFGKAVEIGLADGITILSEFKSINKKGDITMNEKTTNDLETDLNLT
KYRTEVLELIRLCNLSRMPEKIGEFIEQSVSVEQAREVLMELLAERTKKTEILSAIPQ
NSGEELMMQVAKSRAQSNI"
/product="S49 family peptidase"
/besthit="qcoverage 100 , hcoverage 100 , similarity 100
, identity 100 , evalue 1.16e-238 , alnlength 353 ,
Bacteria , Proteobacteria , WP_155968609.1 S49 family
peptidase [Wolbachia pipientis]"
gene complement(4004..5422)
/locus_tag="wEsol_01419"

```

CDS complement(4004..5422)  
 /locus\_tag="wEsol\_01419"  
 /codon\_start=1  
 /transl\_table=11  
 /fullproduct="qcoverage 100 , hcoverage 100 , similarity 100 , identity 100 , evalue 0.0 , alnlength 472 , Bacteria , Proteobacteria , WP\_012673196.1 MULTISPECIES: phage portal protein [Wolbachia]"  
 /cog="COG5511 COG5511 492 Bacteriophage capsid protein"  
 /pfam="Phage\_portal\_2"  
 /tigr="TIGR01539 portal\_lambda 457 phage portal protein, lambda family"  
 /product="phage portal protein"  
 /translation="MLLKSFQQLFNKPKIKSSAWDAAGSGRRFFHFQPELGSINLLS QNLETLSRSRDMVRKNPYAANIIDTIVSNSIGTGIKPQSKARDGEFRKRVQELWLRW TDEADSNVSDFYGLQALVCRSMIEGGEFCVRLRTRKLED RFSVPLQLQVLESEHLDN KTNQTLGNGNVIRNGIEFNKLQGREAYYLFKEHPGEGSFGESVRVPANDVLHIYRPLR PGQIRGEPWLSSILLKLYELDQYDDAELVRKKTAAAMFAGFITRLDPEANILGEGESNE QGVALSGLEPGTMQLLDPGEDIKFSEPSDVGGSYEAFMRQQLRAIAIGTGITYEQLTG DLTGVNYSSIRAGLIEFRRCAMLQHNIMVFQFCRPVWSRWLELAVLCGELSIDKKVA KAAKEEVKWIPQGFWDVPLKDQQAQQMAVRNGFKSRSEVVSELGYDVEEIDQEIAED QRRASSLGLSFDSDVTTNQEII"  
 /besthit="qcoverage 100 , hcoverage 100 , similarity 100 , identity 100 , evalue 0.0 , alnlength 472 , Bacteria , Proteobacteria , WP\_012673196.1 MULTISPECIES: phage portal protein [Wolbachia]"

gene complement(5525..5806)  
 /locus\_tag="wEsol\_01420"

CDS complement(5525..5806)  
 /locus\_tag="wEsol\_01420"  
 /codon\_start=1  
 /transl\_table=11  
 /fullproduct="qcoverage 100 , hcoverage 100 , similarity 100 , identity 100 , evalue 1.20e-60 , alnlength 93 , Bacteria;Viruses , Proteobacteria;Uroviricota , WP\_010962706.1 MULTISPECIES: type II toxin-antitoxin system RelE/ParE family toxin [Wolbachia]"  
 /cog="RelE COG2026 90 Cytotoxic translational repressor of toxin-antitoxin stability system"  
 /pfam="Plasmid\_stabil"  
 /tigr="TIGR02385 RelE\_StbE 88 addiction module toxin, RelE/StbE family"  
 /product="type II toxin-antitoxin system RelE/ParE family toxin"  
 /translation="MGIIYQIGYLEGVDTE DLPSLPKTIRLRVQKAIEKRLTIIPDKV GEALSHKWVG YFRLRVGDYRVIY LIDNSEHMKIAAIGHRKEIYKRSPE"  
 /besthit="qcoverage 100 , hcoverage 100 , similarity 100 , identity 100 , evalue 1.20e-60 , alnlength 93 , Bacteria;Viruses , Proteobacteria;Uroviricota , WP\_010962706.1 MULTISPECIES: type II toxin-antitoxin system RelE/ParE family toxin [Wolbachia]"

gene complement(5797..6057)  
 /locus\_tag="wEsol\_01421"

CDS complement(5797..6057)  
 /locus\_tag="wEsol\_01421"  
 /codon\_start=1  
 /transl\_table=11  
 /pfam="RHH\_4 Pfam-B\_9743"  
 /fullproduct="qcoverage 100 , hcoverage 100 , similarity

```

100 , identity 100 , evalue 2.45e-50 , alnlength 86 ,
Bacteria;Viruses , Proteobacteria;Uroviricota ,
WP_012673197.1 MULTISPECIES: hypothetical protein
[Wolbachia]"
/translation="MDQSQGRNLNVNVEFEQFAQYLTEMAKVQNRTIEEIVKDLVEEE
LEVSKLSEGDDEGEIALLLEAAKRNVPGAKIIRHEDIKWE"
/product="hypothetical protein"
/besthit="qcoverage 100 , hcoverage 100 , similarity 100
, identity 100 , evalue 2.45e-50 , alnlength 86 ,
Bacteria;Viruses , Proteobacteria;Uroviricota ,
WP_012673197.1 MULTISPECIES: hypothetical protein
[Wolbachia]"
gene complement(6098..6331)
/locus_tag="wEsol_01422"
CDS complement(6098..6331)
/locus_tag="wEsol_01422"
/codon_start=1
/transl_table=11
/pfam="gpW"
/fullproduct="qcoverage 100 , hcoverage 100 , similarity
100 , identity 100 , evalue 1.15e-44 , alnlength 77 ,
Bacteria;Viruses , Proteobacteria;Uroviricota ,
WP_010962704.1 MULTISPECIES: hypothetical protein
[Wolbachia]"
/translation="MYNEDYLIQVEEAIKKLQNGERVVSIAYGDHVVRVYAEVDINDLL
SLRQRIKAELKIAGMKPKRKIVFSTNKGVDKIM"
/product="hypothetical protein"
/besthit="qcoverage 100 , hcoverage 100 , similarity 100
, identity 100 , evalue 1.15e-44 , alnlength 77 ,
Bacteria;Viruses , Proteobacteria;Uroviricota ,
WP_010962704.1 MULTISPECIES: hypothetical protein
[Wolbachia]"
gene complement(6335..8158)
/locus_tag="wEsol_01423"
CDS complement(6335..8158)
/locus_tag="wEsol_01423"
/codon_start=1
/transl_table=11
/fullproduct="qcoverage 100 , hcoverage 100 , similarity
99.3 , identity 99.3 , evalue 0.0 , alnlength 607 ,
Bacteria , Proteobacteria , WP_012673198.1 MULTISPECIES:
phage terminase large subunit family protein [Wolbachia]"
/cog="COG5525 COG5525 611 Phage terminase, large subunit
GpA"
/pfam="Terminase_GpA DUF3268"
/product="phage terminase
large subunit family protein"
/translation="MIYATSFSEGLKPDPELVSEWANEYRVLAAPTAASEPGKWRTER
TPYLKEIMDSLSPSSPAEKVVFMKGAQIGGTEAGNNWIGYIIYQTPGPMLVVQPTVEM
GKRWSKGRFAPLIESTPCLKSKVKDPRSRDSGNTVQSKEFFGGIVVITGANSSVGLRS
MPVKYFLFLDEIDAYPGDSGGEGDPVLLSIARTNTSARRKIFLVSTPTIHGISRIEKEF
EATDKQYFFVPCPYCNYYQVLKWSQIKWENNDSTRAHYVCTECSGKIENHQKTEMLER
GEWRPTNRVKGEKKGFHLSSLYSPVGWYSWTQAVEDFLHAKESEQLLKVWINTTLGET
WVDKGEVDPDWKQLFNRREFFPVGTVPREVVLTAGVDVQKDRLEVEVVAWGKSRESWS
IEYRVFEGDTGRGEVWGKLSSELLNHHFIGENGLEYMISMMAVDAGYATQEVYNWVRGH
QGSGRVMVKGVNKALVPLSSPSRVDITVGGQKLKRGIKLWPGVVSILKSELFQLLN
LKDGEEAPAGYCHFPEYAPEYFKQLTAEQLVSKVVKGYTKQEWQKVRERNEVLDCRIY
ARAASIALGIDRWPEKWSNLSEKPESKSKKIVKSKWISE"
/besthit="qcoverage 100 , hcoverage 100 , similarity 99.3
, identity 99.3 , evalue 0.0 , alnlength 607 , Bacteria ,

```

gene Proteobacteria , WP\_012673198.1 MULTISPECIES: phage terminase large subunit family protein [Wolbachia]  
complement(8155..9066)  
/locus\_tag="wEsol\_01424"

CDS complement(8155..9066)  
/locus\_tag="wEsol\_01424"  
/codon\_start=1  
/transl\_table=11  
/pfam="Ank\_2 Ank\_4 Ank\_5 Ank Ank Ank\_2 Ank\_4 Ank\_5 Ank Ank\_3"  
/fullproduct="qcoverage 97.3597359735974 , hcoverage 88.3233532934132 , similarity 100 , identity 99.0 , evaluate 6.16e-198 , alnlength 295 , Bacteria , Proteobacteria , WP\_070356857.1 ankyrin repeat domain-containing protein, partial [Wolbachia endosymbiont of Drosophila incompta]"  
/translation="MLEFTSFRTTSNYDERDLCLDIVRCLINVPNAGVNLQDYENKTP LHYAERLKTIEVLLTREDIDPLIKDDNGKTPFCYAKEANRLDIVKILASNRYGADKNS LLHLAARKGYEDLIDGILGEGVEIDAVDESGKTGIYVAVKHGHFNVVKLLLKRGAAT DVFQYAIITNNAKLIKLLSKEKEIVLFGRQKNFPTFHLLSNKYFEERKIADKKIKKYI NIVCVSITVCAIVIVGIYPNIIAAVMVGIVALIAAIAAMSNTQKYIEEAEKKMFIEL ESEKTSECSSILSDVEVSSNDGEELAI"  
/product="ankyrin repeat domain-containing protein, partial"  
/besthit="qcoverage 97.3597359735974 , hcoverage 88.3233532934132 , similarity 100 , identity 99.0 , evaluate 6.16e-198 , alnlength 295 , Bacteria , Proteobacteria , WP\_070356857.1 ankyrin repeat domain-containing protein, partial [Wolbachia endosymbiont of Drosophila incompta]"

gene complement(9059..9400)  
/locus\_tag="wEsol\_01425"

CDS complement(9059..9400)  
/locus\_tag="wEsol\_01425"  
/codon\_start=1  
/transl\_table=11  
/fullproduct="qcoverage 100 , hcoverage 100 , similarity 100 , identity 100 , evaluate 1.53e-79 , alnlength 113 , Bacteria , Proteobacteria , AAS13810.1 transposase, IS5 family, OrfB [Wolbachia endosymbiont of Drosophila melanogaster]"  
/cog="COG3293 COG3293 124 Transposase and inactivated derivatives"  
/pfam="DDE\_Tnp\_1\_2 DDE\_Tnp\_1"  
/product="transposase, IS5 family, OrfB"  
/translation="MRTKYTKVKKMWADMGYQGRNLKNHIKEEYDIDIEIVKRPPCRF WVHKDTPPELLPTREQGFKVQPRRWVVERTFAWVNRRRLSKEYDLLTTSTENFIYLA MSRVMLKREYA"  
/besthit="qcoverage 100 , hcoverage 100 , similarity 100 , identity 100 , evaluate 1.53e-79 , alnlength 113 , Bacteria , Proteobacteria , AAS13810.1 transposase, IS5 family, OrfB [Wolbachia endosymbiont of Drosophila melanogaster]"

gene complement(9511..9891)  
/locus\_tag="wEsol\_01426"

CDS complement(9511..9891)  
/locus\_tag="wEsol\_01426"  
/codon\_start=1  
/transl\_table=11  
/fullproduct="qcoverage 100 , hcoverage 100 , similarity

100 , identity 100 , evalue 1.16e-87 , alnlength 126 ,  
Bacteria , Proteobacteria , AOV87106.1 transposase  
[Wolbachia endosymbiont of Drosophila incompta]"  
/cog="COG3293 COG3293 124 Transposase and inactivated  
derivatives"  
/pfam="DUF4096"  
/product="transposase"  
/translation="MRKKYPTDLSEREWARIEKHFRVSYKKGGRPPKYSKREILEAIF  
YVLRTGCQWRYLPNDFPLWKTVYEQFRQWKKQGIFEKMNYEITKYSRRKIGRNEQPSA  
CIVDSQSVKTTEKGGSKAMMEVKK"  
/besthit="qcoverage 100 , hcoverage 100 , similarity 100  
, identity 100 , evalue 1.16e-87 , alnlength 126 ,  
Bacteria , Proteobacteria , AOV87106.1 transposase  
[Wolbachia endosymbiont of Drosophila incompta]"  
gene complement(9919..10353)  
/locus\_tag="wEsol\_01427"  
CDS complement(9919..10353)  
/locus\_tag="wEsol\_01427"  
/codon\_start=1  
/transl\_table=11  
/product="hypothetical protein"  
/translation="MGSTIVPENSFYKSVRYVDNVLGPVKDVICGVESKDNYNKYYQD  
NDKCEYVGHRAEGVYSLCTLGAVLAANIILQPLFLIVACLSYFPVKLLSKITGDYCFK  
TDTKS FVNYSNIFLEMGQDCANAVARVFNKIVRGCPEISKRL"  
/besthit="qcoverage 91.6666666666667 , hcoverage  
61.6822429906542 , similarity 100 , identity 98.5 ,  
evalue 8.61e-89 , alnlength 132 , Bacteria ,  
Proteobacteria , WP\_174515954.1 hypothetical protein  
[Wolbachia endosymbiont of Cardiocondyla obscurior]"  
gene 10392..10739  
/locus\_tag="wEsol\_01428"  
CDS 10392..10739  
/locus\_tag="wEsol\_01428"  
/codon\_start=1  
/transl\_table=11  
/fullproduct="qcoverage 100 , hcoverage 100 , similarity  
100 , identity 100 , evalue 2.74e-74 , alnlength 115 ,  
Bacteria;Eukaryota , Proteobacteria;Arthropoda ,  
WP\_155968342.1 MULTISPECIES: IS630 transposase-related  
protein [Wolbachia]"  
/cog="COG3415 COG3415 138 Transposase and inactivated  
derivatives"  
/pfam="HTH\_Tnp\_IS630 HTH\_Tnp\_1 HTH\_23 HTH\_28 HTH\_29 HTH\_7  
CENP-B\_N Pfam-B\_14738 HTH\_8 HTH\_17 HTH\_24 Pfam-B\_2106"  
/product="IS630  
transposase-related protein"  
/translation="MAYSVDLRERAVSMIEKGKSKVEVAELLEIGIATLYRWLRKKAA  
GESLRPSKNGSFIRKIDPKILEEYVKKNPDHTLAEMQN LGFGINSIWYRLKQLRITL  
KKS YTISRAQSRR"  
/besthit="qcoverage 100 , hcoverage 100 , similarity 100  
, identity 100 , evalue 2.74e-74 , alnlength 115 ,  
Bacteria;Eukaryota , Proteobacteria;Arthropoda ,  
WP\_155968342.1 MULTISPECIES: IS630 transposase-related  
protein [Wolbachia]"  
gene 10939..11250  
/locus\_tag="wEsol\_01429"  
CDS 10939..11250  
/locus\_tag="wEsol\_01429"  
/codon\_start=1  
/transl\_table=11

```

/fullproduct="qcoverage 100 , hcoverage 100 , similarity
100 , identity 100 , evalue 1.60e-74 , alnlength 103 ,
Bacteria , Proteobacteria , WP_155968470.1 transposase
[Wolbachia pipientis]"
/cog="COG3335 COG3335 132 Transposase and inactivated
derivatives"
/pfam="DDE_3 DDE_1"
/product="transposase"
/translation="MTFKGGCDKEVFNTWLEKMLLPKLPHGTTIVMDNATFHKTPKTK
ELIDNARCRLLYLPTYSPDLNPIEHCWNTIKSRLRPLMHKYTDLQLLVGNTIMEIYHS
F"
/besthit="qcoverage 100 , hcoverage 100 , similarity 100
, identity 100 , evalue 1.60e-74 , alnlength 103 ,
Bacteria , Proteobacteria , WP_155968470.1 transposase
[Wolbachia pipientis]"
gene complement(11257..11367)
/locus_tag="wEsol_01430"
CDS complement(11257..11367)
/locus_tag="wEsol_01430"
/codon_start=1
/transl_table=11
/product="hypothetical protein"
/translation="MLHIYDLERVMSVYRYFKRYVEYGVVPAKKAEDNTL"
/besthit="qcoverage 97.2222222222222 , hcoverage
47.945205479452 , similarity 94.3 , identity 88.6 ,
evalue 2.79e-13 , alnlength 35 , Bacteria ,
Proteobacteria , EAL57947.1 conserved hypothetical
protein, partial [Wolbachia endosymbiont of Drosophila
ananassae]"
gene complement(11392..14187)
/locus_tag="wEsol_01431"
CDS complement(11392..14187)
/locus_tag="wEsol_01431"
/codon_start=1
/transl_table=11
/fullproduct="qcoverage 100 , hcoverage 100 , similarity
100 , identity 100 , evalue 0.0 , alnlength 931 ,
Bacteria , Proteobacteria , WP_141457255.1 excinuclease
ABC subunit UvrA [Wolbachia endosymbiont of Carposina
sasakii]"
/cog="UvrA COG0178 935 Excinuclease ATPase subunit"
/pfam="Pfam-B_13343 AAA_29 AAA_25 AAA_16 Pfam-B_13343
Pfam-B_13343 ABC_tran Pfam-B_3856 Pfam-B_15070
BCA_ABC_TP_C Pfam-B_13343 ABC_tran DnaJ_CXXCXGXXG
Pfam-B_13343 SMC_N AAA_21 Pfam-B_3856 BCA_ABC_TP_C"
/tigr="TIGR00630 uvra_924 excinuclease ABC subunit A"
/product="excinuclease ABC subunit UvrA"
/translation="MDDFIRVKGAREHNLQGVDVNIPKNKLVVITGLSGSGKSSLAFD
TIYAEGQRRYVESLSAYARQFLNIQDKPDVESITGLSPAISINQKSISKNPSTVGTV
TEIYDYLRLLVYARIGVPYSPATGLPITKQTVSQIVDTIIALPLETKIYILAPVVRGRK
GEHLKEILEIKRQGYVRFKIDGEVYNVDDLPKLDKNKKHDFVAVDRISILGDIGNRL
PSSIESALKLGNGLMYVEIVNLPDNNHSEYKNGQILTFSENFACPESGFTLEEIEPRL
FSFNSPYGACGSCNGLGKKLAIDVKLIVPDETLSISEGALKPVGSMFRQVHTGYGFLK
SAILSLAENCKFSLDVPWKNIDQEVKDMILFGFGKFQGLVSILENQMDYDETLVERYC
SVTHCRECTGYRLRKEALTVKIDSKHIGEISGLSIDESLKWFFENLPDKLTEQQKQISN
KILSEIIKRLTFLKNVGLNYLTLDRESSTLSGGESQRIRLASQIGSGLTGVLVLDPEP
SIGLHQCDNDRLIATLKNLRDMGNTVIVVEHDEDTIMAADYAIDIGPGAGVNGGKVVA
EGTPDQVQRNSGSITQYLSGEKKILIPRRRKQATQFIKVINACENNLKNVNVKFPPIG
NLICVTGISGGGKSSLVIETLYKYSAHKIHHSSARYGQCDRIEGLEYIDKVIEVDQSP
IGRTPASNPATYVGMFTHIRNWFAGLSESKARGYNIGRFSFNTRGGRCEACKGDGHLK

```

```

IEMHFLPDVYVKCEQCKGRRYNRETLEVITYKEKSISDVLDMTIDQACVFFENLPMVKE
KLVSLQEVGLGYIKLGQSSTTLSGGEAQRIKLSKELSKRFTGRTLYILDEPTTGLHFE
DINNLLKILHRLVDLGN TVIVIEHNLHVIKTADYIIDIGPEGGIKGGEVIATGTPEEV
VKIPESVTGRYLKTYLL"
/blasthit="qcoverage 100 , hcoverage 100 , similarity 100
, identity 100 , evalue 0.0 , alnlength 931 , Bacteria ,
Proteobacteria , WP_141457255.1 excinuclease ABC subunit
UvrA [Wolbachia endosymbiont of Carposina sasakii]"
gene complement(14811..15323)
/locus_tag="wEsol_01432"
CDS complement(14811..15323)
/locus_tag="wEsol_01432"
/codon_start=1
/transl_table=11
/pfam="DUF165"
/fullproduct="qcoverage 100 , hcoverage 100 , similarity
100 , identity 100 , evalue 3.86e-105 , alnlength 170 ,
Bacteria , Proteobacteria , WP_015589273.1 MULTISPECIES:
hypothetical protein [unclassified Wolbachia]"
/translation="MSILSILLFISLSLLNTSNKLMICAALFVGAALVVNSMVEFYGR
SKATYNLIVCIA LCCVFKWQSFNLMILISYTAILVSLSSIIIFEKLSKLNLFHMANF
ITLIIASVVD SAVVCVGLLYKFSAGKCLSIYIRDLIFKFSYVSVLSICLFVGM YLFCL
ANKKYFKIST"
/product="hypothetical protein"
/blasthit="qcoverage 100 , hcoverage 100 , similarity 100
, identity 100 , evalue 3.86e-105 , alnlength 170 ,
Bacteria , Proteobacteria , WP_015589273.1 MULTISPECIES:
hypothetical protein [unclassified Wolbachia]"
gene complement(15419..18433)
/locus_tag="wEsol_01433"
CDS complement(15419..18433)
/locus_tag="wEsol_01433"
/codon_start=1
/transl_table=11
/fullproduct="qcoverage 100 , hcoverage 100 , similarity
99.9 , identity 99.9 , evalue 0.0 , alnlength 1004 ,
Bacteria , Proteobacteria , WP_141457253.1
phosphoribosylformylglycinamide synthase [Wolbachia
endosymbiont of Carposina sasakii]"
/pfam="AIRS AIRS_C AIRS AIRS_C"
/tigr="TIGR01736 FGAM_synth_II 718
phosphoribosylformylglycinamide synthase II"
/product="WP_141457253.1
phosphoribosylformylglycinamide synthase"
/translation="MANIRIEVLNKCEQIGCRWLVNVYSIYIRKGLPSKLYEEICGLF
YNKVIQDCRYYSYNENLEEVPYDFIEPQAKWGLEISFLPGMTDNVGNTAKQIVREYLI
NKDYIDENVCIKARSSKLILSQATEDDIKQEFNPITEYCTLVYKENGNYWRHYGKLG
GVIPVLDYLDPENFKQLYNENWIPVSSTGMTGETGMTKESTGVISSSNGAKSVNLNV
SDQELEKISR DGIDNGTLGLSLAAMKAIKDYFKLNRNPNYDIELES LAQTWSECHKH
NIFCSPIDEIKDGLYAHYIKRATREINSDICVSVFSDNAGGII FDDDYLIVDKVETHN
SPSALDPFGGAMTGV LGVNRDVVGFGKGAEPIMNTYYFCFAKEAKGKFYRDKERTDEI
LPPKYIMKKVIHGVNVAGNCSGIPTQLGSVYFDDRFCGKPLVFVGSVGII PRNINNA
SHIKGPKNGDKIVIIGGRVGRDGIHGATFSSEALSGNSPSTIVQIGDPITQKKLSNA
IKARDLGLYNAITDNGAGGLSSSIGEMGKDGFEVDLSKVLLKNDGMASWEIWISESQ
RMTLAVPEENLPMFKQIMKKHDVEVCVIGEFNESGKAVVKCPEGKVIMDIETEF LHDG
NPKMHLQTKPWTGEWIATCMT PDRASELPLSSIDVELKEMLSRPNICSKEFIVVQYDH
EVQGSSVLKPLQ GKGRVCSEAIVSRPILSSNKG VVKSQGF GSSYGEIDTYHMAACAI
TAIRNYVAAGNIDHLALLDNFCWCDAYNPERLWQLKRAAEACYDYATAFKAPFISGK
DSMFNDFKGYDENG EKVMISAPPSLLISAIGIIENIENAVSLDVKMPGD LIYVLGETL
DELGRSEYQLYSGIGNNNVPKVD AKSARKLYERYNQAIKDGI IASAIAPNLGGLVIAL

```

```

AKSLIAGDLGAEIDLSLVPIGKIQNTDIINKIIMFSESQSRLVTITPQNQKRFEELF
EGAVYSCIGKVTEKKVLNIKDVLDKDVAC"
/besthit="qcoverage 100 , hcoverage 100 , similarity 99.9
, identity 99.9 , evaluate 0.0 , alnlength 1004 , Bacteria
, Proteobacteria , WP_141457253.1
phosphoribosylformylglycinamide synthase [Wolbachia
endosymbiont of Carposina sasakii]"
gene 18533..21196
/locus_tag="wEsol_01434"
CDS 18533..21196
/locus_tag="wEsol_01434"
/codon_start=1
/transl_table=11
/pfam="PDDEXK_1"
/fullproduct="qcoverage 100 , hcoverage 100 , similarity
100 , identity 100 , evaluate 0.0 , alnlength 887 ,
Bacteria , Proteobacteria , WP_174516936.1 MULTISPECIES:
PD-(D/E)XK nuclease family protein [unclassified
Wolbachia]"
/translation="MGRVFTVNVDESLEFDVLVQHIFSEYEREKIPEIKVILPCKRDVI
ALLNAFKNYNAEKCIILPEIVSLENIDEEDLILNLDVRKVISPIKRTLLLIQFILEWN
RKNNDNFVVDLAYSLPSLLDKIQSTQTTDYDQFNEHSSKKIENFISLLTETWSKTLKGL
EVVDILKHKSDYINNMIISLQKDQYIIFVGIGKDKSLIKAIYDLPFGKIILPNLNLKI
KEKDWKLLDKKHYYQYCLKDLLDYLNVDRRDVSCLNTEIENEITDYVFDTTADLSKVSSG
HVGNIIEVITCDSREEEAQVTSLLIENEGYENISLVVFDKLLAARIACLSRQHSAPEN
YPYITLLLLYSIEVLTSNWSSVSLLSLLKHLVTFGYTQEEYTRILSEFEIEVLRNFST
NGLSDIINAINAHKKLKHKEDILLIISKLEVVFNPLLNIINCPISDVVATHLQCVNML
SGINFSELNGEIGNFTCNFLNACEGVEIKCSLELYNQILTLFLEKEFFSVANDLNKFS
LYHNKVVLILAGFNEAPSFQSPLLNALTREKFSLPSAQEEQGYFFYTLLHNLFCASKVYI
TRSLSHRKPILLQRLIIMLQGSKYPPYRDWLRILNTPCTVPTQPMKPKQTEVRKEKM
QVMSCSAIEKLIRNPYSFYVEYILGLKQLRDLNFKPSMLEFGTMVHNILARYLRNKKS
PMSIARETFSTSQFNFSNMWWIRLQRVIQSFVELDETRSNYVELEKSFSCPIFHIPVR
DAGSCDQYETAGMTNRPQEISLTARCDRVEYLPSPQVAIIDYKLGTPPSNEEVMSGFF
PQLILQALAVEHITKREVSELAYWKLDYDKIKVISIQNYRYKMQLKNDLPGLSNYL
SNSTPFIASPYFDKFLRFNSYKQLERVGEWL"
/product="PD-(D/E)XK
nuclease family protein"
/besthit="qcoverage 100 , hcoverage 100 , similarity 100
, identity 100 , evaluate 0.0 , alnlength 887 , Bacteria ,
Proteobacteria , WP_174516936.1 MULTISPECIES: PD-(D/E)XK
nuclease family protein [unclassified Wolbachia]"
gene complement(21313..21720)
/locus_tag="wEsol_01435"
CDS complement(21313..21720)
/locus_tag="wEsol_01435"
/codon_start=1
/transl_table=11
/pfam="DDE_Tnp_1_2"
/fullproduct="qcoverage 100 , hcoverage 100 , similarity
100 , identity 100 , evaluate 9.23e-96 , alnlength 135 ,
Bacteria , Proteobacteria , WP_196770142.1 transposase
[Wolbachia pipientis]"
/translation="MLKEVDFQHAIKALYADRACDRHKFYKLCNEYDIKTKIPPINNA
AEHPEIDYMSNRNAAIRLIKLYGEDGMKEWKKEVNYGKRSYIEGFFSRLKQIFGFSFR
NKSEINREKELLIKCYLLNKFTDIGMAKFEIVT"
/product="transposase"
/besthit="qcoverage 100 , hcoverage 100 , similarity 100
, identity 100 , evaluate 9.23e-96 , alnlength 135 ,
Bacteria , Proteobacteria , WP_196770142.1 transposase
[Wolbachia pipientis]"

```

gene complement(21902..22243)  
/locus\_tag="wEsol\_01436"

CDS complement(21902..22243)  
/locus\_tag="wEsol\_01436"  
/codon\_start=1  
/transl\_table=11  
/fullproduct="qcoverage 100 , hcoverage 100 , similarity 100 , identity 100 , evalue 1.53e-79 , alnlength 113 , Bacteria , Proteobacteria , AAS13810.1 transposase, IS5 family, OrfB [Wolbachia endosymbiont of Drosophila melanogaster]"  
/cog="COG3293 COG3293 124 Transposase and inactivated derivatives"  
/pfam="DDE\_Tnp\_1\_2 DDE\_Tnp\_1"  
/product="transposase, IS5 family, OrfB"  
/translation="MRTKYTKVKKMWADMGYQGRNLKNHIKEEYDIDIEIVKRPPCRF  
WVHKDTPPELLPTREQGFKVQPRRWVVERTFAWVNRNRRLSKEYDLLTTSTENFIYLA  
MSRVMLKREYA"  
/besthit="qcoverage 100 , hcoverage 100 , similarity 100 , identity 100 , evalue 1.53e-79 , alnlength 113 , Bacteria , Proteobacteria , AAS13810.1 transposase, IS5 family, OrfB [Wolbachia endosymbiont of Drosophila melanogaster]"

gene complement(22354..22734)  
/locus\_tag="wEsol\_01437"

CDS complement(22354..22734)  
/locus\_tag="wEsol\_01437"  
/codon\_start=1  
/transl\_table=11  
/fullproduct="qcoverage 100 , hcoverage 100 , similarity 100 , identity 100 , evalue 1.16e-87 , alnlength 126 , Bacteria , Proteobacteria , AOV87106.1 transposase [Wolbachia endosymbiont of Drosophila incompta]"  
/cog="COG3293 COG3293 124 Transposase and inactivated derivatives"  
/pfam="DUF4096"  
/product="transposase"  
/translation="MRKKYPTDLSEREWARIEKHFRVSYKKGGRPPKYSKREILEAIF  
YVLRGTCQWRYLPNDFPLWKTVYEQFRQWKKQGIFEKMNIEITKYSRRKIGRNEQPSA  
CIVDSQSVKTTEKGGSKAMMEVKK"  
/besthit="qcoverage 100 , hcoverage 100 , similarity 100 , identity 100 , evalue 1.16e-87 , alnlength 126 , Bacteria , Proteobacteria , AOV87106.1 transposase [Wolbachia endosymbiont of Drosophila incompta]"

gene complement(22858..23151)  
/locus\_tag="wEsol\_01438"

CDS complement(22858..23151)  
/locus\_tag="wEsol\_01438"  
/codon\_start=1  
/transl\_table=11  
/product="hypothetical protein"  
/translation="MEEKEINAIPITITVSVKNLKNFYDGLMKSINKYNDDVSDVMTSG  
IVEPLSSTIENIGTKTSEIDVKLKDQLQARLDDIPEIGEAPSLHLHITGGENGLL"  
/besthit="qcoverage 100 , hcoverage 64.6666666666667 , similarity 93.8 , identity 90.7 , evalue 2.19e-53 , alnlength 97 , Bacteria , Proteobacteria , WP\_182158511.1 hypothetical protein [Wolbachia pipientis]"

gene 23336..23683  
/locus\_tag="wEsol\_01439"

CDS 23336..23683

```

/locus_tag="wEsol_01439"
/codon_start=1
/transl_table=11
/fullproduct="qcoverage 100 , hcoverage 100 , similarity
100 , identity 100 , evalue 2.74e-74 , alnlength 115 ,
Bacteria;Eukaryota , Proteobacteria;Arthropoda ,
WP_155968342.1 MULTISPECIES: IS630 transposase-related
protein [Wolbachia]"
/cog="COG3415 COG3415 138 Transposase and inactivated
derivatives"
/pfam="HTH_Tnp_IS630 HTH_Tnp_1 HTH_23 HTH_28 HTH_29 HTH_7
CENP-B_N Pfam-B_14738 HTH_8 HTH_17 HTH_24 Pfam-B_2106"
/product="IS630
transposase-related protein"
/translation="MAYSVDLRERAVSMIEKGKSKVEVAELLEIGIATLYRWLRKKAA
GESLRPSKNGSFIRKIDPKILEEYVKKNPDHTLAEMKQNLGFGINSIWYRLKQLRITL
KKSYSITISRAQSRR"
/besthit="qcoverage 100 , hcoverage 100 , similarity 100
, identity 100 , evalue 2.74e-74 , alnlength 115 ,
Bacteria;Eukaryota , Proteobacteria;Arthropoda ,
WP_155968342.1 MULTISPECIES: IS630 transposase-related
protein [Wolbachia]"
gene 23883..24194
/locus_tag="wEsol_01440"
CDS 23883..24194
/locus_tag="wEsol_01440"
/codon_start=1
/transl_table=11
/fullproduct="qcoverage 100 , hcoverage 100 , similarity
100 , identity 100 , evalue 1.60e-74 , alnlength 103 ,
Bacteria , Proteobacteria , WP_155968470.1 transposase
[Wolbachia pipientis]"
/cog="COG3335 COG3335 132 Transposase and inactivated
derivatives"
/pfam="DDE_3 DDE_1"
/product="transposase"
/translation="MTFKGGCDKEVFNTWLEKMLLPKLPHGTTIVMDNATFHKTPKTK
ELIDNARCRLLYLPTYSPDLNPIEHCWNTIKSRLRPLMHKYTDLQLLVGNTIMEIYHS
F"
/besthit="qcoverage 100 , hcoverage 100 , similarity 100
, identity 100 , evalue 1.60e-74 , alnlength 103 ,
Bacteria , Proteobacteria , WP_155968470.1 transposase
[Wolbachia pipientis]"
gene complement(24277..>24412)
/locus_tag="wEsol_01441"
CDS complement(24277..>24412)
/locus_tag="wEsol_01441"
/codon_start=1
/transl_table=11
/product="hypothetical protein"
/translation="LDEQSKQNKEMIEMLKQIKDDMP EIVQASDFTIVDINND SLLFV
"
/besthit="qcoverage 100 , hcoverage 16.988416988417 ,
similarity 97.7 , identity 97.7 , evalue 1.55e-16 ,
alnlength 44 , Bacteria , Proteobacteria , POG51754.1
MgtE intracellular N domain protein, partial [Wolbachia
sp. wRi_2]"

```

ORIGIN

```

1 gaggttggtcc ggaaactagt aaattcaagc atattccctc tttacataa ccctactcat
61 agctaggtat atgaaattct cagtggatgt tgtgagtaaa tcatactcct tcgatagcct

```

|      |             |             |             |             |             |             |
|------|-------------|-------------|-------------|-------------|-------------|-------------|
| 121  | tctattccta  | ttaacccaag  | caaaagtcct  | ttctacaacc  | catctttcttg | gctgtacttt  |
| 181  | aaacccttgt  | tctcttggtg  | gtagtagctc  | aggtggcgta  | tctttgtgca  | cccaaatct   |
| 241  | acatggaggc  | cttttaacaa  | tttcaatatc  | tatgtcatat  | tcttccttta  | tgtgattcct  |
| 301  | taaatttctt  | ccttggtatc  | ccatgtcagc  | ccacattttt  | ttaacttttag | tatatattgt  |
| 361  | tctcatattg  | tttaatgcta  | ttttaatacc  | atctctatca  | ttttcgttag  | cagcgcctac  |
| 421  | gtaacaacct  | agtataaaac  | cctgagtgtc  | tgtaattata  | tgcccttttc  | taccctttac  |
| 481  | ttttttactt  | ccatcatagc  | ctttgatccc  | cccttttctg  | tagtctttac  | agattgacta  |
| 541  | tctactatac  | aggcactcgg  | ctgctcattc  | cttcctattt  | ttcttctact  | atattttgta  |
| 601  | atttcataat  | tcattttctc  | aaaaattccc  | tgcttcttcc  | attgcctgaa  | ctgctcatac  |
| 661  | acagtcttcc  | atagcggaaa  | atcatttggt  | aaataccgcc  | attgacaccc  | tgtacgcaat  |
| 721  | acatagaaaa  | ttgcttctaa  | tatttctctt  | ttgctatact  | ttggcggcct  | tcctccttcc  |
| 781  | ttgtatgata  | ctctgaagtg  | tttttctatt  | cttgccatt   | ccctttcgct  | tagatctggt  |
| 841  | ggatactttt  | ttctcatctt  | taccccgtag  | taaaatttca  | gatattatag  | ccttttactt  |
| 901  | atttccggac  | aacctcttag  | ctgcttgctg  | ttttaacat   | agtgcgtgtt  | tgttcaatgc  |
| 961  | cctcacgcgt  | gctttttcca  | cttttttcc   | ttcagcattt  | acattttcaa  | ttaccttatt  |
| 1021 | aatattatcg  | gtaacttcta  | tattaataga  | catttttacac | ccccgatgct  | tgaattttcc  |
| 1081 | ataccattcc  | tgaattatct  | ctaagtggtg  | gtgtgtgtac  | tctgtatcta  | caactaccta  |
| 1141 | tggaaaaagt  | atctcctacc  | attggcttta  | atacatcaaa  | cacacttact  | tccaacaata  |
| 1201 | aaatttctcc  | tacaaattgt  | ccttcaccaa  | tctcgtataa  | tttatctggc  | tgttgcttta  |
| 1261 | gtacttgtac  | catatatgac  | ttatcctttg  | attcatacaa  | agctactttt  | cctaaatggg  |
| 1321 | caaaacaatc  | ttgcaataat  | ctcttaatat  | tttcttgcat  | atttttctgc  | tataactaa   |
| 1381 | cctttacatg  | ctaagaagg   | gcacacaggt  | aaagcattct  | tctgcctcac  | cactttatag  |
| 1441 | ttgctctacc  | tgtgttggtt  | tggtacaacg  | acttttacta  | atactcccg   | tctatggcac  |
| 1501 | attggcagag  | aatttgactg  | agtatgtaaa  | tcgggtccctc | tatcaaactc  | tcttggctct  |
| 1561 | tgtttcgctg  | aaagtggctg  | tccaagagta  | tttactgtct  | cattaaagtc  | tgctgggtgca |
| 1621 | aaatacgttg  | taaatgtgct  | cgctgttcct  | agtggaaaac  | agtttccact  | ttctctttct  |
| 1681 | ataaatcttc  | ttacggttcc  | ttcagggctg  | gttgcttgcc  | ctctatactc  | ttcaaagtgt  |
| 1741 | attccacaga  | acgtaaatcc  | tgatctcatg  | tcattcctca  | gcgctgctcc  | ttcttgccat  |
| 1801 | ctttcatatg  | cctctttcac  | tttactatgc  | gaaattagtg  | catcaaaaaa  | ctctggactt  |
| 1861 | accagtgcac  | gaatccccgt  | catatattca  | ccacttaaat  | tgtcctcaac  | atggcgcaat  |
| 1921 | acttcagac   | acttacgctt  | tacatcggtt  | gtcgcagtcc  | ccaatgcaaa  | atttactact  |
| 1981 | tttgggtgtaa | tttcaaattc  | gttgtaaagg  | tttaataact  | ccgacccatc  | agcatcaaga  |
| 2041 | atgattccct  | tcagcgctcc  | cattctcaaa  | tgttctaacg  | ttattgcgtg  | tttatttctc  |
| 2101 | attagctgca  | aatgatcagt  | tattacatct  | gccaatgctt  | tcagttcact  | ttctgaccca  |
| 2161 | aatgccctta  | ttccctgtac  | ttcctcaggc  | aacactacgt  | catcatgtgg  | tatatgtgga  |
| 2221 | atggtaaaag  | ttcttatttt  | tcgttttcca  | cgttttccta  | ctggtgctgg  | tgctcctggg  |
| 2281 | aactgcgttg  | gtagtaaaact | taataactcca | ttttgctcct  | ctatagtaat  | atgtctaaat  |
| 2341 | cttactgacc  | tacttggaac  | caaattttaa  | ttttcaactc  | gtccataatt  | tatcggcaat  |
| 2401 | atattttatcg | catttggttag | tgccgtcatg  | ctaaatgctg  | tatttgtaaa  | tggattttgc  |
| 2461 | attttttctt  | ttcccccttt  | tgtattttta  | atagtttttt  | taagctccct  | tgcggataat  |
| 2521 | gatccctcgt  | ccttcaagg   | gctttattgc  | tgacgttttc  | tgctcttcaa  | tgatatttgc  |
| 2581 | tggccataca  | actgcatgat  | ctgctagtat  | tgcaaccacga | gcaataatta  | ctcctttact  |
| 2641 | attttccttt  | gcggtttacat | cgcttgctat  | cactcctata  | gccgtttgtg  | tcccatctgt  |
| 2701 | ggcagttgga  | tttaaagctt  | taataaaacc  | atcttttagta | tcataaccaa  | ctacttttcc  |
| 2761 | cagcttttaga | ttttgtccct  | tggtactagt  | tatttgatct  | cttgaatata  | ggttggacac  |
| 2821 | ttcatatttc  | agaagatcgc  | ctaaattatt  | tccttcagtt  | atacttatca  | tgtcttttcc  |
| 2881 | tctccttttt  | ttattttttt  | accgccatat  | ttgtggttgt  | tatacacggc  | ggttatacac  |
| 2941 | atacttttaa  | tgtttgattg  | cgcacgactt  | ttcgctacct  | gcacatcaaa  | ctcttctcct  |
| 3001 | gaattctgtg  | gtattgcaact | tagtattttct | gtcttcttcg  | ttcgctctgc  | aagtaactcc  |
| 3061 | attaaaactt  | ccctggcttg  | ctcaacactt  | acgctttgct  | caataaattc  | tcctatcttt  |
| 3121 | tctggcattc  | gtgataagtt  | acataaacgt  | attaattcaa  | gaacttcagt  | acgatactta  |
| 3181 | gttaaattgt  | cagtttctag  | gtcatttgta  | gttttttcat  | tcatagtaat  | atcccccttt  |
| 3241 | ttattaatag  | atttaaaactc | tgaaagaatt  | gtaattccat  | ctgcaagacc  | tatttctact  |
| 3301 | gctttctcgc  | caaaaatatag | ccctgcttct  | gttgatttta  | ttgcctctac  | agaaagggtt  |
| 3361 | ctattgcgtg  | ctattagctc  | aaccagcatt  | ccatataaac  | gattcacttc  | gctttttagg  |
| 3421 | ctttctaaac  | tctcagaagt  | tattggctca  | tggtggattta | aatcattttt  | tctacttctt  |
| 3481 | gcaaatactg  | tcgtatatatt | tattccctgt  | ttttcatcaa  | accacttttg  | atctatatga  |
| 3541 | cttgctatta  | ctcctatgct  | tccaactcct  | gaagttctag  | ttaccaatac  | tttttcagca  |
| 3601 | cttgatgcaa  | ttgcatacgc  | cgcagaatac  | gcacatcat   | ttgctattgc  | cacaatcctc  |
| 3661 | ttttttctcc  | ttgcttggtg  | aataaagtcg  | gaaaggctcg  | ataaaccggt  | tacttctcct  |

|      |             |             |             |             |             |             |
|------|-------------|-------------|-------------|-------------|-------------|-------------|
| 3721 | ccgggggctgt | ctatgtccaa  | aattattggt  | tctacttctt  | tatctattaa  | agcttcttct  |
| 3781 | atctcttcac  | ttatcttctc  | atacgatgtc  | atcccaaata  | catcatcaaa  | aacttctgac  |
| 3841 | tttttcgtca  | agattccatg  | tattgggtatt | attcctcttt  | cactattttct | taccgcatgt  |
| 3901 | tttatatttt  | taaagatagg  | ctgcttttct  | gtttgtagt   | acagtaattc  | aaaactcctt  |
| 3961 | ggttctacca  | ttacacatct  | gtttagccat  | atcgcttggt  | ttttcatatt  | atctcttgat  |
| 4021 | tagtagtaac  | gtcggaatca  | aaacttaaac  | ccaagggaact | agcacgtctt  | tgatcttctg  |
| 4081 | caatttcttg  | gtctattttct | tctacatcat  | aacctagctc  | tgaaaccact  | tctgatcgac  |
| 4141 | tcttaaatacc | atcttcttact | gccatttggt  | gtgcttgctg  | gtctttttaa  | ggatccaccc  |
| 4201 | aatcaaatacc | ctgtgggtatc | catttttactt | cttcttttcgc | tgctttttgct | acttttttat  |
| 4261 | ctatactcag  | ttctccacag  | agtactgcta  | attctagcca  | tctactccat  | actggctcgc  |
| 4321 | aaaattgaaa  | taccataatg  | ttgtgttgca  | gcatagcaca  | tctacgacga  | aactctatta  |
| 4381 | atcctgctcg  | aatggatgaa  | taattaacgc  | ccgttaaatac | tcctgttagt  | tgctcatatg  |
| 4441 | ttatccctgt  | gcctattgct  | attgccctca  | gctgctgtct  | catgaatgct  | tcataacttc  |
| 4501 | ctcctacatc  | agatggctct  | gaaaatttta  | tgtcttctcc  | tgggtctaaa  | agctgcattg  |
| 4561 | ttcctggctc  | taaacctgat  | agtgtactc   | cttgctcatt  | actttcacct  | tctcctaaaa  |
| 4621 | tatttgcttc  | aggatcgagc  | cttgtaataa  | accctgcaaa  | catcgctgct  | gtcttttttc  |
| 4681 | tcactaattc  | tgcacatca   | tattgatcaa  | gttcatagag  | ctttagcagt  | atactcgaaa  |
| 4741 | gccatggctc  | tcctctaatt  | tgcccaggtc  | ttaatgggtct | ataaatatgt  | aaaacatcat  |
| 4801 | ttgctggcac  | tctcactgat  | tcaccaaata  | agccttcacc  | aggggtgttct | ttaaataagg  |
| 4861 | aatatgcttc  | tctttgcca   | agcttggtta  | actcaatccc  | gtttcttatt  | acattaccat  |
| 4921 | ttcctaaagt  | ttgatttggt  | ttattatcta  | aatgttcaga  | ctcaagtact  | tgcagttgta  |
| 4981 | atggcacaga  | aaatctatct  | tccagctttc  | tcgttcttaa  | acgtacaaaa  | cattctcctc  |
| 5041 | cctctatcat  | acttctgcat  | actagagctt  | gtaatccata  | aaaatcactt  | actccgttac  |
| 5101 | tgtctgcttc  | atctgtccat  | cttagccata  | attcttgcac  | cctctttcga  | aattcccat   |
| 5161 | cccttgcttt  | tgattgcggt  | tttattcctg  | ttccaataga  | gttacttact  | attgtatcaa  |
| 5221 | taatatattg  | tgcataatga  | ttttttctca  | ccatatcacg  | tgatctacta  | cgtaaagt    |
| 5281 | caaggttttg  | agacagcaaa  | ttgtttatac  | ttcctaactc  | tggttgaaag  | tgaaaaaatc  |
| 5341 | ttcttcctga  | gcctgcagca  | tcccaggctg  | agctttttat  | ctttgggttg  | ttaaataagt  |
| 5401 | gtttgaatga  | ttttaataac  | attttgccctc | tttgattatg  | caacaagt    | ttgcacaatt  |
| 5461 | tgacattgaa  | aaattatagc  | aagttgctag  | agaatttggt  | caacagattg  | tatgtagaga  |
| 5521 | gtcattactc  | tggactacgt  | ttataaattt  | cttttcgatg  | tcctattgct  | gcaattttga  |
| 5581 | ccatgtgctc  | tgagttatct  | attaagtata  | tgactcgata  | atcgccaaca  | cgcaacctaa  |
| 5641 | agtagcctac  | ccatttatgc  | gataaagcct  | cacctacttt  | atcaggaata  | attgtgagac  |
| 5701 | gtttttctat  | agctttttgc  | acccttaacc  | gtattgtttt  | cggaagagaa  | ggaagatctt  |
| 5761 | cggatatctac | accttctaaa  | taaccaattt  | ggtaaattat  | tcccacttga  | tatcttcatg  |
| 5821 | tctaattatt  | tttgctccag  | gaacattacg  | tttagcagca  | agttcaagta  | gagctatttc  |
| 5881 | tccttcatcc  | atcttcgtcac | cttcagatag  | tttacttacc  | tcaagtctct  | cttctactag  |
| 5941 | atctttttaca | atcttctcaa  | tagttctatt  | ttgaactttt  | gccattttctg | taagatactg  |
| 6001 | agcaaattcc  | ccctcaaaaat | ttacattaac  | attaagcctt  | ccttgacttt  | gatccatatt  |
| 6061 | attcactgta  | agatatcaac  | tctaaactat  | aacatttttta | cataattttg  | tcaaccctt   |
| 6121 | tatttgttga  | aaaaacaatt  | tttctctttg  | gcttcatacc  | tgcaattttc  | aattcagcct  |
| 6181 | taatacgttg  | tcttaagctt  | agtaaatacat | ttatatctac  | ttcagcatat  | ctcaccacat  |
| 6241 | ggtcaccata  | tgcaattgat  | actactcgct  | ctccgttttg  | tagtttcttt  | atcgcttctt  |
| 6301 | cgacttgaat  | tagataatct  | tcgttatata  | tttactactc  | gctgatccat  | ttgcttttca  |
| 6361 | ctatttttctt | tgattttttta | ctttctgggt  | tttcaactta  | actattccat  | ttactctctg  |
| 6421 | gccatctatc  | tattcccagt  | gctatcgatg  | ctgctcttgc  | ataaatccta  | cagtctaata  |
| 6481 | cttcattttct | ttctcttacc  | ttttgccact  | cttggttggt  | ataacctttt  | actactttgc  |
| 6541 | tgactaattg  | ctctgccgtt  | agctgcttaa  | aatattcagg  | tgcatactcg  | ggaaaatgac  |
| 6601 | agtatcctgc  | tggagcttct  | tcaccgtcct  | ttaaaacatt  | aagtaattga  | aaaagtctg   |
| 6661 | actttaaaaat | cgatactccc  | actggccaga  | gctttattcc  | tcttttttagc | ttttgaccac  |
| 6721 | caactgttat  | atctactcta  | cttgggctgc  | taagtgggtac | tagagcttta  | tttacacctt  |
| 6781 | tactgccat   | tactcttcca  | gagccttgat  | gacctcttac  | ccaattgtat  | acttcttggtg |
| 6841 | tcgcataccc  | agcatcaacc  | gccatcatac  | ttatcatgta  | ttcaagacca  | ttttcaccca  |
| 6901 | taaaatgatg  | atttaagagc  | tcagagagtt  | ttccccatac  | ttctcctctt  | ccagtatcac  |
| 6961 | cttcaaatac  | tcggtattct  | attgaccaac  | tttcgcggct  | ttttcccat   | gctacaactt  |
| 7021 | ctacttctaa  | acgatctttt  | tggacatcta  | ctcctgcagt  | aagcaccact  | tctctcctag  |
| 7081 | gtactgtgcc  | tacgggaaaa  | aattctctcc  | tgttaaaata  | ttgcttccaa  | tctgggtactt |
| 7141 | ctcctttgtc  | taccaggtt   | tctccaagcg  | tagtatttat  | ccatactttt  | agtaattggt  |
| 7201 | cacttttctt  | tgcataga    | aaatcttcta  | ctgcttgagt  | ccagctatac  | cagcctactg  |
| 7261 | gactataaag  | acttgaaa    | tgaaatcctt  | ttttctcacc  | ttttactcta  | ttagtaggtc  |

|       |             |             |             |             |            |             |
|-------|-------------|-------------|-------------|-------------|------------|-------------|
| 7321  | tccattctcc  | acgctcaagc  | atctctgtct  | tttgatgatt  | ttctattttg | ccgctacatt  |
| 7381  | cagtgcagac  | ataatgtgct  | gttcttgagt  | cgttgttttc  | ccatttaatt | tgtgaccatt  |
| 7441  | ttagaacttg  | atagtaatta  | caatacggac  | atggtacaaa  | aaagtactgc | ttatctgttg  |
| 7501  | cttcaaattc  | tttctcaatt  | ctgcttattc  | catgaatcgt  | tggtgttgat | actaaaaaaaa |
| 7561  | tctttcgccg  | tgcagatgta  | ttagttcgag  | caatactgag  | cagcactgga | tctccttcac  |
| 7621  | cacctgaatc  | tcctggatag  | gcgtctattt  | catcaagaaa  | gagatatttt | actggcatag  |
| 7681  | acctcagtc   | tacactgctg  | tttgctccag  | ttattactac  | tattccacct | ggaaattcct  |
| 7741  | tactttgtac  | agtattgcct  | gagtcctctg  | accttgggtc  | ttttacttta | ctctttaaac  |
| 7801  | atggcgctact | ctctattaac  | ggcgcaaate  | ttccttttga  | ccaacgcttt | cccatttcaa  |
| 7861  | ctgttggctg  | cacaactaac  | attggaccag  | gagtctgata  | tataatatag | cctatccaat  |
| 7921  | tgttaccagc  | ttctgttcct  | ccaatctgcg  | ctcctttcat  | gaatactact | ttttctgctg  |
| 7981  | gtgaggacgg  | agaaagtga   | tccatgattt  | cttttaaata  | aggagtctct | tctgttctcc  |
| 8041  | atttacctgg  | ctctgatgct  | gcagttggcg  | ctaaaactcg  | atactcattt | gccactctg   |
| 8101  | atactttaag  | ctctggatct  | ggttttaaac  | cttcagagaa  | agatgtggcg | tatatcatat  |
| 8161  | cgctagctct  | tcacatcat   | tagatgatac  | ctcaacatca  | cttaaaatag | aactgcactc  |
| 8221  | acttgttttc  | tcactttcga  | gttcaataaa  | cattttcttt  | tcaagtgcct | cttctatgta  |
| 8281  | cttctgagtt  | aaattactca  | ttgctattgc  | agctatgagc  | gcaactattc | ccaccattac  |
| 8341  | cgcagctata  | atggttaggg  | aaattcccac  | tatcactatt  | gcacatactg | ttatagaaac  |
| 8401  | acagacgata  | ttgatataat  | tctttatttt  | tttgtctgct  | attttccttt | cttcaaaata  |
| 8461  | tttattgctc  | aataaatgaa  | atggttgaaa  | gttcttctgt  | cttccaaata | acactatttc  |
| 8521  | cttctctttg  | ctcagtaatt  | ttattaattt  | tgcgttgttc  | gttattattg | catactgaaa  |
| 8581  | aacatccgtg  | gcactctgctc | ctctcttttag | caacaacttt  | actacgttaa | agtgaccatg  |
| 8641  | ctttacagca  | acataaattc  | ccgtttttcc  | actctcatct  | acagcatcta | tttcaactcc  |
| 8701  | ttcaccaaga  | ataccgtcta  | ttaggtcttc  | atatcctttt  | ctggcagcta | aatgaagcaa  |
| 8761  | actgttttta  | tcagctccgt  | atctattact  | tgctaaaatc  | tttactatat | ctaactctatt |
| 8821  | tgcttctttt  | gcataacaaa  | atggtgtctt  | gccattatca  | tccttaatta | aaggatctat  |
| 8881  | atcttctcgc  | gttagtaaaa  | cttctattgt  | tttcagcctt  | tcagcataat | gtagtggcgt  |
| 8941  | tttattttca  | taatcttgta  | agttaacccc  | agcattagga  | acatttatta | agcatcttac  |
| 9001  | aatatctaaa  | cataagtccc  | tttcgctgta  | attagaggtt  | gtccggaac  | tagtaaattc  |
| 9061  | aagcatattc  | cctctttaac  | ataaccctac  | tcatagctag  | gtatatgaaa | ttctcagtgg  |
| 9121  | atggttgtag  | taaatcatac  | tccttcgata  | gccttctatt  | cctattaacc | caagcaaaag  |
| 9181  | tcctttctac  | aacccatctt  | cttggtctgta | ctttaaaccc  | ttgttctctt | gttggtagta  |
| 9241  | gctcaggtgg  | cgtatctttg  | tgcacccaaa  | atctacatgg  | aggcctttta | acaatttcaa  |
| 9301  | tatctatgtc  | atattcttcc  | tttatgtgat  | tctttaaatt  | tcttccttgg | tatcccatgt  |
| 9361  | cagcccacat  | tttttttaact | ttagtatatt  | ttgttctcat  | attgtttaat | gctattttta  |
| 9421  | taccatctct  | atcatttttcg | ttagcagcgc  | ctacgtaaca  | acctagtata | aaaccctgag  |
| 9481  | tgtctgtaat  | tatatgcctt  | tttctaccct  | ttactttttt  | acttccatca | tagcctttga  |
| 9541  | tccccctttt  | tctgtagtct  | ttacagattg  | actatctact  | atacaggcac | tcggctgctc  |
| 9601  | attccttcc   | atttttcttc  | tactatat    | tgtaatttca  | taattcattt | tctcaaaaat  |
| 9661  | tccctgcttc  | ttccattgcc  | tgaactgctc  | atacacagtc  | ttccatagcg | gaaaatcatt  |
| 9721  | tggtaaatac  | cgccattgac  | accctgtacg  | caatacatag  | aaaattgctt | ctaatttttc  |
| 9781  | tcttttgcta  | tactttggcg  | gccttcctcc  | tttcttgat   | gatactctga | agtgtttttc  |
| 9841  | tattcttgcc  | cattcccttt  | cgcttagatc  | tggttgatac  | ttttttctca | tctttacccc  |
| 9901  | gtactaaaat  | ttcagatatt  | atagcctttt  | acttattttc  | ggacaacctc | ttacaatctt  |
| 9961  | gttaaatact  | ctagctactg  | cattagcaca  | atcttgcccc  | atcttcaaaa | atatgtttga  |
| 10021 | ataattaacg  | aatgattttg  | tatccgtttt  | aaaacaatag  | tcccctgtta | tttttgacaa  |
| 10081 | taacttgact  | ggaaagtatg  | acaaacatgc  | cactatcaaa  | aataaagggt | gcaatattat  |
| 10141 | gttggtgctg  | aaaacagcac  | ccagtgtaca  | caatgaatac  | actccctctg | ctctgtggcc  |
| 10201 | cacgtattca  | catttatcat  | tatcttgata  | atacttggtta | taattgtctt | tactctcaac  |
| 10261 | tccacaaatt  | acatctttca  | caggtcctag  | cacattatca  | acgtaacgta | cagatttata  |
| 10321 | gaaactat    | tctggaaacta | tagtacttcc  | caaagtaaat  | gataaaggta | taataagcta  |
| 10381 | tttgagttat  | aatggcggtat | agtgtggatt  | taagggaag   | ggcagtatcg | atgatagaaa  |
| 10441 | aagggaagtc  | aaagggttag  | gtggcgagag  | ttttggagat  | aggaatagca | actctgtacc  |
| 10501 | gctgggttaag | aaagaaagcc  | gctgggtgaaa | gcctaaggcc  | atcgaaaaac | ggcagcttta  |
| 10561 | ttcgaaaaat  | agacccaaaa  | atactcgaag  | aatatgttaa  | aaagaatcca | gatcatacgc  |
| 10621 | tggcagagat  | gaaacaaaaat | cttggttttg  | gaataaattc  | aatttggtat | aggctgaaac  |
| 10681 | agctaagaat  | tacttttaaaa | aaaagttaca  | ctatatcaag  | agcgcaatca | agaagatagg  |
| 10741 | cagcgattta  | ccgataaaaat | ctcaaaaata  | gaccattcca  | gcatcttata | tatagatgaa  |
| 10801 | gcaggagttg  | ataatagggt  | ataccgagag  | tatggacgtg  | ctccaatagg | aaagaaaatt  |
| 10861 | tatgcagata  | ttccaggaag  | aaaacgagag  | agaatcagta  | taataggcgg | gtggattgga  |

|       |             |             |             |             |             |             |
|-------|-------------|-------------|-------------|-------------|-------------|-------------|
| 10921 | aagagattta  | ttgcaccaat  | gactttcaaa  | ggtgggtgtg  | acaaagaggt  | attcaataca  |
| 10981 | tggtttagaga | agatgttatt  | acctaaattg  | ccacatggta  | ctacaatagt  | tatggacaat  |
| 11041 | gccacattcc  | ataaaactcc  | caaaacaaag  | gagttaatag  | ataatgctag  | atgccgtttg  |
| 11101 | ctctatctac  | caacataattc | accagatttg  | aaccctatag  | agcattgttg  | gaataccatc  |
| 11161 | aaaagccgcc  | tcagaccttt  | aatgcataaa  | tatacagact  | tacaactttt  | ggttggtaat  |
| 11221 | accataatgg  | aaatttatca  | ttcatttttag | aaaatactat  | agtgtgttat  | cttctgcttt  |
| 11281 | cttagcaggt  | acaactccat  | attcaacgta  | cctttttaaag | tatcgatata  | ctgacattac  |
| 11341 | cctctccaaa  | tcataaatat  | gcaacatagt  | caataatgat  | taagaaatag  | tttataataa  |
| 11401 | atatgtttta  | agatacctgc  | ctgtaacact  | ttctggaatt  | tttaccactt  | cttctggagt  |
| 11461 | tccagtagca  | atcactttctc | cgcctttttat | tccgccctct  | ggtccgatgt  | ctattatata  |
| 11521 | atctgcagtt  | tttataacgt  | gcaaattgtg  | ctcgataact  | ataacagtgt  | ttccagatc   |
| 11581 | gactaatcta  | tggagtattt  | ttagtaagtt  | atttatatct  | tcaaagtgtg  | atccagttgt  |
| 11641 | tggttcatca  | agaatataca  | atgttcttcc  | ggtaaactcg  | tttgatagct  | ctttagatag  |
| 11701 | ctttattcgt  | tgtgcttccc  | ccccagacaa  | cgttgttgac  | gactgtccga  | gttttatata  |
| 11761 | gccaaagtccc | acttctctgca | aagaaaccaa  | cttttctttt  | accattggaa  | ggttttcaaa  |
| 11821 | aaaaacacaa  | gcttgatcta  | tcgtcatatc  | aagcacatca  | gagattgatt  | tttctttata  |
| 11881 | agtaacttcc  | aatgtttccc  | gattatacct  | tcgcccttta  | cattgctcac  | acttcacata  |
| 11941 | aacgtccggt  | agaaaatgca  | tctctatctt  | taagtgccca  | tcacctttac  | aagcctcaca  |
| 12001 | ccttccccct  | ctggtattaa  | atgaaaaccg  | gcctatatta  | tatccccctg  | cttttgactc  |
| 12061 | cgaaagacct  | gcaaaccaat  | ttcttatatg  | agtgaacata  | ccaacatatg  | ttgctggatt  |
| 12121 | tgacgcagga  | gttctaccaa  | ttggcgactg  | atcaacttct  | ataactttat  | ctatatattc  |
| 12181 | aaggccttct  | attctatcac  | actgaccata  | ccttgcagac  | gaatgatgta  | tcttatgtgc  |
| 12241 | tgaatattta  | tataacgttt  | ctatgactaa  | acttgatttt  | ccccctcctg  | atattccagt  |
| 12301 | aacacaaata  | agattcccta  | taggaaattt  | aacgttcaca  | ttttttaagt  | tattttcaca  |
| 12361 | tgcatthatt  | acttttatga  | actgagttgc  | ttgctttctt  | ctccttgga   | ttaaaatttt  |
| 12421 | tttctctcca  | ctcaaatatt  | gccctgttat  | gtcctccgaa  | tttctttgca  | cctggtctgg  |
| 12481 | tgttccttct  | gcaacaactt  | ttccaccatt  | tacgccagct  | ccaggaccaa  | tatcaatcgc  |
| 12541 | ataatcgaca  | gccattattg  | tatcttcac   | atgctcaaca  | acgattacag  | tgttaccat   |
| 12601 | gtctcttaag  | tttttttagtg | tggcaattaa  | ccgatcatta  | tcacattgat  | gaaggccaat  |
| 12661 | cgagggttca  | tcaagaacat  | ataaaacccc  | cgtaaatcct  | gagccaattt  | gcgaagcaag  |
| 12721 | tctgatcctc  | tgactctcgc  | cgccagagag  | agtgctagat  | tctcgatcaa  | gcgttaggta  |
| 12781 | attcaaccct  | acattcttta  | aaaatgttag  | cctcttgatt  | atttcactta  | gtattttatt  |
| 12841 | tgagattttg  | ttctgttggt  | ctgtgagctt  | gtctggcaaa  | ttttcaaacc  | acttaaggga  |
| 12901 | ttcatcgata  | ctaagccctg  | atatttcacc  | tatatgtttg  | ctatcaattt  | ttactgtaag  |
| 12961 | cgcttctttt  | ctcaatctat  | agccagtgc   | ttctctgcag  | tgagtaacag  | agcaatatcg  |
| 13021 | ctcaacaagc  | gtttcatcat  | aatccatctg  | gtttttctaag | atactgacca  | aaccttgaaa  |
| 13081 | tttaccgaag  | ccaaagagta  | tcatatcttt  | tacttcttga  | tctatgttct  | tccacggaac  |
| 13141 | atcaaggcta  | aattttacaat | tttcagccag  | tgatagaatt  | gcacttttta  | aaaatccata  |
| 13201 | acctgtgtgc  | acttgacgga  | acattgatcc  | cactggcttt  | aaagcgcctt  | cagatattga  |
| 13261 | aagagtttca  | tctggcacta  | tcagcttcac  | atcaatagcc  | agctttttac  | caagcccatt  |
| 13321 | acacgaacca  | catgcaccgt  | aagggtgtgt  | aaaagaaaat  | aatcttggtt  | ctatttcttc  |
| 13381 | aagagtga    | ccagactcgg  | ggcatgcaaa  | attctctgaa  | aaagtcagaa  | tttgaccatt  |
| 13441 | tttatactcg  | gaatgatggt  | tgtcaggtag  | gtttactatt  | tctacataca  | ttagaccatt  |
| 13501 | accaagtttt  | agtgcggatt  | ctatactact  | tggcagtcga  | tttcctatat  | cgcccaatat  |
| 13561 | tgatatttcta | tctgcaacca  | caaaaatgtc  | gtgtttcttg  | ttcttatcga  | gttttaggcaa |
| 13621 | gtcatctaca  | ttgtacactt  | caccatctat  | tttgaacctt  | acgtaacctt  | gtctttta    |
| 13681 | ttccaatata  | tctttaagat  | gttctccctt  | tctaccacgc  | acaacagggg  | caagtatata  |
| 13741 | tatcttagtt  | tctaaaggta  | acgcaattat  | agtatctaca  | atttgagaca  | ccgtttgttt  |
| 13801 | tgttattggt  | aatccagttg  | caggtgaata  | aggaactcct  | attcgtgcat  | atactaagcg  |
| 13861 | caagtaatcg  | taaatttcgg  | taacagttcc  | aactgttgac  | cttggttttt  | ttgagatcga  |
| 13921 | tttctgggtg  | atagatatgt  | caggagagag  | acctgtaatc  | gactcaacat  | ctggtttatc  |
| 13981 | ctgaatgttg  | agaaattgac  | gcgcgtaagc  | tgacaggctt  | tcaacgtacc  | ggcgttgggc  |
| 14041 | ttctgcataa  | atcgatcaa   | atgcaaggct  | agacttgcca  | gaaccactta  | gcccagttat  |
| 14101 | aacaactagc  | ttattttttcg | gtatattgac  | gtctacacct  | tgacagattat | gttcccttgc  |
| 14161 | gcccttaact  | ctgataaaaat | cgtccatatt  | ataccatata  | gcgtatttaac | cattatagcc  |
| 14221 | tcaaaatacg  | tgaattttata | gtgatataatt | gatttttttca | actgttacgg  | agaattaagc  |
| 14281 | agcgtttgat  | aaatcgatcat | tccgctactt  | gttagcggct  | gagataccgc  | gacgggtatga |
| 14341 | cggttaagta  | ggccagtgcc  | cctatgatgt  | catcccagtg  | tcaagcacat  | agctgtacga  |
| 14401 | acgttgtagt  | ttaggagcaa  | ttcccaccag  | tgggccagtg  | cccagacact  | ggttctatgc  |
| 14461 | aacttaatta  | aaaacgtttg  | ttttagcgta  | agacaactac  | cttttagctca | tcagctcagt  |

|       |             |             |             |             |             |             |
|-------|-------------|-------------|-------------|-------------|-------------|-------------|
| 14521 | tataagcaaa  | atctctggat  | tccagactgg  | aatgacacca  | tttgctgtgc  | aatttacctt  |
| 14581 | caaaaatgaa  | tgctcgtaga  | gctatgtgtc  | aagcactggg  | atgacacccat | tcttttttct  |
| 14641 | ggattccagt  | gtctgggcac  | tggaatgaca  | ccccctgat   | aggctcaaat  | catagtgttt  |
| 14701 | gtacagttgt  | gggttttagc  | tacctataaa  | ttctaaactg  | ttgttacgta  | ttaggaccac  |
| 14761 | caaatacacc  | cccaggaccc  | aaagtcagtt  | tagctatatc  | agaaaacagg  | ttatgtggaa  |
| 14821 | atcttaaaat  | acttcttggt  | cgccaagcaa  | aataaataca  | ttcctacaaa  | caagcagatg  |
| 14881 | ctcaatactg  | acacataaga  | aaacttaaaa  | attaaatctc  | taatgtatat  | tgataagcat  |
| 14941 | ttacctgcag  | aaaatttgta  | tagtaatcca  | acacatacaa  | cggcactatc  | aaccactgat  |
| 15001 | gctataatta  | aagtaatgaa  | atctgccata  | tgaaaattca  | acttggaactt | caattttttca |
| 15061 | aaaataatta  | tgcttgagag  | aagagatact  | aaaattgcag  | tatatgaaat  | caatatcatc  |
| 15121 | aaattaaaac  | tttgccatct  | aaaaacacaa  | catagcgcta  | tacacactat  | taagttgtac  |
| 15181 | gtagctttgc  | ttctgccata  | aaattcaacc  | attgaattta  | caactaaagc  | agctcccaca  |
| 15241 | aataaggcag  | cacatatcat  | caattttattt | gaagtgttga  | gtaaagaaag  | actgataaac  |
| 15301 | aggagtatcg  | ataaaataga  | cataattacc  | tacccaaaat  | taataacata  | cattcattct  |
| 15361 | aaataaacat  | tacatatagt  | aaaagagtta  | tttagcataa  | taagaaaaat  | atctttatatt |
| 15421 | agcatgccac  | atctttcaga  | tctactttta  | aaacatcctt  | tatgttttagc | acctttttct  |
| 15481 | ctgttacttt  | gccaatacat  | gaataaaactg | caccttcaaa  | caattcttca  | aacctcttct  |
| 15541 | gattttgtgg  | tgtaatatga  | accaaatttc  | tactttgcga  | ttcagaaaac  | attattatct  |
| 15601 | tgttttattat | gtctgtattt  | tgtatttttc  | ctattggcac  | tagtgaaaga  | tcgatttcag  |
| 15661 | caccaaggtc  | tcctgcaatt  | agcgattttg  | ccagagcaat  | aactaatccg  | cctaagtttg  |
| 15721 | gtgcaattgc  | agaggcaatt  | atgccatctt  | ttattgcttg  | gttgtaacgc  | tcatacaact  |
| 15781 | tcctagcgct  | ctttgcatca  | acttttggtg  | cgttgttatt  | acctattcca  | ctatataact  |
| 15841 | gatattcaga  | tctaccaagt  | tcatacaagt  | tttctccaag  | cacgtatat   | aagtctccc   |
| 15901 | gcattttcac  | atcaagcgat  | accgcatttt  | caatatatttc | tataattcca  | attgctgaaa  |
| 15961 | tgagtaatga  | aggtggtgca  | gatatacatca | ctttctcgcc  | atcttcatca  | tatcccttaa  |
| 16021 | agtcgttaaa  | catactatct  | tttccggata  | tgaatggtgc  | tttaaagtgc  | gttgcgtaat  |
| 16081 | cataacaagc  | ctctgcagct  | ctcttttagct | gccatagcct  | ttctggatta  | taagcgtcac  |
| 16141 | accagcaaaa  | gttatcgagc  | aacgctagat  | ggctctatatt | tcctcctgcg  | gctacatagt  |
| 16201 | tacgtatggc  | agtgtcgatc  | gcacatgctg  | ccatatggta  | agtgtcaatt  | tccccataac  |
| 16261 | tcgagccaaa  | cccttgcgat  | tttacaacac  | ctttatttga  | agaaaggatt  | ggccttgaaa  |
| 16321 | caatagcttc  | actgcacact  | cttcccttgc  | cctgcagtgg  | tttcagcact  | gacgaccctt  |
| 16381 | gaacctcatg  | gtcatattgc  | accactatga  | actctttact  | gcatatgttt  | ggctctgctca |
| 16441 | gcattttcttt | tagttcaaca  | tctattgaac  | taagtgggag  | ctcagaagct  | cggctctggtg |
| 16501 | tcattgcaagt | agctatccac  | tctccagctc  | acggctttgt  | ctgtaaatgc  | atctttaggat |
| 16561 | taccgtcatg  | cagaaattca  | gtttcgatgt  | ccattattac  | tttcccttca  | ggacatttaa  |
| 16621 | caacagcttt  | accactctca  | ttgaactctc  | caatcacaca  | aacctccaca  | tcattgttttt |
| 16681 | tcataatttg  | cttaaacata  | ggaagatttt  | cttctggcac  | tgctaagggtc | attctctctt  |
| 16741 | gtgattctga  | tatccatatt  | tcccacgaag  | ccataccatc  | gttttttaagg | agaaccttgc  |
| 16801 | tcaaatcaac  | ttcaaatccg  | tctttttcca  | tttcaccaat  | agacgatgat  | agaccacctg  |
| 16861 | ctccgttatc  | cgttattgca  | ttataaagac  | caagatctct  | tgctttttatg | acggcattgg  |
| 16921 | atagtttttt  | ttgtgttatg  | gggtcaccaa  | tttgcacaat  | tgttgaagggt | ctgtttcccg  |
| 16981 | acaaagcctc  | tgaggaaaac  | gttgcgccgt  | gaattccgtc  | ccttccaact  | cttccaccaa  |
| 17041 | taattacgat  | tttatcgcca  | ttttttggtc  | ctttaatgtg  | tgaagggtgcg | ttattttatgt |
| 17101 | tgcgcggaat  | aattccgaca  | ctgccaacaa  | aaaccagcgg  | cttgccacaa  | aatctatcgt  |
| 17161 | caaaatatac  | cgatccaagt  | tgtgttgtaa  | taccagagca  | attaccagca  | acattaacac  |
| 17221 | catggatcac  | ttttttcatt  | atatattttg  | gcggtaagat  | ctcatcagtg  | cgctctttat  |
| 17281 | ccctataaaa  | tttgcccttt  | gcttcttttg  | caaagcaaaa  | gtaataggta  | ttcattatag  |
| 17341 | gtccgcgcgc  | tttcccgaac  | ccaactacat  | cacgattaac  | tccaagcact  | ccggtcattg  |
| 17401 | ctccaccaaa  | tggtatcaaga | gctgaagggtc | tattgtgggt  | ttcaacttta  | tctacaatca  |
| 17461 | agtaatcgtc  | atcaaaaatt  | attcctcctg  | cgttgtcaga  | gaaaactgac  | acacatatgt  |
| 17521 | cagaatttat  | ctcacgcgtt  | gcacgcttga  | tataatgtgc  | gtataggcca  | tctttttattt |
| 17581 | catcaatggg  | agagcaaaaag | atattgtgct  | tacaatgttc  | agaccaagtc  | tgtgccagag  |
| 17641 | actcaagtcc  | aatatcatat  | ggattttctat | taagtttttt  | aaagtaatcc  | tttatagctt  |
| 17701 | tcattgctgc  | cagagagagc  | cctaaagtgc  | cattaccatc  | gattccatct  | ctgctgattt  |
| 17761 | tctcaagtcc  | ttggtcactt  | acatttaggt  | taacagactt  | agccccatta  | ctacttgata  |
| 17821 | tactccagtg  | gctctctttt  | gtcattcctg  | tttccccctc  | tgtcattcca  | gtgcttgaca  |
| 17881 | ctggaatcca  | gtttttcatta | tacaattgct  | tgaaaattttc | tggaatccaag | tagtcaagca  |
| 17941 | ctgggatgac  | gcctttttaac | ttaccgtaat  | gcctccaata  | gtaattgccg  | ttttctttat  |
| 18001 | aaacaagcgt  | gcaataactca | gtgatagggt  | tgaattcttg  | ctttatatca  | tcttcagttg  |
| 18061 | cttgacttag  | aatcaatttt  | gaacttcttg  | cttttatata  | aacattttca  | tcaatgtagt  |

|       |             |             |             |             |             |             |
|-------|-------------|-------------|-------------|-------------|-------------|-------------|
| 18121 | ccttgtttat  | taaataattct | ctaacaattt  | gtttcgctgt  | gttgccctaca | ttatcggtca  |
| 18181 | tgccaggtaa  | gaagcttatt  | tccaagcccc  | actttgcttg  | tggttctatg  | aaatcatacg  |
| 18241 | gaacttcttc  | aaggttttca  | ttgtaggaat  | aataacggca  | gtcttgatg   | actttattat  |
| 18301 | aaaatagccc  | gcaaatttct  | tcatataatt  | tggatggtaa  | tcctttgcgt  | atgtaaatcg  |
| 18361 | agtaaacggt  | gactaacctt  | ctgcatccaa  | tttgctcgca  | tttattttaa  | acttctattc  |
| 18421 | taatgtttgc  | catgtaattg  | tataaaaaat  | tttaatatat  | aatagcatac  | aagcacgttt  |
| 18481 | atattttgaa  | taatttctat  | acaataaaaat | attgtattaa  | ttgttactgt  | tagtgggaag  |
| 18541 | agttttttacc | gttaatgtgg  | atgaatccct  | ttttgatgtg  | ctggttcagc  | acatatattc  |
| 18601 | tgaatatgaa  | agagaaaaaa  | ttcccagagat | aaagggtcata | cttccttgca  | agagggatgt  |
| 18661 | gatagcgtaa  | ctcaatgcat  | tcaagaatta  | taacgctgaa  | aaatgcataa  | ttttgccaga  |
| 18721 | gatagtttcg  | ctagagaaca  | ttgatgagga  | agattttaata | ttaaatcttg  | atagagttaa  |
| 18781 | agttataagt  | ccaataaaaa  | ggacgctgct  | actcattcaa  | ttcatattgg  | aatggaatag  |
| 18841 | aaaaaataac  | gacaatttcc  | cagttgattt  | agcttatagc  | ctgccatcac  | tgcttgataa  |
| 18901 | aattcaatct  | acccaaacaa  | cggattatga  | tcaattttaat | gagcattcaa  | aaaaaataga  |
| 18961 | gaatttcata  | agcttactca  | ctgagacttg  | gagtaaaact  | ttaaaagggt  | tagaagtagt  |
| 19021 | agatatatta  | aaacataaga  | gtgattacat  | aaacaatatg  | ataatctctt  | tacaaaaaga  |
| 19081 | ccaatatata  | atctttgttg  | gaattggaaa  | ggataagtcg  | ttaattaagg  | ctatatatga  |
| 19141 | cctgccattt  | ggaaaaataa  | ttttgcctaa  | cctgaatttg  | aaaattaaag  | agaaagactg  |
| 19201 | gaaattgctt  | gataaaaaac  | actatcaata  | ttgtctgaaa  | gatctgctcg  | attattttaa  |
| 19261 | tgtagataga  | agggatgtta  | gctgcttgaa  | cactatagag  | aatgaaataa  | ctgactatgt  |
| 19321 | ctttgatata  | actgccgatc  | taagcaaagt  | tagtagtgga  | catgttggca  | atattgaagt  |
| 19381 | catcacttgt  | gattccagag  | aggaagaagc  | acaagtgaca  | tcattaatta  | tagaaaatga  |
| 19441 | aggttatgaa  | aacatttctt  | tggtcgtctt  | tgataaatta  | cttgcagctc  | gtatagcatg  |
| 19501 | tttatcaagg  | caacacagtg  | ccataaccgga | aaattaccct  | tatataacgc  | ttctgcttta  |
| 19561 | tagtatcgaa  | gttttgacct  | caaattggag  | cagtgtgtca  | ttactttcgc  | tccttaaaca  |
| 19621 | taggctagtg  | acttttggtt  | acactcaaga  | agagtacact  | cggattttat  | ctgaatttga  |
| 19681 | aatagaggta  | ttacgcaact  | ttagtacaaa  | tggcctgagc  | gatattataa  | atgctatcaa  |
| 19741 | tgcccataaa  | aagctaaaac  | ataaagaaga  | tatattactt  | attatcagta  | agttagaggt  |
| 19801 | tgtattttaa  | cctttgctta  | acattataaa  | ttgccctatt  | tctgatgtgg  | tggcaactca  |
| 19861 | tttgacagt   | gttaatatgc  | tatctggtat  | aaatttttca  | gagctaaatg  | gtgaaatagg  |
| 19921 | taatttccacc | tgtaatttct  | tgaatgcatg  | tgagggtgta  | gaaattaagt  | gctccttaga  |
| 19981 | gttatataac  | caaattctga  | ccttattttt  | agagaaaagag | tttttctctg  | tagcaaatga  |
| 20041 | cttaaataaa  | ttcagcttat  | atcacacaac  | ggttgtaata  | ctcgctgggt  | ttaatgaagc  |
| 20101 | gccaaagctt  | caaagtccgc  | ttttgaatgc  | acttacgaga  | gaaaaattta  | gtcttccttc  |
| 20161 | tgcgcaagaa  | gagcaggggt  | atttttttta  | tactttacac  | aatttgtttt  | gtgcaagtaa  |
| 20221 | ggtttatatt  | acaagatcgc  | taagccatag  | aaaaccaatt  | ctattgcagc  | gtttggaaat  |
| 20281 | tatgtttacag | gggtcaaaaat | atccttatcg  | tgattggcta  | aggatattaa  | atacgctga   |
| 20341 | atgtactggt  | ccatgtactc  | agcctatgcc  | aaaacctcaa  | accgaagtta  | gaaaagaaaa  |
| 20401 | aatgcaggtg  | atgtcttgca  | gtgcaataga  | aaagctaatt  | cgtaatcctt  | attcatttta  |
| 20461 | cgttgaatat  | atactgggcc  | ttaaacaatt  | aagagacttg  | aattttaagc  | catcgatgtt  |
| 20521 | ggaatttggc  | actatggtgc  | acaacattct  | tgcaagatat  | ttacgcaaca  | aaaagtcgcc  |
| 20581 | aatgagcatt  | gcacgagaaa  | cattctcgac  | tagtcagttt  | aatttttcaa  | atatgtggtg  |
| 20641 | gataagacta  | cagagggtaa  | ttcaatcttt  | tgtcgaactt  | gatgaaactc  | gaagcaacta  |
| 20701 | tgttgagttg  | gaaaagagct  | tttcctgtcc  | gatatttcat  | attccagtgc  | gtgatgctgg  |
| 20761 | ttcttgtgat  | cagtatgaaa  | ctgctgggat  | gacaaatagg  | ccacaagaaa  | tttactgac   |
| 20821 | agcaagatgt  | gatagagttg  | agtatctacc  | aagtgggcaa  | gtggcaatta  | tagactataa  |
| 20881 | gcttgggtaca | ccaccttcca  | atgaagaagt  | aatgtcggga  | ttttttccgc  | aattaatttt  |
| 20941 | acaagcctta  | gcggtagaac  | atataacaaa  | aagagaagtc  | tcagaacttg  | cttattggaa  |
| 21001 | acttgattat  | gataaaaata  | aagttatttc  | tatacaaaat  | tatagatata  | aaatgcaaga  |
| 21061 | attaaaaaat  | gatctgcctg  | gtttttttat  | taattattta  | agtaattcca  | caccctttat  |
| 21121 | tgccctctcca | tatttttgata | aattcctgag  | atttaacagc  | tataaacagc  | tagaaaagggt |
| 21181 | aggagagtgg  | ttgtaaatgg  | tgtcatccga  | gtacctgaca  | ctggtttcca  | tccaaaaggg  |
| 21241 | tgtcatccca  | gtgcttgaca  | ctgggatggc  | tttgttgcat  | cacactttat  | gagatgggtga |
| 21301 | tttatggtaa  | attcatgtaa  | ctatctcaaa  | tttagccata  | ccaatatcag  | tgaatttatt  |
| 21361 | aagcaaatag  | catttgatta  | gcagttcttt  | ttctcgattt  | atctcagatt  | tattcctaaa  |
| 21421 | actaaatccg  | aataatttgct | ttaatcttga  | gaaaaaccct  | tcaatataag  | atcttttccc  |
| 21481 | ataattttact | tcttttttcc  | attctttcat  | gccatcttca  | ccgtataatt  | ttattaacct  |
| 21541 | aatagcagca  | ttcctgttag  | acatataatc  | tattttctgga | tgttctgccg  | cattgtttat  |
| 21601 | tgggtggaatt | tttgtcttta  | tatcatattc  | gttacacaac  | ttataaaaact | tgtgcctatc  |
| 21661 | acatgctcta  | tctgcatata  | gtgcttttat  | ggcatgctga  | aaatcaactt  | cttttagcaa  |

```

21721 atcacaagct ccatagtgat cagccgttac tgtatTTTtac agctatggct tttttgttgt
21781 ttatatTTcaa cattacgtgc aattttctcg tttgtcTata gccacgatat tttctgtcag
21841 tgctatTTTtc cttgtctgtgt gttgttTgat atactaagag gttgtccgga aactagTaaa
21901 ttcaagcata tTccctcttt aacataaccc tactcatagc taggtatatg aaattctcag
21961 tggatgttTgt gagTaaatca tactccttcg atagccttct attcctatta acccaagcaa
22021 aagtcctttc tacaacccat cttcttggct gtactTTTaaa cccttgttct cttgttggtT
22081 gtagctcagg tggcgtatct ttgtgcaccc aaaatctaca tggaggcctt ttaacaattt
22141 caatatctat gTcatattct tcttttatgt gattctTTaa atttcttctt tggtatccca
22201 tgtcagccca cattttttTta acttttagtat attttgttct catattgttt aatgctattt
22261 taataccatc tctatcattt tcgttagcag cgcctacgta acaacctagt ataaaaccct
22321 gagtgtctgt aattatatgc ctttttctac cttttacttt tttacttcca tcatagcctt
22381 tgatcccccc ttttctgtag tctttacaga ttgactatct actatacagg cactcggtg
22441 ctcatctctt cctattttTt tttactata ttttgtaatt tcataattca ttttctcaaa
22501 aattccctgc ttcttccatt gcctgaactg ctcatacaca gtcttccata gcggaaaatc
22561 atttggTaaa taccgccatt gacaccctgt acgcaataca tagaaaattg cttctaatat
22621 ttctctttTg ctatactttg gcggccttcc tcttttcttg tatgatactc tgaagtgttt
22681 ttctattctt gccattccc tttcgcttag atctgttTga tacttttttc tcatctttac
22741 cccgtactaa aatttcagat attatagcct tttacttatt tccggacaac ctctagttac
22801 cttgaaatgg tatgtgaaag aaagcaacag cctgctagca agctattacc ttttttatta
22861 aagcaatccg ttctctccgc cagtaatatg gagtaatgaa ggagcttctc caatctctgg
22921 tatatcatca agtctagcct gaagatcttt aagtTTaacg tctatctcgc ttgtctttgt
22981 gcctatgttt tctatagtTg atgacagtgg ttctactatg ccgcttTtca tcacatcact
23041 tacatcatcg ttatatTTtat taatactttt catcagacca tcataaaaaat ttttaagatt
23101 cttaacgctt accgtgattg tcggtatagc attaatctct ttttcttcca taaccttagt
23161 tatatcaatt ccatccggtg cgcttttagt agtaatcttc tttatttctg gtattgcaaa
23221 atttggTTTta tTaaacgccg gcttcggaag ttgtaatgta ttatttgatt caacttcttc
23281 actatagtac ttcccaaagt aaatgataaa ggtataataa gctatttgag ttataatggc
23341 gtatagtgtg gattTaaagg aaagggcagt atcgatgata gaaaaaggga agtcaaaggt
23401 tgaggTggca gagcttttTg agataggaat agcaactctg taccgctggT taagaaagaa
23461 agccgctggT gaaagcctaa ggccatcgaa aaacggcagc tttattcgaa aaatagacc
23521 aaaaatactc gaagaatatg tTaaaaagaa tccagatcat acgctggcag agatgaaaca
23581 aaatcttTga tttTgaataa attcaattTg gtataggctg aaacagctaa gaattacttt
23641 aaaaaaaaagt tacactatat caagagcgca atcaagaaga taggcagcga tttaccgata
23701 aaatctcaaa aatagaccat tccagcatct tatatataga tgaagcagga gttgataata
23761 ggTtataccg agagtatTga cgtgctccaa taggaaagaa aatttatTga gatattccag
23821 gaagaaaacg agagagaatc agtataatag gcgggtggat tggaaagaga tttattgcac
23881 caatgacttt caaaggTggg tgtgacaaaag aggtattcaa tacatggTta gagaagatgt
23941 tattacctaa attgccacat ggtactacaa tagttatTga caatgccaca ttccataaaa
24001 ctcccaaaac aaaggagTta atagataatg ctagatgccg tttgctctat ctaccaacat
24061 attcaccaga tttgaaccct atagagcatt gttTgaatac catcaaaagc cgcctcagac
24121 ctttaatTga taaatataca gactTacaac ttttggTtTg taataccata atggaaattt
24181 atcattcatt ttagaaaata ctatagaata taattctgta tttttactca taatagttac
24241 ctctataaaa aaactactta tctttataaaa tcaactactat acaaataaca gtgagtcatt
24301 attaatgtct actattgtga agtctgaggc ctgtacgatt tctggcatat cgTccttgat
24361 ttgcttgagc atctcaatca tttccttTgt ctgtttactc tgctcgtcaa gt

```

//

```

LOCUS      JAQZAU010000122                927 bp    dna        linear    ENV 17-MAR-2023
DEFINITION MAG: Wolbachia pipientis isolate wEsol contig_57228, whole genome
            shotgun sequence.
ACCESSION  JAQZAU010000122 JAQZAU010000000
VERSION    JAQZAU010000122.1
DBLINK     BioProject: PRJNA929258
            BioSample: SAMN33142973
KEYWORDS   WGS; ENV; Metagenome Assembled Genome; MAG.
SOURCE     Wolbachia pipientis (insect metagenome)
ORGANISM   Wolbachia pipientis
            Bacteria; Pseudomonadota; Alphaproteobacteria; Rickettsiales;
            Anaplasmataceae; Wolbachieae; Wolbachia.
REFERENCE  1 (bases 1 to 927)
AUTHORS    Fiutek,N., Couger,B.M., Roy,S., de la Torre,J.R. and Connor,E.F.

```

TITLE Genomic assessment of the contribution of the Wolbachia endosymbiont of Eurosta solidaginis to gall-induction  
 JOURNAL International Journal Molecular Sciences  
 REFERENCE 2 (bases 1 to 927)  
 AUTHORS Fiutek,N., Couger,B.M., Roy,S., de la Torre,J.R. and Connor,E.F.  
 TITLE Direct Submission  
 JOURNAL Submitted (10-FEB-2023) Biology, San Francisco State University, 1600 Holloway Ave, San Francisco, CA 94132, USA  
 COMMENT ##Genome-Assembly-Data-START##  
 Assembly Date :: JUN-2019  
 Assembly Method :: FLYE v. 06-2019  
 Genome Representation :: Full  
 Expected Final Version :: Yes  
 Genome Coverage :: 100.0x  
 Sequencing Technology :: Illumina HiSeq; PacBio Sequel  
 ##Genome-Assembly-Data-END##  
 FEATURES Location/Qualifiers  
 source 1..927  
 /organism="Wolbachia pipientis"  
 /mol\_type="genomic DNA"  
 /submitter\_seqid="contig\_57228"  
 /isolate="wEsol"  
 /isolation\_source="galls on Solidago altissima"  
 /host="Eurosta solidaginis MN-2018-EFC"  
 /db\_xref="taxon:955"  
 /environmental\_sample  
 /country="USA: Cowling Arboretum, Carleton College, Northfield, MN"  
 /lat\_lon="44.48 N 93.13 W"  
 /altitude="280 m"  
 /collection\_date="2018-11"  
 /metagenome\_source="insect metagenome"  
 /note="metagenomic"  
 gene 64..444  
 /locus\_tag="wEsol\_01442"  
 CDS 64..444  
 /locus\_tag="wEsol\_01442"  
 /codon\_start=1  
 /transl\_table=11  
 /fullproduct="qcoverage 100 , hcoverage 100 , similarity 100 , identity 100 , evalue 1.16e-87 , alnlength 126 , Bacteria , Proteobacteria , AOV87106.1 transposase [Wolbachia endosymbiont of Drosophila incompta]"  
 /cog="COG3293 COG3293 124 Transposase and inactivated derivatives"  
 /pfam="DUF4096"  
 /product="transposase"  
 /translation="MRKKYPTDLSEREWARIKHFVRSYKKGGRPPKYSKREILEAIFYVLRGTGCQWRYLPNDFPLWKTVYEQFRQWKKQGIFEKMNIEITKYSRRKIGRNEQPSACIVDSQSVKTTEKGGSKAMMEVKK"  
 /besthit="qcoverage 100 , hcoverage 100 , similarity 100 , identity 100 , evalue 1.16e-87 , alnlength 126 , Bacteria , Proteobacteria , AOV87106.1 transposase [Wolbachia endosymbiont of Drosophila incompta]"  
 gene 555..896  
 /locus\_tag="wEsol\_01443"  
 CDS 555..896  
 /locus\_tag="wEsol\_01443"  
 /codon\_start=1  
 /transl\_table=11

```

/fullproduct="qcoverage 100 , hcoverage 100 , similarity
100 , identity 100 , evalue 1.53e-79 , alnlength 113 ,
Bacteria , Proteobacteria , AAS13810.1 transposase, IS5
family, OrfB [Wolbachia endosymbiont of Drosophila
melanogaster]"
/cog="COG3293 COG3293 124 Transposase and inactivated
derivatives"
/pfam="DDE_Tnp_1_2 DDE_Tnp_1"
/product="transposase, IS5 family, OrfB"
/translation="MRTKYTKVKKMWADMGYQGRNLKNHIKEEYDIDIEIVKRPPCRF
WVHKDTPPELLPTREQGFKVQPRRWVVERTFAWVNRNRRLSKEYDLLTTSTENFIYLA
MSRVMLKREYA"
/besthit="qcoverage 100 , hcoverage 100 , similarity 100
, identity 100 , evalue 1.53e-79 , alnlength 113 ,
Bacteria , Proteobacteria , AAS13810.1 transposase, IS5
family, OrfB [Wolbachia endosymbiont of Drosophila
melanogaster]"

```

# ORIGIN

```

1  gttaagaggt  tgtccggaaa  taagtaaaag  gctataatat  ctgaaatddd  agtacggggg
61  aagatgagaa  aaaagtatcc  aacagatcta  agcgaaaggg  aatgggcaag  aatagaaaaa
121  cacttcagag  tatcatacaa  gaaaggagga  aggccgccaa  agtatagcaa  aagagaaaata
181  ttagaagcaa  ttttctatgt  attgcgtaca  ggggtgtcaat  ggcgggtattd  accaaatgat
241  tttccgctat  ggaagactgt  gtatgagcag  ttcaggcaat  ggaagaagca  gggaatddd
301  gagaaaatga  attatgaaat  tacaaaatat  agtagaagaa  aaataggaag  gaatgagcag
361  ccgagtgcct  gtatagtaga  tagtcaatct  gtaaagacta  cagaaaaggg  gggatcaaag
421  gctatgatgg  aagtaaaaaa  gtaaagggtg  gaaaaaggca  tataattaca  gacactcagg
481  gttttatact  aggttggtac  gtaggcgctg  ctaacgaaaa  tgatagagat  ggtattaaaa
541  tagcattaaa  caatatgaga  acaaaatata  ctaaagttaa  aaaaatgtgg  gctgacatgg
601  gataccaagg  aagaaattta  aagaatcaca  taaaggaaga  atatgacata  gatattgaaa
661  ttgttaaaag  gcctccatgt  agatdddggg  tgcacaaaga  tacgccacct  gagctactac
721  caacaagaga  acaagggttd  aaagtacagc  caagaagatg  ggtdgtagaa  aggacttdtg
781  cttgggttaa  taggaataga  aggctatcga  aggagtatga  tttactcaca  acatccactg
841  agaattdcat  atacctagct  atgagtaggg  ttatgttaaa  gagggaatat  gcttgaattd
901  actagtdtdc  ggacaacctc  taagacg

```

//

```

LOCUS      JAQZAU010000123      6217 bp      dna      linear      ENV 17-MAR-2023
DEFINITION MAG: Wolbachia pipientis isolate wEsol contig_57438, whole genome
            shotgun sequence.
ACCESSION  JAQZAU010000123  JAQZAU010000000
VERSION    JAQZAU010000123.1
DBLINK     BioProject: PRJNA929258
            BioSample: SAMN33142973
KEYWORDS   WGS; ENV; Metagenome Assembled Genome; MAG.
SOURCE     Wolbachia pipientis (insect metagenome)
ORGANISM   Wolbachia pipientis
            Bacteria; Pseudomonadota; Alphaproteobacteria; Rickettsiales;
            Anaplasmataceae; Wolbachieae; Wolbachia.
REFERENCE  1  (bases 1 to 6217)
AUTHORS    Fiutek,N., Couger,B.M., Roy,S., de la Torre,J.R. and Connor,E.F.
TITLE      Genomic assessment of the contribution of the Wolbachia
            endosymbiont of Eurosta solidaginis to gall-induction
JOURNAL     International Journal Molecular Sciences
REFERENCE  2  (bases 1 to 6217)
AUTHORS    Fiutek,N., Couger,B.M., Roy,S., de la Torre,J.R. and Connor,E.F.
TITLE      Direct Submission
JOURNAL     Submitted (10-FEB-2023) Biology, San Francisco State University,
            1600 Holloway Ave, San Francisco, CA 94132, USA
COMMENT    ##Genome-Assembly-Data-START##
            Assembly Date      :: JUN-2019
            Assembly Method     :: FLYE v. 06-2019

```

Genome Representation :: Full  
Expected Final Version :: Yes  
Genome Coverage :: 100.0x  
Sequencing Technology :: Illumina HiSeq; PacBio Sequel  
##Genome-Assembly-Data-END##

FEATURES

|        |                                                                                                                                                                                                                                           |
|--------|-------------------------------------------------------------------------------------------------------------------------------------------------------------------------------------------------------------------------------------------|
| source | Location/Qualifiers                                                                                                                                                                                                                       |
|        | 1..6217                                                                                                                                                                                                                                   |
|        | /organism="Wolbachia pipientis"                                                                                                                                                                                                           |
|        | /mol_type="genomic DNA"                                                                                                                                                                                                                   |
|        | /submitter_seqid="contig_57438"                                                                                                                                                                                                           |
|        | /isolate="wEsol"                                                                                                                                                                                                                          |
|        | /isolation_source="galls on Solidago altissima"                                                                                                                                                                                           |
|        | /host="Eurosta solidaginis MN-2018-EFC"                                                                                                                                                                                                   |
|        | /db_xref="taxon:955"                                                                                                                                                                                                                      |
|        | /environmental_sample                                                                                                                                                                                                                     |
|        | /country="USA: Cowling Arboretum, Carleton College, Northfield, MN"                                                                                                                                                                       |
|        | /lat_lon="44.48 N 93.13 W"                                                                                                                                                                                                                |
|        | /altitude="280 m"                                                                                                                                                                                                                         |
|        | /collection_date="2018-11"                                                                                                                                                                                                                |
|        | /metagenome_source="insect metagenome"                                                                                                                                                                                                    |
|        | /note="metagenomic"                                                                                                                                                                                                                       |
| gene   | complement(24..365)                                                                                                                                                                                                                       |
|        | /locus_tag="wEsol_01444"                                                                                                                                                                                                                  |
| CDS    | complement(24..365)                                                                                                                                                                                                                       |
|        | /locus_tag="wEsol_01444"                                                                                                                                                                                                                  |
|        | /codon_start=1                                                                                                                                                                                                                            |
|        | /transl_table=11                                                                                                                                                                                                                          |
|        | /fullproduct="qcoverage 100 , hcoverage 100 , similarity 100 , identity 100 , evalue 1.53e-79 , alnlength 113 , Bacteria , Proteobacteria , AAS13810.1 transposase, IS5 family, OrfB [Wolbachia endosymbiont of Drosophila melanogaster]" |
|        | /cog="COG3293 COG3293 124 Transposase and inactivated derivatives"                                                                                                                                                                        |
|        | /pfam="DDE_Tnp_1_2 DDE_Tnp_1"                                                                                                                                                                                                             |
|        | /product="transposase, IS5 family, OrfB"                                                                                                                                                                                                  |
|        | /translation="MRTKYTKVKKMWADMGYQGRNLKNHIKEEYDIDIEIVKRPPCRF WVHKDTPPELLPTREQGFKVQPRRWVVERTFAWVNRNRRLSKEYDLLTTSTENFIYLA MSRVMLKREYA"                                                                                                        |
|        | /besthit="qcoverage 100 , hcoverage 100 , similarity 100 , identity 100 , evalue 1.53e-79 , alnlength 113 , Bacteria , Proteobacteria , AAS13810.1 transposase, IS5 family, OrfB [Wolbachia endosymbiont of Drosophila melanogaster]"     |
| gene   | complement(476..856)                                                                                                                                                                                                                      |
|        | /locus_tag="wEsol_01445"                                                                                                                                                                                                                  |
| CDS    | complement(476..856)                                                                                                                                                                                                                      |
|        | /locus_tag="wEsol_01445"                                                                                                                                                                                                                  |
|        | /codon_start=1                                                                                                                                                                                                                            |
|        | /transl_table=11                                                                                                                                                                                                                          |
|        | /fullproduct="qcoverage 100 , hcoverage 100 , similarity 100 , identity 100 , evalue 1.16e-87 , alnlength 126 , Bacteria , Proteobacteria , AOV87106.1 transposase [Wolbachia endosymbiont of Drosophila incompta]"                       |
|        | /cog="COG3293 COG3293 124 Transposase and inactivated derivatives"                                                                                                                                                                        |
|        | /pfam="DUF4096"                                                                                                                                                                                                                           |
|        | /product="transposase"                                                                                                                                                                                                                    |
|        | /translation="MRKKYPTDLSEREWARIKHFVRSYKKGGRPPKYSKREILEAIF                                                                                                                                                                                 |

```

YVLRTGCQWRYLPNDFPLWKTVYEQFRQWKKQGIFEKMNYEITKYSRRKIGRNEQPSA
CIVDSQSVKTTEKGGSKAMMEVKK"
/blasthit="qcoverage 100 , hcoverage 100 , similarity 100
, identity 100 , evalue 1.16e-87 , alnlength 126 ,
Bacteria , Proteobacteria , AOV87106.1 transposase
[Wolbachia endosymbiont of Drosophila incompta]"
gene 1016..1111
/locus_tag="wEsol_01446"
CDS 1016..1111
/locus_tag="wEsol_01446"
/codon_start=1
/transl_table=11
/fullproduct="qcoverage 100 , hcoverage 110.714285714286
, similarity 90.3 , identity 90.3 , evalue 9.12e-07 ,
alnlength 31 , Bacteria , Proteobacteria , ERN56059.1
hypothetical protein WMELPOP_01304 [Wolbachia pipientis
wMelPop]"
/translation="MPAAYSIDLRRKAMEAMEALDEGESRATVAK"
/product="hypothetical protein"
/blasthit="qcoverage 100 , hcoverage 110.714285714286 ,
similarity 90.3 , identity 90.3 , evalue 9.12e-07 ,
alnlength 31 , Bacteria , Proteobacteria , ERN56059.1
hypothetical protein WMELPOP_01304 [Wolbachia pipientis
wMelPop]"
gene 1182..1364
/locus_tag="wEsol_01447"
CDS 1182..1364
/locus_tag="wEsol_01447"
/codon_start=1
/transl_table=11
/product="hypothetical protein"
/pfam="HTH_Tnp_1 HTH_23 HTH_28"
/translation="MAREYTAEFKLEAVKLTNEQRKVGQPVAKVARDLGIRDSVLGKW
MKKYNEKSQRQMHFQM"
/cog="COG2963 COG2963 116 Transposase and inactivated
derivatives"
/blasthit="qcoverage 85 , hcoverage 70.83333333333333 ,
similarity 100 , identity 100 , evalue 8.30e-26 ,
alnlength 51 , Bacteria , Proteobacteria , WP_094189595.1
transposase, partial [Wolbachia endosymbiont of
Drosophila ananassae]"
gene 1897..2061
/locus_tag="wEsol_01448"
CDS 1897..2061
/locus_tag="wEsol_01448"
/codon_start=1
/transl_table=11
/fullproduct="qcoverage 100 , hcoverage 100 , similarity
100 , identity 100 , evalue 4.17e-28 , alnlength 54 ,
Bacteria , Proteobacteria , WP_156768661.1 MULTISPECIES:
hypothetical protein [Wolbachia]"
/cog="Tra5 COG2801 232 Transposase and inactivated
derivatives"
/pfam="rve"
/product="hypothetical protein"
/translation="MSSSINKQLVMDSLLMAVNKRKPAKNLLHSDQGSQYTSQGYQY
LLSIKNIDES"
/blasthit="qcoverage 100 , hcoverage 100 , similarity 100
, identity 100 , evalue 4.17e-28 , alnlength 54 ,
Bacteria , Proteobacteria , WP_156768661.1 MULTISPECIES:

```

```

gene      hypothetical protein [Wolbachia]"
          2051..2215
          /locus_tag="wEsol_01449"
CDS       2051..2215
          /locus_tag="wEsol_01449"
          /codon_start=1
          /transl_table=11
          /fullproduct="qcoverage 100 , hcoverage 100 , similarity
          100 , identity 100 , evalue 5.23e-31 , alnlength 54 ,
          Bacteria , Proteobacteria , WP_080717614.1 MULTISPECIES:
          IS3 family transposase [Wolbachia]"
          /cog="Tra5 COG2801 232 Transposase and inactivated
          derivatives"
          /pfam="rve_3 rve rve_2"
          /product="IS3 family
          transposase"
          /translation="MSHKGCCYDNSVVESFFSSLKREILIDTSQHSAQQTRTAIFEYI
          EIFYNKQRHY"
          /besthit="qcoverage 100 , hcoverage 100 , similarity 100
          , identity 100 , evalue 5.23e-31 , alnlength 54 ,
          Bacteria , Proteobacteria , WP_080717614.1 MULTISPECIES:
          IS3 family transposase [Wolbachia]"
gene      2598..2945
          /locus_tag="wEsol_01450"
CDS       2598..2945
          /locus_tag="wEsol_01450"
          /codon_start=1
          /transl_table=11
          /fullproduct="qcoverage 100 , hcoverage 100 , similarity
          100 , identity 100 , evalue 2.74e-74 , alnlength 115 ,
          Bacteria;Eukaryota , Proteobacteria;Arthropoda ,
          WP_155968342.1 MULTISPECIES: IS630 transposase-related
          protein [Wolbachia]"
          /cog="COG3415 COG3415 138 Transposase and inactivated
          derivatives"
          /pfam="HTH_Tnp_IS630 HTH_Tnp_1 HTH_23 HTH_28 HTH_29 HTH_7
          CENP-B_N Pfam-B_14738 HTH_8 HTH_17 HTH_24 Pfam-B_2106"
          /product="IS630
          transposase-related protein"
          /translation="MAYSVDLRERAVSMIEKGKSKVEVAELLEIGIATLYRWLRKKAA
          GESLRPSKNGSFIRKIDPKILEEYVKKNPDHTLAEMKQNLGFGINSIWYRLKQLRITL
          KKSYSISRQSR"
          /besthit="qcoverage 100 , hcoverage 100 , similarity 100
          , identity 100 , evalue 2.74e-74 , alnlength 115 ,
          Bacteria;Eukaryota , Proteobacteria;Arthropoda ,
          WP_155968342.1 MULTISPECIES: IS630 transposase-related
          protein [Wolbachia]"
gene      3145..3456
          /locus_tag="wEsol_01451"
CDS       3145..3456
          /locus_tag="wEsol_01451"
          /codon_start=1
          /transl_table=11
          /fullproduct="qcoverage 100 , hcoverage 100 , similarity
          100 , identity 100 , evalue 1.60e-74 , alnlength 103 ,
          Bacteria , Proteobacteria , WP_155968470.1 transposase
          [Wolbachia pipientis]"
          /cog="COG3335 COG3335 132 Transposase and inactivated
          derivatives"
          /pfam="DDE_3 DDE_1"

```

```

        /product="transposase"
        /translation="MTFKGGCDKEVFNTWLEKMLLPKLPHGTTIVMDNATFHKTPKTK
        ELIDNARCRLLYLPTYSPDLNPIEHCWNTIKSRLRPLMHKYTDLQLLVGNTIMEIYHS
        F"
        /besthit="qcoverage 100 , hcoverage 100 , similarity 100
        , identity 100 , evalue 1.60e-74 , alnlength 103 ,
        Bacteria , Proteobacteria , WP_155968470.1 transposase
        [Wolbachia pipientis]"
gene      3564..4205
        /locus_tag="wEsol_01452"
CDS       3564..4205
        /locus_tag="wEsol_01452"
        /codon_start=1
        /transl_table=11
        /product="hypothetical protein"
        /pfam="DUF4096 DDE_Tnp_1 DDE_Tnp_1_3"
        /translation="MGKNRKHFVRSYKKGGRPPKYSKREILEAIFYVLRTGCQWRYLP
        NDFPLWKTVYEQFRQWKQGNFEKMNYEITKYSRRKIGRNEQPSACIVDSQSVKDYRK
        GGIKGYDGSKKVKGRKRHIITDTQGFILGCYVGAANENDRDGIKIALNNMRTKYTKVK
        KMWADMGYQGRNLKNIKEEYDIDIEIVKRPPCRFWVHKDTPPELLPTMRTRV"
        /besthit="qcoverage 95.3051643192488 , hcoverage
        76.6037735849057 , similarity 95.1 , identity 95.1 ,
        evalue 2.03e-140 , alnlength 203 , Bacteria ,
        Proteobacteria , WP_094745770.1 IS5 family transposase
        [Wolbachia sp. wRi]"
gene      4960..5304
        /locus_tag="wEsol_01453"
CDS       4960..5304
        /locus_tag="wEsol_01453"
        /codon_start=1
        /transl_table=11
        /fullproduct="qcoverage 87.719298245614 , hcoverage
        97.0873786407767 , similarity 82.0 , identity 81.0 ,
        evalue 1.16e-52 , alnlength 100 , Bacteria ,
        Proteobacteria , CDR78814.1 IS5 family transposase
        OrfB,Transposase DDE domain [Wolbachia endosymbiont of
        Drosophila simulans wAu]"
        /cog="COG3293 COG3293 124 Transposase and inactivated
        derivatives"
        /pfam="DDE_Tnp_1_2"
        /product="IS5 family transposase
        OrfB,Transposase DDE domain"
        /translation="MWADMGYQGRNLKNIKEEYDIDIEIVKRPPCRFWVHKDTHLSY
        YQQRTSGLKYSQEDGLVERTFAWVNRNRRLSKEYDLLTTSTENFIYLA MSRVMFKEGI
        CLNLLVVRTNSK"
        /besthit="qcoverage 87.719298245614 , hcoverage
        97.0873786407767 , similarity 82.0 , identity 81.0 ,
        evalue 1.16e-52 , alnlength 100 , Bacteria ,
        Proteobacteria , CDR78814.1 IS5 family transposase
        OrfB,Transposase DDE domain [Wolbachia endosymbiont of
        Drosophila simulans wAu]"
gene      5361..5606
        /locus_tag="wEsol_01454"
CDS       5361..5606
        /locus_tag="wEsol_01454"
        /codon_start=1
        /transl_table=11
        /pfam="DUF4096"
        /fullproduct="qcoverage 100 , hcoverage 100 , similarity
        80.2 , identity 76.5 , evalue 6.27e-35 , alnlength 81 ,

```

Bacteria , Proteobacteria , EAL57767.1 transposase, IS5 family, OrfA [Wolbachia endosymbiont of Drosophila ananassae]"  
 /translation="MRKKYPTDLSEREWARIEKHFRVSYKKGGRRPPKYSKREILEAIF  
 YVLRGTGCQWRYLQIMIFRYGRLCMSSSGNGRSREFLRK"  
 /product="transposase, IS5 family, OrfA"  
 /besthit="qcoverage 100 , hcoverage 100 , similarity 80.2  
 , identity 76.5 , evalue 6.27e-35 , alnlength 81 ,  
 Bacteria , Proteobacteria , EAL57767.1 transposase, IS5 family, OrfA [Wolbachia endosymbiont of Drosophila ananassae]"

gene

CDS

5981..>6217  
 /locus\_tag="wEsol\_01455"  
 5981..>6217  
 /locus\_tag="wEsol\_01455"  
 /codon\_start=1  
 /transl\_table=11  
 /pfam="DDE\_Tnp\_1\_2 DDE\_Tnp\_1"  
 /fullproduct="qcoverage 82.2784810126582 , hcoverage  
 83.3333333333333 , similarity 95.4 , identity 92.3 ,  
 evalue 1.58e-36 , alnlength 65 , Bacteria ,  
 Proteobacteria , WP\_213863617.1 transposase, partial  
 [Wolbachia endosymbiont of Ceratitis capitata]"  
 /translation="MHKDTPELLPTREQGFKVQPRRWVVERTFAWVNRNRRLSKEYD  
 LLTTSTENFIYLA MSRCYVKEGICLNLLVSGQPLV"  
 /product="transposase, partial"  
 /besthit="qcoverage 82.2784810126582 , hcoverage  
 83.3333333333333 , similarity 95.4 , identity 92.3 ,  
 evalue 1.58e-36 , alnlength 65 , Bacteria ,  
 Proteobacteria , WP\_213863617.1 transposase, partial  
 [Wolbachia endosymbiont of Ceratitis capitata]"

ORIGIN

```

1 aggttggtccg gaaactagta aattcaagca tattccctct ttaacataac cctactcata
61 gctaggtata tgaaattctc agtggatgtt gtgagtaa atcatactcctt cgatagcctt
121 ctattcctat taacccaagc aaaagtcctt tctacaaccc atcttcttgg ctgtacttta
181 aacccttggt ctcttggttg tagtagctca ggtggcgtat ctttgtgcac ccaaaatcta
241 catggaggcc ttttaacaat ttcaatatct atgtcatatt cttcctttat gtgattcttt
301 aaatttcttc cttggtatcc catgtcagcc cacatttttt taacttttagt atattttggt
361 ctcatattgt ttaatgctat ttaataacca tctctatcat tttcgtttagc agcgcctacg
421 taacaaccta gtataaaacc ctgagtgtct gtaattatat gcctttttct accctttact
481 tttttacttc catcatagcc tttgatcccc ctttttctgt agtctttaca gattgactat
541 ctactataca ggcactcggc tgctcattcc ttcctatttt tcttctacta tattttgtaa
601 tttcataatt cattttctca aaaattccct gcttcttcca ttgcctgaac tgctcataca
661 cagtcttcca tagcggaaaa tcatttggtg aataaccgcca ttgacaccct gtacgcaata
721 catagaaaat tgcttcta atttctcttt tgctatactt tggcggcctt cctcctttct
781 tgtatgatac tctgaagtgt ttttctatcc ttgcccattc ctttctgctt agatctgttg
841 gatacttttt tctcatcttt acccgtact aaaatttcag atattatagc cttttactta
901 tttccggaca acctctaagg ccgaatccca gattttgctt ccctcccata gagttatagc
961 ttttctcata ataattccaa taaggtaaga atggatttat ggtagagggg tttgtatgcc
1021 agcagcgtat agttacgact taaggaaaaa agcaatggaa gcaatggaag cattggatga
1081 aggagaaagt agagcaactg ttgccaagtg acctaccca gaaaaagtgg agagaaagaa
1141 aggagttttt ttgggtaaaa taaaattttg gaggattaga aatggcaaga gaatatacgg
1201 cagaattcaa attggaagct gttaagctga caaatgaaca aagaaaggta ggtcaaccag
1261 ttgcaaaagt agcaagagat ctaggaataa gggatagtgt attaggaaaa tggatgaaga
1321 aatataacga aaaaagtcag cggcaaatgc atttccagat gtagcacctt atgacaaaga
1381 gagatttgat ttacaaagca aaagtaacaa gagaaagaga catttttaaa aaagccctgg
1441 ccagtcaaaa agagtaaaat atttttttat atagtaactg ctataaagta caggaattat
1501 gtaggatttt ctgctagtgg ctactataag tggaccacaa gaaaaataag cagtagagaa
1561 tcagcaaata aagagctact cgcagctatt caaaaaatat atcaagtttc taaatgtaga
1621 tatggagctc ctaaaattca tgctgaattg aaggcttttg gtaaaagttg caacttaaaa

```

|      |             |             |             |             |             |             |             |
|------|-------------|-------------|-------------|-------------|-------------|-------------|-------------|
| 1681 | acagtgc     | aa          | gtattatgca  | gaaaaatggt  | attcaggcta  | tattgagaag  | aaaattttaa  |
| 1741 | attaagaaac  | aacaaacgga  | cagtagctcc  | caatatatta  | gacccaaact  | ttattgtcga  |             |
| 1801 | tcaaccaa    | aat         | aaagtatggg  | attacttata  | taaaaaccaa  | agaaggatgg  | ctataatttgg |
| 1861 | caacaataat  | cgatctatat  | tcacgcatgg  | tagttaatga  | gcagttcaat  | aaataaacia  |             |
| 1921 | ttgggttatgg | actctttatt  | aatggccgtt  | aacaagcgta  | aacctgccaa  | aaatctacta  |             |
| 1981 | ttacatagtg  | atcaaggttc  | acaatatact  | tcgcaaggtt  | atcaatatct  | cttatccata  |             |
| 2041 | aaaaacatag  | atgagtcata  | aaggttggtg  | ttacgacaat  | tctgttggtg  | aaagcttctt  |             |
| 2101 | tagctcattg  | aaaagagaaa  | tactttattga | tacttcacaa  | cactctgctc  | aacaaactag  |             |
| 2161 | aactgcaata  | tttgaataca  | tagaaatfff  | ttataacaaa  | caacgtcact  | attaactatt  |             |
| 2221 | gcattcctga  | gcattttgat  | tcattcattct | ctttgtgaaa  | aacattccaa  | actttctctc  |             |
| 2281 | cactttttct  | gggtaagggtc | agttttccatt | tgggttcaa   | tcggatacaa  | tttctccaga  |             |
| 2341 | gctgggta    | aat         | ctcataccag  | aaccatctgc  | tgcaataagt  | ctatagcctc  | tccaactcag  |
| 2401 | gttcattcctg | ataggctgtt  | tggatgctta  | aattcttgaa  | agcctgtatg  | gcaaactcta  |             |
| 2461 | taccttgctt  | tagaaaaagc  | ttgctttgag  | ggtacatgtc  | aatgggtcca  | taagttcaca  |             |
| 2521 | ttctattccc  | aaactttttt  | taactatagt  | acttcccaa   | gtaaatagata | aagggtataat |             |
| 2581 | aagctatttg  | agttataatg  | gcgtatagtg  | tggattttaag | ggaaagggca  | gtatcgatga  |             |
| 2641 | tagaaaaagg  | gaagtcaaag  | gttgaggtgg  | cagagctttt  | ggagatagga  | atagcaactc  |             |
| 2701 | tgtaccgctg  | gttaagaaag  | aaagccgctg  | gtgaaagcct  | aaggccatcg  | aaaaacggca  |             |
| 2761 | gctttattcg  | aaaaatagac  | ccaaaaat    | ac          | tcgaagaata  | tgttaaaaaag | aatccagatc  |
| 2821 | atacgctggc  | agagatgaaa  | caaaatcttg  | gatttggaat  | aaattcaatt  | tggatataggc |             |
| 2881 | tgaacagct   | aagaattact  | ttaaaaaaa   | gttacactat  | atcaagagcg  | caatcaagaa  |             |
| 2941 | gataggcagc  | gatttaccga  | taaaatctca  | aaaatagacc  | attccagcat  | cttatatata  |             |
| 3001 | gatgaagcag  | gagttgataa  | taggttatac  | cgagagtatg  | gacgtgctcc  | aataggaaag  |             |
| 3061 | aaaatttatg  | cagatattcc  | aggaagaaaa  | cgagagagaa  | tcagtataat  | aggcgggtgg  |             |
| 3121 | attggaaaga  | gatttattgc  | accaatgact  | ttcaaaggtg  | ggtgtgacaa  | agaggtattc  |             |
| 3181 | aatacatggg  | tagagaagat  | gttattacct  | aaattgccac  | atggtactac  | aatagttagt  |             |
| 3241 | gacaatgcca  | cattccataa  | aactcccaa   | acaaaggagt  | taatagataa  | tgctagatgc  |             |
| 3301 | cgtttgctct  | atctaccaac  | atattcacca  | gatttgaacc  | ctatagagca  | ttgttggaat  |             |
| 3361 | accatcaaaa  | gccgcctcag  | acctttaatg  | cataaatata  | cagacttaca  | acttttggtt  |             |
| 3421 | ggtaatacca  | taatggaaat  | ttatcattca  | ttttagaaaa  | tactataaga  | gttgtccgga  |             |
| 3481 | aatagtaaaa  | ggctataata  | tctgaaatff  | tagtacgggg  | taaagatgag  | caaaaagtat  |             |
| 3541 | ccaacagatc  | taagcgaaag  | ggaatgggca  | agaatagaaa  | acacttcaga  | gtatcataca  |             |
| 3601 | agaaaggagg  | aaggccgcca  | aagtatagca  | aaagagaaat  | attagaagca  | atftttctatg |             |
| 3661 | tattgcgtac  | aggggtgtcaa | tggcggtatt  | taccaa      | aatga       | ttttccgcta  | tggaaagactg |
| 3721 | tgtatgagca  | gttcaggcaa  | tggagaagac  | aggggaatff  | tgagaaaaatg | aattatgaaa  |             |
| 3781 | ttacaaaaata | tagtagaaga  | aaaataggaa  | ggaatgagca  | gccgagtggc  | tgtatagtag  |             |
| 3841 | atagtcaatc  | tgttaaagac  | tacagaaaaag | gggggatcaa  | aggctatgat  | ggaagtaaaa  |             |
| 3901 | aagtaaaagg  | tagaaaaagg  | catataatta  | cagacactca  | gggttttata  | ctaggttggtt |             |
| 3961 | acgtaggcgc  | tgctaacgaa  | aatgatagag  | atggtattaa  | aatagcatta  | aacaatatga  |             |
| 4021 | gaacaaaata  | tactaaagtt  | aaaaaaatgt  | gggctgacat  | gggataccaa  | ggaagaaatt  |             |
| 4081 | taaagaatca  | cataaaggaa  | gaatatgaca  | tagatattga  | aattgttaaa  | aggcctccat  |             |
| 4141 | gtagatftttg | ggtgcacaaa  | gatacgccac  | ctgagctact  | accaacaatg  | agaacaaggg  |             |
| 4201 | tttaaagtac  | agccaagaag  | atgggttgta  | gaaaggactt  | ttgcttggtt  | taataggaat  |             |
| 4261 | agaaggctat  | cgaaggagta  | tgatttactc  | acaacatcca  | ctgagaatff  | catataccta  |             |
| 4321 | gctatgagta  | ggttatgtta  | aagagggata  | tgcttgaatt  | tactagtttc  | cggacaacct  |             |
| 4381 | ctaagagggt  | gtcggaaata  | gtaaaaggct  | ataatatctg  | aaatftttagt | acggggtaaa  |             |
| 4441 | gatgagaaaa  | aagtatccaa  | cagatctaag  | cgaaagggaa  | tgggcaagaa  | tagaaaaaca  |             |
| 4501 | cttcagagta  | tcatacaaga  | aaggagaaag  | ggccgccaaa  | gtatagcaaa  | agagaaatat  |             |
| 4561 | tagaagcaat  | tttctatgta  | ttgcgtacag  | ggtgtcaatg  | gcggtattta  | ccaaatgatt  |             |
| 4621 | ttccgctatg  | gaagactgtg  | tatgagcagt  | tcaggcaatg  | gaagaagcag  | ggaatftttg  |             |
| 4681 | agaaaatgaa  | ttagaaatta  | caaaatatag  | tagaagaaaa  | taggaaggaa  | tgagcagccg  |             |
| 4741 | agtgcctgta  | tagtagatag  | tcaatctgta  | aagactacag  | aaaagggggg  | atcaaaggct  |             |
| 4801 | atgatggaag  | taaaaaagta  | aagggtagaa  | aaaggcatat  | aattacagac  | actcagggtt  |             |
| 4861 | ttatactagg  | ttgttacgta  | ggcgtctgta  | acgaaaaatga | tagagatggt  | attaaaaatag |             |
| 4921 | cattaaacat  | atgagaacaa  | aatatactaa  | agftaaaaaaa | tgtgggctga  | catgggatac  |             |
| 4981 | caaggaagaa  | atttaaagaa  | tcacataaaag | gaagaatatg  | acatagatat  | tgaaattgftt |             |
| 5041 | aaaaggcctc  | catgtagatt  | ttgggtgcac  | aaagatacgc  | acctgagcta  | ctaccaacag  |             |
| 5101 | agaacaagcg  | gtfttaaagta | cagccaagaa  | gatgggttg   | tagaaaggac  | ttttgcttgg  |             |
| 5161 | gttaatcgga  | atagaaggct  | atcgaaggag  | tatgatttac  | tcacaacatc  | cactgagaat  |             |
| 5221 | ttcatatacc  | tagctatgag  | taggggttatg | tttaaagagg  | gaatatgctt  | gaatttacta  |             |



```

/altitude="280 m"
/collection_date="2018-11"
/metagenome_source="insect metagenome"
/note="metagenomic"
gene <1..289
/locus_tag="wEsol_01456"
CDS <1..289
/locus_tag="wEsol_01456"
/codon_start=1
/transl_table=11
/product="hypothetical protein"
/pfam="PAZ_siRNAbind PAZ_siRNAbind"
/translation="DSIAVEKVLRVAKENGILRDILDTTITIKHLDSREVTYTPLAHA
MFWEDGKIIKEILVAAEENSILKDILDATTTIKYLDGQEETLHTAYLRHIM"
/besthit="qcoverage 44.2105263157895 , hcoverage
16.7330677290837 , similarity 90.5 , identity 73.8 ,
evaluate 2.49e-08 , alnlength 42 , Bacteria ,
Proteobacteria , TLW88495.1 hypothetical protein
FFT11_00395, partial [Wolbachia endosymbiont of
Drosophila yakuba]"
gene 602..1573
/locus_tag="wEsol_01457"
CDS 602..1573
/locus_tag="wEsol_01457"
/codon_start=1
/transl_table=11
/product="hypothetical protein"
/pfam="PAZ_siRNAbind PAZ_siRNAbind PAZ_siRNAbind
Pfam-B_3647 PAZ_siRNAbind PAZ_siRNAbind"
/translation="MLRVAKENDILKDILDATTTIKHSDSREVTYTLLAYAILRENSI
AIEEILKISKENSILKDILNATITIKCPDGRRTVTPLAYAILRKDSMAVEKMLRVAK
ENGILKDILDATTTIKYPDQGEETCTPLAYAILRKDSIAVEKMLRVAKENGILKDILN
TTITIKHKNNQKVTDKLLAALHDKV IQEILDIARENDILKDILNATITIKYPDSEEK
IYTPLTYTISCKSNEAFNTTRAINQDGQEKTHIPFPTVSVLDERETELKLKEKRQSRR
DEGLNFNNGSSDKNVEIKVNGDILLQHSSGTKNEINH TAVRNDVGGG"
/besthit="qcoverage 46.749226006192 , hcoverage
63.1799163179916 , similarity 93.4 , identity 93.4 ,
evaluate 3.29e-75 , alnlength 151 , Bacteria ,
Proteobacteria , EAL59875.1 conserved hypothetical
protein, partial [Wolbachia endosymbiont of Drosophila
simulans]"
gene 1633..1758
/locus_tag="wEsol_01458"
CDS 1633..1758
/locus_tag="wEsol_01458"
/codon_start=1
/transl_table=11
/product="hypothetical protein"
/translation="MTVASMVIELVDSKATCVLLKPTTKLEEVAITYFQGLTLYL"
/besthit="qcoverage 100 , hcoverage 6.25 , similarity 100
, identity 97.6 , evaluate 4.46e-14 , alnlength 41 ,
Bacteria , Proteobacteria , WP_182366402.1 hypothetical
protein [Wolbachia pipientis]"
gene complement(2394..3665)
/locus_tag="wEsol_01459"
CDS complement(2394..3665)
/locus_tag="wEsol_01459"
/codon_start=1
/transl_table=11
/fullproduct="qcoverage 100 , hcoverage 100 , similarity

```

```

100 , identity 99.8 , evalue 1.66e-303 , alnlength 423 ,
Bacteria , Proteobacteria , WP_015588772.1 MULTISPECIES:
phosphoribosylamine--glycine ligase [unclassified
Wolbachia]"
/cog="PurD COG0151 428 Phosphoribosylamine-glycine
ligase"
/pfam="GARS_N GARS_A ATP-grasp_4 RimK Dala_Dala_lig_C
CPSase_L_D2 ATP-grasp ATP-grasp_3 GARS_C"
/tigr="TIGR00877 purD 425 phosphoribosylamine--glycine
ligase"
/product="
phosphoribosylamine--glycine ligase"
/translation="MKVLVIGSGGREHALLWALKKSPILTELYVTPGRQAMKDLGALV
DVNIQNSVDVTQFCKRENIELVVIGPEQPIIDGLADDLVAEGINVFAPSQATAKLEGS
KSFTKGLCKRYGIPTAKYECFVDEGLAKDFVRSNKIKFPLVVKANGIAAGKGVVICNT
ESEAFSAINSMLVEKKFGESGEEIIIEEFLVGEVVSFFALIDGLKVVTLGCAKDYKRV
DESNESQNTGGMGSYSSPSIISKDMEQKIIQKIIYPTAQALVNMGTSYKGVLFAGLII
CKDSPKLLEYNVRFQDPETQSILPRFDSNCDLLKLMLSVAEGKLVNKMVELNNKSTVC
VVVASKGYPGDYQKGEVIKGLDKIESIPGVLVVFHAGTKFDESGNLVSDGGRVLNIVAE
GSTIEEAKSKLYSALNFLEWPGGFFRYDIGS"
/besthit="qcoverage 100 , hcoverage 100 , similarity 100
, identity 99.8 , evalue 1.66e-303 , alnlength 423 ,
Bacteria , Proteobacteria , WP_015588772.1 MULTISPECIES:
phosphoribosylamine--glycine ligase [unclassified
Wolbachia]"
gene complement(3700..4998)
/locus_tag="wEsol_01460"
CDS complement(3700..4998)
/locus_tag="wEsol_01460"
/codon_start=1
/transl_table=11
/fullproduct="qcoverage 100 , hcoverage 100 , similarity
99.3 , identity 99.1 , evalue 3.15e-292 , alnlength 432 ,
Bacteria , Proteobacteria , CDR78425.1 seryl-tRNA
synthetase,Serine--tRNA ligase,seryl-tRNA
synthetase,Prolyl-tRNA synthetase,serine--tRNA
ligase,tRNA synthetase class II core domain (G, H, P, S
and T) [Wolbachia endosymbiont of Drosophila simulans
wAu]"
/cog="SerS COG0172 429 Seryl-tRNA synthetase"
/pfam="Seryl_tRNA_N Spc7 tRNA-synt_2b Pfam-B_6872"
/tigr="TIGR00414 serS 418 serine--tRNA ligase"
/product="seryl-tRNA synthetase,Serine--tRNA
ligase,seryl-tRNA synthetase,Prolyl-tRNA
synthetase,serine--tRNA ligase,tRNA synthetase class II
core domain (G, H, P, S and T)"
/translation="MLVIAQYMHDIIEYIRKNPEGFEKAMKSRGIESTAEIEIDHE
KRLTTLTKLQDLNRQRNEITEEIKKLKMSKSPCEEQIELSKSITNEIEAISLKEQAED
KLVNVLSNLPNIPAQDVPIGADENSNLEVRRYGGKRQFYFTAKSHYELGEKLGMLDFE
QAARISGSRFTILKGQLAKLGRALINCMLMHVNEFGYTEVYHPALVKNEAMYNVGQL
PKFSDDSYLTDELRLIPTSEVFLTNLVADKIMEEKELPIRFTAYSECFRKEAGSAGR
DTRGMIRQHQFGKVELVSITTEDQSNDELERMTSVAEEILKKLELPYRVMLLCSGDMG
FAAQRTYDIEVWLPQGQNKYREISSCSNCGAFQARRMNAKYSSETDKMKKYIHTLNGS
ALAIGRTIIAIMENYQNSDGSIAIPNVLQKYMSNDTVISK"
/besthit="qcoverage 100 , hcoverage 100 , similarity 99.3
, identity 99.1 , evalue 3.15e-292 , alnlength 432 ,
Bacteria , Proteobacteria , CDR78425.1 seryl-tRNA
synthetase,Serine--tRNA ligase,seryl-tRNA
synthetase,Prolyl-tRNA synthetase,serine--tRNA
ligase,tRNA synthetase class II core domain (G, H, P, S

```

```

and T) [Wolbachia endosymbiont of Drosophila simulans
wAu]"
gene      5121..7043
          /locus_tag="wEsol_01461"
CDS       5121..7043
          /locus_tag="wEsol_01461"
          /codon_start=1
          /transl_table=11
          /pfam="Peptidase_C48 Pfam-B_1859 OTU"
          /fullproduct="qcoverage 100 , hcoverage 100 , similarity
100 , identity 100 , evaluate 0.0 , alnlength 640 ,
Bacteria , Proteobacteria , WP_151807695.1 hypothetical
protein [Wolbachia endosymbiont of Nasonia oneida]"
          /translation="MLGITKNNQKESTDFAGEEFVIYATCVCLAATFAAGCLGAVIGS
PLLTFPLAMLISNPVVWVLMGIILTVAYKMVVEPLFYLAKNYINGKRAKGEKSEED
TELQDLQGKTPEKQARPKTPDRDSGIFDCKENKDSFVYKTNKKEDYKFWLSNFDIAEI
AKSYYGWMPYRKKGHREFSKGVFFSCLDNLTSFLGNRLQEYKDKVKGDNNLVLSSILN
LNNNHWVTLVISHDEKSKKFRAYYCDSFGEPLPEEVSSALQKTLGIDNSSIRNSKAKQ
QDDKYNCGIFALENAKKITDMLKAGKSFDEIDDQLKYELSSEQLIEKRKEFAKALKKD
EQSRAGTPSPVLGGPGNISRKDSGVSLDSVESKQTKIVQYNTTGDGNCFFHAVFGDNS
SGQYKTEKAQDMRMEWHKFLSQFNSLNDPRMPELLKGQMOKVFGAFLENPNHLIGMSD
SIKDLVQHTNRRVEKIKKTKNLIKLCCLTTLKENEVIGDLRSISASNLNISERKYD
RNYNSDTAANSFLNGKSIYRSYLEAISSQSYHVFIEEISILASLANIEIDVYYKNNGN
DVNTLFLPNAGMINEGYQQNNELWGNKEQETVYLAPGHYERAEIVEVEPSLMEKVSSA
IQSVVTVCVNALGLNT"
          /product="hypothetical protein"
          /besthit="qcoverage 100 , hcoverage 100 , similarity 100
, identity 100 , evaluate 0.0 , alnlength 640 , Bacteria ,
Proteobacteria , WP_151807695.1 hypothetical protein
[Wolbachia endosymbiont of Nasonia oneida]"
gene      7013..8011
          /locus_tag="wEsol_01462"
CDS       7013..8011
          /locus_tag="wEsol_01462"
          /codon_start=1
          /transl_table=11
          /fullproduct="qcoverage 96.3855421686747 , hcoverage 100
, similarity 100 , identity 100 , evaluate 2.64e-226 ,
alnlength 320 , Bacteria , Proteobacteria ,
WP_012673040.1 MULTISPECIES: tRNA dihydrouridine synthase
DusB [Wolbachia]"
          /cog="COG0042 COG0042 323 tRNA-dihydrouridine synthase"
          /pfam="IMPDH Dus DeoC DHO_dh PEP_mutase Oxidored_FMN
Pfam-B_258 FMN_dh His_biosynth ThiG NanE"
          /tigr="TIGR00737 nifR3_yhdG 319 putative TIM-barrel
protein, nifR3 family"
          /product="tRNA
dihydrouridine synthase DusB"
          /translation="MCKCARFEHIEYMSLQVGNLTIDSPVILAPMSGVTDYPFRSIVK
KLGASLLVSEMIASRAMIMQTRQSLQKAKVDALTAVQLAGCEPDVMAEAAKLNEDMGA
KIIDINFGCPVKKVNGYAGSALMRDEKKAAEIIIEAVVKAVNMPVTVKMRGTWNENR
NAPRLAKIAEDLGAKMITVHGRTRAQLYNGQADWKFVRNVKEQVKIPVIVNGDIKNLN
DIQNALKESGADGVMIGRGAYGKPWLINQAMNFLSGSETSEPTASERLSIILEHYDNI
LEYYGNDTGIIKMARKHIGWYSSGLQGSSEFRVRVNNMTDSTEVKENIIGFFGQETH"
          /besthit="qcoverage 96.3855421686747 , hcoverage 100 ,
similarity 100 , identity 100 , evaluate 2.64e-226 ,
alnlength 320 , Bacteria , Proteobacteria ,
WP_012673040.1 MULTISPECIES: tRNA dihydrouridine synthase
DusB [Wolbachia]"
gene      complement(8018..16531)

```

CDS

```
/locus_tag="wEsol_01463"
complement(8018..16531)
/locus_tag="wEsol_01463"
/codon_start=1
/transl_table=11
/pfam="RNA_pol_Rpb2_1 RNA_pol_Rpb2_2 RNA_pol_Rpb2_2
RNA_pol_Rpb2_3 RNA_pol_Rpb2_45 RNA_pol_Rpb2_6
RNA_pol_Rpb2_7 RNA_pol_Rpb1_1 RNA_pol_Rpb1_2
RNA_pol_Rpb1_3 RNA_pol_Rpb1_4 RNA_pol_Rpb1_5
Biotin_lipoyl_2"
/fullproduct="qcoverage 100 , hcoverage 100 , similarity
100 , identity 100.0 , evaluate 0.0 , alnlength 2837 ,
Bacteria , Proteobacteria , WP_174516863.1 DNA-directed
RNA polymerase subunit beta/beta' [Wolbachia endosymbiont
of Cardiocondyla obscurior]"
/translation="MVDSSYMYASGAFVPRVSYRSIDLKDSLLDLVKVQKESYDSFT
PQNGKNERLEVIFHTIFPINDPLRRATIEFISCRVDDPKYDESECIKRGVTFSAQVIA
SIRLVVMQDGLISLDEYKSIKESGDHSLKATVVKSIIEQKVHFCGLPMMTDKGTFIING
VEKVIVSQMHRSPGVFFDSDKGKTYNSGKLIYSARIIPYRGSWLDIEFDVKDHLYFRV
DRKRKLPISVLLKALGLSNNDILDRFYEKIKYVKHKDGWKVPFVDPDKFGVRLPFDLM
DIEGNVLLKANVRITSRLAKKLYDNELKEYLVPFNSICGLFLAEDLMDASSTKILSA
GESIKLEDIKKLELLSVDEISVLNIDNLFVGPYILNTLFLDENMSYQDALYEIYRVL
PGEVPVLEIVEEFFRNLFSSPEYYDLNIGRLKLNLYGLNYDEDLTVLTHEDIIEIV
KKIVLLRDGQGSVDDIDHLGNRRVRSVGEFIENQFRTGLLKLERAIVDSMSTSSLDKV
SPSDFINPKVLTNVLDRFFNSSQLSQFMDQTNPLSEITHKRRLSALGPGLTRERAGF
EVRDVHPTHYGRICPIETPEGQNI GLINSLAIYARINKYGFIESPYRKVVNRVVTQDI
EYLSAIDEGSHHIADTSVKLDENNCVDDMLYCRYAGSFVMVSSDQVSYIDVSPKQVI
SVAASLIPFLENDDANRALMGSNMQRQAVPLLKPTAPLVATGMESFVASGSGAVVLAK
RDGIVDSSDSNSIVIRAFDKERVNYLDVDIYHLRKFQRSNHNCTINQRPLVCVGDYVK
KGDVIADGPAINSGELALGKNLLVAFMSWQGYNFEDSIIISSEVVKKDLFTSIHIEEF
DCVVHDTPLGSEKITRAIPGVNEENLYHLDDSGIVKIGTRVGPYILVGVKVTPKPSLS
LPPETKLLMTIFGEKSFD CADSSLYTSPDVEGTVIDVQVFTRRGVEENERALLIKQKE
INDFEEERDYIINVTSEYFYDELKKLLINSGSQDREKFDSIEREQWWGIGLKNQSI SE
QVKSLKKDFDEKVS HAI AQFKRKVEKLHEGYDLPQGVSM SVKVFIAVKHSLQPGDKMA
GRHGNGKVISRVVPVEDMPYLEDGTPIDIILNPLGVPSRMNVGQILETHVGWACRKL
EKVSNILDEINKIKSAFCKGIRSLNDDNFTQFAVAYLDNKKIENIDDEITASVLNTP
NKNALNDELNELVENYLN SCKSSYSNLRNFLIEVYSYGSNVSICNDIRNISDNNLIEF
ARKLRDGV PVAAPVFEGPKDEQIAKL FELAGLDNSGQAVLYDGC SGEKFDRKVTVG
YMLKLHHLVDGKI HARSVGPYSLVTQQPLGGKSHFGGQRF GEMECWALQAYGAAYTLQ
EMLTVKSDDINGRVKIYESIIKGDSNFECGIPESFNVMIKELRSLCLNVDLQNDVVI
EDISHTNIAQPFNEVSISIASPESIKRISCGEIEDVSTANYRTFKVEKGGFLC PKVFG
PVNDDECLCGKYKKRRHRGRICEKCGVEVTSSKVRRERMGHIELASPVAHIWFLKSLP
SRIGALLDMSLRDIENILYSDNYIVIDPLVSPFEKGEIISEKAYNEAKDSYGIDSFVA
MQGVEAIRELLTRLDLHEIRKDLRLELESVASEIRRKIIKRLRIVENFIKSGNRPEW
MILTTPILPPDLRPLVSLESGRPAVSDLNHHYRTIINRNNRLRKL LSLNPPEIMIRN
EKRM LQEA VDSLFDNSRRNTLVNKAGAVGYKKSISDMLKGKQGRFRQNL LGRVDYSG
RSVIVVGPTLKL NQCGLPKRMALELFKPFVYSKLKMYGMAPTIKFASKLIRA EKPEVW
DMLEEVIKEHPVLLNRAPTLHRLG IQAFEPILIEGKAIQLHPLVCTAFNADFDGDQMA
VHVPI SLEAQL EARVLM MSTNNVLSPSNGRPIIVPSKDIVLG IYYLTLQEPKEDNLP
FGAFCEVEHSLSDGTLHIHSSIKYRMEYINSSGETHYKTVCTTPGRLILWQIFPKHEN
LGFDLINQILTVKEITGIVDLVYRNCGQSATVAFSDKLMVLGF EYATFSGVSFGRC
DMVIPETKATHVDHARGEIKKFSMQYQDGLITRSEYRNKVIDEWSKCTDMIANDMLKAIS
IYDGNSKYNSVYMMVNSGARGSTS QMKQLAGMRGLMTKPSGEI IETPIISNFREGLNV
FEYFNSTHGARKGLADTALKTANS GYLTRRLVDVSQNCIVTKHDC KTKNGLVVRATVE
GSTIVASLESVVLGR TAANDIYNPVTKELLVKAGELIDEDKVQKIS IAGLDVVKIRSP
LTCEISPGVCSLCYGRDLATGKIVSIGEAVGVIAAQSVGEPGTQLTMRTFHIGGMTR
GVESSNIIASINAKIKLNNSNIIIDRNGNKIVISR SCEVVLIDSLGSEKLKHSVPYGA
KLYVDESGSVKIGDKVAEWDPYTLPIITEKTGT VSYQDLKDGISITEVMDESTGISSK
VVKDWKLHSGGANLRPRIVLLDDNGKVM TLASGVEACYFIPIGAVLNVQDGQKVHAGD
VITRTPRESVKTRDITGGLPRVIELFEARRPKEHAIVSEIDGYVAFSEKDRRGKCSIL
```

```

IKPVDEQISPVEYLVSRSKHVIVNEGDFVRKGDLLMDGDPDLHDILRVLGLEALAHYM
ISEIQQVYRLQGVRIDNKHLEVILKQMLQKVEITDPGDTMYLVGESIDKLEVDRENDA
MSNSGKRSTHYLPILQGITRASLETSSFISAASFQETTKVLTEAAFCGKSDPLSGLKE
NVIVGRLIPAGTGLIMNKIRALSLCDNVDKYEKYFDIETYDEEWLMDNGCHLHSGEEE
SVVAYDQSN"
/product="DNA-directed RNA polymerase
subunit beta/beta'"
/besthit="qcoverage 100 , hcoverage 100 , similarity 100
, identity 100.0 , evalue 0.0 , alnlength 2837 , Bacteria
, Proteobacteria , WP_174516863.1 DNA-directed RNA
polymerase subunit beta/beta' [Wolbachia endosymbiont of
Cardiocondyla obscurior]"
gene complement(16590..16991)
/locus_tag="wEsol_01464"
CDS complement(16590..16991)
/locus_tag="wEsol_01464"
/codon_start=1
/transl_table=11
/fullproduct="qcoverage 100 , hcoverage 100 , similarity
100 , identity 100 , evalue 4.58e-77 , alnlength 133 ,
Bacteria , Proteobacteria , WP_015588768.1 MULTISPECIES:
50S ribosomal protein L7/L12 [unclassified Wolbachia]"
/cog="RplL COG0222 124 Ribosomal protein L7/L12"
/pfam="Pfam-B_7044 Ribosomal_L12"
/tigr="TIGR00855 L12 125 ribosomal protein L7/L12"
/product="50S ribosomal
protein L7/L12"
/translation="MSNVTSDLVDKILSLNLLSESELVKVLEEKIGLPAGSFLGGAVG
AGAPVGDNAAPAAQEKVEYKVVKEIDASKKIGVIKAVREVNSTLGLKEAKELVESL
PKDLTANVPKDEAEKIKQKLI EAGATKVELE"
/besthit="qcoverage 100 , hcoverage 100 , similarity 100
, identity 100 , evalue 4.58e-77 , alnlength 133 ,
Bacteria , Proteobacteria , WP_015588768.1 MULTISPECIES:
50S ribosomal protein L7/L12 [unclassified Wolbachia]"
gene complement(17018..17536)
/locus_tag="wEsol_01465"
CDS complement(17018..17536)
/locus_tag="wEsol_01465"
/codon_start=1
/transl_table=11
/fullproduct="qcoverage 100 , hcoverage 100 , similarity
100 , identity 100 , evalue 2.94e-110 , alnlength 172 ,
Bacteria , Proteobacteria , WP_015588767.1 MULTISPECIES:
50S ribosomal protein L10 [unclassified Wolbachia]"
/cog="RplJ COG0244 175 Ribosomal protein L10"
/pfam="Ribosomal_L10"
/product="50S ribosomal
protein L10"
/translation="MKRKNKDEFIQNTINVFVNNDFLILVNFKSINANDSLILRNNLK
SITGGVLVVKNTLARLALERTGKFSYLSGKFSGPVAIIYSSGIVEAAKLIVDFANANK
EKMSVICA AHLNELLTVEDVNKLAKLP SLDEL RVKIMRLISYDIPARLALSINSSMR
LMRVLDYYSKK"
/besthit="qcoverage 100 , hcoverage 100 , similarity 100
, identity 100 , evalue 2.94e-110 , alnlength 172 ,
Bacteria , Proteobacteria , WP_015588767.1 MULTISPECIES:
50S ribosomal protein L10 [unclassified Wolbachia]"
gene complement(17549..>17990)
/locus_tag="wEsol_01466"
CDS complement(17549..>17990)
/locus_tag="wEsol_01466"

```

```

/codon_start=1
/transl_table=11
/product="ribosomal protein L1"
/pfam="Ribosomal_L1"
/tigr="TIGR01169_rplA_bact_227"
/translation="AEKAGADIAGGEDLVEEIKKGRKLDVDWCITTPDFMAKITPIAK
VLGAKGLMPNPKFGTIVTSNIAEAIKTIKSGQIKFRITDKNGVIHGKLGNIKFDIDDLLE
NLKAFLKVIKDNKPISVKGVYFKGVFLNSTMGKAYKISKVEDII"
/cog="RplA COG0081 228 Ribosomal protein L1"
/besthit="qcoverage 100 , hcoverage 67.2811059907834 ,
similarity 100 , identity 100 , evalue 7.52e-98 ,
alnlength 146 , Bacteria , Proteobacteria ,
WP_015588766.1 MULTISPECIES: 50S ribosomal protein L1
[unclassified Wolbachia]"

```

# ORIGIN

```

1  agatagtata gctgttgaga aagtgttaag agtagctaaa gaaaacggta ttctgagaga
61  tattcttgac acaacaataa ctataaaaca tttagatagc cgggaagtga cttacacacc
121 acttgctcat gctatgttct gggaggatgg caaaattatt aaagaaattc tagtagcagc
181 tgaagagaac agtattctga aagatattct tgacgcaaca acaactataa aatatctaga
241 tgggtcaagaa gaaactttac acaccgctta cttacgccat atcatgtaaa agatagcaaa
301 actattgaag aaatttttaa agtctctaaa gaaacgatat tctgaaagac attcttgacg
361 caacaacaac tataaaatat ctagatgggc agaaaggaaa tttacacacc gcttacttac
421 gctatatcat gtaaaagata gcaaaactat tgaagaaatt taaaaaatct ctaaagaaaa
481 cggtattctg aaagatatct ttgatgcaac acaactata aaatgtccag atgggtcatga
541 agaaacttgc gcaccgctta cttatgctat actacgtaaa gatagtatag ctggtgagaa
601 aatgttaaga gtagctaaag aaaacgatat tctgaaagac attcttgacg caacaacaac
661 tataaaacat tcagatagcc ggggaagtaac ttacacacta cttgcttatg ctatactgcg
721 tgaaaatagt atagctattg aagaaatctt aaaaatctct aaggagaaca gtattctgaa
781 agatattctt aacgcaacaa taactataaa atgtccagat ggtcggagag taactgttac
841 accacttgct tatgctatac tacgtaaaga tagtatggct gttgagaaaa tgttaagagt
901 agctaaagaa aacgggtattc tgaaagacat tcttgacgca acaacaacta taaaatatcc
961 agatggtcag gaagaaactt gcacaccact tgcttatgct atactacgta aagatagtat
1021 agctgttgag aaaatgttaa gagtagctaa agaaaacggg attctgaaag acattcttaa
1081 cacaacaata accataaaac ataaaaataa tcaaaaagta actgataagt tacttgccgc
1141 attacatgat cgcaaagtta ttcaagaaat tttagacata gctagagaaa acgatattct
1201 gaaagacatt cttaatgcaa caataactat aaaatatcca gatagtgaag aaaaaatcta
1261 cacaccactt acttatacaa tatcatgtaa aagcaacgaa gcttttaata caacaagagc
1321 tataaatcaa gatggtcagg aaaaaactca catcccattt cctaccgttt ccgctactga
1381 tgaaagagaa actgaattaa aattaaaaga aaaaagacaa agtagaagag atgaggggatt
1441 aaattttaac aatggtagta gtgacaaaaa tgttgaaata aaagttaatg gggatatctt
1501 gttgcagcat agtagtgtaa ctaaaaatga aataaatcat actgctgtac gtaatgatgt
1561 aggggggggg taaagcttcc tatagaaagt agaacaaatg ttaaagtacg gaatataagt
1621 ggatgcaaag taatgactgt agcttctatg gtgattgagt tggtagatag taaagcgaca
1681 tgtgtactgt taaaaccac cactaaattg gaagaagtag ctataacata ttttcaaggt
1741 ttaacactat atttatgaaa cttaatttat atgtgctaaa caagatgctg attagtttta
1801 tagctaacce aagaaagggt tccctacgtc ataccgccgc ggtatctcta gatcccgcta
1861 acacgtagcg ggatgacgat tgtcgtttag ctataaacat taagaaattt accaaacgaa
1921 aaaaaaggca aaagaagccc tggggttatt atccgcttta aaatattggc gttttttatg
1981 ttttaaacgc ttgacaagcg agattcagcc gcttttaatt gcaactaact tacgctgcaa
2041 atgtttaaga aatttactaa gcagaaaaaa agacaaagaa tccccgaggt agctagtctt
2101 ttactatctc tgtcgagtat tggcattttt tgatgtcttg taacgcttta taagcgctt
2161 cagcttattt agataaaaaa ctagatgtag atgaagtttt gtaaagacat acagtatcta
2221 tatactgcaa aaaattgaac ataagacgcc gatacattaa gtaatcctta ccttttaatc
2281 tgcagattgg cgaaagcaaa tacaatagct tcagtttcat gataaggggg ctggcgaggt
2341 ttgtcaagga agtttttcgt ttctgtgaac cacctgctaa ccgacagcta acattaacta
2401 ccgatatcgt atctgaagaa gccccctggc cattctaaaa aatttaatgc tgagtacagc
2461 ttacttttgg ctctctctat agtgctccct tctgtacta tatttagcac tcttccgcca
2521 tcggaaacta agttaccact ttcctcgaat ttagtaccag catgaaacac caacacacca
2581 ggaatgcttt caatcttatc taatccttta attacttctc ctttttgata atcaccggga
2641 tagcctttac ttgcaacaac tacacaaact gtagatttgt tgtaaagttc caccattttg

```

|      |             |             |             |             |             |            |
|------|-------------|-------------|-------------|-------------|-------------|------------|
| 2701 | acattttaact | ttcctttctgc | aactgacaac  | atcaattttta | acaaatcgca  | atttgaatca |
| 2761 | aatctaggta  | atatagattg  | cgttttctgga | tcaccgaatc  | taacggtata  | ctcgagaagt |
| 2821 | tttgggctat  | ctttgcaa    | tattaaacca  | gcaaagagta  | ctcctttata  | agacgtacc  |
| 2881 | atgttaacca  | atgcttgagc  | tgtagggtat  | attatTTTTT  | ggataatTTT  | ttgctccatg |
| 2941 | tccttactta  | taattgaagg  | tgatgagtac  | gaccccat    | ctccagtatt  | ttggctttca |
| 3001 | ttacttttcat | caactctctt  | ataatctttt  | gcacacccaa  | gagttactac  | tttcaaccca |
| 3061 | tcaataagag  | caaaaaaact  | tactttcttct | ccaactaaaa  | actcttctat  | gattatTTTt |
| 3121 | tcacctgatt  | caccaaattt  | tttctccact  | agcattgaat  | ttatttgctga | aaaagcttcg |
| 3181 | ctttctgtat  | tacatataac  | cacccctttt  | cctgctgcaa  | ttccatttgc  | tttactaca  |
| 3241 | agtggaaact  | ttatTTTtatt | gctacgtaca  | aaatctttag  | ctaacccttc  | atcaacaaaa |
| 3301 | cactcgact   | tggcagttgg  | tataccatat  | cgtttacata  | gtcccttggt  | gaaagacttc |
| 3361 | gatccctcaa  | gttttgca    | tgcttgactt  | ggagcaaaaa  | catttattcc  | ctctgcaact |
| 3421 | aaatcatcag  | caagcccatc  | aattattggt  | tgttctggac  | caataacaac  | caactctata |
| 3481 | ttttctctct  | tgcaaaattg  | tgtaacatct  | actgaatTTT  | gaatattttac | atccacaaga |
| 3541 | gccccaa     | ctttcatagc  | ttggcgacca  | ggagttacat  | ataactcagt  | caagatagga |
| 3601 | gattTTTTTT  | gagcccaaag  | tagagcgtgc  | tcacgtccac  | cagaacctat  | aaccagaacc |
| 3661 | ttcatctTTT  | tttctctgct  | tttctatatg  | tcaaaattat  | tatttgctta  | taacagtatc |
| 3721 | attactcatg  | tattttttgca | acacgtttgg  | tattgcaatc  | gaccctcag   | aattttgata |
| 3781 | attctccatt  | atggcaataa  | tcgttcttcc  | tatagctaaa  | gctgagccgt  | ttaaagtgtg |
| 3841 | aatatatTTT  | ttcatctTTT  | tatcagtttc  | tgaagagtat  | ttagcgttca  | tccttcttgc |
| 3901 | ttgaaatgca  | ccacaatttg  | agcagcttga  | tatttctcta  | tatttatTTT  | gccaggttaa |
| 3961 | ccatacctct  | atgtcataag  | tcctttgtgc  | agcaaaaccc  | atatcgccac  | tgcaaagcag |
| 4021 | cattactctg  | tatggcaatt  | ctaattTTTT  | taatatctct  | tcagcaacac  | tcgtcatacg |
| 4081 | ctcaagctca  | tcatttgatt  | ggtcttcagt  | tgtgatgctt  | accaactcca  | ctttaccaa  |
| 4141 | ttggtgttgc  | cttatcatgc  | ccctggatat  | gcgacctgca  | ctacctgctt  | ctttacgaaa |
| 4201 | gcactccgaa  | tatgcagtaa  | agcgaatagg  | cagttctTTT  | tcttccatta  | ttttgtcagc |
| 4261 | aactaaattt  | gttaaaaaaca | cttcacttgt  | gggaatcaac  | ctcaattcgt  | cggtagttaa |
| 4321 | atacgaatcg  | tcagaaaatt  | tcggtagctg  | accaacatta  | tacatagctt  | cgTTTTTcac |
| 4381 | caaagccggg  | tggtacacct  | cagtatagcc  | aaattcatta  | acatgcattt  | caagcataca |
| 4441 | atttatttagc | gctcgtccaa  | gcttagctaa  | ctgtcctTTT  | aatatcgtaa  | atcttgatcc |
| 4501 | ggaaattctc  | gccgcttggt  | cgaagtccat  | taaacctaac  | ttttccccga  | gctcataatg |
| 4561 | agattttgct  | gtaaaaataaa | actgtctTTT  | tcctccatat  | cttctcacct  | ctaaattaga |
| 4621 | gttctcatct  | gcgcctattg  | gcacatcttg  | cgcaggaata  | ttcggcaagt  | tagataaaac |
| 4681 | attcactaac  | ttatcctTTT  | ctgcttgttc  | ttttaagctg  | attgcctcta  | tctcatttgt |
| 4741 | gatgctTTTT  | gacaactcta  | tttgctcttc  | acaggggctc  | ttgctcattt  | taagctTTTT |
| 4801 | tatttctctc  | gtgatttcat  | tgcgctgcct  | attcaaatcc  | tgcagtttag  | tggttaatga |
| 4861 | tcctttctcg  | tgatcgattt  | ctaatatctc  | ttccgcagta  | gattctctaa  | ttccctgct  |
| 4921 | tttcattgcc  | ttttcaaatc  | cttcagggtt  | tttgcgtata  | tattctatat  | cgtgcatata |
| 4981 | ttgtgctatt  | actaacattg  | ttactgtact  | ccaaaagctc  | ttaatattca  | atatattctc |
| 5041 | atactactaa  | aattattatg  | gttgattTTT  | ttgttagaat  | ttgttaaaat  | ttaattaact |
| 5101 | tagcgttcat  | agggtgtagt  | atgttgggta  | ttacaaaaaa  | taatcagaaa  | gagagcactg |
| 5161 | actttgctgg  | tgagggaattc | gttatctacg  | ctacttgtgt  | atgcctagca  | gccacattcg |
| 5221 | ctgctggctg  | tttagggcg   | gtaataggat  | cccctctatt  | gacctttcca  | cttgctatgc |
| 5281 | tcatctctaa  | ccccgtagtt  | tgggttttaa  | tgggaataat  | tcttacagta  | gcatacaaaa |
| 5341 | tgggtgttga  | acctttattt  | tacttagcga  | agaactatat  | taatggaaaa  | agagcttcaa |
| 5401 | agggggaaaa  | gagtgaagaa  | aaagatacag  | aactacaaga  | tttgcaaggc  | aagactccag |
| 5461 | aaaagcaagc  | aagaccgaaa  | actcctgata  | gggatagtgg  | tatttttgac  | tgcaagaaaa |
| 5521 | ataaggattc  | ttttgtatat  | aagacaaata  | aaaaagaaga  | ttataaattt  | tggttaagta |
| 5581 | attttgat    | tgcaagatt   | gcaaaaagtt  | actatggatg  | gatgccatat  | cgtaaaaaag |
| 5641 | gtcacaggga  | attttccaaa  | ggagtgttct  | tttcttgctt  | cgataatctt  | acatcttttc |
| 5701 | tggggaaccg  | attgcaagaa  | tataaagata  | aagtaaaagg  | ggataacaat  | ttagtattat |
| 5761 | cttcaattct  | taacttaaat  | aacaatcatt  | gggtaacatt  | ggttatttct  | catgatgaaa |
| 5821 | agagtaaaaa  | gttttagagca | tattattg    | attcatttgg  | tgaaccatta  | ccagaagagg |
| 5881 | tatcaagtgc  | gctacagaaa  | actctaggaa  | tagacaatag  | tagtattaga  | aactcaaaag |
| 5941 | ctaaacaaca  | agatgataag  | tataattgtg  | gaatatttgc  | cttagagaat  | gctaagaaaa |
| 6001 | ttacagatat  | gctgaaagca  | ggcaaatcgt  | ttgatgaaat  | tgatgatcag  | ctaaaatatg |
| 6061 | aacttagttc  | agagcaatta  | atagagaaga  | gaaaagaatt  | tgcaaaagcg  | ttgaaaaagg |
| 6121 | atgaacaaag  | cagggctggc  | acgccaaagg  | ctgtattagg  | tgggtccagga | aatataagtc |
| 6181 | gtaaagatag  | cgagtaagt</ |             |             |             |            |

|      |             |             |             |              |             |             |
|------|-------------|-------------|-------------|--------------|-------------|-------------|
| 6301 | gtcaatataa  | aactgaaaaa  | gcacaagata  | tgagaatgga   | atggcacaaa  | tttttaagtc  |
| 6361 | aattttaactc | tttgaatgat  | ccaaggatgc  | ctgagttatt   | gaagggacag  | atgcagaaag  |
| 6421 | tttttggtgc  | attcttagaa  | aatccaaatc  | atgtgattgg   | tatgtcggac  | tcaataaaag  |
| 6481 | atgttggttca | gcatacaaac  | agacgggtag  | agaagatcaa   | aaaaaagact  | aataaattaa  |
| 6541 | taaaaaagtt  | atggtgtctt  | acaacattaa  | aagaaaatga   | agttataggt  | gatttaagaa  |
| 6601 | gcattagtgc  | tagtaatctc  | aatattagtgc | aaagaaaata   | tgatagaaat  | tataatagtg  |
| 6661 | atactgcagc  | aaattctttt  | ctcaatggca  | aatccattta   | tagatcttat  | ctagaggcaa  |
| 6721 | tcagcagcca  | aagttaccat  | gttttcatag  | aagaaatttc   | tatcttagct  | tcgctggcta  |
| 6781 | atattgaaat  | tgacgtctac  | tataaaaaata | atggtaatatga | tgtaaataca  | ttgtttctgc  |
| 6841 | caaatgcggg  | aatgataaat  | gaaggttatc  | agcagaacaa   | cgagctatgg  | ggaaataaag  |
| 6901 | aacaagaaac  | ggtatacttg  | gcacctgggc  | attatgagag   | agctgagata  | gtagaggtag  |
| 6961 | agccttctct  | tatggaaaaa  | gtaagttcgg  | ctatacaaaag  | tggttgtaaca | gtatgtgtaa  |
| 7021 | atgcgctagg  | tttgaacaca  | tagaatatat  | gtccctacaa   | gtaggaaatt  | tgacaattga  |
| 7081 | ttctccagtt  | attttagctc  | caatgtctgg  | agtgactgat   | tatccgttta  | gaagtattgt  |
| 7141 | gaagaaactt  | ggtgcaagtt  | tgtagtttcc  | agagatgatc   | gcaagcagag  | ctatgattat  |
| 7201 | gcaaaactcg  | cagagtttgc  | aaaaagcaaa  | agtcgatgca   | ttaactgctg  | tgcagcttgc  |
| 7261 | tgggtgtgag  | ccagatgtta  | tggcggaggc  | tgcaaaaatta  | aacgaggaca  | tgggagcaaa  |
| 7321 | aattatagac  | ataaactttg  | gttgccctgt  | taaaaaagtt   | gtaaacgggt  | atgcaggatc  |
| 7381 | agcgctaata  | cgtgatgaga  | aaaaagccgc  | tgagataaatt  | gaagctgtgg  | tcaaagcagt  |
| 7441 | gaatatgccca | gttacgggtga | aaatgcgcac  | tggatggaac   | gatgaaaatc  | gaaatgcccc  |
| 7501 | gagacttgcg  | aaaattgccg  | aagacttagg  | agcaaaaatg   | atcactgtgc  | atggaagaac  |
| 7561 | aagagcgag   | ctttataatg  | gtcaagcaga  | ttggaaaattc  | gttagaaatg  | ttaaagagca  |
| 7621 | agtgaataat  | ccagtttatag | taaatggcga  | tattaaaaat   | ttaaatgata  | ttcagaatgc  |
| 7681 | tctcaaagaa  | tctggagcag  | acggagtgat  | gatagggtcgt  | gggtgcctacg | gtaaaccttg  |
| 7741 | gctgattaat  | caagcaatga  | actttctcag  | tggagtgaa    | acttctgagc  | caacagcttc  |
| 7801 | agagagatta  | agcatcatac  | tcgagcatta  | cgacaatatt   | cttgagtact  | atggaaatga  |
| 7861 | cacaggaata  | aagatggccc  | gcaaacacat  | aggttggtac   | agtagcgggc  | ttcaaggctc  |
| 7921 | atctgaattt  | cgtgtgagag  | taaataacat  | gacagatagc   | acagaagtga  | aagaaaatat  |
| 7981 | tattggcttt  | tttgggtcaag | agacacacta  | gctgtactca   | attcgactga  | tcgtatgccca |
| 8041 | ctacgctctc  | ttcctcacca  | gagtgtaaat  | gacaaccatt   | atccatcaac  | cattcctcgt  |
| 8101 | cataagtttc  | aatatcaaaa  | tatttttcat  | atztatccac   | attatcacaa  | agtgaagtg   |
| 8161 | ctctgatctt  | attcataatc  | aaacctgtac  | cagcaggaat   | taatcttcct  | actataacat  |
| 8221 | tttcttttaa  | tccacttaaa  | ggatcactct  | tcccgcagaa   | tgctgcttct  | gtaagtactt  |
| 8281 | ttgttgtctc  | ttggaaagag  | gcagcagaaa  | taaaggagct   | agtttcaaga  | cttgccctag  |
| 8341 | taatccccctg | cagaatagga  | agataatgag  | tagaccgttt   | gccagagtta  | ctcatagcat  |
| 8401 | cattttccct  | atcaacttcc  | agcttgtcaa  | tgctttcgcc   | aaccaagtac  | atagtatcac  |
| 8461 | caggatcagt  | aattttccact | ttttgtagca  | tttgtttttaa  | gatcacctct  | aaatgcttat  |
| 8521 | tgtctatacg  | aacaccctgc  | aatctataaaa | cttgctgtat   | ttcagaaaatc | atatagtgcg  |
| 8581 | ctaaagcttc  | taacccaagc  | acacgtaaaa  | tatcatggag   | atcagggtca  | ccatccatca  |
| 8641 | atagatcacc  | tttacgtaca  | aatcacctt   | cattgactat   | tacatgctta  | cttcttgata  |
| 8701 | ccaaatatct  | aactggagaa  | atgtgttcat  | ctacaggttt   | aattaatata  | ctgcattttc  |
| 8761 | ctctacggtc  | tttttcagaa  | aacgctacat  | agccatctat   | ctcactaaca  | atagcatgct  |
| 8821 | ctttaggacg  | acgtgcttca  | aataactcta  | taaccctcgg   | taaaccacca  | gtaatatcac  |
| 8881 | gagtttttaac | tgactctctt  | ggtgttcttg  | taataacatc   | acctgcatga  | accttctggc  |
| 8941 | catcttgtag  | attgagcact  | gcaccgattg  | gtataaaaata  | acatgcttca  | acgccacttg  |
| 9001 | cgagtgtcat  | tactttacca  | ttatcgtcaa  | gcagcacaat   | acgaggacgt  | aaattagctc  |
| 9061 | caccagaatg  | caatttccag  | tcttttacta  | ctttgcttga   | tattcctgta  | gattcatcca  |
| 9121 | tcacttcagt  | gatcgaaaat  | ccatctttta  | agtcctgata   | agacactgta  | ccagtcttct  |
| 9181 | ccgtgataat  | aggcaatgta  | taaggatccc  | attccgcaac   | tttatcgcca  | atttttactg  |
| 9241 | acccactctc  | atctacataa  | agcttagcgc  | cgtaaggtag   | actgtgcttc  | aacttctcac  |
| 9301 | taccaaggct  | atcaatcaac  | acgacttcac  | aggaacggct   | tatcacaaat  | ttatttccgt  |
| 9361 | ttctatctat  | aattatatta  | ctattgttta  | actttatttt   | agcattaata  | gaagctataa  |
| 9421 | tattcgagga  | ttcaacgcct  | ctagtcatta  | ctccacctat   | atgaaaagta  | cgcatcgtaa  |
| 9481 | actgagtacc  | tggctctcca  | acagattgag  | cagctataac   | accaactgct  | tcacctattg  |
| 9541 | aaacaatttt  | accagttgca  | aggtctcttc  | cataacataa   | agaacataca  | ccaggactta  |
| 9601 | tttcacaagt  | taaaggcgat  | ctaattttta  | caacatcaag   | acctgcaatg  | ctgatttgct  |
| 9661 | ttacttttatc | ctcatcaatt  | aattcccctg  | cttttactaa   | taattctttt  | gtcactgggt  |
| 9721 | tatatatatc  | atgtgcagct  | gttctaccca  | gcacaacact   | ctctagagat  | gcaactatag  |
| 9781 | tacttccttc  | aactgtagct  | ctcacaacaa  | gaccattttt   | tgttttacag  | tcatgctttg  |
| 9841 | taactatgca  | attttgagat  | acatcaacta  | aacgcagagt   | taagtatcca  | gagtttgcag  |

|       |             |             |             |             |             |             |
|-------|-------------|-------------|-------------|-------------|-------------|-------------|
| 9901  | ttttaagtgc  | agtgtcagct  | aaacctttac  | gcgaccgtg   | agtagaatta  | aagtattcaa  |
| 9961  | atacgttcaa  | tccttcacgg  | aaattagaaa  | ttataggtgt  | ttctataatc  | tcaccagaag  |
| 10021 | gtttggtcat  | gagccctcgc  | attcctgcta  | gctgtttcat  | ctgtgaagta  | gaaccccttg  |
| 10081 | caccagagtt  | aaccatcata  | tacactgagt  | tgtacttact  | atctccatca  | tatatagata  |
| 10141 | ttgcttttaa  | catatcatta  | gctatcatat  | ccgtacactt  | agaccattca  | tctataacct  |
| 10201 | tgttatacct  | ctcacttcta  | gttattagcc  | catcttgata  | ttgcatagag  | aattttcttaa |
| 10261 | tttcacccct  | cgcgtgatca  | acatgtgtag  | ctttagtttc  | aggtataacc  | atatcacaac  |
| 10321 | gaccaaaga   | gacaccagaa  | aatgtggcat  | actcaaagcc  | aagtaccatt  | aatttatcag  |
| 10381 | aaaatgccac  | tgtagcactt  | tgaccacagt  | tacgatatac  | caaatcaact  | ataccagtta  |
| 10441 | tttccttgac  | tgtaaatatc  | tgatttatta  | gatcgaagcc  | tagattctca  | tgcttaggaa  |
| 10501 | aaatttgcca  | taatattaaa  | cggccaggag  | ttgtacaaac  | agttttatag  | tgagtttcac  |
| 10561 | cgctgctatt  | aatatactcc  | atcctatact  | ttatactaga  | atgaatatgt  | aaagtaccat  |
| 10621 | cactcaagga  | atgctcaact  | tcacaaaaag  | caccaaaga   | tggtaaatta  | tcttccttag  |
| 10681 | gttcttgtaa  | agtcagataa  | tatataccaa  | gtactatatc  | tttactagga  | actataatcg  |
| 10741 | gtctgccatt  | agaaggactt  | aaaacgttat  | tagtggacat  | catcaacacc  | ctagcttcaa  |
| 10801 | gctgagcttc  | caatgaaatt  | ggcacatgca  | ctgccatttg  | atcaccatca  | aaatcagcat  |
| 10861 | taaacgccgt  | acagacaagc  | ggatgaagct  | gtattgcttt  | gccttcaata  | aggattggct  |
| 10921 | caaaagcctg  | aataccaagt  | ctatgtagcg  | taggcgctct  | attcaacaaa  | acaggatgct  |
| 10981 | cttttattac  | ctcttcaagc  | atatcccaaa  | cttctggttt  | ttctgctctt  | atcaacttac  |
| 11041 | tagcaaactt  | aatagttgga  | gccataccat  | acatcttaag  | ctttgagtaa  | acaaaagggt  |
| 11101 | tgaatagttc  | aagagccatt  | ctttttggta  | atccacactg  | atthagtttc  | aaagttggac  |
| 11161 | caacaactat  | tacagaacgt  | ccagagtagt  | ctaccctttt  | tcctaagagg  | ttctggcgaa  |
| 11221 | aacgaccctg  | ttttcctttt  | aacatatcac  | taatggactt  | tttatatcca  | acagcaccag  |
| 11281 | ctttatttac  | caaagtatta  | cgacgactat  | tatcaaaaag  | agaatcaact  | gcttcttgta  |
| 11341 | acatcctttt  | ttcattacga  | atcataatct  | caggaggatt  | taagctcaac  | aatttcctca  |
| 11401 | acctgttatt  | tctattaata  | atagtcctat  | aatgatgatt  | cagatcagaa  | actgcaggac  |
| 11461 | gaccactctc  | aagcgatacc  | aaaggacgca  | aatcaggtgg  | taaaataggt  | atagttgtaa  |
| 11521 | gtatcatcca  | ctcaggccta  | tttcagagatt | taatgaagtt  | ttcaacaata  | cgcaatctct  |
| 11581 | ttataatttt  | ctttcttctt  | atctcagaag  | caacagattc  | taattctagt  | cttaaatcct  |
| 11641 | tcctaatttc  | atgtaaatca  | aggcgcggtta | gcaactctct  | tatagcttca  | acaccttgca  |
| 11701 | tagctacaaa  | actatcgatc  | ccatagctat  | ctttagcttc  | attataagct  | ttttcactaa  |
| 11761 | taatctcacc  | ttttttcaaaa | ggcgaaaacaa | gaggatctat  | tacgatataa  | ttatcgctat  |
| 11821 | ataaaaatatt | ctcaatatct  | ctgagagaca  | tatctaataa  | tgctccaatt  | cttgaaggaa  |
| 11881 | gcgattttcaa | aaaccatata  | tgagcaacag  | gagatgcaag  | ctctatatga  | cccatccttt  |
| 11941 | ctcttctttac | ttttagaagat | gtaacttcta  | ctccgcattt  | ttcgcatatg  | cgacctctgt  |
| 12001 | gtcttctttt  | tttgatattt  | ccacataaac  | attcatcgtc  | attgacaggg  | ccaaaaacct  |
| 12061 | taggggcaaaa | taatccacct  | ttctcaactt  | tgaacgtacg  | ataatttgca  | gttgaaacat  |
| 12121 | cttctatctc  | accacaagat  | atacgcttaa  | tactttcagg  | gctagcaatc  | gatatgctaa  |
| 12181 | cctcattaaa  | aggttgtgca  | atgttagtgt  | gagatatatc  | ttcaatcact  | acatcatttt  |
| 12241 | gctttaaatc  | tacattttaa  | cataaagaac  | gtagttcttt  | tatcatcaca  | ttaaaggatt  |
| 12301 | caggaatttc  | acattcaaaa  | ttactgtcac  | cttttattat  | cgattcataa  | atcttaactc  |
| 12361 | taccattaat  | atcatcagac  | ttcacagtta  | acatttcctg  | caaagtataa  | gcagcaccat  |
| 12421 | aggcttgtaa  | tgcccaacat  | tccatttcac  | caaaacgctg  | accaccaaaa  | tgagattttc  |
| 12481 | ctccaagagg  | ttggtgagta  | accaaactat  | aaggccctac  | tgaacgcgca  | tgaattttac  |
| 12541 | catcaaccaa  | gtggtgcaac  | ttaagcatgt  | acatgtaacc  | aactgtaacc  | ttgcggtcga  |
| 12601 | atttttcacc  | actgcaaccg  | tcatataata  | cagcttgctc  | agagttatct  | aaaccagcaa  |
| 12661 | gttcaaataa  | ttttgctatt  | tgttcatctt  | ttggaccctc  | aaatacaggt  | gcagcaacag  |
| 12721 | gaacgccatc  | acgtaatttg  | cgtgcaaat   | caatgagatt  | attatcacta  | atattacgaa  |
| 12781 | tatcattaca  | gatagatacg  | ttactgccat  | agctataaac  | ctcaatcagg  | aagttacgta  |
| 12841 | aattgctgta  | tgaactttta  | caagagttca  | aatagttctc  | tactaactca  | ttcaactcgt  |
| 12901 | catttagtgc  | attcttatta  | ggtgtattta  | aaacagaagc  | cgttattttca | tcatcatcaa  |
| 12961 | tattttcaat  | ttttttatta  | tcaaggtagt  | ctactgcaaa  | ttgtgtaaaa  | ttatcatcgt  |
| 13021 | taagggacct  | aattcccttg  | caaaaagcac  | ttttgatctt  | attgatctca  | tcgagaatat  |
| 13081 | tacttacctt  | ttccccta    | tttctacaag  | cccaacctac  | atgcgttttc  | agtatttgcc  |
| 13141 | ctacattcat  | tcgtgaagga  | acaccaagag  | ggttaagaat  | aatatcaata  | ggagtaccat  |
| 13201 | cttccaaata  | aggcataatc  | tccactggca  | caactcgaga  | aatcacacct  | ttattttccat |
| 13261 | gtctaccagc  | cattttatcc  | cctgggttgca | gactatgttt  | cacagcaatg  | aaaactttta  |
| 13321 | ctgacatcga  | cacaccttga  | ggcaggtcat  | aaccttcatg  | taatttttct  | acttttcgct  |
| 13381 | taaactgtgc  | tattgcatgt  | gatacttttt  | catcaaaaatc | tttttttaag  | ctcttaactt  |
| 13441 | gctcagaaat  | ggattggttt  | tttaatccta  | tacccacca   | ttgctcacgt  | tcaatagagt  |

|       |             |             |             |             |             |             |
|-------|-------------|-------------|-------------|-------------|-------------|-------------|
| 13501 | caaatttttc  | togatcttga  | gaaccagaat  | taataagaag  | tttcttcaat  | tcatcataga  |
| 13561 | aatattcact  | agtaacattg  | attatataat  | ctcgcctctc  | ctcaaagtca  | tttatctctt  |
| 13621 | tttgtttgat  | gagtaatgcc  | ctttcatttt  | cttcaacccc  | cctgcgtgta  | aagacttgta  |
| 13681 | catcaattac  | tgtcccttca  | acatctggag  | atgtatataa  | agaggaatcc  | gcacaatcga  |
| 13741 | atgacttttc  | acaaaaaatt  | gtcattaata  | acttcgtttc  | aggaggcaat  | gaaagagaag  |
| 13801 | gtttaggtgt  | aactttacct  | accagaatat  | agcctggacc  | aactcttgta  | ccaattttca  |
| 13861 | ctataccact  | atcatccaag  | tgatatagat  | tttcttcatt  | aacaccaggt  | atagcacgag  |
| 13921 | ttattttttc  | tgatcctaaa  | ggggtatcat  | gtacaacaca  | gtcaaattct  | tctatatgaa  |
| 13981 | tagaagtaaa  | gagatctttt  | ttaacaactt  | cactagaaat  | aataatagag  | tcttcaaaat  |
| 14041 | tataaccttg  | ccaagacata  | aaagcgacta  | gcaaattttt  | accaagcgcc  | aactcaccac  |
| 14101 | tgtaaatgca  | aggaccatca  | gctattacat  | cacccttttt  | aacataatca  | cctacgcaca  |
| 14161 | ctagcggctc  | ttgattaata  | caagtattat  | ggttagaacg  | ctgaaacttc  | cttagatgat  |
| 14221 | aaatatctac  | gtccaagtag  | ttaacccttt  | ctttatcaaa  | agcacgtata  | actatagagt  |
| 14281 | tactatcaga  | actatcaact  | atgccatcgc  | gttttgctaa  | aactacagca  | ccagagccag  |
| 14341 | aagctacaaa  | agactccata  | ccagtagcaa  | ccagaggagc  | ggtaggcttc  | aataaaggta  |
| 14401 | cggcctgacg  | ttgcatattt  | gagcccatta  | atgctctatt  | agcatcatca  | ttttctaaaa  |
| 14461 | atggaatcaa  | ggaagctgca  | actgatatta  | cctgcttagg  | agatacgtca  | atgtaactaa  |
| 14521 | cttggtcgct  | acttaccatg  | acgaagctac  | cagcatatct  | acagtatagc  | atgtcatcaa  |
| 14581 | caaagcaatt  | attttcatca  | agctttacgc  | tagtgtcagc  | tatatgatgt  | gagccttcgt  |
| 14641 | ctatagcaga  | aagatactca  | atttgatcag  | taacaaccct  | attgactact  | tttctataag  |
| 14701 | ggctttcaat  | gaaaccatat  | ttattaatac  | gcgcgtatat  | agctaagctg  | ttgattaacc  |
| 14761 | ctatattttg  | cccttcagga  | gtctcaatag  | ggcaaattct  | tccataatga  | gttggtatgaa |
| 14821 | catcacgcac  | ctcaaatcct  | gcccgttctc  | ttgttaaacc  | gccaggacct  | aacgcggata  |
| 14881 | accttctttt  | atgtgttatt  | tcagataacg  | gattagtctg  | atccataaat  | tgagataatt  |
| 14941 | gagaagaatt  | gaagaaatct  | cttaagacat  | tagttaacac  | ttttggatta  | ataaaatcag  |
| 15001 | atggagaaac  | tttatctaaa  | ctagaagtgg  | acatagaatc  | aactattgcg  | cgttccaatt  |
| 15061 | tcaacaaccc  | agttctaaat  | tgattttcta  | taaactctcc  | aactgatctt  | actcttctgt  |
| 15121 | ttcctaaatg  | atcaatatca  | tctacagatc  | cttgaccgtc  | acgtaacaat  | actatttttt  |
| 15181 | tcacaatttc  | aataatatct  | tcatgcgtta  | aaacagttaa  | atcctcatca  | taatttaatc  |
| 15241 | caaggtaaga  | gttaagcttc  | aacctaccaa  | tgttagacaa  | atcataatat  | tccggactga  |
| 15301 | agaaaagggt  | acggaaaaac  | tcttctacta  | tctctaaaac  | aggaacttca  | ccaggacgca  |
| 15361 | aaactctata  | tatttcatat  | agtgcatacct | gataagacat  | gttttcatct  | aagaaaagcg  |
| 15421 | tatttaatat  | ataagggtcca | acaaacaaat  | tatctatggt  | caacactgat  | atttcatcta  |
| 15481 | cagataataa  | ctcaagcttc  | tttatgtctt  | ccagctttat  | agattcacca  | gcagataaaa  |
| 15541 | ttttcgtaga  | gctagcacta  | tccattaaat  | cttctgcgag  | gaataaacca  | catatagaat  |
| 15601 | taaaaggaac  | cagataactct | ttcaattcat  | tatcatatag  | cttttttagct | agtcttgagg  |
| 15661 | taatacgaac  | gttagcttta  | agcagcacat  | taccttcaat  | atccattaag  | tcgaaaaggca |
| 15721 | gcctcactcc  | tttaaattta  | tcaggaacaa  | aaggcacttt  | ccaaccatct  | ttatgtttta  |
| 15781 | catactttat  | tttctcataa  | aatctatcga  | gtatatcatt  | at ttgataaa | cccaacgcct  |
| 15841 | ttaataaaac  | tgagattggc  | aattttcttt  | ttctatcaac  | acgaaaatac  | aatgggtctt  |
| 15901 | taacatcaaa  | ttcaatatca  | agccaagaac  | ccctataagg  | aataattcta  | gcagaataga  |
| 15961 | tcaatttacc  | agaattgtaa  | gtttttccct  | tatcgctatc  | aaagaataca  | ccaggagacc  |
| 16021 | tatgcatttg  | tgagacgata  | actttttcca  | caccattaat  | gatgaaagtg  | cccttatcag  |
| 16081 | tcatcatagg  | caaccacaaa  | aagtggactt  | tctgctcttc  | tatagatttt  | acaacggttg  |
| 16141 | caagttttaga | atgatctcca  | ctctctttta  | tcgatttata  | ttcatcaaga  | gaaataccat  |
| 16201 | cctgcataac  | aacaagacgt  | atagaagcaa  | taacctgagc  | agaaaaagtt  | acaccacgct  |
| 16261 | ttatacactc  | agattcatca  | tacttaggat  | catccaccct  | acaacttata  | aactcaatag  |
| 16321 | tagccctacg  | caaaggatca  | tttattggaa  | agattgtatg  | aaagataact  | tcaagtcttt  |
| 16381 | cattaccctt  | attctgagga  | gtaaatgaat  | catacgattc  | tttttgaacc  | ttaaccaaat  |
| 16441 | ccaataaaga  | atctttttaa  | tcaatcgacc  | tagaataaga  | aactctagga  | acaaaagcac  |
| 16501 | cagaagcgta  | catataagaa  | gaatcaacca  | ttaaaaatac  | ccaaactaat  | taaaagagct  |
| 16561 | atatcaatat  | aaaattaata  | cattaaatat  | tattcaagct  | ccacttttagt | tgctcctgct  |
| 16621 | tcaataagtt  | tttgcttgat  | tttttctgct  | tcgtcttttag | gaacattagc  | agtcaaactc  |
| 16681 | ttaggtaaag  | attcaaccaa  | ctcttttgc   | tctttttaa   | ccaatgtaga  | attaacctct  |
| 16741 | ctcacagctt  | taataactcc  | tattttttta  | ctcgcacaa   | tttctttta   | cacaacttta  |
| 16801 | tattcaactt  | tctcttgagc  | agcaggagca  | gcagcattat  | cgccaacagg  | cgccccagca  |
| 16861 | ccaacagctc  | caccaagaaa  | agaaccagca  | ggcaacccta  | ttttctcttc  | tagaactttt  |
| 16921 | acaagttcag  | aagcctctaa  | tagattttaa  | gataatat    | tatcaaccaa  | atcacttggt  |
| 16981 | acattactca  | taattaccac  | cttacttaac  | aataaaat    | tttttttagaa | ctataataat  |
| 17041 | ccaaaactct  | cataagcctc  | atagaagatg  | aattaataga  | caacgccaat  | cgagcaggaa  |



```

/collection_date="2018-11"
/metagenome_source="insect metagenome"
/note="metagenomic"
gene <1..1552
/locus_tag="wEsol_01467"
CDS <1..1552
/locus_tag="wEsol_01467"
/codon_start=1
/transl_table=11
/fullproduct="qcoverage 100 , hcoverage 97.3584905660377
, similarity 100 , identity 100 , evaluate 0.0 , alnlength
516 , Bacteria , Proteobacteria , AGK87071.1 secretion
protein [Wolbachia endosymbiont of Ceratosolen solmsi]"
/cog="AcrA COG0845 372 Membrane-fusion protein"
/pfam="HlyD_2 HlyD Biotin_lipoyl_2 Biotin_lipoyl
Pfam-B_12304 HlyD_3"
/tigr="TIGR01843 type_I_hlyD 422 type I secretion
membrane fusion protein, HlyD family"
/product="secretion protein"
/translation="LELTQIHSSIMISKLLKLSAGFSLTGLIGHGDNINMQGAKNKKK
KYPKFLDKTFALIDAVINFILKRESNNVNEVLKVTWGPLFFGLVVILIFFGIGGIWSA
IAPIDGAVHASGEVIVSSNRKIVQHLGGGIISKILVKEGQAVKKDEPLVLLSDVNEKA
NLSIIKEKLLSFLATEARLLAIRVDLDTLEFPDEVKKLSHDELVNKAIAKNQVKLFNSQ
RKSILGKTDILQQRIKQLNDELAGLNFQLNAAHKQYDLITEELETQRQLLD SGHISKP
HILALEKQFAEIEGRVGHYRSAISQVQQKIGENELEIINVRNDSQERANAELKEVSTS
IADLKERLMVAEDSLARTIIKSPQDGIVTDIRYHTEGGVIQSGVPIMSVVPSDDDLII
DAKIQTRNIEEILSAQKKDSNIVSIDGLEGLKVKVRLSAYSARRLSLINGIVSNISPD
ALDDPRLGRYYSVRVVIPKPELAQFKNVLYLPGMPAEVYIVTQSRTLLSFLFTPIIAT
VDRSFIER"
/besthit="qcoverage 100 , hcoverage 97.3584905660377 ,
similarity 100 , identity 100 , evaluate 0.0 , alnlength
516 , Bacteria , Proteobacteria , AGK87071.1 secretion
protein [Wolbachia endosymbiont of Ceratosolen solmsi]"
gene 1695..1979
/locus_tag="wEsol_01468"
CDS 1695..1979
/locus_tag="wEsol_01468"
/codon_start=1
/transl_table=11
/fullproduct="qcoverage 100 , hcoverage 100 , similarity
100 , identity 100 , evaluate 9.86e-56 , alnlength 94 ,
Bacteria , Proteobacteria , WP_039964423.1 transposase
[Wolbachia endosymbiont of Drosophila simulans]"
/cog="COG2963 COG2963 116 Transposase and inactivated
derivatives"
/pfam="HTH_Tnp_1 HTH_23 HTH_28 Pfam-B_9422"
/product="transposase"
/translation="MAREYTAEFKLEAVKLTNEQRKVGQPVAKVARDLGIRDSVLGKW
MKKYNEKKSAANAFPDVAPYDKERFDLQKELAKVTRERDILKKALASQKE"
/besthit="qcoverage 100 , hcoverage 100 , similarity 100
, identity 100 , evaluate 9.86e-56 , alnlength 94 ,
Bacteria , Proteobacteria , WP_039964423.1 transposase
[Wolbachia endosymbiont of Drosophila simulans]"
gene 2427..2588
/locus_tag="wEsol_01469"
CDS 2427..2588
/locus_tag="wEsol_01469"
/codon_start=1
/transl_table=11
/fullproduct="qcoverage 100 , hcoverage 100 , similarity

```

```

98.1 , identity 98.1 , evaluate 4.57e-27 , alnlength 53 ,
Bacteria , Proteobacteria , WP_153801315.1 MULTISPECIES:
hypothetical protein [unclassified Wolbachia]"
/cog="Tra5 COG2801 232 Transposase and inactivated
derivatives"
/pfam="rve"
/product="hypothetical protein"
/translation="MSSSINKQLVMDSLLMAVNRKRPKNLLHSDQGSQYTAQGYQY
LLAVKNIDE"
/besthit="qcoverage 100 , hcoverage 100 , similarity 98.1
, identity 98.1 , evaluate 4.57e-27 , alnlength 53 ,
Bacteria , Proteobacteria , WP_153801315.1 MULTISPECIES:
hypothetical protein [unclassified Wolbachia]"
gene 2581..2745
/locus_tag="wEsol_01470"
CDS 2581..2745
/locus_tag="wEsol_01470"
/codon_start=1
/transl_table=11
/fullproduct="qcoverage 100 , hcoverage 100 , similarity
100 , identity 100 , evaluate 2.14e-30 , alnlength 54 ,
Bacteria , Proteobacteria , WP_010082072.1 MULTISPECIES:
IS3 family transposase [Wolbachia]"
/cog="Tra5 COG2801 232 Transposase and inactivated
derivatives"
/pfam="rve_3 rve_2"
/product="IS3 family
transposase"
/translation="MSNKGCCYDNSVAESFFSSLKREILIDTSQHSAQQTRTAIFEYI
EIFYNKQRHY"
/besthit="qcoverage 100 , hcoverage 100 , similarity 100
, identity 100 , evaluate 2.14e-30 , alnlength 54 ,
Bacteria , Proteobacteria , WP_010082072.1 MULTISPECIES:
IS3 family transposase [Wolbachia]"
gene complement(3117..5846)
/locus_tag="wEsol_01471"
CDS complement(3117..5846)
/locus_tag="wEsol_01471"
/codon_start=1
/transl_table=11
/pfam="Pfam-B_2980 Ank_4 Ank_3 Ank Pfam-B_1714 Ank_4
Ank_2 Ank_5 Ank Ank_3 Ank_5 Ank Ank_4 Ank_3 Ank_2 Ank_5
Ank Ank_3 Ank_4 Ank_5 Ank Ank_3 Ank_2 Ank_4 Ank Ank_5
Ank_4 Ank_2 Ank_5 Ank Ank_4 Pfam-B_5362"
/fullproduct="qcoverage 100 , hcoverage 100 , similarity
100 , identity 100 , evaluate 0.0 , alnlength 909 ,
Bacteria , Proteobacteria , WP_174516928.1 ankyrin repeat
domain-containing protein [Wolbachia endosymbiont of
Cardiocondyla obscurior]"
/translation="MIHYKWLEILSAINSDNDLNRDNIIEKIKEKLKAIDPTTYKEWK
NFNFNVNYWINNCAERCTLLHIAAGNGYIKAVKTLLEIGAKVNAVDLDRMTPHLAAE
GGHAEVVKILINADAKVNAVDLDRVTPLHLAAEEGHADEVVKILINADAKVNEVDRMKR
TPLHMAAKNGHIKTMDALLEKGAEINIIDKKGLTPLFLAAENGHKEAVCALMEKGVDF
LLGNKNRILKYLEKLTSDNLKQFRKEQRDDEYESLKYSLLCRDDHSLVDIVGGDIFN
SLMHIRLAGISGLTPSQRELNKELFSLQAYLSFSDEGDYNEHGYYIVRLRNFLQDNGD
NQDLEKVLNLRGESKLTVLHIISSIAGVEKEYDDSVALLLKAGANPNVKDDRGTPL
HYATGPNISIASLMEKGTNLNEQDNEGKTPLHICIASTDYNDLISSLLDSGARSIDCDKQ
GKTPLDIAIDNCNYYAEGYLLTEDHKRLQQELDCILGGVDKDNPSSLSKGLTVLEKFL
NERKGTQDLKRVLSLHNNKGKLRIFQYIRDVFHSDETCCKEAERLLLAAGIKDFKGLD
SEKHLLKSRTLWDNLILDQQAKLEVFLDEVGKAQNMNQLQVNVNEAIKSGIRFNFPHQ

```

```

GKLYGKMYEDKYNFMDCVMKRIKEISELEKNSKVASDIICKLVSKGAVWYVDSMYVL
NTLELEFEDHETNMIKAHGSCANLTLKFMEVVRGATNGKLDKMDNSTFYLEYSEDS
IIDVAKITDGARSLGLTQGKIEYGRDIVKIGKSEVEIITENGIRHYTNLADNSNIVLT
FSTSLGELEVNLYPDKQDKIIVEVSNKKEILEKFKNCKEELGENCSLGGYWVYDAIKQ
GYFERSGKLCQSFETISLSKKVSEGVKAAVKGLKCGDIVSSSSSNIFSPKAIM"
/product="ankyrin repeat domain-containing
protein"
/besthit="qcoverage 100 , hcoverage 100 , similarity 100
, identity 100 , evaluate 0.0 , alnlength 909 , Bacteria ,
Proteobacteria , WP_174516928.1 ankyrin repeat
domain-containing protein [Wolbachia endosymbiont of
Cardiocondyla obscurior]"
gene complement(6058..6906)
/locus_tag="wEsol_01472"
CDS complement(6058..6906)
/locus_tag="wEsol_01472"
/codon_start=1
/transl_table=11
/pfam="Ank_2 Ank_5 Ank_4 Pfam-B_10896 Ank Ank_3 Ank_2
Ank_5 Pfam-B_1714 Ank Ank_4 Ank_3 Ank_5 Ank Ank_3 Ank_2
Ank_4 Ank_5 Ank Ank_3 Ank_2 Ank_4 Ank_5 Ank Ank_3 Ank_4"
/fullproduct="qcoverage 100 , hcoverage 100 , similarity
100 , identity 100 , evaluate 6.09e-103 , alnlength 282 ,
Bacteria , Proteobacteria , WP_015589133.1 MULTISPECIES:
ankyrin repeat domain-containing protein [unclassified
Wolbachia]"
/translation="MNLSELQEILRAIIQDGVDESVIDRIENQLKEQDFDIIFSDMD
VKTTLLHVAASMDRLRIVEYLVGKKNVAIDLQDKDDHTPLHSAVRKNNFSIVEYLIKN
HADPNAKNNHGFTPLYFAAFKGYLDIVKHLVKNGATLQDKDGDTPLYAAASEGYLD
IVECLIKKGANPNMKNYRGTTPLHAAAKGGYLDIVKYLVENGADVDAVDVNKKTPSDI
VDEYSHPGVVEFLNKKRVASDANNNVPSQAARKRTKLDKVQEDNIELLITSISKLGRTG
GITNKM"
/product="ankyrin repeat
domain-containing protein"
/besthit="qcoverage 100 , hcoverage 100 , similarity 100
, identity 100 , evaluate 6.09e-103 , alnlength 282 ,
Bacteria , Proteobacteria , WP_015589133.1 MULTISPECIES:
ankyrin repeat domain-containing protein [unclassified
Wolbachia]"
gene 7722..8207
/locus_tag="wEsol_01473"
CDS 7722..8207
/locus_tag="wEsol_01473"
/codon_start=1
/transl_table=11
/pfam="Ank_5 Ank_4 Ank_2 Ank_3 Ank Ank_5 Ank Ank_3 Ank_4
Pfam-B_6927"
/fullproduct="qcoverage 100 , hcoverage 100 , similarity
100 , identity 100 , evaluate 9.87e-67 , alnlength 161 ,
Bacteria , Proteobacteria , WP_015589130.1 MULTISPECIES:
ankyrin repeat domain-containing protein [unclassified
Wolbachia]"
/translation="MTLNNDLLVSAAGAGRLSDVRELLEKGANIEARDSDGYTSLHR
AAEGGHLEIIRFLIDKGANIGAKNKDGGKPLDVANTSRQSEVVNFLGPKQSEYDRLLF
AAVESGNVSEVTNLLNIGASIEVKGVENAEFRLARYVKRIMEMSNYHNVHSEKNLSLK
G"
/product="ankyrin repeat
domain-containing protein"
/besthit="qcoverage 100 , hcoverage 100 , similarity 100
, identity 100 , evaluate 9.87e-67 , alnlength 161 ,

```

```

Bacteria , Proteobacteria , WP_015589130.1 MULTISPECIES:
ankyrin repeat domain-containing protein [unclassified
Wolbachia]"
gene      8235..8417
          /locus_tag="wEsol_01474"
CDS       8235..8417
          /locus_tag="wEsol_01474"
          /codon_start=1
          /transl_table=11
          /product="hypothetical protein"
          /translation="MQYFHRRYVLKVFTIVMSIYILLVIILAMIGIEGEYLLGGQGAK
          IVHVNGNLNLKVTTYI"
          /besthit="qcoverage 73.33333333333333 , hcoverage 100 ,
          similarity 97.7 , identity 95.5 , evalue 1.03e-17 ,
          alnlength 44 , Bacteria , Proteobacteria , CDR78713.1
          hypothetical protein WPAU_0321 [Wolbachia endosymbiont of
          Drosophila simulans wAu]"
gene      8433..8567
          /locus_tag="wEsol_01475"
CDS       8433..8567
          /locus_tag="wEsol_01475"
          /codon_start=1
          /transl_table=11
          /product="hypothetical protein"
          /translation="MSIYILLVIILAMIGIEGEYLLGGQGAKIVHVNGNLNLKVTTYI
          "
          /besthit="qcoverage 63.6363636363636 , hcoverage
          63.6363636363636 , similarity 96.4 , identity 92.9 ,
          evalue 1.48e-06 , alnlength 28 , Bacteria ,
          Proteobacteria , CDR78713.1 hypothetical protein
          WPAU_0321 [Wolbachia endosymbiont of Drosophila simulans
          wAu]"
gene      8796..9722
          /locus_tag="wEsol_01476"
CDS       8796..9722
          /locus_tag="wEsol_01476"
          /codon_start=1
          /transl_table=11
          /fullproduct="qcoverage 100 , hcoverage 100 , similarity
          100 , identity 100 , evalue 2.36e-213 , alnlength 308 ,
          Bacteria , Proteobacteria , WP_015589129.1 MULTISPECIES:
          hypothetical protein [unclassified Wolbachia]"
          /translation="MEARGKDSPCQWKIEDCGSTRKKRDVQYSITKEAKCDLSYDNAS
          DNSSQSDEIGYNKIGATSGASKPSSWIDAVKGVFQFISSPLRAALPSFSSENSSRSGT
          AGSSSNHSDTVRNPNIQYTSQFSREVCASNNASLMFFLLQAFLDKKCPLPKFSDVNPV
          KALFYTSDIIKSFKVLEKQAESKGGIKMHRDLINFEKLFKINEKIRSGEFNEISGI
          LKSYAEALPGREPGDPGRLLSPKKFDKFMAEFNRRIDPVINQLMQMLSRLEVSDVKE
          QQISLEPKSYLNNTSVQCHLTQARGQGKVLIP"
          /product="hypothetical protein"
          /besthit="qcoverage 100 , hcoverage 100 , similarity 100
          , identity 100 , evalue 2.36e-213 , alnlength 308 ,
          Bacteria , Proteobacteria , WP_015589129.1 MULTISPECIES:
          hypothetical protein [unclassified Wolbachia]"
gene      complement(9711..10622)
          /locus_tag="wEsol_01477"
CDS       complement(9711..10622)
          /locus_tag="wEsol_01477"
          /codon_start=1
          /transl_table=11
          /fullproduct="qcoverage 100 , hcoverage 100 , similarity

```

97.7 , identity 97.7 , evalue 2.24e-204 , alnlength 303 ,  
 Bacteria , Proteobacteria , WP\_015589128.1 MULTISPECIES:  
 Rpn family recombination-promoting nuclease/putative  
 transposase [Wolbachia]"  
 /pfam="PDDEXK\_2 Pfam-B\_9730 Pfam-B\_12519"  
 /tigr="TIGR01784 T\_den\_put\_tspse 273 conserved  
 hypothetical protein"  
 /product="Rpn family  
 recombination-promoting nuclease/putative transposase"  
 /translation="MTFSKFLDPKNDVSFKRIFGTEKNRDILIHFLNDILGFTGKNEI  
 KDIEFLSTIQDPDIAAKQSIQVLCRDSTGAQYICEMQVAKTKGFEEKRAQYAAKAY  
 SRQADKGDQYHNLKEIIFIAIADCVLFPNKSEYKSKHTIRDEDTNEHDLKDFYFIFIE  
 LPKFPPKNKEDQLENIVEKWVYFFRYADETSEEELEKIIGSDVVIKKAYEELNRFNWSE  
 KEFIAEQEIKRILDEQAVLAQKLDDETEKGREEGRQEGILIGHEKGRKAIEVAKN  
 SLKAGVSIQVIAQITGLSIDEIQKLRN"  
 /besthit="qcoverage 100 , hcoverage 100 , similarity 97.7  
 , identity 97.7 , evalue 2.24e-204 , alnlength 303 ,  
 Bacteria , Proteobacteria , WP\_015589128.1 MULTISPECIES:  
 Rpn family recombination-promoting nuclease/putative  
 transposase [Wolbachia]"

# ORIGIN

```

1 tcttgagtta acacaaattc acagtagtat tatgataagt aagttaaaaa agcttagcgc
61 tggattttct ttgacaggct tgattggcca tggtgataat ataaatatgc aaggagcaaa
121 aaataaaaag aagaagtacc caaaatTTTT ggataagacg tttgcattga ttgatgcagt
181 gataaatttt attttaaaac gcgaaagtaa taacgtaaat gaagtcctga aagtaacgtg
241 gggaccacta ttttttggtc tggtagtaat actcatcttt tttgggatag gtggtatttg
301 gtcggctata gctccaattg acggtgcggt gcatgcaagt ggagaagtta ttgtatcttc
361 aaatagaaaa atagttcaac acttgggtgg aggaataata agcaaaattt tagtaaaaga
421 ggggtcaagca gttaaaaaag atgagcctct agttttggtg agtgatgtta acgagaaggc
481 gaattttaagt atcatcaaag agaagctctt atcattttta gcaacagaag caaggcttct
541 tgcaatcaga gtagatttgg acacgctcga gtttcctgat gaggttaaaa aattatctca
601 cgatgaactt gtaaataaag cgataaagaa tcaagtaaag ttgttcaact ctcagagaaa
661 gagcatattg ggaaaaacag acatactgca acaacgtata aagcagttta atgatgaatt
721 agcgggggcta aactttcaac taaatgcagc tcataagcaa tatgacttga taactgagga
781 gttggaaaca aaaagacaat tacttgatag tggccatata agcaaaccac acatttttagc
841 tttagaaaag cagtttgctg aaattgaagg cagagttgga cattaccggt ctgcaatctc
901 tcaagtgcag caaaaaattg gagagaacga attagaaatt ataaacgtga gaaatgattc
961 tcaagaaaga gcaaacgctg aacttaagga agttagtacg tctattgcag acttgaaaga
1021 gagactgatg gttgctgaag attcattagc acgtacaata attaaatcgc ctcaagatgg
1081 gatagtcaca gatataagat accatactga aggtggtggt atacaatctg gagttccgat
1141 catgagcgta gtgccatcgg atgatgacct aataatagat gctaaaattc agaccagaaa
1201 catagaagag atactgtcag cacaaaagaa agatagcaac atagtctcta ttgatgggct
1261 agaagggcta aagggttaaag ttcgtttaag tgcttacagt gcacgtcgtt taagtttaat
1321 taatgggtata gtaagcaata tttctcccga tgcccttgat gatccaaggc tagggcggtta
1381 ttattcagta cgtgtagtga taccaaaacc agagcttgct cagtttaaaa acgtatacct
1441 ataccctggt atgccagcag aagtgtacat agttactcaa tctcgtactc ttttatcatt
1501 cttgttttacg cctataattg caacagtcga taggtctttt atagaaagggt agctcactcg
1561 ttaaagtagt agtgaaagtg ccgtaataaa atttaggtac ataattagac aataggcttc
1621 ttgaccttac ccagaaaaag tggagagaaa gaaaggagtt tttttgggta aaataaaatt
1681 ttggaggatt agaaatggca agagaatata cggcagaatt caaattggaa gctgttaagc
1741 tgacaaatga acaaagaaaag gtaggtcaac cagttgcaaa agtagcaaga gatctaggaa
1801 taagggatag tgtattagga aaatggatga agaaatataa cgaaaaaaag tcagcggcaa
1861 atgcattttcc agatgtagca ccttatgaca aagagagatt tgatttacag aaagagttag
1921 caaaagtaac aagagaaaaga gacattttta aaaaagccct ggccagtcaa aaagagtaaa
1981 atatttttttc ataaaagagc atagtaaaca ctataaagtg caggaattat gtagggtttt
2041 ctgctagtgg ctactataag tggactacaa ggaaaataag cagtagagaa tcagcaaata
2101 aagagttatt agcagatatt caaaaaatat atcaagcttc taaatgtaga tatggagctc
2161 ctaaaattca tgctgaatta aaggcttttg gtaaaagttg caacttaaaa acagtgcaaa
2221 gtattatgca gaaaaatggt attcaggcta tattgagaag aaaatttaaa attaagaaac
2281 aacaaacgga cagtagctcc caatatatta gaccaaactt ttattgtcga tcaaccaaat

```

|      |             |             |             |            |              |             |
|------|-------------|-------------|-------------|------------|--------------|-------------|
| 2341 | aaagtatggg  | attacttata  | taaaaaccaa  | agaaggatgg | ctatatatttgg | caacaataat  |
| 2401 | cgatctatat  | tcacgcatgg  | tagttaatga  | gcagttcaat | aaataaacaa   | ttgggttatgg |
| 2461 | actcttttatt | aatggccggt  | aacaagcgta  | aacctgccaa | aaatctacta   | ttacatagtg  |
| 2521 | atcaagggttc | acaatatact  | gcgcaagggt  | atcaatatct | cttagctgta   | aagaatatag  |
| 2581 | atgagtaata  | aaggctgttg  | ttacgacaat  | tctgttgtag | aaagcttctt   | tagctcattg  |
| 2641 | aaaagagaaa  | tacttattga  | tacttcacaa  | cactctgctc | aacaaactag   | aactgcaata  |
| 2701 | tttgaataca  | tagaaatttt  | ttataacaaa  | caacgtcact | attaactatt   | gcattccaga  |
| 2761 | acaatttgat  | gcattcattct | ttttgtaaaa  | aacattccaa | actttctctc   | cactttttct  |
| 2821 | gggtaagctc  | aataccttta  | agcccaacac  | caagctcgag | aaagtagaaa   | gtgtggagca  |
| 2881 | gcctattcgag | tcttctttga  | atctaacatg  | aaaggctatg | ctcaaaaaac   | tataagcgctc |
| 2941 | caagtaattt  | tttaaataag  | ataactcctt  | tagaatatct | cttaagctat   | taacttaaca  |
| 3001 | tcaccatagg  | atttaaaaca  | ttcccaaaaa  | aatgttaaag | ctatttttagt  | aaaatactca  |
| 3061 | aaacttgacc  | ctaagcaact  | ttgagttcat  | gctcctggta | ctcttgcttt   | atcttcctac  |
| 3121 | ataatcgctt  | ttggagaaaa  | tatattactg  | gatgaagaac | tcactatatc   | accacacttt  |
| 3181 | aaaccttttta | ccgctgcttt  | gactccttct  | gagacttttt | tagatagact   | aattgtttca  |
| 3241 | aaagattgac  | aaagttttcc  | agacctttca  | aaatatccct | gtttaatagc   | atcgtagacc  |
| 3301 | caatatccac  | caagcgagca  | attctcacct  | aattcttctt | tacaattttt   | gaacttttcc  |
| 3361 | agtatttcct  | ttttgttact  | aacttctact  | attattttat | cttgcttgctc  | agggtagaaa  |
| 3421 | ttaacttcta  | attctcctaa  | actagtagag  | aaagttaaca | ctatattact   | attgtctgca  |
| 3481 | agattagtgt  | aatgccttat  | gccattttcc  | gttataaatt | ctacctcact   | tttaccgatc  |
| 3541 | tttactatat  | ctcttccgta  | ttctattttt  | ccttgagtta | accctaagct   | ccttgcccca  |
| 3601 | tctgttatct  | ttgcgacatc  | tattatgcta  | tcctctgaat | actctaagta   | gaaagtagag  |
| 3661 | ttgtccattt  | ttgcatcttt  | taacttacca  | ttagttgcac | ctctaacaac   | ttccataaac  |
| 3721 | ttgagagtaa  | gatttgcaca  | acttccatga  | gcttttatca | tattagtttc   | atgatcttca  |
| 3781 | aattctaatt  | ccagtgtatt  | gagcacatac  | atactatcta | caacatacca   | caccgctcct  |
| 3841 | tttgatacta  | atttacatat  | tatatcacta  | gcaaccttgg | agttcttttc   | taattcacta  |
| 3901 | atctcttttta | ttcttttcat  | cacacaatcc  | ataaagttaa | acttatcttc   | atacatcttt  |
| 3961 | ccatatagct  | ttccttgatg  | aggaaaatta  | aaccttattc | cagactttat   | agcttcgttt  |
| 4021 | acaacttggt  | ctaattgatt  | catgttttgc  | gctttaccta | cttcatctaa   | aaacacttct  |
| 4081 | aactttgcct  | gctgggtctag | tattaaatta  | tcccatagag | tcctagattt   | aagcagatgc  |
| 4141 | ttttcactat  | ctaacccttt  | gaaatctttt  | attcctgctg | ccagcaacaa   | tctttctgct  |
| 4201 | tctttacaa   | aagtttcatc  | actatgaaaa  | acatctctga | tatattgaaa   | gattcgtaac  |
| 4261 | ttccctttat  | tgttatgaag  | gcttaaaact  | ctctttaagt | cttgagtacc   | cttgcgttca  |
| 4321 | ttcaaaaaact | tttctaatac  | agtaagacct  | ttacttagag | aagaagggtt   | atctttgtca  |
| 4381 | acaccaccaa  | gaatacagtc  | taattcttgc  | tgcaaccttt | tgtgatcctc   | agttaaaaga  |
| 4441 | taaccttcag  | catagtagtt  | acaattatca  | attgctatgt | ctagtggggt   | ctttccttgt  |
| 4501 | ttatcacata  | tatcagatct  | agctccacta  | tccagaagtg | aagagatgag   | atcattgtaa  |
| 4561 | tcagtgcctg  | caataacaatg | taagggtgtt  | tttccttcat | tatcctgctc   | attaagatta  |
| 4621 | gttccttttt  | ccataagaga  | agctatacta  | ttaggtccag | tagcataatg   | caagggtgtc  |
| 4681 | tttcctctat  | catcctttac  | attagggtta  | gctcctgcct | tcaaaaagtaa  | agctacagaa  |
| 4741 | tcgtcatatt  | ctttttctac  | cccagctata  | cttgatatta | tgtgtaatac   | tgttaattta  |
| 4801 | gattctcctc  | ttctaagatt  | aaggactttt  | tctagatctt | gattatctcc   | attgtcttgt  |
| 4861 | aaaaaatttc  | taagtctcac  | aatataacca  | tgttcattat | aatcaccttc   | atcactaaaa  |
| 4921 | gacaggatg   | cttgaggat   | actgaataat  | tctttattta | attctctttg   | acttgggtgt  |
| 4981 | agaccagata  | tgccagcaag  | ccgtatatgc  | attaagctat | tgaatatatc   | tcctccaaca  |
| 5041 | atatcaacta  | aagaatgatc  | atcacgacat  | agcaatgagt | atttaagtga   | ttcatattca  |
| 5101 | tcatcccttt  | gctcttttgc  | aaactgtttt  | aaattatcac | ttttgggttag  | tttttctaag  |
| 5161 | tacttttagga | ttctattttt  | atttcccaat  | aaaaaatcta | ctcccttttc   | cattaaagca  |
| 5221 | catactgctt  | ctttatgacc  | attttcggca  | gcaagaaata | atggcgtaaa   | ccccttttta  |
| 5281 | tctattatat  | taattttctgc | acctttttct  | aatagagcat | ccattgtctt   | tatatgacca  |
| 5341 | tttttagcag  | ccatatgcaa  | tggagtacgc  | ttcattctat | ccacttcatt   | aacctttgca  |
| 5401 | tctgcgttta  | ttaaagattt  | tactacctct  | gcgtgacctt | cttcggcagc   | taagtgtaac  |
| 5461 | ggagtcaccc  | tgtctagatc  | tactgcattg  | acctttgcat | ctgcgtttat   | taagattttt  |
| 5521 | actacctctg  | catgacctcc  | ttcggcagct  | aagtgtaacg | gagtcacctc   | atctagatct  |
| 5581 | actgcattga  | cctttgcacc  | tattttccaa  | agagtcttca | ctgcctttat   | ataaccattt  |
| 5641 | ccagcagcga  | tatgcaatag  | agtacatctc  | tctgcgcaat | tgtttatcca   | ataattcaca  |
| 5701 | ttaaaattaa  | aattttttcca | ctcttttatac | gtgggttgat | ctattgcttt   | taacttctct  |
| 5761 | tttatttttt  | caattatgtt  | atccctattt  | aatcatttgt | cagaattttat  | tgcacttaat  |
| 5821 | atttctaacc  | acttataatg  | tatcatattt  | ctaccctatg | ctattcaatt   | gttttatattt |
| 5881 | agctcttacc  | actacaccta  | gcagcacttg  | tctcacaaac | acattttttt   | agctcttcca  |

|      |             |             |             |             |             |             |
|------|-------------|-------------|-------------|-------------|-------------|-------------|
| 5941 | tattttaattt | gtcactaaac  | acaattagct  | atacaaaaac  | ccatctactg  | tcaagatgta  |
| 6001 | tcagtggatg  | ttgcctactt  | acgttggact  | cgcttagcct  | attactaggc  | tttaatgcta  |
| 6061 | catcttatta  | gtgatacctc  | cagtcgcgacc | taattttgaa  | atggatgtta  | taagtaactc  |
| 6121 | aatattatct  | tcttgcactt  | tatccagttt  | agttctttta  | gcagcctgtg  | aaggaacatt  |
| 6181 | attgtttgca  | tcagaagcaa  | cacgcttttt  | attaagaaac  | tcaactacac  | ctggatgact  |
| 6241 | atactcatca  | acgatatctg  | aaggagtttt  | tttgtttaaca | tccactgcat  | caacgtcagc  |
| 6301 | tccattttct  | acaagatat   | taactatgtc  | taagtaacca  | ccttttagcag | cagcatgtaa  |
| 6361 | gggggtagtg  | ccacgatagt  | tcttcatatt  | cggattagct  | ccttttttta  | taagacattc  |
| 6421 | aactatatct  | aagtaaccct  | ctgaagcagc  | agcatataaa  | ggagtatcac  | catccttgtc  |
| 6481 | ttgtagatca  | agagtagctc  | cgtttttttac | aagatgttta  | actatgtcta  | agtaaccctt  |
| 6541 | aaaggcagca  | aagtacaaag  | gagtaaagcc  | gtgattgttc  | tttgcattag  | gatcagcatg  |
| 6601 | atTTTTtata  | agatattcaa  | ctatactgaa  | attattcttg  | cgaacagcac  | tgtgtagggg  |
| 6661 | agtatgatca  | tccttgtctt  | gtaaatcaat  | agcaacattt  | tttttaccta  | caagatattc  |
| 6721 | aactattctt  | aagcgatcca  | tggaagcagc  | tacatgcagt  | aaagtagtct  | ttacatccat  |
| 6781 | atcggaata   | attatgtcaa  | aatcttgttc  | ttttagctga  | ttttctattc  | tatcaataac  |
| 6841 | attactctca  | tctacaccat  | cttgtattat  | tgctcttaat  | atctcttgca  | actcacttaa  |
| 6901 | attcataatt  | ttaccttagc  | ttaaaaccgc  | tttaatcatt  | atatgcctga  | tacaaaagtc  |
| 6961 | aagaatttta  | tatgtcttcc  | tgaaaattac  | gagcgattgt  | tttagttgct  | ctgcttgatc  |
| 7021 | ggtagaagga  | gcataattgt  | gcaattcaat  | agaaacatgc  | ccttcttcag  | catcacaaaa  |
| 7081 | tttttaatta  | ttgactttcc  | ccaaaaacgc  | aaaaaagtaa  | gtatatttgt  | gagaataatt  |
| 7141 | taaataaaaag | cggcggtata  | aaaataaaaa  | cgtaaaattg  | ttgcaataaa  | gttaggtgta  |
| 7201 | ttagtttata  | tctaaatatg  | gcaaaagtag  | gctaatatag  | ctgggttttac | ggtatagtaa  |
| 7261 | aattattata  | aagaaaagtt  | caaacggttt  | aagcggtagt  | ccaatccatc  | ccaaaacaaa  |
| 7321 | ctcttctcac  | gacccttgg   | tttgaatgct  | ggaaatgggt  | gtgttattta  | ggttcttagt  |
| 7381 | aatatttaaat | attaaattaa  | tagtaattca  | ttaaaaattt  | tcatcaaaaa  | ttatttcaaa  |
| 7441 | aaaatttttaa | attaggggtt  | gacaagtttt  | aaaagtggag  | tactattcct  | gaaatacatt  |
| 7501 | agattactaa  | ttttttatgg  | tatgtaagtg  | tgtgatggct  | aaggtaattt  | tacttttggt  |
| 7561 | agcgggctat  | gttatgtgag  | ggcattccag  | aattcttgtt  | tgaggggaaga | tggctctttc  |
| 7621 | tgtgttgctt  | gaggaaagaa  | aaaagctcag  | ggtaagagt   | gcttgttata  | gtgtgattgc  |
| 7681 | ttagttaagt  | taggtaagt   | tttataaatg  | tggagggaca  | aatgacttta  | aacaatgatg  |
| 7741 | atTTattagt  | tagtgctgca  | ggagcaggac  | gccttagtga  | cgttagagaa  | cttcttgaga  |
| 7801 | aaggggctaa  | tattgaagct  | agagatagt   | atgggttacac | atctttgcat  | agggctgctg  |
| 7861 | aaggagggtca | tttagagata  | attagatttc  | ttatagataa  | gggggctaac  | attggagcta  |
| 7921 | aaaataagga  | tgggtggaaaa | ccttttagatg | tagcaaatac  | ctctcgtcag  | tcagaagtag  |
| 7981 | taaactttttt | aggaccaaa   | caaagtga    | atgatagact  | tttatttgct  | gctgtagaaa  |
| 8041 | gtgggaatgt  | tagtgaagtt  | acaaatcttc  | tcaatatttg  | agctagtatt  | gaagttaaag  |
| 8101 | gtgtagaaaa  | tgcggagttt  | aggtttagccc | gttatgtaaa  | aagaattatg  | gagatgagta  |
| 8161 | attaccataa  | tgttcattcg  | gaaaaaaatc  | tgagcttgaa  | aggataaaa   | gagaattacc  |
| 8221 | agagtcagta  | aagaatgcag  | tattttcatc  | ggaggtatgt  | attaaaagtg  | tttactatag  |
| 8281 | taatgagtat  | ttatatcctg  | ctagtgatta  | tcttagccat  | gatagggata  | gaaggagagt  |
| 8341 | atttacttgg  | aggccagggg  | gcaaagatag  | ttcatgtcaa  | tggaaatttg  | aacctgaagg  |
| 8401 | taacaacata  | tatatataaaa | gcacttattt  | taatgagtat  | ttatatcctg  | ctagtgatta  |
| 8461 | tcttagccat  | gatagggata  | gaaggagagt  | atttacttgg  | aggccagggg  | gcaaagatag  |
| 8521 | ttcatgtcaa  | tggaaatttg  | aacctgaagg  | taacaacata  | tatatataaaa | gcacttattt  |
| 8581 | taatgagtat  | ttatatcctg  | ctagtgatta  | tcttagccat  | gatagggata  | gaaggagagt  |
| 8641 | atttacttgg  | aggccagggg  | caaagatagt  | ccatgtcaat  | ggaaatttga  | acctgaaggt  |
| 8701 | aacaacatat  | atataaaaa   | cacttatttt  | aatgagtatt  | tatatcctgc  | tagtgattat  |
| 8761 | cttagccatg  | atagggatag  | aaggagagta  | tttacttgga  | ggccaggggc  | aaagatagtc  |
| 8821 | catgtcaatg  | gaaaattgag  | gattgtggat  | ctactcgcaa  | gaagcgtgat  | gtacaatata  |
| 8881 | gtattacaaa  | agaagctaa   | tgtgatctat  | cttatgataa  | tgcacagac   | aattcatcgc  |
| 8941 | aaagtgacga  | aataggctat  | aacaaaatag  | gagctacaag  | cggagcaagt  | aagccgtctt  |
| 9001 | catggataga  | tgtgtttaa   | ggtgtttttc  | agtttatctc  | ttccccctta  | agggctgcgt  |
| 9061 | tgccttcatt  | ttcagaaaa   | agctctagcc  | gttctggtac  | agcaggaagt  | agctccaatc  |
| 9121 | attctgatac  | agtaagaaac  | ccaaatatcc  | aatatactag  | ccaatttagt  | cgtgaagttt  |
| 9181 | gtgcgagtaa  | taatgctagc  | ttgatgtttt  | tcttgttaca  | agctttttcta | gataaaaaagt |
| 9241 | gtcctcttcc  | taagttttct  | gatgttaatc  | ctgtaaaggc  | tctttttttac | acatcggata  |
| 9301 | ttataaaagtc | gttcaaggaa  | gtattagaga  | agcaagctga  | atcgaaaggt  | ggtataaaaa  |
| 9361 | tgcaccgctt  | agatattaat  | tttgagaaat  | tatttgagaa  | gattaatgaa  | aaaattagga  |
| 9421 | gtggtgaatt  | taatgaaatt  | tcagggattt  | taaaatcata  | cgcagaggaa  | gcattgcctg  |
| 9481 | gtagagaacc  | cggagatccc  | ggtagattaa  | gtccgaaaaa  | gtttgataag  | tttatggctg  |



```

/country="USA: Cowling Arboretum, Carleton College,
Northfield, MN"
/lat_lon="44.48 N 93.13 W"
/altitude="280 m"
/collection_date="2018-11"
/metagenome_source="insect metagenome"
/note="metagenomic"
gene 228..2888
/locus_tag="wEsol_01478"
CDS 228..2888
/locus_tag="wEsol_01478"
/codon_start=1
/transl_table=11
/fullproduct="qcoverage 100 , hcoverage 100 , similarity
100 , identity 100 , evaluate 0.0 , alnlength 886 ,
Bacteria , Proteobacteria , QDH19019.1 preprotein
translocase subunit SecA [Wolbachia endosymbiont of
Carposina sasakii]"
/cog="SecA COG0653 822 Preprotein translocase subunit
SecA (ATPase, RNA helicase)"
/pfam="SecA_DEAD DEAD SecA_PP_bind SecA_SW SEC-C"
/tigr="TIGR00963 secA 787 preprotein translocase, SecA
subunit"
/product="preprotein translocase subunit SecA"
/translation="MLDSPLILTAILIFFIFITLSFFFIRKIFGSTNKKIISFRKIVQ
QINALETQMQLSDEELAGKTEEFNRELKNGKTLNDLLVPAFAVVREASRRFLNMRHF
DVQLIGGMVLHNGMISEMKTGEGKTLVATLAAYLNSLEGKGVHVVTVDYLAKRDTEW
MSKLYNSLGVSVAFITNNLTDEERKEAYSADIVYSTNNELAFDYLRDNMFKSQEDMVQ
RGFHYGIVDEVDSILIDEARTPLIISGPVEENNQIYKHINKIVTKLVDS DYEVDEKGR
TVFLTEDGISRVEELLRSYNLIPENSSLYD TDSMIMTHYIDQALRAHKLFTADKDYIV
KDGKVVIIIDEFTGRMMEGRRYS DGLHQALEAKENLEIQHENQTLASVTFQNYFRMYNK
LSGMTGTAATEAEFSDIYRLNVVKIPTNVSVKRV DIDDEIYGTGKEKFNAVLKFIEE
CHKRLQPVLVGTVSIENSEKLSALLQSHSLKHSVLNARYHEQEAYIIAQAGVPGSVTI
ATNMAGRGTDIQLGGNAEMIAKVELKKIKNADEREKKYQEIVERVKKDKEIAIKAGGL
CVVGTERHESRRIDDQLRGRSGRQGD PGLSKFFLSLEDDL MRIFGSDRMR SFLQKVGL
KNNEAIHHPWINKALEKAQKKVEARNYDVRKSL LKFDDVINNRKVIFKQRNNILGNE
INDLLEVYSEVNESVIEGIVQSGYYEDYIEDIVKEFHTRYGITL DKEDLAKFLNKQEV
LDYINDKIQEFFTEKEKYFNSQHTTDLWNTIVKQMMIMTLDHLWREHLSVLES LRQSI
SLRAMGQK DPLNEFKREAF LMFESMLEKWKELTIHRLAHFKLADNQEIGNRLHSARNS
RLPKVSRNDK CPCNSGKKYKHCHGAVTVVN"
/besthit="qcoverage 100 , hcoverage 100 , similarity 100
, identity 100 , evaluate 0.0 , alnlength 886 , Bacteria ,
Proteobacteria , QDH19019.1 preprotein translocase
subunit SecA [Wolbachia endosymbiont of Carposina
sasakii]"
gene complement(2892..3821)
/locus_tag="wEsol_01479"
CDS complement(2892..3821)
/locus_tag="wEsol_01479"
/codon_start=1
/transl_table=11
/pfam="Pfam-B_1873 Ribosomal_S6 Ank_3 Ank_4 Ank_2 Ank
Ank_5 Pfam-B_10896 Ank Ank_4 Ank_3 Ank_5 Pfam-B_14646 Ank
Ank_4 Ank_3 Ank_2 Ank_5 Ank Ank_3 Ank_4 Ank Ank_3"
/fullproduct="qcoverage 100 , hcoverage 100 , similarity
100 , identity 100 , evaluate 4.43e-121 , alnlength 309 ,
Bacteria , Proteobacteria , WP_174516903.1 MULTISPECIES:
ankyrin repeat domain-containing protein [Wolbachia]"
/translation="MTLRLILQEVNSSPDLSKENLIDRIKDKLQQENQLIYDEWKKE
FDINYTFIVLKCNNLLLIAAENGYEKVVRYLTNGANVNVQDEWEKTS LHYSAQHGHQAQ

```

```

VEVLLLEEGADVNAQNEDKGTPLHYAAYS GHIEVVKHLIKKEADVNVVD RYGRSPLHY
AAENGYTQVVEVLLLEEGADVNAQDKDGRTP LYYAVYYTHGEHPRLNYQH PKVAKLLLN
YGADPSFIHRPKAITAGITVGILAAIVAPLALIYATALPALAIVVITVASALIVGGIS
YGVAYKSSEHSLNSKLSEVSCSNVDGNKQTVQP"
/product="ankyrin repeat
domain-containing protein"
/besthit="qcoverage 100 , hcoverage 100 , similarity 100
, identity 100 , evalue 4.43e-121 , alnlength 309 ,
Bacteria , Proteobacteria , WP_174516903.1 MULTISPECIES:
ankyrin repeat domain-containing protein [Wolbachia]"
gene complement(4158..4799)
/locus_tag="wEsol_01480"
CDS complement(4158..4799)
/locus_tag="wEsol_01480"
/codon_start=1
/transl_table=11
/fullproduct="qcoverage 100 , hcoverage 100 , similarity
100 , identity 100 , evalue 2.25e-150 , alnlength 213 ,
Bacteria , Proteobacteria , WP_015589064.1 MULTISPECIES:
fructose-6-phosphate aldolase [unclassified Wolbachia]"
/cog="MipB COG0176 239 Transaldolase"
/pfam="Transaldolase"
/tigr="TIGR00875 fsa_talC_mipB 213 fructose-6-phosphate
aldolase"
/product="
fructose-6-phosphate aldolase"
/translation="MEIFLDSVDLNEIKGLKEFIDGITTNP SLIAKSGRKDKYEDLVR
EICSIIKGPVSVEVVADSH EEMITEGLNLAKIADNVVIKLP LTHEGLISCKKLWTEHK
IPVNITLCFSPGQALLAAKVGACFISPFVGRLLDDISYDGLSLIEDICTIYSNYGFDTK
VLVASVRSPAHVIEAARFGADSITVPAKVLRQLINHPLTDQGLAIFEKDWGVK"
/besthit="qcoverage 100 , hcoverage 100 , similarity 100
, identity 100 , evalue 2.25e-150 , alnlength 213 ,
Bacteria , Proteobacteria , WP_015589064.1 MULTISPECIES:
fructose-6-phosphate aldolase [unclassified Wolbachia]"
gene complement(4839..5180)
/locus_tag="wEsol_01481"
CDS complement(4839..5180)
/locus_tag="wEsol_01481"
/codon_start=1
/transl_table=11
/pfam="Pfam-B_11632"
/fullproduct="qcoverage 100 , hcoverage 100 , similarity
100 , identity 100 , evalue 5.58e-73 , alnlength 113 ,
Bacteria , Proteobacteria , WP_041573517.1 MULTISPECIES:
hypothetical protein [unclassified Wolbachia]"
/translation="MNLITNSIKGFYSSVKSDL DWQAKRSLIRTLVKEVNIDLDKVDV
VFKIKELENPAQNGQNQKMVHCLRGLGTGMTSFFLVQITLMSQYLYSCVIGCLMFTTQ
EVHTVVSQAVG"
/product="hypothetical protein"
/besthit="qcoverage 100 , hcoverage 100 , similarity 100
, identity 100 , evalue 5.58e-73 , alnlength 113 ,
Bacteria , Proteobacteria , WP_041573517.1 MULTISPECIES:
hypothetical protein [unclassified Wolbachia]"
gene 5545..5829
/locus_tag="wEsol_01482"
CDS 5545..5829
/locus_tag="wEsol_01482"
/codon_start=1
/transl_table=11
/fullproduct="qcoverage 100 , hcoverage 100 , similarity

```

100 , identity 100 , evalue 1.40e-55 , alnlength 94 ,  
 Bacteria , Proteobacteria , WP\_038198869.1 MULTISPECIES:  
 transposase [Wolbachia]"  
 /cog="COG2963 COG2963 116 Transposase and inactivated  
 derivatives"  
 /pfam="HTH\_Tnp\_1 HTH\_23 HTH\_28 Pfam-B\_9422"  
 /product="transposase"  
 /translation="MAREYTAEFKLEAVKLANEQRKVGQPVAKVARDLGIRDSVLGKW  
 MKKYNEKKSAANAFPDVAPYDKERFDLQKELAKVTRERDILKKALASQKE"  
 /besthit="qcoverage 100 , hcoverage 100 , similarity 100  
 , identity 100 , evalue 1.40e-55 , alnlength 94 ,  
 Bacteria , Proteobacteria , WP\_038198869.1 MULTISPECIES:  
 transposase [Wolbachia]"

gene 6269..6433  
 /locus\_tag="wEsol\_01483"

CDS 6269..6433  
 /locus\_tag="wEsol\_01483"  
 /codon\_start=1  
 /transl\_table=11  
 /fullproduct="qcoverage 100 , hcoverage 100 , similarity  
 100 , identity 100 , evalue 2.06e-28 , alnlength 54 ,  
 Bacteria , Proteobacteria , WP\_167482801.1 hypothetical  
 protein [Wolbachia endosymbiont of Carposina sasakii]"  
 /cog="Tra5 COG2801 232 Transposase and inactivated  
 derivatives"  
 /pfam="rve"  
 /product="hypothetical protein"  
 /translation="MSSSINKQLVMDSLMDVNKRKPAKNLLHSDQGSQYTLQGYQY  
 LLSIKNIDES"  
 /besthit="qcoverage 100 , hcoverage 100 , similarity 100  
 , identity 100 , evalue 2.06e-28 , alnlength 54 ,  
 Bacteria , Proteobacteria , WP\_167482801.1 hypothetical  
 protein [Wolbachia endosymbiont of Carposina sasakii]"

gene 6423..6587  
 /locus\_tag="wEsol\_01484"

CDS 6423..6587  
 /locus\_tag="wEsol\_01484"  
 /codon\_start=1  
 /transl\_table=11  
 /fullproduct="qcoverage 100 , hcoverage 100 , similarity  
 100 , identity 100 , evalue 1.09e-32 , alnlength 54 ,  
 Bacteria , Proteobacteria , WP\_081600772.1 MULTISPECIES:  
 IS3 family transposase [Wolbachia]"  
 /cog="Tra5 COG2801 232 Transposase and inactivated  
 derivatives"  
 /pfam="rve\_3 rve\_2"  
 /product="IS3 family  
 transposase"  
 /translation="MSHKGCCYDNSVVESFFSSLKRELPIDTSRHSKQHIKTAIFEYI  
 EIFYNKQRHY"  
 /besthit="qcoverage 100 , hcoverage 100 , similarity 100  
 , identity 100 , evalue 1.09e-32 , alnlength 54 ,  
 Bacteria , Proteobacteria , WP\_081600772.1 MULTISPECIES:  
 IS3 family transposase [Wolbachia]"

# ORIGIN

```

1 acattcatac cctactaaac ctacgaataa cttctttcta taaaaaatta aagtcaccaa
61 gtgcctaaga taatgcaaca gattctttta cattgtaata acagtgccga acaggggtcaa
121 ttttgtttgc tgtcttaagc ataaagactc cccaaatcta atatgtaatt gctgtaggct
181 gcatttagta atataatctc atattaaata agactttact taagtttatg ctagattctc
241 cgctaatttt gacagccatt cttatatattt tcattttttac gttgtcattc ttttttataa

```

|      |             |             |             |             |             |             |
|------|-------------|-------------|-------------|-------------|-------------|-------------|
| 301  | gaaagatatt  | tgggtcaaca  | aataagaaga  | taataaaatc  | ctttaggaaa  | attgttcagc  |
| 361  | aaataaatgc  | attagaaaca  | gaaatgcaga  | gcttatctga  | tgaggagctt  | gctggtaaaa  |
| 421  | ctgaagaatt  | caatcgagaa  | ttgaaaaatg  | ggaaaacggt  | aaatgatctt  | ctcgtacctg  |
| 481  | catttgcagt  | tgtgcgtgaa  | gcctctcgaa  | gatttcttaa  | catgaggcac  | tttgatgttc  |
| 541  | aactgattgg  | tggaatggtg  | ctccacaatg  | gcatgatatc  | agaaatgaaa  | acaggagagg  |
| 601  | gaaagacact  | cgttgcaact  | ttagctgcat  | accttaattc  | tttagaaggg  | aaaggcgtgc  |
| 661  | acgtcgtaac  | tgttaacgat  | tatcttgcaa  | aacgagacac  | agagtggatg  | agcaaattat  |
| 721  | ataattctct  | tggggtttct  | gttgcgttta  | ttacgaataa  | cttgacagac  | gaagagagga  |
| 781  | aagaggctta  | cagtgcagat  | atcgtgtatt  | ccacaaataa  | cgagcttgcc  | tttgattacc  |
| 841  | tgcgagacaa  | tatgaaatth  | tctcaagaag  | acatggttca  | gagaggctth  | cactacggaa  |
| 901  | tagttgatga  | agtggactca  | atactcattg  | atgaagctcg  | cactccgctt  | attatttctg  |
| 961  | gcccggttga  | ggaaaacaat  | cagatatata  | agcatatcaa  | taaaatagta  | accaaattag  |
| 1021 | ttgactccga  | ttatgaagta  | gatgaaaaag  | gtagaacggt  | attcttgact  | gaagatggta  |
| 1081 | tttcacgagt  | ggaggaacta  | ctaaggatcat | acaatctcat  | tcctgaaaat  | tcctcgctct  |
| 1141 | atgatactga  | cagcatgata  | atgactcatt  | atatagacca  | agcattacgt  | gcacataagc  |
| 1201 | tgtttactgc  | tgataaagat  | tatatagtaa  | aggatggcaa  | ggtagtgatt  | attgatgaat  |
| 1261 | ttactgggcg  | tatgatggag  | ggcaggagat  | attccgatgg  | tcttcacagc  | gcacttgaag  |
| 1321 | cgaaggagaa  | tcttgaaatt  | cagcatgaaa  | accaaactth  | agcatcggtc  | acatttcaga  |
| 1381 | attactttcg  | tatgtacaat  | aaactttccg  | gaatgactgg  | aacagcagca  | acagaggcag  |
| 1441 | aagagtttag  | tgatatatac  | agattaaatg  | tagtaaaaaat | tccaaccaat  | gtatctgtaa  |
| 1501 | aaagagttga  | tattgatgat  | gaaatthtatg | gcacaggaaa  | agaaaaatth  | aatgctgtgt  |
| 1561 | taaagttcat  | agaagaatgc  | cataaacgcc  | ttcaaccggt  | ccttgctcggc | acggtaaagca |
| 1621 | tcgaaaactc  | tgagaagctt  | tctgcgctth  | tgcaaagcca  | ttctcttaag  | cattccgtat  |
| 1681 | taaacgctcg  | ttatcatgaa  | caagaggcgt  | acataatagc  | acaagctgga  | gtgccaggca  |
| 1741 | gtgtcaccat  | agcaactaac  | atggcaggac  | gtggaactga  | tattcagctt  | ggtggaaatg  |
| 1801 | ctgaaatgat  | tgcaaagggtg | gagctaaaga  | agataaaaaa  | tgctgatgaa  | agagaaaaaa  |
| 1861 | aataccaaga  | aatagttgaa  | agagtaaaaa  | aagataagga  | aattgctata  | aaagctgggtg |
| 1921 | gtttatgtgt  | ggtttgaacc  | gaaagacatg  | aaagcaggag  | aatagatgat  | caattacgcg  |
| 1981 | gccgttctgg  | tcgtcagggg  | gatcctggac  | tttctaagtt  | ctttttatcg  | ctcgaagatg  |
| 2041 | acctaattgag | aatatttggtc | tctgatagaa  | tgagaagttt  | tttacaaaaa  | gtagggctaa  |
| 2101 | agaataacga  | agctattcat  | catccatgga  | tcaataaggc  | actcgagaaa  | gcacaaaaga  |
| 2161 | aagttgaagc  | tagaaaactat | gacgtgcgga  | aatctctact  | taagtttgat  | gacgtaatca  |
| 2221 | acaaccaacg  | taaagttatt  | tttaagcaga  | gaaacaatat  | cttaggcaac  | gaaattaatg  |
| 2281 | atttacttga  | agtatatagc  | gaagtaaattg | agagcgtaat  | agaagggtata | gtccaaagtg  |
| 2341 | gctattatga  | ggattatatt  | gaagatatag  | tcaaagaatt  | ccatacaagg  | tatggaataa  |
| 2401 | cgcttgataa  | agaagattta  | gcaaagttth  | taaacaaaaca | agaagttttg  | gattatataa  |
| 2461 | atgataagat  | acaagaatth  | tttactgaga  | aagaaaaata  | tttcaacagt  | cagcacacta  |
| 2521 | cagatttgtg  | gaatacgcac  | gtgaagcaaa  | tgatgataat  | gacacttgat  | catttatgga  |
| 2581 | gggaacacct  | ttcagttcta  | gagagcctaa  | gacaaaagcat | aagcctacgt  | gccatggggc  |
| 2641 | agaaagatcc  | actgaatgaa  | tttaaacgcg  | aagcttttctt | gatgttttgag | tcaatgcttg  |
| 2701 | aaaaatggaa  | ggaactcacc  | attcaccgcc  | tagcgcactt  | taagttggca  | gataaccaag  |
| 2761 | agataggcaa  | taggtttacat | tctgctagaa  | atagcagact  | tcccaaagtc  | tcaagaaacg  |
| 2821 | acaagtgcct  | ttgtaattct  | ggaaagaagt  | acaaacactg  | ccacggcgcg  | gttactgtgg  |
| 2881 | tgaattaata  | attatggttg  | tacagtttgt  | ttatttccat  | caacattact  | gcagctaacc  |
| 2941 | tcacttagct  | tactgtttta  | tgaatgctct  | gatgacttat  | atgcaacccc  | ataggaatth  |
| 3001 | ccaccaacga  | tcagtgcaga  | tgccacagta  | attacaacta  | ttgctagtgc  | aggtaatgca  |
| 3061 | gtagcataaa  | tgagtgcata  | tggagcaaca  | atggcagcta  | atatacctac  | agtaattcct  |
| 3121 | gctgtttatag | cttttaggtct | atgaataaat  | gatggatctg  | caccataatt  | tagcagaagt  |
| 3181 | ttcgctactt  | ttggatgttg  | ataatthtagt | cttggatgtt  | caccatgagt  | gtaataaaca  |
| 3241 | gcataatata  | aaggagttct  | tccgtctthta | tcttgatgat  | taacgtctgc  | tccctcttct  |
| 3301 | agcaaaactt  | ctactacttg  | tgtgtatcca  | ttctcagcag  | cataatgtaa  | aggacttctt  |
| 3361 | ccatatctgt  | ccactacatt  | aacatctgcc  | tctttttthta | taagatgtth  | tactacttct  |
| 3421 | atatgaccac  | tataagcagc  | ataatgcaaa  | ggagtccctt  | tatcttcatt  | ttgtgcatta  |
| 3481 | acgtctgctc  | cttcttctag  | caaaacttct  | actacttggt  | catgcccacg  | ctgagcagaa  |
| 3541 | taatgtaagg  | aggthttttc  | ccattcatct  | tgtacattaa  | cattagctcc  | gttttttggt  |
| 3601 | aagtatctta  | ctactthttc  | atagccattth | tcagctgcta  | taagtaataa  | attgcacttg  |
| 3661 | agcactataa  | acgtgtaatt  | tatatcaaat  | tcgtthttth  | tccactcatc  | atatataagt  |
| 3721 | tgattthtct  | gctgcagctt  | atctthtaatt | ctatcaatta  | aattthtctt  | actcagatct  |
| 3781 | ggactactgt  | tgacttcttg  | tagtattaac  | cttaatgtca  | tttcttctct  | caagatataa  |
| 3841 | aattthtatta | tggcatatgg  | agtggattat  | gtcaatgaaa  | aactaagaaa  | ctggttcttc  |

```

3901 ttttttttcta tagcttttagg tttacctaca atttgaaaaa caacaaattc gtcattccgc
3961 tactcgtttag cgcctcggcg gtatgatgta gggaaacctt tcttgggtta gctataaagt
4021 taagattcga ccagggcagc cgcaataagg tagcaaacgc catcatgtct ttaggagagt
4081 ttgctaataga aggctcttaa gttgacgcca ttgcctgaac ggatacgcca atttttatgt
4141 tcattttgtaa ccgtttatta ttttacaccc cagtcttttt caaatattgc tagcccttgg
4201 tcagtaagtg ggtgattaat taattgtcta agtacttttg ctggcacagt aattgaatca
4261 gcaccaaacc ttgcagcttc tattacatgc gctgggcttc tctactgatc aacaagaact
4321 ttagtatcaa aaccgtaatt agaatatata gtacatatat cttctattag cgataagcca
4381 tcatagctta tatcatcaag gcgaccaaca aagggggaaa taaaacaagc accgacctta
4441 gcggcaagca gtgcttgctc aggagaaaaa cataatgtga tgtaaacagg tattttatgc
4501 tctgtccata actttttaca agaaattaat cttcatgtg taagaggtaa tttgatcaca
4561 acattatcag caatttttgc taaattcaga cttctgtgta tcatctcttc atggctatct
4621 gcaacaactt caacactaac aggccctttt ataatagagc atatttcacg cactaaatcc
4681 tcgtatttat ctttacgccc ggactttgct attaaagaag gattagtgtg tatgccgtca
4741 atgaactcct ttagtccttt aatttcattt aaatcaacgc tatcaagaaa aatttccatg
4801 ttaatctcct ataaaaaaaa tacccttgca aaatcttgct atcctaccgc ttgacttaca
4861 accgtatgaa cttcctgcgt tgtaaacatc aaacagccga taacacaact gtacaaatat
4921 tgagacataa gagtaatttg taccaagaaa aaagatgtca tcccagtgcc cagaccctt
4981 agacaatgta ccatcttttg attttgtcca ttctgggagg ggttttcaag ttctttgatc
5041 ttaaatacta catctacttt atcaagatca atgttgactt cttttactaa tgtcctaata
5101 agactacgtt tggcttgcca atctaggtcc gatttaacac tagaataaaa gccctttatg
5161 ctattttgtaa taagattcat tttctgcctt attccctttt acctttttct tctctccttt
5221 aatctctttt aaacgttcct tcattttttt tattgcctgc ttaaagtctt ccttacttat
5281 agttagtgca tactttgttg ccgtaaaaac ttctggtacc caaacaattg taataagtat
5341 acacaatcct tgtcaactat tttcggcact ggtatataaa tccaattctc ttcactgtga
5401 ctataaatag agtgagttcg ccggctgttg cttttttttg gtttgacttc tagcattact
5461 gggcccgccct ttgaccttac ccagaaaaag tggagagaaa gaaaggagtt ttttcgggta
5521 aaataaaaatt ttggaggatt agaaatggca agagaatata cggcagaatt caaattggaa
5581 gctgttaagc tggcaaatga acaaagaaag gtaggtcaac cagttgcaaa agtagcaaga
5641 gatctaggaa taagggatag tgtattagga aaatggatga agaaatataa cgaaaaaaag
5701 tcagcggcaa atgcatttcc agatgtagca cttatgaca aagagagatt tgatttacag
5761 aaagagttag caaaagtaac aagagaaaga gacattttta aaaaagccct ggccagtcaa
5821 aaagagtaaa atattttttt atatagtaac tgctataaag tacaggaatt atgtaggatt
5881 ttctgctagt ggctactata agtgaccac aagaaaaata agcagtagag aatcagcaaa
5941 taaagagtta ttagcagata ttcaaaaaat atatcaagct tctaaatgta gatatggagc
6001 tcctaaaatt catgctgaat taaaggcttt gggtaaaaag tgcaacttaa aaacagtgca
6061 aagtattatg cagaaaaatg gtattcaggc tatattgaga agaaaattta aaattaagaa
6121 acaacaaacg gacagtagct cccaatatat tagaccaaaa ctttattgtc gatcaaccaa
6181 ataaagtatg ggattactta tataaaaacc aaagaaggat ggctatattt ggcaacaata
6241 atcgatctat attcacgcat ggtagttaat gagcagttca ataaataaac aattggttat
6301 ggactcttta ttaatggacg ttaacaagcg taaacctgcc aaaaatctac tattacatag
6361 tgatcaaggt tcacaatata ctttgcaagg ttatcaatat ctcttatcca taaaaaacat
6421 agatgagtca taaaggttgt tgttacgaca attctgttgt ggaaagcttc ttcagttctc
6481 taaaaaggga gttaccaata gacacctctc ggcaactctaa acagcatatc aaaactgcta
6541 tatttgaata tatagaaatt ttttataaca aacaacgtca ctattaacta ttgcattc

```

//

```

LOCUS      JAQZAU010000127          15804 bp    dna        linear      ENV 17-MAR-2023
DEFINITION MAG: Wolbachia pipientis isolate wEsol contig_58918, whole genome
            shotgun sequence.
ACCESSION  JAQZAU010000127  JAQZAU010000000
VERSION    JAQZAU010000127.1
DBLINK     BioProject: PRJNA929258
            BioSample: SAMN33142973
KEYWORDS   WGS; ENV; Metagenome Assembled Genome; MAG.
SOURCE     Wolbachia pipientis (insect metagenome)
ORGANISM   Wolbachia pipientis
            Bacteria; Pseudomonadota; Alphaproteobacteria; Rickettsiales;
            Anaplasmataceae; Wolbachieae; Wolbachia.
REFERENCE  1 (bases 1 to 15804)
AUTHORS    Fiutek,N., Couger,B.M., Roy,S., de la Torre,J.R. and Connor,E.F.

```

TITLE Genomic assessment of the contribution of the Wolbachia  
 endosymbiont of Eurosta solidaginis to gall-induction  
 JOURNAL International Journal Molecular Sciences  
 REFERENCE 2 (bases 1 to 15804)  
 AUTHORS Fiutek,N., Couger,B.M., Roy,S., de la Torre,J.R. and Connor,E.F.  
 TITLE Direct Submission  
 JOURNAL Submitted (10-FEB-2023) Biology, San Francisco State University,  
 1600 Holloway Ave, San Francisco, CA 94132, USA  
 COMMENT ##Genome-Assembly-Data-START##  
 Assembly Date :: JUN-2019  
 Assembly Method :: FLYE v. 06-2019  
 Genome Representation :: Full  
 Expected Final Version :: Yes  
 Genome Coverage :: 100.0x  
 Sequencing Technology :: Illumina HiSeq; PacBio Sequel  
 ##Genome-Assembly-Data-END##  
 FEATURES Location/Qualifiers  
 source 1..15804  
 /organism="Wolbachia pipientis"  
 /mol\_type="genomic DNA"  
 /submitter\_seqid="contig\_58918"  
 /isolate="wEsol"  
 /isolation\_source="galls on Solidago altissima"  
 /host="Eurosta solidaginis MN-2018-EFC"  
 /db\_xref="taxon:955"  
 /environmental\_sample  
 /country="USA: Cowling Arboretum, Carleton College,  
 Northfield, MN"  
 /lat\_lon="44.48 N 93.13 W"  
 /altitude="280 m"  
 /collection\_date="2018-11"  
 /metagenome\_source="insect metagenome"  
 /note="metagenomic"  
 gene complement(<1..256)  
 /locus\_tag="wEsol\_01485"  
 CDS complement(<1..256)  
 /locus\_tag="wEsol\_01485"  
 /codon\_start=1  
 /transl\_table=11  
 /pfam="NUDIX Pfam-B\_1670"  
 /fullproduct="qcoverage 100 , hcoverage 82.5242718446602  
 , similarity 100 , identity 100 , evaluate 6.07e-54 ,  
 alnlength 85 , Bacteria , Proteobacteria , WP\_041573519.1  
 MULTISPECIES: NUDIX domain-containing protein  
 [unclassified Wolbachia]"  
 /translation="MIYQVEIAETLEEALVREIREETGCLVKQYDQIQTVTSLYHYNE  
 DNVNKCLKHIAVLYKIEIIGEIKRES DGKSDGCIWQSIDT"  
 /product="NUDIX  
 domain-containing protein"  
 /besthit="qcoverage 100 , hcoverage 82.5242718446602 ,  
 similarity 100 , identity 100 , evaluate 6.07e-54 ,  
 alnlength 85 , Bacteria , Proteobacteria , WP\_041573519.1  
 MULTISPECIES: NUDIX domain-containing protein  
 [unclassified Wolbachia]"  
 gene complement(231..446)  
 /locus\_tag="wEsol\_01486"  
 CDS complement(231..446)  
 /locus\_tag="wEsol\_01486"  
 /codon\_start=1  
 /transl\_table=11

```

/product="hypothetical protein"
/pfam="AGTRAP"
/translation="MSNCIYNTLFCIIDFLNYYINSNIFDLMKDDIIYHSHLGVYGLI
LKPKSIVLVKKS RGPYKGLFDLPGRNC"
/besthit="qcoverage 49.2957746478873 , hcoverage
25.1798561151079 , similarity 85.7 , identity 85.7 ,
evalue 4.24e-09 , alnlength 35 , Bacteria ,
Proteobacteria , WP_209452318.1 NUDIX domain-containing
protein [Wolbachia endosymbiont of Ceratosolen solmsi]"
gene 1476..2564
/locus_tag="wEsol_01487"
CDS 1476..2564
/locus_tag="wEsol_01487"
/codon_start=1
/transl_table=11
/pfam="HTH_29 HTH_23 HTH_28 Pfam-B_17750 rve Pfam-B_10563
rve_3 Pfam-B_18326"
/fullproduct="qcoverage 100 , hcoverage 100 , similarity
100 , identity 100 , evaluate 4.74e-263 , alnlength 362 ,
Bacteria , Proteobacteria , WP_015588908.1 MULTISPECIES:
IS481-like element ISWpi2 family transposase
[unclassified Wolbachia]"
/translation="MSTIQTKILKPKLGLLELAKQLGNVSQACKVMGYSRDTFYRFKE
LYENGGEALHEISKKKPLLANRVSDDI ERAVIGIATEFPAYGQERAANELRKGIII
SQGGVRSVWLRNDLETLKKRLKALETKVAQDGIILTEEQLAALEKVKEQREAHGEIET
QHPGYLGSQDTYYVGNIKGIGRIYQQTFVDTYSRVAMVKLYTDRTAITAADLLNDRVI
PFFDEQKIPLLRLTDRGTEYCGKPENHAYQLYLG IENIDHSRTKANS PQTNGICKRF
HRTMQDECYNIIFRKKIYSSLEDLQIDVDHWLRSYNETRPHSGKYCYGKTPMQTF LDS
KYIAFQKNISSITQEPDISFDYLNSSVS"
/product="IS481-like element
ISWpi2 family transposase"
/besthit="qcoverage 100 , hcoverage 100 , similarity 100
, identity 100 , evaluate 4.74e-263 , alnlength 362 ,
Bacteria , Proteobacteria , WP_015588908.1 MULTISPECIES:
IS481-like element ISWpi2 family transposase
[unclassified Wolbachia]"
gene complement(2674..5160)
/locus_tag="wEsol_01488"
CDS complement(2674..5160)
/locus_tag="wEsol_01488"
/codon_start=1
/transl_table=11
/pfam="Ank_2 Ank_2 Ank_5 Ank_4 Ank Ank_5 Pfam-B_10896
Ank_3 Ank_4 Ank DUF3447 Ank_5 Ank_2 Ank Ank_3 Ank_4 Ank_2
Ank_2 Ank_4 Ank_5 Ank Ank_3 Pfam-B_5362"
/fullproduct="qcoverage 100 , hcoverage 98.5714285714286
, similarity 100 , identity 100 , evaluate 0.0 , alnlength
828 , Bacteria , Proteobacteria , WP_174516872.1
MULTISPECIES: ankyrin repeat domain-containing protein
[unclassified Wolbachia]"
/translation="MRVKMVRSIFNRGGVMELNKLQEVLSTANADVGLSKSNVVS KIE
ERLKQVDPGTLCQLSFAVLKNNKQMVETLIKGGADVNTIDAYNRDPLYYAISQGNTRM
VEILIKNGASVNKKYNDGSTPLHHAVLSQKIKIVEY LINNGADVNALDEKRRTPLYLA
GRSTQMVSI LMKKGAFPLENRDIEFLKDLAKRIKDDDEY LKEVKVEQKEGRVDDKY
ESIKYSLLLSDNSSLT SIIKREKFKNLISDWSFNVPDLKDNQKNLNLKALLNLLTDFPF
CDITRFEDFLHDNKGDDLKAVLNLRGESKLTILHVIQGM EYLAVEKDIGCAVSAMT
LLLKSGADPNIVNSEGQTPLHYAAYNTLNIPLLLKKGARSQPDRQGKTPLDIVIINK
KPFVEVNLLEQIFLTQEQL EAKNDLEGVC GHSFNTNRLRKFFNQHKGNEGLKEILNLRD
CEGKSRV FQKIREACYGNETHFKEAKKLLLEAG AIDYEEWKDKKRLPKLRTLWDDLIL
DQSEKLKIFLGRV NKS KDIDELKR VVNEA IELGVRLNFPNQGSIY GKVYEKEYSFTDF

```

```

VIRKISELRKSSEGSRNIEVASGIVCQLISKGAILYNISSIIYVIDELEEFESHKANMK
NAYADYENRALDFITIVQSATSGKVRDVKIDNSTLCLEYSQDSKVDVAKITNGARGLG
ITQEGVQYGRNIIKIGKSEVEIITENAIRNYVGLADGSNIVLTFDTGLGELEVRLYPD
KQNLIKVEVEDQEKKWKKLQNCERIGEKCLLGGCSVRDAIERGFFTRSGELIRSETIS
QSDATKVGPPWAKREKMRKASSLEETVGRSL"
/product="ankyrin repeat
domain-containing protein"
/besthit="qcoverage 100 , hcoverage 98.5714285714286 ,
similarity 100 , identity 100 , evaluate 0.0 , alnlength
828 , Bacteria , Proteobacteria , WP_174516872.1
MULTISPECIES: ankyrin repeat domain-containing protein
[unclassified Wolbachia]"
gene complement(5178..6902)
/locus_tag="wEsol_01489"
CDS complement(5178..6902)
/locus_tag="wEsol_01489"
/codon_start=1
/transl_table=11
/pfam="Ank_2 Ank_4 Ank_5 Pfam-B_2980 Ank Ank_3
Pfam-B_1714 Ank_4 Pfam-B_5801 Ank_5 Pfam-B_10896 Ank_2
Ank Ank_3 Ank_4 Ank_5 Ank Ank_3 Ank_4 Ank_5 Pfam-B_10896
Ank_2 Ank Ank_3 Ank_4 Pfam-B_1873 DUF249 Ank_5 Ank Ank_3
Ank_4 Pfam-B_1873 Ank Ank_3 Ank_5 Ank_2 Ank_5 Ank_4 Ank_3
Ank_2 Ank Pfam-B_14646 Ank Ank_3 Ank_5 Pfam-B_1873 Ank_4
Ank_5 Ank Ank_3 Ank_2 Ank_4 Ank_5 Ank Ank_3"
/fullproduct="qcoverage 100 , hcoverage 105.90405904059 ,
similarity 78.2 , identity 77.0 , evaluate 2.55e-117 ,
alnlength 574 , Bacteria , Proteobacteria ,
WP_182282556.1 ankyrin repeat domain-containing protein
[Wolbachia pipientis]"
/translation="MGNQLEEVSNPINIQADLEENSMVDGIEKRSKEQGFYATQTIP
YQVNQNITYSYLATLDSHLKTDEHCVHESNIHTDLLNFAFHGSLEKVQDLLNKGASVE
TEDNDGNTPLHFAASKGHFVIVEALLEKGATVEVKNNEGATALHIAAQMGHLNVVQFL
LDNGTDVDAQKYNGDTALHIAAEAGKLEVVQFLLKRGASFKVIDDEGATALHVAAQMG
HLNVVQFLLDNGTDVDAQKYNGDTALHIAAEAGKLEVVQFLLKRGASFEIRGYQDCTA
LHCAAIGGNLKVQFLLGKMNNADIRKNSFKCVLHIAARKGYLEIVKALLDKGTDINA
TNYDGDALNEAAGCGRLKVVQFLLDKGASFEARNEEGCTALHIACEVGYLGVKALL
EKGSDVNVVSKKNGDTPLHEAARMNRYDIVEYLVVEEEKATIDVKNFRCKTPSDLADSN
GYKDIVKYLSLRVRECPKTSGLADNKNVIQYQKV TENKHLTITNRAIKTSFCV GIMT
MLTSVAIGCIAIHL SLSISATAALIVGAIAGGITYAVLKPSSRLNECEVNRQSLPQMP
KDECCMSY"
/product="ankyrin repeat domain-containing
protein"
/besthit="qcoverage 100 , hcoverage 105.90405904059 ,
similarity 78.2 , identity 77.0 , evaluate 2.55e-117 ,
alnlength 574 , Bacteria , Proteobacteria ,
WP_182282556.1 ankyrin repeat domain-containing protein
[Wolbachia pipientis]"
gene 7520..10201
/locus_tag="wEsol_01490"
CDS 7520..10201
/locus_tag="wEsol_01490"
/codon_start=1
/transl_table=11
/product="hypothetical protein"
/translation="MQFNSSGGIGKDSLTYQNVKNLSLKENSIRNP KKTGKENSESAAI
SVARVGASVEEKTAARSCPYARKTKTRIENLPPKRNSIRNLDLNRIGKENSESAAISV
ARIDANAEEKTTARNHLCKRAGTQVEEDLVFPKKVKTL LFRVEGSNSIIGNQNELKV
RQVEAE LDKASN LLEEKQSSFD SQAVQPEESKTKIEEAQKEISDERDQLERELEGSSN
AAIELNNKVKELEEKNDQVNELNEKVFSIETERNTLKDQITKIQNELARKESEIGRLN

```

```

DQLSKSYQHIEQLKQDKNKKEEELLDQQNKVKELNDKVNSITNERNCNLNGQIETQILLE
KNIEAYVEEQLARKESEIGRLNDQLSKSYQHIEQLKQDKNVEEQLARKESEIGRLNDQ
LSKSYQHIEQLKQDKNKKEEELLDQQNKVKELNDKVNSITNERNCNLNGQIETQILLEKN
IEAYVEEQLARKESEIGRLNDQLSKSYQHIEQLKQDKNKKEEELLDQQNKVKELNDKV
NSITNERNCNLNGQIETQILLEKNKEFDEFKKERDTLTNQVQEKKNELSAKEEAFSKVQT
NAQDLTYEVNQKDQQLQVREKQRLQLEAKFRGLNEKYSEVKNKDRGYIENLTCKLRQA
KSEFIDNENKLSQIEKLKEEKEILLEQLRAKSTGSASFRKQQSKIDSLKQQIKQKEE
PKSVRNLEQLQNISGQNKIETTPENSAESELNSTRLTEFEGNNIHVQASAAPAATVT
SMNVKNIEKVPVMLETPSDKSGSQKLVSQVQEMSSVANESSGQVNGSQTNMGQPNNSS
NGSIIVTQSVQKNKWPTTATWKLAIAGVLGIAASVAYFTFSASLLVTGVIAGVGACC
LVAAAIVYYCNKPSSSLEKSSIDKVAVNGYTAAASCE"
/besthit="qcoverage 146.920492721165 , hcoverage 100 ,
similarity 61.3 , identity 60.8 , evaluate 0.0 , alnlength
1312 , Bacteria , Proteobacteria , WP_141456733.1
hypothetical protein [Wolbachia endosymbiont of Carposina
sasakii]"
gene 10466..15616
/locus_tag="wEsol_01491"
CDS 10466..15616
/locus_tag="wEsol_01491"
/codon_start=1
/transl_table=11
/fullproduct="qcoverage 100 , hcoverage 100 , similarity
99.2 , identity 99.2 , evaluate 0.0 , alnlength 1716 ,
Bacteria , Proteobacteria , WP_211908384.1 hypothetical
protein [Wolbachia endosymbiont of Spodoptera picta]"
/translation="MLSKETSTSLQDIENSSHKQSGHSRSPGKESRKT SRKRGRSVTD
KDGTVSKRLRMDVNVASNEDEFPDQLQDKPGQDELDNTCQTKQYIPHHLIGIMYRLD
LSVLCSLRESMYKNKYPLLSLAFGDSEIDKFNDIVLRYEKKSIHIKIENVDKYYVNG
ISYARLFTKEKRSFSINNYFDSFVKHLISKSDSLSNIEYLIVYTNSGFDLTKEKNLR
EGKFKNFYPFKFDSEIKIEEFDLLKDFLFINDNTQESGFYRFSRDKTTEELLRRLEFS
SAMQKVIKERKISQFEKEIKEAFLDKLVFAVNQPNREELNSIIKNEIEKNSTVEDDY
IALQERVLRDLTAPEKDKKLENHVSRIIYEFNLLMLFLHDMFLYKNIFSINYEGKTHD
ISNNIALDYKDKITYVKAYNTNGNIGYSQLFFPYRQQSMFSINKYFTLFEELRESIEY
FIIYTNANLDLTEEKKLKEGRSKDFYPLKFDNDKALRDCLCINGNGLYRFVQEEATR
KLLSLLKLPPSLQKEKEERLSSENEQEIKEKFLDKLIFAINQPNREELNNIVKDEID
TFDVPYNYEELHEIALRWSESHEFGPLTKGIMEKLLGDIKNNRSSYKKIQKNINEEI
KFARSVVGREGIPAFNQFLNFLTITGEGIKCLEVLKREGIDLARMSSILHVAGAKA
FKDLYDIWFNEQGKNTQYLKTLEKEGINLSNMSSILGGAGSNASRAFKDLHDLWFDVE
GSKTQYLKTLEKEGIDLARMSSILSGAGANAANKAFKDLYDIWFNEQGKNTQYLKTLEK
EGVNLSNVSSILNVAGVNAAKVFKDLYDLWFDVEGKNTQYLKTLEKEGIDLARMSSIL
SGAGANAANKVLKDLYDIWFDGEGSKKQYLKTLEKEGIDLARMSSILSGAGVNAANKAF
KDLDIWFDAGSKKQHLKHFIEDKDRKKSFTLHNLSGILSRAGANAKDAFEKFHVSVC
SDKGKRTLLDDFYKAGFTPSNLSSTLCGAGTRASFILKRFHSTCFNEKREKTKFLDD
FYKAGFKPRDLCGVLSSAANSLLKHFHDFCFTEETKKYLNHFLIEKEGFIPKNLSKILH
GAGANICSAKDFHDVCFDETGNKTQLLDDFYEAGFRPGDLSNLSMAGNNAASILRN
FHKSCFNKENYLDRLFYGGKLFPTPKDLSKILYGVGINICPTFKKLHDLCFDKVGNITK
YLNLIKNPPNKMNLNILEYEVKRKSPSAFLDEQNVSEGDRTTSVGLKPSSLPGKTKQK
QDLGLQGGDSKAKRKPRKGITNRSKNGQDDKVLDTVAGSSRDLSQRRGTREKQIQSV
YHNKKGQLRLSKFVSFIEPVEQGLYLPSEERGVKTDGKCVTITRGLSQALFLQSDKS
FLSNLETSVEIYERIAQGKQISEGEEREVFALSKLLDNFERQLDSVTNSLPSSSIHTK
GYKTSDDLSNYIAGVKGDFAIHLVTSNHVVAIYRTGDNYAYFDSNAAFISELKTVDQL
MKIVEKAVKFAGYKIEEKGFALAEHFDVGKANNLLSSEDKQILAKEIKTEHQLLAEQDK
ELGLIKINGQELSRVQLYDFGTKINVEGSVPLLINSMDMNLSSSEKLQDHLNKKVIMTA
REYLDLSLRNSKNIEEVQATKVIPIFIGSKREIEEAEQTRKPKRSLLEQLAKGAVNFMA
SNLTTAFTTNVSRLESQLPVKTDNEPQAYLNDPTVEKQLQRSYQTISS"
/product="hypothetical protein"
/besthit="qcoverage 100 , hcoverage 100 , similarity 99.2
, identity 99.2 , evaluate 0.0 , alnlength 1716 , Bacteria
, Proteobacteria , WP_211908384.1 hypothetical protein

```

```

gene      [Wolbachia endosymbiont of Spodoptera picta]"
          complement(15598..>15804)
          /locus_tag="wEsol_01492"
CDS       complement(15598..>15804)
          /locus_tag="wEsol_01492"
          /codon_start=1
          /transl_table=11
          /product="hypothetical protein"
          /pfam="Pfam-B_12519 Yael_N Pfam-B_10245 Pfam-B_9730
          Pfam-B_12708"
          /tigr="TIGR01784 T_den_put_tspse 273 conserved
          hypothetical protein"
          /translation="QKGRLEGRLEGRLEGIQIGHEKGRVEGRKERDIEVAKNSLKAGV
          PIDVIAEITGLSVNDIKQLQEEIV"
          /cog="COG5464 COG5464 289 Uncharacterized conserved
          protein"
          /besthit="qcoverage 100 , hcoverage 21.656050955414 ,
          similarity 98.5 , identity 98.5 , eval 1.06e-19 ,
          alnlength 68 , Bacteria , Proteobacteria , WP_141456735.1
          Rpn family recombination-promoting nuclease/putative
          transposase [Wolbachia endosymbiont of Carposina
          sasakii]"

```

# ORIGIN

```

1 tagtatctat actttgccat atacaacat cagaatcttt tccatcagat tctcgcttta
61 tttctcctat gatttcaatt ttgtataaaa ctgctatatg ttttagacat ttatttacat
121 tgtcttcatt ataattgatat aggctagtaa ctgtttggat ttggtcgtat tgtttcacta
181 aacaacctgt ttcttctcta atttctctta caagtgcctc ttcaagcggt tcagcaattt
241 ctacctggta aatcaaacaa ccctttataa ggacctcgac tttttttcac caaaactata
301 ctttttaggtt ttaaaattaa accgtatacg cctaagtgag agtgataaat aatatcatct
361 ttcattaaat caaaaatatt agagttaata taataattta aaaaatcaat tatacaaaat
421 aatgtattat aaatacaatt actcaatata aaaattccac ttaacaaatt tataaaagta
481 tagcttctac gtcataccgt cacggtatct cttagcatag atcctgctaa caagtagcgg
541 gatacttaac cgtcataccg ccgcggtatc tcttagccgc taacacgtag cggtagtgacg
601 attgtcgttt aactataaat atttaagaaa tttaccaaag gaaaaaaaag gcaaaagaaa
661 ccccgtagtg cgagttttga ctctctaata ctttaaaatt gcgctataat aatgtgctga
721 cgcttagttt aagcgcgatt tggctgaatg tagaaaaatt ttaaaagaca tgcagccgct
781 ataattgtat gtaatccgcc aaaagatacc ctgagttttt tactgaattt tgtcattgag
841 cctgcaggtc aaaaacaagt tttgagtcac aaataccctt aatgccatga cgtgtataat
901 aatgtttaca aaaataatat catagaattc aataggataa tccctagaga attactcatc
961 taaaaaaagc caaatcgtgt taatgctgtt tagatgtaaa agataagcta aatctttaca
1021 gggaatttaa aacagtagaa tacctttgat tgaaaaaaag aaccaaacta ggcaacttaa
1081 ccggtttgct atttcaacta ctacaactaa atcaataaat cttaataggg ggaaaaacat
1141 catgagtgcg ccaagaagtg cgtaaagttc agttggtgaa aatccaaccc aggcaaagcc
1201 tagccagcaa cctggaacga accattatgc tgcgtaaggt gacgagcgta gtaaagctag
1261 tggaaggtgt aaaagacaag atttgatctg acagacaaga attaactgac agaagaattg
1321 aggtagtcaa aactaatatc aggctcttgt gtaatgctac taatattttt ctgaaaagca
1381 atatatttgc tatcaagaaa agtgtattaa ataagacttg acctgacact ttaaaaaagt
1441 aagttaaaaa taataaaaaat aaaggagtgt tagatatgag tacaatacag acaaaaaatat
1501 taaaacaaaa gctaggatta ttagaactag caaaacaact aggaaatgtg tctcaagcat
1561 gcaaagtgat gggatactca agagatacat tttatcgctt taaggagtta tatgaaaatg
1621 gaggagagga agcattacat gaaataagta agaaaaaacc gctattagca aacagagttt
1681 ccgacgatat agaaagagca gtgattggta tagcaacaga atttccagca tatgggcaag
1741 aaagagctgc aatgaactg agaaaaagag gtataataat ttctcagga ggagtaaggt
1801 ctgtatggct aagaaatgac cttgaaactc tcaaaaagag acttaaagca ctagagacaa
1861 aagtagctca agacggaatc attttaactg aagaacaact tgcagcttta gaaaaagtga
1921 agaacaaaag ggaagctcat ggtgaaattg agacgcaaca tccaggttat ttgggttctc
1981 aagataccta ttatgtgggc aatatcaaag gtatagggcg catttatcag caaacttttg
2041 ttgatactta ttccagagtt gcaatggtta aactttacac ggacagaaca gctattacag
2101 ctgcagatct tctcaacgat agagttattc cattttttga tgagcagaaa attccattat
2161 tacgcatttt aactgatagg ggtacggagt actgtggcaa gcccgaaaat cacgcttattc

```

|      |             |             |             |             |             |             |
|------|-------------|-------------|-------------|-------------|-------------|-------------|
| 2221 | agctttat    | gggcatagaa  | aacatcgatc  | attctagaac  | taaagccaac  | tctccacaga  |
| 2281 | ctaattggcat | atgtaaaaagg | tttcatagaa  | ccatgcaaga  | tgagtgttac  | aatatcatct  |
| 2341 | ttagaaagaa  | aatctacagt  | tctttggaag  | atctacagat  | tgatgttgat  | cattggttgc  |
| 2401 | gttcttataa  | tgagacaaga  | cctcactcgg  | gtaaatattg  | ctatggcaaa  | acgcctatgc  |
| 2461 | aaacttttct  | tgatagcaaa  | tatattgctt  | ttcagaaaaa  | tattagtagc  | attacacaag  |
| 2521 | agcctgatat  | tagttttgac  | tacctcaatt  | cttctgtcag  | ttaattcttg  | tctgtcagat  |
| 2581 | caaactctgt  | cttttacagg  | ctgaacagat  | acaaataaga  | caaatttctc  | aaaaaatctt  |
| 2641 | ttaaaatggt  | aacttaacat  | caccatcact  | tcattataga  | gaacggccta  | ctgtttcttc  |
| 2701 | aagacttgaa  | gcttttctca  | ttttttcgcg  | ctttgcccaa  | gggcccaact  | ttgttgcatc  |
| 2761 | agattgacta  | attgtttcag  | aacgaatcaa  | ctctccagat  | ctagtaaaaa  | aacctcgttc  |
| 2821 | aatagcatca  | cgtactgaac  | acccaccaag  | caaacatttt  | tcccctattc  | gttcctcaca  |
| 2881 | attctgtaat  | tttttccact  | tttcttgatc  | ttctacttct  | acctttatta  | gattttgctt  |
| 2941 | atcagggtat  | aatctcactt  | ccaactctcc  | caagccagta  | tcgaaagtca  | atactatatt  |
| 3001 | actaccatct  | gctaggccta  | cataattcct  | tatagcgttt  | tccgttataa  | tttctacctc  |
| 3061 | actcttacct  | atctttatta  | tatttcttcc  | gtattgtaca  | ccttcctgag  | tgatacctaa  |
| 3121 | acccttgct   | ccatttgtaa  | tctttgcaac  | atctacttta  | ctatcctgtg  | aataattcaag |
| 3181 | acagagagta  | gagttgtcga  | tttttacgtc  | tcttacctta  | ccacttgttg  | cgctttgaac  |
| 3241 | gattgttatg  | aaatctaaag  | cacgattctc  | ataatctgca  | taagcgtttt  | tcatattagc  |
| 3301 | tttgtggctt  | tcaaactcct  | ccagttcgtc  | aattacatat  | atactgctta  | tgttgtacaa  |
| 3361 | aattgcccct  | tttgatatca  | attgacatac  | tataccacta  | gcaacctcta  | tattccttga  |
| 3421 | accttcggaa  | ctctttctta  | attcactaat  | ctttcttatc  | acaaaatctg  | taaaactata  |
| 3481 | ttccttttca  | tatacctttc  | cgtatatact  | accctggtta  | ggaaagttca  | gccttaccct  |
| 3541 | aagttctata  | gcttcgttta  | caacgcgttt  | taactcatct  | atatcttttg  | atatttttac  |
| 3601 | cctacccaaa  | aatattttca  | acttttccga  | ctgatctaata | attaaatcat  | cccatagagt  |
| 3661 | tctaagctta  | ggcaaacggt  | ttttgtcctt  | ccactcttcg  | taatcaatcg  | ctcctgcttc  |
| 3721 | tagcagcaac  | ttttttgctt  | ctttgaaatg  | agtttcatta  | ccataacaag  | cctccctaata |
| 3781 | cttttgaaaa  | actcgagact  | ttccttcgca  | atcacggaga  | ttgagaatct  | ctttaagacc  |
| 3841 | ttcatttcct  | ttgtgctgat  | tgaaaaactt  | tcttagtcga  | ttagtgttaa  | agctatgacc  |
| 3901 | gcaaacacct  | tctaaatcat  | tttttgcttc  | caattgctcc  | tgagttaaaa  | agatctgttc  |
| 3961 | taaaagattc  | acttcaaaaag | gttttttggt  | aataattaca  | atgtctagag  | gagtttttcc  |
| 4021 | ttgtctgtca  | ggttgactac  | gtgctccttt  | tttcagaagc  | aaaggatatat | ttaaagtatt  |
| 4081 | ataataagca  | gcatagtgc   | aagggtgtttg | cccttcaactg | ttaactatgt  | taggatcagc  |
| 4141 | accagatttt  | aaaagtaaaag | tcataaaatgc | actaaactgca | caacctatgt  | ctttttccac  |
| 4201 | tgctaaatac  | tccatacctt  | gtattacatg  | tagtattgtc  | aatttggatt  | ctcccctttg  |
| 4261 | aagattgaga  | acagctttta  | gatcatcacc  | tttgttatcg  | tgtaaaaagt  | cctcaaacct  |
| 4321 | tgtaatgtca  | caaaatggaa  | agtctgtaa   | aagatttaac  | agtgccttat  | tcaaattttt  |
| 4381 | ttggttatct  | tttaaatcag  | gtacgttgaa  | agaccaatca  | gatattaaat  | ttttgaattt  |
| 4441 | ttccctttta  | ataatagagg  | tcaaagagct  | gttatcacta  | agcagcaacg  | agtatttaata |
| 4501 | tgactcatac  | ttatcatcta  | cccgccctc   | cttctgttct  | acctttacct  | ccttttaata  |
| 4561 | ctctgtatca  | tcacttttaa  | tgcgttttagc | tagatccttt  | aaaaattcaa  | tatctctgtt  |
| 4621 | ttccagtaaa  | gggaatgctc  | ccttcttcat  | gagaatcgag  | accatttgtg  | tacttcgtcc  |
| 4681 | agctaagtat  | aatggagtg   | gccgtttttc  | atctaacgca  | ttaacatcag  | ccccattgtt  |
| 4741 | tataagatac  | tctactat    | ttattttttg  | gctcaagaca  | gcatgatgta  | gaggagtgt   |
| 4801 | tccgtcatta  | tacttcttat  | taacacttgc  | tccatttttt  | attaggatct  | ctaccattct  |
| 4861 | tgtgttccct  | tgtgagatag  | cataatataa  | tggtatcacga | ttgtacgc    | caattgtgtt  |
| 4921 | aacatcagct  | cctcctttta  | taagggtttc  | taccatttgt  | ttgttgtttt  | ttaaaacagc  |
| 4981 | aaaactta    | tggcacaatg  | tacctggatc  | tacttgtttt  | aatctctctt  | ctattttact  |
| 5041 | aactacatta  | ctcttactta  | aaccaacatc  | agcggttagca | gtacttaata  | cttcctgcaa  |
| 5101 | tttattcaat  | tccataactc  | cacctcggtt  | aaaaatacta  | cgcaccattt  | ttacacgc    |
| 5161 | gacataaaa   | gcaagaacta  | atatgacatg  | caacattcgt  | ccttaggc    | ttgaggtaag  |
| 5221 | ctttgcctat  | tcacttcaca  | ttcattttagc | ctactactag  | gctttaatac  | tgcatatgta  |
| 5281 | atgccaccag  | caatggcccc  | aacaatcaat  | gcagcagtag  | ctgatattga  | taaaactaaga |
| 5341 | tgaatagcaa  | tacatccaat  | agctacactt  | gtcaacatgg  | tcattatgcc  | tacacagaaa  |
| 5401 | ctggctctta  | ttgctctatt  | agttatagtt  | aggtgtttat  | tttctgtcac  | tttttgatac  |
| 5461 | tgtatcacat  | ttttattgtc  | agccagactt  | cccgagggtt  | tgggacactc  | ccttactcga  |
| 5521 | agactaagat  | acttaactat  | atctttgtaa  | ccattggaat  | ccgccaaaatc | ggaaggagtc  |
| 5581 | ttacatctaa  | agtttttttac | atcaatagta  | gccttttctt  | cctctacaag  | atattcaact  |
| 5641 | atatcgtagc  | gattcattct  | agcagcttca  | tgtaatggag  | tatcgccatt  | ttttttgctt  |
| 5701 | actacattaa  | catcagatcc  | cttttctaac  | agagcttttaa | ctatgcctaa  | atagcccacc  |
| 5761 | tcacaagcaa  | tatgcaaagc  | agtgcactct  | tcttcgtttc  | gtgcttcaaa  | actagctcct  |

|      |             |             |             |             |             |            |
|------|-------------|-------------|-------------|-------------|-------------|------------|
| 5821 | ttgtctaaca  | aaaattgaac  | tacttttcaaa | cgaccacatc  | cagcagcttc  | atttaaagca |
| 5881 | gtatcgccgt  | catagtttgt  | tgcattaata  | tcagtacctt  | tgtctaatag  | agctttaacg |
| 5941 | atctctaagt  | aaccctttcg  | agcagcaata  | tgcaagacac  | atctgaaact  | attctttcgt |
| 6001 | atgtcagcat  | tattcatttt  | gcccaataaa  | aactgaacta  | ttttcaagtt  | tccccctata |
| 6061 | gcagcacaat  | gcaaagcagt  | gcagtcttga  | taacctcgta  | tctcaaaaact | agcacctctt |
| 6121 | tttaacagaa  | attgaactac  | ttctaatttg  | cctgcttcag  | cagcaatatg  | taaggcagtg |
| 6181 | tcaccattat  | atcttttgcgc | atcaacatca  | gtaccattat  | ctagcagaaa  | ttgaactacg |
| 6241 | tttaagtgaac | ccatctgagc  | agcgacatgc  | agcgacagtag | cgctttcatc  | gtctattacc |
| 6301 | ttaaaactag  | cacctctttt  | taacagaaat  | tgaactactt  | ctaatttgcc  | tgcttcagca |
| 6361 | gcaatatgta  | aggcagtgtc  | accattatat  | ttttgcgcat  | caacatcagt  | accattatct |
| 6421 | agcagaaatt  | gaactacggt  | taagtgaacc  | atctgagcag  | caatatgcag  | cgagtagcgc |
| 6481 | ccttcattgt  | tttttacctc  | aacagtagcc  | ccttttttcta | acagggcttc  | aacgattacg |
| 6541 | aagtggccct  | tgctagcagc  | aaaatgcaaa  | ggcgtgttac  | catcgttgtc  | ttctgtctca |
| 6601 | acgctagctc  | ctttgtttta  | tagatcttga  | acttttctcta | aggaaccatg  | aaaagcaaaa |
| 6661 | tttaagtaagt | cagtatgtat  | attacttttcg | tgtacacaat  | gctcatctgt  | ttttaagtga |
| 6721 | ctatcgagcg  | tagctaaata  | tgaatacgta  | atattttgat  | taacttgata  | aattggtatt |
| 6781 | gtctgtgttg  | cataaaaacc  | ttgttctttt  | gaccgctttt  | ctattccatc  | aaccatactg |
| 6841 | ttctcttcta  | aatctgcttg  | aatattttatt | ggattagata  | cttcttccaa  | ttgattaccc |
| 6901 | ataacactac  | cttaacttaa  | aaacttatgt  | tttaattatt  | acacaattat  | tataattagc |
| 6961 | aatagtttta  | tatttttttca | gaattacaaa  | tttattgtat  | tcagatatag  | gaaaatacct |
| 7021 | tttgtctcta  | aaaaacattg  | caaccaagta  | ttacaaagat  | ttcaattatt  | tacttcttca |
| 7081 | aagatcccaa  | aaagatcgta  | tctttgtgag  | aacaagctac  | gtaaaagtag  | ggttatgaaa |
| 7141 | ataggaactt  | gcaatctttg  | caacaaagtc  | agggaaatta  | gttcgtatgt  | ggatttagcg |
| 7201 | aaagtgaagc  | aatgtagctg  | gttttgcat   | ataataaaat  | tataatataa  | aaaagttcgc |
| 7261 | acagatcatt  | tggtagacca  | acgcattcca  | aaacgaacag  | ttctcatgct  | agctgctttt |
| 7321 | tgttgctaga  | aatgggtgta  | tcaattaagt  | ttttattgaa  | aattactagt  | aaattaatag |
| 7381 | tgatttcgca  | aaaaagttta  | ggcaattttt  | atgattaatt  | ttttataaaa  | aatggtgct  |
| 7441 | ttatagaaat  | attcaagtaa  | ttatatgtac  | agtgggtgtt  | tattagctta  | agcgatatga |
| 7501 | cagtttagga  | ggacttacaa  | tgcaatttaa  | ttcagggggt  | attggtaaag  | attctttaac |
| 7561 | atatcaaaat  | gttaaaaatc  | tttactcaa   | agaaaatagt  | atacgtaatc  | caaaaaaac  |
| 7621 | aggtaaggaa  | aatagtgaat  | cagcagcaat  | tagtggtgct  | agagtcgggtg | caagtgttga |
| 7681 | agaaaaaact  | gctgcaagaa  | gttgctcctta | cgcaaggaag  | actaaaactc  | gaattgaaaa |
| 7741 | tcttccaccc  | aaaagaaata  | gtatacgtaa  | tctagattta  | aacagaatag  | gtaaggaaaa |
| 7801 | tagtgaatca  | gcagcaatta  | gtgttgctag  | aatcgatgca  | aatgctgaaa  | aaaaaactac |
| 7861 | tgcaagaaat  | catctttgca  | ggaagagggc  | tggaactcaa  | gtggaagaag  | atcttgtatt |
| 7921 | tcctaaaaaa  | gtgaagacct  | tgttatttcg  | tgtagaggggt | tctaattcaa  | taatagggaa |
| 7981 | tcaaaatgaa  | cttaaagtcc  | gtcaagtaga  | agctgagtta  | gataaaagcaa | gtaacttact |
| 8041 | tgaagagaaa  | caaagtagct  | ttgacagcca  | agccgttcaa  | ccggaagaaa  | gtaagacaaa |
| 8101 | aatagaggaa  | gctcagaaaag | agatttcaga  | tgaacgagat  | cagctagagc  | gagaattgga |
| 8161 | gggaagtagc  | aatgctgcta  | tagagttgaa  | taataaaagt  | aaagagttgg  | aggaaaagaa |
| 8221 | tgatcaagtt  | aatgagctta  | atgaaaaagt  | tttctcaatc  | gagacagaaa  | gaaacacctt |
| 8281 | gaaagatcag  | atcacaaaaga | tacaaaatga  | gttagcaaga  | aaggaaagtg  | aaattggtag |
| 8341 | gcttaatgat  | cagctcagta  | aaagctatca  | gcacattgag  | cagcttaaac  | aagataaaaa |
| 8401 | taaaaaagag  | gaagagcttt  | tagatcaaca  | aaataaaagt  | aaggagttga  | atgataaggt |
| 8461 | taattcaata  | accaatgaaa  | gaaactgttt  | aaatgggtcaa | atagaaaactc | agttgcttga |
| 8521 | gaagaatata  | gaagcttatg  | tagaggaaca  | gttagcaaga  | aaggaaagtg  | aaattggtag |
| 8581 | gcttaatgat  | cagctcagta  | aaagctatca  | gcacattgag  | cagcttaaac  | aagataaaaa |
| 8641 | tgtagaggaa  | cagtttagcaa | gaaaggaaaag | tgaaattggt  | aggcttaatg  | atcagctcag |
| 8701 | taaaagctat  | cagcacattg  | agcagcttaa  | acaagataaa  | aataaaaaaag | aggaagagct |
| 8761 | tttagatcaa  | caaaataaaag | ttaaggagtt  | gaatgataag  | gttaattcaa  | taaccaatga |
| 8821 | aagaaaactgt | ttaaatggtc  | aaatagaaac  | tcagttgctt  | gagaagaata  | tagaagctta |
| 8881 | tgtagaggaa  | cagtttagcaa | gaaaggaaaag | tgaaattggt  | aggcttaatg  | atcagctcag |
| 8941 | taaaagctat  | cagcacattg  | agcagcttaa  | acaagataaa  | aataaaaaaag | aggaagagct |
| 9001 | tttagatcaa  | caaaataaaag | ttaaggagtt  | gaatgataag  | gttaattcaa  | taaccaatga |
| 9061 | aagaaaactgt | ttaaatggtc  | aaatagaaac  | tcagttgctt  | gagaagaata  | aggaatttga |
| 9121 | tgagtttaaa  | aaagaaaagag | ataccctaac  | taatcagggt  | caagaaaaga  | aaaatgaact |
| 9181 | cagtgcgaaa  | gaggaaagcat | tttcaaaagt  | acaaacaaat  | gcgcaagatc  | taacttatga |
| 9241 | ggttaatcag  | aaggatcagc  | aattagagca  | ggtagtgaga  | gagaagcaga  | gattagaagc |
| 9301 | aaagtttcgg  | ggttttaaatg | aaaagtattc  | agaagtaaaa  | aacaaagata  | gggggtatat |
| 9361 | tgaaaattta  | acttgtaaac  | taagacaagc  | taaaagtgaag | tttatcgata  | atgaaaataa |

|       |             |             |             |             |             |             |
|-------|-------------|-------------|-------------|-------------|-------------|-------------|
| 9421  | gctgagtgac  | caaatagaaa  | aattgaagga  | agaaaaggaa  | attttacttg  | aacagttaag  |
| 9481  | ggcgaaaagt  | acaggttcag  | catcgttcag  | aaagcaacaa  | tcaaaaatag  | atagccttaa  |
| 9541  | acaacagatt  | aagcaaaaag  | aagaaccgaa  | gtctgtcaga  | aatctagagc  | agttgcagaa  |
| 9601  | catatcaggg  | cagaataaaa  | ttgaaactac  | agtacctgaa  | aatagtgcag  | aaagtgaact  |
| 9661  | taattctact  | cggttgacag  | aatttgaagg  | aaataacata  | catgtacaag  | cttctgctgc  |
| 9721  | acctgctgca  | acggtaactt  | caatgaatgt  | aaaaaatata  | gaaaaagttc  | ctgttatgct  |
| 9781  | ggaaactcca  | tctgataaaa  | gcggaagtca  | aaaacttggt  | tctgttcaac  | aagaaatgtc  |
| 9841  | ttcggtagct  | aacgaaagct  | ctggacaagt  | gaatggttct  | caaaccaatg  | gcatgcagcc  |
| 9901  | taataattca  | agcaatggaa  | gtattattgt  | aacacaaagc  | gtacaaaaaa  | ataagtggcc  |
| 9961  | taccacagct  | acatggaaat  | tagcgatagc  | tggagtgcct  | gcaggaattg  | ctgcatcagt  |
| 10021 | tgcataTTTT  | actttcagtg  | ctagtttgct  | ggtaacagga  | gtaatagcag  | gtgttggagc  |
| 10081 | ttgttgctctg | gttgctgctg  | caattgtata  | ttattgtaat  | aaaccttcaa  | gttcacttga  |
| 10141 | aaagagtagc  | atcgataaag  | ttgcagtcac  | tggatatact  | gcagcagcaa  | gttgtgaata  |
| 10201 | aatacagtgg  | tctattattg  | aataatttgc  | tataattatt  | cgattattaa  | taaatgaaag  |
| 10261 | cttggtagtc  | caatctatcc  | caaaacacaa  | aactctcacg  | gtagttgttt  | ttagttaaac  |
| 10321 | aaaaagtaac  | tatactatta  | atttagtgat  | aaaaagcatg  | aaaatacata  | ccgattaaaa  |
| 10381 | taatttttatt | agtcacaaaa  | aaaaataact  | ttgctttgct  | aactttttcg  | actatcatat  |
| 10441 | ataatgaaaa  | tgataagagg  | cttatatggt  | aagtaaagaa  | acttctacat  | cgttgcaaga  |
| 10501 | tattgagaat  | tcctcacaca  | aacaaagtgg  | tcattcaagg  | agtcacagga  | aggaaagtgc  |
| 10561 | taaaacaagt  | agaaaacgtg  | gacgttctgt  | tacagacaaa  | gatggtacag  | tatcaaagag  |
| 10621 | gctgcgcatg  | gatgtaaatg  | ttgctagtaa  | tgaagattca  | gagtttccta  | gtgatttaca  |
| 10681 | ggataaacct  | ggacaggatg  | aattggataa  | tacttgtcaa  | actaagcaat  | acattcctca  |
| 10741 | tcacttgatt  | ggaattatgt  | atcgattaga  | cttgctcggtg | ctttgctcac  | ttagagagtc  |
| 10801 | tatgtataaa  | aataaatatc  | ctttattatc  | attagcgttt  | ggagattccg  | aaattgataa  |
| 10861 | atttaaatgat | attgtccttc  | gttatgaaaa  | gaagtctatt  | catataaaaa  | ttgaaaatgt  |
| 10921 | agacaagtat  | tacgtaaata  | atggcattag  | ttatgctaga  | ttatttacta  | aagaaaaacg  |
| 10981 | aagtttttct  | atcaataatt  | actttgatag  | ttttgttaaa  | catctaactc  | ctaaatcaga  |
| 11041 | tagttttatca | aataatatag  | aatatcttat  | tgtatatact  | aattcagggt  | ttgatcttac  |
| 11101 | aaaagaaaag  | aatttaagag  | aaggaaaatt  | caaaaatttt  | tatcctttta  | aatttgatag  |
| 11161 | cataaaaaata | gaagaatttg  | acctttttaa  | ggactttttg  | tttataaatg  | acaatacgca  |
| 11221 | agagagtggg  | ttttatcgat  | tttcgcgaga  | taaaacaaca  | aaagaagaac  | ttttaaggcg  |
| 11281 | gttagagttt  | tcgtctgcta  | tgcagaaagt  | aataaaaagaa | agaaaaatct  | ctcaggaatt  |
| 11341 | tgaaaaagaa  | ataaaaagaag | cattttttaga | taaattagtg  | tttgacagtt  | atcagcctaa  |
| 11401 | tagagaagag  | ctgaacagta  | ttattaaaaa  | tgaaatagaa  | aaaaatagca  | cagttgaaga  |
| 11461 | tgattatata  | gcattacagg  | aaagagtgtt  | acgtgattta  | acagctccag  | aaaaggataa  |
| 11521 | aaaactcgag  | aatcatgtgt  | ctagaattat  | atatgaattc  | aatctattaa  | tgctcttctt  |
| 11581 | gcatgacatg  | tttttgatata | aaaatatatt  | ttccataaat  | tatgaaggaa  | aaacccatga  |
| 11641 | tatatctaatt | aacattgccc  | ttgattataa  | agataaaaatt | acttacgtaa  | aggcttacaa  |
| 11701 | tacaaatggg  | aatattgggt  | atagtcagtt  | atttccctat  | agacaacaga  | gtatgttttc  |
| 11761 | tattaataag  | tatttttactc | tttttgattga | agaactaaga  | gagagtatag  | aatactttat  |
| 11821 | tatctatact  | aatgcaaatc  | tagatcttac  | agaagaaaag  | aagttaaaaa  | aagggcgatc  |
| 11881 | taaagatttt  | tatccttttaa | aatttgataa  | tgataaaagct | ttaagagatt  | gtttgtgtat  |
| 11941 | aatgggaat   | ggtctttatc  | gatttggtgca | agaagaagca  | acaagaaaaa  | agctttttaag |
| 12001 | tctattaaaag | cttccacctt  | ctttgcaaaa  | agaaaaagaa  | gaaagaagac  | tttctagtga  |
| 12061 | gaatgaacaa  | gaaataaaaag | agaaattttt  | agataaaacta | atatttgcaa  | ttaatcaacc  |
| 12121 | taatagggaa  | gaattgaata  | atattgttaa  | agatgagata  | gatacattcg  | atgttccata  |
| 12181 | taattatgaa  | gaattacatg  | aaatagcatt  | acgttggtca  | gaatctcatg  | aattcggccc  |
| 12241 | tcttacaaaa  | ggaataatgg  | aaaagctttt  | gggagatata  | aaaaataata  | gatctagtta  |
| 12301 | taagaagatt  | caaaaataaaa | acattaatga  | agaaataaaa  | tttgctagaa  | gtgtgggttg  |
| 12361 | tagagagggg  | atacctgcat  | ttaatcagtt  | cttaaatttt  | ttaattacag  | gagaagggat  |
| 12421 | aaagtgtcta  | gaagttctaa  | agagggaagg  | aatagatcta  | gctcgtatgt  | ccagtatttt  |
| 12481 | gcatgtagca  | ggagccaaaag | ctgcaaaaagc | ttttaaaagac | ttatatgata  | tttggttcaa  |
| 12541 | tgagcaagga  | aataaaaacac | aatattttaa  | aactctagaa  | aaagaaggaa  | taaatctatc  |
| 12601 | taatatgtcc  | agtatttttag | gtggagcagg  | atctaattgct | tctagagctt  | ttaaagactt  |
| 12661 | acatgacctt  | tggtttgatg  | tggaaaggaag | taaaacacaa  | tatttataaaa | ccctagaaaa  |
| 12721 | agaaggaata  | gatctagctc  | gtatgtccag  | tatttttgagt | ggagcaggag  | ctaacgctgc  |
| 12781 | aaaagctttt  | aaagattttat | atgatattttg | gttcaatgag  | caaggaaata  | aaacacaata  |
| 12841 | tttaaaaact  | ctagaaaaaag | aaggagtaaa  | tctatctaatt | gtgtccagta  | ttttaaatgt  |
| 12901 | agcaggagtt  | aacgctgcaa  | aagtttttaa  | agacttatat  | gacctttggg  | ttgatgtgga  |
| 12961 | aggaaataaa  | acacaataatt | taaaaaccct  | agaaaaagaa  | ggaatagatc  | tagctcgtat  |

```

13021 gtccagtatt ttaagtggag caggggctaa cgctgcaaaa gtcttgaaag acttatatga
13081 tatttggttt gatggagaag gaagtaaaaa acaatactta aaaactctag aaaaagaagg
13141 aatagatcta gctcgtatgt ccagtatttt aagtggagca ggagtcaatg ctgcaaaagc
13201 ttttaaagac ttatatgata tttggtttga tgcaaaagga agtaaaaaac agcatttaaa
13261 acatttttatt gaggacaaag ataggaaaaa aagttttaca ctgcataact tatctggtat
13321 attaagtaga gcaggagcta atgctaaaga tgcttttgaa aagtttcata gtgtttgttt
13381 tagtgacaaa ggaaaaagaa cagaactttt agatgatttc tataaggcag gttttacgcc
13441 aagtaactta tcctctacgt tatgtggagc aggaactcgt gcttctttta ttttaaaaag
13501 gtttcatagt acttgtttta atgagaaaag agaaaaaaca aaatttttag atgatttcta
13561 taaggcaggt tttaaaccgc gtgatttatg tgggtgtgtg agttcagcag caaatagttt
13621 aaaaaagttt catgattttt gttttacgga agaaacaaaa aagtatttga atcatttctt
13681 aattgagaaa gaagggttta taccaaaaaa tttatctaag atattgcatg gagcaggagc
13741 taatatttgt tctgctttaa aagattttca tgatgtttgt tttgatgaaa caggaaacaa
13801 aacacagctt ttagatgatt tttatgaggc aggttttagg ccagggtgatt tatctaatat
13861 attatccatg gcaggaaata atgccgcttc tattttaaga aattttcata aatcttgttt
13921 taataaagaa aattatttag atcgcttctt atacgggaaa aaacttttta caccgaaaga
13981 tttatctaaa atattatatg gagtaggaat taatatttgt cctactttta aaaaattgca
14041 tgatctttgt tttgataaag taggaaacat aacaaaatat ttaaacaatc ttatcaaaaa
14101 taaccgcgca aataagatgc ttaatatatt atatgaagaa gttagaaaat ctcttctgc
14161 tttcttggtat gaacagaatg ttagtgaagg agacagaaca actagtgtag gcctcaagcc
14221 gagtagttta cccggtaaaa caaagcaaaa acaagattta gatggtttac aacaaggtga
14281 ttctaaagct aagagaaaac ccaggaaggg tatcactaac cgaagtaaga acggacaaga
14341 tgataaagtt ttagacacag tagcaggtag ctcaagagat ttatcccaga gacgaggaac
14401 aagggaaaaa caatacacgt cagtgtacca taataagaag ggacagttgc gcttatcaaa
14461 atttgtatca ttcattgagc cagtagaaca agggctttat ttaccttcac ttgaagagcg
14521 tggagttaag actgatggta aatgtgtaac aattacacgt ggcttatctc aagctttatt
14581 tttacagagt gacaaatcgt ttttaagtaa tttagaaact tcagttgaaa tttatgagcg
14641 catagctcaa ggtaagcaga tatctgaagg ggaggaaaaga gaagtttttg ctttaagtaa
14701 attacttgat aatttcgaac gacaactaga ttctgttacg aatagtttac cttcaagctc
14761 aattcatact aagggtctaca aaacatctga tgatttatca aattacatag ctggaggtta
14821 gggtgatttt gctattcatt tagtaacaag taatcacgta gttgccattt atagaactgg
14881 tgataactat gcttattttg atagtaatgc agcgtttatt tctgagttta aaactgttga
14941 tcagcttatg aagattgtag aaaaagcagt gaagtttgct ggttataaaa tagaagaaaa
15001 aggttttctt gctgagcact ttgatgttg gaaagctaata aacctactat ctagtgaaga
15061 taaacaaatt ttagcaaaaag aaattaaaac agagcatcaa cttctagcag agcaagataa
15121 ggaacttggt cttattaaga ttaatggtca ggaattatct agagtgcagt tatatgactt
15181 tggaacaaag attaatgtgg aaggtagtgt accgttgctt atcaattctg atatgaattt
15241 aagtagcgaa aaacttcaag accatctaaa taaaaaagaa gtaattatga cagctagaga
15301 atatcttgat agcttgagaa atagcaagaa catagaagaa gtagtacaag caaccaaaag
15361 aattcctttt ataggttcaa aacgtgaaat tgaagaagca gagcaaacac gtaagccgaa
15421 acgatcttta ttagaacaac tagctaaagg agcagttaat tttatggcta gtaatcttac
15481 tactgctttt tttactaatg ttagtcgatt agaaagccaa ctgccagtaa aaacagacaa
15541 tgaacctcaa gcttatttaa atgatccaac tgtggaaaag caactacaaa gatcatatca
15601 gacaatttct tcctgaagtt gtttaatgtc attcacagaa aggccagtg tttcagcgat
15661 cacatctata gggacaccgg ccttgagtga gtttttggct acttcaatat ccctttcttt
15721 gcgaccttcc actctgcctt tttcatggcc gatttggtat ctttctagtc taccttctag
15781 tctaccttct agtctacctt tttg

```

//

```

LOCUS      JAQZAU010000128                16702 bp    dna        linear    ENV 17-MAR-2023
DEFINITION MAG: Wolbachia pipientis isolate wEsol contig_58959, whole genome
            shotgun sequence.
ACCESSION  JAQZAU010000128  JAQZAU010000000
VERSION    JAQZAU010000128.1
DBLINK     BioProject: PRJNA929258
            BioSample: SAMN33142973
KEYWORDS   WGS; ENV; Metagenome Assembled Genome; MAG.
SOURCE     Wolbachia pipientis (insect metagenome)
ORGANISM   Wolbachia pipientis
            Bacteria; Pseudomonadota; Alphaproteobacteria; Rickettsiales;
            Anaplasmataceae; Wolbachieae; Wolbachia.

```

REFERENCE 1 (bases 1 to 16702)  
AUTHORS Fiutek,N., Couger,B.M., Roy,S., de la Torre,J.R. and Connor,E.F.  
TITLE Genomic assessment of the contribution of the Wolbachia endosymbiont of Eurosta solidaginis to gall-induction  
JOURNAL International Journal Molecular Sciences

REFERENCE 2 (bases 1 to 16702)  
AUTHORS Fiutek,N., Couger,B.M., Roy,S., de la Torre,J.R. and Connor,E.F.  
TITLE Direct Submission  
JOURNAL Submitted (10-FEB-2023) Biology, San Francisco State University, 1600 Holloway Ave, San Francisco, CA 94132, USA

COMMENT ##Genome-Assembly-Data-START##  
Assembly Date :: JUN-2019  
Assembly Method :: FLYE v. 06-2019  
Genome Representation :: Full  
Expected Final Version :: Yes  
Genome Coverage :: 100.0x  
Sequencing Technology :: Illumina HiSeq; PacBio Sequel  
##Genome-Assembly-Data-END##

FEATURES  
source Location/Qualifiers  
1..16702  
/organism="Wolbachia pipientis"  
/mol\_type="genomic DNA"  
/submitter\_seqid="contig\_58959"  
/isolate="wEsol"  
/isolation\_source="galls on Solidago altissima"  
/host="Eurosta solidaginis MN-2018-EFC"  
/db\_xref="taxon:955"  
/environmental\_sample  
/country="USA: Cowling Arboretum, Carleton College, Northfield, MN"  
/lat\_lon="44.48 N 93.13 W"  
/altitude="280 m"  
/collection\_date="2018-11"  
/metagenome\_source="insect metagenome"  
/note="metagenomic"

gene <1..68  
/locus\_tag="wEsol\_01493"

CDS <1..68  
/locus\_tag="wEsol\_01493"  
/codon\_start=1  
/transl\_table=11  
/product="hypothetical protein"  
/translation="IRVKLRKSVSKVDRVKENNKV"

gene 87..1430  
/locus\_tag="wEsol\_01494"

CDS 87..1430  
/locus\_tag="wEsol\_01494"  
/codon\_start=1  
/transl\_table=11  
/pfam="DDE\_Tnp\_1"  
/fullproduct="qcoverage 100 , hcoverage 100 , similarity 99.8 , identity 99.8 , evalue 0.0 , alnlength 447 , Bacteria , Proteobacteria , AGJ99681.1 Transposase, IS4 family [Wolbachia endosymbiont of Drosophila simulans wHa]"  
/translation="MRELTMDRIACLSKDLNEFFNEKADEISIAVGFIKRKRKLNGSS FIKAMVFGNIGVDDCSIETMCQLLNEDSIEITKQGLDFRFSEEAVEFMKKMYNEALCL FKKSLQIDCKILQQFGSVKLLDSSYISLPISMEDMYKGYGSSYRDCENNTKSGIKLQL VFDYLNQALDKLNFMEGIRSDQGYRDYLNGLSANDLLIFDLGYFVPSSFQIDEAGAY FVSRYKSDTNIYDIETNQKIELLEYLEGQLSSEKEVLLGKEVKIKVRIICQKLTEEQS

MARRRKANKLAKSHGYTSSQKNQKLLDWSIFITNVPESKINAEQILTIVYRVRWQIELL  
FKLYKSHINLDKLGKTNPFRLCELYAKLCAILVFHGMIGCVKLKKNTELSLTKAFI  
ELKRRVRELFILNINNNLKIFLKKLTIIWSKFSLKDRYRKTRVSTLSSLHSLT"  
/product="Transposase, IS4 family"  
/besthit="qcoverage 100 , hcoverage 100 , similarity 99.8  
, identity 99.8 , evalue 0.0 , alnlength 447 , Bacteria ,  
Proteobacteria , AGJ99681.1 Transposase, IS4 family  
[Wolbachia endosymbiont of Drosophila simulans wHa]"  
gene complement(1467..2186)  
/locus\_tag="wEsol\_01495"  
CDS complement(1467..2186)  
/locus\_tag="wEsol\_01495"  
/codon\_start=1  
/transl\_table=11  
/fullproduct="qcoverage 100 , hcoverage 88.8475836431227  
, similarity 99.6 , identity 99.6 , evalue 1.14e-163 ,  
alnlength 239 , Bacteria , Proteobacteria , ONI56641.1  
rmuC family protein [Wolbachia pipientis wUni]"  
/cog="COG1322 COG1322 448 Predicted nuclease of  
restriction endonuclease-like fold, RmuC family"  
/pfam="RmuC Pfam-B\_595"  
/product="rmuC family protein"  
/translation="MAGMIEYCDFFTQPSVIDKNEDNLLRPDLIIKMPSGKQIIIDAK  
VPLDSYMDAISQNDLQIQKEKLKNHSLAIKKHINDLGKKEYWNQFENTPELVVFLFTG  
EGVFSAALEYEPALIEIGVEKKVIIATPITLIALLRAIAYGWKQEMIAENAKKISELG  
HILYERICTMGENFDNLRRSLKSAVDHYNKTAGSLEARVFPAAAREFNKLGIIHAKNKS  
SAAKELESLSLHTEGLKVD"  
/besthit="qcoverage 100 , hcoverage 88.8475836431227 ,  
similarity 99.6 , identity 99.6 , evalue 1.14e-163 ,  
alnlength 239 , Bacteria , Proteobacteria , ONI56641.1  
rmuC family protein [Wolbachia pipientis wUni]"  
gene complement(2227..2799)  
/locus\_tag="wEsol\_01496"  
CDS complement(2227..2799)  
/locus\_tag="wEsol\_01496"  
/codon\_start=1  
/transl\_table=11  
/product="hypothetical protein"  
/pfam="IncA"  
/translation="MLFNSIALVVSLLLFFYYIIVKKLSEKKANLEGNLCKLEQELQET  
KQTLLTKNEEIVDLRVKRAELEVTLOKEREEKKKEIELLTKAEERLTNTFKALSLDAL  
QTNNNNFLNLAKEVIDSKLKETESDFKKRQATINEVVTPIKEKLEKFDNEIRELEKER  
VGAYEGLKEQIGALMNQTSNLANALRKTSH"  
/besthit="qcoverage 98.4210526315789 , hcoverage  
44.8441247002398 , similarity 100 , identity 100 , evalue  
1.71e-108 , alnlength 187 , Bacteria , Proteobacteria ,  
EAL60074.1 DNA recombination protein RmuC-like, partial  
[Wolbachia endosymbiont of Drosophila simulans]"  
gene complement(3313..3465)  
/locus\_tag="wEsol\_01497"  
CDS complement(3313..3465)  
/locus\_tag="wEsol\_01497"  
/codon\_start=1  
/transl\_table=11  
/fullproduct="qcoverage 100 , hcoverage 100 , similarity  
100 , identity 100 , evalue 6.45e-28 , alnlength 50 ,  
Bacteria , Proteobacteria , WP\_007548649.1 transposase  
[Wolbachia endosymbiont of Drosophila ananassae]"  
/translation="MQENGIKTKLRRRFKNKKQQISNRVVPNTLDQNFTTDQPNKVW  
DYLHKN"

```

        /product="transposase"
        /besthit="qcoverage 100 , hcoverage 100 , similarity 100
        , identity 100 , evalue 6.45e-28 , alnlength 50 ,
        Bacteria , Proteobacteria , WP_007548649.1 transposase
        [Wolbachia endosymbiont of Drosophila ananassae]"
gene      complement(3689..3820)
        /locus_tag="wEsol_01498"
CDS       complement(3689..3820)
        /locus_tag="wEsol_01498"
        /codon_start=1
        /transl_table=11
        /fullproduct="qcoverage 100 , hcoverage 100 , similarity
        100 , identity 100 , evalue 1.06e-21 , alnlength 43 ,
        Bacteria , Proteobacteria , ONI56748.1 hypothetical
        protein N500_0187 [Wolbachia pipientis wUni]"
        /translation="MEKCLEHTHFQAKAPYDKERFDLKKELIRERDILKKALGKEKE"
        /product="hypothetical protein"
        /besthit="qcoverage 100 , hcoverage 100 , similarity 100
        , identity 100 , evalue 1.06e-21 , alnlength 43 ,
        Bacteria , Proteobacteria , ONI56748.1 hypothetical
        protein N500_0187 [Wolbachia pipientis wUni]"
gene      complement(3820..3954)
        /locus_tag="wEsol_01499"
CDS       complement(3820..3954)
        /locus_tag="wEsol_01499"
        /codon_start=1
        /transl_table=11
        /fullproduct="qcoverage 100 , hcoverage 100 , similarity
        100 , identity 100 , evalue 5.41e-20 , alnlength 44 ,
        Bacteria , Proteobacteria , WP_007548354.1 MULTISPECIES:
        IS3 family transposase [Wolbachia]"
        /cog="COG2963 COG2963 116 Transposase and inactivated
        derivatives"
        /pfam="HTH_Tnp_1"
        /product="IS3 family
        transposase"
        /translation="MTNRREYTAEFKLEAVKLVKETGQASTKIAKDLGIDGSMLSKKI
        "
        /besthit="qcoverage 100 , hcoverage 100 , similarity 100
        , identity 100 , evalue 5.41e-20 , alnlength 44 ,
        Bacteria , Proteobacteria , WP_007548354.1 MULTISPECIES:
        IS3 family transposase [Wolbachia]"
gene      complement(4164..5012)
        /locus_tag="wEsol_01500"
CDS       complement(4164..5012)
        /locus_tag="wEsol_01500"
        /codon_start=1
        /transl_table=11
        /fullproduct="qcoverage 97.5177304964539 , hcoverage
        88.9967637540453 , similarity 99.3 , identity 99.3 ,
        evalue 4.78e-179 , alnlength 275 , Bacteria ,
        Proteobacteria , WP_182309210.1 AEC family transporter
        [Wolbachia pipientis]"
        /cog="COG0679 COG0679 311 Predicted permeases"
        /pfam="Mem_trans Mem_trans"
        /product="AEC family transporter"
        /translation="MIETLYLKYSFYIANPIVILYGVSHTEVNLKVISLPILIWFIS
        TMSLSVYYLSSFLFKDNTRNILAFSSGSTSMGYFGLPIAMALFDEDSVSVYVVCYIGM
        ALFENSLGFYIAANGIYTAKECILKLFKLPSLYAMVLGFFLSIYDIQIPTFLTDVMMN
        IRSTFVTLGMVLLGVSIANIASFKIDWKLALITITAKYVFWPLFVLGIVLLDKHVIGI

```

```

YDESIYKALMLLAIIPVSGSSIILANILNYQPKATLLLLLISTAVGLFYVPLIISLFF
TKLVPF"
/besthit="qcoverage 97.5177304964539 , hcoverage
88.9967637540453 , similarity 99.3 , identity 99.3 ,
evaluate 4.78e-179 , alnlength 275 , Bacteria ,
Proteobacteria , WP_182309210.1 AEC family transporter
[Wolbachia pipientis]"
gene 5559..6722
/locus_tag="wEsol_01501"
CDS 5559..6722
/locus_tag="wEsol_01501"
/codon_start=1
/transl_table=11
/fullproduct="qcoverage 100 , hcoverage 100 , similarity
99.7 , identity 99.5 , evaluate 7.50e-259 , alnlength 387 ,
Bacteria , Proteobacteria , WP_174516056.1 multidrug
efflux MFS transporter [Wolbachia endosymbiont of
Cardiocondyla obscurior]"
/pfam="MFS_2 MFS_1 Pfam-B_3877 Sugar_tr MFS_3 MFS_2
MFS_3"
/tigr="TIGR00710 efflux_Bcr_CflA 385 drug resistance
transporter, Bcr/CflA subfamily"
/product="multidrug efflux MFS
transporter"
/translation="MLLPFLLILSLIAKFIEIDISVPSFPDMVHYFNVPEGIIQLTIA
YNFLGFCIGGLFFGPLSECYGRRRIMIIGNTLLLIGAVGCVFAPSIFWLLISRFBVQGI
GVSTSVVFAIVADSYKGDEAVKFIGIMNSVLTVVMAIAPVLGSFINEIVGWRGNYAT
VAILCLISWVLLLLALPETKKDRDIFSLKMMKDYRKLLSNPRFVTLISMSSLFSAAY
MSFITCGPFLYMKTFGLSSTIYALHQGAIVGCFSLISLFFAGKILQKLGAIKCVISGTS
VGAIGSLLLVIIFSIIVPHSFYLVTLSMIIFSIGCAIFQPVIFNASINVFPEIKGTASS
AVSFIRTFIMAIFIGLTSYIYNGQTISVAVLVLSAIVLELVFTVYLLRLKDPM"
/besthit="qcoverage 100 , hcoverage 100 , similarity 99.7
, identity 99.5 , evaluate 7.50e-259 , alnlength 387 ,
Bacteria , Proteobacteria , WP_174516056.1 multidrug
efflux MFS transporter [Wolbachia endosymbiont of
Cardiocondyla obscurior]"
gene complement(6750..7829)
/locus_tag="wEsol_01502"
CDS complement(6750..7829)
/locus_tag="wEsol_01502"
/codon_start=1
/transl_table=11
/fullproduct="qcoverage 100 , hcoverage 100 , similarity
100 , identity 100 , evaluate 1.01e-219 , alnlength 359 ,
Bacteria;Eukaryota , Proteobacteria;Arthropoda ,
WP_007548640.1 MULTISPECIES: peptide chain release factor
1 [Wolbachia]"
/cog="PrfA COG0216 363 Protein chain release factor A"
/pfam="PCRF RF-1"
/tigr="TIGR00019 prfA 361 peptide chain release factor 1"
/product="peptide chain
release factor 1"
/translation="MDMENNQLDLKKKFNDIERNLENPTNLSQKEFITLSKEYSELRP
IIKIIDEYNTLKEEISDLEEIMKDENSEGDIKELAKEEFFEKHKVLLPKIKAKLKLAL
LPKDEDDSRNAILEIRAGTGGEAAALFAAMLFRMYQKYAERNRWKFEPISISNTGIGG
YKEASALINGTEVFARLKFESGVHRVQRPETESSGRLHTSAATVAILPEVEEVDFKI
EEKDLRIDVYRSSGPGGQSVNTTDSAVRVTHLPTGIVVIQQDEKSQHKNAKALKVLR
ARLYEIERQKKEMERSTMRKSQIGSGDRSERIRTYNFPQSRITDHRINLTSHRLEQII
KEGELDEFIEALISRNEAERLAGES"
/besthit="qcoverage 100 , hcoverage 100 , similarity 100

```

```

, identity 100 , evaluate 1.01e-219 , alnlength 359 ,
Bacteria;Eukaryota , Proteobacteria;Arthropoda ,
WP_007548640.1 MULTISPECIES: peptide chain release factor
1 [Wolbachia]"
gene 7928..8521
/locus_tag="wEsol_01503"
CDS 7928..8521
/locus_tag="wEsol_01503"
/codon_start=1
/transl_table=11
/fullproduct="qcoverage 100 , hcoverage 100 , similarity
100 , identity 100 , evaluate 6.76e-135 , alnlength 197 ,
Bacteria , Proteobacteria , WP_010962460.1 MULTISPECIES:
ribosome biogenesis GTP-binding protein YihA/YsxC
[Wolbachia]"
/cog="COG0218 COG0218 200 Predicted GTPase"
/pfam="SRPRB MMR_HSR1 FeoB_N Pfam-B_12884 Dynamin_N
DUF258 Septin Miro Dynamin_N GTP_EFTU"
/tigr="TIGR03598 GTPase_YsxC 186 ribosome biogenesis
GTP-binding protein YsxC"
/product="ribosome
biogenesis GTP-binding protein YihA/YsxC"
/translation="MAKQITSNCNFIFGASDIKSLPNESAPEIAFAGRSNVGKSSLIN
LLINSKKAARVSSKPGCTRQINFYSMYDDKFRLVDLPGYGYSHAGKEEIIQYLNLIIEY
YLIQRENLRVFLIDSKVGLKEIDKDFIYWLIYNNINFNIVLTKIDKVSQKSLGAVI
EDIQKWINNENVSIHQMSIRVKHKITKVRDEFFKFTR"
/besthit="qcoverage 100 , hcoverage 100 , similarity 100
, identity 100 , evaluate 6.76e-135 , alnlength 197 ,
Bacteria , Proteobacteria , WP_010962460.1 MULTISPECIES:
ribosome biogenesis GTP-binding protein YihA/YsxC
[Wolbachia]"
gene 8496..9437
/locus_tag="wEsol_01504"
CDS 8496..9437
/locus_tag="wEsol_01504"
/codon_start=1
/transl_table=11
/fullproduct="qcoverage 100 , hcoverage 100 , similarity
99.7 , identity 98.7 , evaluate 2.45e-213 , alnlength 313 ,
Bacteria , Proteobacteria , WP_022626233.1 MULTISPECIES:
acetylglutamate kinase [Wolbachia]"
/cog="ArgB COG0548 265 Acetylglutamate kinase"
/pfam="AA_kinase"
/tigr="TIGR00761 argB 231 acetylglutamate kinase"
/product="acetylglutamate
kinase"
/translation="MSFSSLQDKKMSSEFLKGEVSFEQKAEILLEVLNIPSFVGET
FVIKCGGTIILNETLFNTFVHNVLKQLGINPVIIHEGEYEINSVLKMLDMNSKFVN
GIRLTDKDTMKIIEMALCGSVNKKIVQHINSAGGSAIGLCGKDGNLIAEKITATLRE
DRSNNIEKILDMGFIGRPTIEINPDILFFIEESDFIPVIAPIGHGKDGETYHIDADSTA
SAIAIAVSASKMIILSDTDEEIDKIGGRKISVKNLNASIDCGKIKGEKFIERLMAYVK
MAEECAGVVHIVDGRIPNIMLDLFTESNSSISIVSDL"
/besthit="qcoverage 100 , hcoverage 100 , similarity 99.7
, identity 98.7 , evaluate 2.45e-213 , alnlength 313 ,
Bacteria , Proteobacteria , WP_022626233.1 MULTISPECIES:
acetylglutamate kinase [Wolbachia]"
gene 9852..10313
/locus_tag="wEsol_01505"
CDS 9852..10313
/locus_tag="wEsol_01505"

```

```

/codon_start=1
/transl_table=11
/fullproduct="qcoverage 100 , hcoverage 100 , similarity
100 , identity 100 , evaluate 8.81e-105 , alnlength 153 ,
Bacteria , Proteobacteria , WP_006279458.1 MULTISPECIES:
dUTP diphosphatase [Wolbachia]"
/cog="Dut COG0756 148 dUTPase"
/pfam="dUTPase"
/tigr="TIGR00576 dut 143 dUTP diphosphatase"
/product="dUTP
diphosphatase"
/translation="MQRSKIKVEIKRLSHGEDLSLPCYATTQSAGMDLYAALNDSAVL
NPLERLLVPTGIVIAIPNGFEGQIRPRSGLAAKHGITVLNSPGTIDSDYRGEVKICLI
NLSNQPYEIKRGDRIAQILISPVSQVIWDDREEFCAEETGRNAGGFGSSGR"
/besthit="qcoverage 100 , hcoverage 100 , similarity 100
, identity 100 , evaluate 8.81e-105 , alnlength 153 ,
Bacteria , Proteobacteria , WP_006279458.1 MULTISPECIES:
dUTP diphosphatase [Wolbachia]"
gene 10392..11009
/locus_tag="wEsol_01506"
CDS 10392..11009
/locus_tag="wEsol_01506"
/codon_start=1
/transl_table=11
/fullproduct="qcoverage 100 , hcoverage 98.0861244019139
, similarity 100 , identity 100 , evaluate 1.56e-138 ,
alnlength 205 , Bacteria , Proteobacteria ,
WP_155969116.1 MULTISPECIES: hypothetical protein
[Wolbachia]"
/translation="MLTFKNHCGQLHKANTVFVAFTAIYVIGGLAILSTPLWRPSTCK
LAAFAATPLGMGVLAFAVAAALTYLAIFYAISKNNEISELKALKVIKDGLLVTKDAFREI
ARNNQVKDEEGKVEKDKYYIDFSLEGKNYRIIVDINQLTSILGNTLLFKIGSLKEKND
EGKFEAVNETKWNKTLGLDKDGAKEVNTYLGSPIVEQAAKGKVPD"
/product="hypothetical protein"
/besthit="qcoverage 100 , hcoverage 98.0861244019139 ,
similarity 100 , identity 100 , evaluate 1.56e-138 ,
alnlength 205 , Bacteria , Proteobacteria ,
WP_155969116.1 MULTISPECIES: hypothetical protein
[Wolbachia]"
gene complement(11239..11646)
/locus_tag="wEsol_01507"
CDS complement(11239..11646)
/locus_tag="wEsol_01507"
/codon_start=1
/transl_table=11
/pfam="DDE_Tnp_1_2"
/fullproduct="qcoverage 100 , hcoverage 100 , similarity
100 , identity 100 , evaluate 9.23e-96 , alnlength 135 ,
Bacteria , Proteobacteria , WP_174516160.1 MULTISPECIES:
transposase [unclassified Wolbachia]"
/translation="MLKEVDFQHAIKALYADRACDRHKFYKLCNEYDIKTKIPPINNA
AEHPEIDYMSDRNAAIRLIKLYGEDGMKEWKKEVNYGKRSYIEGFFSRLKQIFGFSFR
NKSEINREKELLIKCYLLNKFTDIGMAKFEIVT"
/product="transposase"
/besthit="qcoverage 100 , hcoverage 100 , similarity 100
, identity 100 , evaluate 9.23e-96 , alnlength 135 ,
Bacteria , Proteobacteria , WP_174516160.1 MULTISPECIES:
transposase [unclassified Wolbachia]"
gene complement(11769..11858)
/locus_tag="wEsol_01508"

```

CDS complement(11769..11858)  
 /locus\_tag="wEsol\_01508"  
 /codon\_start=1  
 /transl\_table=11  
 /fullproduct="qcoverage 100 , hcoverage 100 , similarity 100 , identity 100 , evalue 1.28e-10 , alnlength 29 , Bacteria , Proteobacteria , CDR78750.1 hypothetical protein WPAU\_0359 [Wolbachia endosymbiont of Drosophila simulans wAu]"  
 /translation="MIAENNMEDIEIAIDSTGISIYNNTQQGK"  
 /product="hypothetical protein"  
 /besthit="qcoverage 100 , hcoverage 100 , similarity 100 , identity 100 , evalue 1.28e-10 , alnlength 29 , Bacteria , Proteobacteria , CDR78750.1 hypothetical protein WPAU\_0359 [Wolbachia endosymbiont of Drosophila simulans wAu]"

gene complement(11842..12171)  
 /locus\_tag="wEsol\_01509"

CDS complement(11842..12171)  
 /locus\_tag="wEsol\_01509"  
 /codon\_start=1  
 /transl\_table=11  
 /pfam="DDE\_Tnp\_1\_5"  
 /fullproduct="qcoverage 100 , hcoverage 100 , similarity 100 , identity 100 , evalue 4.31e-75 , alnlength 109 , Bacteria , Proteobacteria , WP\_141456678.1 MULTISPECIES: transposase [unclassified Wolbachia]"  
 /translation="MPQKMRVSNCHYEYKFLQERGSIFCYINDAIENWYENC PKMQGG NYIYSDKVILVHIIVSFFRIGLRQTVGFIKGYLQQIGRDLAVISYSQASRRFKKLN I KINDCRK"  
 /product="transposase"  
 /besthit="qcoverage 100 , hcoverage 100 , similarity 100 , identity 100 , evalue 4.31e-75 , alnlength 109 , Bacteria , Proteobacteria , WP\_141456678.1 MULTISPECIES: transposase [unclassified Wolbachia]"

gene complement(12391..12720)  
 /locus\_tag="wEsol\_01510"

CDS complement(12391..12720)  
 /locus\_tag="wEsol\_01510"  
 /codon\_start=1  
 /transl\_table=11  
 /product="transcription antitermination factor NusB"  
 /pfam="NusB"  
 /tigr="TIGR01951 nusB 131 transcription antitermination factor NusB"  
 /translation="MKDIFEC EEFEHQFLENLLYKVIKSSEEYDKIIESYLHPSWSLS RLNLISLSILRVAICELANCDTPVPVINEYTNIASDLLDKPSEIGFINGLLDKAKDA VKLNKNP"  
 /cog="NusB COG0781 151 Transcription termination factor"  
 /besthit="qcoverage 100 , hcoverage 68.125 , similarity 100 , identity 99.1 , evalue 6.11e-70 , alnlength 109 , Bacteria , Proteobacteria , WP\_065094707.1 MULTISPECIES: transcription antitermination factor NusB [unclassified Wolbachia]"

gene complement(12743..12874)  
 /locus\_tag="wEsol\_01511"

CDS complement(12743..12874)  
 /locus\_tag="wEsol\_01511"  
 /codon\_start=1  
 /transl\_table=11

```

        /product="hypothetical protein"
        /translation="MEEKPVDDKKWRIKRSTARFLAVQIAYSNIFVGYNKSTFKLGKL"
        /besthit="qcoverage 95.3488372093023 , hcoverage 25.625 ,
        similarity 100 , identity 100 , evalue 5.06e-19 ,
        alnlength 41 , Bacteria , Proteobacteria , WP_015588872.1
        MULTISPECIES: transcription antitermination factor NusB
        [unclassified Wolbachia]"
gene      complement(12874..13302)
        /locus_tag="wEsol_01512"
CDS       complement(12874..13302)
        /locus_tag="wEsol_01512"
        /codon_start=1
        /transl_table=11
        /fullproduct="qcoverage 100 , hcoverage 100 , similarity
        100 , identity 100 , evalue 5.45e-96 , alnlength 142 ,
        Bacteria , Proteobacteria , WP_006279647.1 MULTISPECIES:
        6,7-dimethyl-8-ribityllumazine synthase [Wolbachia]"
        /cog="RibH COG0054 152 Riboflavin synthase beta-chain"
        /pfam="DMRL_synthase"
        /tigr="TIGR00114 lumazine-synth 138
        6,7-dimethyl-8-ribityllumazine synthase"
        /product="
        6,7-dimethyl-8-ribityllumazine synthase"
        /translation="MSRILIVNSIYYTEIANLLLEGAIIDKLKGSNASYDVVEVPGTFE
        IPATILFAVKSIGHTNYDGYLALGCVIRGETDHYQYVCKGVIEGLNEVVMHYAIPGLMG
        VITADSKDKALVRADKNKKNVGGHAASVLRMIDLHNKLLK"
        /besthit="qcoverage 100 , hcoverage 100 , similarity 100
        , identity 100 , evalue 5.45e-96 , alnlength 142 ,
        Bacteria , Proteobacteria , WP_006279647.1 MULTISPECIES:
        6,7-dimethyl-8-ribityllumazine synthase [Wolbachia]"
gene      complement(13280..14980)
        /locus_tag="wEsol_01513"
CDS       complement(13280..14980)
        /locus_tag="wEsol_01513"
        /codon_start=1
        /transl_table=11
        /pfam="Pfam-B_16160 60KD_IMP"
        /fullproduct="qcoverage 100.530035335689 , hcoverage 100
        , similarity 98.6 , identity 98.1 , evalue 0.0 ,
        alnlength 569 , Bacteria , Proteobacteria ,
        WP_015588874.1 MULTISPECIES: membrane protein insertase
        YidC [unclassified Wolbachia]"
        /translation="MSEAKSLILAAILSMLIMVSWRIIYDNFFSTNQNPPLIEHIESF
        NDLAPIIYQNRSEIINSTREQRVSLTNMIKGSISLKGARFDDLILTNHLEPNSSSP
        QVVLSPAESKDVYFAEFGWLDPNKNIKVPDSKAVWQAEKLNQKEVNLFWDNENGIVF
        KMKISLDDNYMFKIEQIVENNTKDNVVLVPYGKINRKRDNINESYWISHEGVLGAFDN
        KLEEWYKDISKKHLIKANTSEKNWFGFADKYWLTAIPEKSDKINVSIKHTNVNNTD
        KFQVDFVKPYKSILPGASVSNVNYFFAGAKKLNLLDSYKDTLNIPLFDKAVDFGVLYF
        ITKPVFLLLEYFNFVLKNFGLAILLLTLVIKLLMLSLSNRSYISMFKVKSLQPELTRI
        KELYKNDSLKQHKETIALFKRNNVNPMSIFPMLIQIPVFFALYKVLFTIEMRHAPF
        FLWIKDLSAPDPTNIFTLFGFLFNYNFPISIGILPIIFGATMIIQQKLSEKDQTSKDDI
        QVNVMMKFLPYISVFIFSSFPAGLVIYWIFSNIITLIQQSLIKLFLTKKVVNVENTNS
        "
        /product="membrane protein
        insertase YidC"
        /besthit="qcoverage 100.530035335689 , hcoverage 100 ,
        similarity 98.6 , identity 98.1 , evalue 0.0 , alnlength
        569 , Bacteria , Proteobacteria , WP_015588874.1
        MULTISPECIES: membrane protein insertase YidC
        [unclassified Wolbachia]"

```

```

gene      15115..15618
          /locus_tag="wEsol_01514"
CDS       15115..15618
          /locus_tag="wEsol_01514"
          /codon_start=1
          /transl_table=11
          /fullproduct="qcoverage 100 , hcoverage 100 , similarity
100 , identity 100 , evaluate 1.04e-112 , alnlength 167 ,
Bacteria , Proteobacteria , WP_015588875.1 MULTISPECIES:
TIGR02281 family clan AA aspartic protease [Wolbachia]"
          /cog="COG3577 COG3577 215 Predicted aspartyl protease"
          /pfam="gag-asp_proteas Pfam-B_2545 Asp_protease
Asp_protease_2 RVP Pfam-B_12883 RVP_2"
          /tigr="TIGR02281 clan_AA_DTGA 121 clan AA aspartic
protease, TIGR02281 family"
          /product="TIGR02281 family
clan AA aspartic protease"
          /translation="MNAVKNLVIWLLIIATTAMLIDSQRDKLSDRFLSTFLPYKGRIQ
NSGSIEFTKSYDGHFYIQAQVNSNITFLDGTGATDIVLSQKDALHAGINLQNVQDFK
IYETAKGQIKAGVVQIPQVKIGNFLINDVQASVNTSHSMHSLLGMSFLRYFHFTIRDN
KLILYRD"
          /besthit="qcoverage 100 , hcoverage 100 , similarity 100
, identity 100 , evaluate 1.04e-112 , alnlength 167 ,
Bacteria , Proteobacteria , WP_015588875.1 MULTISPECIES:
TIGR02281 family clan AA aspartic protease [Wolbachia]"
gene      complement(15625..16500)
          /locus_tag="wEsol_01515"
CDS       complement(15625..16500)
          /locus_tag="wEsol_01515"
          /codon_start=1
          /transl_table=11
          /fullproduct="qcoverage 100 , hcoverage 100 , similarity
100 , identity 100 , evaluate 1.09e-189 , alnlength 291 ,
Bacteria , Proteobacteria , WP_141456869.1 MULTISPECIES:
protein translocase subunit SecF [unclassified
Wolbachia]"
          /cog="SecF COG0341 305 Preprotein translocase subunit
SecF"
          /pfam="Sec_GG SecD_SecF ACR_tran Sterol-sensing"
          /tigr="TIGR00966 3a0501s07 246 protein-export membrane
protein SecF"
          /product="protein
translocase subunit SecF"
          /translation="MALRLIPDNLDIKFSKYRDLTALISIVLIIFSIFTVVLRGVNLG
IDFAGGILIEIKSSDENHSILDALKENGFTVQSSKAGDNLVMRFKDEGDEDKIKKIKS
ILEEKLGSISYRKIDYVGPQISSTQIFEGMLSMLIAIVGIFFYVWFRFNWQC GFSGI
TALIHVDVILTVGFISLTGIEFNISVAALLTVIGYSINNSVIIYDRIREYRRSGKSGR
MSEVVVDASINTTLFRTILTSGTTLLAALPLVLICTDAVRDFSLIIFFGILIGTCSAIF
ISAPILTYRALISRL"
          /besthit="qcoverage 100 , hcoverage 100 , similarity 100
, identity 100 , evaluate 1.09e-189 , alnlength 291 ,
Bacteria , Proteobacteria , WP_141456869.1 MULTISPECIES:
protein translocase subunit SecF [unclassified
Wolbachia]"

```

#### ORIGIN

```

1  ccatacgcggt caagttaagg aaaagtgtaa gtaaagttga tagagtgaag gaaaataata
61 aggtataaat tctcttggt ataatgaatga gagaacttac aatggacaga atagcttgct
121 tatcaaaaga cctcaatgaa ttctttaatg aaaaagcaga cgaaatatca attgcagtag
181 gttttataaa aagaaagaga aaacttaatg gctcatcatt cataaaagct atgggttttg
241 gtaacatagg agttgatgat tgcagcatag aaacaatgtg ccaattgcta aatgaagact

```

|      |              |             |             |             |             |             |
|------|--------------|-------------|-------------|-------------|-------------|-------------|
| 301  | cgatagaaat   | tacaaaacag  | ggtttagatt  | ttaggtttag  | tgaagaagca  | gttgagttca  |
| 361  | tgaaaaaaat   | gtataacgaa  | gctttgtgtt  | tatttaaaaa  | aagtctacag  | attgattgca  |
| 421  | aaatttttaca  | gcaatttgga  | agcgttaaat  | tattggatag  | cagctacatt  | agcctgcccc  |
| 481  | ttagcatgga   | agatatgtac  | aaaggatatg  | gcagtagcta  | tagagattgt  | gagaataata  |
| 541  | ccaaatcagg   | aataaagcta  | cagtttagtct | ttgattacct  | gaatcaagcg  | ctagataagt  |
| 601  | taaatttttat  | ggaaggaata  | aggtcggatc  | aaggttatag  | ggattatctg  | aacggttttat |
| 661  | cagccaatga   | tttgctaata  | tttgacttgg  | gctactttgt  | gcctagtctt  | tttaaacaga  |
| 721  | ttgatgaagc   | aggtgcatat  | tttgttagtc  | gttataagtc  | tgataaccaat | atatatgata  |
| 781  | tagaaacaaa   | tcaaaaaata  | gagctattgg  | agtattttgga | aggtcaatta  | tcttcagaaa  |
| 841  | aagaagtatt   | attaggaaaag | gaagtaaaaa  | ttaaggtaag  | aattatatgt  | caaaagctaa  |
| 901  | ctgaagaaca   | gtctatggct  | agaagaagaa  | aggctaataa  | attagcaaag  | tcacatggat  |
| 961  | atacatcttc   | tcaaaagaat  | caaaagttat  | tagattggtc  | aatatttata  | actaatgttc  |
| 1021 | cagagagtaa   | aattaatgct  | gaacaaatat  | tgacggttta  | tagagtaaga  | tggcaaatcg  |
| 1081 | aattactatt   | taaactatat  | aaaagtcata  | tcaatcttga  | taaactaaaa  | ggaaagacaa  |
| 1141 | atccattttag  | agtattgtgc  | gagctatacg  | caaaattatg  | tgctattctc  | gtatttcacg  |
| 1201 | gaatgattgg   | ctgtgtaaaa  | ctaaaaaaga  | acacggagct  | cagttttaaca | aaggcattta  |
| 1261 | ttgaattgaa   | aaggcggtt   | agagagctct  | ttttgatatt  | aaacaatatt  | gtcaataatt  |
| 1321 | taaaaatfff   | tctaaaaaag  | cttactataa  | tctggtcaaa  | gttttctttg  | aaagacagat  |
| 1381 | ataggaagac   | cagggtatct  | actttaagct  | ctctacattc  | cttaacttga  | cgcgtatggg  |
| 1441 | tttttgaaca   | ttccctgtta  | agatgcctaa  | tctactttca  | gccccctcagt | atgtaaactg  |
| 1501 | cgtggtaaaag  | actctaattc  | ctttgcagca  | cttaaacttt  | tatttttttgc | atgtatacca  |
| 1561 | agcttattga   | attctcgagc  | agcaggaaac  | acccttgctt  | caagagagcc  | agcagtttta  |
| 1621 | ttataatgat   | caacagcact  | ttttaagctc  | ctgcgcaaat  | tatcaaagtt  | ttcaccatt   |
| 1681 | gtgcaaatgc   | gctcatataa  | aatatgacct  | agttcactga  | ttttctttgc  | gttttcagct  |
| 1741 | atcatctctt   | gcttccatcc  | atacgctatt  | gctctcagca  | acgcaattag  | agtgatcggg  |
| 1801 | gttgcaatga   | tcactttttt  | ttccactcca  | atctctatca  | aagcaggctc  | atattccagt  |
| 1861 | gctgcgctaa   | aaacccctc   | ccctgttaag  | aaaagcacca  | caagttctgg  | cgtattttca  |
| 1921 | aattgattcc   | aatactcttt  | tttacccaag  | tcatttatgt  | gtttttttat  | tgccagggaa  |
| 1981 | tggttcttta   | atftctcctt  | ttgtatttgc  | aatcattttt  | gtgatatagc  | atccatgtaa  |
| 2041 | gaatcaagcg   | gcacttttagc | atctattatt  | atftgctttc  | cagatggcat  | tttgattatt  |
| 2101 | aatcaggac    | gcaataaatt  | atcctcgttt  | ttatcaatca  | ctgacggctg  | agtaaaaaaa  |
| 2161 | tcgcaatact   | caatcattcc  | tgccattttct | accactcttt  | tgagttgcat  | ttcaccat    |
| 2221 | ttgcccctaa   | tgtgaggttt  | tcctcagggc  | attagcaagg  | ttggaagttt  | ggttcatcag  |
| 2281 | cgctccaatt   | tgctccttta  | aaccttcata  | ggccccctacc | ctctcctttt  | ctagctcacg  |
| 2341 | tattttcatta  | tcgaatfttt  | ctaatttttt  | ttttattgga  | gttacaactt  | cgttgatcgt  |
| 2401 | tgcttgtctt   | tttttgaaat  | cgctttccgt  | ttcttttaaat | ttactatcga  | ttacttcctt  |
| 2461 | tgctaagtcc   | agaaaaattat | tgftatttgg  | ttgcaaagca  | tcaagagaga  | gcgcttttaa  |
| 2521 | agtgtttgtt   | aatctctcct  | ctgcttttgg  | tagtaattct  | atftcctttt  | tcttttcctc  |
| 2581 | acgttctttt   | tgcagagtta  | cttcaagttc  | tgctcttttg  | acccttaaat  | caactatttc  |
| 2641 | ttcattcttc   | gtaagcaaaag | tttgctttgt  | ttcttgaagt  | tcttgctcta  | atftacataa  |
| 2701 | attaccctca   | aggtttgctt  | tcttttcgct  | cagttttttt  | acgataatgt  | agaaaaatag  |
| 2761 | taatagagag   | acaaccagag  | ctatagaatt  | gaaaagcatc  | agaataaaaa  | agctgtatft  |
| 2821 | acaattctat   | atgattttttg | tgtgtataag  | aaagaaaaaa  | ggagcaccta  | aagagggtgac |
| 2881 | cttaccacga   | aaaagtagag  | agaaagttaa  | gacgttttta  | tcatgagaat  | aaattgtgca  |
| 2941 | ggaatgcaat   | agttaatatgt | agaatgtcta  | cgftatttgg  | tataaaagat  | ttctatgtat  |
| 3001 | tcaaatatgg   | cagttctggg  | ttggttagcg  | agaagtatca  | ataagcagct  | cccttttaag  |
| 3061 | tgaacttttc   | tgcaacagag  | ttatcgtaac  | aacagccctt  | atggctcatg  | ctggaaatga  |
| 3121 | tgftttttgt   | attcaataga  | aattggtaat  | tttgagagggt | atactgtgac  | ccttgatcgc  |
| 3181 | tatgtaacag   | cagatttttta | tcgggtttgc  | gtttatcaac  | ggccatcaat  | aaagaatcta  |
| 3241 | taactaatta   | tcatgttact  | cattaaccac  | catgcgtgaa  | tatagggtcaa | ttattgccgc  |
| 3301 | caacaacctt   | cttttagtttt | tatgtaggta  | atcccaaact  | ttatttgggt  | gatcagtagt  |
| 3361 | aaaatftttga  | tccaatgtgt  | tcggagccac  | aactcggttg  | cttatttggct | gttttttatt  |
| 3421 | tttgaacctt   | cgtctaagct  | tggttttaaat | gccattttct  | tgcataacac  | tttgtaactgt |
| 3481 | tttaatftttt  | gcctaaagct  | tttaattcag  | cgtgaatftt  | aggggctcca  | tatctgcatt  |
| 3541 | tagaatgctt   | gatgtatfttt | ttgaatatct  | gctagaagcc  | cttctttttgc | taattcttta  |
| 3601 | ctgctfttttt  | ccttagcaac  | caataaccac  | agtacaaaac  | cctacatagt  | tcctgtgttt  |
| 3661 | tatagcaatt   | tctatataaaa | agaataactft | actctfttttc | tttgcccagg  | gctftttttta |
| 3721 | agatgtctct   | ttctcttatt  | agctctftttt | ttagatcaaaa | tctfttctttg | tcataaggag  |
| 3781 | cctfttgccctg | gaaatgcgta  | tgctccagac  | atfttttccat | catatftttct | tacttaacat  |
| 3841 | actgccatct   | atacctagat  | ctftttgctat | ttttgtactt  | gcttgacctg  | tttctfttaac |

|      |             |             |             |             |             |             |
|------|-------------|-------------|-------------|-------------|-------------|-------------|
| 3901 | cagcttaaca  | gcttctaatt  | tgaattctgc  | tgtatattct  | cttctatttg  | tcataatttg  |
| 3961 | aaaaaacgtt  | ttattttact  | ccaaaaacgt  | cttaactttc  | tctctacttt  | ttctgggtaa  |
| 4021 | ggtcaattta  | ccgccgcggc  | gctaactagt  | agcgggatga  | cgggttacca  | aattgtagaa  |
| 4081 | gttgcttttag | ctataaattc  | aagttttatc  | aatgtcttgt  | gttgttaccc  | aaataatggg  |
| 4141 | tgtgcaagcg  | cttaattttt  | tgatcaaaaa  | ggaacaagtt  | tagtaaaaaa  | taatgatatt  |
| 4201 | attagtggaa  | cataaaacag  | tcccactgca  | gtactgatta  | gaagcaacag  | agtagcttta  |
| 4261 | tctgggttgat | aattcaaaaat | attagcaagt  | attatactgg  | acccagaaac  | tggaataata  |
| 4321 | gccagcaaca  | tcagtgcctt  | atatatgctc  | tcatcgtata  | tacctataac  | atgcttgctc  |
| 4381 | aaaaggacaa  | ttcctaaaaac | aaacagtggc  | cagaatacgt  | actttgctgt  | aatagtgatc  |
| 4441 | aaagcaagct  | tccaatctat  | tttaaagctt  | gcaatattcg  | caatgctcac  | tccaagtagc  |
| 4501 | accattccta  | atgtgacaaa  | tgtacttcta  | atgttcatca  | taacatctgt  | taaaaaagta  |
| 4561 | ggtattttgta | tatcgtatat  | acttaaaaaag | aagcccagaa  | ccatcgcata  | aagcgaagga  |
| 4621 | agtttgaaca  | actttaatat  | gcattctttt  | gcggtataaa  | taccattttgc | agctatgtaa  |
| 4681 | aatcctaagc  | tgttttcaaa  | tagcgccatt  | cctatataac  | aaacaacata  | tacagatact  |
| 4741 | gaatcttcat  | caaataaagc  | catggcaatc  | ggcaggccaa  | aataacccat  | acttgtgctg  |
| 4801 | cccagactaa  | atgctaatat  | gtttcttgtg  | ttatccttaa  | ataaaaaaga  | agaaagataa  |
| 4861 | tacactgata  | aggacatagt  | gctacctata  | aaccatatca  | aaatcggcag  | agaaattact  |
| 4921 | tttaagttaa  | cttctgtatg  | agagactcca  | tataaaatca  | ctattggatt  | agctatataa  |
| 4981 | aaagagtatt  | tgagatatag  | tgtttctatc  | aatttttaaga | tattttcctg  | ctaagtaacc  |
| 5041 | aataaatatt  | gtaatatataa | taggtaatat  | tttgaggaaa  | agagtaagga  | acatactagc  |
| 5101 | ctattgtaat  | atttttgatt  | gataaagtga  | cattagatct  | taagggtgtg  | taaaagtaaa  |
| 5161 | caaaatttat  | tttccaattt  | atccagctca  | tagttaatta  | cattagtgcc  | aaaattcgtt  |
| 5221 | tttatatagg  | acttaagaat  | gacattttta  | tgataaaatt  | atgttaagtt  | tctataaagc  |
| 5281 | ttcttgcata  | tttttaaata  | atgacatatt  | tactaaaaat  | taaactgctt  | gtagtaattt  |
| 5341 | agacgaactg  | ttgaaaaagt  | aagaggaaat  | aagtaaagtt  | agggcagaga  | ggtaagagct  |
| 5401 | ttaacatagt  | tgtcatattt  | ttctttaatt  | aaccctagtg  | tccaatttat  | ccaccattcc  |
| 5461 | ttcacatgag  | gtggtttctaa | ccatttttaat | aacagtaaaa  | aatgttttct  | ttcaacgctt  |
| 5521 | taaatgtgat  | atttttattc  | attaattaaa  | aatctcaaat  | gttactacca  | tttctgttaa  |
| 5581 | tcctgtctct  | aattgctaag  | ttcattgaaa  | ttgacatttc  | cgtacctagt  | tttcctgata  |
| 5641 | tggtgcacta  | ttttaacgta  | ccggaaggca  | taattcaatt  | aactattgct  | tataatttcc  |
| 5701 | taggcttttg  | cataggaggg  | ttgttttttg  | gtccattgtc  | tgaatgctat  | ggcagaagga  |
| 5761 | gaattatgat  | cataggtaac  | actttgttat  | taatcggcgc  | tgttgggtgt  | gtttttgcac  |
| 5821 | cgtcgatttt  | ttggctttta  | atctctcgct  | ttgttcaggg  | cattgggtgt  | agcacatctg  |
| 5881 | tagttgtggt  | tgcaatcggt  | gcagacagct  | acaaaggcga  | cgaagcgggtg | aaattttattg |
| 5941 | gaatcatgaa  | ttctgttctt  | acagttgtca  | tggaatttgc  | gccagtgtta  | ggcagtttca  |
| 6001 | tcaatgaaat  | tgtaggatgg  | cgtggtaatt  | atgcaactgt  | tgcaataactt | tgtttaattct |
| 6061 | cttgggtttt  | gctgctttta  | gcgttaccag  | aaacaaaaaa  | ggaccgcgat  | attttccagtt |
| 6121 | tgaaaaaaat  | gatgaaagat  | tacagaaaaac | tactatctaa  | tccgagggtt  | gttacgttgt  |
| 6181 | ctttgatgtc  | aagcctcttt  | tctgctgcgt  | atatgtcatt  | cattacttgt  | ggaccttttc  |
| 6241 | tgtatatgaa  | gacttttggt  | ttatctagca  | ctattttatgc | actacatcaa  | ggtgcaatag  |
| 6301 | ttgggtgctt  | ctcactcatc  | agtctatttg  | ctggcaaaat  | cttgcaaaaa  | cttggaagcaa |
| 6361 | taaagtgtgt  | aattttctggt | acgagcgtgg  | gtgctatttg  | gtctctattg  | cttgtaatat  |
| 6421 | tcagtataat  | tgtaccccac  | tctttctact  | tagtaacact  | gtctatgatt  | attttttcta  |
| 6481 | tcggttgctg  | aattttccag  | ccagtgattt  | ttaatgcatc  | aataaatggt  | ttccctgaaa  |
| 6541 | ttaaaggcac  | agcttcttct  | gcagtctcgt  | tcattagaac  | ttttatcatg  | gctattttta  |
| 6601 | tcggcttaac  | aagctacatt  | tacaatggtc  | aaacaattag  | tgtagctggt  | cttgttttat  |
| 6661 | ccgcgatagt  | actagaactt  | gtttttactg  | tctatctatt  | gcgtttaaaa  | gacacctatg  |
| 6721 | aattaataaa  | gatattccat  | tgtaggctgc  | taactttccc  | ctgccaatct  | ttctgcttca  |
| 6781 | ttacgtgaga  | ttaatgcctc  | aataaattca  | tctagtctgc  | cttcttttat  | aatctgctct  |
| 6841 | agccgatgtg  | aagttagatt  | aattctgtgg  | tctgttattc  | ttgattgtgg  | gaaattatat  |
| 6901 | gttcttatgc  | gctcggaacg  | atcaccagag  | ccaatctgac  | ttttcctcat  | tggtgacctt  |
| 6961 | tccattttct  | ttttttgtct  | ttcaatttcg  | tatagccttg  | ccctcaatac  | tttgagcgct  |
| 7021 | ttagctttat  | ttttatgctg  | cgatttttca  | tcttgctgta  | tcacaactat  | ccctgttggc  |
| 7081 | aagtgggtga  | cccttactgc  | actatcgggt  | gtatttactg  | attgccctcc  | aggaccactg  |
| 7141 | gatctataaa  | catctattcg  | taagtctttt  | tcttctattt  | taaagtcaac  | ttcttctact  |
| 7201 | tcaggtaata  | tcgcaacagt  | agcggcagag  | gtatgcaacc  | ttcctgaaga  | ttcagtttct  |
| 7261 | ggcactctct  | gtactctgtg  | cacccctgat  | tcaaatttca  | accttgcaaa  | aacttctggt  |
| 7321 | ccattaatga  | gtgcagaagc  | ttccttatag  | ccacctatac  | ctgtattaga  | aatgcttatt  |
| 7381 | ggctcgaact  | tccaattttct | tctttctgca  | tatttttgat  | acatacgaaa  | taacattgct  |
| 7441 | gcaaaataatg | ctgcttcttc  | tccgcctgtg  | cctgctctaa  | tttctaatat  | tgcattcctt  |

|       |              |             |             |             |             |             |
|-------|--------------|-------------|-------------|-------------|-------------|-------------|
| 7501  | gagtcacatctt | catcttttggg | caataatgct  | aactttaatt  | ttgcttttat  | ttttggtaat  |
| 7561  | aataccttgt   | gcttttcgaa  | gaattcttct  | tttgctaact  | cttttatatc  | accttcgctg  |
| 7621  | ttttcatctt   | tcattatttc  | ttctaagtct  | gaaatttcct  | ctttcagcgt  | gttatattca  |
| 7681  | tcaattatct   | tgattattgg  | cctgagctca  | gagtatctct  | ttgaaagggg  | aatgaattct  |
| 7741  | ttttgactta   | aattggtagg  | attttccaaa  | ttcctctcta  | tatcattaaa  | ttttttcttt  |
| 7801  | aagtcttgta   | aattattttc  | catatccata  | tagcacagat  | ctagctaagt  | aatatatact  |
| 7861  | gaaataaaaa   | atttcttata  | tcaagcaata  | acactataat  | atacctacta  | ccttctagtt  |
| 7921  | gaatataatg   | gcaaaacaga  | taacatcaaa  | ctgcaatttc  | atatttggag  | cttcggacat  |
| 7981  | aaaatcatta   | ccaaatgagt  | cggctccaga  | gattgcggtt  | gctggtagat  | caaagttagg  |
| 8041  | aaaatccagt   | ctgatcaact  | tactgataaa  | cagcaaaaaa  | gctgccagag  | tttctcttaa  |
| 8101  | acctggatgc   | actagacaaa  | taaattttta  | ctctatgtac  | gatgataagt  | tcagacttgt  |
| 8161  | tgatctacca   | gggtatggct  | actctcatgc  | aggcaaggag  | gaaattatac  | aatatttaaa  |
| 8221  | cttaattgag   | tattatctaa  | ttcaaagaga  | aaatctaaga  | agagtgtttg  | tggtgataga  |
| 8281  | tagcaaggta   | ggattaaaag  | aaatagacaa  | agacttcatt  | tattggttaa  | tatataataa  |
| 8341  | cattaacttt   | aacattgtgc  | taacaaaaat  | agataaaagta | agtcaaaaaa  | gcttaggtgc  |
| 8401  | tgttatagaa   | gatattcaaa  | aatggattaa  | taatgagaat  | gtgtcaattc  | atcaaatgag  |
| 8461  | catccgtggt   | aagcataaaa  | taaccaaggt  | aagagatgag  | tttttcaagt  | ttacaagata  |
| 8521  | aaaaaatgaa   | gagtagtgaa  | tttttaaagg  | gtgaggtatc  | atltgaacaa  | aaagcagaaa  |
| 8581  | tattacttga   | agtgtctatct | aacataccta  | gctttgtagg  | cgagactttt  | gtcattaaat  |
| 8641  | gcggtggtac   | aataatctta  | aatgaaacac  | tatttaatac  | ttttgtgcat  | aatgttgtct  |
| 8701  | tgttgaagca   | gcttggtata  | aatccggtaa  | taattcatga  | aggagaatat  | gaaattaact  |
| 8761  | cgggtgttaaa  | aatgctggat  | atgaacagta  | agtttgtgaa  | tggtatcaga  | cttacagaca  |
| 8821  | aagacactat   | gaaaatcatt  | gaaatggcac  | tgtgtggttc  | agttaataaa  | aaaattgttc  |
| 8881  | agcatataaa   | ttctgctggt  | ggttcagcta  | ttggattatg  | tggaaaagat  | ggtaacttaa  |
| 8941  | ttaaagccga   | aaaaataacc  | gctacgctta  | gagaagatag  | atcaaataat  | atcgaaaaga  |
| 9001  | tattagacat   | gggggttcac  | ggtagaccca  | ctgaaatcaa  | tcctgatata  | ttatttttta  |
| 9061  | ttgaagaatc   | agattttata  | ccagttattg  | caccaattgg  | tcattggaaa  | gatggggaaa  |
| 9121  | catatcatat   | tgatgccgat  | agcactgcaa  | gcgcaatcgc  | aatcgcagtt  | tctgcatcta  |
| 9181  | aatgataat    | cttgagtgac  | acagatgaag  | aaatagataa  | aattgggtgg  | aggaagatat  |
| 9241  | ctgttaaaaa   | tttaaatgca  | tcgattgatt  | gtgggaaaaa  | taaaggggaa  | aaatttattg  |
| 9301  | aaaggcttat   | ggcatacgtt  | aaaatggcgg  | aggaatgtgc  | tggagtgtgt  | cacatagtgt  |
| 9361  | atggtagaat   | acctaacatt  | atgcttgatt  | tattttactga | gagtaattca  | agcatatcga  |
| 9421  | ttgtgagtga   | tttatagcta  | tactgcttgc  | aactacacga  | ataccaagag  | ggtgtcattc  |
| 9481  | aagtagctga   | cactggaatg  | acagcaatct  | acgtcatacc  | gcgaatgaat  | cgcggtatct  |
| 9541  | ctagatcccg   | ctaacaagta  | gcgggatgac  | ggttgtcagg  | gtgtcatccc  | agcgccctta  |
| 9601  | tgatgtcatc   | ccagtgccca  | gacactggga  | tccagaagac  | ttaatttcaa  | ccaagtggct  |
| 9661  | gcataataag   | gactagattc  | cagactggaa  | tgacatcata  | gaggcactgg  | gatgacaaaa  |
| 9721  | aaaggagcac   | tgaacttgtc  | aaggaatttt  | atggccttagc | gtcacgcgct  | ggaatgacat  |
| 9781  | catttacatt   | tatcactttt  | gcagatacaa  | tttcatgct   | ataattgagt  | cttcatagat  |
| 9841  | ggtaaattgg   | agtgcaaaaga | agtaaaatta  | aagtagaaat  | aaaaagatta  | tcacacggag  |
| 9901  | aagacttgct   | tcttccatgt  | tatgcaacta  | cgcagagtgc  | tggcatggat  | ctttatgctg  |
| 9961  | cattgaatga   | ttctgctggt  | ttaaatccac  | ttgaaagatt  | acttggtcca  | actggaattg  |
| 10021 | tgattgcaat   | accaaacggt  | tttgaggggc  | aaatccgccc  | acgttctggt  | cttgctgcaa  |
| 10081 | aacatggaat   | cactgtctta  | aattctccgg  | gtactataga  | ctctgattat  | cgaggtgaag  |
| 10141 | ttaaaatttg   | tctaattaat  | ctaagtaatc  | agccatacga  | aataaaaaaga | ggagatagaa  |
| 10201 | tcgcacaaat   | ccttattttct | cctgtatctc  | aggtaatttg  | ggatgacaga  | gaagaattct  |
| 10261 | gcgcagaaga   | aaccggtcgc  | aatgcagggg  | gctttggctc  | aagcggcagg  | tagcttacga  |
| 10321 | aaaagcttaa   | ctatgacagt  | tctttttatac | acaatttaag  | catattaata  | ttttattaaa  |
| 10381 | tgaagtcggt   | tatgctaact  | ttcaaaaaatc | attgtggcca  | gctccacaaa  | gcaaacactg  |
| 10441 | tatttggtgc   | atlttactgct | atatacgtta  | taggtggatt  | agcaataact  | tcaacaccgc  |
| 10501 | tttgagggcc   | ttcaacttgc  | aagctagcag  | cttttgcagc  | tacaccactt  | ggaatgggcg  |
| 10561 | tttttagcatt  | tgttgctgct  | gcgctgactt  | atlttagcaat | atatgctatc  | agcaaaaaata |
| 10621 | acgaaatatac  | tgagttgaaa  | gctctgaagg  | ttattaagga  | tgggttgcta  | gtaacaaaag  |
| 10681 | acgcatttag   | ggaaattgca  | aggaataacc  | aagttaaaga  | tgaagaaggt  | aaggtagaaa  |
| 10741 | aggataaata   | ttatatagac  | ttcagcttag  | aaggcaagaa  | ctaccgtatt  | attgttgata  |
| 10801 | ttaatcagct   | taccagtata  | ctaggcaata  | ctttactctt  | caagataggt  | tcactaaaag  |
| 10861 | agaaaaacga   | tgaaggtaag  | ttcgaggcag  | taaatgaaac  | aaagtggaat  | aaaacattag  |
| 10921 | gttttagacaa  | agatggtgct  | aaagaggtta  | acacttattt  | aggctcacct  | attgttgaaac |
| 10981 | aagctgctaa   | aggaaaagta  | ccagactaga  | cagctaagta  | taaaagaggt  | agattaagtc  |
| 11041 | tgccctctttg  | tttttttgat  | tttcagtgtt  | acgcgcataa  | ctgcatggat  | gttgcgattc  |

|       |             |             |             |             |             |             |
|-------|-------------|-------------|-------------|-------------|-------------|-------------|
| 11101 | tcaaggcaac  | gtatctgttt  | agatgcatgg  | ctaattgctga | aacaaaaatt  | ccagtgttcc  |
| 11161 | ctttcttgtc  | atccaagtag  | ctgacactgg  | gatggctttg  | ttgcatcaca  | ctttatgaga  |
| 11221 | tggtgattta  | tggtaaattc  | atgtaactat  | ctcaaattta  | gccataccaa  | tatcagtga   |
| 11281 | tttattaagc  | aaatagcatt  | tgattagcag  | ttctttttct  | cgattttatct | cagattttatt |
| 11341 | cctaaaaacta | aatccgaata  | tttgctttta  | tcttgagaaa  | aacccttcaa  | tataagatct  |
| 11401 | tttcccataa  | tttactttct  | ttttccattc  | tttcatgcca  | tcttcaccgt  | ataattttat  |
| 11461 | taaccttaata | gcagcattcc  | tgtcagacat  | ataatctatt  | tctggatggt  | ctgccgcatt  |
| 11521 | gtttattgggt | ggaatttttg  | tctttatatc  | atattcggtt  | cacaacttat  | aaaacttggtg |
| 11581 | cctatcacat  | gctctatctg  | catatagtgc  | ttttatggca  | tgctgaaaat  | caacttcttt  |
| 11641 | tagcaaataca | caagctccat  | agtgatcagc  | cgttactgta  | ttttacagct  | atggcttttt  |
| 11701 | tgttgtttat  | attcaacatt  | acgtgcaatt  | ttctcgtttg  | ctcatagcca  | cgatattttc  |
| 11761 | tgtcagtgtc  | attttccttg  | ctgtgtgttg  | ttgtatatac  | taattcctgt  | actgtctata  |
| 11821 | gcaatttcga  | tatcttccat  | attattttct  | gcaatcattt  | atcttaatat  | taagtttctt  |
| 11881 | aaaccttctt  | gatgcttggt  | aatagctgat  | aactgccaaa  | tctcttcccta | tttggtgcaa  |
| 11941 | ataccctttt  | ataaaccgga  | ctgtttgtct  | taaaccaatt  | ctaaagaaac  | tgacgattat  |
| 12001 | atgcacaaaa  | atcacactt   | tatcactata  | aatatagttg  | ccgccctgca  | tttttgga    |
| 12061 | attctcgtac  | caattttcta  | tgggcgctatt | gatataacaa  | aaaatgcttc  | ctctttcttg  |
| 12121 | gagaaatttg  | ttatattcat  | ggcagttact  | gactctcatt  | ttttgtggca  | tattttttct  |
| 12181 | tcaacagtta  | aatggctatt  | tataatgaat  | tttgtcagta  | actgccagtt  | cttttcactt  |
| 12241 | gagcgatgca  | acaaagccca  | ctgggatcca  | gaagacttaa  | tttcaaccaa  | ataataaagg  |
| 12301 | ctggatccca  | gtgtcaagaa  | ctgggatctg  | gtagacaatg  | ttcatacagc  | agctactcgg  |
| 12361 | atgacacctt  | gtgcttgctg  | gctataattg  | ctaaggattt  | ttatttaatt  | taactgcac   |
| 12421 | ttttgcctta  | tccaataacc  | cattaataaa  | acctatttcg  | cttggtttat  | caagtaaata  |
| 12481 | agatgcaatg  | ttagtatatt  | cattaatgac  | aactggaact  | ggcgtatcac  | aattagctaa  |
| 12541 | ctcacatatt  | gcaacacgca  | aaatagataa  | gcttataaga  | tttaaccgtg  | aaagggacca  |
| 12601 | acttggtgtg  | aaataagact  | ctattatttt  | atcatattct  | tcactgcttt  | ttataacctt  |
| 12661 | atataacaag  | ttttctaaga  | actgatgttc  | aaattcttca  | cattcaaata  | tatctttcaa  |
| 12721 | cttattttatg | tagtccttaa  | gctcacaatt  | ttcccagttt  | aaaagtgtct  | ttgttgtaac  |
| 12781 | ctacgaaaat  | atgtgaataa  | gcaatttgta  | cagcaagaaa  | tcttgccgtg  | cttcttttta  |
| 12841 | tgcgccactt  | tttatctact  | ggtttttcct  | ccattatttt  | aattttattgt | gtaaatctat  |
| 12901 | catagcga    | acagttgagg  | ctgcatggcc  | accaacgttc  | tttttgtttt  | tatcagctct  |
| 12961 | aactagtgtc  | ttatctttgc  | tgtcagcggg  | aattacaccc  | ataccaaggg  | gtattgcata  |
| 13021 | atgcataaca  | acctcattta  | agccttcaat  | tactccttta  | caaacatatt  | gataatgatc  |
| 13081 | ggtttcaccg  | cgaattacgc  | acccaagagc  | taaataacca  | tcataattag  | tatgccact   |
| 13141 | cttgactgca  | aaaagaattg  | tagctgggtat | ctcaaattgta | ccaggaacct  | caactacatc  |
| 13201 | gtaactggca  | ttactgcctt  | ttaattttatc | aattgcacct  | tcaagcaaaa  | ggttcgctat  |
| 13261 | ttcagtataa  | taaatcgaat  | taactattag  | tattctcgac  | atttactacc  | actttttttg  |
| 13321 | ttaaaaacaa  | ctttattaat  | gactgttgaa  | ttagagtatt  | aatattacta  | aatatccaat  |
| 13381 | atattaccag  | gccggcagga  | aaagaagaaa  | aaataaagac  | agaaatgtaa  | ggtaaaaact  |
| 13441 | tcataacatt  | tacttgaata  | tcacttttac  | tggtttgatc  | tttctcactt  | agcttctgct  |
| 13501 | gaattatcat  | ggtggcaccg  | aaaattatag  | gtaaaatgcc  | tatagaaata  | ggaaagttaa  |
| 13561 | aattaacaa   | cccaaataat  | gtaaagatgt  | tcgttggtgc  | aggagctgaa  | agatccttaa  |
| 13621 | tccataaaaa  | aaaaggagca  | tgctctatct  | ctatagtaac  | aaataatact  | ttatatagag  |
| 13681 | caaaaaatac  | cgggtatttgt | attagcatgg  | gaaaaatgct  | cgacattgga  | tttacgttgt  |
| 13741 | ttctcttaaa  | caatgcaatt  | gtctctttat  | gctgctttaa  | gctgtcattt  | ttatacaact  |
| 13801 | cttttatacg  | agttaattca  | ggctgcaggc  | tttttacctt  | aaacatcgaa  | atatatgatc  |
| 13861 | tattagataa  | ggaaagcatc  | aaaagtttga  | ttactaaagt  | cagcaataat  | attgctaagc  |
| 13921 | caaaattttt  | taaaacgaag  | ttaaaatatt  | caagcagtaa  | aaacactggg  | ttagttataa  |
| 13981 | agtaaagaac  | acaaaaatct  | acagctttat  | caaacagggg  | tatattgaga  | gtgtccttat  |
| 14041 | aagaatccag  | taaattcaac  | ttttttgtct  | cagcaaaaaa  | ataattcaca  | ttagaaacgc  |
| 14101 | ttgcaccagg  | aagtatgtct  | ttgtaagggt  | tgacaaaaatc | tacttggaat  | ttatcagtat  |
| 14161 | tattaacgtt  | tgtgtgttta  | atgcttacat  | ttatttttatc | agattttttca | ggtagatgg   |
| 14221 | ctgtgagcca  | gtattttatca | gcaaaaccaa  | accaattttt  | ttcacttgta  | tttgctttta  |
| 14281 | ttaaatgttt  | cttgagagata | tccttatacg  | tccactcctc  | cagttttatta | tcaaatgcac  |
| 14341 | ccagtactcc  | ttcatgggat  | atccaataag  | attcggtgat  | attgtcacgt  | ttacgggttaa |
| 14401 | ttttaccata  | aggaacccaa  | actacattat  | cttttggtgtt | attttcaaca  | atctgtctaa  |
| 14461 | ttttaaacat  | gtagtattcg  | tcaaggctaa  | ttttcatttt  | aaacacaatg  | ccattttcat  |
| 14521 | tatcccaaaa  | taaattgacc  | tctttttgat  | tgagttttctc | tgcttgccaa  | actgccttag  |
| 14581 | aatctggaac  | tttaattcttg | ttattcggat  | cgagccaccc  | aaattctgcg  | aaatatacat  |
| 14641 | cttttgattc  | tgcaggtgac  | agtaacacca  | cttgttgaga  | agaagaattc  | ggttctaagt  |

```

14701 ggtaattagt taaaattaag tcatcaaacc ttgcaccttt cagagaaatt gatcctttta
14761 tcatgttatt ggttaaacta accctctgtt ctcgagtaga attaataatt tcagaacgat
14821 tttgggtatat tataggagca aggtcgttaa aagattcgat atgttcaatc aatggctggg
14881 tttgggtttgt actaaaaaaa ttatcataaa taatacgcca agacaccatg attaacatgg
14941 aaaggatagc tgccaaaatt aaactttttg cttctgacat gaaattaaat caaacatatc
15001 ttcttaaagt gtataactaaa tattgtacta aaacaatgaa atttacttat ttttaataat
15061 aactttttaac gctaattcttt aaaattttatt ttaatagctt caaatttttaa caatatgaac
15121 gcggtaaaaa atctagtatt ttgggttacta ataatagcca ctactgcaat gcttattgat
15181 tcacaaaggg acaaattaag cgacagattt ctgagtactt ttttaccata taaaggaaga
15241 attcaaaata gtggaagtat cgaattttacg aaatcatacg atggacactt ttatatcag
15301 gctcaagtca atgatagcaa tataacgttt ttgcttgata ctggagcaac cgatattggt
15361 ctatcacaaa aagacgcatt acatgctggg attaacttac aaaacgttca ggattttaaa
15421 atatatgaaa ctgcgaaagg tcaaataaaa gctggagtgg tccaaatacc tcaagttaaa
15481 ataggaaatt ttttgattaa tgatgtacag gcaagcgta acactcattc tatgtctcat
15541 tcactacttg gaatgagctt ttttaaggat tttcatttca ctataagaga taataagttg
15601 atattatacc gcgactaaac acttctacaa tctacttatc aaagctctgt aggtcaatat
15661 aggagcagaa ataaatattg cagaacaagt gccaatcaaa ataccaaaaa aaatgatcaa
15721 gctgaagtct ctactgcat ctgtgcagat taataccaaa ggaagagcag caagaagggt
15781 tgtaccagaa gttaatatag tgcgaaataa tgtagtgttg atacttgcat ctactacctc
15841 actcatccgc ccactttttac cactcctgcg atactctcga atccgatcat atataattac
15901 tgagttattg attgaataac caatgacagt aaggagagct gcaactgatg aaatattaaa
15961 ctcaatgcca gttaggctaa taaaaccaac agttaaaatc acgtcatgaa tcagtgtctg
16021 tattccactg aatccacatt gccaattaaa tctaaaccaa acgtaaaaaa atattccaac
16081 aatcgcgatc aacatggata acattccttc aaatatattgt gttgagctta tttgtggggc
16141 aacatagtct attttacgat agcttattga gtcctccagc ttttcttcta gtatgctttt
16201 tatctttttg attttatctt catctccttc atcttttaaa cgcattgacta aattatcacc
16261 cgcttttgaa ctttgcactg taaaaccatt ttcttttaat gcattcgagaa tagagtgatt
16321 ctcatctgaa gattttatct ctatcaaaat cccgcctgca aagtctatgc ctaagtccac
16381 tccacgcagc acaacagtga atattgaaaa gatgataaga acaatgctaa ttaatgcagt
16441 caaatcccta tatttactaa acttgatatc gaggttatct ggaatgagtc taagtgccat
16501 cttctttta taaagtaata atttgaattc tatatacttt tcaaaaaggt cactagttta
16561 ttttgtgatt gtttgactat gttaaatttt ctgtcagtta ttcttgtctg tcaattaagt
16621 tctatctagt gcaaactttg caattttgaa gtacattaca agagcaaaat actgccaatt
16681 tggcccatca ttttatctct gc

```

```

//
LOCUS      JAQZAU010000129                9299 bp    dna        linear    ENV 17-MAR-2023
DEFINITION MAG: Wolbachia pipientis isolate wEsol contig_59038, whole genome
            shotgun sequence.
ACCESSION  JAQZAU010000129  JAQZAU010000000
VERSION    JAQZAU010000129.1
DBLINK     BioProject: PRJNA929258
            BioSample: SAMN33142973
KEYWORDS   WGS; ENV; Metagenome Assembled Genome; MAG.
SOURCE     Wolbachia pipientis (insect metagenome)
ORGANISM   Wolbachia pipientis
            Bacteria; Pseudomonadota; Alphaproteobacteria; Rickettsiales;
            Anaplasmataceae; Wolbachieae; Wolbachia.
REFERENCE  1 (bases 1 to 9299)
AUTHORS    Fiutek,N., Couger,B.M., Roy,S., de la Torre,J.R. and Connor,E.F.
TITLE      Genomic assessment of the contribution of the Wolbachia
            endosymbiont of Eurosta solidaginis to gall-induction
JOURNAL     International Journal Molecular Sciences
REFERENCE  2 (bases 1 to 9299)
AUTHORS     Fiutek,N., Couger,B.M., Roy,S., de la Torre,J.R. and Connor,E.F.
TITLE      Direct Submission
JOURNAL     Submitted (10-FEB-2023) Biology, San Francisco State University,
            1600 Holloway Ave, San Francisco, CA 94132, USA
COMMENT     ##Genome-Assembly-Data-START##
            Assembly Date      :: JUN-2019
            Assembly Method     :: FLYE v. 06-2019

```

Genome Representation :: Full  
Expected Final Version :: Yes  
Genome Coverage :: 100.0x  
Sequencing Technology :: Illumina HiSeq; PacBio Sequel  
##Genome-Assembly-Data-END##

FEATURES

|        |                                                                                                                                                                                                                                                                                                                                                                                                                                                                                                                                                                                                                                                                                                                                                                                                                                                              |
|--------|--------------------------------------------------------------------------------------------------------------------------------------------------------------------------------------------------------------------------------------------------------------------------------------------------------------------------------------------------------------------------------------------------------------------------------------------------------------------------------------------------------------------------------------------------------------------------------------------------------------------------------------------------------------------------------------------------------------------------------------------------------------------------------------------------------------------------------------------------------------|
| source | 1..9299<br>/organism="Wolbachia pipientis"<br>/mol_type="genomic DNA"<br>/submitter_seqid="contig_59038"<br>/isolate="wEsol"<br>/isolation_source="galls on Solidago altissima"<br>/host="Eurosta solidaginis MN-2018-EFC"<br>/db_xref="taxon:955"<br>/environmental_sample<br>/country="USA: Cowling Arboretum, Carleton College,<br>Northfield, MN"<br>/lat_lon="44.48 N 93.13 W"<br>/altitude="280 m"<br>/collection_date="2018-11"<br>/metagenome_source="insect metagenome"<br>/note="metagenomic"                                                                                                                                                                                                                                                                                                                                                      |
| gene   | 250..552<br>/locus_tag="wEsol_01516"                                                                                                                                                                                                                                                                                                                                                                                                                                                                                                                                                                                                                                                                                                                                                                                                                         |
| CDS    | 250..552<br>/locus_tag="wEsol_01516"<br>/codon_start=1<br>/transl_table=11<br>/fullproduct="qcoverage 100 , hcoverage 100 , similarity<br>100 , identity 99.0 , evalue 3.32e-59 , alnlength 100 ,<br>Bacteria , Proteobacteria , WP_015588788.1 MULTISPECIES:<br>50S ribosomal protein L21 [unclassified Wolbachia]"<br>/cog="RplU COG0261 103 Ribosomal protein L21"<br>/pfam="Ribosomal_L21p"<br>/tigr="TIGR00061 L21 101 ribosomal protein L21"<br>/product="50S ribosomal<br>protein L21"<br>/translation="MFAVIETGGKQYLVKEGSIKVEKLEAEKKEVEINKVICISNN<br>GLSYSSNATVKAEMLQQCRGEKIIIFKKKRRKNYRRKTGHRQYITVLRINEISLQK"<br>/besthit="qcoverage 100 , hcoverage 100 , similarity 100<br>, identity 99.0 , evalue 3.32e-59 , alnlength 100 ,<br>Bacteria , Proteobacteria , WP_015588788.1 MULTISPECIES:<br>50S ribosomal protein L21 [unclassified Wolbachia]" |
| gene   | 563..832<br>/locus_tag="wEsol_01517"                                                                                                                                                                                                                                                                                                                                                                                                                                                                                                                                                                                                                                                                                                                                                                                                                         |
| CDS    | 563..832<br>/locus_tag="wEsol_01517"<br>/codon_start=1<br>/transl_table=11<br>/fullproduct="qcoverage 100 , hcoverage 100 , similarity<br>100 , identity 100 , evalue 2.90e-57 , alnlength 89 ,<br>Bacteria , Proteobacteria , WP_006279564.1 MULTISPECIES:<br>50S ribosomal protein L27 [Wolbachia]"<br>/cog="RpmA COG0211 87 Ribosomal protein L27"<br>/pfam="Ribosomal_L27"<br>/tigr="TIGR00062 L27 83 ribosomal protein L27"<br>/product="50S ribosomal<br>protein L27"<br>/translation="MATKKSGGSSCNGRDSAGRRLGIKKNGKVIPGNIIVRQRGTKFH<br>PGKNVGIGKDHTIFAKIEGWVSFRRSANKKTFIDIVPTDNMKASA"                                                                                                                                                                                                                                                                  |

```

/blasthit="qcoverage 100 , hcoverage 100 , similarity 100
, identity 100 , evalue 2.90e-57 , alnlength 89 ,
Bacteria , Proteobacteria , WP_006279564.1 MULTISPECIES:
50S ribosomal protein L27 [Wolbachia]"
gene 976..2148
/locus_tag="wEsol_01518"
CDS 976..2148
/locus_tag="wEsol_01518"
/codon_start=1
/transl_table=11
/fullproduct="qcoverage 100 , hcoverage 100 , similarity
100 , identity 100 , evalue 2.56e-288 , alnlength 390 ,
Bacteria , Proteobacteria , WP_174516991.1 MULTISPECIES:
methionine adenosyltransferase [unclassified Wolbachia]"
/cog="MetK COG0192 388 S-adenosylmethionine synthetase"
/pfam="S-AdoMet_synt_N S-AdoMet_synt_M S-AdoMet_synt_C"
/tigr="TIGR01034 metK 377 methionine adenosyltransferase"
/product="methionine
adenosyltransferase"
/translation="MSLYKNLVTSESVAAGHPDKVADQISDAILDEYLFTDPFARAAI
ETLVTKDNVVIAGEVFGPNIKNSRIESIVRNTIKDIGYKHDGFHWRKVKNILLHEQS
NDIAIGVDQAGDQGIMYGYATTETENLMPAPIFYAHSILKNIMSAVKEAKLGPDAKS
QITLAYENNLPVRAESIIIVSIQHPENLDQSKVKEIIYPYIVSSSLPEGWMCPEENLLVN
PTGRFVIGGPVGDCLTGRKIMVDITYGGYIPHGGGAFSGKDATKVDRAAAYMARYLAK
NIVFAGLAERCLVQLSYAIGVSKPTSFYIDTFGANKVEERVIKKFIENNIDLSTKGII
KHLNLCPIYKRTACYGHFGKQSERDGGFSWENMDLSADLCREFNIEGNSKISLDC"
/blasthit="qcoverage 100 , hcoverage 100 , similarity 100
, identity 100 , evalue 2.56e-288 , alnlength 390 ,
Bacteria , Proteobacteria , WP_174516991.1 MULTISPECIES:
methionine adenosyltransferase [unclassified Wolbachia]"
gene 2274..2957
/locus_tag="wEsol_01519"
CDS 2274..2957
/locus_tag="wEsol_01519"
/codon_start=1
/transl_table=11
/fullproduct="qcoverage 100 , hcoverage 100 , similarity
99.6 , identity 99.1 , evalue 1.63e-159 , alnlength 227 ,
Bacteria , Proteobacteria , WP_038249063.1 MULTISPECIES:
TenA family protein [unclassified Wolbachia]"
/cog="TenA COG0819 218 Putative transcription activator"
/pfam="TENA_THI-4"
/product="TenA family
protein"
/translation="MYNEIERELYNVIVKEFSDLIDKIKEHPFNVELINNTLDYEKFK
FYLQQDFLYCIDCARAFLIVAARVDDIEMMSSLINLAQGAIFYVREQYKKYFEDCDLSD
DHKKSRACSAFTDFFMSAAYHNSVNEALVASYS CFNIYQIVIRHVMNEITTKGVKNNK
YKEWINIYSSETVNAVIDEVTNITNKLYKKASDCEKKRMYEFFKKGLELEIMFWDEAY
YSNISSKEY"
/blasthit="qcoverage 100 , hcoverage 100 , similarity 99.6
, identity 99.1 , evalue 1.63e-159 , alnlength 227 ,
Bacteria , Proteobacteria , WP_038249063.1 MULTISPECIES:
TenA family protein [unclassified Wolbachia]"
gene 3002..3661
/locus_tag="wEsol_01520"
CDS 3002..3661
/locus_tag="wEsol_01520"
/codon_start=1
/transl_table=11
/fullproduct="qcoverage 100 , hcoverage 100 , similarity

```

```

100 , identity 100 , evalue 1.03e-158 , alnlength 219 ,
Bacteria , Proteobacteria , WP_174516992.1 TenA family
transcriptional regulator [Wolbachia endosymbiont of
Cardiocondyla obscurior]"
/cog="TenA COG0819 218 Putative transcription activator"
/pfam="TENA_THI-4"
/product="TenA family transcriptional
regulator"
/translation="MFSGIIRSCYGSNLLKDIIHHPFNVELANNTLNIENTFKFYAQOK
TLFLGDYICTTLITASKMEDYSSIIISLAEVAQRVVTVNRMLYDYYFTMYGISREKKSL
ECFNFTNFLLSISHSNTYEAMTVLYSCMFIYETVVDSMKNRFKKNNRYRDWFNFCYSD
SVKSGCIILENIVDGYCSRARENEKSRMLELFRITAQFVLDFLNGAYNFSRFNQFPKE
H"
/besthit="qcoverage 100 , hcoverage 100 , similarity 100
, identity 100 , evalue 1.03e-158 , alnlength 219 ,
Bacteria , Proteobacteria , WP_174516992.1 TenA family
transcriptional regulator [Wolbachia endosymbiont of
Cardiocondyla obscurior]"
gene 3709..4536
/locus_tag="wEsol_01521"
CDS 3709..4536
/locus_tag="wEsol_01521"
/codon_start=1
/transl_table=11
/fullproduct="qcoverage 100 , hcoverage 100 , similarity
100 , identity 100 , evalue 3.07e-197 , alnlength 275 ,
Bacteria , Proteobacteria , WP_006279354.1 MULTISPECIES:
cytochrome c oxidase subunit 3 [Wolbachia]"
/cog="CyoC COG1845 209 Heme/copper-type cytochrome/quinol
oxidase, subunit 3"
/pfam="COX3"
/product="cytochrome c
oxidase subunit 3"
/translation="MKSKEHDFHLVDPSPWPPIAVSAAILILALGLVGALHKQIVGMFC
LVLGISAVSGVLFYWWRDVIREAIYDKCHTAIVKHGLKFAMILYLFILSEVVFVFFCS
FFKAWLDPVFLFEAFSPAKKVEWPPEGILPPDPWSLPFMNTLILLLSGTTITWANHSL
LKNDKKSMLKLSITILLGVFFIIVQAIEYHEASFSLQETGEKLIYTSNFYMITGFHC
AHVIIIGIIFLSVCLFRARKGQFTLQDHLCFEFASWYWHFVDVWVIFLFLFVYWLSVY"
/besthit="qcoverage 100 , hcoverage 100 , similarity 100
, identity 100 , evalue 3.07e-197 , alnlength 275 ,
Bacteria , Proteobacteria , WP_006279354.1 MULTISPECIES:
cytochrome c oxidase subunit 3 [Wolbachia]"
gene 4537..5025
/locus_tag="wEsol_01522"
CDS 4537..5025
/locus_tag="wEsol_01522"
/codon_start=1
/transl_table=11
/fullproduct="qcoverage 100 , hcoverage 100 , similarity
100 , identity 100 , evalue 3.39e-111 , alnlength 162 ,
Bacteria , Proteobacteria , WP_015588791.1 MULTISPECIES:
crossover junction endodeoxyribonuclease RuvC
[Wolbachia]"
/cog="RuvC COG0817 160 Holliday junction resolvasome,
endonuclease subunit"
/pfam="RuvC"
/tigr="TIGR00228 ruvC 156 crossover junction
endodeoxyribonuclease RuvC"
/product="crossover junction
endodeoxyribonuclease RuvC"

```

```

/translation="MVKIIGLDPGISK TGWAIISLNEKNNIEFLGGGTISTDGKLG TG
ERLHTIFEQLKKVISLYSPNEAAVEKIFVNKNPKSSLT LGYARGVVILALKITKLT MN
EYDANYVKKSITGN GHADKDQMIFMVKQIVKNLSIKCHHAADALAVAICHAYTKGSCF
VE"
/besthit="qcoverage 100 , hcoverage 100 , similarity 100
, identity 100 , evalue 3.39e-111 , alnlength 162 ,
Bacteria , Proteobacteria , WP_015588791.1 MULTISPECIES:
crossover junction endodeoxyribonuclease RuvC
[Wolbachia]"
gene complement(5070..5537)
/locus_tag="wEsol_01523"
CDS complement(5070..5537)
/locus_tag="wEsol_01523"
/codon_start=1
/transl_table=11
/fullproduct="qcoverage 100 , hcoverage 100 , similarity
100 , identity 100 , evalue 1.25e-105 , alnlength 155 ,
Bacteria , Proteobacteria , WP_010082183.1 MULTISPECIES:
Holliday junction resolvase RuvX [Wolbachia]"
/cog="COG0816 COG0816 141 Predicted endonuclease involved
in recombination (possible Holliday junction resolvase in
Mycoplasmas and B. subtilis)"
/pfam="UPF0081"
/tigr="TIGR00250 RNase_H_YqgF 130 RNase H domain protein,
YqgF family"
/product="Holliday junction
resolvase RuvX"
/translation="MLHRNPDEFLKSIPKDKRIMCLDMGEKQIGIAFSDKTQLIATAH
SIYHRKNMSKDLGYLHRIFKENESGSMVIGLPLKMDEQETKWCKTIIQFANKIIKKYK
VNIYQLQDESFSTSIATHTLKITGISITKSKKIDDKISACIILQRTLDKINTIK"
/besthit="qcoverage 100 , hcoverage 100 , similarity 100
, identity 100 , evalue 1.25e-105 , alnlength 155 ,
Bacteria , Proteobacteria , WP_010082183.1 MULTISPECIES:
Holliday junction resolvase RuvX [Wolbachia]"
gene 7056..8021
/locus_tag="wEsol_01524"
CDS 7056..8021
/locus_tag="wEsol_01524"
/codon_start=1
/transl_table=11
/product="hypothetical protein"
/pfam="GatB_N"
/tigr="TIGR00133 gatB 481 aspartyl/glutamyl-tRNA(Asn/Gln)
amidotransferase, B subunit"
/translation="MTKEDWEAVIGLEVHAQVSSNTKLFSSSSSTEFGAEHNTQVSLVD
AAMP GTLPILNYCIEQAIR TGLALSAEINKYSYFDRKNYFYFDP L PQGYQITQFF EPI
VKNGRVFINDNEKEIRIARIHLEQDAGKSVHEESRTYVDLNRAGVALMEIVSEPD LRS
SAEAAECMKRLRQILRYIGSCDGDMEKGS LRCDANVSVRLKGSSTFGTRCEIKNLNSI
RYIVQAIDYEIQRQIEILES GEEISQDTLLFDVALGKTKVMRNKEDASDYRYFPEPDL
LPVEVSQDKIDS I KSSLPELPEQKKQRYIEKIRYQRIRCKRHYFR"
/cog="GatB COG0064 483 Asp-tRNAAsn/Glu-tRNAGln
amidotransferase B subunit (PET112 homolog)"
/besthit="qcoverage 95.9501557632399 , hcoverage
65.1162790697674 , similarity 100 , identity 99.7 ,
evalue 6.07e-213 , alnlength 308 , Bacteria ,
Proteobacteria , WP_015588792.1 MULTISPECIES:
Asp-tRNA(Asn)/Glu-tRNA(Gln) amidotransferase subunit GatB
[unclassified Wolbachia]"
gene 7969..8478
/locus_tag="wEsol_01525"

```

CDS 7969..8478  
/locus\_tag="wEsol\_01525"  
/codon\_start=1  
/transl\_table=11  
/product="hypothetical protein"  
/pfam="GatB\_Yqey"  
/tigr="TIGR00133 gatB 481 aspartyl/glutamyl-tRNA(Asn/Gln)  
amidotransferase, B subunit"  
/translation="MRKLGINEYDANVITSDKAIADYFEELIKKHDSKLAVTWLTVEL  
FGRLNKANIDIVSSPIKANALSELLDFIVDGTISAKLGKQVFDIMFETGKPASLIIEE  
QDLKQITDRGQISEVIDTIINSNQDKVQEQYKSGKTKLYGFFVGEVMKFTKGKASPDVV  
NSILSERLE"  
/cog="GatB COG0064 483 Asp-tRNAAsn/Glu-tRNAGln  
amidotransferase B subunit (PET112 homolog)"  
/besthit="qcoverage 100 , hcoverage 35.7293868921776 ,  
similarity 99.4 , identity 98.8 , evalue 2.67e-106 ,  
alnlength 169 , Bacteria , Proteobacteria ,  
WP\_015588792.1 MULTISPECIES: Asp-tRNA(Asn)/Glu-tRNA(Gln)  
amidotransferase subunit GatB [unclassified Wolbachia]"

gene 8552..>9299  
/locus\_tag="wEsol\_01526"

CDS 8552..>9299  
/locus\_tag="wEsol\_01526"  
/codon\_start=1  
/transl\_table=11  
/pfam="Pfam-B\_16775 DUF4297"  
/fullproduct="qcoverage 103.212851405622 , hcoverage  
83.4415584415584 , similarity 96.9 , identity 96.9 ,  
evalue 1.00e-155 , alnlength 257 , Bacteria ,  
Proteobacteria , WP\_174516855.1 hypothetical protein  
[Wolbachia endosymbiont of Cardiocondyla obscurior]"  
/translation="MLFPKHAVDREYSFRLFTEKKSAKDFDDIVLRYEQDGKIVHRFI  
QVKHRQGRHKKISIGDLLTPGKDGAFLIKYLIAYLKIKSSGEFEIEIDFDSADSTS  
HPVRKLRMMPSGKNKGKEISVIRIDTQDEFDVG DGVRVKFDNSIISYLQENKDFVKR  
EVGREVSNKEIEDFLNKLVFVAVNLPSTELSEIIKSELGKEFSNTDAKHFYSTRYQEEV  
LILLEKEEEEFLLSYEKAKALLEEIREEILGA"  
/product="hypothetical protein"  
/besthit="qcoverage 103.212851405622 , hcoverage  
83.4415584415584 , similarity 96.9 , identity 96.9 ,  
evalue 1.00e-155 , alnlength 257 , Bacteria ,  
Proteobacteria , WP\_174516855.1 hypothetical protein  
[Wolbachia endosymbiont of Cardiocondyla obscurior]"

gene 842..918  
/locus\_tag="wEsol\_tRNA-27"

tRNA 842..918  
/locus\_tag="wEsol\_tRNA-27"  
/gene="tRNA-Ile"  
/intronpos="0..0"  
/program="tRNAscan-SE"  
/cove\_score="72.3"  
/evidence=predicted  
/type="Ile"  
/anticodon=GAT  
/product="tRNA-Ile (GAT) "

#### ORIGIN

```
1 tcggatgaca ggagaagggg ctacttgaat gacggtgtcg gtaaacttag agctataata
61 actatttgcc ttttttctgc ttaggttatg caagaagtct actgtctgag aaaaagtaga
121 taaagggtga agaaagatag aagtgttttag atagcttaaa agaacgtta agtcatgctt
181 tttatttata ttgacagcgt atatgacatc gtttacgatt aaagttaata acaataattt
241 atatttatca tgtttgcagt aattgagact ggtggaaagc aatatttagt aaaagaaggt
```

|      |             |             |            |             |             |             |
|------|-------------|-------------|------------|-------------|-------------|-------------|
| 301  | agtataataa  | aggtagagaa  | gttagaagct | gaagaaaaaa  | aagaggtgga  | aatcaataag  |
| 361  | gtgatttgta  | tttcaaataa  | tggcttatct | tattcatcta  | atgctactgt  | taaagctgaa  |
| 421  | atgttgcagc  | agtgcagggg  | ggaaaaaatt | ataatcttta  | agaagaaaag  | aagaaaaaat  |
| 481  | taccgtagga  | aaactgggtca | taggcagtat | ataactgttc  | ttcgtataaa  | tgaaattagt  |
| 541  | cttcaaaagt  | aagaggtaag  | atatggcaac | taaaaaatca  | ggtggtagtt  | cctgtaatgg  |
| 601  | tagagattca  | gcgggtcgta  | ggttaggaat | aaagaagaat  | gggaaggtta  | ttcctggtaa  |
| 661  | cataattgtg  | cgccaaagag  | gcacaaaatt | ccatcctggg  | aagaatgttg  | gtataggtaa  |
| 721  | agatcatacg  | atTTTTgcta  | aaatagaagg | ctgggtcagc  | tttagaagggt | cagcaaataa  |
| 781  | aaagactttt  | attgatattcg | tgcctacaga | taatatgaaa  | gcttcagctt  | gaataaatca  |
| 841  | tgggtctgta  | gctcaggtgg  | ttagagcgca | cgcttgataa  | gcgtgagggtc | ggaggttcaa  |
| 901  | ctcttcccgag | acccaccatt  | tagtagttac | taactctgtt  | ttctatagcg  | gttttgatat  |
| 961  | tgtataagca  | aaaacatgag  | tttatataaa | aatttagtaa  | ccagtgaatc  | agtggcggct  |
| 1021 | ggcatccag   | ataaagtagc  | agatcaaatt | tcagatgcaa  | tacttgatga  | gtaccttttt  |
| 1081 | actgatcctt  | ttgcgcgagc  | tgcaatagag | acttttagtca | caaagataa   | cgttattata  |
| 1141 | gctggggaag  | tgtttgggcc  | taacatcaaa | aatagcagga  | ttgaaagtat  | tgtacggaat  |
| 1201 | acaataaaag  | atattgggtta | caagcacgat | gggttccact  | ggagaaaagt  | gaaagtaa    |
| 1261 | atattgctgc  | atgagcaatc  | aaatgacatt | gcaatagggg  | tggtatcaagg | tgctggagat  |
| 1321 | cagggcataa  | tgtatggcta  | tgcaacaaca | gagacagaaa  | accttatgcc  | ggcaccatt   |
| 1381 | ttttatgcac  | actcgattct  | gaaaaatatc | atgagcgag   | ttaaagaagc  | aaaacttgggt |
| 1441 | ccagatgcaa  | agtcacaaat  | cactttggca | tatgagaata  | acctcccgggt | acgtgctgaa  |
| 1501 | agtattattg  | tctcgataca  | gcaccctgag | aatttggatc  | aatcaaaagt  | aaaagaaata  |
| 1561 | atttaccctt  | acatagtttc  | atctttacct | gaaggatgga  | tgtgtcctga  | ggaaaatctc  |
| 1621 | ttagtcaatc  | caactggtag  | atttgttatt | ggtgggccag  | ttggtgattg  | tggtattaacc |
| 1681 | ggacgaaaaa  | ttatggttga  | tacttatggg | ggttatattc  | cacacgggtg  | aggggcattt  |
| 1741 | tccggaag    | atgcaactaa  | agttgataga | tctgcagctt  | atatggcaag  | ataccttgct  |
| 1801 | aaaaatattg  | tctttgcagg  | tttggtgaa  | cgttgtcttg  | tgagctttc   | ttatgcaatt  |
| 1861 | ggtgtatcaa  | aacctacttc  | attctatatt | gatacatttg  | gtgcgaataa  | ggtagaggaa  |
| 1921 | agagtaatta  | aaaagtttat  | cgagaataat | atagatttat  | caacaaaagg  | cataatcaag  |
| 1981 | catttatcgc  | ttaattgccc  | tatatataaa | cgtacagcct  | gttatggaca  | ttttggtaaa  |
| 2041 | cagtcggaaa  | gggacgggtg  | attttcttgg | gaaaacatgg  | acttatctgc  | tgatctttgt  |
| 2101 | agagaattca  | atatagaagg  | taatagtaaa | atttcttttag | attgctaaaa  | tttttgattt  |
| 2161 | acagcctcat  | atttatatac  | tagcttattg | ttaaagcata  | gcacgctttt  | tcataataat  |
| 2221 | tataccatat  | tagtaataat  | tttatattca | atttttattg  | tgaggcttat  | aaagtgtata  |
| 2281 | acgaaataga  | aagagaactg  | tacaacgtaa | ttgtaaaaga  | gttttctgat  | cttattgata  |
| 2341 | aaataaaaaga | acaccctttt  | aatgttgaat | tgataaaata  | tacattagat  | tatgaaaaat  |
| 2401 | tcaaattcta  | ccttcagcag  | gattttctgt | attgtataga  | ttgcgctcgt  | gcttttttaa  |
| 2461 | ttgttgcagc  | tagagttgat  | gatattgaaa | tgatgagtag  | tttaatcaat  | ttggcacaag  |
| 2521 | gagcatttta  | tgttcgagaa  | cagtataaaa | aatattttga  | agattgtgat  | ctatctgatg  |
| 2581 | atcacaaaaa  | gtcaagagct  | tgttctgcct | ttactgactt  | tttcatgagt  | gccgcataatc |
| 2641 | acaattctgt  | taatgaagct  | ttagtagcat | cttattcttg  | ctttaacata  | taccaaatcg  |
| 2701 | ttatacgcca  | tatggtaaat  | gagataacaa | ctaaaggggt  | taaaaaataac | aaatacaaaag |
| 2761 | agtggatcaa  | cattttatagt | agcgaaacag | taaagtctgt  | aattgatgag  | gttactaata  |
| 2821 | ttacaaataa  | gctatataaa  | aaagctagt  | actgtgaaaa  | aaagaggatg  | tatgagtttt  |
| 2881 | ttaagaaagg  | gctggaatta  | gaaataatgt | tttgggatga  | ggcatattac  | tctaataatat |
| 2941 | ctagcaaaga  | atattagcag  | cggattattt | acgttaactt  | gatcttttat  | cgataactac  |
| 3001 | agtgttcagt  | ggcataatta  | ggagctgtta | cgggtcaaat  | cttttaaagg  | atataattga  |
| 3061 | gcaccccttt  | aatgttgagt  | tagcgaataa | caccctaaat  | atagagaact  | tcaaattcta  |
| 3121 | tgctcaacaa  | aagacgttgt  | tcttaggtga | ttatatattgt | accaccttaa  | ttactgcac   |
| 3181 | caaaatggaa  | gattatagta  | gtattatctc | gcttgctgaa  | gtagcccaaa  | gagtagtgac  |
| 3241 | tgtaaataga  | atgttatatg  | actactactt | tactatgtac  | ggtataagtc  | gcgaaaagaa  |
| 3301 | atctcttgag  | tgttttaatt  | tcactaattt | tcttttatcc  | atctcgcata  | gtaataccta  |
| 3361 | tgaggctatg  | acgggtttgt  | attcttgcac | gtttatatac  | gagactgtcg  | ttgatagcat  |
| 3421 | gaaaaataga  | ttcaagaaaa  | ataatagata | tagggatttg  | tttaattttt  | gttacagtga  |
| 3481 | ttcagtaaa   | tctggatgca  | ttatttttga | aaatattgtt  | gatggatatt  | gcagcagagc  |
| 3541 | aagagaaaac  | gaaaagagca  | gaatgcttga | gttgtttaga  | ataactgcac  | aatttgtgtt  |
| 3601 | agattttttg  | aacgggtgcat | ataatttttc | aagattcaat  | caatttccta  | aggaacattg  |
| 3661 | acaattttta  | gctaatttgt  | atccttaata | agtatttttt  | aaaatgctat  | gaaaagtaaa  |
| 3721 | gaacatgatt  | ttcatttagt  | ggatccaagc | ccttggccaa  | ttgctgtatc  | agcagcaatt  |
| 3781 | cttattcttg  | cacttggatt  | agttggcgcg | cttcataaac  | aaattgtcgg  | aatgttttgt  |
| 3841 | ttagtttttg  | gaatctccgc  | agtatcaggg | gtgctgtttt  | attggtggag  | agatgtaata  |

|      |             |             |             |            |             |             |
|------|-------------|-------------|-------------|------------|-------------|-------------|
| 3901 | agggaggcca  | tttatgacaa  | atgtcacact  | gccattgtaa | aacatggact  | caaatttgca  |
| 3961 | atgtacttgt  | ttattctctc  | ggaggtcgta  | ttttttatag | tgttcttttg  | ttcattcttt  |
| 4021 | aaagcctggc  | ttgatccagt  | ttttttat    | gaggcgtttt | ctcctgcaaa  | aaaagttgaa  |
| 4081 | tggccccctg  | agggaatttt  | gccacctgat  | ccgtggtcac | taccattcat  | gaatacatta  |
| 4141 | atattattgc  | tttctggtac  | aacaattact  | tgggcaaadc | actctttact  | taaaaatgat  |
| 4201 | aaaaagagca  | tgattaaaat  | gctgtccata  | actatatgtc | ttggagtttt  | ttttataata  |
| 4261 | gtgcaagcaa  | tagagtatca  | tgaagcgagt  | ttttctctac | aagaaacagg  | agaaaagctt  |
| 4321 | atttatacat  | ccaattttta  | catgattacc  | ggtttttact | gcgcacacgt  | tataatagga  |
| 4381 | ataatatttt  | tatcagtgtg  | tttattttaga | gcacggaaag | gccaattttac | acttcaggac  |
| 4441 | catttgtgct  | ttgagtttgc  | ctcctgggtat | tggcactttg | tagatgtagt  | ctggatattt  |
| 4501 | ttattttttgt | ttgtctattg  | gttaagcggt  | tattaagtgg | ttaaaataat  | aggtctagat  |
| 4561 | ccaggaataa  | gcaagactgg  | gtggggccatt | atcagcctga | acgaaaaaaa  | taatattgaa  |
| 4621 | tttttggggc  | gcggtaccat  | atcaactgat  | ggtaaattgg | gtacaggtga  | acgcctacat  |
| 4681 | acaatttttg  | aacaattaaa  | gaaagtaatt  | tccctatact | ctccgaatga  | agctgcgggtg |
| 4741 | gagaaaattt  | ttgttaataa  | aaatcctaaa  | tcttcactaa | ctttaggata  | tgcaagaggg  |
| 4801 | gttgtaattt  | tagcgttaaa  | aataacaaag  | ctaactatga | atgaatatga  | tgcaaacat   |
| 4861 | gtaaaaaaaa  | gcattaccgg  | aatggccat   | gctgataagg | atcagatgat  | atttatgggtg |
| 4921 | aagcaaatag  | ttaaaaattt  | gagtataaaa  | tgccaccatg | ctgctgacgc  | tcttgctgta  |
| 4981 | gcaatttgtc  | atgcttatac  | gaaaggttct  | tgttttggtg | agtaactttt  | atatgggatt  |
| 5041 | cagtttgaag  | atttccagat  | ctggaaaaac  | tatttgattg | tatttatctt  | gtctaactgt  |
| 5101 | cgttgcaaaa  | taatacatgc  | ggagatttta  | tcatctattt | ttttcgattt  | tgtgattgat  |
| 5161 | attccagtaa  | tttttagtgt  | atgagttgctg | atagatgttg | agaagctttc  | gtcctgtaag  |
| 5221 | tatatattta  | ctttataattt | ttttattatt  | ttatttgcta | attggattat  | agttttacac  |
| 5281 | catttagttt  | cttgctcgtc  | catttttaatt | ggtagtccta | ttaccattga  | tccagattca  |
| 5341 | ttttctttga  | atattctatg  | cagataacct  | aaatctttgc | tcatattttt  | tctgtgat    |
| 5401 | atgctatgag  | ctgtggctat  | gagctgtgtt  | ttatcgctaa | atgctatgcc  | tatttgcttt  |
| 5461 | tctcccatgt  | caaggcacat  | tatgcgctta  | tcttttgtaa | tagacttttag | aaactcatct  |
| 5521 | ggatttctat  | gtagcatcta  | ttagacttcc  | tttaaagtga | ccttaccaaa  | aaagtggaga  |
| 5581 | gaaagttaag  | aaaatttttt  | acaaaaagaa  | taatgaatca | aattgctcag  | gaatgcaata  |
| 5641 | gacttcttgc  | ataacccaaa  | ctaagtagaa  | aaaaggtatc | atctaagtag  | ctgacactgg  |
| 5701 | tttccatcca  | aaagggcagt  | gcccctatga  | tgctattcca | gtgcttgaca  | ctggaatcca  |
| 5761 | gactttaatt  | gttatacttg  | taaataagtc  | tggtgagaat | agacgttcat  | ctcaaaatgc  |
| 5821 | agtatttttg  | ttgaaatagc  | tcaactggat  | tccagcgcta | cgcgctggaa  | tgacaccttt  |
| 5881 | gtgtttgcat  | agctgtacga  | acattgtgat  | ttgagagcaa | tccccacaa   | ggaggatgtc  |
| 5941 | attccagtg   | ccagacactg  | gaatccagga  | aaaagaatgg | tgctatccaa  | gtagctgaca  |
| 6001 | ctgggatggc  | tttggttgc   | cgctacttat  | gaaaggctaa | ctataattag  | gattataagc  |
| 6061 | aacctattga  | aaatcttggt  | tttttgcaat  | caatctgatc | aaatttaaga  | atagtaattt  |
| 6121 | attattttata | ttataaaatt  | taattctatt  | gaaaatagct | aaagcattga  | aattattgaa  |
| 6181 | tttttagccg  | attagtga    | ggtagtgaaa  | tttcttttac | tcaaatttag  | gtattcactg  |
| 6241 | accgttcttg  | ttataaatac  | cagaataata  | agctactgat | attctccacc  | ttttttatct  |
| 6301 | ttaatccatc  | atagctagcg  | atgcaacaaa  | gcccactggg | atccagaaga  | cttaattttca |
| 6361 | accaataaat  | aaaggctgga  | tcccagtgct  | tggcactgga | atgacagcaa  | tcctacgtca  |
| 6421 | taccgcaatt  | cattcgcggt  | atctcgccg   | ctaacaagta | gcgggatgac  | ggttatcggt  |
| 6481 | tagctacaaa  | cattaagaaa  | tttaccacaa  | gaaaaaaaag | gcaaaaagaag | ccccgtgggt  |
| 6541 | ggctaattac  | ttacattata  | ctttcaagta  | tggcgttttt | ttatttctaaa | cacttaataa  |
| 6601 | ccgcgattca  | gttgctttta  | aaccgcaact  | aatctaaatt | ataaacgtta  | agaaaatttac |
| 6661 | taaacagaaa  | aaaaggcaaa  | agaaacccta  | gggtagctag | ttattcacta  | tccatttttt  |
| 6721 | aagttggcgt  | ttttttatgt  | tttaaactgt  | ttataagcgc | gtttcagctt  | atgtaggtag  |
| 6781 | aagttttata  | aagacataag  | gtgcacatag  | tgcaaaaaat | taaacatgag  | acgccagata  |
| 6841 | cgtgagtttt  | tttgtcattt  | aatctgtaca  | gagaagataa | ataaatagct  | tcaattttat  |
| 6901 | gataagaggg  | ctggcggaagc | ttgtcaagta  | atcttttgca | tttaaccctg  | ttctatgggt  |
| 6961 | aaaacaatct  | gcataccact  | tagctaacat  | gagttttgtt | ttgacttttt  | gtgctaattt  |
| 7021 | tgcagaatat  | taagattatc  | atttaaataa  | aatacatgac | gaaagaggat  | tgggaagcgg  |
| 7081 | taattgggct  | tgaggtagac  | gctcaagttt  | cttctaatac | gaagctattt  | tctagctcat  |
| 7141 | caacggaatt  | tgggtgctgag | cataacactc  | aagtttctct | agttgatgag  | gcaatgccag  |
| 7201 | gtacgctgcc  | aatactaaat  | tattactgca  | tagagcaagc | aatacgcaact | gggtctgac   |
| 7261 | tttctgcaga  | aattaataag  | tattcttact  | ttgatcgga  | aaattatttt  | tatcctgatt  |
| 7321 | taccacaagg  | ttaccagata  | actcagtttt  | ttgagccaat | agttaaaaac  | ggtagagtat  |
| 7381 | ttatcaacga  | caatgaaaaa  | gaaataagaa  | ttgcgagaat | tcatttagag  | caagatgcag  |
| 7441 | gaaagagcgt  | tcatgaggaa  | agcagaactt  | atgtagattt | aaatcgtgca  | ggggttgctt  |

```

7501 taatggaaat tgtttcagaa ccagatctcc gttcatctgc agaagctgca gaatgcatga
7561 aaagattgag gcagattttg cgttacattg gttcgtgtga tggatgatag gaaaagggat
7621 cacttcgttg tgatgcaaatt gtttctgttc gcctaaaagg cagtagtaca tttggcactc
7681 gttgtgaaat aaaaaatctg aactcgatac gttatatgtt gcaagctata gactatgaaa
7741 taaaaagaca aattgaaatt ttagaaagtg gagaagaaat aagtcaagat accttattgt
7801 ttgatgtcgc tttgggaaaa acaaaagtga tgcgaaacaa agaagatgca agcgactata
7861 gatacttccc tgagcctgat ttattacctg ttgaggtaag ccaggataaa atcgattcta
7921 ttaaatacatc tttacctgag ttgccagagc agaaaaagca gcgatacatt gagaaaatta
7981 ggtatcaacg aatacgatgc aaacgtcatt acttccgata aggcgattgc tgattacttt
8041 gaggaattga taaaaaaaca tgattcaaag ctgcggtca cctgggtaac tgtagagctt
8101 ttcggctcgtt taaataaagc aaatattgat attgtgagct cccaatcaa agcaaatgct
8161 ttgtccgaac tcttagattt tatcgttgat ggaacaatct ctgctaaact tggtaaacia
8221 gtttttgata ttatgtttga aactggcaaa cctgcatctc tcatcataga agagcaggac
8281 ctaaagcaaa taaccgatag aggtcaaata tcagaagtta tcgacacaat catcaatagc
8341 aaccaagata aagttcaaga atacaaaagc ggtaaaacia aattatatgg tttctttgtt
8401 ggtgaagtca tgaaattcac caagggaaaa gccagccctg atgttgtgaa ttcaattttg
8461 agtgagagat tagagtgagg tgcctgtaag attatcctgc ttggcgggta agcgcacctt
8521 tcatgggtatt atgtatcaag cgagatggct aatgctgttt cctaaacatg cagtagatag
8581 agagtattct ttccgcctat tcacagagaa aaaatcagct aaggattttg atgatattgt
8641 tcttcggtat gaacaagatg ggaaaatagt acatagattc atacaagtca agcacaggca
8701 gggtaggcac aaaaagatca gcataggtga cttattaaca ccgggaaagg atggtgcgtt
8761 tggcttaata aaatatctca ttgcttattt aaagatcaaa agtagtgagg agtttgaggg
8821 tgaaatagag gattttgatt ccgcggattc gacatcgcat ccagtaagaa agctgagaat
8881 gatgccgagt gggagaataa aaggaaagga aatttcagtc ataagaatag acacacaaga
8941 tgagtttctg gatgtagggt atggtgtaag atataaattt gataatagta ttatctcata
9001 tttgcaggaa aataaggatt ttgtaaagcg tgaggtaggt agagaagtca gcaataaaga
9061 aatagaagac tttttaaata aattagtatt tgcagtcaat ttgccaagcg gaactgaact
9121 tagtgaaatt attaagagtg aattgggcaa ggaattcagc aatactgatg caaagcactt
9181 ttacagccgt taccaggaag aagtgtgat tttgctggag aaagaagaag aggagtttct
9241 atcatatgag aaagcaaaag ctcttcttga agaaataaga gaggaaattt taggagcgg

```

//

```

LOCUS      JAQZAU010000130      10932 bp      dna      linear      ENV 17-MAR-2023
DEFINITION MAG: Wolbachia pipientis isolate wEsol contig_59165, whole genome
            shotgun sequence.
ACCESSION  JAQZAU010000130 JAQZAU010000000
VERSION    JAQZAU010000130.1
DBLINK     BioProject: PRJNA929258
            BioSample: SAMN33142973
KEYWORDS   WGS; ENV; Metagenome Assembled Genome; MAG.
SOURCE     Wolbachia pipientis (insect metagenome)
ORGANISM   Wolbachia pipientis
            Bacteria; Pseudomonadota; Alphaproteobacteria; Rickettsiales;
            Anaplasmataceae; Wolbachieae; Wolbachia.
REFERENCE  1 (bases 1 to 10932)
AUTHORS    Fiutek,N., Couger,B.M., Roy,S., de la Torre,J.R. and Connor,E.F.
TITLE      Genomic assessment of the contribution of the Wolbachia
            endosymbiont of Eurosta solidaginis to gall-induction
JOURNAL     International Journal Molecular Sciences
REFERENCE  2 (bases 1 to 10932)
AUTHORS    Fiutek,N., Couger,B.M., Roy,S., de la Torre,J.R. and Connor,E.F.
TITLE      Direct Submission
JOURNAL     Submitted (10-FEB-2023) Biology, San Francisco State University,
            1600 Holloway Ave, San Francisco, CA 94132, USA
COMMENT    ##Genome-Assembly-Data-START##
            Assembly Date      :: JUN-2019
            Assembly Method    :: FLYE v. 06-2019
            Genome Representation :: Full
            Expected Final Version :: Yes
            Genome Coverage     :: 100.0x
            Sequencing Technology :: Illumina HiSeq; PacBio Sequel

```

```

##Genome-Assembly-Data-END##
FEATURES             Location/Qualifiers
     source            1..10932
                        /organism="Wolbachia pipientis"
                        /mol_type="genomic DNA"
                        /submitter_seqid="contig_59165"
                        /isolate="wEsol"
                        /isolation_source="galls on Solidago altissima"
                        /host="Eurosta solidaginis MN-2018-EFC"
                        /db_xref="taxon:955"
                        /environmental_sample
                        /country="USA: Cowling Arboretum, Carleton College,
                        Northfield, MN"
                        /lat_lon="44.48 N 93.13 W"
                        /altitude="280 m"
                        /collection_date="2018-11"
                        /metagenome_source="insect metagenome"
                        /note="metagenomic"
     gene              complement(74..1780)
                        /locus_tag="wEsol_01527"
     CDS                complement(74..1780)
                        /locus_tag="wEsol_01527"
                        /codon_start=1
                        /transl_table=11
                        /fullproduct="qcoverage 100 , hcoverage 100 , similarity
                        100 , identity 100 , evaluate 0.0 , alnlength 568 ,
                        Bacteria , Proteobacteria , WP_015589069.1 MULTISPECIES:
                        arginine--tRNA ligase [unclassified Wolbachia]"
                        /cog="ArgS COG0018 577 Arginyl-tRNA synthetase"
                        /pfam="Arg_tRNA_synt_N tRNA-synt_1d tRNA-synt_1c
                        tRNA-synt_1e tRNA-synt_1 tRNA-synt_1e tRNA-synt_1f
                        tRNA-synt_1g DALR_1"
                        /tigr="TIGR00456 argS 569 arginine--tRNA ligase"
                        /product="arginine--tRNA
                        ligase"
                        /translation="MNIFKQISSLIFSKLNELKQRGVISTSAANFIIPEPPSNRVHGDI
                        YTNVAMVLAKHEKKNPIEIAEVLAKFELFDEVAKVEIAGSGFINMHLKIEVWHGILK
                        QINELKTEFGTLDIGNNQAINVEFVSANPTGPLHIGHARGAVFGDVLANLLKKVGYKV
                        TKEYYINDAGAQIDTLIRSVYLRYKEALGEKISVEKGLYPGEYLKPIGEGLAKKYGAE
                        LLEKQDNQVIRDYTLSSILEIIKEDMNLGLVNHDVFTSEYELQKSGKIEESIKILSDK
                        GLVYEGYLEKPKGKESENWTSRKEMLFSTKFGDDVDRLKKEDGSWTYFASDIAYHF
                        DKISRGFNNMIVELGSDHGGYVKRLKAVVSALSDDQAKIEVKLHNIVNFFENGKPVKM
                        SKRSGNFLTARDVVEEVGRDITRFIMLTRKNDMVLDFDFAKVKEQSKDNPIFYVQYAH
                        ARAHSLMRNAPKELPTADPSLLRTGGELFLIKTLAKWPDVVEIAARLCEPHRITFYLL
                        EVAEAFHVLWGYGKSDLNMRFILEDNLNLTAARMFLVQALAHVIASGLSIFNIEPLEE
                        MS"
                        /besthit="qcoverage 100 , hcoverage 100 , similarity 100
                        , identity 100 , evaluate 0.0 , alnlength 568 , Bacteria ,
                        Proteobacteria , WP_015589069.1 MULTISPECIES:
                        arginine--tRNA ligase [unclassified Wolbachia]"
     gene              complement(1874..2671)
                        /locus_tag="wEsol_01528"
     CDS                complement(1874..2671)
                        /locus_tag="wEsol_01528"
                        /codon_start=1
                        /transl_table=11
                        /pfam="Pfam-B_16803 Pfam-B_2815 Trigger_C"
                        /fullproduct="qcoverage 94.3396226415094 , hcoverage
                        132.275132275132 , similarity 70.8 , identity 70.8 ,
                        evaluate 2.99e-40 , alnlength 250 , Bacteria ,

```

Proteobacteria , WP\_174516964.1 hypothetical protein  
[Wolbachia endosymbiont of Cardiocondyla obscurior]"  
/translation="MEIFYANEYFFLSESKNANHVRILPLDTCYVSDMLKINLFTKLD  
DCKVNGKGLIYDKCGKDLKCKIDDKTMNELKKCFKFEIDDKTKNELKENIKNELEKGL  
KCEIDDKTKNELKENIKNELEKGLKCEIDDKTKNELKENIKNELEKGLKCEIDDKTKN  
ELKENIKNELKKGLKCEIDDKTMNKLKESIKNELKKGLKCEIDDKTMNKLKESIKNEL  
KKEKEPDDVKEPDDVKEPDDVEEPDAGNDGYSEGMAFSYHGYGNDLI"  
/product="hypothetical protein"  
/besthit="qcoverage 94.3396226415094 , hcoverage  
132.275132275132 , similarity 70.8 , identity 70.8 ,  
evalue 2.99e-40 , alnlength 250 , Bacteria ,  
Proteobacteria , WP\_174516964.1 hypothetical protein  
[Wolbachia endosymbiont of Cardiocondyla obscurior]"  
gene complement(2745..3266)  
/locus\_tag="wEsol\_01529"  
CDS complement(2745..3266)  
/locus\_tag="wEsol\_01529"  
/codon\_start=1  
/transl\_table=11  
/fullproduct="qcoverage 99.4219653179191 , hcoverage  
90.0523560209424 , similarity 99.4 , identity 99.4 ,  
evalue 4.29e-103 , alnlength 172 , Bacteria ,  
Proteobacteria , WP\_182319250.1 hypothetical protein  
[Wolbachia pipientis]"  
/translation="MACITDPRYHHNFDPRCHNRFDSRHDGLELNIQLPEFDLNIPPC  
PACPDTVCPPAPACPACPPCPQVKPEPESKTIVDFSKLAITVNPITDDILDITREPT  
GYKFKECAKTIQNAKNNLQVIDGKLVGSCENNSECDKCVEVINSSILDAKSAEAFFST  
HNMSVLEGTVHII"  
/product="hypothetical protein"  
/besthit="qcoverage 99.4219653179191 , hcoverage  
90.0523560209424 , similarity 99.4 , identity 99.4 ,  
evalue 4.29e-103 , alnlength 172 , Bacteria ,  
Proteobacteria , WP\_182319250.1 hypothetical protein  
[Wolbachia pipientis]"  
gene 3349..4692  
/locus\_tag="wEsol\_01530"  
CDS 3349..4692  
/locus\_tag="wEsol\_01530"  
/codon\_start=1  
/transl\_table=11  
/pfam="DDE\_Tnp\_1"  
/fullproduct="qcoverage 100 , hcoverage 100 , similarity  
99.8 , identity 99.8 , evaluate 0.0 , alnlength 447 ,  
Bacteria , Proteobacteria , AGJ99681.1 Transposase, IS4  
family [Wolbachia endosymbiont of Drosophila simulans  
wHa]"  
/translation="MRELTMDRIACLSKDLNEFFNEKADEISIAVGFIKRKRKLNSS  
FIKAMVFGNIGVDDCSIETMCQLLNEDSIEITKQGLDFRFSEEAVEFMKKMYNEALCL  
FKKSLQIDCKILQQFGSVKLLDSSYISLPISMEDMYKGYGSSYRDCENNTKSGIKLQL  
VFDYLNQALDKLNFMEGIRSDQGYRDYLNGLSANDLLIFDLGYFVPSSFQIDEAGAY  
FVSRYKSDTNIYDIETNQKIELLEYLEGQLSSEKEVLLGKEVKIKVRIICQKLTEEQS  
MARRRKANKLAKSHGYTSSQKNQKLLDWSIFITNPESKINAEQILTIVYRVRWQIELL  
FKLYKSHINLDKLGKTNPFRLCELYAKLCAILVFHGMIGCVKCLKNTELSLTKAFI  
ELKRRVRELFILNINNNLKIFLKKLTIIWSKFSKLDYRKTRVSTLSSLHSLT"  
/product="Transposase, IS4 family"  
/besthit="qcoverage 100 , hcoverage 100 , similarity 99.8  
, identity 99.8 , evaluate 0.0 , alnlength 447 , Bacteria ,  
Proteobacteria , AGJ99681.1 Transposase, IS4 family  
[Wolbachia endosymbiont of Drosophila simulans wHa]"  
gene complement(5138..5353)

CDS

```

/locus_tag="wEsol_01531"
complement(5138..5353)
/locus_tag="wEsol_01531"
/codon_start=1
/transl_table=11
/fullproduct="qcoverage 98.5915492957747 , hcoverage
98.5915492957747 , similarity 100 , identity 100 , evaluate
8.95e-35 , alnlength 70 , Bacteria , Proteobacteria ,
QEF50080.1 hypothetical protein EA652_0377 [Wolbachia
endosymbiont of Drosophila ananassae]"
/translation="MVYNYSHLPKLPCTAFNSPASVSPTPVSNCAQACAPAYAPCATN
SCHNHFNFSYHNYDTCNPNPCDEFGFLC"
/product="hypothetical protein"
/besthit="qcoverage 98.5915492957747 , hcoverage
98.5915492957747 , similarity 100 , identity 100 , evaluate
8.95e-35 , alnlength 70 , Bacteria , Proteobacteria ,
QEF50080.1 hypothetical protein EA652_0377 [Wolbachia
endosymbiont of Drosophila ananassae]"

```

gene

CDS

```

complement(5667..7448)
/locus_tag="wEsol_01532"
complement(5667..7448)
/locus_tag="wEsol_01532"
/codon_start=1
/transl_table=11
/pfam="ATP-synt_B ATP-synt_B"
/fullproduct="qcoverage 100 , hcoverage 107.622504537205
, similarity 91.9 , identity 91.9 , evaluate 6.07e-244 ,
alnlength 593 , Bacteria , Proteobacteria ,
WP_015589072.1 MULTISPECIES: hypothetical protein
[unclassified Wolbachia]"
/translation="MLKHNYSDKINNRYSYTNKFSYSDEGVDETIKDKITTEDQVVTD
DQVVTTDDKVVTEDQVTGLRDQIEKEKKDDEFTRETLEECKDRAKKAEDGAKKAVKRAE
DDAKKAIAKQAHGEAKEAKEQFAKCEKDAERIKEDAGKAINQAKNDAKAEAAEAVKQAH
GEAKEAKEQFAKCEKDAERIKDDAKAKAAEAVKQAHGEAKEAKEQFAKCEKDAERIKD
DAKQAIERAKDDAKAKADLAIKQAQDEIEKVKAQAKADAGKAKEEAEIGIKEAFVQ
CEKKVEKAKEEVVKCKIGMAKAEVEWYKKEAECKKEKGIGTGKPDTEGKGDETGTNK
PDTDEKEDETGKASVITSQEITLDCSQAENCGAYASWYTAYNKIGHQGFNTSDLLKEL
YPEMYSNPKIATYIEKGIEGYYGVVNFKFAFTELFDSAHYFSNMCKKCMNDNPQEIAC
QDDEIKSFCYPAGYHNNKEYNKSFFMRESCPDLIRESDRITIVAKAKQIAPLILVNTLG
QMIDKEGNNTQILYSSLKPYLKANGKIKDCGVDKKCEDFAKIMKKVAVDSDKEVLLKT
VFDSTEKTNPYYDNEDSLVSVDTNFI"
/product="hypothetical protein"
/besthit="qcoverage 100 , hcoverage 107.622504537205 ,
similarity 91.9 , identity 91.9 , evaluate 6.07e-244 ,
alnlength 593 , Bacteria , Proteobacteria ,
WP_015589072.1 MULTISPECIES: hypothetical protein
[unclassified Wolbachia]"

```

gene

CDS

```

complement(7681..9390)
/locus_tag="wEsol_01533"
complement(7681..9390)
/locus_tag="wEsol_01533"
/codon_start=1
/transl_table=11
/fullproduct="qcoverage 100 , hcoverage 100 , similarity
100 , identity 100 , evaluate 0.0 , alnlength 569 ,
Bacteria , Proteobacteria , WP_015589073.1 MULTISPECIES:
ATP-binding cassette domain-containing protein
[unclassified Wolbachia]"
/cog="MdlB COG1132 567 ABC-type multidrug transport
system, ATPase and permease components"

```

```

/pfam="ABC_membrane Pfam-B_15301 DUF258 AAA_29 AAA_16
AAA_22 AAA_14 Zeta_toxin AAA_18 Pfam-B_16450 AAA_17
AAA_21 ABC_tran SMC_N Pfam-B_6534 Pfam-B_5913"
/tigr="TIGR02204 MsbA_rel 576 ABC transporter,
permease/ATP-binding protein"
/product="ATP-binding
cassette domain-containing protein"
/translation="MRSNIRQLFYIYIKPNLSYFIIAFIAVLFSALMILLFGRGLSNII
DSGTEHDFTTKLLVAILIVLAISLTAFTRLYFIGIGSEKVIARIRYDLYSSITNLQPS
FFENTGVQDVISALVTDTSVLQSIINSSLLTILRNFVILIGSVAMLLYTNIQLTAYAA
AIIPILLIIMTSLGKKVRSYARFAQDKLSELASFSEENFRSIVTIKSFVLEENEKIRF
KEHLNSVSKSYVKLVLLRAILVTLVITCVIGSLVLLFFGIKEVLSNNITIGKLSSFV
FYSALAAGAINNLSDNISDLQRLGIVERLFEFKNMKSSIADPDDPIKICSVQKGISF
NGVTFFYESQSDKPALNNVSFSIEAGQAVSIVGPSGSGKSTILKLLRFHDPNKGSI
IDGHNIKSIALNDRSLFGLVPQDHMIFSCSIMENILYGKPGAEEYEVKQAAISAYAM
EFIDKLPDKFDTFVGKRGKLKLEGGQKQRIVIARAILNNPQVLILDEATSALDYKSEN
VQKALSKLMQNRTTIVITHRLSTALKTDKIIVINHGKVEEVGTHDSLISKDGLYAKLA
KIQ"
/besthit="qcoverage 100 , hcoverage 100 , similarity 100
, identity 100 , evalue 0.0 , alnlength 569 , Bacteria ,
Proteobacteria , WP_015589073.1 MULTISPECIES: ATP-binding
cassette domain-containing protein [unclassified
Wolbachia]"
gene 10165..10410
/locus_tag="wEsol_01534"
CDS 10165..10410
/locus_tag="wEsol_01534"
/codon_start=1
/transl_table=11
/product="hypothetical protein"
/translation="MNRGMTVRGGVTISSSSHYVLGSMRLRDTANESRYDSVDSNSSF
RYVLGSRNTVNESRYDGLRWYDDKLVIPLRVSAAAV"
/besthit="qcoverage 58.0246913580247 , hcoverage
95.9183673469388 , similarity 76.6 , identity 74.5 ,
evalue 5.46e-10 , alnlength 47 , Bacteria ,
Proteobacteria , WP_179943749.1 hypothetical protein
[Wolbachia pipientis]"
gene 10485..>10932
/locus_tag="wEsol_01535"
CDS 10485..>10932
/locus_tag="wEsol_01535"
/codon_start=1
/transl_table=11
/product="hypothetical protein"
/pfam="PDDEXK_2"
/tigr="TIGR01784 T_den_put_tspse 273 conserved
hypothetical protein"
/translation="MALSKFLDPKLDLTFKKIFGTERNKNILIHFLNDILGCTEVNTI
QEVEFLSTIMDPEIASDKQSIQDVLCRDSSGNRYIIEMQLTRDKGFQKRAQLYAAKAY
SRQADKSGKYVDLKKIFFIAISNCTLFDPDKLDYISSHTIRDEKTNEH"
/besthit="qcoverage 100 , hcoverage 51.9163763066202 ,
similarity 100 , identity 100 , evalue 1.92e-98 ,
alnlength 149 , Bacteria , Proteobacteria ,
WP_213862937.1 Rpn family recombination-promoting
nuclease/putative transposase [Wolbachia endosymbiont of
Rhagoletis cerasi]"
gene 5546..5615
/locus_tag="wEsol_tRNA-28"
tRNA 5546..5615
/locus_tag="wEsol_tRNA-28"

```

```

/gene="tRNA-Tyr"
/intronpos="0..0"
/program="tRNAscan-SE"
/cove_score="35.3"
/evidence=predicted
/type="Tyr"
/anticodon=GTA
/product="tRNA-Tyr (GTA) "

```

# ORIGIN

```

1  aataaaactat aacatthttta cttaatthttg tcaactttctc tattcgtttga aaaaacaatc
61  ttgcataaaa aaatcaactc atctctttcca aaggctctat attgaagata gaaagtccag
121 aagcgatgac gtgcgctaag gcttgcacga gaaacattct tgcagcgggtg aggtttaagt
181 tgtctttccag tatgaaacgc atgttttaaat cactcttgcc atacccccat aaaacgtgaa
241 acgctttctgc aacttcaagt aagtagaaaag taattctgtg tggctcacia agccttgctg
301 caattttctac cacatctggc cacttttgcta aggtttttat gaggaagagc tctccacctg
361 tccttaaaaag tgaaggatct gctgttggga gctcttttgg agcattacgc attaacgaat
421 gagcacgagc atgcgcataat tgcacgtaaa aaatagggtt gtcttttgac tgttctttaa
481 ctttagcaaa atcaaagtcc aagaccataat cattcttgcg tgttagcatt ataaaacgag
541 ttatgtccct gccaaacttct tccactacat cccttgctgt gaggaatttt cctgatcttt
601 tggacatctt aacagggtttg ccgtttctcga aaaaattcac aatattatgc agttttacct
661 ctattttttgc ttgatcatca ctgagcgcag agacgactgc tttgagtctt ttgacataac
721 cgccgtgggtc actaccaagc tctacgatca tattgttaaa accacgcgat atcttatcaa
781 aatggtaagc gatatccgag gcaaaataag tccaactgcc gtctcttttc ttcaatgcac
841 ggtcaacgct atcaccaaat tttgtagagc gaaatagcat ctcttttctg gaagtccaat
901 tttcgctttc tttgcctttt ggtttctcca ggtacccttc atacactaga cccttgtcag
961 acaatatctt tatactctct tcaatthttgc cactthtttg tagctcatac tctgaagtaa
1021 aaacatcatg atttactcca agtaagttca tgtcttcctt tataatthct aagatagaac
1081 ttaaagtata gtctctaata acttgattat ctgctthttc tagaagctct gcgccatatt
1141 ttttggccag cccctcccct atcggtthtt aatattcacc tgggtataaa cctthttcaa
1201 cactaattth ttctcccaga gcttctthtt atcgcaaata cactgaccga attagcgtat
1261 ctatctgtgc tccagcatca ttaatatagt attccttagt aactthtata ccaactthtt
1321 tcaataaatt tgccagaacg tcaccaaata ctgcccctct tgcattgacca atatgcagtg
1381 gaccagttgg atttgagatg acaaattcaa cattgatggc ctgattgttc cctatatcta
1441 gggtgccaaa ctctgtthtt agctcattth tttgtthttaa aattccatgc cacacttcta
1501 tttttaagtg catgttgatg aaaccagagc ctgctattth cactthttgca acttcatcaa
1561 aaagttcaaa ttctthtggc aaaacctctg caattthcaat gggattcttc ttttcatgct
1621 ttgcaagcac catagcaaca tttgtgtaaa tgtctccatg gactctattg cttggaggct
1681 ctatgataaa gtttgctgca cttgtgctta taacaccctt ttgtthtcaa tcattcaatt
1741 tactaaagat tagagaggaa atctgcttaa aaatgttcat tcactatatt gctataaaat
1801 ctatagcagt atagtgaata agtgggacta gttgaagggt tatcttaact atthttatctt
1861 cctggatcag agthttatatt aagtcgttgc cgtaaccatg gtaagagaaa gccatacctt
1921 cgctgtaacc atcattacca gcacagggt cttcaacatc atcaggthct ttaacatcat
1981 caggthctth aacatcatca ggctctthct cthttctcag thcattctta atactthctt
2041 tcagthttatt catagtctta tcatcaatct cacacttaag acctthcttc agthtcattct
2101 taatactthc thttcagthta thcatagtct tatcatcaat ctcacactta agacctthct
2161 tcagthtcatt cttaatatth tctthtcagth cattcttagt ctatcatca atctcacact
2221 taagacctth ctccagthta thcttaatat thttctthcag thcattctta gtcttatcat
2281 caatctcaca cttaagacct thctccagth cattcttaat atthttctth agthtcattct
2341 tagtcttata atcaatctca cacttaagac cthttctccag thcattctta atatthttctt
2401 tcagthtcatt cttagtctta tcatcaatct caaacttaaa acatthttth agthtcattca
2461 tagtcttata atcaatctta cacttaagat cthttaccaca thtatcataa atcaacttac
2521 ccttattgac thttacaatca tccaactthg tgaacaaatt aatthttcac atatcactga
2581 catagcacgt atcaagtggc aatatacgta catgattthg atthtttgat tccgacaaga
2641 aaaagtattc gttggcataa aatatctcca ttagtaaaata aaattattaa aaaattaacc
2701 ataagatgga agtgtgtact aacaatgtac acactgtatt actthttata aatatgaaca
2761 gtgcctthcta aactgacat attgtgggta gaaaaaaagg cthtcagcact thttgcatct
2821 aatatagaag agthttattac thctacacat thtatcacatt cagaattgtt thcacaactg
2881 cccacaagth taccatctat aacctgaagg thgtthtttag cattctgaat agthtttgca
2941 cattctthta acttgtagcc tgttggctct ctggtctcaa tatcaagaat atcatcagth
3001 attgggttga ccgttattgc aagctthtga aaatcaacga thgtthttaga thtcaggthta

```

|      |             |             |             |             |             |             |
|------|-------------|-------------|-------------|-------------|-------------|-------------|
| 3061 | ggcttaactt  | gtggacaagg  | gggacaagca  | ggacaagcag  | gagcaggggg  | acaaacagta  |
| 3121 | tcaggacaag  | caggacaagg  | tggtatat    | aaatcgaatt  | cgggaagctg  | tatatattaat |
| 3181 | tcgagtccat  | catgccgcga  | gtcaaagcgg  | ttatggcaac  | gtgggtcaaa  | gttatgatgg  |
| 3241 | taccgtgggt  | cagttatgca  | agccatacgc  | gtcaagttaa  | ggaaaagtgt  | aagtaaagtt  |
| 3301 | gatagagtga  | aggaaaataa  | taagggtataa | attctcttgg  | atatatgaat  | gagagaactt  |
| 3361 | acaatggaca  | gaatagcttg  | cttatcaaaa  | gacctcaatg  | aattcttttaa | tgaaaaagca  |
| 3421 | gacgaaatat  | caattgcagt  | aggttttata  | aaaagaaaga  | gaaaacttaa  | tggctcatca  |
| 3481 | ttcataaaag  | ctatggtttt  | tggtaacata  | ggagttgatg  | attgcagcat  | agaaacaatg  |
| 3541 | tgccaattgc  | taaatgaaga  | ctcgatagaa  | attacaaaac  | agggtttaga  | tttttaggtt  |
| 3601 | agtgaagaag  | cagttgagtt  | catgaaaaaa  | atgtataacg  | aagctttgtg  | tttatttaaa  |
| 3661 | aaaagtctac  | agattgattg  | caaaatttta  | cagcaatttg  | gaagcgttaa  | attattggat  |
| 3721 | agcagctaca  | ttagcctgcc  | cattagcatg  | gaagatatgt  | acaaaggata  | tggcagtagc  |
| 3781 | tatagagatt  | gcgagaataa  | taccaaatac  | ggaataaagc  | tacagttagt  | ctttgattac  |
| 3841 | ctgaatcaag  | cgctagataa  | gttaaatttt  | atggaaggaa  | taaggctcga  | tcaaggttat  |
| 3901 | agggattatc  | tgaacggttt  | atcagccaat  | gatttgctaa  | tatttgactt  | gggctacttt  |
| 3961 | gtgcctagtt  | cttttaaaca  | gattgatgaa  | gcaggtgcat  | attttgttag  | tcgttataag  |
| 4021 | tctgatacca  | atatatatga  | tatagaaaca  | aatcaaaaaa  | tagagctatt  | ggagtatttg  |
| 4081 | gaaggtcaat  | tatcttcaga  | aaaagaagta  | ttattaggaa  | aggaagtaaa  | aattaaggta  |
| 4141 | agaattatat  | gtcaaaaagc  | aactgaagaa  | cagtctatgg  | ctagaagaag  | aaaggcta    |
| 4201 | aaattagcaa  | agtcacatgg  | atatacatct  | tctcaaaaaga | atcaaaaagt  | attagattgg  |
| 4261 | tcaatattta  | taactaatgt  | tccagagagt  | aaaattaatg  | ctgaacaaat  | attgacggtt  |
| 4321 | tatagagtaa  | gatggcaaat  | cgaattacta  | tttaaactat  | ataaaaagtc  | tatcaatctt  |
| 4381 | gataaactaa  | aaggaaagac  | aatccatttt  | agagtattgt  | gcgagctata  | cgcaaaatta  |
| 4441 | tgtgctattc  | tcgtatttca  | cggaatgatt  | ggctgtgtaa  | aactaaaaaa  | gaacacggag  |
| 4501 | ctcagtttaa  | caaaggcatt  | tattgaattg  | aaaaggcggg  | ttagagagct  | ctttttgata  |
| 4561 | ttaaacaata  | ttgtcaataa  | tttaaaaatt  | tttctaaaaa  | agcttactat  | aatctgggtca |
| 4621 | aagttttctt  | tgaaagacag  | atataggaag  | accagggtat  | ctactttaag  | ctctctacat  |
| 4681 | tccttaactt  | gacgcgtatg  | gttatgcaag  | ctgtgcgcac  | aggagtacat  | gaatccatac  |
| 4741 | gtggatacga  | agaaaaattg  | taagtcataa  | aaatccttta  | aaaagcaact  | attagattat  |
| 4801 | tataggataa  | aaaagttaat  | gatttaataa  | ttttaaggct  | aaaattagca  | tatacaaagt  |
| 4861 | ccttaaccta  | cagtacattt  | caaaatacga  | ctttaatgta  | gcagatatta  | gagttaaaag  |
| 4921 | ttttactatg  | gtagaataat  | gataagattc  | caagaagaag  | ctgtcagtag  | tcaaattagt  |
| 4981 | cgtgttgctg  | aaataaattg  | taatatatgg  | ttactgtgaa  | taacaattgc  | ttatcttctc  |
| 5041 | aagcaaaaaca | tgaaacacat  | gggttggaata | acacccatgt  | gctcttgga   | gcacgtatag  |
| 5101 | ctagacgtgc  | gtttatgagt  | tgtttaaaaa  | caatcttcta  | acaaagaaac  | ccaaattcat  |
| 5161 | cacaaggatt  | atgacatgtg  | tcataataat  | tatgatataga | gttaaaatga  | ttgtggcacg  |
| 5221 | aattagtagc  | acaagggtgcg | tatgcagggtg | cacaagcttg  | tgcacagttc  | gatactgggtg |
| 5281 | ttgggtgaaac | tgatgctggc  | gaattaaaaag | ccgtacatgg  | tagttttggg  | aatgacttat  |
| 5341 | aattataaac  | cataatgatc  | ctttaaaaaaa | tactatgaga  | ttattataaa  | ttaaaataat  |
| 5401 | taaaaatttta | ataattttta  | ttataaatct  | agcatatcaa  | ctaacggtat  | gattttaaatt |
| 5461 | ttttttcaac  | tccactgtat  | cttcgccagt  | tttgcataca  | tcccgtcttc  | acttattaga  |
| 5521 | gagttgtgag  | ttcctattgg  | caaccgtagc  | tcagttggca  | gagcgttagt  | ttgtagtgtc  |
| 5581 | gaatgtcgcc  | agttcgatcc  | tggttactca  | ctctattttt  | ctgcaaaaat  | gccatctggg  |
| 5641 | ctgaaaagcc  | cagaaagcat  | tcagtcttat  | ataaaaattag | tatcaacaga  | aacaagacta  |
| 5701 | tcctcattat  | cataatagta  | aggatttgtt  | ttttccgtac  | tatcaaaaac  | agtttttaat  |
| 5761 | agtacttcct  | tatcactgtc  | ccatgcaact  | ttcttcataa  | ttttagcaaa  | atcttcacac  |
| 5821 | tttttgtcaa  | ctccacagtc  | ctttatttttg | ccattagcct  | ttagataagg  | ctttaatgaa  |
| 5881 | ctatacaata  | tctgagtgtt  | attgccctct  | ttatctatca  | tttgtcctaa  | tgtgttaaca  |
| 5941 | agtatcaatg  | gtgcaatttg  | ttttgctttc  | gcaacaattg  | ttcgatcgga  | ctctctaattg |
| 6001 | agatcaggac  | atgattctct  | cataaaaaaag | cttttgttgt  | attcttttatt | attatgataa  |
| 6061 | ccggcagggg  | aacagaaaact | cttaattttca | tcgtcttgac  | aggctatctc  | ttgtggatta  |
| 6121 | tccatacat   | ttttacatga  | catattacta  | aaatagtgtg  | ctgaatcaaa  | aagctctgta  |
| 6181 | aaggcaaatt  | taaaattttac | tacaccgtaa  | taaccctcta  | ttcccttttc  | tatatatgtc  |
| 6241 | gcaatttttag | gattactata  | catctcagga  | tacaattcct  | ttagtaaatc  | agatgtatta  |
| 6301 | aaaccttgat  | gacctatctt  | attataagct  | gtataccaag  | aagcatatgc  | tccacaattt  |
| 6361 | tcagcttggg  | aacaatctaa  | ggttattttct | tgagatgtaa  | tgacacttgc  | ttttccagtt  |
| 6421 | tcatcttctt  | tctcatcagt  | atcagggtttg | tttgtaccag  | tttcatctcc  | tttttcacca  |
| 6481 | gtatcagggt  | tgccctgtacc | aattccctttc | tcttttttgc  | attcttcagc  | ttctttttta  |
| 6541 | taccactcaa  | cctctgcctt  | tgccattcca  | atttttacact | ttacaacttc  | ttcttttggt  |
| 6601 | ttctcaactt  | tctttttcaca | ctgtacaaat  | gcttctttta  | tcccttcagc  | ctcctctttt  |

|       |             |             |             |             |             |             |
|-------|-------------|-------------|-------------|-------------|-------------|-------------|
| 6661  | gcttttccag  | cgtctgcttt  | tgcttgcttt  | gcttctgctt  | tcactttttc  | aatctcatct  |
| 6721  | tgagcttggt  | ttattgctaa  | atcggtcttt  | gcttttagcat | catctttttg  | acgttctatt  |
| 6781  | gcctgttttag | catcatcttt  | tatcctctca  | gcactttttt  | cacatttcgc  | aaactgctct  |
| 6841  | tttgcttctt  | tagcttcacc  | atgtgcttgt  | tttactgctt  | ccgcagcttt  | tgcttttagca |
| 6901  | tcacttttta  | tcctctcagc  | atctttttca  | catttcgcaa  | actgctcttt  | tgcttcttta  |
| 6961  | gcttcaccat  | gtgcttgctt  | tactgcttcc  | gcagcttctg  | cttttagcatc | attctttggc  |
| 7021  | tgattgattg  | cctttccagc  | gtcttctttt  | atcctctcag  | catctttttc  | acatttcgca  |
| 7081  | aactgttctt  | ttgcttcttt  | agcttcacca  | tgtgcttgtt  | ttattgcctt  | tttagcatca  |
| 7141  | tcttctgcac  | gttttactgc  | cttttttagca | ccatcttctg  | ccttcttagc  | cctgtctttg  |
| 7201  | cactcttcaa  | gtgtttctct  | ggtaaattca  | tcactctttt  | tctctttttc  | gatctgatct  |
| 7261  | cttagaccgc  | taacctgatc  | ctcagttact  | accttatcat  | cagttactac  | ctgatcatca  |
| 7321  | gttactacct  | gatcttcagt  | tgtgatttta  | tccttgatcg  | tctcatctac  | acctcatca   |
| 7381  | ctataagaaa  | atltgttagt  | atatgaatag  | cgattattga  | ttttatcact  | atagttatgt  |
| 7441  | tttaacatag  | agacctccta  | tacagttaaa  | attggaatta  | cattaagata  | gaacaagcta  |
| 7501  | tgaatataac  | gtgaatgaaa  | gaaaccacag  | gtcacgaaat  | ttccggataa  | ctatggaacc  |
| 7561  | attataaaat  | aataaaatta  | aaaaattaat  | aatttttaatt | ttaattttta  | atctagcata  |
| 7621  | ctcattaaat  | caacaacgat  | atagcttaaa  | ttctctttta  | atttacacaa  | tatttcatgc  |
| 7681  | ctactgtatc  | ttcgccagtt  | ttgcatacag  | cccgctctta  | cttatttagag | agtcatgagt  |
| 7741  | tcctacttct  | tctacttttc  | catgattaat  | tactataatc  | ttgtcagctc  | tgagtgcggt  |
| 7801  | tgatagcctg  | tgtgtaatta  | cgattgttgt  | tctgttttgc  | attaacttgc  | tcaaggcttt  |
| 7861  | ttgcacgagg  | ttctcacttt  | tgtaatcaag  | ggcagagggt  | gcttcatcca  | gtattaaaac  |
| 7921  | ctgaggattg  | ttgagtatgg  | cccttgctat  | tacaatacgt  | tgtttttgtc  | cttcagaaag  |
| 7981  | ttttaatcct  | ctttttccta  | caaagtatc   | aaatttatca  | ggcagcttat  | caataaatcc  |
| 8041  | catcgcataa  | gcgctgatgg  | ctgcttgctt  | cacttctctca | tattcggcac  | ctggtttggc  |
| 8101  | atatagtata  | ttttccatta  | ttgagcaaga  | aaatatcatg  | tgatcttgtg  | gcactaagcc  |
| 8161  | aaacaacgat  | ctgaggtcac  | ttagcgcaat  | tgacttaata  | ttgtgcccac  | cgatagtaat  |
| 8221  | gctacctttg  | tttgatcat   | gaaaacggag  | cagaagcttt  | aaaatggtgc  | ttttaccact  |
| 8281  | gccagatggt  | ccaacaattg  | atactgcttg  | acctgcctct  | atagaaaatg  | atacgttatt  |
| 8341  | taacgctggc  | ttatcagact  | gagattcata  | aaaaaatggt  | acgccattaa  | acgaaattcc  |
| 8401  | cttttgaaca  | ctacaaatth  | ttataggatc  | atcgggatct  | gctatagagc  | ttttcatatt  |
| 8461  | tttaaattca  | aataaacgct  | ctactattcc  | aagacctcgt  | tgtaaatcac  | tgatattatc  |
| 8521  | gctcaaatth  | tttatagctc  | ctgctgagag  | cgctgaataa  | aacacaaatg  | aggagagttt  |
| 8581  | tccaatagtt  | atattattgc  | ttaagacttc  | tttaataacca | aaaaagagca  | aaacaactag  |
| 8641  | tgaacctatc  | acacacgtga  | taactagagt  | tactaaaata  | gcacgcaaga  | gtactaatth  |
| 8701  | tacgtatgat  | tttgatactg  | agtttaaatg  | ttccttaaaa  | cggatttttt  | cgttttcctc  |
| 8761  | gagtacaaac  | gattttgatag | tcactataga  | tctaaaatth  | tcctcactaa  | atgacgcaag  |
| 8821  | ctcacttaat  | ttatcctggg  | caaagcgtgc  | atagctacgc  | actttttttc  | caagtgaggt  |
| 8881  | catgataatg  | agtagtatag  | gtattattgc  | ggctgcatac  | gcagtttagtt | gtatatttgt  |
| 8941  | atacaataac  | atagcaacac  | taccaatcag  | aatcacaaaa  | tttcgtaata  | tggtttagtaa |
| 9001  | gctgctgttt  | attattgatt  | gcagcacaga  | ggatatcagta | actaacgctg  | aaataacatc  |
| 9061  | ttgtacgcct  | gtgtttctca  | agaaacttgg  | ttgcaagtta  | gtgatactgc  | tatataagtc  |
| 9121  | atatctgatt  | cttgcgataa  | ctttctcgct  | gccaatgcc   | atgaaatata  | accgagtaaa  |
| 9181  | tgacgtgaga  | gaaatggcta  | aaactataag  | tattgcaact  | aatagtttgg  | tagtaaaatc  |
| 9241  | gtgctctgtg  | ccagaatcaa  | ttatattgct  | taagcctctg  | caaagagga   | ggatcattaa  |
| 9301  | ggctgaaaat  | aaaactgcaa  | taaaagctat  | gatgaaaata  | gatagattag  | gctttatata  |
| 9361  | gtaaaataac  | tgccataatat | tagatcgcac  | cttattttta  | agtttctaaa  | gttaagtata  |
| 9421  | tagattctag  | tttcagggga  | aagggaaaag  | gtgtagtatg  | aagcaattta  | ggttctgcag  |
| 9481  | ctgttgtgat  | tttagtccac  | caagaaaggg  | tagtagctcg  | cagaaacaaa  | aaacttgctt  |
| 9541  | gacaaactcc  | gccagccctc  | ttatcatgaa  | actgaagcta  | ttgtattttg  | tttcgccaat  |
| 9601  | ctgcagatta  | aaaggtaagg  | attacttaat  | gtatcggcgt  | cttatgttca  | atthtttgca  |
| 9661  | gtatatagat  | actgtatgtc  | tttacaaaa   | ttcatctaca  | tctagatttt  | tatctaaata  |
| 9721  | agctgaacgc  | gcttataaa   | cgttacaaga  | catcaaaaaa  | tgccaataact | cgacagagat  |
| 9781  | agtaaaagac  | tagctaaactc | gggaattctt  | tgtctttttt  | tctgcttagt  | aaatttctta  |
| 9841  | aacatttgca  | gcgtaggtta  | gttgcaatta  | aaagcagcta  | aattgcagtg  | tttaagactt  |
| 9901  | aaaaaacgcc  | aatactgaaa  | atagacaatg  | actaggggtt  | cttttgccct  | tttttcgtht  |
| 9961  | ggtaaatthc  | ttaatattht  | tagctaaacg  | acaatcgthc  | tcccgtacgc  | tgtagcggtg  |
| 10021 | atctatgtta  | aggtatgacg  | gttaagtaag  | ggatctatgt  | taagagatac  | cgcggtcggt  |
| 10081 | tgacggttcg  | cggtcggtg   | acgataagct  | cgatctcccg  | ctacgtgtta  | cggtgatctc  |
| 10141 | ttgttagcgg  | ctgagatacc  | gcgaatgaat  | cggtgtatga  | cggttcgcgg  | cggtgtgacg  |
| 10201 | ataagctcgt  | catcccacta  | cgtgttagcgt | ggatctatgt  | tgagagatac  | cgcaatgaa   |

```

10261 tcgcggtatg acagtgtaga tagtaattcg tcattccgct acgtgttagc gggatctaga
10321 aataccgtga atgaatcgcg gtatgacggg ttgcggtggg atgacgataa gctcgtcatc
10381 ccgctacgtg ttagcgccgc agcgggtatag ctatacttaa aaatatgggt gaatagttgt
10441 taataatagt gtataattat taatcttttc tcagtatttt tactatgggt ctttctaaat
10501 ttctcgatcc aaaattggac ctaacattta aaaaaatatt tgggtactgag agaaataaga
10561 atattcttat tcattttttg aacgatattt taggatgtac tgaagtcaac actatacaag
10621 aagtagaatt cttaagcacc attatggacc ctgaaattgc ttctgataaa caaagcattg
10681 ttgatgttct ttgcagggat tctagtggga acaggatat aattgagatg cagctcactc
10741 gtgataaagg ctttgaaaaa cgtgcacaac tttatgctgc taaggcttac tcaagacaag
10801 ctgataaatc tggtaaatac gttgatttaa agaagatttt ctttatcgcg atttcaaatt
10861 gtaccttatt ccctgataag cttgactata tatctagcca taccataaga gatgagaaaa
10921 ccaatgagca tg

```

//

```

LOCUS      JAQZAU010000131          17023 bp    dna        linear    ENV 17-MAR-2023
DEFINITION MAG: Wolbachia pipientis isolate wEsol contig_59279, whole genome
            shotgun sequence.
ACCESSION  JAQZAU010000131  JAQZAU010000000
VERSION    JAQZAU010000131.1
DBLINK     BioProject: PRJNA929258
            BioSample: SAMN33142973
KEYWORDS   WGS; ENV; Metagenome Assembled Genome; MAG.
SOURCE     Wolbachia pipientis (insect metagenome)
ORGANISM   Wolbachia pipientis
            Bacteria; Pseudomonadota; Alphaproteobacteria; Rickettsiales;
            Anaplasmataceae; Wolbachieae; Wolbachia.
REFERENCE  1  (bases 1 to 17023)
AUTHORS    Fiutek,N., Couger,B.M., Roy,S., de la Torre,J.R. and Connor,E.F.
TITLE      Genomic assessment of the contribution of the Wolbachia
            endosymbiont of Eurosta solidaginis to gall-induction
JOURNAL    International Journal Molecular Sciences
REFERENCE  2  (bases 1 to 17023)
AUTHORS    Fiutek,N., Couger,B.M., Roy,S., de la Torre,J.R. and Connor,E.F.
TITLE      Direct Submission
JOURNAL    Submitted (10-FEB-2023) Biology, San Francisco State University,
            1600 Holloway Ave, San Francisco, CA 94132, USA
COMMENT    ##Genome-Assembly-Data-START##
            Assembly Date      :: JUN-2019
            Assembly Method    :: FLYE v. 06-2019
            Genome Representation :: Full
            Expected Final Version :: Yes
            Genome Coverage    :: 100.0x
            Sequencing Technology :: Illumina HiSeq; PacBio Sequel
            ##Genome-Assembly-Data-END##
FEATURES   Location/Qualifiers
            source              1..17023
                                 /organism="Wolbachia pipientis"
                                 /mol_type="genomic DNA"
                                 /submitter_seqid="contig_59279"
                                 /isolate="wEsol"
                                 /isolation_source="galls on Solidago altissima"
                                 /host="Eurosta solidaginis MN-2018-EFC"
                                 /db_xref="taxon:955"
                                 /environmental_sample
                                 /country="USA: Cowling Arboretum, Carleton College,
                                 Northfield, MN"
                                 /lat_lon="44.48 N 93.13 W"
                                 /altitude="280 m"
                                 /collection_date="2018-11"
                                 /metagenome_source="insect metagenome"
                                 /note="metagenomic"

```

```

gene      complement(31..342)
          /locus_tag="wEsol_01536"
CDS       complement(31..342)
          /locus_tag="wEsol_01536"
          /codon_start=1
          /transl_table=11
          /fullproduct="qcoverage 100 , hcoverage 100 , similarity
100 , identity 100 , evalue 1.60e-74 , alnlength 103 ,
Bacteria , Proteobacteria , WP_155968470.1 transposase
[Wolbachia pipientis]"
          /cog="COG3335 COG3335 132 Transposase and inactivated
derivatives"
          /pfam="DDE_3 DDE_1"
          /product="transposase"
          /translation="MTFKGGCDKEVFNTWLEKMLLPKLPHGTTIVMDNATFHKTPKTK
ELIDNARCRLLYLPTYSPDLNPIEHCWNTIKSRLRPLMHKYTDLQLLVGNTIMEIYHS
F"
          /besthit="qcoverage 100 , hcoverage 100 , similarity 100
, identity 100 , evalue 1.60e-74 , alnlength 103 ,
Bacteria , Proteobacteria , WP_155968470.1 transposase
[Wolbachia pipientis]"
gene      complement(542..889)
          /locus_tag="wEsol_01537"
CDS       complement(542..889)
          /locus_tag="wEsol_01537"
          /codon_start=1
          /transl_table=11
          /fullproduct="qcoverage 100 , hcoverage 100 , similarity
100 , identity 100 , evalue 2.74e-74 , alnlength 115 ,
Bacteria;Eukaryota , Proteobacteria;Arthropoda ,
WP_155968342.1 MULTISPECIES: IS630 transposase-related
protein [Wolbachia]"
          /cog="COG3415 COG3415 138 Transposase and inactivated
derivatives"
          /pfam="HTH_Tnp_IS630 HTH_Tnp_1 HTH_23 HTH_28 HTH_29 HTH_7
CENP-B_N Pfam-B_14738 HTH_8 HTH_17 HTH_24 Pfam-B_2106"
          /product="IS630
transposase-related protein"
          /translation="MAYSVDLRERAVSMIEKGKSKVEVAELLEIGIATLYRWLRKKAA
GESLRPSKNGSFIRKIDPKILEEYVKKNPDHTLAEMKQNLGFGINSIWYRLKQLRITL
KKSYSISRQSR"
          /besthit="qcoverage 100 , hcoverage 100 , similarity 100
, identity 100 , evalue 2.74e-74 , alnlength 115 ,
Bacteria;Eukaryota , Proteobacteria;Arthropoda ,
WP_155968342.1 MULTISPECIES: IS630 transposase-related
protein [Wolbachia]"
gene      1004..2332
          /locus_tag="wEsol_01538"
CDS       1004..2332
          /locus_tag="wEsol_01538"
          /codon_start=1
          /transl_table=11
          /fullproduct="qcoverage 100 , hcoverage 100 , similarity
100 , identity 99.5 , evalue 0.0 , alnlength 442 ,
Bacteria , Proteobacteria , WP_155969580.1 hypothetical
protein [Wolbachia pipientis]"
          /translation="MPRTTERHATVLNKLQSVIEHIDSKTAAERRLAIERWVKTYIRQ
VEYLEDDKLQFLYKMFRESCWSDTKLNNAILGQKLTEEKIEAIDNPFRCRYNMACRYC
VVDKIHPLFQEQFDSYKGRVSPDAVDMEGNPVNDKYIRNDLLDSMESYDPVFSFWIDR
ESEELKLKEYSNIGGFRKAVDFKWSQGVEYFYNNLLSEQQRKEEVTNAVITLSSIQSNF

```

NRATVLD FCLHKMDDSTKRELLVKLSEKDQGVYSLNGLIKWSFLD TVQDMIKRLCYE  
 EVSVPTDKILSGRDYGLLLSSLSNVILENPELSAQARSTIMGIWRCNRFSEHKKLVL  
 SDDKALVTPVFAAFITDWNRNKAGGDVGIKDQILEILRFAEENCSSEDLASFKDYVVN  
 DLKMVSMPGMVRNISYSKLMGELFYEVSVSSDLRTELASPGVSGLSSHSK"  
 /product="hypothetical protein"  
 /besthit="qcoverage 100 , hcoverage 100 , similarity 100  
 , identity 99.5 , evalue 0.0 , alnlength 442 , Bacteria ,  
 Proteobacteria , WP\_155969580.1 hypothetical protein  
 [Wolbachia pipientis]"  
 gene 2342..3631  
 /locus\_tag="wEsol\_01539"  
 CDS 2342..3631  
 /locus\_tag="wEsol\_01539"  
 /codon\_start=1  
 /transl\_table=11  
 /product="hypothetical protein"  
 /translation="MHNNGENIGLVRSLLDGEYQKFEERFESFLDQCPSFLHSVGKDR  
 FFPAFFFGMFATAFDSDIAKDSERIFFRFDNDPDNPRKGNLKVAILTEDRNGRQIVRC  
 YTIADRTNSIGSRFSEEEKQWVERKLQGDGTRRKLELEWEEYKIFVWAENLGEDEKE  
 EAIRCKRFEDEAFTQDSASLCDGFEEVVRTMQQGNLSNLLGRLASNNADYVFATIRN  
 VFNYIIDIYNRYNHVLD FNGKESDYHGFLSGFLMNFYRHTAGIYLELFVGGGYTDIT  
 FLIRGVDRRLRDSVPPIIIELKAGGESADQALEQAENYVIRCPVSSISIH TSSGSAVCVG  
 LNFDLDEDQRLRLSTQDFLDKGSSLLERLFNGSVDEIRENVRNYLLYPSFGVPAVPDV  
 RGTNSRVFSYTTGFAFASTAFAKKKDYGSRRKLGRCN"  
 /besthit="qcoverage 95.3379953379953 , hcoverage  
 56.5698478561549 , similarity 100 , identity 100 , evalue  
 5.47e-291 , alnlength 409 , Bacteria , Proteobacteria ,  
 WP\_155968908.1 hypothetical protein [Wolbachia  
 pipientis]"  
 gene 3597..4529  
 /locus\_tag="wEsol\_01540"  
 CDS 3597..4529  
 /locus\_tag="wEsol\_01540"  
 /codon\_start=1  
 /transl\_table=11  
 /product="hypothetical protein"  
 /translation="MVAGGNWVDVTKYLFNYHDNDKMLGPQGRVAQVNVRDRALTMVL  
 RALWQGEERIIVLDVRHALAHQFPIQGLDLRWP DARVYE VACTLNPRRRDEDDLGLA  
 VDVTPFQSPADYLQSKGNQSFQGE LLTIGGVSNIHSTANVMMNTGWQDINRHKALFQA  
 ISKVLFTLKWVVRNNAREVGFH SVLHGLFYTCDNPARIIIEFQLGGGEKIDLVLRS  
 AESRGGVHP IAKELKFADDYELQSKIQEANNQLNSYLQCRGYKRITDGD TVVLSYAIW  
 NDRAQRPD TLISVKDVLRIKDNLGHSSADDLPGR"  
 /besthit="qcoverage 100 , hcoverage 42.8769017980636 ,  
 similarity 100 , identity 100 , evalue 2.86e-224 ,  
 alnlength 310 , Bacteria , Proteobacteria ,  
 WP\_155968908.1 hypothetical protein [Wolbachia  
 pipientis]"  
 gene 4729..6888  
 /locus\_tag="wEsol\_01541"  
 CDS 4729..6888  
 /locus\_tag="wEsol\_01541"  
 /codon\_start=1  
 /transl\_table=11  
 /product="hypothetical protein"  
 /pfam="Pfam-B\_1571 Pfam-B\_6818"  
 /translation="MLGYISKDGQVCASDGLATEGQH TERFGQHTLEGSTSSLSKEQT  
 DDWNESIVEDKNTVVESYFIPENSILMNLANLLTESEKVS IKVRDLYVTIPDDHKAVP  
 PRGIVSIIIEVLKNLSNNSGLSINFPHTD VRSIILISKKS NLEFRLSFSSHDIYELYLR  
 MIDKESLEILSKEISLITASPF DGLPTIKMPALAQKSGKDN PSSSMDDNLTPLSEVDT  
 RLQSDEQGLQPEILSTSLTGTSTNKGREQDY LNDSEIVVASNMALNTSGIDGILDINP

```

FANLDEDRINTSTPTKQISLCEPSSISEYLVNESELSDRMNLKGASMAELIRLIAGV
FIDMRGIIEELSIPLLGQKIKDIREYLDKDFLSVVEELINERSKNRLQDKSEENHEACL
QQIYDLKSKLKIEERINSSIDQKNQQLTEKKLQAKDNQDFLGKCKELGNLLCDKHKE
LEEQCSTQQSLKERLGTLLAENKHLKEEIDGMNKFYKHLPERTEEEKSGATKIGKISKS
REVTQSNNGYHKEVKIEQELRQKIDEMQRKIGELLSENSMLLEELRSKCEQVGDAVES
LSTEISSFRSEQNLYNELEAVKRREELDNQDAEMYLKNGDLVNVTQGYSKKADNPTK
LTEQFKAVKSQLLMASTYSRKQMTYASVSLVLSGAFSVGASLTMFNLAICISLTVAAAL
TFLAVWCYCSYKASTALSNIEVDQIGNCVNLRRLQELR"
/besthit="qcoverage 90.2642559109875 , hcoverage
67.8870292887029 , similarity 72.7 , identity 60.4 ,
evalue 1.54e-212 , alnlength 649 , Bacteria ,
Proteobacteria , WP_141456775.1 hypothetical protein
[Wolbachia endosymbiont of Carposina sasakii]"
gene complement(7008..7319)
/locus_tag="wEsol_01542"
CDS complement(7008..7319)
/locus_tag="wEsol_01542"
/codon_start=1
/transl_table=11
/fullproduct="qcoverage 100 , hcoverage 100 , similarity
100 , identity 100 , evaluate 1.60e-74 , alnlength 103 ,
Bacteria , Proteobacteria , WP_155968470.1 transposase
[Wolbachia pipientis]"
/cog="COG3335 COG3335 132 Transposase and inactivated
derivatives"
/pfam="DDE_3 DDE_1"
/product="transposase"
/translation="MTFKGGCDKEVFNTWLEKMLLPKLPHGTTIVMDNATFHKTPTK
ELIDNARCRLLYLPTYSPDLNPIEHCWNTIKSRLRPLMHKYTDLQLLVGNTIMEIYHS
F"
/besthit="qcoverage 100 , hcoverage 100 , similarity 100
, identity 100 , evaluate 1.60e-74 , alnlength 103 ,
Bacteria , Proteobacteria , WP_155968470.1 transposase
[Wolbachia pipientis]"
gene complement(7519..7866)
/locus_tag="wEsol_01543"
CDS complement(7519..7866)
/locus_tag="wEsol_01543"
/codon_start=1
/transl_table=11
/fullproduct="qcoverage 100 , hcoverage 100 , similarity
100 , identity 100 , evaluate 2.74e-74 , alnlength 115 ,
Bacteria;Eukaryota , Proteobacteria;Arthropoda ,
WP_155968342.1 MULTISPECIES: IS630 transposase-related
protein [Wolbachia]"
/cog="COG3415 COG3415 138 Transposase and inactivated
derivatives"
/pfam="HTH_Tnp_IS630 HTH_Tnp_1 HTH_23 HTH_28 HTH_29 HTH_7
CENP-B_N Pfam-B_14738 HTH_8 HTH_17 HTH_24 Pfam-B_2106"
/product="IS630
transposase-related protein"
/translation="MAYSVDLRERAVSMIEKGKSKVEVAELLEIGIATLYRWLRKKAA
GESLRPSKNGSFIRKIDPKILEEYVKKNPDHTLAEMQNLFNGFINSIWYRLKQLRITL
KKSYSISRASRR"
/besthit="qcoverage 100 , hcoverage 100 , similarity 100
, identity 100 , evaluate 2.74e-74 , alnlength 115 ,
Bacteria;Eukaryota , Proteobacteria;Arthropoda ,
WP_155968342.1 MULTISPECIES: IS630 transposase-related
protein [Wolbachia]"
gene 7905..9305

```

CDS

```

/locus_tag="wEsol_01544"
7905..9305
/locus_tag="wEsol_01544"
/codon_start=1
/transl_table=11
/pfam="Pfam-B_6148 Pfam-B_13184 Pfam-B_2381 Pfam-B_7231
AAA_16 Arch_ATPase NB-ARC"
/fullproduct="qcoverage 100 , hcoverage 100 , similarity
100 , identity 100 , evalue 0.0 , alnlength 466 ,
Bacteria , Proteobacteria , WP_196770127.1 hypothetical
protein [Wolbachia pipientis]"
/translation="MGSTILSNRIFKKRDGTSTGDHGCKYEVKLLMLYLLYGLSSKID
FWLASNIEGFGAFDDIFFEYKDQKNKSRIILVQAKHRNDPSSSANITFEDLFIDGNNR
KRQKEDFGLNKYFESHPEIKQNPEYKNSDITLVIHANVNVNLKKGTEKQGVETLEEY
LEESKLTDDNILSIYEGHRGTCYKIKNHIELKKYFSCGSEDEIEDFLLRIRFVVNQPN
HSKLDDEIKKEIGSIYKISGKKNIDMVFDFAFGKVEKWWEQQGSEVSYLTRKDNFYKE
AIEHLYSLKLKEDLPEFWQVPLRNYNFVGREALLDKIEECLKANDTATLVACHGIGGI
GKTQLALEFIWSKLQKYRWIIWLDTRDRNTLINEYIKLGRGLNVIHGYRENVREEDHA
KHVKYWLEHPPERAGWLLICDNAPNYKDIADLLPIEGGKILLISRYTFGWPQPQNTISV
DVFEPPGESRSYICKIL"
/product="hypothetical protein"
/besthit="qcoverage 100 , hcoverage 100 , similarity 100
, identity 100 , evalue 0.0 , alnlength 466 , Bacteria ,
Proteobacteria , WP_196770127.1 hypothetical protein
[Wolbachia pipientis]"

```

gene

9354..9461

CDS

```

/locus_tag="wEsol_01545"
9354..9461
/locus_tag="wEsol_01545"
/codon_start=1
/transl_table=11
/product="hypothetical protein"
/pfam="HTH_Tnp_IS630"
/translation="MAYSVDLRERAVSMIEKGKSKVEVAELLEIGIATL"
/besthit="qcoverage 100 , hcoverage 52.2388059701493 ,
similarity 100 , identity 100 , evalue 3.26e-13 ,
alnlength 35 , Bacteria , Proteobacteria , WP_213863574.1
IS630 transposase-related protein, partial [Wolbachia
endosymbiont of Ceratitidis capitata]"

```

gene

9901..10212

CDS

```

/locus_tag="wEsol_01546"
9901..10212
/locus_tag="wEsol_01546"
/codon_start=1
/transl_table=11
/fullproduct="qcoverage 100 , hcoverage 100 , similarity
100 , identity 100 , evalue 1.60e-74 , alnlength 103 ,
Bacteria , Proteobacteria , WP_155968470.1 transposase
[Wolbachia pipientis]"
/cog="COG3335 COG3335 132 Transposase and inactivated
derivatives"
/pfam="DDE_3 DDE_1"
/product="transposase"
/translation="MTFKGGCDKEVFNTWLEKMLLPKLPHGTTIVMDNATFHKTPKTK
ELIDNARCRLLYLPTYSPDLNPIEHCWNTIKSRLRPLMHKYTDLQLLVGNTIMEIYHS
F"
/besthit="qcoverage 100 , hcoverage 100 , similarity 100
, identity 100 , evalue 1.60e-74 , alnlength 103 ,
Bacteria , Proteobacteria , WP_155968470.1 transposase
[Wolbachia pipientis]"

```

```

gene      complement(10249..10590)
          /locus_tag="wEsol_01547"
CDS       complement(10249..10590)
          /locus_tag="wEsol_01547"
          /codon_start=1
          /transl_table=11
          /fullproduct="qcoverage 100 , hcoverage 100 , similarity
100 , identity 100 , evalue 1.53e-79 , alnlength 113 ,
Bacteria , Proteobacteria , AAS13810.1 transposase, IS5
family, OrfB [Wolbachia endosymbiont of Drosophila
melanogaster]"
          /cog="COG3293 COG3293 124 Transposase and inactivated
derivatives"
          /pfam="DDE_Tnp_1_2 DDE_Tnp_1"
          /product="transposase, IS5 family, OrfB"
          /translation="MRTKYTKVKKMWADMGYQGRNLKNHIKEEYDIDIEIVKRPPCRF
WVHKDTPPELLPTREQGFKVQPRRWVVERTFAWVNRNRRLSKEYDLLTTSTENFIYLA
MSRVMLKREYA"
          /besthit="qcoverage 100 , hcoverage 100 , similarity 100
, identity 100 , evalue 1.53e-79 , alnlength 113 ,
Bacteria , Proteobacteria , AAS13810.1 transposase, IS5
family, OrfB [Wolbachia endosymbiont of Drosophila
melanogaster]"
gene      complement(10701..11081)
          /locus_tag="wEsol_01548"
CDS       complement(10701..11081)
          /locus_tag="wEsol_01548"
          /codon_start=1
          /transl_table=11
          /fullproduct="qcoverage 100 , hcoverage 100 , similarity
100 , identity 100 , evalue 1.16e-87 , alnlength 126 ,
Bacteria , Proteobacteria , AOV87106.1 transposase
[Wolbachia endosymbiont of Drosophila incompta]"
          /cog="COG3293 COG3293 124 Transposase and inactivated
derivatives"
          /pfam="DUF4096"
          /product="transposase"
          /translation="MRKKYPTDLSEREWARIEKHFRVSYKKGGRPPKYSKREILEAIF
YVLRGTGCQWRYLPNDFPLWKTVYEQFRQWKKQGIFEKMNIEITKYSRRKIGRNEQPSA
CIVDSQSVKTTEKGGSKAMMEVKK"
          /besthit="qcoverage 100 , hcoverage 100 , similarity 100
, identity 100 , evalue 1.16e-87 , alnlength 126 ,
Bacteria , Proteobacteria , AOV87106.1 transposase
[Wolbachia endosymbiont of Drosophila incompta]"
gene      11438..12169
          /locus_tag="wEsol_01549"
CDS       11438..12169
          /locus_tag="wEsol_01549"
          /codon_start=1
          /transl_table=11
          /fullproduct="qcoverage 100 , hcoverage 100 , similarity
100 , identity 100 , evalue 1.47e-154 , alnlength 243 ,
Bacteria , Proteobacteria , WP_155969427.1 MULTISPECIES:
ComF family protein [Wolbachia]"
          /cog="ComFC COG1040 225 Predicted
amidophosphoribosyltransferases"
          /pfam="DUF1258 Pribosyltran Pfam-B_17704"
          /tigr="TIGR00201 comF 190 comF family protein"
          /product="ComF family
protein"

```

```

/translation="MNLLLLKKATNLIFPSVCVSCECIIDENLNLCSCECNKKINFLTK
HYCNVCGVVISDNIYTCGKCIINPPPFKVLRSVFAYDQHSRNMIIINFKFFDNLNYVKI
YAKWIIHQANQDTFQNAEIIIIPIPLHKMRLFKRKYNQAALLAKELSKLSNLSYTPFAIK
RLRHTAPQAGLSLKQREKNLKKAFKTSNKKIIEKNKIVILVDDVVTGATVRSCSQEIL
NSGAKEVRVLSLARTVNDWTSCIKN"
/besthit="qcoverage 100 , hcoverage 100 , similarity 100
, identity 100 , evalue 1.47e-154 , alnlength 243 ,
Bacteria , Proteobacteria , WP_155969427.1 MULTISPECIES:
ComF family protein [Wolbachia]"
gene complement(12348..12755)
/locus_tag="wEsol_01550"
CDS complement(12348..12755)
/locus_tag="wEsol_01550"
/codon_start=1
/transl_table=11
/pfam="DDE_Tnp_1 DDE_Tnp_1_2 DDE_Tnp_1_2"
/fullproduct="qcoverage 100 , hcoverage 100 , similarity
100 , identity 100 , evalue 6.01e-92 , alnlength 135 ,
Bacteria , Proteobacteria , WP_051062209.1 MULTISPECIES:
transposase [Wolbachia]"
/translation="MLKEVDFQYVIKVLVYADRAYDREKLYKLCNQYGIKTKIPPKNNA
AEHPKLDYMAERNSAVKLIKSYDEDGIKKWKKEMSYGKRSYIEGFFSRLKKTFGFSFR
NKSEMNRERELLLKCYLLNKFTEIGMAKFEIAS"
/product="transposase"
/besthit="qcoverage 100 , hcoverage 100 , similarity 100
, identity 100 , evalue 6.01e-92 , alnlength 135 ,
Bacteria , Proteobacteria , WP_051062209.1 MULTISPECIES:
transposase [Wolbachia]"
gene complement(12775..12975)
/locus_tag="wEsol_01551"
CDS complement(12775..12975)
/locus_tag="wEsol_01551"
/codon_start=1
/transl_table=11
/fullproduct="qcoverage 100 , hcoverage 100 , similarity
98.5 , identity 98.5 , evalue 1.88e-36 , alnlength 66 ,
Bacteria , Proteobacteria , WP_010082383.1 MULTISPECIES:
hypothetical protein [Wolbachia]"
/translation="MIAENNMEDIEIAIDGTGISIYNNTPGHSKENSEDRKYRSYEQT
RKLHVMLNTNSKKAIAVKYSNG"
/product="hypothetical protein"
/besthit="qcoverage 100 , hcoverage 100 , similarity 98.5
, identity 98.5 , evalue 1.88e-36 , alnlength 66 ,
Bacteria , Proteobacteria , WP_010082383.1 MULTISPECIES:
hypothetical protein [Wolbachia]"
gene complement(12959..13288)
/locus_tag="wEsol_01552"
CDS complement(12959..13288)
/locus_tag="wEsol_01552"
/codon_start=1
/transl_table=11
/pfam="DDE_Tnp_1_5"
/fullproduct="qcoverage 100 , hcoverage 100 , similarity
100 , identity 100 , evalue 1.19e-72 , alnlength 109 ,
Bacteria , Proteobacteria , WP_007548762.1 MULTISPECIES:
transposase [Wolbachia]"
/translation="MPQKMRVSNHSEYNKFLEKRGNIFHYINEAIEKWYENGPKIPGG
NNIYSDKVVILVHIITCLFRIGLRQTVGFIAGYLEQIGKNLQVISYSQSSRRFKKLNI
KINDCRK"
/product="transposase"

```

```

/besthit="qcoverage 100 , hcoverage 100 , similarity 100
, identity 100 , evalue 1.19e-72 , alnlength 109 ,
Bacteria , Proteobacteria , WP_007548762.1 MULTISPECIES:
transposase [Wolbachia]"
gene 13440..14477
/locus_tag="wEsol_01553"
CDS 13440..14477
/locus_tag="wEsol_01553"
/codon_start=1
/transl_table=11
/fullproduct="qcoverage 133.623188405797 , hcoverage 100
, similarity 74.6 , identity 74.6 , evalue 4.87e-211 ,
alnlength 461 , Bacteria , Proteobacteria ,
WP_174516147.1 hypothetical protein [Wolbachia
endosymbiont of Cardiocondyla obscurior]"
/translation="MRLYGKLDPSVSYSDRRGDWDSKRRILERQTSKKTYVKSSINE
NYTFFMHAMVFIINGECDMALGDQLNAKTEQELIDDGAFINALVEKLAAGVGNSGVYT
KTAANTAFVKTDGSNISTQADKGKALADAILAVQDNNKKSALVDKLGGLDAADAVYG
ASSNQAAKAFLADKYPFVKTTADLGAKVAEKAVVDVLPALATVGTDDTKKVYTKSVAD
TAFAKIDASNLTEAANKKAFAEAILPAQDGDKSILVDKLGDAIASTDKAEYNVGTEQT
AKQFLNSRGLIPSEDAIFTRLTSNDNFKTSVAMNVNASDTGTFQNAVREVMSQPRFEIP
GEADVPIISADW"
/product="hypothetical protein"
/besthit="qcoverage 133.623188405797 , hcoverage 100 ,
similarity 74.6 , identity 74.6 , evalue 4.87e-211 ,
alnlength 461 , Bacteria , Proteobacteria ,
WP_174516147.1 hypothetical protein [Wolbachia
endosymbiont of Cardiocondyla obscurior]"
gene complement(15128..16591)
/locus_tag="wEsol_01554"
CDS complement(15128..16591)
/locus_tag="wEsol_01554"
/codon_start=1
/transl_table=11
/pfam="Terminase_6"
/fullproduct="qcoverage 100 , hcoverage 100 , similarity
100 , identity 100 , evalue 0.0 , alnlength 487 ,
Bacteria , Proteobacteria , WP_155968932.1 MULTISPECIES:
phage terminase large subunit [Wolbachia]"
/translation="MNFLKFIELCFQTVPVPGCEYNDYQYIKVIADRLEAANVGKMRI
IFNMPPRSMKSLCASVAWPAWILGNQPTARIIVASYSRLLSEKHS�DTRCIMQSSWYR
ELFPEVELSKDQNTKYKFQTVQRGYRIATSVGGTTLTGEGGDFIIVDDPLSPAQALSET
FRKRATNWFDQTLVARLNNRKKGVIVLVMHRLHQEDLTGHLLSKPKNIWNHTCLPMIS
ENKEIIYSIKKPAPPFLVPVTRVTTNEYKSWITASSARMTPPVILYSREEGQLLYPLD
GGKEEVEMIKVELGSYAFAAQYQQNPLPLSSGIIKREWLKRYRNFDPNLSHVTQSWDT
AVSTSNMSNFSVCTTWTQVGNKFYLLDVYRAKLEYPKLKEQVLSLAARWTPHAILIEA
KTSGQQLVQELKTNSDLPIIEIVPHDDKLTRFYQIVPIIESGKVFLPHQAVWLNDFEY
ETLMFPETRHHDDQVDSTVQYLQWVRDSSSRVAALRAL"
/product="phage terminase
large subunit"
/besthit="qcoverage 100 , hcoverage 100 , similarity 100
, identity 100 , evalue 0.0 , alnlength 487 , Bacteria ,
Proteobacteria , WP_155968932.1 MULTISPECIES: phage
terminase large subunit [Wolbachia]"

```

#### ORIGIN

```

1 gaaaataaac agtctgaaat atagtatttt ctaaaatgaa tgataaatTT ccattatggt
61 attaccaacc aaaagttgta agtctgtata tttatgcatt aaaggtctga ggcggcTTTT
121 gatggtattc caacaatgct ctataggggt caaatctggt gaatatgttg gtagatagag
181 caaacggcat ctagcattat ctattaactc ctttgttttg ggagttttat ggaatgtggc
241 attgtccata actattgtag taccatgtgg caatttaggt aataacatct tctctaacca

```

|      |             |             |             |             |             |              |
|------|-------------|-------------|-------------|-------------|-------------|--------------|
| 301  | tgtattgaat  | acctctttgt  | cacacccacc  | tttgaaagtc  | attggtgcaa  | taaatctctt   |
| 361  | tccaatccac  | cgcctatta   | tactgattct  | ctctcgtttt  | cttcctggaa  | tatctgcata   |
| 421  | aattttcttt  | cctattggag  | cacgtccata  | ctctcggtat  | aacctattat  | caactcctgc   |
| 481  | ttcatctata  | tataagatgc  | tggaatggtc  | tatttttgag  | attttatcgg  | taaatcgctg   |
| 541  | cctatcttct  | tgattgcgct  | cttgatatag  | tgtaactttt  | ttttaagta   | attcttagct   |
| 601  | gtttcagcct  | ataccaaat   | gaatttattc  | caaatccaag  | attttgtttc  | atctctgcca   |
| 661  | gcgtatgac   | tggattcttt  | ttaacatatt  | cttcgagtat  | ttttgggtct  | atttttcgaa   |
| 721  | taaagctgcc  | gtttttcgat  | ggccttaggc  | tttcaccagc  | ggctttcttt  | cttaaccagc   |
| 781  | ggtacagagt  | tgctattcct  | atctccaaaa  | gctctgccac  | ctcaaccttt  | gacttccctt   |
| 841  | tttctatcat  | cgatactgcc  | ctttccctta  | aatccacact  | atacgccatt  | ataactcaaa   |
| 901  | tagcttatta  | tacctttatc  | atttactttg  | ggaagtacta  | tagtgttgct  | atttgattct   |
| 961  | aactttttata | taataccata  | aatattttta  | tatggagagt  | gcaatgccaa  | gaacgacaga   |
| 1021 | acgtcatgct  | acagtactta  | ataagttaca  | aagtgttatt  | gaacatatag  | attccaaaac   |
| 1081 | tgctgctgaa  | aggcgtttag  | ctattgaaag  | atgggtgaaa  | acttacatta  | gacaggtaga   |
| 1141 | atacctagaa  | gatgataagc  | tacaattctt  | gtacaaaatg  | tttcgtgatg  | agagttgttg   |
| 1201 | gtcagatata  | aaattaaata  | atgcaatctt  | aggacagaag  | ctcactgaag  | aaaagataga   |
| 1261 | agcaatagat  | aacccattct  | gtaggtataa  | catggcttgc  | aggtattgtg  | tagtagataa   |
| 1321 | aattcatccg  | ctctttcaag  | agcaatttga  | ttcttataaa  | ggtagagtth  | ctcctgatgc   |
| 1381 | agtagacatg  | gagggtaatc  | ctgtgaatga  | caagtacata  | agaaatgatt  | tgctagactc   |
| 1441 | catggaaagt  | tatgatcctg  | tggtcagctt  | ttggattgat  | agagagtctg  | aagaattaaa   |
| 1501 | attaaaagaa  | tacagtaata  | taggtggctt  | cagaaaagct  | gtagatttta  | aatggagtca   |
| 1561 | gggagtggaa  | tatttctata  | atctcttgag  | tgagcaacag  | agaaaagagg  | aagttactaa   |
| 1621 | tgcaattata  | accttatcct  | ctattcaatc  | taactttaat  | cgtgctactg  | ttttggattt   |
| 1681 | ttgtttgcat  | aaaatggatg  | actcaacaaa  | acgtgagctg  | ttagttaaat  | tatcagaaaa   |
| 1741 | agatcaggga  | gtatattcgc  | ttcttaatgg  | gttaaatcaag | tggagtthtc  | ttgatacagt   |
| 1801 | ccaagatatg  | ataaagcgct  | tgtgctatga  | agaagtthcg  | gtgcctacag  | ataaaatact   |
| 1861 | ttcaggctcg  | gattatggac  | tcctactthc  | ctctctthca  | aatgtgatat  | tggaaaatcc   |
| 1921 | tgagttaagt  | gctcaagcta  | ggtcaaccat  | tatgggtatt  | tggagggtgca | atcgctthtag  |
| 1981 | tgagcataaa  | aagctagtth  | ttttttccga  | tgataaagct  | ctagttacac  | ctgtattcgc   |
| 2041 | tgcaattcatt | acagattgga  | atagaaataa  | agctggagggt | gatgttggaa  | taaaagatca   |
| 2101 | gatattagaa  | atthttacggt | ttgcagaaga  | gaattgttca  | tcagaagatc  | ttgcaagtht   |
| 2161 | taaagattac  | gtagttaatg  | acttaaaaaat | ggttagtatg  | cctgggtatgg | taaggaatat   |
| 2221 | ttcctatagt  | aagctaattg  | gggagttgth  | ttatgaagta  | agtgtthtcta | gtgatctccg   |
| 2281 | taccgaacta  | gcatctcctg  | gtgttagtggt | tttgtctagt  | catagtaagt  | agaggtgtht   |
| 2341 | tatgcataac  | aatggtgaaa  | atatagggtt  | agttagaagt  | ttgctagatg  | gagaatatca   |
| 2401 | gaaatttgaa  | gaaaggthtcg | agtctthttt  | agatcaatgt  | ccatctthtc  | tgcaattcagt  |
| 2461 | tggtaaggat  | cgctthtttcc | ctgcattctt  | tttcgggtatg | tttgctactg  | catttgattc   |
| 2521 | tgatattgca  | aaggacagtg  | aaagaattht  | ctthtcgttht | gacaatgatc  | cagataaccc   |
| 2581 | tagaaaagga  | aatthtaaagg | ttgctattht  | aactgaagac  | agaaacggca  | ggcaaatagt   |
| 2641 | aagggtgctac | actattgctg  | acaggacaaa  | cagcattggt  | tcaagattca  | gtgaagaaga   |
| 2701 | gaaacagtgg  | gtagaacgta  | aactgcagggt | ggatggtact  | aaaagaagaa  | aactagaatt   |
| 2761 | agaatgggaa  | gagtataaaa  | tatttgatg   | ggcagaaaat  | ctaggagaag  | acgaaaaaga   |
| 2821 | ggaagcaata  | agatgtaagc  | gattthtctga | agatgaagca  | thtactcaag  | attcagcatc   |
| 2881 | tctgtgcat   | ggtthtgaag  | aggthgtcag  | aactatgcag  | caaggtaact  | tatcaaattt   |
| 2941 | gttaggaaga  | ttggcaagta  | ataacgcaga  | ttatgttht   | gctaccatta  | ggaacgttht   |
| 3001 | caattacata  | attgacatct  | acaatagata  | taatcatgta  | ctagattthca | atggcaaggga  |
| 3061 | gtcagactat  | catggcttht  | tgctcagggt  | tttgatgaac  | thtaggtatc  | gccacacggc   |
| 3121 | tggcatttht  | cttgagtht   | ttgtaggagg  | tgatataaca  | gatattactt  | tccttatac    |
| 3181 | tggagtggat  | aggctaagggt | attctgtthc  | tattataatc  | gagctcaag   | ctggaggaga   |
| 3241 | gagtgtctgat | caagcattgg  | aacaagctga  | aaattacgtc  | ataagatgtc  | ctgtctcatc   |
| 3301 | tatatcaatt  | catacttcat  | caggtagtgc  | tgtctgtgtt  | ggattaaatt  | ttgatttaga   |
| 3361 | tgaggatcag  | cgthtgcggc  | ttagcactca  | agactthtctg | gataaagggt  | ctthtthtatt  |
| 3421 | ggaaaggcta  | thtaatggtt  | ctgtagacga  | gattagagag  | aacgttagaa  | attattthtatt |
| 3481 | atatccatct  | thtgggtgtac | ctgccgtacc  | tgacgtaaga  | ggtactaata  | gcagagtgtt   |
| 3541 | thcctatac   | actggattth  | cattthgcaag | tactgcattt  | gcgaaaaaaa  | aggattatgg   |
| 3601 | tagcaggagg  | aaattgggtga | gatgtaacta  | aatacctgtt  | caattaccac  | gataacgata   |
| 3661 | aaatgctagg  | cccgaaggga  | agggttgccac | aagtaaatgt  | tcgggaccgt  | gccttaacta   |
| 3721 | tggthtttac  | ggcattatgg  | caaggagaag  | aaagaattat  | tgtgcttgat  | gttcgtcatg   |
| 3781 | cgthtagctca | ccaattthccc | atacaagggtc | tagactthgtc | acgtthggcca | gatgctagag   |
| 3841 | tatatgaagt  | agcatgcacg  | thgaatccaa  | ggagaagaga  | tgaggatgat  | ctthgthttag  |

|      |             |             |             |             |            |            |
|------|-------------|-------------|-------------|-------------|------------|------------|
| 3901 | cagttgatgt  | gacaccat    | caatcacctg  | ccgattatct  | acagagtaag | ggcaatcagt |
| 3961 | cttttcaagg  | tgagctttta  | acaataggtg  | gtgttagtaa  | tatacacagc | actgcaa    |
| 4021 | ttatgatgaa  | tacaggctgg  | caagatatca  | ataggcataa  | ggcattat   | caagcaat   |
| 4081 | ccaaagtgtt  | atttacgtta  | aagtgggtag  | tgaatagaaa  | taatgcccga | gaggttgggt |
| 4141 | ttcattctgt  | gttgcatgga  | ttgttttata  | cttgtgataa  | tccagctagg | ataattatag |
| 4201 | agttccagtt  | gggaggagga  | gagaagatag  | atgttggtgtt | attaaggtct | gcagaaagta |
| 4261 | gaggtgggtg  | tcattccaatt | gcgaaagagc  | tgaagtttgc  | tgatgattac | gaactacaga |
| 4321 | gtaaaataca  | agaggcaa    | aatcagttaa  | atagttat    | gcaatgtaga | ggatataagc |
| 4381 | gtattaccga  | tggagacaca  | gtagttttat  | cgtatgccat  | atggaatgat | cgtgcgcaga |
| 4441 | ggccagatac  | tcttatatca  | gttaaggatg  | ttcttcgtat  | aaaggacaac | ttaggacaca |
| 4501 | gttctgcaga  | tgatcttcct  | ggcagatgag  | ggttattgag  | aatttacata | taaaattaag |
| 4561 | tatataatag  | attatactgg  | taaaatgtat  | atgatagcag  | gctcaaagtc | atatgaagct |
| 4621 | acggtaggag  | aatacaactc  | tctaaaaaat  | atgaaaaatt  | atacttg    | tgactcttaa |
| 4681 | tttatgctaa  | ttattgcaca  | tgatgtat    | atagattgag  | ggagtgtgg  | gttaggg    |
| 4741 | atctcaaagg  | atgggcaggt  | ctgtgcaagt  | gatgggttag  | ctactgaagg | acagcatacg |
| 4801 | gagcgttttg  | gtcagcacac  | tcttgaagga  | agcacatcat  | cgttaagtaa | agaacaaact |
| 4861 | gatgactgga  | atgagtccat  | tgttgaagat  | aaaaatactg  | ttgttgaag  | ttat       |
| 4921 | ccagaaaact  | caattttaat  | gaatttagca  | aacctgttaa  | ctgagagcga | aaaagtttca |
| 4981 | attaaggtta  | gagatttgta  | tgttacaatt  | ccagatgacc  | acaaggctgt | tcctccgaga |
| 5041 | ggaattgtta  | gtattattga  | ggtattaaag  | aatctctcta  | acaatagcgg | gttaagcatt |
| 5101 | aattttcctc  | atactgatgt  | tcggagtatt  | attctaattt  | ctaaaaagtc | taacctagag |
| 5161 | ttcaggcttt  | ctttctctag  | tcatgatatc  | tatgaacttt  | atctgcgc   | gattgataaa |
| 5221 | gaaagcctag  | aaatattatc  | taaagaaata  | agtctaatta  | cagctagtcc | ttttgatgg  |
| 5281 | ctacctacta  | ttaaaatgcc  | agcttttagca | caaaaaagcg  | gtaaagataa | tcccagtagc |
| 5341 | tcaatggatg  | ataatctaac  | tcccctcagt  | gaggttgata  | ctaggcttca | aagtgatgaa |
| 5401 | caaggtttac  | agccagaaat  | tttatctact  | agtctaacag  | gaactagcac | gaataaggga |
| 5461 | cgagagcaag  | attatcttaa  | tgatagtga   | atagttgtgg  | ctagtaatat | ggctctcaat |
| 5521 | acttcgggta  | ttgatgg     | attagacatc  | aaccatttg   | ctaacttgga | tgaggatcgg |
| 5581 | attaatacaa  | gtactccgac  | taaacagatc  | agcttatgtg  | agccgtcttc | cataagtga  |
| 5641 | tatctagtta  | atgagagcga  | acttagtgac  | aggatgaatt  | taaaggg    | aagtagaatg |
| 5701 | gctgaactta  | ttagactgat  | agctggcgta  | ttcattgata  | tgagaggaat | aatagaagaa |
| 5761 | ctaagtattc  | ccttggttag  | tcaaaagata  | aaagatat    | gagaatattt | aaaagatttt |
| 5821 | ctttctgtag  | tagaggaact  | gatcaacgaa  | cgtagcaaaa  | atcgcctaca | agataag    |
| 5881 | gaagaaaatc  | acgaagcttg  | cttacaacaa  | at          | taaaatcaaa | attgaaaata |
| 5941 | gaagaaagaa  | ttaattcttc  | tatagatcag  | aaaaatcaac  | aattaaccga | aaaaaaactc |
| 6001 | cagcttgcaa  | aagataatca  | ggattttctt  | ggtaa       | aagagctggg | taatcttctg |
| 6061 | tgtgacaaac  | acaaagagct  | agaggagcaa  | tgtagtactc  | agcaaag    | aaaggaacgt |
| 6121 | ctaggtacgt  | tgcttg      | gaataagcat  | ttgaagg     | aaatagacgg | tatgaacaag |
| 6181 | ttttacaaac  | accttccaga  | acgaactgag  | gaaaaaag    | gtgctacaaa | aataggaaaa |
| 6241 | ataagcaaat  | cgagagaagt  | tactcaatcg  | aataacgggt  | atcataagga | ag         |
| 6301 | gaacaagagt  | tgagacaaaa  | gatagatgaa  | atgcagagaa  | aaataggtga | attgctgtca |
| 6361 | gaaaatagta  | tgttactaga  | ggaattaagg  | tcaaaatgtg  | aacaagtagg | ggatgctgta |
| 6421 | gaaagcttaa  | gtaccgagat  | ctcaagtttt  | cgctctgaac  | aaaatttgta | taatgagctt |
| 6481 | gaggctgtta  | aacgaagaga  | agagctcgat  | aactcagacc  | aagctgaaat | gtacttaaa  |
| 6541 | aatgggtgatc | tagttaatgt  | gacacaaggt  | tatagtaaaa  | aggctgataa | cccaactaaa |
| 6601 | cttactgaac  | agtttaaagc  | agtaaag     | caactcttga  | tggcaagcac | ttatagtaga |
| 6661 | aagcagatga  | cctatgcttc  | tg          | gtgttgctg   | gggcgttttc | tg         |
| 6721 | agtttaacga  | tg          | agcaatatgt  | at          | ccgtggctgc | gt         |
| 6781 | cttg        | ggtgttactg  | ttcttataag  | gcaagtacag  | cgcttagtaa | tattgaag   |
| 6841 | gatcaaatcg  | gaaattgtgt  | taatctacgg  | cttcaggaac  | tcaggtagcc | taagttggga |
| 6901 | agggttaagt  | tttgagttaa  | tggagaggtt  | cttctaaatc  | attgggtgtt | gtgtttttta |
| 6961 | ggaatgctct  | c           | attggaagga  | ttgttctata  | gtat       | aaatgaatga |
| 7021 | taaattttcca | ttatgg      | accaaccaa   | agttgt      | ctgtatattt | atgcattaaa |
| 7081 | ggtctgaggc  | ggcttttgat  | ggtattccaa  | caatgctcta  | tagggttcaa | atctggtgaa |
| 7141 | tatgtttgga  | gatagagcaa  | acggcatcta  | gcattatcta  | ttaactcctt | tg         |
| 7201 | gttttatgga  | atgtggcatt  | gtccataact  | attgtagtac  | catgtggcaa | tttagg     |
| 7261 | aacatcttct  | ctaaccatgt  | attgaatacc  | tctttgtcac  | accacctttt | gaaagtcatt |
| 7321 | ggtgcaataa  | atctctttcc  | aatccacc    | cctattatac  | tgattctctc | tcgttttctt |
| 7381 | cctggaatat  | ctgcataaat  | tttctttcct  | attggagcac  | gtccatactc | tcggtataac |
| 7441 | ctattatcaa  | ctcctgcttc  | atctatata   | aagatgctgg  | aatgg      | ttttgagatt |

|       |             |             |             |             |             |             |
|-------|-------------|-------------|-------------|-------------|-------------|-------------|
| 7501  | ttatcggtaa  | atcgctgcct  | atcttcttga  | ttgcgctctt  | gatatagtgt  | aacttttttt  |
| 7561  | taaagtaatt  | cttagctgtt  | tcagcctata  | ccaaattgaa  | tttattccaa  | atccaagatt  |
| 7621  | ttgtttcatc  | tctgccagcg  | tatgatctgg  | attcttttta  | acatattctt  | cgagtatttt  |
| 7681  | tgggtctatt  | tttcgaataa  | agctgccgtt  | tttcgatggc  | cttaggcttt  | caccagcggc  |
| 7741  | tttctttctt  | aaccagcggg  | acagagttgc  | tattcctatc  | tccaaaagct  | ctgccacctc  |
| 7801  | aacctttgac  | ttcccttttt  | ctatcatcga  | tactgccctt  | tcccttaaat  | ccacactata  |
| 7861  | cgccattata  | actcaaatag  | cttattatac  | ctttatcatt  | tactttggga  | agtactatac  |
| 7921  | ttagtaatcg  | tatatttaag  | aagagagatg  | gcacatcaac  | aggtgatcat  | ggttgcaagt  |
| 7981  | atgaagtaaa  | attattaatg  | ctgtatctac  | tttatgggtt  | aagtagtaaa  | attgactttt  |
| 8041  | ggttagcatc  | aaacatagaa  | ggttttggag  | cctttgatga  | tatttttttt  | gagtataaag  |
| 8101  | atcagaagaa  | caaatcgaga  | attatcttgg  | ttcaagctaa  | acaccgtaac  | gaccctagtt  |
| 8161  | catcagcgaa  | tattactttt  | gaagatttgt  | ttattgatgg  | aaacaataga  | aagcgacaga  |
| 8221  | aagaggattt  | cgggttaaac  | aaatattttg  | aatctcatcc  | tgagattaag  | caaaaccctg  |
| 8281  | agtataagaa  | cagtgatatt  | acacttgtca  | ttcatgctaa  | tgttaatgtg  | aacttaaaaa  |
| 8341  | aaggtacaga  | aaagcaaggc  | aaagtagaaa  | cattagagga  | gtatctggaa  | gagtcaaagt  |
| 8401  | taacagatga  | taacatttta  | agtattttatg | aaggtcacag  | aggaacgtgc  | tacaaaataa  |
| 8461  | aaaatcatat  | tgaactgaaa  | aaatacttca  | gttgccggcag | tgaagatgaa  | atagaagatt  |
| 8521  | ttttacttag  | aataaggttt  | gtagttaatc  | aacctaatca  | ttcaaaatta  | gatgatatta  |
| 8581  | ttaagaaaga  | aatagggagt  | atatacaaaa  | tatcaggcaa  | gaaaaacatt  | gacatggttt  |
| 8641  | ttgactttgc  | acgcgggaag  | gtagaaaaat  | ggtgggaaca  | acagggtagc  | gaagtttctt  |
| 8701  | atctaacaag  | aaaagacaat  | tatttttaagg | aagccataga  | acatctttat  | agtctcaaac  |
| 8761  | ttaaggaaga  | tctacctgaa  | ttttggcaag  | tcctctctcg  | aaattataac  | tttgtcggca  |
| 8821  | gagaagcgct  | gctagataaa  | atagaagaat  | gcctgaaagc  | taatgatata  | gcaacactag  |
| 8881  | ttgcttgtca  | tgggaatagg  | ggaataggta  | aaacacaatt  | agcattagaa  | tttatttgga  |
| 8941  | gtaagctcca  | aaaatataga  | tggataattt  | ggcttgatac  | acgagataga  | aatactttaa  |
| 9001  | ttaacgagta  | catcaagtta  | ggacgtggac  | taaacgttat  | tcatgggttac | agagaaaacg  |
| 9061  | ttcgtgaaga  | agatcacgcc  | aagcatgtta  | agtattggct  | agaacaccct  | gaacgtgctg  |
| 9121  | ggtggctact  | gatatgcgat  | aacgctccta  | actacaaaga  | tatagcagat  | ttacttccta  |
| 9181  | tagaaggagg  | aaagataatta | ttaattttctc | gttatacatt  | tggtctggcca | caaccacaga  |
| 9241  | acactatttc  | tgttgatggt  | tttgaacctg  | gagaatcaag  | gagctacatt  | tgtaaagatac |
| 9301  | tatagtactt  | cccaaagtaa  | atgataaaagg | tataataagc  | tatttgagtt  | ataatggcgt  |
| 9361  | atagtgtgga  | tttaagggaa  | agggcagtat  | cgatgataga  | aaaaggggaag | tcaaagggttg |
| 9421  | aggtggcaga  | gctttttggag | ataggaatag  | caactctgta  | gcgctgggta  | agaaagaaag  |
| 9481  | ccgctggtga  | aagcctaagg  | ccatcgaaaa  | acggcagctt  | tattcgaaaa  | atagacccaa  |
| 9541  | aaatactcga  | agaatatggt  | aaaaagaatc  | cagatcatatc | gctggcagag  | atgaaacaaa  |
| 9601  | atcttggatt  | tgggaataaat | tcaattttggt | ataggctgaa  | acagctaaga  | attactttaa  |
| 9661  | aaaaaaagtta | cactatatca  | agagcgcaat  | caagaagata  | ggcagcgatt  | taccgataaa  |
| 9721  | atctcaaaaa  | tagaccattc  | cagcatctta  | tatatagatg  | aagcaggagt  | tgataatagg  |
| 9781  | ttataccgag  | agtatggacg  | tgctccaata  | ggaaagaaaa  | tttatgcaga  | tattccagga  |
| 9841  | agaaaacgag  | agagaatcag  | tataataggc  | gggtggattg  | gaaagagatt  | tattgcacca  |
| 9901  | atgactttca  | aaggtgggtg  | tgacaaagag  | gtattcaata  | catgggttaga | gaagatgtta  |
| 9961  | ttacctaaat  | tgccacatgg  | tactacaata  | gttatggaca  | atgccacatt  | ccataaaaact |
| 10021 | cccaaaacaa  | aggagttaat  | agataatgct  | agatgccgtt  | tgctctatct  | accaacatat  |
| 10081 | tcaccagatt  | tgaaccctat  | agagcattgt  | tggaaatacca | tcaaaagccg  | cctcagacct  |
| 10141 | ttaatgcata  | aatatacaga  | cttacaactt  | ttgggttggt  | ataccataat  | ggaaatttat  |
| 10201 | cattcatttt  | agaaaatact  | ataagagggt  | gtccggaaac  | tagtaaatcc  | aagcatattc  |
| 10261 | cctcttttaac | ataaccctac  | tcatagctag  | gtatatgaaa  | ttctcagtg   | atggtgtgag  |
| 10321 | taaatcatatc | tccttcgata  | gccttctatt  | cctattaacc  | caagcaaaaag | tcctttctac  |
| 10381 | aacctcatctt | cttggtctga  | ctttaaaccc  | ttgttctctt  | gttggttagta | gctcagggtg  |
| 10441 | cgtatctttg  | tgcacccaaa  | atctacatgg  | aggcctttta  | acaatttcaa  | tatctatgtc  |
| 10501 | atattctttcc | tttatgtgat  | tcttttaaat  | tcttccttgg  | tatcccatgt  | cagcccacat  |
| 10561 | ttttttaact  | ttagtataatt | ttgttctcat  | attgtttaat  | gctattttta  | taccatctct  |
| 10621 | atcatttttcg | ttagcagcgc  | ctacgtaaca  | acctagtata  | aaaccctgag  | tgtctgtaat  |
| 10681 | tatatgcctt  | tttctaccct  | ttactttttt  | acttccatca  | tagcctttga  | tccccctttt  |
| 10741 | tctgtagtct  | ttacagattg  | actatctact  | atacaggcac  | tcggctgctc  | attccttctc  |
| 10801 | atttttcttc  | tactataatt  | tgtaatttca  | taattcattt  | tctcaaaaat  | tccctgcttc  |
| 10861 | ttccattggcc | tgaactgctc  | atacacagtc  | ttccatagcg  | gaaaatcatt  | tggtaaatac  |
| 10921 | cgccattgac  | accctgtacg  | caatacatag  | aaaattgctt  | ctaataatttc | tcttttgcta  |
| 10981 | tactttggcg  | gccttcctcc  | tttcttgtat  | gatactctga  | agtgtttttc  | tattcttgcc  |
| 11041 | cattcccttt  | cgcttagatc  | tgttggatac  | ttttttctca  | tctttacccc  | gtactaaaat  |

|       |            |             |             |             |             |             |
|-------|------------|-------------|-------------|-------------|-------------|-------------|
| 11101 | ttcagatatt | atagcctttt  | acttatttcc  | ggacaacctc  | taagttatgc  | ttgcgctgct  |
| 11161 | atcatttggg | ctgccgcgtc  | aatcataacg  | ccacttggtg  | gggcttggtg  | caaagtgcga  |
| 11221 | agtaagttga | gtgaagtaca  | gaagccagaa  | aaacatcaat  | ttttatctaa  | ggataattca  |
| 11281 | aagactactt | cagtcaatgg  | tataccacaa  | actgagttat  | aagttctgct  | tttcagcagc  |
| 11341 | atgaactata | ttgaaatgga  | ataaaaaagt  | aaagagtgtg  | agcttaagtt  | actttagcta  |
| 11401 | tactatataa | attatttttat | aatatatatta | atgagttgtg  | aaccttctct  | tactaaaaaa  |
| 11461 | agctacaaat | ctcatatttc  | caagcgtatg  | cgtaagttgc  | gaatgtatca  | ttgatgaaaa  |
| 11521 | tcttaatctg | tgtagtgaat  | gcaacaaaaa  | aatcaatttt  | ctaactaagc  | attactgcaa  |
| 11581 | tgtttgtggc | gtagtaatct  | cagacaatat  | ttatacgtgt  | ggtaagtgcg  | tcataaatcc  |
| 11641 | tccaccgttt | aaagtattaa  | gatcagtttt  | tgcttatgat  | caacatagta  | gaaacatgat  |
| 11701 | tataaatttc | aaattttttg  | ataatttgaa  | ttacgtaaaa  | atctatgcaa  | agtggtatca  |
| 11761 | ccaagcta   | caggatacat  | ttcagaacgc  | agagatcata  | attcctatac  | cgttacataa  |
| 11821 | aatgcgcttg | tttaaacgta  | aatataatca  | agcagcactg  | cttgcaaaag  | aattgagtaa  |
| 11881 | gttgtccaat | ttatcctata  | cgccatttgc  | aataaaaacgc | cttcgccata  | ctgcgcctca  |
| 11941 | agctggctct | tcacttaaac  | agcgtgaaaa  | aaattttaag  | aaggctttta  | aaacaagcaa  |
| 12001 | caagaaaatt | atcgaaaata  | aaatcgtgat  | attagttgat  | gatgtggtaa  | caaccggagc  |
| 12061 | aactgtaaga | tcttgctctc  | aggaaatttt  | aaactccggt  | gcaaaagaag  | tgagagtgtc  |
| 12121 | atcacttgca | agaacgggtg  | atgattggac  | ctcttgcata  | aaaaattagc  | agtcagtatc  |
| 12181 | atccaagtag | cttgactact  | tggatctatt  | tttttctaga  | ttccagcgcc  | agcgtcacgc  |
| 12241 | acatagctgt | acgaacattg  | tttgccaagg  | aggggtgtcat | cccagtgtct  | gacactggga  |
| 12301 | tggctttgtt | gcacgcgtct  | tcggatagta  | ggtaacacac  | aataaattta  | tgaagctatc  |
| 12361 | tcaaatttag | ccatgcctat  | ttcagtaaat  | ttgttaagca  | aataacattt  | gagtagcagt  |
| 12421 | tccctctcac | gattcatttc  | agatttggtc  | ctaaaactaa  | atccaaatgt  | ctttttta    |
| 12481 | cgcgagaaaa | aaccttctat  | ataagatctt  | ttcccataac  | tcactctctt  | tttccacttc  |
| 12541 | tttataccat | cttcatcata  | tgactttatg  | agcttgactg  | cagaatttct  | ctcagccata  |
| 12601 | tagtctaact | ttggatgctc  | tgctgcgttg  | tttttcggag  | gaattttcgt  | ttttatacca  |
| 12661 | tattgattac | acagcttata  | gagcttttct  | ctgtcatatg  | ccctatctgc  | atatagtact  |
| 12721 | tttatgacat | actgaaaatc  | gacttctttt  | agcaaatcac  | aagctccata  | gtgatcagcc  |
| 12781 | gttactgtat | tttacagcta  | tggctttttt  | gctgtttgta  | ttcaacatta  | catgcaattt  |
| 12841 | tcttgtctgt | tcatagctgc  | gatactttct  | atcttcgcta  | ttttctttgc  | tatgaccagg  |
| 12901 | agtgttggtg | tatatactaa  | ttcctgtacc  | gtctatagca  | atttcgatat  | cttccatatt  |
| 12961 | attttctgca | atcattgatc  | ttaatattga  | gtttcttaaa  | ccttcttgat  | gattgtgaat  |
| 13021 | agctgataac | ttgcaaattt  | ttcccaattt  | gctcaaggta  | tcctgctata  | aaccaactg   |
| 13081 | tttgcctcag | gcctatttcta | aataaacaag  | ttattatgtg  | cacaaaaatt  | acaactttat  |
| 13141 | cgctataaat | attgttgcca  | cctgggtattt | ttggaccatt  | ctcgtaccac  | ttttctatgg  |
| 13201 | cttcgttgat | ataatgaaaa  | atatttcctc  | ttttttctag  | aaatttggtta | tattcgctat  |
| 13261 | ggttactgac | cctcattttt  | tgtggcatat  | tttttcttca  | acagttaaat  | cgctattttat |
| 13321 | aatgaatttt | gtcagtaatc  | actaattttt  | ctgctgctat  | gcaacaaaagc | ccactgggat  |
| 13381 | ccaggaaagt | ttgcttgtga  | gcaagcaaac  | tagtatagaa  | agtgggttaca | acattttcga  |
| 13441 | tgagattata | tggaaaactg  | gatcccagtg  | tcagctactc  | ggatgacagg  | agaggggact  |
| 13501 | gggatagcaa | gagaagaatt  | ctggaacgac  | aaacctcaaa  | aaaaacttat  | gtaaaatcta  |
| 13561 | gcattaacga | aaattatact  | tttttcatgc  | atgctatggt  | ttttataatt  | aacggagagt  |
| 13621 | gtgatatggc | gttaggtgat  | caattgaatg  | ctaagacaga  | acaagagctc  | atagacgacg  |
| 13681 | gtgcttttat | aaatgcttta  | gtagaaaagc  | tcgcagcagg  | tggttggtaat | agtggtgttt  |
| 13741 | atactaaaac | tgctgcaa    | actgcatttg  | ttaaaactga  | tggttccaat  | atttcaactc  |
| 13801 | aagcagataa | aggaaaagct  | ttagcagatg  | caatacttgc  | tgtacaagat  | aacaataaaa  |
| 13861 | aatcagctct | agtggataaa  | ttaggaggat  | ttcttgatgc  | tgccgatgca  | gtgtatgggtg |
| 13921 | ctagtagcaa | tcaagcagca  | aaagctttct  | tagctgataa  | atatcctttt  | gttaaaaactg |
| 13981 | cagatcttgg | agcaaaaagt  | gcagaaaaag  | ctgtcgtgga  | tggttctagtt | cctgctcttg  |
| 14041 | caacagttgg | tactgatgat  | actaagaagg  | tttatactaa  | atcagtagca  | gatactgcgt  |
| 14101 | ttgctaaaa  | cgatgcttcc  | aaccttacag  | aggcagcaaa  | caagaaagct  | ttcgcggaag  |
| 14161 | ctatacttcc | tgcacaagac  | ggcgacaaat  | caatttttagt | ggataaaattg | ggggacgccca |
| 14221 | tagctagcac | agataaaagca | gagtataatg  | ttggaactga  | acaaacagca  | aaacagttct  |
| 14281 | taaacagtag | agggtctaatt | ccatcagagg  | atgcaatatt  | tactagactc  | acaagcaatg  |
| 14341 | acaatttcaa | aacaagcgtt  | gcaatgaatg  | tcaatgctag  | tgatacagga  | tttcaaaatg  |
| 14401 | ctgtaaggga | agtaatgtca  | caaccgcgat  | ttgagattcc  | aggcgaagca  | gatgttccaa  |
| 14461 | tttctgcgga | ttggtaattc  | agcgtctagat | ccaagtagtc  | acgctacttg  | gatgacgtca  |
| 14521 | tacggctctc | ggatgacgaa  | aaaaaggact  | cggataaacac | cctacaatgt  | cattccagcg  |
| 14581 | cgtgacgctg | gaatccaggt  | cttttttagct | atcataggat  | gacagaagca  | gaccctccac  |
| 14641 | tttgtcattc | cagtaccctc  | ttcttgtcat  | gaaagtagct  | gacactggtc  | tccatccaag  |

```

14701 aggggtgtcat ccgagtagct gacactgggt tactttatga tgatgtcatg caagtagctt
14761 tccatccaaa aggggtgtcat cccagtgcct tgactacttg gatccagaaa aaagaatggg
14821 gtcataaaag tagcctcctt ctctgtcat cccagtgcct atttctttgt catcccagtg
14881 ccttgactac ttggatccag gaaagtttgc ttgtgagcaa gcaaactagc atagaaagtg
14941 gttacaacat tttcgatgag attatatgga aaactggatc ccagtgtcaa gcactgggat
15001 gatatcatcc ttctacgtca taccgcgatt cattcgcggt atctctagat cccgctaaca
15061 cgtagcggga tgacggttgt caggggtgtca tgcaagtagc tgactacttg gatctggtag
15121 actcaaata caatgcccg aaagctgcga ccctagagct actatctctc acccactgca
15181 aatattgcac ggtactatcc acttgatcat cgtgtcgagt ttcaggaaac attaaagtct
15241 cataactcaa atcgttcagc catactgctt ggtgcggcag aaaaaccttg ccagactcta
15301 taatcggaac aatttgataa aatcgagtga gtttgtcatc atgtggtact atttcgataa
15361 ttggtaaata actgtttgtc tttagctctt gcaccaattg ctgaccactt gtttttgctt
15421 cgattaaaat tgcgtgcggt gtccatcttg cagctagtga cagaacttgc tctttaagct
15481 ttggatactc aagctttgcg cgatatacat cgagtaaata gaatttattg cccacttttg
15541 tccaggtggg gcagacgcta aagttgctca tgttgcttgt tgaaactgca gtgtcccagc
15601 tttgagttac atgcgagaga ttgtcaggaa aatttctata gcgcttcagc cactctcggt
15661 taattatacc acttgaaagt ggcagagggt tttgttgata ttgtgcagca aaagcgtaac
15721 ttccaagttc aacctttatc atctcaactt cttcttttcc tccatcgagg ggatatagca
15781 actgaccttc ttctcttgag tataatatta cgggtgggtg cattctagca cttgatgctg
15841 taatccagct tttgtactca tttgtagtta ctcggtgac aggaacaaga aaaggaggcg
15901 ctggcttttt gattgaatag ataatctcct tattttcaga tatcatcggt aaacaagtat
15961 ggttccatat gtttttcggt ttggagagaa ggtgcccggg taaatcttct tgatgtagcc
16021 tatgcatcac aagaacaatt actccttttt ttctattggt gagcctgggt actaaagtct
16081 ggtcaaacca atttgtagca cgcttttctaa acgttttact caaagcttgg gcgggactca
16141 gtggatcatc cacgatgatg aaatcaccac cttcacctgt taacgtccct ccaactgacg
16201 ttgcgattct gtatcctctc tgcactgttt gaaatttgta tttggtattc tgatctttgg
16261 atagttctac ctctggaaac agctctctat accaactaga ctgcattatg catcttgat
16321 cgagcgagtg cttttcgcta agcagccgag agtagcttgc aactattatt cttgcagttg
16381 gctgatttcc cagtatccat gcgggccacg caacactagc gcacagggac ttcattgaac
16441 gcggaggcat attgaatatt attcgctca ttttgccaac atttgccgct tcaagtctgt
16501 ctgctatgac ttttatatac tgataatcat tatactcaca ccccgccacc accgtttgaa
16561 agcacagttc aatgaatttt agaaagttca tgatataatg ttgaaaccaa cgctgacgc
16621 tgggatgaca aaaaaaggag cactgaaggc tataggtgag acgttgcggt atctctagat
16681 cccgctaaca agcagcggga tacttaacca tcatctacac cgtcataccg cgattcattc
16741 gcggtatctc agccgctaac aagtagcgga atgacaacaa tcctacgtca taccaccgcg
16801 gcgctaacaa gagatcccg taacaagcag cgggatgacg gttgtcgttt agctataaat
16861 attaagaaat ttaccaaata aaaaaaggc aaaagaagcc ccgtggttgg ctaattactt
16921 acattatact ttcaagtatg gcgttttttt attctaaacg cttaataacc gcgatttagc
16981 tgctttttta tgcaactaac ctttagtcat aaatgtttta gaa

```

```

//
LOCUS      JAQZAU010000132                7520 bp    dna        linear    ENV 17-MAR-2023
DEFINITION MAG: Wolbachia pipientis isolate wEsol contig_59417, whole genome
            shotgun sequence.
ACCESSION  JAQZAU010000132 JAQZAU010000000
VERSION    JAQZAU010000132.1
DBLINK     BioProject: PRJNA929258
            BioSample: SAMN33142973
KEYWORDS   WGS; ENV; Metagenome Assembled Genome; MAG.
SOURCE     Wolbachia pipientis (insect metagenome)
ORGANISM   Wolbachia pipientis
            Bacteria; Pseudomonadota; Alphaproteobacteria; Rickettsiales;
            Anaplasmataceae; Wolbachieae; Wolbachia.
REFERENCE  1 (bases 1 to 7520)
AUTHORS    Fiutek,N., Couger,B.M., Roy,S., de la Torre,J.R. and Connor,E.F.
TITLE      Genomic assessment of the contribution of the Wolbachia
            endosymbiont of Eurosta solidaginis to gall-induction
JOURNAL    International Journal Molecular Sciences
REFERENCE  2 (bases 1 to 7520)
AUTHORS    Fiutek,N., Couger,B.M., Roy,S., de la Torre,J.R. and Connor,E.F.
TITLE      Direct Submission

```

JOURNAL Submitted (10-FEB-2023) Biology, San Francisco State University,  
1600 Holloway Ave, San Francisco, CA 94132, USA

COMMENT ##Genome-Assembly-Data-START##  
Assembly Date :: JUN-2019  
Assembly Method :: FLYE v. 06-2019  
Genome Representation :: Full  
Expected Final Version :: Yes  
Genome Coverage :: 100.0x  
Sequencing Technology :: Illumina HiSeq; PacBio Sequel  
##Genome-Assembly-Data-END##

FEATURES Location/Qualifiers

|        |                                                                                                                                                                                                                                                                                                                                                                                                                                                                                                                                                                                                                                                                                                                                                                                             |
|--------|---------------------------------------------------------------------------------------------------------------------------------------------------------------------------------------------------------------------------------------------------------------------------------------------------------------------------------------------------------------------------------------------------------------------------------------------------------------------------------------------------------------------------------------------------------------------------------------------------------------------------------------------------------------------------------------------------------------------------------------------------------------------------------------------|
| source | 1..7520<br>/organism="Wolbachia pipientis"<br>/mol_type="genomic DNA"<br>/submitter_seqid="contig_59417"<br>/isolate="wEsol"<br>/isolation_source="galls on Solidago altissima"<br>/host="Eurosta solidaginis MN-2018-EFC"<br>/db_xref="taxon:955"<br>/environmental_sample<br>/country="USA: Cowling Arboretum, Carleton College,<br>Northfield, MN"<br>/lat_lon="44.48 N 93.13 W"<br>/altitude="280 m"<br>/collection_date="2018-11"<br>/metagenome_source="insect metagenome"<br>/note="metagenomic"                                                                                                                                                                                                                                                                                     |
| gene   | 22..453<br>/locus_tag="wEsol_01555"                                                                                                                                                                                                                                                                                                                                                                                                                                                                                                                                                                                                                                                                                                                                                         |
| CDS    | 22..453<br>/locus_tag="wEsol_01555"<br>/codon_start=1<br>/transl_table=11<br>/fullproduct="qcoverage 100 , hcoverage 100 , similarity<br>100 , identity 100 , evalue 2.30e-93 , alnlength 143 ,<br>Bacteria , Proteobacteria , WP_174516792.1 hypothetical<br>protein [Wolbachia endosymbiont of Cardiocondyla<br>obscurior]"<br>/translation="MSNYSVKESEKDYESIGRIVEDEYRIIDDIEVKIKPKSFESNKE<br>KNASVGYVHKVLDKLTITLNDTFVSDLDYQLRLNANYVQNKLSKDLYDLDKVVIDTSK<br>NYEILEKNFNNLREEVEKLGKIGTVSDDNIDEWEAPTHHDIL"<br>/product="hypothetical protein"<br>/besthit="qcoverage 100 , hcoverage 100 , similarity 100<br>, identity 100 , evalue 2.30e-93 , alnlength 143 ,<br>Bacteria , Proteobacteria , WP_174516792.1 hypothetical<br>protein [Wolbachia endosymbiont of Cardiocondyla<br>obscurior]" |
| gene   | complement(531..923)<br>/locus_tag="wEsol_01556"                                                                                                                                                                                                                                                                                                                                                                                                                                                                                                                                                                                                                                                                                                                                            |
| CDS    | complement(531..923)<br>/locus_tag="wEsol_01556"<br>/codon_start=1<br>/transl_table=11<br>/fullproduct="qcoverage 100 , hcoverage 100 , similarity<br>100 , identity 100 , evalue 6.11e-85 , alnlength 130 ,<br>Bacteria , Proteobacteria , WP_141456659.1 MULTISPECIES:<br>cytochrome c maturation protein CcmE [unclassified<br>Wolbachia]"<br>/cog="CcmE COG2332 153 Cytochrome c-type biogenesis<br>protein CcmE"                                                                                                                                                                                                                                                                                                                                                                       |

```

/pfam="CcmE"
/product="cytochrome c
maturation protein CcmE"
/translation="MKKKHKRLLITSGIFCFLSCIVFFILTTLKENISFFYTVSEAIV
LPNSQKPIHIGGMVVEDSVIRSESEVVVFQMTDFNKS VVVKYQGILPPMFSEKSGVVVQ
GKMFDNNTFLADTVFAKH DENYMPKVLK"
/besthit="qcoverage 100 , hcoverage 100 , similarity 100
, identity 100 , evalue 6.11e-85 , alnlength 130 ,
Bacteria , Proteobacteria , WP_141456659.1 MULTISPECIES:
cytochrome c maturation protein CcmE [unclassified
Wolbachia]"
gene complement(907..1044)
/locus_tag="wEsol_01557"
CDS complement(907..1044)
/locus_tag="wEsol_01557"
/codon_start=1
/transl_table=11
/fullproduct="qcoverage 100 , hcoverage 100 , similarity
100 , identity 100 , evalue 4.92e-21 , alnlength 45 ,
Bacteria , Proteobacteria , WP_167482792.1 MULTISPECIES:
hypothetical protein [unclassified Wolbachia]"
/translation="MNTYVIFAYLISFTLITGELIFTISCYIKSKKILES LKDNNEEE
T"
/product="hypothetical protein"
/besthit="qcoverage 100 , hcoverage 100 , similarity 100
, identity 100 , evalue 4.92e-21 , alnlength 45 ,
Bacteria , Proteobacteria , WP_167482792.1 MULTISPECIES:
hypothetical protein [unclassified Wolbachia]"
gene complement(1041..1913)
/locus_tag="wEsol_01558"
CDS complement(1041..1913)
/locus_tag="wEsol_01558"
/codon_start=1
/transl_table=11
/pfam="BPL_LplA_LipB BPL_LplA_LipB BPL_C"
/fullproduct="qcoverage 100 , hcoverage 100 , similarity
100 , identity 100 , evalue 3.08e-184 , alnlength 290 ,
Bacteria , Proteobacteria , WP_141456660.1 MULTISPECIES:
biotin--[acetyl-CoA-carboxylase] ligase [unclassified
Wolbachia]"
/translation="MIPEGFHIHHYKEVSSTNKEALDLIGRGISNETVIIADKQTEGR
GRTGKNWISPEGNFYASLVINLFNDYLNESQLSVSFQRTLESRKKEEWIPVSSTGMT
SEGIGMTERGLVNKIADVSKLTELTFVTALAVGNTILSFINGNLNLYKWPNDILIDGK
KISGILLEKRSNSNWLIIIGIGINVNHAPLP GTTCISNYGESVSNIDLLKKLIINFNKL
RKQWLFDGIFYAIREMWLKKAFKMHEQISVKLADKLYEGIFADIDKSGKLVLQKDGSL
IYFDAGELFIGSAL"
/product="biotin--"
/besthit="qcoverage 100 , hcoverage 100 , similarity 100
, identity 100 , evalue 3.08e-184 , alnlength 290 ,
Bacteria , Proteobacteria , WP_141456660.1 MULTISPECIES:
biotin--[acetyl-CoA-carboxylase] ligase [unclassified
Wolbachia]"
gene complement(1931..3295)
/locus_tag="wEsol_01559"
CDS complement(1931..3295)
/locus_tag="wEsol_01559"
/codon_start=1
/transl_table=11
/fullproduct="qcoverage 100 , hcoverage 100 , similarity
100 , identity 100 , evalue 6.47e-287 , alnlength 454 ,

```

Bacteria , Proteobacteria , WP\_015589298.1 MULTISPECIES:  
 NADH-quinone oxidoreductase subunit N [unclassified  
 Wolbachia]"

/cog="NuoN COG1007 475 NADH:ubiquinone oxidoreductase  
 subunit 2 (chain N)"

/pfam="Oxidored\_q1"

/tigr="TIGR01770 NDH\_I\_N 472 proton-translocating  
 NADH-quinone oxidoreductase, chain N"

/product="NADH-quinone  
 oxidoreductase subunit N"

/translation="MNYIQILPETFSIISLVLLLLGIIFNRRTINLLALGCTVVTLI  
 ILIISAENNEIFLNSLLKLNLYIRSAQGLILSTGILILLMLNLSKYDYKEYFSILIL  
 FALFGMITLVSANSLISFYLA FELMSISLYVLASFNKDSAYSCEAGVKYFTLSALSSC  
 IMLYGMSLLYGYTGQVNFSELGSFLQSHQITYGIVFGLVFILIGLCFKLAIAPFHMWA  
 PDVYQGAPTIVTAFSTAPKAALVTFLIRLMNEELVNVKSYVQPIFLYVSALSVLISA  
 FGALRQQNLKRLLAYSSIGHIGFIFASLSIFTQAGTDSALMYLVIIITSIGLFSYLV  
 QIDDDDCDIANLSGIGKKRPVAFHLSVLLLSMSGIPPLAGFIAKFFIFKSLINSGFI  
 SLSLILVIASVISCYYYLNIMKVMYFDKASGNKVAYS KGLFIITSVASLINLVFLYV  
 LLTH"

/besthit="qcoverage 100 , hcoverage 100 , similarity 100  
 , identity 100 , evalue 6.47e-287 , alnlength 454 ,  
 Bacteria , Proteobacteria , WP\_015589298.1 MULTISPECIES:  
 NADH-quinone oxidoreductase subunit N [unclassified  
 Wolbachia]"

gene complement(3292..4734)

/locus\_tag="wEsol\_01560"

CDS complement(3292..4734)

/locus\_tag="wEsol\_01560"  
 /codon\_start=1  
 /transl\_table=11  
 /fullproduct="qcoverage 100 , hcoverage 100 , similarity  
 99.8 , identity 99.8 , evalue 0.0 , alnlength 480 ,  
 Bacteria , Proteobacteria , WP\_015589297.1 MULTISPECIES:  
 NADH-quinone oxidoreductase subunit M [unclassified  
 Wolbachia]"

/cog="NuoM COG1008 497 NADH:ubiquinone oxidoreductase  
 subunit 4 (chain M)"

/pfam="Oxidored\_q1"

/tigr="TIGR01972 NDH\_I\_M 486 proton-translocating  
 NADH-quinone oxidoreductase, chain M"

/product="NADH-quinone  
 oxidoreductase subunit M"

/translation="MLLSIFLLPLIGALILSLIRINHQSIHLRFLALFFAVLPFLLS  
 IVACIEFDYNNADFQFVSYPPIRNVGIGIDGISLLFLLLTTFLFVICILYNCKMSYTTL  
 SPYMAFLLLLESFVVGFFVSLNAISFYVFFEAVLIPMFFIIGIWGGKHRVYATFKLFL  
 YTLTGSLLELLGLVYIYSTFGTFNIQKLATLVPSLDLEVQSLLWIAFFISFAIKVPMF  
 PFHTWLPDAHVQSPTSGSVILAGLLIKMGYGFLRFSIPMLPQASLYFSNFFVVLII  
 AVIYASLVAFQAQDDIKKLIAYSSIGHMGIVTAGLFSFCEEGLVLSIFQMISHGLISAA  
 LFLCVGMLYTRTGTLIAKYFGIVNTMPKFGFMFILFSMASIGLPGTSGFIGEFLAMV  
 GMFKSIGFFTGFIALGTILSAVYMLNLCKQIIWGVSYSKLLNNRLDSIEFSVLILLAV  
 FVILLGFYPTLALNYLKPCMANLLVKYNAL"

/besthit="qcoverage 100 , hcoverage 100 , similarity 99.8  
 , identity 99.8 , evalue 0.0 , alnlength 480 , Bacteria ,  
 Proteobacteria , WP\_015589297.1 MULTISPECIES:  
 NADH-quinone oxidoreductase subunit M [unclassified  
 Wolbachia]"

gene complement(4738..5637)

/locus\_tag="wEsol\_01561"

CDS complement(4738..5637)

/locus\_tag="wEsol\_01561"

```

/codon_start=1
/transl_table=11
/fullproduct="qcoverage 100 , hcoverage 86.9186046511628
, similarity 99.0 , identity 98.3 , evaluate 1.10e-206 ,
alnlength 299 , Bacteria , Proteobacteria , EAL60027.1
NADH dehydrogenase I, L subunit, partial [Wolbachia
endosymbiont of Drosophila simulans]"
/cog="NuoL COG1009 606 NADH:ubiquinone oxidoreductase
subunit 5 (chain L)/Multisubunit Na+/H+ antiporter, MnhA
subunit"
/pfam="Oxidored_q1 NADH5_C Oxidored_q1_C"
/tigr="TIGR01974 NDH_I_L 630 proton-translocating
NADH-quinone oxidoreductase, chain L"
/product="NADH dehydrogenase I, L subunit,
partial"
/translation="MFMACGLSAYNVAIFHLMTHAFFKALLFLGAGNVIHAMHHEQNI
QKMGNCWKKIPCTYALMWIGSLALSGIFPFAGFYSKDLIEHAYSTDSFAFVISLVVA
FFTAFYSWRLLLLVFHSQKQSKINIHEAQKIMLIPLLILAFGSVFSGVWGANILNITS
NAFWKSSLVVVDEHGVHNFFIKLLPTLASLSGIALAYLIYQYQVIRQIKSKFLLKFLQ
NKWYFDEVYEFVIIAPIRFISRLWKFVDKAIDSFGPNGVVRLVNECSKSSIKLQTGY
IFDYALIMFVTLLIIGALYIIGIK"
/besthit="qcoverage 100 , hcoverage 86.9186046511628 ,
similarity 99.0 , identity 98.3 , evaluate 1.10e-206 ,
alnlength 299 , Bacteria , Proteobacteria , EAL60027.1
NADH dehydrogenase I, L subunit, partial [Wolbachia
endosymbiont of Drosophila simulans]"
gene complement(5772..5915)
/locus_tag="wEsol_01562"
CDS complement(5772..5915)
/locus_tag="wEsol_01562"
/codon_start=1
/transl_table=11
/product="hypothetical protein"
/pfam="Oxidored_q1"
/tigr="TIGR01974 NDH_I_L 630 proton-translocating
NADH-quinone oxidoreductase, chain L"
/translation="MGKSAQLGLHVWLPDAMEGPTPVSALIHAATMVTAGIFLVAKVF
FIV"
/cog="NuoL COG1009 606 NADH:ubiquinone oxidoreductase
subunit 5 (chain L)/Multisubunit Na+/H+ antiporter, MnhA
subunit"
/besthit="qcoverage 89.3617021276596 , hcoverage
24.2774566473988 , similarity 100 , identity 100 , evaluate
2.04e-19 , alnlength 42 , Eukaryota , Arthropoda ,
GFS92449.1 NADH-quinone oxidoreductase subunit L [Nephila
pilipes]"
gene complement(6019..6552)
/locus_tag="wEsol_01563"
CDS complement(6019..6552)
/locus_tag="wEsol_01563"
/codon_start=1
/transl_table=11
/fullproduct="qcoverage 94.9152542372881 , hcoverage 87.5
, similarity 98.2 , identity 97.0 , evaluate 2.70e-105 ,
alnlength 168 , Bacteria , Proteobacteria , EAL60141.1
NADH dehydrogenase I, L subunit, partial [Wolbachia
endosymbiont of Drosophila simulans]"
/cog="NuoL COG1009 606 NADH:ubiquinone oxidoreductase
subunit 5 (chain L)/Multisubunit Na+/H+ antiporter, MnhA
subunit"

```

```

/pfam="Oxidored_q1_N Oxidored_q1"
/tigr="TIGR01974 NDH_I_L 630 proton-translocating
NADH-quinone oxidoreductase, chain L"
/product="NADH dehydrogenase I, L subunit,
partial"
/translation="MVRYLQHFLEKDVFGQLVTTAGIGISAVLSWYVFLTFSENYHLS
LFPLFSLSVLKVNWAISVDALSSMLIVITTVSLVHLYSIGYMEHGKSRFFSYLSLF
TFCMIVLVSDNFVQLFFGWEGVGLCSYLLIGFWFQKYSANNAAIKAFVVRVGDFA
LIGIFLIYYTFHSLKFY"
/besthit="qcoverage 94.9152542372881 , hcoverage 87.5 ,
similarity 98.2 , identity 97.0 , evalue 2.70e-105 ,
alnlength 168 , Bacteria , Proteobacteria , EAL60141.1
NADH dehydrogenase I, L subunit, partial [Wolbachia
endosymbiont of Drosophila simulans]"
gene complement(6899..>7520)
/locus_tag="wEsol_01564"
CDS complement(6899..>7520)
/locus_tag="wEsol_01564"
/codon_start=1
/transl_table=11
/fullproduct="qcoverage 94.6601941747573 , hcoverage 100
, similarity 100 , identity 100 , evalue 4.08e-122 ,
alnlength 195 , Bacteria , Proteobacteria ,
WP_006279581.1 MULTISPECIES: NADH-quinone oxidoreductase
subunit J [Wolbachia]"
/cog="NuoJ COG0839 166 NADH:ubiquinone oxidoreductase
subunit 6 (chain J)"
/pfam="Oxidored_q3"
/product="NADH-quinone
oxidoreductase subunit J"
/translation="KLVTIVAVKVSMPPFFFYFFAILSILSAVCVISVRNPVHAVLFLI
FTFVN SAVLFILLGAEFIAMMVMIVYIGAVAVLFLFVVMMLDIDYIRLRQGFAXHCTL
GAMLCVVFFLVISFVIRSSAPNISNVINYNNTNNVKAIGNLLYTDYMYAFHLSGILLLV
AIVGAIALTLQDKKKGVKKQNVLKQLTQSSSVKLIKAKFGKGVEWK"
/besthit="qcoverage 94.6601941747573 , hcoverage 100 ,
similarity 100 , identity 100 , evalue 4.08e-122 ,
alnlength 195 , Bacteria , Proteobacteria ,
WP_006279581.1 MULTISPECIES: NADH-quinone oxidoreductase
subunit J [Wolbachia]"

```

#### ORIGIN

```

1 taatttttta taggagttaa tatgagtaat tacagtgtaa aagaaagcga aaaagactat
61 gaatcaatag gaagaatagt cgaagacgaa tatagaataa tagatgacat agaagtcaaa
121 attaagccta aatcttttga gagcaataaa gaaaagaatg cgtcggttg tttatgttcac
181 aaagttctag acaaactaat cacagaatta aacgacacat ttgtttctga cttggattac
241 caattgaggc ttaatgcaaa ctatgttcag aataaattga gtaaggattt atatgatttg
301 gacaaggtag ttatcgatac tagtaagaat tatgaaaatt tggaaaaaaa ctttaataat
361 ctaagagaag aagttgaaaa attaaaaata ggaacggtta gtgatgacaa catagatgaa
421 tgggaagcac caactcacca tgatatatta tagtagttaa gaaagtcaca gcttgctagc
481 aggctgtgac tctctctaca taccgtttca atacagccag gttaaggaat ctatttttaa
541 actttcggca tatagttctc atcatgtttt gcaaacaccg tatctgcaag aaaggtatta
601 ttatcaaaca ttttaccttg cacaacaaca ccactttttt ctgaaaacat tgggtggaagt
661 attccctggt attttaccac aacgcttttg ttaaaatctg tcatttgaaa aactacttca
721 ctttcgctcc gtatcacact atcttcaaca accattccac caatatggat tggcttttga
781 ctatttggtt aaactattgc ctcacttact gtatagaaaa atgagatatt ttctttgagc
841 gttgttaaaa taaaaaagac tatgcagctt aaaaagcaga aaattcctga agttataagt
901 aatcgcttat gtttcttctt cattattatc tttcaggctt tctagaattt ttttactttt
961 aatatagcaa gaaatggtaa aaatcagttc tccggtaatc aacgtaaaac taataaggta
1021 agcaaaaatt acatatgtat tcataatgca ctgccataa ataactcacc tgcatacaaa
1081 taaattaagc ttccatcctt ttgctgcaac accaatttac cactttttatc tatatcagca
1141 aaaattcctt catacaattt gtcagctaac tttacactga tttgttcatt cattttgaat

```

|      |             |             |             |             |             |             |
|------|-------------|-------------|-------------|-------------|-------------|-------------|
| 1201 | gcttttttta  | accacatttc  | tcttatagca  | taaaacccat  | caaatagcca  | ttgcttttctt |
| 1261 | agcttattaa  | aattttattat | taattttttt  | agtagatcta  | tgttagacac  | agactcaccg  |
| 1321 | taattgctaa  | tgcacgttgt  | tcctggaagt  | ggtgcatgat  | tgacattaat  | tccaattcct  |
| 1381 | ataatgagcc  | aattcgaatt  | ggatcttttt  | tcaagcaata  | ttccacttat  | tttcttgcca  |
| 1441 | tcgattagaa  | tgtcattttg  | ccattttatac | tggagattta  | gaccattttat | aaatgacagt  |
| 1501 | atagtatttc  | caacagcaag  | agcagtaaca  | aaagtcaatt  | ctgttaattt  | gctgacatcc  |
| 1561 | gcaattttat  | tcaccaaacc  | cctctctgtc  | atcccaatgc  | cctctgatgt  | catcccagtg  |
| 1621 | cttgacactg  | ggatccattc  | ttcttttttt  | ctagattcca  | gcgtcacgcg  | ctggaatgac  |
| 1681 | accgaaagct  | ggctttcatt  | aagataatcg  | ttaaagaggt  | ttattaccaa  | actcgcataa  |
| 1741 | aaattaccct  | ctggagaaat  | ccagtttttt  | ccagtgcgcc  | ctctaccctc  | tgtttgttta  |
| 1801 | tcggcaataa  | taacggtttc  | atttgatatt  | cctctcccaa  | ttaaatccaa  | cgcttcttta  |
| 1861 | ttagtgcctg  | aaacttcttt  | gtaatgatga  | atatgaaaac  | cctcagggat  | caccttgcca  |
| 1921 | gtccttttagt | tcaatgagtg  | agtaaaacgt  | acaagaaaag  | aacgaggttg  | atcagtgaag  |
| 1981 | ccactgaagt  | aataatgaat  | agacccttag  | aataagcaac  | cttattacca  | ctagctttat  |
| 2041 | caaaatacat  | aactttcatg  | atattttaaat | aatagtagca  | tgatatcaca  | ctcgctatta  |
| 2101 | caaggatcaa  | ggacaggctg  | ataaagccag  | aattttattaa | acttttgaat  | ataaaaaatt  |
| 2161 | tagcgataaa  | acctgcaagt  | ggaggtattc  | ccgacatcga  | gagtaacagc  | acagaaagat  |
| 2221 | gaaatgctac  | aattgggcgt  | ttcttcctta  | taccagataa  | atttgcaata  | tcacaatcgt  |
| 2281 | catcgtcaat  | ttgtacgaga  | tatgagaata  | gccctatgct  | tgtgatgata  | tatatacca   |
| 2341 | gatacattaa  | ggcactatct  | gttcctgctt  | gtgtaaaaat  | agaaagtga   | gcaaataata  |
| 2401 | aaccaatgtg  | accaattgaa  | ctgtaagcaa  | gcagcctttt  | taagttttgc  | tgacgcaagg  |
| 2461 | ccccaaaagc  | tgagataaag  | acagacaatg  | ctgaaacgta  | taagaaaata  | ggctgaacat  |
| 2521 | aacttttttac | atttactaac  | tcttcattca  | tcaatcgaat  | taaaaaatgtt | acaagtgcag  |
| 2581 | cttttgagagc | tgtagaaaaa  | aacgcagtta  | ctatggtagg  | tgccacttga  | tagacatctg  |
| 2641 | gagcccacat  | atgaaaagga  | gcaatagcaa  | gcttgaaaca  | caaaccaatt  | aggataaaga  |
| 2701 | ctaataccaaa | aactattcca  | taagttatct  | gatggctttg  | caagaatgaa  | ccgagctcag  |
| 2761 | agaaattgac  | ttgtcctgta  | tatccataaa  | gcagcgacat  | tccatatagc  | ataatgcagg  |
| 2821 | aagatagtgc  | actaagtgta  | aaatatttca  | ctcctgcttc  | acatgaataa  | gctgaatctt  |
| 2881 | tattaaagct  | cgcaagaaca  | tacaaagata  | tactcatcaa  | ctcaaaagct  | aaataaaaaag |
| 2941 | aatcagact   | atttgctgaa  | accaaagtta  | tcatgccaaa  | tagcgcaaaa  | agaatcagta  |
| 3001 | ttgaaaattc  | atattttatag | tcatattttg  | ataaattcag  | catcaaaagt  | attaaaattc  |
| 3061 | ctgtgctgag  | aattaaccct  | tgggctgacc  | tgatgtataa  | attgagtttt  | aacaacgaat  |
| 3121 | taaagagaaa  | aattttcattg | ttttctgccc  | aaataattaa  | aataatcaaa  | gttaccactg  |
| 3181 | tgacagccaa  | tgctaataag  | ttgatagttc  | ggcgggttaa  | tataattcca  | agcagcagca  |
| 3241 | acactaacga  | ggagataata  | gagaacgttt  | ccggcaatat  | ctgtatataa  | ttcatagcgc  |
| 3301 | attatatattg | actaacaaat  | ttgccataca  | tggcttcaaa  | taattcagtg  | caaggggttg  |
| 3361 | gtagaatcca  | agcaaaaata  | caaacactgc  | aagcagaatt  | aagacagaaa  | attctatgct  |
| 3421 | atccaagcgg  | ttattttaata | atttagaata  | gctaaccctt  | catattattt  | gcttacataa  |
| 3481 | attcagcata  | taaactgcgc  | ttaaaatagt  | gccaaagtgc  | ataaatcctg  | taaaaaaccc  |
| 3541 | tatgctctta  | aacattccaa  | ccatagccaa  | aaactcacct  | atgaatccag  | atgttccagg  |
| 3601 | tagccctatt  | gaagccattg  | aaaataaaaat | gaacataaaa  | ccaaattttg  | gcatttgtgt  |
| 3661 | tactatgcc   | aaatattttg  | caatctccaa  | agttccagtt  | cgagtatata  | gcattccaac  |
| 3721 | acacaaaaat  | aaagcagcag  | aaataaggcc  | atgactaatc  | atttgaaata  | tgctaccag   |
| 3781 | tactccttcc  | tcacaaaaatg | aaaagaggcc  | agcagtaacg  | atccccatat  | gtcctattga  |
| 3841 | agaataagct  | attaacttct  | ttatatcatc  | ttgagcaaac  | gcaactagag  | aagcatatat  |
| 3901 | taccgcaata  | atgctcagca  | caacaacgaa  | atttgaaaaa  | tacaaaactg  | cctgaggaag  |
| 3961 | cattggaata  | gaaaacctta  | aaaatccata  | tccccccatt  | ttaataagca  | agccagctaa  |
| 4021 | aatcacagat  | ccagaagttg  | gtgattgcac  | atgcgcatca  | ggaagccaa   | tgtgaaatgg  |
| 4081 | aaacatcgg   | actttttattg | caaaagaaat  | aaaaaatgca  | atccatagca  | atgactgcac  |
| 4141 | ttcaagatca  | agacttggca  | ctaattgtagc | taatttttgt  | atattaaacg  | tccccaaaagt |
| 4201 | gctatagatg  | tacaccaagc  | caagtaggaa  | taataatgag  | ccagttaatg  | tataaagaaa  |
| 4261 | caacttaaac  | gttgcatata  | cctgtgtttt  | tcctccccag  | atgccataa   | taaagaacat  |
| 4321 | tgggtattaaa | acagcttcaa  | aaaacacata  | aaagcttata  | gcattcagtg  | aaacgaaaaa  |
| 4381 | accgactaca  | aaactctcaa  | gcagtagaaa  | caatgccata  | tatggactga  | gggtcgtata  |
| 4441 | actcattttg  | cagttgtaga  | gtatacaaat  | tacaaacaag  | aaagttgtaa  | gcagaaggaa  |
| 4501 | aagcaacgat  | ataccatcta  | tccctattcc  | aacattttcta | attgggtagc  | tgacaaactg  |
| 4561 | aaagtccgca  | ttgtttataat | caaattctat  | acaagctaca  | atgctaagca  | aaaatggaag  |
| 4621 | tacagcaaaa  | aatagggcaa  | ggaatcttag  | gtgtatagat  | tgatgattaa  | tcctgattaa  |
| 4681 | ggataaaaatc | aacgctccta  | tcagtggaa   | caagaatata  | ctaagtaaca  | acaccttcta  |
| 4741 | tttaattcca  | ataatatata  | aagcaccgat  | tattaaagta  | acaaacataa  | taagtgcata  |

```

4801 atcaaataata taaccagttt gcaactttat agaacttttt gaacattcat taaccaacct
4861 tacaacacca tttggtccaa atgaatcaat agccttaaca tcaaacttcc atagaagcct
4921 agatataaac cttattggtg caattataac aaactcatac acctcatcaa agtaccattt
4981 attctgcaaa aatttaagta aaaatttact cttaatttgc ctaattactt gatattggtg
5041 aattaggtac gcaagtgtac ttccacttag gctcgccaag gttggcagta gttttataaa
5101 gaaattatga actccatgct catcaaccac cactaaactt gatttccaaa acgcattact
5161 agttatgttc aaaatatattg ctccccacac tccagaaaat actgatccaa aagcgagtat
5221 cagtaatggt ataagcataa tcttctgtgc ctcatgtata ttaattttac tttgtttttg
5281 gctgtggaac acaagaagca ataacctcca agagtaaaac gctgtgaaga atgcaacaac
5341 taagcttatt acaaaagcaa agctatccgt gctataagca tgttcaatta tcaaactcctt
5401 tgagtaaaaa cctgcaaagt ggaatatccc agaaagcgca agagacccaa tccacatgag
5461 agcgtaagtgt caagggattt tcttccagca atttccattt ttctgaatgt tttgctcatg
5521 atgcattgca tgaatcacat tgccagcacc aagaaatagt agagctttta aaaaagcgtg
5581 tgtcattaaa tgaaaaatag caacattgta agcagaaagc ccacatgcca tgaacatata
5641 accaagttga ctgcaggttg aataagcaat tatttttctt tatatcgttc tgagtaatcg
5701 caacggtggc tgcaaaaaaa gcagtgtgtg ctccaacgat aactattaat tctcgtgcc
5761 catttgataa ctcaaacaat gaagaacact tttgctacta aaaatatacc tgctgttacc
5821 atcgttgctg cgtgaatgag tgcagaaaca ggggttggcc cttccattgc atctggcaac
5881 caaacatgta aaccaagctg tgcagattta ccatacagc caataaaaag taatatgcat
5941 attatatgaa ttactttgaa ttcacagcag aatgccctaa tgttctgcgc gccagaaga
6001 tcagctgtgt caaaaacttc agtaaaattt caaagagtga aatgtataat aaataagaaa
6061 gattccaatc aatagtgcaa agtctcctac cctattcaca acaaagtctt taattgctgc
6121 attatttgca gaatatTTTT ggaacaaaaa tcctatgagt aaataagaac acaggccaac
6181 tccttcccag ccaaaaaaaa gctgcacgaa attatcgctt acaaccagca caatcatgca
6241 aaatgtgaac agcgataggt aagaaaaaaa cctcgacttc ccatgctcca tatagccgat
6301 agaatagaga tgcactacca gcgaaacggt ggtaataaca atcagcatta aggatgagag
6361 agcatccaca ctaattgccc aatttacttt taatacactc aatgaaaaca aaggaaataa
6421 actcaagtga taattttcag agaaggtgag aaaaacatac caagataaaa ctgcagatat
6481 tccaatccct gccgttgtaa ctaactgacc aaaaacatcc ttttctaaaa agtgctgcaa
6541 atagcgaacc aaaaagtggc aaaaatacta ttaatttcag tatatccatc atactttcat
6601 tctttcatta agttcgcttg ttcaacatct atattgccac ggcttctata atatacaacc
6661 aatattgcaa gtcccaactc ctgactccgc tgccgcaaca gtcaacacaa acatcacaaa
6721 gatttgccca actatatcat tcataaaggc agaaaaagca actagattga tgттаатсgс
6781 cagcaataat atttctattg ataacaatat attgattatg ctcttacggt tgatgaaaat
6841 accgcacact cccaacagtg aacaaaatag cagcaactat caaaaaagtг atттаатсct
6901 atttccattc cactcctttt ccaaatttag ccttaatcaa ttttacagat gaagattgcg
6961 tcaattgctt taatacattc tgttttttaa ctctcttttt cttgtcctgc aaagtaagag
7021 caattgcacc gacaattgca acaagtagca gaattccaga aagatgaaaa gcgtacatgt
7081 agtcggtata cagcaaatta ccaatagctt tcacattatt ggtattatag tttataacat
7141 tgcttatatt cgggtgctgag ctgcggatta caaagctgat gactagaaaa aacacaacac
7201 acaacatagc accaagagtг caatgctttg caaaaccctg gcgcaacctt atgtagtcaa
7261 tatcgagcat cataactaca aagaggaaca acaccgcaac cgcaccgatg tatactatca
7321 tcaccatcat agcaatgaac tcagctccaa ggagaataaa aagcactgca gagttaacga
7381 aggtgaaaat taaaaataat actgcatgca caggatttct tacactaatt acgcatacag
7441 cagataaaat gctgagaatt gcaaaaaaat aaaagaaaaa aggcattcat actttaactg
7501 caacaatagt tactaattta

```

//

```

LOCUS      JAQZAU010000133                5804 bp    dna        linear    ENV 17-MAR-2023
DEFINITION MAG: Wolbachia pipientis isolate wEsol contig_59864, whole genome
            shotgun sequence.
ACCESSION  JAQZAU010000133 JAQZAU010000000
VERSION    JAQZAU010000133.1
DBLINK     BioProject: PRJNA929258
            BioSample: SAMN33142973
KEYWORDS   WGS; ENV; Metagenome Assembled Genome; MAG.
SOURCE     Wolbachia pipientis (insect metagenome)
ORGANISM   Wolbachia pipientis
            Bacteria; Pseudomonadota; Alphaproteobacteria; Rickettsiales;
            Anaplasmataceae; Wolbachieae; Wolbachia.
REFERENCE  1 (bases 1 to 5804)

```

AUTHORS Fiutek,N., Couger,B.M., Roy,S., de la Torre,J.R. and Connor,E.F.  
 TITLE Genomic assessment of the contribution of the Wolbachia  
 endosymbiont of Eurosta solidaginis to gall-induction  
 JOURNAL International Journal Molecular Sciences  
 REFERENCE 2 (bases 1 to 5804)  
 AUTHORS Fiutek,N., Couger,B.M., Roy,S., de la Torre,J.R. and Connor,E.F.  
 TITLE Direct Submission  
 JOURNAL Submitted (10-FEB-2023) Biology, San Francisco State University,  
 1600 Holloway Ave, San Francisco, CA 94132, USA  
 COMMENT ##Genome-Assembly-Data-START##  
 Assembly Date :: JUN-2019  
 Assembly Method :: FLYE v. 06-2019  
 Genome Representation :: Full  
 Expected Final Version :: Yes  
 Genome Coverage :: 100.0x  
 Sequencing Technology :: Illumina HiSeq; PacBio Sequel  
 ##Genome-Assembly-Data-END##  
 FEATURES Location/Qualifiers  
 source 1..5804  
 /organism="Wolbachia pipientis"  
 /mol\_type="genomic DNA"  
 /submitter\_seqid="contig\_59864"  
 /isolate="wEsol"  
 /isolation\_source="galls on Solidago altissima"  
 /host="Eurosta solidaginis MN-2018-EFC"  
 /db\_xref="taxon:955"  
 /environmental\_sample  
 /country="USA: Cowling Arboretum, Carleton College,  
 Northfield, MN"  
 /lat\_lon="44.48 N 93.13 W"  
 /altitude="280 m"  
 /collection\_date="2018-11"  
 /metagenome\_source="insect metagenome"  
 /note="metagenomic"  
 gene complement(<1..684)  
 /locus\_tag="wEsol\_01565"  
 CDS complement(<1..684)  
 /locus\_tag="wEsol\_01565"  
 /codon\_start=1  
 /transl\_table=11  
 /fullproduct="qcoverage 95.6140350877193 , hcoverage  
 83.5249042145594 , similarity 93.1 , identity 91.7 ,  
 evaluate 1.92e-118 , alnlength 218 , Bacteria ,  
 Proteobacteria , WP\_187297673.1 hypothetical protein  
 [Wolbachia pipientis]"  
 /translation="MRILTKLKKIMNDKDLFEEDGDNIEENNDKRESRLENENQQNQ  
 EEQHKEKDKQYIIQYIQDYLKVFEDILNQIDEGIDNLDSEYERTMQIKRSIDRLIETLY  
 SQAASEDIDADEFETTKHTRDKSESMKRVREKRRKQAIEEVLSSMFAQQQKELMNAKHL  
 SHGHETAHDDEAKKRVKSSIRGVLFVIAHRMDPRRRAGETADDNEKQAHIHGREAVG  
 GALGALLKTF"  
 /product="hypothetical protein"  
 /besthit="qcoverage 95.6140350877193 , hcoverage  
 83.5249042145594 , similarity 93.1 , identity 91.7 ,  
 evaluate 1.92e-118 , alnlength 218 , Bacteria ,  
 Proteobacteria , WP\_187297673.1 hypothetical protein  
 [Wolbachia pipientis]"  
 gene complement(720..1109)  
 /locus\_tag="wEsol\_01566"  
 CDS complement(720..1109)  
 /locus\_tag="wEsol\_01566"

```

/codon_start=1
/transl_table=11
/fullproduct="qcoverage 100 , hcoverage 100 , similarity
100 , identity 100 , evalue 1.63e-84 , alnlength 129 ,
Bacteria , Proteobacteria , WP_174516995.1 MULTISPECIES:
phage tail tube protein [unclassified Wolbachia]"
/translation="MSKLQLKIKDHDNNFIVLNNIRNLRFTLRNNREEVKDISSFGWR
KVLDSAGSRHITIKINGILDSVLADELLRNSAMLNSNNDYEISFKAKEKIRLRCSVEL
YERYYPDPAAFDSFTVILASAEVVNAFH"
/product="phage tail tube
protein"
/besthit="qcoverage 100 , hcoverage 100 , similarity 100
, identity 100 , evalue 1.63e-84 , alnlength 129 ,
Bacteria , Proteobacteria , WP_174516995.1 MULTISPECIES:
phage tail tube protein [unclassified Wolbachia]"
gene complement(1084..1494)
/locus_tag="wEsol_01567"
CDS complement(1084..1494)
/locus_tag="wEsol_01567"
/codon_start=1
/transl_table=11
/pfam="DUF3168"
/fullproduct="qcoverage 100 , hcoverage 100 , similarity
100 , identity 100 , evalue 8.85e-90 , alnlength 136 ,
Bacteria , Proteobacteria , WP_015588822.1 MULTISPECIES:
DUF3168 domain-containing protein [unclassified
Wolbachia]"
/translation="MEKIQAINELYNSIYAALKANSDLRKYVTNIYDYLPKQVTIPYL
RLRAVNYSNLHMLSNFATKARFSCDIYTYHIDSMFAIRHINLILKSIEGFSSEVILE
SNCAMDQHDEILHSTINFIDILIKGGDNEQITAKN"
/product="DUF3168
domain-containing protein"
/besthit="qcoverage 100 , hcoverage 100 , similarity 100
, identity 100 , evalue 8.85e-90 , alnlength 136 ,
Bacteria , Proteobacteria , WP_015588822.1 MULTISPECIES:
DUF3168 domain-containing protein [unclassified
Wolbachia]"
gene complement(1711..2259)
/locus_tag="wEsol_01568"
CDS complement(1711..2259)
/locus_tag="wEsol_01568"
/codon_start=1
/transl_table=11
/fullproduct="qcoverage 100 , hcoverage 100 , similarity
99.5 , identity 99.5 , evalue 3.40e-123 , alnlength 182 ,
Bacteria , Proteobacteria , WP_015588823.1 MULTISPECIES:
head-tail connector protein [unclassified Wolbachia]"
/pfam="Pfam-B_1622 Phage_connect_1"
/tigr="TIGR02215 phage_chp_gp8 188 phage conserved
hypothetical protein, phiE125 gp8 family"
/product="head-tail
connector protein"
/translation="MSIRSTSPRISVQRKSKPESFPVTLEEVKSFLRIENNQDDKLIS
DLIFMATDYAEWHMEKSLVKQQTWQVSYEDYVSRRIYLSYGPVSKI VLATAMMSKNQEK
RTLKYYFSDVGGYVEFFNCLNAIRVDVVEAGYDNVPEQIKLGIMRHVSALYKNRESE
VSSHLSEVKKVYSPFREPKVVL"
/besthit="qcoverage 100 , hcoverage 100 , similarity 99.5
, identity 99.5 , evalue 3.40e-123 , alnlength 182 ,
Bacteria , Proteobacteria , WP_015588823.1 MULTISPECIES:
head-tail connector protein [unclassified Wolbachia]"

```

```

gene      complement(2396..2707)
          /locus_tag="wEsol_01569"
CDS       complement(2396..2707)
          /locus_tag="wEsol_01569"
          /codon_start=1
          /transl_table=11
          /fullproduct="qcoverage 100 , hcoverage 100 , similarity
100 , identity 100 , evalue 3.02e-61 , alnlength 103 ,
Bacteria , Proteobacteria , WP_015588824.1 MULTISPECIES:
hypothetical protein [Wolbachia]"
          /translation="MKTFTKNFKNNEKKLEEFNKEIEDITTIAQDKFAHELENIAYDS
VQKFRSLLAKELNSTFNNIHSQNVNLLKSSLVEYAISSNFINKKGETALIRSLNIFI
R"
          /product="hypothetical protein"
          /besthit="qcoverage 100 , hcoverage 100 , similarity 100
, identity 100 , evalue 3.02e-61 , alnlength 103 ,
Bacteria , Proteobacteria , WP_015588824.1 MULTISPECIES:
hypothetical protein [Wolbachia]"
gene      complement(3036..5135)
          /locus_tag="wEsol_01570"
CDS       complement(3036..5135)
          /locus_tag="wEsol_01570"
          /codon_start=1
          /transl_table=11
          /pfam="Pfam-B_9769 Ank_4 Ank_2 Ank_5 Ank Ank_3 Ank_4
Pfam-B_1873 Ank_5 Ank_2 Ank Ank_4 Ank_3 Pfam-B_1892 Inca
GAS Inca bZIP_1 GAS bZIP_1 Phage_GP20 GAS"
          /fullproduct="qcoverage 98.5693848354793 , hcoverage
86.6666666666667 , similarity 88.4 , identity 88.4 ,
evalue 3.36e-247 , alnlength 689 , Bacteria ,
Proteobacteria , WP_174516996.1 ankyrin repeat
domain-containing protein [Wolbachia endosymbiont of
Cardiocondyla obscurior]"
          /translation="MLRQELREDKPYRQGTLQPNNKTPGDSAMGGNKITA AVQAWNA
RDQKENNGITPNSRKIYVQDEDEQTSSNSITNENNINKVDDTLERELAKRDAVAQKLQ
EAEQRLANNQKRIEHN DLHSQHPEQYTTYNGEQTF LNKSSSDNSGICFDGDGSEALGQ
SILENGEDIDAQDKDGV TPLHWAVADNNKELAKLLIKHGADVDARNRDKHTPLHYAAV
HGYVEIAKY LIDNGANVNAQDQDEHIPLYFPVTNDNKELAKLLIKYGADRSLIKDEDL
IDRLNSMCDQPSEVVPSTF SHSKTHNATETPEKA EKVEKRKAKLKE LH TQLKDEQKKN
ELLKQKIQDLESKN T T LNSELEKTKTKKNEVPLEKAQKELTELKSYITGHGARLDTLE
KLNEENESLRQEIKNLKNENTTLNSELEKTKTKKNEVPLEKAQKELTELKSYITGHGA
RLDTLEKLNEENESLRQEIKNLKNENTTLKGELEKTKTKKNEVPLEKAQKELTEL RNC
VTEHETKLEVLEKLNEENESLEQKIQDLESKN T T LNSELEENENKHSKTKV LLEKAQK
ELAESKSCIVGHETK LKQFNKENESLTQKIKSLENENTPLEGELGKTKTNEVSLEKVG
KRQFSPKVAYASLAAMLAVGAALS IASGLSVLLIVAASVVSALIAGGITYTISKPIAP
DTELKEVNIQGSAQRCL"
          /product="ankyrin repeat domain-containing
protein"
          /besthit="qcoverage 98.5693848354793 , hcoverage
86.6666666666667 , similarity 88.4 , identity 88.4 ,
evalue 3.36e-247 , alnlength 689 , Bacteria ,
Proteobacteria , WP_174516996.1 ankyrin repeat
domain-containing protein [Wolbachia endosymbiont of
Cardiocondyla obscurior]"
gene      complement(5098..5616)
          /locus_tag="wEsol_01571"
CDS       complement(5098..5616)
          /locus_tag="wEsol_01571"
          /codon_start=1
          /transl_table=11

```

```

/product="hypothetical protein"
/pfam="Pfam-B_1714 Ank_5 Ank_3 Ank_2 Ank Ank_5 Ank_4
Ank_3 Ank"
/translation="MEKKKFFEIINEVSKSEGLNENLLERTGSELRDADSIVYSTYN
NLKIDKMF SILDSDKIVNYMLVHLAVECNSVPIVKLLLLAKEAKVNEPIYELDEAKSKL
TALHIAALHGHQEIAQLLLNNNANPLLKDSQGRTPRDI VGDVKGKKAIKMLEEGEQR
YAETRATRQTL"
/besthit="qcoverage 98.8372093023256 , hcoverage
68.2730923694779 , similarity 98.2 , identity 95.3 ,
evalue 9.12e-104 , alnlength 170 , Bacteria ,
Proteobacteria , WP_223823045.1 ankyrin repeat
domain-containing protein [Wolbachia pipientis]"

```

# ORIGIN

```

1 aaacgttttt aacaatgcac ctaaagctcc accaactgct tccctgccat gtatatgagc
61 ttgcttttcg ttatcgtcag cagtttcccc tgccctcctt cttggatcca tcctatgagc
121 aatcaccgaa aacaacactc ccctgattga agacttcact cgtttccttg cttcatcatc
181 atgtgctggt tcatgtccat gacttaagtg tttagcggtc attagctcct tttgttgctg
241 ggcaaacatg ctacttaata cttcttctat cgcttgcttc cttcttttct ctctaactct
301 tttcatagat tctgatttat cgcgagtatg ctttgtgggt tcaaattctg catcaatatt
361 ttcagacgca gcctgactat ataaagtctc tatgagcctg tctatgcttc gctttatttg
421 catagtcctt tcgtaactat ctaaattatc aattccttcg tcgatctgat ttagaataatc
481 ctcaaaaact ttcaaatagt cttgaatata ctgtattatg tattgcttat ctttctcttt
541 gtgttggtct tcttgatttt gctgattttc attttctaaa cttctctctc ttttatcatc
601 gttattttct tcaatattat caccgtcttc ctcgaaaagg tctttgtcgt tcatgatttt
661 ttttaattta gttaaaattc tcaccagtta ctattgtata tgaaaaaatt aaattaacat
721 taatgaaaag cgtttacaac ttcagcactc gctaaaatta cagtaaaact gtcaaaagca
781 gcgggggtcat aatacctctc atacagttca actgagcacc taagccttat cttttcctta
841 gccttaaaac taatttcata atcattatta gagtttagca tagcagaatt acgtaataat
901 tcatcagcta atacagagtc taaaattcca ttaattttta tcgtaatatg tctgcttcca
961 gcagaatcca atacttttct ccagccaaaa gaagaaatat cttttacctc ttctctgtta
1021 ttacgcaaag taaaccttag gtttcgtata ttatttaaca caataaaatt attgtcatga
1081 tctttaattt ttagctgtaa tttgctcatt atcacctcct tttattaaaa tatcaaaatt
1141 aattgttgaa tgtaaaattt catcgtgctg atccatagca caattacttt ctaaaatgac
1201 ctactacta aaaccttcaa tgctcttaag tatcaagtta atatgcctta taatggcaaa
1261 catactgtct atatgataag tatatatgtc gcatgaaaat cttgcctttg tagcaaaatt
1321 ggacagcata tgcagggttg tataattcac tgcgcgcaat ctcaggtaag gaatgggtgac
1381 ctgttttaggt aagtagtcat aaatgttagt aacatatattt cttaaatcag aatttgctt
1441 tagtgctgca taaatgctat tgtacaactc atttatagct tgaatttttt ccataatgaa
1501 tcctcgtaaa gatatatagc taaaacataa gcagcatttc ccgatacaaa ctcgtcatcc
1561 cgctacttgt tagcgggatc tatgttaaga gataccgcca atgaatcgcg gtatgacgat
1621 aaggtttata cctcgctcatc ccgctgcttg ttagcgggat ctatccgtaa cgggatgacg
1681 tagtagccca gtttggtatg caagaaagag ctacaacaca acctttgggt cgcgaaacgg
1741 agaataatcc ttcttcaact cagataaatg gctacttacc tccgattcac gatttttgta
1801 aagagcagaa acatgccgca taatacctag ttttatctgc tcaggaacat tgtcatagcc
1861 agcctcgtat acaacatcaa ctcttatttg attcaaaca ttgaaaaact caacgtagcc
1921 ccctacatca ctaaaataat acttaagtgt tctcttctct tgatttttag acatcattgc
1981 agtagccaat actatcttac tcacagggcc atagcttaaa tagatcctac gagatacata
2041 atcttcatat gaaacttgcc atgtttgctt tactagttag ttttccatat gccactcagc
2101 ataactcagt gccataaaaa ttagatctga aatcaactta tcatcctggg tgttctcaat
2161 acgtaaaaaa gatttaacct cttctaaagt aactggaaaa gattcagggt tagatttacg
2221 ttgcacagat attcttggtg aagtagatct tattgacata ataaccctcc tttttgatat
2281 agctagaata agtaagggtt acctcgtgat agcatggggc aaatcttact tacttttagc
2341 atgcagcttg catgcaacat taagttagat tggcgcagca acaactctga gtgctttatc
2401 gtatgaatat attaagaaga gaacgtatta aagctgtttc tccttttttg ttgataaaat
2461 ttgaacttat agcatattca actaggctag attttagtag attgacattt tgagaatgaa
2521 tattattgaa ggtggaggtt aactctttag caagcagact gcgaaatttc tgcacactgt
2581 catatgcgat gttctcaagt tcatgtgcaa atttatcttg agctatagtt gttatatctt
2641 caatttcctt attaaactcc tctagctttt tttcgttatt tttaaaaatt ttcgtaaaag
2701 ttttcatatc aattaaactc aactactatt atgattataa tgacaatgaa aaactaccga
2761 agtaaaaaat tcacactact gtgtaacttg caaatacttt ttactatagc taaagtggct

```

```

2821 taggtttacc tacaatttga aaaacaacaa attcgtcatc ccgctgcttg ttagcgggat
2881 ctatgctaag agataccgtg acggtatgac ggttcgcggc ggtatgacgt aggactgctg
2941 ggaaaccttt attgggttag ttatagattc cagtgcagct acttgcattc gccacctgca
3001 aactgcaatg ttcgtacaga tgtaggtgct aagttttaca aacaccgttg tgctgaacct
3061 tgaatattca cttctttcaa ttcagtgtca ggagcgatgg gttttgatat tgtgtatgta
3121 atgccaccgg ctatcagtg cagataccaca gaagctgcaa ctattaatag aacagacaat
3181 ccggaagcaa tactaagagc agcacctact gctaacatag ctgcaaggct cgcgtaggca
3241 acttttgggg aaaattgtct ttttctact ttttctagt acacttcatt tgttttagtt
3301 ttgcccagtt caccctcaag tgggtgtgtt tcattctcca gactttttat tttttgtgtt
3361 agtgattcat tctctttatt gaattgtttc aacttagtct catgtccaac tatgcaactt
3421 tttgattctg ctagtctcct ttgcgctttt tctaacaaca cttttgtttt agaatgctta
3481 ttttcgtttt cttctaattc gctattaagt gttgtatttt tactttctag atcttgtatt
3541 ttttgttcta gtgattcatt ctcttcattg agtttctcca gtacttccaa tttagtctca
3601 tgttcagtga cacaatttct caattctgtt agttcctttt gcgctttttc taatggtact
3661 tcgttttttt tagtttttgt tttttctaatt cacccttaa gtgttgtgtt ttcatttttt
3721 agatttttta tttcttgtct tagtgattca ttctcttcat tgagtttctc cagtgtgtcc
3781 agcctagctc catgtccagt gatataactt ttcaattctg ttagttcctt ttgcgctttt
3841 tctaattgga cttcgttttt tttagttttt gttttttcta attcactatt aagcgttgtg
3901 ttttcatttt ttagattttt tatttcttgt cttagtgtt cattctcttc attgagtttc
3961 tccagtgtgt ccagcctagc tccatgtcca gtgatataac ttttcaattc tgttagttcc
4021 ttttgcgctt tttctaattg tacttcgttt tttttagttt ttgttttttc taattcacta
4081 ttaagcgttg tgtttttact ttctagatct tgtatttttt gtttttagcaa ttcattcttt
4141 ttctgctcat ccttttagctg agtatgtaat tcttttaact tagctttacg tttttcaacc
4201 ttttctgctt tttctggagt ttccgttgcg ttgtgtgttt tggaatgaga aaaggtacta
4261 ggtacaacct cagatggctg atcacacata ctgttttagt tatctattag gtcttcatcc
4321 tttatcaatg agcgatctgc tccatatttt atcaaaagtt ttgctaattc tttattgtca
4381 tttgtaacag gaaagtataa agggatatgt tcatcttgat cttgtgcatt aacatttgct
4441 ccattatcta ttagatactt tgcaatctct acataaccat gcacagcagc ataatgtaaa
4501 ggggtatggt tatctctatt tcgtgcatca acatctgctc catgttttat caaaagtttt
4561 gctaattcct tattgttatc tgcaacagcc caatgtaaag gggtcacgcc atctttatct
4621 tgtgcatcaa tgtcttctcc attttctaatt atagattggc cttaaagcttc agatccatct
4681 ccatcaaaac atattccact gttgtcacta ctacttttat ttaaaaaggt ctgttcccca
4741 ttatatgtag tatactgctc tggatgttga ctgtgcaagt cattatgttc tatgcgcttc
4801 tgattattgg caagtctttg ttctgcctct tgcaactttt gcgccacagc atctctttta
4861 gccagttctc tttctaattg atcatctact ttgtttatat tgttttcatt agtgattgag
4921 tttgaagaag tctgttcatc ctcatcttgt acatagattt ttctgctgtt tgggtgtaatt
4981 ccgttgttct ctttctgctc tcttgcgctt catgcttgca ctgcagcagt tattttatct
5041 ccgcccatag ctgaatctcc tggagtttta ttattaggct gcggtaaagt gccttgtcta
5101 taaggtttgt cttctcgtag ctcttgctc agcataacgt tgttctcctt cctctaacat
5161 ttttattata gcctttttac cttttacatc accgacaata tcccttgagg ttcggccttg
5221 actatctttt agtaaaggat ttgcgcttatt gttcaataaa agctgagcta tctcttgatg
5281 accatgcaaa gcagcaatgt gcaaagcagt tagcttagac ttagcttcat caagttcata
5341 tattggttca ttaacttttg cttcctttgc tagtaggagt tttactattg gtacactgtt
5401 acattccaca gcaagatgta ccaacatata atttacaatt ttgtctgaat ctaataactt
5461 gaacatctta tctatcttca aattgttata agtgctatat actattgagt ctgcatctct
5521 tagctcactt cctgttcttt caagtaaat attctcattt aaaccttcac tcttgcttac
5581 ctcatcttatt atttcaaaaa actttttctt ttccattgcc gtaacctttc ctctcaattt
5641 atttattatt gttgaacagt ctcacaaaaa agttaagttt gtctaaattc catgtttgat
5701 ctaaaaatta gtcataaaca ttttctatgc aagtagctga cactggttca ctctataatg
5761 gtgtcacagc agtcctacat catgccaccg cgaaccgtca tacc

```

//

```

LOCUS      JAQZAU010000134                4152 bp    dna        linear    ENV 17-MAR-2023
DEFINITION MAG: Wolbachia pipientis isolate wEsol contig_60337, whole genome
            shotgun sequence.
ACCESSION  JAQZAU010000134 JAQZAU010000000
VERSION    JAQZAU010000134.1
DBLINK     BioProject: PRJNA929258
            BioSample: SAMN33142973
KEYWORDS   WGS; ENV; Metagenome Assembled Genome; MAG.
SOURCE     Wolbachia pipientis (insect metagenome)

```

ORGANISM Wolbachia pipientis  
Bacteria; Pseudomonadota; Alphaproteobacteria; Rickettsiales;  
Anaplasmataceae; Wolbachieae; Wolbachia.

REFERENCE 1 (bases 1 to 4152)  
AUTHORS Fiutek,N., Couger,B.M., Roy,S., de la Torre,J.R. and Connor,E.F.  
TITLE Genomic assessment of the contribution of the Wolbachia  
endosymbiont of Eurosta solidaginis to gall-induction  
JOURNAL International Journal Molecular Sciences

REFERENCE 2 (bases 1 to 4152)  
AUTHORS Fiutek,N., Couger,B.M., Roy,S., de la Torre,J.R. and Connor,E.F.  
TITLE Direct Submission  
JOURNAL Submitted (10-FEB-2023) Biology, San Francisco State University,  
1600 Holloway Ave, San Francisco, CA 94132, USA

COMMENT ##Genome-Assembly-Data-START##  
Assembly Date :: JUN-2019  
Assembly Method :: FLYE v. 06-2019  
Genome Representation :: Full  
Expected Final Version :: Yes  
Genome Coverage :: 100.0x  
Sequencing Technology :: Illumina HiSeq; PacBio Sequel  
##Genome-Assembly-Data-END##

FEATURES Location/Qualifiers  
source 1..4152  
/organism="Wolbachia pipientis"  
/mol\_type="genomic DNA"  
/submitter\_seqid="contig\_60337"  
/isolate="wEsol"  
/isolation\_source="galls on Solidago altissima"  
/host="Eurosta solidaginis MN-2018-EFC"  
/db\_xref="taxon:955"  
/environmental\_sample  
/country="USA: Cowling Arboretum, Carleton College,  
Northfield, MN"  
/lat\_lon="44.48 N 93.13 W"  
/altitude="280 m"  
/collection\_date="2018-11"  
/metagenome\_source="insect metagenome"  
/note="metagenomic"  
gene complement(11..322)  
/locus\_tag="wEsol\_01572"  
CDS complement(11..322)  
/locus\_tag="wEsol\_01572"  
/codon\_start=1  
/transl\_table=11  
/fullproduct="qcoverage 100 , hcoverage 100 , similarity  
100 , identity 100 , evalue 1.60e-74 , alnlength 103 ,  
Bacteria , Proteobacteria , WP\_155968470.1 transposase  
[Wolbachia pipientis]"  
/cog="COG3335 COG3335 132 Transposase and inactivated  
derivatives"  
/pfam="DDE\_3 DDE\_1"  
/product="transposase"  
/translation="MTFKGGCDKEVFNTWLEKMLLPKLPHGTTIVMDNATFHKTPKTK  
ELIDNARCRLLYLPTYSPDLNPIEHCWNTIKSRLRPLMHKYTDLQLLVGNTIMEIYHS  
F"  
/besthit="qcoverage 100 , hcoverage 100 , similarity 100  
 , identity 100 , evalue 1.60e-74 , alnlength 103 ,  
Bacteria , Proteobacteria , WP\_155968470.1 transposase  
[Wolbachia pipientis]"  
gene complement(522..869)

CDS  
 /locus\_tag="wEsol\_01573"  
 complement(522..869)  
 /locus\_tag="wEsol\_01573"  
 /codon\_start=1  
 /transl\_table=11  
 /fullproduct="qcoverage 100 , hcoverage 100 , similarity 100 , identity 100 , evalue 2.74e-74 , alnlength 115 , Bacteria;Eukaryota , Proteobacteria;Arthropoda , WP\_155968342.1 MULTISPECIES: IS630 transposase-related protein [Wolbachia]"  
 /cog="COG3415 COG3415 138 Transposase and inactivated derivatives"  
 /pfam="HTH\_Tnp\_IS630 HTH\_Tnp\_1 HTH\_23 HTH\_28 HTH\_29 HTH\_7 CENP-B\_N Pfam-B\_14738 HTH\_8 HTH\_17 HTH\_24 Pfam-B\_2106"  
 /product="IS630 transposase-related protein"  
 /translation="MAYSVDLRERAVSMIEKGKSKVEVAELLEIGIATLYRWLRKKAA GESLRPSKNGSFIRKIDPKILEEYVKKNPDHTLAEMKQNLGFGINSIWYRLKQLRITL KKSYSISRQSR"  
 /besthit="qcoverage 100 , hcoverage 100 , similarity 100 , identity 100 , evalue 2.74e-74 , alnlength 115 , Bacteria;Eukaryota , Proteobacteria;Arthropoda , WP\_155968342.1 MULTISPECIES: IS630 transposase-related protein [Wolbachia]"  
 gene  
 complement(1077..1487)  
 /locus\_tag="wEsol\_01574"  
 CDS  
 complement(1077..1487)  
 /locus\_tag="wEsol\_01574"  
 /codon\_start=1  
 /transl\_table=11  
 /fullproduct="qcoverage 100 , hcoverage 100 , similarity 100 , identity 100 , evalue 4.62e-67 , alnlength 136 , Bacteria , Proteobacteria , WP\_155968775.1 MULTISPECIES: hypothetical protein [Wolbachia]"  
 /pfam="DUF3461 PDDEXK\_2 Pfam-B\_12708"  
 /tigr="TIGR01784 T\_den\_put\_tspse 273 conserved hypothetical protein"  
 /product="hypothetical protein"  
 /translation="MTSTKLESRMRKVSRTVLKSSEEGRPSSLRQQYADETTDEDL RNIAEKSPIVKLAYDELDFCWNEKDLVAYEERIMDLRKEEAILEYKLEEGIEKGKIE VAKNLLKAGVSVNLIAESTGLSQAEIVQLKQEVA"  
 /besthit="qcoverage 100 , hcoverage 100 , similarity 100 , identity 100 , evalue 4.62e-67 , alnlength 136 , Bacteria , Proteobacteria , WP\_155968775.1 MULTISPECIES: hypothetical protein [Wolbachia]"  
 gene  
 complement(1588..1758)  
 /locus\_tag="wEsol\_01575"  
 CDS  
 complement(1588..1758)  
 /locus\_tag="wEsol\_01575"  
 /codon\_start=1  
 /transl\_table=11  
 /product="hypothetical protein"  
 /translation="MLLNKVQKTRSPYDGDWVYWGKRLRKIPDKPLRVIKLLKLQQSK CDNVDYGLKVM"  
 /besthit="qcoverage 83.9285714285714 , hcoverage 51.6483516483517 , similarity 100 , identity 100 , evalue 2.50e-27 , alnlength 47 , Bacteria , Proteobacteria , WP\_213863468.1 HNH endonuclease [Wolbachia endosymbiont of Ceratitidis capitata]"  
 gene  
 complement(1718..2500)

```

CDS      /locus_tag="wEsol_01576"
         complement(1718..2500)
         /locus_tag="wEsol_01576"
         /codon_start=1
         /transl_table=11
         /pfam="RVT_1 GIIM"
         /fullproduct="qcoverage 100 , hcoverage 100 , similarity
100 , identity 100 , evalue 5.73e-190 , alnlength 260 ,
Bacteria , Proteobacteria , WP_196770138.1 MULTISPECIES:
hypothetical protein [Wolbachia]"
         /translation="MESFNPQNVVQFKEAPLLACVALHGLEQHVKKALTNELFQCMKR
KYGRISHKNAQKSISVIFYCDDFVIIHENEEIILKAKILVEEWLETIGLKLKPSKTRI
SHTLRTIDETKPGFDLGFSSIRQYPTKESKKGYTLLIKPSRNSIKQHTFAIKHKLREM
RGAPQEVIIIRNLNPINRGWSQYYSSVVSCKIFSSLDNTIHRKLWKWAVFRHPNKGKWC
IKRKYFKKYNNNDNWRFMSTSNKVRLTIHSDHVIKQSAKNQISI"
         /product="hypothetical protein"
         /besthit="qcoverage 100 , hcoverage 100 , similarity 100
, identity 100 , evalue 5.73e-190 , alnlength 260 ,
Bacteria , Proteobacteria , WP_196770138.1 MULTISPECIES:
hypothetical protein [Wolbachia]"
gene     complement(2446..2742)
CDS      /locus_tag="wEsol_01577"
         complement(2446..2742)
         /locus_tag="wEsol_01577"
         /codon_start=1
         /transl_table=11
         /fullproduct="qcoverage 100 , hcoverage 87.5 , similarity
100 , identity 100 , evalue 2.21e-68 , alnlength 98 ,
Bacteria , Proteobacteria , WP_196770143.1 MULTISPECIES:
reverse transcriptase/maturase family protein
[Wolbachia]"
         /cog="COG3344 COG3344 328 Retron-type reverse
transcriptase"
         /pfam="RVT_1"
         /product="reverse
transcriptase/maturase family protein"
         /translation="MVLEPEWEAKLEPNTYGFRPGRSCHDAIEAIFDVLKQKTAYVLD
ADISGCFDNINHNKLLNHTNVKENHKKMVKGRRYGRWKVSIHKTWYNSRRHRC"
         /besthit="qcoverage 100 , hcoverage 87.5 , similarity 100
, identity 100 , evalue 2.21e-68 , alnlength 98 ,
Bacteria , Proteobacteria , WP_196770143.1 MULTISPECIES:
reverse transcriptase/maturase family protein
[Wolbachia]"
gene     complement(2818..3105)
CDS      /locus_tag="wEsol_01578"
         complement(2818..3105)
         /locus_tag="wEsol_01578"
         /codon_start=1
         /transl_table=11
         /fullproduct="qcoverage 100 , hcoverage 100 , similarity
100 , identity 100 , evalue 1.06e-55 , alnlength 95 ,
Bacteria , Proteobacteria , WP_196770139.1 MULTISPECIES:
reverse transcriptase N-terminal domain-containing
protein [Wolbachia]"
         /cog="COG3344 COG3344 328 Retron-type reverse
transcriptase"
         /pfam="RVT_N"
         /product="reverse
transcriptase N-terminal domain-containing protein"
         /translation="MNGIPWRKLKSSFKLQKRIYQASKCNDIKKMHNLRLLKSTS

```

```

ARTIAVRRVTQDNRGKKTAGIDGKANLSQKERLQLANSLDIREKAKPSRRV"
/besthit="qcoverage 100 , hcoverage 100 , similarity 100
, identity 100 , evalue 1.06e-55 , alnlength 95 ,
Bacteria , Proteobacteria , WP_196770139.1 MULTISPECIES:
reverse transcriptase N-terminal domain-containing
protein [Wolbachia]"
gene complement(3062..3226)
/locus_tag="wEsol_01579"
CDS complement(3062..3226)
/locus_tag="wEsol_01579"
/codon_start=1
/transl_table=11
/fullproduct="qcoverage 100 , hcoverage 100 , similarity
100 , identity 100 , evalue 2.14e-30 , alnlength 54 ,
Bacteria , Proteobacteria , WP_213863465.1 hypothetical
protein [Wolbachia endosymbiont of Ceratitis capitata]"
/translation="MWKKKLMPKVISGICRRKHFNLEGKVVNSSEYVMDQQKARYEWN
SLAKAEEIFI"
/product="hypothetical protein"
/besthit="qcoverage 100 , hcoverage 100 , similarity 100
, identity 100 , evalue 2.14e-30 , alnlength 54 ,
Bacteria , Proteobacteria , WP_213863465.1 hypothetical
protein [Wolbachia endosymbiont of Ceratitis capitata]"
gene 3279..3626
/locus_tag="wEsol_01580"
CDS 3279..3626
/locus_tag="wEsol_01580"
/codon_start=1
/transl_table=11
/fullproduct="qcoverage 100 , hcoverage 100 , similarity
100 , identity 100 , evalue 2.74e-74 , alnlength 115 ,
Bacteria;Eukaryota , Proteobacteria;Arthropoda ,
WP_155968342.1 MULTISPECIES: IS630 transposase-related
protein [Wolbachia]"
/cog="COG3415 COG3415 138 Transposase and inactivated
derivatives"
/pfam="HTH_Tnp_IS630 HTH_Tnp_1 HTH_23 HTH_28 HTH_29 HTH_7
CENP-B_N Pfam-B_14738 HTH_8 HTH_17 HTH_24 Pfam-B_2106"
/product="IS630
transposase-related protein"
/translation="MAYSVDLRERAVSMIEKGKSKVEVAELLEIGIATLYRWLRKKAA
GESLRPSKNGSFIRKIDPKILEEYVKKNPDHTLAEMKQNLGFGINSIWYRLKQLRITL
KKSYSITISRAQSRR"
/besthit="qcoverage 100 , hcoverage 100 , similarity 100
, identity 100 , evalue 2.74e-74 , alnlength 115 ,
Bacteria;Eukaryota , Proteobacteria;Arthropoda ,
WP_155968342.1 MULTISPECIES: IS630 transposase-related
protein [Wolbachia]"
gene 3826..4137
/locus_tag="wEsol_01581"
CDS 3826..4137
/locus_tag="wEsol_01581"
/codon_start=1
/transl_table=11
/fullproduct="qcoverage 100 , hcoverage 100 , similarity
100 , identity 100 , evalue 1.60e-74 , alnlength 103 ,
Bacteria , Proteobacteria , WP_155968470.1 transposase
[Wolbachia pipientis]"
/cog="COG3335 COG3335 132 Transposase and inactivated
derivatives"

```

```

/pfam="DDE_3 DDE_1"
/product="transposase"
/translation="MTFKGGCDKEVFNTWLEKMLLPKLPHGTTIVMDNATFHKTPKTK
ELIDNARCRLLYLPTYSPDLNPIEHCWNTIKSRLRPLMHKYTDLQLLVGNTIMEIYHS
F"
/besthit="qcoverage 100 , hcoverage 100 , similarity 100
, identity 100 , evalue 1.60e-74 , alnlength 103 ,
Bacteria , Proteobacteria , WP_155968470.1 transposase
[Wolbachia pipientis]"

```

# ORIGIN

```

1 atagtatttt ctaaaatgaa tgataaattt ccattatggt attaccaacc aaaagttgta
61 agtctgtata tttatgcatt aaaggtctga ggcggctttt gatgggtattc caacaatgct
121 ctatagggtt caaatctggt gaatatgttg gtagatagag caaacggcat ctagcattat
181 ctattaactc ctttgttttg ggagttttat ggaatgtggc attgtccata actattgtag
241 taccatgtgg caatttaggt aataacatct tctctaacca tgtattgaat acctctttgt
301 cacaccacc tttgaaagtc attggtgcaa taaatctctt tccaatccac cgcctatta
361 tactgattct ctctcgtttt cttcctggaa tatctgcata aattttcttt cctattggag
421 cacgtccata ctctcggtat aacctattat caactcctgc ttcattctata tataagatgc
481 tggaatggtc tatttttgag attttatcgg taaatcgctg cctatcttct tgattgcgct
541 cttgatatag tgtaactttt ttttaaagta attccttagct gtttcagcct ataccaaatt
601 gaatttatcc caaatccaag attttgtttc atctctgcca gcgatgatc tggattcttt
661 ttaacatatt ctctcgagtat ttttgggtct atttttcgaa taaagctgcc gtttttcgat
721 ggccttaggc tttcaccagc ggctttcttt ctaaccagc ggtacagagt tgctattcct
781 atctccaaaa gctctgccac ctcaaccttt gacttccctt tttctatcat cgatactgcc
841 ctttccctta aatccacact atacgccatt ataactcaa tagcttatta tacctttatc
901 atttactttg ggaagtacta tacttgtaaa cttgagcctg attcaagtat ccgttcagag
961 tgtggcagaa gaacttattc aaataaagta ggtggtaaaa tataaacatt ttataaagtg
1021 aaaaatggac ttttcagacc actgccgagc taaaaaagcc ctgaaaaccg tgatacttag
1081 gccacttctt gcttaagctg tacaatttca gcttgagaaa ggccagtggg ttcagctatt
1141 aaattaacag atacaccagc ttttaagtaa ttttttgcaa cttcgatttt tcctttctct
1201 ataccttctt caagtttgta ttcaagaatg gcttcttctt tacgtagatc cattattctt
1261 tcttcatatg ctactaaatc tttctcattc cagcaaaact tgtctaactc atcatatgct
1321 agctttacta ttggtgattt ttctgctata ttcttaggtt cttcatctgt agtttcatct
1381 gcatactggt gtctaagtga agaaggtcgc ccctcctcac tcgacttcaa aaccgtacgt
1441 gagactttgc gcctcatatg gcttctctct aatttggtgc ttgtcatgca tacctcctgt
1501 gtaattcatc gtgactatgc ccatgtaaca aagataaatt tttgatcata ttgtttcgct
1561 tattccggtc tttatgatgt atttctatta tatcatcact ttcaaaccat agtctacatt
1621 atcacattta ctttgtttgta acttcaatag ttttattact cttaatggct tatctggtat
1681 ttttctcaga cgtttaccct aatataacca atcaccatca tatggagatc tgggtttttg
1741 cactttgttt aataacatga tcgctgtgta tagtaagacg taccttggtt cttgtcataa
1801 agcgccagtt atcgttatta tactttttta agtattttct ttttatccag catttccctt
1861 tgtttgggtg cctaaagact gccacttcc agagctttct atgtatagta ttatccaatg
1921 agctaaagat tttacatgaa actaccgaag agtaatatg actccatcct ctgtttattg
1981 gattgagatt cettattatt acttctctgt gcgccccacg catttctcta agtttatggt
2041 taatagcaaa tgtatgctgc tttatagaat tacgacttgg ttttattaat aatgtgtaac
2101 cttttttact ttcttttggt ggatattgtc ttattgaaaa tccaagaaaa tcaaactcctg
2161 gttttgtttc gtcaatggtt cttaatgtat gagaaattct tgtttttagag ggctttaatt
2221 ttagtccaat ggtttctaac cattcttcaa ctaaaatttt tgctttaaga ataactctct
2281 cgttttcatg tatgatgaca aaatcatcac agtagaaaat tacactaata gacttttgcg
2341 cgtttttatg cgatatccta ccatattttt ttttcatgca ttgaaagagt tcggttggtt
2401 atgctttttt gacatgttgc tctaaccgtt gtaatgcaac acaagctagc aacggtgcct
2461 cettgaattg taccacgttt tgtggattga aactttccat cttccataac gcctgcctt
2521 aaccatcttc ttatgatttt ctttaacgtt ggtgtggttt tcaagcagtt tattatggtt
2581 aatattgtca aaacatccag aaatatcagc atctaataca tatgctgttt tctgttttag
2641 cacatcaaat atggcttcaa ttgcatcatg acatgatcta ccaggtctaa aaccataagt
2701 gtttggctca agttttgcct ccattctctg ttccaacacc atttttacaa gtgtttgttt
2761 tgctcgacac gatatagttg gtataccaag cgggcgatat tccgatggct taccaggtca
2821 gacacgtctt gatggctttg ctttctctct tataatctaag gagtttgcca attgcaatct
2881 ttctttttga ctaaggttag cttttccatc aatacctgca gtttttttcc ctctgttgtc
2941 ctgagttacc cttctaactg cgatcgttct tgcacttggt gatttgagta ataactctctg

```

```

3001 aaggttgtgc atctttttga tatcattaca tttagaagct tggtaaattc gttttttag
3061 cttaaataaa gattttcttca gctttcgcca aggaattcca ttcataccta gctttttgct
3121 ggtccataac atattcacta ctattcacca ctttaccttc caaattaaag tgtttacgtc
3181 tgcataatccc agatattact ttgggcatta gcttcttctt ccacatatag tacttcccaa
3241 agtaaataat aaaggtataa taagctatct gagttataat ggcgtatagt gtggatttaa
3301 gggaaagggc agtatcgatg atagaaaaag ggaagtcaaa ggttgagggtg gcagagcttt
3361 tggagatagg aatagcaact ctgtaccgct ggtaagaaa gaaagccgct ggtgaaagcc
3421 taaggccatc gaaaaacggc agctttattc gaaaaataga cccaaaaata ctcgaagaat
3481 atgttaaaaa gaatccagat catacgctgg cagagatgaa acaaaatctt ggatttgga
3541 taaattcaat ttggtatagg ctgaaacagc taagaattac tttaaaaaaa agttacacta
3601 tatcaagagc gcaatcaaga agataggcag cgatttaccg ataaaatctc aaaaatagac
3661 cattccagca tcttatatat agatgaagca ggagttgata atagggttata ccgagagtat
3721 ggacgtgctc caataggaaa gaaaatttat gcagatatct caggaagaaa acgagagaga
3781 atcagtataa taggcgggtg gattggaaa agattttatt caccaatgac tttcaaaggt
3841 ggggtgtgaca aagaggtatt caatacatgg ttagagaaga tgttattacc taaattgcc
3901 catggtacta caatagttat ggacaatgcc acattccata aaactcccaa aacaaaggag
3961 ttaatagata atgctagatg ccgtttgctc tatctaccaa catattcacc agatttgaac
4021 cctatagagc attgttgga taccatcaaa agccgcctca gacctttaat gcataaatat
4081 acagacttac aacttttggg ttgtaatacc ataatggaaa tttatcattc attttagaaa
4141 atactatact tc

```

```

//
LOCUS      JAQZAU010000135                7050 bp    dna        linear    ENV 17-MAR-2023
DEFINITION MAG: Wolbachia pipientis isolate wEsol contig_60792, whole genome
            shotgun sequence.
ACCESSION  JAQZAU010000135 JAQZAU010000000
VERSION    JAQZAU010000135.1
DBLINK     BioProject: PRJNA929258
            BioSample: SAMN33142973
KEYWORDS   WGS; ENV; Metagenome Assembled Genome; MAG.
SOURCE     Wolbachia pipientis (insect metagenome)
  ORGANISM Wolbachia pipientis
            Bacteria; Pseudomonadota; Alphaproteobacteria; Rickettsiales;
            Anaplasmataceae; Wolbachieae; Wolbachia.
REFERENCE  1 (bases 1 to 7050)
  AUTHORS  Fiutek,N., Couger,B.M., Roy,S., de la Torre,J.R. and Connor,E.F.
  TITLE    Genomic assessment of the contribution of the Wolbachia
            endosymbiont of Eurosta solidaginis to gall-induction
  JOURNAL  International Journal Molecular Sciences
REFERENCE  2 (bases 1 to 7050)
  AUTHORS  Fiutek,N., Couger,B.M., Roy,S., de la Torre,J.R. and Connor,E.F.
  TITLE    Direct Submission
  JOURNAL  Submitted (10-FEB-2023) Biology, San Francisco State University,
            1600 Holloway Ave, San Francisco, CA 94132, USA
COMMENT    ##Genome-Assembly-Data-START##
            Assembly Date      :: JUN-2019
            Assembly Method    :: FLYE v. 06-2019
            Genome Representation :: Full
            Expected Final Version :: Yes
            Genome Coverage    :: 100.0x
            Sequencing Technology :: Illumina HiSeq; PacBio Sequel
            ##Genome-Assembly-Data-END##
FEATURES   Location/Qualifiers
  source    1..7050
            /organism="Wolbachia pipientis"
            /mol_type="genomic DNA"
            /submitter_seqid="contig_60792"
            /isolate="wEsol"
            /isolation_source="galls on Solidago altissima"
            /host="Eurosta solidaginis MN-2018-EFC"
            /db_xref="taxon:955"

```

```

/ environmental_sample
/ country="USA: Cowling Arboretum, Carleton College,
Northfield, MN"
/ lat_lon="44.48 N 93.13 W"
/ altitude="280 m"
/ collection_date="2018-11"
/ metagenome_source="insect metagenome"
/ note="metagenomic"
gene complement(<1..1703)
/ locus_tag="wEsol_01582"
CDS complement(<1..1703)
/ locus_tag="wEsol_01582"
/ codon_start=1
/ transl_table=11
/ product="hypothetical protein"
/ translation="MTSLDFVKELVNAFVNSNYGSKVNTNFVVEGDNIVVKFNCGRRS
AKRYLSQMARDLVREYYSDEFVACHVFDLESFPFHFDKKWLKYDKKTRITKLTVPIDS
RVIFNLKVHFAEEFENDVEDRVIKKIDKHHLGKKRIEETLNASIKQAKMDPSSSYIK
CLLFNGPNLQTYFVMALQAQMEEHGCSYSDFYHIDGNKVYVKDVENIGFIRNITEASK
KEVGYNFYLQHSNLIKVKAKHYKDAIGELIFRLTEISIHRYYYDEFIDKDKISNGDRF
AFIPTIKEGNISRYLNRGEANKINAQFGYDLLTDIKQTETTRSGRFGGVYAFSNRQI
ALLIPVIIENSVINKDGQIEIDPGLPRTLAEASPTQEFPKRSCGEGLEKHPRQGSER
EKETEPFRGVLGEEIGQASTSSQQTDMPSSSYAYIDKRDESMPEDSYFLPSTLTSPFR
VITPPVHYTISTKPILLTTKNDQKSSSLEFSARSPLKDVNILGMKSEEHDKSEQGAC
SQVGVRALQGDQADDESMLIKIQGQQVSYRPSLTPTPTAWNDSMSLNSVASNEEPEKQ
Q"
/ besthit="qcoverage 69.3121693121693 , hcoverage
95.6204379562044 , similarity 100 , identity 100 , evaluate
3.38e-282 , alnlength 393 , Bacteria , Proteobacteria ,
WP_015589230.1 hypothetical protein [Wolbachia
endosymbiont of Drosophila simulans]"
gene complement(1725..1952)
/ locus_tag="wEsol_01583"
CDS complement(1725..1952)
/ locus_tag="wEsol_01583"
/ codon_start=1
/ transl_table=11
/ fullproduct="qcoverage 100 , hcoverage 100 , similarity
100 , identity 100 , evaluate 2.10e-46 , alnlength 75 ,
Bacteria , Proteobacteria , WP_015589227.1 MULTISPECIES:
hypothetical protein [unclassified Wolbachia]"
/ translation="MDKKQQASSSSQGDPRFKVSGGYDSAAWLKANPREGGGPDHME
GRSRFDDCGKYPYTRMSGTKADKAGSKNKEK"
/ product="hypothetical protein"
/ besthit="qcoverage 100 , hcoverage 100 , similarity 100
, identity 100 , evaluate 2.10e-46 , alnlength 75 ,
Bacteria , Proteobacteria , WP_015589227.1 MULTISPECIES:
hypothetical protein [unclassified Wolbachia]"
gene complement(2046..3143)
/ locus_tag="wEsol_01584"
CDS complement(2046..3143)
/ locus_tag="wEsol_01584"
/ codon_start=1
/ transl_table=11
/ pfam="TAFH SHOCT"
/ fullproduct="qcoverage 100 , hcoverage 100 , similarity
99.5 , identity 98.9 , evaluate 1.16e-228 , alnlength 365 ,
Bacteria , Proteobacteria , WP_141457213.1 hypothetical
protein [Wolbachia endosymbiont of Carposina sasakii]"
/ translation="MLRRLECERQASSCIDEISSQAEHLIGQGDDDEDYFTGEKGRVLG

```

DFWNFFESLFTLFEVDVDDPKIYQMLKEKKEKNLIAAIMKFLRDKLKELIKIFARDL  
 SFNQRLDKEIKELQEKLGSGELSEEEFARALERLTALQDLKLRLQMAVVGWIVTMFAE  
 MFGVELAATVEASTEKEDKKAECTSLKEENKEVCENVEMKVDEREKPKVPVFLFEISP  
 GFVRPVVLSKPELEIVSDPLKHLRLTELERKSHENSQKQKVDKEEKKAKPEEQKEV  
 CPQKPAEKGPIFVEKTGRSSEKSEKKS MNISGQTPTVGSIGGQKSSNTGKETIDIDKI  
 CGELLAEQDQISPESELNSINVQPKGKYK GK"  
 /product="hypothetical protein"  
 /besthit="qcoverage 100 , hcoverage 100 , similarity 99.5  
 , identity 98.9 , evalue 1.16e-228 , alnlength 365 ,  
 Bacteria , Proteobacteria , WP\_141457213.1 hypothetical  
 protein [Wolbachia endosymbiont of Carposina sasakii]"  
 gene 3690..4979  
 /locus\_tag="wEsol\_01585"  
 CDS 3690..4979  
 /locus\_tag="wEsol\_01585"  
 /codon\_start=1  
 /transl\_table=11  
 /pfam="Pfam-B\_7043 TAFH SHOCT"  
 /fullproduct="qcoverage 100 , hcoverage 100 , similarity  
 98.6 , identity 97.9 , evalue 1.63e-265 , alnlength 429 ,  
 Bacteria , Proteobacteria , WP\_141457215.1 hypothetical  
 protein [Wolbachia endosymbiont of Carposina sasakii]"  
 /translation="MVESFSGNNKGSNFIEEAKIMENFSDNNGNGSSIFQGKIREQDF  
 SAEQKLNELKAPIEELTRQDLLRRLEECERQASSCIDEISSQAELHIGQDDEDYFTGE  
 KGRVLGDFWNFFESLFTLFEVDVDDPKIYQMLKEKKEKNLIAAIMKFLRDKLKELIK  
 IFARDLSFNQRLDKEIKELQEKLGSGELSEEEFARALERLTALQDLKLRLQMAVVGWI  
 VTMFAEMFGVELAATVEASTEKEDKKAECTSLKEENKEVCENVEMKVDEREKPKVPV  
 LFEISP GFVRPVVLSKPELEIVSDPLKHLRLTELERKSHENSQKQKVDKEEKKAKPE  
 EQKKEVCPQKPAEKGPIFVEKTGRSSEKSEKKS MNISGQTPTVGSIGGQKSSNTGKET  
 IDIDKICGELLAEQDQISPESELNSINVQPKGKYK GK"  
 /product="hypothetical protein"  
 /besthit="qcoverage 100 , hcoverage 100 , similarity 98.6  
 , identity 97.9 , evalue 1.63e-265 , alnlength 429 ,  
 Bacteria , Proteobacteria , WP\_141457215.1 hypothetical  
 protein [Wolbachia endosymbiont of Carposina sasakii]"  
 gene 5073..5300  
 /locus\_tag="wEsol\_01586"  
 CDS 5073..5300  
 /locus\_tag="wEsol\_01586"  
 /codon\_start=1  
 /transl\_table=11  
 /fullproduct="qcoverage 100 , hcoverage 100 , similarity  
 100 , identity 100 , evalue 2.10e-46 , alnlength 75 ,  
 Bacteria , Proteobacteria , WP\_015589227.1 MULTISPECIES:  
 hypothetical protein [unclassified Wolbachia]"  
 /translation="MDKKQQASSSSQGDPRFKVGS GGYSAAWLKANPREGGGPDMHE  
 GRSRFDDCGKYPYTRMSGTKADKAGSKNKEK"  
 /product="hypothetical protein"  
 /besthit="qcoverage 100 , hcoverage 100 , similarity 100  
 , identity 100 , evalue 2.10e-46 , alnlength 75 ,  
 Bacteria , Proteobacteria , WP\_015589227.1 MULTISPECIES:  
 hypothetical protein [unclassified Wolbachia]"  
 gene 5322..>7050  
 /locus\_tag="wEsol\_01587"  
 CDS 5322..>7050  
 /locus\_tag="wEsol\_01587"  
 /codon\_start=1  
 /transl\_table=11  
 /fullproduct="qcoverage 102.951388888889 , hcoverage  
 88.2440476190476 , similarity 96.3 , identity 96.3 ,

evaluate 0.0 , alnlength 593 , Bacteria , Proteobacteria ,  
 WP\_015589226.1 hypothetical protein [Wolbachia  
 endosymbiont of Drosophila simulans]"  
 /translation="MTSLDFVKELVNAFNVSNYGSKVNTNFVVEGDNIVVKFNCGRRS  
 AKRYLSQMARDLVREYYSDEFVACHVFDLESFPFHFDKKWLKYDKKTRITKLTVPIDS  
 RVIFNLKVHFAEEFENDVEDRVIKKIDEKHHLGKKRIEETLNASIKQAKMDPSSSYIK  
 CLLFNGPNLQTYFVMALQAQMEEHGCSYSDFYHIDGNKVYVKDVENIGFIRNITEASK  
 KEVGYNFYLQHSNLIKVKAKHYKDAIGELIFRLTEISIHRYYYDEFIDKDKISNGDRF  
 AFIPTIKEGNISRYLNRGEANKINAQFGYDLLTDIKGQTETTRSGRFGGVYAFSNRQI  
 ALLIPVIIENSVINKDGGQIEIDPGLPRTLAEASPTQEFPKRSCGEGLEKHPRQGSER  
 EGGKGGFLFQLVPGKIDSSQSTGDSQSLGAGEGTLTEANIQDQKRSSSIPSFRAWDS  
 STFLNSEDSLKDTENICNEEPEKQQVTDES DRKSSDEYSEAKSQDSKSPKKHGGGVQK  
 IKKFFFFSHFKKQHDVNLKRHDEGRDSVCSISSSVSAPGGSVSKKPPISKRLSLPNRVR  
 AENNSLSKET"  
 /product="hypothetical protein"  
 /besthit="qcoverage 102.951388888889 , hcoverage  
 88.2440476190476 , similarity 96.3 , identity 96.3 ,  
 evaluate 0.0 , alnlength 593 , Bacteria , Proteobacteria ,  
 WP\_015589226.1 hypothetical protein [Wolbachia  
 endosymbiont of Drosophila simulans]"

# ORIGIN

|      |             |             |            |             |             |            |
|------|-------------|-------------|------------|-------------|-------------|------------|
| 1    | acttgctggt  | tttcagggttc | ctcattagaa | gccacagaat  | ttaaggacat  | tgaatcattc |
| 61   | catgctgtag  | gaaaaggagt  | caatgatggc | ctatagctca  | cttgctgacc  | ctgaatcttt |
| 121  | attagcatac  | tttcatcatc  | tgcctgatca | ccttccaatg  | ctctcacacc  | cacctgtgag |
| 181  | caagcccctt  | gctcgctttt  | atcatgttct | tcagatttca  | tacccaaaat  | gttcacatct |
| 241  | ttcaaacatg  | gagaacgtgc  | agaaaactca | agacttgagg  | acttttgatc  | attctttgtc |
| 301  | gtaagtagaa  | ttggtttcgt  | cgatattgtg | taatgaactg  | gaggagttaa  | aacacgtgga |
| 361  | aaagaagtta  | acgttgatgg  | caaaaagtac | gaatcctctg  | gcatactttc  | atctcgttta |
| 421  | tctatgtacg  | cgtatgaact  | ggatggcatg | tccgtttgct  | gagaagaagt  | actagcctga |
| 481  | cctatctctt  | cccccagcac  | cccccgaaaa | ggctctggtt  | ctttctctct  | ttctgatcct |
| 541  | tgtctgggat  | gcttctctaa  | cccttcacca | caacttcgct  | tgggaaactc  | ctgtgtcggg |
| 601  | gatgcttcag  | ctaatagcgt  | tcgaggaagc | ccaggatcaa  | tctctatttg  | accatcttta |
| 661  | ttgattacag  | agttttctat  | aattacagga | attaaaagag  | caatctgtct  | attggaaaaa |
| 721  | gcatatacac  | caccaaattc  | acctgatcgt | gtggttttcag | tttgaccttt  | aatatcagtc |
| 781  | aaaagatcat  | aaccaaattg  | agcattaatc | ttatttgcct  | caccacgatt  | taggtacctt |
| 841  | gaaatattac  | cctctttgat  | tgtaggtata | aaagcaaagc  | gatctccatt  | acttatcttg |
| 901  | tctttatcga  | taaactcatc  | atagtaatac | ctgtggattg  | atattttcagt | taagcgaaag |
| 961  | attagctcgc  | ctatagcatc  | cttgtagtgt | ttagctttca  | cttttaaatt  | atcactgtgc |
| 1021 | tgaaggtaaa  | aattataccc  | cacctctttt | ttagaagctt  | ctgttatatt  | tctaataaaa |
| 1081 | ccaatatttt  | caacatcttt  | aacatatacc | ttattgccat  | caatatgata  | gaaatctgaa |
| 1141 | taactacaac  | catgctcctc  | catttgtgct | tgaagtgcc   | tcacaaaata  | cgtttgcaga |
| 1201 | tttggggccat | taaacaacag  | acattttata | taactagatg  | acggatccat  | ttttgcctgc |
| 1261 | tttataacttg | cgtttaaaagt | ctcttcaatg | cgtttttttac | caagatgatg  | tttttcatca |
| 1321 | attttcttaa  | tcactcggtc  | ttcgacatca | ttttcaaatt  | cctcagcaaa  | gtgcaccttg |
| 1381 | agattaaaaa  | ttactctaga  | gtctatagga | actgtgagct  | tagttattct  | tgttttcttg |
| 1441 | tcatacttta  | accatttctt  | atcaaagtga | aatggaaaag  | attcaagatc  | aaaaacgtga |
| 1501 | caagctacaa  | actcatcaga  | ataatattct | cttactaagt  | ctcttgccat  | ctgtgataag |
| 1561 | tacctctttg  | cagagcgccg  | accacaatta | aacttaacga  | cgatattatc  | gccctccaca |
| 1621 | acaaaattag  | tgttgacttt  | agagccgtaa | ttactaacgt  | taaatgcatt  | aaccagctcc |
| 1681 | ttaacaaaat  | ctaaactagt  | cataactcct | cccctatcaa  | aatattactt  | ttctttatct |
| 1741 | ttactcccag  | ccttatcagc  | tttagtacca | ctcatcctcg  | tataaggata  | cttaccacaa |
| 1801 | tcatcaaacc  | tactacgacc  | ctcgtgcatg | tctggtccac  | caccttctct  | aggattagct |
| 1861 | tttagccagg  | cagcagaatc  | ataccaccca | gagcctacct  | taaaacgagg  | atctccttgt |
| 1921 | gaactagagc  | tcgcttggtg  | ttttttatcc | ataataacct  | ccgttaataa  | aaatattatg |
| 1981 | taatctatat  | attataaata  | aatcataagt | gcaacaactt  | ttttgcattt  | tcataaattt |
| 2041 | ttttttcatt  | tccctttata  | acctccttta | ggctgaacat  | ttatagaatt  | aagtcttgat |
| 2101 | tctgggtgaa  | tttgatcctg  | ctcagcaagt | aattcaccgc  | aaattttatc  | tatatcaatt |
| 2161 | gtttctttgc  | cagtattact  | actcttttgt | ccaccaattg  | accctactgt  | tgggtgctgc |
| 2221 | ccgctaatat  | tcatgctttt  | cttttctgat | ttttcactag  | accgccctgt  | cttttcaaca |
| 2281 | aatattggcc  | ccttctccgc  | aggtttctgt | ggacacacct  | ctttcttctg  | ttcctccggc |

|      |             |             |             |             |             |             |
|------|-------------|-------------|-------------|-------------|-------------|-------------|
| 2341 | ttcgcgttttt | tctctttcttt | gtccacttttt | tgttttttgtg | aatttttcatg | agatttttctt |
| 2401 | tcaagctcag  | taagacgcaa  | tagatgtttc  | aaaggatctg  | acacaatttc  | aagttctggg  |
| 2461 | ttgctcagaa  | caaccggcct  | tacaaatcct  | ggtgaaattt  | caaaaaggaa  | aactggcact  |
| 2521 | ttaggttttt  | ctctttcatc  | cacttttcatt | tctacgtttt  | cgcaaacttc  | tttattttct  |
| 2581 | tcctttaaatg | atgtttttttc | tgcttttttta | tcttcttttt  | ctgtagatgc  | ctctaccgta  |
| 2641 | gccgccaaact | caactccaaa  | catctctgcg  | aacattgtaa  | caatccatcc  | gacaacagcc  |
| 2701 | atgtgtaacc  | tgagtttcag  | atcttgcaat  | gcagttaatc  | tttctaacgc  | ccttgcaaac  |
| 2761 | tcttcttctg  | ataactcacc  | actgcctaata | ttctcctgca  | attcttttat  | ctctttgtcc  |
| 2821 | aacctctgat  | tgaaacttaa  | atcgctgca   | aaaatcttct  | tgattaactc  | cttaagctta  |
| 2881 | tcacgcaaaa  | acttcattat  | cgcagcaatc  | aggttttttt  | ctttcttctc  | ccttgagcatt |
| 2941 | tggtagattt  | tcggatcatc  | tacatctact  | tcaaaaagg   | taaagagaga  | ttcaaagaaa  |
| 3001 | ttccagaaat  | ctccgagtac  | tcttcctttt  | tcaccagtga  | agtaatcctc  | atcatcacct  |
| 3061 | tgcccgatat  | gtagctctgc  | ttgagatgat  | atctcatcga  | tacaactaga  | agcctgacgc  |
| 3121 | tcacactcga  | gcctcctgag  | caaatcttgt  | ctggtgagct  | cctctacgca  | ctgcctctat  |
| 3181 | tgtctgatat  | agctaaagt   | acttacgata  | atgtgaaaa   | caaaaattcg  | tcattccgct  |
| 3241 | acttgtttagc | ggaatctata  | ccgcgaatga  | atcgcggtat  | gacgtaggac  | tgctgtcatc  |
| 3301 | ccagtgcgtg  | acactgggat  | ctcgttcctt  | aactttatag  | tgtaaattat  | ttcaaattgt  |
| 3361 | gtctagctgc  | aagtataata  | atctccattt  | atagataaag  | tatgttgcaa  | atgttatgcc  |
| 3421 | aaagagtata  | ataaaatcta  | tatcaaatac  | tttacaagaa  | aaagtgggat  | agaggcaaaa  |
| 3481 | gcaaatatta  | ataaggataa  | tttaagaaaa  | gtgcatgcta  | gagtttgaag  | aagcagtaaa  |
| 3541 | aataaaaaaat | attattgaaa  | ggttaaatag  | cacatgatat  | aatatatata  | tatatagtgt  |
| 3601 | aaaaatgtaa  | ataattttat  | tgacatcttt  | acattaatag  | ttcttaaata  | tttagtactg  |
| 3661 | tagaattaag  | ttttatgaag  | gaagtaaaaa  | tggtggaaa   | cttttcagg   | aacaacaaag  |
| 3721 | gcagtaattt  | tattgaagag  | gcaaaaataa  | tggaataatt  | ttcagataat  | aacggaaacg  |
| 3781 | gtagctcgat  | cttccaagga  | aaaatcaggg  | agcaagattt  | ctctgcagag  | cagaagctaa  |
| 3841 | atgaactaaa  | agcaccata   | gaggagctca  | ccagacaaga  | tttgctcagg  | aggctcgagt  |
| 3901 | gtgagcgtca  | ggcttctagt  | tgtatcgatg  | aaatatcatc  | tcaagcagag  | ctacatatcg  |
| 3961 | ggcaagggtga | tgatgaggat  | tacttcactg  | gtgaaaaagg  | aagagtactc  | ggagatttct  |
| 4021 | ggaatttctt  | tgaatctctc  | tttacccttt  | ttgaagtaga  | tgtagatgat  | ccgaaaatct  |
| 4081 | accaaagtct  | caaggagaag  | aaagaaaaaa  | acctgattgc  | tgcgataatg  | aagtttttgc  |
| 4141 | gtgataagct  | taaggagtta  | atcaagaaga  | tttttgcacg  | cgattttaagt | ttcaatcaga  |
| 4201 | ggttgacaa   | agagataaaa  | gaattgcagg  | agaaattagg  | cagtgggtgag | ttatcagaag  |
| 4261 | aagagtttgc  | aagggcggtta | gaaagattaa  | ctgcattgca  | agatctgaaa  | ctcaggttac  |
| 4321 | aaatggctgt  | tgctcgatgg  | attgtttacaa | tgttcgcaga  | gatgttttgg  | ggtgagttgg  |
| 4381 | cggctacggt  | agaggcatct  | acagaaaaag  | aagataaaaa  | agcagaaaaa  | acatcattaa  |
| 4441 | aggaagaaaa  | taaagaagtt  | tgcgaaaacg  | tagaaatgaa  | agtggatgaa  | agagaaaaac  |
| 4501 | ctaaagtgcc  | agttttcctt  | tttgaaattt  | caccaggatt  | tgtaaggccg  | ggtgttctga  |
| 4561 | gcaaaccaga  | acttgaaatt  | gtgtcagatc  | ctttgaaaca  | tctattgcgt  | cttactgagc  |
| 4621 | ttgaaagaaa  | atctcatgaa  | aattcacaaa  | aacaaaaagt  | ggacaaagaa  | gagaaaaaag  |
| 4681 | cgaagccgga  | ggaacagaag  | aaagaggtgt  | gtccacagaa  | acctgcggag  | aaggggccaa  |
| 4741 | tatttgttga  | aaagacaggg  | cggctctagt  | aaaaatcaga  | aaagaaaagc  | atgaatatta  |
| 4801 | gcgggcagac  | accaacagta  | gggtcaattg  | gtggacaaaa  | gagtagtaat  | actggcaaag  |
| 4861 | aaacaattga  | tatagataaa  | atgtgcggtg  | aattacttgc  | tgagcaggat  | caaatctcac  |
| 4921 | cagaatcaga  | acttaattct  | ataaatgttc  | agcctaaagg  | aggttataaa  | gggaaatgaa  |
| 4981 | aaaaaaattt  | atgaaaatgc  | aaaaaagttg  | ttgcacttat  | gattttattta | taatatatag  |
| 5041 | attacataat  | atttttatta  | acggagggta  | ttatggataa  | aaaacaacaa  | gcgagctcta  |
| 5101 | gttcacaagg  | agatcctcgt  | tttaaggtag  | gctctggtgg  | gtatgattct  | gctgcctggc  |
| 5161 | taaaagctaa  | tcctagagaa  | ggtggtggac  | cagacatgca  | cgagggctcg  | agtaggtttg  |
| 5221 | atgattgtgg  | taagtatcct  | tatacgagga  | tgagtgttac  | taaagctgat  | aaggctggga  |
| 5281 | gtaaaaataa  | agaaaagtaa  | tatttttgata | ggggaggagt  | tatgactagt  | ttagattttg  |
| 5341 | ttaaggagct  | ggttaatgca  | tttaacgtta  | gtaattacgg  | ctctaaagtc  | aacactaatt  |
| 5401 | ttgttgtgga  | gggcgataat  | atcgctggtta | agtttaattg  | tggtcggcgc  | tctgcaaaga  |
| 5461 | ggtacttatc  | acagatggca  | agagacttag  | taagagaata  | ttattctgat  | gagttttag   |
| 5521 | cttgtcacgt  | ttttgatctt  | gaatcttttc  | catttcactt  | tgataagaaa  | tggttaaagt  |
| 5581 | atgacaagaa  | aacaagaata  | actaagctca  | cagttcctat  | agactctaga  | gtaattttta  |
| 5641 | atctcaaggt  | gcactttgct  | gaggaatttg  | aaaatgatgt  | cgaagaccga  | gtgattaaga  |
| 5701 | aaattgatga  | aaaacatcat  | cttggtaaaa  | aacgcattga  | agagacttta  | aacgcaagta  |
| 5761 | taaagcaggc  | aaaaatggat  | ccgtcatcta  | gttatataaa  | atgtctgttg  | tttaatggcc  |
| 5821 | caaatctgca  | aacgtatttt  | gtgatggcac  | ttcaagcaca  | aatggaggag  | catggttgta  |
| 5881 | gttattcaga  | tttctatcat  | attgatggca  | ataaggtata  | tgtaaagat   | gttgaaaata  |



```

/country="USA: Cowling Arboretum, Carleton College,
Northfield, MN"
/lat_lon="44.48 N 93.13 W"
/altitude="280 m"
/collection_date="2018-11"
/metagenome_source="insect metagenome"
/note="metagenomic"
gene complement(77..>2305)
/locus_tag="wEsol_01588"
CDS complement(77..>2305)
/locus_tag="wEsol_01588"
/codon_start=1
/transl_table=11
/product="hypothetical protein"
/pfam="Pfam-B_2381 Pfam-B_13184 AAA_16 Arch_ATPase AAA_22
NB-ARC AAA_14 Ank_2 Ank_4 Pfam-B_1873 Ank_5 Ank Ank_3
Ank_2 Ank_3 Ank Ank_5 Ank_4 Ank Ank_3 Ank_5 Ank_2
Pfam-B_10896 Ank Ank_3 Ank_2 Ank_4 Ank_5 Ank_3 Ank Ank_4
Ank_2 Ank_5 Pfam-B_10896 Ank Ank_3 Ank_4 Ank Ank_3 Ank_2
Ank_4 Ank_5 Pfam-B_14646 Pfam-B_10896 Ank Ank_3
Pfam-B_1714 Ank_4 Ank_5 Ank Ank_3"
/translation="WFDVRGPVRLFTGRDEDLGMLHDSLQRNPKGAVISYITSISGPG
GMGKSQ LARKYACKYRRYYDDNVIWIDAENFEAMKDSFLRLARNRLGISPKDKYGNDK
TIETIVREVYAFFARRRSLFIFDNVQEYKKISKFLPFSLSPLNKPILITSHDQELE
KGIDVIKLGELEQRDAIEFVKKGFNILKKDKSQDREIENLVRRLQCFPLAIQQAISYI
EDQRIIEKFKISDYLKEYEKKAKKLLKSKIFQGIDNNYTKTTFTAWEV TMDKVR SDEQ
YGPLASEILDVLAYFAPDKIAREIFLNSVSDYKKKQLKLAIRLLVRYSMVGGEQNQSV
LNVHRLVQEVTRLKLQENRQEEKTLRKALELINSGLAKDSKIHVASIWGYASKHGRL
IDDFYKDTNLHLLVENDDYKAIKNLLAYIKKKHQDKLSEIVNAKDGC DIAPHLAAGN
GKLDIVKYLINKGASIDVRDCFYQTPLYWAAKSGELDMVKYLVNKGASVDIEDSYGWT
ALYWAVENENFYIAEYLIKEKGIDVSARYSNGKTM LHEAIRFAKLDAVRYLIGKGIDI
DIKDG YGGTPLHWAAIRGKIDMVRYFIEQGADVNAKDNDLTS LHWAVLYANLKVVR
LVEDGSDVDADKDKRGWTP LHLIAKNRLLWGDDLNEMLGTTEYFIQKGADVNAKD KDG
NTPLHLAAMNGKIDVAKVLLKHNA DVNAKNNEGR TALHYATDFNHRDLVELLLAHGAS
IL"
/besthit="qcoverage 95.0134770889488 , hcoverage
70.0099304865938 , similarity 100 , identity 100 , evaluate
0.0 , alnlength 705 , Bacteria , Proteobacteria ,
WP_051062191.1 MULTISPECIES: ankyrin repeat
domain-containing protein [unclassified Wolbachia]"

```

# ORIGIN

```

1 atttcctcta tttgttatat ctaatactta cttttggcgt ataacagcta tagtactaca
61 gccattaaag cccaagtcag aggatggatg caccatgagc taaaagtaac tccacaaggt
121 ccctatgatt gaaatcagtg gcataatgta atgctgttct tccttcatta ttttttagcgt
181 taacatcggc gtttgtgtttt agtagtactt ttgctacatc aatctttcca ttcatagcag
241 cgaggtgtag tgggtgtgttg ccgtctttat ccttagcggt aacatcagca cctttttgaa
301 tgaagtattc tggtgttccc aacatttcat tcaaatcatc ccccataat agacggttat
361 tcttggcaat caagtgcaat ggtgtccagc cacgtttgtc tttagcatca acatcactac
421 catcttcaac aagacatctt actaccttca agttcgcgta taaaactgcc cagtgtaacg
481 acgttagatc atcattatct ttagcattaa cgtcagcacc ttgctctata aaatatctta
541 ccatatcaat ctttcctctg atagcagccc aatgcaatgg agtaccgcca tatccgtctt
601 tgatatcaat atcaattcct ttaccaatta ggtacctcac cgcattccagt ttcgcaaacc
661 taatagcctc atgtaacata gttttgccat tgctgtacct agcactaaca tcaatacctt
721 tttcttttat aaggatttct gctatataaa aattttcatt ctcaacagcc cagtataacg
781 cagtccagcc ataactatct tcaatatcaa cactagcgcc tttattttaca agatatttta
841 ccatgtctaa ctctccactc ttagcagccc agtataatgg cgtttggtaa aaacagtccc
901 taacatcaat actagcacct ttattgatca ggtattttac tatgtccaat ttcccatttc
961 cagcagctaa atgcaatgga gcaatatcac acccatcttt agcattaaca atctcactaa
1021 gcttatcttg atgttttttc tttatatatg ctaataagtt tttaatcgct ttataatcat
1081 catttttcaac aagcaaatgt aaattagtat ctttgtaaaa gtcattcaatc aacctaccgt

```

```

1141 gtttacttgc atatcccaa atagatgcaa catgaatttt actatctttc gctaaatcac
1201 cactgtttat caattctaga gccttttctg gggttttctc ttcttgctgg ttctcttgta
1261 attttaatct tgttacttcc tgtactaacc tatggacatt taatacactt tgggttttgtt
1321 caccgcccac catggaatat ctcacaagta aacggatggc tagctttaac tgctttttct
1381 tataatcact taccgaattt aagaatatct ctctagcgat tttatcaggt gcaaaaataag
1441 ccaaaacatc taaaatctct gaagctaatt gtccatattg ttcatacact cttactttat
1501 ccatcgtaac ttccaagct gtaaaagttg ttttagtata gttattatca attccttgaa
1561 atatttttaga cttaagcaac ttcttagctt tcttttcata ctcttttagg taatcactaa
1621 ttttaaactt ctctattatt ctctgatctt cgatatatga tattgcttgt tgtatagcta
1681 aaggaaagca ttgcaacctt cttaccaaatt tttctatctc ccgatcttgc gatttatctt
1741 tttttagtat attaaatcct tttttaacaa actctatagc gtctctttgt tccaattctc
1801 ctagctttat aacgtctatt cccttttcca gttcctgatc atgcgaggta atcaaaatat
1861 gaggcttggt aagatcagga gataaagaaa atggcaaaaa tttacttatc tttttgtact
1921 cttgaacgtt atcgaaaatg aacaggctcc tccttcttgc gaagaaagca tatacttctc
1981 taacaatagt ttctatcggt ttgtcgtttc catacttatc tttgggagaa atacctaatc
2041 tatttctagc taaccttaag aaagaatctt tcatagcttc aaagttttca gcgtctatcc
2101 atataacatt gtcgtcataa tatcttctat atttacaagc atattttcta gctaactggc
2161 tttttcccat cccccagga ccactaatag acgttatgta tgaaattaca gcaccttggg
2221 gattgcgttg tagcgaatca tgtagcattc ccaaatactc atctcttctt gtaaatagtc
2281 tgactggacc tcttacatca aacca

```

```

//
LOCUS      JAQZAU010000137                14517 bp    dna        linear    ENV 17-MAR-2023
DEFINITION MAG: Wolbachia pipientis isolate wEsol contig_639, whole genome
            shotgun sequence.
ACCESSION  JAQZAU010000137 JAQZAU010000000
VERSION    JAQZAU010000137.1
DBLINK     BioProject: PRJNA929258
            BioSample: SAMN33142973
KEYWORDS   WGS; ENV; Metagenome Assembled Genome; MAG.
SOURCE     Wolbachia pipientis (insect metagenome)
ORGANISM   Wolbachia pipientis
            Bacteria; Pseudomonadota; Alphaproteobacteria; Rickettsiales;
            Anaplasmataceae; Wolbachieae; Wolbachia.
REFERENCE  1 (bases 1 to 14517)
AUTHORS    Fiutek,N., Couger,B.M., Roy,S., de la Torre,J.R. and Connor,E.F.
TITLE      Genomic assessment of the contribution of the Wolbachia
            endosymbiont of Eurosta solidaginis to gall-induction
JOURNAL     International Journal Molecular Sciences
REFERENCE  2 (bases 1 to 14517)
AUTHORS     Fiutek,N., Couger,B.M., Roy,S., de la Torre,J.R. and Connor,E.F.
TITLE      Direct Submission
JOURNAL     Submitted (10-FEB-2023) Biology, San Francisco State University,
            1600 Holloway Ave, San Francisco, CA 94132, USA
COMMENT     ##Genome-Assembly-Data-START##
            Assembly Date      :: JUN-2019
            Assembly Method    :: FLYE v. 06-2019
            Genome Representation :: Full
            Expected Final Version :: Yes
            Genome Coverage     :: 100.0x
            Sequencing Technology :: Illumina HiSeq; PacBio Sequel
            ##Genome-Assembly-Data-END##
FEATURES   Location/Qualifiers
            source              1..14517
                                /organism="Wolbachia pipientis"
                                /mol_type="genomic DNA"
                                /submitter_seqid="contig_639"
                                /isolate="wEsol"
                                /isolation_source="galls on Solidago altissima"
                                /host="Eurosta solidaginis MN-2018-EFC"
                                /db_xref="taxon:955"

```

```

/environmental_sample
/country="USA: Cowling Arboretum, Carleton College,
Northfield, MN"
/lat_lon="44.48 N 93.13 W"
/altitude="280 m"
/collection_date="2018-11"
/metagenome_source="insect metagenome"
/note="metagenomic"
gene      <1..78
          /locus_tag="wEsol_01589"
CDS       <1..78
          /locus_tag="wEsol_01589"
          /codon_start=1
          /transl_table=11
          /product="hypothetical protein"
          /translation="TEREGRTSEEHGQMERDRAERREES"
gene      545..688
          /locus_tag="wEsol_01590"
CDS       545..688
          /locus_tag="wEsol_01590"
          /codon_start=1
          /transl_table=11
          /product="hypothetical protein"
          /translation="MKGVTEHFKREWGIRSIGGRLFEMSPLGCRGDSRMCCLYDMGIKR
KVY"
gene      636..875
          /locus_tag="wEsol_01591"
CDS       636..875
          /locus_tag="wEsol_01591"
          /codon_start=1
          /transl_table=11
          /product="hypothetical protein"
          /translation="MTLECVCTIWVSNERCTEHFKKGVALVIGGRLFEISPLGWARGD
SEVFVRYGYQMKGVMSILKGVILSSIGGRLFEISP"
gene      1209..1355
          /locus_tag="wEsol_01592"
CDS       1209..1355
          /locus_tag="wEsol_01592"
          /codon_start=1
          /transl_table=11
          /product="hypothetical protein"
          /translation="MGLRSIGGRLFDISPLGWARCDSRMFVRYGYQTKGVTEHFKREW
ALGL"
gene      3000..3533
          /locus_tag="wEsol_01593"
CDS       3000..3533
          /locus_tag="wEsol_01593"
          /codon_start=1
          /transl_table=11
          /fullproduct="qcoverage 96.045197740113 , hcoverage
90.9090909090909 , similarity 90.0 , identity 87.1 ,
evaluate 3.68e-95 , alnlength 170 , Bacteria ,
Proteobacteria , EAL59672.1 DNA mismatch repair protein
MutL-1, partial [Wolbachia endosymbiont of Drosophila
simulans]"
          /cog="MutL COG0323 638 DNA mismatch repair enzyme
(predicted ATPase)"
          /pfam="MutL_C"
          /product="DNA mismatch repair protein MutL-1,
partial"

```

```

/translation="MEVYIYLDSEFIYVQPTVIQSKLIYSVSSAQLSIKRQKLLLPETV
EIKNQAGMEMIEIYKDKLFEMGFDIEIKSENKVIVKEIPAILGAIDVKEMLINILSRL
TEIEDTLPVEDKVNKILATIACHGSIRAGRKMRLEEMNELLRQMEKTPYSGQC�HGRP
TYIEMKLSDIEKLFERR"
/besthit="qcoverage 96.045197740113 , hcoverage
90.9090909090909 , similarity 90.0 , identity 87.1 ,
evalue 3.68e-95 , alnlength 170 , Bacteria ,
Proteobacteria , EAL59672.1 DNA mismatch repair protein
MutL-1, partial [Wolbachia endosymbiont of Drosophila
simulans]"
gene 4192..5142
/locus_tag="wEsol_01594"
CDS 4192..5142
/locus_tag="wEsol_01594"
/codon_start=1
/transl_table=11
/pfam="Ank_2 Ank_4 Ank Ank_5 Ank Ank_2 Ank_4 Ank_5 Ank_3
Ank_4 Ank"
/fullproduct="qcoverage 92.7215189873418 , hcoverage
91.8495297805643 , similarity 76.8 , identity 67.2 ,
evalue 3.18e-103 , alnlength 293 , Bacteria ,
Proteobacteria , WP_175937618.1 ankyrin repeat
domain-containing protein [Wolbachia endosymbiont of
Madathamugadia hiepei]"
/translation="MIMNKEEALKILELTDSDHVISKARKKLFDSKNSDVLKTQIEA
YKSLTDSQAEAFSDLVISGINSNELDFLKLLKTVKNDDKFNYLNTGEGTGGSIPLNFA
LRYTGYKNESRVKIIALLLEHGANPNTRDREGKSSLHYVINNSDGVSCHKVTESLLNK
GADPNAKDSQGKTLHLHYLFEDKSHDRVEIAKLLLRKGANPDLKDHYNKRVPDYAEHNS
KVGQLFGAVDRDVTLLYSGGIVIFSLFSICCALEAAVGDFRKADKIGFAIFTVSTAAV
ALYCAYCAIKTAFFSKPSPDFTEARAEFLNSQSPNPAGAA"
/product="ankyrin repeat domain-containing
protein"
/besthit="qcoverage 92.7215189873418 , hcoverage
91.8495297805643 , similarity 76.8 , identity 67.2 ,
evalue 3.18e-103 , alnlength 293 , Bacteria ,
Proteobacteria , WP_175937618.1 ankyrin repeat
domain-containing protein [Wolbachia endosymbiont of
Madathamugadia hiepei]"
gene 5441..5695
/locus_tag="wEsol_01595"
CDS 5441..5695
/locus_tag="wEsol_01595"
/codon_start=1
/transl_table=11
/product="hypothetical protein"
/pfam="Pfam-B_1424"
/translation="MILFIVIMSSLSCLYGDNAEFVEEMYSRYLQGDKSIGEDWYRIF
SSNLEVNKAETCVQHVTKVDDSVSSLANFFQILRSFFCRS"
/besthit="qcoverage 89.2857142857143 , hcoverage
8.4841628959276 , similarity 92.0 , identity 90.7 ,
evalue 9.08e-35 , alnlength 75 , Bacteria ,
Proteobacteria , WP_190321082.1 2-oxoglutarate
dehydrogenase E1 component [Wolbachia pipientis]"
gene 5843..6031
/locus_tag="wEsol_01596"
CDS 5843..6031
/locus_tag="wEsol_01596"
/codon_start=1
/transl_table=11
/product="hypothetical protein"

```

```

/tigr="TIGR00239 2oxo_dh_E1 931 oxoglutarate
dehydrogenase (succinyl-transferring), E1 component"
/translation="MWLQEKIENQTYTLSSQDKKEILRHLIESEMFEQFLHMKFPGYK
RFSIEGGESAIVAIEKNY"
/cog="SucA COG0567 906 2-oxoglutarate dehydrogenase
complex, dehydrogenase (E1) component, and related
enzymes"
/besthit="qcoverage 96.7741935483871 , hcoverage
44.1176470588235 , similarity 98.3 , identity 95.0 ,
evaluate 4.53e-31 , alnlength 60 , Eukaryota , Nematoda ,
KJH40018.1 hypothetical protein DICVIV_14069, partial
[Dictyocaulus viviparus]"
gene 6191..6766
/locus_tag="wEsol_01597"
CDS 6191..6766
/locus_tag="wEsol_01597"
/codon_start=1
/transl_table=11
/product="hypothetical protein"
/pfam="E1_dh"
/tigr="TIGR00239 2oxo_dh_E1 931 oxoglutarate
dehydrogenase (succinyl-transferring), E1 component"
/translation="MLNITLVTLTIETLASGKKIHLSLCPNPSHLEAVNPVLAGRIRA
KQNIRSVLGISIHGDAAFIQGVVAETLTLSNIEGYKVDGIVHIVINNQVGFTANPCC
ARSSFYCTDVAKSIEAPVFHVNGDNPEAVSFATSLAMEYRQKFKKDVVIDIICYRKYG
HNEGDEPNFTQPLMYKVISKHKTPGTLYEEK"
/cog="SucA COG0567 906 2-oxoglutarate dehydrogenase
complex, dehydrogenase (E1) component, and related
enzymes"
/besthit="qcoverage 94.2408376963351 , hcoverage
20.3619909502262 , similarity 100 , identity 99.4 ,
evaluate 1.55e-119 , alnlength 180 , Bacteria ,
Proteobacteria , WP_187470087.1 2-oxoglutarate
dehydrogenase E1 component [Wolbachia endosymbiont of
Drosophila sechellia]"
gene 11207..11317
/locus_tag="wEsol_01598"
CDS 11207..11317
/locus_tag="wEsol_01598"
/codon_start=1
/transl_table=11
/product="hypothetical protein"
/translation="MLCEIKYSDKPYTVTKEFVEQLKRKEAIYRETSKEG"
/besthit="qcoverage 94.4444444444444 , hcoverage
10.5919003115265 , similarity 97.1 , identity 94.1 ,
evaluate 1.37e-10 , alnlength 34 , Bacteria ,
Proteobacteria , MBV2146633.1 winged helix-turn-helix
domain-containing protein [Wolbachia endosymbiont of
Pissodes strobi]"

```

#### ORIGIN

```

1 acagagcgag aaggaaggac gagcgaagag catggacaaa tggaaagaga tagagcggaa
61 cgccgtgagg agagctagac aataaggatc gaagtgcgag acacatacaa caaggaggaa
121 cacaactccc gccgcacacc ctcctttttt acccatgtgt atcaaatgga aggtatttaa
181 gagtatttta agagagagta ggccatagtt ctatggatgg acgccattta gggatatcgc
241 cataaagggtg gaccagggct gactctagaa tggttttgta cgatatgggt atcaaatgaa
301 aggtgtacat gagtatttta aaaggagat gggcattagt tctatagggt aacgcctttt
361 cgagatatcg ccataaagggt ggaccagggg gactctagaa tatgtttgta cgatatgggt
421 atcaaatgaa agctgtaatg agtattttga aaagagtgat ccttagttcc taggtggacg
481 ccgttttcgag atatcgccat aaaggtgacc aagggtgtct ctagttgtac gatatgggaa
541 tcaaatgaaa ggtgttactg agcattttta gagggagtgg ggcattaggt ctataggtgg

```

|      |             |             |             |            |             |            |
|------|-------------|-------------|-------------|------------|-------------|------------|
| 601  | acgccttttc  | gaaatgtcgc  | cattaggggtg | caggggtgac | tctagaatgt  | gtttgtacga |
| 661  | tatgggtatc  | aaacgaaagg  | tgtactgagc  | attttaagaa | gggagtggca  | ttagtcatag |
| 721  | gtggacgcct  | tttcgagata  | tcgccattag  | ggtgggccag | gggtgactct  | gaagtgtttg |
| 781  | tacgatatgg  | gtatcaaagt  | aaaggtgtaa  | tgagtatttt | aaagggagta  | atccttagtt |
| 841  | ctataggtgg  | acgccttttc  | gagatatcgc  | cataaaggtg | gacaaggggtg | actctagaat |
| 901  | gttgtacgat  | atgggtatca  | aacgaaaggt  | gttactgagc | atttaagagg  | gagtgggcac |
| 961  | taggtctata  | ggtgggcgcc  | tttcgagata  | tcgccattag | ggtgggccag  | ggtgactcta |
| 1021 | gaatgtgttt  | gtacgatatg  | ggtatcaa    | gaaaggtgta | atgagatttt  | aaaagggagt |
| 1081 | aatcctcagt  | tctataggtg  | gacgcctttt  | cgagatatcg | ccataaaggt  | gggccaaggg |
| 1141 | ttgactctag  | aatgttttgt  | acgatatggg  | tatcaaacga | aaggtgttac  | tgagcatttt |
| 1201 | aagagggaat  | gggccttagg  | tctataggtg  | gacgcctttt | cgatatatcg  | ccattagggg |
| 1261 | gggccaggtg  | tgactctaga  | atgtttgtac  | gatatgggta | tcaaacgaaa  | ggtgttactg |
| 1321 | agcattttta  | gagggagtg   | gcattaggtc  | tataggtgga | cgctttttcg  | agatatcgcc |
| 1381 | attaggaggg  | gccaggggtg  | actctagaat  | gtttgtacga | tatgggtatc  | aacgaagggg |
| 1441 | gttactgagc  | atttaagagg  | agtggacact  | aggtctatag | gtggacgcct  | tttcgagcta |
| 1501 | tcgccattag  | ggtgggccag  | gggtgactct  | agaatgtttt | gtacgatatg  | ggtatcaa   |
| 1561 | gaaaggtgtt  | actgagcatt  | ttaagaggga  | gtgggcatta | ggtctatagg  | tgtacgcctt |
| 1621 | tcgagatatc  | gccattaggg  | tgggccaggg  | tgactctaga | atgtgtttgt  | acgatatggt |
| 1681 | atcaaattaa  | aggtattaat  | gagggttttt  | aaaagcgagt | ggcccttaga  | tgtatatgtg |
| 1741 | aaggcgttct  | cgcgatatcg  | accaaagtgt  | gacaggtgat | ccagaaatca  | tctgtggtac |
| 1801 | tgctatttat  | ttctatatgc  | ataccactaa  | cagtattcct | gccaagattc  | caagggttgt |
| 1861 | ttgattctcg  | cccttgtaga  | acttttcatt  | ttcttctact | taatatggta  | ggtgtcacac |
| 1921 | ccatttttaca | aagttttttc  | caaagttata  | tttgcgtcaa | taaaccaatc  | cagttaccat |
| 1981 | gtttcatccc  | ttttttcgta  | tttggtatag  | aattatggca | tttttttcat  | tttctgtaat |
| 2041 | ttcgatatcg  | ataaagtggg  | gcgtgggtat  | ggtcggattc | gctccatttt  | tataccagat |
| 2101 | aaagtgaagt  | cagataagta  | cgtgggctaa  | gtttagtaaa | ggatatatcg  | gattttgctc |
| 2161 | aagttattgt  | gttaacggcc  | cgagcgggaag | gacagacggt | ggactgtgta  | taaaaactcg |
| 2221 | gcgtggcttc  | caccgcattt  | cgcccathtt  | cacagagaac | agttagcgtc  | atagaatcta |
| 2281 | tggctcctac  | caaatttcaa  | aaggattggg  | aaatttttgt | tcgacttatg  | gcattaaaag |
| 2341 | tattctagac  | acactaaatg  | aaaatgggcg  | gagccacgcc | catttttgaaa | ttttctttat |
| 2401 | ttttgtattt  | gttgcatcat  | atcattactg  | gagttgaatt | tgacttaatt  | tacttatata |
| 2461 | cagtaaagat  | attaaathtt  | ttgttaaaat  | ttgaataaaa | aaattttttt  | taaaaagtgg |
| 2521 | gctgtgttct  | tcatacagatt | ttgctaattt  | tatttagcac | atatagagta  | atagtagtaa |
| 2581 | cgttcctgcc  | aaatttcatc  | atgatattct  | caacgactgc | caaattacag  | cttgcaaaac |
| 2641 | ttttaaat    | ccttcttgta  | aagtgggcgg  | tgccacgccc | attgtccaaa  | atcttactaa |
| 2701 | tttctattct  | gcgtcataac  | gtcaacccat  | ctaccaagtt | tcgtcgcttt  | atcgctcttg |
| 2761 | taatgaatta  | tcgcactttt  | tcggtttttc  | gaaattttcg | atatcgaaaa  | agtgggcgtg |
| 2821 | gttatagtcg  | atatcgttca  | ttttaaatag  | cgatctgaga | tgagtgtcta  | ggaacctaca |
| 2881 | taccaaattt  | catcaagata  | cctcaaaatt  | actcaagtta | tcgtgtgtta  | acggacggac |
| 2941 | ggacggacgg  | acgaggacat  | ggctcaatca  | aatttttttc | gatcctgatt  | atttgatata |
| 3001 | tggaagtcta  | tatctatctc  | gattccttta  | tatatgtaca | accaaccggt  | atccaatcaa |
| 3061 | aattaatata  | ctctgtgagc  | tctgctcaac  | tgagtataaa | aagacaaaaa  | ctacttcttc |
| 3121 | ctgaaacggt  | tgaaatcaaa  | aatcaagctg  | gaatggagat | gattgaaatc  | tataaagata |
| 3181 | agttattttga | aatgggtttt  | gatattgaaa  | tcaaatcaga | gaataaagt   | atagtaaaag |
| 3241 | aaatccctgc  | aattttggga  | gcaatagatg  | tgaaagagat | gctaattaac  | atattgagta |
| 3301 | gattaacgga  | aatagaagat  | acattgccag  | tagaagacaa | agtgaacaag  | atattggcta |
| 3361 | ctatcgcttg  | tcattggatca | attagagcag  | gcaggaaaat | gaggttagag  | gagatgaatg |
| 3421 | agctgctgag  | acaaatggaa  | aaaactccat  | attccgggca | atgcaaccac  | ggaagaccaa |
| 3481 | cttatataga  | aatgaaactc  | agtgatattg  | aaaaactggt | tgagcgcagg  | taatgaggtt |
| 3541 | gccataaata  | tgtaagtgtc  | ctttcctcgt  | catccaagta | gctcatagaa  | acggattaaa |
| 3601 | cgaaaaaacg  | acttgacaaa  | ctccgccagc  | tcccttataa | tgacaataag  | ggtatttatg |
| 3661 | actcaaaact  | tgtttttgac  | ctgcaggctc  | aatgacaaaa | ttcagtaaaa  | aacttagggg |
| 3721 | atttattggc  | ggattacata  | aaattatagc  | ggctgcatgt | ctttttat    | tttctacatt |
| 3781 | cagccaaatc  | gcgcttattt  | taagcgttag  | cacattatta | cagcgccact  | tacagtaata |
| 3841 | tagagtcaaa  | actcgctact  | cggggcttct  | tttgcctttt | tttcattttg  | taaatttctt |
| 3901 | aatgtttata  | gctcaaagag  | aggtgtcatt  | ccagcacttg | atgctggaat  | ccaggaattt |
| 3961 | tatcaagtat  | aaaagttatg  | ttaaaatgca  | ccatttatgg | aaaactagat  | cccagtgtct |
| 4021 | gggcactggg  | atgacatcat  | aggggcactg  | ggatgacacc | ctttcctaga  | tggagataaa |
| 4081 | ttacaatgtt  | tgtacagtta  | tgggattgcg  | cagtggatgc | agtttaacat  | aaaaagcttt |
| 4141 | gctttttgaa  | attttggtt   | atacgcaact  | tcaacactat | tagcaggggt  | aatgatcatg |

|      |             |             |             |             |             |             |
|------|-------------|-------------|-------------|-------------|-------------|-------------|
| 4201 | aataaagaag  | aagcttttaa  | aatttttgaa  | ctaacagata  | gccatgacgt  | tatctctaaa  |
| 4261 | gccagaaaga  | aattatttga  | tagtgaaaaa  | aactcagatg  | tattaaaaac  | gcagatcgag  |
| 4321 | gcatataaat  | cgcttaccga  | tagtcaagca  | gaagcttttt  | cggatcttgt  | aatatcaggt  |
| 4381 | attaacagta  | atgagctaga  | ttttctgaag  | ttgttgctga  | agacagtaaa  | aatgatgat   |
| 4441 | aaattttaact | atttgaatac  | agaaggtact  | ggtggcagta  | taccattgaa  | ctttgcatta  |
| 4501 | agatatacag  | gttataagaa  | tgagtcaaga  | gttaagatca  | tagcttttgc  | tttagagcat  |
| 4561 | ggtgctaata  | ctaatacgag  | agatcgagaa  | ggtaaatcat  | cattacacta  | tgttattaat  |
| 4621 | aatagtgatg  | gcgtttcttg  | ccacaaagtt  | actgaatcac  | ttttaataaa  | aggtgctgac  |
| 4681 | cctaatagcaa | aagatagtca  | aggtaaaaca  | ctgttgcatc  | acttattttga | agataaaagt  |
| 4741 | cacgatcgtg  | ttgaaatagc  | aaaattgctg  | ttgaggaaa   | gcgctaacc   | agacttaaaa  |
| 4801 | gatcattaca  | ataaaagacc  | agtagattat  | gctgaacaca  | acagtaaagt  | tgggcagcta  |
| 4861 | tttgggtgccg | ttgatcgtga  | tacgggtgta  | ctatactctg  | gtggtatagt  | gattttttcg  |
| 4921 | cttttttagta | tctgctgctg  | acttgaggct  | gcagttggag  | atttcagaaa  | agcagataaa  |
| 4981 | atcggggtttg | ccattttttac | agtaagtact  | gctgctgttg  | cattatattg  | cgcatactgt  |
| 5041 | gcaataaaaa  | ctgcgttttt  | ttcaaaacc   | tcaccagatt  | ttaccgaagc  | tagagcagaa  |
| 5101 | tttcttaata  | gtcaatcacc  | aaatccagca  | ggtgcagctt  | aataattata  | gctaaagtaa  |
| 5161 | tctaggttta  | ccgtcattcc  | gctacttggt  | agcggatgag  | ataccgtgaa  | taaatcacgg  |
| 5221 | tatgacgggt  | cgcgatggta  | tagtaattcg  | tcatcccgct  | acttgtttagc | gggatctatg  |
| 5281 | ctaagagata  | ccgcgaatga  | atcacgggat  | gacttagatt  | gctgataaat  | cgtcattccg  |
| 5341 | ctacttggtta | gcggatgaga  | tactgtgaat  | gaatcacggg  | atgacgtata  | gaaactaaaa  |
| 5401 | aagttctttt  | ttaaaaaact  | taagttatac  | ttataagtat  | ttgatacttt  | ttatagtgat  |
| 5461 | tatgtcgagt  | ttagctgcc   | tttatgggtga | taatgcagaa  | tttgtggaag  | aatgtatag   |
| 5521 | ccgttatctg  | cagggcgata  | aatcaatcgg  | ggaagattgg  | tatagaattt  | tttcaagcaa  |
| 5581 | tttagaagtt  | aataaagcgg  | agacctgcgt  | gcaacatgta  | actaagggtg  | atgattcagt  |
| 5641 | ttctagttta  | gcaaatttct  | ttcagatcct  | acggtcattt  | ttttgcagat  | cttaaaccgg  |
| 5701 | ttatcaccca  | atgtgaatca  | aggaatagat  | tatcagaaaa  | tattcgaatc  | tatatccggc  |
| 5761 | aagtgcgcgt  | gaaatctata  | gagatattta  | ctgcaagaac  | atcggttttg  | aatttatgca  |
| 5821 | tatctcctct  | tatgaggaga  | ggatgtggct  | gcaggaaaag  | atcgaaaatc  | aaacctatac  |
| 5881 | gctgagttca  | caagataaaa  | aggaaatact  | gaggcactta  | attgaatctg  | agatgttcga  |
| 5941 | gcaattttct  | catatgaaat  | ttcctggata  | taaacgtttt  | tctatcgaag  | gtggggaatc  |
| 6001 | agctatcgtt  | gcaattgaaa  | agaattatta  | gtgattctgc  | agcttttagt  | attgaagaaa  |
| 6061 | tagttctttg  | catggctcac  | cgcgacgac   | tcaatattct  | aaccaaagtt  | atgggcaaag  |
| 6121 | aatatgcggc  | aatgctatct  | gaatttcaag  | gcaatcttgc  | atatcccagg  | tgggtcttgag |
| 6181 | gtgtccgggt  | atgttaaata  | tcaccttggt  | tactcttctg  | atcgaaacac  | ttgccagtgg  |
| 6241 | taaaaaaata  | catttaagtt  | tatgccctaa  | tccatctcac  | cttgaagcgg  | taaatccggt  |
| 6301 | tttggctgga  | agaataagag  | caaaacagaa  | tataagatct  | gtgcttggca  | tatcaattca  |
| 6361 | tggatgatgcg | gctttcatcg  | gccaaggagt  | ggttgctgaa  | actctaacct  | taagcaatat  |
| 6421 | tgaaggttat  | aaggtagatg  | gcattgtgca  | cattgttatt  | aataaccaag  | ttggttttac  |
| 6481 | tgctaataccg | tgttgctgctg | gatcctcttt  | ttactgtact  | gatgtagcaa  | aatcaataga  |
| 6541 | agctccagtg  | tttcacgtta  | atggagataa  | cccagaagct  | gtgagttttg  | ctacaagtct  |
| 6601 | ggcgatggaa  | tataggcaga  | aatttaaaaa  | ggacgtagtg  | attgacataa  | tatgttaccg  |
| 6661 | caaatacggc  | cataatgaag  | gtgatgaacc  | gaatttctact | cagccactca  | tgtataaggt  |
| 6721 | aatatcaaag  | cataaaactc  | caggaacact  | gtatgaagag  | aagtaaggaa  | ggctaagttc  |
| 6781 | ggctgtaacc  | gaacataaca  | tactcagttg  | agagctatgg  | agacaaaata  | aggaaaatca  |
| 6841 | atctggggta  | accctggaat  | gtggttgat   | aacatgtgta  | tcaaataaaa  | ggtattaaag  |
| 6901 | agtatttttaa | gagagagtag  | gccatagttc  | tatggatgaa  | cgccatttag  | ggatatcgcc  |
| 6961 | ataaagggtg  | accagggctg  | actctagaat  | ttgtttgtac  | gatatgggta  | tcaaataaaa  |
| 7021 | ggtgttactg  | agcattttta  | gagggagtgg  | gccttaggtc  | tatcgggtgga | cgctttttcg  |
| 7081 | agatgtcccc  | attaaggtgg  | accaggggtg  | attctataat  | gtgtttgtac  | gatatgggta  |
| 7141 | tcaaataaaa  | ggtggtaaat  | agtattttta  | aagggaaatg  | gcttttagttc | tataggtgaa  |
| 7201 | cgctttttcg  | agaaatcgcc  | ataaagggtg  | accaggggtg  | actctagaat  | atgtttgtac  |
| 7261 | gatatgggta  | tcaaataaaa  | gctgttaaat  | agtattttga  | aaaggagtga  | tccttagttc  |
| 7321 | cataggtgga  | cgccgtttcg  | agatatcgcc  | ataaagggtg  | accaggggtg  | tctctagaat  |
| 7381 | gtgtttgtac  | gatatgggaa  | tcaaataaaa  | ggtgttactg  | agcattttta  | gagggagtgg  |
| 7441 | gcattaggtc  | tataggtgga  | cgctttttcg  | agatatcgcc  | attaggggtg  | gccaggggtg  |
| 7501 | actctagaat  | gtttgtacgg  | tatgggtatc  | aaacgaaagg  | tgttactgag  | cattttaaga  |
| 7561 | gggagtgggc  | atgaggtcca  | taggtggacg  | ccttttcgag  | atatcgtcat  | taggggtgggc |
| 7621 | caggggtgac  | tctagaatat  | gtttgtacga  | tatgtgcatc  | aaacgaaagg  | tgttactgag  |
| 7681 | cattttaaga  | gggagtgggc  | attaggtcta  | taggtggacg  | cccttttcgag | atatcgccat  |
| 7741 | taggggtgggc | caggggtgac  | tctagaatgt  | ttgtacgata  | tgggtatcaa  | acgaaagggtg |

|       |             |             |             |             |             |             |
|-------|-------------|-------------|-------------|-------------|-------------|-------------|
| 7801  | ttactgagca  | ttttaagagg  | gagtgggcat  | taggtctata  | ggtggacgcc  | ttttcgagat  |
| 7861  | atcgccatta  | gggtgggcca  | ggggtgactc  | tagaatgtgt  | ttgtacgata  | tgggtatcaa  |
| 7921  | atgaaaggtg  | gtaatgagta  | ttttaaaagg  | gagtaatcct  | tagttctata  | ggtggacgcc  |
| 7981  | ttttcgagat  | atcgccataa  | aggtggacca  | agggtgactc  | tagaatgttt  | gtacgatatg  |
| 8041  | ggtatcaaac  | gaaaggtggt  | actgagcatt  | ttaagaggga  | gtgggcatta  | ggtctatagg  |
| 8101  | tggacgcctt  | ttcgagatat  | cgccattagg  | gtgggccagg  | ggtgactcta  | gaatgtgttt  |
| 8161  | gtacgatatg  | ggtatcaa    | gaaaggtggt  | aatgagtatt  | ttaaaaggga  | gtaatcctta  |
| 8221  | gttctatagg  | tggacgcctt  | ttcgagatat  | cgccataaag  | gtggaccaag  | ggtgactcta  |
| 8281  | gaatgtttgt  | acgatatggg  | tatcaaacga  | aaggtgttac  | tgagcatttt  | aagagggagt  |
| 8341  | gggcattagg  | tctataggtg  | gacgcctttt  | cgagatatcg  | ccattagggg  | gggccagggg  |
| 8401  | gactctagaa  | tgtgtttgta  | cgatatgggt  | atcaaataag  | aggtggta    | gagtatttta  |
| 8461  | aaagggagta  | atccttagtt  | ctataggtgg  | acgccttttc  | gagatatcgc  | cataaagggtg |
| 8521  | ggaccaaggg  | tgactctaga  | atgtttgtac  | gatatgggta  | tcaaacgaaa  | ggtgttactg  |
| 8581  | agcattttta  | gagggagtg   | gcattaggtc  | tataggtgga  | cgccttttcg  | agatatcgcc  |
| 8641  | attaggggtg  | gccaggggtg  | actctagaat  | gtgtttgtac  | gatatgggta  | tcaaatagaa  |
| 8701  | ggtggtaatg  | agtattttta  | aagggagtaa  | tccttagttc  | tataggtgga  | cgccttttcg  |
| 8761  | agatatcgcc  | attaggggtg  | gccaggggtg  | gactctagaa  | tgtttgtacg  | atatgggtat  |
| 8821  | caaacgaaag  | gtgttactga  | gcatttttaag | agggagtggg  | cattaggtct  | ataggtggac  |
| 8881  | gccttttcga  | gatatacgcca | ttaggggtgg  | acaggggtga  | ctctagaatg  | ttgtacgat   |
| 8941  | atgggtatca  | aacgaaaggt  | gttactgagc  | attttaagag  | ggagtggaca  | ttaggtctat  |
| 9001  | aggtggacgc  | cttttcgaga  | tatcgccatt  | aggggtggcc  | aggggtgact  | ctagaatgtt  |
| 9061  | tgtacgat    | gggtatcaaa  | cgaaaggtgt  | tactgagcat  | tttaagaggg  | agtggacatt  |
| 9121  | aggtctatag  | gtggacgcct  | tttcgagata  | tcgccattag  | ggtgggccag  | ggtgactcta  |
| 9181  | gaatgtgttt  | gtacgatatg  | ggtatcaa    | gaaaggtgtt  | aatgagcatt  | ttaaaaggga  |
| 9241  | gtaatcctta  | gttctatagg  | tggacgcctt  | ttcgagatat  | cgccattagg  | gtgggccagg  |
| 9301  | ggtgactcta  | gaatgtttgt  | acgatatggg  | tatcaaacga  | aaggtgttac  | tgagcatttt  |
| 9361  | aagagggagt  | gggcattagg  | tctataggtg  | gacgcctttt  | cgagatatcg  | ccattaggat  |
| 9421  | gggccagggg  | tgactctaga  | atgtttgtac  | gatatgggta  | tcaaacgaaa  | ggtgttactg  |
| 9481  | agcattttta  | gagggagtg   | acactaggtc  | tataggtgga  | cgccttttcg  | agatatcgcc  |
| 9541  | attaggggtg  | gccaggggtg  | actctagaat  | gtttgtacga  | tatgggtatc  | aaacgaaagg  |
| 9601  | tgttactgag  | cattttaaga  | gggagtgggc  | attaggtcta  | taggtggacg  | ccttttcgag  |
| 9661  | atatcgccat  | taggggtgga  | caggggtgac  | tctgtatgtt  | tttgtacgat  | atggatatca  |
| 9721  | aattaaaggt  | attaatgagg  | gttttaaaag  | cgagtggccc  | ttagatgtat  | atgtgaaggc  |
| 9781  | gttctcgca   | tatcgacca   | aatgtggacc  | aggtgatcca  | gaaaatcatc  | tgtcgggtac  |
| 9841  | tgctaattta  | tttatatatg  | caataccact  | aacagtattc  | ctgccaagat  | tccaagggct  |
| 9901  | gttgatttcg  | ccttgtagaa  | ctttttcatt  | ttcttctact  | taatattggta | ggtgtcacac  |
| 9961  | ccatttttaca | aagttttttc  | caaagttata  | ttttgctca   | ataaaccaat  | ccagttacca  |
| 10021 | tgtttcatcc  | cttttttcgt  | atttggtata  | gaattatggc  | atttttttca  | tttttcgtaa  |
| 10081 | ttttcgatat  | cgataaaagt  | ggcgtgggta  | tggtcagatt  | tcgcccattt  | tttatacca   |
| 10141 | gataaaagtga | gttcagggtaa | gtacgtgggc  | taagtttagt  | aaagatatat  | cggttttgct  |
| 10201 | caagttattg  | tgttaacggc  | cgagcggga   | gacagacggt  | ggactgtgta  | taaaaactgg  |
| 10261 | gcgtggcttc  | caccgatatt  | gccatttttc  | acagagaaca  | gttaccgtca  | tagaatctat  |
| 10321 | gctcctacca  | aatttgagaa  | ggattggtaa  | atttttgttc  | gacttatggc  | aataaaaagta |
| 10381 | ttctagacaa  | actaaatgaa  | aatgggcgga  | gccacgcca   | ttttgaaatt  | ttcttttatt  |
| 10441 | tttgtatttt  | gttgcacat   | atcattactg  | gagttgaatt  | ttgactta    | ttacttatat  |
| 10501 | acagtaaaga  | tattaaat    | tttgttaaaa  | tttgaattta  | aaaaaaaa    | tttttaaaaa  |
| 10561 | gtgggcgtgt  | tcttcatcca  | attttgcata  | tttttattta  | gcacatatag  | agtaatagta  |
| 10621 | gtaacgttcc  | tgccaaat    | catcatgata  | tcttcaacga  | ctgccaaat   | acagcttgca  |
| 10681 | aaacttttta  | attaccttct  | tgtaaaaagt  | ggcgttgcca  | cgcccattgt  | ccaaaatcct  |
| 10741 | actaattttc  | tattctgcgt  | cataacgtca  | acccatctac  | caagtttcgt  | cgctttaacg  |
| 10801 | tcttttggca  | atgaattatc  | gcactttttt  | cggttttttcg | aaattttcga  | tatcgaaaaa  |
| 10861 | gtgggcgtgg  | ttatagtccg  | atatcgttca  | ttttaaatag  | cgatctgaga  | tgagtgtctca |
| 10921 | ggaacctaca  | taccaaatt   | catcaagata  | cctcaaaat   | tactcaagtt  | atcgtgttaa  |
| 10981 | cggacggacg  | gacggacgga  | catggctcaa  | tcaaat      | ttcgatcctg  | attattttga  |
| 11041 | tatatggaag  | tctatatcta  | tctcgattcc  | tttatatatg  | tacaaccaac  | cgttatccaa  |
| 11101 | tcaaacttaa  | tatactctgt  | gagctctgct  | caactgagta  | taaaaataca  | gtaaagagtc  |
| 11161 | tgggtgctcaa | atagatctag  | ttttcgatcg  | agaaattgga  | tgtgtaatgc  | tctgtgagat  |
| 11221 | aaaatatagt  | gataaacctt  | atacagtaac  | aaaggaattt  | gtcgaacaat  | taaaaagaaa  |
| 11281 | agaagcaatt  | tatagagaaa  | caagtaagga  | aggttaagtt  | cgggtgtaac  | cgaacattac  |
| 11341 | atactcagtt  | gagagctatg  | gtgacaacat  | aagggaaaa   | aaccatgtag  | gaaaatgaac  |

```

11401 cgagggaaac cctggaatgt gtttgtatga catgtgtatc aaatgaaagg cattaagag
11461 tattttatga gggagtgggc catagtctta taggtggacg ccatttaggg atatagccat
11521 aaaggaggat cagggttgac tctagaatgc gtttgtacgt tatgggtatc aaatgaaagg
11581 tgtaaatgag tattttaaaa gggagtaatc cttagttcca taggtggacg ccgtttcgag
11641 atatcgccac aaaggtggac caggggtgac cctagaatct gtttgtacaa tatgggcatc
11701 aaacgaatgg tgtaaatgag tattttaaaa gagagtgggc cttagttcta taggtggatg
11761 ccgtttcgaa atatcgccat aaaggtggac cagtgggtgac tctagaatgt gtttgtacga
11821 tatgggtatc aaattaaagg tattaatgag gggtttaaaa gggagtgggtg gttgttgtat
11881 aggtgggtcgc cttttcgaga tatcgccata aaggtgggcc aggggtgact ctagaatgag
11941 tttgtacgat atgggtatca aatgaaaggt gttaatgagt attttaaaag ggagtaatcc
12001 ttagttccat aggtggacgc cgtttcgaga tatcgccata aaggtggacc aggggtgacc
12061 ctagaatttc tttgtacaat atgggtatca aaagaaaggt gttaatgagt attttaaaag
12121 tgagtaatcc ttagttccat aggtggacgc cgtttcgaga tatcgccata aaggtggacc
12181 aggggtgacc ctagaatttg tttgtataat atgggcatca aacgaaaggt gttaatgagt
12241 attttaaaag ggagtggacc ttagttctat aggtggacgc cgtttcgaaa tatcgccata
12301 aaggtggacc aggggtgact ctagaatgtg tttgtacgat atggatatca aattaaaggt
12361 attaatgagg gttttaaaag ggagtgggtg ttgttgtata ggtgggtcgca ttttcgagat
12421 atcgccataa aggtggacca ggggtgaccc tagaatttgt ttgtacaata tgggcaccaa
12481 aagaaaggtg ttaatgagta ttttaaaagg gagtaatcct tagttccata ggtggacgcc
12541 gtttcgagat atcgccataa aggtggagca ggggtgaccc tagaatttgt ttgtacaata
12601 tgggtatcaa aagaaaggtg ttaatgagta ttttaaaagg gagtaatcct tagttccata
12661 agtggacgcc gtttcgagat accgccataa aggtggacca ggggtgactc tagaattcgt
12721 ttgtgcaata tgggtatcaa acgaaaggtg ttaatgagta ttttaaaagg gagggggcct
12781 tagttctata ggtgttcgcc ttttcgagat atcgccataa aggtggacca ggggtgactc
12841 tagactttgt ttgtacgata tgggtatcaa atgaaaggtg ttaatgagta tttttaaaag
12901 ggagtgggcc ttcgttctat aggtgttcgc ctttttcgac tctagacttt gtttgtacga
12961 tatgggtatc aaatggaagg tgctaatgag tattttaaaa gggagtgggc cttcgttcta
13021 taggtgttcg ccttttcgag atatcgtcac aaaggtggac caggggtaac tctagaatgt
13081 gtttgtacga tatgggtatc aaattaaagg tattaatgag agttttaaaa gggagtgggtg
13141 gtagttgtat atgtgacgcc gttttccaga tatcgaccaa aatgtggacc agggtgaccc
13201 agaatatcat ctgttgataa ccgctaattt atttatatat gtaatacctg ccacgatttt
13261 aaggggttttt tatttcgccc tgcagaactt tttcattttc ttctacttaa tatggtaggt
13321 gtcacaacaa ttttataaaag ttttttctaa agttatatatt cgcgtaataa aaccaatcca
13381 attacctcac catgtttcat cccttttttc gtatttggtg tagaattatg gcattttttt
13441 aattttttcgt aatttttcgat atcgaaaaag tgggcgtggt cattgtcgga tttcgttcat
13501 ttttcatacc aagataaaag gagttcaagt aagtacgtga actaagttca ttaaagatat
13561 gtcgattttt gctcaagtta tcggccatgc ggaaggacag acgaacgact gtgtataaaa
13621 actgggcgtg gtatcaaccg atttcgcccg ttttcacaga aaacagttaa catcataaaa
13681 tctatgccct accaaatttc aaaaggattg gttaattttt gttcgactta tggcgtaaaa
13741 agtatcctag acgaattaaa tgaaaaagg cgagaccacg cccatttgaa attttctttt
13801 atttttgtat tttgttgac catatcatta ctgggggttg atgttgacat aatttactta
13861 tatgctgtga agatattaaa ttttttggtt aaattttact ttaaaaattt ttttttaaaa
13921 gtgggcgtgg tccatctccg attttttctaa tttttattag gcgtacatat agtaatagaa
13981 gtaacgtccc tgccaaattt tatcatgata tcttcaacaa ctgacaaatt acagcttgca
14041 aaacttctaa attaccttct tttaaaagt ggcggtgcca cgcccattgt ccaaaatttt
14101 actagttttc tattctgcgt cataaattca actcatctac caagtttcgt cgctttatct
14161 gtcttttggt atgaattat gcactttttc gggttttcga aattttcgat atcgaaaaag
14221 tgggcgtgat tatagtccga tatcgttcat ttcaaatagc gatctgagat gagtgctcag
14281 gaacctacat accaaatttc atcaagata ctcaaaattt actcaagtta tcgtgttaac
14341 ggatggcgga cggacggacg gacggacgga catggctcaa tcaaattttt tttccatcct
14401 gattattttg atatatggaa gtctatatct atctcgattc ctttatatat gtacaaccaa
14461 ccgttatcca atcaaaacta atatactctg tgagctctgc tcaactgagt ataaaaa

```

//

```

LOCUS      JAQZAU010000138      4835 bp      dna      linear      ENV 17-MAR-2023
DEFINITION MAG: Wolbachia pipientis isolate wEsol contig_6581, whole genome
            shotgun sequence.
ACCESSION  JAQZAU010000138  JAQZAU010000000
VERSION    JAQZAU010000138.1
DBLINK     BioProject: PRJNA929258
            BioSample: SAMN33142973

```

KEYWORDS WGS; ENV; Metagenome Assembled Genome; MAG.  
 SOURCE Wolbachia pipientis (insect metagenome)  
 ORGANISM Wolbachia pipientis  
 Bacteria; Pseudomonadota; Alphaproteobacteria; Rickettsiales;  
 Anaplasmataceae; Wolbachieae; Wolbachia.  
 REFERENCE 1 (bases 1 to 4835)  
 AUTHORS Fiutek,N., Couger,B.M., Roy,S., de la Torre,J.R. and Connor,E.F.  
 TITLE Genomic assessment of the contribution of the Wolbachia  
 endosymbiont of Eurosta solidaginis to gall-induction  
 JOURNAL International Journal Molecular Sciences  
 REFERENCE 2 (bases 1 to 4835)  
 AUTHORS Fiutek,N., Couger,B.M., Roy,S., de la Torre,J.R. and Connor,E.F.  
 TITLE Direct Submission  
 JOURNAL Submitted (10-FEB-2023) Biology, San Francisco State University,  
 1600 Holloway Ave, San Francisco, CA 94132, USA  
 COMMENT ##Genome-Assembly-Data-START##  
 Assembly Date :: JUN-2019  
 Assembly Method :: FLYE v. 06-2019  
 Genome Representation :: Full  
 Expected Final Version :: Yes  
 Genome Coverage :: 100.0x  
 Sequencing Technology :: Illumina HiSeq; PacBio Sequel  
 ##Genome-Assembly-Data-END##  
 FEATURES Location/Qualifiers  
 source 1..4835  
 /organism="Wolbachia pipientis"  
 /mol\_type="genomic DNA"  
 /submitter\_seqid="contig\_6581"  
 /isolate="wEsol"  
 /isolation\_source="galls on Solidago altissima"  
 /host="Eurosta solidaginis MN-2018-EFC"  
 /db\_xref="taxon:955"  
 /environmental\_sample  
 /country="USA: Cowling Arboretum, Carleton College,  
 Northfield, MN"  
 /lat\_lon="44.48 N 93.13 W"  
 /altitude="280 m"  
 /collection\_date="2018-11"  
 /metagenome\_source="insect metagenome"  
 /note="metagenomic"  
 gene <1..1295  
 /locus\_tag="wEsol\_01599"  
 CDS <1..1295  
 /locus\_tag="wEsol\_01599"  
 /codon\_start=1  
 /transl\_table=11  
 /pfam="Pfam-B\_13116 DUF869 DUF3584 Pfam-B\_8278  
 Pfam-B\_3997 Pfam-B\_13344 Pfam-B\_13482 ATG16 Pfam-B\_1600  
 DUF869 Pfam-B\_13344 IncA"  
 /fullproduct="qcoverage 101.162790697674 , hcoverage  
 91.7721518987342 , similarity 85.3 , identity 84.4 ,  
 eval 3.25e-124 , alnlength 435 , Bacteria ,  
 Proteobacteria , WP\_141457181.1 hypothetical protein  
 [Wolbachia endosymbiont of Carposina sasakii]"  
 /translation="VALSLSILSILVLALSCKIISNNKKIEVEKNKF AEKEQELESVK  
 QQSESKVQELESKIALGEKAKEAVNKEVKELKDQLTREKQDLESEIAGLNKEIEQLKT  
 QQDDAQQKLDNATKELNNKGNQIRELEGKIGALNNKNKDLHDENTELSAKVQGQLEHK  
 EKMLSLEYQELRDENVRLNERVDSLMEELSQSQREIDSLKRQLDELKYEIGILALSKE  
 RITELETCLEEKRRKVGKLA VQLRKEKGKTSCLQSDLDVLEEEGRLLKELNKK AQET  
 IQLAADLEQKEKLCKKLEENNENLDKIGELKKLNEKLRDNNSELKSSEKELDDGCEE

```

LREHNSDLKRKVEHLQAVTGQEDEQSHSISSDISSEHLSELEGIGENESV NKQFPKPK
PPYISTPIRPPYKKLNDASCDSGYTSGCSTPTNSCHTF"
/product="hypothetical protein"
/besthit="qcoverage 101.162790697674 , hcoverage
91.7721518987342 , similarity 85.3 , identity 84.4 ,
evalue 3.25e-124 , alnlength 435 , Bacteria ,
Proteobacteria , WP_141457181.1 hypothetical protein
[Wolbachia endosymbiont of Carposina sasakii]"
gene 1453..2775
/locus_tag="wEsol_01600"
CDS 1453..2775
/locus_tag="wEsol_01600"
/codon_start=1
/transl_table=11
/pfam="IncA DUF827 DUF3584 IncA Reo_sigmaC Seryl_tRNA_N"
/fullproduct="qcoverage 100 , hcoverage 100 , similarity
100 , identity 100 , evaluate 9.06e-184 , alnlength 440 ,
Bacteria , Proteobacteria , WP_015588973.1 MULTISPECIES:
hypothetical protein [unclassified Wolbachia]"
/translation="MSNLLSEANAFYFVASSLATLTLTSLALIVTSNVPLPLILALA
TSLSVLVLALSYKIIISNNKKIEVERNKFAQKEQELENKITLGKEAEKAANKEVEKLKHE
LTREKQNLDKRAKLNQKVNSEVERESLLEEKKSLEKKLETAKNRTFEIDNELDKTR
KEIGKLNEQEEKLKLEISCLKKQLEERSRFIAKLKMEVDDNKHLELENKGLNDRIETS
REVQKALREKKHELSEKVEALNKEKNRFSKEVEELREEQERLHANLDKLQCKIKEVNK
EKKNLSKELKEKFEELDEANGLIKNQSFELDGIRKDCNNEVKSLRNSLLERDSQIEDF
LKEKEKQVNFAQLLIRCVTDNIEEPIRNNDGKAILDTIQILKSALQGEIARLLPDETP
SSSLEDLGYESLFVSRSTPTKLPNSLLTESYERSQFNQSESICKTQQ"
/product="hypothetical protein"
/besthit="qcoverage 100 , hcoverage 100 , similarity 100
, identity 100 , evaluate 9.06e-184 , alnlength 440 ,
Bacteria , Proteobacteria , WP_015588973.1 MULTISPECIES:
hypothetical protein [unclassified Wolbachia]"
gene 2806..3480
/locus_tag="wEsol_01601"
CDS 2806..3480
/locus_tag="wEsol_01601"
/codon_start=1
/transl_table=11
/fullproduct="qcoverage 100 , hcoverage 100 , similarity
100 , identity 100 , evaluate 4.48e-151 , alnlength 224 ,
Bacteria , Proteobacteria , WP_006280567.1 MULTISPECIES:
orotidine-5'-phosphate decarboxylase [Wolbachia]"
/cog="PyrF COG0284 240 Orotidine-5'-phosphate
decarboxylase"
/pfam="OMPdecase"
/tigr="TIGR01740 pyrF 216 orotidine 5'-phosphate
decarboxylase"
/product="
orotidine-5'-phosphate decarboxylase"
/translation="MNPIICALDTQDLNKAISLANALRGKVGVMKLGLEFFAAQGLSG
VQEVAKCNVPIFLDLKLHDIPNTVAKTVEVIKVLNIEMTLTHISGGTKMLEEALSVVQ
GTKIKLIGVTVLTSMNEDLNELGVAREAKSQVILLAKLAKKIGLHGVVCSALEAQEV
RRECGEDFKIITPGIRIDPGHDDQKRTATPKEAINGADYIVIGRPITKTTSSAELIL
KSMKEF"
/besthit="qcoverage 100 , hcoverage 100 , similarity 100
, identity 100 , evaluate 4.48e-151 , alnlength 224 ,
Bacteria , Proteobacteria , WP_006280567.1 MULTISPECIES:
orotidine-5'-phosphate decarboxylase [Wolbachia]"
gene 3530..4327
/locus_tag="wEsol_01602"

```

CDS 3530..4327  
 /locus\_tag="wEsol\_01602"  
 /codon\_start=1  
 /transl\_table=11  
 /fullproduct="qcoverage 100 , hcoverage 100 , similarity 100 , identity 100 , evaluate 2.94e-190 , alnlength 265 , Bacteria , Proteobacteria , WP\_015588974.1 MULTISPECIES: hypothetical protein [unclassified Wolbachia]"  
 /translation="MSNINRIIREVIKEFRSKLPDKEIEEYSGKLNKLHIYQCNKHII ENKKLYHYTINGKTHAMGQHGHNFKVKSLEVLRLNKPQISLEEVIDFMEKIINFGIDSC YGAFEMIFESRSGVTIDDAVNFKDSLSSKFYRFHSGGIFKVILELNPESSELEEIEKQ FSKVVDPYFLNAWSRESERAFKICRLCREGHVESMQKFDFSNFNLQDSAGALRALL QYCVDSNQKALGDSHELHREEMEGIYKFDDNYDLNLDSDHNDISIWH"  
 /product="hypothetical protein"  
 /besthit="qcoverage 100 , hcoverage 100 , similarity 100 , identity 100 , evaluate 2.94e-190 , alnlength 265 , Bacteria , Proteobacteria , WP\_015588974.1 MULTISPECIES: hypothetical protein [unclassified Wolbachia]"  
 gene complement(4520..>4835)  
 CDS /locus\_tag="wEsol\_01603"  
 complement(4520..>4835)  
 /locus\_tag="wEsol\_01603"  
 /codon\_start=1  
 /transl\_table=11  
 /fullproduct="qcoverage 93.2692307692308 , hcoverage 100 , similarity 100 , identity 100 , evaluate 9.44e-64 , alnlength 97 , Bacteria , Proteobacteria , WP\_010962608.1 MULTISPECIES: hypothetical protein [Wolbachia]"  
 /translation="NGNKVIGMASIDVSHSCTNIAIWYIVNDVIPVLDTGIQLLCNLI KNVCFSVRQLPLAHQLSYKQNFWIPVSSTGMTSSVVQFTFKNEYPPYSYVLGTEMASFF IC"  
 /product="hypothetical protein"  
 /besthit="qcoverage 93.2692307692308 , hcoverage 100 , similarity 100 , identity 100 , evaluate 9.44e-64 , alnlength 97 , Bacteria , Proteobacteria , WP\_010962608.1 MULTISPECIES: hypothetical protein [Wolbachia]"

# ORIGIN

```

1 ctgttgcttt gagtttgtct atacttttcta ttttggtgct tgcacttttca tgtaaaataa
61 ttagtaataa taagaaaata gaggttgaga aaaataaatt tgctgaaaaa gagcaagagt
121 tagaaagcgt aaaacaacaa tcagagagta aggtacaaga gttagaaagt aaaatagctc
181 tgggagaaaa agctaaagaa gctgtaaata aagaagtgaa ggaattaaaa gatcaattaa
241 ctcgagaaaa gcaagatttg gaaagcgaaa ttgcagggtt aaataaggaa atagagcagt
301 taaagacaca acaagatgat gcacagcaaa aattagataa tgctacaaaa gagttaaata
361 ataaaggtaa tcaaattccga gaattagagg gtaagatagg tgctcttaat aataagaaca
421 aagatttaca cgatgaaaat acagaattga gtgcaaaaagt acaaggctcag ttagaacata
481 aggagaagat gcttttctct gaataccaag agttacgtga tgaaaatgta agattgaatg
541 aaagagtgga ttcttttaat gaggaattat ctcaatctca aagagaaaata gattccttaa
601 aaaggcagtt agatgaatta aaatatgaag gaatttttagc tctttcatta aaagaaagaa
661 taacagaatt ggaaacatgt ttagaggaga aaaggaaaaa agtaggaaaa ttagcagtg
721 agttaagaaa agaaaaaggc aaaacttctt gtttacaaatc tgatttagat gatgtattag
781 aagaagaagg acgattgaaa aaagagttaa ataaaaaagc gcaagaaacg atccagctag
841 ctgcagattt agaacaaaaa gaaaaactat gcaagaaatt agaagaggaa aacaatgaaa
901 atcttgataa gatcggagag ttaaaaaaac ttaatgaaaa gttgcgcgat aataacagtg
961 agttgaaaag tagcgaaaaa gagttggatg acggatgcga ggaattaaga gaacataatt
1021 ctgatttgaa aagaaaagtt gaacatctgc aagcagtaac tgggcaggaa gacgagcaaa
1081 gtcattccat ttcttcagat ataagcagtg aacatttatc agaacttgaa ggaatagggtg
1141 aaaatgagtc tgттаataaaa cagttcccga aacaaaaacc accttatata tccactccaa
1201 taagaccgcc atataaaaaag ctgaatgatg cttcatgtga ttctggatat accagtggtg
1261 gttctacccc gaccaacagc tgccacacat tttgagtaca gttgtacact ggatacataa
1321 aaccttagct attttttagct agcaggctga aaaaggaaaag tttgtttagt gtgcagcact

```

```

1381 ataattcctc cacagataag agaattttta taaatatata caagactgct gaacgtgggg
1441 gggaggggag taatgagcaa tttgcttagt gaggctaatt cattttatatt tgtagctagt
1501 tccttagcta ctcttacgtt acttacatct ttagcgctta ttgtaacttc taatgtgcct
1561 ctctctctaa ttcttgcttt agctacatta tctgttttgg tgcttgcaact ttcgtataaa
1621 ataattagta ataataaaaa aatagagggt gagagaaaata aattcgctca gaaagagcaa
1681 gagttggaaa ataaaataac tctaggaaaag gaagctgaaa aagctgcaaa caaagaagtg
1741 gaaaaattaa aacatgaatt aactcgagaa aagcaaaatt tagacaagag agcaaaaaaa
1801 ttgaatcaga aagtaaattga gtcagaagtt gagagagaat ctcttcttga agaaaaaaa
1861 tcttttagaga aaaaattaga aacagcaaag aatcgtagct ttgaaataga caatgaattg
1921 gacaaaacaa gaaaggaaat aggttaagctt aatgagcagg aagagaaatt aaaacttgaa
1981 atctcatggt taaagaaaca gttggaagaa agaagtagat ttattgcaaa gctgaagatg
2041 gaagtggatg ataataaaca ttttagagcta gagaataagg ggttaaatga tagaatagaa
2101 acgtcacgtg aagtacaaaa ggcactacgt gagaaaaaac atgaacttag tgaaaaagta
2161 gaggcattga ataaggaaaa aaatagattt tctaaagaag tagaggaatt acgtgaagaa
2221 caagaaagac tgcattgcaaa cttagataag ctacaatgta aaattaaaga ggtcaacaaa
2281 gaaaagaaaa atttatctaa agaattaaaa gagaaatttg aagagttaga tgaagcaaat
2341 ggtttaatta aaaatcaatc ttttgagtta gatgggataa gaaaagattg taataatgaa
2401 gtaaaaagtt taagaaattc acttttagaa cgagacagtc aaatagaaga ttttttgaaa
2461 gagaaagaaa aacaagtga ttttgcgcaa ctggtgataa gatgcgtaac agacaatata
2521 gaagaaccaa taagaaataa tgatggaaaa gcaatattag atacgattca aatattaaag
2581 tctgcgttac aaggagaaat tgcacggctt ttgccagacg aaacgccttc ttcttcgctg
2641 gaagatcttg gatatgaatc attatttgtc agtcgctcat ccaccccgac caagttgcca
2701 aattcactat tgacagaatc ttatgaacgc agtcagttca atcagagtga aagtatttgc
2761 aaaacacaa aatgagtctt attataagat aaatcatgca agataatgaa cccaataata
2821 tgcgcactgg atacacaaga cttaaataag gctatttctc tagctaattgc tctgcgtggg
2881 aaagttggca tggtaaagct gggattagaa ttttttgctg ctcaaggtct ttctggagtg
2941 caagaagttg caaaatgcaa tgtaccaatt tttttagatc tgaaattgca tgacattcca
3001 aacactgtag ccaaacagat tgaagtaata aaagtctctga acattgaaat gttaactctg
3061 cacatcagcg gtggaacaaa aatgcttgaa gaagcgctaa gtgtagtga aggcacaaaa
3121 ataaagctga ttggggtgac agtgctaact agtatgagca atgaggattt aaacgagctt
3181 ggagtagcaa gagaggcaaa atcacaggta attttgcttg caaagcttgc aaaaagattt
3241 ggactccatg gagtagtctg ttctgcacta gaagctcaag aagtgcgccg agaattcggt
3301 gaagacttta aaattattac tccaggaatt cgtatagatc caggtcatga cgacccaaaa
3361 agaacagcaa caccaaaaaga agcaataaat tcaggagctg attatatcgt cattggcaga
3421 cccattacaa aaactacaag tagtgcgagg ctaatatgta aatccatgaa agaattttta
3481 tataataact taattttataa aaataactaac atattaatta ggaataagca tgagtaatat
3541 caatagaata atacgcgaag taatcaagga attccgctca aaattaccag ataaggaaat
3601 agaggaatat tctggcaaat tgaataagct acatatctac cagtgaata agcatataat
3661 agaaaataag aagctatatc attatacaat aaatgggaaa acccatgcta tgggtcagca
3721 tgggcataat tttgtcaaga gtttagaagt tatcttgagg aataagccac aaatttcctt
3781 agaagaggta attgatttta tggaaaaaat aattaatttt ggtattgata gttgttatgg
3841 agcatttgag atgatatttg aatctcgctc tgggtgttaca atagatgatg cagttaattt
3901 tgtaaaagat agcttatcta gtaaatttta tagattccat ggcagtgagg ttttcaaagt
3961 aatattagaa cttaatccag agagctctct tgaagagata gagaaacaat ttagcaaagt
4021 agtagatcct tactttctta atgcttgagg tgcagaaaagt gaaagggctt ttgctaagat
4081 atgtaggtta tgtagagaag gacatgtgga gagtatgcag aaatttgatt ttagcaattt
4141 taatttagat caagatagtg ctggagcatt aagagcactg ttacagtatt gtgttgacgt
4201 ttctaataca aaagcttttag gtgattcaca tgaattgcat agagaagaga tggaggggat
4261 atataaattt gatgataatt acgattttaa tttagatagt gatcataatg atagtatctg
4321 gcattgaaat tatactacaa taataaaaata actggataaa aattatcacc aaaaaaattc
4381 aaaaaagtgc ttgacataaa agaacgaaca ttatatagtg tcattatctt ttattttacc
4441 tcgcttaatt taattactgg attaaagctta cagtactaag cgtggcacia agtgccacgc
4501 tatttttcgg ttacattttt caacagataa aaaatgatgc catttcagtg ccaagcacat
4561 aactgtacgg atattcattt ttaaaggtaa attgcacaac agatgatgtc attccagtg
4621 ttgacactgg aatccagaaa ttttgcttat aactgagctg atgagctaaa ggtagttgtc
4681 ttacgctaaa acaaacgttt ttaattaagt tgcatagaag ctggatccca gtgtcaagca
4741 ctggaatgac atcgtttact atgtaccata ttgcaatatt cgtacaactg tgggaaacat
4801 ctatggatgc cattcctatt accttatttc cattt

```

//

LOCUS

JAQZAU010000139

4396 bp

dna

linear

ENV 17-MAR-2023

DEFINITION MAG: Wolbachia pipientis isolate wEsol contig\_6763, whole genome  
 shotgun sequence.  
 ACCESSION JAQZAU010000139 JAQZAU010000000  
 VERSION JAQZAU010000139.1  
 DBLINK BioProject: PRJNA929258  
 BioSample: SAMN33142973  
 KEYWORDS WGS; ENV; Metagenome Assembled Genome; MAG.  
 SOURCE Wolbachia pipientis (insect metagenome)  
 ORGANISM Wolbachia pipientis  
 Bacteria; Pseudomonadota; Alphaproteobacteria; Rickettsiales;  
 Anaplasmataceae; Wolbachieae; Wolbachia.  
 REFERENCE 1 (bases 1 to 4396)  
 AUTHORS Fiutek,N., Couger,B.M., Roy,S., de la Torre,J.R. and Connor,E.F.  
 TITLE Genomic assessment of the contribution of the Wolbachia  
 endosymbiont of Eurosta solidaginis to gall-induction  
 JOURNAL International Journal Molecular Sciences  
 REFERENCE 2 (bases 1 to 4396)  
 AUTHORS Fiutek,N., Couger,B.M., Roy,S., de la Torre,J.R. and Connor,E.F.  
 TITLE Direct Submission  
 JOURNAL Submitted (10-FEB-2023) Biology, San Francisco State University,  
 1600 Holloway Ave, San Francisco, CA 94132, USA  
 COMMENT ##Genome-Assembly-Data-START##  
 Assembly Date :: JUN-2019  
 Assembly Method :: FLYE v. 06-2019  
 Genome Representation :: Full  
 Expected Final Version :: Yes  
 Genome Coverage :: 100.0x  
 Sequencing Technology :: Illumina HiSeq; PacBio Sequel  
 ##Genome-Assembly-Data-END##  
 FEATURES Location/Qualifiers  
 source 1..4396  
 /organism="Wolbachia pipientis"  
 /mol\_type="genomic DNA"  
 /submitter\_seqid="contig\_6763"  
 /isolate="wEsol"  
 /isolation\_source="galls on Solidago altissima"  
 /host="Eurosta solidaginis MN-2018-EFC"  
 /db\_xref="taxon:955"  
 /environmental\_sample  
 /country="USA: Cowling Arboretum, Carleton College,  
 Northfield, MN"  
 /lat\_lon="44.48 N 93.13 W"  
 /altitude="280 m"  
 /collection\_date="2018-11"  
 /metagenome\_source="insect metagenome"  
 /note="metagenomic"  
 gene <1..114  
 /locus\_tag="wEsol\_01604"  
 CDS <1..114  
 /locus\_tag="wEsol\_01604"  
 /codon\_start=1  
 /transl\_table=11  
 /fullproduct="qcoverage 100 , hcoverage 90.2439024390244  
 , similarity 100 , identity 97.3 , evalue 1.22e-16 ,  
 alnlength 37 , Bacteria , Proteobacteria , KLT22407.1  
 transposase [Wolbachia endosymbiont of Armadillidium  
 vulgare str. wVulC]"  
 /cog="COG3328 COG3328 379 Transposase and inactivated  
 derivatives"  
 /pfam="Transposase\_mut"

```

        /product="transposase"
        /translation="KISAAEISSITDKLLPVINEWRSRPLQSVYPIVFMVF"
        /besthit="qcoverage 100 , hcoverage 90.2439024390244 ,
        similarity 100 , identity 97.3 , evaluate 1.22e-16 ,
        alnlength 37 , Bacteria , Proteobacteria , KLT22407.1
        transposase [Wolbachia endosymbiont of Armadillidium
        vulgare str. wVulC]"
gene      149..814
        /locus_tag="wEsol_01605"
CDS       149..814
        /locus_tag="wEsol_01605"
        /codon_start=1
        /transl_table=11
        /fullproduct="qcoverage 100 , hcoverage 100 , similarity
        100 , identity 99.5 , evaluate 3.59e-160 , alnlength 221 ,
        Eukaryota , Arthropoda , CAD7417219.1 unnamed protein
        product [Timema poppensis]"
        /cog="COG3328 COG3328 379 Transposase and inactivated
        derivatives"
        /pfam="Transposase_mut MULE DDE_Tnp_ISL3 DDE_Tnp_ISL3
        DDE_Tnp_IS240"
        /product="unnamed protein product"
        /translation="MYNILGIDQNGKKEVLGFYLAESEGSNFWLGVLNDLKERGVEDI
        LIACVDGLKSFPAAINSVFPNAEVQMCIVHQIRNSLKYVASKDAKSFLSDLKKVYQAS
        SKEIAENYLLELDEKWKTKYPMVIKSWQNNWENLSGYFKYSGPVRRIIYTTNPIEGLH
        RQIRKFTKTKGSFTSINALYKQVYCAIKKAEKWTMPVHDWALTISQLDVFFPGRLLKI
        ELN"
        /besthit="qcoverage 100 , hcoverage 100 , similarity 100
        , identity 99.5 , evaluate 3.59e-160 , alnlength 221 ,
        Eukaryota , Arthropoda , CAD7417219.1 unnamed protein
        product [Timema poppensis]"
gene      complement(755..1945)
        /locus_tag="wEsol_01606"
CDS       complement(755..1945)
        /locus_tag="wEsol_01606"
        /codon_start=1
        /transl_table=11
        /product="hypothetical protein"
        /pfam="OTU DUF968"
        /translation="MKEPNHTREPIALFRQIKEKKSSDLLHNLKNACPKNLNIGIAI
        KTGDCFFDSVAQGLNELNIKPGYRFTAKSLRKDCADYAENKKDSRWVFNEITKNIAEG
        YAVPMIGSNGNVMKDNQNNIIPDNIA SFDRYLKDIRSMATEASLPWGRPGVEGRMIC
        DKYEVELYIYSIEEDSQKVTVTKITAHDDDLVFIQDVNLDQLKIDNSKKTGVVNYM
        QHFVPLLSGISEDIKEDQQVSSEEIFSTDKRVPSPNQPEQEVQQRINTSTNATVYTD
        KEIPFSHQLEQKTRQEGINASASATVYTDREIPTSNQSEQKVQQEIIINTST SAPVLQI
        HIDKEIPSSHQQEQKTQQKEIQKKLINNYKKEGVNLKLCQTAFVLVQLNFQSARKENIK
        LRDS"
        /besthit="qcoverage 61.3636363636364 , hcoverage
        92.0454545454545 , similarity 99.6 , identity 99.2 ,
        evaluate 1.77e-167 , alnlength 243 , Bacteria ,
        Proteobacteria , MBV2146629.1 ankryin [Wolbachia
        endosymbiont of Pissodes strobi]"
gene      complement(2140..2823)
        /locus_tag="wEsol_01607"
CDS       complement(2140..2823)
        /locus_tag="wEsol_01607"
        /codon_start=1
        /transl_table=11
        /fullproduct="qcoverage 101.762114537445 , hcoverage
        88.8461538461538 , similarity 97.4 , identity 96.5 ,

```

```

evaluate 7.53e-150 , alnlength 231 , Bacteria ,
Proteobacteria , MBV2146630.1 DsbA family protein
[Wolbachia endosymbiont of Pissodes strobi]"
/cog="DsbG COG1651 244 Protein-disulfide isomerase"
/pfam="Thioredoxin_4 DSBA Thioredoxin_2"
/product="DsbA family protein"
/translation="MLSDDYIGEKLDNYISRNFDKIVKTLKEESIKSSYAARDNVTKS
KISQYKDQIFDLTYPYSGNENSSVIAVFLCGYCKTIKDDIKQLINDGKIKYIFRDVPI
LGNDSLRAAKSALAVYFIDKEKYFDFHYSALSHKGGFSDESILDIVKSIGIDEDDFNN
SMKNNADKMEQMINGSKLLVRDLGVGGTPFLIIGDSLFGATDLNVLRKKVDELSRKQ
KLASAINLL"
/besthit="qcoverage 101.762114537445 , hcoverage
88.8461538461538 , similarity 97.4 , identity 96.5 ,
evaluate 7.53e-150 , alnlength 231 , Bacteria ,
Proteobacteria , MBV2146630.1 DsbA family protein
[Wolbachia endosymbiont of Pissodes strobi]"
gene 3270..3812
/locus_tag="wEsol_01608"
CDS 3270..3812
/locus_tag="wEsol_01608"
/codon_start=1
/transl_table=11
/pfam="AAA_16 Arch_ATPase AAA_22 AAA_14 AAA"
/fullproduct="qcoverage 89.4444444444444 , hcoverage
94.7058823529412 , similarity 99.4 , identity 96.9 ,
evaluate 1.09e-109 , alnlength 161 , Bacteria ,
Proteobacteria , MBV2146632.1 ATP-binding protein
[Wolbachia endosymbiont of Pissodes strobi]"
/translation="MVEKRKIAILES KLLFSPFAEFIAVYGRRRVGKTYLIKQFFSKH
ADVLFEQTGLNNGTMQEQLAIFTQSLSNTFYKGAKMALPEVWLDALQQTLAIDNTH
NEHIVLFFDEL PWLATRKS RFLETLEYFWNIHWTNRKKLILVVC GSAASWMLENI IYT
KGGLHNRITARIPLQPFNFT"
/product="ATP-binding protein"
/besthit="qcoverage 89.4444444444444 , hcoverage
94.7058823529412 , similarity 99.4 , identity 96.9 ,
evaluate 1.09e-109 , alnlength 161 , Bacteria ,
Proteobacteria , MBV2146632.1 ATP-binding protein
[Wolbachia endosymbiont of Pissodes strobi]"
gene 3877..4254
/locus_tag="wEsol_01609"
CDS 3877..4254
/locus_tag="wEsol_01609"
/codon_start=1
/transl_table=11
/product="hypothetical protein"
/pfam="HTH_24 B-block_TFIIIC"
/translation="MAIGGIPHYLKEVSKGLSAAQNINMICFQKGGLLFDEFDMLFHS
LYEEPETYLNIIIRAI AKKPKGINRKELIKATKITEGGS LTAKLRSL EEAGF IGGFLPL
KKGKRGVYYRDNGRICIILSNVD"
/besthit="qcoverage 89.6 , hcoverage 34.8909657320872 ,
similarity 98.2 , identity 97.3 , evaluate 9.29e-68 ,
alnlength 112 , Bacteria , Proteobacteria , MBV2146633.1
winged helix-turn-helix domain-containing protein
[Wolbachia endosymbiont of Pissodes strobi]"
gene 4217..>4396
/locus_tag="wEsol_01610"
CDS 4217..>4396
/locus_tag="wEsol_01610"
/codon_start=1
/transl_table=11

```

```

/product="hypothetical protein"
/translation="MDEYVLFLYLTWIEPFKEVTKRAIISDAHYWELAIKKPAWQWTWAG
QTFEAVCFKHANVIRK"
/besthit="qcoverage 100 , hcoverage 18.6915887850467 ,
similarity 98.3 , identity 98.3 , evalue 1.06e-35 ,
alnlength 60 , Bacteria , Proteobacteria , MBV2146633.1
winged helix-turn-helix domain-containing protein
[Wolbachia endosymbiont of Pissodes strobi]"

```

# ORIGIN

```

1 aaaatatcgg cggcagagat atcaagtatt actgacaaat tgctaccagt aatcaacgaa
61 tggcgtagtc gcccgcgtgca gtctgtatat ccgatatgtt tcatggtttt ttaaagtcaa
121 agaggacggg cattgcgtaa gttaatgcat gtataacata ttaggcatag atcaaaatgg
181 caaaaaagaa gtattaggtt tttatgtggc tgaaagtgaa ggatctaact tctggttggg
241 agtgctaaat gacctcaaag aaagaggagt agaagatatc cttattgcct gcgttgatgg
301 gctgaaaagc tttcctgcag ctataaacag tgtctttcct aatgcggaag tgcagatgtg
361 tatagtgcac cagatacgca actcactgaa gtatgtggcc agtaaagatg cgaagagttt
421 tttgagcgat ttaaagaagg tatatcaagc ttcaagcaag gaaattgccg agaattatct
481 gttggaattg gatgaaaaat ggggcacaaa gtaccctatg gttataaaat cttggcagaa
541 taattgggaa aacttgtctg gttattttaa gtattctggt ccagttagga ggataatcta
601 caccaccaat cccatagagg ggctacatag gcaaattagg aaattcacta agaccaaaag
661 ctcathttacc agcataaatg ccttgatata gcaggtatat tgtgctataa agaaggcaga
721 ggaaaagtgg acgatgcctg tacatgattg ggcattaact atctctcaac ttgatgtttt
781 ctttcctggc agattgaaaa ttgagttgaa ctaaaaatgc tgtttgacac agtttattta
841 aactccctc tttcttgtaa ttattaatta attttttttg tatttctttt tgttgtgttt
901 tttgttcttg ctgatgagag gaagggattt ctttatctat gtgaatttgt aaaaccggcg
961 cactagtact ggtattaatt atttcttggt gtactttttg ctctgattga ttagaagtag
1021 gaatttctct atccgtataa acagtcgcac tagcgctggc attaattcct tcttgctcgtg
1081 ttttttgctc tagttgatga gaaaaaggga tttctttatc cgtataaaca gtcgcattag
1141 tgctggtatt aattctttct tgttgactt cttgctctgg ttgattagaa ggaggaactc
1201 ttttatctgt actaaaaatt tcttactag aaacttggtg atcttctttt atatcttcag
1261 aaattccact aaggagtggg acaaaatggt gcatgtaatt cactactcct acagtttttt
1321 tactattatc tatctttaat tgatcaagat tcacatcttg tataaaaact tctagatcat
1381 catcatgtgc tgtaatttta gttactgtaa ctttttgact atcttcctct attgaataaa
1441 tataaagctc cacttcatac ttatcacata tcattctccc ttcaaccctt gggcgacccc
1501 atataggtag gctagcttct gtagccatac ttctaataatc ttttaaatat ctatcaaaag
1561 atgcaatatt gtctggtata atattgttct ggttatcttt cattacattt ccgtttgaac
1621 ctatcatagg tacagcatat ccttcagcaa tattttttgt tatttcatta aaaaccctc
1681 gtgagtcctt tttgttttca gcataatctg cacaatcttt tcttaatgat tttgcggtaa
1741 aacgataacc aggttttata ttttaactcat tcaacccttg agccacggag tcaaaaaagc
1801 aatctcctgt ctttatagca attcctatgt ttagattttt gggacaagca ttttttaaat
1861 tatgcagtaa atcacttgat tttttctttt ctttgatttg tcgaaaaaga gcaattgggt
1921 ctcttgatg attaggctct ttcataattgt aacctcagaa tggtagctat atgttaagtt
1981 taacactttt taatggatta gtcaaccttt gcaggctaag gttatgctcg actgtaggca
2041 tcacctgctt ttcttgagct actgcgtatc ttatacgtac tgctatttat cacattcata
2101 attagattcg tttacgttgt caagtaaaga aataaaaatt tatagcaaat taatcgctga
2161 agctagtttt tgcttgcgac ttaattcatc tacttttttg cgtaatacat tcaaatcagt
2221 tgctcctaca aacagactat cccaattat taaaaaagg gtgcccccta ctcccaaactc
2281 tcttactagg agcttactgc catttatcat ttgctccatt ttgtcccgct tatttttcat
2341 ggaattatta aaatcgctct catcaatccc tatgcttttc actatatcca atatgctttc
2401 gtctgaaaat cctcctttgt gacttaaagc agaatagtga aagtcgaaat atttttcttt
2461 atcaataaag taaacagcta aagcgctttt tgctgccctt aaagagtcac taccaagtat
2521 tggaacatcc cttaaagatat acttgatttt accgctcgta attaactggt ttatatcgctc
2581 ttttatagtc ttgcaatatc cacaaagaaa cacagctata acactactat tttcatttcc
2641 ggagtaagga taagtaaggc caaatatttg atccttgat tgtgaaattt tacttttggg
2701 cacattatct cgagcagcgt aactactttt aatcgactcc tctttgagag tttttacgat
2761 cttatcaaaa tttctactta tataattatc taatttctca cctatataat catcgcttag
2821 catttagctg cgatttgaaa gccaatgtgt tattactggg aaacttgcta ctgccagtat
2881 aaggatcaat aaaaacgata ttctagacat acaatttatt taaaaaccta caacataaaa
2941 ctttagtaca catttttctg tatattaaaa gaagcatcta atattaataa atgaaaaaca
3001 tttatatcaa gtgtatttta taaccagttt tgtttcaaat gcaaacctta cgtacaatgg

```



```

/isolation_source="galls on Solidago altissima"
/host="Eurosta solidaginis MN-2018-EFC"
/db_xref="taxon:955"
/environmental_sample
/country="USA: Cowling Arboretum, Carleton College,
Northfield, MN"
/lat_lon="44.48 N 93.13 W"
/altitude="280 m"
/collection_date="2018-11"
/metagenome_source="insect metagenome"
/note="metagenomic"
gene complement(30..1202)
/locus_tag="wEsol_01611"
CDS complement(30..1202)
/locus_tag="wEsol_01611"
/codon_start=1
/transl_table=11
/fullproduct="qcoverage 100 , hcoverage 100 , similarity
100 , identity 100 , evalue 7.33e-288 , alnlength 390 ,
Bacteria;Viruses , Proteobacteria;Uroviricota ,
WP_010962676.1 MULTISPECIES: NADH-quinone oxidoreductase
subunit D [Wolbachia]"
/cog="NuoD COG0649 398 NADH:ubiquinone oxidoreductase 49
kD subunit 7"
/pfam="Complex1_49kDa"
/tigr="TIGR01962 NuoD 386 NADH dehydrogenase (quinone), D
subunit"
/product="NADH-quinone
oxidoreductase subunit D"
/translation="MPDLKTMMLNFGPQHAAHGVLRLVLEMDGEVIERADPHIGLLH
RGTEKLIHKTLYLQALPYFDRILDYVSPMSQEHAYSLCVEKLLQCEVPIRAKYLRVLC
ELTRILNHLLNVSSQALDVGAMTPLLWLFEEREKILEFYERASGARFHAAYIRPGGIA
ADVPEDLIEDIAKFIEQFPKYIDDVDELLTENRIWKQRTVGISEISIKQALDWGFGSP
MLRAAGLAWDLRKSQPYEIYDQLDFDIPIGQNGDCYDRYLVRMAEIRQSISLVKQCIE
KMPEGQIKTEDRKISPPSRAEMKKSMEALIHFKLYSEGYHVPGEAYAVVEAPKGEF
GVYIVSDGTNRPYRCRIRAPGFAHLQALDFMAKGHMLADVAIIIGSLDIVFGEIDR"
/besthit="qcoverage 100 , hcoverage 100 , similarity 100
, identity 100 , evalue 7.33e-288 , alnlength 390 ,
Bacteria;Viruses , Proteobacteria;Uroviricota ,
WP_010962676.1 MULTISPECIES: NADH-quinone oxidoreductase
subunit D [Wolbachia]"
gene 1478..2656
/locus_tag="wEsol_01612"
CDS 1478..2656
/locus_tag="wEsol_01612"
/codon_start=1
/transl_table=11
/fullproduct="qcoverage 100 , hcoverage 100 , similarity
100 , identity 100 , evalue 2.75e-284 , alnlength 392 ,
Bacteria , Proteobacteria , WP_015589068.1 MULTISPECIES:
aspartate aminotransferase family protein [unclassified
Wolbachia]"
/cog="ArgD COG4992 404 Ornithine/acetylornithine
aminotransferase"
/pfam="Aminotran_3 Cys_Met_Meta_PP Aminotran_5
Aminotran_1_2"
/tigr="TIGR00707 argD 381 transaminase,
acetylornithine/succinylornithine family"
/product="aspartate
aminotransferase family protein"

```

```

/translation="MDHVVNAYNRLDTPIVRGEGVYLFDRGGKKYLDFAAGISTTSLG
HCHPYITDKLKEQLSSLWHCSNIFTIPEQERLAERLTTLTFADKVFFCSSLGLEATEAA
IKFIRRYFYLKQAKRNRIITIEGGFHGRSIAAISAGGSEKSREGFAPLLSGFDKVPR
NDIKALEKKISDETA AVFLEPIQSEGGVYPLDVEYLQKVREITKAQGIILCFDEVQCG
YGRIGSLFHYQNVGIEPDMLTCAKAMGNGFPVAACLVKDYIAEAITPGTHGSTYGGNP
LAMTVGNAVLDIMLKEGFFDHVKRISKYLKEKLLLLAKEFPEMILEVRGEGLLMGIEL
ATLVADKIISRLDKGLIITRVLNNKVVRVTPPLIIEDEHVNAACNMLYDLFFKIKGI
"
/besthit="qcoverage 100 , hcoverage 100 , similarity 100
, identity 100 , evaluate 2.75e-284 , alnlength 392 ,
Bacteria , Proteobacteria , WP_015589068.1 MULTISPECIES:
aspartate aminotransferase family protein [unclassified
Wolbachia]"
gene 2745..4028
/locus_tag="wEsol_01613"
CDS 2745..4028
/locus_tag="wEsol_01613"
/codon_start=1
/transl_table=11
/fullproduct="qcoverage 100 , hcoverage 100 , similarity
100 , identity 100 , evaluate 9.48e-296 , alnlength 427 ,
Bacteria , Proteobacteria , WP_015589067.1 MULTISPECIES:
HlyC/CorC family transporter [unclassified Wolbachia]"
/cog="CorB COG4536 423 Putative Mg2+ and Co2+ transporter
CorB"
/pfam="DUF21 CBS CBS CorC_HlyC"
/tigr="TIGR03520 GldE 408 gliding motility-associated
protein GldE"
/product="HlyC/CorC family
transporter"
/translation="MDWLLVLVSSAIFVLLVLSFLFSGAEIGLTSISRSRVNKLKLDG
NKKARVIDRLLNRKELTIGTVLLGNTIINITCSALFTAIFINLFGNEGILLSTIIMTF
CILLFCEVLPKTYAIQNPEKFASFSAFYVLFVFKIFSPLTLGIQFIVNLILKLCGLHK
DKEVISAADAMRNMITLHRSEGTMLQQDLMLSSILDLAETEISQIMTHRRNLFSLDI
DRNKEELIREILTSSHSRVPLWQKEPDNIVGVIVKALINALREKNKAEGVDITQVM
SRPWFIPSTPLSVQLHNFRKNRKHAFVIDEY GALQGI VTLLEDILEEIVGEISDEHD
LITENFIKKISDNMYHIEGKSTIRDINRQLYWNLPDEEATTLAGMIVNEIERIPDEGE
EFSMYGFRFKILKKDKNIITVVEVQVKTGNISGSN"
/besthit="qcoverage 100 , hcoverage 100 , similarity 100
, identity 100 , evaluate 9.48e-296 , alnlength 427 ,
Bacteria , Proteobacteria , WP_015589067.1 MULTISPECIES:
HlyC/CorC family transporter [unclassified Wolbachia]"
gene 4042..4308
/locus_tag="wEsol_01614"
CDS 4042..4308
/locus_tag="wEsol_01614"
/codon_start=1
/transl_table=11
/fullproduct="qcoverage 100 , hcoverage 100 , similarity
100 , identity 100 , evaluate 3.06e-45 , alnlength 88 ,
Bacteria;Viruses , Proteobacteria;Uroviricota ,
WP_010082293.1 MULTISPECIES: DUF2312 domain-containing
protein [Wolbachia]"
/cog="COG3750 COG3750 85 Uncharacterized protein
conserved in bacteria"
/pfam="DUF2312"
/product="DUF2312
domain-containing protein"
/translation="MEDTVKITAEELKGYIERIEKLEQEKRDVQDHIRDVYAKAADEG
WDIKVMKQIIRLRKMDDDDREEQEILLDTYKRALGMSYEEELSE"

```

```

/blasthit="qcoverage 100 , hcoverage 100 , similarity 100
, identity 100 , evalue 3.06e-45 , alnlength 88 ,
Bacteria;Viruses , Proteobacteria;Uroviricota ,
WP_010082293.1 MULTISPECIES: DUF2312 domain-containing
protein [Wolbachia]"
gene 4301..4876
/locus_tag="wEsol_01615"
CDS 4301..4876
/locus_tag="wEsol_01615"
/codon_start=1
/transl_table=11
/fullproduct="qcoverage 100 , hcoverage 100 , similarity
100 , identity 100 , evalue 4.42e-128 , alnlength 191 ,
Bacteria , Proteobacteria , WP_006280027.1 MULTISPECIES:
UbiX family flavin prenyltransferase [Wolbachia]"
/cog="UbiX COG0163 191 3-polyprenyl-4-hydroxybenzoate
decarboxylase"
/pfam="Flavoprotein"
/tigr="TIGR00421 ubiX_pad 181 polyprenyl
P-hydroxybenzoate and phenylacrylic acid decarboxylases"
/product="UbiX family flavin
prenyltransferase"
/translation="MNSRIVIGISGASGSIYGVRIEALKDVDYETHLVISRAGKITL
AHEIKEKLEDITSLADFYIYSEEKIGEKIASGSFKTSGMIVAPCSMKTMSEIASGVTSN
LLTRAADVTLKERRKLVLMVRESPLHLGHLQNLMLKLTMGAIAPPVPAFYIKPKSLD
DIINHSVGKVLDFDIKLPDFKEWQGSNDYY"
/blasthit="qcoverage 100 , hcoverage 100 , similarity 100
, identity 100 , evalue 4.42e-128 , alnlength 191 ,
Bacteria , Proteobacteria , WP_006280027.1 MULTISPECIES:
UbiX family flavin prenyltransferase [Wolbachia]"
gene 4860..5747
/locus_tag="wEsol_01616"
CDS 4860..5747
/locus_tag="wEsol_01616"
/codon_start=1
/transl_table=11
/fullproduct="qcoverage 100 , hcoverage 100 , similarity
100 , identity 100 , evalue 7.58e-208 , alnlength 295 ,
Bacteria , Proteobacteria , WP_141456891.1 MULTISPECIES:
bifunctional methylenetetrahydrofolate
dehydrogenase/methenyltetrahydrofolate cyclohydrolase
Fold [unclassified Wolbachia]"
/cog="Fold COG0190 283 5,10-methylene-tetrahydrofolate
dehydrogenase/Methenyl tetrahydrofolate cyclohydrolase"
/pfam="THF_DHG_CYH THF_DHG_CYH_C Pfam-B_3397"
/product="bifunctional
methylenetetrahydrofolate
dehydrogenase/methenyltetrahydrofolate cyclohydrolase
Fold"
/translation="MTIIIDGKKIANDLCERLSQKIDILKREYNIFPCLKVILVGSNP
ASQVYVRNKQKKAESIGISSETIVLPDNISEDELIEKINELNEDPSVHGILVQLPLPN
HISASRVINTVSVEKDVDGFDENVGKLVKGEKNCLIPCTPKGSLHLIKSIEENLSGK
NAVVIGRSNIVGKPMFYLLQLQENCTVTILHSQSKDLAEYCASKADIVVAAGKPNFVQA
DWIKKGAIVIDVGINSVNVGEQSKLVGDVDFGGIKEKVKAITPVPGGVGPMTIAFLMM
NTVIAACLQKGVDA SNFIS"
/blasthit="qcoverage 100 , hcoverage 100 , similarity 100
, identity 100 , evalue 7.58e-208 , alnlength 295 ,
Bacteria , Proteobacteria , WP_141456891.1 MULTISPECIES:
bifunctional methylenetetrahydrofolate
dehydrogenase/methenyltetrahydrofolate cyclohydrolase

```

```

Fold [unclassified Wolbachia]"
gene      complement(5943..6122)
          /locus_tag="wEsol_01617"
CDS       complement(5943..6122)
          /locus_tag="wEsol_01617"
          /codon_start=1
          /transl_table=11
          /product="hypothetical protein"
          /pfam="Pfam-B_5968 APS_kinase AAA_18"
          /translation="MKTIIIFITGVSTVGKSSLAHILGSKLFMPRNFAIPLTIANPRKV
SLRHTAAVSLDPANT"
          /besthit="qcoverage 83.0508474576271 , hcoverage
74.2424242424242 , similarity 65.3 , identity 51.0 ,
evaluate 9.00e-06 , alnlength 49 , Bacteria ,
Proteobacteria , OAL97015.1 hypothetical protein
TV42_05260 [Wolbachia endosymbiont of Dactylopius
coccus]"

```

# ORIGIN

```

1  gacgccattg cctgaacggg taccaatgat tacctatcaa tctcaccaaa aactatatcg
61 agtgagccaa taattgctgc aacgtcagca agcatgtgtc cttttgccat aaagtctaag
121 gcttgtaaat gcgcaaagcc aggtgctctt attcggcacc tataaggtct attggtacca
181 tctgaaacta tatacactcc aaactcacct tttggtgcct caacaactgc gtaagcctca
241 ctttctggta cgtgatatcc ttctgaatag agcttaaaat ggtgaatcag agcttccata
301 gattttttca tctctgctct tgacggtgga gaaatttttc tatcttcagt ttttatttgc
361 ctttcaggca ttttctctat gcactgcttc accaaactga tagattgcct aatctctgcc
421 attctaacta gataacggtc ataacagtcg ccattttggc cgatcgggat atcaaaatct
481 agttgatcat atatctcata tggctggctt ttctgcaaat cccaagcaag ccagcagcgc
541 cgcaacattg ggccactaaa gccccaatca agtgcctgtt taattgatat ttcactaatt
601 cctacagtgc gttgcttcca tatcctatth tctgttaaaa gttcatcaac atcgtctata
661 tattttggaa attgctctat aaactttgca atatcctcaa tcaaactctt tggaaacatct
721 gctgcaattc cacctggcct gatgtaagct gcgtgaaacc ttgcacctga agctctttcg
781 taaaattcca gtattttttc tctttcttca aagagccata aaagaggggt cattgctcca
841 acatcaagtg cttgagaaga aacgttcagt aaatgattta gtattctcgt cagttcacaa
901 aacaagacac gtaaataactt tgccctaatt ggcacttcac attgcaacaa tttctccaca
961 caaagtgaat atgcatgctc ttgtgacatt ggtgatacgt aatcaaggcg atcaaaaataa
1021 ggcaaagctt gaagatacgt tttatgttct attaatthttt cagtaccgcg gtgcagaagc
1081 ccaatatggg gatctgccct ctcgatcact tcaccatcca tctctaaaac aagacgcgaac
1141 actccatgtg cagctgggtg ctgaggtcca aaatttaaca tcattgtctt tagatcgggc
1201 atgtccagta gtttaagata ttaaaattgt ataggctaaa gtgcgctcaa agtcaataaaa
1261 cttcttgcat aggctacaac tatcattcaa tagaaacaaa aactttttaca atggctaata
1321 agtgttggta aaaccaagtc acttttagcta tagaatgaca aaaaagggtt gcattagcca
1381 aatttttagt tgaagtagca taagagggtt aaggaaaagc tttgtgttaa tggattcatt
1441 tcaggtatag tatagataac accacaatac ttataaaatg gatcatgttg ttaatgcgta
1501 taatagactt gacactccta tagttagggg agaaggggta tatctttttg atagaggtgg
1561 taaaaaatat ttagattttg ctgcaggtat ttctacaact tctttagggc attgtcatcc
1621 atacattaca gataagctga aagagcaatt gagctcacta tggcactgct ctaacatttt
1681 tactattccc gagcaagaaa ggcttgccga gcgtttaaca actcttactt ttgcagataa
1741 agtttttttc tgctcaagtg ggcttgaagc aacagaagct gcaattaagt ttattcgtcg
1801 ttattttttac ttgaaagggc aagcaaaacg taatcgtatt attacaattg aaggaggggtt
1861 tcatggccgc agtattgctg caatttctgc tggaggcagt gaaaaatcac gcgaagggtt
1921 tgctccgctt ctttctggtt ttgataaagt gccaaagaaat gacattaaag ctttgagaa
1981 aaaaatcagc gatgagacag ctgctgtgtt ttagagccc atacaaagtg aagggtggagt
2041 atatccacta gacgtagaat atcttcaaaa agtaagggaa ataacaaaag ctcaaggaat
2101 aattttgtgc tttgatgaag tgcagtgcgc atatggacgc atcggttctt tatttcatta
2161 tcaaaatgtc ggcattgaac ctgatatgct aacctgtgcg aaggctatgg gtaacgggtt
2221 tcctgtagct gcatgtttag tgaaagatta tatagcagaa gcaattactc caggaactca
2281 tggatcaacc tatggtggca atccacttgc catgactgtt ggtaatgcag tgctcgatat
2341 aatgctaaaa gaaggctttt ttgatcatgt taaaagaatt agtaaatatt taaaagaaaa
2401 gctgttgctt ttagctaaag aatttcctga gatgatttta gaagttcgtg gagaagggtt
2461 actaatggga atagaactag caactcttgt agctgataaa attattagtc gatctcttga

```

|      |             |             |             |             |             |             |
|------|-------------|-------------|-------------|-------------|-------------|-------------|
| 2521 | taaaggttta  | ataataacta  | gggtttttaa  | caacaaagta  | gtaagggtaa  | ccccaccact  |
| 2581 | tatcattgag  | gatgagcatg  | tgaacgcagc  | gtgtaatatg  | ctttatgatt  | tgttttttaa  |
| 2641 | gattaaaggt  | atataaaatt  | cggcaatata  | aattcaggct  | tgcaaatgcc  | tctcataaca  |
| 2701 | tgtaaaatta  | attttatttt  | ttatcacaat  | aacatcgta   | tttaattggat | tggttattgg  |
| 2761 | tcttagtata  | atcagcaatt  | tttgttttgt  | tagttttatc  | gtttttgttc  | tcaggagcag  |
| 2821 | aaataggctt  | aacctcaatt  | agccgttctc  | gagttaataa  | gctaaagcta  | gacggtaaca  |
| 2881 | aaaaagccag  | ggtaatagat  | cgcttattaa  | ataggaaaga  | attgacaata  | ggaacggtat  |
| 2941 | tgctcggcaa  | tacaattatt  | aatattactt  | gctctgcttt  | atttacagca  | atatttatca  |
| 3001 | atcttttttg  | aaatgagggc  | attctcctat  | caacaattat  | aatgacattt  | tgtattttat  |
| 3061 | tgttctgcga  | agttctacca  | aaaacttatg  | ctattcaaaa  | tcctgaaaaa  | tttgcacat   |
| 3121 | tttctgctta  | ttttgtattg  | ttttttgtaa  | agattttttc  | tccattgaca  | ctaggtattc  |
| 3181 | aattttattgt | taacctcatc  | ctaaaattat  | gtgggctgca  | taaagataag  | gaagtgatat  |
| 3241 | ctgcagcgga  | tgcaatgcgt  | aatatgatta  | ctcttcaccg  | cagtgaagga  | actatgttgc  |
| 3301 | aacaggattt  | agatatgcta  | agcagcatac  | ttgatttggc  | tgagacagag  | atatcacaaa  |
| 3361 | ttatgaccca  | tagaagaaac  | ctattttctc  | ttgatataga  | tcggaataaa  | gaagagttaa  |
| 3421 | taagagagat  | tttaaccagc  | agtcacagta  | gagtaccttt  | atggcagaag  | gaaccagata  |
| 3481 | acattgtagg  | tgtaattcac  | gtgaaagctc  | taataaatgc  | tttgcgtgaa  | aagaataata  |
| 3541 | aagcgggaag  | agttgacatt  | acccaagtta  | tgtcaaggcc  | ttggttcata  | ccagaaagta  |
| 3601 | caccgctcag  | cgtgcaactt  | cacaacttcc  | gtaagaacag  | gaaacacctt  | gcatttgtta  |
| 3661 | ttgatgagta  | tggagcactg  | caggggaattg | taactcttga  | ggatatactg  | gaagaaatag  |
| 3721 | ttggagaaat  | ttcggatgaa  | catgatttga  | ttacggagaa  | ttttataaag  | aaaatatctg  |
| 3781 | ataatatgta  | tcacatagaa  | ggaaaatcta  | ctattagggg  | cattaacagg  | cagttatact  |
| 3841 | ggaatctccc  | tgatgaagaa  | gctacaactc  | tagcagggtat | gattgtgaat  | gaaatagagc  |
| 3901 | gcattcctga  | cgaaggcgag  | gagttttcca  | tgtatggttt  | tcgctttaag  | attttaaaaa  |
| 3961 | aagataaaaa  | tattattact  | gttggtgaag  | tgcaagtaaa  | aactggtaat  | attagtggca  |
| 4021 | gcaattaatt  | agtggagttt  | catggaagat  | acagtaaaaa  | taacggctga  | agagttgaag  |
| 4081 | ggttacatag  | agagaatcga  | aaaacttgaa  | caagaaaaga  | gggatgtgca  | agatcacatt  |
| 4141 | cgtgatgtat  | atgcaaaaagc | cgcagatgaa  | ggttgggata  | taaaagtgat  | gaaacaaatt  |
| 4201 | attaggctga  | ggaagatgga  | tgatgatgac  | agagaggaac  | aagaaatatt  | gcttgatacc  |
| 4261 | tataaacgtg  | cattgggaat  | gagctacgaa  | gaagagttaa  | gtgaatagca  | gaattgtaat  |
| 4321 | tggaataagt  | ggagcatctg  | gttctattta  | cgggtgtcgt  | attttagaag  | cgttgaaaga  |
| 4381 | cgtcgattat  | gaaactcatt  | tagtgataag  | tcgtgctggg  | aaaataactt  | tagctcacga  |
| 4441 | gattaaagaa  | aaacttgaag  | atattacatc  | acttgcagat  | ttttactatt  | ctgaagaaaa  |
| 4501 | gattggagaa  | aaaatagcaa  | gcggctcatt  | taaaacctca  | gggatgattg  | tagcaccatg  |
| 4561 | ctctatgaag  | acaatgtctg  | aaatcgcatc  | aggtgttact  | tccaatctat  | tgacaagggc  |
| 4621 | tgcatatgta  | acgctaaaaag | aaagaagaaa  | gttagttctt  | atgggtgcgag | agtcaccact  |
| 4681 | gcatcttggg  | cattttacaaa | atatgtttaa  | attaacggag  | atgggagcaa  | ttattgctcc  |
| 4741 | accagtacca  | gctttttata  | ttaaaccaa   | atcgttggat  | gatattatta  | atcattctgt  |
| 4801 | tggcaaagta  | ttggatttat  | ttgatatcaa  | attacccgac  | tttaaggagt  | ggcaaggaag  |
| 4861 | tgacaattat  | tattgatggg  | aaaaaaatag  | caaacgacct  | atgtgagagg  | ctatcacaaa  |
| 4921 | aaattgatata | tttaaagaga  | gagtataaca  | tttttccttg  | cctgaaagta  | attctcgtgg  |
| 4981 | gcagcaatcc  | agcaagtcag  | gtttatgttc  | gcaacaaaca  | gaaaaaagca  | gaatcaatag  |
| 5041 | gcataagttc  | tgagaccatt  | gttttgcttg  | ataatatctc  | agaagatgaa  | tttaattgaaa |
| 5101 | aatcaatga   | atataatgaa  | gatccatctg  | tgcatggcat  | tttagtgcaa  | ttgcctttac  |
| 5161 | caaatcatat  | tagtgcaagc  | agagtaatta  | acacagtaag  | tgttgaaaaa  | gatgtagatg  |
| 5221 | gctttcatga  | tgaaaacggt  | ggcaaattag  | ttaaagggtga | aaaaaactgc  | cttatacctt  |
| 5281 | gcactcctaa  | aggttctttg  | catttaatta  | agtcaattga  | agagaacctt  | tccggtaaaa  |
| 5341 | acgcagtggg  | aattggtagg  | tcaaataatcg | tgggcaagcc  | aatgttttac  | ctgctattgc  |
| 5401 | aagaaaactg  | cactgtcacc  | atcttgcatt  | cacaaagcaa  | agatttagct  | gaatattgct  |
| 5461 | ctaaagcgga  | tatagtagtt  | gcagcagtcg  | gaaagccaaa  | ttttgttcaa  | gcagactgga  |
| 5521 | taaagaaagg  | tgcaatagtg  | atcgatgttg  | gcataaatag  | cgtaaacgta  | ggagaacaaa  |
| 5581 | gtaagctcgt  | aggtgatgtt  | gacttcgggg  | gaataaaaaga | aaaagtcaaa  | gctattaccc  |
| 5641 | cagtaccggg  | gggcgtttgg  | ccaatgacca  | ttgcatttct  | aatgatgaac  | actgttattg  |
| 5701 | ctgcttgctt  | gcagaaggga  | gttgatgctt  | ctaatttcat  | tagttgagggt | atgaagagga  |
| 5761 | agctgtatga  | agatagaatg  | taccacatct  | cacaattaat  | aaaaaattga  | gatttttgaa  |
| 5821 | attcctcggt  | agtcaaatct  | attaaatatt  | taggatcatc  | atctattctt  | ttttctctac  |
| 5881 | aagtatagct  | aaagtggctt  | aggtttacct  | acaatttgaa  | aaacaacaaa  | ttcgtcattc  |
| 5941 | cgctacgtgt  | tagcgggatc  | tagagatacc  | gcggcggtat  | gacgtagggg  | aacctttctt  |
| 6001 | gggttagcta  | tagtttagtg  | aattgcaaag  | tttctaggga  | taaaaagctt  | tgaacctaat  |
| 6061 | atatgagcca  | aacttgattt  | tccaaccgta  | gatacacctg  | taataaaaaa  | aatagtcttc  |

6121 attttatgaa tttacttgct atatgaacta tcggagaaat ttttt

//

LOCUS JAQZAU010000141 1372 bp dna linear ENV 17-MAR-2023  
DEFINITION MAG: Wolbachia pipientis isolate wEsol contig\_7860, whole genome  
shotgun sequence.  
ACCESSION JAQZAU010000141 JAQZAU010000000  
VERSION JAQZAU010000141.1  
DBLINK BioProject: PRJNA929258  
BioSample: SAMN33142973  
KEYWORDS WGS; ENV; Metagenome Assembled Genome; MAG.  
SOURCE Wolbachia pipientis (insect metagenome)  
ORGANISM Wolbachia pipientis  
Bacteria; Pseudomonadota; Alphaproteobacteria; Rickettsiales;  
Anaplasmataceae; Wolbachieae; Wolbachia.  
REFERENCE 1 (bases 1 to 1372)  
AUTHORS Fiutek,N., Couger,B.M., Roy,S., de la Torre,J.R. and Connor,E.F.  
TITLE Genomic assessment of the contribution of the Wolbachia  
endosymbiont of Eurosta solidaginis to gall-induction  
JOURNAL International Journal Molecular Sciences  
REFERENCE 2 (bases 1 to 1372)  
AUTHORS Fiutek,N., Couger,B.M., Roy,S., de la Torre,J.R. and Connor,E.F.  
TITLE Direct Submission  
JOURNAL Submitted (10-FEB-2023) Biology, San Francisco State University,  
1600 Holloway Ave, San Francisco, CA 94132, USA  
COMMENT ##Genome-Assembly-Data-START##  
Assembly Date :: JUN-2019  
Assembly Method :: FLYE v. 06-2019  
Genome Representation :: Full  
Expected Final Version :: Yes  
Genome Coverage :: 100.0x  
Sequencing Technology :: Illumina HiSeq; PacBio Sequel  
##Genome-Assembly-Data-END##  
FEATURES Location/Qualifiers  
source 1..1372  
/organism="Wolbachia pipientis"  
/mol\_type="genomic DNA"  
/submitter\_seqid="contig\_7860"  
/isolate="wEsol"  
/isolation\_source="galls on Solidago altissima"  
/host="Eurosta solidaginis MN-2018-EFC"  
/db\_xref="taxon:955"  
/environmental\_sample  
/country="USA: Cowling Arboretum, Carleton College,  
Northfield, MN"  
/lat\_lon="44.48 N 93.13 W"  
/altitude="280 m"  
/collection\_date="2018-11"  
/metagenome\_source="insect metagenome"  
/note="metagenomic"  
gene complement(<1..141)  
/locus\_tag="wEsol\_01618"  
CDS complement(<1..141)  
/locus\_tag="wEsol\_01618"  
/codon\_start=1  
/transl\_table=11  
/fullproduct="qcoverage 100 , hcoverage 100 , similarity  
100 , identity 100 , eval 2.02e-23 , alnlength 47 ,  
Bacteria , Proteobacteria , WP\_153296793.1 MULTISPECIES:  
hypothetical protein [Wolbachia]"  
/translation="MLYSTQSIFLDPSSQGTAFVFEEKSAITLNLPLQTNVRTVMCQ

```

LLA"
/product="hypothetical protein"
/besthit="qcoverage 100 , hcoverage 100 , similarity 100
, identity 100 , evalue 2.02e-23 , alnlength 47 ,
Bacteria , Proteobacteria , WP_153296793.1 MULTISPECIES:
hypothetical protein [Wolbachia]"
gene 340..642
/locus_tag="wEsol_01619"
CDS 340..642
/locus_tag="wEsol_01619"
/codon_start=1
/transl_table=11
/fullproduct="qcoverage 100 , hcoverage 100 , similarity
98.0 , identity 97.0 , evalue 9.90e-61 , alnlength 100 ,
Bacteria , Proteobacteria , WP_213863658.1 transposase
[Wolbachia endosymbiont of Ceratitis capitata]"
/cog="COG2963 COG2963 116 Transposase and inactivated
derivatives"
/pfam="HTH_Tnp_1 HTH_23 HTH_28"
/product="transposase"
/translation="MAREYTAEFKLEAVKLTNEQRKVGQPVAKVARDLGIRDSVLGKW
MKKHNEKKSAADAFPGRGNMAPYDKERFDLQSKSNKGKRHLKKSPGQSKRVKYFFI"
/besthit="qcoverage 100 , hcoverage 100 , similarity 98.0
, identity 97.0 , evalue 9.90e-61 , alnlength 100 ,
Bacteria , Proteobacteria , WP_213863658.1 transposase
[Wolbachia endosymbiont of Ceratitis capitata]"
gene 1065..1229
/locus_tag="wEsol_01620"
CDS 1065..1229
/locus_tag="wEsol_01620"
/codon_start=1
/transl_table=11
/fullproduct="qcoverage 100 , hcoverage 100 , similarity
100 , identity 100 , evalue 2.06e-28 , alnlength 54 ,
Bacteria , Proteobacteria , WP_167482801.1 hypothetical
protein [Wolbachia endosymbiont of Carposina sasakii]"
/cog="Tra5 COG2801 232 Transposase and inactivated
derivatives"
/pfam="rve"
/product="hypothetical protein"
/translation="MSSSINKQLVMDSSLMDVNRKPKAKNLLLHSDQGSQYTLQGYQY
LLSIKNIDES"
/besthit="qcoverage 100 , hcoverage 100 , similarity 100
, identity 100 , evalue 2.06e-28 , alnlength 54 ,
Bacteria , Proteobacteria , WP_167482801.1 hypothetical
protein [Wolbachia endosymbiont of Carposina sasakii]"
gene 1219..>1372
/locus_tag="wEsol_01621"
CDS 1219..>1372
/locus_tag="wEsol_01621"
/codon_start=1
/transl_table=11
/pfam="rve_3 rve rve_2"
/fullproduct="qcoverage 100 , hcoverage 100 , similarity
100 , identity 100 , evalue 8.08e-31 , alnlength 50 ,
Bacteria , Proteobacteria , WP_174517046.1 IS3 family
transposase [Wolbachia endosymbiont of Cardiocondyla
obscurior]"
/translation="MSHKGCCYDNSVVESFFSSLKRELPIDTSRHRSKQHIKTAIFEYI
EIFWEC"

```

```

/product="IS3 family transposase"
/besthit="qcoverage 100 , hcoverage 100 , similarity 100
, identity 100 , evaluate 8.08e-31 , alnlength 50 ,
Bacteria , Proteobacteria , WP_174517046.1 IS3 family
transposase [Wolbachia endosymbiont of Cardiocondyla
obscurior]"

```

# ORIGIN

```

1  tgcaagtagc  tgacacataa  ctgtacgaac  atttgtttgc  aaaggcagta  tgttaagtgt
61  tatagccgat  tttgcctcaa  acacaaaggc  agtgccttga  ctacttggat  ccagaaaaat
121 tgattgtgta  ctatacaaca  ttttcgatta  aaagcgtaac  cgttcactgt  tagactgcat
181 tctgtgattt  ttagcaaaac  atgatctttc  atttgagctt  ctttcaattt  aaaataaata
241 cagaaaattg  ctgcctatag  ctaaactgac  cttaccaga  aaaagtggag  agaaagaaag
301 gagttttttc  gggtaaaata  aaatttttga  ggattagaaa  tggcaagaga  atatacggca
361 gaattcaaat  tggaagctgt  taagctgaca  aatgaacaaa  gaaaggtagg  tcaaccagtt
421 gcaaaagtag  caagagatct  aggaataagg  gatagtgtat  taggaaaatg  gatgaagaaa
481 cacaacgaaa  aaaagtcggc  agcagatgca  tttccaggta  gaggtaacat  ggctccttac
541 gacaaagaga  ggtttgattt  acaaagcaag  agtaacaagg  gaaagagaca  tttaaaaaaa
601 agccctggcc  agtcaaaaag  agtaaaatat  ttttttatat  agtaactgct  ataaagtaca
661 ggaattatgt  aggattttct  gctagtggct  actataagtg  gaccacaaga  aaaataagca
721 gtagagaatc  agcaataaaa  gagttattag  cagatatcca  aaaaatatat  caagcttcta
781 aatgtagata  tggagctcct  aaaattcatg  ctgaattgaa  ggctttgggt  aaaagttgca
841 atttgaaaac  ggtgcaaagt  attatgcaga  aaaatgacat  cagggctata  ctgagaagaa
901 agtttaaaat  taaaaaacia  caaacggaca  gtagctccca  atatattaga  ccaaaacttt
961 attgtcgatc  aaccaaataa  agtatgggat  tacttatata  aaaaccaaag  aaggatggct
1021 atatttggca  acaataatcg  atctacattc  acgcatggta  gttaatgagc  agttcaataa
1081 ataaacaatt  gggttatggc  tctttattaa  tggacgttaa  caagcgtaaa  cctgccaaaa
1141 atctactatt  acatagtgat  caaggttcac  aatatacttt  gcaaggttat  caatatctct
1201 tatccataaa  aaacatagat  gagtcataaa  gggtgttggt  acgacaattc  tgttggtgaa
1261 agcttcttca  gttctctaaa  aaggaggat  ccaatagaca  cctctcggca  ctctaaacag
1321 catatcaaaa  ctgctatatt  tgaatatata  gaaatttttt  gggagtgtta  aa

```

```

//
LOCUS      JAQZAU010000142                19308 bp    dna        linear    ENV 17-MAR-2023
DEFINITION MAG: Wolbachia pipientis isolate wEsol contig_7864, whole genome
            shotgun sequence.
ACCESSION  JAQZAU010000142 JAQZAU010000000
VERSION    JAQZAU010000142.1
DBLINK     BioProject: PRJNA929258
            BioSample: SAMN33142973
KEYWORDS   WGS; ENV; Metagenome Assembled Genome; MAG.
SOURCE     Wolbachia pipientis (insect metagenome)
ORGANISM   Wolbachia pipientis
            Bacteria; Pseudomonadota; Alphaproteobacteria; Rickettsiales;
            Anaplasmataceae; Wolbachieae; Wolbachia.
REFERENCE  1 (bases 1 to 19308)
AUTHORS    Fiutek,N., Couger,B.M., Roy,S., de la Torre,J.R. and Connor,E.F.
TITLE      Genomic assessment of the contribution of the Wolbachia
            endosymbiont of Eurosta solidaginis to gall-induction
JOURNAL     International Journal Molecular Sciences
REFERENCE  2 (bases 1 to 19308)
AUTHORS    Fiutek,N., Couger,B.M., Roy,S., de la Torre,J.R. and Connor,E.F.
TITLE      Direct Submission
JOURNAL     Submitted (10-FEB-2023) Biology, San Francisco State University,
            1600 Holloway Ave, San Francisco, CA 94132, USA
COMMENT    ##Genome-Assembly-Data-START##
            Assembly Date      :: JUN-2019
            Assembly Method    :: FLYE v. 06-2019
            Genome Representation :: Full
            Expected Final Version :: Yes
            Genome Coverage    :: 100.0x
            Sequencing Technology :: Illumina HiSeq; PacBio Sequel

```

```

##Genome-Assembly-Data-END##
FEATURES             Location/Qualifiers
     source            1..19308
                        /organism="Wolbachia pipientis"
                        /mol_type="genomic DNA"
                        /submitter_seqid="contig_7864"
                        /isolate="wEsol"
                        /isolation_source="galls on Solidago altissima"
                        /host="Eurosta solidaginis MN-2018-EFC"
                        /db_xref="taxon:955"
                        /environmental_sample
                        /country="USA: Cowling Arboretum, Carleton College,
                        Northfield, MN"
                        /lat_lon="44.48 N 93.13 W"
                        /altitude="280 m"
                        /collection_date="2018-11"
                        /metagenome_source="insect metagenome"
                        /note="metagenomic"
     gene              <1..104
                        /locus_tag="wEsol_01622"
     CDS                <1..104
                        /locus_tag="wEsol_01622"
                        /codon_start=1
                        /transl_table=11
                        /product="hypothetical protein"
                        /translation="VHEIAKPLQKQETSTFAKQVEESRNADSQKGRSV"
                        /besthit="qcoverage 100 , hcoverage 12.7906976744186 ,
                        similarity 100 , identity 100 , evalue 8.11e-10 ,
                        alnlength 33 , Bacteria , Proteobacteria , WP_041573495.1
                        MULTISPECIES: hypothetical protein [unclassified
                        Wolbachia]"
     gene              complement(508..672)
                        /locus_tag="wEsol_01623"
     CDS                complement(508..672)
                        /locus_tag="wEsol_01623"
                        /codon_start=1
                        /transl_table=11
                        /fullproduct="qcoverage 100 , hcoverage 100 , similarity
                        100 , identity 100 , evalue 2.14e-30 , alnlength 54 ,
                        Bacteria , Proteobacteria , WP_010082072.1 MULTISPECIES:
                        IS3 family transposase [Wolbachia]"
                        /cog="Tra5 COG2801 232 Transposase and inactivated
                        derivatives"
                        /pfam="rve_3 rve_2"
                        /product="IS3 family
                        transposase"
                        /translation="MSNKGCCYDNSVAESFFSSLKREILIDTSQHSAQQTRTAIFEYI
                        EIFYNKQRHY"
                        /besthit="qcoverage 100 , hcoverage 100 , similarity 100
                        , identity 100 , evalue 2.14e-30 , alnlength 54 ,
                        Bacteria , Proteobacteria , WP_010082072.1 MULTISPECIES:
                        IS3 family transposase [Wolbachia]"
     gene              complement(831..1028)
                        /locus_tag="wEsol_01624"
     CDS                complement(831..1028)
                        /locus_tag="wEsol_01624"
                        /codon_start=1
                        /transl_table=11
                        /fullproduct="qcoverage 100 , hcoverage 100 , similarity
                        100 , identity 100 , evalue 1.88e-40 , alnlength 65 ,

```

Bacteria , Proteobacteria , WP\_010082070.1 hypothetical  
 protein [Wolbachia endosymbiont of Drosophila incompta]"  
 /translation="MQKNDIRAILRRKFKIKKQQTDNRAVAPNILDQNFIVDQPNKVW  
 DYLHQNQGGMAIFGSNNSHVW"  
 /product="hypothetical protein"  
 /besthit="qcoverage 100 , hcoverage 100 , similarity 100  
 , identity 100 , evalue 1.88e-40 , alnlength 65 ,  
 Bacteria , Proteobacteria , WP\_010082070.1 hypothetical  
 protein [Wolbachia endosymbiont of Drosophila incompta]"  
 complement(1250..1552)  
 /locus\_tag="wEsol\_01625"  
 CDS complement(1250..1552)  
 /locus\_tag="wEsol\_01625"  
 /codon\_start=1  
 /transl\_table=11  
 /fullproduct="qcoverage 100 , hcoverage 100 , similarity  
 100 , identity 100 , evalue 1.77e-63 , alnlength 100 ,  
 Bacteria , Proteobacteria , WP\_081600753.1 MULTISPECIES:  
 transposase [unclassified Wolbachia]"  
 /cog="COG2963 COG2963 116 Transposase and inactivated  
 derivatives"  
 /pfam="HTH\_Tnp\_1 HTH\_23 HTH\_28"  
 /product="transposase"  
 /translation="MVREYTAEFKLEAVKLANEQRKAGQTITKIARDLGIKGGLLGKW  
 IKKHNEKKSAAAFPGNGMAPYDKERFDLQSKSNKGKRHLKKSPGQSKRVKYFFI"  
 /besthit="qcoverage 100 , hcoverage 100 , similarity 100  
 , identity 100 , evalue 1.77e-63 , alnlength 100 ,  
 Bacteria , Proteobacteria , WP\_081600753.1 MULTISPECIES:  
 transposase [unclassified Wolbachia]"  
 gene 1747..2022  
 /locus\_tag="wEsol\_01626"  
 CDS 1747..2022  
 /locus\_tag="wEsol\_01626"  
 /codon\_start=1  
 /transl\_table=11  
 /pfam="HNH\_HNH\_3"  
 /fullproduct="qcoverage 100 , hcoverage 100 , similarity  
 100 , identity 100 , evalue 2.74e-65 , alnlength 91 ,  
 Bacteria , Proteobacteria , WP\_039963646.1 MULTISPECIES:  
 HNH endonuclease [unclassified Wolbachia]"  
 /translation="MLLNKVQKTRSPYDGDWVYWGKRLRKIPDKPLGVIKLLRLHQSK  
 CDNCRLWFKSDDTIKIHKKDQNRNRMITNLSLLHGHCHDELHRRCA"  
 /product="HNH endonuclease"  
 /besthit="qcoverage 100 , hcoverage 100 , similarity 100  
 , identity 100 , evalue 2.74e-65 , alnlength 91 ,  
 Bacteria , Proteobacteria , WP\_039963646.1 MULTISPECIES:  
 HNH endonuclease [unclassified Wolbachia]"  
 gene 2019..2429  
 /locus\_tag="wEsol\_01627"  
 CDS 2019..2429  
 /locus\_tag="wEsol\_01627"  
 /codon\_start=1  
 /transl\_table=11  
 /fullproduct="qcoverage 100 , hcoverage 100 , similarity  
 99.3 , identity 99.3 , evalue 4.37e-81 , alnlength 136 ,  
 Bacteria , Proteobacteria , WP\_174517022.1 MULTISPECIES:  
 hypothetical protein [unclassified Wolbachia]"  
 /pfam="PDDEXK\_2 Pfam-B\_5253"  
 /tigr="TIGR01784 T\_den\_put\_tspse 273 conserved  
 hypothetical protein"

```

/product="hypothetical protein"
/translation="MKSTKLESRMRLKVSRTVLKSSEEGRPSSLRQQYADETTEEDL
RKIAEKAPIIKLVYDELDRFSWNEKDLVAYEERIMDLLKEEGILAKKLDEGKIEGKIE
VAKNLLKADISIDIISQTTGLPQAEIKRLQEEIT"
/besthit="qcoverage 100 , hcoverage 100 , similarity 99.3
, identity 99.3 , evalue 4.37e-81 , alnlength 136 ,
Bacteria , Proteobacteria , WP_174517022.1 MULTISPECIES:
hypothetical protein [unclassified Wolbachia]"
gene 2437..3441
/locus_tag="wEsol_01628"
CDS 2437..3441
/locus_tag="wEsol_01628"
/codon_start=1
/transl_table=11
/fullproduct="qcoverage 100 , hcoverage 100 , similarity
99.7 , identity 99.7 , evalue 5.72e-234 , alnlength 334 ,
Bacteria , Proteobacteria , WP_007548295.1 MULTISPECIES:
Mrp/NBP35 family ATP-binding protein [Wolbachia]"
/cog="Mrp COG0489 265 ATPases involved in chromosome
partitioning"
/pfam="DUF59 Pfam-B_235 Pfam-B_2460 Pfam-B_3718 AAA_31
VirC1 MipZ Pfam-B_2271 Pfam-B_4013 CbiA ArsA_ATPase
AAA_25 SRP54 Fer4_NifH ParA"
/product="Mrp/NBP35 family
ATP-binding protein"
/translation="MINEKIVRENLKKVIEQKSGKDVIALGISSIIIKGQDVGFVLE
VAGNTQANEELRRNCEQAVKAIPGVTKVTVVATCQKQTGQQKAKLHIEGVKNIIVVAS
GKGGVVGKSTVALNLALSALAKLKHKVALVDADIYGPSIPKMLGAEKLKPEIQDSKAMPI
EKYGLHTISIGYFIDKDRAAIWRGPMITKALYSLLMGTKWSDIEYLIIDTPPGTGDVH
LSLMENFNLTGAIIVSTPQELSLIDARKIYDMFTKLSVPVIGIVENMSYFIQSGSKIY
IFGKDGAKKMSEELGIKLLGRVPLDPQICHASDCGNPLMLSEDLAGIYEDIAQSIVKQ
"
/besthit="qcoverage 100 , hcoverage 100 , similarity 99.7
, identity 99.7 , evalue 5.72e-234 , alnlength 334 ,
Bacteria , Proteobacteria , WP_007548295.1 MULTISPECIES:
Mrp/NBP35 family ATP-binding protein [Wolbachia]"
gene complement(3648..3989)
/locus_tag="wEsol_01629"
CDS complement(3648..3989)
/locus_tag="wEsol_01629"
/codon_start=1
/transl_table=11
/fullproduct="qcoverage 100 , hcoverage 100 , similarity
100 , identity 100 , evalue 1.53e-79 , alnlength 113 ,
Bacteria , Proteobacteria , AAS13810.1 transposase, IS5
family, OrfB [Wolbachia endosymbiont of Drosophila
melanogaster]"
/cog="COG3293 COG3293 124 Transposase and inactivated
derivatives"
/pfam="DDE_Tnp_1_2 DDE_Tnp_1"
/product="transposase, IS5 family, OrfB"
/translation="MRTKYTKVKKMWADMGYQGRNLKNHIKEEYDIDIEIVKRPPCRF
WVHKDTPPELLPTREQGFKVQPRRWVVERTFAWVNRNRRLSKEYDLLTTSTENFIYLA
MSRVMLKREYA"
/besthit="qcoverage 100 , hcoverage 100 , similarity 100
, identity 100 , evalue 1.53e-79 , alnlength 113 ,
Bacteria , Proteobacteria , AAS13810.1 transposase, IS5
family, OrfB [Wolbachia endosymbiont of Drosophila
melanogaster]"
gene complement(4100..4480)

```

```

CDS      /locus_tag="wEsol_01630"
         complement(4100..4480)
         /locus_tag="wEsol_01630"
         /codon_start=1
         /transl_table=11
         /fullproduct="qcoverage 100 , hcoverage 100 , similarity
100 , identity 100 , evalue 1.16e-87 , alnlength 126 ,
Bacteria , Proteobacteria , AOV87106.1 transposase
[Wolbachia endosymbiont of Drosophila incompta]"
         /cog="COG3293 COG3293 124 Transposase and inactivated
derivatives"
         /pfam="DUF4096"
         /product="transposase"
         /translation="MRKKYPTDLSEREWARIEKHFRVSYKKGGRRPPKYSKREILEAIF
YVLRGTGCQWRYLPNDFPLWKTVYEQFRQWKKQGIFEKMNIEITKYSRRKIGRNEQPSA
CIVDSQSVKTTEKGGSKAMMEVKK"
         /besthit="qcoverage 100 , hcoverage 100 , similarity 100
, identity 100 , evalue 1.16e-87 , alnlength 126 ,
Bacteria , Proteobacteria , AOV87106.1 transposase
[Wolbachia endosymbiont of Drosophila incompta]"
gene     4583..6676
CDS      /locus_tag="wEsol_01631"
         4583..6676
         /locus_tag="wEsol_01631"
         /codon_start=1
         /transl_table=11
         /pfam="Resolvase Recombinase Zn_ribbon_recom Pfam-B_6319
Pfam-B_16865 MerR_1"
         /fullproduct="qcoverage 100 , hcoverage 100 , similarity
89.1 , identity 82.9 , evalue 0.0 , alnlength 697 ,
Bacteria , Proteobacteria , WP_110409269.1 recombinase
family protein [Wolbachia endosymbiont of Folsomia
candida]"
         /translation="MTAHKIQNHVSKLAYVYLRQSTMGQVRLNQESTERQYKLQDKA
QQLGWSQEAIKILDGDLGMSGTQANNREDFKMLVADVSMGKVGGVFVLEASRLSRSCS
DWHRLLELCALTDTLIIDEDGCYSPNNFNDQLLLGLKGTMSQAEHLFIRARLLGGKIN
KARKGELRFPLPVRFCYDDEGNTRFDDNEQVRSVVQLLFRVFREKGSAYGVVHHFGQN
KIQFPKRAYGGIWKGLIWGALTHSRVCAVLKNPCYAGVYVYGRYRQKKLSSTGQVQ
TTVVLLPMEVWHTMIKDHHEGYITWEEYIANKKILANNQTSREENMLPTAVREGLGLL
QGLLICGCCGRRLSIRYKKGNGILTVECNWKKKKGADSKSCFSVHGNPLDKAIAKRV
LEVMEPAQIEIAVKAFFEELEQRGNMLDKQWQMQUIKRADYEVQLAQRRYEEVDPSNRLV
AATLEKRWNEALIALEEAQNQYDEYKKKDVLVATKQQKEQVLALAQDLPRLWNAESTS
ARDRKRILRLLIKDITVEKLRNEQRAVLHIRWQTNATEDLEVQLPKKSYDRWRHSEGI
VNRIRQLSTMTDVQIINLLNQEGVTTNKGPNFTIKSIKWIRFKHKIPALCNQKSEEE
LSVKQVAEKFNVSFVRYWIEHKFINVRRIGPQFWISISPEQELELKKRVENS SKIA
IARLKSQKQIEGGVL"
         /product="recombinase family protein"
         /besthit="qcoverage 100 , hcoverage 100 , similarity 89.1
, identity 82.9 , evalue 0.0 , alnlength 697 , Bacteria ,
Proteobacteria , WP_110409269.1 recombinase family
protein [Wolbachia endosymbiont of Folsomia candida]"
gene     6666..7859
CDS      /locus_tag="wEsol_01632"
         6666..7859
         /locus_tag="wEsol_01632"
         /codon_start=1
         /transl_table=11
         /product="hypothetical protein"
         /pfam="RVT_1 GIIM"
         /translation="MYEEVIVPTIKDRAMQALYLFALEPIAETISDRHSYGFRPKRSC

```

```

ADATVACHLLLASRNQLQWILEGDIKGCDFNINHEWLMKHIPMEKKILHRWLKAGFLE
SKTLYPTTAGTPQGSIIISPILANFTLDGLEQLLESRFGLGSKRRGKIRSGVNVIRYA
DDFIISGFTHEVLENEVKPLVSSFLHERGLILSEEKTKITSITTGFDFLGCNVRRYNK
KLIKPSKESIKRLLNKARTLIKANIANTQAIVIKSLNSLLRGWGNYYHHVCAKKAFR
KIDNEIWHSLWKWAKKRHRPRKGLRWIKNRYFKVMGQRQWVFAAPICKNKPKEIRYLRL
LKLIDIPIRRHVKIRADANPLDLKWKKYFDERVKRTRMLASSFSREGSLLLVSPLRMM
FPEES"
/gene=7856..8674
/locus_tag="wEsol_01633"
CDS
7856..8674
/locus_tag="wEsol_01633"
/codon_start=1
/transl_table=11
/fullproduct="qcoverage 98.2367758186398 , hcoverage
75.7281553398058 , similarity 99.5 , identity 97.9 ,
evaluate 9.26e-280 , alnlength 390 , Bacteria ,
Proteobacteria , WP_155968541.1 MULTISPECIES: group II
intron reverse transcriptase/maturase [Wolbachia]"
/gene=7856..8674
/locus_tag="wEsol_01633"
/codon_start=1
/transl_table=11
/fullproduct="qcoverage 100 , hcoverage 100 , similarity
100 , identity 100 , evaluate 1.75e-165 , alnlength 272 ,
Bacteria , Proteobacteria , WP_213863500.1 Rpn family
recombination-promoting nuclease/putative transposase
[Wolbachia endosymbiont of Ceratitis capitata]"
/pfam="PDDEXK_2 Pfam-B_9730 Pfam-B_19397 Yael_N
Pfam-B_12519 Pfam-B_10245"
/tigr="TIGR01784 T_den_put_tspse 273 conserved
hypothetical protein"
/product="Rpn family
recombination-promoting nuclease/putative transposase"
/translation="MKDKPVLEKKNLDKGLKRSVGKPACCVSKGGGSSNTASLPDQVA
KTKGFEEKRAQYYAAKAYSQRQADKGDQYHDLKEIIFIAIADCILFPDKSEYKSKHTIRD
EETNEHDLKDFYFIFIELPKFPKTKEDQLASIVEKWVYFFRYADETSEEELERIIGSD
LIIKRAYEELNRFNWSEKEFIAYEQEIKRILDEKAILAQKLDDATQKGRQEGREEGIQ
IGHEKGRAEGREEGEKQAKIAVAKKLLKAGVSTDIISQTTGFSHSEILQLKEKT"
/gene=7856..8674
/locus_tag="wEsol_01633"
/codon_start=1
/transl_table=11
/fullproduct="qcoverage 100 , hcoverage 100 , similarity 100
, identity 100 , evaluate 1.75e-165 , alnlength 272 ,
Bacteria , Proteobacteria , WP_213863500.1 Rpn family
recombination-promoting nuclease/putative transposase
[Wolbachia endosymbiont of Ceratitis capitata]"
/gene=7856..8674
/locus_tag="wEsol_01634"
CDS
7856..8674
/locus_tag="wEsol_01634"
/codon_start=1
/transl_table=11
/product="hypothetical protein"
/translation="MPNSGKFTIEFKVKVMELAKIIRYTSSSKFDGSNTNMNEVGIQD"
/gene=7856..8674
/locus_tag="wEsol_01635"
CDS
7856..8674
/locus_tag="wEsol_01635"
/codon_start=1
/transl_table=11
/product="hypothetical protein"
/translation="MSRKPLAIDSSNQPEIATSSAIKPSSWINDLFDWVKGSVGGLLN
SKPTLSRETSSSTSSPILQVDAKMDVNGTIMLLDVLIRKVTGQKYISTVDQSISPLEAQ
GYTLNITKGFEKVVEQAGLKSGVSMHRLNIDFVEIQKEVTGKIMSGKFNEISGVLRSY
VEKACPGREAGCPGKLSPKKFDKFMTIFDNKLDIALNQSIQQILHGGDGKLEVRGAEK
QQMSLEPQSYLSNASIQNHSKVSTCLSDVGVTKLGNTLSK"
/gene=7856..8674
/locus_tag="wEsol_01635"
/codon_start=1
/transl_table=11
/fullproduct="qcoverage 100 , hcoverage 7.74542179525668 ,

```

similarity 100 , identity 100 , evalue 7.27e-158 ,  
alnlength 258 , Bacteria , Proteobacteria ,  
WP\_213863501.1 ankyrin repeat domain-containing protein  
[Wolbachia endosymbiont of Ceratitidis capitata]"

gene complement(9774..19028)  
/locus\_tag="wEsol\_01636"

CDS complement(9774..19028)  
/locus\_tag="wEsol\_01636"  
/codon\_start=1  
/transl\_table=11  
/pfam="Peptidase\_C48 Ank\_2 Ank Ank\_2 Ank\_4 Ank\_5  
Pfam-B\_10896 Ank Ank\_3 Ank\_4 Ank Ank\_2 Ank\_4 Ank\_5 Ank  
Ank\_3 Pfam-B\_1714 Ank\_4 Ank\_2 Ank\_4 Ank\_5 Ank Ank\_3 Ank\_4  
Pfam-B\_1714 Ank\_5 Ank Ank\_4 Ank\_3 Ank\_5 Ank Ank\_3 Ank\_4  
Ank\_2"

/fullproduct="qcoverage 98.9299610894942 , hcoverage  
91.5941158811168 , similarity 100.0 , identity 99.9 ,  
evalue 0.0 , alnlength 3051 , Bacteria , Proteobacteria ,  
WP\_213863501.1 ankyrin repeat domain-containing protein  
[Wolbachia endosymbiont of Ceratitidis capitata]"  
/translation="MVDDNQQQEKPDQFELIELLFGKVGSSSDAADLLDKSFEARYQ  
SLVDQIQSYLHSSEKPGFFPHRFLGFFSSVLDTKLNDKLGIKKLHFRFEGARTLKIVA  
ETESKIHVFIFTEDIEAQHSKPSDVHTRRFEFTKDEFKSVIGKDYTELDAKRLQIDVI  
KILKDKYELVKS PKSDKDVKS KKL YLYLKRDDVLEYKTKNVYGNVKTIEISRDLQKG  
KVFDEVEQFLGKQKDLSDNARKELSRMTSEKGYTLKSNGENKKINIKVESKKKIKDV  
PILPSIEFQEVVKLGKSIYLESYIEKLANPD AEIDQVQENLKAILNYIKKVHTNLNL  
QNNVYGIKAREAGQHGFVAGMFDNFRYRDNTKLYLEQFAGGGYADIVLLVRGP NRAVD  
SVPILIELKAGTVGEVTPNDALKQAEGYIEGFRPNKMRVLTNADNAI AVGLNLDYTES  
FKTEVKPIKQPPVPLMEDFVKLAHRWNNQQI SEEDFKREIADLLSSEYHTFPANKETK  
DHYFFSRDILGQSILINKIGQDQSNIKKYIYSYDEYPLNWPQGTEYTL SKSPIMTLIL  
VQGNQGEKIAFIFHIRESENTKEFYADKKIPVLNIPEIGRIGNVIEIKMSLKKYEAGL  
FFEDDLFKIEQISKYKPSGADQKFTGSFLKIPDSNELKVKLDQAITSQHVS DSKVSLQ  
AYKVLLSEVADAVYPIKDLITNEARLQAVLNGLFSSYSDLKLQETS AKTII IPEFQVG  
AGGRVDMVIQGIGPSPQGTKEYTSIALEFKLIDKNLDKGGMKKEVDKLTKEQNVRYSK  
GAALKAITDSKMF FMGVVVNVKAQNKDSLILTSDELISAKVSHSSIDVVKEKHLKDI  
KQLIQRLKSTTIKETLESATIEKDYHYWLQQHDIADIARVQYGYRNDGTDMLFEIVGS  
PEHIASQLQQFQNSVRGGEKRPLTLIVNLNNNHVWTLVISYQNGQYSGYYVDSLGNNI  
PGNIRQVLQRAQIAVNDVSVAQQIDGHNCGLWALENARDINTVLQGSRRNNVLDEIRNH  
LQVRERNEDHFVRSREYISNLSMDPQRIANLEAILSETQQSRKKLNQNTKNSNPNS  
CAKQGGRSKRSTNPCLFSKDDVEKFSKGKVDENNVDKIIIDSEKFLTYLKNSQDETKN  
AQLIEFVGDKNIEGDRKYL LDKVVG DQGYERYVQNERVKNLHGDISQQASSATKGSKL  
KGRMLNAAGGIQLIRGIHGAIVSCKDGTATDCGLNLGGIGWSFTSQPIESAMVKITPK  
VIASAERVMGKIVPGTLGKQTKFAVQIAGVKFGSTIAKGTAGAIAGVFDIVEIGMSAS  
NLVDCKKKENSNDPCGEKEIRDNIASVSFSSASFVSGVALTAAGMPVIGIAGVGFLMV  
GYGIYSGVSNIVEYEKKYDTHGENWSIFWRTLLFQPM AADVQHLVARKETVNSLAKE  
VWQALNNGPNSV VAYGVGLGKINGDTIRPDYAIIMNRTNANTENLSRVI PDHIKGAN  
RICLPQITEQDYEKGIKSSILSAKYCDNAMVISHDNRVKQKQDKTIVYDLQNVSEG  
TIIGHNKWNNNFLIYPGT EIVGGNNVANRFVLVNNSSFLGKIIIGGSNSANILDLSQL  
VEDKVTGVIDYRFKPSAYGRLNVKINNRL LIDDYVSNNFLSYHYIARQSKVDEILCMG  
YSEHFIGNDDRKVI VDSGGGF DNKKDVVENCKKVIISP YTTVKGGKSNYTFYVKTAD  
YKGKGLYSEIDVDGIGTIIIFPEIDLLGDCDQITYSTSSNTLSLKINFGQNNQFTLDIK  
NYVEQSSNKPHFALIDKNGSNIVPKIERSDSSTIEITSFELHSEHPLDSLNAVENHYK  
KILNNGKNYKVF SVIRGKTQGQDNNIVPHMAFGSSGDDVINFDQGTIFARGGRGSDVY  
VIANGIGNKEIQIDNYS DDEKADTLFMPEVKKDFLVQQCNLHLNYNNTSIQVKNYLQD  
HNHRHLIIMNKKGETFTPNIQLMSCSPSYSGEGKLV PFLQATQTQSMFLLSKDFQGDH  
VVIDSRLEDIEKYKDQDDLLIRERGT PFIVRIEGFYTDQSKWKNISYSLWENN DLF  
SPELLGNVDNVM EYKDKLRGDYKRIVKEYVEDFSNPTTVIQHNQKLEKNISTAVGQDE  
ERIGVMILKNISPGQVEVFSSADLIFRDKRSNHTVNIKGWNNNSKSYRISTLEFDLGL  
EPVTIRRLDRFSLSEVGKIQDLIGKASENYQNRDKYTPKTENDFKCLISIDSFESENR  
NPTYQCLGFSSLDQDISFTEDSCSLEQLSEFGNKLNV TQISALSRTLQNNLLLSGYGQ

DIINQCSKLMTEVGNQQSKIFSMVKDVEESTFLGQSENKLDLGRCLSERKKRSSDLCTV  
FLENMRNELNREESSIRVITSGYETLDIENLPPIREVVMNDYVNGKKSRLSTLYLRE  
LVEQIDEDLGKIPVSMVIKDESDLLIKLYISATGLQQDIITVRLKDALVNKWKYKLQI  
IFNNALMEIGDGLDLEPSLFVSDKKITLVRPQDVEERNKIIVSKRAGHYTYLHDKYDL  
IVTNAFDAKIEANELCVIRFKDFYKEPKMKTLSIRFADKEILLNNEIDKIYNSESAEK  
LNYVSSVLNLQKSPLPLEANVNITDVEILKQKLDLYRQLLTAVQNRDLNLIKDLISKG  
ADIDVKDNSGRTPEDEERYTNSDTMRQVFMQAHLDKELLLTVKNEKDLKTISDLIAKD  
IDDRTHGGFYTWSGNLDTFEFLVSTDVSVNATDKYGCTLLHWAALKGHSDIAKFLVD  
KEANVNAKDILGRTPIHFAVMNNHKDIQDVYGRGSTYTSTAESSDEEVIQLFLMRGASI  
NEADKNGETPLHLASWGGHLDLTLQHLLINNGANISTKDSSGKTPLDIARDKGHNVLVQC  
LQQTQLILDKQLLSAIGNSDLNKKVRLVAQGANIDTNNKNGNTLLYSAAEIGDLNLVK  
LLLDNGANIEAKNGEYQATPLHGAVERNIRIDVVKLLLNRGANVNAEDKDNWTPHLYAA  
DTNSLDIAKVLVDAHANLGAKGNYGKTPLDIAKDKGHNNIVEYLEKKVQGRKRRTFTT  
QTPSSSWRSCSSSYVKKTTTCYRFK"

/product="ankyrin repeat domain-containing protein"

/besthit="qcoverage 98.9299610894942 , hcoverage 91.5941158811168 , similarity 100.0 , identity 99.9 ,  
eval 0.0 , alnlength 3051 , Bacteria , Proteobacteria ,  
WP\_213863501.1 ankyrin repeat domain-containing protein  
[Wolbachia endosymbiont of Ceratitis capitata]"

gene complement(19206..>19308)

/locus\_tag="wEsol\_01637"

CDS complement(19206..>19308)

/locus\_tag="wEsol\_01637"

/codon\_start=1

/transl\_table=11

/product="hypothetical protein"

/translation="LSQEQMYSIMEEDKSEYELFMRVRKHAVGSWGR"

#### ORIGIN

```
1  ttgtgcatga aattgctaaa ccacttcaga aacaggaaac atcttttgca aaacaagttg
61  aagaaagcag aaacgcagat tcacaaaagg gtcgatctgt gtagatttct ccttgtaata
121 atctttcgat tctactgtct gttaattcaa attaggggta taaaatttta gaagccagct
181 cttatataac caatttatag caagaaatta cgatacaaaa atcagcgtcc gttagaaaat
241 aaacataaca caggggtgata gagttgcccc tatccataag cgtcagttaa gtcacaaaatt
301 gtaagcttaa aatatggttg aataattatt aataatagta tataattatt aacgtttttc
361 aggcattttt gttatgggtg cgccaagtaa gcgttttagaa tacaattggg gaaaatccaa
421 ctgaccttac ccagaaaaag tggagagaaa gtgtggaatg ttttttaca aaagaatgat
481 gcatcaaatt gttctggaat gcaatagtta atagtgcagt tgtttgttat aaaaaatttc
541 tatgtattca aatattgcag ttctagtttg ttgagcagag tgttgtgaag tatcaataag
601 tatttctctt ttcaatgagc taaagaagct ttctgcaaca gaattgtcgt aacaacagcc
661 ttattactc atctatattc ttacagcta agagatattg atacccttgc gcagtatatt
721 gtgaaccttg gtcactgtgt cagcagtaga tttttggcag gtttacgctt gttaacgtcc
781 attaataaag agttcataac caattgttta ttattgcac tactcattaa ctaccatacg
841 tgagaattat tgctgccaaa tatagccatc cctccttggt tttgatgtaa gtaatcccat
901 actttatttg gttgatcaac aataaagttt tgatctagta tattgggagc tacagctcta
961 ttatctgttt gttgtttttt aattttaaac tttcttctca gtatagccct gatgtcattt
1021 ttctgcataa tactttgcac cgttttcaaa ttgcaacttt taccacaaagc cttcaattca
1081 gcatgaattt taggagctcc atatctacat ttagaagctt gatataattt ttgaatatct
1141 gctaataact ctttatttgc tgattctcta ctgcttattt ttcttgtggg ccacttatag
1201 tagccactag cagaaaatcc tacataattc ctgtacttta tagcagttac tatataaaaa
1261 aatattttac tctttttgac tggccagggc ttttttttaa atgtctcttt cccttgttac
1321 tcttgctttg taaatcaaac ctctctttgt cgtaaggagc catgttacct ctacctggaa
1381 atgcatctgc tgccgacttt ttttcgttgt gtttctttat ccattttcct aataaaccac
1441 cttttattcc taaatctctt gctatttttg taattgtttg acctgccttt ctttgttcat
1501 ttgccagttt aacagcttcc aatttgaatt ctgccgtata ttctcttacc atttctaadc
1561 ctccaaaatt ttattttacc caaaaaact cttttctttc tctccacttt ttctgggtaa
1621 ggtcagtcct taggcaccca aacaaaggga aatgctggat aaaaagaaag tactttaaga
1681 agtataataa cgaaaactgg cgctttatga caagtaacaa ggtacgtctt actatacaca
1741 gcgatcatgt tattaacaaa agtgcaaaaa accagatccc catatgatgg tgattgggta
```

|      |             |             |             |            |            |             |
|------|-------------|-------------|-------------|------------|------------|-------------|
| 1801 | tattgggggta | aacgtctgag  | aaaaatacca  | gataagccac | taggagtaat | aaaattattg  |
| 1861 | aggttgcacc  | aaagtaaatg  | cgataattgt  | agactatggt | ttaaaagtga | tgatacaata  |
| 1921 | aaaatacatc  | acaaagacca  | gaatagacga  | aacaatatga | tcacaaactt | atctttgtta  |
| 1981 | catggacatt  | gtcacgatga  | attacacagg  | aggtgtgcat | gaaaagcacc | aaattagaga  |
| 2041 | gaagccgtat  | gaggctcaaa  | gtctcacgta  | cggttttgaa | gtcgagtga  | gaggggcgac  |
| 2101 | cttcttcact  | tagacaacaa  | tatgcagatg  | aaactacgga | agaagactta | aggaaaatag  |
| 2161 | cagaaaaagc  | accaataata  | aagttagtct  | acgatgaatt | agacaggttt | agctggaatg  |
| 2221 | aaaaagattt  | agtagcatat  | gaagaaagaa  | taatggatct | gctgaaagaa | gaaggcatcc  |
| 2281 | tcgctaaaaa  | acttgatgag  | ggaaagattg  | aaggaaagat | tgaagtagca | aaaaacctac  |
| 2341 | ttaaggctga  | catctctatt  | gatattatct  | ctcagacaac | cggccttcct | caagctgaga  |
| 2401 | ttaaacgact  | tcaggaagaa  | atcacctaaa  | aggctaata  | tcaacgaaaa | aattgtaaga  |
| 2461 | gagaacttaa  | aaaaagtcac  | agagcaaaaa  | agcggtaaag | atgtgatcgc | tcttggcata  |
| 2521 | atatcctcaa  | ttattattaa  | aggtcaagat  | gttgggtttt | tgcttgaagt | tgccggtaac  |
| 2581 | acgcaagcaa  | atgaagaatt  | aagaagaaat  | tgtgagcaag | ctgttaaagc | tataccgggg  |
| 2641 | gtgacaaaag  | tgaccgtggt  | tgctacttgt  | caaaaacaaa | ctgggcaaca | aaaagctaaa  |
| 2701 | ttacatatcg  | aaggagtga   | aaatataatc  | gttgtggcct | ctggtaaagg | cgggtgtgggc |
| 2761 | aagtccacag  | ttgcgctaaa  | tcttgctctc  | tcattagcaa | agttaaaaca | caaagttgcg  |
| 2821 | ctggttgatg  | cagatatata  | tggtccttca  | attcctaaaa | tgcttggcgc | tgaaaaatta  |
| 2881 | aagccagaaa  | tacaggatag  | taaagcaatg  | cctatagaaa | agtatggact | gcatactatt  |
| 2941 | tcaattggct  | attttatcga  | taaagatcgt  | gcagcaatat | ggcgcggaac | tatgattaca  |
| 3001 | aaagcacttt  | atagtctgct  | aatgggaaca  | aaatggtccg | atatagagta | tttgataatt  |
| 3061 | gatacaccac  | ctggaactgg  | cgatgtgcat  | ttaagtctta | tggaaaattt | taacttaact  |
| 3121 | ggggcgataa  | tagtttcaac  | tccacaggag  | ctctctttaa | tcgatgctcg | caaaatttat  |
| 3181 | gatatgttta  | caaagctcag  | cgtaccggtt  | attggcattg | tagaaaatat | gagttatttc  |
| 3241 | attcaaagcg  | gctcaaaaat  | atacatattt  | ggaaaagacg | gtgcaaaaaa | aatgtctgag  |
| 3301 | gagctgggca  | tcaaacttct  | aggcagagtt  | cctctagatc | cacaaatatg | ccatgcttct  |
| 3361 | gattgtggaa  | atcctttaat  | gttaagtga   | gatttagcag | ggatttatga | agacattgct  |
| 3421 | caaagtatag  | ttaaacaata  | gaataagcgt  | gagaaacatg | cgaatcaaag | tcctcttttg  |
| 3481 | ttagttacaa  | aatagactgc  | ttgcataacc  | attatttaca | tgaaaaatta | gcagcttttg  |
| 3541 | tcattccagc  | gcgtgacgct  | ggaatccaga  | aaaaaagaag | aatggatccc | agtgggcttt  |
| 3601 | gttgcatcgc  | tcttcggata  | gtagaggttg  | tccggaaact | agtaaattca | agcatattcc  |
| 3661 | ctctttaaca  | taaccctact  | catagctagg  | tatatgaaat | tctcagtggg | tgttgtgagt  |
| 3721 | aaatcatact  | ccttcgatag  | ccttctattc  | ctattaaccc | aagcaaaagt | cctttctaca  |
| 3781 | acccatcttc  | ttggctgtac  | tttaaaccct  | tgttctcttg | ttggtagtag | ctcagggtggc |
| 3841 | gtatctttgt  | gcacccaaaa  | tctacatgga  | ggccttttaa | caatttcaat | atctatgtca  |
| 3901 | tattcttcct  | ttatgtgatt  | ctttaaattt  | cttccttggt | atcccatgtc | agccacattt  |
| 3961 | tttttaactt  | tagtatattt  | tgttctcata  | ttgtttaatg | ctattttaat | accatctcta  |
| 4021 | tcattttcgt  | tagcagcgcc  | tacgtaacaa  | cctagtataa | aaccctgagt | gtctgttaatt |
| 4081 | atatgccttt  | ttctaccctt  | tactttttta  | cttccatcat | agcctttgat | cccccttttt  |
| 4141 | ctgtagtctt  | tacagattga  | ctatctacta  | tacaggcact | cggctgctca | ttccttccta  |
| 4201 | tttttcttct  | actatatattt | gtaatttcat  | aattcatttt | ctcaaaaatt | ccctgcttct  |
| 4261 | tccattgcct  | gaactgctca  | tacacagtct  | tccatagcgg | aaaatcattt | ggtaaatacc  |
| 4321 | gccattgaca  | ccctgtacgc  | aatacataga  | aaattgcttc | taatatttct | cttttgctat  |
| 4381 | actttggcgg  | ccttcctcct  | ttcttgatag  | atactctgaa | gtgtttttct | attcttgccc  |
| 4441 | attccctttc  | gcttagatct  | gttgataact  | tttttctcat | ctttaccccg | tactaaaatt  |
| 4501 | tcagatatta  | tagcctttta  | cttatttccg  | gacaacctct | taatagcaga | acaacaatcg  |
| 4561 | ataaaaacgg  | aggataacag  | taatgacagc  | acacaagatt | cagaatcatc | atgtatcaaa  |
| 4621 | actagcctat  | gtttatctga  | gacaatcgac  | aatgggacag | gtaagattaa | atcaggagag  |
| 4681 | taccgagagg  | caatataaac  | tgcaagacaa  | agctcaacaa | ttgggggtgg | cacaggaagc  |
| 4741 | aatcaaaaatt | ttagacggtg  | atttaggaat  | gtcggggacc | caagctaata | acagagagga  |
| 4801 | ctttaaaatg  | ctagttgcag  | atgtgtcaat  | gggaaaagta | gggggagtat | ttgtactaga  |
| 4861 | agcatcacga  | ttatctagat  | cttgtagcga  | ttggcacaga | ttgctggaat | tatgcgcttt  |
| 4921 | aaccgataca  | ctaattatcg  | atgaagatgg  | ttgttatagt | cctaataatt | tcaacgacca  |
| 4981 | attgctgcta  | gggttaaaaag | gaacgatgtc  | acaagcagag | ttgcacttta | tccgtgctag  |
| 5041 | acttttgga   | ggtaagataa  | ataaggctag  | gaaaggagag | cttcggtttc | ctctaccagt  |
| 5101 | aagattttgt  | tatgatgatg  | aaggcaatac  | tagatttgat | gataacgagc | aagtaaggag  |
| 5161 | tgtagttcaa  | ttattattta  | gggtattttag | agaaaaaggc | agtgccttat | gagtggttca  |
| 5221 | ccattttggc  | caaaaacaaaa | tacaatttcc  | aaaacgggca | tacggtggta | tttgaaaagg  |
| 5281 | gaagctgata  | tggggagcat  | taacacattc  | tagagtatgt | gcagtattaa | agaatccttg  |
| 5341 | ttatgctgga  | gtttatgttt  | atggccgtta  | cagatatcag | aaaaaattat | cgagtactgg  |

|      |             |             |             |             |             |             |
|------|-------------|-------------|-------------|-------------|-------------|-------------|
| 5401 | acaggtccaa  | acaacagtag  | ttctcctacc  | aatggaagtc  | tggcatacaa  | tgataaaaga  |
| 5461 | ccaccacgaa  | ggttacataa  | catgggaaga  | atatatagca  | aacaaaaaga  | tttttagcaaa |
| 5521 | taatcaaacc  | agtagagaag  | agaacatgct  | acctacagca  | gtacgagaag  | gattgggatt  |
| 5581 | attgcagggg  | ttattgattt  | gtggttggtg  | tggccgccgc  | cttagtataa  | ggtataaagg  |
| 5641 | aaaaaatggt  | attcttactg  | tctatgaatg  | taattggaaa  | aagaagtggg  | gagcagatag  |
| 5701 | taaaagctgt  | ttttctgttc  | atggaaatcc  | tttggataaa  | gctattgcaa  | aaagagtatt  |
| 5761 | agaagtcatg  | gaacctgctg  | aaattgaaat  | tgccgtaaaa  | gcatttgaag  | aactggaaca  |
| 5821 | acgaggtaac  | atgcttgaca  | agcaatggca  | aatgcaaata  | aaaagagcag  | attatgaagt  |
| 5881 | acaattggca  | cagagacggt  | atgaagaagt  | agatccatcg  | aatcgcctag  | tagctgcaac  |
| 5941 | tttggagaag  | cgttggaacg  | aagctctaata | agcattagaa  | gaagcacaga  | atcaatatga  |
| 6001 | tgaatataag  | aaaaaggacg  | tacttgtagc  | tacaaaacaa  | caaaaggagc  | aagtgttggc  |
| 6061 | actcgctcaa  | gacttaccac  | gcttggtgaa  | tgcagagtca  | acgagtgcaa  | gagatcgaaa  |
| 6121 | gcgtatttta  | cgacttctaa  | tcaaagatat  | cactgttgaa  | aaactacgta  | atgaacaaag  |
| 6181 | agcagtgcta  | catatacggt  | ggcaaacaaa  | tgctacagag  | gacttagaag  | tgcaattacc  |
| 6241 | aaaaaaatct  | tatgacagat  | ggcggcattc  | agaggggtata | gttaatcgga  | taagacagct  |
| 6301 | atcaacaaca  | atgactgatg  | tgcaaattat  | taatctatta  | aaccaagagg  | gagttacaac  |
| 6361 | aaataaaggc  | aacccattta  | ctataaaaag  | tataaaatgg  | attcgattta  | aacataagat  |
| 6421 | tccagcacta  | tgtaatcaaa  | aatctgaaga  | agagttatca  | gtgaagcaag  | ttgcagaaaa  |
| 6481 | attcaatggt  | agtcattacg  | tagtacgtta  | ttggattgaa  | cataagttta  | ttaatgtacg  |
| 6541 | gcgtattggg  | ccacaattct  | ggatatctat  | cagtcagaa   | caagaactag  | agttaaaaaa  |
| 6601 | gcgtgttgag  | aactcttcta  | aaatagcaat  | tgcaagatta  | aaatcacaaa  | aacaaattga  |
| 6661 | aggaggtgta  | ttatgaagtc  | attgtgcca   | cgataaaaaga | tagagccatg  | caagcattat  |
| 6721 | atctgtttgc  | tctggaaccg  | atagctgaaa  | cgatcagtga  | tcgtcactcc  | tatggcttta  |
| 6781 | gacctaaaag  | atcctgcgca  | gacgctactg  | tggcttgcca  | cttattactg  | gcaagtcgta  |
| 6841 | atcaactaca  | atggatactc  | gaaggtgata  | tcaaagggtg  | ttttgataac  | attaaccatg  |
| 6901 | aatggctcat  | gaagcatatt  | cctatggaga  | agaaaattct  | tcatagatgg  | ttaaaagctg  |
| 6961 | gtttcctaga  | atcgaaaact  | ctgtatccca  | caactgctgg  | cactccgcaa  | ggaagtataa  |
| 7021 | tttctccaat  | actagctaac  | tttaccttag  | atggctctga  | acagttatta  | gaaagtcgct  |
| 7081 | ttggtaaatt  | aggtagcaaa  | agaagaggaa  | aaatcagaag  | tggagtgaat  | gtaatcaggt  |
| 7141 | acgcagacga  | ctttattatt  | tcaggtttca  | cacatgaagt  | actggaaaat  | gaagttaagc  |
| 7201 | ctttagtatc  | atcttttctt  | catgagcgag  | gtttaattct  | atcagaagag  | aagacaaaaga |
| 7261 | ttacatctat  | cacaacaggg  | tttgactttc  | ttggttgtaa  | tgtacgtaga  | tataataaga  |
| 7321 | agttaattat  | taaaccttcg  | aaagaaaagta | ttaaaagact  | tctgaataaa  | gcacgtacat  |
| 7381 | tgataaaaagc | aaatatagcg  | aacactcagg  | ctatagtaat  | taagtcactc  | aattctctac  |
| 7441 | tgagaggatg  | gggaaattac  | tatcaccatg  | tgtgtgctaa  | aaaagcgttt  | agaaagatcg  |
| 7501 | acaatgaaat  | ttggcatagt  | ttatggaaat  | gggcaaagaa  | aagacatcct  | cgtaaaggat  |
| 7561 | tacgttggat  | aaagaatcgt  | tacttcaaag  | taatgggtca  | acgccaatgg  | gttttttgctg |
| 7621 | cacccatatg  | caagaacaaa  | ccaaaagaga  | tacggtatth  | aagactgctt  | aagctgattg  |
| 7681 | atatacctat  | cagacgacat  | gttaaaaatca | gagcggatgc  | aaatcccctt  | gacttaaaat  |
| 7741 | ggaaaaagta  | ttttgatgag  | agagtaaaac  | gaacaagaat  | gttagcaagc  | tcttttctcaa |
| 7801 | gagaagggttc | tctactgttg  | gtgtcaccat  | taagaatgat  | gtttcctgag  | gaatcatgaa  |
| 7861 | ggacaagccg  | gttctagaaa  | agaagaactt  | agataagggg  | ctcaagcgta  | gtgttgggaa  |
| 7921 | acctgcatgc  | tgcgtttcta  | agggaggggg  | tagtagtaat  | actgcttcct  | tacctgacca  |
| 7981 | ggtcgctaaa  | actaagggct  | ttgaaaaacg  | tgcccataac  | tatgctgcta  | aagcctattc  |
| 8041 | aagacaagct  | gataaagggtg | atcaatacca  | tgatcttaaa  | gaaattatct  | ttattgctat  |
| 8101 | agcagattgt  | atthttatttc | ctgataagtc  | tgagtataag  | tcaaagcata  | ctattcgaga  |
| 8161 | tgaagagact  | aacgaacatg  | atctaaaaga  | tttttacttt  | atattttattg | agttgcctaa  |
| 8221 | atthccaaaa  | actaaagaag  | atcagcttgc  | aagtatagtt  | gaaaaatggg  | tctacttctt  |
| 8281 | tagatatgca  | gacgaaacta  | gtgaagaaga  | gctagagaga  | ataataggaa  | gtgatctaata |
| 8341 | aattaaaaga  | gcatatgaag  | aactaaatag  | gttcaactgg  | tcagaaaaag  | aatttattgc  |
| 8401 | ctatgaacaa  | gaaattaagc  | gtattcttga  | tgaaaaggct  | atcctcgctc  | aaaaactcga  |
| 8461 | tgatgctact  | caaaaaggta  | gacaagaagg  | tagagaagaa  | ggcatccaaa  | tcggccatga  |
| 8521 | aaaaggtaga  | gcggaaggca  | gggaagaggg  | cgaaaaacag  | gctaaaaatag | ctgtggcaaa  |
| 8581 | aaaactactt  | aaagcaggtg  | tctctactga  | tatcatatca  | caaactacag  | gttttttctca |
| 8641 | ttctgaaatt  | ttgcaactca  | aggaaaaaac  | ataatattht  | taacttatga  | aaacctctcc  |
| 8701 | taagtttagac | atatccccta  | attaagagtc  | taatgaactg  | tctaaaaatag | ctataaagat  |
| 8761 | tgcacataga  | attacataga  | ttactaccat  | gactaatcct  | cctatttcagc | cttccatattc |
| 8821 | aaagatacat  | actgtaagtt  | taatattgat  | agtacattaa  | ccacttattc  | cccaactcta  |
| 8881 | gtcttgtatt  | cctacttcat  | tcatgttagt  | attagaacca  | tcaaacttgc  | tactggtata  |
| 8941 | cctaattatt  | ttggctaatt  | ccatcacctt  | cactthtaaac | tctattgtaa  | actthccact  |

|       |             |             |             |             |             |             |
|-------|-------------|-------------|-------------|-------------|-------------|-------------|
| 9001  | atttggcata  | ttatatcttc  | catattctca  | tctacttact  | caaagtat    | ccaagcttgg  |
| 9061  | ttactcctac  | atcagaaaga  | caagttgata  | cttttgaatg  | gttttgaatt  | gaagcattac  |
| 9121  | ttaaataact  | ttgaggctcc  | aagctcattt  | gctgtttttc  | tgcaccacga  | acctctaatt  |
| 9181  | taccatctcc  | accgtgtaat  | atctgttgta  | ttgattgatt  | tagtgctata  | tctagtttgt  |
| 9241  | tatcaaatat  | agtcataaac  | ttgtcaaatt  | tctttggact  | taacttacca  | ggacatcctg  |
| 9301  | cttctctacc  | aggacatgct  | ttctctacgt  | atgagcgtaa  | aacccttgaa  | atctcattaa  |
| 9361  | atttaccact  | catgattttt  | cctgtaactt  | ctttctgtat  | ttccacaaaa  | tcaatattta  |
| 9421  | atcgatgcat  | tgatacacca  | ctttttaatc  | cagcctgctc  | tactactttc  | tcaaatccct  |
| 9481  | ttgtaatat   | gagtgatat   | ccctgtgcct  | ctagtggaga  | tatagactga  | tctactgtag  |
| 9541  | aaatatactt  | ttgaccctg   | acctttctaa  | tcagcacatc  | aagtaacatt  | attgtaccat  |
| 9601  | ttacatccat  | ttttgcatca  | acttgtaaga  | ttggacttga  | agtgccttgat | gtttccctag  |
| 9661  | ataatgtagg  | tttagaattt  | aataatccac  | ctacagagcc  | ttttacccaa  | tcaaataaat  |
| 9721  | catttatcca  | ggaagatggt  | tttattgcac  | tgcttggtgc  | tatttcaggt  | tgattacttg  |
| 9781  | aatctatagc  | aagtggtttt  | cttgacatat  | gatgacgagc  | atgatctcca  | tgatgatgac  |
| 9841  | ggcgtttgcg  | ttgtaaaggt  | tctcctcttt  | cttccctgaa  | cttttttttc  | taagtattcc  |
| 9901  | acaatattat  | tgtgcccctt  | atcttttagca | atatctagcg  | gtgtttttacc | gtaattacct  |
| 9961  | ttagcaccaa  | gattagcatg  | agcatcgaca  | agaacttttg  | ctatatcaag  | actgttggtg  |
| 10021 | tcagcagcat  | aatgtaaagg  | tgtccaattg  | tctttgtctt  | cagcggttaac | atttgcacca  |
| 10081 | cgattaagaa  | gtaatttgac  | tacatctatc  | ctgtagtttt  | caaccgctcc  | atgcaatgga  |
| 10141 | gttgccctgat | attccccgtt  | tttagcttca  | atattagcac  | cgttatcaag  | aagaagttaa  |
| 10201 | actaggttta  | aatcaccgat  | ttcagcagct  | gaatacagta  | gtgtattacc  | gttcttggtg  |
| 10261 | ttggtatcaa  | tgtagcacc   | ctgagcaaca  | agacctctaa  | ctttattaag  | atcactat    |
| 10321 | cctattgcgc  | ttaataactg  | tttatctagg  | attaattgtg  | tttggtgtgaa | gcactgtaca  |
| 10381 | agattattat  | gtccccttatc | tctagcaata  | tctagtgggtg | ttttgccact  | actatcttta  |
| 10441 | gtactaatat  | tagctccatt  | atttataaga  | tgctgcaatg  | tatctaaatg  | accaccccaa  |
| 10501 | gaagccaagt  | gtagtggcgt  | ctcgccattt  | ttatcagctt  | cattaatact  | tgctcctctc  |
| 10561 | atgagaaaaa  | gttggtataac | ctcttcatca  | ctgctctcag  | cagtagtgta  | tgtagaacct  |
| 10621 | ctaccatata  | catcttgaat  | atccttgtga  | ttattcataa  | cagcaaagtg  | aataggagtc  |
| 10681 | ctgccaaagta | tatccttagc  | attcacatta  | gcttccttat  | caactaaaaa  | cttagcaata  |
| 10741 | tctgaatgac  | ctttcaatgc  | agcccagtg   | agtaatgtgc  | agccatattt  | atcagtcgca  |
| 10801 | ttaacactca  | catctgtact  | aacaagaaac  | tcgactgtgt  | ctaagttacc  | actccaagta  |
| 10861 | taataaaaacc | cgccatgcgt  | tctgtcgtca  | atatctttcg  | caataagatc  | actaattgtc  |
| 10921 | tttagatctt  | tttcattttt  | tacagtaagt  | aacaattctt  | tatctaagt   | tgcttgcata  |
| 10981 | aaaacttgcc  | tcattgtatc  | agaattagta  | taacgttcct  | catcttcagg  | agttctacca  |
| 11041 | ctgttatctt  | taacatcaat  | atcagcgcct  | ttacttataa  | gatctttaat  | tttattaaga  |
| 11101 | tcacgatttt  | gtactgcagt  | taacaactgt  | ctatatagat  | ctaatttttg  | ctttaaaatt  |
| 11161 | tctacatctg  | taatattgac  | attagcttcc  | aaaggtaaag  | gacttttctg  | taaattaaga  |
| 11221 | acagaactaa  | cataatttaa  | cttctcagca  | ctttctgagt  | tgtatatattt | atctatttctg |
| 11281 | ttattttaata | atatttcttt  | gtcagcaaac  | cttatagata  | aagttttcat  | tttaggctct  |
| 11341 | ttatagaaat  | ctttaaaacg  | tataacacat  | aactcgtttg  | cttctatttt  | agcatcaaag  |
| 11401 | gcatttgtaa  | ctattaagtc  | atacttatca  | tgaagataag  | tataatgccc  | tgctctttta  |
| 11461 | gatacaatta  | tcttattcct  | ttcttctacg  | tcttgagggtc | ttactaaagt  | aatttttttg  |
| 11521 | tcagaaacaa  | agagtgaagg  | ctccaaatct  | aagccatcac  | ctatttccat  | cagtgcatta  |
| 11581 | ttaaaaataa  | tttgtaattt  | cttataccac  | ttattttacaa | gtgcatcttt  | gagcctaact  |
| 11641 | gttattatat  | cttgctgcaa  | gccagtagct  | gatataataca | acttaattaa  | caaatacatt  |
| 11701 | tcactcttaa  | taaccattga  | tactggttta  | atacccaaat  | cctcatctat  | ttgttctacc  |
| 11761 | aactcacgca  | aatataaagt  | acttctcaaa  | cttttttttc  | cgttgacata  | atcattcatt  |
| 11821 | actacttctc  | gaatagggag  | gttttctata  | tcgagtgttt  | catagcctga  | agtaattaca  |
| 11881 | cgtatactgc  | tttcttctct  | attaagttca  | ttgcgcata   | tttccaaaaa  | aactgtacag  |
| 11941 | aggtcagagc  | ttcttttctt  | cctttcactt  | aaacatctac  | ctaaatctaa  | cttattttct  |
| 12001 | gattggccaa  | ggaaagtaga  | ttcttcaaca  | tcttttaacca | tagaaaaat   | tttactttgc  |
| 12061 | tgattgccta  | cctcagtc    | cattaattta  | gagcaactgt  | ttattatgtc  | ctgaccataa  |
| 12121 | ccacttaata  | agagattgtt  | ttgtaaagtc  | cttgacaatg  | ctgagatttg  | agtaacattt  |
| 12181 | aacttatttc  | caaactcaga  | taactgttct  | aagctgcagg  | aatcctctgt  | aaagctaatt  |
| 12241 | tgatcttgaa  | gtgacgaaaa  | acctaacaat  | tgatacgttg  | gatttctatt  | ttcactttca  |
| 12301 | aaactatcaa  | ttgatattaa  | acatttaaa   | tcattttctg  | ttttcggagt  | atatttatcc  |
| 12361 | ctattctgat  | aattttctga  | agctttacca  | attaaatctt  | gtattttttc  | cacctcagat  |
| 12421 | aagctaaacc  | tatctaacct  | acggattgtt  | actggttcta  | agcctagatc  | aaactccaat  |
| 12481 | gtagaaatcc  | tataagactt  | actattattc  | caacctttta  | tgttgaccgt  | atgattggac  |
| 12541 | ctcttatcac  | gaaatatcag  | atctgcatca  | ctgctgaaaa  | cttcaacttg  | accaggacta  |

|       |            |            |             |             |             |             |
|-------|------------|------------|-------------|-------------|-------------|-------------|
| 12601 | atattcttta | atatcattac | tcctatgcgt  | tcctcgtcct  | gtcctacagc  | agtagagata  |
| 12661 | tttttttcta | acttttgatt | atgctggata  | acagtagtgg  | ggttactaaa  | atcttcaacg  |
| 12721 | tattctttta | caattctttt | ataatcacct  | ctaagtttat  | ccttatactc  | cattacattg  |
| 12781 | tcaacgtttc | ctagcaactc | aggagatgga  | aagagatcat  | tattctccca  | taaagaataa  |
| 12841 | gaaatattct | tccatttact | ttggtcagtg  | taaaatcctt  | ctatttctaac | aataaaagga  |
| 12901 | gttccccctt | ctcttattag | taagagatca  | tcttgatcct  | tatatctctc  | gatatcttca  |
| 12961 | agacgagaat | ctatcactac | atgatcacct  | tgaaaatcct  | tagataacaa  | aacataactt  |
| 13021 | tgagtctgtg | tagcttgtaa | aaaaggaact  | aatttaccct  | ctcctgaata  | agagggagaa  |
| 13081 | caggacatta | attgtatatt | aggggtaaaa  | gtttctcctt  | tcttgttcat  | aattataaga  |
| 13141 | tgcctatgat | tatgatcttg | cagatagttt  | tttacttgaa  | tactagtgtt  | attataattt  |
| 13201 | aaatgtaagt | tacattgttg | aactaaaaaa  | tcttttttaa  | cctctggcat  | aaatagtgtg  |
| 13261 | tccgcttttt | catcatctga | ataattatca  | atctgaattt  | ctttgttacc  | tataccatta  |
| 13321 | gcaataacat | atacatcact | tcctcttcct  | cctcttgcaa  | atatagtacc  | ttgatcgaag  |
| 13381 | ttgattacat | catctcctga | agaacccaaa  | gccatgtgtg  | gaactatatt  | attatcttga  |
| 13441 | ccttggtgtt | ttcctcta   | aactactaaa  | accttgtaat  | tcttaccatt  | gtttaaaatt  |
| 13501 | tttttgta   | gattttctac | agcattaaga  | ctatctagag  | gatgttctga  | gtgtaattca  |
| 13561 | aatgaggtga | tttctatagt | tgacgaatct  | gatctttcaa  | tcttaggaac  | aataattacta |
| 13621 | ccattttttg | ctattagtgc | aaagtgaggt  | ttattactgc  | tttgttcaac  | ataatttttt  |
| 13681 | atatcaagag | taaattgatt | attttgacca  | aaatttatct  | ttaaagataa  | agtattactg  |
| 13741 | cttgtagaat | aagtgatttg | atcacaaatca | cctaataaat  | cgatttccgg  | aaaaattata  |
| 13801 | gttcctattc | catccacatc | aatttctgaa  | tataaacctt  | tacctttata  | gtctgcagtt  |
| 13861 | tttacgtaaa | aagtataa   | gctttttcca  | cctttgaccg  | tagtatacgg  | cgaaatgatt  |
| 13921 | actttcttgc | aattttcgac | tacatctttc  | ttattattat  | caaaaccacc  | accactatct  |
| 13981 | acgataacct | tgcggtcac  | gtttcctata  | aagtgtctag  | agtaaccat   | gcacaagatt  |
| 14041 | tcatctacct | tgctctgcct | tgcaatgtaa  | tggtactaa   | atagggtatt  | actaacataa  |
| 14101 | tcatcaatca | acaaacgatt | atttattttt  | acgtttaatc  | ttccataggc  | actaggctta  |
| 14161 | aaacgatagt | caatcacacc | tgtaacttta  | tcttccacta  | attgacttaa  | atcaagtata  |
| 14221 | ttagcagagt | tacttccgcc | aataatcttg  | cctaaaaagc  | tagagttatt  | tacaagaaca  |
| 14281 | aacctatttg | ctacattatt | gccaccgact  | atctcttctg  | tgccctgggtg | aatcaaaaag  |
| 14341 | ttattattcc | atttattatg | tccaataatg  | gtaccttcgc  | tcacattttg  | taggtcgtag  |
| 14401 | acaattgttt | tatccttttg | tttctgtttt  | accctattat  | cgtgactaat  | aaccattgca  |
| 14461 | ttatcacaat | agtacttagc | tgatagaata  | gaacttttaa  | tacctttttc  | ataatcctgc  |
| 14521 | tctgtaatct | gcggaagca  | aattctgtta  | gcacctttaa  | tatgatcagg  | tataacacgc  |
| 14581 | gaaagatttt | ctgtattagc | atttgttcta  | ttcatcataa  | ttattgcata  | gtcaggacga  |
| 14641 | atagtatcac | cgtttatttt | tccaagacca  | acaccataag  | caacaacact  | gttaggacca  |
| 14701 | ttatttagag | cttgccaaac | ttcttttagc  | agactattaa  | ctgtctcctt  | tctagctaca  |
| 14761 | agatgttgta | catcagctgc | catagggtga  | aaaagaagcg  | tcctccaaaa  | tatactccag  |
| 14821 | ttttctccat | gggttgatc  | atactttttc  | tcgtactcta  | cgatattact  | gacaccacta  |
| 14881 | taaattccat | aacctaccat | gagcccaaac  | ccaactgcaa  | taccaattac  | tggcatacca  |
| 14941 | gcggtgttaa | gagcaacacc | agaaacaaat  | gatgcactag  | aaaaggatac  | agatgctata  |
| 15001 | ttatctctta | tctctttctc | tccacatgga  | tcattactat  | tctctttttt  | tttacaatct  |
| 15061 | acaagattac | ttgttgacat | gcctatctca  | acaatatcaa  | agacgccagc  | tatagcccct  |
| 15121 | gctgtaccct | ttgtatttgt | acttccaaat  | tttactcctg  | caatttgaac  | agcaaat     |
| 15181 | gtctgtttac | ctaaagtacc | tggtacaatt  | tttcccataa  | ccctttcagc  | tgatgctata  |
| 15241 | acttttgag  | taattttaac | cattgcactt  | tcaattgggt  | gagacgtaaa  | agaccaccct  |
| 15301 | attccaccta | aatttaattc | acaatctgtt  | gccgttccat  | ccttacaaga  | tacaatggca  |
| 15361 | ccatgaattc | ctcttattaa | ttgtattcca  | cctgcagcat  | tcattaacct  | gcctttta    |
| 15421 | tttgagcctt | ttgttgca   | actagcttgc  | tggtgagatat | ctccatgcaa  | attcttaaca  |
| 15481 | cgttcattct | gaacatagcg | ttcataccct  | tgatctccaa  | caaccttata  | aagtaagtac  |
| 15541 | ttgcgatcac | cttcaatatt | tttgtcccca  | acgaactcta  | ttagctgagc  | at          |
| 15601 | tcatcttgac | tgtttttaag | ataagttagg  | aacttttcac  | tatcaattat  | aattttgtct  |
| 15661 | acattat    | cgtctacctt | tcctttacta  | aactttttcca | catcatcttt  | tgaaaataaa  |
| 15721 | caaggattag | tacttctttt | gcttctacca  | ccttgctttg  | cacaactatt  | tg          |
| 15781 | ttttttctag | tattttgggt | aagtttcttt  | ctagactgtt  | gtgtttcaga  | aagtatagcc  |
| 15841 | tctaggttag | ctatacgttg | tg          | cttaatatat  | ttgaaatata  | ttctcttgaa  |
| 15901 | cgcacaaaat | gatcttcatt | tctttctcga  | acttgtaaat  | ggttgcg     | ttcatcaaga  |
| 15961 | acattat    | tactcccttg | caatacagta  | ttaatatctc  | tagcg       | taacgccc    |
| 16021 | aagccacaat | tgtgaccatc | tatctgttga  | gcaacagaaa  | catcattaac  | ggcaatttga  |
| 16081 | gcacgttgta | gaacttgacg | aatattacct  | gggatattat  | tacccaacga  | gtctacataa  |
| 16141 | tatccactat | actgaccgtt | ttgatac     | ataactaacg  | taacc       | attattat    |

```

16201 aaattaacaa ttaaagttaa tggccttttt tcaccacctc ttacgctatt ttgaaactgc
16261 tgcaattgac tggctatatg ctctgggtgat ccaacgatct caaacagcat atcagttcca
16321 tcattttctat aaccatattg tacccttgca atatcagcta tatcgtgttg ttgaagccag
16381 taatgatagt ccttctctat tgttgcatat tctaaagtct cttttatagt cgtactcttt
16441 agtctctgta ttagttgttt tatacttttt aaatgttttt ctttgactac gtcaatagag
16501 ctgtgggtc ctttagcaga aataagttca tcaactcgta atattagaga atctttgttt
16561 tgagctttta cattaacaac tacacccatg aaaaacattt tatcactatc tgtaattgct
16621 ttcagtgccg cccctttaga atatctaaca ttttgctctt ttgttaattt atcaacctct
16681 tttttcattc ctcttttatc taagttttta tctataagct taaattccag cgctatagaa
16741 gtgtattctt tagtaccctg aggtgaagga ccaatacctt gaattaccat atctacacga
16801 ccacctgctc ctacttgaaa ttcaggtata attatagtct tcgcagaagt ctctgtagc
16861 ttcaaatac tgtaactact aaataaacca ttaagaacag cttgcaatct tgcttcatta
16921 gtaatcaaat ctttaatagg gtaaaccgca tctgccactt cactaagcaa cactttatag
16981 gcttgcaatg aaaccttact gtcagaaaca tgttgagaag tgattgcttg atcaagtttt
17041 acctttaatt cattagaatc aggtatcttg agaaaactac ctgtaaattt ttgatcggca
17101 ccacttggtt tatacttact tatctgttct attttaaaaa ggctcgtctt aaagaataac
17161 cccgcttcat actttttcag actcatttta atttctatga catttcctat tcttcctatt
17221 tcaggtatgt tcagaactgg aatttttttg tcagcataga attcctttgt attggattct
17281 cgtatatgaa aaatgaatgc tattttctct tgtccttcat taccttgaac aagtattaat
17341 gtcataatcg ggctttttaga taaagtgtac tctgttccct gaggccaat aagcgggtac
17401 tcatcatatg agtatatata ttttttaatg ttactttgat cttgaccaat tttgttaatt
17461 agaattgatt gacctaatat gtctctactg aaatagtaat gatcttttgt ttctttattt
17521 gctggaaaag tatggtattc acttgataat aaatctgcta tttctcgctt aaaatcttct
17581 tcagaaattt gttgattatt ccatctgtga gctaatttta caaaatcttc catcaagggg
17641 acaggagggt gtttaatagg ttttacttca gtcttaaacy attctgtgta atctaaattt
17701 aatccaacag caatagcatt atctgcattg gttaaaacc tcactttatt tgggtctaaa
17761 ctttcaatgt aaccttctgc ttgcttcagt gcatcatttg gagtcacttc gcctacagtt
17821 ccagccttta gctcaataag aattggaact gaatacaac cagcattagg accacgaaca
17881 agcaaaacaa tatcagcata acctccgcca gcaactgct ccagatagag tttggtatta
17941 tcacgatatc gaaagttatc aaacattcct gctacaaaac catggtgacc agcttcacga
18001 gctttaatgc cataaacatt attttgtaaa tttaaattag tatgaacttt tttaatataa
18061 ttcagaatgg ctttaagatt ttcctgaact tgatctattt ctgcatctgg gttagctagc
18121 ttttcaatat aactttctag atagatagac ttacctaaact tttttaccac ttcttgaaac
18181 tctattgaag gaaggatagg tacatctttg atcttctttt tactttctac cttaatattg
18241 atttttttat tttctccatt actctttaag gtatatccct tttctgaagt cattctagat
18301 aactccttcc tggcattatc actaagatct ttaccttgct tacctagaaa ctgctcgact
18361 tcatcgaaaa ccttgccctt taattgatca cgactaatct cgattgtttt aacattacca
18421 tatacattct tagttttata ctctaacaca tcatcccttt tcagatataa gtataacttc
18481 tttgatttaa catctttgtc tgatttaggt ttgcttttta ctaactcata tttgtctttt
18541 agaattttta ttacatcaat ttgaagctta cgagcatcca attcagtata atctttacct
18601 attacactct tgaactcgtc cttggtgaat tcaaatctcc tagtatggac atctgaaggc
18661 ttagagtgtt gagcttctat atcttcagta aaaataaaaa catgtatttt ggattctgtt
18721 tctgtacaa tctttaaagt tcttgcccct tcaaaacgaa aatgtaactt ctttataacct
18781 agcttatcat taagtttagt atctaataca ctggaaaaaa aacctaataa tcgatgagga
18841 aaaaagccag gtttttctact agaattgtaa taggattgta tttgatcaac caatgactga
18901 tatcttgctt caaacgactt atccagtaaa tccgctgcat cagaagttga agaacctacc
18961 ttaccgaaaa gtaactcaat taactcgaaa tcttggtggt tttcttgctg ttgattgtca
19021 tcaaccataa ctacaccccc atttgaactt tttaaaattt ttactctgac taaagccctt
19081 tatgtgcttt cgtttaagtc taagcaactg aattccctaa acagaaacac tatactctgc
19141 ttctaacatc agtaatttcc tgttttacag actccacatc taatgatgaa cttggcaact
19201 gactatcacc tgccccacga tccaactgct tgttttctaa ctctcataaa cagctcatat
19261 tctgatttat cttcttccat aatagagtac atttgctctt ggctaagg

```

//

```

LOCUS      JAQZAU010000143              1979 bp    dna      linear    ENV 17-MAR-2023
DEFINITION MAG: Wolbachia pipientis isolate wEsol contig_7865, whole genome
            shotgun sequence.
ACCESSION  JAQZAU010000143  JAQZAU010000000
VERSION    JAQZAU010000143.1
DBLINK     BioProject: PRJNA929258
            BioSample: SAMN33142973

```

KEYWORDS WGS; ENV; Metagenome Assembled Genome; MAG.  
 SOURCE Wolbachia pipientis (insect metagenome)  
 ORGANISM Wolbachia pipientis  
 Bacteria; Pseudomonadota; Alphaproteobacteria; Rickettsiales;  
 Anaplasmataceae; Wolbachieae; Wolbachia.  
 REFERENCE 1 (bases 1 to 1979)  
 AUTHORS Fiutek,N., Couger,B.M., Roy,S., de la Torre,J.R. and Connor,E.F.  
 TITLE Genomic assessment of the contribution of the Wolbachia  
 endosymbiont of Eurosta solidaginis to gall-induction  
 JOURNAL International Journal Molecular Sciences  
 REFERENCE 2 (bases 1 to 1979)  
 AUTHORS Fiutek,N., Couger,B.M., Roy,S., de la Torre,J.R. and Connor,E.F.  
 TITLE Direct Submission  
 JOURNAL Submitted (10-FEB-2023) Biology, San Francisco State University,  
 1600 Holloway Ave, San Francisco, CA 94132, USA  
 COMMENT ##Genome-Assembly-Data-START##  
 Assembly Date :: JUN-2019  
 Assembly Method :: FLYE v. 06-2019  
 Genome Representation :: Full  
 Expected Final Version :: Yes  
 Genome Coverage :: 100.0x  
 Sequencing Technology :: Illumina HiSeq; PacBio Sequel  
 ##Genome-Assembly-Data-END##  
 FEATURES Location/Qualifiers  
 source 1..1979  
 /organism="Wolbachia pipientis"  
 /mol\_type="genomic DNA"  
 /submitter\_seqid="contig\_7865"  
 /isolate="wEsol"  
 /isolation\_source="galls on Solidago altissima"  
 /host="Eurosta solidaginis MN-2018-EFC"  
 /db\_xref="taxon:955"  
 /environmental\_sample  
 /country="USA: Cowling Arboretum, Carleton College,  
 Northfield, MN"  
 /lat\_lon="44.48 N 93.13 W"  
 /altitude="280 m"  
 /collection\_date="2018-11"  
 /metagenome\_source="insect metagenome"  
 /note="metagenomic"  
 gene <1..235  
 /locus\_tag="wEsol\_01638"  
 CDS <1..235  
 /locus\_tag="wEsol\_01638"  
 /codon\_start=1  
 /transl\_table=11  
 /product="hypothetical protein"  
 /translation="VSSLDGDPGPSQGTISGKGEVLPVEYRSDNSSSKKVDRDSGFC  
 MGSPDVQHKGSVSSELKHPQQVKHTSEALGKEI"  
 /besthit="qcoverage 100 , hcoverage 12.6229508196721 ,  
 similarity 100 , identity 100 , evaluate 5.97e-41 ,  
 alnlength 77 , Bacteria , Proteobacteria , WP\_209452452.1  
 hypothetical protein [Wolbachia endosymbiont of  
 Ceratosolen solmsi]"  
 gene complement(240..1475)  
 /locus\_tag="wEsol\_01639"  
 CDS complement(240..1475)  
 /locus\_tag="wEsol\_01639"  
 /codon\_start=1  
 /transl\_table=11

```

/pfam="Terminase_6"
/fullproduct="qcoverage 98.5401459854015 , hcoverage
85.0840336134454 , similarity 97.0 , identity 93.8 ,
evaluate 2.21e-279 , alnlength 405 , Bacteria ,
Proteobacteria , WP_182158647.1 phage terminase large
subunit [Wolbachia pipientis]"
/translation="MLRGPHGYWATARIIVASYSKLLSEKHS�DTRCIMQSDWYKKLF
PEVELSKDQNTKYKFQTVQRGYRIATSVGGTTLTGEGGDFIIVNDPLNPAQALSETFRK
RATNWFDQTLVTRLNDRKKGIVIVLVMHRLHLEDLTGHLLSKPKNIWHHICLPMISEKV
EIIDSIIITQEKGLYSREENELLYPLEGGREEVEMIKVELGSYAFAAQYQQNPLPLSSG
I IKQEWLKYKNFPDNL SHVTQSWDTAVSTNDSSDFSVCTTWAKIDNKFYLLDVYRAK
LEYPKLKEQVLSLAARWAPHAILIEAKTSSQQLTQELKANS DLP IIEIVPHNDKLTRF
YQIVPVIESGRVFLPHQAVWLNDFEYEILMFPEARYDDQVDSTVQYLQWMRKNTNTSAF
RVRDFGPNPNKTLGWLRYI"
/product="phage terminase large subunit"
/besthit="qcoverage 98.5401459854015 , hcoverage
85.0840336134454 , similarity 97.0 , identity 93.8 ,
evaluate 2.21e-279 , alnlength 405 , Bacteria ,
Proteobacteria , WP_182158647.1 phage terminase large
subunit [Wolbachia pipientis]"
gene complement(1414..1650)
/locus_tag="wEsol_01640"
CDS complement(1414..1650)
/locus_tag="wEsol_01640"
/codon_start=1
/transl_table=11
/fullproduct="qcoverage 100 , hcoverage 100 , similarity
98.7 , identity 98.7 , evaluate 4.11e-52 , alnlength 78 ,
Bacteria , Proteobacteria , RLT61225.1 hypothetical
protein WANA34_0184 [Wolbachia endosymbiont of Drosophila
ananassae]"
/translation="MNFLKFIELCFQTVVPGCEYNDYQYIKVIADRLEAANAGEVRRRI
IFNMPPRSMKSICMSVAWPAWILGNCKNNSCKLF"
/product="hypothetical protein"
/cog="COG5410 COG5410 305 Uncharacterized protein
conserved in bacteria"
/besthit="qcoverage 100 , hcoverage 100 , similarity 98.7
, identity 98.7 , evaluate 4.11e-52 , alnlength 78 ,
Bacteria , Proteobacteria , RLT61225.1 hypothetical
protein WANA34_0184 [Wolbachia endosymbiont of Drosophila
ananassae]"

```

# ORIGIN

```

1  tgtaagttct  ctagatgggtg  atccaggccc  gtcacaaggt  actatttcg  ggaaagggga
61  ggtactacct  gtagagtata  gatctgataa  ctctagttct  aaaaaagtt  atagagatag
121  tggtttttgt  tctatgggtt  ctctgatgt  gcaacataag  ggaagtgtct  cttcagagct
181  taaacatccg  caacaggtaa  agcatacgtc  agaagctttg  gggaaagaaa  tttaggtttt
241  tagatatatc  ttaaccaccc  aagtgtttta  ttagggtttg  gaccaaatac  cctgaccctg
301  aaagcactgg  tgtagtttt  tctcatccat  tgcagatatt  gcaccgtact  atccacttga
361  tcatcgtagc  gagcttctgg  gaacattaaa  atttcgtact  caaaatcatt  gagccatacc
421  gcttgatgcg  gcagaaaaac  cctgccagac  tctatcaccg  gaacaatttg  ataaaaatcga
481  gtgagtttgt  cattgtgtgg  cacaatttca  ataatcggt  gatcgctatt  tgcttttagc
541  tcttggtgta  attggtgact  actcgttttt  gcttcgatca  aaattgcgtg  tgggtgccc  at
601  cttgcagcta  gtgacagaac  ttgctcttta  agctttgggt  actcaagctt  tgctcgatat
661  acatcaagta  aatagaattt  attatctatt  tttgcccagg  tgggtgcagac  gctaaagtcg
721  ctggaatcgt  ttgttgaaac  tgcagtgtcc  cagctttgag  ttacatgtga  gagattatca
781  gggaaatttt  tatagcgctt  tagccactct  tgttttatta  taccacttga  aagcggcagg
841  gggtttttgt  gatattgagc  agcaaaagcg  taactcccga  gttcaacttt  tatcatctca
901  acttcttctc  ttctccctc  caggggatat  aataactcat  tctcttctct  tgaatataaa
961  cttttttctt  gtgttataat  tgagtcgatt  atctccactt  tttcagaaat  cattggcaaa
1021  caaatgtgat  gccatatgtt  ttttggcttg  gataagaggt  gccctgttaa  gtcttccagg

```

```

1081 tggagcctat gcatacacaag cacaattact cctttttttc tatcgttgag tctcgttact
1141 aaagtctgat cgaaccagtt tgtggcacgt tttctaaatg tttcactcaa agcttgagca
1201 gggttaagcg gatcattcac aataataaag tcaccacctt caccggttaa tggtcctcca
1261 actgatgttg cgattctgta tcctctctgt actgtttgga atttgtattt agtgttctgg
1321 tctttggata gttctacctc tggaaatagc tttttatacc aatcagattg cattatgcac
1381 ctggtatcga gcgaatgttt ttcactaagc aacttagaat aacttgcaac tattattctt
1441 gcagttgccc agtatccatg cggggccacgc aacactcata catatggact tcattgaacg
1501 cggaggcata ttgaatatta tgcgccttac ttcgccagca ttcgctgctt ccagcctgtc
1561 tgctatgact tttatgtact gataatcatt atactcacat cccggcacca ctgtttgaaa
1621 gcacagttca atgaatttta gaaagttcat gttagacctc ctatagtatc acccaagtaa
1681 cccctatggg gtcattccaag tagccgacac tggttccttt atgacggcgt catgcaagta
1741 gctgacactg gaatccagtt tttattatac agctgctcaa tgtgctcatt acagtgaagt
1801 ttccagtgtc tgggcactgg gatgacatcc tttgggtttt tatatggtta tgcaagaaat
1861 ctagtgtaga ttttaattta ttttataaga ttgaagtgtt acagtacgga gcttacaaca
1921 ctactgtttt gtaaatttag tgaataaaat tacttcttta actttattga agcgaaaaa

```

//

```

LOCUS      JAQZAU010000144                650 bp    dna        linear    ENV 17-MAR-2023
DEFINITION MAG: Wolbachia pipientis isolate wEsol contig_7919, whole genome
            shotgun sequence.
ACCESSION  JAQZAU010000144  JAQZAU010000000
VERSION    JAQZAU010000144.1
DBLINK     BioProject: PRJNA929258
            BioSample: SAMN33142973
KEYWORDS   WGS; ENV; Metagenome Assembled Genome; MAG.
SOURCE     Wolbachia pipientis (insect metagenome)
ORGANISM   Wolbachia pipientis
            Bacteria; Pseudomonadota; Alphaproteobacteria; Rickettsiales;
            Anaplasmataceae; Wolbachieae; Wolbachia.
REFERENCE  1  (bases 1 to 650)
AUTHORS    Fiutek,N., Couger,B.M., Roy,S., de la Torre,J.R. and Connor,E.F.
TITLE      Genomic assessment of the contribution of the Wolbachia
            endosymbiont of Eurosta solidaginis to gall-induction
JOURNAL    International Journal Molecular Sciences
REFERENCE  2  (bases 1 to 650)
AUTHORS    Fiutek,N., Couger,B.M., Roy,S., de la Torre,J.R. and Connor,E.F.
TITLE      Direct Submission
JOURNAL    Submitted (10-FEB-2023) Biology, San Francisco State University,
            1600 Holloway Ave, San Francisco, CA 94132, USA
COMMENT    ##Genome-Assembly-Data-START##
            Assembly Date      :: JUN-2019
            Assembly Method    :: FLYE v. 06-2019
            Genome Representation :: Full
            Expected Final Version :: Yes
            Genome Coverage    :: 100.0x
            Sequencing Technology :: Illumina HiSeq; PacBio Sequel
            ##Genome-Assembly-Data-END##
FEATURES   Location/Qualifiers
            source              1..650
                                 /organism="Wolbachia pipientis"
                                 /mol_type="genomic DNA"
                                 /submitter_seqid="contig_7919"
                                 /isolate="wEsol"
                                 /isolation_source="galls on Solidago altissima"
                                 /host="Eurosta solidaginis MN-2018-EFC"
                                 /db_xref="taxon:955"
                                 /environmental_sample
                                 /country="USA: Cowling Arboretum, Carleton College,
                                 Northfield, MN"
                                 /lat_lon="44.48 N 93.13 W"
                                 /altitude="280 m"

```

```

gene      /collection_date="2018-11"
          /metagenome_source="insect metagenome"
          /note="metagenomic"
          complement(157..>650)
          /locus_tag="wEsol_01641"
CDS       complement(157..>650)
          /locus_tag="wEsol_01641"
          /codon_start=1
          /transl_table=11
          /product="hypothetical protein"
          /pfam="Pfam-B_5350"
          /translation="TGATKGEYLNHNSPELIEAEQNQAVILRIAVEFPEILNRPIFFE
          QFSHFETNEMKRLQQRVIDVISNKS KLDKEALLQELKQFNVIKYVFEKTSVLNSQLN
          ERKSAEIVWNNIVLLKELNALRKERTEARLSGNLDLEERLIEQIEQIESSIQEMQMEF
          IEK"
          /besthit="qcoverage 100 , hcoverage 28.0068728522337 ,
          similarity 100 , identity 100 , evaluate 3.08e-97 ,
          alnlength 163 , Bacteria , Proteobacteria ,
          WP_151807937.1 DNA primase [Wolbachia endosymbiont of
          Nasonia oneida]"

```

#### ORIGIN

```

1  gctaactaca aaaattatac attttcaagt gatcctaacc atatcaaaaa ctacagggca
61 aagctgttgg aggaaggctt aattagttaa aaatttcaat cttatgtaaa atattgtcct
121 attttghtaat tttcttggtg actaacgaga cgatatctac ttttcaataa actccatttg
181 catttcttgt atactacttt ctatttgctc tatttggttct attaaccttt cttctaagtc
241 aagattaccg ctcagcctcg cttcggttct ttcttttcgt aatgcattta attcttttag
301 taacactata ttattccaca caatttctgc agattttctc tcgttcagtt ggctatttag
361 tacactagtt ttttcaaata catactttat aacgttaaac tgtttcaatt cttgtaacaa
421 agcctcttta tcgagtttgc ttttgttact tattacatca attacacgct gttgtaatct
481 tttcatctca ttagtaaatt caaatgaga aaattgctca aaaaatatag gacgggtcaa
541 aatttcagga aattctacgg ctatacgcaa aattacggcc tgattttgct ctgcttcaat
601 tagctctgga gatttggttat gaagatactc accttttggt gtcctcagttt

```

//

```

LOCUS      JAQZAU010000145                2034 bp    dna        linear    ENV 17-MAR-2023
DEFINITION MAG: Wolbachia pipientis isolate wEsol contig_8674, whole genome
            shotgun sequence.
ACCESSION  JAQZAU010000145  JAQZAU010000000
VERSION    JAQZAU010000145.1
DBLINK     BioProject: PRJNA929258
            BioSample: SAMN33142973
KEYWORDS   WGS; ENV; Metagenome Assembled Genome; MAG.
SOURCE     Wolbachia pipientis (insect metagenome)
ORGANISM   Wolbachia pipientis
            Bacteria; Pseudomonadota; Alphaproteobacteria; Rickettsiales;
            Anaplasmataceae; Wolbachieae; Wolbachia.
REFERENCE  1  (bases 1 to 2034)
AUTHORS    Fiutek,N., Couger,B.M., Roy,S., de la Torre,J.R. and Connor,E.F.
TITLE      Genomic assessment of the contribution of the Wolbachia
            endosymbiont of Eurosta solidaginis to gall-induction
JOURNAL    International Journal Molecular Sciences
REFERENCE  2  (bases 1 to 2034)
AUTHORS    Fiutek,N., Couger,B.M., Roy,S., de la Torre,J.R. and Connor,E.F.
TITLE      Direct Submission
JOURNAL    Submitted (10-FEB-2023) Biology, San Francisco State University,
            1600 Holloway Ave, San Francisco, CA 94132, USA
COMMENT    ##Genome-Assembly-Data-START##
            Assembly Date      :: JUN-2019
            Assembly Method    :: FLYE v. 06-2019
            Genome Representation :: Full
            Expected Final Version :: Yes

```

Genome Coverage :: 100.0x  
Sequencing Technology :: Illumina HiSeq; PacBio Sequel  
##Genome-Assembly-Data-END##

FEATURES

Location/Qualifiers  
source 1..2034  
/organism="Wolbachia pipientis"  
/mol\_type="genomic DNA"  
/submitter\_seqid="contig\_8674"  
/isolate="wEsol"  
/isolation\_source="galls on Solidago altissima"  
/host="Eurosta solidaginis MN-2018-EFC"  
/db\_xref="taxon:955"  
/environmental\_sample  
/country="USA: Cowling Arboretum, Carleton College,  
Northfield, MN"  
/lat\_lon="44.48 N 93.13 W"  
/altitude="280 m"  
/collection\_date="2018-11"  
/metagenome\_source="insect metagenome"  
/note="metagenomic"  
gene <1..640  
/locus\_tag="wEsol\_01642"  
CDS <1..640  
/locus\_tag="wEsol\_01642"  
/codon\_start=1  
/transl\_table=11  
/product="hypothetical protein"  
/pfam="Rotamase\_2"  
/translation="EILSEYNLP IQTIGPVDASGKDQSGNNVGDSGDLISFIFSREKD  
QKGYFKGVGDAVVSVKIVDIFPPKLQSFEFGKALAVELWRSEFIKERMFKFGQEVAVQ  
LREKTDLEEI QGVVELVKQQMHRNKVDQQNYPFSFVEE I FNMKTTG SVTDPIQYNNEI  
IIGVLKEMHSSNGKLNLTDTGKRVMISLKEQLISYLESKYKVEVNHAILDDI"  
/besthit="qcoverage 100 , hcoverage 36.2393162393162 ,  
similarity 100 , identity 100 , evaluate 5.44e-139 ,  
alnlength 212 , Bacteria , Proteobacteria ,  
WP\_208571619.1 SurA N-terminal domain-containing protein  
[Wolbachia pipientis]"  
gene 1017..1337  
/locus\_tag="wEsol\_01643"  
CDS 1017..1337  
/locus\_tag="wEsol\_01643"  
/codon\_start=1  
/transl\_table=11  
/fullproduct="qcoverage 100 , hcoverage 100 , similarity  
100 , identity 100 , evaluate 1.53e-60 , alnlength 106 ,  
Bacteria;Eukaryota , Proteobacteria;Arthropoda ,  
WP\_006279266.1 MULTISPECIES: 30S ribosomal protein S16  
[Wolbachia]"  
/cog="RpsP COG0228 87 Ribosomal protein S16"  
/pfam="Ribosomal\_S16"  
/tigr="TIGR00002\_S16 78 ribosomal protein S16"  
/product="30S ribosomal  
protein S16"  
/translation="MAVKIRLARFGAKKRPFYRIVVADSRAPRDGRFIEKIGQYDPML  
PKDNKNRVVVKADRLKHWSVGAQATERVLWFIKKGIVTLETETPKKTEKKKVENEKAQ  
GQEA"  
/besthit="qcoverage 100 , hcoverage 100 , similarity 100  
 , identity 100 , evaluate 1.53e-60 , alnlength 106 ,  
Bacteria;Eukaryota , Proteobacteria;Arthropoda ,  
WP\_006279266.1 MULTISPECIES: 30S ribosomal protein S16

gene [Wolbachia]"  
 1348..>2034  
 /locus\_tag="wEsol\_01644"  
 CDS 1348..>2034  
 /locus\_tag="wEsol\_01644"  
 /codon\_start=1  
 /transl\_table=11  
 /product="hypothetical protein"  
 /pfam="polyprenyl\_synt"  
 /tigr="TIGR02749 prenyl\_cyano 322 solanesyl diphosphate synthase"  
 /translation="MLNTDLTNSDKLDDIVSSDLSAMNDFVFKNVNDEDAKLATDIIS  
 HLVRSGGKKIRPKLVFIICKMLNYSGENRINVAASVEFIHNATLLHDDVLDESEARHG  
 VKTANKIWGNKSSILVGDLTLAFLRWLIECGNLNLSILSKASHLLVKGEIKQMTAR  
 FDPHTVRENYFDIIGEKASLFSACCEAASTVSGATNDETERLKNFGFNFGMAFQIVD  
 DMLDYTANQGT"  
 /cog="IspA COG0142 322 Geranylgeranyl pyrophosphate synthase"  
 /besthit="qcoverage 100 , hcoverage 69.8170731707317 ,  
 similarity 100 , identity 100 , evaluate 2.74e-157 ,  
 alnlength 229 , Bacteria , Proteobacteria ,  
 WP\_010962840.1 MULTISPECIES: polyprenyl synthetase family  
 protein [Wolbachia]"

ORIGIN

```

1 agaaatattg agtgaatata atttacctat acaaactatt ggtccagtag atgcgagtgg
61 aaaagatcaa agcggtaata acgtaggaga ttctggtgat ttgatttctt tcattttttc
121 gcgagaaaag gatcagaaaag gttatttttaa gggcggttggg gacgccgttg ttagtgtaaa
181 aatcgtcgat atctttccac ccaaattgca aagttttgaa gaaggcaagg cattagcggg
241 agagcttttg cgtagttagt ttataaaaga agaattgtt aaattcgggc aagagggtgc
301 agttcaacta agagaaaaaa cagatttgga agaaattcaa ggtgtggaat tagttaaaag
361 tcagcagatg caccgcaata aagtggatca acaaaactac cccttttctt ttgtagaaga
421 gattttcaat atgaaaacaa ctggttcagt gacagatcct attcaatata ataataaag
481 tataataggt gttctaaaag aaatgcattc atcaaatggc aaattaaaca cgcttgacac
541 cggaaaacgt gtgatgatat cgctaaaaga gcaattaatt agctatctgg aatcaaagta
601 taaagtcgaa gttaatcacg ctataactga tgatatataa tcaaaaatct tataagctgc
661 ttcaaacgca tccagtggcc agacacacaa ctgtacgaac attgcgattt gagagcaatc
721 ttacttagga aggatgtcat cccagtctgg gatccacgaa ttttattaag tataaaagta
781 gccgttttat gttaaaatac aacgttttaa tgattatgaa aaggctggat tccagactgg
841 aatgacacca tttgctgtgc aatttacctt caaaaatgaa tgttcgtata gctgtgcgcc
901 cggcgctgcc ctacattatt ggtaattata ttataaggtg caaaagttgt ataattcatt
961 tgacttaaaa cggttcattg tataaaattg tggctaatat atgaataaag gttaacatgg
1021 cagttaaaat aagggttgccg aggtttggcg caaagaaacg ccctttttat aggatagttg
1081 tagctgattc acgagcacca agagatgggc gttttattga gaaaatagga caatatgac
1141 caatgttacc aaaagacaat aaaaatcggt ttgtggtgaa agctgataga ttaaaacatt
1201 ggctaagtgt aggcgcgcag gcaactgaaa gagtactgtg gtttatcaaa aaaggcatag
1261 taacttttag aacagaacca aagaaaacag aaaagaagaa agtagagAAC gagaaagcac
1321 aagggaagaa ggcataagtc tcttaaaatg ctaaatactg atttaacaaa cagcgataaa
1381 ttagacgata ttgtatcttc tgatttgtca gctatgaatg actttgtctt caaaaatgtc
1441 aatgatgaag atgctaagct tgctactgat attatatctc atcttgttag gtcagggtga
1501 aaaaaataaa ggcctaaact agtttttatt atatgtaaaa tgctaaacta ttctggggag
1561 aataggatca acgttgctgc atcggttagg tttatacaca atgctacttt acttcatgat
1621 gatgtgctcg atgaaagtga ggcacgccat ggagttaaaa cagcgaataa gatttgggga
1681 aataaatcaa gcatttttagt tgggtgatcta ttgttgactc tagcatttag atggcttata
1741 gagtgtggaa atttaaatat tctctctatt ttatctaaag catcgcatth acttgtgaag
1801 ggtgaaataa agcagatgac agcacgtttt gacccccaca cagtcaggga aaattattht
1861 gatatcattg gagaaaagac agcatcttta ttttctgcat gctgtgaagc tgcataca
1921 gtatctgggt caacaaatga cgaaacagag aggctaaaga attttggtt taattttggt
1981 atggcatttc aaatagttga tgatatgctc gattatactg ctaatcaagg cact

```

//

LOCUS JAQZAU010000146 4767 bp dna linear ENV 17-MAR-2023

DEFINITION MAG: Wolbachia pipientis isolate wEsol contig\_11070, whole genome  
 shotgun sequence.  
 ACCESSION JAQZAU010000146 JAQZAU010000000  
 VERSION JAQZAU010000146.1  
 DBLINK BioProject: PRJNA929258  
 BioSample: SAMN33142973  
 KEYWORDS WGS; ENV; Metagenome Assembled Genome; MAG.  
 SOURCE Wolbachia pipientis (insect metagenome)  
 ORGANISM Wolbachia pipientis  
 Bacteria; Pseudomonadota; Alphaproteobacteria; Rickettsiales;  
 Anaplasmataceae; Wolbachieae; Wolbachia.  
 REFERENCE 1 (bases 1 to 4767)  
 AUTHORS Fiutek,N., Couger,B.M., Roy,S., de la Torre,J.R. and Connor,E.F.  
 TITLE Genomic assessment of the contribution of the Wolbachia  
 endosymbiont of Eurosta solidaginis to gall-induction  
 JOURNAL International Journal Molecular Sciences  
 REFERENCE 2 (bases 1 to 4767)  
 AUTHORS Fiutek,N., Couger,B.M., Roy,S., de la Torre,J.R. and Connor,E.F.  
 TITLE Direct Submission  
 JOURNAL Submitted (10-FEB-2023) Biology, San Francisco State University,  
 1600 Holloway Ave, San Francisco, CA 94132, USA  
 COMMENT ##Genome-Assembly-Data-START##  
 Assembly Date :: JUN-2019  
 Assembly Method :: FLYE v. 06-2019  
 Genome Representation :: Full  
 Expected Final Version :: Yes  
 Genome Coverage :: 100.0x  
 Sequencing Technology :: Illumina HiSeq; PacBio Sequel  
 ##Genome-Assembly-Data-END##  
 FEATURES Location/Qualifiers  
 source 1..4767  
 /organism="Wolbachia pipientis"  
 /mol\_type="genomic DNA"  
 /submitter\_seqid="contig\_11070"  
 /isolate="wEsol"  
 /isolation\_source="galls on Solidago altissima"  
 /host="Eurosta solidaginis MN-2018-EFC"  
 /db\_xref="taxon:955"  
 /environmental\_sample  
 /country="USA: Cowling Arboretum, Carleton College,  
 Northfield, MN"  
 /lat\_lon="44.48 N 93.13 W"  
 /altitude="280 m"  
 /collection\_date="2018-11"  
 /metagenome\_source="insect metagenome"  
 /note="metagenomic"  
 gene complement(<1..162)  
 /locus\_tag="wEsol\_01645"  
 CDS complement(<1..162)  
 /locus\_tag="wEsol\_01645"  
 /codon\_start=1  
 /transl\_table=11  
 /product="hypothetical protein"  
 /pfam="PhaG\_MnhG\_YufB"  
 /tigr="TIGR01300 CPA3\_mnhG\_phaG 97 monovalent  
 cation/proton antiporter, MnhG/PhaG subunit"  
 /translation="MIGSIFIFLGICLIISNIGVIRFPDFYTRLHAAGITDSSGATL  
 LLIGFALQNG"  
 /cog="MnhG COG1320 113 Multisubunit Na<sup>+</sup>/H<sup>+</sup> antiporter,  
 MnhG subunit"

```

/besthit="qcoverage 100 , hcoverage 56.8421052631579 ,
similarity 100 , identity 100 , evaluate 6.31e-28 ,
alnlength 54 , Bacteria , Proteobacteria , WP_006279703.1
MULTISPECIES: monovalent cation/H(+) antiporter subunit G
[Wolbachia]"
gene complement(169..378)
/locus_tag="wEsol_01646"
CDS complement(169..378)
/locus_tag="wEsol_01646"
/codon_start=1
/transl_table=11
/fullproduct="qcoverage 100 , hcoverage 100 , similarity
100 , identity 100 , evaluate 2.62e-33 , alnlength 69 ,
Bacteria , Proteobacteria , ONI57417.1 multiple
resistance and pH regulation protein F family protein
[Wolbachia pipientis wVitA]"
/cog="MnhF COG2212 89 Multisubunit Na+/H+ antiporter,
MnhF subunit"
/pfam="MrpF_PhaF"
/product="multiple resistance and pH
regulation protein F family protein"
/translation="MSVMLCCIVSKSNDVYNKVLAFNNFSTQVVVLITAIISIILNNFF
LIDIALLYASVSFISTIALMRLMLF"
/besthit="qcoverage 100 , hcoverage 100 , similarity 100
, identity 100 , evaluate 2.62e-33 , alnlength 69 ,
Bacteria , Proteobacteria , ONI57417.1 multiple
resistance and pH regulation protein F family protein
[Wolbachia pipientis wVitA]"
gene complement(443..850)
/locus_tag="wEsol_01647"
CDS complement(443..850)
/locus_tag="wEsol_01647"
/codon_start=1
/transl_table=11
/pfam="RNA_pol_Rpb6"
/fullproduct="qcoverage 100 , hcoverage 100 , similarity
100 , identity 100 , evaluate 1.36e-79 , alnlength 135 ,
Bacteria , Proteobacteria , WP_138265031.1 MULTISPECIES:
DNA-directed RNA polymerase subunit omega [unclassified
Wolbachia]"
/translation="MAESIVEKCIERVSNRFLVLLASQRT HDLNTGASNPIQAAKFK
GHKNTIVSLHEIAGKQVDTHELFSLLVGRCKEYMKGNMNNVYSSNTSKLANLLNFS DN
TDLDAQESQDYEV DGEIDDEINDQDGDEEVSV"
/product="DNA-directed RNA
polymerase subunit omega"
/besthit="qcoverage 100 , hcoverage 100 , similarity 100
, identity 100 , evaluate 1.36e-79 , alnlength 135 ,
Bacteria , Proteobacteria , WP_138265031.1 MULTISPECIES:
DNA-directed RNA polymerase subunit omega [unclassified
Wolbachia]"
gene complement(911..1207)
/locus_tag="wEsol_01648"
CDS complement(911..1207)
/locus_tag="wEsol_01648"
/codon_start=1
/transl_table=11
/pfam="HTH_37 HTH_19 HTH_3"
/fullproduct="qcoverage 100 , hcoverage 100 , similarity
100 , identity 100 , evaluate 1.17e-58 , alnlength 98 ,
Bacteria , Proteobacteria , WP_012673420.1 MULTISPECIES:

```

```

helix-turn-helix domain-containing protein [Wolbachia]"
/translation="MEIISLNNLDSAGIKTKLLYIINKIVEKNAWTQAFAAEKLGIDQ
PKVSQIKNGKIDGFSLERLLGFLKKLDHEITITMTESQEIKSEAEKVKHEVESQ"
/product="helix-turn-helix
domain-containing protein"
/besthit="qcoverage 100 , hcoverage 100 , similarity 100
, identity 100 , evalue 1.17e-58 , alnlength 98 ,
Bacteria , Proteobacteria , WP_012673420.1 MULTISPECIES:
helix-turn-helix domain-containing protein [Wolbachia]"
gene 1644..2135
/locus_tag="wEsol_01649"
CDS 1644..2135
/locus_tag="wEsol_01649"
/codon_start=1
/transl_table=11
/fullproduct="qcoverage 100 , hcoverage 100 , similarity
100 , identity 100 , evalue 6.80e-107 , alnlength 163 ,
Bacteria , Proteobacteria , WP_015589499.1 MULTISPECIES:
5-(carboxyamino)imidazole ribonucleotide mutase
[unclassified Wolbachia]"
/cog="PurE COG0041 162
Phosphoribosylcarboxyaminoimidazole (NCAIR) mutase"
/pfam="AIRC"
/tigr="TIGR01162 purE 156 phosphoribosylaminoimidazole
carboxylase, catalytic subunit"
/product="
5-(carboxyamino)imidazole ribonucleotide mutase"
/translation="MTKIKKDIIVIMGSESDYTTMVHTVDMLKALEVSHDIFIISAH
RTPERLFNFAKSAQEEGFKVIIAGAGGAAHLPGMVASLTCLPVIGVPVHSHKQLNGLD
LSIVQMPKGVVPVATMSIGENGAYNAAITAVSILSISNSEIAGRLKKWREKQTKEVKE
KPV"
/besthit="qcoverage 100 , hcoverage 100 , similarity 100
, identity 100 , evalue 6.80e-107 , alnlength 163 ,
Bacteria , Proteobacteria , WP_015589499.1 MULTISPECIES:
5-(carboxyamino)imidazole ribonucleotide mutase
[unclassified Wolbachia]"
gene 2143..3960
/locus_tag="wEsol_01650"
CDS 2143..3960
/locus_tag="wEsol_01650"
/codon_start=1
/transl_table=11
/fullproduct="qcoverage 100 , hcoverage 100 , similarity
100 , identity 100 , evalue 0.0 , alnlength 605 ,
Bacteria , Proteobacteria , WP_141456850.1 MULTISPECIES:
DNA mismatch repair endonuclease MutL [unclassified
Wolbachia]"
/cog="MutL COG0323 638 DNA mismatch repair enzyme
(predicted ATPase)"
/pfam="HATPase_c HATPase_c_3 DNA_mis_repair MutL_C"
/product="DNA mismatch
repair endonuclease MutL"
/translation="MAIILLDTKTINRIAAGEVIERPASVVKELVENAIDAGSLEIEI
KIESGGRNLIIVTDDGNGVEKNDLELAFMRHATSKLSDNELIEIKHLGFRGEALPSIA
AVSRIKLSSKAREANEAWSISYEGGEKIGEQTYPYSLSQGTHIEVRDLFFATPNRLKFL
KTERAETQSIVDIVNNLAMINYHIGFTFNSGNKLLKYAKQTSLFHRLCEVEEEFQGS
SLEINEEEDGIKLTGHICKPTVNRGKSTQIYTFVNGRPIKDNLLIGAVRYAYHDFIPS
DRYPFAALHLEIPYDQVDVNVHPNKSEVRFQNKKLIYEIVTRGLIKALSRRIGTF
LAHQKMDSTLPDPFDKPNVQNERRPSPFENQLIKEFASPNERVKSLSEQSKSFDYTGIQK
LPSQAETMVLEKKVLEQVDLIESHPLGFARCQVYNTYIIAEVRDKLIIVDQHAAHERL

```

VYECLKQKSSIKRQKLLLPETVEIKNQAGMEMIEIYKDKLFEMGFDIEIKSENKVIVK  
EIPAILGAIDVKEMLINIIDLRLTEIEDTLPLVEDKVNKILATIACHGSIRAGRKMRLDE  
MNELLRQMEKTPYSGQC�HGRPTYIEMKLSDIEKLFERR"  
/besthit="qcoverage 100 , hcoverage 100 , similarity 100  
, identity 100 , evaluate 0.0 , alnlength 605 , Bacteria ,  
Proteobacteria , WP\_141456850.1 MULTISPECIES: DNA  
mismatch repair endonuclease MutL [unclassified  
Wolbachia]"  
gene complement(3997..4275)  
/locus\_tag="wEsol\_01651"  
CDS complement(3997..4275)  
/locus\_tag="wEsol\_01651"  
/codon\_start=1  
/transl\_table=11  
/product="hypothetical protein"  
/translation="MTLYYCKWRCNNVLTŁKISAIWLNVEKIKRHAAAIILCNPPINT  
LSFLLNFIPIEPAGQKQVLŠHKYPYCHYKGAGGVCQVVFRLIRFYELLG"  
/besthit="qcoverage 51.0869565217391 , hcoverage  
69.1176470588235 , similarity 95.7 , identity 95.7 ,  
evaluate 1.11e-24 , alnlength 47 , Bacteria ,  
Proteobacteria , WP\_222837221.1 hypothetical protein,  
partial [Wolbachia pipientis]"  
gene 4618..>4767  
/locus\_tag="wEsol\_01652"  
CDS 4618..>4767  
/locus\_tag="wEsol\_01652"  
/codon\_start=1  
/transl\_table=11  
/product="hypothetical protein"  
/translation="MIMNKEEALKILELTDŠHDVISKARKKŁFDSEKNSDVLKTQIEA  
YKSLTD"  
/besthit="qcoverage 100 , hcoverage 8.86524822695035 ,  
similarity 82.0 , identity 70.0 , evaluate 1.30e-08 ,  
alnlength 50 , Eukaryota , Arthropoda , GFQ82745.1  
ankyrin repeat-containing protein [Trichonephila  
clavata]"

# ORIGIN

```

1 tccattctgc aaagcaaaac caattaacaa taacgttgca ccgctagaat ctgtaataacc
61 tgctgcatgt aacctagtat agaaatcagg aaatctgatc acccctatat ttgaaataat
121 tatcaacaaa atacctaaaa atatgaaaat ggatcctatc ataaattatc aaaacaacat
181 taatctcatt agtgctatag ttgatataaa gctaacgcta gcatacaaca atgctatatc
241 aattaaaaaa aaattattca gaatgattga tattgctgtt ataagtacaa ctacttgcgt
301 tgagaaatta ttgaacgcta aaaccttatt gtacacatca tttgacttag acactatgca
361 acacaacatt acactcatac agaacaacag tgtatagata gcaatgcaaa tcattttaag
421 actatgtaac ttcagtagat ttctaaacgg atacttcttc atcgccatct tgatcattta
481 tttcatcatc tatttcacca tccacttcat aatcttggct ttcttgactt gcatcaaggt
541 ctgtgttata agaaaaatth aataaattcg ctagcttact tgtattactg ctgtaaacad
601 tattcatatt tcctttcatg tattccttgc atctacctac caaaaggcta aacagctcat
661 gagtatccac ctgttttcct gctatttcat gtaaggaaac tatggtatth ttatgacctt
721 taaacttagc tgcttgaatt ggattacttg cccctgtatt taaatcatgt gttctttgac
781 ttgccaacag aaccaatthg aaacggttac ttaccggtc tatacactth tctacaatag
841 actcagccat aagatactac cttaataagt tttatactat atcacaaaaa acaagttgtc
901 aactthgtat ctattgcgat tcaacttcat gthttactth ttctgcctca gattthattt
961 cttggctthc tgtcatcgtg attgttatct catgatcaag thttthttaga aatcctaaca
1021 atcgctctaa agaaaaacca tctattthac cattthttaat ttgtgatacc thtggtgat
1081 caataccaag thtctcagct gcaaaagcct gagtccaagc atththththt acaatttht
1141 ttattatata aagcaactth gththththt ctgcactgtc taagttatth aacgatatta
1201 thtccataat tcttacctc acatatcaat taactthatt aaatattata acataatatt
1261 taatatacca agatattaat atcatgtaac ttgtcaataa ttatatgata tcaatattta
1321 aaactthtaag ttgattatat attaatattt ttatcaaatt tctagtaatt ttaaattacc

```

```

1381 attttaccat cagtctatct gaaaaaacca tttatagaaa gaacaagcta agattacaaa
1441 gcttgaaata caaaaataat ttttttataa atttatctta cataagaagt ttatatctct
1501 atatcttaat ataaatatat atttaaattt ttaaaatttc ttttttaacg agaattctat
1561 atattatatt tataatataa tttaaatatt tggtgctttt tagctggaac attatttagt
1621 tagtaagtaa aattgtgttg aatatgacaa aaataaaaaa agatattgct gttattatgg
1681 gaagtgaagtc agattacact actatgggtcc ataccgtcga tatgttaaaa gcattagaag
1741 tttcacatga catattcata atatctgcac atagaacacc agaaaggctc ttcaattttg
1801 ctaaactctgc acaagaagaa ggttttaagg ttattatagc tgggtgcagga ggtgcagctc
1861 atttacctgg tatggttgcg tcactaactt gtttaccagt tatcggcggt cctgtgcata
1921 gtaaacaatt aaatgggctg gacagtctac tctctatagt tcaaagcca aagggtgttc
1981 cagttgcaac catgtctata ggagaaaatg gagcatataa tgctgccatt actgccgtat
2041 ctatattgtc aatttccaac agtgaaattg caggtaggtt aaaaaagtgg agagagaaac
2101 agaccaaaga agtaaaagaa aaaccagttt cataataaat ctatggcaat aattctttta
2161 gacacaaaaa ccataaacgg tatagcagcg ggggaggtga tagaaaggcc agcaagtgtg
2221 gtaaaggaat tagtggaata tgcaatagat gctggaagt tagaaataga gatcaaaata
2281 gaaagtgggtg ggcgtaacct tattattgtg acagatgatg gtaacggagt agaaaaaac
2341 gatttagaac ttgcgtttat gcgccatgct acttcaaaat tgagcgacaa tgagttgata
2401 gaaatcaagc atcttggtt tagaggagaa gctctgcctt caatagcagc agtaagtagg
2461 ataaaattat cgtctaaggc aagagaagca aatgaagcat ggtctataag ttatgagggt
2521 ggagagaaaa taggggagca aactccttac tctttatcac aaggtacaca tattgaagta
2581 cgagatttat ttttgccac tccaaataga ctaaaatttc taaaaaccga aagagcagaa
2641 actcaaagca ttgttgatat tgtaataaac ctagcaatga ttaactatca tatagggttt
2701 actttcaatt caggtaataa aaagctctta aaatacgcta agcagacttc gttatttcat
2761 agattgtgtg aagtagaaga agaatttcag ggcagttctc tggagattaa tgaagaagaa
2821 gacggcatta aacttacggg acacatctgt aaaccgaccg tcaatcgtgg taagtcaact
2881 cagatctata cgtttgttaa tggaaggcca atcaaagata atctacttat tggcgcagtt
2941 aggtatgcat atcatgattt tattccaagc gataggtatc ctttcgcagc gttacattta
3001 gagatacctt atgatcaagt agatgtaaat gtgcatccaa ataagtcaga agtaagggtt
3061 cagaataaga agctcatata tgagatagtg acaagaggat taattaaagc attgtcaaga
3121 aggataggca cctttctagc gcatgaccag aaaatggatt caacattgcc agatcctttt
3181 gataaaccta atgttcaaaa tgaaagaagg ccaagtcctt ttgaaaatca actaataaaa
3241 gaatttgctt ctccaaatga aagagtaaaa agcttatcag aacagtcaaa atcgtttgat
3301 tataccggca tacagaaatt accatcacaa gcggagacta tggttctaga aaaaaagggtg
3361 ttagagcaag ttgatttgat agagagccac ccgctcgggt ttgcacgctg tcagggtctat
3421 aatacttaca ttattgccga ggtaagagac aaattgatta tagtcgatca gcatgcagcc
3481 cacgagagat tagtatatga atgcctaaaa caaaaatcaa gtataaaaag acaaaaaacta
3541 cttcttcctg aaacggttga aatcaaaaat caagccggaa tggagatgat tgaatctat
3601 aaagataagt tatttgaaat gggttttgat attgaaatca aatcagagaa taaagtgata
3661 gtaaaagaaa tccctgcaat tttgggagca atagatgtga aagagatgct aattaacata
3721 attgatagat taacggaaat agaagataca ttgccagtag aagataaagt gaacaaaata
3781 ttggccacta tcgcttgatg tggtatcaatt agagcgggta gaaaaatgag gttagatgaa
3841 atgaatgagc tgctgagaca aatggaaaaa accccatatt ccgggcaatg caaccacgga
3901 agaccaactt atatagaaat gaaactcagt gatattgaaa aacttttttg gcgtaggtaa
3961 tgaggttgcc ataaatatgt aagtgtctt tccctcgcat ccaagtagct catagaaacg
4021 gattaaacga aaaacgactt gacaaactcc gccagctccc ttataatgac aataagggtg
4081 tttatgactc aaaacttggt tttgacctgc aggtcgaatg acaaaaattc gtaaaaaact
4141 tagggtatth attggcggat tacataaaat tatagcggct gcatgtcttt ttattttttc
4201 tacattcagc caaatcgcgc ttatttttaag cgttagcaca ttattacagc gccacttaca
4261 gtaatataga gtcaaaaact gctactcggg gcttcttttg cttttttttc atttggtaaa
4321 tttcttaatg tttatagctc aaagagaggt gtcattccag cacttgatgc tggaatccag
4381 gaattttatc aagtataaaa gttatgttaa aatgcaccat ttatggaaaa ctagatccca
4441 gtgtctgggc actgggatga catcataggg gcaactggat gacacccttt cctagatgga
4501 gataaattac aatgtttgta cagttatggg attgcgcagt ggatgcagtt taacataaaa
4561 agctttgctt tttgaaattt tgggttatac gcaacttcaa cactattagc aggggtaatg
4621 atcatgaata aagaagaagc tttaaaaatt ttggaaacta cagatagcca tgacgttatc
4681 tctaaagcca gaaagaaatt atttgatagt gaaaaaaact cagatgtatt aaaaacgcag
4741 atcgaggcat ataaatcgct taccgat

```

//

LOCUS JAQZAU010000147 2076 bp dna linear ENV 17-MAR-2023  
DEFINITION MAG: Wolbachia pipientis isolate wEsol contig\_12111, whole genome

shotgun sequence.

ACCESSION JAQZAU010000147 JAQZAU010000000

VERSION JAQZAU010000147.1

DBLINK BioProject: PRJNA929258  
BioSample: SAMN33142973

KEYWORDS WGS; ENV; Metagenome Assembled Genome; MAG.

SOURCE Wolbachia pipientis (insect metagenome)

ORGANISM Wolbachia pipientis  
Bacteria; Pseudomonadota; Alphaproteobacteria; Rickettsiales;  
Anaplasmataceae; Wolbachieae; Wolbachia.

REFERENCE 1 (bases 1 to 2076)

AUTHORS Fiutek,N., Couger,B.M., Roy,S., de la Torre,J.R. and Connor,E.F.

TITLE Genomic assessment of the contribution of the Wolbachia  
endosymbiont of Eurosta solidaginis to gall-induction

JOURNAL International Journal Molecular Sciences

REFERENCE 2 (bases 1 to 2076)

AUTHORS Fiutek,N., Couger,B.M., Roy,S., de la Torre,J.R. and Connor,E.F.

TITLE Direct Submission

JOURNAL Submitted (10-FEB-2023) Biology, San Francisco State University,  
1600 Holloway Ave, San Francisco, CA 94132, USA

COMMENT ##Genome-Assembly-Data-START##  
Assembly Date :: JUN-2019  
Assembly Method :: FLYE v. 06-2019  
Genome Representation :: Full  
Expected Final Version :: Yes  
Genome Coverage :: 100.0x  
Sequencing Technology :: Illumina HiSeq; PacBio Sequel  
##Genome-Assembly-Data-END##

FEATURES Location/Qualifiers

source 1..2076  
/organism="Wolbachia pipientis"  
/mol\_type="genomic DNA"  
/submitter\_seqid="contig\_12111"  
/isolate="wEsol"  
/isolation\_source="galls on Solidago altissima"  
/host="Eurosta solidaginis MN-2018-EFC"  
/db\_xref="taxon:955"  
/environmental\_sample  
/country="USA: Cowling Arboretum, Carleton College,  
Northfield, MN"  
/lat\_lon="44.48 N 93.13 W"  
/altitude="280 m"  
/collection\_date="2018-11"  
/metagenome\_source="insect metagenome"  
/note="metagenomic"

gene 354..770  
/locus\_tag="wEsol\_01653"

CDS 354..770  
/locus\_tag="wEsol\_01653"  
/codon\_start=1  
/transl\_table=11  
/pfam="RNA\_pol\_Rpb6"  
/fullproduct="qcoverage 100 , hcoverage 100 , similarity  
100 , identity 100 , eval 2.93e-80 , alnlength 138 ,  
Bacteria;Eukaryota , Proteobacteria;Arthropoda ,  
MBV2146023.1 DNA-directed RNA polymerase subunit omega  
[Wolbachia endosymbiont of Pissodes strobil]"  
/translation="MAESIVEKCTEQVSNRFLVLLASQRTDHLNTGASNPVQTVQFK  
DHKNTIVSLYEIAEKQVDTHLFLNLLVGRCKEYMKGNMNNVYSSNTSKLANLLNFSFG  
QFNTDLASQESQDYEVDGEIDDEINDQDGDEEVSV"

```

        /product="DNA-directed RNA polymerase
        subunit omega"
        /besthit="qcoverage 100 , hcoverage 100 , similarity 100
        , identity 100 , evalue 2.93e-80 , alnlength 138 ,
        Bacteria;Eukaryota , Proteobacteria;Arthropoda ,
        MBV2146023.1 DNA-directed RNA polymerase subunit omega
        [Wolbachia endosymbiont of Pissodes strobi]"
gene      799..1044
        /locus_tag="wEsol_01654"
CDS       799..1044
        /locus_tag="wEsol_01654"
        /codon_start=1
        /transl_table=11
        /fullproduct="qcoverage 100 , hcoverage 100 , similarity
        100 , identity 100 , evalue 4.08e-40 , alnlength 81 ,
        Bacteria , Proteobacteria , WP_082860906.1 multiple
        resistance and pH regulation protein F (MrpF / PhaF)
        superfamily [Wolbachia pipientis]"
        /cog="MnhF COG2212 89 Multisubunit Na+/H+ antiporter,
        MnhF subunit"
        /pfam="MrpF_PhaF"
        /product="multiple resistance and pH
        regulation protein F (MrpF / PhaF) superfamily"
        /translation="MLHIAIYTLLFCMSIMLCRIVSKSSDVYNKVLAFNNFSTQVVVL
        ITAISIIILNNFFLIDIALLYASVSFISTIALMRLMLF"
        /besthit="qcoverage 100 , hcoverage 100 , similarity 100
        , identity 100 , evalue 4.08e-40 , alnlength 81 ,
        Bacteria , Proteobacteria , WP_082860906.1 multiple
        resistance and pH regulation protein F (MrpF / PhaF)
        superfamily [Wolbachia pipientis]"
gene      1051..1338
        /locus_tag="wEsol_01655"
CDS       1051..1338
        /locus_tag="wEsol_01655"
        /codon_start=1
        /transl_table=11
        /fullproduct="qcoverage 100 , hcoverage 100 , similarity
        100 , identity 100 , evalue 4.32e-55 , alnlength 95 ,
        Bacteria , Proteobacteria , WP_096617042.1 monovalent
        cation/H(+) antiporter subunit G [Wolbachia pipientis]"
        /cog="MnhG COG1320 113 Multisubunit Na+/H+ antiporter,
        MnhG subunit"
        /pfam="PhaG_MnhG_YufB"
        /tigr="TIGR01300 CPA3_mnhG_phaG 97 monovalent
        cation/proton antiporter, MnhG/PhaG subunit"
        /product="monovalent cation/H(+)
        antiporter subunit G"
        /translation="MIGSVLIFLGICSVIISSVGVIRFPDFYTRLHAAGITDSSGATL
        LLIGFALQNGFSINTVKIILLILIIWVASSTNGYILARTYYKVKKKTVKEG"
        /besthit="qcoverage 100 , hcoverage 100 , similarity 100
        , identity 100 , evalue 4.32e-55 , alnlength 95 ,
        Bacteria , Proteobacteria , WP_096617042.1 monovalent
        cation/H(+) antiporter subunit G [Wolbachia pipientis]"
gene      1340..1621
        /locus_tag="wEsol_01656"
CDS       1340..1621
        /locus_tag="wEsol_01656"
        /codon_start=1
        /transl_table=11
        /product="hypothetical protein"

```

/pfam="DUF4040"  
 /tigr="TIGR00940 2a6301s01 793 monovalent cation:proton  
 antiporter"  
 /translation="MLEILNVVLLLLLLLTVTVFIVFSRHLVVSAVLMCVFSSLIALIY  
 LIMNAPDVAITEASVGAGLSTIFTFAALSLIKNHKVNLSHNPITLFILS"  
 /cog="COG1563 COG1563 87 Predicted subunit of the  
 Multisubunit Na<sup>+</sup>/H<sup>+</sup> antiporter"  
 /besthit="qcoverage 96.7741935483871 , hcoverage  
 51.4285714285714 , similarity 100 , identity 100 , eval  
 3.82e-44 , alnlength 90 , Bacteria , Proteobacteria ,  
 WP\_164224943.1 DUF4040 domain-containing protein  
 [Wolbachia pipientis]"

# ORIGIN

```

1 tacaaccgat cccctcgctt cttcatgtac cacatgactc acaccatatt taatactagc
61 ttaccaactc ataaccacta agcattggct aaacggcctt tgcagcctga caacttggtg
121 ttgatcagcc aaaggatatca caaattaaaa atggtaaaat agatgggttt tcttttagagc
181 gattgttagg atttctaaaa aaacttgatc atgaaataac aatcacgatg acagaaagcc
241 aagaaataaa atctgaggca gaaaaagtaa aacatgaagt tgaatcgcaa tagatacaaa
301 gttgacaact tgttttttgt gatatagtat aaaacttatt aaggtagtat cttatggctg
361 agtctattgt agaaaagtgt acagaacagg taagtaaccg tttcaaattg gttctattgg
421 caagtcaaag aacacatgat ttaaatacag gagcaagtaa tccagttcaa acagttcagt
481 ttaaagacca taaaaacacc atagtttcct tatatgaaat agcagaaaaa caggtaggata
541 ctcatgagct atttaaccct ttggtaggta gatgcaagga gtacatgaaa ggaaatatga
601 ataatgttta cagcagtaat acaagtaagc tagcgaattt attaaatttt tctgatggtc
661 aatttaacac agatcttgat gcaagtcaag aaagccaaga ttatgaagtg gatggtgaaa
721 tagatgatga aataaatgat caagatggcg atgaagaagt atccgtttag aaatctactg
781 aagttacata gtcttttaaat gcttcacatt gctatctata cactgttggt ctgtatgagt
841 ataatgttgt gccgcatagt gtctaagtca agtgatgtgt acaataagggt tttagcggtc
901 aataatttct caacgcaagt agttgtactc ataacagcaa tatcaatcat tctgaataat
961 ttttttttaa ttgatatagc attggtgtat gctagcggtt gctttatatc aactatagca
1021 ctaatgagat taatgttggt ttaataattt atgataggat ccgttcttat attttttaggc
1081 atttgttcag taatcatttc aagtgtggga gtaattagat ttcctgattt ctatactagg
1141 ttacatgcag caggatttac agattctagc ggtgcaacgc tattgttaat tgggtttgct
1201 ttgcagaatg gattttcaat caatactggt aaaataatat tattaattct tataatatgg
1261 gtagctagct caactaatgg ctatatttta gcgcgcactt attataaagt taagaaaaaa
1321 actgttaaag aagggttaag tgtagaaaat attaaatgta gtgctacttt tgttggtact
1381 aacagttacg gttttttatag tcttctcgcg acatttagtc gtaagtgtgt ttctaagtgt
1441 tgtatttagt tcacttattg cgcttatata cttaattatg aatgcacctg atgttgcaat
1501 tactgaagct tctgttggtg cggggctcag tacgattttt acgtttgcag cactctcctt
1561 gataaagaat cataaagtaa atctatctca taaccctata acgcttttta tactcagttg
1621 agcacagctc acagagtata ttaagtttga ttggataacg gttggttgta catatataaa
1681 ggaatcgaga tagatataga cttccatata tcaaaataat caggatccaa aaaaaatttg
1741 attgagccat gtccgtccgt ccgtccgtcc gtccgtccgt ccgttaacac gataacttga
1801 gtaaattttg aggtatcttg atgaaatttg gtatgtagggt tcctgagcac tcatctcaga
1861 tcgctattta aaatgaacga tatcggacta taaccacgcc cactttttcg atatcgaaaa
1921 tttcgaaaaa ccgaaaaaat gcgataattc attgccaaat gcggttaaag cgatgaaact
1981 tggtagatgg gttgacgtta tgacgcagaa tagaaaatta gtaagatttt ggacaatggg
2041 cgtggcaccg cccactttta caagaaggta atttaa
  
```

//

LOCUS JAQZAU010000148 2076 bp dna linear ENV 17-MAR-2023  
 DEFINITION MAG: Wolbachia pipientis isolate wEsol contig\_1398, whole genome  
 shotgun sequence.  
 ACCESSION JAQZAU010000148 JAQZAU010000000  
 VERSION JAQZAU010000148.1  
 DBLINK BioProject: PRJNA929258  
 BioSample: SAMN33142973  
 KEYWORDS WGS; ENV; Metagenome Assembled Genome; MAG.  
 SOURCE Wolbachia pipientis (insect metagenome)  
 ORGANISM Wolbachia pipientis  
 Bacteria; Pseudomonadota; Alphaproteobacteria; Rickettsiales;

Anaplasmataceae; Wolbachieae; Wolbachia.

REFERENCE 1 (bases 1 to 2076)

AUTHORS Fiutek,N., Couger,B.M., Roy,S., de la Torre,J.R. and Connor,E.F.

TITLE Genomic assessment of the contribution of the Wolbachia endosymbiont of Eurosta solidaginis to gall-induction

JOURNAL International Journal Molecular Sciences

REFERENCE 2 (bases 1 to 2076)

AUTHORS Fiutek,N., Couger,B.M., Roy,S., de la Torre,J.R. and Connor,E.F.

TITLE Direct Submission

JOURNAL Submitted (10-FEB-2023) Biology, San Francisco State University, 1600 Holloway Ave, San Francisco, CA 94132, USA

COMMENT ##Genome-Assembly-Data-START##

Assembly Date :: JUN-2019

Assembly Method :: FLYE v. 06-2019

Genome Representation :: Full

Expected Final Version :: Yes

Genome Coverage :: 100.0x

Sequencing Technology :: Illumina HiSeq; PacBio Sequel

##Genome-Assembly-Data-END##

FEATURES

source Location/Qualifiers

1..2076

/organism="Wolbachia pipientis"

/mol\_type="genomic DNA"

/submitter\_seqid="contig\_1398"

/isolate="wEsol"

/isolation\_source="galls on Solidago altissima"

/host="Eurosta solidaginis MN-2018-EFC"

/db\_xref="taxon:955"

/environmental\_sample

/country="USA: Cowling Arboretum, Carleton College, Northfield, MN"

/lat\_lon="44.48 N 93.13 W"

/altitude="280 m"

/collection\_date="2018-11"

/metagenome\_source="insect metagenome"

/note="metagenomic"

gene 813..926

/locus\_tag="wEsol\_01657"

CDS 813..926

/locus\_tag="wEsol\_01657"

/codon\_start=1

/transl\_table=11

/fullproduct="qcoverage 100 , hcoverage 100 , similarity 100 , identity 100 , evalue 5.60e-17 , alnlength 37 , Bacteria , Proteobacteria , ONI57984.1 putative membrane protein [Wolbachia pipientis wVitA]"

/translation="MTNKKLLNDKINAFVLIVYILALYNSKGYFKWEMLF"

/product="putative membrane protein"

/besthit="qcoverage 100 , hcoverage 100 , similarity 100 , identity 100 , evalue 5.60e-17 , alnlength 37 , Bacteria , Proteobacteria , ONI57984.1 putative membrane protein [Wolbachia pipientis wVitA]"

gene 908..1510

/locus\_tag="wEsol\_01658"

CDS 908..1510

/locus\_tag="wEsol\_01658"

/codon\_start=1

/transl\_table=11

/fullproduct="qcoverage 100 , hcoverage 100 , similarity 100 , identity 100 , evalue 5.98e-135 , alnlength 200 ,

Bacteria , Proteobacteria , WP\_010082495.1 MULTISPECIES:  
DUF1013 domain-containing protein [Wolbachia]"  
/cog="COG3820 COG3820 230 Uncharacterized protein  
conserved in bacteria"  
/pfam="DUF1013"  
/product="DUF1013  
domain-containing protein"  
/translation="MGDAFLMSMESSKGNNDNRNKQFLVQIAAWLVDNTGLTFNQIAQC  
CRLALEEVQDIADEEIEVEKYNPIISGIITEKEIDDCKKNPNRVPNLIKNIKKRSKA  
IGSILGFASTARRRDKPDAIYYLVKKFPILDNNVIAKLITSTNYTVEQVRDGS HHNMQ  
NIKPQDPVLLGLCSQENLEAEVEKAKVEEEKQERLKKYKE"  
/besthit="qcoverage 100 , hcoverage 100 , similarity 100  
, identity 100 , evaluate 5.98e-135 , alnlength 200 ,  
Bacteria , Proteobacteria , WP\_010082495.1 MULTISPECIES:  
DUF1013 domain-containing protein [Wolbachia]"

gene

CDS

1710..>2076  
/locus\_tag="wEsol\_01659"  
1710..>2076  
/locus\_tag="wEsol\_01659"  
/codon\_start=1  
/transl\_table=11  
/product="hypothetical protein"  
/pfam="Rho\_N Rho\_RNA\_bind"  
/translation="MTTINEDVLAKGKVTAQPEKSEQIYNNDTVKQMVNEGTEKNRKT  
LDLSELKEKTAEELELAEERKISTNGKSNGRMLKQEIIIFSLMKKMSEEGGITGSGI  
VEILPDGFGFLRSASANYAP"  
/besthit="qcoverage 100 , hcoverage 27.2930648769575 ,  
similarity 100 , identity 100 , evaluate 3.15e-70 ,  
alnlength 122 , Eukaryota , Arthropoda , XP\_044573852.1  
transcription termination factor Rho 1-like isoform X2  
[Drosophila ananassae]"

ORIGIN

```

1 atgggatcct caggttactt tacaatatca acccactcta gtttggtatc gaattttgta
61 tatactgcct catcaactct ctgcctcaaaa atttaccgaa taattatcct aaataacgaa
121 gtcattgaaca tcattgcagg caggactttc tctagctttg ctatatactc tttctctgtc
181 atatgcagggt catttagcgt ttcattagatt tatTTTTgtc aaattcacct ttatcatttt
241 gaaagtattt ggtgttttta tatggttttt tatagattct tctccaactg tcaacccag
301 ctactagtt aggttaaaca ataggttttg ctctataagt gcgttaagca aatcatattt
361 cagcttttta cttgttctct actcgcatca gatccagaaa tttgcttttc ataattttga
421 tatagtgatt tatactcatc tgacattata acttcttttc caaccctagc tacctctctt
481 tttcatcatc acctgataaa aggttgccaa ttccatgaag attaacaagc aagctaaaag
541 gacaacggtt acttttagtga aaaaatttta acattcattt taaaccagtt aattaatgat
601 taattataga atagtgataa tttaatgctt gtaaacctgt tgctttatta gctaatatat
661 ataataattac aatatattaa cttaaaatta actctctaata cttaaataagg aacatatggt
721 taactgagtt atactatacc ttaggaaggg gaaatatttt gtttgaaata tgcttaaagg
781 taagcgcatt taattaactt aagaggcggg aaatgacaaa caaaaagtta ttgaatgaca
841 aaattaatgc ttttttagtt ttaatagttt atatttttagc tctgtataac agtaagggat
901 actttaaatg ggagatgctt ttttgatgtc aatggaatct tctaagggca ataacgatag
961 aaataaacag tttctagtgc aaatagctgc ttggttagta gacaacactg gtttaacttt
1021 taatcaaata gcacaatgtt gcagattggc ccttgaagaa gtacaagaca tagctgatga
1081 ggaaatagaa gtagaaaaat ataaccctat tatttctgga ataattactg aaaaagaaat
1141 cgatgattgc aaaaaaaatc caaatcgtgt accaaatttg attataaaaa atataaaaaa
1201 aaggagtaaa gcgattggta gcattcttgg ctttgccctc acggcaagac gtagagataa
1261 acctgatgag atttattatt tagtaaaaaa atttcctatc ttggacaata acgttatagc
1321 taaattaatt agtacaacaa attacacagt tgagcaggta agagatggat ctcatcataa
1381 catgcaaaat ataaaacccc aagatcctgt actactcggc ttatgtagtc aagaaaattt
1441 agaagcagaa gtggaaaaag caaaagtaga agaggagaag caagaaagggt taaaaaataa
1501 taaagaatag ctattgaaaa tcctcaaatt tttgtgcttt gtttaacatta aattaacttg
1561 acttgctagt gtttattagt ataatgtaag taaagtacgg ggtttaatga taattaagct
1621 taatacgcac tgaaactaac tcagcctaatt ttattatcct atagtcacat tttagggttag

```

```

1681 taagcatcaa ttaaaatttt tggaggatta tgacaacaat caatgaagat gttttggcaa
1741 aaggaaaggt tacagctcaa cctgaaaaaa gtgagcaaat ttacaataac gatacagtaa
1801 aacagatggt caatgaaggt actgagaaaa acagaaaaaac attagatctg agcgaattaa
1861 aagagaaaac agcagaagaa ttgttagagt tagctgaaga aagaaaaatt tcaactaacg
1921 gtaaaagcaa tggtagaatg ctaaagcagg aaataatatt cagcttaatg aaaaaaatga
1981 gtgaagaagg aggcataacc acagggagtg gaatagtgga aatattgcct gatggttttg
2041 gtttcttacg ttcagcaagt gcaaattatg ccccaa

```

//

```

LOCUS      JAQZAU010000149          11607 bp    dna        linear    ENV 17-MAR-2023
DEFINITION MAG: Wolbachia pipientis isolate wEsol contig_20779, whole genome
            shotgun sequence.
ACCESSION  JAQZAU010000149  JAQZAU010000000
VERSION    JAQZAU010000149.1
DBLINK     BioProject: PRJNA929258
            BioSample: SAMN33142973
KEYWORDS   WGS; ENV; Metagenome Assembled Genome; MAG.
SOURCE     Wolbachia pipientis (insect metagenome)
ORGANISM   Wolbachia pipientis
            Bacteria; Pseudomonadota; Alphaproteobacteria; Rickettsiales;
            Anaplasmataceae; Wolbachieae; Wolbachia.
REFERENCE  1  (bases 1 to 11607)
AUTHORS    Fiutek,N., Couger,B.M., Roy,S., de la Torre,J.R. and Connor,E.F.
TITLE      Genomic assessment of the contribution of the Wolbachia
            endosymbiont of Eurosta solidaginis to gall-induction
JOURNAL    International Journal Molecular Sciences
REFERENCE  2  (bases 1 to 11607)
AUTHORS    Fiutek,N., Couger,B.M., Roy,S., de la Torre,J.R. and Connor,E.F.
TITLE      Direct Submission
JOURNAL    Submitted (10-FEB-2023) Biology, San Francisco State University,
            1600 Holloway Ave, San Francisco, CA 94132, USA
COMMENT    ##Genome-Assembly-Data-START##
            Assembly Date          :: JUN-2019
            Assembly Method        :: FLYE v. 06-2019
            Genome Representation  :: Full
            Expected Final Version :: Yes
            Genome Coverage        :: 100.0x
            Sequencing Technology  :: Illumina HiSeq; PacBio Sequel
            ##Genome-Assembly-Data-END##
FEATURES   Location/Qualifiers
            source                1..11607
                                   /organism="Wolbachia pipientis"
                                   /mol_type="genomic DNA"
                                   /submitter_seqid="contig_20779"
                                   /isolate="wEsol"
                                   /isolation_source="galls on Solidago altissima"
                                   /host="Eurosta solidaginis MN-2018-EFC"
                                   /db_xref="taxon:955"
                                   /environmental_sample
                                   /country="USA: Cowling Arboretum, Carleton College,
                                   Northfield, MN"
                                   /lat_lon="44.48 N 93.13 W"
                                   /altitude="280 m"
                                   /collection_date="2018-11"
                                   /metagenome_source="insect metagenome"
                                   /note="metagenomic"
            gene                  <1..239
                                   /locus_tag="wEsol_01660"
            CDS                   <1..239
                                   /locus_tag="wEsol_01660"
                                   /codon_start=1

```

```

/transl_table=11
/product="hypothetical protein"
/pfam="vATP-synt_E"
/translation="LISQHIGVFRNHVKRKVDDLIDSLEKGLEKLENVEEDTEEYGEI
ENELIDERSEVMNELRCLVLSYALFEETHEQRNP"
/besthit="qcoverage 100 , hcoverage 45.3488372093023 ,
similarity 100 , identity 100 , evalue 7.60e-44 ,
alnlength 78 , Bacteria , Proteobacteria , WP_197907407.1
hypothetical protein [Wolbachia endosymbiont of Kradibia
gibbosae]"
gene 514..786
/locus_tag="wEsol_01661"
CDS 514..786
/locus_tag="wEsol_01661"
/codon_start=1
/transl_table=11
/fullproduct="qcoverage 100 , hcoverage 100 , similarity
100 , identity 100 , evalue 5.39e-58 , alnlength 90 ,
Bacteria , Proteobacteria , WP_174516737.1 AAA family
ATPase [Wolbachia endosymbiont of Cardiocondyla
obscurior]"
/cog="RepA COG3598 402 RecA-family ATPase"
/pfam="AAA_25"
/product="AAA family ATPase"
/translation="MIKAIDCSKWVGSPPEKEFIIQDWLSLGEVSFLKGEREVGKSL
AQQLMTSVATGKPLLNDVQVKAYGVFCESSKRDIIRQCMSLPS"
/besthit="qcoverage 100 , hcoverage 100 , similarity 100
, identity 100 , evalue 5.39e-58 , alnlength 90 ,
Bacteria , Proteobacteria , WP_174516737.1 AAA family
ATPase [Wolbachia endosymbiont of Cardiocondyla
obscurior]"
gene 848..1192
/locus_tag="wEsol_01662"
CDS 848..1192
/locus_tag="wEsol_01662"
/codon_start=1
/transl_table=11
/pfam="AAA_25"
/fullproduct="qcoverage 100 , hcoverage 100 , similarity
100 , identity 100 , evalue 7.00e-81 , alnlength 114 ,
Bacteria , Proteobacteria , WP_174516738.1 MULTISPECIES:
hypothetical protein [unclassified Wolbachia]"
/translation="MIFNDKGIGFTPPFFHELFDIQLFQPKLVVLDTISDLFGGDPL
HLKQFMDGCCAHIAKTLNCAVLVCEHDSSITICDDRNVHLSMLEEVKDERTLYCGSS
HLLRYQNGVFVI"
/product="hypothetical protein"
/besthit="qcoverage 100 , hcoverage 100 , similarity 100
, identity 100 , evalue 7.00e-81 , alnlength 114 ,
Bacteria , Proteobacteria , WP_174516738.1 MULTISPECIES:
hypothetical protein [unclassified Wolbachia]"
gene 1194..1670
/locus_tag="wEsol_01663"
CDS 1194..1670
/locus_tag="wEsol_01663"
/codon_start=1
/transl_table=11
/pfam="RuvC"
/fullproduct="qcoverage 100 , hcoverage 100 , similarity
100 , identity 100 , evalue 1.83e-113 , alnlength 158 ,
Bacteria , Proteobacteria , WP_174516739.1 MULTISPECIES:

```

```

Holliday junction resolvase [unclassified Wolbachia]"
/translation="MSILTLDLGKQTGWAILTDGVIQSGSENFHGSRFSGGGMHFLNF
RRWLNEMRERFSDIEAVYFEEVRRHLGTDAAHCYGGFLAHLTAWCEENNIPIYQGV PVK
TIKRFITGKGNASKSEVIEAVKGKGFIPQDDNEADALALMLCVNNFSKDFNMLDNT"
/product="Holliday junction
resolvase"
/besthit="qcoverage 100 , hcoverage 100 , similarity 100
, identity 100 , evalue 1.83e-113 , alnlength 158 ,
Bacteria , Proteobacteria , WP_174516739.1 MULTISPECIES:
Holliday junction resolvase [unclassified Wolbachia]"
gene 1812..3044
/locus_tag="wEsol_01664"
CDS 1812..3044
/locus_tag="wEsol_01664"
/codon_start=1
/transl_table=11
/pfam="ParBc Pfam-B_13714 N6_N4_Mtase UPF0020
Methyltransf_26"
/fullproduct="qcoverage 99.2682926829268 , hcoverage
99.2682926829268 , similarity 99.3 , identity 98.0 ,
evalue 5.28e-298 , alnlength 407 , Bacteria ,
Proteobacteria , WP_174516740.1 MULTISPECIES: DNA
modification methylase [unclassified Wolbachia]"
/translation="MNLAIHYYP IENLVEYERNPRKNDDVVNRMCASIREFGFRIP I V
AKSDGTVVDGHLRLKAARKLGME SIPVVLSDNLSEAQT KAFRL LANQSANWAKWDDDL
LKLEIQELEDLEFDLKMTGFELEK VQRFLDNIDGKEEVERGEKEGVELVDKKS VVSKP
GDLWILGGHRIYCGD SCLVESFKAVLDDKMADITVCDPPYNLAYGDSQEREDKKILND
DQGEKYELFLYDICS HVLAYTKGAIYICASSSELATLQKV FEEAGGRWSTFIIWAKNH
FTLGRSDYQRQYETILYGWKNGNKREWHGGRNQSDLWFYDKPTYNSLHPTMKPVELME
RAIVNSSGPGDIVLDPFSGSGSTLIACERTGRICRTIELDPTFVDVTIKRWQVYTGRE
AILSNTGKTFAQIQEEKR"
/product="DNA modification
methylase"
/besthit="qcoverage 99.2682926829268 , hcoverage
99.2682926829268 , similarity 99.3 , identity 98.0 ,
evalue 5.28e-298 , alnlength 407 , Bacteria ,
Proteobacteria , WP_174516740.1 MULTISPECIES: DNA
modification methylase [unclassified Wolbachia]"
gene 3061..3555
/locus_tag="wEsol_01665"
CDS 3061..3555
/locus_tag="wEsol_01665"
/codon_start=1
/transl_table=11
/pfam="MarR_2"
/fullproduct="qcoverage 100 , hcoverage 100 , similarity
98.2 , identity 97.0 , evalue 2.64e-100 , alnlength 164 ,
Bacteria , Proteobacteria , WP_174516746.1 MULTISPECIES:
hypothetical protein [unclassified Wolbachia]"
/translation="MEGGKITQTEWARELGVSKQYVCYLVKKGIVELEDGLIDREQAN
RAIEAIRDPSQPLRRKGEEGEKRGNNDLSTMLLKTRIKNEMERGKLL EAKAKAEIGE
LISVEEVKTEAFNVARVVRNLLNIPDRVSALLASINNTEKIHETLTTEEIRTALEELT
QSVF"
/product="hypothetical protein"
/besthit="qcoverage 100 , hcoverage 100 , similarity 98.2
, identity 97.0 , evalue 2.64e-100 , alnlength 164 ,
Bacteria , Proteobacteria , WP_174516746.1 MULTISPECIES:
hypothetical protein [unclassified Wolbachia]"
gene 3555..3722
/locus_tag="wEsol_01666"

```

CDS 3555..3722  
 /locus\_tag="wEsol\_01666"  
 /codon\_start=1  
 /transl\_table=11  
 /product="hypothetical protein"  
 /translation="MMTYNLRSLKKLLMSLVSLTHILIVILILSKASADTYCRQKIPL  
 FLLKSATIAAL"  
 /besthit="qcoverage 78.1818181818182 , hcoverage  
 72.8813559322034 , similarity 83.7 , identity 67.4 ,  
 evalue 1.18e-08 , alnlength 43 , Bacteria ,  
 Proteobacteria , WP\_187296848.1 hypothetical protein  
 [Wolbachia pipientis]"

gene 3719..5536  
 /locus\_tag="wEsol\_01667"

CDS 3719..5536  
 /locus\_tag="wEsol\_01667"  
 /codon\_start=1  
 /transl\_table=11  
 /fullproduct="qcoverage 100 , hcoverage 100 , similarity  
 100 , identity 100 , evalue 0.0 , alnlength 605 ,  
 Bacteria , Proteobacteria , WP\_197907406.1 phage  
 terminase large subunit family protein [Wolbachia  
 endosymbiont of Kradibia gibbosae]"  
 /cog="COG5525 COG5525 611 Phage terminase, large subunit  
 GpA"  
 /pfam="Terminase\_GpA"  
 /product="phage terminase large subunit  
 family protein"  
 /translation="MIYSSSFYAGLRPDPLKVSEWADKNRQLSTIASSEPGKWRT  
 ETPYLKEIMDSLSSSSPAEKVVFMKGAQIGGTEAGNNWIGYIIDQTPGPMLVVQPTVEM  
 GKRWSKGRFAPLIEDTPCLRSKIKDPRSRSRDSGNTVQSKEFPGGTVVVTGANS  
 PVGLRSMPVRYLFLDEVDPGDGSGGEGDPVLLSIARTNTFTRRKIFLVSTPTVH  
 GISRIEKEFENSDKRYFFVPCPHCDHYQVLKWPQIKWKDKDPSTAHYVCIECR  
 GEIKNHQKTEMLARGEWRPTNPIKGEKKGFHLSSLYSPVGWYSWKQAVEDFLHAK  
 ENEQLLKVWINTTLGETWVDKGEVPDWKQLFERRENFPITGTVPKGGKIVLTAGV  
 DVQKDRLEAEVVAWGMGRESWSIDYQVLEGDTGSGEVWEKLSELLNHHFIGEN  
 GLEYMISMMAVDAGYATQEVYNWVRGHQGSGRVMVKGANKALVPLSSPSRVDV  
 TVSGQKLKRGMKLWPGVGSILKSELFQLLNVLKNPGYCHFPEYPPEYFKQLTAE  
 QQLITKVVKGYTKQEWQKIRDRNEVLDCRVYARAASIALGIDRWPESKWESLVGE  
 KTKKSKRVRRSQWLSEKS"  
 /besthit="qcoverage 100 , hcoverage 100 , similarity 100  
 , identity 100 , evalue 0.0 , alnlength 605 , Bacteria ,  
 Proteobacteria , WP\_197907406.1 phage terminase large  
 subunit family protein [Wolbachia endosymbiont of  
 Kradibia gibbosae]"

gene 5536..5760  
 /locus\_tag="wEsol\_01668"

CDS 5536..5760  
 /locus\_tag="wEsol\_01668"  
 /codon\_start=1  
 /transl\_table=11  
 /pfam="gpW"  
 /fullproduct="qcoverage 100 , hcoverage 100 , similarity  
 100 , identity 100 , evalue 4.30e-41 , alnlength 74 ,  
 Bacteria , Proteobacteria , WP\_174516742.1 MULTISPECIES:  
 hypothetical protein [unclassified Wolbachia]"  
 /translation="MYNQEYLTQVEEAIKKLQSGERVVSIAYGDHVVRYGEVQIKDL  
 LDLRQRIKSELKVAGVKPKRKIVIATSKGVI"  
 /product="hypothetical protein"  
 /besthit="qcoverage 100 , hcoverage 100 , similarity 100  
 , identity 100 , evalue 4.30e-41 , alnlength 74 ,

Bacteria , Proteobacteria , WP\_174516742.1 MULTISPECIES:  
 hypothetical protein [unclassified Wolbachia]"  
 gene 5757..6449  
 /locus\_tag="wEsol\_01669"  
 CDS 5757..6449  
 /locus\_tag="wEsol\_01669"  
 /codon\_start=1  
 /transl\_table=11  
 /fullproduct="qcoverage 100 , hcoverage 100 , similarity  
 99.6 , identity 99.6 , evalue 3.73e-171 , alnlength 230 ,  
 Bacteria , Proteobacteria , WP\_174516743.1 glycoside  
 hydrolase family 25 protein [Wolbachia endosymbiont of  
 Cardiocondyla obscurior]"  
 /cog="Acm COG3757 269 Lysozyme M1  
 (1,4-beta-N-acetylmuramidase)"  
 /pfam="Glyco\_hydro\_25"  
 /product="glycoside hydrolase family 25  
 protein"  
 /translation="MRSYMMENEYPDFLEHLKYIIATGTPGMLVNAIIDISHWNKSVD  
 FKLVKEDGIVGIIHKATQGVKYIDPEYAKRRKAAEEEEELLWGAYHFGVGEKSGKDQTD  
 HFLETIGDSSSILLALDIEENKDGKSITAKQAEDFVNRVYVVTGRLPLIYGSPYFLKD  
 FATPILTECPLWLSKWGAEP TLP IGWKKWTLWQYTDGKTGPKPNSVEGIGSCDRNKFN  
 GTLEELKDFWIS"  
 /besthit="qcoverage 100 , hcoverage 100 , similarity 99.6  
 , identity 99.6 , evalue 3.73e-171 , alnlength 230 ,  
 Bacteria , Proteobacteria , WP\_174516743.1 glycoside  
 hydrolase family 25 protein [Wolbachia endosymbiont of  
 Cardiocondyla obscurior]"  
 gene 6449..7867  
 /locus\_tag="wEsol\_01670"  
 CDS 6449..7867  
 /locus\_tag="wEsol\_01670"  
 /codon\_start=1  
 /transl\_table=11  
 /fullproduct="qcoverage 100 , hcoverage 100 , similarity  
 99.8 , identity 99.8 , evalue 0.0 , alnlength 472 ,  
 Bacteria , Proteobacteria , WP\_174516747.1 MULTISPECIES:  
 phage portal protein [unclassified Wolbachia]"  
 /cog="COG5511 COG5511 492 Bacteriophage capsid protein"  
 /pfam="Phage\_portal\_2"  
 /tigr="TIGR01539 portal\_lambda 457 phage portal protein,  
 lambda family"  
 /product="phage portal  
 protein"  
 /translation="MLLKSFQQLFHKRPKPKGSVWDGAGSGRLLHFQPETGSINSL  
 SHSLETLSRSRDMVRKNSYAANIIDTIVSNCVGTGIKPQSKAKDAEFRKKVQELWLR  
 WTDEADSSGVSDFYGLQALVCRSMIEGGE CFVRLRTRKREDGLCVPLQLQVLESEHLD  
 NKSNTLANGNVIRNGIEFNRLGQREAYYLFREHPGEGSFGESVRVPANDVLHIYRPL  
 RPGQIRGV PWLSTVLLKLYELDQYDDAELVRKKTAA MFAGFITRLDPEANIMGEGESN  
 EQGVALSGLEPGTMQLLDPGEDIKFSEPSDVGGSYEAFMKQQLRAI AVGMGITYEQLT  
 GDLTG VNYSSIRAGLIEFRRCAMLQHN VVVFQFCRPVWCRWLELA ILSGELDISEKG  
 AKKVKWIAQGFDWV DPLKDQQAQQMAVRNGFKSRSEVVSELGYDIEEIDQEIAEDQRR  
 ASELGLSFDSDVSSFDSENTEII"  
 /besthit="qcoverage 100 , hcoverage 100 , similarity 99.8  
 , identity 99.8 , evalue 0.0 , alnlength 472 , Bacteria ,  
 Proteobacteria , WP\_174516747.1 MULTISPECIES: phage  
 portal protein [unclassified Wolbachia]"  
 gene 7864..8958  
 /locus\_tag="wEsol\_01671"  
 CDS 7864..8958

```

/locus_tag="wEsol_01671"
/codon_start=1
/transl_table=11
/pfam="CLP_protease Peptidase_S49"
/fullproduct="qcoverage 100 , hcoverage 100 , similarity
99.7 , identity 99.7 , evalule 7.95e-247 , alnlength 364 ,
Bacteria , Proteobacteria , WP_174516744.1 MULTISPECIES:
S49 family peptidase [unclassified Wolbachia]"
/translation="MTTQVSRNLKPMMEIQRSFDLLSLHAEKHPTFKNIKHAVRNSER
GIKVIPIHGILTKKSEAFDDVLGMTSYEKIREEEIEEALIDEEVETIILDIDSPGGEVN
SLFDLSDFIYEARGLKKIVAIANDDAYSAAAYAIASSAEKVLVTRTSGVGSIGVIAHI
DQSGFDEKQGIKYTTVFAGKRKNDLNPHEPITSESLESLSQEEVDRLYEMFVELVARNR
NLSTETIKSTEAGLYFGEKAIEIGLADEVITYSEFIDRRNNMSKAEFNYKGHTIDADE
LMEEKRIGYERCRKEVLEVIRLCNLSKMPEKIGEFIEQNVNAKQAQEILMSILAERT
KKTEILSTIPQNTPEDLMMQVARTRAQSGI"
/product="S49 family
peptidase"
/besthit="qcoverage 100 , hcoverage 100 , similarity 99.7
, identity 99.7 , evalule 7.95e-247 , alnlength 364 ,
Bacteria , Proteobacteria , WP_174516744.1 MULTISPECIES:
S49 family peptidase [unclassified Wolbachia]"
gene 9135..9542
/locus_tag="wEsol_01672"
CDS 9135..9542
/locus_tag="wEsol_01672"
/codon_start=1
/transl_table=11
/pfam="HDPD"
/fullproduct="qcoverage 100 , hcoverage 100 , similarity
100 , identity 100 , evalule 4.39e-85 , alnlength 135 ,
Bacteria , Proteobacteria , AGK87100.1 hypothetical
protein So0013 [Wolbachia endosymbiont of Ceratosolen
solmsi]"
/translation="MAVKLKGKKGEKFMSCITEQNNLGDLLKYEASNLYSRDQITVAK
GQNLKLGTVVGRDKDDLIIINLAATDGTQTAIGVITSDVNATETTKAVIITRIAMLA
DHAVVWPGNITEEQKAAAIKQLEARGIIIRKGV"
/product="hypothetical protein"
/besthit="qcoverage 100 , hcoverage 100 , similarity 100
, identity 100 , evalule 4.39e-85 , alnlength 135 ,
Bacteria , Proteobacteria , AGK87100.1 hypothetical
protein So0013 [Wolbachia endosymbiont of Ceratosolen
solmsi]"
gene 9594..10598
/locus_tag="wEsol_01673"
CDS 9594..10598
/locus_tag="wEsol_01673"
/codon_start=1
/transl_table=11
/pfam="Phage_cap_E"
/fullproduct="qcoverage 100 , hcoverage 100 , similarity
100 , identity 100 , evalule 8.95e-247 , alnlength 334 ,
Bacteria , Proteobacteria , WP_197907404.1 major capsid
protein [Wolbachia endosymbiont of Kradibia gibbosae]"
/translation="MQNPFTNPAFSMTELTAKAINILPINYGRTESLNLFPSRSVFRH
ITIEEQNGVLSLLPTQVPGAPATVGKRGKRKIRTFITPHIPHDDVVLPEEVQGIRAFG
SENELKALANVVTDHLELMRNKHAITLEHLRMGALKGIILDADGSELLNLYNEFEITP
KVVNFALGTATTDVKKCLEVLRHVEDNLSGEYMTGIHALVSPEFFDALTSKAVKEA
YERWQEGAALRNDRSGFTFCGITFEEYRGQATDPEGNVRRFIEKDTGHCFLGTAST
FTTYFAPADFNETVNTLGQPLYAKQEPFRFRDRTDLHTQSNPLPMCHRPRILTKIVAA
"

```

```

        /product="major capsid protein"
        /besthit="qcoverage 100 , hcoverage 100 , similarity 100
        , identity 100 , evalue 8.95e-247 , alnlength 334 ,
        Bacteria , Proteobacteria , WP_197907404.1 major capsid
        protein [Wolbachia endosymbiont of Kradibia gibbosae]"
gene      10772..11080
        /locus_tag="wEsol_01674"
CDS       10772..11080
        /locus_tag="wEsol_01674"
        /codon_start=1
        /transl_table=11
        /pfam="Pfam-B_106"
        /fullproduct="qcoverage 100 , hcoverage 100 , similarity
        100 , identity 100 , evalue 9.38e-69 , alnlength 102 ,
        Bacteria , Proteobacteria , WP_197907403.1 MULTISPECIES:
        hypothetical protein [unclassified Wolbachia]"
        /translation="MQGNIKRLLKDCFTHLGQQALYESKDKSYMVQVLKQQPDKLYGI
        GEGQFVGEMVFLEVSIFDVLQPVVGDTFIIDKRKYKVYSPPLRDNSGMLWKIQASGCV
        "

```

```

        /product="hypothetical protein"
        /besthit="qcoverage 100 , hcoverage 100 , similarity 100
        , identity 100 , evalue 9.38e-69 , alnlength 102 ,
        Bacteria , Proteobacteria , WP_197907403.1 MULTISPECIES:
        hypothetical protein [unclassified Wolbachia]"
gene      11071..>11607
        /locus_tag="wEsol_01675"
CDS       11071..>11607
        /locus_tag="wEsol_01675"
        /codon_start=1
        /transl_table=11
        /pfam="Pfam-B_12992 Pfam-B_14565 Minor_tail_Z"
        /fullproduct="qcoverage 91.0112359550562 , hcoverage
        95.2941176470588 , similarity 100 , identity 100 , evalue
        1.20e-101 , alnlength 162 , Bacteria , Proteobacteria ,
        WP_197907402.1 phage tail protein [Wolbachia endosymbiont
        of Kradibia gibbosae]"
        /translation="MRINIEITESIIQSVNAKKSIVELATMRALNKTALWIKSQAARE
        ISEEKKINLNVIRKRLRIFKAKTSRLDVLMRANLYDIRASAVGKMKQTRKGAKVGKHE
        FIGAFMAIMPRGNSGVFRREGRTALPIQEVKLALEPEASKIIKELVNYETEGIFEKYF
        ERRRAQTHYMDLSEKILF"
        /product="phage tail protein"
        /besthit="qcoverage 91.0112359550562 , hcoverage
        95.2941176470588 , similarity 100 , identity 100 , evalue
        1.20e-101 , alnlength 162 , Bacteria , Proteobacteria ,
        WP_197907402.1 phage tail protein [Wolbachia endosymbiont
        of Kradibia gibbosae]"

```

#### ORIGIN

```

1  gtctgatttc tcagcatata ggagttttta gaaatcacgt aaaacgcaaa gtagatgatt
61 tgattgactc actggaaaaa ggcttagaaa aattggaaaa cgtagaagag gatactgaag
121 aatatggaga gattgaaaac gagctaatag atgaaagaag tgaagtaatg aatgaattac
181 gttgttttagt gcttagctat gccctatttg aggagacaca tgaacaaaga aacccttaaa
241 agtctcttca aaagccaaat tatctacgct tacagtaact ataaaggtaa ggtaactttt
301 agttgtatga aaatTTTTTTT caaaaaaagt gaacagtttt tgtaaaattg gtgaatatat
361 ataatagcaa ggaattaact cctaattaag gtaggtagca taagattcct gttattgact
421 tacaaaaacc cattcatagc gtatttttgaa ggaaccagac gatatttagg aacttatgct
481 acaaacttaa atttaaatat ttttagtaat tttatgataa aagcaataga ttgttcaaaa
541 tgggttggtt cacctcccga aaaagaattc atcatacaag attggctttc cctaggagaa
601 gtatcatttc ttaaagggtga acgtgaagtt ggtaaatacac ttcttgctca acaattaatg
661 acatcggttg ctactggtaa gccattgctc aatatggatg tcaaacaggt taaagcatat
721 ggtgtatttt gtgagagcag taaacgagat ataatacgtc gtcagtgtat gtctttacca

```

|      |             |             |             |             |            |             |
|------|-------------|-------------|-------------|-------------|------------|-------------|
| 781  | agttgaagaa  | actttatattg | aaagccaaat  | acaaatcctt  | gcaagagaag | gagagaataa  |
| 841  | tttcttaatg  | atttttaacg  | ataaggggat  | aggagagttt  | acccctttct | ttcatgagct  |
| 901  | atgtgaagat  | attcaattgt  | ttcagccaaa  | gcttgtagtg  | ttagatacaa | tttcggattt  |
| 961  | atgtggtgga  | gaccctttac  | accttaagca  | gtttatggat  | ggctgctgtg | ctcatatagc  |
| 1021 | aaagacatta  | aactgcgctg  | ttttagtatg  | tgagcacgat  | tcaagcataa | ctatatgtga  |
| 1081 | tgatagagtc  | tggcacttgt  | ccatgttaga  | agaggtaaaa  | gatgaacgga | cgctatatgt  |
| 1141 | tgggggatca  | agccatttat  | tacgttatca  | aaatgggggt  | tttgtaattt | aggatgtcta  |
| 1201 | ttttaacact  | cgacctcggc  | aagcaaaccg  | gctgggcaat  | tctgacagat | ggagtaattc  |
| 1261 | aaagtgggag  | tgaaaacttt  | catggtagcc  | gtttcagcgg  | aggtggaatg | cacttcttaa  |
| 1321 | attttcgtag  | gtggctcaat  | gagatgaggg  | aaagattttc  | agatattgaa | gcagtgtatt  |
| 1381 | ttgaagaagt  | aagaagacat  | ttaggtactg  | acgctgcaca  | ttgctacgga | ggctttctag  |
| 1441 | ctcatttaac  | agcttggtgc  | gaggaaaaca  | atatacctta  | tcaaggtgta | cctgtcaaga  |
| 1501 | cgataaaaacg | ctttatcacc  | ggtaagggta  | atgcaagtaa  | aagtgaagtt | attgaagctg  |
| 1561 | taaagggaaa  | aggggtttatt | cctcaagatg  | ataatgaagc  | cgatgctttg | gcgttgatgc  |
| 1621 | tttgtgttaa  | taatttttagt | aaagatttta  | atatgctaga  | taacacatag | gaagtgggtc  |
| 1681 | ctttcggcca  | gactggcgga  | cttgggagcg  | aaaccccggg  | ccctctctag | cgtcagacgt  |
| 1741 | tttttaatta  | ttaacttttt  | aacaagtcct  | taagaatctc  | cactagtaat | ttaataaatt  |
| 1801 | attccactaa  | tatgaactta  | gcaatacact  | actatcctat  | tgaaaatcct | gtcgaatatg  |
| 1861 | agcgtaatcc  | tcgtaagaat  | gacgatgtag  | taaacagaat  | gtgcgcttca | atccgggagt  |
| 1921 | ttggttttcg  | tattccgata  | gttgcaaaaa  | gcgatggcac  | tgtggttgat | ggtcatttaa  |
| 1981 | gacttaaagc  | agcaagaaaa  | ctgggtatgg  | agagtattcc  | cgtagtcctc | agtgataact  |
| 2041 | taagtgaagc  | ccaaaccaa   | gcttttcgtt  | tacttgccaa  | tcaatcagct | aactgggcaa  |
| 2101 | agtgggacga  | tgatcttttg  | aagttgaaa   | ttcaagagtt  | agaagacttg | gagtttgacc  |
| 2161 | ttaaaatgac  | tggatttgag  | ctggaaaaag  | tccaacgctt  | tctcgacaac | attgatggaa  |
| 2221 | aagaagaagt  | agaaagagga  | gaaaaagagg  | gggtggaatt  | ggtcgataaa | aagtcagtag  |
| 2281 | gttcgaaacc  | aggggatctg  | tggattttag  | gtggtcacgc  | aatctactgt | ggtgatagtt  |
| 2341 | gtctggttga  | atcattttaa  | gcggtactgg  | acgataaaat  | ggcagatatt | accgtgtgtg  |
| 2401 | accctccgta  | taacttagca  | tatgggtgaca | gtcaggaaaag | agaagacaaa | aaaatactaa  |
| 2461 | acgatgatca  | aggtgaaaaa  | tacgaacttt  | ttctgtatga  | catttgttct | cacgttttag  |
| 2521 | cgtaacacaa  | aggtgcaatt  | tacatctgtg  | catcatcatc  | cgagctggca | acgctgcaaa  |
| 2581 | aggtattttga | agaagcaggt  | ggtcgtttgt  | cgacattcat  | catttgggca | aagaatcatt  |
| 2641 | ttacgctagg  | aagatctgat  | tatcaaagac  | aatacgaaac  | aatactctac | ggttggaaaa  |
| 2701 | atggcaataa  | acgtgagtg   | catgggggac  | gtaatcaaa   | tgatctctgg | ttttacgata  |
| 2761 | agccaacgta  | caactcactg  | cacccaacga  | tgaaaccagt  | ggagttaatg | gagagagcga  |
| 2821 | tagtaaacag  | cagtggacca  | ggggatatag  | ttcttgatcc  | athtagtggt | tctggaagta  |
| 2881 | cattgattgc  | atgtgagagg  | acaggaagaa  | tctgtagaac  | gatagagcta | gatacctacgt |
| 2941 | ttgtagatgt  | gaccataaaa  | cgttggcaag  | tatacacggg  | aagagaagcg | atactttcca  |
| 3001 | atactggcaa  | aacctttgca  | caaattcaag  | aagaaaaacg  | gtaaaagaaa | ggagaaaaaa  |
| 3061 | gtggaaggag  | gaaaaatcac  | gcagacggaa  | tgggcaagg   | aactgggagt | ttcaaagcaa  |
| 3121 | tacgtctggt  | athtagtaaa  | gaaaggaata  | gttgagctgg  | aggatggatt | aattgaccga  |
| 3181 | gaacaagcaa  | atagagcaat  | agaagcaatt  | agagatccaa  | gtcaaccact | gaggagaaaa  |
| 3241 | ggtggagaag  | aaggggaaaa  | aagaggaaat  | aatgatcttt  | caacgatggt | gcttaaaacc  |
| 3301 | cggataaaaa  | acgagatgga  | gcggggaaaa  | ctgctcgagg  | caaaggcaaa | agctgaaatt  |
| 3361 | ggtgaactta  | tctcagtaga  | agaagtaaa   | actgaagcat  | ttaatgtttg | aagagttgtc  |
| 3421 | cgtaataaatt | tgtttaacat  | tccagatagg  | gtttcagcat  | tactagcatc | gataaataac  |
| 3481 | acagagaaga  | tccatgagac  | actgactgag  | gaaatcagaa  | cagctttaga | agagctaacg  |
| 3541 | cagagtgtat  | tttaatgatg  | acatacaatt  | tgaggctact  | aaagaagctc | ttaatgagtt  |
| 3601 | tagtaagcct  | tacccatata  | ttaattgtga  | tacttatttt  | aagtaaggca | tcagcagata  |
| 3661 | cttattgcag  | acaaaaaata  | cctctttttc  | tccttaaaa   | tgcaacaatt | gcagcattat  |
| 3721 | gatatacagc  | agtagttttt  | atgcagggct  | aaggccagat  | ccaccactaa | aagtatcaga  |
| 3781 | gtgggcagat  | aagaaccgtc  | agcttttcgac | gatagcatca  | tcagagccag | gaaaaatggag |
| 3841 | aacagagaga  | accccatatc  | ttaaagaaat  | catggattca  | ctatcttcat | cttcaccggc  |
| 3901 | tgaaaaagtg  | gtattcatga  | aaggagcgca  | gataggcgga  | acagaagctg | ggaataactg  |
| 3961 | gataggatat  | ataatcgacc  | aaacaccagg  | ccctatgctg  | gtagtacagc | caacagtaga  |
| 4021 | aatgggcaag  | cgttggtcaa  | agggaagatt  | tgcgccgctc  | attgaagata | caccatgttt  |
| 4081 | aaggagtaaa  | ataaaagatc  | caaggtcgag  | agattcaggc  | aacactgtac | aaagtaagga  |
| 4141 | atttccggga  | ggaacggtag  | tagtaacagg  | tgccaacagt  | ccagtgggtt | tgcgttcaat  |
| 4201 | gccggtgaaga | tatctttttt  | tagatgaagt  | agatgcgtat  | ccaggggatt | caggaggaga  |
| 4261 | aggagatcca  | gttttactca  | gcatagcccg  | aactaatact  | tttacggggc | gaaaaatcct  |
| 4321 | tttagttttca | acaccaacgg  | ttcacggaat  | aagcagaata  | gagaaggaat | ttgagaattc  |

|      |             |             |             |             |             |             |
|------|-------------|-------------|-------------|-------------|-------------|-------------|
| 4381 | agacaaacga  | tactttttttg | taccttgtcc  | acattgtgat  | cactatcagg  | tgctgaaatg  |
| 4441 | gccacagata  | aagtggaaaag | ataaagatcc  | ctcaacagcc  | cactacgttt  | gcatagagtg  |
| 4501 | tagggggagaa | ataaaaaaatc | atcaaaaaaac | agagatgcta  | gctagagggtg | aatggaggcc  |
| 4561 | tactaatcca  | ataaaaaggtg | aaaaaaaagg  | attccacctt  | tcaagcttgt  | atagcccagt  |
| 4621 | tggctggtat  | agttggaaac  | aagcagtaga  | agattttctg  | catgcaaagg  | aaaatgaaca  |
| 4681 | attactaaaa  | gtttggataa  | atacaacact  | cggagaaacc  | tgggtagata  | aaggagaagt  |
| 4741 | accagactgg  | aagcaactat  | ttgagcgctg  | agaaaatttt  | ccgataggta  | cggtgccaaa  |
| 4801 | aggtggaaaa  | atagtgttaa  | cggcaggggt  | tgatgtacaa  | aaagaccgct  | tagaagcaga  |
| 4861 | agtagtagca  | tggggtatgg  | gtcgtgagag  | ttgggtcaata | gactatcagg  | tattagaagg  |
| 4921 | tgatactgga  | agtggagaag  | tatgggaaaa  | acttttcagag | cttttgaatc  | atcattttat  |
| 4981 | cggtgaaaat  | gggcttgaat  | atatgataag  | tatgatggcg  | gttgatgctg  | ggtatgcaac  |
| 5041 | acaagaggta  | tacaactggg  | taagagggtca | ccaaggggtca | gggagagtaa  | tggcagtaaa  |
| 5101 | agggggcaaac | aaagcgctag  | tgccacttag  | cagcccaagt  | agagtagatg  | taacagttag  |
| 5161 | cggacaaaag  | ctaaagagag  | gaatgaagct  | gtggccagtt  | ggggtatcga  | tattgaagtc  |
| 5221 | cgagcttttt  | cagctactta  | atgtttttaa  | aaacggggcca | gggtattgtc  | attttccaga  |
| 5281 | gtatccacct  | gaatatttta  | agcaacttac  | tgcagaacaa  | ctaattacca  | aggtagtaaa  |
| 5341 | agggtatacc  | aaacaagagt  | ggcaaaagat  | aagagatcga  | aatgaagtac  | tagattgcag  |
| 5401 | agtttacgca  | agagcagcat  | cgatagcact  | gggaatagat  | agatggccag  | agagtaagtg  |
| 5461 | ggaaagttta  | gtaggtgaaa  | aaactaaaaa  | gtcaaaaaga  | gtgagaagaa  | gtcaatgggt  |
| 5521 | gagtggagaa  | agttgatgta  | caaccaagaa  | tatttaactc  | aagtagaaga  | agcgataaag  |
| 5581 | aagctacaga  | gcggggaaag  | agtagtatcg  | attgcatatg  | gtgaccatgt  | agttcggtat  |
| 5641 | ggagaagttc  | agataaaaga  | tctattggac  | ttaagacaac  | gcattaaatc  | tgaattgaaa  |
| 5701 | gtcgcagggtg | tgaagccgaa  | gagaaagatt  | gttattgcaa  | ctagtaaagg  | agttatatga  |
| 5761 | gaagttatat  | gatggaaaat  | gaatacccag  | acttttttaga | gcattttaaag | tatattatag  |
| 5821 | ccactgggtac | accaggggatg | cttgtaaagt  | caataataga  | catttcccat  | tgggaataaaa |
| 5881 | gtgtagattt  | taagctagtg  | aaagaagatg  | gtatagtggg  | catcatacac  | aaagcaacgc  |
| 5941 | aaggggtgaa  | gtacatagat  | cctgagtatg  | caaaaagaag  | aaaagccgct  | gaagaagagg  |
| 6001 | aattgctttg  | gggagcatac  | cattttgggtg | tcggggaaaa  | aagcggcaaa  | gaccaaactg  |
| 6061 | atcatttttt  | agagacaatt  | ggcgatagtt  | caagtatat   | gctagccctc  | gacattgaag  |
| 6121 | aaaataaaga  | tggaaaaagt  | ataacagcaa  | aacaagcggg  | agactttgtt  | aatcgagttt  |
| 6181 | atgtagtaac  | gggacgttta  | ccattaat    | atggcagtc   | ttattttctg  | aaagattttg  |
| 6241 | caacgccgat  | tttaactgaa  | tgcccactat  | ggttatcaaa  | atggggagca  | gagccaacat  |
| 6301 | taccaatagg  | atggaaaaaa  | tggactttat  | ggcagtatac  | cgatggtaaa  | acaggctccta |
| 6361 | aaccaaattc  | agtagaagga  | ataggctcat  | gtgatagaaa  | taaattcaac  | ggaacattag  |
| 6421 | agaattataa  | agattttttg  | atatcatgat  | gttattgaaa  | tcattcaaac  | aattattcca  |
| 6481 | caagcgacca  | aaaccaaag   | gttcagtatg  | ggatggagct  | ggatctggca  | gaagattatt  |
| 6541 | gcactttcaa  | ccagagacag  | gaagtataaa  | tagcttactc  | tcgcatagtc  | ttgaaacttt  |
| 6601 | agaagtcga   | tcacgtgaca  | tggtaaagaa  | gaactcctat  | gcagcaaaca  | tcatcgatac  |
| 6661 | gatagtgagt  | aattgcgttg  | ggacaggaat  | aaaaccgcag  | tcaaaggcga  | aagatgcaga  |
| 6721 | atctcgga    | aaagtgcag   | aattatggct  | gagatggaca  | gatgaagcag  | acagtagcgg  |
| 6781 | agtaagtgat  | ttttatggac  | tgcaggcatt  | ggtctgtaga  | agcatgattg  | aaggaggaga  |
| 6841 | atgttttgta  | cggctgagaa  | cgagaaaacg  | agaagatgg   | ctttgtgtgc  | cgttacaact  |
| 6901 | gcaagtactt  | gaatcagagc  | atttagacaa  | taagagcaat  | caaacccttg  | ccaacggtaa  |
| 6961 | tgtaataaga  | aacgggattg  | aatttaaccg  | acttgggcaa  | agagaagcgt  | attacctatt  |
| 7021 | tagagaacat  | ccgggtgaag  | gatcattttg  | agagtcagtt  | agagtaccag  | caaatgatgt  |
| 7081 | ttacatatt   | tacagaccac  | taagacctgg  | gcagattcga  | ggagtaccgt  | ggctttctac  |
| 7141 | agtactttta  | aagctctatg  | aacttgatca  | atatgacgat  | gcagaattag  | tacgaaaaaa  |
| 7201 | gactgctgca  | atgtttgctg  | ggtttattac  | cagactcgat  | cctgaggcga  | acatcatggg  |
| 7261 | agaaggggaa  | agcaatgagc  | aaggggtagc  | attatctggt  | ttagaacctg  | gaactatgca  |
| 7321 | acttttagat  | ccaggggaag  | atatcaaatt  | ttcagagcca  | tcagatgttg  | gaggaagtta  |
| 7381 | cgaagcattc  | atgaaacagc  | agctcagggc  | aatagcagta  | ggcatgggaa  | taacgtatga  |
| 7441 | gcagctaaca  | ggagatctta  | ccggggtcaa  | ttattcatcg  | atacagagcag | ggttaataga  |
| 7501 | gtttcgccgg  | aggtgtgcaa  | tgttacagca  | taacgtggta  | gtatttcagt  | tttgccggcc  |
| 7561 | agtatggtgt  | agatggttag  | aattagcaat  | actatctgga  | gaattagaca  | taagtgaaaa  |
| 7621 | aggggcaaaa  | aaggtaaaat  | ggatagcgca  | agggtttgat  | tgggtagatc  | cactgaaaga  |
| 7681 | ccagcaagca  | cagcaaatgg  | cggtaaggaa  | tgggttttaa  | agcaggtcag  | aagtagtalc  |
| 7741 | agagctaggt  | tacgatatag  | aagaaatcga  | ccaagaaatt  | gctgaagatc  | aaaggcgtgc  |
| 7801 | tagtgaattg  | ggttttaagtt | ttgactcgga  | cgtcagtagt  | tttgattcta  | atactgaaat  |
| 7861 | aatatgacaa  | cacaagtgag  | ccggctcaat  | aaaccgatga  | tgatagagca  | aagaagcttt  |
| 7921 | gatttattgt  | cattacatgc  | agagaagcat  | ccaacgttta  | aaaatataaa  | acatgcagta  |

|       |             |             |             |             |            |            |
|-------|-------------|-------------|-------------|-------------|------------|------------|
| 7981  | agaaatagt   | aaaggggaat  | aaaagtaata  | ccaatacatg  | gaatcttgac | gaagaagtca |
| 8041  | gaggctttt   | atgatgtgt   | ggggatgaca  | tcgtatgaga  | agatacgtga | agagatagaa |
| 8101  | gaagctttta  | tagatgaaga  | agtagaaaca  | ataattttgg  | acatagacag | ccccggagga |
| 8161  | gaagtaaaca  | gtttattcga  | tctttcggac  | tttatTTtacg | aagcaagggg | attaaaaaag |
| 8221  | atcgtagcaa  | tagcaaata   | tgatgcgtat  | tctgcagcgt  | atgcaattgc | atcaagtgc  |
| 8281  | gaaaaagt    | tggtaacgag  | aacttcagga  | gttggaagca  | taggagta   | agcaagtc   |
| 8341  | atagatcaaa  | gtggatttga  | tgaaaagcaa  | gggataaaat  | ataccacagt | atTTgcagga |
| 8401  | aagagaaaa   | acgattttaa  | tccacacgag  | ccaataacgt  | ctgaaagtct | ggaaagctta |
| 8461  | caagaggaag  | tagatcgcct  | atatgagatg  | ttgtcgcgag  | ttgtagcaag | gaataggaat |
| 8521  | ctttccacgg  | aaacaatcaa  | atcaacggaa  | gcagggtctat | atTTTgtgga | gaaagcaata |
| 8581  | gagattggac  | ttgctgatga  | agtgataaca  | tattctgaat  | ttatagatag | gagaaacaat |
| 8641  | atgagtaaag  | ctgaattttaa | ctataagggc  | cacaccatcg  | atgctgatga | gttaatggaa |
| 8701  | gaatcaaaac  | gaataggtta  | tgagaggtgc  | cgcaaggaag  | tattagaggt | aataagatta |
| 8761  | tgtaatTTat  | caaagatgcc  | agagaaaata  | ggagaattta  | tcgagcagaa | tgtaaatgca |
| 8821  | aaacaagcgc  | aagaaatatt  | aatgtcgata  | ctggcggaga  | gaacgaagaa | gacagagata |
| 8881  | ctgagtacaa  | taccgcaaaa  | tacaccagaa  | gacttgatga  | tgcaggtagc | aagaactcga |
| 8941  | gcgcaatctg  | gcatttgaga  | aatttaggta  | tcagcaatta  | caaacgccgc | ggtaaataag |
| 9001  | tgaccaaagt  | ccgccagaat  | aggcaattac  | aggatggcat  | atctTTTacc | gcggcgtata |
| 9061  | acagctacaa  | acacagcgg   | aaacaagtag  | ccaaaaatta  | taagcaatct | atctTTTacc |
| 9121  | gccgcgtatc  | aaacatggcg  | gtaaaactaa  | agggaaaaaa  | aggagaaaaa | tttatgagtt |
| 9181  | gtataaccga  | acaaaataac  | cttggtgacc  | tattaaagta  | tgaggcatca | aatctatatt |
| 9241  | caagagacca  | aataacagta  | gcaaaggggc  | aaaaccttaa  | acttggtacg | gttggtggtc |
| 9301  | gtgataaaga  | tgatctaatt  | aaaattataa  | acttagcggc  | tacagatggc | acgcaaacag |
| 9361  | caataggtgt  | aataacaagt  | gatgtaaacy  | caacggaaac  | caccaaagca | gtaatcatta |
| 9421  | cacgtatagc  | aatgctagca  | gatcatgcag  | tggtgtggcc  | aggaaatata | actgaggagc |
| 9481  | aaaaagctgc  | agcaataaag  | caacttgaag  | cacggggcat  | catcattcgt | aagggagttt |
| 9541  | aaaactgctc  | aactgaagag  | caaaaccaat  | ttaaactact  | aaaggggaaa | aacatgcaaa |
| 9601  | atccattttac | aatccagca   | tttagtatga  | cggaattaac  | taaagcaata | aacatattgc |
| 9661  | cgataaatta  | tggtcgaaca  | gaaagcttaa  | atTTatttcc  | aagtagatcg | gtaagatttc |
| 9721  | gacatatcac  | gatagaagag  | caaaacggag  | tattgagttt  | attaccaacg | caagttccgg |
| 9781  | gagcaccagc  | aacagtggga  | aaacgcggaa  | aacgaaaaat  | aagaacattt | acgataccac |
| 9841  | atattcccca  | tgatgacgta  | gtgttacctg  | aggaagtgca  | aggaataagg | gcatttgggt |
| 9901  | cagagaatga  | actgaaagcg  | ttggctaacy  | tggtaacaga  | tcatctggag | ttgatgagaa |
| 9961  | acaaacacgc  | gataacgtta  | gaacatttgc  | gaatgggggc  | gttgaaggga | atcattcttg |
| 10021 | atgcagatgg  | gtcagagtta  | ttaaatcttt  | acaacgaatt  | tgaaattacg | ccaaaagtag |
| 10081 | taaattttgc  | actgggaact  | gcgacaaccg  | atgttaaagcg | taagtgtctg | gaagtattgc |
| 10141 | gccatgttga  | ggacaacctta | agtgggtgaat | acatgaccgg  | gattcatgca | ctggtaagtc |
| 10201 | ctgagttttt  | tgatgcacta  | acttctcatg  | ccaaagtaaa  | agaagcatac | gagagatggc |
| 10261 | aagaaggagc  | agcgctaag   | aacgacatga  | gatcaggatt  | tacgttctgt | ggaataacat |
| 10321 | ttgaggagta  | cagaggacaa  | gcaactgacc  | ctgaaggaaa  | tgtgagaagg | tttatagaaa |
| 10381 | aagacacagg  | acactgtttt  | ccacttggtta | cagcaagcac  | atttactact | tactttgcgc |
| 10441 | cagcggactt  | taatgaaacy  | gtgaataccc  | ttggtcagcc  | attgtatgca | aaacaagagc |
| 10501 | caagaagatt  | tgatagaggg  | actgaccttc  | atacccaatc  | aaacccttta | ccgatgtgcc |
| 10561 | accgtccgag  | gatattaaca  | aaaatcgttg  | cagcatagag  | gagccaaaaa | ggaaagaatg |
| 10621 | actttcctcc  | taccaatata  | gccactttgt  | gtgcctttca  | agtttattgc | ataaagaggt |
| 10681 | aaaatggttt  | ttgtgggcag  | agcaactaca  | agaaaagagg  | tatgaaaaag | ctgctctgct |
| 10741 | cgaagtaaaa  | gttaatacat  | aaaaagaaga  | catgcaagga  | aatattaaga | gattattgaa |
| 10801 | agattgtttt  | acacatttag  | ggcagcaagc  | gttgatatgaa | tcaaaggata | agtcatacat |
| 10861 | ggttcagggtg | ctgaaacaac  | aaccagataa  | attatatgga  | attggtgaag | gacaatttgt |
| 10921 | cggggagatg  | gtttttcttg  | aggtagatat  | attcgatgta  | ttgcagccag | tagtaggaga |
| 10981 | tacctttatt  | attgataagc  | gtaagtacaa  | agtataattca | ccaccactta | gggataattc |
| 11041 | aggaatgttg  | tggaaagattc | aggcgtcagg  | atgcgtataa  | acatagaaat | caccgaaagc |
| 11101 | attatacaaa  | gcgtaaatgc  | caaaaaatct  | atagtggaat  | tggcaacgat | gagggcacta |
| 11161 | aacaaaacag  | cgctatggat  | aaaatcacia  | gcagctagag  | aaattagcga | agaaaagaaa |
| 11221 | ataaaacttaa | acgtgataag  | aaagagattg  | agaattttta  | aggctaagac | aagtaggtta |
| 11281 | gacgtatttaa | tgagagcaaa  | tttatatgat  | attagagcat  | cagcagttgg | caagatgaaa |
| 11341 | caaacaagaa  | aaggagcgaa  | agtaggaaaa  | catgagttta  | taggagcatt | tatggcaata |
| 11401 | atgccaaagag | gaaatagtg   | tgttttttagg | cgtgaaggaa  | gaacagcttt | gccaatacaa |
| 11461 | gaggtaaaa   | tagcatttga  | gccagaagca  | tcaaaaaata  | taaaggagct | agttaattat |
| 11521 | gaaacagaag  | ggatatttga  | gaaatatttt  | gagcgtcgaa  | gggcgcaaac | acattacatg |

```

11581 gacttatcag aaaaaatcctt gttttag
//
LOCUS      JAQZAU010000150      14568 bp    dna        linear    ENV 17-MAR-2023
DEFINITION MAG: Wolbachia pipientis isolate wEsol contig_24028, whole genome
            shotgun sequence.
ACCESSION  JAQZAU010000150  JAQZAU010000000
VERSION    JAQZAU010000150.1
DBLINK     BioProject: PRJNA929258
            BioSample: SAMN33142973
KEYWORDS   WGS; ENV; Metagenome Assembled Genome; MAG.
SOURCE     Wolbachia pipientis (insect metagenome)
ORGANISM   Wolbachia pipientis
            Bacteria; Pseudomonadota; Alphaproteobacteria; Rickettsiales;
            Anaplasmataceae; Wolbachieae; Wolbachia.
REFERENCE  1  (bases 1 to 14568)
AUTHORS    Fiutek,N., Couger,B.M., Roy,S., de la Torre,J.R. and Connor,E.F.
TITLE      Genomic assessment of the contribution of the Wolbachia
            endosymbiont of Eurosta solidaginis to gall-induction
JOURNAL    International Journal Molecular Sciences
REFERENCE  2  (bases 1 to 14568)
AUTHORS    Fiutek,N., Couger,B.M., Roy,S., de la Torre,J.R. and Connor,E.F.
TITLE      Direct Submission
JOURNAL    Submitted (10-FEB-2023) Biology, San Francisco State University,
            1600 Holloway Ave, San Francisco, CA 94132, USA
COMMENT    ##Genome-Assembly-Data-START##
            Assembly Date      :: JUN-2019
            Assembly Method    :: FLYE v. 06-2019
            Genome Representation :: Full
            Expected Final Version :: Yes
            Genome Coverage    :: 100.0x
            Sequencing Technology :: Illumina HiSeq; PacBio Sequel
            ##Genome-Assembly-Data-END##
FEATURES   Location/Qualifiers
            source              1..14568
                                /organism="Wolbachia pipientis"
                                /mol_type="genomic DNA"
                                /submitter_seqid="contig_24028"
                                /isolate="wEsol"
                                /isolation_source="galls on Solidago altissima"
                                /host="Eurosta solidaginis MN-2018-EFC"
                                /db_xref="taxon:955"
                                /environmental_sample
                                /country="USA: Cowling Arboretum, Carleton College,
                                Northfield, MN"
                                /lat_lon="44.48 N 93.13 W"
                                /altitude="280 m"
                                /collection_date="2018-11"
                                /metagenome_source="insect metagenome"
                                /note="metagenomic"
            gene                complement(<1..133)
                                /locus_tag="wEsol_01676"
            CDS                 complement(<1..133)
                                /locus_tag="wEsol_01676"
                                /codon_start=1
                                /transl_table=11
                                /product="hypothetical protein"
                                /translation="MDREDIPEVLFFSSIKEDDPYRASKLLQIERWCCTHSKIIEKEVF
                                "
                                /besthit="qcoverage 93.1818181818182 , hcoverage
                                9.60187353629976 , similarity 100 , identity 97.6 ,

```

```

        evaluate 2.53e-18 , alnlength 41 , Bacteria ,
        Proteobacteria , WP_209473047.1 hypothetical protein
        [Wolbachia endosymbiont of Wiebesia pumilae]"
gene      921..2069
          /locus_tag="wEsol_01677"
CDS       921..2069
          /locus_tag="wEsol_01677"
          /codon_start=1
          /transl_table=11
          /product="hypothetical protein"
          /pfam="Pfam-B_557 Pfam-B_1600 Spc7 Tropomyosin
          Pfam-B_6923 Pfam-B_1600"
          /translation="MFSSKQAVQYNLFGSNGLEGISSCEFAHFPEEVFEISSEENQVI
          DSLESKIENLQQGNFDLKKNVELQKHKKRVVEEYEEASKLTREMQTLEGKIKKLEVK
          LQKRTRSLTENDQDIEQLKQKVEILLLETQNKSDVIKLNQNLKEAKNEIQLTDKINE
          ELQQKLDLTEAELNVRKESTVLINSIEDLKGNENQILEKKKELNDIRDQLCIYSSE
          YKELFAEFSRLQKENENLKQKNFYISNEVSLADEINKENVRKETARPQSIHEVETRCI
          KDNDDEPTWLRREGENNQHDKTSEDKNLENIDFEIGVWNEADNESSDDHKSTQLYGK
          TENCLTSEDKNLKNLDFPIEVWNGTDSEDEDNVSPCPDYDESFGRRYS"
          /besthit="qcoverage 100.523560209424 , hcoverage
          51.5436241610738 , similarity 84.6 , identity 82.3 ,
          evaluate 5.65e-163 , alnlength 384 , Bacteria ,
          Proteobacteria , WP_182320350.1 hypothetical protein
          [Wolbachia pipientis]"
gene      2091..3116
          /locus_tag="wEsol_01678"
CDS       2091..3116
          /locus_tag="wEsol_01678"
          /codon_start=1
          /transl_table=11
          /product="hypothetical protein"
          /pfam="Pfam-B_5362 Pfam-B_5362"
          /translation="MRKEDSFSLAKIKLNAIEIKKYESIWQKIDKIHDDLNLNLRGN
          DEDYEKCEKEFDKVISEALEQGIMFSFPYKSDISLVDRIADTLQKLYLSYDTTQIYEF
          LDKKKVLQIISEGAFLNRFSDEEHEDIVNVICSDKDTLDQRKANLSKLKELALESIMN
          KSEQIDEYDFELEIDNGYFCIGYPQNSTIEVARVFENEEAKGLNLNIGVLQVGKSIIR
          VENIGGKRNYTEFSGDIIEMSFTAIEIGEISIHLCPSSEKDSNKIEVRLVDEVRFNKLEN
          KSNLGQSCLLGKSVLTAIENGYFERNSSVFKESECIMENPSSFLEGVNKNQLLRANA
          RAYGRGL"
          /besthit="qcoverage 102.052785923754 , hcoverage
          65.2908067542214 , similarity 92.0 , identity 87.1 ,
          evaluate 2.17e-209 , alnlength 348 , Bacteria ,
          Proteobacteria , WP_108784668.1 hypothetical protein,
          partial [Wolbachia endosymbiont of Bemisia tabaci]"
gene      3159..6974
          /locus_tag="wEsol_01679"
CDS       3159..6974
          /locus_tag="wEsol_01679"
          /codon_start=1
          /transl_table=11
          /pfam="Pfam-B_7209 Pfam-B_677 Pfam-B_19232 Collagen
          Pfam-B_798 Collagen Pfam-B_677 Pfam-B_677 Pfam-B_11677
          Collagen Pfam-B_798 Collagen Pfam-B_677 Pfam-B_798
          Collagen Pfam-B_17012 Collagen"
          /fullproduct="qcoverage 96.3021243115657 , hcoverage
          104.794520547945 , similarity 86.3 , identity 83.1 ,
          evaluate 0.0 , alnlength 1224 , Bacteria , Proteobacteria ,
          WP_143688937.1 collagen-like protein [Wolbachia
          endosymbiont of Laodelphax striatellus]"
          /translation="MRFNLEPGDTFCDGKSKLVNVKINDDERIHLPTYTSYIFDKYQHF

```

```

IISNFKLDPMNSILTNFYQQELYLKLEKVGGDYKLALVNGSDQYYYYYYYDPNISKIA
TFNSIPSNFIEYRGQEYIRSYAGECSVDLVPLINSRVLVDPKDIMSNKDIDFVLKELE
KLPDKRLRIGVGKNFLRGPEKVLSENTYKSAEVYDIYDNKIGILNNIATSFSNKKLELF
SGNVSIDTIDQFGANLSLKKTNP SFRIKRLNNDNYVGCMLSKYGKCFERYALTPESEFE
QEEYTYTDYEEEEFFDQQSDYLYPYYYLHGLEVMTMNNKKLQORIENTLEKIVRNLND SI
ALVPGLKGEPGERGMRGLPGARGESGPVGP PGSGYQKGEPGELVWDRRPGEKGFPG LK
GERGIMGYPGERGEPLIGPPGIPGLDGIPGEPGTPGQKGDGDT PNAQEIVTKLVTS
KKAELVEAVLNTKDIKGENLATQIAGKINLNSQELVNKIDVAKLTEGVVSKLSLEEAK
NIIKDTVSKITS DATKKNNPDPIAFQKYEKFAEKLAELLVRRSSMSEKEAQTLVKDKV
SDWGLAKYLLIYSDLNEQIKALEMLKKEINEEKLIQSLLDYAQLRGNASATKTIIENI
VHQFLDTKKVGELGRAVLEAKDNQGKRILVNDPALQKGVAEELRKNPGQTKGDTGIPG
TPGLKGDKGLQGESGMKGPRGWKGEPGSKGLKGERGDIGPKGDTGIPGTPGLKGDKGL
QGESGKGPGRGWKGEPGSKGLKGDQRNIGFKGDTGSKGDKSRDTSPEEVAQKLINNGT
IANQVLEYRDQDGLVLEKQVAGRIISNQDIQTGIAIALADNRMEELADVLLRGANHT
LVEKLANNTELIQSISEELRKNPGEVQGPKGKGDIGPKGLDGAMGIKGRGEKGEIG
FKGDKGEPGANGLQGPEGPKGSDGLPGPKGEIGLQGPKGQVGRSGLKSGKGDGTGLTGI
PGPKGEDGIGAALADKFLYEIKKVKNETLNKDAVEVAKNASESFAKEAKNANDNIIIE
LHNKTENFTKKAIEVFCNASKKSASDASVSESNTQTFYSQTQKMFQVQIPNDKSCVTKK
RRKREIINSPVTSGASRPTSFISQVINFFYPAVGQDEYKVKNEIQEVAKIINAADIVT
KFEEVLGATAVKCGISKSLNFDPVELQSTIINKSLLNDENHNELLKFLCVTAKKSLP
NYKQTSKCLFTFKDHMEKRLKDNEQERALVNTEKIVADNEQPRSFMTYVAPPSSLSAI
NQQVVGYLR"
/product="collagen-like protein"
/besthit="qcoverage 96.3021243115657 , hcoverage
104.794520547945 , similarity 86.3 , identity 83.1 ,
evalue 0.0 , alnlength 1224 , Bacteria , Proteobacteria ,
WP_143688937.1 collagen-like protein [Wolbachia
endosymbiont of Laodelphax striatellus]"
gene 6979..8229
/locus_tag="wEsol_01680"
CDS 6979..8229
/locus_tag="wEsol_01680"
/codon_start=1
/transl_table=11
/fullproduct="qcoverage 99.0384615384615 , hcoverage
99.5169082125604 , similarity 98.5 , identity 97.6 ,
evalue 2.25e-297 , alnlength 412 , Bacteria ,
Proteobacteria , WP_108784364.1 hypothetical protein
[Wolbachia endosymbiont of Bemisia tabaci]"
/translation="MKKYTFEIEDKNPLYKKLIELPTTYRKLKHNNNKYTIHSHIGTA
ELGDDTNGLKLKKQGDKIFLYKGASPLKVHNTNGEVKDLVIEQGDIISEKKSDILETI
KTQEINIVLKEGSGISDFALGLSYLNDDLSTLTGMLS FIDFYNEDDPALQKIKGEEGR
LYFTIEEDNIFVSDKNGNCLPVCKDGSCYKYQYTKNKH DIEISEISKIIESLTKTKEC
SISETTESSIKAGQSLTLQQUEEKLSEDDMYEAENGKCISTLPKIVYHMFNNEFLIHNH
TTKEKGVEIPRDFHYLKVQSSSNDYQLTFCNFLGNEFFEHKKYDPQYSNVSDEYKY
ISLNCMRKEYKPNFCKLLNHKPSFFITEGTANPCPCHYSADIYELTSSGKGRKMTTL
TDQFYSFNEDCDCYTNIENLGFFN"
/product="hypothetical protein"
/besthit="qcoverage 99.0384615384615 , hcoverage
99.5169082125604 , similarity 98.5 , identity 97.6 ,
evalue 2.25e-297 , alnlength 412 , Bacteria ,
Proteobacteria , WP_108784364.1 hypothetical protein
[Wolbachia endosymbiont of Bemisia tabaci]"
gene complement(8528..10036)
/locus_tag="wEsol_01681"
CDS complement(8528..10036)
/locus_tag="wEsol_01681"
/codon_start=1
/transl_table=11
/pfam="Resolvase Recombinase Zn_ribbon_recom Pfam-B_1335

```

Pfam-B\_11632 Pfam-B\_16452"  
 /fullproduct="qcoverage 100 , hcoverage 100.199600798403  
 , similarity 96.2 , identity 92.2 , evaluate 0.0 ,  
 alnlength 502 , Bacteria , Proteobacteria , KLT22520.1  
 site-specific recombinase, resolvase family [Wolbachia  
 endosymbiont of Armadillidium vulgare str. wVulC]"  
 /translation="MKIEENKMLKEVRCAIYTRKSNEDGLEQKFNSLDAQRVACEKYI  
 KSKEGWVALAKRYDDGGYSGKNLERPAIKELFEDVKGGEIDCVVVYTLDRLSRETKDS  
 IEVTSFFRRHRVNFIAVTQIFDNNTPMGKFVQTVLSGAAQLEREMIVERVKNKIATSK  
 EQGLWMGGTVPLGYDVKDKELIINEKEAKTVKHIFERYVELKSIAELARELNREGYRT  
 KSDIFKKATVRRRIITNPIYMGKIRHYEKEYEGKHEAIIIEEEKWQKAQELIKNQPYRKA  
 KYEEALLRGIICKSCNVNMTLTYSKKENKRYRYIICNNHLRGKNCESINRTIVAGEV  
 EKEVMKGVEQLYENWKEKTEEKWKNLSFGKQKEVVKKLIKGVMIKEDGIEVSSESEEK  
 LIPMKKKGNKCMVVEPEAKTNNALLKAVVRAHSWKRQLEEGKYRSVKELSMKINIGTR  
 RIQQILRLNYLAPRIKEDIVNGRQPRGLKLADLREIPMLWSEQLEKFCGLNL"  
 /product="site-specific recombinase, resolvase  
 family"  
 /besthit="qcoverage 100 , hcoverage 100.199600798403 ,  
 similarity 96.2 , identity 92.2 , evaluate 0.0 , alnlength  
 502 , Bacteria , Proteobacteria , KLT22520.1  
 site-specific recombinase, resolvase family [Wolbachia  
 endosymbiont of Armadillidium vulgare str. wVulC]"  
 gene complement(10026..10457)  
 /locus\_tag="wEsol\_01682"  
 CDS complement(10026..10457)  
 /locus\_tag="wEsol\_01682"  
 /codon\_start=1  
 /transl\_table=11  
 /pfam="DUF2924"  
 /fullproduct="qcoverage 99.3006993006993 , hcoverage  
 99.3006993006993 , similarity 97.9 , identity 95.8 ,  
 evaluate 5.01e-88 , alnlength 142 , Bacteria ,  
 Proteobacteria , WP\_065106815.1 DUF2924 domain-containing  
 protein [Wolbachia endosymbiont of Nomada ferruginata]"  
 /translation="MERETEEKVMNLERKPLDELKRIWKKVFGEAAPRYSKKYLIPLR  
 AYRMQEKAYGEMSRKGAKRLDYLADRLEKGRISSDKLPVEGTELILERGEETHAVMV  
 TDKGLIYREEFFTSLSAVAGKIMGMSYNGPLLFGMRDKNEN"  
 /product="DUF2924 domain-containing  
 protein"  
 /besthit="qcoverage 99.3006993006993 , hcoverage  
 99.3006993006993 , similarity 97.9 , identity 95.8 ,  
 evaluate 5.01e-88 , alnlength 142 , Bacteria ,  
 Proteobacteria , WP\_065106815.1 DUF2924 domain-containing  
 protein [Wolbachia endosymbiont of Nomada ferruginata]"  
 gene complement(10462..10944)  
 /locus\_tag="wEsol\_01683"  
 CDS complement(10462..10944)  
 /locus\_tag="wEsol\_01683"  
 /codon\_start=1  
 /transl\_table=11  
 /pfam="Ank\_2 Pfam-B\_10896 Ank\_3 Ank\_4 Ank Ank\_5 Ank Ank\_3  
 Ank\_4 Ank\_5 Ank\_2 Ank\_3 Ank"  
 /fullproduct="qcoverage 96.25 , hcoverage 100 ,  
 similarity 94.2 , identity 88.3 , evaluate 2.76e-69 ,  
 alnlength 154 , Bacteria , Proteobacteria ,  
 WP\_208571537.1 ankyrin repeat domain-containing protein  
 [Wolbachia pipientis]"  
 /translation="MLKLGKFNKSAKELLENSYKDIYARDRTLHYAVDAKTVKLLVE  
 KGVNVNAADARGYTALHLAVTEKRLEIVRELIKSGAEVNAAEEYGKNCIPLHLACMVGE  
 KEIVEELVKAGGEIEQADKFGMTAMDYAKNSKEVTEVLKKEMGRIEKLFEQIEPSMRG

```

"
/product="ankyrin repeat domain-containing
protein"
/besthit="qcoverage 96.25 , hcoverage 100 , similarity
94.2 , identity 88.3 , evaluate 2.76e-69 , alnlength 154 ,
Bacteria , Proteobacteria , WP_208571537.1 ankyrin repeat
domain-containing protein [Wolbachia pipientis]"
gene complement(10983..11693)
/locus_tag="wEsol_01684"
CDS complement(10983..11693)
/locus_tag="wEsol_01684"
/codon_start=1
/transl_table=11
/pfam="Pfam-B_10896 Ank_4 Ank_2 Ank_5 Ank Ank_3 Ank_4
Ank_5 Ank Ank_3 Ank_4 Ank_5 Ank Ank_3 Ank_2 Ank_4"
/fullproduct="qcoverage 100 , hcoverage 100 , similarity
99.6 , identity 96.2 , evaluate 4.42e-125 , alnlength 236 ,
Bacteria , Proteobacteria , WP_208571771.1 ankyrin repeat
domain-containing protein [Wolbachia pipientis]"
/translation="MSFSKSKFFKEVSSKNINKRNEEGETILHQAVEISDYKTVRLLI
KKGAEVNARDKNGYTPLHCAVFAKSLENVKVLLREGAEVNATQYVTGCTPLHSACKIG
GAGVEIIKELVKAGAEVNQLNKYGATPMYYIWESEKYCSWNREENEKASKFLREKGGV
TKSRELTCYGIEGLVGEIADILNGSYMPELKIIEIGEIRKRDKSLIKEECKNLASKII
SKVNEMIDEAENVVGRKA"
/product="ankyrin repeat domain-containing
protein"
/besthit="qcoverage 100 , hcoverage 100 , similarity 99.6
, identity 96.2 , evaluate 4.42e-125 , alnlength 236 ,
Bacteria , Proteobacteria , WP_208571771.1 ankyrin repeat
domain-containing protein [Wolbachia pipientis]"
gene complement(11862..13016)
/locus_tag="wEsol_01685"
CDS complement(11862..13016)
/locus_tag="wEsol_01685"
/codon_start=1
/transl_table=11
/pfam="Pfam-B_16372 Tail_P2_I"
/fullproduct="qcoverage 100 , hcoverage 100 , similarity
96.1 , identity 90.6 , evaluate 2.26e-263 , alnlength 384 ,
Bacteria , Proteobacteria , WP_127464048.1 phage tail
protein [Wolbachia endosymbiont of Bemisia tabaci]"
/translation="MLLPPNATKQEQALVDATDYKVDPGCIRGFKFSLKEETLPWLIE
EYELGEILRWVKDKRRAIVEGVKFQRLRGTPASLKIALKWANIKDITIIEPPGKHFF
ELQIGIRDVPNNFFVDAVVELAKLSLPVRSRLMRIFNDHYNVERFILDSEFFGSLLSD
YSGIKVQKNGPVLFSGRINFFSSRGLLVEIIENYL RDHYERALSNDIYRLDVAILGET
EPHTKNYNGIYERNHLWYNLKALYPLPQSLLPSIKFAKAQIVLSDSWDLGDINTCFPV
SSVEERGKNFVLGSDKLSGQYWNLKHKPILERFSVTHNYKAKNYTDQKVRKYVLAEHN
VYYKNDLEQKDSIHELENYILVFYPGV LKWHEHRHLHRSWKNSQAICVIS"
/product="phage tail protein"
/besthit="qcoverage 100 , hcoverage 100 , similarity 96.1
, identity 90.6 , evaluate 2.26e-263 , alnlength 384 ,
Bacteria , Proteobacteria , WP_127464048.1 phage tail
protein [Wolbachia endosymbiont of Bemisia tabaci]"
gene complement(13016..13801)
/locus_tag="wEsol_01686"
CDS complement(13016..13801)
/locus_tag="wEsol_01686"
/codon_start=1
/transl_table=11
/fullproduct="qcoverage 100 , hcoverage 100 , similarity

```

97.7 , identity 92.3 , evalue 3.58e-164 , alnlength 261 ,  
 Bacteria , Proteobacteria , OAM03432.1 baseplate assembly  
 protein J [Wolbachia endosymbiont of Dactylopius coccus]"  
 /cog="COG3948 COG3948 306 Phage-related baseplate  
 assembly protein"  
 /pfam="Baseplate\_J"  
 /product="baseplate assembly protein J"  
 /translation="MQTSNIIEKLSYEEIFSRMKEELINRDASFTALVESDPAMKVLE  
 VAAWRELLLRQRINESVKSNLLKFAKGEDLDNLAEFYGVERQKEEEDERFRKRIKAKI  
 KGWSTGGSKEYRYHALSADSRVKDALVESPIPGKVQISILSTTTGMVSEELLEIVKK  
 QVTRDDIRVLTDTITVIGCNITEIDIHSRMSISPVISKEEIKKQFIQKFELAKRLGWS  
 VTRSWIISNLFVDGVENVELIEPKEDVVVLGNECANLRNLKVE"  
 /besthit="qcoverage 100 , hcoverage 100 , similarity 97.7  
 , identity 92.3 , evalue 3.58e-164 , alnlength 261 ,  
 Bacteria , Proteobacteria , OAM03432.1 baseplate assembly  
 protein J [Wolbachia endosymbiont of Dactylopius coccus]"

gene complement(13804..14139)  
 /locus\_tag="wEsol\_01687"

CDS complement(13804..14139)  
 /locus\_tag="wEsol\_01687"  
 /codon\_start=1  
 /transl\_table=11  
 /fullproduct="qcoverage 100 , hcoverage 100 , similarity  
 99.1 , identity 98.2 , evalue 3.67e-68 , alnlength 111 ,  
 Eukaryota , Arthropoda , KAG8290585.1 hypothetical  
 protein J6590\_079724 [Homalodisca vitripennis]"  
 /cog="COG3628 COG3628 116 Phage baseplate assembly  
 protein W"  
 /pfam="DUF2634 GPW\_gp25"  
 /product="hypothetical protein"  
 /translation="MKGMDAKTGKALEEIDHLKQSIIDILTTPVNSRIMRRSYGSRLF  
 ELVDKPINRDLTLEIYAATAEALGKFERRFKLEKVKIEGVKEGRVTLNLEGVYLPEGK  
 FINISGIVV"  
 /besthit="qcoverage 100 , hcoverage 100 , similarity 99.1  
 , identity 98.2 , evalue 3.67e-68 , alnlength 111 ,  
 Eukaryota , Arthropoda , KAG8290585.1 hypothetical  
 protein J6590\_079724 [Homalodisca vitripennis]"

gene complement(14142..14399)  
 /locus\_tag="wEsol\_01688"

CDS complement(14142..14399)  
 /locus\_tag="wEsol\_01688"  
 /codon\_start=1  
 /transl\_table=11  
 /product="hypothetical protein"  
 /pfam="PAAR\_motif DUF4150"  
 /translation="MNKGIVRLGDYCGEAIPHFCISGSNNVFVNGKSICRQGDSFSEG  
 KVMIQGSKTVFANGYGVGRVGDIVSCGFKVVKGSESVFFAK"  
 /cog="COG4104 COG4104 98 Uncharacterized conserved  
 protein"  
 /besthit="qcoverage 57.6470588235294 , hcoverage  
 58.3333333333333 , similarity 100 , identity 100 , evalue  
 2.04e-28 , alnlength 49 , Bacteria , Proteobacteria ,  
 WP\_038250997.1 PAAR domain-containing protein [Wolbachia  
 endosymbiont of Glossina morsitans morsitans]"

gene complement(14396..>14568)  
 /locus\_tag="wEsol\_01689"

CDS complement(14396..>14568)  
 /locus\_tag="wEsol\_01689"  
 /codon\_start=1  
 /transl\_table=11

```

/product="hypothetical protein"
/pfam="Pfam-B_2532 DUF2345"
/translation="EVSSLKFQDGTKFTYDKGKHHLEIEVADKITLKAGGSSSIEMTKS
GIKLKAERIDLN"
/cog="gpV COG4540 184 Phage P2 baseplate assembly protein
gpV"
/besthit="qcoverage 100 , hcoverage 36.3636363636364 ,
similarity 98.2 , identity 92.9 , evaluate 3.16e-28 ,
alnlength 56 , Bacteria , Proteobacteria , WP_172758481.1
phage baseplate assembly protein V [Wolbachia
endosymbiont of Diaphorina citri]"

```

# ORIGIN

```

1  caaacacttc cttctcaatt atcttcgaat gcgtacagca ccagcgttca atttgaagga
61  gcttagatgc cctataagga tcatcctcct taatagatga aaacaaaact tctggaatat
121 cctcacgata catagttacc tcccttaaaa tgaatgaaaa aacaccttga ttcttaaatc
181 tatggcctat cacaactaat caccactcag tgtgccatag gtatattact ctatctttaa
241 aacttttcaa tcacaatttt agaaaatttt ttagatttgg aataattttt gataacaggc
301 tcaatacatg atctttttatt tgttttttaa tttttttgtc ttgagcttgt actgattcct
361 ccataaacia actactatta atttagcaaa atataattatt aagatctcca gtaaaataac
421 catttccagc aacccaaacc aaaggttgtg agaagagttt gttttgggat ggcattgtct
481 gccgctagat ccgtgcgaac ttttttatat ggtaatttca ttgtacgcta aaaccaacta
541 tattagccta ctttagccat gtttacatac gaactgtttt gtataacttt gttacaacia
601 ttttacattc ttattttacac aacgccgctt ttgttttaaat tgttctcaca aaggtaggta
661 ctttcttgtg attttttgaa agagtaaatg atcaaactcc ttataatact aattagtatg
721 gtcttttcat taaatttatc ctctcaaaaa gactgtgctt tatccatcta ctttaaatag
781 atcataatat ttacaccta aacctattct ataaaaattc acaataggaa ttagtaataa
841 aattatgttc aaatcaattg aacttatgac atatagcaca tacaatatat tatctgttta
901 ttttagtaga ggggtatagg atgttttagt caaagcaggc agtacaatat aatttatttg
961 gtagtaacgg ccttgaaggc atttcatctt gtgaatttgc acattttcct gaagaggtat
1021 ttgagattag cagtgaagaa aatcaagtaa tagatagttt agaaagcaaa atagaaaatc
1081 tacaacaggg aaattttgat cttaaaaaaa atgtagagtt acaaaaacac tataagaaaa
1141 gagtagaaga gtattacgaa gaagcaagta aacttaccag agaaatgcaa accctagaag
1201 ggaaaattaa aaagcttgaa gttaaattac aaaaaaggac gagaagtcta actgaaaatg
1261 atcaagacat cgaacagcta aaacagaaaag tagaaatatt attattagaa actcagaaca
1321 aaagtgatgt aattaagaac ttaaataacc aattaaaga ggcaaagaat gaaattcagt
1381 taacagacia aataaatgaa gagttacagc aaaaattgga tttgactgaa gctgagctaa
1441 acagagtaag aaaagaaaag acagtgtctg taaacagtat agaggatttg aaaggtaatt
1501 atgaaaatca gatactagaa aaaaagaagg aacttaatga tataagagat caatttgtta
1561 ttatttcata ggagtataaa gagctgtttg cagaattcag tagactgcag aaggaaaacg
1621 agaattttaa acagaaaaat ttctatatca gtaatgaagt gtctcttgca gatgaaataa
1681 acaaagaaaa cgtaagaaaa gaaacagcaa gacctcagtc tatacatgaa gtagaaacca
1741 ggtgtattaa agataatgat gatcaagaac caacctggct acgtagagaa ggagaaaata
1801 atcaacatga taaaacaagt gaagataaaa accttgaaaa tatcgatttc gagattggag
1861 tatggaatga agctgataat gaaagtagcg atgatcataa atcaactcag ctatatggaa
1921 aaacagaaaa ttgtctaaca agtgaagata aaaatcttaa aaataccgat ttcccgattg
1981 aagtattgaa tggaacggat agtgaagatg aagacaatgt tagcccttgc cctgattatg
2041 atgaaagttt tggtaggcgt tacagttaac tattctacga tgcagacata atgcgcaaa
2101 aagattcttt ttctctagca aaaataaaat taaatgcaat agagataaaa aagtatgaaa
2161 gtattttggc aaaaatagat aagatccatg atgacctgaa tgttttgaat aaccgtggta
2221 acgacgaaga ttatgagaag tgcgaaaaag aatttgataa agttataagt gaagcactgg
2281 aacaaggaat aatgttctct tttccatata aatctgatat atccttggta gatcgtatag
2341 ctgacacatt gcaaaaagcta tatctttctt acgatactac tcaaatttat gaatttttag
2401 acaaaaaaaaa ggtattgcag ataatatcag aaggtgcatt tttaaataga tttagcgatg
2461 aagagcatga agatatagta aacgtaattt gttcagataa agatacctta gatcagcgaa
2521 aagcaaacct ttcaaagctg aaggagttag cacttgaaaag tattatgaat aaaagtgagc
2581 aaattgatga atatgacttt gaactagaaa tagataatgg atatttttgt ataggttatc
2641 cacaaaatag tactattgaa gttgcaaggg tattcgagaa tgaagaagct aaaggtttga
2701 atctaaacat tgggtgtact caagttggaa aaagtataat tagagttgaa aatataggag
2761 gaaagagaaa ttatacagag ttctcgggag atatcatcga aatgtctttt actgccgaaa
2821 taggagaaat cagtattcat ctatgtccta gtgagaaaag tagtaataaa atagaggtga

```

|      |             |             |             |             |             |             |
|------|-------------|-------------|-------------|-------------|-------------|-------------|
| 2881 | ggcttgctcga | tgaagtcaga  | tttaacaagt  | tagagaataa  | atcaaattta  | gggcagagtt  |
| 2941 | gtctgttagg  | gggaaaaagt  | gttttgacag  | ctatagaaaa  | tgggtatttc  | gaaagaaata  |
| 3001 | gtagtgtttt  | taaagagtca  | gagtgtataa  | tggaaaatcc  | atctagcttt  | ctagaggggg  |
| 3061 | tgaataaaaa  | tcaattactc  | agagcaaagt  | caagagctta  | tggctcgggga | ttatgatagt  |
| 3121 | tgctgtacat  | tgtagatata  | aaaataaggg  | ggatgaagat  | gcgtttttaat | ttagaaccag  |
| 3181 | gagatacttt  | ctgtgatggt  | aaaagtaagc  | ttgtaaatgt  | caaaataaat  | gacgacgaaa  |
| 3241 | gaattcactt  | gccttatata  | tcatatatct  | tcgataaata  | tcaacatttt  | atcatctcta  |
| 3301 | atttcaagct  | ggacccgatg  | aacagcatac  | taactaattt  | ttatcaacaa  | gagctatact  |
| 3361 | taaagctaga  | aaaagtaggt  | ggtgattaca  | agctggcttt  | ggttaatggc  | tcagatcaat  |
| 3421 | attattatgt  | ttactactat  | gatcccaata  | tttccaagat  | agctactttc  | aattctatac  |
| 3481 | ctagcaattt  | catagaatat  | cgaggccaag  | aatacattcg  | ttcttatgct  | ggagaatggt  |
| 3541 | cagtcgatct  | tgtgccgcta  | ataaatagta  | gggttctagt  | agatccaaaa  | gatataatga  |
| 3601 | gtaataaaga  | catagatttt  | gtcttaaaaag | agcttgaaaa  | gctgcctgat  | aagagactta  |
| 3661 | gaataggcgt  | tggaaaagaat | tttttaaggg  | gaccagaaaa  | agttctatca  | aatacttata  |
| 3721 | aaagtgcctga | agtatatgat  | atatatgata  | ataagattgg  | gatattgaat  | aatattgcta  |
| 3781 | ctagcttttag | taataaaaaa  | ttagagctat  | tctctggaaa  | tgtttctatc  | gataccatag  |
| 3841 | atcaatttgg  | tgctaattctt | agtcttaaaa  | agaccaatcc  | tagtttttaga | ataaaaagat  |
| 3901 | tgaataatga  | caattatgta  | ggatgcatgt  | taagtaagta  | tggtaaatgt  | gagagatttt  |
| 3961 | atgctctgac  | acctgagagt  | tttgagcaag  | aagaatatac  | ttatacagat  | tatgaggagg  |
| 4021 | aggagtttga  | ccagcagagt  | gactattttat | acccttatta  | ctactattta  | catggctctgg |
| 4081 | aggttactat  | gaataataaa  | aaattacaac  | aaagaatcga  | aaacttagaa  | aaaatagtta  |
| 4141 | gaaatttaaa  | tgatagcata  | gcattagtag  | ccggttttaa  | aggtgagcca  | ggtgaaaggg  |
| 4201 | gtatgcbgagg | tcttccaggg  | gcaagaggtg  | agtctggacc  | tggtggctct  | ccaggctcct  |
| 4261 | acggccaaaa  | aggtgagcca  | ggtgaattag  | tatgggatag  | aagacctgga  | gagaaaggtt  |
| 4321 | ttccagggtct | gaagggtgaa  | cgtggaataa  | tgggttacc   | aggtgaaaga  | ggtgagccc   |
| 4381 | gacttatttg  | tcctccgggt  | attccaggtc  | ttgatggtat  | tcctgggtgaa | ccgggaactc  |
| 4441 | ctgggcaaaa  | aggagataag  | ggggataccc  | caaagtctca  | agaaattgtg  | actaaattag  |
| 4501 | ttactagtaa  | aaaagctgag  | ttagtggaa   | cagttcttaa  | tacaaaggat  | atcaaagggtg |
| 4561 | aaaatcttgc  | aactcagatt  | gccggtaaaa  | ttaatcttaa  | ttcgcaggaa  | cttgtgaata  |
| 4621 | aaattgatgt  | agcaaaactt  | actgaaggag  | tagtaagtaa  | actttcttta  | gaggaagcaa  |
| 4681 | aaaacattat  | aaaagatact  | gtgagtaaga  | taacaagcga  | tgccacaaag  | aaaaataatc  |
| 4741 | ccgatccctat | agccttccaa  | aaatatgaaa  | aatttgcaga  | gaagcttgct  | gaactacttg  |
| 4801 | ttcgtagaag  | tagtatgagc  | gagaaagaag  | ctcaaactct  | tgtaaaagat  | aaggtaagtg  |
| 4861 | attggggact  | tgctaagtat  | cttctgattt  | atagtgattt  | aaatgagcaa  | ataaaagctc  |
| 4921 | tagaaatggt  | gaagaaagaa  | ataaatgagg  | aaaaattaat  | tcagtctttg  | cttgattatg  |
| 4981 | ctcaattaag  | aggcaatgca  | agcgcaacaa  | aaacaataat  | tgaaaatatt  | gttcatcagt  |
| 5041 | tccttgacac  | taaaaaagta  | ggtgaactag  | gaagagcagt  | actagaagca  | aaagacaatc  |
| 5101 | aaggtaaaaag | gatcttagtt  | aatgatccag  | ccttacaaaa  | aggagtagca  | gaagagttga  |
| 5161 | gaaaaaatcc  | tggacaaacg  | aaaggagata  | ctggaatacc  | aggtacacct  | ggactaaagg  |
| 5221 | gtgataaagg  | tttgcaaggt  | gaaagtggaa  | tgaagggggc  | aaggggttgg  | aaaggtgagc  |
| 5281 | ctggttctaa  | aggttttaaaa | ggtgagagag  | gagatatagg  | tcctaaagga  | gatactggaa  |
| 5341 | taccagggtac | acctggacta  | aaggggtgata | aaggtttgca  | aggtgaaagt  | ggaacgaagg  |
| 5401 | ggccaagggg  | ttggaaaggt  | gagcctggtt  | ctaaaggtct  | taaaggtgat  | caaagaaata  |
| 5461 | ttggtttcaa  | aggagatact  | ggctctaaag  | gtgataaaaag | tagagataca  | agtcctgaag  |
| 5521 | aagttgcaca  | aaaattaatt  | aataatggaa  | ctattgctaa  | tcaggtgctt  | gaataccgtg  |
| 5581 | accaagatgg  | agatttagta  | ttagagaagc  | aagttgcagg  | aagaatcatt  | agtaatcaag  |
| 5641 | atattcaaac  | aggaatagcc  | attgcattag  | ctgataacag  | aatggaagag  | ctagcagatg  |
| 5701 | tgttactacg  | tgggtgcta   | catacattag  | tagaaaaact  | tgcaaaataat | accgagctaa  |
| 5761 | tacaaagcat  | ttcagaagaa  | ctaaggaaaa  | atccaggaga  | agtcceaagg  | ccaaaagggg  |
| 5821 | gaaaaggaga  | tataggtcct  | aaaggattag  | acggagctat  | gggaataaaa  | ggtgataggg  |
| 5881 | gtgagaaagg  | agagataggt  | tttaaagggtg | acaaaggaga  | gccagggtgcg | aatggattgc  |
| 5941 | aaggtccaga  | aggtccaaaa  | ggatcagatg  | ggttgccagg  | acctaaggga  | gagataggtt  |
| 6001 | tgcaaggacc  | taaagggtcag | ggttggtgat  | ctggtcttaa  | gggtagtaaa  | ggagatactg  |
| 6061 | gtctaacggg  | aataccaggt  | cccaagggag  | aagatggaat  | aggtgctgca  | ttagctgata  |
| 6121 | agttttttgta | tgagataaaa  | aaagtaaaaga | atgaaactct  | gaatgctaaa  | gatgcagtag  |
| 6181 | aggtagccaa  | aaatgcttca  | gaaagttttg  | ctaaagaagc  | taaaaatgct  | aatgataaca  |
| 6241 | ttatagaact  | acacaataaa  | acagaaaact  | tcacaaagaa  | agctgaagtt  | ttctgcaatg  |
| 6301 | ctagcaaaaa  | atctgcaagt  | gatgcatctg  | tctcagaatc  | taataactcaa | actttttata  |
| 6361 | gtcaaacaca  | aaagatgttc  | tgtgtaatac  | agcctaatag  | taaaagttgt  | gttacaaaga  |
| 6421 | aaagaagaaa  | gagggaaata  | ataaactcac  | cagtgacaag  | cggagcaagc  | agaccaactt  |

|       |             |             |             |             |             |             |
|-------|-------------|-------------|-------------|-------------|-------------|-------------|
| 6481  | catttatatc  | tcaagtaata  | aatttctttt  | accctgcggt  | aggacaggat  | gaatataaag  |
| 6541  | taaaaaatga  | aatacaggaa  | gtagcaaaaa  | taataaatgc  | agcagatatt  | gtaacaaaat  |
| 6601  | ttgaagaagt  | attaggagca  | acagctgtga  | aatgtggcat  | ttcaaagaaa  | agtctaaatt  |
| 6661  | ttgatccagt  | agaactacag  | tcaaccatta  | tcaataagtc  | attacttaat  | gatgaaaatc  |
| 6721  | ataacgagtt  | gttgaagttc  | ttgtgtgtaa  | ctgcgaaaaa  | atcactccct  | aattacaaac  |
| 6781  | aaactagtaa  | atgtttgttt  | acttttaaaag | atcatatgga  | aaaaagatta  | aaagacaatg  |
| 6841  | agcaggaaaag | agctctcgtt  | aatactgaaa  | aaatagtggc  | agataatgag  | cagccaagga  |
| 6901  | gttttatgac  | ttatgttgct  | cctcctagta  | gcctcagtgc  | cattaatcag  | caagttgttg  |
| 6961  | gttattttaag | gtaatagcat  | gaaaaagtat  | acatttgaaa  | tagaagataa  | gaatccactt  |
| 7021  | tataaaaagc  | taattgagtt  | gcctactaca  | tattacagat  | taaagcataa  | taataacaaa  |
| 7081  | tatactatcc  | attcacacat  | tggtacggct  | gagctgggtg  | atgatactaa  | tggtttaaag  |
| 7141  | ttaaagaagc  | aggggtgataa | aatatttttta | tataaaggag  | cctcgcctct  | gaaggtgcac  |
| 7201  | aacacaaatg  | gcgaagtaaa  | ggacctagtt  | atagagcaag  | gagatattat  | tagtgaaaaa  |
| 7261  | aaaagtgata  | ttttggaaac  | gattaaaaca  | caagaaataa  | atattgtatt  | gaaggaaggg  |
| 7321  | agtggtatct  | cagactttgc  | tctcggatta  | tcttatttaa  | atgatgattt  | gagtacatta  |
| 7381  | actggaatgt  | tgctcttcat  | tgattttttat | aatgaagatg  | atccagcact  | acagaagatc  |
| 7441  | aaaggagaag  | aaggtaggct  | ttatttttaca | atagaagaag  | ataatatctt  | tgtatcagac  |
| 7501  | aaaaatggaa  | actgtcttcc  | ggtgtgtaaa  | gatggtagtt  | gctataaata  | tcaatacaca  |
| 7561  | aaaaataaac  | atgatataga  | aatcagttag  | atatcaaaaa  | taatagaaag  | cttaactaag  |
| 7621  | actaaggagt  | gtagtatatc  | agaaacaaca  | gaaagttcaa  | tcaaggccgg  | acagagtttg  |
| 7681  | actttgcagc  | aagaagagaa  | gttatcggag  | gatgatatgt  | atgaagcaga  | aaatggtaag  |
| 7741  | tgtatatcta  | ctttaccgaa  | aattgtctat  | catatgttca  | acaatgagtt  | tctcatacat  |
| 7801  | aaccatacta  | caaaagaaaa  | aggggtagaa  | attcctagag  | attttcatta  | ccttaaagtt  |
| 7861  | gttcagtccta | gtagtaatga  | tgattatcaa  | ttaacatttt  | gtaatttctt  | aggtaatgag  |
| 7921  | ttttttgaac  | ataaaaagta  | tgatccacaa  | tactcaaacg  | tttcagatga  | atataagtat  |
| 7981  | ataagtttaa  | actgtatgag  | aaaggaatat  | aaaccaaatt  | tctgcaagtt  | gcttaaccat  |
| 8041  | aagccatcgt  | tttttatcac  | agaagggact  | gctaatacaa  | attgtccatg  | tcactattca  |
| 8101  | gctgatatat  | atgaattaac  | aagtagtgga  | aaaggtagga  | aaatgactac  | attaactgac  |
| 8161  | caatttttact | cttttaacga  | ggattgtgat  | tgctatacaa  | acattgaaaa  | tcttggtctt  |
| 8221  | tttaactaag  | tatgggtcaaa | cttaaaaatg  | gcagttatag  | aactttttac  | aatagtcca   |
| 8281  | acagatcatc  | ttcggactat  | tataagaaaag | gctatacaga  | atttctctcc  | agatctacca  |
| 8341  | ttaaaatatg  | cagctaaaat  | tggtatacatt | ttctaccact  | gttgcatcta  | atatgctaaa  |
| 8401  | atcttaatta  | tttatattga  | tattttttgca | taattgattt  | tgtaacattg  | atttgctttt  |
| 8461  | ctatatcaat  | ctcaacatct  | tttggcaggc  | ccttcgtagc  | agctccttct  | ggcacatact  |
| 8521  | gttgcttttta | taaattaaga  | ccacaaaact  | tctccagttg  | ctcactccac  | agcatcggta  |
| 8581  | tttccctcaa  | gtcagctaac  | ttcaaaccct  | ttggctgcct  | cccattttact | atgtcttctt  |
| 8641  | taattctcgg  | agctaaataa  | tttaattctta | aaatttgctg  | tatacgtctt  | gtacctatat  |
| 8701  | taatttttcat | gctcagctct  | ttcacacttc  | tatatttttcc | ttcttctagt  | tgacgtttcc  |
| 8761  | aggaatgggc  | tcttaccact  | gctttgagta  | acgcattatt  | tgttttttgct | tctggctcta  |
| 8821  | ctaccatgca  | tttgtttccct | ttcttcttca  | ttgggtataag | tttctcctct  | gattcagaac  |
| 8881  | tcacctctat  | tccatcttct  | tttatcatta  | ctcctttttat | taactttttc  | actacttctt  |
| 8941  | tctgcttttc  | aaaacttaag  | tttttccatt  | tttcttcggt  | cttttctttc  | caatttttcat |
| 9001  | atagctgctc  | cactcccttc  | attacttctt  | tttctacttc  | tcctgctact  | attgttcgat  |
| 9061  | ttattgattc  | acaattcttt  | ccccttaagt  | gattgttaca  | tatgtaatat  | cgatatcttt  |
| 9121  | tatttttctt  | ttttgagtat  | gtcagcgtca  | tgttcacatt  | acaactcttg  | cacttaatta  |
| 9181  | ttcccctaag  | tagcgttcc   | tcataattttg | cttttctata  | tggttgattc  | tttatcaatt  |
| 9241  | cttgtgcttt  | ttgccatttt  | tcttctcteta | ttattgcttc  | atgttttccct | tcatactctt  |
| 9301  | tctcataatg  | cogtatTTTT  | cccatatata  | ttgggtttgt  | tattattctt  | ctcaccgtcg  |
| 9361  | ctttttttaa  | gatatactgat | tttgttctgt  | aaccttctct  | atttaactcc  | cttgccaatt  |
| 9421  | ctgcgattga  | ctttagctcc  | acatatcttt  | caaatatatg  | ctttactggt  | tttgcttctt  |
| 9481  | tctcatthtat | tattaattct  | ttatctttta  | catcataccc  | tagcggcaca  | gttccacca   |
| 9541  | tccataaacc  | ttgttctttt  | gatgttgcta  | ttttgttttt  | tactctctct  | acaatcatct  |
| 9601  | ctcttttctag | ttgtgctgct  | cctgataaca  | ctgtttgcac  | gaactttccc  | attggcgtat  |
| 9661  | tattatcaaa  | tatttggtgt  | actgctataa  | aattttactcg | atgccttcta  | aaaaatgatg  |
| 9721  | ttacttctat  | gctgtctttt  | gtttctcttg  | agagcctatc  | gagcgtatat  | accactacac  |
| 9781  | agtctatctc  | tcctcctttg  | acatcttcaa  | ataattcctt  | tattgctggg  | ctttctaaat  |
| 9841  | ttttccctga  | atagcctcca  | tcacgtacc   | ttttggccaa  | tgctaccag   | ccttctttgc  |
| 9901  | tctttatata  | tttctcacat  | gctactctct  | gcgcactctaa | actgtttaa   | ttttgttcta  |
| 9961  | gtccatcctc  | atthtgatttt | cttgatatata | tcgcgcactct | tacttctttt  | agcattttat  |
| 10021 | tctcttcaat  | tttcatthttt | atcacgcctc  | ccgaataata  | aaggtccggt  | gtaactcatt  |

|       |             |             |             |             |            |            |
|-------|-------------|-------------|-------------|-------------|------------|------------|
| 10081 | cccattat    | ttccggctac  | tgctgataat  | gatgtgaaaa  | attcttctcg | gtagattaaa |
| 10141 | cccttatctg  | ttaccattac  | tgcattgcgtt | tcctcacctc  | tctctagtag | taattctgtc |
| 10201 | ccttctactg  | gtaattttatc | gctactttatt | ctttttccct  | tctctagccg | atctgctaaa |
| 10261 | taatctagtc  | tttttgacac  | ttttcttgac  | atctctccgt  | acgctttttc | ctgcattcta |
| 10321 | taagctaata  | ttgggtatcag | atattttcttt | gagtatctag  | gcgcctcttc | cccaaatacc |
| 10381 | ttcttccata  | tttttctcag  | ctcatccaaa  | ggttttctct  | ctaaattcat | tactttcttt |
| 10441 | tctgtttctc  | tttccatatt  | ttcagcctct  | catagaaggt  | tctatttggt | caaataactt |
| 10501 | ttcaattctg  | cccatttctt  | tctttaatac  | ttcagttact  | tctttactat | ttttcgcata |
| 10561 | atccattgct  | gtcatttcaa  | atctatctgc  | ttgttctatt  | tctcctccag | ctttcactag |
| 10621 | ctcctccact  | atcttctttt  | ctcctaccat  | gcacgcaagg  | tgtagaggta | tgcatatttt |
| 10681 | tccatattcc  | tcagcattta  | cttctgctcc  | tgattttatc  | aattctctca | cgatttctag |
| 10741 | acgtttctcc  | gttaccgcta  | gatgcagtg   | tgtatatcct  | cttgcatctg | ctgcattcac |
| 10801 | attcactcct  | ttttcaacta  | ataacttcac  | tgtttttgcg  | tctactgcgt | aatgtagaac |
| 10861 | tgttctgtct  | cttgcataaa  | tatctttata  | tgagttctct  | aataattctt | ttgctgattt |
| 10921 | attaaaattt  | ccaagcttta  | acataatcca  | cctcaccttt  | tctttaaaat | caagtcacct |
| 10981 | ttttaagcct  | ttcttctctac | tacattttct  | gcctcatcta  | tcatttctgt | cactttgctt |
| 11041 | attatcttgc  | ttgctaaaatt | tttacattct  | tcctttatta  | acgatttgct | tctcttcctt |
| 11101 | atcttctccta | tctctattat  | ttttagctcc  | ggcatgtagc  | ttccattcaa | tatgtctgct |
| 11161 | atcttctcca  | ctagccctc   | tattccataa  | cacgtcagtt  | ctctactttt | tgttactcca |
| 11221 | cctttttctc  | tcagaaactt  | actcgccttt  | tcattctctt  | ctctattcca | tgaacaatac |
| 11281 | ttttcacttt  | cccatatgta  | atacattggt  | gttgccacct  | atctattcag | ttgattaacc |
| 11341 | tcagctcctg  | cttttactag  | ctcttttatt  | atctcaactc  | ctgctcctcc | tattttgcac |
| 11401 | gcagagtgc   | gtggcggtaca | tccagtgaca  | tattgagtgg  | catttacttc | tgctccttcc |
| 11461 | cttagcagca  | cttttacatt  | ttctaaactt  | tttgcgataa  | ctgcacagtg | tagtggtgta |
| 11521 | taaccattct  | tatctcttgc  | attaacctca  | gctccttttt  | ttattaataa | tctcactggt |
| 11581 | ttgtaatcgg  | agatttctac  | tgcttggtgt  | aatatcgtct  | ctccttcttc | atcttcttta |
| 11641 | ttaatgtttt  | tacttgatac  | ttcttttaaa  | aacttactct  | tgctaaaact | catttcatac |
| 11701 | ctcacaaaat  | tagcttttct  | agcgccagac  | aaatttctta  | tatttacctg | ccgctattca |
| 11761 | agtcattgtc  | tttttagcat  | gaaaaagcaa  | gtccttttct  | ttttatttca | tacattttta |
| 11821 | cctattatta  | atataatata  | tgataatcta  | aatataaata  | cttaacttat | tacacatatt |
| 11881 | gcttgactat  | ttttccaact  | tctgtgcaaa  | tgctgatggt  | catgccactt | tagtactcct |
| 11941 | gggtaaaata  | ctaaaatgta  | atctttcta   | tcgtgtattg  | agtccttttg | ctctaaatca |
| 12001 | tttttatagt  | aaacgtttgt  | ttctgctaaa  | acatattttc  | tgaccttctg | atctgtataa |
| 12061 | ttttttgctt  | tatagttgtg  | agtaacgcta  | aatcttttcta | aaattgggct | gtgtttttaa |
| 12121 | ttccaatatt  | gccctgaaag  | tttatcgctt  | cccaatacaa  | atctattttc | tctttcttct |
| 12181 | acgctactaa  | ctggaaagca  | cgtattttatg | tctcctaaat  | cccaactgtc | tgataatact |
| 12241 | atctgcgctt  | ttgcaaaattt | aatcgatggt  | aataaaactct | gtggtaaatg | atatagtgtc |
| 12301 | tttaagttgt  | accacaaatg  | atcttctttca | taaaataccgt | tataattctt | tgtgtgaggc |
| 12361 | tcggtttctc  | caaggattgc  | tacatctagg  | cgatatatat  | cattgcttaa | agctcggtca |
| 12421 | taatgatcgc  | gtagatagtt  | ttctataatc  | tctactaaca  | gacctctaga | actgaaaaaa |
| 12481 | tttattcttc  | caaacgataa  | cactggccca  | tttttttgaa  | cttttatacc | agagtagtct |
| 12541 | gataacaaac  | ttccaaaaaa  | gctttcatct  | aatataaacc  | tttcaacggt | gtagtggtca |
| 12601 | ttgaaaatcc  | tcatttagcct | cgatcttacg  | ggtaaatgata | gttttgcaag | ttctactact |
| 12661 | gcattctaca  | aaaagttatt  | tggaacatcc  | cttatcccta  | tctgcagttc | aaaaaaatgt |
| 12721 | ttccagggtg  | gttcttctgat | aattgtaata  | tcttttatat  | ttgcccattt | gagcgctatt |
| 12781 | ttgagtgatg  | ctggagttcc  | acgtagcctt  | tgaaaattta  | ctccttctac | tatcgctctt |
| 12841 | cttttatctt  | ttaccagcgc  | tagtatctcc  | cccaattcat  | attcctcaat | caaccacggc |
| 12901 | aatgtttctt  | cttttaagact | aaacttaaac  | cctctaatac  | agcctggatc | aacctataaa |
| 12961 | tctgttgcatt | caaccagtg   | ttgctcttgt  | ttgtgtgcat  | ttgggggtaa | tagcattact |
| 13021 | caacctttta  | atcttcgcaaa | tttgacatt   | cattacctag  | aaccacaaca | tcctcttttg |
| 13081 | gtcgcattaa  | ttccacattt  | tctacaccat  | ccacaaaata  | atctgatatt | atccaagatc |
| 13141 | ttgttacact  | ccacccta    | ctttttgcta  | attcaaaact  | ctgaataaac | tgcttcttta |
| 13201 | tttctctcct  | cgatatcaca  | ggacttatgc  | tcattctgct  | atgaatatct | atctccgtaa |
| 13261 | tattgcaacc  | aattactgtt  | atcgatcgg   | ttaaaaccct  | tatatcatct | ctagtaacct |
| 13321 | gcttttttac  | aatttcaagt  | agttcttctg  | acaccatgcc  | agttgttgtt | gataagattg |
| 13381 | aaatttgtag  | tttccctggt  | ataggtgatt  | ctactaatgc  | atcttttact | ctactatctg |
| 13441 | ccgacagtgc  | atgataacga  | taatactctt  | tgcttctctc  | tggtgaccac | ccctttat   |
| 13501 | ttgctttta   | tctttttcta  | aatcgttcgt  | cctcttcttc  | tttctgcctc | tccactccat |
| 13561 | aaaactcagc  | taaattatca  | agatcttctc  | ctttcgcaaa  | tttttagtaa | ttgctcttta |
| 13621 | ctgattcatt  | tattctttgt  | cttagtaaca  | attccctcca  | tgctgcaact | tccaaaacct |



```

gene      /collection_date="2018-11"
          /metagenome_source="insect metagenome"
          /note="metagenomic"
          complement(684..1067)
          /locus_tag="wEsol_01690"
CDS       complement(684..1067)
          /locus_tag="wEsol_01690"
          /codon_start=1
          /transl_table=11
          /product="hypothetical protein"
          /pfam="PDDEXK_2 Pfam-B_12519 Pfam-B_10245"
          /tigr="TIGR01784 T_den_put_tspse 273 conserved
          hypothetical protein"
          /translation="MAIFFKYAEETTDEDLRKIAEKSPIIKLAYDELDKFHWKEKDLV
          AYEERVMDLQKEAAILEQKLDDAKVEGRQEGIQIGREKGRAEGKEEGEKQTKIAVAKN
          SLKAGVSIIDVIAAPFLPKLASLPRP"
          /besthit="qcoverage 87.4015748031496 , hcoverage
          36.5131578947368 , similarity 85.6 , identity 85.6 ,
          evalue 4.63e-46 , alnlength 111 , Bacteria ,
          Proteobacteria , WP_063631093.1 Rpn family
          recombination-promoting nuclease/putative transposase
          [Wolbachia endosymbiont of Laodelphax striatellus]"
gene      complement(1019..1717)
          /locus_tag="wEsol_01691"
CDS       complement(1019..1717)
          /locus_tag="wEsol_01691"
          /codon_start=1
          /transl_table=11
          /product="hypothetical protein"
          /pfam="PDDEXK_2"
          /tigr="TIGR01784 T_den_put_tspse 273 conserved
          hypothetical protein"
          /translation="MYSLSLRPGNSPVSYDNVVGRLQHFGFPCCYPSYRIPTFILVG
          LSPTEQYSPSLDALGTEKNKDILIHFLNDILGFTGKNAIQDIEFLSTIQDPDIASKKQ
          SIVDVLCRDSTGARYVIEMQLARDKGFEKRAQLYAAKAYSQRADKGGKYIDLKKVFFI
          AISNCNLFPDKPDYISSHTIRDEKTNEHDLKDFQFIFIELPKFPKNREEQLENVVDRW
          LFFSNTQKKQLMKI"
          /besthit="qcoverage 95.2586206896552 , hcoverage
          64.8093841642229 , similarity 91.4 , identity 80.5 ,
          evalue 9.27e-127 , alnlength 221 , Bacteria ,
          Proteobacteria , WP_007303034.1 Rpn family
          recombination-promoting nuclease/putative transposase
          [Wolbachia endosymbiont of Culex quinquefasciatus]"
gene      2052..2177
          /locus_tag="wEsol_01692"
CDS       2052..2177
          /locus_tag="wEsol_01692"
          /codon_start=1
          /transl_table=11
          /fullproduct="qcoverage 100 , hcoverage 87.2340425531915
          , similarity 90.2 , identity 85.4 , evalue 1.86e-13 ,
          alnlength 41 , Bacteria , Proteobacteria , RDD35061.1
          hypothetical protein Wcon_00798 [Wolbachia endosymbiont
          of Cylisticus convexus]"
          /translation="MIKMPIKLQDLRRNQSESRTGMAILGNLCSRLQDGDGTGRSI"
          /product="hypothetical protein"
          /besthit="qcoverage 100 , hcoverage 87.2340425531915 ,
          similarity 90.2 , identity 85.4 , evalue 1.86e-13 ,
          alnlength 41 , Bacteria , Proteobacteria , RDD35061.1
          hypothetical protein Wcon_00798 [Wolbachia endosymbiont

```

```

of Cylisticus convexus]"
gene      2152..3387
          /locus_tag="wEsol_01693"
CDS       2152..3387
          /locus_tag="wEsol_01693"
          /codon_start=1
          /transl_table=11
          /pfam="RVT_1 MutL_C GIIM"
          /fullproduct="qcoverage 100 , hcoverage 91.9463087248322
, similarity 95.9 , identity 92.7 , evaluate 4.19e-270 ,
alnlength 411 , Bacteria , Proteobacteria ,
WP_007302360.1 MULTISPECIES: group II intron reverse
transcriptase/maturase [unclassified Wolbachia]"
          /translation="METLEEAYKLTKKSNAGPIDGMTFESIEAEGLEKYLQQIRHAL
ITKTYSPNRNRKEIPESGGKFRKLNIPCIDRIVQTALKLILEPIFESDFQKGSYGY
RPKRIAHEAVQKVTEAAIKGNTKVIDVDLKSIFYDNVRHHILMEKIAKRINDKENMRMI
KLILITGGKRGIAQGSPLSPLLSNIYLNEVDKMLEKAKEVTKEGKYQRMECARWADDL
VILISEHPKREWLERAVYRRLLEEELAKLEVSVNEEKTQVINLKKGETFSFLGFDFQEN
ITRQGKWNVRKTPQMKARTNLLRKLKEIFRRYKSQPIKRVIHDINPILRGWVNYFRIG
NSGRKFNYVKHCVEKKVRRNLMRARKAKKGFGWKKWSSEWIHKTGLYSDYRIRIYKP
KASPVQYVINFGKESARKA"
          /product="group II intron
reverse transcriptase/maturase"
          /besthit="qcoverage 100 , hcoverage 91.9463087248322 ,
similarity 95.9 , identity 92.7 , evaluate 4.19e-270 ,
alnlength 411 , Bacteria , Proteobacteria ,
WP_007302360.1 MULTISPECIES: group II intron reverse
transcriptase/maturase [unclassified Wolbachia]"
gene      3393..3584
          /locus_tag="wEsol_01694"
CDS       3393..3584
          /locus_tag="wEsol_01694"
          /codon_start=1
          /transl_table=11
          /product="hypothetical protein"
          /translation="MLRLTRRELETLTWEFGLRPIVKTMDQPPNSKVGAPVLDPTDTA
KGDIIILRIEKLKSHNELT"
          /besthit="qcoverage 65.0793650793651 , hcoverage
89.1304347826087 , similarity 97.6 , identity 97.6 ,
evaluate 8.90e-20 , alnlength 41 , Bacteria ,
Proteobacteria , ONI56643.1 hypothetical protein
N500_0273 [Wolbachia pipientis wUni]"
gene      3862..4707
          /locus_tag="wEsol_01695"
CDS       3862..4707
          /locus_tag="wEsol_01695"
          /codon_start=1
          /transl_table=11
          /pfam="RNA_pol"
          /fullproduct="qcoverage 93.2384341637011 , hcoverage
85.3420195439739 , similarity 92.4 , identity 86.6 ,
evaluate 4.04e-140 , alnlength 262 , Eukaryota , Arthropoda
, GFQ94753.1 uncharacterized protein TNCT_502721
[Trichonephila clavata]"
          /translation="MLVQLLSKASKQLKGHCALLSSEEKQSLYSEVINEVKNTPRNSR
GCIDQLKKLSKMAVAIEETIDSKLLEKFNDGHPLEVNIAIYAPEEAKNYLFSLSDDS
DLYDLKEDREKAIYQAIKSNDRELVKHLLMILTSGDKEIEFFKELETLLESEIYEELKE
KLSQDMENYLEKNISLKRFCNNVDVLIKPVDIRAMINLFIQSGVNYKIDELLLIK
IAEGLEGGELRSQINQMIETLKKHERFVELEYKVRRLKSELASGEEHRRTRKRNERDW
ELLAW"

```

/product="uncharacterized protein TNCT\_502721"  
 /besthit="qcoverage 93.2384341637011 , hcoverage  
 85.3420195439739 , similarity 92.4 , identity 86.6 ,  
 evalule 4.04e-140 , alnlength 262 , Eukaryota , Arthropoda  
 , GFQ94753.1 uncharacterized protein TNCT\_502721  
 [Trichonephila clavata]"

ORIGIN

```

1  tacttgttgtt ggcttgctga gcagcgaagc tgctggaagg tagtgggggat acgcttaggc
61 gtagactacg ggacgccctt gggcgtgagc agcaaggagc cacaaaagat ttataaaagt
121 tacgtggacg tcgggttttg ggatcaagcc cagaacaacc tgtccgatgc aaccatccct
181 tgcacgagac aactgaaca gagtatgacc gtcctaaaaa gattcttttc tggcaaatgc
241 agcaaaacca tttctcatga ccgggggtcag gagacggacc cggattgggt tcgatacttc
301 ccggagtaag agaatatgta gcagtcctgc tgcaaggagc tgctgggagg atgacaattt
361 gtgggaggga cgaaacaatt aaatgggggtc acactgaaat gacagtcctt ggtcgggaaa
421 atcccagatc gctcgcgtac atagaaccga ctgccttgga agcgagacag gtttagattc
481 ccccgtagaa ccggggtaaa gataaaagaa aaaacacaat atacatggct cgggagaaaa
541 ccgttcagga gtaacggagc atcacacggc gcatagttga atgcgtcttc atgtcccgtg
601 ctcacctttc ccattgccat cgcgtagtaa ggtgtaggat tgccctccgt agactcgtct
661 cgagacgggg ggtttgctta taattagggc ctcgggaggg acgcaagctt agggagaaac
721 ggggcagcga taacatcaat agagacaccg gccttgagtg agtttttggc aacagctatt
781 ttagtctgtt tttcacctc ttccttacct tcagctctac ctttttcacg gccaatttgg
841 ataccttctt gtctaccttc tactttagca tcatcgagtt tttgttctaa gatagcagct
901 tctttctgta aatccattac tctttcttca taagccacta ggctccttct cttccaatga
961 aacttatcta attcatcata tgctagcttt attattggtg atttttctgc tatttttctc
1021 aaatcttcat cagttgtttc ttctgcgtat ttgaaaaaaa tagccaacga tctactacat
1081 tttctagctg ctcttctcta tttttaggaa attttgcaa ctcaatgaag ataaattgaa
1141 aatcttttaa gtcatgctcg ttagtttttt catctcttat ggtatggcta gatataata
1201 caggcttatc aggaaataaa ttacaattgg aaatagcaat aaagaaaacc ttctttaaat
1261 caatgtactt accaccttta tcagcctgcc ttgagtaagc cttagcagca tataattgag
1321 cccgtttttc gaagccttta tcacgagcaa gttgcatctc aatcacgtat ctggccccag
1381 tggaatctct acagaggaca tcaacaatac tttgcttttt agaggcaata tcagggtctt
1441 gaatagtact taaaaactct atatcctgta ttgcattttt gccagtaaaa ccagagaat
1501 cattgaggaa gtgaatgagg atgtctttat tcttttcagt accaagtgcg tccagagaag
1561 gtgagtattg ttcagtagga gatagacctt ccaggataaa agtcggaatc ctgtaacttg
1621 gtagcagca tggagggaaa ccaaaatgtt gaagcctacc gacaacatta tcgtaggata
1681 cgggcgaatt accaggccgt agcgaagcgc aatacacaga ttgcctcgaa agaaatattc
1741 tgaaggtcga gccatcttgg tactggcgaa gacagaatag accagacgaa aaacgaatga
1801 aacgattggt ctacttcagc ggggtgttag taacggcatg gcaatgagga catacaaagc
1861 aactggagaa gccctcctca tcccaaggag aaataccttg gagatagggt ctataactgg
1921 aaaacaggaa gtgaaccgaa gatgagaggg tggcggatgg gtgcgtagta gtgaagaagt
1981 gaggtaacgc tcatggagca aaggcaccct gctagtagaa atcttttaac aaaaggaagg
2041 taaaggtaaa aatgataaaa atgccaataa aattacaaga cctgagaaga aatcaaagcg
2101 aaagcagaac cggaatggcg attctgggga atctatgttc acgtctgcaa gatggagaca
2161 ctggaagaag catataagct aacaaagaag agtaatggtg caccaggaat agatgggatg
2221 acattcgaat cgatagaggc agaaggctta gaaaagtatc ttcaacaaat aagacacgca
2281 ctaataacca agacctatag ccaaataagg aaccggagga aggaaatacc agaacttgga
2341 ggaaaattca gaaagttgaa cataccctgc atccgggata gaatagtgca aacagcactg
2401 aagctaatac ttgaaccgat attcgaatca gacttccaaa aaggatcata cgggtataga
2461 cctaagcgta ttgcgcatga agcagtacaa aaagtaacgg aagcagcaat caaaggcaat
2521 acaaaaagtaa ttgacgtaga tctgaaatcc tacttcgaca atgtgcgaca tcatattctg
2581 atggaaaaga ttgccaaaag aataaatgac aaagaaaaca tgcgcatgat taagctaatc
2641 ctcataacag gaggaaaacg aggaatagca caaggatcac cactttcgcc actactaagc
2701 aatatatacc taaatgaggt agataaaatg ttggagaaaag caaaagaggt gaccaaagaa
2761 ggaaagtacc aacgtatgga atgtgccaga tgggcagacg atttagtgat actgattagt
2821 gaacacccga aacgggaatg gctagaaaaga gcagtataca gaaggttgga agaagaatta
2881 gcaaaactag aagtgagcgt aaatgaagaa aagacaaaag tcatcaacct aaagaaagga
2941 gaaacattta gcttcctagg gtttgatttt caagagaata tcacaagaca aggaaagtgg
3001 aatgtcagga aaacaccgca gatgaaagca cgaacaaacc tgctacgcaa gttgaaggaa
3061 atatttcggc gctataaatc gcaaccgata aaaagagtga tacatgacat caatccgata
3121 ttgagagggt gggtaaaacta ctttaggata gggaaactct ggcgaaagtt caattacgta

```



```

/mol_type="genomic DNA"
/submitter_seqid="contig_24440"
/isolate="wEsol"
/isolation_source="galls on Solidago altissima"
/host="Eurosta solidaginis MN-2018-EFC"
/db_xref="taxon:955"
/environmental_sample
/country="USA: Cowling Arboretum, Carleton College,
Northfield, MN"
/lat_lon="44.48 N 93.13 W"
/altitude="280 m"
/collection_date="2018-11"
/metagenome_source="insect metagenome"
/note="metagenomic"
gene complement(<1..1333)
/locus_tag="wEsol_01696"
CDS complement(<1..1333)
/locus_tag="wEsol_01696"
/codon_start=1
/transl_table=11
/pfam="DUF445 MgtE_N Pfam-B_3639 Pfam-B_2960 T4_baseplate
MgtE_N MgtE_N MgtE_N"
/fullproduct="qcoverage 100 , hcoverage 89.6969696969697
, similarity 100 , identity 99.8 , evalue 6.79e-198 ,
alnlength 444 , Bacteria , Proteobacteria ,
WP_197907253.1 MgtE intracellular N domain protein
[Wolbachia endosymbiont of Kradibia gibbosae]"
/translation="MSGKKHVFKMVPKGKEVFRKTPTKLIKWPEGYDPTISIKKVELVS
LDDKNDVALGLLPIKLCGSSCLDSYICLEEENEGNLVAKDYKSDSNLDYVKSNTFTVY
YGNELAKLSYTRELVQPFKTMCSSEIKSKKLEYKYVTWEDSDTGNNKYYSDEAGNII
DSPDNEVLQDIMLYYGERHIRDVLLLLSSTFTKVFIQGLTDDQLKTLTNTLSNEQLQK
IIPELSSSQLOTAKNLTDQLQALVDHLTNHQLQTLAQELNPEKLQIIVPILNDAQL
EALVRDLNPEQVKEILPHLKVDQFKALIKTLNDEQFTVLAKDLAEHHLTILSKELEGD
QLKALVNSLQEDQLKDLVNKLHDHKLGIIAQDLTDSNRIQIIKSLANNPEKLQAFAR
NMSNEQFKELLDNVGAEEELKDIIHKLPYEKVTAVIGDLGSKDQSKAIIIDALK"
/product="MgtE intracellular N domain
protein"
/besthit="qcoverage 100 , hcoverage 89.6969696969697 ,
similarity 100 , identity 99.8 , evalue 6.79e-198 ,
alnlength 444 , Bacteria , Proteobacteria ,
WP_197907253.1 MgtE intracellular N domain protein
[Wolbachia endosymbiont of Kradibia gibbosae]"
gene 2042..3304
/locus_tag="wEsol_01697"
CDS 2042..3304
/locus_tag="wEsol_01697"
/codon_start=1
/transl_table=11
/fullproduct="qcoverage 100 , hcoverage 100 , similarity
100 , identity 100 , evalue 0.0 , alnlength 420 ,
Bacteria , Proteobacteria , WP_015589304.1 MULTISPECIES:
NADH-quinone oxidoreductase subunit NuoF [unclassified
Wolbachia]"
/cog="NuoF COG1894 424 NADH:ubiquinone oxidoreductase,
NADH-binding (51 kD) subunit"
/pfam="Complex1_51K SLBB NADH_4Fe-4S"
/tigr="TIGR01959 nuoF_fam 410 NADH oxidoreductase
(quinone), F subunit"
/product="NADH-quinone
oxidoreductase subunit NuoF"

```

```

/translation="MLKEQDKIFTNLNGKETPLLEGAKKRGSWQKTKELLDLGSEKII
DEVKKSGLRGRGGAGFSTGLKWSFMPKNLPKKQPTYLVVNADESEPGTCKDRDILRYE
PHKLLEGILLAGRAISASVAYIYIRGEFYNEYLVLKKALEEAYKEGLIGNACKSGYD
LDVFIHRGAGAYICGEETAQLESIEGKKGFPRMKPPFPAGVGLFGCPTTINNVIAM
VPDILNRGGGEWFASLGKPNNTGTVFCISGHVNNPCNVEEELGIPLRELIEKYAGGVR
GGWDNLLAVIPGGSSVPLIPKSICDTIEMDFDSLRTAQSGLGTAIVMDKSTDIIAA
IERLSHFYMHESCGQCTPCREGTGWMWRIMKRMVAGDIKPDEIDKLLDLTTQIEGHTI
CALGDAAAWPIQGLIRHFRHVIKERAIV"
/besthit="qcoverage 100 , hcoverage 100 , similarity 100
, identity 100 , evaluate 0.0 , alnlength 420 , Bacteria ,
Proteobacteria , WP_015589304.1 MULTISPECIES:
NADH-quinone oxidoreductase subunit NuoF [unclassified
Wolbachia]"
gene complement(3333..3851)
/locus_tag="wEsol_01698"
CDS complement(3333..3851)
/locus_tag="wEsol_01698"
/codon_start=1
/transl_table=11
/fullproduct="qcoverage 100 , hcoverage 100 , similarity
100 , identity 100 , evaluate 1.30e-113 , alnlength 172 ,
Bacteria , Proteobacteria , WP_015589305.1 MULTISPECIES:
translation initiation factor IF-3 [unclassified
Wolbachia]"
/cog="InfC COG0290 176 Translation initiation factor 3
(IF-3)"
/pfam="IF3_N IF3_C"
/tigr="TIGR00168 infC 165 translation initiation factor
IF-3"
/product="translation
initiation factor IF-3"
/translation="MQVKKNKNRINGFITAKEVRLVDHSGEMVGIVLIERALELAQG
VGLDLVEIAPDSTPPVCKILDYSKQKYDIKKKASEAKKKQKTTLTIKEIKLGPNIQDHD
YGTKLRQARDLLAHGHKIKVTMRFKGRELINTEVGLEKLERLIRDTEDIAKVELAPKR
EGNQYFLALVAK"
/besthit="qcoverage 100 , hcoverage 100 , similarity 100
, identity 100 , evaluate 1.30e-113 , alnlength 172 ,
Bacteria , Proteobacteria , WP_015589305.1 MULTISPECIES:
translation initiation factor IF-3 [unclassified
Wolbachia]"
gene complement(3864..5765)
/locus_tag="wEsol_01699"
CDS complement(3864..5765)
/locus_tag="wEsol_01699"
/codon_start=1
/transl_table=11
/fullproduct="qcoverage 100 , hcoverage 100 , similarity
100 , identity 99.8 , evaluate 0.0 , alnlength 633 ,
Bacteria , Proteobacteria , WP_141456657.1 MULTISPECIES:
threonine--tRNA ligase [unclassified Wolbachia]"
/cog="ThrS COG0441 589 Threonyl-tRNA synthetase"
/pfam="Pfam-B_16438 tRNA_SAD tRNA-synt_2b HGTP_anticodon"
/tigr="TIGR00418 thrS 565 threonine--tRNA ligase"
/product="threonine--tRNA
ligase"
/translation="MIRITFSTEQKVKEYSGKVTGFDILQPNVLKEAVALKVNGLYD
LSREIESDTEIEVIQLSDEAGLDIIRHDAAHMAQAVKELFPNTQITIGPTIQDGFYY
DFATDRFTTDDLTAIEKKMKEIVKSNHRFVREWTRKQAIIDFFSGIGEKYKVDIIS
IPEGENLTVYRQGD FIDLCRGPSPSTGRVKAFLMKVAGAYWRGDAKGPMQLQRIYGT
AWRNKDELNAYLECLKEAEKRDHRKIAKDMDLFHIQEEAVGQVFWHEQGYILYNVLES

```

```

YIRKKLINNGYFEVKTPILVSKELWEKSGHWDKFRENMFIVDESESKKLAIKPMNCPC
HVQIFNSHTRSYPDLPIRMAEFGTCHRNESGSLHGLMRVRGFTQDDAHIFCMEEQVN
SETIKFCDLLKEVYSELGFNEISVKFSDRPGIRAGNDEVWDRAEKALLEAVKEAGLSY
KLNPGEAFYGPKEFLVKDAIGRSWQCGTLQVDFILPERLGAFYIGADGHKHPVML
HRAILGTFERFIGILIENYAGKFPVWLAPTQLAILTITNEADGYATEISNVLKEQGVR
VKTDLTNEKISYKIRLHSLNKVPILWIVGKNEVTSKTVSVRNLGSEKQESFSLEKANE
SLLKSINLN"
/gene besthit="qcoverage 100 , hcoverage 100 , similarity 100
, identity 99.8 , evalue 0.0 , alnlength 633 , Bacteria ,
Proteobacteria , WP_141456657.1 MULTISPECIES:
threonine--tRNA ligase [unclassified Wolbachia]"
CDS complement(5762..5977)
/locus_tag="wEsol_01700"
complement(5762..5977)
/locus_tag="wEsol_01700"
/codon_start=1
/transl_table=11
/fullproduct="qcoverage 100 , hcoverage 100 , similarity
100 , identity 100 , evalue 1.78e-43 , alnlength 71 ,
Bacteria , Proteobacteria , WP_144054593.1 MULTISPECIES:
hypothetical protein [unclassified Wolbachia]"
/translation="MLNVMACFASNTKVSSQCLTLGSRKYNICKLCNGQQILGAYVKL
ISIIKIRWIPVSRTGMTKRGLDKRVDK"
/product="hypothetical protein"
/gene besthit="qcoverage 100 , hcoverage 100 , similarity 100
, identity 100 , evalue 1.78e-43 , alnlength 71 ,
Bacteria , Proteobacteria , WP_144054593.1 MULTISPECIES:
hypothetical protein [unclassified Wolbachia]"
CDS complement(5971..6093)
/locus_tag="wEsol_01701"
complement(5971..6093)
/locus_tag="wEsol_01701"
/codon_start=1
/transl_table=11
/fullproduct="qcoverage 100 , hcoverage 100 , similarity
97.5 , identity 97.5 , evalue 1.03e-20 , alnlength 40 ,
Bacteria , Proteobacteria , QEF50607.1 hypothetical
protein EA652_0926 [Wolbachia endosymbiont of Drosophila
ananassae]"
/translation="MFRAYNPVIHYDLGAVPTRGGVIQVADTQLYEHLFARAVC"
/product="hypothetical protein"
/gene besthit="qcoverage 100 , hcoverage 100 , similarity 97.5
, identity 97.5 , evalue 1.03e-20 , alnlength 40 ,
Bacteria , Proteobacteria , QEF50607.1 hypothetical
protein EA652_0926 [Wolbachia endosymbiont of Drosophila
ananassae]"
CDS complement(6093..6602)
/locus_tag="wEsol_01702"
complement(6093..6602)
/locus_tag="wEsol_01702"
/codon_start=1
/transl_table=11
/fullproduct="qcoverage 100 , hcoverage 100 , similarity
100 , identity 100 , evalue 2.59e-98 , alnlength 169 ,
Bacteria , Proteobacteria , AGK00243.1 NADH-quinone
oxidoreductase subunit I [Wolbachia endosymbiont of
Drosophila simulans wHa]"
/cog="NuoI COG1143 172 Formate hydrogenlyase subunit
6/NADH:ubiquinone oxidoreductase 23 kD subunit (chain I)"
/pfam="Fer4_18 Fer4_8 Fer4_17 Fer4 Fer4_10 Fer4_2 Fer4_6

```

```

Fer4_15 Fer4_8 Fer4_4 Fer4_13 Fer4_7 Fer4_16 Fer4_9
Fer4_17 Fer4_2 Fer4_10 Fer4_6 Fer4_18 Fer4_13
Fer4_15 Fer4_8 Fer4_4 Fer4_16 Fer4_17 Fer4_3"
/tigr="TIGR01971 NuoI 121 NADH-quinone oxidoreductase,
chain I"
/product="NADH-quinone oxidoreductase subunit
I"
/translation="MTDTSFKYFMLKKLAWYWSFAELIKGFAITLKYMFKPKVTLRYP
MEKGPLSPRFRGEHALRRYPNGEERCIACKLCEVICPAQAIVIEAEEREDGSRRTTRY
DIDMTKCIYCGLCQEACPVDAIVEGPNFEFATETREELMYNKEKLLRNGEIWEDAIAL
RLKKNRPYY"
/besthit="qcoverage 100 , hcoverage 100 , similarity 100
, identity 100 , evalue 2.59e-98 , alnlength 169 ,
Bacteria , Proteobacteria , AGK00243.1 NADH-quinone
oxidoreductase subunit I [Wolbachia endosymbiont of
Drosophila simulans wHa]"
gene 6798..8126
/locus_tag="wEsol_01703"
CDS 6798..8126
/locus_tag="wEsol_01703"
/codon_start=1
/transl_table=11
/fullproduct="qcoverage 100 , hcoverage 100 , similarity
100 , identity 100 , evalue 3.05e-311 , alnlength 442 ,
Bacteria , Proteobacteria , WP_015589308.1 MULTISPECIES:
tRNA uridine-5-carboxymethylaminomethyl(34) synthesis
GTPase MnmE [unclassified Wolbachia]"
/cog="ThdF COG0486 454 Predicted GTPase"
/pfam="TrmE_N MMR_HSR1 FeoB_N AAA_17 AAA_28 AAA_18
GTPase_Cys_C"
/tigr="TIGR00450 mnmE_trmE_thdF 446 tRNA modification
GTPase TrmE"
/product="tRNA
uridine-5-carboxymethylaminomethyl(34) synthesis GTPase
MnmE"
/translation="MTNTNETIFALSTVFGKSGVAVIRISGNALNALNHFIKKEIK
PRFATLVLDLYDDFNQLIDNGIIIIYFPAPNSFTGENVIELQVHGSKAVIKIILEELSKI
FVMARPGEFSLRAFLNGKFDLTQIEGIADLIDAETKMQAQAIKQISGELERLYSNWR
QRLITIQSKIEAYIDFPEDIWAEKSELEKINNEVQSLVRLIQEHLNDNRRGERLREGL
HIVITGKPNVGKSTLFNFLAKRDIAIVSEYAGTTRDILEAHIDIGGYPIILSDTAGIR
ESSDPIESEGISRAKKRSFEADLRLELFPFEQRHNINCNVVNSDTIYVLSKADDVINN
HNIKINGIDLLPISILKEIGTNKLISLIKEAEKFGHHRDTPVITRQRHRNHMKKAL
EHLQRFNIDNPIELISEDRLAAAFELGAVIGIIDVEEILSSVFSNFCVVGK"
/besthit="qcoverage 100 , hcoverage 100 , similarity 100
, identity 100 , evalue 3.05e-311 , alnlength 442 ,
Bacteria , Proteobacteria , WP_015589308.1 MULTISPECIES:
tRNA uridine-5-carboxymethylaminomethyl(34) synthesis
GTPase MnmE [unclassified Wolbachia]"
gene 8430..9446
/locus_tag="wEsol_01704"
CDS 8430..9446
/locus_tag="wEsol_01704"
/codon_start=1
/transl_table=11
/fullproduct="qcoverage 100 , hcoverage 100 , similarity
100 , identity 100 , evalue 1.01e-245 , alnlength 338 ,
Bacteria , Proteobacteria , WP_174516794.1 MULTISPECIES:
NAD(P)/FAD-dependent oxidoreductase [unclassified
Wolbachia]"
/cog="TrxB COG0492 305 Thioredoxin reductase"

```

```

/pfam="Thi4 Pyr_redox_2 HI0933_like DAO FAD_oxidored
Pyr_redox_3 NAD_binding_8 Lycopene_cycl HI0933_like
NAD_binding_9 K_oxygenase Pyr_redox_3 FMO-like
NAD_binding_7 Pyr_redox"
/tigr="TIGR01292 TRX_reduct 300 thioredoxin-disulfide
reductase"
/product="
NAD(P)/FAD-dependent oxidoreductase"
/translation="MKTDIVIIIGAGPVGIFTAFQAGMLDMKCHIIDVLDQAGGQCTAL
YPEKPIYDIPGYPVITAQKLIEQLMEQASPFKPIYHLSQKVEKISNNCDQSFIITNT
GTEVKCKAVIVAAGNGMFEFNRPPPLNGILEYENKSVFYSVNKISDFQDKTIVIAAGGD
SAADWTVELSKVAKKIYVIHRRKEFRCTPETRNKLESLESDGKIELVVPYQLHELGG
NGQLSTVIVKNIASKEEKEISADFLLPFFGLSMNLGPINNNGIQLEHSRIVVDPATLK
TSRDRIYAIGDIAIYSGKLLKILSGFAESAMACHDIYKVIHNSPVNFQYSTSGIHGK
EKLP"
/besthit="qcoverage 100 , hcoverage 100 , similarity 100
, identity 100 , evalue 1.01e-245 , alnlength 338 ,
Bacteria , Proteobacteria , WP_174516794.1 MULTISPECIES:
NAD(P)/FAD-dependent oxidoreductase [unclassified
Wolbachia]"
gene complement(9698..9874)
/locus_tag="wEsol_01705"
CDS complement(9698..9874)
/locus_tag="wEsol_01705"
/codon_start=1
/transl_table=11
/fullproduct="qcoverage 100 , hcoverage 100 , similarity
100 , identity 100 , evalue 5.66e-30 , alnlength 58 ,
Bacteria , Proteobacteria , WP_179945717.1 MULTISPECIES:
hypothetical protein [unclassified Wolbachia]"
/translation="MKKKAKEALGLLSALKYWRFLCFKRLTSEIKLLLLIATNLRCKRL
RNLLSRKKDKESPS"
/product="hypothetical protein"
/besthit="qcoverage 100 , hcoverage 100 , similarity 100
, identity 100 , evalue 5.66e-30 , alnlength 58 ,
Bacteria , Proteobacteria , WP_179945717.1 MULTISPECIES:
hypothetical protein [unclassified Wolbachia]"
gene complement(10182..11090)
/locus_tag="wEsol_01706"
CDS complement(10182..11090)
/locus_tag="wEsol_01706"
/codon_start=1
/transl_table=11
/fullproduct="qcoverage 100 , hcoverage 100 , similarity
100 , identity 99.7 , evalue 1.36e-209 , alnlength 302 ,
Bacteria , Proteobacteria , ACN95649.1
3-oxoacyl-(acyl-carrier-protein) synthase III [Wolbachia
sp. wRi]"
/cog="FabH COG0332 323 3-oxoacyl-"
/pfam="Chal_sti_synt_N Thiolase_N FAE1_CUT1_RppA
ACP_syn_III ACP_syn_III_C"
/tigr="TIGR00747 fabH 322
3-oxoacyl-[acyl-carrier-protein] synthase III"
/product="3-oxoacyl-(acyl-carrier-protein)
synthase III"
/translation="MLSNNEIASIVETSDEWIRQRTGIVQRHIADEGELTSDLAVNAA
KSAIEKAKISVDEIDLIIIVATTTDPDKTFPSCATIVQSKLKCKNAFAFDVQAACSGFIY
AVTVADSLIKSNNRIKYALVIGAEIMSRIVDWEDRSTCVLFGDGAGAVVMKSEMGRSG
IISTNLYSDGNVDILCTNGGVSSSTGDSGKICMNGREVFKHAVDKLTASVEETLKCNNL
KITDIDWLIPHQANIRIIEAVVKKLDFPIEKVINTVDKHANTSAASIPLALDYAIQES

```

```

      KIKSGNLVLLISIGAGLTWGSVLLHY"
      /besthit="qcoverage 100 , hcoverage 100 , similarity 100
      , identity 99.7 , evalue 1.36e-209 , alnlength 302 ,
      Bacteria , Proteobacteria , ACN95649.1
      3-oxoacyl-(acyl-carrier-protein) synthase III [Wolbachia
      sp. wRi]"
gene      complement(11131..12228)
      /locus_tag="wEsol_01707"
CDS      complement(11131..12228)
      /locus_tag="wEsol_01707"
      /codon_start=1
      /transl_table=11
      /fullproduct="qcoverage 100 , hcoverage 100 , similarity
      99.2 , identity 98.6 , evalue 9.77e-253 , alnlength 365 ,
      Bacteria , Proteobacteria , CDR79293.1 putative
      glycerol-3-phosphate acyltransferase PlsX,Phosphate
      acyltransferase,putative phosphate acyltransferase,Fatty
      acid/phospholipid biosynthesis enzyme,fatty
      acid/phospholipid synthesis protein PlsX,Fatty acid
      synthesis protein [Wolbachia endosymbiont of Drosophila
      simulans wAu]"
      /cog="PlsX COG0416 338 Fatty acid/phospholipid
      biosynthesis enzyme"
      /pfam="FA_synthesis"
      /tigr="TIGR00182 plsX 337 fatty acid/phospholipid
      synthesis protein PlsX"
      /product="putative glycerol-3-phosphate
      acyltransferase PlsX,Phosphate acyltransferase,putative
      phosphate acyltransferase,Fatty acid/phospholipid
      biosynthesis enzyme,fatty acid/phospholipid synthesis
      protein PlsX,Fatty acid synthesis protein"
      /translation="MAVTKENGFSNNRQSDYYDMLPTVNNNIVIALDAMGGDFAPLS
      VIHGAGFFLDNLVDPGIKVFVHHIYGDKEEVSPLLSKYKKVSNNSEFTHCSNDVLANDK
      PSFALRHRKDSSMKAIEAVKKGKAFGVVSSGNTGALMAISRFILGTLPNIRPAIAS
      ICPTKTKSFALLDLGANVDCNADSLFQFALMGSIKAKIALKIDNPEVALLNIGTEEVK
      GNDSVRGAFELLKNAPGINFKGYIEASEFLEGSIDVIVADGFVGNVMLKTAEATASTF
      INLIKQEVFNWIAKMLVGILLKSKLNKALTRFNPKIRSGAMFLGLNGIISKSHGNSD
      AISFAHAIKFAVNAISENLNQKIINGVSHIE"
      /besthit="qcoverage 100 , hcoverage 100 , similarity 99.2
      , identity 98.6 , evalue 9.77e-253 , alnlength 365 ,
      Bacteria , Proteobacteria , CDR79293.1 putative
      glycerol-3-phosphate acyltransferase PlsX,Phosphate
      acyltransferase,putative phosphate acyltransferase,Fatty
      acid/phospholipid biosynthesis enzyme,fatty
      acid/phospholipid synthesis protein PlsX,Fatty acid
      synthesis protein [Wolbachia endosymbiont of Drosophila
      simulans wAu]"
gene      complement(12179..12373)
      /locus_tag="wEsol_01708"
CDS      complement(12179..12373)
      /locus_tag="wEsol_01708"
      /codon_start=1
      /transl_table=11
      /fullproduct="qcoverage 100 , hcoverage 100 , similarity
      100 , identity 100 , evalue 1.40e-37 , alnlength 64 ,
      Bacteria , Proteobacteria , AGK00248.1 50S ribosomal
      protein L32 [Wolbachia endosymbiont of Drosophila
      simulans wHa]"
      /cog="RpmF COG0333 57 Ribosomal protein L32"
      /pfam="Ribosomal_L32p"

```

```

/tigr="TIGR01031 rpmF_bact 56 ribosomal protein L32"
/product="50S ribosomal protein L32"
/translation="MEEVLAVPKRKKSRSRRNMHRSHHAIEPKNIVVCSTTGEFMLPH
NVAVDGSYKGKRVFIKQQAE"
/besthit="qcoverage 100 , hcoverage 100 , similarity 100
, identity 100 , evalue 1.40e-37 , alnlength 64 ,
Bacteria , Proteobacteria , AGK00248.1 50S ribosomal
protein L32 [Wolbachia endosymbiont of Drosophila
simulans wHa]"
gene 12701..13483
/locus_tag="wEsol_01709"
CDS 12701..13483
/locus_tag="wEsol_01709"
/codon_start=1
/transl_table=11
/fullproduct="qcoverage 100 , hcoverage 100 , similarity
100 , identity 100 , evalue 3.23e-171 , alnlength 260 ,
Bacteria , Proteobacteria , WP_015589313.1 MULTISPECIES:
ABC transporter permease [unclassified Wolbachia]"
/cog="Ttg2B COG0767 267 ABC-type transport system
involved in resistance to organic solvents, permease
component"
/pfam="Permease"
/tigr="TIGR00056 TIGR00056 260 conserved hypothetical
protein"
/product="ABC transporter
permease"
/translation="MSFFDINSVRIIGRYFINFLRLGSAFFIFIQSLYHCLVPPYYF
SNIARQIIIEIGFFSLPIVGLTGVFIGAAIVLQSSLSDPLINQEQIIPKLVITITIKEL
GPVLISLIMVGKVGSSVAAEIGTMRITEQIDALTTLNINPFKYLIAPRILASIIVFPI
LTVCADLIGIFGGCITAVFEFNHNLNIYIKHTAQFFNTYDFITGLIKATVFGAIISVS
SCYYGYHCKEGARGVGVATTSTVVLSSILIILANYMITLIHA"
/besthit="qcoverage 100 , hcoverage 100 , similarity 100
, identity 100 , evalue 3.23e-171 , alnlength 260 ,
Bacteria , Proteobacteria , WP_015589313.1 MULTISPECIES:
ABC transporter permease [unclassified Wolbachia]"
gene 13476..14177
/locus_tag="wEsol_01710"
CDS 13476..14177
/locus_tag="wEsol_01710"
/codon_start=1
/transl_table=11
/fullproduct="qcoverage 100 , hcoverage 100 , similarity
100 , identity 100 , evalue 4.12e-156 , alnlength 233 ,
Bacteria , Proteobacteria , WP_006279859.1 MULTISPECIES:
ATP-binding cassette domain-containing protein
[Wolbachia]"
/cog="Ttg2A COG1127 263 ABC-type transport system
involved in resistance to organic solvents, ATPase
component"
/pfam="FtsK_SpoIIIE AAA_29 AAA_10 Pfam-B_3022 ABC_tran
AAA_21 SMC_N Pfam-B_16450 Pfam-B_15070"
/tigr="TIGR01186 proV 363 glycine betaine/L-proline
transport ATP binding subunit"
/product="ATP-binding
cassette domain-containing protein"
/translation="MRNPIISILNLSLSFDDRTVLKDLNFDILKGESLIVILGGSGSGK
SVLTKTIIGLLAPDSGSVKINSKSKNKFVLFQNSALFDYVTWENISFNYYKRFNIS
KKEAKQLAIEKLNVDVGLEESIADMFPIELSGGMKKRVALARAIHAHNPEIIILDEPTSG
LDPIMSDIVNEIIIKLSRDLNPTIITITHDIHSAFKIADKIAVLYEGEIISHGTVQEI

```

QNTNNEYIKKFIHYI"  
 /besthit="qcoverage 100 , hcoverage 100 , similarity 100  
 , identity 100 , evaluate 4.12e-156 , alnlength 233 ,  
 Bacteria , Proteobacteria , WP\_006279859.1 MULTISPECIES:  
 ATP-binding cassette domain-containing protein  
 [Wolbachia]"

gene 14490..14987  
 /locus\_tag="wEsol\_01711"

CDS 14490..14987  
 /locus\_tag="wEsol\_01711"  
 /codon\_start=1  
 /transl\_table=11  
 /fullproduct="qcoverage 100 , hcoverage 100 , similarity  
 100 , identity 100 , evaluate 4.60e-115 , alnlength 165 ,  
 Bacteria , Proteobacteria , WP\_007548965.1 MULTISPECIES:  
 hypothetical protein [Wolbachia]"  
 /translation="MSEAQGPNIAEWQAQQQHQAAGEKSGFGLGHSDSVSTVVDGMK  
 WLFNFHEGAIAAYSNVFEGLVSGSSLVTLFGKSGNMFGIKFLEGLAEYFSGGGGEDMP  
 SEGMDMAHGDDGHHSDDYPHANNEIAHNADGLQDMHDAGDHHGQSFSPGPSPSVGDDH  
 GHELG"  
 /product="hypothetical protein"  
 /besthit="qcoverage 100 , hcoverage 100 , similarity 100  
 , identity 100 , evaluate 4.60e-115 , alnlength 165 ,  
 Bacteria , Proteobacteria , WP\_007548965.1 MULTISPECIES:  
 hypothetical protein [Wolbachia]"

gene 15070..16233  
 /locus\_tag="wEsol\_01712"

CDS 15070..16233  
 /locus\_tag="wEsol\_01712"  
 /codon\_start=1  
 /transl\_table=11  
 /fullproduct="qcoverage 100 , hcoverage 100 , similarity  
 100 , identity 100 , evaluate 8.54e-265 , alnlength 387 ,  
 Bacteria , Proteobacteria , WP\_015589315.1 MULTISPECIES:  
 1-deoxy-D-xylulose-5-phosphate reductoisomerase  
 [unclassified Wolbachia]"  
 /cog="Dxr COG0743 385 1-deoxy-D-xylulose 5-phosphate  
 reductoisomerase"  
 /pfam="Semialdehyde\_dh DXP\_reductoisom DXP\_redisom\_C  
 DXPR\_C"  
 /tigr="TIGR00243 Dxr 389 1-deoxy-D-xylulose 5-phosphate  
 reductoisomerase"  
 /product="1-deoxy-D-xylulose-5-phosphate reductoisomerase"  
 /translation="MKKVSVLGSTGSGVGGKTVDLLSKRKEEYQVEALSAHSNFALLAH  
 QAKLLNAKYVAISDERLYKDLKENLLGTDVKIAIGATNIATIPVDLSVVAIVGIAGLE  
 PVMEVIESGTKVIALANKESIVCGGKLLLKKAKEKNVQIISIDSEHNAIFQILQNDK  
 CIEKIILTASGGPFLNYSSEQLRNVIVDQALSHPTWNMGKKISIDSATMMNKALEIE  
 AHNLFNISPDKIEAIVHPESIVHGIVTYKDGFNFAVLAETDMAIPISYALSWPERSAL  
 NRKLDLTKQGKLTFFQEPDHKRFPALKLSMAVLNSSAPQTNSIVLNAANEIAVNEFLKS  
 RIGFLKIVEVVESTMESFDSYTDINSLSDIINIDCESRIIAHKIVESKVVAYS"  
 /besthit="qcoverage 100 , hcoverage 100 , similarity 100  
 , identity 100 , evaluate 8.54e-265 , alnlength 387 ,  
 Bacteria , Proteobacteria , WP\_015589315.1 MULTISPECIES:  
 1-deoxy-D-xylulose-5-phosphate reductoisomerase  
 [unclassified Wolbachia]"

gene 1950..2022  
 /locus\_tag="wEsol\_tRNA-29"

tRNA 1950..2022  
 /locus\_tag="wEsol\_tRNA-29"

```

/ gene="tRNA-Lys"
/ intronpos="0..0"
/ program="tRNAscan-SE"
/ cove_score="78.8"
/ evidence=predicted
/ type="Lys"
/ anticodon=TTT
/ product="tRNA-Lys (TTT) "
gene      8174..8261
/ locus_tag="wEsol_tRNA-30"
tRNA      8174..8261
/ locus_tag="wEsol_tRNA-30"
/ gene="tRNA-Ser"
/ intronpos="0..0"
/ program="tRNAscan-SE"
/ cove_score="70.4"
/ evidence=predicted
/ type="Ser"
/ anticodon=TGA
/ product="tRNA-Ser (TGA) "
gene      complement(1550..1622)
/ locus_tag="wEsol_tRNA-31"
tRNA      complement(1550..1622)
/ locus_tag="wEsol_tRNA-31"
/ gene="tRNA-Ala"
/ intronpos="0..0"
/ program="tRNAscan-SE"
/ cove_score="66.7"
/ evidence=predicted
/ type="Ala"
/ anticodon=TGC
/ product="tRNA-Ala (TGC) "

```

# ORIGIN

```

1  cttttaatgc atcaataata gcttttagact gatccttact gccgagatca ccaatcacag
61  ctgtcacttt ctcataaggc agtttgtgaa tgatatcttt aagctcttct gcacccacgt
121 tatccaaaag ttccttaaag tgctcattag acatattgcg agcaaaagct tgaagttttt
181 ctgggttggt agctaaagac ttaatgataa tctggatcct attagaatca gttaaatcct
241 gagcaattat gccaaagtta tcatgatcaa gcttattaac taagtctttc agttggctct
301 ctgacagact atttactaaa gctttcaact gggtcaccttc taattcttta gaaagtattg
361 tcaagtgggtg ctcagccaag tcttttgcaa gcaactgtaa ttgttcgtca tttaaagttt
421 taataagtgc tttgaactga tccactttta agtgaggtaa aatttctttt acttgctctg
481 gatttaagtc tctaactaga gcttcaagct gagcatcatt taaaatagga acaattatth
541 gtaacttttc tggatttagt tcctgagcaa gagtttgtaa ttggtgattg gttagatgat
601 ccactaaagc ttggagttgt tcatctgtta agttctttgc taaggctctg agttggcttg
661 agctcagttc aggaattatt ttttgcagtt gctcgttact aagagtattg gtaagagttt
721 ttagttgggt gtctgttagg ccctgaataa aaactttggt aaacgtgctt gatagcaaca
781 gtagcacatc tcttatatgt ctctcacctg agtataacat aatgtcttgt aatacctcat
841 tgtcagggtga atcgattata tttcctgcct cgtctgaaaa ataataatth ttggtgccag
901 tatctgaatc ttcccatggt acatatttgt attccaattt ttttgattth atagaactgc
961 tacacatagt tttgaaaggc tgcacaagtt ctcttgata tgataactth gccaaactcat
1021 taccgtaata tacaaatgta tggttacttt ttacataatc taagttagaa tcaactttat
1081 aatctttggc taccagattt ccttcatttt cttcctccag acatatgtaa ctgtctaggc
1141 aagaactgcc gcaaagttht ataggtaata agcctagtgc tacatcgtht ttatcatcca
1201 gcgatacaag ctcaacttht ttaatagata ttgtaggac ataactthca ggccacttht
1261 tcaatttagt cggggthtth ctaaacacct cthttccagg taccatctth aaacatgct
1321 tthttccact cataggcgth accaataaat taattgttag tattctaaac tttattgatt
1381 aatttattgt taagttggta tatattacaa ttgtaataac caacattact tgtgtagaga
1441 aaagttacga aaagaaatag ggattthcag ggaagtagta taaaatctc atagattaaa
1501 ataagctgct ttgacaggtt ttgtggcggc tagagctaat atagactggt ggaggcaagc
1561 gggatcgaac cgctgacctt ctgctgcaa aacagatgct ctaccagctg agctataccc

```

|      |             |             |             |             |             |             |
|------|-------------|-------------|-------------|-------------|-------------|-------------|
| 1621 | ccaggtaatt  | cttgcttaaa  | gcataaatca  | ctcaggctga  | aatgcaagaa  | atattttatct |
| 1681 | gttaggctat  | tgctaaatag  | tgacaaaatt  | ctgcagttat  | gtacaattct  | ctatcttttt  |
| 1741 | gtcttctcag  | atttttacat  | cacactataa  | gctttgccaa  | atgaatctgt  | gaattgaaaa  |
| 1801 | ttaacaagaa  | gttttccttt  | aaaaattttt  | taactaaatt  | atcactaacg  | cagtatatta  |
| 1861 | tataatztat  | ttaaccacac  | atgaaaatft  | tagtttgatt  | aaaatggata  | aaaactgtat  |
| 1921 | tgatgtttag  | tatagctgaa  | aatgaaatg   | atcccgtagc  | tcagccggta  | gagcaactga  |
| 1981 | cttttaaatca | gtgggtcacg  | cgttcgaatc  | gcgtcgggat  | cactcacaaa  | ttttgaaaaa  |
| 2041 | catgctaaaa  | gaacaagaca  | aatatttcac  | caacctaaat  | ggtaaagaaa  | ctccactact  |
| 2101 | tgagggtgca  | aaaaaacgtg  | gtagctggca  | aaaaacaaag  | gagttactag  | atttaggatc  |
| 2161 | agaaaaaatc  | attgatgaag  | taaagaaatc  | tggtttgaga  | ggtcgaggag  | gtgcaggatt  |
| 2221 | ttctaccggc  | cttaagtgga  | gctttatgcc  | caaaaatctt  | ccaaaaaac   | aaccaacata  |
| 2281 | tttagtagtc  | aatgcagatg  | agtcagaacc  | tggtacatgt  | aaagatagag  | atataattgcy |
| 2341 | atatgagcca  | cataagttac  | ttgagggaat  | tctcctggcc  | ggcagagcga  | tcagcgcac   |
| 2401 | agttgcatat  | atttatatca  | ggggtgaatt  | ttataatgaa  | tatttagttc  | taaaaaaggc  |
| 2461 | acttgaggaa  | gcctataaag  | aaggtttaat  | tggaaaaaat  | gcctgcaaat  | caggctatga  |
| 2521 | tcttgatgtg  | tttatccata  | ggggtgcagg  | agcttacata  | tgtggagaag  | aaacagccca  |
| 2581 | acttgaatca  | attgaaggaa  | aaaagggtct  | tctcgcgatg  | aaacctccat  | ttcctgcagg  |
| 2641 | tgttggactt  | tttggtgcc   | caactacaat  | aaacaacgtt  | gaaactatag  | ccatggttcc  |
| 2701 | agatattctg  | aatcgcgag   | gagaatggtt  | tgcattctct  | ggtaaaccac  | ataatactgg  |
| 2761 | taccaaggct  | ttttgtatft  | cagggcacgt  | aaacaacccg  | tgtaatgttg  | aagaagagct  |
| 2821 | cggaattcca  | ttacgtgaat  | tgattgaaaa  | atacgcaggt  | ggagtgcgag  | ggggttgga   |
| 2881 | taattttact  | gctgtaatac  | ctgggtgggtc | ttcagtgcca  | ttaattccaa  | aatctatatg  |
| 2941 | cgatactatt  | gaaatggatt  | ttgattcatt  | aagaactgca  | caatcagggc  | ttggtactgc  |
| 3001 | tgctgtaata  | gtgatggata  | aatcaactga  | tataatagct  | gcaatagaga  | ggttatcaca  |
| 3061 | cttttatatg  | catgagtcct  | gtgggcaatg  | cacaccatgc  | cgtgaaggta  | ctggatggat  |
| 3121 | gtggaggatt  | atgaagagga  | tggtggcagg  | agatattaaa  | cctgatgaaa  | tagataagct  |
| 3181 | gcttgacctt  | acaactcaaa  | tagaaggaca  | tacaatttgc  | gcgcttggcg  | atgctgcagc  |
| 3241 | ttggccgatt  | caaggattaa  | taagacattt  | tcgccatgtt  | atcaaagaga  | gagcgatagt  |
| 3301 | ttaactctac  | ttatacttct  | taagccgtct  | tgctacttag  | caaccagagc  | taaaaaatat  |
| 3361 | tgattccctt  | cccttttagg  | tgctaattct  | acctttgcga  | tatcttcagt  | gtctctaatt  |
| 3421 | agccgttcta  | atttttccaa  | tccaacttca  | gtgtttataa  | gctctctgcc  | cttaaatctc  |
| 3481 | attgtaactt  | tgattttatg  | tccgtgggca  | agtaagtctc  | ttgcttgacg  | caattttggt  |
| 3541 | ccgtaatcgt  | gatcaccaat  | attgggaccc  | agtttaattt  | cttttatagt  | taatgttttt  |
| 3601 | tgtttctttt  | ttgcttcact  | tgctttcttt  | tttatatcat  | acttttggtt  | gctataatcc  |
| 3661 | agtattttac  | atactggagg  | agttgaatca  | ggtgcaattt  | ctaccaagtc  | taaaccaaca  |
| 3721 | ccctgtgcaa  | gttccaaaagc | tcgttctatt  | agcacgattc  | cgaccatttc  | accactgtga  |
| 3781 | tcaactaagc  | gtacctcctt  | agctgtgatg  | aatccattaa  | ttctgttttt  | attgttcttt  |
| 3841 | ttaacttgca  | aactttaact  | cccttaattc  | aaattaatac  | tttttaacag  | cgattcatta  |
| 3901 | gcctttttcca | aagaaaaaga  | ctcctgtctt  | tccgatccta  | aattttctcac | tgacacagtt  |
| 3961 | ttacttgtaa  | cttcattttt  | gcctacaatc  | cacaatatag  | gaaccttggt  | tagactatgc  |
| 4021 | aaacgtatct  | tataactaat  | tttttcattg  | gtcaaatcag  | tcttgactct  | cacacctgtg  |
| 4081 | tcttttaaga  | cattgctgat  | ttctgtggcg  | taaccgtcag  | cctcattttg  | aatggtcaga  |
| 4141 | atagcaagtt  | gcgttgagc   | aagccaaact  | ggaaattttc  | ctgcataatt  | ttctatcaaa  |
| 4201 | attccaataa  | aacgctcaaa  | agtcccaaga  | attgccctat  | gtagcataac  | agggtgatgc  |
| 4261 | ttgtgtccat  | ctgcccctat  | ataaaaagct  | cccagacgtt  | ctggtaaaat  | gaaatcaact  |
| 4321 | tgcaatgttc  | cacattgccca | gcttctgcct  | attgcatctt  | ttaaaaacaa  | ctctagcttt  |
| 4381 | ggaccataaa  | atgcaccttc  | accaggatta  | agttttataac | tcaageccgc  | ttctttaacg  |
| 4441 | gcttcaagca  | gcgctttttc  | agctctatcc  | catacttcat  | cattacctgc  | tctaatacct  |
| 4501 | ggacggtctg  | aaaatttcac  | agaaatttca  | ttgaacccaa  | gctctgaata  | tacttctttt  |
| 4561 | aaaaggtcac  | aaaactttat  | agtctcagaa  | ttcacttggt  | cttccataca  | aaaaatgtgt  |
| 4621 | gcatcgtctt  | gcgtaaaaacc | acgcactcgc  | atcagtccgt  | gcaatgagcc  | tgagctttca  |
| 4681 | tttctatggc  | atgtgccaaa  | ctctgccata  | cgtaattggt  | aatcacgata  | gcttctgggtg |
| 4741 | tgagaattaa  | aatctgcac   | atgacaagga  | caattcatgg  | gttttattgc  | tagctttttg  |
| 4801 | ctttcagatt  | catcaacaat  | aaacataatt  | tcacgaaact  | tatcccaatg  | tccagatttt  |
| 4861 | tcccacagct  | ctttgcttac  | taaaatagga  | gtttttacct  | caaaatagcc  | attatttatt  |
| 4921 | agcttctttc  | tgatgtaaga  | ctcaagaaca  | ttatatagaa  | tatatccttg  | ttcatgccaa  |
| 4981 | aaaacctgcc  | caacagcttc  | ctcttggtatg | tgaaataaat  | ccatatcctt  | ggcaattttg  |
| 5041 | cgggtgatcac | gtttctctgc  | ttcttttgaga | cactcaagat  | aagcgtttta  | ttcatcctta  |
| 5101 | tttctccatg  | ctgtgccata  | tattcgctgc  | aacattgggc  | cctttgcac   | acctcgccag  |
| 5161 | tatgcacccg  | ctactttcat  | aagtttaaac  | gctttaactc  | tgccggttga  | tggtgagtgc  |

|      |             |             |             |             |             |             |
|------|-------------|-------------|-------------|-------------|-------------|-------------|
| 5221 | ggaccacgac  | ataggtcaat  | aaaatcacct  | tgcctataaa  | cagttaggtt  | ttcaccctct  |
| 5281 | ggtatggatg  | agataaatatc | aaccttatat  | ttttcgctta  | taccactaaa  | gaaatcaatt  |
| 5341 | gcctgcttgc  | gagtccaaac  | ttctcgaaca  | aatctgtggt  | tacttttttac | aatctctttc  |
| 5401 | attttctttt  | ctattgcggt  | aagatcgctc  | gtagtgaagg  | tacgatctgt  | agcaaaatca  |
| 5461 | tagtaaaaac  | cgtcctgaat  | tgttggggccg | atagtaaatct | gagtattagg  | aaatagctct  |
| 5521 | ttcactgcct  | gcgccatcat  | atgagcagca  | tcatgcctta  | ttatatctaa  | acccgcttcg  |
| 5581 | tcactcagtt  | gtattacctc  | tatctctgta  | tcagattcaa  | tttcacgtga  | gagatcatat  |
| 5641 | aactcaccat  | ttactttcaa  | tgcaactgct  | tccttttaaaa | cattcggctg  | tagtatatca  |
| 5701 | aagccagtga  | ctttaccact  | gtattctttt  | actttttggt  | cggttgagaa  | agtaatccta  |
| 5761 | atcattttatc | gacccttttg  | tctaaccctc  | tctttgtcat  | cccagtgcgt  | gacactggga  |
| 5821 | tccatcttat  | ttttataatg  | gaaattagtt  | taacgtatgc  | tcctaaaatc  | tgttgtccat  |
| 5881 | tgcacaattt  | gcaaataattt | ttataacctg  | atcccagtgt  | caagcactgg  | gatgacacct  |
| 5941 | ttgtgtttga  | ggcaaaacag  | gccataacat  | ttaacatact  | gccctcgcaa  | acaaatgttc  |
| 6001 | gtacagttgt  | gtatcagcta  | cttgatgac   | accaccccta  | gtgggcactg  | cccctaaatc  |
| 6061 | ataatggata  | acagggttat  | aagctctgaa  | cattaataat  | aaggtctatt  | cttttttaac  |
| 6121 | ctgagtgcaa  | ttgcgtcttc  | ccaaatttca  | ccattacgca  | ataacttttc  | tttattgtac  |
| 6181 | attagctcct  | ctctcgtttc  | agtagcaaat  | tcaaagttag  | gaccctccac  | aattgcatca  |
| 6241 | actggacatg  | cctcttgga   | aagcccgag   | tatatgcatt  | ttgtcatgtc  | aatatcatag  |
| 6301 | cgtgtggtgc  | gacgactacc  | gtcttctctt  | tcctctgctt  | caataactat  | tgcttgagca  |
| 6361 | gggcagataa  | cttcgcataa  | tttacaagct  | atgcaccgtt  | cttcaccgtt  | tggataccta  |
| 6421 | cgcaacgcat  | gctcaccacg  | aaaccttgga  | cttaaagggc  | ctttctccat  | aggatatctt  |
| 6481 | aacgtaacct  | ttggtttgaa  | catatatctt  | aatgtaatag  | caaacccttt  | gattaactct  |
| 6541 | gcaaaagacc  | aataccaagc  | taatttcttg  | agcataaaaat | atttaaaact  | tgtgtcagtc  |
| 6601 | attataaatc  | atattatcag  | ttttcaaaaat | aaatatatttc | acctgggtga  | cttttacagc  |
| 6661 | ttttctatat  | aatacattca  | ctagtatgat  | agtactgcat  | taatataaac  | tagcaagata  |
| 6721 | gataaaaatt  | ttgaatat    | tcaaattagg  | tatttttggt  | tcttaagtgt  | aatattgcta  |
| 6781 | agtagtttat  | ataaataatg  | acaaacacaa  | atgaaactat  | tttcgctttg  | tcgaccgtat  |
| 6841 | ttggtaagtc  | aggagttgca  | gtaatcagaa  | tttcaggcaa  | ttacgcgctt  | aaagctttaa  |
| 6901 | atcattttca  | tattaagaaa  | gaaattaaac  | caagatttgc  | tacttttagt  | gatctatatg  |
| 6961 | atgatttcaa  | tcaattgata  | gataatggaa  | taatcatcta  | tttccctgct  | ccaaacagtt  |
| 7021 | tcactggcga  | gaatgttata  | gagttacaag  | tgcatggaag  | taaggcagtc  | ataaaaaatca |
| 7081 | tcttgaggga  | attatcaaaa  | attttcgtta  | tggccaggcc  | tggagaattc  | tcacttaggg  |
| 7141 | cttttctaaa  | tggtaaattt  | gacttaactc  | aaatagaagg  | aattgcagac  | ttaattgacg  |
| 7201 | ctgagacgaa  | aatgcaagct  | aaacaagcga  | ttaagcagat  | atcaggagaa  | ttggagagac  |
| 7261 | tatacagcaa  | ttggaggcaa  | agattgataa  | cgatacaatc  | caaaatcgaa  | gcataatatag |
| 7321 | actttccaga  | ggacatttgg  | gcagaaaaaa  | gtgagttgga  | aaaaattaat  | aatgaagtgc  |
| 7381 | aatctctcgt  | gcgattgata  | caagagcatt  | taaatgataa  | tagacggggc  | gaaaggttgc  |
| 7441 | gtgaggggtt  | acatatgtta  | ataactggta  | aaccaaaatgt | cggtaaatca  | actctgttta  |
| 7501 | atcttcttagc | caagcgtgat  | attgctattg  | tttctgaata  | tgagggcaca  | acaagagata  |
| 7561 | tacttgaagc  | tcatattgac  | attggcggat  | acccaatcat  | tctctctgat  | actgctggaa  |
| 7621 | ttcgtgagag  | ttcagatcca  | atagaatcag  | aagggtataag | tcgagcgaaa  | aagaggctct  |
| 7681 | ttgaagctga  | tttaagaata  | gaactatttc  | cttttgaaca  | gcgtcataat  | atcaattgca  |
| 7741 | acgttgtaaa  | tagcgatact  | atztatgtat  | tgagcaaagc  | tgacgatgtt  | atcaataatc  |
| 7801 | acaatataaa  | aattaatggc  | atagatcttt  | taccattttc  | tattctaaag  | gaaataggta  |
| 7861 | caaacaaatt  | gatctctctc  | ataaaagaga  | aggcagagga  | aaaatttggg  | catgatagag  |
| 7921 | acaccctgt   | aatcactcgg  | caaagacata  | ggaatcacat  | gaagaaagca  | ctggaacatt  |
| 7981 | tacaacgttt  | taatatcgat  | aatccaattg  | agttgatatc  | tgaagatttg  | aggcttgctg  |
| 8041 | catttgaact  | tgggtgcggtg | attggaatta  | ttgatgttga  | ggaaatattg  | agtagtgtgt  |
| 8101 | ttagcaactt  | ttgcgtgggc  | aagtaaaagct | tttatagatt  | gcttaaaaatc | aaatgttgtg  |
| 8161 | atagaaaaga  | aatggacgga  | tggccgagcg  | gtttaaggca  | ccagtcttga  | aaactgacgt  |
| 8221 | acgtgatgag  | cgtaccatgg  | gttcgaatcc  | cattccgtcc  | gcacagcatc  | tcgctatgct  |
| 8281 | agctgatttt  | tagagcttat  | ttggactatg  | tggttcataa  | cgctggaaat  | cttgtctaat  |
| 8341 | ctagccacat  | cttttaaaaa  | tacatccctt  | tgtaaattga  | ccttgtttagc | aaagaaagct  |
| 8401 | aatatctata  | aatagatcac  | catctgaata  | tgaaaaccga  | tatagtaata  | ataggtgcag  |
| 8461 | gacctgttgg  | aatattcact  | gcttttcaag  | cggaatgct   | tgatatgaaa  | tgtcatataa  |
| 8521 | tagatgtttt  | ggatcaagca  | ggaggacaat  | gcacagctct  | ttaccagaa   | aagccaatat  |
| 8581 | atgatatacc  | tggttatcct  | gtaattactg  | cccaaaaatt  | aattgagcag  | ctaattggagc |
| 8641 | aagcttcgcc  | atttaagcct  | atttaccatt  | taagtcaaaa  | agtagaaaag  | atttcgaata  |
| 8701 | actgcgatca  | aagcttttatt | atcataacta  | atacaggtac  | agaggtaaaa  | tgcaaaagccg |
| 8761 | ttattgtttgc | tgcaggtaac  | ggaatgtttg  | aacctaaccg  | tccgcccttg  | aatggtatat  |

|       |            |             |             |             |             |             |
|-------|------------|-------------|-------------|-------------|-------------|-------------|
| 8821  | tagaatatga | aaataaatct  | gtatTTTTaca | gtgtaaataa  | aatttctgat  | tttcaggata  |
| 8881  | aaactatagt | cattgcaggg  | gggggtgatt  | ctgcggctga  | ttggactgta  | gaacttttcta |
| 8941  | aagttgcgaa | gaaaatttat  | gtgatacata  | ggagaaagga  | atttcgctgc  | actcctgaaa  |
| 9001  | ctagaaataa | attagaatca  | cttgaaagtg  | atggaaagat  | agaactggta  | gtgccatattc |
| 9061  | aattacacga | actagcagga  | ggtaatgggc  | aattgagcac  | agtgatagta  | aaaaacattg  |
| 9121  | cctctaagga | agaaaaagaa  | atatccgctg  | atTTTTtgct  | gccatTTTT   | ggattgtcaa  |
| 9181  | tgaatcttgg | tccaataaac  | aattggggta  | tacagttaga  | acatagccgc  | atagttgtcg  |
| 9241  | accagctac  | acttaaaacc  | agtagagata  | ggatatatgc  | aatcggagat  | atagctatTT  |
| 9301  | attcaggcaa | actaaagtta  | atattaagtg  | gttttgctga  | gagtgccatg  | gcttgtcatg  |
| 9361  | acatatataa | agtaatccac  | aattctccag  | tcaatTTTca  | atactcgact  | tcgaagggaa  |
| 9421  | ttcacgggaa | agaaaaactt  | ccttgacaaa  | cctcgccagc  | tccttatca   | tgaaactgaa  |
| 9481  | gctattgtat | ttgctttcgc  | caatctgcag  | attaaaaggt  | aaggattact  | taatgtatcg  |
| 9541  | gcgtcttatg | ttcaatTTTT  | tgcagtatat  | agatactgta  | tgtctttaca  | aaacttcatc  |
| 9601  | tacatctaga | TTTTtatcta  | aataagctga  | acgcgcttac  | aaagcgttac  | aagacatcaa  |
| 9661  | aaaatgccaa | tactcgacag  | agatagtaaa  | agactagcta  | actcggggat  | tctttgtcct  |
| 9721  | TTTTtctgct | tagtaaattt  | cttaaacggt  | tgcagcgtaa  | gttagttgca  | attaaaagca  |
| 9781  | gcttaatctc | gcttgtcaag  | cgTTTaaaac  | ataaaaaacg  | ccaatatttt  | aaagcggata  |
| 9841  | ataacccag  | ggcttctttt  | gcTTTTTTTT  | tcattttggt  | aatttcttaa  | atatttgtgg  |
| 9901  | ctaaacgaca | accgtcatcc  | cgctgcttgt  | tagcgggatc  | tagagatacc  | gcgaatgaat  |
| 9961  | cgcggtatga | cgtaggactg  | ctgtcattcc  | agtgtctcct  | TTTTtgtcat  | ccgagtagct  |
| 10021 | gacactggga | tccaggaaac  | ttaaactttac | accaggtgaa  | tgtacaataa  | gaactggatt  |
| 10081 | ccagactgga | atgacaccga  | aggggctact  | gggatgacag  | gagaaagagg  | cactggaatg  |
| 10141 | acaaagaggg | tacttggaatg | acaggaggta  | atgcagggaag | tctaataagt  | cagcaacacg  |
| 10201 | gaaccccagg | tcaggcctgc  | acctattgaa  | atcagcagta  | ccagatttcc  | tgatttttatt |
| 10261 | tttgattcct | gtattgcata  | gtctaaggcc  | agtggaattg  | atgccgctga  | ggtgtttgca  |
| 10321 | tgcttatcaa | cggtattaat  | cactttctct  | ataggaaaat  | ctaatttctt  | tactactgct  |
| 10381 | tcaataatac | gaatgtttgc  | ttgatgggga  | attaaccagt  | caatatcagt  | gattttcaaa  |
| 10441 | ttattgcatt | tcagagtttc  | ctctactgag  | gctgttaact  | tatccactgc  | atgtttaaac  |
| 10501 | acttctcttc | cattcatgca  | tatTTTTcca  | gaatcaccag  | tagaggatac  | ccctccgttc  |
| 10561 | gtacatagta | tgtccacatt  | gccgtcagag  | tataagtttg  | ttgatatgat  | gccgcttcta  |
| 10621 | cccatttctg | atttcatcac  | cactgcacca  | gcaccatcac  | caaagagtac  | acaagttgac  |
| 10681 | ctatcttccc | aatcaacaat  | cctagacatt  | atttcagcac  | ctataaccaa  | tgcatattta  |
| 10741 | attctattgt | tagatTTTTat | gagcgaatca  | gcaactgtaa  | ctgcatatat  | aaaaccagag  |
| 10801 | catgctgctt | gtacatcaaa  | agcaaatgcg  | TTTTtacatt  | ttaaacttact | ttgtacaatc  |
| 10861 | gttgcacagc | taggaaaagt  | tttatcagga  | gttgttgtag  | caactataat  | caagtcaatt  |
| 10921 | tcactactg  | aaatttttagc | TTTTtctata  | gcactTTTTg  | ctgcattttac | agctagatct  |
| 10981 | gacgttagtt | ctccttcatc  | tgctatatgc  | ctttgaaacta | ttcctgtttct | ctgccttatc  |
| 11041 | cattcatcgc | tcgtctcaac  | tatcgatgca  | atttcgttgt  | tactcaacat  | TTTTcttgggt |
| 11101 | aggtaaagtc | cagtgccttaa | tatgaaactt  | ttattcaata  | tgactttacc  | cgttaattat  |
| 11161 | cttttgattt | aaattttcac  | taattgcatt  | tactgcaaat  | tttatggcat  | gggcaaaaaga |
| 11221 | aatagcatca | gaattttccat | gactttttaat | gatgatacca  | ttcagcccta  | aaaacatagc  |
| 11281 | tccacttcta | atTTTgggat  | taaaacgcgt  | taaagcttta  | tttagtttgg  | atTTTaacaa  |
| 11341 | tataccaaca | agcattttcgc | ctatccacga  | attgaatact  | tcctgcttta  | ttagattgat  |
| 11401 | aaaggtacta | gcggttgcct  | cagccgtttt  | gagcattaca  | ttgccaacaa  | aaccatcagc  |
| 11461 | aacaatcaca | tctatactac  | cctctaaaaa  | ttcacttgcc  | tctatatacc  | ctttgaaatt  |
| 11521 | aatgcctgga | gcgtTTTTta  | gcaactcaaa  | agcgccgcgc  | actgagtcac  | tacctttaac  |
| 11581 | ttcttctgtg | ccgatattta  | gcaaagcaac  | ttcaggattg  | tcaatTTTTa  | atgctatttt  |
| 11641 | tgcaaatata | ctacccatta  | acgcaaattg  | aaataatgag  | tcggcattac  | aatcaacatt  |
| 11701 | tgcaccaagg | tcaagcaaag  | cgaagctttt  | tgtcttagtt  | ggacagatag  | aggcaatagc  |
| 11761 | aggacgataa | atgttttggt  | atgttccctaa | aataaatctg  | gaaattgcc   | tcaatgctcc  |
| 11821 | ggtgttgcc  | gaagacacca  | ctccgaaagc  | tttacctttt  | tttactgcct  | caatggcagc  |
| 11881 | tttcatactt | gagtcttttac | gatgcctcag  | tgcaaaaagat | ggcttatcat  | ttgcaagaac  |
| 11941 | attgtcgaaa | caatgagtaa  | actcagaatt  | gttacttact  | TTTTtgtatt  | ttgaaagcaa  |
| 12001 | aggagatact | tcttctcttat | ctccataaat  | atgaaaaaaa  | actTTaatgc  | ctgggtcaac  |
| 12061 | aaggttgtct | aaaaaaaaaac | cagcaccatg  | aattacggaa  | agaggcgcaa  | aatcgccccc  |
| 12121 | catagcgtca | agtgcaataa  | ctatatattt  | attgaccgta  | ggtaacatat  | cataatagtc  |
| 12181 | actctgcctg | ttgcttgatg  | aaaaccgcgt  | ttcctttgta  | actgccatca  | actgctacgt  |
| 12241 | tatgaggcaa | catgaattcc  | ccagttgttg  | aacataaccac | aatattctta  | ggctcaatag  |
| 12301 | catgatgaga | acgatgcata  | ttacgccttg  | actttgactt  | TTTTcttttt  | ggaactgcc   |
| 12361 | aaacttcctc | cattctacta  | caaaattcaa  | ttcattagta  | acatgttttt  | tacaggaagt  |

|       |             |             |             |             |             |             |
|-------|-------------|-------------|-------------|-------------|-------------|-------------|
| 12421 | aaacaggggat | agtaaaataa  | gtaaggtttg  | cttatgtaat  | tgagttctat  | agctaaagt   |
| 12481 | gctctacaat  | ttgaaaaacc  | gtcattccgc  | tactcgtag   | cggaatctat  | accgcgaatg  |
| 12541 | aattgcggta  | tgacgtagg   | aaacctttct  | tgggttaagc  | tttaaattaa  | aacatcaagt  |
| 12601 | atattgaact  | taaaacatat  | ctcagctata  | ctttgcgata  | aagttaataa  | aaattttaat  |
| 12661 | aaaatcagta  | agactaacct  | ctagctaaaa  | tgaatacaaa  | gtgagctttt  | ttgatataaa  |
| 12721 | tagtggttaga | ataattggta  | ggtactttat  | caattttttg  | ttaaggcttg  | gtagtgcatt  |
| 12781 | catatttttt  | attcaatctc  | tataccactg  | ccttggtgcca | ccatattatt  | ttagcaacat  |
| 12841 | agcaagacaa  | attatagaga  | taggcttttt  | ctctctgcca  | attggtgggc  | tcactggagt  |
| 12901 | ttttatagga  | gcggaatag   | ttttacaaag  | tagcttgagt  | gacccattaa  | ttaccaaga   |
| 12961 | acagataata  | cccaaacttg  | ttacgatcac  | tatcattaaa  | gagttaggac  | cagttttgat  |
| 13021 | cagcttaata  | atggtaggaa  | agggttgatc  | atcagttgca  | gcagaaattg  | gtacaatgcg  |
| 13081 | catcaccgag  | caaatagatg  | cacttacaa   | cttgaacatc  | aaccctttta  | aataattta   |
| 13141 | tgcaccaagg  | attttagcgt  | caatcatagt  | atctcccata  | cttacagtat  | gtgcagattt  |
| 13201 | aataggaata  | tttgaggat   | gtatcactgc  | agtcttcgaa  | tttaaccaca  | atttaaatat  |
| 13261 | atacattaaa  | cacacagctc  | agttctttta  | tacgtatgat  | tttataactg  | ggctaataaa  |
| 13321 | agcaactgta  | tttggcgcca  | taatttctgt  | ctcaagctgc  | tattacggtt  | accattgcaa  |
| 13381 | agaagggtgca | cgaggagtag  | gtgttgctac  | aacatcaact  | gttgttttat  | cgtccatact  |
| 13441 | gatcattttt  | gcaaactaca  | tgattacttt  | gatacatgcg  | taaccccata  | atatcaatat  |
| 13501 | tgaacttaag  | cttatctttt  | gatgatagga  | cagtactaaa  | agatctaaat  | tttgatatat  |
| 13561 | taaaagggga  | atcattagtc  | atacttggtg  | gctcaggaag  | cggcaaactc  | gtattaacaa  |
| 13621 | aaacaattat  | cggcttgctt  | gctccagact  | cagggctctgt | taaaataaat  | agtaaaagca  |
| 13681 | aaaataaatt  | tgggggtttt  | tttcaaaatt  | ccgctttatt  | tgactacggt  | acagtgtggg  |
| 13741 | aaaatatatc  | ttttaattat  | aaaaagcgct  | ttaatatcag  | caaaaaagag  | gcaaaacagc  |
| 13801 | tagcaatcga  | gaagttaa    | gatgttgga   | tggaggaaag  | catagcagat  | atgtttccaa  |
| 13861 | tagagctatc  | aggtggaatg  | aaaaaaagag  | tggcacttgc  | aagggcgatt  | gcacacaatc  |
| 13921 | cagaaatcat  | tattttggat  | gaaccaactt  | caggattgga  | ccaattatg   | tcagatatag  |
| 13981 | taaacgagat  | aataataaaa  | ttatctagag  | atcttaacc   | tacaattatc  | acgattacac  |
| 14041 | atgatattca  | tagcgcattt  | aaaatagctg  | ataaaatagc  | agtattatat  | gaaggggaga  |
| 14101 | tcattttcca  | tgggaactgt  | caggaaatac  | aaaatactaa  | taacgaatat  | ataaaaaaat  |
| 14161 | tcattcatta  | tatatagcta  | aagatatata  | cactattgct  | aacagtcata  | tttttaagtt  |
| 14221 | ttaactttgt  | aaaaggtagt  | ggacattgga  | attcagattt  | ttttcaaact  | ggatcctata  |
| 14281 | gctaacacgt  | cataccgcga  | ttcattcgcg  | gtatctcggc  | atagattccg  | ctaactagta  |
| 14341 | gcggaatgac  | ggtttttcaa  | attgtcgtaa  | gtcagtttag  | ctatatatag  | gatgacagaa  |
| 14401 | attgtttgta  | ttagctatat  | tcaaaagctc  | tattgatatc  | ttgcaatatt  | tgtgataaaa  |
| 14461 | taatagctta  | aggttgagag  | taaaaaattt  | tgagtgaagc  | tcaagggtcca | aatattgcag  |
| 14521 | aatggcaagc  | gcagcagcaa  | caccaagagg  | ctgctggtga  | gaaaagtggt  | tttggctctg  |
| 14581 | gtcatagtga  | ctctgtttca  | acagtcgtgg  | atggaatgaa  | atggttggtc  | aactttcatg  |
| 14641 | aaggagcaat  | tgctgcttat  | agtaacgtgt  | ttgaaggttt  | ggtgagtggt  | agtagtctag  |
| 14701 | taacgctggt  | tggaaaaatca | ggtaatatgt  | ttggcataaa  | atctcttgaa  | ggccttgcatg |
| 14761 | aatatttttc  | agggtggaggt | ggggaagata  | tgccatcaga  | aggaatggat  | atggctcatg  |
| 14821 | gtgatgatgg  | acatcactca  | gatgattacc  | ctcatgccaa  | taacgaaata  | gctcataatg  |
| 14881 | ctgatggttt  | gcaagacatg  | catgatgcag  | gtgatcacca  | tggtcaatct  | ttttcacctg  |
| 14941 | gtccttcacc  | atctgttggc  | gatgaccacg  | gacatgaact  | tggttaaacc  | cttaaaaaact |
| 15001 | gctgaatagt  | atgcgagaag  | gcctaataag  | aaaagttgct  | gttgttataa  | ttaacatgag  |
| 15061 | tttgtcttag  | tgaaaaaggt  | ttcagtttta  | gggtcaacag  | gaagtgttgg  | aaaaaagact  |
| 15121 | gtagattttg  | tctcaaagag  | aaaagaagaa  | taccaagtgg  | aagcactaag  | tgcccatctg  |
| 15181 | aactttgctc  | tactggcaca  | ccaagcaaaa  | ctgctaaatg  | caaaatatgt  | tgctatctcc  |
| 15241 | gatgaaaggc  | tttacaaaaga | tttaaaaagaa | aatctacttg  | gtacagatgt  | aaaaatagca  |
| 15301 | attggtgcta  | caaataattgc | taccatacct  | gttgatctct  | cagttgttgc  | aatagttggc  |
| 15361 | attgcaggcc  | ttgagccagt  | tatggaggtt  | atagaaagcg  | gtaccaaagt  | cattgcattg  |
| 15421 | gcaaacaaag  | aaagcattgt  | ttgcggtgga  | aagttattac  | ttaaaaaagc  | taaagaaaaa  |
| 15481 | aacgtacaaa  | taatctctat  | tgactctgag  | cacaacgcaa  | tttttcaaat  | tttgcaaaat  |
| 15541 | gacgacaaat  | gcatagaaaa  | gatcatactt  | actgcttctg  | gtggaccatt  | cttaaatatt  |
| 15601 | agttctgagc  | aattaagaaa  | tgtcatagta  | gatcaggcgc  | ttagtcaccc  | cacttggaat  |
| 15661 | atgggaaaga  | aaatctcgat  | tgatagcgca  | acaatgatga  | ataaggcact  | agagataata  |
| 15721 | gaagcacata  | acttgtttaa  | catcagcccg  | gataaaaattg | aagcaatagt  | gcatcctgag  |
| 15781 | tcaatagtac  | atggaattgt  | aacttataag  | gatgggttca  | actttgctgt  | gcttgcatgag |
| 15841 | actgacatgg  | caattcccat  | ttcatatgct  | ttgtcttggc  | cggaaagatc  | agctttaaat  |
| 15901 | cgtaaattag  | atttaacaaa  | gcaaggaaaa  | ttgacctttc  | aagaaccaga  | ccataagcgt  |
| 15961 | tttcctgcgc  | taaagcttag  | catggcagtg  | ttaactctt   | ctgctccaca  | aacaaacagt  |

```

16021 attgtgctca atgctgcaaa tgaaatagct gttaatgaat ttttgaagtc acgaatcggc
16081 tttttaaaaa tagtagaagt agtggaatca acaatggaaa gttttgatag ttatactgat
16141 attaattcac tatctgatat aataaatatt gattgtgaaa gtcgtattat tgctcacaaa
16201 attgttgaaa gttaaagttgt tgcgtatagc tagagtaatg taaccagact gcattctgtg
16261 attttttttt agcaaagcac gatacacaat cgtcattccg ctt

```

//

```

LOCUS      JAQZAU010000153          9600 bp    dna        linear    ENV 17-MAR-2023
DEFINITION MAG: Wolbachia pipientis isolate wEsol contig_29885, whole genome
            shotgun sequence.
ACCESSION  JAQZAU010000153  JAQZAU010000000
VERSION    JAQZAU010000153.1
DBLINK     BioProject: PRJNA929258
            BioSample: SAMN33142973
KEYWORDS   WGS; ENV; Metagenome Assembled Genome; MAG.
SOURCE     Wolbachia pipientis (insect metagenome)
ORGANISM   Wolbachia pipientis
            Bacteria; Pseudomonadota; Alphaproteobacteria; Rickettsiales;
            Anaplasmataceae; Wolbachieae; Wolbachia.
REFERENCE  1  (bases 1 to 9600)
AUTHORS    Fiutek,N., Couger,B.M., Roy,S., de la Torre,J.R. and Connor,E.F.
TITLE      Genomic assessment of the contribution of the Wolbachia
            endosymbiont of Eurosta solidaginis to gall-induction
JOURNAL    International Journal Molecular Sciences
REFERENCE  2  (bases 1 to 9600)
AUTHORS    Fiutek,N., Couger,B.M., Roy,S., de la Torre,J.R. and Connor,E.F.
TITLE      Direct Submission
JOURNAL    Submitted (10-FEB-2023) Biology, San Francisco State University,
            1600 Holloway Ave, San Francisco, CA 94132, USA
COMMENT    ##Genome-Assembly-Data-START##
            Assembly Date      :: JUN-2019
            Assembly Method    :: FLYE v. 06-2019
            Genome Representation :: Full
            Expected Final Version :: Yes
            Genome Coverage    :: 100.0x
            Sequencing Technology :: Illumina HiSeq; PacBio Sequel
            ##Genome-Assembly-Data-END##
FEATURES   Location/Qualifiers
            source              1..9600
                                /organism="Wolbachia pipientis"
                                /mol_type="genomic DNA"
                                /submitter_seqid="contig_29885"
                                /isolate="wEsol"
                                /isolation_source="galls on Solidago altissima"
                                /host="Eurosta solidaginis MN-2018-EFC"
                                /db_xref="taxon:955"
                                /environmental_sample
                                /country="USA: Cowling Arboretum, Carleton College,
                                Northfield, MN"
                                /lat_lon="44.48 N 93.13 W"
                                /altitude="280 m"
                                /collection_date="2018-11"
                                /metagenome_source="insect metagenome"
                                /note="metagenomic"
            gene                complement(<1..1088)
                                /locus_tag="wEsol_01713"
            CDS                 complement(<1..1088)
                                /locus_tag="wEsol_01713"
                                /codon_start=1
                                /transl_table=11
                                /fullproduct="qcoverage 100 , hcoverage 87.43961352657 ,

```

```

similarity 100 , identity 99.7 , evalue 3.65e-266 ,
alnlength 362 , Bacteria , Proteobacteria ,
WP_213863502.1 hypothetical protein [Wolbachia
endosymbiont of Ceratitidis capitata]"
/translation="MDYKNVQKILLTSIKKDDPYKGFKELEIKRYCIAQTLLRGWDR
TIIPPFLKKILEDEACWQIPIGDTSQVRLNRYTVGRKLLALKTEDGQKSLDSFDRY
RIACWCCFEDEVRAIFEEFKLTGSKPVESLVKGCDKGPLMIYWSHAMNNQEHQLELN
NDHLYVYAFKCAMLEKHVEALEFFWSKLQSIDCVSPKRKEDLLMEVAYNKGRFSTDDV
GMVDFCLRHLDPNRYHELLKRDFKQHGCIYTLILRRNHSFENARKLFEHLKPEDLSS
EAYSTSMFSALNSLVSTSDDNFIKSGSDMLTSMWNRPGFESHKQHYLNKLSEQLSATR
DLVASLIKENKAVKILSEIVNSLSQEQI"
/product="hypothetical protein"
/besthit="qcoverage 100 , hcoverage 87.43961352657 ,
similarity 100 , identity 99.7 , evalue 3.65e-266 ,
alnlength 362 , Bacteria , Proteobacteria ,
WP_213863502.1 hypothetical protein [Wolbachia
endosymbiont of Ceratitidis capitata]"
gene complement(1597..1908)
/locus_tag="wEsol_01714"
CDS complement(1597..1908)
/locus_tag="wEsol_01714"
/codon_start=1
/transl_table=11
/fullproduct="qcoverage 100 , hcoverage 100 , similarity
100 , identity 100 , evalue 1.60e-74 , alnlength 103 ,
Bacteria , Proteobacteria , WP_155968470.1 transposase
[Wolbachia pipientis]"
/cog="COG3335 COG3335 132 Transposase and inactivated
derivatives"
/pfam="DDE_3 DDE_1"
/product="transposase"
/translation="MTFKGGCDKEVFNTWLEKMLLPKLPHGTTIVMDNATFHKTPKTK
ELIDNARCRLLYLPTYSPDLNPIEHCWNTIKSRLRPLMHKYTDLQLLVGNTIMEIYHS
F"
/besthit="qcoverage 100 , hcoverage 100 , similarity 100
, identity 100 , evalue 1.60e-74 , alnlength 103 ,
Bacteria , Proteobacteria , WP_155968470.1 transposase
[Wolbachia pipientis]"
gene complement(2108..2455)
/locus_tag="wEsol_01715"
CDS complement(2108..2455)
/locus_tag="wEsol_01715"
/codon_start=1
/transl_table=11
/fullproduct="qcoverage 100 , hcoverage 100 , similarity
100 , identity 100 , evalue 2.74e-74 , alnlength 115 ,
Bacteria;Eukaryota , Proteobacteria;Arthropoda ,
WP_155968342.1 MULTISPECIES: IS630 transposase-related
protein [Wolbachia]"
/cog="COG3415 COG3415 138 Transposase and inactivated
derivatives"
/pfam="HTH_Tnp_IS630 HTH_Tnp_1 HTH_23 HTH_28 HTH_29 HTH_7
CENP-B_N Pfam-B_14738 HTH_8 HTH_17 HTH_24 Pfam-B_2106"
/product="IS630
transposase-related protein"
/translation="MAYSVDLRERAVSMIEKGKSKVEVAELLEIGIATLYRWLRKKAA
GESLRPSKNGSFIRKIDPKILEEYVKKNPDHTLAEMKQNLGFGINSIWYRLKQLRITL
KKSYSYISRAQSRR"
/besthit="qcoverage 100 , hcoverage 100 , similarity 100
, identity 100 , evalue 2.74e-74 , alnlength 115 ,

```

Bacteria;Eukaryota , Proteobacteria;Arthropoda ,  
 WP\_155968342.1 MULTISPECIES: IS630 transposase-related  
 protein [Wolbachia]"  
 gene complement(2534..2875)  
 /locus\_tag="wEsol\_01716"  
 CDS complement(2534..2875)  
 /locus\_tag="wEsol\_01716"  
 /codon\_start=1  
 /transl\_table=11  
 /fullproduct="qcoverage 100 , hcoverage 100 , similarity  
 100 , identity 100 , evalue 1.53e-79 , alnlength 113 ,  
 Bacteria , Proteobacteria , AAS13810.1 transposase, IS5  
 family, OrfB [Wolbachia endosymbiont of Drosophila  
 melanogaster]"  
 /cog="COG3293 COG3293 124 Transposase and inactivated  
 derivatives"  
 /pfam="DDE\_Tnp\_1\_2 DDE\_Tnp\_1"  
 /product="transposase, IS5 family, OrfB"  
 /translation="MRTKYTKVKMWADMGYQGRNLKNHIKEEYDIDIEIVKRPPCRF  
 WVHKDTPPELLPTREQGFKVQPRRWVVERTFAWVNRNRRLSKEYDLLTTSTENFIYLA  
 MSRVMLKREYA"  
 /besthit="qcoverage 100 , hcoverage 100 , similarity 100  
 , identity 100 , evalue 1.53e-79 , alnlength 113 ,  
 Bacteria , Proteobacteria , AAS13810.1 transposase, IS5  
 family, OrfB [Wolbachia endosymbiont of Drosophila  
 melanogaster]"  
 gene complement(2986..3366)  
 /locus\_tag="wEsol\_01717"  
 CDS complement(2986..3366)  
 /locus\_tag="wEsol\_01717"  
 /codon\_start=1  
 /transl\_table=11  
 /fullproduct="qcoverage 100 , hcoverage 100 , similarity  
 100 , identity 100 , evalue 1.16e-87 , alnlength 126 ,  
 Bacteria , Proteobacteria , AOV87106.1 transposase  
 [Wolbachia endosymbiont of Drosophila incompta]"  
 /cog="COG3293 COG3293 124 Transposase and inactivated  
 derivatives"  
 /pfam="DUF4096"  
 /product="transposase"  
 /translation="MRKKYPTDLSEREWARIEKHFRVSYKKGGRPPKYSKREILEAIF  
 YVLRGTCQWRYLPNDFPLWKTVYEQFRQWKKQGIFEKMNYEITKYSRRKIGRNEQPSA  
 CIVDSQSVKTTEKGGSKAMMEVKK"  
 /besthit="qcoverage 100 , hcoverage 100 , similarity 100  
 , identity 100 , evalue 1.16e-87 , alnlength 126 ,  
 Bacteria , Proteobacteria , AOV87106.1 transposase  
 [Wolbachia endosymbiont of Drosophila incompta]"  
 gene complement(3394..4509)  
 /locus\_tag="wEsol\_01718"  
 CDS complement(3394..4509)  
 /locus\_tag="wEsol\_01718"  
 /codon\_start=1  
 /transl\_table=11  
 /product="hypothetical protein"  
 /pfam="PhageMin\_Tail"  
 /translation="MSMLSIKIGAALDGSFNSAMIGSTAKLSKLGDSIRQLDSSMKSV  
 SKFKQLNHDALKAMKNWKEAEKKAKESAAAIKEKKEKKEPSKALKNEFEKLKASASK  
 AKEAYIKKRDALHTLNEEVRKSGKDIKSLVRDQTKLGSSIEVLKGKYSKLGSVIQKQQ  
 NALAKKAHYRSQVMETIGLGLSLAAPIKVAIDFESAMADVKKVVRFAEDDAAHNQGA  
 VEFQQLKELSRITPLSAAELAQIAASGGQLGIKKEKLLSFTETVAKMSTAFDMSAEEA

GDSIAKLANVYGIEVEGMERVGNIINHLSDNSAAKEGDMVKALAIVGGSQFGLDIK  
 ETSSSLVNAFISLGKQPAKAATAINALLRGCPEISKRL"  
 /cog="COG5283 COG5283 1213 Phage-related tail protein"  
 /besthit="qcoverage 97.3045822102426 , hcoverage  
 46.7616580310881 , similarity 97.8 , identity 96.4 ,  
 evalule 8.15e-146 , alnlength 361 , Bacteria ,  
 Proteobacteria , MBV2145837.1 phage tail tape measure  
 protein [Wolbachia endosymbiont of Pissodes strobil]"  
 gene complement(4625..4879)  
 /locus\_tag="wEsol\_01719"  
 CDS complement(4625..4879)  
 /locus\_tag="wEsol\_01719"  
 /codon\_start=1  
 /transl\_table=11  
 /pfam="FluMu\_gp41"  
 /fullproduct="qcoverage 100 , hcoverage 100 , similarity  
 100 , identity 100 , evalule 3.02e-50 , alnlength 84 ,  
 Bacteria , Proteobacteria , WP\_155969105.1 phage tail  
 assembly protein [Wolbachia pipientis]"  
 /translation="MTTVKLDNPITVDGISVSELPMPREPTVGDLLAIECVEGEARKEV  
 ALAANLTSMPREVIEKLLIKDYVKIQKVLRLDFLSPLEQRT"  
 /product="phage tail assembly protein"  
 /besthit="qcoverage 100 , hcoverage 100 , similarity 100  
 , identity 100 , evalule 3.02e-50 , alnlength 84 ,  
 Bacteria , Proteobacteria , WP\_155969105.1 phage tail  
 assembly protein [Wolbachia pipientis]"  
 gene complement(5020..5310)  
 /locus\_tag="wEsol\_01720"  
 CDS complement(5020..5310)  
 /locus\_tag="wEsol\_01720"  
 /codon\_start=1  
 /transl\_table=11  
 /fullproduct="qcoverage 100 , hcoverage 100 , similarity  
 100 , identity 100 , evalule 4.45e-62 , alnlength 96 ,  
 Bacteria , Proteobacteria , WP\_155969103.1 type II  
 toxin-antitoxin system RelE/ParE family toxin [Wolbachia  
 pipientis]"  
 /cog="RelE COG2026 90 Cytotoxic translational repressor  
 of toxin-antitoxin stability system"  
 /pfam="Plasmid\_stabil"  
 /product="type II toxin-antitoxin system  
 RelE/ParE family toxin"  
 /translation="MGYTIIIFLDNVLEKDLPSLPKTVRKRVIKAINERLTVDPINLGK  
 ALDHSLKGYKGLRVGDYRVLYYAETLKYEVTVTIGHRDTIYKKAKKILNIH"  
 /besthit="qcoverage 100 , hcoverage 100 , similarity 100  
 , identity 100 , evalule 4.45e-62 , alnlength 96 ,  
 Bacteria , Proteobacteria , WP\_155969103.1 type II  
 toxin-antitoxin system RelE/ParE family toxin [Wolbachia  
 pipientis]"  
 gene complement(5286..5522)  
 /locus\_tag="wEsol\_01721"  
 CDS complement(5286..5522)  
 /locus\_tag="wEsol\_01721"  
 /codon\_start=1  
 /transl\_table=11  
 /pfam="Pfam-B\_2729 Pfam-B\_964"  
 /fullproduct="qcoverage 100 , hcoverage 100 , similarity  
 100 , identity 100 , evalule 2.61e-28 , alnlength 78 ,  
 Bacteria , Proteobacteria , WP\_155969101.1 hypothetical  
 protein [Wolbachia pipientis]"

```

/translation="MANLGTNVALSKETSQHLAELAKLTKQPAQELAERLIREAVELE
EEDIFLSA VADEYDIEGAKKTKSEDVDWDTLLSS"
/product="hypothetical protein"
/besthit="qcoverage 100 , hcoverage 100 , similarity 100
, identity 100 , evalue 2.61e-28 , alnlength 78 ,
Bacteria , Proteobacteria , WP_155969101.1 hypothetical
protein [Wolbachia pipientis]"
gene 5699..6079
/locus_tag="wEsol_01722"
CDS 5699..6079
/locus_tag="wEsol_01722"
/codon_start=1
/transl_table=11
/fullproduct="qcoverage 100 , hcoverage 100 , similarity
100 , identity 100 , evalue 1.16e-87 , alnlength 126 ,
Bacteria , Proteobacteria , AOV87106.1 transposase
[Wolbachia endosymbiont of Drosophila incompta]"
/cog="COG3293 COG3293 124 Transposase and inactivated
derivatives"
/pfam="DUF4096"
/product="transposase"
/translation="MRKKYPTDLSEREWARIEKHFRVSYKKGGRPPKYSKREILEAIF
YVLRGTGCQWRYLPNDFPLWKTVYEQFRQWKKQGIFEKMNIEITKYSRRKIGRNEQPSA
CIVDSQSVKTTEKGGSKAMMEVKK"
/besthit="qcoverage 100 , hcoverage 100 , similarity 100
, identity 100 , evalue 1.16e-87 , alnlength 126 ,
Bacteria , Proteobacteria , AOV87106.1 transposase
[Wolbachia endosymbiont of Drosophila incompta]"
gene 6190..6531
/locus_tag="wEsol_01723"
CDS 6190..6531
/locus_tag="wEsol_01723"
/codon_start=1
/transl_table=11
/fullproduct="qcoverage 100 , hcoverage 100 , similarity
100 , identity 100 , evalue 1.53e-79 , alnlength 113 ,
Bacteria , Proteobacteria , AAS13810.1 transposase, IS5
family, OrfB [Wolbachia endosymbiont of Drosophila
melanogaster]"
/cog="COG3293 COG3293 124 Transposase and inactivated
derivatives"
/pfam="DDE_Tnp_1_2 DDE_Tnp_1"
/product="transposase, IS5 family, OrfB"
/translation="MRTKYTKVKMWADMGYQGRNLKNHIKEEYDIDIEIVKRPPCRF
WVHKDTPPELLPTREQGFKVQPRRWVVERTFAWVNRNRRLSKEYDLLTTSTENFIYLA
MSRVMLKREYA"
/besthit="qcoverage 100 , hcoverage 100 , similarity 100
, identity 100 , evalue 1.53e-79 , alnlength 113 ,
Bacteria , Proteobacteria , AAS13810.1 transposase, IS5
family, OrfB [Wolbachia endosymbiont of Drosophila
melanogaster]"
gene 6528..7088
/locus_tag="wEsol_01724"
CDS 6528..7088
/locus_tag="wEsol_01724"
/codon_start=1
/transl_table=11
/pfam="Ank_4 Ank_2 Ank_5 Ank_3 Ank Ank_4 Pfam-B_2980
H_PPase"
/fullproduct="qcoverage 85.4838709677419 , hcoverage 100

```

, similarity 98.7 , identity 98.1 , evalue 9.73e-103 ,  
alnlength 159 , Bacteria , Proteobacteria ,  
WP\_208571660.1 hypothetical protein [Wolbachia  
pipientis]"  
/translation="MNLLVSGQPLNVVSEKNGDTPHESARMNRYDIVEYLVVEEEKAT  
IDVKNFRGETPSDLADSNKYKDIVKYLRLVRECPKTSGLADDNVIQYQKV TENKH  
LTITNRAIKTSFCVGIMTMLTSVAIGCTAIHLSLSISATAALIVGAIAGGITYAVLKP  
NSRLNECEVNRQSLPQMPKDECCMSY"  
/product="hypothetical protein"  
/besthit="qcoverage 85.4838709677419 , hcoverage 100 ,  
similarity 98.7 , identity 98.1 , evalue 9.73e-103 ,  
alnlength 159 , Bacteria , Proteobacteria ,  
WP\_208571660.1 hypothetical protein [Wolbachia  
pipientis]"  
gene 7151..9592  
/locus\_tag="wEsol\_01725"  
CDS 7151..9592  
/locus\_tag="wEsol\_01725"  
/codon\_start=1  
/transl\_table=11  
/pfam="Ank\_2 Pfam-B\_10896 Ank\_5 Ank Ank\_4 Ank\_3 Ank\_5  
Ank\_4 Ank Ank\_3 DUF3447 Ank\_2 Ank\_5 Ank Ank\_3 Ank\_4 Ank\_2  
Ank\_2 Ank\_4 Ank\_5 Ank Ank\_3 Pfam-B\_5362"  
/fullproduct="qcoverage 100 , hcoverage 96.7857142857143  
, similarity 100 , identity 100 , evalue 0.0 , alnlength  
813 , Bacteria , Proteobacteria , WP\_213863485.1 ankyrin  
repeat domain-containing protein [Wolbachia endosymbiont  
of Ceratitidis capitata]"  
/translation="MELNKLQEV LNSANADVGFSSKNVVS KIEERSKQVDPGTFCQLH  
LAVLKNNKQMVEALIKGGADVNTIDAYS RDPLY YAILQGNTRMVEILIKNGASVNKKY  
NDGSTPLHHAVLSQKIKIVEY LINNGADV NALDEKRRTPLYLAGRSTQMVSILMKKGA  
FPLLENRDIEFLKDLVKRIKDDDT EYLKEVKVEQKEGRVDDKYESIKYSLLS DNSSL  
TSIIKRKKFKNLISDWSFNVPDLKDNQKNLNKALLNLLTDFPFCDITRFEDFLHDNKG  
DDLKAVLNLRGESKLTILHVIQGM EYLAVEKDIGCAVSTFM TLLLKSGADPNIVNSE  
GQTPLHYAAYNTLNIP LLLKKGARGQTDRQGKTPLDIVI INKKPF EVNLLEQIFLTQ  
EQLEAKNDLEGICGHSFNTNRLRKFFNQHKGNEGLKEILNLRDCEGKSRVFQKIREAC  
YGNETHFKEAKLLLEAG AIDYEEWKDKRLPKLRTLWDDLILDQSEKLKIFLGRV NK  
SKDIDELKRVVNEAIELGVRLNFPNQGSIYGVYEKEYSFTDFVIRKISELRKSSEGS  
RNIEVASGIVCQLISKGAILYNISS IYVIDEEFESHKANMK NAYADYENRALDFIT  
IVQSATSGKVRDV KIDNSTLCLEYSQDSKVDVAKITNGARGLGITQEGVQYGRNIIKI  
GKSEVEIITENAIRNYVGLADGSNIVLTFDTGLGELEVR LYPDKQNLIKVEVEDQEKW  
KKLQNC EERIG EKCLLGCSVRDAIERGFFTRSGELIRSETISQSDATKVG PWAKREK  
MRKASSLEETVGHSL"  
/product="ankyrin repeat domain-containing  
protein"  
/besthit="qcoverage 100 , hcoverage 96.7857142857143 ,  
similarity 100 , identity 100 , evalue 0.0 , alnlength  
813 , Bacteria , Proteobacteria , WP\_213863485.1 ankyrin  
repeat domain-containing protein [Wolbachia endosymbiont  
of Ceratitidis capitata]"

# ORIGIN

```

1  ttgatttgct cttggctaag ggagttaaca atttcagata atattttaac agctttat
61  tccttaataa gagaagcaac caaatctctg gttgctgaga gttgttcgct tagcttat
121  aatagtggtt gtttatgaga ctcaaagcca ggacgattcc acatagaggt gagcatgtca
181  ctaccagatt tgataaaatt atcatctgat gtagaaacaa gcgagttaa tgctgaaaac
241  attgatgtac tataagcttc agaagataaa tcttctggct ttaaagtgtc aaatagcttt
301  ctggcgttct cgaaagaatg gtttcttctt aatatactta agtataata acatccatgt
361  tgtttaaaat ctctttttta taattcatga tatctgttag gatcaagatg acgtaggcaa
421  aatcaacca taccaacatc atcagtagaa aaacgtcctt tattatatgc tacttccatt
481  aataaatctt ctttcctttt tggagataca caatcaatcg actgtaactt actccaaaag

```

|      |             |             |            |             |             |             |
|------|-------------|-------------|------------|-------------|-------------|-------------|
| 541  | aatttctaaag | cttcaacatg  | cttttctagc | attgcacatt  | taaaagcgta  | aacgtataga  |
| 601  | tgatcattat  | ttagtttctaa | ctgatgttcc | tgattattca  | tagcatgtga  | ccagtaaadc  |
| 661  | attaaaggcc  | ctttatcaca  | tcccttaact | aaactctcta  | ctgggtttact | acctaagtgt  |
| 721  | aattttaaatt | cctcaaaaat  | agctcttacc | tcgtcctcaa  | aacaacacca  | gcaggcaatt  |
| 781  | ctgtagcggg  | caaaggaatc  | aagaagagat | ttctgtccat  | cttcagtttt  | taaagctaata |
| 841  | aatttttctcc | ccacagtata  | cctgttgagc | ctaacctgat  | ctgaagtatc  | tcctattgggt |
| 901  | atgtgccaac  | aagcttcatc  | ctctaaaatc | ttcttaagaa  | aaggcggtat  | tattgttctg  |
| 961  | tcccatccac  | gcaataatgt  | ctgatatgca | atacaatacc  | tcttaatctc  | taactcttta  |
| 1021 | aaccctttat  | aaggatcatc  | ttttttaatg | gaagtaagta  | atatcttttg  | tacatttttg  |
| 1081 | taatccataa  | tgccctctat  | ctaacaagat | ttaataatact | ttaagtatgc  | tgctctacct  |
| 1141 | ttaaaaacttt | gtcaattact  | attttagaaa | aatttttctaa | cccaaagtag  | ttttaggcaa  |
| 1201 | taagaaaatc  | aatattaatc  | tagcaatata | ttttactaaa  | aaatttaata  | aaataacccat |
| 1261 | ttccagcaac  | caaaaccagc  | atacgtgaga | agaagttttt  | ttgggatgga  | ttggactacc  |
| 1321 | acgtgtaccg  | ttcgaacttt  | tctttataat | aattttacca  | tatcacaaaa  | ccagccatat  |
| 1381 | taggctactt  | ttgtcttatt  | tacatatgaa | ttaagttgct  | tagcttttatt | gcaacaattt  |
| 1441 | tgtgttctta  | ttttcacaa   | cctattttta | cgcaacgtgt  | tctcacaaat  | atacgtactt  |
| 1501 | ttttacattt  | ttgaagagag  | tcaacaatta | aaacttttgt  | gacactaatt  | ggtttacggt  |
| 1561 | tctgctaaaa  | atattttttc  | aaaagtatat | tatttttctaa | aatgaatgat  | aaatttccat  |
| 1621 | tatgggtatta | ccaaccaaaa  | gttgtaagtc | tgtatattta  | tgcatataag  | gtctgaggcg  |
| 1681 | gcttttgatg  | gtattccaac  | aatgctctat | aggggttcaa  | tctgggtgaat | atgttggtag  |
| 1741 | atagagcaaa  | cggcatctag  | cattatctat | taactccttt  | gttttgggag  | ttttatggaa  |
| 1801 | tgtggcattg  | tccataacta  | ttgtagtacc | atgtggcaat  | ttaggtaata  | acatcttctc  |
| 1861 | taaccatgta  | ttgaatacct  | ctttgtcaca | cccacctttg  | aaagtcattg  | gtgcaataaa  |
| 1921 | tctctttcca  | atccaccgcg  | ctattatact | gattctctct  | cgttttcttc  | ctggaataatc |
| 1981 | tgcataaatt  | ttctttccta  | ttggagcacg | tccatactct  | cggtataacc  | tattatcaac  |
| 2041 | tcctgcttca  | tctatatata  | agatgctgga | atgggtctatt | tttgagattt  | tatcggtaaa  |
| 2101 | tcgctgccta  | tcttcttgat  | tgcgctcttg | atatagtgtg  | actttttttt  | aaagtaattc  |
| 2161 | ttagctgttt  | cagcctatac  | caaattgaat | ttattccaaa  | tccaagattt  | tgtttcatct  |
| 2221 | ctgccagcgt  | atgatctgga  | ttctttttta | catattcttc  | gagtattttt  | gggtctattt  |
| 2281 | ttcgaataaa  | gctgccggtt  | ttcgatggcc | ttaggctttc  | accagcggtc  | ttctttctta  |
| 2341 | accagcggtg  | cagagttgct  | attcctatct | ccaaaagctc  | tgccacctca  | acccttgact  |
| 2401 | tccctttttc  | tatcatcgat  | actgcccttt | cccttaaatac | cacactatac  | gccattataa  |
| 2461 | ctcaaatagc  | ttattatacc  | tttatcattt | actttgggaa  | gtactatatg  | aggttgtccg  |
| 2521 | gaaactagta  | aattcaagca  | tattccctct | ttaacataac  | cctactcata  | gctagggtata |
| 2581 | tgaaattctc  | agtggatggt  | gtgagtaaat | catactcctt  | cgatagcctt  | ctattcctat  |
| 2641 | taaccceaagc | aaaagtcctt  | tctacaaccc | atcttcttgg  | ctgtacttta  | aacccttggt  |
| 2701 | ctcttggttg  | tagtagctca  | gggtggcgat | ctttgtgcac  | ccaaaatcta  | catggaggcc  |
| 2761 | ttttaacaat  | ttcaatatct  | atgtcatatt | cttccctttat | gtgattcttt  | aaatttcttc  |
| 2821 | cttgggtatcc | catgtcagcc  | cacatttttt | taacttttagt | atatttttgtt | ctcatattgt  |
| 2881 | ttaatgctat  | tttaatacca  | tctctatcat | tttcggttagc | agcgcctacg  | taacaaccta  |
| 2941 | gtataaaaacc | ctgagtgctc  | gtaattatat | gccttttttct | accctttact  | tttttacttc  |
| 3001 | catcatagcc  | tttgatcccc  | ccttttctgt | agtcttttaca | gattgactat  | ctactataca  |
| 3061 | ggcactcggc  | tgctcattcc  | ttcctatttt | tcttctacta  | tattttgtaa  | tttcataatt  |
| 3121 | catttttctca | aaaattccct  | gcttcttcca | ttgcctgaac  | tgctcataca  | cagtcttcca  |
| 3181 | tagcggaaaa  | tcatttggtg  | aataccgcca | ttgacaccct  | gtacgcaata  | catagaaaat  |
| 3241 | tgcttctaat  | atttctcttt  | tgctataact | tggcggcctt  | cctcctttct  | tgtatgatac  |
| 3301 | tctgaagtgt  | ttttctattc  | ttgccatttc | cctttcgcct  | agatctgttg  | gatacttttt  |
| 3361 | tctcatcttt  | accccgtaact | aaaatttcag | atattatagc  | cttttactta  | tttccggaca  |
| 3421 | acctctaagt  | agagcattta  | ttgcagtagc | agctttttgcc | ggttggtttgc | ctaaactaat  |
| 3481 | aaaggcattt  | actaaactac  | ttgtttcctt | aatatcaaga  | ccaaactggt  | ttgcactacc  |
| 3541 | accaactata  | gctaattgct  | taaccatata | tccttcttta  | gcagcgctat  | tatctgaaag  |
| 3601 | gtgatttata  | atattaccta  | ccctttccat | gccttctact  | tcaattccat  | aaacattagc  |
| 3661 | aagtttagct  | atggaatcac  | ctgcttcttc | tgacagacata | tcgaatgctg  | tagacatttt  |
| 3721 | agctactggt  | tctgtgaatg  | aaagcagttt | ctctttttta  | ataccaaggt  | gtccaccact  |
| 3781 | tgacgctatt  | tgtgctaact  | ctgcagccga | taatgggtatt | gtacgggata  | attcctttta  |
| 3841 | tttctggcca  | aattccacgg  | ctccttggtt | atgggctgca  | tcatacctcag | cgaatctcac  |
| 3901 | tacttttttta | acatcagcca  | tggcagattc | aaagtcaatt  | gcaactttta  | ttggcgctgc  |
| 3961 | aagtgaagc   | cctagcccta  | tagtctccat | tacttggtgat | ctataatgcg  | cctttttttgc |
| 4021 | caaggcattt  | tgctgttttt  | gtatcacaga | tcctagttta  | ctgtattttcc | cttttagtac  |
| 4081 | ttcaatagat  | gaaccaagtt  | tagtttgatc | cctcactaag  | gatttaatat  | cttttccact  |

|      |             |             |             |             |             |             |
|------|-------------|-------------|-------------|-------------|-------------|-------------|
| 4141 | tttccttact  | tcttcattta  | atgtgtgaag  | tgcattctctc | tttttaatat  | aagcctcttt  |
| 4201 | tgcctttgat  | gccgatgctt  | tcaatttttc  | aaattcattt  | tttagtgctt  | tgcttggttc  |
| 4261 | ttttttttcc  | ttcttttctt  | tagcaattgc  | tgcggctgat  | tctttcgctt  | tcttctccgc  |
| 4321 | ttctttccaa  | ttcttcatgg  | ctttaagggc  | atcatgattt  | aattgcttaa  | atgttgagac  |
| 4381 | tgatttcatt  | gacgaatcaa  | gctgccttat  | actatcaccc  | agcttagaaa  | gcttagctgt  |
| 4441 | actacctatc  | attgcgctat  | taaagctacc  | atctaattgca | gcacctatct  | ttattgaaag  |
| 4501 | cattgacatt  | tctttgttac  | tccttcactt  | acttctaacc  | attttagaaa  | ttcttttata  |
| 4561 | cccatattaa  | taatctgctc  | aattccactt  | cctgttattg  | aactaagctt  | taagacattg  |
| 4621 | aatcttaagt  | cctctgttct  | aaaggcgaca  | aaaaatccct  | gagtaccttt  | tgtattttta  |
| 4681 | cgtagtcttt  | gataagtaat  | ttctctatta  | cctcccttgg  | catagatgtc  | aggtagcag   |
| 4741 | ctaaagctac  | ttcttttctg  | gcttcacctt  | ctacacattc  | aatagccagc  | agatctccca  |
| 4801 | ctgtaggctc  | acgcataagg  | aattctgaaa  | cagaaatacc  | atcaactggt  | attggattat  |
| 4861 | caagttttac  | tggtgtcatg  | tttcccccta  | aaagttaatt  | aaataaaaagt | cctcatggct  |
| 4921 | tttacataac  | taattttttt  | acttgaattg  | cagaagttgt  | gttttattga  | agtgaccaca  |
| 4981 | ccttttctaa  | actttttcaa  | caaaaaagtg  | aaaatatatt  | tagtgtatat  | taagtatctt  |
| 5041 | tttagccttc  | ttgtaaatgg  | tatctctatg  | tcctattgta  | actatgggta  | cttcatactt  |
| 5101 | taaagtttct  | gcataatata  | gaacacgata  | atcgccaact  | cttagtcctt  | tatacccttt  |
| 5161 | aaggctatgg  | tctagcgctt  | taccaagatt  | aataggggtca | actgtaagcc  | gctcgtttat  |
| 5221 | tgctttttata | acccttttcc  | ttactgtttt  | cggaagactt  | ggaagatctt  | tctcgagaac  |
| 5281 | attgtctagg  | aagataatag  | tgtatcccaa  | tctacatcct  | cacttttagt  | cttttttgca  |
| 5341 | ccttcaatat  | catactcgtc  | agcaactgca  | gacaaaaaaa  | tgtcttcctc  | ttcaagctca  |
| 5401 | accgcttctc  | tgattagcct  | ttctgctaatt | tcttgagcag  | gctgcttagt  | gagcttggcc  |
| 5461 | agttcagcaa  | gatgctgtga  | agtttctttg  | ctaagagcta  | cattagttcc  | caagtttgcc  |
| 5521 | atatacttta  | ccagaatcca  | ccactgtaatt | tttataatgt  | ttttctaaac  | ttttcaataa  |
| 5581 | aaaagggtgtt | caacatatat  | acttttatatt | ttaacatttt  | tatgtaattt  | tgtcaactag  |
| 5641 | aggttgtccg  | gaaataagta  | aaaggctata  | atatctgaaa  | tttttagtacg | gggtaagat   |
| 5701 | gagaaaaaag  | tatccaacag  | atctaagcga  | aagggaatgg  | gcaagaatag  | aaaaacactt  |
| 5761 | cagagtatca  | tacaagaaag  | gaggaaggcc  | gccaaagtat  | agcaaaagag  | aaatattaga  |
| 5821 | agcaattttc  | tatgtattgc  | gtacaggggtg | tcaatggcgg  | tattttacca  | atgattttcc  |
| 5881 | gctatggaag  | actgtgtatg  | agcagttcag  | gcaatggaag  | aagcagggaa  | tttttgagaa  |
| 5941 | aatgaattat  | gaaattacaa  | aatatagtag  | aagaaaaata  | ggaagggaatg | agcagccgag  |
| 6001 | tgctgtgata  | gtagatagtc  | aatctgtaaa  | gactacagaa  | aaggggggat  | caaaggctat  |
| 6061 | gatggaagta  | aaaaagtaaa  | gggtagaaaa  | aggcatataa  | ttacagacac  | tcagggtttt  |
| 6121 | atactagggt  | gttacgtagg  | cgctgctaac  | gaaaatgata  | gagatgggtat | taaaatagca  |
| 6181 | ttaaacaata  | tgagaacaaa  | atatactaaa  | gttaaaaaaa  | tgtgggctga  | catgggatac  |
| 6241 | caaggaagaa  | atttaaagaa  | tcacataaag  | gaagaatatg  | acatagatat  | tgaaattggt  |
| 6301 | aaaaggcctc  | catgtagatt  | ttgggtgcac  | aaagatacgc  | cacctgagct  | actaccaaca  |
| 6361 | agagaacaag  | ggtttaaaagt | acagccaaga  | agatgggttg  | tagaaaaggac | ttttgcttgg  |
| 6421 | gttaatagga  | atagaaggct  | atcgaaggag  | tatgattttac | tcacaacatc  | cactgagaat  |
| 6481 | ttcatatacc  | tagctatgag  | tagggttatg  | ttaaagaggg  | aatatgcttg  | aatttactag  |
| 6541 | tttccggaca  | acctcttaatt | gtagtaagcg  | aaaaaaatgg  | cgatactcca  | ttacatgaat  |
| 6601 | ctgctagaat  | gaatcgctac  | gatatagttg  | aatatcttgt  | agaggaagaa  | aaggctacta  |
| 6661 | ttgatgtaaa  | aaacttttaga | ggtgagactc  | cttccgattt  | ggcagattct  | aatggttaca  |
| 6721 | aagatatagt  | taagtatctt  | agtcttcgag  | taaggggagtg | tcccaaaacc  | tcgggaagtc  |
| 6781 | tggctgatga  | taaaaatgtg  | atacagtatc  | aaaaagtgc   | agaaaaataa  | cacctaaacta |
| 6841 | taactaatag  | agcaataaag  | accagtttct  | gtgtagggat  | aatgaccatg  | ttgacaagtg  |
| 6901 | tggctattgg  | atgtactgct  | attcatctta  | gtttatcaat  | atcagctact  | gctgcattga  |
| 6961 | ttgttggggc  | cattgctggt  | ggcattacat  | atgcagtatt  | aaagcctaatt | agtaggctaa  |
| 7021 | atgaatgtga  | agtgaatagg  | caaagcttac  | ctcaaattgcc | taaggacgaa  | tggtgcatgt  |
| 7081 | catattagtt  | cttgcatttt  | atgtcatgcg  | tgtgaaaaatg | gtgtgtagta  | tttttaaccg  |
| 7141 | aggtgaagtt  | atggaattga  | ataaattgca  | ggaagtatta  | aattctgcta  | acgctgatgt  |
| 7201 | tggttttcagt | aagagtaattg | tagtttagtaa | aatagaagag  | agatcaaaac  | aagtagatcc  |
| 7261 | aggtacattc  | tgccaattac  | atcttgctgt  | tttaaaaaaac | aataaaacaaa | tggtagaagc  |
| 7321 | ccttataaaa  | ggaggagctg  | atgttaacac  | aattgatgcg  | tacagtcgtg  | atccattata  |
| 7381 | ttatgctatc  | ttgcaaggga  | acacaagaat  | ggtagagatc  | ctaataaaaa  | atggagcaag  |
| 7441 | tgtaataaag  | aagtataatg  | acggaagcac  | tcctctacat  | catgctgtct  | tgagccaaaa  |
| 7501 | aataaaaaata | gtagagtatc  | ttataaacia  | tggagctgat  | gttaatgcgt  | tagatgaaaa  |
| 7561 | acggcgcact  | ccattatact  | tagctggacg  | aagtacacaa  | atggtctcga  | ttctcatgaa  |
| 7621 | gaaggagca   | ttcccttttac | tggaaaacag  | agatattgaa  | tttttaaagg  | atctagttaa  |
| 7681 | acgcatcaaa  | gatgatgata  | cagagtattt  | aaaggaggta  | aagggtgaac  | agaaggaggg  |

```

7741 gcgggtagat gataagtatg agtcaattaa atactcgttg ctgcttagtg ataacagctc
7801 tttgacctct attattaaaa ggaaaaaatt caaaaattta atatctgatt ggtctttcaa
7861 cgtacctgat ttaaaagata accaaaaaaa tttgaataag gcactgttaa atcttcttac
7921 agactttcca tttgtgaca ttacaagggt tgaggacttt ttacacgata acaaagggtga
7981 tgatctaaaa gctgttctca atcttcaaag gggagaatcc aaattgacaa tactacatgt
8041 aatacaagggt atggagtatt tagcagtgga aaaagacata ggttgtgcag ttagtacatt
8101 tatgacttta cttttaaaat ctgggtgctga tcctaacata gttaacagtg aagggcaaac
8161 acctttgcac tatgctgctt attataatac tttaaatata ctttgccttc tgaaaaaagg
8221 agcacgtggg caaactgaca gacaaggaaa aactcctcta gacattgtaa ttattaacaa
8281 aaaacctttt gaagtgaatc ttttagaaca gatcttttta actcaggagc aattggaagc
8341 aaaaaatgat ttagaaggta tttgcgggtc tagctttaac actaatcgac taagaaagtt
8401 tttcaatcag cacaaaggaa atgaaggctt taaagagatt ctcaatctcc gtgattgcga
8461 aggaaagtct cgagtttttc aaaagattag ggaggcttgt tatggtaatg aaactcattt
8521 caaagaagca aaaaagttgc tgctagaagc aggagcgatt gattacgaag agtggaagga
8581 caaaaaacgt ttgcctaagc ttagaactct atgggatgat ttaatattag atcagtcgga
8641 aaagttgaaa atatttttgg gtagggtaaa taaatccaaa gatatagatg agttaaaacg
8701 cgttgtaaac gaagctatag aacttggggg aaggctgaac tttcctaacc agggtagtat
8761 atacggaaag gtatatgaaa aggaatatag ttttacagat tttgtgataa gaaagattag
8821 tgaattaaga aagagttccg aaggttcaag gaatatagag gttgctagtg gtatagtatg
8881 tcaattgata tcaaaagggg caattttgta caacataagc agtatatatg taattgacga
8941 actggaagag tttgaaagcc acaaagctaa tatgaaaaac gcttatgcag attatgagaa
9001 tcgtgcttta gatttcataa caatcggtca aagcgcaaca agtggttaagg taagagacgt
9061 aaaaatcgac aactctactc tctgtcttga atattcacag gatagtaaag tagatgttgc
9121 aaagattaca aatggagcaa ggggttttag tatcactcag gaaggtgtac aatacggag
9181 aaatataata aagataggta agagtggagt agaaattata acgaaaaacg ctataaggaa
9241 ttatgtaggc ctacgagatg gtagtaatat agtattgact ttcgatactg gcttgggaga
9301 gttggaagtg agattatacc ctgataagca aaatctaata aaggtagaag tagaagatca
9361 agaaaagtgg aaaaaattac agaattgtga ggaacgaata ggggaaaaat gtttgcttgg
9421 tgggtgttca gtacgtgatg ctattgaacg aggttttttt actagatctg gagagtgtat
9481 tcgttctgaa acaattagtc aatctgatgc aacaaaagtg ggcccttggg caaagcgcga
9541 aaaaatgaga aaagcttcaa gtcttgaaga aacagtaggc cattctctat aatgaagtga

```

//

```

LOCUS      JAQZAU010000154                15051 bp    dna        linear    ENV 17-MAR-2023
DEFINITION MAG: Wolbachia pipientis isolate wEsol contig_35289, whole genome
            shotgun sequence.
ACCESSION  JAQZAU010000154 JAQZAU010000000
VERSION    JAQZAU010000154.1
DBLINK     BioProject: PRJNA929258
            BioSample: SAMN33142973
KEYWORDS   WGS; ENV; Metagenome Assembled Genome; MAG.
SOURCE     Wolbachia pipientis (insect metagenome)
ORGANISM   Wolbachia pipientis
            Bacteria; Pseudomonadota; Alphaproteobacteria; Rickettsiales;
            Anaplasmataceae; Wolbachieae; Wolbachia.
REFERENCE  1 (bases 1 to 15051)
AUTHORS    Fiutek,N., Couger,B.M., Roy,S., de la Torre,J.R. and Connor,E.F.
TITLE      Genomic assessment of the contribution of the Wolbachia
            endosymbiont of Eurosta solidaginis to gall-induction
JOURNAL    International Journal Molecular Sciences
REFERENCE  2 (bases 1 to 15051)
AUTHORS    Fiutek,N., Couger,B.M., Roy,S., de la Torre,J.R. and Connor,E.F.
TITLE      Direct Submission
JOURNAL    Submitted (10-FEB-2023) Biology, San Francisco State University,
            1600 Holloway Ave, San Francisco, CA 94132, USA
COMMENT    ##Genome-Assembly-Data-START##
            Assembly Date      :: JUN-2019
            Assembly Method    :: FLYE v. 06-2019
            Genome Representation :: Full
            Expected Final Version :: Yes
            Genome Coverage     :: 100.0x

```

Sequencing Technology :: Illumina HiSeq; PacBio Sequel

##Genome-Assembly-Data-END##

FEATURES

|        |                                                                                                                                                                                                                                                                                                                                                                                                                                                                                                                                                                                                                                                                                                                                                                                                                                                                                                                                                                                                                                                                                                                                                          |
|--------|----------------------------------------------------------------------------------------------------------------------------------------------------------------------------------------------------------------------------------------------------------------------------------------------------------------------------------------------------------------------------------------------------------------------------------------------------------------------------------------------------------------------------------------------------------------------------------------------------------------------------------------------------------------------------------------------------------------------------------------------------------------------------------------------------------------------------------------------------------------------------------------------------------------------------------------------------------------------------------------------------------------------------------------------------------------------------------------------------------------------------------------------------------|
| source | 1..15051<br>/organism="Wolbachia pipientis"<br>/mol_type="genomic DNA"<br>/submitter_seqid="contig_35289"<br>/isolate="wEsol"<br>/isolation_source="galls on Solidago altissima"<br>/host="Eurosta solidaginis MN-2018-EFC"<br>/db_xref="taxon:955"<br>/environmental_sample<br>/country="USA: Cowling Arboretum, Carleton College, Northfield, MN"<br>/lat_lon="44.48 N 93.13 W"<br>/altitude="280 m"<br>/collection_date="2018-11"<br>/metagenome_source="insect metagenome"<br>/note="metagenomic"                                                                                                                                                                                                                                                                                                                                                                                                                                                                                                                                                                                                                                                    |
| gene   | <1..318<br>/locus_tag="wEsol_01726"                                                                                                                                                                                                                                                                                                                                                                                                                                                                                                                                                                                                                                                                                                                                                                                                                                                                                                                                                                                                                                                                                                                      |
| CDS    | <1..318<br>/locus_tag="wEsol_01726"<br>/codon_start=1<br>/transl_table=11<br>/product="hypothetical protein"<br>/pfam="Pfam-B_19625"<br>/translation="DEVLFCTGDENGELVTPSGRFRPSNVPTNNLYLKFTFDFTNAAN<br>QVIRELGVMVGTRVKEKLPPGQRYFEPQDIEDPGILLVLEHTVPLIRTSATRETFSFV<br>VTF"<br>/besthit="qcoverage 100 , hcoverage 46.2555066079295 ,<br>similarity 100 , identity 97.1 , evaluate 1.07e-67 ,<br>alnlength 105 , Bacteria , Proteobacteria ,<br>WP_007302857.1 hypothetical protein [Wolbachia<br>endosymbiont of Culex quinquefasciatus]"                                                                                                                                                                                                                                                                                                                                                                                                                                                                                                                                                                                                                  |
| gene   | 325..2259<br>/locus_tag="wEsol_01727"                                                                                                                                                                                                                                                                                                                                                                                                                                                                                                                                                                                                                                                                                                                                                                                                                                                                                                                                                                                                                                                                                                                    |
| CDS    | 325..2259<br>/locus_tag="wEsol_01727"<br>/codon_start=1<br>/transl_table=11<br>/pfam="Pfam-B_288 Pfam-B_288 Pfam-B_288"<br>/fullproduct="qcoverage 100 , hcoverage 100 , similarity<br>98.4 , identity 95.8 , evaluate 0.0 , alnlength 644 ,<br>Bacteria , Proteobacteria , WP_017532581.1 DUF4815<br>domain-containing protein [Wolbachia endosymbiont of<br>Diaphorina citri]"<br>/translation="MTLNSYYNRFNPDKEYEKSFLAGRGLQSAELNETQEYALSKLK<br>GIGDAIFRDGDVITGSNCIIDRETGKVTLESGKIYLRGAVRKVEKEEFIIPLSTIVRI<br>GVYYLESTITELEDENLRDPAVGTRNYQEVGAARLKVSTIWGYQVESVTVNSTNGEFY<br>PIYNIENGVLIEHSPPPQANIVTTALARYDKEANGSYVVNGLEVMLQKEEGEGGKKI<br>FVINEGKAHVDGYEIELPHSIRISFDEDPDIKSVESEPHTFQPNSSQRMELKVNDFPI<br>SEIKKVDITVQKTITVTHGSYSGAIDPIPDASVLEIIQVKQGNVIYENSVDYKLNAGN<br>VDWSLPGKEPAPGSSYQITYRCRTHVSPEDISEQGCKVKGAVDNSLVLIDYTWKMPRF<br>DLITIDSKGVVRRIGIAHPWRPSPMPKAPSGQLLLCYIHQTWKNKEKEGVKIVNNAIH<br>AVPMNELEAMKKGINDLYALVAQERLRSDANSREPTTKKGVFVDSFFDDMDMRDQGISQ<br>SAAIVNKEILPIDVTIADIDEGEKTYLLPYELEPVLEQLLQTKGEKINPYQAFDPVP<br>AQITLNKNIDHWTEVTTNWKSPVTRVFNVKETTELLSSTSYEAEFMREAIQNFEIEGF<br>EPSEKLKEIKFDGIFIQPKA"<br>/product="DUF4815 domain-containing |

```

protein"
/besthit="qcoverage 100 , hcoverage 100 , similarity 98.4
, identity 95.8 , evalue 0.0 , alnlength 644 , Bacteria ,
Proteobacteria , WP_017532581.1 DUF4815 domain-containing
gene protein [Wolbachia endosymbiont of Diaphorina citri]"
2280..3476
/locus_tag="wEsol_01728"
CDS 2280..3476
/locus_tag="wEsol_01728"
/codon_start=1
/transl_table=11
/pfam="Pfam-B_288 Pfam-B_288"
/fullproduct="qcoverage 100 , hcoverage 100 , similarity
97.7 , identity 94.7 , evalue 3.25e-270 , alnlength 398 ,
Bacteria , Proteobacteria , WP_208571638.1 hypothetical
protein [Wolbachia pipientis]"
/translation="MIATFIADNRGKIKGRFTVPRNIPAGTKLVQFFGDKGSYGEATY
TGKKTITIEERRRVIAARRVDPLAQFTLNE SRHIGGVELW FVNKGKKRVVQIRETA
VGVP SQTVIAESYIEPKDIKIDGTATLIEWSPVFCHAGQEYAI VLLTDDADTAVKIAE
LGKYDAVNSRWVTSQPYQVG VLLSSSNASTWTPHQNL DLTFRLLAAKFSEVSHIIDLG
KVTANNVSDLIVLTNVEK VAFDTNVEFILTDEEGRENFLSDNLP LALRERLSGKLT VK
ANLKSKEKSPVLYPGLQLVMGNIGEKGDYVTRSITAGANTKITITYDALIPGTADV K
AYVEQSVKGWQLVNLTSGKPIGENWVERTHVL TNFNSNETRVKLVLSGTVVYRPKVKN
LRIIIT"
/product="hypothetical protein"
/besthit="qcoverage 100 , hcoverage 100 , similarity 97.7
, identity 94.7 , evalue 3.25e-270 , alnlength 398 ,
Bacteria , Proteobacteria , WP_208571638.1 hypothetical
gene protein [Wolbachia pipientis]"
3481..3675
/locus_tag="wEsol_01729"
CDS 3481..3675
/locus_tag="wEsol_01729"
/codon_start=1
/transl_table=11
/fullproduct="qcoverage 100 , hcoverage 100 , similarity
100 , identity 98.4 , evalue 5.70e-37 , alnlength 64 ,
Bacteria , Proteobacteria , WP_214303255.1 hypothetical
protein [Wolbachia endosymbiont of Erebia cassioides]"
/translation="MSDDKTSRGYSLPHPENIAMQDVVRIRTTIEKIDEDITEREDEH
NQLKSNFERFNFETFLNFWK"
/product="hypothetical protein"
/besthit="qcoverage 100 , hcoverage 100 , similarity 100
, identity 98.4 , evalue 5.70e-37 , alnlength 64 ,
Bacteria , Proteobacteria , WP_214303255.1 hypothetical
gene protein [Wolbachia endosymbiont of Erebia cassioides]"
3672..5093
/locus_tag="wEsol_01730"
CDS 3672..5093
/locus_tag="wEsol_01730"
/codon_start=1
/transl_table=11
/pfam="Pfam-B_3372"
/fullproduct="qcoverage 100 , hcoverage 100 , similarity
99.2 , identity 98.7 , evalue 8.30e-295 , alnlength 473 ,
Bacteria , Proteobacteria , WP_070356854.1 hypothetical
protein [Wolbachia endosymbiont of Drosophila incompta]"
/translation="MKEAIYQRIKD LAVSSTPDQLAYLAKSLELIADKKAISDIAQMT
KVKEIIDALQKRLKDLAENSTPDQLAYLAKALESIIDKSAVSEIVQMTDGKLKELLDS
AKKHLTDLDNKKASSLAVISESEKQLLKRIDEKGTTNLSLLDTRKNANIAAINSISNS

```

```

HKDGLKGLVNNFRTVNDVPSGSSIIREIETRIENILNEVKTRDEQLKASLINEIRKRN
MVEPGSLPFLFGVLGRKNNYFGHGTFTTELGWSSDITKTDYMLQLLAGSHTYNTDYV
SFYRPRQLSFIEGSKGTFIYGELCTKSFSGSYDEIYYYPYAALGVVFKNTTNVNINK
TMEFVGSSYSSTEYGGAGLFVGTPDNTNSNKSSISKIVWKNVYQYTSSDSKLAGSGNV
EIPAGKTVAILLYTSSYLYSRTQVSQGMLASNYVHNYGQFIQWGIYNIRSNFLTGTLE
VDVERTLRAWQCPGLERTDQIWO"
/product="hypothetical protein"
/besthit="qcoverage 100 , hcoverage 100 , similarity 99.2
, identity 98.7 , eval 8.30e-295 , alnlength 473 ,
Bacteria , Proteobacteria , WP_070356854.1 hypothetical
protein [Wolbachia endosymbiont of Drosophila incompta]"
gene 5104..5664
/locus_tag="wEsol_01731"
CDS 5104..5664
/locus_tag="wEsol_01731"
/codon_start=1
/transl_table=11
/pfam="Tex_N"
/fullproduct="qcoverage 100 , hcoverage 100 , similarity
98.9 , identity 94.1 , eval 1.94e-115 , alnlength 186 ,
Bacteria;Viruses , Proteobacteria;Uroviricota ,
WP_012673237.1 MULTISPECIES: hypothetical protein
[unclassified Wolbachia]"
/translation="MTIYIRFENHKQIETTTLENKPTGNDWHEAPEDFEWQKSYCLTE
GGEIAQRTKEDIQKELLDNAKLCAFDNIRTHFNNFTSRFSGHSHQAKSYEIQAKTAE
NILTQESIDEKDAAIIEPLARVRGISVEMAKIIEEKA EKAVKAIKCEELEDLAKR
KIEEAKSEEELEDLLNDFKQKIQRNG"
/product="hypothetical protein"
/besthit="qcoverage 100 , hcoverage 100 , similarity 98.9
, identity 94.1 , eval 1.94e-115 , alnlength 186 ,
Bacteria;Viruses , Proteobacteria;Uroviricota ,
WP_012673237.1 MULTISPECIES: hypothetical protein
[unclassified Wolbachia]"
gene 5657..6844
/locus_tag="wEsol_01732"
CDS 5657..6844
/locus_tag="wEsol_01732"
/codon_start=1
/transl_table=11
/fullproduct="qcoverage 100 , hcoverage 100 , similarity
99.5 , identity 98.2 , eval 3.89e-281 , alnlength 395 ,
Bacteria , Proteobacteria , WP_155969562.1 phage tail
sheath subtilisin-like domain-containing protein
[Wolbachia pipientis]"
/cog="COG3497 COG3497 394 Phage tail sheath protein FI"
/pfam="Phage_sheath_1 Phage_sheath_1"
/product="phage tail sheath
subtilisin-like domain-containing protein"
/translation="MAEEFLHGVNVIEVTSGAKTVRTAKSSVIGVIGTAPEADEQKFP
LNKPVLIAAGSLKEAARLGKSGSLPSATNGIFSQIGATVVVIRVKESENSDSKLKES
EQNIIGGVDKETGEYQGIEAFLSSESIVHIAPRILIAPOFTHQLPEIDGVNPFV
SIAEKLRAIIVADGPNTNDEEAIKWRKSVGSSRVYVVDPPWVKVFIEGKEGTL
PASPFPVAGLIAKIDSEQGFHSPSNKEINGIVGTSRPIDFSLGYANCRANHLNENE
VTTIIHQNGYRLWGNRTCSNDSKWAFLSVRRTADLINDSLLRAHLWAVDRNITK
TYIDDVIEGVNSYLASLKAQGAIISGKCYATPELNTPANIASGKVSFDFEFTPP
YPAEQIIFRSHLVNNSVIS"
/besthit="qcoverage 100 , hcoverage 100 , similarity 99.5
, identity 98.2 , eval 3.89e-281 , alnlength 395 ,
Bacteria , Proteobacteria , WP_155969562.1 phage tail
sheath subtilisin-like domain-containing protein

```

```

gene      [Wolbachia pipientis]"
          6856..7356
          /locus_tag="wEsol_01733"
CDS       6856..7356
          /locus_tag="wEsol_01733"
          /codon_start=1
          /transl_table=11
          /fullproduct="qcoverage 101.204819277108 , hcoverage 100
, similarity 96.4 , identity 92.9 , evaluate 9.15e-107 ,
alnlength 168 , Bacteria , Proteobacteria ,
WP_149168984.1 phage major tail tube protein [Wolbachia
endosymbiont of Chrysomya megacephala]"
          /cog="COG3498 COG3498 169 Phage tail tube protein FII"
          /pfam="Phage_tube"
          /tigr="TIGR01611 tail_tube 168 phage major tail tube
protein"
          /product="phage major tail tube protein"
          /translation="MLPKILRNFNVDGRGYAGKIDEITLPKLTIKTEEYRAGGMDI
PINIDMGMEKLEADFTFAEYDSELFRLFGLINNNVSLTLRGGLQGSSDTESVINLR
GLFKELDFGSWKPAEKATLKCTVAAHYKLTIGGNELIEIDAENMIRKINGVDQMALL
QTVLGI"
          /besthit="qcoverage 101.204819277108 , hcoverage 100 ,
similarity 96.4 , identity 92.9 , evaluate 9.15e-107 ,
alnlength 168 , Bacteria , Proteobacteria ,
WP_149168984.1 phage major tail tube protein [Wolbachia
endosymbiont of Chrysomya megacephala]"
gene      7391..7645
          /locus_tag="wEsol_01734"
CDS       7391..7645
          /locus_tag="wEsol_01734"
          /codon_start=1
          /transl_table=11
          /pfam="FluMu_gp41"
          /fullproduct="qcoverage 100 , hcoverage 100 , similarity
100 , identity 100 , evaluate 4.29e-50 , alnlength 84 ,
Bacteria , Proteobacteria , WP_141456746.1 phage tail
assembly protein [Wolbachia endosymbiont of Carposina
sasakii]"
          /translation="MHTITLNNPITVDGISVSELSMREPKVRDLLAIERIEGEALKEV
ALIANLASVPKEVVEDLCIKDYVEIQVKLKDFLSPLEQRT"
          /product="phage tail assembly protein"
          /besthit="qcoverage 100 , hcoverage 100 , similarity 100
, identity 100 , evaluate 4.29e-50 , alnlength 84 ,
Bacteria , Proteobacteria , WP_141456746.1 phage tail
assembly protein [Wolbachia endosymbiont of Carposina
sasakii]"
gene      7761..10028
          /locus_tag="wEsol_01735"
CDS       7761..10028
          /locus_tag="wEsol_01735"
          /codon_start=1
          /transl_table=11
          /pfam="PhageMin_Tail Pfam-B_184 Pfam-B_5741 Pfam-B_5741"
          /fullproduct="qcoverage 100 , hcoverage 100 , similarity
100 , identity 99.7 , evaluate 0.0 , alnlength 755 ,
Bacteria , Proteobacteria , WP_174516836.1 phage tail
tape measure protein [Wolbachia endosymbiont of
Cardiocondyla obscurior]"
          /translation="MSMLSIKIGATLDGSFNSAMTGSAAKLSKLGDSIKQLDSSMKSV
SKFKQLNHDALEAMKNWKEAEKKAKESATAIAKEKKEKKEPSKALRNEFEKLLKASASK

```

```

AKEAYIKKRDALHTLNEEIRKSGKDVKSLVRDQTKLGSSIEVLKKGYSKLGSVIQKQQ
NALARKAHYRSQVMETIGLGLSLAAPIKVAIDFESAMADVKKVNFQTONTNETIEFAK
KLKELSREIPLSAAELAQIAASGGQLGIQKNKLIGFTTTTAKMATAFDISAEQAGDSI
AKLANIYGIAEEKMEGVGNVINHLSDNATAAKAKDMVEALAIVGGTAKQFGLDINQTSS
LVNAFVSLGKQPAKAGTAINALLSKLQTAEGQGKEFKATLESMGITAEEMSQKIAQNG
QEALLHFFKTLEKIDKQERSQILLNLFGEYQDDIALIVGSLKKYEGAIALVADKEY
KHSMQEEFDNRASTTANNLQLLKNTIAELGMNLGSMPLPLNWISKILRSISTGIAWF
AEKCPILTGTGMSIISALIIGKIAVVGFGYAFALAGGGLLTFNAILHGTLPLVLTSL
ARVIPAVIMGLKALTLTNPIGAAIAGLSVGAALVIANWQVKVDFSSIWKSITKPIEN
WIGIGKLFNDNPIKALEKPVEAKIGSATSENRRNVFSKGNPLLNNNTFSGISNSRTNIE
SVITEKGSVADNSEKVLKDCEKCEQKIFNQTFTFNISIKAEPNQDVRSLADAVIKRIR
EKSRDVLFDSEPIY"
/product="phage tail tape measure protein"
/besthit="qcoverage 100 , hcoverage 100 , similarity 100
, identity 99.7 , evalue 0.0 , alnlength 755 , Bacteria ,
Proteobacteria , WP_174516836.1 phage tail tape measure
protein [Wolbachia endosymbiont of Cardiocondyla
obscurior]"
gene 10028..10384
/locus_tag="wEsol_01736"
CDS 10028..10384
/locus_tag="wEsol_01736"
/codon_start=1
/transl_table=11
/fullproduct="qcoverage 100 , hcoverage 100 , similarity
100 , identity 100 , evalue 2.23e-79 , alnlength 118 ,
Bacteria , Proteobacteria , WP_174516835.1 phage tail
protein [Wolbachia endosymbiont of Cardiocondyla
obscurior]"
/cog="COG3499 COG3499 147 Phage protein U"
/pfam="Phage_P2_GpU"
/product="phage tail protein"
/translation="MLSLGRHKLSPTSVRYSKENRWSTIECIGKIPSSQNIGQGTENI
DLEGVIYFHNLDNLNQLKSMKEAEKNQEPSILVDKLGNVLGRFVIIRLEEKQTSYFPC
GLPKKVEFSLSLRRYV"
/besthit="qcoverage 100 , hcoverage 100 , similarity 100
, identity 100 , evalue 2.23e-79 , alnlength 118 ,
Bacteria , Proteobacteria , WP_174516835.1 phage tail
protein [Wolbachia endosymbiont of Cardiocondyla
obscurior]"
gene 10381..10590
/locus_tag="wEsol_01737"
CDS 10381..10590
/locus_tag="wEsol_01737"
/codon_start=1
/transl_table=11
/fullproduct="qcoverage 100 , hcoverage 100 , similarity
100 , identity 100 , evalue 2.58e-42 , alnlength 69 ,
Bacteria , Proteobacteria , WP_174516834.1 tail protein X
[Wolbachia endosymbiont of Cardiocondyla obscurior]"
/cog="COG5004 COG5004 70 P2-like prophage tail protein X"
/pfam="Phage_tail_X"
/product="tail protein X"
/translation="MTVHYITRENEMLDYICFKHYGYSSGAVEIVLEENPGLVDYGSF
LPAGLKIRLPRIQEQLKKSKLKVWE"
/besthit="qcoverage 100 , hcoverage 100 , similarity 100
, identity 100 , evalue 2.58e-42 , alnlength 69 ,
Bacteria , Proteobacteria , WP_174516834.1 tail protein X
[Wolbachia endosymbiont of Cardiocondyla obscurior]"
gene 10591..11526

```

CDS

```

/locus_tag="wEsol_01738"
10591..11526
/locus_tag="wEsol_01738"
/codon_start=1
/transl_table=11
/fullproduct="qcoverage 100 , hcoverage 100 , similarity
99.4 , identity 96.1 , evalue 1.04e-213 , alnlength 311 ,
Bacteria , Proteobacteria , WP_174516833.1 phage tail
protein [Wolbachia endosymbiont of Cardiocondyla
obscurior]"
/cog="COG3500 COG3500 350 Phage protein D"
/pfam="Phage_GPD"
/product="phage tail protein"
/translation="MKPEFSIEGIKDHVISVHLTDESGTIDDIAEVYVDYGNENVEVP
NELNIALGYKETGIFPMGVYTVNEVTIQGPPKTLIKAHATNLRISLKAKVSKEWRQI
TIENLVKEIAQKHGYGYKVAEEFKDVLIPHINQIDESDISLLTKIATEREAMAKLAGG
YILFISKNMAKSATGKALGTTTIRPQDTINWKVHFTVRDKYNSVVAKWHSYEKGETIK
ETVSGSEPSYIMLELYSNAESALSAANAKLKQLKRNNETLDVTMPGNPQIFAEAKLNL
LGFNQALDGEWIINRAEHTLNSSGYLTMLSASLSK"
/besthit="qcoverage 100 , hcoverage 100 , similarity 99.4
, identity 96.1 , evalue 1.04e-213 , alnlength 311 ,
Bacteria , Proteobacteria , WP_174516833.1 phage tail
protein [Wolbachia endosymbiont of Cardiocondyla
obscurior]"

```

gene

11583..12107

CDS

```

/locus_tag="wEsol_01739"
11583..12107
/locus_tag="wEsol_01739"
/codon_start=1
/transl_table=11
/pfam="Ank_2 Ank_2 Ank_5 Pfam-B_1873 Ank_4 Ank_3 Ank
Ank_2 Pfam-B_10896 Ank_4 Ank Ank_5 Ank_3"
/fullproduct="qcoverage 103.448275862069 , hcoverage
101.123595505618 , similarity 85.0 , identity 73.3 ,
evalue 1.92e-71 , alnlength 180 , Bacteria ,
Proteobacteria , WP_047759113.1 ankyrin repeat
domain-containing protein [Wolbachia endosymbiont of
Armadillidium vulgare]"
/translation="MKKIKYNERDKLHFVWFILLIVCVAITYCYQKSKATDNYNKTLQ
VATSNCNLEIVKLLVKDMAPNLSGTTLHCAAEGKCLKLVKFLVNEG VNINDTGRYKGW
TVLHSAAYGGNLEIVKFLLERGANPNTRD TDGKNPRDVAVIESRRNKDKPYDQIIKLL
AEAEDRYKSIERNH"
/product="ankyrin repeat domain-containing
protein"
/besthit="qcoverage 103.448275862069 , hcoverage
101.123595505618 , similarity 85.0 , identity 73.3 ,
evalue 1.92e-71 , alnlength 180 , Bacteria ,
Proteobacteria , WP_047759113.1 ankyrin repeat
domain-containing protein [Wolbachia endosymbiont of
Armadillidium vulgare]"

```

gene

12175..12390

CDS

```

/locus_tag="wEsol_01740"
12175..12390
/locus_tag="wEsol_01740"
/codon_start=1
/transl_table=11
/fullproduct="qcoverage 100 , hcoverage 100 , similarity
100 , identity 100 , evalue 9.63e-39 , alnlength 71 ,
Bacteria , Proteobacteria , WP_006015629.1 MULTISPECIES:
hypothetical protein [Wolbachia]"

```

```

/translation="MKKQKIPITVIVTIVIQTATIWWLAKLDLKVQIHDQFIERNHE
LMETVYRLEERVKNLIEEVNELEQKHK"
/product="hypothetical protein"
/besthit="qcoverage 100 , hcoverage 100 , similarity 100
, identity 100 , evalue 9.63e-39 , alnlength 71 ,
Bacteria , Proteobacteria , WP_006015629.1 MULTISPECIES:
hypothetical protein [Wolbachia]"
gene 12399..13328
/locus_tag="wEsol_01741"
CDS 12399..13328
/locus_tag="wEsol_01741"
/codon_start=1
/transl_table=11
/fullproduct="qcoverage 100 , hcoverage 100 , similarity
97.7 , identity 94.2 , evalue 8.17e-210 , alnlength 309 ,
Bacteria;Viruses , Proteobacteria;Uroviricota ,
WP_077188528.1 patatin-like phospholipase family protein
[Wolbachia pipientis]"
/cog="COG3621 COG3621 394 Patatin"
/pfam="Patatin"
/product="patatin-like phospholipase
family protein"
/translation="MAKYILSVDGGGIRGIIPAILAEIEKRARKPIAEIFHLMAGTS
TGGIVIAGLCKKDKQGNPQYSANDLVELYQKYGSYIFKSSFFRRSILSWFNCAQYPHK
NIEFVLDKYFGDDLQSTLNNVLIASDINNCPFFFKSWKEGNIKLKDALRAATAAP
TYFIPKHLKIDQIDRVLVDGGVFANNPAACAYASGKRLFPNDILLISIGTGRTDRSI
EYANSKRFGKIGWIKPLLNVMFASGLDCVNYQMNQVIGNRYVRIQSQLKLASADMDNI
TSKNIKSLQQEAKAMIEDNQKAIEKFCIEVLNI"
/besthit="qcoverage 100 , hcoverage 100 , similarity 97.7
, identity 94.2 , evalue 8.17e-210 , alnlength 309 ,
Bacteria;Viruses , Proteobacteria;Uroviricota ,
WP_077188528.1 patatin-like phospholipase family protein
[Wolbachia pipientis]"
gene complement(13356..14267)
/locus_tag="wEsol_01742"
CDS complement(13356..14267)
/locus_tag="wEsol_01742"
/codon_start=1
/transl_table=11
/pfam="HTH_19 HTH_31 HTH_3 Pfam-B_114 HTH_31 HTH_19
HTH_3"
/fullproduct="qcoverage 100 , hcoverage 101 , similarity
95.7 , identity 92.7 , evalue 9.97e-189 , alnlength 303 ,
Bacteria , Proteobacteria , WP_226080811.1
helix-turn-helix domain-containing protein [Wolbachia
endosymbiont of Tribolium confusum]"
/translation="MFVSVSDISSISYKIGQKIEDSRLMRGHTQVELASEIGLTYQEV
NSYENGYIPIPIEVLYVIARVLSVNAIDLPEPVIVREDSYEDEEILYLTKIYENQKL
GKIVPSLVRFVHISEKINQEEARLEIAKNLVKEGVSVDIISQATGLSIYEYDNTEREI
CTDSIYYRIGQRIREWRLIKRYTQKDLANKVGLTLKEIHEYEIGYTAISFDKLYQIAE
GLSVNIKVLLPKTNEDSELLNLLRKTEEQELVKKFLSRDMKNSKEKVKKTEKIKVAKN
LVKAGVSTDVILRASGLTADELGECEN"
/product="helix-turn-helix
domain-containing protein"
/besthit="qcoverage 100 , hcoverage 101 , similarity 95.7
, identity 92.7 , evalue 9.97e-189 , alnlength 303 ,
Bacteria , Proteobacteria , WP_226080811.1
helix-turn-helix domain-containing protein [Wolbachia
endosymbiont of Tribolium confusum]"
gene complement(14293..>15051)

```

CDS

```
/locus_tag="wEsol_01743"  
complement(14293..>15051)  
/locus_tag="wEsol_01743"  
/codon_start=1  
/transl_table=11  
/pfam="HTH_31 HTH_37 HTH_19 HTH_3 HTH_26"  
/fullproduct="qcoverage 100 , hcoverage 84.5637583892617  
, similarity 100 , identity 100 , evaluate 3.87e-163 ,  
alnlength 252 , Bacteria , Proteobacteria , RLT59548.1  
helix-turn-helix domain protein [Wolbachia endosymbiont  
of Drosophila ananassae]"  
/translation="RISIERLYAITEALSISITDLIPISKSCLEDEGEIEILNLVREYK  
KINDQELRKMFCLLTNFVQVSEKSSKKAEEKIKIAKGLVKAGVSVDIVAKTIGLSADEC  
VEEKGGSIYCQIGKKIKEWRLVREYTOQDLVEKMSTTRDEISNYEQGRTAVPLDKLYE  
MAEALSINITDLLIEEGSKVKNELPDLIKEYKEIESQELRHALIKSLFEGIRICEEKV  
REIERIKVAKDLVKGGISIDIILQIIGLSVDQIA"  
/product="helix-turn-helix domain protein"  
/besthit="qcoverage 100 , hcoverage 84.5637583892617 ,  
similarity 100 , identity 100 , evaluate 3.87e-163 ,  
alnlength 252 , Bacteria , Proteobacteria , RLT59548.1  
helix-turn-helix domain protein [Wolbachia endosymbiont  
of Drosophila ananassae]"
```

ORIGIN

```
1 gatgaggtgc tcttttgcac aggtgatgag aatggagaac ttgtgactcc atctggaagg  
61 ttagggccct caaatgtacc aactaataat ctctatctca aatttacttt cgatttcaca  
121 aacgcagcaa atcaagttat acgggaatta ggagttatgg ttggtacaag ggtaaaagaa  
181 aaattgcctc ctggacaaag gtattttgaa ccacaagata tagaagaccc agggatctta  
241 ttagtttttag aacacaccgt accacttatc agaacatctg caactcggga aactttttca  
301 tttgtttgtaa ctttttgaaa caaatgacc ttaaatagtt attataaccg ctttaaatcct  
361 gacaaagaat acgaaaaaag cttattttctt gctggaagag gtctacagtc tgcagaatta  
421 aacgagactc aggagtatgc tctctctaag cttaaaggca taggcgatgc aatatttcgt  
481 gatggtgatg ttataacagg aagcaattgt attatagata gagaaactgg taaagttagc  
541 cttgaatcag gaaaaatcta tcttcgtgga gcagttagaa aagtcgaaaa agaagaattt  
601 attattccac tgagtactat agttcgcata ggtgtttatt atctagaatc taccattaca  
661 gaacttgagg acgaaaaatct tcgtgatcct gctgttggta caagaaacta tcaggaagta  
721 ggagctgcaa ggcttaaaagt ttccaccatt tggggatacc aagtagaaag tgttactggt  
781 aactctacaa atggcgcaatt ttacccaatt tacaatattg aaaatggagt attgatagaa  
841 cattcaccgc caccacaagc aaatatagta actactgctc ttgctcgtta tgacaaagag  
901 gcaaatgggt cctacgttgt aaatggcctt gaagtaaatgt tcctgcaaaa ggaagagggg  
961 gaaggaggaa aaaaaatatt tgtaattaat gagggaaaag ctcatgttga tggctatgag  
1021 attgagttac ctcacagtat tcgcatttct tttgatgaag atccggatat aaaatcagtt  
1081 gaatcagaac cacatacttt tcagccaaat agccaaaagag taatggaact gaaggtgaat  
1141 gattttccaa taagtgaaat taaaaaagta gatataactg ttcagaaaac cattactggt  
1201 actcatgggt catactctgg agctattgat ccgatacctg actctgcagt acttgagatt  
1261 attcaagtta aacaaggcaa tgttatttat gaaaatagtg tagattataa actaaacgca  
1321 ggaaacgttg attggtcatt acccggcaaa gagccagctc ctggaagtag ttatcaaata  
1381 acttaccgct gtcgtactca tgtaagccct gaagatataa gtgaacaggg atgcaaagta  
1441 aaaggagcag ttgataacag cttggttttg atagattata cctggaaaat gccacgcttt  
1501 gatttaatta ctatcgatag caaaggagta gtaagaagaa taaaaggat agctcaccct  
1561 tggcgaccat caatgcctaa agcacctagc ggacaacttt tgctctgcta cattcatcag  
1621 acatggaaaa acggagaaaa agaaggggta aaaatagtga ataatgctat tcatgctgta  
1681 ccgatgaatg agcttgaagc aatgaaaaaa ggaataaatg atctttatgc tcttgttgca  
1741 caggaacgtc tacgtagtga tgcaaattca agagaaccta ccacaaaaaa aggagtattt  
1801 gttgattcgt tttttgacga tgatatgcgt gatcaaggaa tttcgcagtc tgcagcaata  
1861 gtaaataagg aactaatttt accaatagat gtaacgattg ctgatattga tgagggggag  
1921 aaaacttatt tattgccata tgaacttgaa ccggtactgg agcagctttt acagactaaa  
1981 ggagaaaaaa ttaatccgta tcaagctttt gatccagttc cggcaciaat tactctaaat  
2041 aaaaatatag accactggac ggaggttacc acgaattgga aaagtccagt aactagagta  
2101 tttaatgtta aagaaacaac agagctgctg tcaagtactt catacgaagc tgaatttatg  
2161 agagaagcaa tacagaattt tgagatcgaa ggttttgagc caagtgagaa gcttaaagag
```

|      |             |             |             |             |               |             |
|------|-------------|-------------|-------------|-------------|---------------|-------------|
| 2221 | ataaagtttg  | atggaatttt  | tattcaacct  | aaagcataga  | aaatatttga    | aagaaaaaca  |
| 2281 | tgatcgcaac  | at ttattgct | gataacagag  | gaaaaataaa  | aggaagattt    | actgtaccaa  |
| 2341 | gaaacattcc  | tgctgggact  | aagttagtgc  | agttcttcgg  | tgataaaggc    | agttatggag  |
| 2401 | aagcaactta  | tactggtaaa  | aaaacaatta  | ccatagagga  | aagaagaaga    | gttatcgcag  |
| 2461 | caagaagagt  | tgatccttta  | gcgcaaacat  | ttactctaaa  | tgaaagtagg    | cacataggag  |
| 2521 | gcgtggaact  | atggtttgta  | aataaaggca  | aaaaacgtgt  | tgttggtgcag   | attagagaaa  |
| 2581 | cagcagtggg  | agtgccctcg  | caaactgtca  | ttgctgaaag  | ctatataggag   | ccaaaagata  |
| 2641 | taaagataga  | tggcacagca  | acacttatag  | agtgggtcacc | agtgttttgc    | catgcaggac  |
| 2701 | aagagtatgc  | aatagtgtca  | ctcactgatg  | atgcagatac  | tgcagtaaaa    | atagcagaac  |
| 2761 | ttggcaaata  | tgatgcagta  | aatagccgtt  | gggtaacaag  | tcaaccatat    | caagtaggag  |
| 2821 | tattactatc  | atcaagcaat  | gcaagtactt  | ggacaccaca  | tcaaaattta    | gatttaacgt  |
| 2881 | ttcgattact  | agctgcaaaa  | tttagcggaag | tttctcacat  | tattgatctg    | ggtaaagtta  |
| 2941 | ctgcaaataa  | tgtatcagat  | ttaattgttt  | tgacgaacgt  | cgaaaaagta    | gcatttgata  |
| 3001 | ctaagttaga  | at ttatatta | acagatgaag  | aggggaagaga | aaactttttg    | tctgataatt  |
| 3061 | tgccacttgc  | actacgtgaa  | agactatctg  | gaaagctaac  | agtaaaggca    | aattttaaag  |
| 3121 | ggtcaaaaaga | aaaaagtcca  | gtgctatatc  | ctgggttaca  | gctagttagg    | ggtaatatag  |
| 3181 | gggaaaaagg  | agattatgtt  | acaagaagta  | ttacagcagg  | agctaatact    | aaaatcacca  |
| 3241 | taacgtacga  | tgcgctgata  | cctggcactg  | cagatgttaa  | agcatatgtg    | gaacaaagcg  |
| 3301 | tcaaaggatg  | gcaattagta  | aatttaacat  | caggaaaacc  | tattggggaa    | aattgggtgg  |
| 3361 | agagaactca  | tgtactaaca  | aactttaata  | gcaatgaaac  | aagggtaaaa    | ttgggtttta  |
| 3421 | gtggaacagt  | tgtttatcgc  | cctaaagtca  | aaaatctacg  | aatcattatc    | acttagcaga  |
| 3481 | atgtcagatg  | ataaaacaag  | tagaggatat  | tctttgcctc  | atccagaaaa    | tattgctatg  |
| 3541 | caggatgttg  | ttcgatatccg | taccacaatt  | gagaaaatag  | atgaagatat    | taccgaaaga  |
| 3601 | gaagatgagc  | ataatcaact  | taaaagtaat  | tttgagcggg  | ttacttttga    | aactttttta  |
| 3661 | aatttttgga  | aatgaaagaa  | gcaatatacc  | aaaggataaa  | ggatttagca    | gtaagtagca  |
| 3721 | cacctgatca  | actggcatat  | cttgcaaaat  | cgctggaatt  | gatagcagat    | aaaaaagcta  |
| 3781 | tttctgatat  | tgcgcaaatg  | actaaagtaa  | aagaaataat  | tgatgcacta    | caaaagaggc  |
| 3841 | ttaaggattt  | agcagaaaac  | agtacaccag  | atcaattagc  | atatcttgct    | aaagcattgg  |
| 3901 | aatcaataat  | cgacaaaagt  | gcagtttctg  | aaattgtaca  | gatgacagat    | ggtaagctaa  |
| 3961 | aagaacttct  | tgatagtgca  | aaaaaacact  | taactgatct  | ggataataaa    | aaagctagtt  |
| 4021 | cttttagcagt | gatctctgaa  | tcagagaagc  | agttattaaa  | gagaattgat    | gaaaaaggaa  |
| 4081 | caacaaattt  | atcgctactt  | gatacgagaa  | agaatgccaa  | tattgcagca    | ataaatagca  |
| 4141 | ttagtaacag  | tcataaagat  | ggtcttaaaag | gttttagtgaa | taacttccgt    | actgttaatg  |
| 4201 | atgtgccaaag | tggctcatca  | attattaggg  | aaatagaaac  | tcgaattgaa    | aacatcctga  |
| 4261 | atgaggtaaa  | aactcgggat  | gaacagttaa  | aagcgtctct  | tataaatgaa    | ataagaaagc  |
| 4321 | gcaacatggg  | tgaaccaggg  | tcattacctt  | tcttatttgg  | tgtacttggc    | agaaaaaata  |
| 4381 | attatttttg  | ccacggaact  | tttacgacag  | agcttggaag  | gtggagtagt    | gatataacaa  |
| 4441 | aaactgacta  | tatgtttacaa | ctactagcag  | gtagccatac  | gtacaatata    | gattacgtta  |
| 4501 | gttttttatcg | gccaagacaa  | ctaagtttta  | tagagggaag  | taaagggaaca   | tttatttacg  |
| 4561 | gagagttagt  | cacaaaaagt  | ttttcgggta  | gttatgatga  | gatatactat    | taccctgatg  |
| 4621 | ctgcacttgg  | agtagtat tt | gtaaaaaata  | caaccaatgt  | gaacataaat    | aagacaatgg  |
| 4681 | aatttgttgg  | atcatcgtat  | tcgagtacgg  | agtatggggg  | agcaggatta    | tttggtggaa  |
| 4741 | ctcctgataa  | cactaattct  | aataaatcaa  | gtatttcaaa  | aatagtatgg    | aaaaatgttt  |
| 4801 | accaatacac  | gagttctgat  | agcaagttag  | ccggatctgg  | taatgtggag    | attccagcag  |
| 4861 | gaaaaacagt  | tgcaatat ta | ctttacacat  | catcttatct  | gtattccaga    | acacaagtta  |
| 4921 | gtcaagggtat | gcttgcatca  | aattatgtac  | acaactatgg  | tcaattttatt   | cagtggggga  |
| 4981 | tttataacat  | acgtagcaat  | tttctcacca  | cagggtctga  | ggtagatgtg    | gaaaggacgc  |
| 5041 | tcagggtctg  | gcaatgtcca  | gggttagaac  | gaactgatca  | aatatggcaa    | tgaggaggaa  |
| 5101 | tttgtgacta  | tttatatacg  | ttttgaaaaac | cacaagcaga  | ttgaaacaac    | aacacttgaa  |
| 5161 | aacaagccaa  | ctggaaatga  | ttggcatgaa  | gcaccagaag  | at ttttgaaatg | gcaaaaagagt |
| 5221 | tattgtctaa  | cggaaggagg  | agaaattgct  | cagcgtacta  | aagaagatat    | acaaaaggag  |
| 5281 | ttactggata  | atgcgaagct  | ctgtgcattt  | gacaatatct  | gtactcattt    | taataacttt  |
| 5341 | actagtagat  | tctcagggca  | ctctcatcaa  | aaggctaagt  | cgtacgagat    | tcaagcaaaa  |
| 5401 | accgcggaga  | acatttttaac | aacacaagaa  | tctatagatg  | agaaggatgc    | agcaattata  |
| 5461 | gagccactgg  | caagagtggg  | agggatttca  | gtagtggaga  | tggcaaaaat    | aatagaagag  |
| 5521 | aaggcagaaa  | aagcagtaaa  | agcaataatt  | aaatgtgaag  | agcttgaaga    | tttagccaag  |
| 5581 | agaaagattg  | aagaagccaa  | aagtgaagaa  | gagctagagg  | acttactaaa    | cgatttttaa  |
| 5641 | caaaagatac  | aaagaaatgg  | ctgaagaatt  | tttacacgga  | gtaaatgtta    | ttgaggtaac  |
| 5701 | ctcaggagca  | aagacagtac  | gtacagctaa  | atcatcagtg  | ataggtgtaa    | ttggtactgc  |
| 5761 | ccctgaagct  | gatgagcaaa  | agtttccgct  | aaataaacca  | gtgttaattg    | caggaagctt  |

|      |             |             |             |             |             |             |
|------|-------------|-------------|-------------|-------------|-------------|-------------|
| 5821 | aaaagaagca  | gcaagacttg  | gaaagagtgg  | cagtttacct  | tctgcaacaa  | acggaatatt  |
| 5881 | ttcccagatt  | ggtgcaacag  | tagtagttat  | tcgagttaaa  | gaaagtgaaa  | acagcgattc  |
| 5941 | aaagctcaaa  | gaaagtgaaa  | ctatccaaaa  | tataattggc  | ggtgttgata  | aagagactgg  |
| 6001 | agagtatcaa  | gggatatagg  | cattcctcag  | tagtgaaagc  | atagttcata  | ttgctccaag  |
| 6061 | aatattaatt  | gcacctcagt  | ttactcatca  | gttacctgaa  | atagatggag  | taaatccagt  |
| 6121 | agtgagtgtc  | ttaatTTcca  | tagcagaaaa  | attaagagca  | attattgttg  | cagatggacc  |
| 6181 | aaatacta    | gatgaagaag  | caataaaatg  | gagaaaaagt  | gtaggcagct  | caagagttta  |
| 6241 | cgtagttgac  | ccttgggTTa  | aggtattttat | tgaaggaaaa  | gaaggaacct  | tgccagcaag  |
| 6301 | cccatttgta  | gctggTTtaa  | tagctaaaa   | agacagcgaa  | caaggcttct  | ggcattcacc  |
| 6361 | ttcaaataaa  | gagataaaatg | gtattgttgg  | cacaagcagg  | cctattgatt  | ttagcttagg  |
| 6421 | ttatgcaaat  | tgcagagcaa  | accactttaa  | tgaaaatgaa  | gtaacaacga  | taattcatca  |
| 6481 | aaacggctat  | aggctttggg  | gaaatagaac  | atgttcaaat  | gactcaaaat  | gggcttttct  |
| 6541 | gtcagtgaga  | aggactgcag  | atttaataca  | tgatagtcta  | cttcgagctc  | atctctgggc  |
| 6601 | agttgatcgc  | aatatcacia  | aaacttatat  | agatgatgtg  | attgaggggg  | tgaattctta  |
| 6661 | ccttgcaagt  | ttaaaagcgc  | aaggagcaat  | tatcagtggg  | aaatgttatg  | caactcccg   |
| 6721 | actcaataca  | ccggcaaata  | ttgcaagcgg  | aaaagtgtct  | tttgattttg  | agtttacacc  |
| 6781 | gccatatcca  | gctgagcaaa  | taatattcag  | atcccattct  | gtaaataata  | gtgtaataag  |
| 6841 | ttaggagaaa  | gcgaagtgtt  | acccaaaata  | ctgagaaatt  | ttaacgtatt  | tgtagatggg  |
| 6901 | cgtaggttat  | caggaaaaat  | agatgaaata  | accttgccga  | agcttaccat  | aaaaaccgaa  |
| 6961 | gagtacagag  | ctgggtggtat | ggatattcca  | ataaatattg  | atatgggcat  | ggaaaagctt  |
| 7021 | gaagcagatt  | tcacttttgc  | tgaatatgac  | tctgagctct  | ttagactttt  | cggattgata  |
| 7081 | aacaataatg  | cagtttctct  | tactttaaga  | ggaggtttgc  | aggggaagtag | tgatacagaa  |
| 7141 | tcagtagtga  | ttactttaag  | agggtctctt  | aaagaacttg  | atTTtggtag  | ctggaaacct  |
| 7201 | gctgaaaaag  | caacgctgaa  | atgtactgta  | gctgcccatt  | actacaaact  | tactataggt  |
| 7261 | ggtaatgaat  | taatagaaat  | cgatgctgaa  | aatatgatta  | gaaagataaa  | tggtgtggat  |
| 7321 | cagatggctt  | tgctacaaac  | ggTTTTaggg  | atatgaaaag  | atttcgaaat  | tttattttaa  |
| 7381 | ggaggcaata  | atgcacacta  | taacactaaa  | caaccaatt   | acagttgatg  | gaatttctgt  |
| 7441 | ctcagagtta  | tcgatgcgtg  | aacctaaagt  | aagagattta  | cttgctatag  | aacgcataga  |
| 7501 | aggcgaagct  | ttgaaagagg  | tagctttaat  | tgctaatacta | gcatctgtgc  | caaaagaagt  |
| 7561 | agttgaagat  | ttatgtatta  | aagattatgt  | agaaatacaa  | aagggtactaa | aagatttttt  |
| 7621 | gtcgccgctg  | gaacagagaa  | cttaaagtat  | aatgtattac  | tactcagttc  | tatttcagga  |
| 7681 | agtggaattg  | agcagattac  | taatattgat  | gtaaatgaat  | ttttatcctg  | gatagaaata  |
| 7741 | agtaaaggag  | tggcaaaaaa  | atgtcaatgc  | tttcaataaa  | gatcgggtgca | acattagatg  |
| 7801 | gcagtttttaa | tagtgcaatg  | acaggtagtg  | cagcaaaagct | ttctaagttg  | ggtgatagta  |
| 7861 | taaagcagct  | tgattcgtca  | atgaaatcag  | tctccaaatt  | taagcaatta  | aatcatgatg  |
| 7921 | ctcttgaagc  | catgaagaat  | tggaaaggaag | cggagaagaa  | agcaaaagaa  | tcagctacag  |
| 7981 | caatcgctaa  | agagaagaag  | gaaaaaaaag  | aaccaagcaa  | agcactgaga  | aatgaattcg  |
| 8041 | aaaaattgaa  | agcatcggca  | tcaaaggcaa  | aagaggctta  | tattaaaaag  | agagatgcac  |
| 8101 | ttcacacatt  | aaatgaagaa  | atcaggaaaa  | gtggaaaagga | tgTTaaatct  | ttagttagag  |
| 8161 | atcaaactaa  | acttggttca  | tctattgaag  | tactaaaagg  | aaaatacagt  | aaattaggat  |
| 8221 | ctgtaataca  | aaaacagcaa  | aatgcttttag | caagaaaagc  | gcattataga  | tcacaagtaa  |
| 8281 | tggagactat  | aggactagga  | ctttcacttg  | cagcaccaat  | taaagttgcg  | attgattttg  |
| 8341 | aaagtgtctat | ggctgatgtt  | aagaaggtag  | taaactttac  | tcagaacaca  | aatgaaacta  |
| 8401 | ttgagtttgc  | taagaagcta  | aaagaattat  | ctcgtgaaat  | accgctatca  | gctgcagagt  |
| 8461 | tagcacaaat  | agctgcaaag  | ggtggccaac  | ttgggattca  | aaaaaataag  | ttaatTggat  |
| 8521 | ttacaacaac  | agtagctaaa  | atggctacag  | catttgacat  | ttctgctgaa  | caagctgggtg |
| 8581 | attctattgc  | caaactcgct  | aacattttatg | gaattgcaga  | agaaaaaatg  | gaaggagtTg  |
| 8641 | gcaacgttat  | aaatcacctc  | tcagataaca  | ctgctgccaa  | agcaaaagat  | atgggtgaa   |
| 8701 | ctctagcaat  | agttggTggt  | actgcaaaac  | aatttggttt  | agatattaat  | cagacaagta  |
| 8761 | gttttagtaaa | tgccttcgTt  | agtttaggta  | aacaaccagc  | aaaagcagga  | actgccataa  |
| 8821 | acgcttttact | ttctaagctc  | caaactgctg  | agggacaagg  | aaaagaattt  | aaagcaacat  |
| 8881 | tggaatccat  | gggcataacc  | gcagaagaga  | tgTcacaaaa  | aattgctcaa  | aacggTcaag  |
| 8941 | aagcattact  | ccattttttt  | aaaacttttag | agaaaaataga | taaacaagaa  | cgttcacaaa  |
| 9001 | tccttctcaa  | tctctttTgt  | caagaatatc  | aagatgatat  | tgcattgata  | gttTggaagcc |
| 9061 | taaaaaaata  | tgaaggtgcc  | atagctctTg  | tagctgacaa  | agaaaaagtat | aaacattcca  |
| 9121 | tgcaagaaga  | atttgacaat  | cgcgcaagta  | ctacagcaaa  | taattTgcag  | ctactcaaaa  |
| 9181 | atacaatagc  | agagctagga  | atgaacttag  | ggTcagttat  | gctgcctcct  | ttaaattTgga |
| 9241 | taagtaagat  | tttgaggtct  | atatctacag  | gtatagctTg  | gttcgcagag  | aagTgtccaa  |
| 9301 | ttttgactac  | aggagttatg  | agcataattt  | cagctcttat  | tattTggaag  | attTcagTgg  |
| 9361 | taggtttTtg  | ttatgcattt  | gcattTggctg | gaggtTggact | attaactttt  | aatTgctattt |

|       |             |             |             |             |             |            |
|-------|-------------|-------------|-------------|-------------|-------------|------------|
| 9421  | tgcatggaac  | acttttgcca  | gtattaactt  | cgttatcagc  | acgagtaatt  | ccagcagtaa |
| 9481  | tcatgggact  | gaaagcttta  | acgctaacca  | atcctatagg  | agctgctatt  | gctggactat |
| 9541  | cagttgggtgc | agcacttgta  | atcgctaatt  | ggcaaaaagg  | aaaggacttt  | ttctcgagta |
| 9601  | tctggaaatc  | aattacaaaa  | cctatagaaa  | attggattgg  | tataggaaaa  | ttgtttaatg |
| 9661  | ataatccaat  | aaaagcatta  | gagaaaccag  | tagaagcaaa  | aataggcagt  | gcaactagt  |
| 9721  | aaaatagaaa  | tgtttttagt  | aaaggaaatc  | ctttattaaa  | taataatact  | tttagtgtaa |
| 9781  | tttcgaatag  | tagaacgaat  | attgaaagt   | tgattacaga  | aaaaggttct  | gtagcagata |
| 9841  | attcagagaa  | agtttttaaa  | gactgtgaaa  | agtgtgaaca  | aaaaattttc  | aatcaaactt |
| 9901  | ttacatttaa  | tataagtatt  | aaagcagaac  | ctaaccaaga  | tgtacgtagt  | cttgccgatg |
| 9961  | cagtgataaa  | aagaataaga  | gaaaaatcgc  | gtgacgttct  | gtttgattca  | gtagagccga |
| 10021 | tttactaatg  | ctatcacttg  | gccggcataa  | gctttctcca  | acaagtgtaa  | ggtatagtaa |
| 10081 | agaaaatcgt  | tggagtacaa  | ttgagtgtat  | tggtaaaaata | ccttcatac   | aaaatattgg |
| 10141 | tcaaggtaca  | gaaaatatag  | acttagaagg  | agtaatttat  | ttccataatc  | taaatgattt |
| 10201 | aaatcaatta  | aaaagtatga  | aagaagctga  | gaaaaatcag  | gaaccaagta  | tcttagtaga |
| 10261 | taaattagga  | aatgttttgg  | gaagatttgt  | tattatacgg  | ttagaagaaa  | agcaaacgct |
| 10321 | gtattttccc  | tgtggattac  | ctaaaaagg   | tgaatttagt  | ttaagtttaa  | ggcgttatgt |
| 10381 | atgacagtac  | attatataac  | cagagaaaac  | gaaatgttag  | attacatatg  | ttttaaacac |
| 10441 | tatggatata  | gctctggagc  | agtagaaata  | gtattggagg  | aaaaccctgg  | actttagat  |
| 10501 | tatggaagtt  | ttttgcctgc  | aggattaaag  | atcagggttac | ctagaataca  | agagcaatta |
| 10561 | aaaaaatcga  | agttaaaagt  | gtgggaataa  | atgaaacctg  | aatttagcat  | tgaaggaata |
| 10621 | aaagatcatg  | taatatcgg   | gcacttact   | gatgaatctg  | gtactataga  | tgatatcgca |
| 10681 | gaggtatatg  | ttgattatgg  | caatgaaaat  | gtagaagttc  | caaatagaatt | gaacatagca |
| 10741 | ctagggtata  | aggaaacggg  | aatctttcca  | atgggtgtat  | atacagtcaa  | tgaagttacg |
| 10801 | atacaaggcc  | cacctaagac  | cctactaata  | aaagctcatg  | caacaaattt  | aagaatatct |
| 10861 | ttgaaggcaa  | aagtatcaaa  | agaatggcgc  | caaattacca  | tagaaaactt  | agtaaaagaa |
| 10921 | atagcccaaa  | aacatggata  | tggatataaa  | gttgctgagg  | aatttaagga  | tgtactgata |
| 10981 | ccccacatca  | accaaataga  | cgaaagtgat  | atcagcttgt  | taactaaaat  | agcaacagag |
| 11041 | cgtgaagcaa  | tggcaaaaatt | agctgggtgga | tatatattat  | ttattttcaa  | aaacatggca |
| 11101 | aaatcagcta  | caggaaaagc  | tttaggaaca  | acgactatta  | gacctcaaga  | cacaattaat |
| 11161 | tggaaagtgc  | attttaccgt  | acgtgataag  | tataattcag  | tagtggcaaa  | gtggcatagc |
| 11221 | tatgaaaagg  | gcgaaactat  | taaagaaaca  | gttggttagcg | gtgagccaag  | ttatatattg |
| 11281 | ctggaacttt  | actcaaatgc  | agagtcagca  | ctaagtgcag  | caaatgccaa  | gttgaaacaa |
| 11341 | ttgaagcgta  | acaatgaaac  | tttagatgta  | actatgcctg  | gtaatcctca  | aatttttgca |
| 11401 | gaagctaaac  | ttaatcttct  | aggttttaat  | caagcgtag   | atgggtgaatg | gataattaat |
| 11461 | agagcggagc  | atacttttaa  | tagctcgggt  | taccttacta  | tgttgtcagc  | atctttgagt |
| 11521 | aagtaatggt  | aagaaaaaaa  | tgagtaatga  | tctattttaat | atgaagaaac  | tgtgtgccaa |
| 11581 | atatgaaaaa  | aataaagtat  | aatgaaagag  | ataaaactaca | tttcgtatgg  | ttcatactat |
| 11641 | taatagtatg  | cgttgctatt  | acttattgct  | atcaaaaaatc | taaagctaca  | gataattata |
| 11701 | acaaaacatt  | acaagtggct  | actagtaatt  | gcaacttaga  | aatagtaaaa  | cttttagtaa |
| 11761 | aggatatggc  | tccaaacttg  | agtggaaaca  | cgttacattg  | tgacagcagag | ggaaagtgtc |
| 11821 | taaaattagt  | aaaattttcta | gtgaatgaag  | gagttaatat  | aaatgatata  | ggtagatata |
| 11881 | aaggatggac  | agtattacat  | tctgccgcac  | acggaggcaa  | tttagagata  | gttaagttct |
| 11941 | tattagaaag  | agggtgcta   | cctaatacta  | gagatacaga  | tggaaaaaat  | cctcgagatg |
| 12001 | tagctgta    | agaatcaagg  | cgcaacaaag  | acaagcccta  | cgatcaaata  | ataaagctac |
| 12061 | ttgcagaagc  | agaggatcga  | tacaaatcaa  | tagaaagaaa  | tcactaaagc  | tgtaagtttt |
| 12121 | ctataatctg  | tatataaaact | tctaaaacta  | tccataacaa  | gttaatatct  | tcacatgaaa |
| 12181 | aagcaaaaaa  | tcccaatcac  | agtaatagta  | acgatagtaa  | tacagaccat  | agcaacaatt |
| 12241 | tgggtggctcg | ctaagcttga  | tttaaaagta  | caaattcatg  | atcaattttat | agaacgaaat |
| 12301 | cacgaactaa  | tggaaacagt  | ttatcgctt   | gaggagcggg  | taaaaaacct  | cattgaagaa |
| 12361 | gttaatgagc  | ttgagcaaaa  | acacaaataa  | atttcacagt  | ggcaaaaatac | atcctttcag |
| 12421 | ttgacggcgg  | aggcataagg  | ggcataatac  | cagccatcat  | tctagcagaa  | atagaaaaga |
| 12481 | gagcaaggaa  | accgatagct  | gaaatctttc  | acttaatggc  | aggaacctca  | accggtggaa |
| 12541 | ttgttatagc  | aggattatgt  | aaaaaagata  | aacaaggaaa  | tcctcaatat  | tcagccaatg |
| 12601 | athtagtcga  | gctttaccaa  | aaatacgggt  | catataat    | taagtcttca  | ttcttccggc |
| 12661 | gatcaatatt  | atcttggttt  | aactgtgcac  | aatacccaca  | taaaaaatatt | gaatttgtac |
| 12721 | tggataaata  | ttttggtgat  | gatactttac  | aaagcacctt  | aaataatgta  | ctgattgcaa |
| 12781 | gttacgat    | taacaataat  | tgtccat     | tcttcaaaag  | ctggaaagaa  | ggtaatatta |
| 12841 | agctgaaaga  | tgcactcaga  | gctgcaacgg  | ctgcacctac  | ttattttcata | ccaaaacatc |
| 12901 | taaaaattga  | ccagatagac  | agagtattag  | tggatggtgg  | ggtttttgccc | aataatccag |
| 12961 | ctgcttgtgc  | atatgcaagt  | ggtaagaggt  | tattttccaaa | tgatgatatt  | ctactgttat |

```

13021 cgataggtac tggagaaca gatagaagca tagagtatgc caattcaaag agatttggaa
13081 aaataggatg gataaaacct ttgttaaagt tgatgtttgc ctctggactg gactgcgtaa
13141 attatcagat gaatcaagta ataggcaata gatacgtaag aatacaatcg caattgaagc
13201 tagcgctcggc tgacatggat aacattacat caaaaaatat caaatctctt cagcaagaag
13261 caaaggcaat gatagaggac aatcagaaaag cgatagagaa attctgtata gaagtattaa
13321 atatataact atttttactt atatcttaaa cacattcaat ttccacactc acccaactca
13381 tcagcagtta ggccacttgc tcgcaaaata acatcagtag aaacacccgc cttcactaga
13441 tttttcgcaa ccttaatctt ttctgttttt ttaactttct ctttgctatt cttcatatcc
13501 ctagataaaa atttcttcac taattcttgc tcttcagttt ttcttagtaa attaagtagt
13561 tcactatctt catttgtttt aggtagcaga actttaatat tcactgataa tccttctgct
13621 atttgatata atttatcaaa tgatatggca gtgtatccta ttccatactc gtgtatttcc
13681 ttgagtgtta aaccaacttt gtttgctaaa tctttctgag tatacctttt tatcaatctc
13741 cattctctta ttctttgccc tattctgtaa tatatagaat cagtgcagat ttctctctct
13801 gtattatcat actcgtaaag agataagccg gttgcctggg aaattatgtc aactgaaact
13861 ccttctttca ctagattttt tgctatttcc aacctgacct cttcttgatt aattttttcg
13921 ctaatatgaa caaacctgac taatgaaggt actattttgc ctaacttttg attctcatat
13981 attttcgtta gatagagtat ttctctgtct tcatagctgt cttcccttac tattactggg
14041 tcgggtaata aatctatagc attaactgac aatactcttg ctattacata tagtacttca
14101 attggaatag gaatataccc attttcatag ctgtttactt cttgggtatgt taaacctatt
14161 tcacttgcca attctacttg agtatgccct cgcattaacc tgctatcttc tattttttgt
14221 cctattttgt agcttataga actaatatcg cttacagaaa caaacatata taccttactt
14281 agaaataaat ttcatgcaa ttgatcaac ggataaaccg attatttgca aaataatatt
14341 aatagaaatt ccccttttta ctaaactcct tgcaacttta atcctttcta tctctctcac
14401 tttctcctca caaatccgta tcccttcaaa caaagacttt attagtgcac gccgtagttc
14461 ttggctctca atttctttgt attctttaat caaatcaggt agctcatttt tcactttact
14521 cccttcctct attagtagat ccgtaatat aatcgataat gcttctgcca ttcatataa
14581 tttatcaagt ggaacagcag tccttccttg ctcatagttg cttatttcgt cacgtgttgt
14641 actcattttt tctactaaat ctttttgagt atactctctc actagcctcc attcttttat
14701 cttctttcct atttggcagt aaatagaacc tcctttttct tcaacgcatt catcagcaga
14761 gaggccaatt gtttttgcaa caatatcaac agaaactcct gctttaacca aaccttttgc
14821 aatctttatt ttctctgctt ttttactact tttttcacta acttggaaca aattggtag
14881 taaacaaaac atcttacgta actcctgggc attaatcttt ttatattctc ttactagatt
14941 taagatttct tctccctcat cttcaagaca gctttttgat ataggaatta gatccgtaat
15001 actgattgat agtgcctcag ttatagcata taacctttca attgaaattc g

```

```

//
LOCUS      JAQZAU010000155                62512 bp    dna        linear    ENV 17-MAR-2023
DEFINITION MAG: Wolbachia pipientis isolate wEsol contig_41019, whole genome
            shotgun sequence.
ACCESSION  JAQZAU010000155  JAQZAU010000000
VERSION    JAQZAU010000155.1
DBLINK     BioProject: PRJNA929258
            BioSample: SAMN33142973
KEYWORDS   WGS; ENV; Metagenome Assembled Genome; MAG.
SOURCE     Wolbachia pipientis (insect metagenome)
ORGANISM   Wolbachia pipientis
            Bacteria; Pseudomonadota; Alphaproteobacteria; Rickettsiales;
            Anaplasmataceae; Wolbachieae; Wolbachia.
REFERENCE  1 (bases 1 to 62512)
AUTHORS    Fiutek,N., Couger,B.M., Roy,S., de la Torre,J.R. and Connor,E.F.
TITLE      Genomic assessment of the contribution of the Wolbachia
            endosymbiont of Eurosta solidaginis to gall-induction
JOURNAL    International Journal Molecular Sciences
REFERENCE  2 (bases 1 to 62512)
AUTHORS    Fiutek,N., Couger,B.M., Roy,S., de la Torre,J.R. and Connor,E.F.
TITLE      Direct Submission
JOURNAL    Submitted (10-FEB-2023) Biology, San Francisco State University,
            1600 Holloway Ave, San Francisco, CA 94132, USA
COMMENT    ##Genome-Assembly-Data-START##
            Assembly Date      :: JUN-2019
            Assembly Method    :: FLYE v. 06-2019

```

Genome Representation :: Full  
Expected Final Version :: Yes  
Genome Coverage :: 100.0x  
Sequencing Technology :: Illumina HiSeq; PacBio Sequel  
##Genome-Assembly-Data-END##

FEATURES  
source Location/Qualifiers  
1..62512  
/organism="Wolbachia pipientis"  
/mol\_type="genomic DNA"  
/submitter\_seqid="contig\_41019"  
/isolate="wEsol"  
/isolation\_source="galls on Solidago altissima"  
/host="Eurosta solidaginis MN-2018-EFC"  
/db\_xref="taxon:955"  
/environmental\_sample  
/country="USA: Cowling Arboretum, Carleton College,  
Northfield, MN"  
/lat\_lon="44.48 N 93.13 W"  
/altitude="280 m"  
/collection\_date="2018-11"  
/metagenome\_source="insect metagenome"  
/note="metagenomic"  
gene complement(60..3422)  
/locus\_tag="wEsol\_01744"  
CDS complement(60..3422)  
/locus\_tag="wEsol\_01744"  
/codon\_start=1  
/transl\_table=11  
/fullproduct="qcoverage 99.0178571428572 , hcoverage 100  
, similarity 100 , identity 100 , evalue 0.0 , alnlength  
1109 , Bacteria , Proteobacteria , WP\_015589199.1  
MULTISPECIES: DNA polymerase III subunit alpha  
[unclassified Wolbachia]"  
/cog="DnaE COG0587 1139 DNA polymerase III, alpha  
subunit"  
/pfam="PHP Peptidase\_C50 DNA\_pol3\_alpha"  
/tigr="TIGR00594 polc 1022 DNA polymerase III, alpha  
subunit"  
/product="DNA polymerase III  
subunit alpha"  
/translation="MLSFFVDLKFLMFIHLRVHSVYSLLESSVKIEELIGLCLRNKMP  
AVAITDSGNLFGSLEFAEYAAASRGIQLIIGCNIIVKHSEQNLPIILLAKNEQGYTNLV  
TLVSESEFRKRKNNSDIPYVDFDELLNLSTGLIALTGGCLAQLLLQGDKETVEKLLSAF  
NGHLYVELQRHGLSKELELEETLIDFAYQHNIPLVATNDVFFTNRSDEAYDILTCS  
EGSYALENNRKKLTSEHYFKSVAEMEELFSDIPEAIHNTLVIKRCSYMPRSRQPILP  
KFPCRENKTENEELREQAVAGLEFRITNETDIDLKQYYDRLNYELSVITSMNYSYFL  
IVSDFIRWSKANGIPVGPGRGSGAGSIVAWGLQITDLDPKFKGLIFERFLNPDRVSM  
DFDIDFCQEKRDLDIVYVQKKYGYVAQIITFGKLQARAVLRDVGRLVQMPYSQVDKIS  
KMVPFNPVNPVTLTSLQAIEFDQNLQKERDSDEVIKLLDISLKLEGIYRHVSTHAAGIV  
ICDQKLENFVPVYDNPNSALPITQYSMKYVEKAGLIKFDLGLGLTLTIDHVCRLINR  
DGKKIDISSVPLNDQKTYEILSSGDSIGVFQLESSGMREALIKLPDCIEDIIALISL  
YRPGMDNIPTYVARKHGLEKPDYIHPLLEEVLKETFGVIIYQEQVMEIARILSGYSL  
AEADLLRRAMGKKIKEEMDKQRELFVQGATKNGVDYDRASYIFDLVAKFAGYGFNKSH  
AAAYAVISYQTAYLKANYPLEFFTALMNLNIDDRKLNLFYHAAKFSGVTVLPPDINK  
SKAEFSIENERIRYGIAALRNVGFSIAEGIVNVRSSACKDIWEFTIQNSGHIINKRALE  
SLIKSGAFDSVHKNRQLYESMDTLIYFANKNKQDRESSQAALFGSLDVLKPKLENVE  
DFDEEKKLEHELFSLGFYLTNHPLEKFRILLEKLNIGFIGENRTAKTAGVILNARMRT  
SERGRFVILTSLDPHNVSEIAFYNNIEEKRDLFSPGTFVIIDLEASENTTRLGKD  
ISEFTKRIASTIKELVLTTECTDSQKAAMELNAILKDEGRTKIMLRLLLEKHKVSILL  
PGAYSIAPQVMYEISNLVSWIKGVEINTNNLLI"

```

/besthit="qcoverage 99.0178571428572 , hcoverage 100 ,
similarity 100 , identity 100 , evaluate 0.0 , alnlength
1109 , Bacteria , Proteobacteria , WP_015589199.1
MULTISPECIES: DNA polymerase III subunit alpha
[unclassified Wolbachia]"
gene complement(4195..5517)
/locus_tag="wEsol_01745"
CDS complement(4195..5517)
/locus_tag="wEsol_01745"
/codon_start=1
/transl_table=11
/fullproduct="qcoverage 100 , hcoverage 100 , similarity
100 , identity 100 , evaluate 0.0 , alnlength 440 ,
Bacteria , Proteobacteria , WP_015589198.1 MULTISPECIES:
glutamate--tRNA ligase [unclassified Wolbachia]"
/cog="GlnS COG0008 472 Glutamyl- and glutaminyl-tRNA
synthetases"
/pfam="tRNA-synt_1c Pfam-B_854 Pfam-B_1171"
/tigr="TIGR00464 gltX_bact 470 glutamate--tRNA ligase"
/product="glutamate--tRNA
ligase"
/translation="MLTRFAPSPTGYLHVGNVRTALVCWMYTRNQNGKFLLRFD
DSDL
QRSDVKYINDIIQDLKWIGINWDASFKQSERFERYNVFLQLIKEGHIYACYETREEL
DIKRKLQLKQGLPPVYDRSALLLLEQEKISYEQEGRRPHFRFKLDRNEVVKWNDEVKG
EINIATSSISDPVVKREDGIYTYMLPSVIDDVDFNVTHVVRGEDHVTNTAVQLQMIKA
LKAKIPTFAHLSLLHFDDSKISKRAGVLDIKSIKEDIIEPMALVSYLVKLGTSPNPIEA
CACMQSLIDSFNIKKFSSASVQFSLSEIYKLNKSVLQQMPFEMVQDRLNQIGVDSSEF
WYFIRNNIERFSEVAKWWKICKSDIEPVLIDKELIKIAFNALPQGDCNENTLSEWVKT
IRQTVDIKAKNLFTQLRSALTGTETGPELAKLLIFIGKENIIRLKEK"
/besthit="qcoverage 100 , hcoverage 100 , similarity 100
, identity 100 , evaluate 0.0 , alnlength 440 , Bacteria ,
Proteobacteria , WP_015589198.1 MULTISPECIES:
glutamate--tRNA ligase [unclassified Wolbachia]"
gene 5732..6820
/locus_tag="wEsol_01746"
CDS 5732..6820
/locus_tag="wEsol_01746"
/codon_start=1
/transl_table=11
/product="hypothetical protein"
/pfam="DNA_ligase_aden DNA_ligase_OB"
/tigr="TIGR00575 dnlj 652 DNA ligase, NAD-dependent"
/translation="MTNLEKMREKLQDQINYHNVLYHQKNKPEISDAEYDELKKKLAE
IEPEIYATQDSVGAPPDERFSKVEHQEPMLSLENAYDEQGVEKFLSKIKRFLIEDKIE
ILCEPKIDGLSFSAIYEDGRFVKAATRGGFVGEDVTHNVATIKGFPKFLQGVQGRLE
VRGEIYIGNSDFLKLNENDEFANPRNAAAGSLKQLDANITASRPLRYFAYSLIGGAEK
SQSEVLNKLALGFCVNEHQSLTSSLDGMLKFYNEVYNCRYNLDYDIDGIVYKVN
DLV
LQNRLLGNTHKAPRSALAYKFSAVYAKTKLNKIFIQVGRGTGVLTPVADLV
PVNVGGVLV
SRASLHNQDEIKRKDIREGDIVTIKRAK"
/cog="Lig COG0272 667 NAD-dependent DNA ligase (contains
BRCT domain type II)"
/besthit="qcoverage 100 , hcoverage 54.6827794561934 ,
similarity 100 , identity 99.7 , evaluate 9.50e-252 ,
alnlength 362 , Bacteria , Proteobacteria ,
WP_182319486.1 NAD-dependent DNA ligase LigA [Wolbachia
pipientis]"
gene 6882..7598
/locus_tag="wEsol_01747"
CDS 6882..7598
/locus_tag="wEsol_01747"

```

```

/codon_start=1
/transl_table=11
/product="hypothetical protein"
/pfam="DNA_ligase_ZBD zf-NADH-PPase HHH_2"
/tigr="TIGR00575 dnlj 652 DNA ligase, NAD-dependent"
/translation="MFPEVCPECgSKVRQVEGEAAVRCPEEFACKAQIIEKLKHFVSK
DAFDIVGLGDKQIEFFYDLGLIKQIPDIFTLEERLDEFNLEEQSGWGKKSIAHLLNAI
QSRRVITLDRFIFSLGIRFIGQVAAELLADYYVSYNNWYNSMIELSSDNTELVSIDGI
GKKVAESLESFFSKEHNIKMLNDLTACLQILPVSSNSSNSVLNNKIIVFTGKLLAMSR
GEAKVRAKTLGSKGQLTSFC"
/cog="Lig COG0272 667 NAD-dependent DNA ligase (contains
BRCT domain type II)"
/besthit="qcoverage 97.0588235294118 , hcoverage
45.4724409448819 , similarity 99.6 , identity 98.3 ,
evaluate 2.71e-154 , alnlength 231 , Bacteria ,
Proteobacteria , WP_006279370.1 NAD-dependent DNA ligase
LigA, partial [Wolbachia endosymbiont of Muscidifurax
uniraptor]"
gene complement(7761..8549)
/locus_tag="wEsol_01748"
CDS complement(7761..8549)
/locus_tag="wEsol_01748"
/codon_start=1
/transl_table=11
/fullproduct="qcoverage 100 , hcoverage 89.419795221843 ,
similarity 99.6 , identity 99.6 , evaluate 1.26e-190 ,
alnlength 262 , Bacteria , Proteobacteria ,
WP_155969079.1 MULTISPECIES:
4-hydroxy-tetrahydrodipicolinate synthase [Wolbachia]"
/cog="DapA COG0329 299 Dihydrodipicolinate
synthase/N-acetylneuraminate lyase"
/pfam="DHDPS"
/tigr="TIGR00674 dapA 286 dihydrodipicolinate synthase"
/product="
4-hydroxy-tetrahydrodipicolinate synthase"
/translation="MQVKAENGVVLLGSTGESLSLTDSEKRTLVEFVCKLKLNTKIII
GVPGVNLYQTLEWLDfCKGMPIHGylMTTPiYAKPGIMGQTLWFEKLLEKAHVpAMFY
NIPSRAGVSLHAETVRNLSsHEKFwAIKDSSSGTVDTLTQYKKVAPNIEVFCGDDNMIS
DMAAYGEAGLVsVAANVWPRIaHEYVKKCLNGRNPQADIWQQACEALFIASNPiPTKA
LLHDIGLIEHQTVRLPLSTEDLPSVEKLRQVNKMILGWKELATL"
/besthit="qcoverage 100 , hcoverage 89.419795221843 ,
similarity 99.6 , identity 99.6 , evaluate 1.26e-190 ,
alnlength 262 , Bacteria , Proteobacteria ,
WP_155969079.1 MULTISPECIES:
4-hydroxy-tetrahydrodipicolinate synthase [Wolbachia]"
gene complement(8652..9134)
/locus_tag="wEsol_01749"
CDS complement(8652..9134)
/locus_tag="wEsol_01749"
/codon_start=1
/transl_table=11
/fullproduct="qcoverage 100 , hcoverage 100 , similarity
100 , identity 100 , evaluate 1.97e-109 , alnlength 160 ,
Bacteria , Proteobacteria , WP_155969077.1 MULTISPECIES:
single-stranded DNA-binding protein [Wolbachia]"
/cog="Ssb COG0629 167 Single-stranded DNA-binding
protein"
/pfam="SSB Pfam-B_10642"
/tigr="TIGR00621 ssb 166 single-stranded DNA-binding
protein"

```

```

/product="single-stranded
DNA-binding protein"
/translation="MSGGTINKVILVGNLGDPEIRTTQNGKEMASFSIATSESWTDK
LSGMRSEKTEWHNIVIFSEGLVKIVKDFARKGSKVYVEGSLRTRKWTDQNGGERYTTE
VVLYNFNSALTLLDSRNSAPNPDYKPSEYKQGETGQKDKHESFDNDIKDELDDDEIPF
"
/besthit="qcoverage 100 , hcoverage 100 , similarity 100
, identity 100 , evalue 1.97e-109 , alnlength 160 ,
Bacteria , Proteobacteria , WP_155969077.1 MULTISPECIES:
single-stranded DNA-binding protein [Wolbachia]"
gene complement(9289..10104)
/locus_tag="wEsol_01750"
CDS complement(9289..10104)
/locus_tag="wEsol_01750"
/codon_start=1
/transl_table=11
/fullproduct="qcoverage 100 , hcoverage 100 , similarity
100 , identity 100 , evalue 3.74e-196 , alnlength 271 ,
Bacteria , Proteobacteria , WP_010082449.1 MULTISPECIES:
hypothetical protein [Wolbachia]"
/translation="MNIKLFFIFTLLISNVNAYCSCEDIIESIEICKEYSCRQYIGNE
DFIEHKILGLNSGNLCVYIEKQGNDEMVCCHHSQYGMIEKRYFESILKVGNGEIDDFI
DIANLRAKECFFINNQKLSYTDREDDIREAVESDFDVLVSQYSNVKSIFDEEPVNRMV
NEMEKFNLRSSRAAKEEVSDNFNGKVVSLLDSILYLSPDTWKIWNVNGKLFINTKDLKVH
SVTENYVTFVWTVQKAIKKHANDSQNVYFGYGSIMFTLYPKQKFDLDGLSIK"
/product="hypothetical protein"
/besthit="qcoverage 100 , hcoverage 100 , similarity 100
, identity 100 , evalue 3.74e-196 , alnlength 271 ,
Bacteria , Proteobacteria , WP_010082449.1 MULTISPECIES:
hypothetical protein [Wolbachia]"
gene complement(10109..10717)
/locus_tag="wEsol_01751"
CDS complement(10109..10717)
/locus_tag="wEsol_01751"
/codon_start=1
/transl_table=11
/fullproduct="qcoverage 100 , hcoverage 100 , similarity
100 , identity 100 , evalue 1.58e-131 , alnlength 202 ,
Bacteria , Proteobacteria , WP_015589194.1 MULTISPECIES:
hypothetical protein [Wolbachia]"
/translation="MTISQLKRKATIQFISYLLLSVGLIGLLTYVVIYNEKIYNKNQI
AIDKIRSINLQITGIQKKEVVLNKNLDLWKKISSSNLHSSRYIANLNFELSKLYKKHY
ILEPEISISIPPEEVELHNKSERTKVIKSEVVLNLSSISDKHIFLFLQSIPNLPGYVMI
KSLILNKQRNIDAATMNQILNGNMIEIVRANIVFDWYTILSR"
/product="hypothetical protein"
/besthit="qcoverage 100 , hcoverage 100 , similarity 100
, identity 100 , evalue 1.58e-131 , alnlength 202 ,
Bacteria , Proteobacteria , WP_015589194.1 MULTISPECIES:
hypothetical protein [Wolbachia]"
gene complement(10722..12161)
/locus_tag="wEsol_01752"
CDS complement(10722..12161)
/locus_tag="wEsol_01752"
/codon_start=1
/transl_table=11
/pfam="Pfam-B_12166"
/fullproduct="qcoverage 100 , hcoverage 98.559670781893 ,
similarity 100 , identity 100 , evalue 0.0 , alnlength
479 , Bacteria , Proteobacteria , QGT16439.1 hypothetical
protein E0495_04315 [Wolbachia pipientis]"

```

```

/translation="MFSSKSKSKFMLSIGEEGIMLLYFKNNTLNKRYFVKGKNDKAVS
DLISCLSSDKKAPLYLVLNHADQNYSLQFITRANKISAYLSAKTKMEHFSRNNDISSV
FLVEKPNKFNQNCYLLVSSKAKHLVEYWLNVFIEIGSNFKGILMFPIEISNITKKIL
HKDPNNWKIIVAATKTGGYRQVVLKENKMFVTRLTSTNDNLPGLIAGGIYQEVQDTI
RSLTKFGFEKNNPIDLCIIVSEDIKASLSVINFSNSVNILTPYELGKLLGAELAISE
KDNFCDTIILFHSFKNKLAIFNTKETKEFYLFNYLYLNSPRIFLYFALVLVITNTLC
LLNLYSNFNVADNLSAKQNTLNNQLTKLSQSYNVKKIDEIYDFININNILSKIEYSPL
TQVKYVEKLKIPGIELRSFEWNYNEAKSYITTTLKFNFSQSGKNISHQHEKLRKNLNDN
FRTYDINISSLPAAKEQNLSDVEIGEAM"
/product="hypothetical protein"
/besthit="qcoverage 100 , hcoverage 98.559670781893 ,
similarity 100 , identity 100 , evaluate 0.0 , alnlength
479 , Bacteria , Proteobacteria , QGT16439.1 hypothetical
protein E0495_04315 [Wolbachia pipientis]"
gene complement(12628..14373)
/locus_tag="wEsol_01753"
CDS complement(12628..14373)
/locus_tag="wEsol_01753"
/codon_start=1
/transl_table=11
/fullproduct="qcoverage 100 , hcoverage 100 , similarity
100 , identity 100 , evaluate 0.0 , alnlength 581 ,
Bacteria , Proteobacteria , WP_015589192.1 MULTISPECIES:
type I secretion system permease/ATPase [Wolbachia]"
/cog="ArpD COG4618 580 ABC-type protease/lipase transport
system, ATPase and permease components"
/pfam="Pfam-B_4696 ABC_membrane SMC_N ABC_tran AAA_21"
/tigr="TIGR01842 type_I_sec_PrtD 544 type I secretion
system ATPase"
/product="type I secretion
system permease/ATPase"
/translation="MEITPSIKKELKQSTLYVCLEKCKSAFWFIFWFSAGINLLMLFL
PLYTSQVLDRVISSESVSTLTMLTIIITLSAFACSAMLETCRYLAMAKIGDWIDKTATP
DLIVRSIRLTSVQSSTSSGEAIRD LGVIKNFITGNGIFSLFDTPWSLIYLVVIFMIHT
STGFIAITGIIILVSMAIWNE LATKRILQETNEETIRNINAIDVATRNAEVVEAMGMS
EFIVSDWCKRNDQNRAMQIKAQNRSNVITGITKFLRSTLQISVIGTGALLAITAHKTA
GSIIAASILMGRVLAPFDAAVHTWKFLNQARMSYGR LQRLILTSPKREQTMALPEPEG
KLEFDRVFFTPYGSNKPTVKGISFIIDPGDVVG VIGASASGKSTIAKLTVG VWKPISG
VVRLDGADVYTWNRENFGNYVGYLPQDIELFNTSVKANIARMRDPNP EEI IKA KIA
GIHELILSLPNGYDTTIGGPGGVTLSSGGQKQLLGLARAFYGH TKLLVLDEPNANLDSN
GEACLINAIGIARKQNTTTVIIITHKLP LLSVVDKVILMSDGV IYAMGPKDEILSKLVA
PSSSTTEDERSSANG"
/besthit="qcoverage 100 , hcoverage 100 , similarity 100
, identity 100 , evaluate 0.0 , alnlength 581 , Bacteria ,
Proteobacteria , WP_015589192.1 MULTISPECIES: type I
secretion system permease/ATPase [Wolbachia]"
gene complement(15064..15855)
/locus_tag="wEsol_01754"
CDS complement(15064..15855)
/locus_tag="wEsol_01754"
/codon_start=1
/transl_table=11
/fullproduct="qcoverage 100 , hcoverage 100 , similarity
100 , identity 100 , evaluate 2.94e-189 , alnlength 263 ,
Bacteria , Proteobacteria , WP_015589191.1 MULTISPECIES:
prolipoprotein diacylglyceryl transferase [unclassified
Wolbachia]"
/cog="Lgt COG0682 287 Prolipoprotein
diacylglyceryltransferase"
/pfam="LGT"

```

```

/tigr="TIGR00544 lgt 280 prolipoprotein diacylglyceryl
transferase"
/product="prolipoprotein
diacylglyceryl transferase"
/translation="MSLNPVIFSIGPVSIYWYSLAYVLGIVFAYWYLHRLDDQKIFTK
NFYDSLTTATIIGIILGGRLGYVLIYDPVLYISNPPIELKTWEGGMSFHGGAIGVLLA
VIISCRRHNIPIFYALDLVSCGVPIGLFLGRIGNFINGELFGRVTTMPWGMVFPESGD
NLLHHPSQLYEALFEGLLLFAVANS�FFLTRIRLYHGALTGIAVMWYGIARFFVEFFR
EPDYQIGYLWLDLTMGQLLSIPMVLLGMLVYLGA NLKFNTKSVT"
/besthit="qcoverage 100 , hcoverage 100 , similarity 100
, identity 100 , evalue 2.94e-189 , alnlength 263 ,
Bacteria , Proteobacteria , WP_015589191.1 MULTISPECIES:
prolipoprotein diacylglyceryl transferase [unclassified
Wolbachia]"
gene complement(15862..16311)
/locus_tag="wEsol_01755"
CDS complement(15862..16311)
/locus_tag="wEsol_01755"
/codon_start=1
/transl_table=11
/fullproduct="qcoverage 100 , hcoverage 100 , similarity
100 , identity 100 , evalue 2.17e-94 , alnlength 149 ,
Bacteria;Eukaryota , Proteobacteria;Arthropoda ,
WP_007548863.1 MULTISPECIES: SsrA-binding protein SmpB
[Wolbachia]"
/cog="SmpB COG0691 153 tmRNA-binding protein"
/pfam="SmpB Pfam-B_14786 Pfam-B_3612"
/tigr="TIGR00086 smpB 144 SsrA-binding protein"
/product="SsrA-binding
protein SmpB"
/translation="MEVIAENRKARFEYFILEEFEAGMVLLSSEVKSLRERKVNISDA
YVVEKNSEVWLHNMHIAEYKAANRKNHKPKRERKLLLHKKEINKLIGQIKTAGITVVP
LSVYFNDKGFATKIAIVKGKKLYDKRATIKQREWDREKSRLSKNNL"
/besthit="qcoverage 100 , hcoverage 100 , similarity 100
, identity 100 , evalue 2.17e-94 , alnlength 149 ,
Bacteria;Eukaryota , Proteobacteria;Arthropoda ,
WP_007548863.1 MULTISPECIES: SsrA-binding protein SmpB
[Wolbachia]"
gene complement(16432..18375)
/locus_tag="wEsol_01756"
CDS complement(16432..18375)
/locus_tag="wEsol_01756"
/codon_start=1
/transl_table=11
/pfam="Ank_2 Ank_4 Ank_3 Ank Ank_5 Pfam-B_1714 Ank Ank_3
Ank_4 Ank_2 Ank_5 Ank Ank_3 Ank_4 Pfam-B_1714 Ank_5
Pfam-B_10896 Ank Ank_3 Ank_4 Ank_2 HEM4 Ank Ank_3
Pfam-B_12244 Ank_5 Ank_4 Pfam-B_1714 Ank_4 Ank_5 Ank
Ank_3 Ank_2 Ank Ank_3 Ank_5 Ank_4 Ank_5 Ank_3 Ank Ank_5
Ank_2 Ank Ank_3 Ank_4 Ank_5 Ank_3 Ank Pfam-B_10896 Ank_4
Ank_5 Ank_3 Ank Ank_4 Ank_2 Ank_5 Ank_3 Ank Pfam-B_1714"
/fullproduct="qcoverage 100 , hcoverage 105.374592833876
, similarity 92.6 , identity 92.6 , evalue 1.36e-132 ,
alnlength 647 , Bacteria , Proteobacteria ,
WP_174516988.1 ankyrin repeat domain-containing protein
[Wolbachia endosymbiont of Cardiocondyla obscurior]"
/translation="MLKDITTKLCILSEEVMMKYGKFMEILKKINDLSLDLSDKNIVEKI
KAKLQEEEDPDLQCQEWESKPDNDSGSGINIFTISCGQNSKKVKLLHLASYWNYANVA
KALIENGADINA EHDNKITPLHIAAHYGHEDVVTILTGKGAIVDAKNGDGWTS LHFV
EKNHKNVNTLIGKANVNAENDKGWAPLHLAITNGHKEIVQVLSKAEGINVDKNSD

```

```

GWTSLHLAAANGRKDIVETLIEKGADVNAKDHYKWTPPLTFASQKGHEVVKGALLKAQE
NIKALHSAVKHNNEEEVKNLLNKGVNVNAKDDDGCTPLHLAAREGHKDVVDILIAKGA
KVNAENDDRCTALHLAAENNHIEVVKILVEKADVNAEGIVDETPHLAAREGHKDVVD
ILIKKGAKVNAENDDRCTALHLAAENNHIEVVKILVEKADVNIKDADRWTPLHVAEN
GHEDIVKTLIAKGAKVNAKNGDRRTPLHLAENGKIKVVEVLLHTEADPSLKDVDGKT
PRDLTKYQGIIQLLEEAEEKQTLKNENKKTTPKDLTENKDVMLPEKKEEKQIGKNAIV
KEKEQSAKNAIVKGIIVCFVTAVIVGVALAFATALSVPAIIGLAAGSALIVGAGQYIM
SKPKTEMKEVKELVPRETEKALT"
/product="ankyrin repeat domain-containing
protein"
/besthit="qcoverage 100 , hcoverage 105.374592833876 ,
similarity 92.6 , identity 92.6 , evalue 1.36e-132 ,
alnlength 647 , Bacteria , Proteobacteria ,
WP_174516988.1 ankyrin repeat domain-containing protein
[Wolbachia endosymbiont of Cardiocondyla obscurior]"
gene 18444..18974
/locus_tag="wEsol_01757"
CDS 18444..18974
/locus_tag="wEsol_01757"
/codon_start=1
/transl_table=11
/fullproduct="qcoverage 100 , hcoverage 100 , similarity
100 , identity 100 , evalue 5.04e-113 , alnlength 176 ,
Bacteria , Proteobacteria , WP_010962821.1 MULTISPECIES:
Na+/H+ antiporter subunit E [Wolbachia]"
/cog="MnhE COG1863 158 Multisubunit Na+/H+ antiporter,
MnhE subunit"
/pfam="MNHE"
/tigr="TIGR00942 2a6301s05 144 multicomponent Na+:H+
antiporter"
/product="Na+/H+ antiporter
subunit E"
/translation="MKNLNFRKEIKFFSLSFIILFVLWTVLSGYFEPFFIFCGVFSSI
FTSFIFRRLINAERALSQILNSTSRLSFYKLVSYIPWLMYQIILSSVYVTKKVLQLKS
KLEPIIILRKCKGHNDESIALFANSVTITPGTLTINVESKQKTYFSTMYLIDKDLESG
ISEIENKILKILRSVK"
/besthit="qcoverage 100 , hcoverage 100 , similarity 100
, identity 100 , evalue 5.04e-113 , alnlength 176 ,
Bacteria , Proteobacteria , WP_010962821.1 MULTISPECIES:
Na+/H+ antiporter subunit E [Wolbachia]"
gene complement(18967..19383)
/locus_tag="wEsol_01758"
CDS complement(18967..19383)
/locus_tag="wEsol_01758"
/codon_start=1
/transl_table=11
/pfam="Pfam-B_19244 Pfam-B_16844"
/fullproduct="qcoverage 100 , hcoverage 100 , similarity
100 , identity 100 , evalue 9.15e-93 , alnlength 138 ,
Bacteria , Proteobacteria , WP_006279382.1 MULTISPECIES:
hypothetical protein [Wolbachia]"
/translation="MSKLPNNAKIGKSQVTQWEVIKNCEYADNCLSKIIVTLYVIRITQ
LSDFYTSDEPEINTVLARISVTSENVFLNKATTIEVMEGIFPYKFNSKKRNNILRLED
LYNYLCSIVNNSLPKEMLESLVREYKDAVNLFKAIT"
/product="hypothetical protein"
/besthit="qcoverage 100 , hcoverage 100 , similarity 100
, identity 100 , evalue 9.15e-93 , alnlength 138 ,
Bacteria , Proteobacteria , WP_006279382.1 MULTISPECIES:
hypothetical protein [Wolbachia]"
gene 19688..20248

```

|      |                                                                                                                                                                                                                                                                                                                                                                                                                                                                                                                                                                                                                                                                                                                                                                                                                                                                                                                                                                                                                                                                                                                                                                                                                                                         |
|------|---------------------------------------------------------------------------------------------------------------------------------------------------------------------------------------------------------------------------------------------------------------------------------------------------------------------------------------------------------------------------------------------------------------------------------------------------------------------------------------------------------------------------------------------------------------------------------------------------------------------------------------------------------------------------------------------------------------------------------------------------------------------------------------------------------------------------------------------------------------------------------------------------------------------------------------------------------------------------------------------------------------------------------------------------------------------------------------------------------------------------------------------------------------------------------------------------------------------------------------------------------|
| CDS  | <pre> /locus_tag="wEsol_01759" 19688..20248 /locus_tag="wEsol_01759" /codon_start=1 /transl_table=11 /fullproduct="qcoverage 100 , hcoverage 100 , similarity 100 , identity 100 , evaluate 3.38e-125 , alnlength 186 , Bacteria , Proteobacteria , WP_015589189.1 MULTISPECIES: phosphoribosylglycinamide formyltransferase [unclassified Wolbachia]" /cog="PurN COG0299 200 Folate-dependent phosphoribosylglycinamide formyltransferase PurN" /pfam="Formyl_trans_N" /tigr="TIGR00639 PurN 192 phosphoribosylglycinamide formyltransferase" /product=" phosphoribosylglycinamide formyltransferase" /translation="MKKIKLGILISGRGSNMQALIEACQDQNFSAEVACVITNNSEAA GLKIAEQAGISAFIVKDKPLDAGKIHEILVQHKVDLICLAGFMRILKADFLSKWHNKV INIHPSLLPSFKGLNAQEQALKAGVKITGCTVHYVTPEVDAGAIQAQVVPVLPADDI QSLSERILAKEHKCYVEAVRSIAEDI" /besthit="qcoverage 100 , hcoverage 100 , similarity 100 , identity 100 , evaluate 3.38e-125 , alnlength 186 , Bacteria , Proteobacteria , WP_015589189.1 MULTISPECIES: phosphoribosylglycinamide formyltransferase [unclassified Wolbachia]" </pre>                                                                                                                                                                                 |
| gene | <pre> complement(20258..21562) </pre>                                                                                                                                                                                                                                                                                                                                                                                                                                                                                                                                                                                                                                                                                                                                                                                                                                                                                                                                                                                                                                                                                                                                                                                                                   |
| CDS  | <pre> /locus_tag="wEsol_01760" complement(20258..21562) /locus_tag="wEsol_01760" /codon_start=1 /transl_table=11 /fullproduct="qcoverage 99.0783410138249 , hcoverage 97.9498861047836 , similarity 100 , identity 100 , evaluate 7.87e-302 , alnlength 430 , Bacteria , Proteobacteria , WP_015589188.1 MULTISPECIES: insulinase family protein [unclassified Wolbachia]" /cog="PqqL COG0612 438 Predicted Zn-dependent peptidases" /pfam="Peptidase_M16 Peptidase_M16_C" /product="insulinase family protein" /translation="MYFCFFFCLSFNLQASGSLNIEEVTTTRKGFKFLFVENCALPKVS LNISFKDAGYVYENAEKQGLTWFTSLIIQEGAGKNDKDFAKKLEDKGISLNFADLE AFRVSLNTLSDNLEEAIISLLSDTIMRPKVDPEGLNRVFEKAKVNFNNLEKSPYFVAGK ELDTLLFKKHPYSKSVYGTLDTIMNITRDDVLTYYIKRNFADKNIVISVAGCAKKEEII TLLDKYLSKLPSKRSKVRKIPVKNNFGSAESKNIFMDIPQSVILFAQKGIAYEDPNYY NAGVLIDALGGMRLNSILMTELRLQNLGITYGVYASIIISNKHGNIISGFISTDSSTAGK AISAVKDTFSRIKKQGIDEQLFKDAKIGLVNNLVFLSNNTNTATLLDNMQINDRDVN RINNYANIINDVKLEEVNELASSLLEPENLFFVEVGKNAQQQ" /besthit="qcoverage 99.0783410138249 , hcoverage 97.9498861047836 , similarity 100 , identity 100 , evaluate 7.87e-302 , alnlength 430 , Bacteria , Proteobacteria , WP_015589188.1 MULTISPECIES: insulinase family protein [unclassified Wolbachia]" </pre> |
| gene | <pre> complement(21565..22788) </pre>                                                                                                                                                                                                                                                                                                                                                                                                                                                                                                                                                                                                                                                                                                                                                                                                                                                                                                                                                                                                                                                                                                                                                                                                                   |
| CDS  | <pre> /locus_tag="wEsol_01761" complement(21565..22788) /locus_tag="wEsol_01761" /codon_start=1 /transl_table=11 </pre>                                                                                                                                                                                                                                                                                                                                                                                                                                                                                                                                                                                                                                                                                                                                                                                                                                                                                                                                                                                                                                                                                                                                 |

```

/fullproduct="qcoverage 100 , hcoverage 100 , similarity
100 , identity 100 , evalue 5.93e-298 , alnlength 407 ,
Bacteria , Proteobacteria , WP_015589187.1 insulinase
family protein [Wolbachia endosymbiont of Drosophila
simulans]"
/cog="PqqL COG0612 438 Predicted Zn-dependent peptidases"
/pfam="Peptidase_M16 Peptidase_M16_C"
/product="insulinase family protein"
/translation="MDVYIVPNHRIPAVLHAVIYKVGGMDDPIGKAGLAHYFEHLMFE
TTGKFTDIEATMSSIGAQFNAFTTKEYTCYFELIPKDLPLAMEVEADRMGSFNVTQD
KIDREKNIVLEERKMRFDNHPNNLLWEEMNSAFYRTGYGRSVIGWESDIKTYNLDDIT
RFHDNYYHSGNAILLIVGDVELDEVVKLAEEKYGEIKAKPVMRNYPNQDPVHNAGLSV
TLESTEVKEPVLYFRYRVPLFEHINEASAAHLAVEILGGGKSSKLYNDLVLEDDVAVS
VFAYYNSLAFSDGYIDIQVIPKSGVNLDIVERELDNAINNFMSKGITDEELQSSKYRY
KAAQFDNLSDLTHIAMFYVPHLALGIPLDEIDISYSKIDDVNLEDVNNKIRTIFSSNK
LIGRLLPKGDNNENK"
/besthit="qcoverage 100 , hcoverage 100 , similarity 100
, identity 100 , evalue 5.93e-298 , alnlength 407 ,
Bacteria , Proteobacteria , WP_015589187.1 insulinase
family protein [Wolbachia endosymbiont of Drosophila
simulans]"
gene complement(23018..23494)
/locus_tag="wEsol_01762"
CDS complement(23018..23494)
/locus_tag="wEsol_01762"
/codon_start=1
/transl_table=11
/fullproduct="qcoverage 100 , hcoverage 100 , similarity
100 , identity 100 , evalue 2.40e-109 , alnlength 158 ,
Bacteria , Proteobacteria , WP_006279329.1 MULTISPECIES:
signal peptidase II [Wolbachia]"
/cog="LspA COG0597 167 Lipoprotein signal peptidase"
/pfam="Peptidase_A8"
/tigr="TIGR00077 lspA 164 signal peptidase II"
/product="signal peptidase
II"
/translation="MKKLCLVVILIIIVLIDQTSKLYINSLIDEGESIEIASFIKLVEV
WNSGISFGMCSALPHGGFFFSAFSILIIIGILAYLIYKSDDQSTYLGFSLMIGGAIGNV
VDRIYWGAUYDFIYFHIDDWYWPAFNLADLSIVCGMFTLLYKWYIYDMLISKQNEE"
/besthit="qcoverage 100 , hcoverage 100 , similarity 100
, identity 100 , evalue 2.40e-109 , alnlength 158 ,
Bacteria , Proteobacteria , WP_006279329.1 MULTISPECIES:
signal peptidase II [Wolbachia]"
gene complement(23491..24423)
/locus_tag="wEsol_01763"
CDS complement(23491..24423)
/locus_tag="wEsol_01763"
/codon_start=1
/transl_table=11
/fullproduct="qcoverage 100 , hcoverage 100 , similarity
100 , identity 100 , evalue 1.10e-228 , alnlength 310 ,
Bacteria , Proteobacteria , WP_010082493.1 MULTISPECIES:
riboflavin biosynthesis protein RibF [Wolbachia]"
/cog="RibF COG0196 304 FAD synthase"
/pfam="FAD_syn Flavokinase"
/tigr="TIGR00083 ribF 290 riboflavin biosynthesis protein
RibF"
/product="riboflavin
biosynthesis protein RibF"
/translation="MKIIYNCEQGIENNIALTFGNFDGIHLGHEFAISTLKKVAQERG

```

```

LPSAVLTFEPHPSTVLFGRNNFRLIDQEQKKELISSYGIDYLYIINFNRGFSEVSCDD
FISEILIDKYGAKHIIIVGENCTFGHKRLGNILTLEKYSEIYGYSLTKEPLTIDGKIC
SSSSIREYVQRGEIEIANKLLGRPYQVSGVVTGACRGREIGFPTINIPIEDCMIKPK
FGTTYARVTFPDSNPWNLYGVVNIGMRPTFKDLKKPIIEMHIFDFDEDVYSHKVNIQL
LKFIKSEKKFHSIEELTKQINYDILKVYRLKANL"
/besthit="qcoverage 100 , hcoverage 100 , similarity 100
, identity 100 , evalue 1.10e-228 , alnlength 310 ,
Bacteria , Proteobacteria , WP_010082493.1 MULTISPECIES:
riboflavin biosynthesis protein RibF [Wolbachia]"
gene 24484..24822
/locus_tag="wEsol_01764"
CDS 24484..24822
/locus_tag="wEsol_01764"
/codon_start=1
/transl_table=11
/fullproduct="qcoverage 100 , hcoverage 100 , similarity
100 , identity 100 , evalue 1.17e-78 , alnlength 112 ,
Bacteria , Proteobacteria , WP_007550037.1 MULTISPECIES:
glutaredoxin 3 [Wolbachia]"
/pfam="Thioredoxin_3 Pfam-B_14852 Pfam-B_1698
Glutaredoxin DUF836 GST_N_3"
/tigr="TIGR02181 GRX_bact_80 glutaredoxin 3"
/product="glutaredoxin 3"
/translation="MKNVVIYVKKGCPYCIRAKDLLDKKGVKYEEDVLKNSDLFNDI
KSKYNVRTVPQIFINDKHIGGCDKLMLEKEGKLDDMLNNNDNHTDVTTYTNSNDECG
ECVIPHDDFM"
/besthit="qcoverage 100 , hcoverage 100 , similarity 100
, identity 100 , evalue 1.17e-78 , alnlength 112 ,
Bacteria , Proteobacteria , WP_007550037.1 MULTISPECIES:
glutaredoxin 3 [Wolbachia]"
gene 24938..25810
/locus_tag="wEsol_01765"
CDS 24938..25810
/locus_tag="wEsol_01765"
/codon_start=1
/transl_table=11
/fullproduct="qcoverage 100 , hcoverage 100 , similarity
100 , identity 100 , evalue 1.20e-197 , alnlength 290 ,
Bacteria , Proteobacteria , WP_007550039.1 MULTISPECIES:
hypothetical protein [Wolbachia]"
/translation="MTKNISIIISRNLIISIELVNKQDLENFIKIFTVLDKHIAAKTLFT
EEVRIEYKQHNGIEVVELLKDTDFTYHEVENVLNHLKSHGMKVPSSVIAHTLFAAYNH
ALEFKDVAFSFSEGGSPQFNIRVSKNTFIITPMSEENLELNSQSSKKLIESLQSEKNIY
DCIVEENTIKVIVHSEIHQAINLIIKSLIKSRLLAKEEEGKFKEKLRLQAFKDQAFVE
YSSIKTISRYPHNHPLRKHESVTKDIENILCDFIANENSEFAIERLNRLSSAVSPDTP
RIITKTIDKLVKFH"
/product="hypothetical protein"
/besthit="qcoverage 100 , hcoverage 100 , similarity 100
, identity 100 , evalue 1.20e-197 , alnlength 290 ,
Bacteria , Proteobacteria , WP_007550039.1 MULTISPECIES:
hypothetical protein [Wolbachia]"
gene 26404..26640
/locus_tag="wEsol_01766"
CDS 26404..26640
/locus_tag="wEsol_01766"
/codon_start=1
/transl_table=11
/product="hypothetical protein"
/translation="MFMAKRQPSSRYVLAEEIPRMNRGMTVRGGMTITSSSRYLLAGS
RDTANESRYDGSWRYDVEFYTHQLSIPTWIVSYR"

```

```

/besthit="qcoverage 70.5128205128205 , hcoverage
69.620253164557 , similarity 81.8 , identity 76.4 ,
evaluate 3.93e-14 , alnlength 55 , Bacteria ,
Proteobacteria , WP_174515849.1 hypothetical protein,
partial [Wolbachia endosymbiont of Cardiocondyla
obscurior]"
gene 26750..27349
/locus_tag="wEsol_01767"
CDS 26750..27349
/locus_tag="wEsol_01767"
/codon_start=1
/transl_table=11
/fullproduct="qcoverage 100 , hcoverage 100 , similarity
100 , identity 100 , evaluate 7.62e-142 , alnlength 199 ,
Bacteria , Proteobacteria , WP_012673206.1 MULTISPECIES:
peroxiredoxin [Wolbachia]"
/cog="AhpC COG0450 194 Peroxiredoxin"
/pfam="AhpC-TSA Redoxin 1-cysPrx_C"
/tigr="TIGR03137 AhpC 187 peroxiredoxin"
/product="peroxiredoxin"
/translation="MNLVTKSAIDFTASSVLSDGEIVDDFCLSKRIKNKYAVLFFYP
L DFTFVCPTTELISLNNRINEFAKRGVEVIGISVDSKFSHYKWRNTPVNDGGIGEISYTL
VSDIKKSISRDIYGVLYDDSI ALRATFVIDDKFIVRHQSINDLPLGRNIDEFVRIVDAI
KHNEEHGEVCPAGWKKGK PAMQASDEGVADYLN SYSEEL"
/besthit="qcoverage 100 , hcoverage 100 , similarity 100
, identity 100 , evaluate 7.62e-142 , alnlength 199 ,
Bacteria , Proteobacteria , WP_012673206.1 MULTISPECIES:
peroxiredoxin [Wolbachia]"
gene 27336..28274
/locus_tag="wEsol_01768"
CDS 27336..28274
/locus_tag="wEsol_01768"
/codon_start=1
/transl_table=11
/fullproduct="qcoverage 100 , hcoverage 100 , similarity
100 , identity 100 , evaluate 8.60e-218 , alnlength 312 ,
Bacteria , Proteobacteria , WP_015589186.1 MULTISPECIES:
thioredoxin-disulfide reductase [unclassified Wolbachia]"
/cog="TrxB COG0492 305 Thioredoxin reductase"
/pfam="Pyr_redox_2 DAO HI0933_like GIDA FAD_binding_2
FAD_oxidored Pyr_redox_3 Pyr_redox_3 Pfam-B_7606
K_oxygenase Shikimate_DH NAD_binding_7 Pyr_redox"
/tigr="TIGR01292 TRX_reduct 300 thioredoxin-disulfide
reductase"
/product="
thioredoxin-disulfide reductase"
/translation="MKNYKFSTKVLIIIGSGAAGYAAAIYAARANLEPIVVTGMQPGGQ
LTITTDVENYPGFVSIQGPELMEQMRLHAEKVGAKIIDDEIKSVEQLEDSNEYRFRSS
GNINDYYSDAIIIIASGAQAKWLGLESEKKFKQGYGVSACATCDGAFFRNKVVAVIGGN
TAVEEAI FLTRFAKEVILIHRRDKLRAEKVMQDRLFKNDKIKVMWNHTVEQILGEENP
KRVAGIAIKSAETQELKVDGVFIAIGHAPNTGIFKGFVEMDEQGYIITKPGTTLTSRA
GVFAAGDVQDKVYRQAVVAAGTGCMAALDAEKFLES"
/besthit="qcoverage 100 , hcoverage 100 , similarity 100
, identity 100 , evaluate 8.60e-218 , alnlength 312 ,
Bacteria , Proteobacteria , WP_015589186.1 MULTISPECIES:
thioredoxin-disulfide reductase [unclassified Wolbachia]"
gene 28364..28861
/locus_tag="wEsol_01769"
CDS 28364..28861
/locus_tag="wEsol_01769"

```

```

/codon_start=1
/transl_table=11
/product="hypothetical protein"
/pfam="Pfam-B_10896 Ank_2 Ank_4 Ank_5 Ank_4 Ank_2 Ank_5
Ank_3 Ank"
/translation="MPYRNGVACYGAYGGGDNTASQARNPTTSRQLSESTKQLFKAID
DGNLEDFKEALAEGADVNAFDKEGMTPLMSIVTNLSAGSETEKEYQNMIRLLLLHRSI
DVNISEQNNNTVLHLAMCFQQKKTLLQLLSHPNINTYLTNKNHQNPPEECARQNRAGH
LIIEI"
/cog="Arp COG0666 235 FOG: Ankyrin repeat"
/besthit="qcoverage 100 , hcoverage 66.8016194331984 ,
similarity 99.4 , identity 99.4 , evaluate 1.49e-109 ,
alnlength 165 , Bacteria , Proteobacteria ,
WP_007550910.1 ankyrin repeat domain-containing protein,
partial [Wolbachia endosymbiont of Drosophila ananassae]"
gene 28931..29881
/locus_tag="wEsol_01770"
CDS 28931..29881
/locus_tag="wEsol_01770"
/codon_start=1
/transl_table=11
/product="hypothetical protein"
/pfam="PqqD Pfam-B_967"
/translation="MNQELHPNCWRRRTQDGRIKTPLSLIIRLCLRTITETEKEVLTKL
LKHKDLDFSIEQYQALQKQTIEQAIQSRLTDTINRKDLDDVKKLVEDNCFINRAVVTAA
LGGVDNPVNSIKDYLNEKFPANTNNIPEDFEKFLQGLERTKAQLVEKEQELTNKTSKI
SLLERDLGQVRQEKSQKTKINDLNSEVTRLNRIVYGRASDTVEILQLKRDLDKQVREE
RDRLSSENRLRSNKNEKSSQAISGRKLSNYASACFILLGVYTVVACLVIEDYPGII
SAFFTAVALAFFLLGCCNLYKANTILSDVESTQLGGLERS"
/besthit="qcoverage 100 , hcoverage 62.5742574257426 ,
similarity 100 , identity 99.7 , evaluate 2.07e-203 ,
alnlength 316 , Bacteria , Proteobacteria ,
WP_141457017.1 MULTISPECIES: ankyrin repeat
domain-containing protein [unclassified Wolbachia]"
gene complement(29878..30714)
/locus_tag="wEsol_01771"
CDS complement(29878..30714)
/locus_tag="wEsol_01771"
/codon_start=1
/transl_table=11
/fullproduct="qcoverage 100 , hcoverage 94.8805460750853
, similarity 100 , identity 100 , evaluate 5.31e-194 ,
alnlength 278 , Bacteria , Proteobacteria ,
WP_206759924.1 MULTISPECIES: tyrosine-type
recombinase/integrase [unclassified Wolbachia]"
/cog="XerD COG4974 300 Site-specific recombinase XerD"
/pfam="Phage_integr_N Phage_integrase Integrase_1
Pfam-B_1210"
/tigr="TIGR02224 recomb_XerC 295 tyrosine recombinase
XerC"
/product="tyrosine-type
recombinase/integrase"
/translation="MRDLKDLISFLNTHIGGEVNVGTLKNLSIPELRSWLTSRYARGV
NARSNTRALS VIRNFFKYIKNNHNIDNEAVFSLSRPIQRRTLPAKLSIPNIKTLLKEM
KLSDLGEPWVVKREIAIIVLLYGTGLRISEALNLRVSDISSENLIITGKGDKQRQVFI
LPVVKKCIQEYIKACPYLDEAQLHLGLGVRGKKLGRITYVANRLQKIRRMLNLPEILSPH
AFRHSFATHLLQEDIDIRSIQQLLGHSLETQIYTHLNYQDVFNMYKNFQQGLEKKS
KL"
/besthit="qcoverage 100 , hcoverage 94.8805460750853 ,
similarity 100 , identity 100 , evaluate 5.31e-194 ,

```

```

alnlength 278 , Bacteria , Proteobacteria ,
WP_206759924.1 MULTISPECIES: tyrosine-type
recombinase/integrase [unclassified Wolbachia]"
gene complement(30801..32180)
/locus_tag="wEsol_01772"
CDS complement(30801..32180)
/locus_tag="wEsol_01772"
/codon_start=1
/transl_table=11
/fullproduct="qcoverage 100 , hcoverage 100 , similarity
100 , identity 100 , evalue 0.0 , alnlength 459 ,
Bacteria , Proteobacteria , WP_015589183.1 MULTISPECIES:
dihydrolipoyl dehydrogenase [unclassified Wolbachia]"
/cog="Lpd COG1249 454 Pyruvate/2-oxoglutarate
dehydrogenase complex, dihydrolipoamide dehydrogenase
(E3) component, and related enzymes"
/pfam="Thi4 HI0933_like Pyr_redox_2 DAO GIDA FAD_oxidored
FAD_binding_2 Lycopene_cycl Pyr_redox Pyr_redox_3
NAD_binding_8 AlaDh_PNT_C Pyr_redox 3HCDH_N DAO
FAD_binding_3 Mqo HI0933_like Pyr_redox_dim"
/tigr="TIGR01350 lipoamide_DH 461 dihydrolipoyl
dehydrogenase"
/product="dihydrolipoyl
dehydrogenase"
/translation="MTDYDLIVIGGGPGGYKCAIAAAKLGLKVACIDKNSIFGGTCLR
VGCIPSKALLHSSYQYAHTKNDLSKLGIKIKDASFDLKEMLGYKDARVQELGKGIEYL
FNLHKITKINGLASFDQGNLEVSVEGKVLKTKNIVIAATGSDVISLPGINIDEKDISS
TGALSLTEVPKKLVVIGAGAIGLEMSSVWRRLGSEVTVVEFFDRIAAAMDGELSKSL
SSLQKQGIKFLSTKVEEIKQSSNSLSVKVCSVKDNQTNVIEADKVLVAAGRKPCTEN
LGIDEKIEKDNRGFVQVNNRYETNVKGIFAIGDVIGGAMLAHKAEEEGVAVAEIIAGQ
VPHVDYEIIPSVIYTHPAVSSIGKTEEELKSVGRKYKVGKCQFAANGRAKITDDAEGF
VKVLTCRADTILGVHIIIGAYADTLINAAVAMAYGAAAEIDIYRICHSHPDINEAFRD
ACIDAFFKK"
/besthit="qcoverage 100 , hcoverage 100 , similarity 100
, identity 100 , evalue 0.0 , alnlength 459 , Bacteria ,
Proteobacteria , WP_015589183.1 MULTISPECIES:
dihydrolipoyl dehydrogenase [unclassified Wolbachia]"
gene complement(32173..33282)
/locus_tag="wEsol_01773"
CDS complement(32173..33282)
/locus_tag="wEsol_01773"
/codon_start=1
/transl_table=11
/fullproduct="qcoverage 100 , hcoverage 100 , similarity
100 , identity 100 , evalue 4.94e-264 , alnlength 369 ,
Bacteria , Proteobacteria , WP_015589182.1 MULTISPECIES:
PQQ-like beta-propeller repeat protein [unclassified
Wolbachia]"
/pfam="PQQ_2 PQQ YWTD Pfam-B_3653 PQQ PQQ Pfam-B_2412 PQQ
PQQ_2 PQQ_2 PQQ"
/tigr="TIGR03300 assembly_YfgL 377 outer membrane
assembly lipoprotein YfgL"
/product="PQQ-like
beta-propeller repeat protein"
/translation="MKVIVMIMLLCSSYTMASERISLVDDKKLSQGYVAPVLIENSVI
LSDKHGALYSFDIDNSKAMNWKHLHLSHRKKIGNMSLSHYEKNVFFIVDNTLHAIGAKT
GKIEWEKELRAPVRGKAAVINNKLVVLTDNYLYVFDIKDGSFVWYQNGINEVRGLY
SISPAISNDKIIAPFSNGELIAFNEDGKKLWSQKLATNLLDTQLTDVTTTPRVLGDTL
IATNNSYIYSIDVKSGNILWSKSLQVKSVSVDIESYYSPLIPAEKQKEGGRIFIVTKDD
KIIGLDIKNGETVWTSDLIENTQLFAPIMHAHTLWVTSNKGSMFAFPGSESAGKVVKV

```

```

PGNVFHTPVFTRNKIYVTTEGKGVYSLENRFVFD"
/besthit="qcoverage 100 , hcoverage 100 , similarity 100
, identity 100 , evalue 4.94e-264 , alnlength 369 ,
Bacteria , Proteobacteria , WP_015589182.1 MULTISPECIES:
PQQ-like beta-propeller repeat protein [unclassified
Wolbachia]"
gene 33640..33933
/locus_tag="wEsol_01774"
CDS 33640..33933
/locus_tag="wEsol_01774"
/codon_start=1
/transl_table=11
/pfam="DDE_Tnp_1_5"
/fullproduct="qcoverage 100 , hcoverage 100 , similarity
100 , identity 100 , evalue 6.03e-65 , alnlength 97 ,
Bacteria , Proteobacteria , WP_080717625.1 MULTISPECIES:
transposase [Wolbachia]"
/translation="MPQKMRVSNCHYEYKFKLEKRGNIYFRYIDKAIENWYENSPKMQGG
NYIYSDKVVILVHIIIVNLFRIGLRQTVGFIKGYLQQIGRDLAVISYSQASKKT"
/product="transposase"
/besthit="qcoverage 100 , hcoverage 100 , similarity 100
, identity 100 , evalue 6.03e-65 , alnlength 97 ,
Bacteria , Proteobacteria , WP_080717625.1 MULTISPECIES:
transposase [Wolbachia]"
gene 34315..34566
/locus_tag="wEsol_01775"
CDS 34315..34566
/locus_tag="wEsol_01775"
/codon_start=1
/transl_table=11
/fullproduct="qcoverage 100 , hcoverage 100 , similarity
100 , identity 100 , evalue 4.14e-52 , alnlength 83 ,
Bacteria , Proteobacteria , WP_022626339.1 MULTISPECIES:
hypothetical protein [Wolbachia]"
/translation="MAERNAAIRLIKSYSSEDMKRWKRQTNYGKRSYVESFFSRLKQT
FGFNFRNKSEINRGKELLLKCYLLNQFTDIGMAKFEMAT"
/product="hypothetical protein"
/besthit="qcoverage 100 , hcoverage 100 , similarity 100
, identity 100 , evalue 4.14e-52 , alnlength 83 ,
Bacteria , Proteobacteria , WP_022626339.1 MULTISPECIES:
hypothetical protein [Wolbachia]"
gene complement(34791..35543)
/locus_tag="wEsol_01776"
CDS complement(34791..35543)
/locus_tag="wEsol_01776"
/codon_start=1
/transl_table=11
/fullproduct="qcoverage 95.2 , hcoverage 88.8059701492537
, similarity 100 , identity 100 , evalue 3.23e-168 ,
alnlength 238 , Bacteria , Proteobacteria ,
WP_141457018.1 MULTISPECIES: DUF2163 domain-containing
protein [unclassified Wolbachia]"
/cog="COG5449 COG5449 225 Uncharacterized conserved
protein"
/pfam="DUF2163 Phage_BR0599"
/tigr="TIGR02218 phg_TIGR02218 266 phage conserved
hypothetical protein BR0599"
/product="DUF2163
domain-containing protein"
/translation="MLEINACRWRSNGFTDYDEDLNIDNILYKSSSGFTASSIILNSD

```

```

LKTNDLEIEGILNSVDIKEKDVLSGKYDFANIEIFLVNYKDLTQGTMLHSGIFGKVT
LSSGRFIVEIRGLSAKLEERSIAELYSPACRAQFCDDKCKADTKKFSKISTITKVIDER
RFEDTNLTESDEYYKHGVVKKFFGSIAFEGVVKEYKNKVVTLFTSPPYQIFAGDKYSIL
AGCDKTFPTCRSKFNNTVNFRGEPYIPGFYIV"
/gene="qcoverage 95.2 , hcoverage 88.8059701492537 ,
similarity 100 , identity 100 , eval 3.23e-168 ,
alnlength 238 , Bacteria , Proteobacteria ,
WP_141457018.1 MULTISPECIES: DUF2163 domain-containing
protein [unclassified Wolbachia]"
complement(36033..38018)
/locus_tag="wEsol_01777"
CDS complement(36033..38018)
/locus_tag="wEsol_01777"
/codon_start=1
/transl_table=11
/pfam="Pfam-B_923 Pfam-B_246 Pfam-B_4301 Porin_4"
/fullproduct="qcoverage 100 , hcoverage 100.303490136571
, similarity 99.4 , identity 99.4 , eval 0.0 ,
alnlength 661 , Bacteria , Proteobacteria ,
WP_012673252.1 MULTISPECIES: porin [unclassified
Wolbachia]"
/translation="MKKSMYTRTALVSLTLCSFSSFAADFPDESMKEIKKQESTKTS
GKTEVMKTSNKKLKEKMDRICNADPRKKAEEELKKKEELRLAAEQKKKEEIRLANEKKA
KLIEDSKAKALNAKNSNIEKGKVSCTKRSTKNKAKVEAKDVKKDIKVVNKNTEEKGA
SPVSVGGVDIIDTNQGGQSNLRITFGGVVDAQGYGKARPSGADYKRYNVMNPRSTEEY
NATLDITKGANPIFYEGIGNIGDYSNDMGMIADAILHLRAENKNEDLGLLYGADVQFH
VPVTEGKGASQGVYAAKGRSAHVFNISKYGDVKLGYYQFGPEALMRLDTRIATVDGAA
DSDWFRKVNLEGSAAFFPYVTPRLYTEFSSESEKFSFRMAGKYNKGVMTTLPFRVA
YYSPNYMGARFGISYSPRYDSGLFTVKETVSEDKGGKIEHKETIKHVGPDYEHIVSAG
ASYEYDFDKHNIKVKTSAVGEYGFPPKQPSKDKHLYKEFVEYNDLMGVNFGVSADYKIN
EDQGVKFAASFAYLGKSGQPKGIKKLIGDITYTEIDSKDATDGKRVEGLKAQFGKDSID
TMYWTVGAGYQHENIYTSITYFGSRMNDKMDLHDGALGVQYDLSPACSKNKFVPPYAL
HYFMTNETGKLKDESESDADVPSNQGILLTGVKFSF"
/product="porin"
/gene="qcoverage 100 , hcoverage 100.303490136571 ,
similarity 99.4 , identity 99.4 , eval 0.0 , alnlength
661 , Bacteria , Proteobacteria , WP_012673252.1
MULTISPECIES: porin [unclassified Wolbachia]"
complement(38226..39047)
/locus_tag="wEsol_01778"
CDS complement(38226..39047)
/locus_tag="wEsol_01778"
/codon_start=1
/transl_table=11
/fullproduct="qcoverage 100 , hcoverage 100 , similarity
100 , identity 100 , eval 2.25e-198 , alnlength 273 ,
Bacteria , Proteobacteria , WP_015589180.1 MULTISPECIES:
3'-5' exonuclease [unclassified Wolbachia]"
/cog="COG3298 COG3298 122 Predicted 3'-5' exonuclease
related to the exonuclease domain of PolB"
/pfam="Pfam-B_17156 DNA_pol_B_exo1 DNA_pol_B_exo2
RNase_H_2 GvpG"
/product="3'-5' exonuclease"
/translation="MLNSLLVFDIETIPDVNSCKNLLNISDDSSVEEKRDALTKYHLE
ITNGQNSFLRQPFHLVVVISFLLCNISYQSGYEVFTLQEIIRSGGTLSNSEKELVKGFF
NYISEKKPRLVSFNGRTFDIPVLKYRAMVHGIQAEYFHKAGDKWNSYNQRYSSDWHCD
LLESLSDFGASARVKMNEVCAAFNLPGKIGVDGSQVMDLYDSGKIQEIRDYCETDVIN
TYLIYLRFMHHQGRITTESYNKSAEELLLCEKKEYLKKFKEEWQITCGGKILLP"
/gene="qcoverage 100 , hcoverage 100 , similarity 100
, identity 100 , eval 2.25e-198 , alnlength 273 ,

```

```

Bacteria , Proteobacteria , WP_015589180.1 MULTISPECIES:
3'-5' exonuclease [unclassified Wolbachia]"
gene complement(39040..39924)
/locus_tag="wEsol_01779"
CDS complement(39040..39924)
/locus_tag="wEsol_01779"
/codon_start=1
/transl_table=11
/fullproduct="qcoverage 100 , hcoverage 100 , similarity
100 , identity 100 , evalue 3.73e-203 , alnlength 294 ,
Bacteria , Proteobacteria , WP_010082484.1 MULTISPECIES:
GTPase Era [Wolbachia]"
/cog="Era COG1159 298 GTPase"
/pfam="Pfam-B_1077 Arf GTP_EFTU MMR_HSR1 FeoB_N Miro cobW
DUF258 PduV-EutP Dynamin_N AIG1 Dynamin_N Gag_p10 KH_2"
/tigr="TIGR00436 era 270 GTP-binding protein Era"
/product="GTPase Era"
/translation="MKEQKCLFVTIAGLPNAGKSTLINSIIGKKIAIVTPKVQTTTRTQ
IRGVATCNNTQIVFTDSPGIFSAETKLEKALVKSASAVKDSITLLLVDSNYLKN
ERIKTIFMRLQRTKGRCILVINKTDLVKRPELKMAHEHLNLLYKFKEKVFMSALKNDG
LSDLMNYLSEVASVSPWFYEEDQITDSSTNFLSAEITREKLFLNLREELPYSTAVITE
QFEEKKDKSLVIKQIIFVLKDSHKKIVLGKDGSNIKKINIEARAELEKLFECKVHLFL
FVKVRPWIDRPEEYIGNA"
/besthit="qcoverage 100 , hcoverage 100 , similarity 100
, identity 100 , evalue 3.73e-203 , alnlength 294 ,
Bacteria , Proteobacteria , WP_010082484.1 MULTISPECIES:
GTPase Era [Wolbachia]"
gene complement(40055..40159)
/locus_tag="wEsol_01780"
CDS complement(40055..40159)
/locus_tag="wEsol_01780"
/codon_start=1
/transl_table=11
/fullproduct="qcoverage 100 , hcoverage 100 , similarity
100 , identity 100 , evalue 3.72e-14 , alnlength 34 ,
Bacteria , Proteobacteria , AGK00073.1 hypothetical
protein wHa_06300 [Wolbachia endosymbiont of Drosophila
simulans wHa]"
/translation="MVKTLPLNQAVIQAMASTQEPSLANPPMDFLKSF"
/product="hypothetical protein"
/besthit="qcoverage 100 , hcoverage 100 , similarity 100
, identity 100 , evalue 3.72e-14 , alnlength 34 ,
Bacteria , Proteobacteria , AGK00073.1 hypothetical
protein wHa_06300 [Wolbachia endosymbiont of Drosophila
simulans wHa]"
gene complement(40175..41197)
/locus_tag="wEsol_01781"
CDS complement(40175..41197)
/locus_tag="wEsol_01781"
/codon_start=1
/transl_table=11
/fullproduct="qcoverage 100 , hcoverage 100 , similarity
100 , identity 100 , evalue 1.74e-247 , alnlength 340 ,
Bacteria , Proteobacteria , WP_015589177.1 MULTISPECIES:
cytochrome d ubiquinol oxidase subunit II [unclassified
Wolbachia]"
/cog="AppB COG1294 346 Cytochrome bd-type quinol oxidase,
subunit 2"
/pfam="Cyto_ox_2"
/product="cytochrome d

```

```

ubiquinol oxidase subunit II"
/translation="MFDFSSLINLPLIWGLLIAIAVLLYILMDGFDLGIGILLPFAPS
DKCRDHMISSIAPFWDGNETWLVLVGGGLFAAFPLAYSILMPAFYIPIIIMLLGLIVR
GVSFEFRFKAEGKYRRLWDYAFHFGSLGAAFCQGMILGAFIHGVEVNGRNFSGGQFDW
ASAFSVMTGIAVIFGYALLGSTWLIMKTENITQEWARKVASYTLGFVGIFMGLVSVVT
PFLNERIKNFWFSPNFYLLFSIPLLTSLWLFMLWFDLQNTKREYRPFFLSIAIFFMG
YLGLGISIYPWIIIPFQYTILDAAASGPSLSLMLLIVIIPLLPIILTYTGICYVFRGKS
NYEHTY"
/besthit="qcoverage 100 , hcoverage 100 , similarity 100
, identity 100 , evaluate 1.74e-247 , alnlength 340 ,
Bacteria , Proteobacteria , WP_015589177.1 MULTISPECIES:
cytochrome d ubiquinol oxidase subunit II [unclassified
Wolbachia]"
gene complement(41190..42632)
/locus_tag="wEsol_01782"
CDS complement(41190..42632)
/locus_tag="wEsol_01782"
/codon_start=1
/transl_table=11
/fullproduct="qcoverage 100 , hcoverage 100 , similarity
100 , identity 100 , evaluate 0.0 , alnlength 480 ,
Bacteria , Proteobacteria , ONI56523.1 cyanide
insensitive terminal oxidase [Wolbachia pipientis wUni]"
/cog="CydA COG1271 457 Cytochrome bd-type quinol oxidase,
subunit 1"
/pfam="Bac_Ubq_Cox"
/product="cyanide insensitive terminal
oxidase"
/translation="MAIICNTWVLGKMFKFDPLLLARIQFAFTIGFHIIFPAFTIGLA
SFLAFLEWCWLKTDTRFRDVYKFWIKIFAVAFGMGVVSGVMSYQLGTNWSIFSDRI
ANVLGPLEFSFEVLTAFFLEASFLSIMLFGWNRVSSRMHFASTCIVAVGTLISAFWIIA
ANSWMQTPAGFTTIGENGLLYPTNWLEIIFNPSFPYRFIHMVTAAYLTTAFVVGVGAF
YLWRKRHAPQARIMLGMATIMVALAAPFQLFMGDRHGLNLTCLKHQPAKIAAMEGIWETE
KGAGLLLFAYPDQQNEINHYEIKIPNLASLILTHDFLGEVKGLKEWKKEDRPPVWVF
WSFRIMVGVGILMIIIGSVSVIQYLRGKLFQSCFLHGWVISMMPSGFIALLAGWFTTE
IGRQPYTVYGIMRTIESFSSAITGPQVAWSLIAFIVMYTLIFGAGSYIYLKLIYKIP
VIKEEQFYKHGIGASVIDAGTSGKDNNHV"
/besthit="qcoverage 100 , hcoverage 100 , similarity 100
, identity 100 , evaluate 0.0 , alnlength 480 , Bacteria ,
Proteobacteria , ONI56523.1 cyanide insensitive terminal
oxidase [Wolbachia pipientis wUni]"
gene 43549..44169
/locus_tag="wEsol_01783"
CDS 43549..44169
/locus_tag="wEsol_01783"
/codon_start=1
/transl_table=11
/fullproduct="qcoverage 100 , hcoverage 100 , similarity
100 , identity 100 , evaluate 2.36e-153 , alnlength 206 ,
Bacteria , Proteobacteria , WP_197907379.1 MULTISPECIES:
superoxide dismutase [unclassified Wolbachia]"
/cog="SodA COG0605 204 Superoxide dismutase"
/pfam="Sod_Fe_N Sod_Fe_C"
/product="superoxide
dismutase"
/translation="MSFTLPELPYDKTALEPYISAKTLDFHYDKHHKGYLNKLNELVE
NTDYQHVKIEGLITEVHGNSNLPIFNNAQVWNHTFYWNSMKKNGGGKPKDSSLLAK
KIQDDIGGFDKFYEEFSSHGVSQFGSGVWVLVLEKGRGLGKLKITKTPNADLPPIYGQV
PLLTMDVWEHAYYLDQNRRIDYIKVFLDHLINWDFAEENLEEYMR"
/besthit="qcoverage 100 , hcoverage 100 , similarity 100

```

```

, identity 100 , evaluate 2.36e-153 , alnlength 206 ,
Bacteria , Proteobacteria , WP_197907379.1 MULTISPECIES:
superoxide dismutase [unclassified Wolbachia]"
gene 44166..45437
      /locus_tag="wEsol_01784"
CDS 44166..45437
     /locus_tag="wEsol_01784"
     /codon_start=1
     /transl_table=11
     /fullproduct="qcoverage 100 , hcoverage 100 , similarity
100 , identity 100 , evaluate 2.32e-294 , alnlength 423 ,
Bacteria , Proteobacteria , WP_010962800.1 MULTISPECIES:
insulinase family protein [Wolbachia]"
     /cog="PqqL COG0612 438 Predicted Zn-dependent peptidases"
     /pfam="Peptidase_M16 Peptidase_M16_C 7TMR-HDED
Pfam-B_3045"
     /product="insulinase family
protein"
     /translation="MNIPRVTKLDNGLRIITEQVRDIDSVALSIRVGVGSRAESAKQN
GISHFLEHMAFKGTKTRTAFEIAKAFDDIGGVFNASTGRESTYYAKVLKKDIKTGID
ILIDILMNSTFPEDELEREKGVVQEIFQTNDSPSDIIFDKYFEAAKYDQPFGRSILG
TQNTVKSFTRGDLNYYINEHYFGENMLFAVAGNVEHEEVVALTKDFLSKIHSKKLKS
QNASCTGGEYLEHRKLDQVHLLIGLPSVSRHDDKYHTFQVLDSILGSGMSSRLFQEV
EKQGLAYSVYSFNSSYTNTGMFSIFAGTDSSNLDKLLKSITTELKKLSTDDLKEEEVN
RVKERVKSQILMSRESVSSRAETLGHYGNYNRYISKNELIEKISAVTTANVKAAEE
LLSQHEKTTLAAIGEIESLPSYDKVVSMKA"
     /besthit="qcoverage 100 , hcoverage 100 , similarity 100
, identity 100 , evaluate 2.32e-294 , alnlength 423 ,
Bacteria , Proteobacteria , WP_010962800.1 MULTISPECIES:
insulinase family protein [Wolbachia]"
gene complement(45461..47233)
      /locus_tag="wEsol_01785"
CDS complement(45461..47233)
     /locus_tag="wEsol_01785"
     /codon_start=1
     /transl_table=11
     /fullproduct="qcoverage 100 , hcoverage 112.167300380228
, similarity 87.8 , identity 87.8 , evaluate 5.84e-306 ,
alnlength 590 , Bacteria , Proteobacteria ,
WP_015589174.1 MULTISPECIES: hypothetical protein
[unclassified Wolbachia]"
     /translation="MNIKNNVLLIFDFDNTITNGHMHNALSRLSKSDFNSTQNNAAATD
NDIKNFLENTDGIKNKEGLKSVLQSALSSGIEVNIASYTKYPDAVKEVVKDHLGLFEE
QTGSISVFGGFPGDYDNQLQELDVREQQSQVGKNLHICEAIVKYKNKHGELPKTVMLV
DDDVKNIQKINEFVASMSKRGWLKENGSLVEDINNIKFEGVQVPKEDKNVGYLERVQ
EFVNANLVQEPIYENLRKEEPIYQNLQDTQRQSPEEKPPQLPPKLKNLNAVSQNNEEP
PSLP TKKRKSSDGVVVDDESKKQDIKDMSSSKAQPTRSKRHAMMLDPQQIESIHQNAE
EPPLGKKYAHTETISLLEAFETIRDFQDCGQKIINTIHRLLKKEVITGVKEQGYDVN
SEKGKSEITIYGNKSIDIDIKTDFIDTSLIRIMELGEEKIKDLNNNYKGDQLGREIS
KLLNAGSQKENINSNYNDGEPIFQTREEAWNYPQQKKDINSNSVRGNYNNGEPIFQTR
EEAWNYPQQKKDINSNSVRGNYNNGEPIFQTREEAWNYPQQKKINLNPA SSTTPQGO
VSSSPPRSNIKEACSSQHTASIVK"
     /product="hypothetical protein"
     /besthit="qcoverage 100 , hcoverage 112.167300380228 ,
similarity 87.8 , identity 87.8 , evaluate 5.84e-306 ,
alnlength 590 , Bacteria , Proteobacteria ,
WP_015589174.1 MULTISPECIES: hypothetical protein
[unclassified Wolbachia]"
gene complement(47966..49183)
      /locus_tag="wEsol_01786"

```

```

CDS      complement(47966..49183)
          /locus_tag="wEsol_01786"
          /codon_start=1
          /transl_table=11
          /fullproduct="qcoverage 100 , hcoverage 100 , similarity
100 , identity 100 , evalue 3.06e-299 , alnlength 405 ,
Bacteria , Proteobacteria , WP_015589173.1 MULTISPECIES:
tRNA guanosine(34) transglycosylase Tgt [unclassified
Wolbachia]"
          /cog="Tgt COG0343 372 Queuine/archaeosine
tRNA-ribosyltransferase"
          /pfam="TGT"
          /tigr="TIGR00430 Q_tRNA_tgt 368 queuine
tRNA-ribosyltransferase"
          /product="tRNA guanosine(34)
transglycosylase Tgt"
          /translation="MKEEFSFKRIKQSGSARVGTIKTPNGSVETPAFIFCATKAAIKA
ADIERISEAGTQIILSNTYHMLQPGENTVAKLGGLRKMIGWNGPMLTDSGGYQIFSL
GHGSVSEEIKGIRKKQKTLIKINEDGAIFRSYINGKIYCLTPEKSVQIQKLGADLIL
VLDECTPFHVSKEYTAKSMLMSHRWAERSLNEFEKNNNGKQALYGISQGGIYHDLRRE
SCDFINNLPFFGQAIGGSLGQSKEQMYDVVSFTMDHLKKDRPTHLLGIGGIVDIFRGV
SLGIDTFDCVHPTRLARHGGALIKVKNRDISSSCKKEHINLRNQQFELDDNPIESDCL
CFTCRKHSRAYIHLLKAKELLAYTLVTIHNIFFMNKLMAIRQAILDDRDLQEKNNW
ISEIPLHFDLASL"
          /besthit="qcoverage 100 , hcoverage 100 , similarity 100
, identity 100 , evalue 3.06e-299 , alnlength 405 ,
Bacteria , Proteobacteria , WP_015589173.1 MULTISPECIES:
tRNA guanosine(34) transglycosylase Tgt [unclassified
Wolbachia]"
gene     complement(49184..49684)
          /locus_tag="wEsol_01787"
CDS      complement(49184..49684)
          /locus_tag="wEsol_01787"
          /codon_start=1
          /transl_table=11
          /fullproduct="qcoverage 100 , hcoverage 100 , similarity
100 , identity 100 , evalue 2.19e-118 , alnlength 166 ,
Bacteria , Proteobacteria , WP_010962799.1 MULTISPECIES:
NADH-quinone oxidoreductase subunit NuoE [Wolbachia]"
          /cog="NuoE COG1905 160 NADH:ubiquinone oxidoreductase 24
kD subunit"
          /pfam="Complex1_24kDa DUF3884"
          /tigr="TIGR01958 nuoE_fam 148 NADH-quinone
oxidoreductase, E subunit"
          /product="NADH-quinone
oxidoreductase subunit NuoE"
          /translation="MIEKEEQFSFTSENKKAGKFIEMYPKGREGSVMPLLYLVQEQ
CGWVSESAMRYVADMLHIPHIRVYEVANFYTMYNLKPVGKYLIIQICRTTPCWLCNSEE
VLNTFKKKLGINIGETTKDNLFTLKEVECLGACVNAPVVQINNDFYENLTPEKVENII
TELSGK"
          /besthit="qcoverage 100 , hcoverage 100 , similarity 100
, identity 100 , evalue 2.19e-118 , alnlength 166 ,
Bacteria , Proteobacteria , WP_010962799.1 MULTISPECIES:
NADH-quinone oxidoreductase subunit NuoE [Wolbachia]"
gene     49909..50712
          /locus_tag="wEsol_01788"
CDS      49909..50712
          /locus_tag="wEsol_01788"
          /codon_start=1
          /transl_table=11

```

```

/product="hypothetical protein"
/translation="MSILRRLLGINSNTPEIKEAIGFNPTNVELIEGNVAYGLSYQD
NGNGSSKVKLLISPLYQSKTYECGTNISVANEFKDQLSLTLIEDSAEIDKVGVIFFPEE
GISEEGEKC VKGLSFNTYGIKQSVNTPSVEHLDRKRLQKNIDNNSLANVGNSYFQPR
VKVGNQDVIVIAHNLKDQTLVSWYLKSSSESGKFVLTGEKGVTERKLFNFDNQQLAL
NGNTMLYSQVSKRITKENQEVKTRIFKFDMAKVIQGLKDG VNGFLLGN"
/besthit="qcoverage 100 , hcoverage 73.7569060773481 ,
similarity 100 , identity 100 , evaluate 8.71e-186 ,
alnlength 267 , Bacteria , Proteobacteria , ONI56529.1
hypothetical protein N500_0384 [Wolbachia pipientis
wUni]"
gene 50770..51924
/locus_tag="wEsol_01789"
CDS 50770..51924
/locus_tag="wEsol_01789"
/codon_start=1
/transl_table=11
/product="hypothetical protein"
/translation="MQYVEQTEGNDLVAFLENDQSANEQRLHIATLLKNGSVSDFPIY
QFTDPIEQLYIKGNGQGGFIVTAVSGENIVTFNQNGSGKSSEATIIPANSIKTSLDFV
NIINGRLTPDIISSSTVAPITVAETVVTSKKTPTAAITSTAETDAVKTTKLTTEAVAP
TSTISKPSTESTTVAKTTTTTSQATTVATTSTSVPIVTSGETSTVKPTAATGASTSTM
SKPSTESTTQTSTVTVEPTAPTTTSEKTTQTVFSIPSTRTKESTTPIFTTTLLPQSTS
SPQPTQLAIGSNKAGMIGGSLVGAIGIVGIIIGFIAYRYVKGRNAASVLELTDLG YRRR
SSSSSDEEIFTTGNRMRTIYQSETVLNSISVESSSRSSSSSSSSSGGPGS"
/besthit="qcoverage 100 , hcoverage 57.2280178837556 ,
similarity 100 , identity 99.7 , evaluate 8.57e-180 ,
alnlength 384 , Bacteria , Proteobacteria ,
WP_015589172.1 MULTISPECIES: hypothetical protein
[unclassified Wolbachia]"
gene complement(52483..53253)
/locus_tag="wEsol_01790"
CDS complement(52483..53253)
/locus_tag="wEsol_01790"
/codon_start=1
/transl_table=11
/fullproduct="qcoverage 100 , hcoverage 100 , similarity
100 , identity 100 , evaluate 3.57e-182 , alnlength 256 ,
Bacteria , Proteobacteria , WP_006280099.1 MULTISPECIES:
response regulator transcription factor [Wolbachia]"
/cog="OmpR COG0745 229 Response regulators consisting of
a CheY-like receiver domain and a winged-helix
DNA-binding domain"
/pfam="Response_reg Trans_reg_C"
/tigr="TIGR01387 czrR_silR_copR 218 heavy metal response
regulator"
/product="response regulator
transcription factor"
/translation="MRILLIEDDQVSAKTVVNALTS DGHFCDVV TSAQDYNNNMVSSN
GDYYDLVILDHLP GDIDGYDILLRLRS AKIKVPVLILSCISAVNHKAKGLGYGADDY
LTKPFHKSELLARIKAIVRRTKGHPESVIKIGNININFDHRIVEVKGT VHLTNKEYS
MIELLALRKGT VLT KEMFLNHLNGLDEPSDNKIVDVFMCKLRKKLESANDGKSHIET
VWGRGYVLKEYIDDDDEYSNVNVGESSDGYQAEQVKDNA"
/besthit="qcoverage 100 , hcoverage 100 , similarity 100
, identity 100 , evaluate 3.57e-182 , alnlength 256 ,
Bacteria , Proteobacteria , WP_006280099.1 MULTISPECIES:
response regulator transcription factor [Wolbachia]"
gene 53579..54562
/locus_tag="wEsol_01791"
CDS 53579..54562

```

```

/locus_tag="wEsol_01791"
/codon_start=1
/transl_table=11
/fullproduct="qcoverage 100 , hcoverage 100 , similarity
100 , identity 100 , evalue 8.02e-226 , alnlength 327 ,
Bacteria , Proteobacteria , WP_006280098.1 MULTISPECIES:
NAD(P)H-dependent glycerol-3-phosphate dehydrogenase
[Wolbachia]"
/cog="GpsA COG0240 329 Glycerol-3-phosphate
dehydrogenase"
/pfam="NAD_Gly3P_dh_N ApbA F420_oxidored NAD_Gly3P_dh_C"
/tigr="TIGR03376 glycerol3P_DH 342 glycerol-3-phosphate
dehydrogenase (NAD(+))"
/product="NAD(P)H-dependent
glycerol-3-phosphate dehydrogenase"
/translation="MAISILGAGAWGTAIAISLGSKKDVILWTRNETTFESINGKRES
DKLPGCRISDNVSVKLAIEDTINASVTILAVPTQSLRKVCQQLHNCNLKKDVAIILAC
KGIEKSTLKLPEIVNEILPNNPIAIFSGPSFAVEVARKLPYSMVILACQNNLTGSKLV
SELQQENVKLEFSNDIIGVQICAALKNVFAIACGIVLGSKLGFNAHAALITKSMSEIK
ALYSAKIGDGSVDINTLLGPACLDLIMTCTSLNSRNLSFGFKIGNSDNGFNVQQILS
EGKSVIEGFSTAESIFNLGKLIKMPICEAVYRLLYESASIEDTISVLIS"
/besthit="qcoverage 100 , hcoverage 100 , similarity 100
, identity 100 , evalue 8.02e-226 , alnlength 327 ,
Bacteria , Proteobacteria , WP_006280098.1 MULTISPECIES:
NAD(P)H-dependent glycerol-3-phosphate dehydrogenase
[Wolbachia]"
gene 54582..55064
/locus_tag="wEsol_01792"
CDS 54582..55064
/locus_tag="wEsol_01792"
/codon_start=1
/transl_table=11
/fullproduct="qcoverage 100 , hcoverage 100 , similarity
100 , identity 100 , evalue 1.28e-105 , alnlength 160 ,
Bacteria , Proteobacteria , WP_141457025.1 MULTISPECIES:
phosphatidylglycerophosphatase A [unclassified
Wolbachia]"
/cog="PgpA COG1267 160 Phosphatidylglycerophosphatase A
and related proteins"
/pfam="PgpA"
/product="
phosphatidylglycerophosphatase A"
/translation="MKFLYKLISTWWLSGTVKKMPGTVGSLASFPLVPVILSNKILGA
AIISFLFLIGLWSTGNYIKHYKTSCDPKEVVIDEVVGQLLTILLVSILLSQEMNYSSL
LLCFFSFRFFDIKTPINLIDKNKTKGPLGIMLDDVIAAILACVLIGAFYCLLLVYAG
"
/besthit="qcoverage 100 , hcoverage 100 , similarity 100
, identity 100 , evalue 1.28e-105 , alnlength 160 ,
Bacteria , Proteobacteria , WP_141457025.1 MULTISPECIES:
phosphatidylglycerophosphatase A [unclassified
Wolbachia]"
gene 55054..55833
/locus_tag="wEsol_01793"
CDS 55054..55833
/locus_tag="wEsol_01793"
/codon_start=1
/transl_table=11
/pfam="Acetyltransf_6 Acetyltransf_4 Acetyltransf_3
Acetyltransf_10 Acetyltransf_7 Acetyltransf_1 Pfam-B_745"
/fullproduct="qcoverage 100 , hcoverage 100 , similarity

```

```

100 , identity 100 , evalue 7.23e-188 , alnlength 259 ,
Bacteria , Proteobacteria , WP_006280097.1 MULTISPECIES:
GNAT family N-acetyltransferase [Wolbachia]"
/translation="MQDKKIYYSSLIVQNLKDYILYTANLSEWEVHDEFDNIIFTING
TRESLFNFVFCGDQCTELSIQKTLDYLRTRDIEATWVINSHMKIRDILEKCEIKHVST
PKKALLNMKNYFLPADVIPNLRLNAVNGSNLLEQLDLHTSKIFYHGVGIVSTFFRGLS
NYDDKNSRLRFFLVTLNNEIIGTCGLYVQDSVAGFYSDGVLPIYRNRGIGTQMVLERI
KIAKQLECKYIVAHCMKSSVNLKRLGFMGLNLYLYTSSA"
/product="GNAT family
N-acetyltransferase"
/besthit="qcoverage 100 , hcoverage 100 , similarity 100
, identity 100 , evalue 7.23e-188 , alnlength 259 ,
Bacteria , Proteobacteria , WP_006280097.1 MULTISPECIES:
GNAT family N-acetyltransferase [Wolbachia]"
gene 55876..57012
/locus_tag="wEsol_01794"
CDS 55876..57012
/locus_tag="wEsol_01794"
/codon_start=1
/transl_table=11
/pfam="PAS_9 Pfam-B_1275 PAS_8 PAS_7"
/fullproduct="qcoverage 100 , hcoverage 100 , similarity
100 , identity 100 , evalue 1.88e-268 , alnlength 378 ,
Bacteria , Proteobacteria , WP_010962793.1 MULTISPECIES:
hypothetical protein [Wolbachia]"
/translation="MFFLYEVVLILILILFFLSYSKLIKISNKIKNLQHQNVIINNLI
TVNDGFYIWDAAKKRIEKFSPNLLILLNTVFYSFNEFVNFFEQSESLIKNFVEAKEINK
SFTLDLKS KDSEVYCICYGRSIIIDSNVIGVLLWIRNVSDCKIKANGLELENSKLTQ
EVESYKNVFNSLPFPILRYNKS RKEVFYNLFYDKYVDGSKKFAITGSAHSTKPGRHVI
TYKNEPKVFDFVKIPIQSGSIVMYGKDVSDAEKLYTELNSYLATQKNLLERLPVAIV
IYSKNQKLKFYNNAFIKTFQFDPKFLASYPTYHEVMYLYLFESKKLLEKEDFQTISNQR
HELFFKKLFESYDDTMHFTNGKAFRVLTIPYASEGLLFSYEECKR"
/product="hypothetical protein"
/besthit="qcoverage 100 , hcoverage 100 , similarity 100
, identity 100 , evalue 1.88e-268 , alnlength 378 ,
Bacteria , Proteobacteria , WP_010962793.1 MULTISPECIES:
hypothetical protein [Wolbachia]"
gene complement(57016..57804)
/locus_tag="wEsol_01795"
CDS complement(57016..57804)
/locus_tag="wEsol_01795"
/codon_start=1
/transl_table=11
/fullproduct="qcoverage 100 , hcoverage 100 , similarity
100 , identity 100 , evalue 1.12e-197 , alnlength 262 ,
Bacteria , Proteobacteria , WP_010082472.1 MULTISPECIES:
succinate dehydrogenase iron-sulfur subunit [Wolbachia]"
/cog="FrdB COG0479 234 Succinate dehydrogenase/fumarate
reductase, Fe-S protein subunit"
/pfam="Fer2_3 Fer4_9 Fer4_8 Fer4_17 Fer4_9 Fer4_18"
/tigr="TIGR00384 dhsB 222 succinate dehydrogenase and
fumarate reductase iron-sulfur protein"
/product="succinate
dehydrogenase iron-sulfur subunit"
/translation="MVQFSLPKNSKINQKGKIYPIPARAKNIRRFQIYRWSADDEKNP
RIDTFFIDMDSCGPMVLDALIKIKDEIDSTLTFRRSOREGICGSCAMNIDGTNTLACT
RSIHDIKGDVKIYPLPHMYVIKDLVSDLSQFYEQYKSIKPWLQADKPALPNKEYSQSS
EDRKKLDGLSDCILCACCSTGCPSYWWNSDKFLGPAILLQAYRWIADSRDNKTGERLD
VLNDPFFKLYRCHTIMNCTKTCPKGLNPARAIKVKQLMVEREGV"
/besthit="qcoverage 100 , hcoverage 100 , similarity 100

```

```

, identity 100 , evaluate 1.12e-197 , alnlength 262 ,
Bacteria , Proteobacteria , WP_010082472.1 MULTISPECIES:
succinate dehydrogenase iron-sulfur subunit [Wolbachia]"
gene complement(57891..58343)
/locus_tag="wEsol_01796"
CDS complement(57891..58343)
/locus_tag="wEsol_01796"
/codon_start=1
/transl_table=11
/fullproduct="qcoverage 100 , hcoverage 100 , similarity
100 , identity 100 , evaluate 9.97e-105 , alnlength 150 ,
Bacteria , Proteobacteria , WP_010082473.1 MULTISPECIES:
rRNA maturation RNase YbeY [Wolbachia]"
/cog="COG0319 COG0319 153 Predicted metal-dependent
hydrolase"
/pfam="UPF0054"
/product="rRNA maturation
RNase YbeY"
/translation="MLEVNILDKKWCSIIENPKNFVLGVINASLKEKIDHYKPNISI
ALADDDLLHQLNLKFREMDKPTNVLSFPYEQLSNECDLGDIAISIDTIKRESHEYIIP
ILAHIAHMLVHGLLHLLGYDHQKKDEEIIMKNLEREILASLGYNMCAI"
/besthit="qcoverage 100 , hcoverage 100 , similarity 100
, identity 100 , evaluate 9.97e-105 , alnlength 150 ,
Bacteria , Proteobacteria , WP_010082473.1 MULTISPECIES:
rRNA maturation RNase YbeY [Wolbachia]"
gene complement(58337..58705)
/locus_tag="wEsol_01797"
CDS complement(58337..58705)
/locus_tag="wEsol_01797"
/codon_start=1
/transl_table=11
/fullproduct="qcoverage 100 , hcoverage 100 , similarity
100 , identity 100 , evaluate 2.28e-83 , alnlength 122 ,
Bacteria , Proteobacteria , MBA8753032.1 hypothetical
protein [Wolbachia pipientis]"
/translation="MMSSQHTTHSCMNICLEGSA LNVIADFASNTKVSFQCLTLESSL
NATTLKPLCFNIRLATFIFTNLSMNQNSWIPVPRHWD DILLVYNIRTVVYMTQGSITL
LFWIPVSAICMTPLL MCHSC"
/product="hypothetical protein"
/besthit="qcoverage 100 , hcoverage 100 , similarity 100
, identity 100 , evaluate 2.28e-83 , alnlength 122 ,
Bacteria , Proteobacteria , MBA8753032.1 hypothetical
protein [Wolbachia pipientis]"
gene complement(58728..59126)
/locus_tag="wEsol_01798"
CDS complement(58728..59126)
/locus_tag="wEsol_01798"
/codon_start=1
/transl_table=11
/fullproduct="qcoverage 100 , hcoverage 100 , similarity
100 , identity 100 , evaluate 1.32e-89 , alnlength 132 ,
Bacteria , Proteobacteria , WP_007549395.1 MULTISPECIES:
EVE domain-containing protein [Wolbachia]"
/cog="COG2947 COG2947 156 Uncharacterized conserved
protein"
/pfam="EVE"
/product="EVE
domain-containing protein"
/translation="MQFWLLKSEPSEYSWQKMEKEQVVEWDGVRNYQAQNYMKIMKAS
DLAFFYHTGKEKAILGIVEVFKEYYHVNDPKFGLVNVKFLKPLNNQVTLNNIKQNPLL

```

```

KNMTILKQPRLSIAPVSEIEWNEIIRMSDV"
/besthit="qcoverage 100 , hcoverage 100 , similarity 100
, identity 100 , evalue 1.32e-89 , alnlength 132 ,
Bacteria , Proteobacteria , WP_007549395.1 MULTISPECIES:
EVE domain-containing protein [Wolbachia]"
gene complement(59126..60322)
/locus_tag="wEsol_01799"
CDS complement(59126..60322)
/locus_tag="wEsol_01799"
/codon_start=1
/transl_table=11
/fullproduct="qcoverage 100 , hcoverage 100 , similarity
100 , identity 100 , evalue 1.51e-275 , alnlength 398 ,
Bacteria , Proteobacteria , WP_010962790.1 MULTISPECIES:
cell division protein FtsZ [Wolbachia]"
/cog="FtsZ COG0206 338 Cell division GTPase"
/pfam="Tubulin FtsZ_C"
/tigr="TIGR00065 ftsZ 353 cell division protein FtsZ"
/product="cell division
protein FtsZ"
/translation="MSIDLSPPELPILHPRITVVGVGAGGNAVNMIQSNLQGVNFMV
VANTDAQALEKSLCDKKIQLGINLTKGLGAGALPDVGKGAAEESIDEIMEHIKDSHML
FITAGMGGGTGTGAAPVIAKAAREARAANKDRAPKEKKILTGVGVTKPFGEFEGVRRMR
IAELGLEELQKYVDTLIVIPNQNLFRIANEKTTFSDAFKLADNVLHIGIRGVTDLMMV
PGLINLDFADIETVMSEMGKAMIGTGEAEGEDRAISAAEAAISNPLLDNVSMKGAQGI
LINITGGGDMTLFEVDAAANRVREEVDENANIIIFGATFDQAMEGRVRSVLATGIDGR
NNKSETSPISQSEDSEKEKFKWPYSQSESTQDKTLETKPAEQVSEGAQKWSNIYDIPA
YLRRKK"
/besthit="qcoverage 100 , hcoverage 100 , similarity 100
, identity 100 , evalue 1.51e-275 , alnlength 398 ,
Bacteria , Proteobacteria , WP_010962790.1 MULTISPECIES:
cell division protein FtsZ [Wolbachia]"
gene complement(60561..61025)
/locus_tag="wEsol_01800"
CDS complement(60561..61025)
/locus_tag="wEsol_01800"
/codon_start=1
/transl_table=11
/fullproduct="qcoverage 100 , hcoverage 100 , similarity
100 , identity 99.4 , evalue 8.09e-97 , alnlength 154 ,
Bacteria , Proteobacteria , WP_015589170.1 MULTISPECIES:
hypothetical protein [unclassified Wolbachia]"
/translation="MALTNYEYRKGDGIFHAISEGYIRAKEYWGIPGAAGGAGQYAMH
NKGRTALFPLAVASVFTAMHMKAGFVSAAEASGFLAKTASYFVGVTNQAIASLPGFI
GTGIAGQIVAGAIMAIAAAVLYGTYQIASKLKDVAVEALKGEEKDKEANNL"
/product="hypothetical protein"
/besthit="qcoverage 100 , hcoverage 100 , similarity 100
, identity 99.4 , evalue 8.09e-97 , alnlength 154 ,
Bacteria , Proteobacteria , WP_015589170.1 MULTISPECIES:
hypothetical protein [unclassified Wolbachia]"
gene complement(61109..>62512)
/locus_tag="wEsol_01801"
CDS complement(61109..>62512)
/locus_tag="wEsol_01801"
/codon_start=1
/transl_table=11
/fullproduct="qcoverage 100 , hcoverage 93.0278884462151
, similarity 100 , identity 99.6 , evalue 0.0 , alnlength
467 , Bacteria , Proteobacteria , WP_213863007.1 YifB
family Mg chelatase-like AAA ATPase [Wolbachia]"

```

endosymbiont of Rhagoletis cerasi]"  
 /cog="COG0606 COG0606 490 Predicted ATPase with chaperone activity"  
 /pfam="ChlI AAA\_32 Mg\_chelatase Sigma54\_activat AAA\_19 MCM Pfam-B\_736 AAA\_16 AAA\_5 AAA\_22 AAA Sigma54\_activat MCM Mg\_chelatase\_2"  
 /tigr="TIGR00368 TIGR00368 499 Mg chelatase-like protein"  
 /product="YifB family Mg chelatase-like AAA ATPase"  
 /translation="LPDKTVAESRERIRAAALNSINLLLPPKRITVNLSPADLLKEGSH YDLAIAIGLLVVMNVIPVEKVQSYIIMGELALDSRVIPVSGVLPTAINAKKDNKGVIC PRGNQVEAVWVKVNSILAIEKLTDIIRHFKGEQLIQPVIFNYSAPKEKRLVPDMKDI KGQVVAKRAAEIAAAGGHNMLLVGPPGTGKSMLAKRFIGLLPDLTEQEIIDVNIISST TKTGNEIFKVTRPFREPHHSCSMPAMIGGGKNAKPGEITMAHNGVLFDELPEFPRLV LDSLRLQPLEDRKVTVARANAHITYPANFQLIAAMNPCRCLGDLGASRSCNKA PKCGTD YKNKISGPLLDRIDICIEMPVNSILSPEISVEGESTKIIRERVIAARKVQTERYSELN IRCNSEVSGEAFNKFTEPDQAGLELLKYVLKENYISNRGYTRVLKVARTIADLAKSEE VKRAHIAEALNHRIVY"  
 /besthit="qcoverage 100 , hcoverage 93.0278884462151 , similarity 100 , identity 99.6 , evaluate 0.0 , alnlength 467 , Bacteria , Proteobacteria , WP\_213863007.1 YifB family Mg chelatase-like AAA ATPase [Wolbachia endosymbiont of Rhagoletis cerasi]"  
 gene complement(34673..34759)  
 /locus\_tag="wEsol\_tRNA-32"  
 tRNA complement(34673..34759)  
 /locus\_tag="wEsol\_tRNA-32"  
 /gene="tRNA-Ser"  
 /intronpos="0..0"  
 /program="tRNAscan-SE"  
 /cove\_score="70.3"  
 /evidence=predicted  
 /type="Ser"  
 /anticodon=GGA  
 /product="tRNA-Ser (GGA)"  
 gene complement(9202..9275)  
 /locus\_tag="wEsol\_tRNA-33"  
 tRNA complement(9202..9275)  
 /locus\_tag="wEsol\_tRNA-33"  
 /gene="tRNA-Arg"  
 /intronpos="0..0"  
 /program="tRNAscan-SE"  
 /cove\_score="70.6"  
 /evidence=predicted  
 /type="Arg"  
 /anticodon=CCG  
 /product="tRNA-Arg (CCG)"

# ORIGIN

```

1  taatgttcac tatagtcttc ctttaataacc gattaaatat ttcattatat aaagcttttt
61  tatataagca agttatttgt gttaatttct acgccttttaa tccagcttaa gttagatatt
121 tcatacataa cttgaggagc aattgagtac gcacctggta ataagatgct cactttatgt
181 ttttcgagaa gaagtcttag cattattttg gttctgcctt catctttcaa tattgcgttt
241 aattccatag cggctttttg cgaatccgtg cactcagtgg tgagaactaa ttcttttatt
301 gtagaagcga ttctttttgt aaactcagat atatccttgc ctgctaattc tgtcgtattt
361 tccgaagctt caagatcaat tatcacaaat gttcctggtg aaaataaatc tcttttttct
421 tctattatth cattattata gaatgctatt tcagaaacgt tatggggatc ggaaagtgtg
481 aggataacaa accttccacg ctctgaagtt ctcatcgtg catttaatat taccacagca
541 gtttttgctg ttctattttc tccgataaac ccaatattha acttttccag aagaattcta
601 aatttttcaa gtggatgatt agttaaataa aatcctagtg aaaataactc atgctcta
661 tttttctctt catcaaaatc ttccacattc tcaagtttcg gtttgaggac atcaaggcta

```

|      |             |             |             |             |             |             |
|------|-------------|-------------|-------------|-------------|-------------|-------------|
| 721  | ccaaacaaag  | cagcttgact  | tgattctcta  | tcctgtttgt  | ttttatttgc  | aaagtaaadc  |
| 781  | agcgtgtcca  | ttgactcata  | tagctgcttt  | ctgttcttat  | gcacgctatc  | gaatgctccg  |
| 841  | gatttaatac  | ggctttctag  | cgctctctta  | tttattatat  | gacctgaatt  | ttgaatgaat  |
| 901  | tcccataatg  | ccttacaagc  | gcttgaacgt  | acgttcta    | ttccttccgc  | tatagaaaaa  |
| 961  | ccaacattcc  | tcaaggcagc  | aataccataa  | cgtatgcgtt  | cgttctctat  | tgagaattca  |
| 1021 | gcttttagatt | tgtttatatc  | aggtggaaga  | acggtaacgc  | cactaaactt  | tgctgcatga  |
| 1081 | taaaataaat  | tcagtttatc  | tctatcatca  | atattcagat  | tcattagtgc  | tgtaaaaaat  |
| 1141 | tctaattggat | aattagcttt  | aaggtaagcc  | gtttgataag  | atataaccgc  | atatgctgca  |
| 1201 | gcatgagatt  | tattgaaccc  | ataaccagca  | aattttgcaa  | caagggtcaaa | gatataactt  |
| 1261 | gccctgtcat  | aatcaacgcc  | atTTTTgtt   | gccccttgga  | caaaaagtcc  | acgttgttta  |
| 1321 | tccatctctt  | ccttgatttt  | cttaccatg   | gcacgtctca  | gcagatctgc  | ttccgctaag  |
| 1381 | ctatacccg   | aaagaatacg  | ggctatttcc  | atcacttggt  | cttggtaaat  | tattacccca  |
| 1441 | aatgtctctt  | ttaatacttc  | ctcaagtaac  | ggatgaatat  | aatctggctt  | ttcaagtcca  |
| 1501 | tgttttcttg  | caacataagt  | tggaatgtta  | tccataggtc  | ctggacgata  | aagggaat    |
| 1561 | aaagcgataa  | tatcttcaat  | gcagtcgggt  | tttagtttaa  | ttaaagcttc  | tctcattccc  |
| 1621 | gaactttcaa  | gctgaaacac  | tccaattgaa  | tcaccgcttg  | agagtatctc  | ataggttttt  |
| 1681 | tggtcattta  | aaggaactga  | agaaatatca  | atcttttttc  | catcacgatt  | aattaaacga  |
| 1741 | catacatgat  | ctattagcgt  | tagcgtacca  | agcccaagaa  | aatcaaat    | tattagccca  |
| 1801 | gctttctcca  | catatttcat  | gctgtattga  | gtgattggca  | gagccgaatt  | tggtcgtag   |
| 1861 | tacacaggaa  | caaaattttc  | caacttttga  | tcacatatta  | caattccagc  | agcatgggtt  |
| 1921 | gaaacgtgac  | gatataattc  | ttcaagctta  | agagatatat  | caagaagctt  | tgcaattacc  |
| 1981 | tcatcactat  | cccgtctctt  | ctgcagggtt  | tgatcaaact  | ctatcgcttg  | tgataaagtt  |
| 2041 | acaggattta  | ctggattaaa  | tggaaccatt  | ttagatat    | tatccacttg  | agagtaaggc  |
| 2101 | atttgcaata  | ctctaccaac  | atcacgcaat  | actgcccttg  | cttgcaat    | tccaaaagtg  |
| 2161 | attatttgag  | caacataacc  | gtactttttc  | tgaacataat  | caataaccag  | gtcccttttc  |
| 2221 | tcttggcaga  | aatcgatatc  | aaagtcaggc  | atcgatacac  | gatcaggatt  | caaaaatctt  |
| 2281 | tcaaataatta | ggccaaactt  | tattggatca  | aggtctgtaa  | tctgcaagcc  | ccaagcaaca  |
| 2341 | attgatccag  | caccagagcc  | tcttcctgga  | ccaactggaa  | tgccatttgc  | tttgctccaa  |
| 2401 | cggataaagt  | cagaaactat  | tagaaaatac  | ccggaataat  | tcattgaagt  | tattacgctt  |
| 2461 | agttcgtaat  | ttagccgatc  | gtagtattgt  | ttaaggtcta  | tgtctgtctc  | attcgtaatg  |
| 2521 | cggaattcta  | atcccgcac   | tgctgtctcc  | ctcagttctt  | cattctcagt  | tttattttct  |
| 2581 | ctacaaggaa  | atttaggcag  | aataggctgc  | ctgcttcttg  | gcatgtaaga  | gcaccgctta  |
| 2641 | gctattacta  | aagtgttatg  | aattgcttca  | ggaatatcac  | tgaacagctc  | ctccatttct  |
| 2701 | gccacagatt  | tgaaataatg  | ctcagagggt  | agctttttcc  | tgttattttc  | gagagcataa  |
| 2761 | ctaccctctg  | atatacacgt  | taatatatca  | taagcttcat  | agtcagatct  | atttgtaaag  |
| 2821 | aatacatcat  | ttgttgcaac  | cagtgggtata | ttgtgctgat  | aagcaaaatc  | tattaaagtt  |
| 2881 | tcttcaagct  | ctagctcctt  | gctcagccca  | tgacgctgca  | attcaacata  | taaatgacca  |
| 2941 | ttaaattgctg | aaagcagttt  | ttcaaccggt  | tctttatctt  | gccccaaaca  | tagttgagcc  |
| 3001 | aaacatccac  | cgggttaaagc | gatcagaccc  | gtacttaaat  | tcaatagctc  | atcaaaatca  |
| 3061 | acgtaaggaa  | tatcgctggt  | attcttgccg  | tttctaaaag  | actcactcac  | caaagtgact  |
| 3121 | aaattagtg   | acccttgctc  | atTTTTtgca  | agcaataata  | taggtaaatt  | ttgttctgaa  |
| 3181 | tgtttaacta  | taatattgca  | tcctattatt  | agctgtattc  | ccctacttgc  | cgcataattct |
| 3241 | gcaaaactcaa | gtgaacccaa  | taaattacct  | gaatcagtaa  | ttgcaactgc  | tggtcatttta |
| 3301 | tttcgcaaac  | aaaggccgat  | cagctcctca  | atTTTaaaccg | agctttcaag  | cagcgaataa  |
| 3361 | acactatgaa  | cacgtaagt   | tatgaacata  | agaaacttta  | gatcaacaaa  | aaaggataac  |
| 3421 | attaattttac | tcatgagaac  | ataattttca  | tgagaacaaa  | agcctataaa  | attctaaaaat |
| 3481 | taaaatacaa  | aaacttactt  | gacaaactcc  | accagcgccc  | ttatcatgat  | aatgaagcta  |
| 3541 | ttgtatttgc  | tttcgccaat  | ctgcagatta  | aaaggtaagg  | attacttaat  | gtatcggcgt  |
| 3601 | cttatgttca  | atTTTTtgca  | gtatatagat  | actgtatgtc  | tttacaaaac  | ttcatctaca  |
| 3661 | tctagatttt  | tatctaaata  | agctgaacgc  | gcttataaag  | cgttacaaga  | catcaaaaaa  |
| 3721 | tgccaatact  | cgacagagat  | agtaaaaagac | tagctaactc  | ggggattctt  | tgtctttttt  |
| 3781 | tctgcttagt  | aaatttctta  | aacatttgca  | gcgtagggtta | gttgcaatta  | aaagcagcta  |
| 3841 | aatcttgctt  | gtcaagcggt  | taaaacataa  | aaaacgcca   | tatttttaaag | cggataataa  |
| 3901 | ccacggggct  | tcttttgcct  | ttttttttat  | ttggtaaatt  | tcttaatgtt  | tatggctaaa  |
| 3961 | cgacaaccgt  | catcccgtg   | cttggttagcg | ggatctcttg  | ttagcggctg  | agataaccgcg |
| 4021 | aatgaatcgc  | ggtatgacgg  | ttcgtggcgg  | cgtgacgata  | agctcgtcat  | cccgtacgt   |
| 4081 | gttagcggga  | tctatgttaa  | ggtatgacgg  | ttaagtaagg  | gatctatgtt  | aagggataacc |
| 4141 | gcgaatgaat  | cgcgggtatga | cgtagggatt  | gcattagcta  | taattcttta  | gttttcaactt |
| 4201 | ttcttttaac  | cttgcaatga  | tattttcttt  | gccgataaaa  | attaatagtt  | tagcgagctc  |
| 4261 | tggtcctgtt  | tctgttcctg  | ttaaagctga  | acgcaactgc  | gtaaataggt  | tttttgcctt  |

|      |             |             |             |             |             |             |
|------|-------------|-------------|-------------|-------------|-------------|-------------|
| 4321 | tatatccact  | gtttgtcgaa  | tagttttgac  | ccattctgac  | aacgtgtttt  | cattacaatc  |
| 4381 | accttggggc  | aatgcattga  | acgcaatttt  | tataagctcc  | ttatcaagaa  | tcacaggctc  |
| 4441 | tatatcagat  | ttgcataatt  | tccaccactt  | ggccacctca  | gaaaaccttt  | ctatatgttt  |
| 4501 | ccttataaaa  | taccaaact   | ctgaggagtc  | cactccaatt  | tgattttaaac | ggctctgcac  |
| 4561 | catttcaaat  | ggcatttggt  | gcagaacttt  | gctatttagc  | ttatataatt  | cactcaagct  |
| 4621 | gaattgtaca  | gatgctgagc  | taaatttttt  | aatattaaat  | gaatcaatca  | aagattgcat  |
| 4681 | acaggcacaa  | gcttcaattg  | gattggatgt  | tccgagcttc  | actaaataac  | taactagtgc  |
| 4741 | catcggttca  | atttcattct  | cttttataga  | tttgatatct  | agcacgccgg  | ctcgcttgga  |
| 4801 | tatcttgcta  | tcatacaaat  | gtagcagaga  | aaggtgagca  | aatgtaggga  | ttttcgcttt  |
| 4861 | taatgcttta  | atcatttgga  | gctgaactgc  | ggtattagtt  | acatgatctt  | ccccgcgtac  |
| 4921 | aacatggggt  | acattaaagt  | caacatcatc  | aataacagaa  | ggtaacatgt  | atgtgtaaata |
| 4981 | tccatcttct  | ctttttacca  | cagggtcact  | tatgctactg  | gttgcaatat  | ttatttcacc  |
| 5041 | tttaacttca  | tcattccatt  | taacaacctc  | atttctatcc  | aacttaaatc  | taaaatgtgg  |
| 5101 | tcttcttctt  | tcttgctcat  | aactaatttt  | ctcttgctca  | gttagaagta  | acgcgcttct  |
| 5161 | gtcatataca  | gggggaagtc  | cttgtttttaa | ctgcaatttt  | cgtttaaatgt | ctaactcttc  |
| 5221 | tcttgtttca  | tagcatgcat  | aaatatgccc  | ttcttttatt  | aactgcaaaa  | acacctcatt  |
| 5281 | gtaacgctca  | aagcgctctg  | attgcttgaa  | acttgcattc  | caattgatac  | caatccattt  |
| 5341 | caaactcttg  | atgatatcat  | ttatataatt  | gacatctgaa  | cgctgaagggt | cagtatcatc  |
| 5401 | aaaacggagt  | aaaaattttc  | catttttgatt | gcgtgtgtac  | atccaacaaa  | ccaaggcagt  |
| 5461 | tcgtacgttt  | cctacgtgga  | ggtagccagt  | tgggcttgga  | gcgaatcttg  | ttagcattta  |
| 5521 | aacagcaata  | ttgtttactc  | taattttatt  | taattttata  | taaatatatg  | gctaaagcaa  |
| 5581 | gtgagatctg  | ctaatacaat  | tgagcgagag  | agaataaagt  | atggctatag  | cattgtggca  |
| 5641 | cctttgatata | ttgatggatt  | aagaccatat  | gataaattca  | agaaaattca  | cagcttgacg  |
| 5701 | acaaaggcta  | atgtagcatt  | atattggtat  | catgactaac  | ttagaaaaga  | tgagagaaaa  |
| 5761 | actgcaagat  | caaataaatt  | atcataatgt  | tttgatatcac | caaaaaaata  | agccagaaat  |
| 5821 | aagtgatgct  | gaatatgatg  | aactgaagaa  | aaagttagct  | gaaatagagc  | cagaaattta  |
| 5881 | tgcaacacaa  | gatagtgttg  | gtgctccacc  | tgatgagagg  | ttttctaagg  | tggaacatca  |
| 5941 | agaacctatg  | ctttctcttg  | agaatgctta  | tgatgaacaa  | ggtgtagaga  | aatttttgct  |
| 6001 | taaaataaag  | aggtttttaa  | ttgaggacaa  | aatagagata  | ttatgtgagc  | caaaaattga  |
| 6061 | tgggttgctg  | ttttctgcaa  | tttatgagga  | tgggaagattt | gttaaagctg  | caactcgagg  |
| 6121 | tgatggtttt  | gtaggggaag  | atgtcactca  | caatgttgca  | acaataaaaag | gctttcctaa  |
| 6181 | gtttttgcaa  | ggtgtgcaag  | gaagactaga  | agtaagagggt | gaaatatata  | tcggtaacag  |
| 6241 | cgacttttta  | aagttaaatg  | aaaacgatga  | atttgccaat  | cctcgaaatg  | cagccgctgg  |
| 6301 | ttctctgaag  | caattggatg  | caaacattac  | agcaagtaga  | ccacttagat  | attttgctta  |
| 6361 | ttctttaatt  | ggtggagcag  | agaaaagtca  | aagtgaggta  | ctaaataagc  | ttgaggcact  |
| 6421 | tgggtttttg  | gtaaatgagc  | atcagtcctt  | aacgagtagt  | ttagatggaa  | tgctgaagtt  |
| 6481 | ctataacgag  | gtctataact  | gtcgctataa  | cttggtattat | gatattgatg  | gaatagtcta  |
| 6541 | taaagtaaat  | gattttggtac | tacaaaatcg  | tctagggaaat | actcaciaaag | caccgcgctc  |
| 6601 | agcacttgca  | tacaagtttt  | ctgcggttta  | tgcaaaaaca  | aagttaaata  | agatattttat |
| 6661 | acagggtggg  | agaacagggg  | ttttaactcc  | agttgcagat  | ttagtgccag  | tcaatgtttg  |
| 6721 | tggggtgcta  | gttagtagag  | caagtctgca  | taaccaagat  | gagataaaac  | gtaaagacat  |
| 6781 | aagagaggga  | gatattgtaa  | caatcaaaaag | ggcaggggtga | tgtaattccc  | cagatcgttg  |
| 6841 | aagtaagcag  | agattctcgt  | cttccaaaata | cacctgaatt  | tgtgttttct  | gaagtatgcc  |
| 6901 | ctgaatgtgg  | tagtaaagta  | cgtcagggtt  | agggagaggc  | tgtagtaaga  | tgtcctgagg  |
| 6961 | aatttgcttg  | taaagctcaa  | ataatagaaa  | aactaaagca  | ttttgtatcg  | aaagatgcat  |
| 7021 | ttgacattgt  | tggccttggt  | gataagcaga  | tagagttttt  | ttacgacctt  | ggtctgataa  |
| 7081 | aacaaattcc  | tgatattttt  | actttagaag  | aaagattgga  | tgaatttaata | ctggaagaac  |
| 7141 | agtctggttg  | gggcaagaaa  | tcaatagctc  | atttattaaa  | tgctatacaa  | agcagaaggg  |
| 7201 | taataactct  | agataggttt  | atattttctt  | taggtattag  | atttattgggt | caagttgcag  |
| 7261 | cagaattgct  | tgcagattat  | tatgtttctt  | ataataactg  | gtataattcg  | atgattgaac  |
| 7321 | tgtcatcaga  | taatactgag  | ctagtacagta | tagacggcat  | aggaaaaaaa  | gtggctgaat  |
| 7381 | ctttggaatc  | atttttttct  | aaggaacata  | acatcaaaat  | gttaaatgat  | cttactgctt  |
| 7441 | gtcttcaaat  | tcttctctgt  | agctccaact  | ctagtaactc  | tgtttttaaat | aataaaaatta |
| 7501 | tagtgtttac  | tggtaagcta  | cttgctatga  | gtagaggaga  | ggcaaaaagta | agagccaaaa  |
| 7561 | ctctagggag  | caaaggctcag | ctcacatctt  | tctgctaaaa  | ctgactacct  | aattgcagga  |
| 7621 | gaaaaaccag  | gatccaaata  | taaaaaggca  | gtggaattag  | gtgtagaaat  | tttagatgaa  |
| 7681 | gaccagtggc  | ataaagtgat  | aagtttggga  | gtgttcaaat  | gaaacttgga  | ttgtatatta  |
| 7741 | aatcaaagtt  | gcaagactat  | ttagagagta  | gccaatctct  | tccatccaag  | aatcatttta  |
| 7801 | ttgacttgcc  | tcaatttttc  | aacagaaggc  | aagtcttctg  | tgctgagtgg  | taggcggaca  |
| 7861 | gtttgatgtt  | ctatgagccc  | aatatcatgc  | aaaagtgctt  | tagtggggtat | tgggttgctg  |

|       |             |             |             |             |             |             |
|-------|-------------|-------------|-------------|-------------|-------------|-------------|
| 7921  | gcaataaata  | acgcttcgca  | agcctgttgc  | cagatatctg  | cctgaggggt  | cctgccattg  |
| 7981  | aggcacttct  | taacataattc | atgcgctatg  | cgtggccaaa  | cattgggcagc | aacggaaacc  |
| 8041  | aggccagcct  | caccataagc  | ggccatatca  | gatatcatat  | tatcatctcc  | gcaaaaagacc |
| 8101  | tcaatatttg  | gtgcaacttt  | cttatactga  | gttaaagtat  | caacagtgcc  | acttgaatct  |
| 8161  | ttgatagccc  | aaaatttttc  | gtgactggat  | aagttgctga  | cagtttcagc  | atgaagactc  |
| 8221  | actcctgctc  | tcgatggaat  | attgtaaaac  | atagccggca  | catgtgcttt  | ttcaagtagc  |
| 8281  | ttttcaaacc  | ataaagtctg  | ccccataatt  | ccgggctttg  | cataaatggg  | agttgtcatt  |
| 8341  | agatagccat  | gaataggcat  | acccttgcaa  | aatcaagcc   | attcaagagt  | ctgatataga  |
| 8401  | ttcactcctg  | gtacgccaat  | tataattttc  | gtattttaatt | ttagcttaca  | tacgaattca  |
| 8461  | actaatgtac  | gcttttcaga  | atcagtaagc  | gataggctct  | cacctgtgct  | acctagcaac  |
| 8521  | actacgccat  | tttcagcttt  | aacttgcatt  | gtcagtaaac  | gctgcaaact  | gctataatct  |
| 8581  | atgctatctc  | cattgcaatt  | aaaaggagta  | atacaagcag  | tccataaaaa  | tgtagatttc  |
| 8641  | aattttaaatt | gttaaaatgg  | tatttcatca  | tcgagtagtt  | catcttttat  | atcgttgtca  |
| 8701  | aaactttcgt  | gtttatcttt  | ttgtcctggt  | tcaccttggt  | tgtattcact  | tggcttgtaa  |
| 8761  | tcaggatttg  | gcgactatt   | tcgtgaatcc  | aagagagtaa  | gagcgctatt  | aaaattatat  |
| 8821  | agaaccacct  | ctggtgtgta  | tctttcacca  | ccgttttggt  | cagtccattt  | tctagtcttc  |
| 8881  | aaagaacctt  | caacataaac  | tttactgcct  | ttgcgtgcaa  | aatctttgac  | gatttttact  |
| 8941  | aatccttcac  | taaaaattac  | gatattatgc  | cactctgtct  | tttcagagcg  | cataccggaa  |
| 9001  | agtttgtcag  | tccaactttc  | agacgtggct  | attgaaaaac  | ttgccatttc  | ttttccattt  |
| 9061  | tgtgtagtcc  | taatttcagg  | atcttttctt  | aaattaccaa  | ctagtatgac  | tttgtttatg  |
| 9121  | gtaccaccag  | acataattat  | gctctaaata  | aatcctttta  | ttatcttatg  | tgaaaatact  |
| 9181  | attgtcaaat  | ttaattaaaa  | gtgcgcttgg  | agggattcga  | accacggcc   | tttgactccg  |
| 9241  | gagggcaacg  | ctctatccaa  | ctgagctaca  | agcgcatata  | tatttaagtt  | atttaataga  |
| 9301  | taagccatcc  | aagtcaaatt  | tttgttttgg  | ataaagcgta  | aacataatac  | tcccatatcc  |
| 9361  | aaaatataca  | ttttgagaat  | cattcgcgatg | cttttttatt  | gctttttgat  | ctacggtcca  |
| 9421  | tacaaaagtt  | acataatttt  | cagtgactga  | gtgcactttt  | aaatccttgg  | tatttataaa  |
| 9481  | cagttttcca  | tttacccata  | ttttccatgt  | atcgggagaa  | agatataaaa  | ttgagtctaa  |
| 9541  | actcactacc  | ttaccgttga  | aattatctga  | tacctcctct  | tttgagctc   | ttgaagatcg  |
| 9601  | taaattgaac  | ttttccattt  | cattgaccat  | tctattaact  | ggctcttcat  | caaaaaaaat  |
| 9661  | gcttttttacg | ttactatatt  | gtgacaaaac  | gtcaaagtca  | ctttccactg  | cttctcttat  |
| 9721  | tatatcgtcc  | cgatctgtat  | agcttagttt  | ttgattgttg  | ataaagaaac  | actcttttgc  |
| 9781  | acgcaaattt  | gctatatcaa  | taaaatcgtc  | gatttcttga  | ttgccaaact  | taagaatact  |
| 9841  | ttcaaaatat  | cttttttcta  | tcatcattcc  | atactgagaa  | tgatgacaaa  | ccatttcatc  |
| 9901  | attaccttgt  | ttttctatat  | atacgcataa  | atttccacta  | tttaatccta  | atatttttatg |
| 9961  | ctcaataaaa  | tcttcattgc  | caatatattg  | tcggcaagaa  | tactccttac  | aaatttctat  |
| 10021 | gcttttctatg | atatcttcac  | aactgcaata  | tgcatthaaca | ttggaaatga  | gtagcgtaaa  |
| 10081 | aataaaaaaac | agcttttatgt | tcatcacctt  | atctacttaa  | tatagtatac  | caatcaaaga  |
| 10141 | ctatattagc  | tctcactatc  | tctatcatat  | taccattcaa  | aatctgattc  | atagttgcag  |
| 10201 | catcaatatt  | tctctgctta  | tttaaaaataa | gagatttgat  | cataacataa  | ccgggcagat  |
| 10261 | ttggaataga  | ctgtagaaat  | aaaaaaatat  | gcttatcgct  | gattgagctt  | aaatttagga  |
| 10321 | ccacttcact  | ttttattact  | tttgtgcgtt  | cacttttggt  | gtggagctca  | acttcttcgg  |
| 10381 | gtatagaat   | tgataatttca | ggttctaata  | tatagtgcct  | tttatataac  | ttgctaagct  |
| 10441 | cgaaatttaa  | atttgcaatg  | tatctgctac  | tatgtaaatt  | tgaagaagaa  | atttttttcc  |
| 10501 | ataaatctag  | gttttttatt  | agaacaactt  | cctttttttg  | aattccagta  | atctgtaaat  |
| 10561 | taatagaacg  | tatttttatca | atcgcaattt  | ggttttttatt | ataaatcttt  | tcgttataga  |
| 10621 | taacaacata  | tgttaataac  | cctattaatc  | caacagataa  | taacaaatac  | gatataaaact |
| 10681 | gaattgtagc  | ttttcttttt  | aattgagaga  | tagtcattaa  | tctacattgc  | ctctcctatt  |
| 10741 | tcaacatcaa  | tagatagatt  | ttgctcttta  | gcagcaggta  | agctagaaat  | attaatgtca  |
| 10801 | taggtacgaa  | aattatcggt  | taaatttttt  | cgtagtttct  | cgtgttgatg  | agaaaatattt |
| 10861 | ttaccggatt  | gaaaattaaa  | ctttaaagtt  | gtggtaatat  | aactttttgc  | ctcattataa  |
| 10921 | ttccattcaa  | atgatcgaag  | ctctatacct  | ggtattttta  | acttttctac  | atacttaact  |
| 10981 | tgtgtaagag  | gagagtattc  | tattttttgat | aaaatattat  | tgatattaat  | aaaatcataa  |
| 11041 | atttcatcta  | tttttttttac | attatagcct  | tggctaagtt  | ttgttaattg  | gttatttaag  |
| 11101 | gtgttctgct  | ttgctgataa  | attatcagcg  | acattgaaat  | ttgaatacaa  | atttagcaaa  |
| 11161 | caaaggtgtg  | ttgttataac  | taaaaccagg  | gcgaagtata  | gaaaaattcg  | aggagagttt  |
| 11221 | aaataaaggt  | aattgaatag  | ataaaattct  | ttagtttcct  | ttgtattaaa  | aatagctgct  |
| 11281 | aattttattct | taaagctatg  | aaacaaaatt  | atggatatcgc | aaaagttatc  | tttttcactt  |
| 11341 | atagctagtt  | ctgctcctaa  | tagtttgccct | aactcatatg  | gagttaatat  | gttcacactg  |
| 11401 | ttctctgaaa  | aatttatgac  | tgataaacta  | gctttgatat  | cttctgacac  | tatgatacaa  |
| 11461 | aggtcgatag  | ggttattttt  | ttcaaaccce  | aacttagtta  | aggatcgaat  | agtatcttgc  |

|       |             |            |             |             |             |             |
|-------|-------------|------------|-------------|-------------|-------------|-------------|
| 11521 | acttcctgat  | atattccacc | agcgataatt  | cctggtaa    | tatcattagt  | aatgatgtt   |
| 11581 | aagcgcgtaa  | ataccatttt | attctcttta  | agaaccactt  | gtctatagcc  | tcccgtttta  |
| 11641 | gttgcagcaa  | ctataatttt | ccaattatta  | ggatctttat  | gtagaatctt  | ttttgttata  |
| 11701 | ttacttattt  | ctataggaaa | cattaatatt  | cccttaaagt  | tggagcctat  | ctcaataaac  |
| 11761 | acattcaacc  | aatattctac | taaatgcttt  | gcttttgatg  | aaacaagaag  | atagcaccag  |
| 11821 | ttttgattga  | atgtgtttgg | cttctcaacc  | aaaaaaactg  | aacttatgtc  | attattacga  |
| 11881 | gaaaaatgct  | ccatctttgt | ttttgctgat  | agataggcac  | taatcttggt  | tgcccttgta  |
| 11941 | ataaactgta  | gcgagtaatt | ttgatctgca  | tgattaagca  | ccaggtataa  | aggtgctttt  |
| 12001 | ttatctgacg  | aaagacatga | aattaaatcg  | gaaactgctt  | tatcgttttt  | gcccttaaca  |
| 12061 | aaataccttt  | tatttaaagt | attattttta  | aaatatagta  | acattatgcc  | ttcttctcca  |
| 12121 | atagaaagca  | taaacttact | tttggaattt  | gaactaaaca  | tattaacaaa  | gcataactt   |
| 12181 | atctagaatt  | aaaaaggcaa | tttattgaaa  | ttcattaaac  | gtagagggga  | aatattgtta  |
| 12241 | taaattttcg  | cagcaacatt | atztatatta  | taattttttt  | tataaaatta  | ccactaatat  |
| 12301 | taagttattt  | agataacaaa | ttaagaaaat  | tcattaagac  | gaatttggtg  | tttttcaa    |
| 12361 | tgtaggtaaa  | cctaagccac | tttggtctata | tctgccgatt  | gactttaatt  | aataagagtt  |
| 12421 | attaatctat  | ttactattct | tgtaatat    | tttctaattg  | taaagaaata  | tataattttc  |
| 12481 | tggaacagtt  | gttatttcag | atacagaatt  | tattgtaagt  | atagctcttt  | ttacaataat  |
| 12541 | ccgaacagac  | cgtaatatgc | tactggcctg  | ctatagccat  | aaacacatat  | cttatcgcat  |
| 12601 | tcggactatt  | ataagaaagg | ctataaacta  | accatttgct  | gaagagcgct  | catcttctgt  |
| 12661 | ggtacttgat  | gatggagcaa | ctaatttgct  | caaaatctca  | tcttttggtc  | ccatagcgta  |
| 12721 | aatgacacca  | tctgacatga | ggatcacctt  | atcaactacg  | gacaataacg  | gtagcttggtg |
| 12781 | agtgatgata  | acagtagtag | tattttgttt  | tcttgcaatg  | ccaattgcat  | taattaagca  |
| 12841 | tgctctctcca | ttgctatcta | agttagcggt  | tggttcatca  | agtactaaaa  | gttttggtgtg |
| 12901 | accataaaaa  | gctctggcaa | gtccaagaag  | ctgtttttgg  | ccgccagaga  | gcgttactcc  |
| 12961 | tccaggacct  | cctattgttg | tatcatatcc  | atgttgtaag  | cttagtatta  | gttcatgtat  |
| 13021 | tcctgcaatt  | tttgctgctt | tgattatttc  | ttcaggattt  | ggatctggcc  | tcatgcgagc  |
| 13081 | aatattagct  | ttgacactag | tgttaaataa  | ctcaatatcc  | tgaggtaagt  | agccaacata  |
| 13141 | attacaaaaa  | ttttctcgat | tccaagtata  | tacatcagcg  | ccatctagtc  | tgactacacc  |
| 13201 | agatattggc  | ttccatacac | caacagttaa  | ttttgcgata  | gtggattttac | cagaagcact  |
| 13261 | tgcaccaata  | acaccaacta | catctccagg  | atctataatg  | aatgatattc  | cttttactgt  |
| 13321 | cggcttattg  | cttccataag | gagtaaaaaa  | tactctatca  | aattccaatt  | ttccttcagg  |
| 13381 | ttctggtaga  | gccatcggtt | gctctctttt  | tgggcgatgtt | aatataagtc  | tttgtagcct  |
| 13441 | tccatatgac  | attctagcct | gatttaaaaa  | cttccaagta  | tgaaccgcag  | catcaa      |
| 13501 | tgctaatact  | ctacccatta | aaattgaagc  | agcgatgatg  | ctaccggcag  | tcttatgagc  |
| 13561 | tgtgattgca  | agtaatgcac | ctgttccaat  | cactgatatt  | tgagaggttg  | agcgcaaaaa  |
| 13621 | tttagtgatt  | ccagtaatta | cattagagcg  | atgttggtgt  | ttaatgtgca  | ttgctcgggt  |
| 13681 | ctgatcattt  | cgtttacacc | aatcagagac  | tatgaattct  | gacatgcca   | tagcttcaac  |
| 13741 | cacttctgca  | tttcttggtg | caacatctat  | agcattgata  | ttccgtatag  | tttcttcggt  |
| 13801 | ggtttcttgt  | aatattcggt | tagtggcaag  | ttcattccat  | attgccatag  | agactaatat  |
| 13861 | aataattcca  | gtaatatgta | taaaccccg   | ggagggtatgt | atcatgaaaa  | tcacaacaag  |
| 13921 | gtaaat      | gaccatggag | tatcaa      | tgagaatata  | ccatttcctg  | taatgaa     |
| 13981 | ttttatcact  | ccgagatctc | gtattgcttc  | accacttgaa  | gttgagctct  | gcactgacgt  |
| 14041 | tagcctgatt  | gaccttacta | tcagatctgg  | tggtgcagtt  | ttatcgatcc  | aatcacctat  |
| 14101 | ttttgccatg  | gctaaatatc | gacaagtttc  | aagcattgca  | gaacatgcaa  | atgcagataa  |
| 14161 | agtgataatt  | gtcagcatag | ttagtgttga  | tacactttcg  | ctcgatatca  | cccgatcaag  |
| 14221 | cacttgagag  | gtataaagtg | gtaggaataa  | cattaataaa  | ttgattcccg  | cactaaacca  |
| 14281 | aaagataaac  | caaaatgcac | ttttgcattt  | ttctaggcaa  | acatatagag  | tactttgctt  |
| 14341 | caattctttt  | tttattgatg | gcgtaatttc  | cacaatcttc  | ctcttaattt  | gattacatgc  |
| 14401 | accatataca  | atttttatta | caaaaatatt  | aataacggta  | gttagcttac  | tttaagttag  |
| 14461 | taaaatatta  | atatatgtga | ataggaaata  | taaacaatgg  | taaaaagaag  | tatagttaat  |
| 14521 | atttccttca  | ttgcctatag | cgaagctacg  | tcataccgcg  | attcattcca  | tagctgtacg  |
| 14581 | aacattcatt  | tttgaaggta | aactgcacag  | caaatggtgt  | catgaaagta  | gctgacactg  |
| 14641 | ggatggcttt  | gttgcatcgc | tacttatgaa  | aggctaacta  | taattaggat  | tataagcaac  |
| 14701 | ttattgaaaa  | tcttggtttt | ttgcaatcaa  | tctgatcaaa  | tttaagaata  | gtaattgttt  |
| 14761 | atztatatta  | ataaatttaa | ttctattgaa  | aatagctaaa  | gcattgaaat  | tcttgaattt  |
| 14821 | tagccagatt  | agtgaagtgt | agtgaatttt  | cttttactca  | aatttaggta  | ttcactgacc  |
| 14881 | gttcttggtta | taaataccag | aataataagc  | tactgatatt  | ctccaccttt  | tttatcttta  |
| 14941 | atccatcata  | gctagcgatg | caacaaagcc  | caccgattca  | ttctactgca  | acgcagaaaa  |
| 15001 | ttcgtacaat  | tgtgcataat | atggggcttc  | tggtctacatt | tttctattga  | actcaccttt  |
| 15061 | tctctatgtg  | acagatttcg | tattaaattt  | taaattta    | gcgcctagat  | atacaagcat  |

|       |             |             |             |             |             |             |
|-------|-------------|-------------|-------------|-------------|-------------|-------------|
| 15121 | tcctagcaaa  | accataggta  | tagaaagcaa  | ctgccccata  | gttaaatacaa | gccacaaata  |
| 15181 | gccaaatttga | tagtctggtt  | cgcgaaaaaa  | ctcaacgaaa  | aaacgtgcta  | ttccatacca  |
| 15241 | cataactgca  | ataccagtta  | acgcaccgtg  | atacagtctt  | attctagtta  | agaaaaacag  |
| 15301 | tgaatttgca  | actgcaaaaa  | gtagcagtc   | ttcaaaaagt  | gcctcataaa  | gctggcttgg  |
| 15361 | atgatgcagc  | aaattatcac  | cactctctgg  | aaataccata  | ccccatggca  | tagttgtaac  |
| 15421 | tctgccaaat  | aactctccgt  | ttataaaatt  | gcctatgcga  | cctaaaaata  | aacctatggg  |
| 15481 | aactccgcaa  | gaaactaggt  | ccagtgcata  | aaatatagga  | atgttatgtc  | ttctgcagga  |
| 15541 | gattattact  | gcaagcaaaa  | ctcctatagc  | accgccatga  | aatgacatcc  | ctccttccca  |
| 15601 | ggtcttcaat  | atctcgatag  | ggttgcttat  | ataaagaact  | ggatcatata  | tcaatacgta  |
| 15661 | gccaaagtcta | cctccaagga  | taatacctat  | aatagtggct  | gttaataacg  | aatcgtaaaa  |
| 15721 | attcttagta  | aatatTTTTT  | ggtcatctag  | cctatgtaaa  | taccaatatg  | caaacactat  |
| 15781 | acccaaaacg  | taggctaagg  | aataccaata  | tatagaaaca  | ggaccgatgc  | tgaaaattac  |
| 15841 | tggatttaaa  | gacatatTTT  | gctataaatt  | atTTTTtagac | aatctacttt  | tttcacgata  |
| 15901 | ccactctctc  | tgTTTTtatgg | ttgctctctt  | atcgtagagt  | TTTTTtctt   | ttacaatggc  |
| 15961 | aattTTtagtt | TTTgcaaatc  | ctttatcggt  | aaaatagacc  | gaaagcggca  | caacagttat  |
| 16021 | cccagcagtc  | ttgatttgac  | caattagttt  | atTTatctcc  | TTTTtatgca  | agagtaattt  |
| 16081 | acgttccctt  | TTTggTTtat  | gattTTtgcg  | gttcgcagct  | ttatatcttg  | caatatgcat  |
| 16141 | attgtgcagc  | catacttcgc  | tattctTTTt  | aacaacgtag  | gcgtcggaaa  | tatttacttt  |
| 16201 | tctTTctctt  | agcgatttaa  | cttactgct   | taataagacc  | ataccgcgtt  | caaattcttc  |
| 16261 | taagatgaaa  | tattcaaacc  | ttgctTTtct  | atTTTctgca  | ataacttcca  | tatctaaaga  |
| 16321 | tatctTTaag  | cttcaatata  | ttacagagtt  | TTtgacttaa  | ttcataataa  | aacagttatc  |
| 16381 | ccaataaata  | taaggTgcca  | ggctagtctg  | atagcaacag  | gataacaaaa  | atcaagtaag  |
| 16441 | tgctTTTTtct | gtctctctag  | gcacaagTt   | ctttacttct  | ttcatttcag  | TTTTaggctt  |
| 16501 | tgacattata  | tattgaccag  | caccaactat  | gagcgcagat  | cctgcagcta  | gtccaattat  |
| 16561 | tgctggTaca  | gatagggcag  | tagcaaatgc  | aagtgcaca   | ccaactatca  | ctgcagttac  |
| 16621 | aaaacacaca  | ataatacctt  | ttacaattgc  | atTTTTtgca  | gattgttctt  | tttctttcac  |
| 16681 | aattgcattt  | TTTccaattt  | gTTTTtctt   | ctTTTTtctt  | ggaagctgca  | ttacatcttt  |
| 16741 | atTTtcagta  | agatcctTTg  | gcgTTTTTTt  | attctcattt  | TTtaacgttt  | gctTTTTttc  |
| 16801 | cgcttccctt  | aaaagctgaa  | ttataccttg  | atatttagta  | aggtctcttg  | gcgTTTTtcc  |
| 16861 | atcaacatct  | TTtaatgaag  | ggtctgctt   | agtgtgtagc  | agaacttcca  | ccactTTTTt  |
| 16921 | TTtgccattt  | tcagcagcaa  | gatgtaaagg  | agtacgtcta  | tcaccatttt  | ttgcattaac  |
| 16981 | ctttgctcct  | TTTgcgatta  | gagTTTTttac | tatatcttcg  | tgGCCatttt  | cagcagcaac  |
| 17041 | atgcaaagga  | gtccatctat  | cagcatcctt  | tatattaaca  | tctgctTTtct | caactagaat  |
| 17101 | TTTTactacc  | tctatgtggt  | tattTTtcagc | agcaagatgt  | aaagcagtag  | atctatcatc  |
| 17161 | atTTTctgca  | TTaacctTTg  | ctcctTTTTt  | gattagaatg  | tctactacat  | ctttatggcc  |
| 17221 | ctctctgggt  | gcaagatgta  | aaggagtctc  | gtccacaata  | ccttctgcat  | taacatctgc  |
| 17281 | TTtctcaact  | agaattTTTa  | ctacctctat  | gtggTTtattt | tcagcagcaa  | gatgtaaagc  |
| 17341 | agtacatcta  | tcatcatttt  | ctgcattaac  | ctttgctcct  | TTTgcgatta  | gaatgtctac  |
| 17401 | tacatctTTa  | tggccctctc  | tggctgcaag  | atgtaaagga  | gtacatccat  | catcatcttt  |
| 17461 | tgcattaacg  | TTTactcctt  | tattTTaatag | gtTTTTcacc  | tcctcctcat  | tattatgttt  |
| 17521 | aacagctgaa  | tgcaaagctt  | tgatgttctc  | ttgtgccttt  | aatagagctc  | ctTTtaccac  |
| 17581 | ttcatggcct  | TTTTgagaag  | caaagtTTa   | aggagtccat  | TTataatggT  | ctttcgcatt  |
| 17641 | aacatctgct  | cctTTTTTcaa | ttagagtTt   | tactatatct  | ttgcggccat  | ttgcagcagc  |
| 17701 | aagatgtaaa  | gaagtccacc  | catcactatt  | TTTTgcatca  | acgttgattc  | cttctgcttt  |
| 17761 | tgatagaact  | tgtactatct  | ctttgtggcc  | atTTgtaata  | gcaagatgta  | aaggagccca  |
| 17821 | tcctTTtatca | TTTTctgcat  | taacattTgc  | tcctTTTTcca | attagagtgt  | ttactacatt  |
| 17881 | TTTgtggTt   | TTTTcaacag  | caaaatgTaa  | agaagtccat  | ccatcaccat  | TTTTtgcatc  |
| 17941 | aacaattgct  | cctTTTTccag | ttagaatggT  | tactacatct  | tcgtggccat  | agtgagcagc  |
| 18001 | aatatgtaaa  | ggagtaattt  | tattatcatg  | ttctgcatta  | atatctgccc  | cgtTTtcaat  |
| 18061 | cagagctTTT  | gctacatttg  | catagTtcca  | ataagaagca  | agatgtaaca  | atTTgacttt  |
| 18121 | cttagaattt  | tgaccacaag  | atatagtaaa  | tatgtaattt  | atgccagatc  | cactatcggt  |
| 18181 | gtcaggTTTa  | ctctTTTccc  | actcttgaca  | taaatctgga  | tcttcttctt  | gtaacttagc  |
| 18241 | TTTTatTTTT  | tcaactatat  | tgtccttgct  | caaatctgaa  | aggTcattta  | TTTTTTTTaa  |
| 18301 | tattTccata  | aattTgccat  | atTTcataac  | ttcctcactt  | aaaatacata  | acttagttgt  |
| 18361 | tatatctTTT  | aacatagaag  | tcaagaacct  | aaatatctgt  | tattatcttt  | ccttaaagag  |
| 18421 | tcattTaaagt | tatattacag  | actatgaaaa  | acctcaactt  | taggaaggaa  | atcaagTTTT  |
| 18481 | TTtctctgtc  | atTTataatt  | ttattTgtt   | tatggactgt  | attgtctggT  | tattTTgagc  |
| 18541 | cgTTTTTTat  | TTTTTgtgga  | gtgtTTTcct  | ctataattcac | atcgTTTatc  | TTtagaaggT  |
| 18601 | tgataaacgc  | tgaaagagct  | cttagccaga  | TTTTaaatag  | tacgagtaga  | ctgtcgTTTT  |
| 18661 | ataagTtagt  | aagTtatata  | ccatggTTaa  | tgtaccaaaT  | cattTTtatca | agtgtTTtatg |

|       |             |             |             |             |             |             |
|-------|-------------|-------------|-------------|-------------|-------------|-------------|
| 18721 | taacaaaaaa  | ggtgctacaa  | ctcaaatcta  | agcttgagcc  | aatcattatt  | ctaagaaaat  |
| 18781 | gcaaagggca  | taatgatgaa  | agcattgcgt  | tatttgccaa  | ttcagtcaca  | atcactcccc  |
| 18841 | gaactttaac  | tatcaatggt  | gaaagtaagc  | agaaaacata  | tttctctacc  | atgtatttga  |
| 18901 | tagataaaga  | tcttgaaagc  | ggcatttctg  | aaatagaaaa  | taaaatctta  | aaaatactac  |
| 18961 | gttcagttaa  | gtaattgctt  | taaataagtt  | aacagcatcc  | ttatatcccc  | ttacaagact  |
| 19021 | ttcaagcatt  | tcttttgtaa  | ggctattggt  | aacaatagaa  | cataaataat  | tatacaaatc  |
| 19081 | ttctaacctt  | aatatgttat  | ttctcttctt  | gctggtgaat  | ttatacggaa  | aaataacctc  |
| 19141 | cataacttca  | atagtagtag  | ccttggttaa  | aaatacattt  | tcacttggtc  | cgcttattct  |
| 19201 | tgctaaaaca  | gtgttaattt  | cagggttcgtc | actcgtataa  | aaatctgata  | gctgagttat  |
| 19261 | tctaataacg  | tacaaagtta  | ctatTTTTga  | caagcaatta  | tcagcatatt  | cacaattttt  |
| 19321 | tattacctcc  | cactgagtaa  | cctgagattt  | acctatTTTT  | gcattgttcc  | gtaattttact |
| 19381 | cattgaactt  | tctccattta  | atccagtgta  | ataaattata  | ctaatacttt  | gttaaataaaa |
| 19441 | taataacgcg  | attacaaaaa  | tatatactta  | tagtagtata  | ttatacaaaa  | atagcacaat  |
| 19501 | atctaagcat  | taaagctagt  | ttaagctggg  | tacatggggc  | tattcggttat | tttgtgttgt  |
| 19561 | ccagtggagt  | tcaaaattag  | agggtccactt | atataaagag  | tttagtctgc  | cttctttgct  |
| 19621 | ataaaaataag | ttttcctttt  | gagctgtttt  | gtagtatta   | actaaattct  | aaactaactg  |
| 19681 | tgctataatg  | aaaaagataa  | aactcggaat  | actaatttca  | ggtagggggg  | cgaatatgca  |
| 19741 | ggccttaata  | gaagcatgtc  | aagatcagaa  | tttttccgca  | gaagttgcat  | gtgttatcac  |
| 19801 | aaataatagc  | gaagctgctg  | gtctgaaaat  | agcagagcaa  | gcaggaatat  | cagcgtttat  |
| 19861 | tgttaaagat  | aaaccgcttg  | atgctggtaa  | aattcacgaa  | atacttggtc  | aacataaggt  |
| 19921 | tgattttaatt | tgccttgacg  | ggtttatgag  | aattctcaaa  | gctgattttc  | tgagtaaagt  |
| 19981 | gcataacaag  | gttataaata  | ttcatccctc  | ttacttccg   | tcttttaaaag | gtctaaacgc  |
| 20041 | tcaagagcaa  | gctctaaaag  | cagggtgtaa  | aattacaggt  | tgtactgtac  | attatgtcac  |
| 20101 | tcctgaagtt  | gatgctggag  | ccataattgc  | tcaagttggt  | gtaccagtgt  | taccagctga  |
| 20161 | tgatattcaa  | agcctctcag  | aacgcattct  | agctaaggag  | cataagtgtt  | atgtagaagc  |
| 20221 | agtaagggtca | atagcagaag  | atatatgact  | gtaataatta  | ttgacctga   | gcgttttttc  |
| 20281 | caacttcaac  | aaaaaataaa  | ttttcagggt  | ccagtaaaga  | acttgccagt  | tcgtttactt  |
| 20341 | cctctaattt  | aacatcatta  | atgatattcg  | cataattatt  | tatacgggtta | acatcacgat  |
| 20401 | catttatctg  | catattatct  | agcagcggtg  | ctgtatttgt  | gttattggac  | aggaaaagga  |
| 20461 | caagattatt  | taccaagcca  | atTTTTgcat  | ccttgaacaa  | ttgttcgtca  | attccttgct  |
| 20521 | tttttattct  | gctaaatgta  | tctttttactg | ctgatatagc  | tttgccagca  | gtagaactat  |
| 20581 | cagtacttat  | aaatccagat  | ataatatttc  | catgtttatt  | ggaaataata  | cttgcataaa  |
| 20641 | caccataagt  | aatacccaag  | ttttgcctca  | gttctgtcat  | taatattgaa  | ttcagcctca  |
| 20701 | tgccaccaag  | tgcatcaatt  | aagacaccag  | cgttataata  | attaggatct  | tcataagcta  |
| 20761 | tacctttttg  | agcaaaaagt  | atcacactct  | gtggtatatc  | cataaaaaata | ttcttacttt  |
| 20821 | ctgcagaacc  | aaaattatTT  | tttacaggta  | tttttctaac  | ttttgatctt  | tttgacggca  |
| 20881 | atttagataa  | atatttatct  | aataatgtaa  | taattttctt  | tttttttgca  | caaccagcaa  |
| 20941 | cactgataac  | tatgttatct  | ttagcaaaaat | tacgctttat  | gtatgttaaa  | acatcatctc  |
| 21001 | tagtaatggt  | catttatagt  | tcaagagtac  | cgtaacacact | ttttgagtaa  | ggatgttttt  |
| 21061 | taaacaataa  | cgtatctaatt | tcttttccag  | caacaaaaata | aggacttttt  | tcaagattat  |
| 21121 | taaaattaac  | tttggtcttt  | tcgaaaactc  | tattcaaccc  | ttcagggtca  | actttaggac  |
| 21181 | gcattatagt  | atcgctcagt  | aatgaaattg  | cttctcttag  | attgtcagac  | aaagtattta  |
| 21241 | atgaaaccct  | aaatgcttct  | aatcagcaa   | taaaatttaa  | actaatccct  | ttatcttcaa  |
| 21301 | gctttttcgc  | aaaatctttg  | gcatcatttt  | ttcctgcccc  | ttcttgaatt  | ataagagaag  |
| 21361 | taaaccagggt | aagtccctgt  | ttttctgcat  | tctcatcac   | ataacctgca  | tctttaaatg  |
| 21421 | atatatttcag | tgaaactttt  | ggtaaagcac  | agttttcgac  | aaataaaaaac | ttaaatcctt  |
| 21481 | tacgggtagt  | gacctcctct  | atattttaagc | taccacttgc  | ttgtaaatta  | aagcttaggc  |
| 21541 | agaaaaaaaa  | acagaagtac  | aaattttactt | attctcattg  | ttatctcctt  | ttggtaataa  |
| 21601 | acgaccaatt  | aacttattgg  | aagaaaagat  | agtacgaatt  | ttgttattta  | catcctctaa  |
| 21661 | attaacatca  | tctattttgc  | tatatgaaat  | atctatttca  | tcaagtggaa  | taccaagtgc  |
| 21721 | aagggtgtggc | acatagaaca  | tcgctatatg  | agttaagtca  | gatagattat  | caaactgtgc  |
| 21781 | tgctttgtat  | ctatatttcg  | agctttgcaa  | ctcctcatcc  | gttattcctt  | tagacatgaa  |
| 21841 | gttattaata  | gcattatcta  | actctctttc  | aacaatatct  | aaattaaactc | cgcttttttg  |
| 21901 | aatgacctga  | atatcaatgt  | agccatcact  | aaaagctagg  | ctattataat  | aagcaaacac  |
| 21961 | tgatactgcc  | acatcttcat  | ctaaaaccag  | atcattatac  | agtttgctgg  | atttgccgcc  |
| 22021 | acctaaaatt  | tcaaccgcta  | aatgagcagc  | ggaagcttca  | tttatatgct  | caaataaggg  |
| 22081 | tacacgataa  | cgaaaatata  | aaactggttc  | ttttacttca  | gtgctctcta  | aggtcaccga  |
| 22141 | tagacctgca  | ttatgcactg  | gatcctgatt  | tgggtaattt  | ctcattacag  | gcttagcttt  |
| 22201 | aatttcgccca | tatttttctt  | ctgctaattt  | cactacttca  | tcaagttcca  | catcaccac   |
| 22261 | aatcagtaat  | attgcattgc  | cggagtgata  | atagttatca  | tgaaacctcg  | ttatgtcatc  |

|       |             |             |             |             |             |            |
|-------|-------------|-------------|-------------|-------------|-------------|------------|
| 22321 | caaattgtaa  | gttttgatat  | cgctctccca  | gccgataaca  | gacctaccat  | agccagtacg |
| 22381 | gtaaaatgca  | ctattcatTT  | cttcccataa  | caagttgtta  | ggatgattat  | caaatctcat |
| 22441 | ttttctttct  | tccaacacaa  | tgTTTTTTTc  | tctatctatt  | ttgtcttgag  | taacattaaa |
| 22501 | gctgcccat   | ctatctgctt  | caacttccat  | tgcaagtgg   | aaatcttttt  | tggggatcaa |
| 22561 | ctcaaaataa  | caggtatat   | ctttagtgg   | aaacgcgtta  | aattgagccc  | caatgctact |
| 22621 | catagtggct  | tctatatctg  | tgaactttcc  | tgtagtttca  | aacattaaat  | gttcaaagta |
| 22681 | gtgagccaat  | cctgctttgc  | cgattggatc  | atccattccc  | ccaactttgt  | atattactgc |
| 22741 | atgtaaaacg  | gctggaatcc  | gatgattagg  | aacaatataa  | acatccaaac  | cgttatcgag |
| 22801 | tttagcatgt  | tttatgttgt  | gctctatgtt  | taaagcattc  | gaagaaattg  | ggtaagtaaa |
| 22861 | aaaaatgcag  | gtagtataag  | aaaactaaaa  | agcttatgaa  | gcattatcct  | aacctaatat |
| 22921 | aaacataatt  | actttattcc  | ccattttgtt  | tggaaataaa  | catatcgtat  | gtataccact |
| 22981 | tatatagcga  | tgtcaacatt  | atgtgaatat  | aattatttta  | ttcctcattt  | tgtttagaaa |
| 23041 | taagcatatc  | gtatatatac  | cacttatata  | acaatgtaaa  | cattccacaa  | actatagata |
| 23101 | aatctgctaa  | attaaaggct  | ggccaatacc  | aatcatcaat  | atgaaaatat  | atgaaatcat |
| 23161 | atacagctcc  | ccaatagatc  | ctatcaacta  | cgtttccgat  | tgctccacca  | atcatcagag |
| 23221 | aaaaaccaag  | gtaagttgac  | tgatcgtcag  | acttgatat   | caaatatgca  | agtataccaa |
| 23281 | ttattagtat  | tgaaaatgct  | gaaaaaaaga  | aaccgccatg  | tggtaaagcg  | ctacacattc |
| 23341 | caaaactaat  | acctgaattc  | caaacttcaa  | ctagttttat  | aaaactagcg  | atctcaattg |
| 23401 | attctccttc  | atcaatcaat  | gagtttatgt  | acaatttgct  | cgtttggtca  | atcaatacta |
| 23461 | taattaatat  | aacaactaag  | cataactttt  | tcataaattt  | gcctttaacc  | tataaacttt |
| 23521 | aagtatatca  | taatttatct  | gttttgttaa  | ctcctcaata  | ctatggaatt  | ttttttctga |
| 23581 | ccttatgaat  | tttaaaagtt  | gtatattgac  | tttatgacta  | tatacgtctt  | catcaaaatc |
| 23641 | gaatatgtgc  | atttctatta  | taggcttttt  | cagatcctta  | aaagtaggtc  | tcataccaat |
| 23701 | attgactact  | ccatataacc  | aatttggaat  | actatcagga  | aaagtcactc  | tagcgtataa |
| 23761 | tgtgccaaac  | ttaggtttta  | tcatgcaatc  | ttctatagga  | atatttatgg  | ttggaaatcc |
| 23821 | tatttctcta  | cctctacatg  | caccttttgt  | cacaacacca  | gaaacttgat  | aaggcctgcc |
| 23881 | gagcaattta  | ttagcaattt  | ctatttcgcc  | cctttgtaca  | tactccctta  | ttgaagaaga |
| 23941 | agagcaaatt  | ttgccgtcaa  | ttgttaatgg  | ctctaattta  | gtcaaagagt  | atccatatat |
| 24001 | ttcagaatat  | ttctctagag  | ttaatatatt  | acccaatcgt  | ttatgaccaa  | aagtgcattt |
| 24061 | ttctccgaca  | attatgtgtt  | tagcgccata  | tttatctatt  | aaaatctcac  | tgataaagtc |
| 24121 | atcgagccta  | acctcagaaa  | aacctctatt  | aaaattaata  | atatataagt  | aatctatacc |
| 24181 | atagctgctg  | attagttcct  | ttttttgttc  | ttgggtctatt | aacctaaaat  | tgtttctacc |
| 24241 | aaataaaaaca | gttgatgggt  | gaggctcaaa  | agttaaaact  | gcagagggta  | atcctctttc |
| 24301 | ttgtgctacc  | ttcttttagag | tagaaattgc  | aaactcgtgt  | cctaaatgaa  | tgccatcgaa |
| 24361 | atttccgaag  | gttagtgcta  | tattattttc  | tattccttgc  | tcacaattat  | aaataatttt |
| 24421 | catacaattt  | gatatgtttc  | ttatatataa  | taactatatt  | ttagtaagct  | acggagataa |
| 24481 | attgtgaaaa  | atgttgtgat  | atatgtaaaag | aagggtgtgc  | catactgcat  | aagggtcaag |
| 24541 | gatttactag  | ataaaaaagg  | tgtgaagtat  | gaagaaattg  | atgtgctcaa  | aaactcagat |
| 24601 | ctattttaacg | acataaaaatc | aaagtataac  | gttagaacag  | ttccacagat  | ttttatcaac |
| 24661 | gataagcaca  | ttgggggggtg | tgacaaattg  | atggatcttg  | aaaaagaagg  | aaagttggat |
| 24721 | gatatgctaa  | ataataatga  | caatcacact  | gatgtcacaa  | cctacacaaa  | cagcaatgat |
| 24781 | gaatgtggag  | agtgtgttat  | accacatgat  | gatttttatgt | aactttttat  | cttgttttgt |
| 24841 | cgtgtaatac  | gtaaatgaaa  | actagtatgc  | tcactttaaa  | caattcttaa  | tgaattaaaa |
| 24901 | atacaattca  | ttcagtgagt  | tttttttagtg | ggaaaaaatg  | acaaaaaata  | tttcaattat |
| 24961 | tagcagaaac  | ttaattagta  | tcgaattagt  | taacaaaaca  | gatttagaga  | atttcatcaa |
| 25021 | gattttcaca  | gtgcttgata  | aacatatagc  | agctaaaaca  | ctttttacag  | aagaagttag |
| 25081 | aatagagtat  | aaacaacaca  | acggcataga  | agttgttgaa  | ttgctaaaag  | atacagactt |
| 25141 | tacatatcat  | gagggtgaaa  | atgtattgaa  | ccacctgagt  | aaacatggaa  | tgaaggtgcc |
| 25201 | cagcagtgtt  | atagcacaca  | ccctttttgc  | tgcatacaat  | catgcacttg  | aatttaagga |
| 25261 | tgtagcattt  | tccttttctg  | aaggctctcc  | acaatttaac  | atcagagtga  | gtaagaacac |
| 25321 | cttcataata  | actcctatga  | gtgaggagaa  | tttggaattg  | aattcacaaa  | gtagcaagaa |
| 25381 | attaatagag  | tcgttacaga  | gcgaaaaaaa  | tatttatgat  | tgtatagtag  | aagaaaatac |
| 25441 | cattaaagtt  | atagtgcatt  | ctgaaataca  | tcaagctata  | aatttgatta  | taaaatcact |
| 25501 | gataaagtct  | cgccttttag  | caaaagagga  | agaaggaaaa  | ttcaaagaga  | aattgagaca |
| 25561 | acttgctttt  | aaggatcaag  | cttttggtga  | gtattccagt  | atcaaaaacca | tcagtaggta |
| 25621 | tccacataat  | catcctctga  | gaaagcatga  | aagtgttact  | aaggatatag  | aaaatatttt |
| 25681 | atgtgatttc  | atagcaaatg  | agaatagcga  | gttcgctata  | gagcggttaa  | ataggctgag |
| 25741 | ctcagcagtt  | tctccggata  | ctccaagaat  | catcactaaa  | actatagata  | aacttggtta |
| 25801 | gtttcactaa  | gatatacgag  | agccaataga  | tttcttgtat  | taccttttgt  | catccaagta |
| 25861 | gccttggcta  | cttggttctt  | tttttgggtt  | ccagctatgt  | acatagctgt  | atgaacattg |

|       |             |             |             |             |             |             |
|-------|-------------|-------------|-------------|-------------|-------------|-------------|
| 25921 | tagccgttat  | tcaagtagcc  | cgcagaagcg  | aaaaacttac  | ttgacaaaact | ccgccaaactc |
| 25981 | ccttatcatg  | aaactgaagc  | tattttattta | tcttctctgt  | acagattaaa  | tgacaaaaaaa |
| 26041 | actcacgtat  | ctggcgctctc | atgttttaatt | ttttgcacta  | tgtgcacctt  | atgtcttttat |
| 26101 | aaaactttcta | ggttttttacc | taatataagc  | taaaatgcgc  | ttataaaagca | tttaaaacat  |
| 26161 | aaaaaaacgc  | caacttaaaaa | aatggatagt  | gaataactag  | ctaccctagg  | gtttctttttg |
| 26221 | ccttttttttc | tgttttagtaa | atttcttaat  | gtttataatt  | tagattagtt  | gcggcttaaaa |
| 26281 | agcaactgaa  | tcgcggttat  | taaacgttta  | gaataaaaaa  | acgccatact  | tgaaagtata  |
| 26341 | atgtaagtaa  | ttagccaacc  | acggggccttc | ttttgccttt  | tttttcgttt  | ggtaaatttc  |
| 26401 | ttaatgttta  | tggctaaacg  | acaaccgtca  | tcccgctacg  | tgttagcggc  | cgagataccg  |
| 26461 | cgaatgaatc  | gcggtatgac  | ggttcgtggc  | ggtatgacga  | taacctcgtc  | atcccgctac  |
| 26521 | ttgttagcgg  | gatctagaga  | taccgcgaat  | gaatcgcggt  | atgacgggtc  | gtggcggtat  |
| 26581 | gacgtagaat  | tttatactca  | ccaactcagt  | attccaacct  | ggattgtatc  | ttatcggtaa  |
| 26641 | aaaagaagag  | ctatttttagg | aagttttttat | aggactaaaa  | ccaaagaaaa  | cttgcatata  |
| 26701 | agttttatcaa | gatgtaaaaat | taaagttatt  | ttaaaagaat  | aggtttaatta | tgaatcttgt  |
| 26761 | aacaaaatct  | gctatcgatt  | ttactgcttc  | atctgttctc  | tctgacggag  | aaattggtga  |
| 26821 | tgattttctgt | ctgagtaagc  | gcataaaaaa  | taagtatgct  | gtcctttttt  | tctatccact  |
| 26881 | tgatttttact | tttgtttgcc  | caactgaatt  | gatatcgctc  | aataatagaa  | taaatgagtt  |
| 26941 | tgcaaagcgt  | ggtggtgaag  | tgataggaat  | aagtgtagat  | tcaaaaatttt | cacattataa  |
| 27001 | atggcgaaac  | actccagtta  | atgatggtgg  | tattggagag  | attagctaca  | ctttagtgtc  |
| 27061 | tgatatcaaa  | aagtctatat  | caagagacta  | tggggtctta  | tatgatgact  | caattgcgct  |
| 27121 | gagagcaact  | ttcgttattg  | atgataaatt  | tattgtacgt  | catcaatcga  | taaatgattt  |
| 27181 | gccttttaggg | cgtaatatcg  | atgaattcgt  | tagaatcgtt  | gatgcaatta  | aacataatga  |
| 27241 | agagcatggt  | gaggtgtgtc  | cagcaggggtg | gaaaaaaggt  | aagccagcaa  | tgcaggcaag  |
| 27301 | cgatgaagga  | gtagctgatt  | atctaaactc  | atacagtga   | gaattataaa  | tttagtacia  |
| 27361 | aagttccttat | tattggatct  | ggggcagcgg  | gttatgctgc  | tgctatatat  | gcagcacgtg  |
| 27421 | caaacttaga  | gccaattgta  | gtaacgggaa  | tgcagcctgg  | tggtcagctt  | acaattacta  |
| 27481 | cagatgttga  | aaactatcct  | ggttttgttt  | caatacaggg  | tccagaacta  | atggagcaaa  |
| 27541 | tgaggttgca  | tgcagaaaag  | gttggagcaa  | aaataataga  | tgatgagata  | aaaagcgttg  |
| 27601 | aacaacttga  | ggatttcta   | gagtataggt  | ttagatcttc  | tggtaatatc  | aatgactact  |
| 27661 | attcagatgc  | aattatcatt  | gcactctggtg | cgcaagcgaa  | gtggcttggt  | ttagaaagtg  |
| 27721 | aaaagaaatt  | tcaggggttat | gggggtttcag | cttgtgcgac  | ttgcgatggt  | gcattttttta |
| 27781 | ggaataaaagt | tgtagctgtg  | attggtggtg  | gaaacactgc  | tgttgaagaa  | gcaatatttt  |
| 27841 | taactcgatt  | tgccaaagaa  | gtgatatttaa | tacacaggcg  | tgataaaatta | agagcggaaa  |
| 27901 | aagtaatgca  | agataggctc  | tttaaaaaatg | ataaaaataaa | agtaatgtgg  | aaccataccg  |
| 27961 | tagagcagat  | tcttgagagaa | gaaaatccaa  | aaagggttgc  | tggtattgcg  | attaaatcag  |
| 28021 | cagaaaccca  | agaattaaaa  | gtggatggag  | tgttcattgc  | aatcgggcat  | gcaccaataa  |
| 28081 | cgggtattttt | taaaggcttt  | gttgaaatgg  | atgagcaggg  | ttacatcatt  | acaaaacctg  |
| 28141 | gaacaactttt | aactagtagg  | gcaggagtgt  | ttgctgcagg  | tgatgttcaa  | gataaggtat  |
| 28201 | atcgtcaagc  | agtagttgca  | gcaggaaacag | gatgcatggc  | tgcgcttgat  | gcagaaaagt  |
| 28261 | ttttggagtc  | gtagttaatt  | ctaggattttt | agataaaattg | cttgcaattt  | tccttttctt  |
| 28321 | ttacataatt  | atattagtaa  | atcattaata  | aagagggttt  | agtatgcctt  | atagaaacgg  |
| 28381 | tgtagcatgt  | tatggagctt  | atggaggtgg  | tgataaacacg | gcatcgcaag  | ctcgaaatcc  |
| 28441 | gacaacttca  | agacagctaa  | gtgaatcaac  | aaaacagcta  | tttaaggcta  | ttgatgatgg  |
| 28501 | aaacctagaa  | gatttttaaag | aagctctggc  | agagggtgcg  | gatgttaatg  | cgtttgataa  |
| 28561 | agaaggcatg  | acacctttga  | tgtccatagt  | tactaatttg  | tctgcaggct  | ctgaaacaga  |
| 28621 | aaaagaatat  | cagaatatga  | ttaggttgct  | cctactgcac  | cggagcatag  | atgttaatat  |
| 28681 | ttctgaacaa  | aataataaca  | atacagtttt  | gcatctagca  | atgtgctttc  | aacaaaagaa  |
| 28741 | aactttacaa  | ctcttactaa  | gtcatccaaa  | cataaacact  | tatctaacca  | ataaaaacca  |
| 28801 | tcaaaatcct  | gaggaatgtg  | ctagacaaaa  | tcgtgctggg  | catttgataa  | tagaaaatata |
| 28861 | aaaagcacag  | aaaggaaaaag | aattattagc  | tgctctttct  | agcggaataa  | tttgccaagc  |
| 28921 | gaaaagacta  | ttgaatcaag  | agcttcatcc  | taattgctgg  | agaagaacct  | aagatggaag  |
| 28981 | aataaaaaaca | ccacttagct  | taattattcg  | attatgttta  | cgaacgataa  | cagaagatga  |
| 29041 | aaaagaagta  | ttgacaaaac  | ttttaaaaaca | taaagaccta  | gatttttagtt | acgagcagta  |
| 29101 | tgacacaatta | aagcaaaacaa | ttgaacaagc  | tattcagagc  | cgattaactg  | atactatttaa |
| 29161 | tagaaaagat  | ttagatgatg  | tgaaaaaatt  | agtagaagat  | aattgtttta  | taaatcgtgc  |
| 29221 | agttgttact  | gctgcattgg  | ggggtgttga  | taatccagtt  | aactctatta  | aagattattt  |
| 29281 | aatgaaaaa   | tttcctgcaa  | atacgaataa  | tataccagaa  | gatttttgaga | agtttttaca  |
| 29341 | agggttgtaa  | agaacaaaag  | ctcaacttgt  | agaaaaagag  | caagagctaa  | cgaataaaaac |
| 29401 | tagcaaaatt  | tcactattag  | aaagagattt  | agggcaagta  | agacaggaaa  | aatcggtctca |
| 29461 | aaaaacaaaa  | atcaatgatc  | taaatagtga  | agtaactcga  | cttaatagaa  | ttgtgtatgg  |

|       |             |             |             |             |             |             |
|-------|-------------|-------------|-------------|-------------|-------------|-------------|
| 29521 | aagagcaagc  | gacactgtcg  | aaatTTTtaca | attaaaaaga  | gatttgaaac  | aagtaagggg  |
| 29581 | agaaagagat  | aggctttcat  | cagaaaatag  | actgctccgt  | agtaataaaa  | acgaaaaatc  |
| 29641 | ctcgcaagca  | atttcttctg  | gtagaaaact  | aagcaactac  | gcttctgcat  | gttttatatt  |
| 29701 | gcttgagta   | tatactgttg  | ttgcatgttt  | agtaatagaa  | gattatccag  | ggataataag  |
| 29761 | tgctttcttt  | acagcagttg  | cactggcctt  | ttttttatta  | ggatgttgta  | atttatataa  |
| 29821 | agcaaacaca  | atacttagtg  | atgttgaaag  | cactcagctt  | ggtgggttag  | aacgaagtta  |
| 29881 | aagttttgat  | ttcttctcca  | ggccctgctg  | aaaatTTTTg  | tacatgttaa  | aaacatcttg  |
| 29941 | ataattgagg  | tgagtgtaaa  | tttgagtagt  | ttccaggctt  | gagtgaccaa  | gcagttgttg  |
| 30001 | tattgatctt  | atgtcaatat  | cttcctgaag  | caaataagta  | gcaaaaactat | ggcgaaatgc  |
| 30061 | atgtggagat  | aaaatttctg  | gtaaatttaa  | cattctcctt  | attttctgca  | aacgattggc  |
| 30121 | cacataagtt  | cttcccaatt  | tttttctctt  | tactcccaa   | aaaagatggt  | gtgcttcac   |
| 30181 | aaggtaaggg  | caagctttta  | tatactcttg  | tatacatttt  | tttactacgg  | ggagaatgaa  |
| 30241 | tacctgcctt  | tgtttatctc  | ctttacctgt  | aattattaag  | ttttcgctac  | tgatatcact  |
| 30301 | aaccctaagg  | ttcaacgctt  | cactgattct  | taagcctgta  | ccatatagca  | ggacgataat  |
| 30361 | cgcaatttct  | ctttttacca  | cccaagggtt  | accaggtcgc  | gatagtttca  | tttctttcaa  |
| 30421 | taaagttttt  | atattaggta  | ttgataatgc  | tttgggcaga  | gttcttctct  | gaattggcct  |
| 30481 | tgataaggaa  | aatacagctt  | cattgtctat  | attgtggtta  | ttttttatgt  | acttgaagaa  |
| 30541 | atttctgatt  | actgagagtg  | ctcgagtgtt  | ggatcttgcg  | tttacacctc  | ttgcgtaacg  |
| 30601 | agaggtaagc  | caacttctta  | actcaggtat  | gcttaaattt  | ttcagagtac  | caacatttac  |
| 30661 | ttctccgcca  | atgtgagtat  | ttaggaaact  | tataagatcc  | ttcaagtccc  | tcatgtatga  |
| 30721 | ctctaaagta  | tttgggtgaat | aagatctgtt  | gcacctcagc  | cactcatacc  | atttttcaat  |
| 30781 | gattgaaccg  | aggtccacaa  | ttatttttta  | aagaaagcat  | cgatgcacgc  | atctcgaaag  |
| 30841 | gcttcattta  | tatcaggatg  | agagtgacaa  | attctgtata  | tatcctctgc  | tgctgcgcca  |
| 30901 | tatgccattg  | caaccgctgc  | ttcgtttatt  | agcgtgtcag  | cgtatgctcc  | tatgatatgc  |
| 30961 | acacctagta  | ttgtatctgc  | tctgtacaaa  | gtcagcactt  | tcacgaatcc  | ttcagcatca  |
| 31021 | tcagtgattt  | ttgctctgcc  | gtttgcagca  | aattgacatt  | taccaacttt  | gtacttacgg  |
| 31081 | ccaacacttt  | tcaactcctc  | ttcagtttta  | ccgattgaag  | aaaccgcagg  | gtgagtgtaa  |
| 31141 | atgacagatg  | gtatgatatt  | ataatcaacg  | tgaggtaact  | gccagcgat   | tatctctgca  |
| 31201 | actgccactc  | cttcttcttc  | tgccttatga  | gcaagcattg  | ctccaccgat  | cacatcacca  |
| 31261 | atagcaaata  | ttcctttttac | attagtttca  | tatctgttgt  | taacttgaac  | gaaaccgcga  |
| 31321 | ttatcttttt  | ctatttttttc | atcaatacca  | agattctcag  | tgcatgggtt  | gcgtcctgct  |
| 31381 | gcaaccagca  | ccttatctgc  | ctctataacg  | tttgtttggt  | tatctttttac | agagcaaact  |
| 31441 | ttcacactca  | aagagttgct  | actttgtttt  | atctcctcga  | cttttagtgct | aagtaaaaaat |
| 31501 | tttattcctt  | gtttttgtag  | actagaaagt  | agagacttac  | ttaattctcc  | atccattgct  |
| 31561 | gcagcgattc  | tgtcaaaaaa  | ttctactaca  | gtgacttcag  | accctagcct  | tctccataca  |
| 31621 | gaagacattt  | caagccctat  | tgccccggct  | ccgattacga  | caagtttttt  | tgggtacttca |
| 31681 | gttaaagata  | gtgcaccggt  | ggaagaaata  | atgtctttct  | catcgatatt  | aattcctggc  |
| 31741 | aaagaaataa  | catcagaacc  | ggttgcaatt  | actataattt  | ttgtcttcag  | caccttacct  |
| 31801 | tcaactgaaa  | cttcaagatt  | accttgggtca | aaagaagcaa  | gccatttgat  | tttagtgatt  |
| 31861 | ttgtgaagg   | taaacagata  | ttctatacct  | tttccaagtt  | cctgaactct  | ggcgtcctta  |
| 31921 | tagcctagca  | tttcttttta  | atcgaaactt  | gcgtccttaa  | tttttatgcc  | aagcttcgac  |
| 31981 | agatcatttt  | tcgtgtgagc  | atactgatag  | gaagaatgga  | gcaatgcttt  | ggagggtagt  |
| 32041 | cacccaactc  | tgaggcatgt  | gccacaaaaa  | atgctatttt  | tatctataca  | ggcaactttc  |
| 32101 | aatccaagtt  | ttgcagcagc  | gatagcacac  | ttatagcctc  | ctggggccacc | acctataaca  |
| 32161 | attaaatcat  | aatcagtcac  | aaaaaacaaa  | cctatttttct | aaagaataaa  | caccttttcc  |
| 32221 | ctcagtttgt  | acatatatct  | tattgcgagt  | aaacactgga  | gtgtgaaaca  | cattaccagg  |
| 32281 | tactttgact  | acctttcctg  | cacttttcaga | tcccggaaaa  | gcaaacattg  | aacctttatt  |
| 32341 | gcttgtcacc  | cacagtgtat  | gggcatgcat  | aattggagca  | aacaattgcg  | tattttctat  |
| 32401 | taaatcagat  | gtccagactg  | tttctccatt  | ttttatatcc  | aggccaatta  | ttttatcgtc  |
| 32461 | tttagtaact  | ataaaaaatt  | tgccgccttc  | tttttgtttc  | tctgcaggaa  | taagaggact  |
| 32521 | ataatatgac  | tcaatgtctg  | atacactttt  | tacttgacgt  | gactttgacc  | ataaaaatatt |
| 32581 | tcctgatttc  | acgtcaatgc  | tataaatata  | agaattattt  | gtagctatta  | aagtatcgcc  |
| 32641 | aagcactctc  | ggtgtagtag  | ttacatctgt  | gagctgtgta  | tccaaaagg   | ttgtagccaa  |
| 32701 | tttttggtct  | cacaattttt  | taccgtcttc  | attaaaagct  | attaactcac  | catttgaaaa  |
| 32761 | tgggtgctatt | attttatcat  | tagaaattgc  | tggcgatatg  | gaatacaaac  | ctcgaacctc  |
| 32821 | attgatgccg  | ttttgataag  | tccaaacgaa  | gctgccatct  | tttatatcaa  | acacgtacag  |
| 32881 | ataattatca  | atagtcaata  | ctaccaattt  | attattttatt | actgctgctt  | ttcctcttac  |
| 32941 | tggagctctc  | aattcttttt  | cccactcaat  | cttgccagtt  | tttgcgctta  | ttgctgtaaa  |
| 33001 | agtgttatcc  | actataaaga  | aaacattttt  | ttcataatgt  | gataggctca  | tgttaccaat  |
| 33061 | ttttttccta  | tgtgagaggt  | gtaattttcca | attcatagcc  | tttgagttat  | caatatcaaa  |

|       |             |             |             |              |             |             |
|-------|-------------|-------------|-------------|--------------|-------------|-------------|
| 33121 | ggaatataaa  | gcgccgtgct  | tgtctgataa  | aataacgcta   | ttttctataa  | gcactggagc  |
| 33181 | tacatatcct  | tgagatagtt  | ttttatccac  | tagacttatt   | ctctcgcttg  | ccatttgtga  |
| 33241 | actgctacac  | aataacatta  | tcatgacaat  | tattactttc   | attatttatt  | gaaaacaaga  |
| 33301 | ttcattaata  | tacatcttaa  | gaaccttaat  | tacaacggaa   | atgttcttgc  | tgcatgttaa  |
| 33361 | aaacgttgat  | ttatgaacga  | aatattatat  | tattatgtga   | gataatgtat  | attcttagag  |
| 33421 | gtagtacacc  | tcatccacta  | tgcagcaacg  | tgcatagctg   | tatgaacatt  | gagatataaa  |
| 33481 | ataattttata | ccaagaagaa  | agatgtcatc  | caaatagcct   | cttttcctgt  | catcccagtg  |
| 33541 | cttgacactg  | ggatagcttt  | gttgcatagc  | aactgaaaaa   | atctggtggc  | tactgacaaa  |
| 33601 | attcattata  | aatagctatt  | taactgttga  | agaaaaaata   | tgccacaaaa  | aatgagagtt  |
| 33661 | agtaactgcc  | atgaatataa  | caaatttcta  | gaaaaaagag   | gaaatatttt  | tcgttacatc  |
| 33721 | gataaaagcta | tcgaaaattg  | gtatgaaaat  | agtccaaaaa   | tgccagggcgg | caactatatt  |
| 33781 | tatagtata   | aagtttgtgat | tttagtgcac  | ataatcgtaa   | atcttttttag | aattggctta  |
| 33841 | agacaaacag  | tcgggtttat  | aaaaggatat  | ttgcaacaaa   | taggaagaga  | tttggcagtt  |
| 33901 | atcagctatt  | cgcaagcttc  | aaaaaaaaact | taatatattaag | atcaatgatt  | gcagaattga  |
| 33961 | taaaaaataat | atggaagata  | tcgaaattgc  | catagatagc   | acaagcatca  | gcatttataa  |
| 34021 | caacacacag  | caaggaaaat  | agcgtgata   | gaaaatatcg   | tggctatgaa  | cagacaagaa  |
| 34081 | aattgcatgt  | aatgttgaat  | ataaacagca  | aaaaagccat   | agctgcaaaa  | tacagtaacg  |
| 34141 | gtctgatcac  | tatggagctt  | gcgatttact  | taaaggagtt   | aattttcagc  | atgccataaa  |
| 34201 | agcactatat  | gcagacagag  | catatgacag  | acataaactc   | tataaattgt  | gtgatgaatg  |
| 34261 | cggcataaag  | acaaaaattc  | ctccaaaaaa  | acaatgcagc   | agagcatcca  | aagtatggca  |
| 34321 | gagagaaatg  | ctgcaattag  | actaataaag  | tcatacagcg   | aagatggaat  | gaagaggtgg  |
| 34381 | aaaaggcaaa  | caactacgg   | aaaaagatct  | tatgtagaaa   | gttttttctc  | gcgactgaaa  |
| 34441 | caaacattcg  | ggtttaattt  | tcggaacaaa  | tctgaaatta   | atcgtgggaa  | ggaactgcta  |
| 34501 | ctcaagtgtt  | atltgcttaa  | tcaatttact  | gacattggta   | tggttaaatt  | tgaaatggct  |
| 34561 | acatgaattt  | atcgtaaatt  | accaccgcat  | agttgtaaca   | ttgtaccata  | ttacaatgtt  |
| 34621 | cgtacagttg  | tgtgcgcgac  | cgggggtttt  | atactattct   | agaagtaaca  | tacggaaaag  |
| 34681 | gggggattcg  | aacccccgac  | atattttcat  | atgtgcacgc   | ttccaagcg   | tgtgctttag  |
| 34741 | accactcagc  | cacctttcca  | tgcttattca  | taatattgaa   | aattgtactg  | ctaaacaata  |
| 34801 | taaaaaacctg | gtatataggg  | ttcaccacga  | aaattcacag   | tattgttaaa  | cttgcttctg  |
| 34861 | caagttggaa  | atgttttatc  | gcaacctgcg  | agtattgaat   | atltatctcc  | agcaaaaatt  |
| 34921 | tggtatggag  | gcgaagtaaa  | caacgtaact  | actttatttt   | tatatctttt  | tactacacct  |
| 34981 | tcaaacgcta  | ttgagccaaa  | gaattttact  | actccgtgct   | tataatattc  | atcactctca  |
| 35041 | gttaaattcg  | tgtcttcaaa  | tcttctttcg  | tctattactt   | tagtgattgt  | acttatttta  |
| 35101 | ctaaattttt  | tagtatcggc  | tttacattta  | tcatcgcaaa   | attgtgctct  | gcatgcagga  |
| 35161 | gagtataatt  | ctgctatgct  | tctctcaagc  | tttgcctgaaa  | gccctctaata | ttcaacaata  |
| 35221 | aatcttccac  | tacttaatgt  | cactttacca  | aaaattcctg   | aatgtagatt  | cattgttccc  |
| 35281 | tggttcaagt  | ctttataaatt | cacaagaaat  | atctcaatat   | ttgcaaagtc  | gtactttcct  |
| 35341 | gataaaacat  | ctttttcttt  | gatatacaaa  | ctattttaata  | ttccctcaat  | ttccaaatta  |
| 35401 | tcagtcttta  | aatcgctggt  | taatattata  | ctactggctg   | taaattccact | tgaagattta  |
| 35461 | tagagtatat  | tatcaatatt  | taagtcttca  | tcatagtcag   | tgaatccatt  | acttctccac  |
| 35521 | ctgcaagcgt  | taattttccag | cacgtagcag  | tggttaagtaa  | ttctccagct  | aatgattttt  |
| 35581 | ttagtgtggt  | ttgcataggg  | gcctcctgct  | taattgatta   | aatttgaaag  | tagctataacg |
| 35641 | gccagtagaa  | taagggcagt  | gtgttctttt  | ctcatcatct   | aagtagccat  | aaagcgtcat  |
| 35701 | tccggtgacc  | ataggggtgc  | attccagtg   | ttgacactgg   | aatccaggaa  | atlttgcttg  |
| 35761 | taagtaagca  | aactgatttg  | gtgagcataa  | aaagtggctg   | atcttatgct  | gaataaacgc  |
| 35821 | ttttgatgaa  | gttgcatgga  | aagctggatc  | ccagtgtctg   | ggcactggga  | tgacatcctt  |
| 35881 | cttgggtggag | tgtcctcaaa  | tcacaatgtt  | cgtacagttg   | tgtgtcacgc  | actggaatga  |
| 35941 | caggagagag  | gacaccatat  | gtttatttga  | tcgacaaaata  | aacactaaca  | gacaagaata  |
| 36001 | caccacaatt  | aactgtggtg  | tgtactggct  | ggttagaaaag  | aaaacttcac  | accagtaaga  |
| 36061 | aggagaattc  | cttgggttaga | aggtacatca  | gcatcagact   | cagactcatc  | tttcagctta  |
| 36121 | cctgtttcgt  | tagtcataaa  | ataatggaga  | gctgcgtaag   | gaacaaattt  | gttcttactg  |
| 36181 | catgcaggag  | acagatcata  | ttgaacgcca  | agtgcaccat   | catgaagcat  | atctttgtca  |
| 36241 | ttcattctgc  | tgccaaaata  | cgtcaaactt  | gtgtagatat   | tctcatgttg  | atacccagct  |
| 36301 | cctacagtcc  | aatacatggg  | atctatacta  | tctttaccaa   | attgagcttt  | cagcccttcc  |
| 36361 | actcttttgc  | catcagtagc  | atctttacta  | tcaatttccg   | tataggtatc  | accaattaat  |
| 36421 | tttttaatac  | ccttcggttg  | accagatttg  | cccaagtatg   | caaaagaggc  | agcaaaacttt |
| 36481 | acgccttgat  | cttcattaat  | cttataatca  | gcgcttacac   | caaaattaac  | acccatcagg  |
| 36541 | tcattatact  | ccacaaattc  | cttataaaga  | tgtttatctt   | tacttggttg  | cttttgaaag  |
| 36601 | ccatattcac  | caactgcaga  | agtttttaact | tttatgttat   | gtttatcaaa  | gtcatattca  |
| 36661 | tatgatgcac  | cagcacttac  | tatgtgctca  | tagtctgggc   | cgacatgctt  | tatcgtttcc  |

|       |             |            |            |             |             |             |
|-------|-------------|------------|------------|-------------|-------------|-------------|
| 36721 | ttatgttcta  | tettaccgcc | tttatcttct | gaaactgttt  | cttttacagt  | aaacaaacca  |
| 36781 | ctatcataac  | gaggtgagta | gctgatacca | aatcttgccg  | ccatataatt  | tggtgagtag  |
| 36841 | taagcaactc  | taaatggcag | tgtagtcata | acgcctttgt  | tatatctccc  | tgccatacgg  |
| 36901 | aaagagaatt  | tttcaacttt | actcgaaaaa | ctttcagtg   | aaagacgtgg  | tgttacataa  |
| 36961 | aatggaaagc  | tagcagcgct | tccttctaag | ttcacttttc  | tgaaccagtc  | actatctgca  |
| 37021 | gctccgtcaa  | cagtcgcaat | tcttggtgca | tcaagcctca  | tcagagcctc  | aggaccaa    |
| 37081 | tggtaaccaa  | gcttcacgtc | accatatttt | gagttaacaa  | acacatgcgc  | acttctgcct  |
| 37141 | tttgacgcat  | aaacaccctg | tgaagctccc | ttacccttcg  | tcactgggac  | atgaaactgc  |
| 37201 | acgtcagcac  | cataaagaag | acctaatact | tcattcttat  | tttctgctct  | gaggtgcaat  |
| 37261 | attgcatcag  | caatcatacc | catatcggtg | ctgtaatcac  | caatatttcc  | tattccttca  |
| 37321 | tagaatattg  | gatttgctcc | ttttgttata | tctagagtgg  | cattataata  | ctctgtagat  |
| 37381 | ctgtttggca  | taacggtata | acgtttataa | tctgcgccac  | ttggtctagc  | tttgccataa  |
| 37441 | ccttgagcat  | caacaacacc | accaaagtt  | attcttaaat  | tactttgccc  | ttgattggta  |
| 37501 | tcgataatat  | caactccacc | aactgaaaca | acaggacttg  | ccttaccttt  | ttcctctgta  |
| 37561 | tttttggttaa | caacttttat | atccttcttt | acatctttag  | cttcaacttt  | agcattctta  |
| 37621 | gttttagaac  | gcttagtfff | tgaactttta | cctttttcta  | tattagaatt  | cttagcgfff  |
| 37681 | agagctttcg  | cttttgaatc | ctctataagc | tttgcttttt  | tctcatttgc  | tagcctgatc  |
| 37741 | tcctcttttt  | tcttctgctc | ggctgcta   | cttagctcct  | cttttttctt  | aagctcttca  |
| 37801 | gctttttttc  | ttggatcagc | attacata   | ctgtccatct  | tttctttcag  | ttttttat    |
| 37861 | gatgttttca  | taacttctgt | ttttccagaa | gtttttgtgc  | tctcttgctt  | ttttat      |
| 37921 | ttcatactct  | catcaggaaa | gtcagctgca | aaactgctga  | agaacataa   | agttaataa   |
| 37981 | gaaactagag  | cagttctagt | atacatagac | tttttcatga  | agtgcacca   | aaaaatttcg  |
| 38041 | aaatcata    | ttaaatgtaa | atagtataaa | aatggtgaaa  | attcaactta  | aagcaactt   |
| 38101 | ataacaaaa   | taaaagtaaa | atgcaatacc | ttaaaagcaa  | ctttctta    | atgctcaacg  |
| 38161 | tgtatattaa  | ccaaaattta | gtacagaggt | tcgcttgtaa  | gtgcattata  | actcgactat  |
| 38221 | ttattctatg  | gaagtaaaat | ttttccacca | caagttat    | gccattcttc  | tttaaatttc  |
| 38281 | tttaggtatt  | cttttttttc | gcactctaaa | agcagctctt  | ccgcactttt  | gttgtagctt  |
| 38341 | tcagtagtaa  | tccttccctg | atgatgcatg | aaccttaagt  | aaatcaaata  | agtgttaatt  |
| 38401 | acatctgttt  | cacaataatc | tcgaatctct | tgtatcttgc  | cgctatcgta  | taagtccata  |
| 38461 | acttgtgacc  | catcaactcc | aatcttacca | ggaagattaa  | atgctgcaca  | aacttcgttc  |
| 38521 | atttttactc  | tcgcagaagc | tccaaaatca | gagagggatt  | caagcaaate  | acaatgccaa  |
| 38581 | tcactgctat  | atctctgatt | gtaactat   | cacttatcgc  | cagctttatg  | aaaatattcc  |
| 38641 | gcttgaatgc  | catggaccat | agcacgatac | ttcagcactg  | gtatatcaaa  | agtgcgtccg  |
| 38701 | ttgaacgaaa  | ctaactcttg | ctttttctct | gatatgtagt  | taaaaaatcc  | tttcaactagc |
| 38761 | tcctttttcac | tggaatttag | tgtgcctcca | gatcttat    | cttgacagtgt | gaacacctca  |
| 38821 | taaccactct  | ggtagcttat | attgcaaagt | aaaaaactaa  | taactacaac  | aaggtgaaaa  |
| 38881 | ggctgacgca  | gaaaagagtt | ttgcccgttt | gttat       | gatgatattt  | tggtaatgca  |
| 38941 | tcctctcttct | cttctacact | actatcatca | ctaata      | gtaaat      | gcaggaattt  |
| 39001 | acatctggta  | tagtttcaat | atcaaatacc | aataaagaat  | taagcattgc  | ctatatactc  |
| 39061 | ctccggacgg  | tcgatccaag | gtcgcacttt | cacaaataaa  | aagaggtgta  | ccttgcaactc |
| 39121 | aaataatttt  | tctagttcag | cacgcgcttc | gatattaatt  | tttttaatat  | tactgccatc  |
| 39181 | ttttcctagc  | actat      | tatgactatc | tttcaacaca  | aatatgatct  | gtttgatgac  |
| 39241 | taaactctta  | tctttttttt | cctcaaattg | ttcagttata  | acagctgtag  | agtatggcaa  |
| 39301 | ttcttcacgc  | aagttcaaga | ataat      | tctcgtaatt  | tctgctgata  | aaaaatttgt  |
| 39361 | cgaggaatcg  | gttat      | cttcttcata | aaaccagggg  | ctcaccgatg  | caacttcaga  |
| 39421 | caagtaattc  | atcaa      | aaagtccatc | attctt      | gctgatataca | taaaaacctt  |
| 39481 | ttcaaattta  | taaagcaa   | tcagatgctc | atgcgccatc  | tttaattcag  | gcctttttac  |
| 39541 | caaatcagtt  | ttattgataa | ccaaaatgca | tctgcctttt  | gtgcgctgca  | gccgcataaa  |
| 39601 | tatagtctta  | attctttcta | tatttttcaa | ataattgctt  | acatcaacaa  | gcaacaaagt  |
| 39661 | gatgtcacta  | tccttaactg | ccgaccatgc | agatttgact  | aaagcttttt  | caagttttgt  |
| 39721 | ttctgctgag  | aaaattcctg | gggagtcagt | aaagacaatt  | tgtgtgttgt  | tgcatgttgc  |
| 39781 | aacaccctt   | atttgcgctc | ttgttgtttg | cacttttaggg | gtgacaattg  | caattttctt  |
| 39841 | gcctatgatg  | ctgttaatta | atgtagactt | cccagcattt  | ggtaagccag  | ctatggttac  |
| 39901 | aaataagcat  | ttttgttctt | tcacaaagaa | aattataaag  | aaaactgaat  | gcccgcgtca  |
| 39961 | agctacttat  | atgacaagaa | ggatgacaga | accctttttg  | gttagcatgc  | aaaaaggaaa  |
| 40021 | aaaacttatt  | ctacaaatta | aaaatacaat | atactcaaaa  | acttttcaga  | aaatccatag  |
| 40081 | gaggggtttgc | taatgaaggt | tcttgagttg | acgccattgc  | ctgaatgact  | gcttgattta  |
| 40141 | agggtaacgt  | tttaaccata | aggtcactaa | ctccttaata  | tgtgtgttca  | taatttgatt  |
| 40201 | ttccacgaaa  | gacataatag | caataaccag | tataagttaa  | aatgattggg  | aaaagcggtta |
| 40261 | ttataacaat  | gagcattaaa | gataaacttg | gcccagaagc  | ggctgcatcc  | agaatggtat  |

|       |             |             |             |             |             |             |
|-------|-------------|-------------|-------------|-------------|-------------|-------------|
| 40321 | attgaaaagg  | tataatccat  | gggtagatac  | taattcctaa  | acctaaatat  | cccataaaaa  |
| 40381 | aaatagcaat  | actgagaaa   | aatggacggg  | actcccgttt  | agtattctga  | agatcaaacc  |
| 40441 | acagcatgaa  | aaatagccaa  | gatgtgagta  | atggaataga  | aaataaataa  | taaaaatttg  |
| 40501 | gcatgctaaa  | ccaaaagttt  | ttaatacgtt  | catttaaaaa  | tgggtgtcact | acactcacta  |
| 40561 | gtcccatgaa  | aatacctaca  | aaaccaagcg  | tataagaagc  | aaccttgcggt | gccatttctt  |
| 40621 | gtgttatatt  | ttctgtcttc  | attatgagcc  | atgtagaacc  | taaaagtgca  | tatccaaata  |
| 40681 | tcacagcaat  | gcctgtcatt  | acactaaaag  | cacttgccca  | atcaaattgg  | ccaccagaaa  |
| 40741 | agttgcgtcc  | gtttacttct  | acaccatgta  | taaatgcacc  | taaaatcatg  | ccttggcaaa  |
| 40801 | atgcagcacc  | aagtgaccca  | aaatgaaagg  | cataatccca  | taatcgccgt  | tatttttctt  |
| 40861 | ctgccttaaa  | acgaaactca  | aaggatactc  | cgcgcactat  | aaggccaagc  | agcataataa  |
| 40921 | tgattggaat  | ataaaaagca  | ggcattaata  | ttgaatatgc  | aagaggaaaa  | gcagcaaaca  |
| 40981 | accctccacc  | aaccaatacc  | aaccatgttt  | cgtttccatc  | ccaaaatggg  | gcaattgagc  |
| 41041 | ttatcatgtg  | atcacggcat  | ttatctgacg  | gtgcaaaaagg | aagtaaaata  | ccaataccta  |
| 41101 | aatcaaacc   | atccattaaa  | atatacagta  | aaacagctat  | ggcaattagt  | aatcccaga   |
| 41161 | ttaggggtaa  | attaattaag  | gaagaaaaat  | caaacatgat  | tgttgtcctt  | tccagatgta  |
| 41221 | ccagcatcaa  | tcactgaagc  | tccaataccg  | tgtttataaa  | attgctcttc  | ttctttaatg  |
| 41281 | acaggaattc  | ctttgtatat  | aagtttcaga  | atatagtaac  | taccgcgtcc  | aaatataagg  |
| 41341 | gtatacataa  | cgataaatgc  | aatcaaagac  | catgcaacct  | gaggaccggg  | aatcgcagat  |
| 41401 | gaaaatgatt  | caattgtgcg  | cataattcca  | tatacagtgt  | aagggtgacg  | gccaatttca  |
| 41461 | gtagtaaacc  | aacctgcaag  | taacgctatg  | aaccagacg   | gcatcattga  | tatccaccat  |
| 41521 | ccatgtaaga  | aacaactttg  | gaataatttg  | ccacgaagat  | actgtataac  | acttactgac  |
| 41581 | ccaattatga  | tcattaaaat  | tccaactcca  | accattatac  | ggaaggacca  | gaatacccat  |
| 41641 | actacaggtg  | gtctatcttc  | ttttttccat  | tcctttaatc  | cttttacttc  | tcctaaaaaa  |
| 41701 | tcatgtgtta  | agatcaagct  | ggcaagatta  | ggaattttta  | tctcgtagt   | attaatttca  |
| 41761 | ttttgctgat  | ccggataagc  | aaataaaagt  | aagccagccc  | ctttttcggt  | ttcccatata  |
| 41821 | ccttccattg  | cagcaatctt  | agcaggttga  | tgccttagtg  | tatttaatcc  | atgcctatct  |
| 41881 | cccatgaaca  | gctgaaatgg  | tgcagctaaa  | gctaccataa  | tgggtgccat  | accaagcata  |
| 41941 | attcttgctt  | gaggagcatg  | tcgttttctc  | caaagataaa  | atgctcctac  | accaccaacc  |
| 42001 | acaaaagctg  | ttgtaagata  | ggctgctggt  | accatatgaa  | taaagcgata  | agggaaagaa  |
| 42061 | ggattaaaaa  | taatctctaa  | ccaattgggt  | ggatatagga  | gaccattctc  | accaatcgtg  |
| 42121 | aatccagcgg  | gtgtttgcat  | ccaactgttg  | gccgcaataa  | tccaaaaagc  | tgaaataagc  |
| 42181 | gttcccactg  | caacaataca  | agtagaagca  | aagtgcatac  | gagaacttac  | tctattccat  |
| 42241 | ccaaatagca  | taataactcaa | aaaagatgcc  | tccagaaaaa  | aggctgttaa  | aacctcaaag  |
| 42301 | gaaaatagag  | ggccgagaac  | attggctatg  | cggtcagaaa  | aaatcgacca  | attggtacca  |
| 42361 | agttgatatg  | acattacaac  | tccagatacc  | actcccatgc  | caaaagcaac  | ggcaaaaatc  |
| 42421 | ttgatccaga  | atttataaac  | atcacggaaa  | cgtgtatcac  | cagtcttaag  | ccaacaccat  |
| 42481 | tccaaaaagg  | ctagaaaact  | tgcaagcccg  | atcgtgaaag  | caggaaatat  | aatgtgaaag  |
| 42541 | cctattgtga  | aggcaaaactg | aattcgagct  | aataataaag  | gatcaaattt  | aaacattttt  |
| 42601 | cctaataccc  | atgtattaca  | aataatagcc  | aaatctgcct  | ataattcaat  | ccattttttt  |
| 42661 | acaaaattga  | ccttaccag   | aaaaagtaga  | gagaaagtta  | agacgttttt  | gtcatgagaa  |
| 42721 | taaattgtgc  | aggaatacaa  | ctgttctccc  | ttgtcatacc  | gtcacgggat  | ctctagatcc  |
| 42781 | cgctaacacg  | tagcggaatg  | acgattgtca  | ggccagcgcc  | cctatgatgt  | catcccagtg  |
| 42841 | ctcctttttt  | tgtcatccca  | gtgtcagcta  | ctcggatgac  | atcatccttt  | ttttgggatt  |
| 42901 | ccagcgtcac  | gcgctggaat  | gacaccttcc  | gtataaacat  | taagaaattt  | accaagcgga  |
| 42961 | gaaaaaggca  | aaagaagccc  | cgtgggttgg  | taattactta  | cattatactt  | tcaagtatgg  |
| 43021 | cgtttttttt  | ttctaaacgt  | ttaataaccg  | cgattcagtt  | gctttttaaac | cgcaactaat  |
| 43081 | ctaaattaga  | aacattaaga  | aattttactaa | acagaaaaaa  | aggcaaaaaga | aaccctaggg  |
| 43141 | tagctaatta  | ttcactatcc  | atttttttaag | ttggcggttt  | ttaatgtttt  | aatgtcttta  |
| 43201 | taagcgtatt  | tcagcttgtg  | taggtaaaaa  | cccagaaatt  | tgataaagac  | ataagggtgca |
| 43261 | catagtgcaa  | aaaattaaac  | atgagacgcc  | agatacgtga  | gtttttttgt  | catttaatct  |
| 43321 | gtacagagaa  | gataaataaa  | tagcttcagt  | ttcatgataa  | gggggctggc  | gaaggggtgc  |
| 43381 | aagtaacttt  | tgcattttaat | ccattttctat | ggcttatata  | ataatcgtta  | ttgtagtata  |
| 43441 | atttagaata  | atgcaataga  | tacctaaatg  | tttttagctat | taattatatg  | ttgcacaaaa  |
| 43501 | gcatatattg  | ccctaccatc  | caagtaggtt  | agaaataaag  | aggtttttat  | gagttttact  |
| 43561 | ttacctgaat  | taccatatga  | taaaacagct  | ttagagcctt  | acatatctgc  | aaaaacttta  |
| 43621 | gacttttcatt | atgataagca  | tcataaaagg  | tattttaaata | aactcaacga  | gctggttgaa  |
| 43681 | aatacggatt  | atcagcatgt  | gaaaattgag  | ggattaataa  | cagaagttca  | tggtaatagc  |
| 43741 | agcaacttgc  | ctatatttta  | taacgcagca  | caagtttgga  | accacacttt  | ttattggaac  |
| 43801 | tcaatgaaaa  | aaaatgggtg  | tggtaaagcct | aaagatagta  | gtcttttagc  | aaaaaaaaatt |
| 43861 | caggacgata  | tcggtggcct  | tgataaaattt | tatgaagaat  | tttcgagtca  | tggagtaagc  |

|       |             |              |             |             |             |             |
|-------|-------------|--------------|-------------|-------------|-------------|-------------|
| 43921 | cagtttggca  | gtggatgggt   | atggtttagtg | ctcgaaaaag  | gtaggtttagg | aaagctcaaa  |
| 43981 | atcaccaaga  | ctccaaatgc   | agatttgcca  | ataatttatg  | gccaaagtgcc | actactcact  |
| 44041 | atggatgtgt  | gggagcacgc   | ctattatttta | gattgtcaaa  | accgtagaat  | tgactacata  |
| 44101 | aaagttttcc  | ttgatcathtt  | gattaatttgg | gattttgcag  | aagagaactt  | agaagaatat  |
| 44161 | atgagatgaa  | tataccccgg   | gtaacaaaat  | tagataatgg  | tctgcgcata  | ataactgagc  |
| 44221 | aggtgctgta  | tattgattcc   | gtagcttttaa | gcatacgagt  | tgggtgttggc | agtagagcag  |
| 44281 | aaagtgc aaa | gcaaaatgga   | atatcccat   | ttttagaaca  | catggcctttc | aaagggacga  |
| 44341 | agacaagaac  | tgccttttgaa  | attgcaaaaag | cttttgatga  | cataggtggg  | gttttcaacg  |
| 44401 | ccagcactgg  | tagggaaagc   | accacctatt  | atgcaaaaagt | cctcaagaaa  | gacataaaaa  |
| 44461 | ctgggtattga | tatatattaata | gatatattga  | tgaattccac  | gtttccagaa  | gatgaattgg  |
| 44521 | aacgtgagaa  | gggtgttgta   | atacaagaga  | tttttcaaac  | taatgattca  | ccaagtgaca  |
| 44581 | ttatttttcga | caaataathtt  | gaggcagctt  | ataaagacca  | accattttggg | aggtcaatct  |
| 44641 | taggcacgca  | aaatactgta   | aaatcttttta | ctcgaggaga  | tctagataat  | tacataaatg  |
| 44701 | agcattactt  | tgggtgagaat  | atgctathtt  | ccgttgcagg  | aaatgttgaa  | catgaagaag  |
| 44761 | ttgttgcatt  | aaccaaagat   | tttctctcaa  | agattcattc  | taaaaagctg  | aaaaaaagcc  |
| 44821 | aaaatgcbag  | ctgtactggg   | ggtgagtatt  | tagaacatcg  | taaattagat  | caggtacact  |
| 44881 | tgctaattgg  | tctacctagt   | gtttctcgcc  | atgacgataa  | atatcacacg  | tttcaagtgc  |
| 44941 | ttgattctat  | attagggagc   | ggaatgtcat  | cacgtttatt  | ccaggaagta  | agggaaaagc  |
| 45001 | agggattagc  | ttactctggt   | tattcatttta | attccagcta  | tactaataca  | ggaatgtttt  |
| 45061 | ccattttttgc | tgggtacagac  | agtagtaact  | tagataagct  | tttaaaatct  | ataacgacag  |
| 45121 | agttgaagaa  | gttgtctaca   | gatgatctga  | aggaagaaga  | agtaaataga  | gtgaaagagc  |
| 45181 | gagtaaaatc  | ccaaattttta  | atgtcacgcg  | aaagtgttag  | ctcacgtgct  | gaaacattgg  |
| 45241 | gacactacta  | cggtaactat   | aataggtaca  | tcagtaaaaa  | tgaattaata  | gaaaaaatta  |
| 45301 | gtgcagttac  | cactgctaac   | gtaaaaaaaag | cagcagaaga  | attgttatct  | cagcatgaaa  |
| 45361 | aaaccactct  | agctgcaatt   | ggagaaaattg | aatcattacc  | aagttacgat  | aaagtgggtt  |
| 45421 | ctatgcttaa  | agcttagcgc   | attctattac  | attaatttgg  | ctactttaca  | attgaagcgg  |
| 45481 | tgtgctgtga  | actacacgct   | tctttttatat | tgcttctagg  | aggagatgat  | gatacttgac  |
| 45541 | cttgaggtgt  | agtgtctgct   | gcaggattca  | agtttatatt  | tttcttttgc  | tgaggataat  |
| 45601 | tccatgcttc  | ttcacgagtc   | tgaatatatag | gctctccatt  | attgtagttt  | cctcttacag  |
| 45661 | agtttgagtt  | tatgtctttc   | ttttgctgag  | gataattcca  | tgcttcttca  | cgagtctgaa  |
| 45721 | atataggctc  | tccattattg   | tagtttcctc  | ttacagagtt  | tgagtttatg  | tctttctttt  |
| 45781 | gctgaggata  | attccatgct   | tcttcacgag  | tctgaaaatat | aggctcccca  | tcattatagt  |
| 45841 | ttgagtttat  | attttccttt   | tgcgaaccag  | cgttcaataa  | tttcgatatc  | tctcgcccta  |
| 45901 | gctgatcacc  | tttataatta   | ttgttaagat  | ctttgatttt  | ctcctcacc   | aattccatta  |
| 45961 | ttcgaattag  | agaggtatca   | ataaaatccg  | tttttathtt  | gtcaatatct  | atcgatttat  |
| 46021 | taccataaat  | cgtaatttca   | cttttacctt  | tttcaactatt | cacatcatag  | ccttgctctt  |
| 46081 | taactcctgt  | tattacttcc   | ttcttttaata | atctatgaat  | agtattttatt | attttttgac  |
| 46141 | cacaatcttg  | aaaaaaatct   | ctgattgtct  | caaatgcctc  | taataaggag  | atggtttcag  |
| 46201 | tatgtgcgta  | ttttttacct   | agtgggtggct | cttcagcatt  | ctgggtgtata | gattctathtt |
| 46261 | gctgagggtc  | aagcatcatt   | gcattgacgtt | ttgagcgtgt  | tgggtgtgct  | ttggatgatg  |
| 46321 | acatgtcttt  | aatatcttgt   | tttttactct  | catcatcaac  | aaccacacca  | tcacttgatt  |
| 46381 | tccttttttt  | agtaggtaat   | gatgggtggct | cctcattatt  | ctgggatact  | gcattttaaat |
| 46441 | tcttaagttt  | aggaggtaat   | tgtgggtggct | tttcttcagg  | tgattgtctc  | tgagtgtctt  |
| 46501 | gaagattttg  | gtatataggt   | tcttcttttc  | ttaaattttc  | ataaattggg  | tcttgtacca  |
| 46561 | agtttagcatt | gacaaaactcc  | tgtactcttt  | ctagataaacc | aacatttttg  | tcctcttttag |
| 46621 | gtacttgaac  | gccttcaaat   | ttaatatattg | ttatatcttc  | aacactcagc  | ccattttctt  |
| 46681 | taagccatcc  | ccctcttttg   | ctcattgatg  | caacaaaactc | attaatcttt  | tgaatathtt  |
| 46741 | ttacatcatc  | atcaactagc   | atgacagttt  | ttggcaactc  | accgtgttta  | ttcttatact  |
| 46801 | tcacaattgc  | ctcacagatg   | tgcaaatctc  | ttccgacttg  | actttgtttg  | tctctaacat  |
| 46861 | ctaactcttg  | caactgatta   | tcataatctc  | ctggaaaacc  | accaaataca  | gaaatgctac  |
| 46921 | ctgtttgttc  | ttcaaataaaa  | cccaagtgat  | ccttttacaac | ctctttttaca | gcatccggat  |
| 46981 | attttgtata  | tgatgcaata   | ttaaacttcta | ttccacttga  | aagtgcagat  | tgcagtacag  |
| 47041 | attttaaccc  | ctctttathtt  | tttattccgt  | ctgtattttc  | tagaaaaatt  | tttatgtcgt  |
| 47101 | tatcagttgc  | tgcattathtt  | tgagtagaat  | taaagtcaact | tttgcttaac  | ctagaaagag  |
| 47161 | cattgtgcat  | gtgcccatta   | gtaatagtat  | tatcaaagtc  | aaatattaat  | agaacattat  |
| 47221 | tttttatatt  | catatctttta  | tctctaacat  | ttacaaaattc | aagacaaaagg | ctaacattaa  |
| 47281 | tagattaatt  | atttattata   | gcacttctga  | aggaaaaata  | ataaaaaggaa | gagttaacag  |
| 47341 | aatagacttc  | ttgcataaacc  | caaactaagt  | agaaaaaagg  | tatagctata  | ccgccgcggg  |
| 47401 | atctctagat  | cccgtctggga  | tgacgattgt  | cgtttagcca  | taaatattaa  | ggaatttacc  |
| 47461 | aaatgaaaaa  | aaaggcaaaa   | gaagccccgt  | ggtggttagc  | tattcactat  | gtactaaaaat |

|       |             |             |             |             |             |             |
|-------|-------------|-------------|-------------|-------------|-------------|-------------|
| 47521 | atcggcattt  | tttttattct  | aaaacgcttg  | attaagagcg  | atttagctgc  | ttttaacttg  |
| 47581 | caactaacct  | acaccgcaag  | tgtttaagaa  | atttaccaag  | caggaaaaaa  | ggcaaagaaa  |
| 47641 | ccctagggtg  | gctagtattc  | aaattctccc  | ttgtcaattt  | gacgtttttt  | gctgtcttaa  |
| 47701 | acgcttttga  | agcgcgtttc  | ggcttatata  | ggtaaaaacc  | cagaaatttt  | taaggacatg  |
| 47761 | cgatgcacgt  | agtgcgaaaa  | attaaacatg  | agacgccaaa  | taccctaagt  | tttttgtcat  |
| 47821 | taacctgcac  | agattgcgaa  | gataaataaa  | tagcttcagt  | accatgataa  | gggggctggc  |
| 47881 | ggagtttgct  | aagtaagttt  | tttcgtttct  | atttccaata  | aaagttcgtt  | atatggttat  |
| 47941 | gcaagaagtc  | taatgaagaa  | aagacttaaa  | gagaggccaa  | atcaaagtgc  | aatggtattt  |
| 48001 | cactaatcca  | attatttttc  | tcctgatcta  | gcctatcatc  | taatattgcc  | tgccttattg  |
| 48061 | atgccattaa  | cttattcata  | aagaaaatat  | tatgaatggg  | aacgagcgtg  | taagccagga  |
| 48121 | gctcttttag  | tttcagtaaa  | tggtgtatat  | aagctcttga  | atgttttctg  | caggtaaaac  |
| 48181 | ataaacagtc  | actttcaatt  | gggttatcgt  | ccagctcgaa  | ttgttgattt  | cgcaaattga  |
| 48241 | tatgctcttt  | gcactttgaa  | gaaatagaat  | ctctattttt  | tactttaatc  | agcgcaccac  |
| 48301 | catgccttgc  | taaacggggt  | ggatgcacgc  | aatcaaacgt  | atcaattcca  | agactaactc  |
| 48361 | cgcgaaagat  | gtccacaatt  | ccaccaatac  | caagcaaattg | agtaggcctg  | tcttttttca  |
| 48421 | agtggtccat  | agtgaagaa   | actacatcgt  | acatctgctc  | tttactttga  | ccaagtgatc  |
| 48481 | cacctattgc  | ttgaccgaaa  | aatggtaaat  | tggtgataaa  | atcacaactt  | tctctacgca  |
| 48541 | gatcgtgata  | tattccgcct  | tgactaattc  | catacagtgc  | ctgcttgcca  | ttattgtttt  |
| 48601 | tttcaaattc  | atttaaagaa  | cgttcagccc  | atctgtgggt  | catgagcatt  | gattttgctg  |
| 48661 | tgtattcttt  | gcttacgtga  | aatggagtgc  | attcatctaa  | aactaggatt  | aaatctgcac  |
| 48721 | ctaatttctg  | ttgaatttgt  | acagattttt  | caggagttaa  | gcaataaatt  | ttaccattaa  |
| 48781 | tgtaagaacg  | gaaaattgcc  | ccatcctcat  | taattttgat  | caaagttttt  | tgtttttttc  |
| 48841 | ttattccttt  | tatctcttcc  | gaaactgatc  | cgtggcctaa  | gctaaatatc  | tgatatccac  |
| 48901 | ctgagtcagt  | tagcattggc  | ccattccatc  | ctatcatctt  | gcgcaaacca  | ccaagttttg  |
| 48961 | caacagtatt  | ctctcctggg  | tgaagcatta  | gggtgatagg  | gttggaaggt  | atgatttggg  |
| 49021 | taccagcttc  | acttattctt  | tcaatatctg  | cagctttaat  | tgcagctttt  | gttgcgcaga  |
| 49081 | atataaaaag  | ggggggtttc  | acgcttccat  | ttggagtttt  | aattgttcca  | actcttgcat  |
| 49141 | aacctgattg  | cttgattctc  | ttgaatgaaa  | attcttcttt  | catctatttg  | cctgaaagtt  |
| 49201 | ctgttatgat  | gttttctact  | ttctcaggag  | taagattttc  | atagaagtca  | ttattgatct  |
| 49261 | gcacaacggg  | agcattaacg  | catgcaccta  | ggcattcaac  | ttctttttaa  | gtgaacaaat  |
| 49321 | tatcttttag  | agtctcaccg  | atattgattc  | caagtttttt  | tttaaagggt  | tttaaaactt  |
| 49381 | cttcactatt  | gcacaaccag  | caaggagtgt  | ttctacaaat  | ttgtattaga  | tatttgccta  |
| 49441 | ctggttttta  | attatacatg  | gtgtaaaaaa  | ttgccacttc  | atatacacga  | atatgtggaa  |
| 49501 | tatgcagcat  | atcagcaaca  | taacgcatag  | cagattcaga  | aacctatccg  | cattgctctt  |
| 49561 | gaaccagata  | tagtaaaggc  | ataacagcac  | taccttctct  | acctttggga  | tacatctcta  |
| 49621 | taaacttttc  | cgctttcttg  | aggttttctg  | atgtaaaaact | aaactgctct  | tctttttcta  |
| 49681 | tcattcatga  | aactcgtgta  | aactttaaca  | gattataacct | gtagaaccaa  | tgattgcaat  |
| 49741 | tgttggtttt  | ttgagaaata  | gcataaagct  | tcttagccct  | cttcaagctt  | atattttacct |
| 49801 | tttagtataa  | aatattatat  | taatttttta  | attttagtta  | aaattttcat  | tgacattaac  |
| 49861 | acacaggagt  | aatcataata  | gcatttttatt | aatatttttaa | ataaaaattat | gtctatatta  |
| 49921 | agaagattgc  | tcgggatcaa  | ctcaaataca  | ccggaaaatta | agaagcgat   | aggttttta   |
| 49981 | ccaacaaacg  | tagaattaat  | tgaggggaat  | ggagtgtgct  | acggactcag  | ctatcaagat  |
| 50041 | aatggtaatg  | ggagcagtaa  | agtaaaatta  | cttatttagtc | cattatatca  | atcaaaaaca  |
| 50101 | tacgaatgtg  | gtacaaaatat | cagcgtagca  | aatgaattca  | aagatcaatt  | atctctcaca  |
| 50161 | ttaatagaag  | attcagctga  | aatagataaa  | gttggtgagta | tcttttctga  | agaaggaatt  |
| 50221 | agcgaagaag  | gagaaaaatg  | cgttaaaggc  | ttatctttta  | acacttacgg  | aattaaacaa  |
| 50281 | tcagtttaata | ctccttcagt  | tgaacattta  | gataaaaagaa | aattacaaaa  | gaatattgat  |
| 50341 | aataatagtc  | ttgcaaatgt  | gggcaatagt  | tactttcaac  | caagagcagt  | gaaagtgggt  |
| 50401 | aatggtgacg  | taattgtaat  | cgcccataac  | ttaaaggatc  | aaacttttagt | ttcttggtac  |
| 50461 | ttaaagtcaa  | gcgagagcgg  | aaaattttaag | gtattgactg  | gagaaaaagg  | tggttacagaa |
| 50521 | agaaaattgt  | tcaattttga  | taatcagggg  | caattggcat  | taaatggaaa  | cacgatgctt  |
| 50581 | tattcgcaag  | tgagcaaaaag | gattactaag  | gaaaatcaag  | aggtgagaaa  | aacacgtatt  |
| 50641 | tttaaatttg  | atatggctaa  | agtgattcag  | gggtctgaagg | atggagttaa  | tggtttttta  |
| 50701 | cttggttaatt | gaaaagggtca | aatagataat  | aaagcactat  | ctcttttctag | agaacatgaa  |
| 50761 | ataagctttt  | tgcagtatgt  | tgaacaaacg  | gaaggaaaatg | atctagtgtg  | ttttcttgaa  |
| 50821 | aatgatcaat  | cagctaataa  | gcagaggtta  | catatagcaa  | ctctacttaa  | aaatggatca  |
| 50881 | gtgtcagatt  | ttcctatcta  | tcaattttaca | gatcctatag  | agcaattata  | tattaagggc  |
| 50941 | aacgggtcagg | gtgggttttat | cgtaactgcg  | gtaagtggag  | aaaatattgt  | aactttta    |
| 51001 | caaaacggct  | ctggaaaaatc | ttctgaagca  | acaataatac  | cggcaaatag  | catcaaaact  |
| 51061 | ctcagtgatt  | ttgttaatat  | cattaacgggt | cgattaacgc  | cagatattat  | ttctagtagt  |

|       |             |             |             |             |             |             |
|-------|-------------|-------------|-------------|-------------|-------------|-------------|
| 51121 | accgtggctc  | ctataactgt  | tgcagaaacg  | gttgtgactt  | ctaagaaaac  | gccgactgct  |
| 51181 | gcaattacta  | gcacagcaga  | aaccgacgct  | gtgaagacta  | ctaaattgac  | aacggaagcc  |
| 51241 | gttgcaccta  | cttctacaat  | aagtaaacct  | tcaacggagt  | caacgacagt  | agcaaaaaca  |
| 51301 | actactactt  | cacaagcgac  | cacggttgct  | acaacgtcaa  | ctagtgtgcc  | gatagtaact  |
| 51361 | tcagggactg  | agacaagtac  | tgtaaaacct  | acagcagcga  | ctgggtgcgtc | gacttctacg  |
| 51421 | atgagtaaac  | cttcaacaga  | gtcaacgact  | caaacaagca  | cagtaacagt  | ggaaccaact  |
| 51481 | gcgccaacaa  | caagctcaga  | gaaaactaca  | caaacagtat  | ttagtataacc | aagtactaga  |
| 51541 | acaaaagagt  | caacaactcc  | tatatccacc  | acgactttac  | ttcctcagtc  | tacttcttca  |
| 51601 | ccacaaccta  | ctcaacttgc  | tatagggtct  | aataaggcag  | gaatgatagg  | gggatccttg  |
| 51661 | gttggagcaa  | taggtattgt  | tgggaattata | ggattcatag  | catatagata  | tgttaagggg  |
| 51721 | cgtaatgctg  | cttctgtatt  | agaactaact  | gatttgggtt  | atagaaggcg  | atcatcttca  |
| 51781 | agtagcgatg  | aagaaatttt  | taccactggg  | aacagaatgc  | gaactatata  | tcaatctgaa  |
| 51841 | acagtgctaa  | atagtatatc  | agtagaaagt  | agtagtcgat  | caagaagtag  | ctcatcgtct  |
| 51901 | tcaagcgggtg | gaccaggtct  | ttgactaact  | gaagcggagt  | ctaaaagtga  | aaaaagctta  |
| 51961 | tcttgggata  | gtgatgatgt  | gccggaatat  | cacctttagc  | tatttgtcta  | aatgttttta  |
| 52021 | atatgtagac  | tgttaggaaa  | ttgtcttttg  | cttttgtgat  | tttcatgtta  | aagtataatt  |
| 52081 | cctaggtgaa  | ataagtagct  | gctgttgtgt  | gataaacata  | gcagaggaaa  | gtccgggctc  |
| 52141 | caaggaaaaa  | tagtgacggg  | taatgccgcg  | cggaggtaac  | tccagttata  | gggctacaga  |
| 52201 | aaattaccgc  | ctaaaatatt  | tttaggtaag  | ggtgaaaagg  | tgtggtaaga  | gcacaccatg  |
| 52261 | gcaatggcaa  | cattggtagt  | cgagtaacca  | acactaggag  | caagattaaa  | tagaagtaga  |
| 52321 | ttttatgttt  | tcctcatatc  | tactcgggta  | aatcgcatgc  | ggtaaattgg  | aacatttact  |
| 52381 | ccagataaat  | agctacataa  | acagaactcg  | gcttatattt  | cacctaggcg  | ttcacatgat  |
| 52441 | acgtgcgata  | taagccatgc  | tatatttaaa  | tgtgtaggca  | tttcatgcgt  | tgtccttcac  |
| 52501 | ttgttctgct  | tgatagccat  | cactactttc  | gcctacatta  | acattagaat  | attcatcatc  |
| 52561 | atcaatatac  | tctttcagaa  | cataccctct  | gccccaaacg  | gtttctatgt  | ggctttttcc  |
| 52621 | atcatttgca  | ctttcaagtt  | tcttacgtaa  | tttgcacata  | aaaacatcaa  | ctatcttggt  |
| 52681 | atctgaaggt  | tcactctaagc | cattgtaaag  | atgattttaag | aacatttctt  | ttgttaatac  |
| 52741 | tgttccttta  | cgcagtgcta  | gcaattctat  | catagaatac  | tctttattag  | taagggtgaac |
| 52801 | cgttttacct  | ttcacctcaa  | caatcctgtg  | atcaaaaattg | atattttatat | taccaatctt  |
| 52861 | tatcaccgat  | tcaggatggc  | ctttagtagc  | acgcactatg  | gccttaattc  | gagctaataa  |
| 52921 | ctcactttta  | tgaaatgggt  | tggttaagta  | atcatcggca  | ccatacccca  | gtccttttagc |
| 52981 | tttgtgattg  | acagcggata  | tacatgaaag  | tattaagaca  | ggaactttga  | tttttgcact  |
| 53041 | tcttagtctt  | agcaatatat  | catatccgtc  | aatatcacca  | ggcaagtgtg  | tatctaaaat  |
| 53101 | aactagggtca | tagtaatctc  | cgtttgagga  | aaccatatta  | ttgtttataat | cttgtgcaga  |
| 53161 | agtaacaacg  | tcacagaaat  | gtccatcaga  | agttaaggcg  | ttaaccacag  | tctttgcact  |
| 53221 | tacttgatca  | tcttcaatta  | ataatatacg  | catatttttac | accccataaa  | taattttataa |
| 53281 | ttttagtaat  | atatataact  | aaggaaaagta | ataaatcaaa  | tttttattaa  | caaatgatca  |
| 53341 | aaattacact  | tattaattaa  | tagtaaatat  | attgtttccaa | agttatataa  | atagatctaa  |
| 53401 | aatataatag  | acataccatg  | atagtaataa  | tattttttagt | aaatattgaa  | ttaaagttac  |
| 53461 | tattattaaa  | agaatacttc  | ggttaataaaa | tattttaacta | ttctatatgt  | ctgtgttata  |
| 53521 | tttttaattt  | acttatccta  | ctattttaaa  | gtataagtaa  | tatttttcagg | aatattgtgt  |
| 53581 | ggcaatatca  | attttaggtg  | ctgggtgcag  | gggtacagca  | atcgcaattt  | cattaggtag  |
| 53641 | taagaaagat  | gtgattttgt  | ggactcgcaa  | tgaaactaca  | tttgaatcaa  | tcaacgggaa  |
| 53701 | aagagaaaag  | gacaagctac  | cgggttgtcg  | aattttctgat | aatgtgtcag  | taaaattggc  |
| 53761 | tattgaagac  | acaattaatg  | cttcagtaac  | aatcctcgct  | gttcccactc  | agtctctgag  |
| 53821 | gaaggtagtg  | cagcaattgc  | ataattgtaa  | tctgaaaaaa  | gatgtagcaa  | taatttttagc |
| 53881 | ttgtaaggga  | atagaaaagt  | ctacattaaa  | attacctagt  | gaaatagtaa  | atgaaatttt  |
| 53941 | acctaacaat  | cctattgcta  | tttttttcagg | tcctagcttt  | gctgtagaag  | ttgcaagaaa  |
| 54001 | attaccctat  | tcaatgggtc  | ttgcatgcca  | aaataacaca  | ttaggttcaa  | agctagtatc  |
| 54061 | agagctgcaa  | caagaaaatg  | ttaaattgga  | gttttagtaac | gacattatag  | gagtacagat  |
| 54121 | ttgtgcagcg  | ttaaagaacg  | tttttgctat  | agcgtgtggg  | attgtttctag | gtagtaaact  |
| 54181 | tgggtttta   | gctcatgcag  | cattgattac  | gaaaagtatg  | agcgaaatta  | aggctttata  |
| 54241 | ctcagcaaaa  | attgggtgacg | gtagtgtgga  | tataaataca  | ctacttgggc  | cagcatgtct  |
| 54301 | gggtgaccta  | attatgacat  | gcacatcctt  | gaattcaaga  | aacttatctt  | ttgggtttaa  |
| 54361 | aataggtaat  | agtgataatg  | gctttaatgt  | tcagcagatt  | ttgtcagaag  | gcaagtcagt  |
| 54421 | gattgaaggt  | tttagcactg  | ctgagtcctt  | atttaattta  | gcaggaaaagc | taaagataaa  |
| 54481 | aatgcctata  | tgtgaagcgg  | tctatagatt  | attgtatgaa  | agcgccctcta | tagaggatac  |
| 54541 | tattttctggt | cttataagtt  | aatttttgtat | ttggatatat  | tgtgaaattt  | ttatataaat  |
| 54601 | taatatacaac | gtggtggctg  | tctggaacag  | taaaaaaaaa  | gccagggtact | gtgggttagtt |
| 54661 | tggcttcttt  | tccgcttggt  | cctgtaatcc  | tgagcaacaa  | aatttttaggt | gcagcaatta  |

|       |             |             |             |             |             |             |
|-------|-------------|-------------|-------------|-------------|-------------|-------------|
| 54721 | tttctttttt  | attctttaatt | ggattatggt  | ctacaggtaa  | ttatataaaa  | cattacaaga  |
| 54781 | cttcatgtga  | tccaaaagag  | gtagtaattg  | acgaagtgg   | tgggtcaattg | ctgacgatac  |
| 54841 | tttttagttt  | gatattgtta  | agccaagaga  | tgaattattc  | ttcattgttg  | ttgtgctttt  |
| 54901 | tttcttttag  | gttttttgat  | ataataaaaa  | cgtggcctat  | aaattttaatc | gataaaaaata |
| 54961 | ccaaaggtcc  | tttaggtatt  | atgctagatg  | acgttatagc  | tgcaattttta | gcctgtgttc  |
| 55021 | ttataggagc  | cttttattgt  | ttattgttgg  | tgtatgcagg  | ataaaaaaat  | ttattattca  |
| 55081 | agcttaattg  | ttcaaaatct  | aaaggattat  | atactgtaca  | cagcgaattt  | atctgagtgg  |
| 55141 | gaagtacacg  | atgaatttga  | taacatcata  | tttacaataa  | atggtaccag  | ggagtcatta  |
| 55201 | tttaattttg  | tgttctgtgg  | agatcaatgt  | accgagcttt  | ctatacaaaa  | aactctagat  |
| 55261 | tatctcagaa  | caagagatat  | agaagcaaca  | tgggtaataa  | attcacatat  | gaaaataaga  |
| 55321 | gatatttttag | aaaagtgtga  | aataaaaacac | gtagcacac   | caaaaaaagc  | tttacttaat  |
| 55381 | atgaaaaatt  | actttttacc  | tgctgatgtt  | attccaaact  | tgaggttaaa  | tgctgtgaat  |
| 55441 | ggtagcaacc  | tcttagaaca  | gtagatcta   | cacacttcta  | aaatttttta  | tcatggcggt  |
| 55501 | ggaattgtca  | gcacattttt  | tcgcggatta  | tcaaattatg  | atgataagaa  | ctcaagatta  |
| 55561 | agattttttc  | ttgtaacact  | aaataatgaa  | attattggga  | catgcgggtc  | ttatgttcaa  |
| 55621 | gatagcgtag  | ctgggttttta | tagtgatgga  | gttttacc    | tttacaggaa  | tcgtggaata  |
| 55681 | ggtacccaaa  | tgggttttaga | aagaataaag  | atagctaaac  | agcttgaatg  | caaatatata  |
| 55741 | gtagcacatt  | gtatgaaatc  | ttctgtgaac  | ctttataaga  | gattgggctt  | tcaaagtgtt  |
| 55801 | ggcaatcttt  | acttatatac  | ctcttcagca  | taattctgag  | cggttacaaa  | tttttacatt  |
| 55861 | tgtttttaaaa | gtgctatgtt  | ttttttgtat  | gaagtgggtt  | taatattgat  | tctaataatta |
| 55921 | ttctttctct  | cttattctaa  | attaaaaatt  | agtaataaga  | ttaagaactt  | acagcatcaa  |
| 55981 | aatgtttatca | taaataattt  | gattgatact  | gtgaatgatg  | ggttttatat  | ttgggatgca  |
| 56041 | aaaaaacgta  | tagaaaagtt  | ctctcccaat  | ttactaattt  | tgcttaatac  | tgttttttac  |
| 56101 | tcattttaatg | agtttgtgaa  | tttttttgag  | caatcagaaa  | gcttaatcaa  | aaattttgtt  |
| 56161 | gaggcaaagg  | aaataaataa  | atcttttact  | ctagatttaa  | agtcaaaaaga | cagtgtgaggt |
| 56221 | tattgcatat  | gttacggtag  | aagcataata  | gatgattcta  | acaatgtgat  | aggtgtgctg  |
| 56281 | ttatggataa  | ggaatgtctc  | agactgtaag  | ataaaggcta  | acggacttga  | gttagaaaat  |
| 56341 | agtaagctta  | cacaggaagt  | ggagagctat  | aaaaacgttt  | tcaactcttt  | accatttcca  |
| 56401 | atactaagat  | ataacaagag  | tagaaagggtg | gaattttata  | acttgtttta  | tgataaatat  |
| 56461 | gtagatgggt  | ctaagaaatt  | tgctattacc  | ggtagcgcctc | atagcacaaa  | accaggaaga  |
| 56521 | catgtcataa  | cttataagaa  | cgaacctaag  | gttttcgatt  | ttgttaaaat  | tccaatacaa  |
| 56581 | ggttctggta  | gcatagtaat  | gtatgggaaa  | gatgttagtg  | atgcagagaa  | attatatact  |
| 56641 | gaattaaaca  | gttattttagc | tacacagaaa  | aatttgcttg  | agaggttacc  | ggttgctata  |
| 56701 | gtaatataata | gtaagaatca  | aaagctaaaa  | ttttataata  | atgcttttat  | aaaaaccttt  |
| 56761 | caatttgacc  | caaaattttt  | ggcatcttac  | ccaacttatc  | acgaagttaa  | gctttacctc  |
| 56821 | ttcgaatcta  | aaaagctttt  | agaaaaagag  | gatttttcaa  | ctattagtaa  | ccaaagacat  |
| 56881 | gagttgttca  | aaaaattatt  | tgaatcgtac  | gatgatacga  | tgcaacttcac | aaacggaaaa  |
| 56941 | gcgttcagg   | tattaacaat  | accctacgct  | tcggaagggt  | tgctgttctc  | ttacgaagaa  |
| 57001 | tgcaaaagat  | aatacttaaa  | ctccttctct  | ctctaccatg  | agctgtttta  | ctttcgctat  |
| 57061 | tgctcttgct  | ggattaagtc  | ctttaggaca  | agtttttgtg  | caattcatta  | ttgtatgaca  |
| 57121 | acgatacaac  | ttgaatgggt  | cgttttaaac  | atcaagtctt  | tcacctgtct  | tattatcacg  |
| 57181 | gctgtcagca  | atccatctgt  | aagcttgtaa  | tagtattgct  | ggtcctaaaa  | atttatcact  |
| 57241 | attccaccag  | tagcttgggc  | aaccagtcga  | acagcaagca  | cataatatac  | agtcggacaa  |
| 57301 | gccatctaata | ttttttctat  | cttcagaaga  | ttgagagtat  | tctttatttg  | gtagggcagg  |
| 57361 | cttatctgct  | tgtaaccaag  | gtttaattga  | tttgatttgc  | tcataaaaat  | ggctcaaadc  |
| 57421 | cgagactagg  | tcctttatta  | catacatgtg  | aggtaatgga  | tatatatttt  | cgtcaccttt  |
| 57481 | tatatcatgt  | atagatctag  | tacatgcaag  | agtattgggt  | ccgtcaatat  | tcatggcaca  |
| 57541 | agatccacat  | atgccttctc  | tacaagaacg  | tctgaaagt   | aaagtcgaat  | ctatttcatc  |
| 57601 | ctttattttt  | attaatgcat  | caagtacat   | agggccacaa  | ctatccatat  | caataaaaaa  |
| 57661 | tgtgtctatt  | ctaggggttt  | tctcgtcatc  | agcagaccaa  | cggtaaaatt  | gaaatcttct  |
| 57721 | gatgtttttt  | gctctagcag  | gaataggata  | aattttgccc  | ttttgattaa  | ttttagaatt  |
| 57781 | ctttggcaaa  | gaaaactgaa  | ccatatcact  | taccttttat  | tgtttatagc  | taaaaccctt  |
| 57841 | tgtagataac  | atattttatt  | atcatctact  | atatttttat  | taaatttcct  | ttaaatcgca  |
| 57901 | cacatattgt  | agccaagcga  | agctaaaatc  | tctctttcta  | gatttttcat  | tataatttct  |
| 57961 | tcatcttttt  | tttgggtgatc | ataaccaagt  | aaatgcagta  | atccatgcac  | taacatgtgt  |
| 58021 | gcaatgtgag  | caagaatggg  | tatataatac  | tcatgcgatt  | ctctttttat  | tgtgtctatt  |
| 58081 | gaaattgcta  | tgtctcctaa  | atcgcaactc  | ttagacaatt  | gttcatacgg  | aaatgatagt  |
| 58141 | acgttagttg  | gcttatccat  | ttctctaaat  | tttaaattaa  | gttgatgtag  | caagtcatca  |
| 58201 | tcagccagag  | ctattgatata | atttgggttta | tagtgggtcta | tttttaattc  | tttttagagaa |
| 58261 | gcattgatga  | cacctaatat  | aaaatttttta | ggatttttcta | taatgctgca  | ccatttcttg  |

|       |            |             |             |            |             |            |
|-------|------------|-------------|-------------|------------|-------------|------------|
| 58321 | tcaagaatat | ttactttctaa | catgagtgac  | acatcagtaa | gggtgtcatg  | caaatagctg |
| 58381 | acactggaat | ccaaaaaaga  | agagttatag  | acccttgtgt | catgtacaca  | actgtacgaa |
| 58441 | tattgtacac | tagaaggatg  | tcatcccagt  | gtctaggcac | tgggatccag  | gaattttgat |
| 58501 | tagacatcaa | gttagtgaat  | ataaaagtag  | ctaattctat | attaaaacac  | aacggcttta |
| 58561 | atgtggttgc | attaaggctg  | gattccagtg  | tcaagcactg | gaatgacacc  | tttgtgtttg |
| 58621 | atgcaaaatc | ggctataacg  | tttaatgcac  | tgccttcgag | acaaatatcc  | atacagctgt |
| 58681 | gcgttgtgtg | ctgagatgac  | atcatttagg  | aactgaaatg | acaggtatta  | cacatcactc |
| 58741 | atccttatta | tttcattcca  | ttcaatttcc  | gaaactgggg | caattgataa  | acgtggttgt |
| 58801 | tttaatatag | tcataattttt | caaaagtggg  | ttttgtttta | tattatttta  | cgttacttgg |
| 58861 | ttattttaag | gtttcaaaaa  | ctttacattc  | actaatccga | acttgggatc  | attaacatga |
| 58921 | taatactctt | taaatacttc  | aacgattcca  | agtattgctt | tctctttacc  | tgtatgataa |
| 58981 | aaaaacgcaa | gatcgcttgc  | tttcataatt  | ttcatgtaat | tttgagcttg  | ataattgcgc |
| 59041 | acaccatccc | actcaactac  | ctgctccttt  | tccatttttt | gccatgagta  | ttcacttggc |
| 59101 | tctgacttaa | gtagccaaaa  | ttgcattatt  | tttttcttct | taagtaagct  | ggatatcat  |
| 59161 | agatattgct | gccccactta  | gtccttctgc  | ttacctgttc | agctgggttt  | gtttccagtg |
| 59221 | ttttgtcttg | tgtactttca  | ctttgactat  | atggccactt | aaatttctct  | ttctctgagt |
| 59281 | cttcgctctg | acttataggt  | gaagtttctg  | atttattatt | gcgaccatca  | atgccagttg |
| 59341 | caagaacaga | aactctaact  | cttcctcca   | tcgcttgatc | aaaagtagca  | ccaaatatta |
| 59401 | tatttgcatt | ttcatctact  | tcttcacgca  | ctctattggc | tgcagcatca  | acttcaaaca |
| 59461 | gagtcatatc | tccgccacca  | gtaatgttaa  | ttaatatcc  | ttgcgcacct  | ttcattgata |
| 59521 | cattatcaag | caatggatta  | gatattgcag  | cctctgcagc | actaattgct  | ctatcttctc |
| 59581 | cttctgcctc | tccggtgccg  | atcatcgctt  | tgcccatctc | gctcattact  | gtttctatat |
| 59641 | cagcgaagtc | aagattgata  | agccctggca  | tgaccatcaa | gtcagttact  | cctctgatgc |
| 59701 | caatgtgcag | aacattatca  | gcaagtttaa  | atgcatcaga | aaatgtagtt  | ttttcatttg |
| 59761 | caattctaaa | taaattctga  | tttggaatga  | caataagtgt | atccacgtat  | ttttgcagtt |
| 59821 | cttcaagtcc | aagctctgca  | atgcgcatac  | ggcgcacacc | ttcaaaaccg  | aacggtttag |
| 59881 | ttacaactcc | aacagtcaat  | atcttttttt  | cttttggcgc | tctatcctta  | actgcggctc |
| 59941 | ttgcttctct | ggctgctttt  | gcaattaccg  | gtgctgcacc | ggttccagta  | ccaccgccca |
| 60001 | ttcctgctgt | gatgaaaagc  | atatgactat  | cttttatatg | ctccataatc  | tcatcaattg |
| 60061 | actcttctgc | tgcacctttg  | ccaacatcag  | gcaaagcacc | agcaccaagc  | cccttagtta |
| 60121 | aattaatgcc | aagctgaatt  | tttttatcac  | ataacgactt | ttctagtgt   | tgagcatcgg |
| 60181 | tatttgcgac | aacaaaattc  | actccttgca  | aattagattg | gatcatgtta  | ttcacagcat |
| 60241 | ttccaccagc | accacccact  | cccacaacgg  | taatccttgg | gtgcaatata  | ggtaactccg |
| 60301 | gcagactaag | atcaatagac  | attttaaatta | ctcaaattta | gcgaattcac  | ttgataataa |
| 60361 | gttaccgctt | ttttaataat  | atgcaaatac  | ttttcacttc | tatgggcgta  | aacagtaaac |
| 60421 | gggatttact | tattcttaac  | atttatacta  | ataagtgccg | ttaattataa  | taactagatt |
| 60481 | cttagatgac | atcacttaac  | cgatgcaaaa  | aatagaaaac | gtttataaaa  | agggacagaa |
| 60541 | acctatccct | ttttattttg  | ttaaagatta  | ttagcttcct | tatctttctc  | ttcccctttc |
| 60601 | aatgcttcaa | ccgcaacatc  | ttttaatttt  | gaggcaattt | gatatgttcc  | ataaagaaca |
| 60661 | gcagctgcag | caattgccat  | tatggcaccc  | gcaactatct | gaccagcaat  | acctgttccg |
| 60721 | ataaatccag | gtaatgaagc  | agctattgct  | tgattttgtc | caacaaagta  | actggcagtc |
| 60781 | ttagcaagaa | acccagaagc  | ttctgctgca  | ctaacaaagc | ctgctttcat  | atgcattgct |
| 60841 | gtaaagacaa | cacttgcaac  | tgcaagcgga  | aataatgctg | ttctcccttt  | attatgcata |
| 60901 | gcgtactgac | cagctccacc  | agcagcacca  | ggaattcccc | agtatttttc  | agctcgtata |
| 60961 | tatccttctg | aaatagcatg  | aaaaatgcca  | tccccttttc | tatactcata  | atttgttaat |
| 61021 | gccataactc | tactccttaa  | atagaatgtt  | aaaatttcat | taaggaagca  | tatagtaaaa |
| 61081 | aaaattgcct | gtcaagtaaa  | ctaatttttt  | aatatacctt | tattctgtga  | ttgagcgctt |
| 61141 | cagcaatgtg | tgtctttttt  | acttcttcac  | tttttgcaag | atctgcaata  | gttcttgcaa |
| 61201 | cttttaatac | gcgtgtgtag  | cctcgattgg  | aaatgtaatt | ttctttcagt  | acgtatttta |
| 61261 | gcaattctaa | ccctgcctga  | tctggttcag  | taaatttatt | aaatgcttca  | ccgcttactt |
| 61321 | ctgaattgca | acgaatat    | aattcactat  | agcgctcagt | ttgaactttt  | cttgctgcta |
| 61381 | tactcttttc | tcttatgatt  | ttagtacttt  | ctccctccac | agagatttca  | ggagagagta |
| 61441 | tgctaacgtt | tggcattttca | atgcatatgt  | ctattctatc | aagcaatggg  | cctgatattt |
| 61501 | tgtttttgta | atctgtgccca | cactttggag  | ctttgttgca | cgatctgctt  | gcatcaccta |
| 61561 | aataaccgca | cctgcaaggg  | ttcattgcag  | caatcagttg | aaaatttgca  | gggtaggtta |
| 61621 | tgtgagcatt | tgcccttgca  | acggtaactt  | ttctatcttc | aagtggttgg  | cgcagagaa  |
| 61681 | caagcacaa  | tcttggaat   | tctggcaact  | catcaaggaa | taacacgccca | ttgtgagcca |
| 61741 | tggtaatttc | tccagggtttt | gcattctttc  | ctccccctat | catcgctggc  | atagagcatg |
| 61801 | aatgatgagg | ttcacgaaag  | ggacgagtta  | ctttgaatat | ttcattacca  | gtttttgtta |
| 61861 | tgctggaaat | aatattaaca  | tcaattatct  | cctgttcggt | taaatcaggc  | agcaatccta |



CDS 257..625  
 /locus\_tag="wEsol\_01802"  
 /codon\_start=1  
 /transl\_table=11  
 /product="DNA-directed RNA polymerase, sigma subunit (sigma70/sigma32)"  
 /pfam="DDE\_Tnp\_ISL3 Sigma70\_r2"  
 /translation="MLLKHELKKIILLKINENQSSFTGELKNKFLRFIDNSEHIASILNGIKQHIQEDNVQEFKELIRRIQKHEREVSEAKQEMTKANLRLVVSIAKKYSKRGLDLLDLIQEGNIGLMKAVALGG"  
 /cog="RpoD COG0568 342 DNA-directed RNA polymerase, sigma subunit (sigma70/sigma32)"  
 /besthit="qcoverage 96.7213114754098 , hcoverage 46.09375 , similarity 97.5 , identity 95.8 , evaluate 1.44e-64 , alnlength 118 , Bacteria , Proteobacteria , EAL58124.1 RNA polymerase sigma factor RpoD [Wolbachia endosymbiont of Drosophila ananassae]"

gene 685..1041  
 /locus\_tag="wEsol\_01803"

CDS 685..1041  
 /locus\_tag="wEsol\_01803"  
 /codon\_start=1  
 /transl\_table=11  
 /product="RNA polymerase sigma factor RpoD"  
 /pfam="Sigma70\_r3 Sigma70\_r4 Sigma70\_r4"  
 /tigr="TIGR02393 RpoD\_Cterm 238 RNA polymerase sigma factor RpoD"  
 /translation="MVEVISKINRALRKMTHEMGREPTLEELSVELTMPLERIRKVMKIARDLVSLEAPTGKDDSSFTGDCIEDKRVSRPEHAAILADLRGITTNVLATLTLPKENRIILRMCFGLVKMGRSIP"  
 /cog="RpoD COG0568 342 DNA-directed RNA polymerase, sigma subunit (sigma70/sigma32)"  
 /besthit="qcoverage 97.4576271186441 , hcoverage 62.8415300546448 , similarity 94.8 , identity 93.0 , evaluate 6.97e-65 , alnlength 115 , Bacteria , Proteobacteria , EAL60191.1 RNA polymerase sigma factor RpoD [Wolbachia endosymbiont of Drosophila simulans]"

gene 1365..1697  
 /locus\_tag="wEsol\_01804"

CDS 1365..1697  
 /locus\_tag="wEsol\_01804"  
 /codon\_start=1  
 /transl\_table=11  
 /product="hypothetical protein"  
 /translation="MTNKNDNSNSKYRNFYVLGDSLSDNGAIIGILNNLCFAKSVKFD DPFYQGGSFSGPTAVEYVAKYLDLDEFKPGWSYSIFGKCHEQQGQNYAVSCATASEI FNPIFILS"  
 /cog="COG3240 COG3240 370 Phospholipase/lecithinase/hemolysin"  
 /besthit="qcoverage 97.2727272727273 , hcoverage 69.4805194805195 , similarity 97.2 , identity 94.4 , evaluate 4.29e-69 , alnlength 107 , Eukaryota , Arthropoda , GFQ81579.1 GDSL family lipase [Trichonephila clavata]"

gene complement(2993..3187)  
 /locus\_tag="wEsol\_01805"

CDS complement(2993..3187)  
 /locus\_tag="wEsol\_01805"  
 /codon\_start=1  
 /transl\_table=11  
 /product="hypothetical protein"

```

/translation="MCLYNMGVKLKVLIRILKGSCGSCICEGVFEISTKMWDQGDPEH
NLSGTANLFIYAIPRTVFLP"
gene      complement(3608..3751)
          /locus_tag="wEsol_01806"
CDS       complement(3608..3751)
          /locus_tag="wEsol_01806"
          /codon_start=1
          /transl_table=11
          /product="hypothetical protein"
          /translation="MNGVNEYFKMEWALVLWVDGFSKYRYKGGPGVTLEFVCTIWVSN
EMC"
gene      complement(5410..5931)
          /locus_tag="wEsol_01807"
CDS       complement(5410..5931)
          /locus_tag="wEsol_01807"
          /codon_start=1
          /transl_table=11
          /product="hypothetical protein"
          /pfam="Lyase_1 FumaraseC_C"
          /tigr="TIGR00979 fumC_II 458 fumarate hydratase, class
II"
          /translation="MKIANDIRLLGSRPRCGIGEIMLPENEPGSSIMPGKVNPTQCEA
ITMVCTQVMGNHVAVIISGSNGHFELNVFKPVIIYNVLQSIIRLLAAASLNFTEKCVVG
IKANEERIKDLLNQSLMLVTILNTHIGYDNAAKIAKLAYKENITLKEAAAKLQLLTEE
EFEMIVKSEEMVN"
          /cog="FumC COG0114 462 Fumarase"
          /besthit="qcoverage 100 , hcoverage 50.2906976744186 ,
similarity 97.1 , identity 96.5 , evalue 7.72e-108 ,
alnlength 173 , Bacteria , Proteobacteria , EAL58737.1
fumarate hydratase, class II [Wolbachia endosymbiont of
Drosophila ananassae]"
gene      complement(6170..6799)
          /locus_tag="wEsol_01808"
CDS       complement(6170..6799)
          /locus_tag="wEsol_01808"
          /codon_start=1
          /transl_table=11
          /product="hypothetical protein"
          /pfam="Lyase_1"
          /tigr="TIGR00979 fumC_II 458 fumarate hydratase, class
II"
          /translation="MDRKTRIESDSLGEVKVPSEHYWGAQTQRSLENFKIGTEKMPEP
LIKALAIIVKLAAARVNMKQGSIDNKVGDAICAAAREVIDGKFNFPLVWVWQTGSGTQ
TNMNMNEVISNRAIEILGGNLGSKSPIHPNDHVNYGQSSNDTFPTAMHIAAAEQINCL
LIPNLEKLHKVLDNKVQEFKNIIKVGRTHFQDVTPLTLGTGVFWLWCSPD"
          /cog="FumC COG0114 462 Fumarase"
          /besthit="qcoverage 95.2153110047847 , hcoverage
42.8879310344828 , similarity 99.0 , identity 99.0 ,
evalue 3.45e-134 , alnlength 199 , Bacteria ,
Proteobacteria , MBV2146228.1 class II fumarate hydratase
[Wolbachia endosymbiont of Pissodes strobi]"
gene      complement(7142..7483)
          /locus_tag="wEsol_01809"
CDS       complement(7142..7483)
          /locus_tag="wEsol_01809"
          /codon_start=1
          /transl_table=11
          /fullproduct="qcoverage 100 , hcoverage 100 , similarity
98.2 , identity 97.3 , evalue 3.93e-73 , alnlength 113 ,
Bacteria , Proteobacteria , MBV2145176.1 hypothetical

```

protein [Wolbachia endosymbiont of *Pissodes strobi*]  
 /translation="MKSFLRNFLHYLLSSQCPDYLDPYLLFSGHALPRTWCKRILLTL  
 LLILFPLASSISIEDIEENCNYEYYPKLDSSSADELHVIKRNYYRYGEELKILADER  
 IKEITLGTSDK"  
 /product="hypothetical protein"  
 /besthit="qcoverage 100 , hcoverage 100 , similarity 98.2  
 , identity 97.3 , evalue 3.93e-73 , alnlength 113 ,  
 Bacteria , Proteobacteria , MBV2145176.1 hypothetical  
 protein [Wolbachia endosymbiont of *Pissodes strobi*]"  
 gene complement(7643..7828)  
 /locus\_tag="wEsol\_01810"  
 CDS complement(7643..7828)  
 /locus\_tag="wEsol\_01810"  
 /codon\_start=1  
 /transl\_table=11  
 /product="hypothetical protein"  
 /pfam="GcpE"  
 /tigr="TIGR00612 ispG\_gcpE 357  
 4-hydroxy-3-methylbut-2-en-1-yl diphosphate synthase"  
 /translation="MEEKNPGVEHMSIAVMGCIVNGPGESKHANLGISLPGYGEKPV  
 AVYKDGKYFKTLQGDNV"  
 /cog="gcpE COG0821 361 1-hydroxy-2-methyl-2-(e)-butenyl  
 4-diphosphate synthase"  
 /besthit="qcoverage 98.3606557377049 , hcoverage  
 37.2670807453416 , similarity 98.3 , identity 90.0 ,  
 evalue 1.33e-32 , alnlength 60 , Bacteria ,  
 Proteobacteria , WP\_162198782.1 flavodoxin-dependent  
 (E)-4-hydroxy-3-methylbut-2-enyl-diphosphate synthase,  
 partial [Wolbachia endosymbiont of *Operophtera brumata*]"  
 gene complement(7804..8331)  
 /locus\_tag="wEsol\_01811"  
 CDS complement(7804..8331)  
 /locus\_tag="wEsol\_01811"  
 /codon\_start=1  
 /transl\_table=11  
 /product="hypothetical protein"  
 /pfam="GcpE"  
 /tigr="TIGR00612 ispG\_gcpE 357  
 4-hydroxy-3-methylbut-2-en-1-yl diphosphate synthase"  
 /translation="MDENSSLNSRPSDVALRKALVMSALDSAKKAEEIDLNSNKII  
 SCKVSKVQDLILVYMALAKSSNYALYLGTEAGMGNGVNTAAGLTYLLQNGIGDTI  
 RASLTQRPGESRTNEVVVCQEILQSIGLRHFNPPQGNSCPGCGRTSSDRFRILTEEVNG  
 YIKTHMPMWKKKIQV"  
 /cog="gcpE COG0821 361 1-hydroxy-2-methyl-2-(e)-butenyl  
 4-diphosphate synthase"  
 /besthit="qcoverage 98.2857142857143 , hcoverage  
 40.3755868544601 , similarity 98.3 , identity 97.7 ,  
 evalue 1.75e-108 , alnlength 172 , Bacteria ,  
 Proteobacteria , WP\_209472694.1 flavodoxin-dependent  
 (E)-4-hydroxy-3-methylbut-2-enyl-diphosphate synthase  
 [Wolbachia endosymbiont of *Wiebesia pumilae*]"  
 gene complement(8368..8892)  
 /locus\_tag="wEsol\_01812"  
 CDS complement(8368..8892)  
 /locus\_tag="wEsol\_01812"  
 /codon\_start=1  
 /transl\_table=11  
 /product="hypothetical protein"  
 /pfam="GcpE"  
 /tigr="TIGR00612 ispG\_gcpE 357

4-hydroxy-3-methylbut-2-en-1-yl diphosphate synthase"  
 /translation="MLDKDLILNDDAYELLPISRHKTHVVEVGKVKIGNNPIVVQSM  
 ALGVHIDSDNIKSSAKHYAKEITELARTGSELVRIALNSEEVARAIPYIVEEINKEGF  
 DGKILVGCQYELDKLVPDYPYNIKMLGKIRINPGNIGFGDKRDEKFERVIEYAIMHN  
 LPVRIGVNWGSLNK"  
 /cog="gcpE COG0821 361 1-hydroxy-2-methyl-2-(e)-butenyl  
 4-diphosphate synthase"  
 /besthit="qcoverage 100 , hcoverage 40.8450704225352 ,  
 similarity 98.9 , identity 98.3 , evaluate 7.26e-115 ,  
 alnlength 174 , Bacteria;Eukaryota ,  
 Proteobacteria;Arthropoda , MBV2145175.1  
 flavodoxin-dependent  
 (E)-4-hydroxy-3-methylbut-2-enyl-diphosphate synthase  
 [Wolbachia endosymbiont of Pissodes strobi]"

gene complement(8918..9241)  
 /locus\_tag="wEsol\_01813"

CDS complement(8918..9241)  
 /locus\_tag="wEsol\_01813"  
 /codon\_start=1  
 /transl\_table=11  
 /product="hypothetical protein"  
 /translation="MEACIVDDEESAMINQHGINIARLKGAAFIDQEPVSQYKSEQHE  
 SEQQEGKKVTSTREKEVSPINVTIKENPSRKTCSHDSIANLDNVDAYSLSGSSSFGSV  
 AETVK"  
 /besthit="qcoverage 100 , hcoverage 55.1546391752577 ,  
 similarity 98.1 , identity 93.5 , evaluate 4.67e-60 ,  
 alnlength 107 , Bacteria , Proteobacteria , ONI56764.1  
 hypothetical protein N500\_0157 [Wolbachia pipientis  
 wUni]"

gene 9495..10037  
 /locus\_tag="wEsol\_01814"

CDS 9495..10037  
 /locus\_tag="wEsol\_01814"  
 /codon\_start=1  
 /transl\_table=11  
 /product="hypothetical protein"  
 /pfam="Lipase\_GDSL"  
 /translation="MVATAYDDTKAEVLEQAVSEICNALKVLNEHVVKHVVANAPE  
 VGSIPAFNRDEEARELATKLTESFNAKLANGLDYMKKSTNLEIKAFDLNSKMKSMLSE  
 YKSKGFNCQDACTSNIADQIGRFKENIKILLKLIFKGERQHYNPGCSEETLKDYFFFD  
 YFHPTAELHHEVGNEVYELI"  
 /cog="COG3240 COG3240 370  
 Phospholipase/lecithinase/hemolysin"  
 /besthit="qcoverage 100.555555555556 , hcoverage  
 55.521472392638 , similarity 96.7 , identity 96.1 ,  
 evaluate 1.65e-114 , alnlength 181 , Eukaryota , Arthropoda  
 , GFY65264.1 hypothetical protein TNIN\_37661  
 [Trichonephila inaurata madagascariensis]"

gene complement(10386..>11032)  
 /locus\_tag="wEsol\_01815"

CDS complement(10386..>11032)  
 /locus\_tag="wEsol\_01815"  
 /codon\_start=1  
 /transl\_table=11  
 /fullproduct="qcoverage 102.803738317757 , hcoverage  
 94.8275862068966 , similarity 92.3 , identity 91.4 ,  
 evaluate 4.90e-92 , alnlength 220 , Eukaryota , Arthropoda  
 , GFY65265.1 uncharacterized protein TNIN\_37671  
 [Trichonephila inaurata madagascariensis]"  
 /translation="DHIEPKIKRKQKQQPQSLVLPKPPRASQVPPKMFTTGQEVQRQES

KVVVKDKPAVPPKPKNLSRADQKVSTEPKVVEVILKKS AESKPTVPLKSENQDNRKSA  
 QKAAGKAIPKVAAATMKGGANREMGSKVKALKEKFGNANVRLAESKTPAAQADIGVK  
 KKQSHSFLTENKRSATKHITAKFDPKSHVSKNPPSIQVSVKEMVAQIEKGKGGR"  
 /product="uncharacterized protein TNIN\_37671"  
 /besthit="qcoverage 102.803738317757 , hcoverage  
 94.8275862068966 , similarity 92.3 , identity 91.4 ,  
 evalule 4.90e-92 , alnlength 220 , Eukaryota , Arthropoda  
 , GFY65265.1 uncharacterized protein TNIN\_37671  
 [Trichonephila inaurata madagascariensis]"

# ORIGIN

```

1 gatgagataa ttacttttaca aatgaagcat tggattattaag aaaaattgta aagatttcctc
61 tgatgatcta gagaatttat atagtcaa atgggtctata gcattacaaa ttaagttaag
121 tgatgctgct gttgccagaa ttacacaaga actttataag ataaatagat ccatcacgct
181 cgaagaggct aatcttattg ctgaggctag aaaatacgat atcgatagag aaagtttcta
241 taaagtttat gatgacgtgc ttttaaagca cgaattgaaa aagataattc ttttaaagat
301 caatgaaaat cagtcctctt ttacagggtga attaaaaaac aaatttttaa ggtttataga
361 cgataactct gaacatatag ctagtatttt gaacgggtatt aagcagcata tacaggaaga
421 taacgtgcaa gaatttaagg agctaatacag gagaatacaa aaacacgaac gagaagtctc
481 tgaagcaaag caagagatga ctaaggctaa ctttaaggcta gtagtttcca ttgctaagaa
541 gtattcaaaa agaggccttg atttgcttga tttgatacaa gaaggcaata ttggtcctat
601 gaaggccgtg gcacttggtg ggtaagacaa tcaatcacta gggcaatacc tgagcagctc
661 aaagtagtta gaataccagt tcatatggta gaagttatca gtaaaatcaa cagagcatta
721 agaaaaatga ctcatgagat ggggaagagag ccgacgttag aggaattaag tgtagaactg
781 acaatgccac tggaaagaat acgcaaagtt atgaaaatag caagggacct agtaagtctt
841 gaagctccaa caggaaagga tgatagtagt accttcggtg attgtataga agataagcga
901 gtctccagac cagagcatgc tgcaataactt gctgacttgc gtggcattac aaccaatggt
961 cttgcaactt taacaccaa ggaaaataga attctaagaa tgtgttttgg ccttgtaaag
1021 atgggaagga gcatacctta gaagaagtag gaaaaatttt taatgtaaca cgtgagagag
1081 ttaggcaaat agaggcaaaa gcactgcgca agttgaaaca tccaagccgc gctagaaaac
1141 ttagagggtt cttttaagta tacgtgtcaa gttaagaaga agctgatttt gcccgaaaa
1201 agtgagagaa aagtcagagc gtttttaaaa taaaacgttt tttcaaaaag gtatgatatg
1261 aaggaaatgc acaataaagt ttaaaatggg gggttgcaaaa aagttgcacc gctatttttt
1321 tttatgaatc taatgaaaca acatgcta atctcggtaaa tattatgaca aataaaaatg
1381 acaattctaa ttcaaagtat agaaattttt atgttctggg tgatagttta tccgataatg
1441 gcgcaatcat tgggaatttta aataacttat gctttgcaaa aagcgtaaag tttgatgacc
1501 ctttttatca aggaggatct ttttagcaatg gccccactgc tgttgaaatg gtagcaaaat
1561 atttagatth agacgaatth aaacctgggt ggagttatct catttttggg aaatgccacg
1621 aacagcaagg tcaaaaactat gcagtttcat gtgcaacagc atctgaaatt ttaacccta
1681 tttttattct cagttgagca gagctcacag cgtatatata ctttggttgg ataacggttc
1741 gttgtacagg tataaaggaa tcgagataga ttttagacttc catatatcaa aatcatcagt
1801 atcgaaaaaa aatttgattg agccatgtcc gtccgtccgt ccttcctgta acacgataac
1861 ttgagaaaat tttgaggtat cttgacgaaa tgttgatgt aggttcctgg gcactcatct
1921 cagatcgctg tttaaaatga acgatatcgg actataatca cgcccacttt ttcgatatcg
1981 aaaatttcga aaaatcgaaa aagtgcgata attcattacc aaagacggat aaagcgatga
2041 aacttggtac gtgggttgaa cttatgacgt agaatagaaa ataagtaaaa ttttgaaaa
2101 gggcgtggca ccgcccactt ttaaaaggag gtaatttaga agttttgcaa gctgtaattt
2161 ggcagccgtt gaagataaaa aaaaataaat gtaaggcgcg ataacctccg aagagatcta
2221 aggccgagct tctcttccaa ttccgttgaa gatatcataa tgaaatttgg cagcaatggg
2281 acttgattta ctacatgtac acttaataaa aattagcaaa atcggagAAC gaccacacc
2341 actttaaaaa aaaatttttt ttaagtgaaa tttttacaaa aaatttaata tctttacagt
2401 atataagtaa attatgtcaa catttaactc cagtaatgat gtggtgcaac aaaatacaaa
2461 aacaaaagaa attttcaaaa tgggcgtggc tccgcccttt ttcatttgat ttgtctagga
2521 tacattta at gccataagtc gaacaaatat ttaccaatcc ttgtgaatct aggacgataa
2581 ctgttttctg tgaaaaaggg cgaaatcggg tgaagccacg ccagttttt atacacagta
2641 gatcgtctgt ccttcgcgtc ggccgttaac acgataactt gagcaaaaat cgatatatct
2701 ttactaaact cagttcacat aattatctga acacactttg tattcatata aaaaatggcc
2761 gaaatccgac tatgaccacg cccacttttt cgatttcgaa aaatacgaaa aatgaaaaaa
2821 atgccataat tctataccaa atacgaaaaa agagatgaaa catggtaatt gcattggttt
2881 attgacgcaa aatataactt tagaaaaaaa ctttgtaaaa tgggtgacac ctaccatatt
2941 aagtagaaga aaattaaaaa gttctgcagg gagaaatcga aagcccttag aatcatggca

```

|      |             |             |             |             |             |             |
|------|-------------|-------------|-------------|-------------|-------------|-------------|
| 3001 | ggaataactgt | tcggtggtatt | gcataatataa | ataaatttagc | ggtaccccgac | agattatgtt  |
| 3061 | ctgggtcacc  | ttgggtcccac | attttgggtcg | aaatctcgaa  | aacgccttca  | catatacaac  |
| 3121 | taccacaact  | ccctttttaa  | attcttatta  | atacctttta  | tttgacaccc  | atattgtaca  |
| 3181 | aacacattat  | agagtcaccc  | ctgggtcccc  | tttatggcga  | tatatcgaaa  | tatagaacta  |
| 3241 | aggtccactc  | ccttttataa  | tactcattat  | cacctttcgt  | ttgatactca  | taatgtacaa  |
| 3301 | acgcatttcta | gagtcacccc  | tggtccacct  | ttataacgat  | atcccgaaaa  | ggcgtccacc  |
| 3361 | tatagaacta  | aggcccaatc  | ccttttataa  | tactcattaa  | cacctttcat  | ttgataccca  |
| 3421 | tatctcgaaa  | atgcgtccac  | ctatagaact  | aaggcccaact | ccctttttaa  | attctcatta  |
| 3481 | gcacttttctg | tttgataccc  | atatacgtaca | aacaaattct  | agagtcaccc  | ctgggtccacc |
| 3541 | tttatggcga  | tatctcgaaa  | aggcgtccac  | ctatagaact  | aaggcccaact | ccctttttaa  |
| 3601 | atattcatta  | acacatttca  | tttgataccc  | atatacgtaca | aacaaattct  | agagtcaccc  |
| 3661 | ctgggtccacc | tttataccga  | tatttgcgaa  | agcgtccac   | ccatagaact  | aaggcccaact |
| 3721 | ccattttttaa | atactcatta  | acaccattca  | tttgataccc  | atatacgtata | aacgcattct  |
| 3781 | agagtcaccc  | ctgggtccacc | tttatggcga  | tatctcgaaa  | aggcgtccac  | ccatagaact  |
| 3841 | aaggccactc  | ccttttataa  | tactcattaa  | cacctttcat  | ttgataccca  | tatcgtacaa  |
| 3901 | acaaatttcta | gaatcacccc  | tggtccacct  | ttatggcaat  | atctcgaaaa  | ggcccaactcc |
| 3961 | cttttataaac | actcataaca  | actttcgttt  | gactcccata  | ttgtacaaac  | gcattctaga  |
| 4021 | gtgacccctg  | gtccaccttt  | ataacgatata | ccgaaaaagg  | tgtccaccta  | tagagctaag  |
| 4081 | gcccactccc  | ttttataaata | ctcattaata  | ccttttcattt | gatacccatg  | tcatacaaac  |
| 4141 | aaattctaga  | gtcacccctg  | gtccaccttt  | atggcggttat | ctcgaaaatg  | cgtccaccca  |
| 4201 | tagaactaag  | gcccactcca  | ttttataaata | ctcatcaaca  | ccatttcattt | gatacccata  |
| 4261 | tcgtataaac  | gcattctaga  | gtcatccctg  | gtccaccttt  | atggcgatat  | ctcgaaaagg  |
| 4321 | cgtccaccca  | tagaactaag  | gctcactccc  | ttttataaata | ctcattaaca  | ccttttcattt |
| 4381 | gatacccata  | tcgtacaaac  | aaattctaga  | atcacccctg  | gtccaccttt  | atggcaatat  |
| 4441 | ctcgaaaagc  | cgtccaccca  | tagaactaag  | cgttggcgta  | tttggcgtaa  | atcatgctta  |
| 4501 | atttttgcac  | tgtgtgcacc  | tcattgtcttt | ataaaacttc  | taggttttcta | cctatataag  |
| 4561 | ctgaaacgcg  | cttataaagc  | gttttaagaca | gtaaaagacg  | tcaaatagac  | aaggggagaat |
| 4621 | ttgaataacta | gctaccctgg  | ggtttttttg  | ccttttttcc  | gctcagtaaa  | tttcttaacg  |
| 4681 | tttataatatt | agggttaatcg | catttataaag | cggctgaatc  | gtagcgttta  | gaataaaaaa  |
| 4741 | cgccaatatt  | ttgaagtaca  | tataaataaaa | tagtcaccaa  | cggggcttct  | tttgcccttt  |
| 4801 | tttcgcttgg  | taaatttctt  | aatattttatg | gcttaggtta  | gttacaatt   | aagagtaata  |
| 4861 | ttcacggaaa  | tggtgtcatt  | ccagtgccttg | acactgggca  | cttttagacaa | tgttacaaaa  |
| 4921 | ataatatcat  | agaattcaat  | aggataattc  | ctgggtgtaca | gtcccagagt  | gtgatggtat  |
| 4981 | gataaaatat  | gagaaaacaa  | taccatcaaa  | gaaggaaatta | tgggatcata  | cacctagagg  |
| 5041 | ctgtattaca  | agaatttttg  | gggaacttag  | ttatgtgtaa  | tatattatcg  | cttcatatgt  |
| 5101 | gtgatgcaca  | agggcccttg  | aaccagatt   | aaattactga  | gtatcgttta  | aatttttcag  |
| 5161 | ttttgttttg  | tgtaatgagc  | agaaacacta  | tcaagtactt  | attgcaccaa  | aaaactttta  |
| 5221 | agcccttttt  | aagcatgctg  | gctaaagtta  | aaattcgacc  | agggcagcca  | caataaggta  |
| 5281 | gacaagccca  | aacgccatca  | tgttttttagg | agagtttgct  | aatggagggt  | cttaagttga  |
| 5341 | cgccattggc  | tgaacggata  | cctcttaact  | tgacgcgtat  | ggttttattta | acactcccaa  |
| 5401 | cgtttacaat  | taattcacca  | tttcttctga  | tttcaactatc | atttcaaact  | cctcctcagt  |
| 5461 | gagcagttga  | agttttgcctg | ctgcttcttt  | tagagtgtata | ttttctttat  | aagcaagctt  |
| 5521 | cgctattttt  | gctgcattgt  | cataccctat  | atgcgtattt  | aatatagtga  | ccaacattaa  |
| 5581 | cgactgattc  | agtaaatctt  | ttatcctctc  | ttcatttgcc  | ttaataccaa  | ctacacattt  |
| 5641 | ttctgtaaaa  | tttaaaacttg | cagcagctaa  | aagtcttata  | gactgcaaaa  | cattgtaaat  |
| 5701 | tatcactggc  | ttaaacacat  | tcaattcaaa  | atgaccggtt  | gaaccactaa  | tgatcacagc  |
| 5761 | aacatgattt  | cccataactt  | gagtgcacac  | catagttatt  | gcttcacact  | gagttggatt  |
| 5821 | cacttttacct | ggcataattg  | aagaaccagg  | ctcattttcc  | ggtaacatta  | tttccccaat  |
| 5881 | tccacatctt  | ggacgagaac  | caagcaacct  | tatatcattt  | gcaattttca  | ttaaactgac  |
| 5941 | tgctactgta  | ttgagtggtc  | cactgagctc  | aactaaagca  | tcgtttgctg  | ctagcgcttt  |
| 6001 | aaattttattg | cctgctgaag  | taaatggaag  | attaataatt  | tctgcaactt  | tgcttgaaaa  |
| 6061 | accttcagca  | aaaccctttt  | tagtattgag  | tctgtgcca   | accgcagtgc  | caccttggtc  |
| 6121 | aagctcgtat  | ataccactta  | aagtttaattt | tactctctct  | atcccccttt  | taatctgggc  |
| 6181 | tgcatagcca  | gaaaactcct  | gtccccagtg  | ttaggggctg  | tacatcttga  | aagtgagtac  |
| 6241 | gtcctacttt  | tattataattt | ttaaattcct  | gaaccttatt  | atccagcacc  | ttatgcaatt  |
| 6301 | tttcaagatt  | tggataaagc  | aagcagttta  | tttgctctgc  | tgctgctata  | tgcatgtctg  |
| 6361 | ttggaaagggt | gtcattttgat | gactgaccat  | aattcacatg  | gtcgttttga  | tgtatcggag  |
| 6421 | atttactacc  | caaattacca  | cctaaaatct  | ctattgcgcg  | attgctgatc  | acttcattca  |
| 6481 | tattcatatt  | agtctgcgtt  | cggatccgg   | tttgccaaac  | aacaagcgga  | aattcattat  |
| 6541 | taaatttgcc  | atctattact  | tcccttgccg  | ctgcgcagat  | tgcgctccct  | actttattat  |

|       |             |             |            |             |             |             |
|-------|-------------|-------------|------------|-------------|-------------|-------------|
| 6601  | ctatgctacc  | ctgcttcatg  | ttaacacgtg | ctgctgcaag  | ttttactatt  | gctaattgctt |
| 6661  | taatcagagg  | ctctggcatt  | ttttctgtgc | caatcttaaa  | attttctaaa  | gaacgttgag  |
| 6721  | tctgcgctcc  | ccagtaatgt  | tcacttggtg | cttttacttc  | ccctaagctg  | tctgattcta  |
| 6781  | ttctcgtttt  | tctatccata  | ttttccttct | tagcgtcatg  | caaactgggt  | cactacataa  |
| 6841  | ttttttcatg  | tctacttctt  | ggttaattaa | atcatactag  | atccaagtag  | tcaagtgtga  |
| 6901  | ccttaccag   | aaaaagtaga  | gagaaagtta | agacgttttt  | ggagtaaaat  | aaaacgtttt  |
| 6961  | ttcaaaatat  | ggcaaatagt  | ttattctctt | tgtaaaaaac  | attccaaact  | ttctctccac  |
| 7021  | tttttctggg  | taaggctcagt | tcagctatag | gcagcagttt  | tctgtattta  | ctttaaattg  |
| 7081  | aagaaagctc  | aaatgaaaga  | tcgtgttttg | ctaaaaatca  | cagaatgcag  | tctggttaca  |
| 7141  | attattttatc | actagtgcct  | aaagtgatct | cctttatcct  | ctcatctgct  | agtattttta  |
| 7201  | actcctcacc  | gtatctataa  | taatttcgct | ttataacgtg  | taactcatca  | gcagaagaag  |
| 7261  | aatctaattt  | agggtaatat  | tcgtaattgc | aattttcttc  | gatgtcctca  | atgcttatag  |
| 7321  | atgatgctaa  | aagtggaaat  | agaattaata | gtaaagttag  | taggattctt  | ttacaccacg  |
| 7381  | tcctgggtag  | cgcgtgacca  | gagaacaaaa | gatatggatc  | caagtagtca  | gggcactggg  |
| 7441  | atgacagaag  | atagtgcag   | aaatttcgta | aaaagctttt  | cataccaact  | atttaaactc  |
| 7501  | aattgtgtta  | taaatatatt  | aatagcgaaa | aaagaaaaac  | aagggtttaat | tttcttttta  |
| 7561  | tttgcgattt  | atctattaat  | taaccgtgaa | aggttacgtg  | taatgctcct  | tcacataatt  |
| 7621  | atcaataatt  | accttaaatt  | cttcagacat | tatcaccttg  | taaagttttg  | aaatatttgc  |
| 7681  | cgtctttgta  | gactgctgaa  | acaggttttt | ctccatatcc  | aggcaagctg  | attcccaa    |
| 7741  | ttgcgtgttt  | gctttctcca  | ggaccattta | ctatgcaccc  | cataacagca  | atgctcatat  |
| 7801  | gctctacacc  | tggatttttt  | tcttccacat | cggcatatga  | gtttttatat  | agccattcac  |
| 7861  | ctcttcagtt  | aatatacgaa  | aacgatcgct | actcgtgcgc  | ccacaaccag  | gacatgaatt  |
| 7921  | accctgaggg  | ttaaagtgtc  | gcaagcctat | agactgcaat  | atttcctgac  | acaccaccac  |
| 7981  | ttcattagta  | cgcgattcgc  | caggacgttg | agtcaaagaa  | gcccgatttg  | tatctccaat  |
| 8041  | gccattttgc  | aataaataag  | taagccctgc | tgcggtattt  | accacacctt  | tattgccc    |
| 8101  | accagcctca  | gttaaacc    | aatatagtgc | ataattggaa  | gattttgcaa  | gtgccatata  |
| 8161  | aactaaaatt  | aaatcttgta  | ctttgctaac | cttacaatgaa | atgattattt  | tgtttgaatt  |
| 8221  | tagatcaatt  | tcttcagctt  | tttttgcact | atcaagagca  | gacattacaa  | gtgctttg    |
| 8281  | cagtgcacg   | tcagaaggcc  | ttgaattact | aagcgaagag  | ttttcatcca  | tcaattttt   |
| 8341  | caaaaggtat  | ttatcaagac  | ttttttttta | tttattaaga  | ctaccccaat  | ttactccaat  |
| 8401  | tctaaccgga  | agattgtgca  | ttattgcata | ctctataacc  | ctttcaaact  | tctcgtcacg  |
| 8461  | tttgctcgcca | aagcctatat  | tacctgggtt | tatcctaatt  | ttaccagca   | ttttgatgtt  |
| 8521  | gtatggataa  | tctggaacta  | atttatctag | ctcatactga  | ccacagccta  | ccaatatttt  |
| 8581  | accgtcaaaa  | ccttctttat  | ttatctcttc | tactatataa  | ggtattgccc  | ttgctacttc  |
| 8641  | ctctgaattc  | aaggcaattc  | gcaccaattc | tgaacctgta  | cgcgctagtt  | ctgttatctc  |
| 8701  | ttttgcataa  | tgttttgcgc  | tactttttat | attatcagaa  | tctatatgca  | cgccaaagcgc |
| 8761  | catagattgt  | acaactatag  | gattattttc | acctatcttt  | acttttccaa  | cttcacaac   |
| 8821  | atgagttttg  | tgcctggaaa  | tcggcaataa | ttcatatgca  | tcattcattca | atatcaggtc  |
| 8881  | tttatctagc  | atattattaa  | tggccaatat | tgtgatacta  | ttttactggt  | tcagctacgc  |
| 8941  | tgccaaatga  | actcgaacca  | ttcaaactat | aagcatctac  | gttatccaaa  | ttagcaatag  |
| 9001  | aatcatgtga  | gcacgttttt  | cttgatggat | tttcttttat  | agtgcatttt  | ataggagaaa  |
| 9061  | cttctttttc  | tcgtgttgaa  | gtaactttct | tccttctctg  | ttgttcactt  | tcattgctgt  |
| 9121  | cgctttttata | ctgggaaaact | ggctcttgat | ctataaatgc  | agcacctttt  | aaacgtgcga  |
| 9181  | tattaatacc  | atgctgattt  | atcatagcgc | tctcttcatc  | gtcgactatg  | cacgcttcca  |
| 9241  | tgtcattttg  | ctcattatca  | agactagcaa | tttttttctc  | ttttaattgt  | ttgattagat  |
| 9301  | cttcttttatt | tatagctcga  | tcttgtgact | ttttttcttg  | agcaattccc  | tacaccgaa   |
| 9361  | cttagccttc  | cttacttggt  | tattattttc | tcaataaaatt | tcgttttagct | aaccagctag  |
| 9421  | atgcggtaat  | taaacatcat  | ccagatatag | gtaaagaaga  | tttattttgc  | atcataatcg  |
| 9481  | gcggaaatga  | tgttatggtt  | gccactgctt | atgacgatac  | caaagcggaa  | gaagtgttgg  |
| 9541  | aacaagcagt  | gagtgaataa  | tgtaatgcac | ttaaggttct  | aatgaacat   | gttgtaagc   |
| 9601  | atgtagttgt  | tgcaaacgca  | cctgaagttg | gctcaatacc  | agctttttaat | agagatgaag  |
| 9661  | aagcaaggga  | actagctacg  | aagctcacag | agagtttcaa  | tgcaaaattg  | gctaattggct |
| 9721  | tagattatat  | gaagaaaagt  | acaaatcttg | aaataaaaagc | atltgatctt  | aactctaaaa  |
| 9781  | tgaaaagtat  | gcttagcgaa  | tacaagagca | aaggtttcaa  | ttgtcaagat  | gcatgcacat  |
| 9841  | cgaacattgc  | agaccaaatt  | gggagattta | aagaaaaat   | aaaaatactc  | ttaaagttga  |
| 9901  | tatttaaaagg | ggaacgtcaa  | cactataacc | ctgggtgtag  | cgaagaaaca  | ctaaaggatt  |
| 9961  | atltcttttt  | tgattatttc  | catccaactg | cagaacttca  | tcattgaagtt | ggtaattgaag |
| 10021 | tgtatgagtt  | gatttgacac  | agttttttga | acattcccta  | gatcccagtg  | tccttatgat  |
| 10081 | gtcatcccag  | tgcttgacac  | tgggaaccag | aaaagtttgc  | ttgtgaacaa  | gcaaactagc  |
| 10141 | acagaaagtg  | attacaacat  | tttcgatgag | attatatgta  | aaactggatc  | ccagtgtctg  |

```

10201 ggcactggga tgacatcggt tactatgtgc catattgcaa tggttcgtaca gctgtgagtc
10261 acgcactttg cttcaatatt tgcacattag ccactcctct gaacagattc agtcagttta
10321 gctataactt cctaagtttg ctcacaatct cttgacttga ccatatgttt ttttcccaaa
10381 tgttactatc ttcttccttt tcctttctca atttgtgcaa ccatttcctt aacacttact
10441 tgtatggaag gaggattttt gctgacatga gattttggat caaattttgc tgttatgtgt
10501 ttcgttgtag atctcttatt ctctgttaga aatgaatgag attgtttttt cttcacaccg
10561 atatccgctt gtgctgctgg ggtagttttg ctttcagcaa gccgtacatt agcatttcca
10621 aatttttctt ttaatgcctt tactttactg cccatctcgc gattagctcc tcctttcata
10681 gtagctgctg ctacttttgg tatcgcttca ccagcagctt tttgtgctga tttcctattg
10741 tcttgatttt cagatttttag tggtagtcta gggttacttt cagctgattt ttttaagaatt
10801 acttctacta cttttggctc tgtgcttact ttttgatcag cacggcttag attttttaggc
10861 tttggcggtg ctgcagggtt atctttgact accactttcg attcttgtct aacttcttga
10921 ccagtagtaa acattttttt tggcacttgc gatgctcttg gtgggttttg tagtacgagg
10981 gattgaggtt gttgtttctg cttacgtttt atttttggct ctatatgac tt

```

//

```

LOCUS      JAQZAU010000157                6679 bp    dna        linear    ENV 17-MAR-2023
DEFINITION MAG: Wolbachia pipientis isolate wEsol contig_50450, whole genome
            shotgun sequence.
ACCESSION  JAQZAU010000157  JAQZAU010000000
VERSION    JAQZAU010000157.1
DBLINK     BioProject: PRJNA929258
            BioSample: SAMN33142973
KEYWORDS   WGS; ENV; Metagenome Assembled Genome; MAG.
SOURCE     Wolbachia pipientis (insect metagenome)
  ORGANISM Wolbachia pipientis
            Bacteria; Pseudomonadota; Alphaproteobacteria; Rickettsiales;
            Anaplasmataceae; Wolbachieae; Wolbachia.
REFERENCE  1  (bases 1 to 6679)
  AUTHORS  Fiutek,N., Couger,B.M., Roy,S., de la Torre,J.R. and Connor,E.F.
  TITLE    Genomic assessment of the contribution of the Wolbachia
            endosymbiont of Eurosta solidaginis to gall-induction
  JOURNAL  International Journal Molecular Sciences
REFERENCE  2  (bases 1 to 6679)
  AUTHORS  Fiutek,N., Couger,B.M., Roy,S., de la Torre,J.R. and Connor,E.F.
  TITLE    Direct Submission
  JOURNAL  Submitted (10-FEB-2023) Biology, San Francisco State University,
            1600 Holloway Ave, San Francisco, CA 94132, USA
COMMENT    ##Genome-Assembly-Data-START##
            Assembly Date      :: JUN-2019
            Assembly Method    :: FLYE v. 06-2019
            Genome Representation :: Full
            Expected Final Version :: Yes
            Genome Coverage    :: 100.0x
            Sequencing Technology :: Illumina HiSeq; PacBio Sequel
            ##Genome-Assembly-Data-END##
FEATURES   Location/Qualifiers
  source    1..6679
            /organism="Wolbachia pipientis"
            /mol_type="genomic DNA"
            /submitter_seqid="contig_50450"
            /isolate="wEsol"
            /isolation_source="galls on Solidago altissima"
            /host="Eurosta solidaginis MN-2018-EFC"
            /db_xref="taxon:955"
            /environmental_sample
            /country="USA: Cowling Arboretum, Carleton College,
            Northfield, MN"
            /lat_lon="44.48 N 93.13 W"
            /altitude="280 m"
            /collection_date="2018-11"

```

```

/metagenome_source="insect metagenome"
/note="metagenomic"
gene <1..405
/locus_tag="wEsol_01816"
CDS <1..405
/locus_tag="wEsol_01816"
/codon_start=1
/transl_table=11
/fullproduct="qcoverage 93.2835820895522 , hcoverage
91.2408759124088 , similarity 100 , identity 99.2 ,
evaluate 6.36e-76 , alnlength 125 , Bacteria ,
Proteobacteria , AAS14620.1 hypothetical protein WD_0955
[Wolbachia endosymbiont of Drosophila melanogaster]"
/translation="MFVVCVNPSTRAKQSVLSNKRKPTINFDDKKYGVKTSKIDQQSLN
KRQESSKLRDLLRSIPIIRFLARIFTPEKIEIISNPIYDNMEAYKKSQEDYPSKIKD
ETSIDDEHTKEVDSKLEKGNVEQVDNKKSRSS"
/product="hypothetical protein"
/besthit="qcoverage 93.2835820895522 , hcoverage
91.2408759124088 , similarity 100 , identity 99.2 ,
evaluate 6.36e-76 , alnlength 125 , Bacteria ,
Proteobacteria , AAS14620.1 hypothetical protein WD_0955
[Wolbachia endosymbiont of Drosophila melanogaster]"
gene 726..995
/locus_tag="wEsol_01817"
CDS 726..995
/locus_tag="wEsol_01817"
/codon_start=1
/transl_table=11
/fullproduct="qcoverage 100 , hcoverage 100 , similarity
100 , identity 100 , evaluate 2.67e-62 , alnlength 89 ,
Bacteria , Proteobacteria , WP_007552972.1 MULTISPECIES:
IS110 family transposase [Wolbachia]"
/cog="COG3547 COG3547 303 Transposase and inactivated
derivatives"
/pfam="DEDD_Tnp_IS110"
/product="IS110 family
transposase"
/translation="MQVNAILGVDISKKKFDVCLLVDSKKRHKVFQNNQDGFACLVVW
CNGHGANLTHLCLEATSWYGEDLATFMHDLGHNVSIVNPESFWQK"
/besthit="qcoverage 100 , hcoverage 100 , similarity 100
, identity 100 , evaluate 2.67e-62 , alnlength 89 ,
Bacteria , Proteobacteria , WP_007552972.1 MULTISPECIES:
IS110 family transposase [Wolbachia]"
gene 1115..1441
/locus_tag="wEsol_01818"
CDS 1115..1441
/locus_tag="wEsol_01818"
/codon_start=1
/transl_table=11
/pfam="Transposase_20"
/fullproduct="qcoverage 100 , hcoverage 100 , similarity
100 , identity 100 , evaluate 2.83e-66 , alnlength 108 ,
Bacteria , Proteobacteria , WP_007549647.1 MULTISPECIES:
transposase [Wolbachia]"
/translation="MQSLKDDKVQQTNRLNKNMHSSCKEAIISKVILAIIEEQIIVLEK
EINEHINNYPHLKNMVENLKTIGIGYLTAVAVVAEMPSVDNFDNAKQFTAFARTLS
IGIVSK"
/product="transposase"
/besthit="qcoverage 100 , hcoverage 100 , similarity 100
, identity 100 , evaluate 2.83e-66 , alnlength 108 ,

```

```

Bacteria , Proteobacteria , WP_007549647.1 MULTISPECIES:
transposase [Wolbachia]"
gene 1380..1670
      /locus_tag="wEsol_01819"
CDS 1380..1670
      /locus_tag="wEsol_01819"
      /codon_start=1
      /transl_table=11
      /pfam="Transposase_20"
      /fullproduct="qcoverage 100 , hcoverage 100 , similarity
100 , identity 100 , evalue 2.78e-65 , alnlength 96 ,
Bacteria , Proteobacteria , WP_081600779.1 MULTISPECIES:
transposase [Wolbachia]"
      /translation="MLNNLQLLLPGHYQSGSSVSKRSCICKIGSERIRKALYMPAIVV
KNHNNHFQKFCQRLASKGKCPKVIVLALMRKLMHVFFGILKKNQPFNCNFVG"
      /product="transposase"
      /besthit="qcoverage 100 , hcoverage 100 , similarity 100
, identity 100 , evalue 2.78e-65 , alnlength 96 ,
Bacteria , Proteobacteria , WP_081600779.1 MULTISPECIES:
transposase [Wolbachia]"
gene complement(1884..3158)
      /locus_tag="wEsol_01820"
CDS complement(1884..3158)
      /locus_tag="wEsol_01820"
      /codon_start=1
      /transl_table=11
      /fullproduct="qcoverage 100 , hcoverage 100 , similarity
99.8 , identity 99.8 , evalue 1.02e-293 , alnlength 424 ,
Bacteria , Proteobacteria , WP_141456681.1 MULTISPECIES:
amino acid permease [unclassified Wolbachia]"
      /cog="PotE COG0531 466 Amino acid transporters"
      /pfam="AA_permease_2 Spore_permease Trp_Tyr_perm
AA_permease"
      /tigr="TIGR00905 2A0302 473 transporter, basic amino
acid/polyamine antiporter (APA) family"
      /product="amino acid
permease"
      /translation="MSNKIGFWAIFALVISSQIGSGIFMLPISLAPYGMYSLISWIIS
GLGAISLALVFASLCAKFPETGGPHVYVKHAFGPAAAFFVGWTYWVISWVSTTAVIVV
GVGYLTPFFHEDIQNVHLFLEMLLLTIITLINFRGVATAGRVEFLLTVIKISVLLVIP
IAALFFFDRNNFIIEEISNLTTSQLARSTLITLWGFIGVELATAPAGSVDNPARTI
PRAVVLGTISVAVAYFINNLAIMG LINGNDLASSRAPYVDAIKIMASGNWHLIISITA
FIFCVGTLNAWVLASGQVALGLAKDKLMPQFFAQRNKHGSPFWGITISSVGTSVLLIL
TSSNNFAKQITSIIDFSVVSFLFVYLACSLAFLKVIVQEKSCYKFLIGSIATTFCCWV
IFETSVNTLLIASLFTASGVPLYLFWYRRVSV"
      /besthit="qcoverage 100 , hcoverage 100 , similarity 99.8
, identity 99.8 , evalue 1.02e-293 , alnlength 424 ,
Bacteria , Proteobacteria , WP_141456681.1 MULTISPECIES:
amino acid permease [unclassified Wolbachia]"
gene 3294..4739
      /locus_tag="wEsol_01821"
CDS 3294..4739
      /locus_tag="wEsol_01821"
      /codon_start=1
      /transl_table=11
      /fullproduct="qcoverage 100 , hcoverage 100 , similarity
100 , identity 100 , evalue 0.0 , alnlength 481 ,
Bacteria , Proteobacteria , WP_197907256.1 hypothetical
protein [Wolbachia endosymbiont of Kratibia gibbosae]"
      /translation="MNPRLKAFLVVCSIIAFLIALLLFLVYYLNLVNYILDPIVLRPF

```

ERLYKNLIVDGLYAYLSTSTSSPALAFLATGFIVIAAFICLNKMLLPLQEKIINNYTS  
FKNNNIDSNSMLFEVYKDPTIKLKDKILFFSIHLIYYLQLPFLYIASKVSALRGFLIF  
NFGLLLLNYALLIPVALLELIKYPVRLFSPLGLNVKQLSFLFNVDVGTGSQSVHTS  
SFEHSILQCAQELKQKFGAQPNVLNKEFEDYINNSDELTTQEKEQLKLYLNFGNSNEA  
AWQESKTGLTLTQAANLVSTAANKQKSDVNSLLLMLNKDGLGLCTLGMFDRIIYSLSC  
LEAKNNFLVQINGAVNVLTpkfTERFLKEYCNYKKLKILVDKFEDFYSEDYADKNNIS  
DEVKSNINQSIIEIREFVFKELYIKFYEEYGKSIQRGAIKQKLRELVTDDSIKEAVYY  
SMYNIEIPAEPPTYLERVKAFFGGHARSSAA"  
/product="hypothetical protein"  
/besthit="qcoverage 100 , hcoverage 100 , similarity 100  
, identity 100 , evalue 0.0 , alnlength 481 , Bacteria ,  
Proteobacteria , WP\_197907256.1 hypothetical protein  
[Wolbachia endosymbiont of Kradibia gibbosae]"

# ORIGIN

```

1 atgtttgtat gtgtgaaccc ctccagggca aaggcccaaa gtgttctttc aaataaaaga
61 aagcctacaa taaattttga tgataaaaag tatggtgtaa aaacctctaa aatagaccaa
121 cagtctctaa acaaaagaca agaatcttca aagctaagag atctcttaag gtcaatacca
181 ataataagga gatttttagc aaggattttc acacctgaaa aaatagaaat catcagtaac
241 cctatatatg acaacatgga agcatataaa aaatcgcagg aagattaccc tagtaagata
301 aaagatgaaa ctagtataga tgatgaacac acaaaagaag tagatagtaa acttgagaag
361 ggtaatgttg aacaagtgga caacaagaaa agtcgtagtt cataaatatc aatcatttaa
421 aaattatctc tagttataac attgtatctg ttcagatgca tggctcatgt acaaattattg
481 aaacaaaaat tccagtgtct ctttctcgtc atcccagtgc gtgacacttg tatctttatg
541 atgtgaggca ttagagctaa aatacctcac agggagggtg aagctgatgc gacactaatg
601 ccattaagcc agattttgct tccctcccat agagttaaag actgaacagt atcttttgga
661 attatatccc gtattacaag gttagtctaa actctcagtt tatttatagt cttggaggca
721 attttatgca agtaaagtct attttgggtg tggataattc aaaaaagaaa tttgatgttt
781 gtttgttagt ggacagtaaa aaacgacaca aagtctttca aaataatcaa gatggttttg
841 caaaacttgt agtttggtgc aatggccatg gagcaaatct tactcattta tgtcttgaag
901 caactagttg gtatggagaa gatttggcta cttttatgca cgatttagga cataatgtca
961 gtatagtaaa ccagaaaagc ttttggcaaa agtgagctgc tcagaaataa gacagataaa
1021 tcagatgcag ctatgatagc tagattttgt atcgccaaca aacctgctct ttggaagccc
1081 attgcacctg aaatgaggca tttgagggcg ttgcatgcaa tcgctaaaag atgataaggt
1141 gcaacagaca aatcgcttgg aaaacaaaaa tatgcattcc agttgcaaag aagctatatc
1201 taaagtaatt ttggcaatag aggagcaaat tattgttctc gaaaaagaaa ttaatgagca
1261 tataaataac tatccacatc taaaaaatat ggtggaaaac cttagacta taaaagggat
1321 aggatatctt actgctgttg ctgttgctgc agaaatgcca tcagttgata actttgacaa
1381 tgctaaacaa tttacagctt ttgctgccag gacattatca atcgggatcg tcagtaagta
1441 agagaagttg catatgcaaa ataggatctg agcgtattcg aaaagctctt tatatgccag
1501 ctatagtagt caaaaaccat aataatcatt ttcaaaaagt ttgtcagcgt ctagcaagta
1561 aaggcaaagt tccaaaagtc atagtctttg cgttaatgcg aaaattaatg catgtctttt
1621 ttggtattct taaaaagaat caaccattta attgtaattt tgttgataa tttgtttgac
1681 agcagagaca gtatctggga tccagattgg gcaactaagt ggtaaacacg aaagcgatta
1741 atcctttaca acgtttttga tggaaactgc cgaaagaact ggatgccagt gtcacgcact
1801 ggcatgacac ccattttctc ctatagttgt cttttctcgt ctaccttatt ttgccactct
1861 gctgaacaga tacataacat ttgctataca gaaactctgc gataccaaaa taaataaaga
1921 ggtacgccac ttgcagtgaa taagcttgcg atcagcaagg tattcacaga agtttcaaat
1981 attaccacgc agcaaaaagg tgttgctata ctgccaat aaaaatttgta acaactcttt
2041 tcttgacaaa taactttgag aaaagcaaga ctgcatgcaa ggtaaacaaa taaaaatgaa
2101 actacagaaa agtcgataat tgatgtgatc tgcttagcaa aattgttgct tgaagtgagg
2161 attagtagaa ctgaagtgcc aacggagctg attgttatgc ccagaaaagg agaaccgtgc
2221 ttgtttcttt gagcaaaaaa ctgtggcatc agtttatctt ttgcaaggcc aagggccact
2281 tgtccactag ctagtaccca agcgttttaa gtaccaacac aaaaaatgaa cgcagttata
2341 gaaataatca agtgccaatt gccagaggcc ataattttta ttgcgtcaac atatggtgct
2401 cttgaacttg ctaaattcatt gccatttatt aatcccataa ttgcaagatt gttgataaaa
2461 tacgcaacag caacagagat tgttccaagt accacagctc ttggtattgt tctagctgga
2521 ttatcaactg accctgcagg tgctgttgcc aattcaactc caataaaacc ccatagagta
2581 ataagtgtag aacgtgcaag aatctgcgat gttgtaagat ttgatatttc ttcacttatg
2641 atgaagttaa ttctatcaaa aaaaaacaat gctgctatag gtattacaag caatacagaa
2701 atttttatca ccgtcaataa aaactcaaca cgtccagcag tagctactcc tctaaaattt

```

|      |             |             |             |             |             |            |
|------|-------------|-------------|-------------|-------------|-------------|------------|
| 2761 | attagtgtaa  | taattgtaag  | taataacatc  | tctaaaaaca  | gatgtacggt  | ttgaatatct |
| 2821 | tcatggaaaa  | atggtgtaag  | ataaccaaca  | cccacaacta  | ttacggctgt  | tgtgctaacc |
| 2881 | catgagatca  | ccaataacgt  | ccaaccaaca  | aaaaaagctg  | cagcagggcc  | aaaagcatgc |
| 2941 | tttacaatga  | cgtgagggcc  | acccgtttcc  | ggaaattttg  | cgcagagtga  | ggcaaaaact |
| 3001 | aaagcaagag  | atatagcacc  | aagccctgat  | attatccagc  | ttataaggct  | atacatgcc  |
| 3061 | tatggagcaa  | ggctaattgg  | aagcataaaa  | attccagagc  | caatttggct  | gctaatacct |
| 3121 | aaggcaaaaa  | tagcccaaaa  | acctaatttt  | tttgacacaa  | taattcttat  | ctaaatagat |
| 3181 | taacaatata  | ccctaaactc  | agaaatttca  | attgatcttt  | taacataaaa  | acttgcattt |
| 3241 | ttttcaattt  | attcctaaaa  | tagattatat  | taacagatta  | ttaagagggg  | gttatgaatc |
| 3301 | cgagattaaa  | agcatttttg  | gttggttgta  | gtattattgc  | atttttgatt  | gcacttttgt |
| 3361 | ttctcgtgta  | ttattttaa   | cttcttggtt  | actataatct  | tgacccgatt  | ctagttcgct |
| 3421 | cctttgaaag  | attatacaaa  | aacttaattg  | ttgatggtct  | ttatgcctat  | ttatctacaa |
| 3481 | gcacttctag  | ccctgcacta  | gcatttttgg  | ctacaggttt  | tattgttatt  | gctgcgttta |
| 3541 | tttgcctgaa  | taaaatgctt  | cttcccttgc  | aagagaagat  | cataaacaac  | tatactcct  |
| 3601 | ttaaaaacaa  | caatattgat  | agcaatagca  | tggtgtttga  | ggttttataa  | gatccaacaa |
| 3661 | taaaattaaa  | ggacaaaatc  | ttattcttca  | gtatacactt  | gatataattac | ctacagcttc |
| 3721 | cattttttgta | tattgcatca  | aaggtatcag  | ctctacgtgg  | gtttcttata  | tttaattttg |
| 3781 | gtttattatt  | gttaaattat  | gcactgctaa  | ttccagtggc  | acttcttgaa  | ttgataaagt |
| 3841 | atccattagt  | gaggcttttc  | tcacctttgg  | gtttgaatgt  | aaagcagcta  | agctttttgt |
| 3901 | ttaatgtaag  | tgatgtgggc  | actggcagtc  | agagcgttca  | cacgagtagt  | tttgaacata |
| 3961 | gtattctcca  | atgcgctcaa  | gagttaaaac  | agaaatttgg  | agctcaacca  | aatgtactca |
| 4021 | ataaagagtt  | tgaagactac  | ataaataatt  | cagatgagct  | tacaactgag  | caaaaagagc |
| 4081 | aattaaaact  | ttatcttaac  | tttaatgggt  | ccaatgaagc  | agcttggcaa  | gaatcaaaaa |
| 4141 | ctggactaac  | tctcacacaa  | gctgcaaaact | tagtttcaac  | tgctgctaag  | aatcaaaaat |
| 4201 | cagatgtgaa  | ttcactatta  | ctaataaatt  | taaaggatgg  | acttgggtta  | tgtactctgg |
| 4261 | gaatgttcga  | tcgtattatt  | tattcgctta  | gttgtcttga  | agcgaaaaat  | aatttcttgg |
| 4321 | ttcaaataaa  | tggagcagtg  | aacgtattaa  | cacctaaatt  | tactgaaaga  | tttttaaaag |
| 4381 | aatattgcaa  | ttataaaaaa  | ttaaaaattt  | tggtagacaa  | gtttgaagat  | ttttactccg |
| 4441 | aagattatgc  | ggataaaaaa  | aatataagcg  | atgaggtgaa  | gagcaacatt  | aaccaatcaa |
| 4501 | taatagaaat  | aagagaattt  | gtcttttaaag | agctttacat  | aaaattttac  | gaagagtatg |
| 4561 | gaaaaagtat  | tcaaagaggt  | gccataaagc  | aaaaattaag  | ggaattagtt  | acagatgata |
| 4621 | gtataaagga  | agcagtgat   | tattcaatgt  | ataatataga  | aatccctgca  | gaaccaccta |
| 4681 | cttatcttga  | aagagtaaaa  | gcattttttg  | gaggtcatgc  | aaggtcttct  | gctgcttagt |
| 4741 | ggtttagttc  | gtgctatata  | gctaaactaa  | cttagattta  | ctgacaattt  | taaaacaaca |
| 4801 | aattcgctcat | tccgctagct  | cagtgtgtca  | tgcgcccccg  | cggcggtatt  | ttctatatta |
| 4861 | ttattttatt  | aatgacgttg  | ttggtttagt  | atatagcttt  | gtcgcttccc  | tttctgaaag |
| 4921 | gtttttgcaa  | ccagctggtg  | ccttgtcttc  | tacacacgct  | ctacagaaaa  | ctaagttttt |
| 4981 | tcttcaggaa  | agagttattg  | tattcacttg  | tatgttgaac  | taatggaacc  | tgaccaatta |
| 5041 | aacataaaact | tccatttttt  | taaaaaaaaa  | atattacgca  | cgcgagcggg  | ggtcttttag |
| 5101 | ttatgctggg  | tttggttgcg  | cgtgaacttc  | gctaaactgat | ttgattttta  | aaccgagttt |
| 5161 | agtttgcggt  | gcacaaaattg | agtaaaaaaa  | aaaaaatagc  | tttaaataaa  | aaaatagaaa |
| 5221 | aaaaaaggat  | attttttattg | tgaaggttgg  | gtgaatgtga  | aagttgtgcc  | gtctttttta |
| 5281 | tttttgtagt  | tgctgtgtta  | tatgtagatc  | tgttgctttt  | tttgtgtcta  | atgattatat |
| 5341 | aattctgcat  | ttcaaagtaa  | attggcttgc  | aggaggattt  | actagaacca  | aaatggcttt |
| 5401 | tttttttttt  | tttcatggct  | aggcaagatt  | ctcaaattta  | agttaagaca  | aagtaggcac |
| 5461 | acacagcgta  | ttcgattgga  | agttttttaa  | ttgcgtatga  | ggcaaagcag  | tatggatgaa |
| 5521 | cacaaacgtg  | gaacaggtga  | gagaacaaat  | ctcttggttt  | ttctttgcgg  | tgtcattagc |
| 5581 | tccactctcc  | taatccgaat  | cgtggccttt  | gttctggttt  | gattgtaagg  | gttacaataa |
| 5641 | atagttatgt  | attccgctag  | gggttttgaa  | agttaaaagt  | tataatcggc  | tacaggtttg |
| 5701 | aaaggttatc  | tggcgaggat  | gtgaggggtg  | aatggtatga  | tgagaattct  | ctttaatttc |
| 5761 | cgcggagaa   | agttttttagg | agtgagtttt  | tctttttctt  | tttctttttt  | cacagtatcc |
| 5821 | cgcagaacca  | aacgactttg  | caggactacg  | tttggaaaca  | tctgtgtagc  | ccatgttgag |
| 5881 | ttgttagtgt  | aaagtatttt  | taataaaagt  | atcaatgatc  | tgagcagaaa  | tgtgttttac |
| 5941 | ctattatagg  | gcgacaactg  | gcaaggcgaa  | tgtgacttaa  | cctacatgca  | gaaatgtata |
| 6001 | attaaaccgg  | agtacattag  | catatatctt  | tgaataagct  | tcttctctta  | tctgtagggg |
| 6061 | gtatgttttag | ataaataaga  | aaaaaagtac  | taatccttat  | gattttcaaaa | atatttttag |
| 6121 | ccacttgctc  | aagaaacgcg  | gcaattttact | ttttttaagc  | tcagagctag  | ccgtacataa |
| 6181 | aatatgtcca  | aagaagtgat  | ggagtttaac  | tcctaattgtc | aggtttagact | ctgaattaat |
| 6241 | ttgccgttcg  | ctgcaagcgg  | ggttcttata  | tattcgttga  | agcagaagct  | cacagagtga |
| 6301 | tattaacttg  | tgattggaaa  | cggtttggtt  | gtacaggtag  | ttaaaggaag  | tcgagataga |

```

6361 tataggactt ttatatatca aaagagcatc agtatcgaaa aaaaattttg attggagcct
6421 atgtacagtc ctgtccgtcc gtctccgtcg tccgtcatgt ccgtgaacac gatgaacttg
6481 aataaatttt gcatggtctg ataatctcag atcgctattt aaaatgaacg atatgtcggg
6541 ctgataacca ccgaccactc tttcgatacg gagaaatttt gtcggaaaaa acgaaaaaat
6601 tgcagattaa ttattgctca aggcgggttt cattgttggt aaagttttta agcgatgaaa
6661 cttggtagat aggtggacg

```

//

```

LOCUS      JAQZAU010000158          2203 bp    dna        linear    ENV 17-MAR-2023
DEFINITION MAG: Wolbachia pipientis isolate wEsol contig_55434, whole genome
            shotgun sequence.
ACCESSION  JAQZAU010000158  JAQZAU010000000
VERSION    JAQZAU010000158.1
DBLINK     BioProject: PRJNA929258
            BioSample: SAMN33142973
KEYWORDS   WGS; ENV; Metagenome Assembled Genome; MAG.
SOURCE     Wolbachia pipientis (insect metagenome)
ORGANISM   Wolbachia pipientis
            Bacteria; Pseudomonadota; Alphaproteobacteria; Rickettsiales;
            Anaplasmataceae; Wolbachieae; Wolbachia.
REFERENCE  1  (bases 1 to 2203)
AUTHORS    Fiutek,N., Couger,B.M., Roy,S., de la Torre,J.R. and Connor,E.F.
TITLE      Genomic assessment of the contribution of the Wolbachia
            endosymbiont of Eurosta solidaginis to gall-induction
JOURNAL    International Journal Molecular Sciences
REFERENCE  2  (bases 1 to 2203)
AUTHORS    Fiutek,N., Couger,B.M., Roy,S., de la Torre,J.R. and Connor,E.F.
TITLE      Direct Submission
JOURNAL    Submitted (10-FEB-2023) Biology, San Francisco State University,
            1600 Holloway Ave, San Francisco, CA 94132, USA
COMMENT    ##Genome-Assembly-Data-START##
            Assembly Date          :: JUN-2019
            Assembly Method        :: FLYE v. 06-2019
            Genome Representation   :: Full
            Expected Final Version :: Yes
            Genome Coverage        :: 100.0x
            Sequencing Technology  :: Illumina HiSeq; PacBio Sequel
            ##Genome-Assembly-Data-END##
FEATURES   Location/Qualifiers
            source          1..2203
                               /organism="Wolbachia pipientis"
                               /mol_type="genomic DNA"
                               /submitter_seqid="contig_55434"
                               /isolate="wEsol"
                               /isolation_source="galls on Solidago altissima"
                               /host="Eurosta solidaginis MN-2018-EFC"
                               /db_xref="taxon:955"
                               /environmental_sample
                               /country="USA: Cowling Arboretum, Carleton College,
                               Northfield, MN"
                               /lat_lon="44.48 N 93.13 W"
                               /altitude="280 m"
                               /collection_date="2018-11"
                               /metagenome_source="insect metagenome"
                               /note="metagenomic"
            gene            complement(<1..90)
                               /locus_tag="wEsol_01822"
            CDS              complement(<1..90)
                               /locus_tag="wEsol_01822"
                               /codon_start=1
                               /transl_table=11

```

```

/product="hypothetical protein"
/translation="MTKIIGKEYTEFLEQLKDRIATSRKAALA"
/besthit="qcoverage 100 , hcoverage 22.3880597014925 ,
similarity 100 , identity 100 , evaluate 2.41e-10 ,
alnlength 30 , Bacteria , Proteobacteria , WP_227738580.1
DUF1016 N-terminal domain-containing protein [Wolbachia
endosymbiont of Drosophila simulans]"
gene 262..504
/locus_tag="wEsol_01823"
CDS 262..504
/locus_tag="wEsol_01823"
/codon_start=1
/transl_table=11
/product="hypothetical protein"
/translation="MRFFYSNYILFLSSCGFLFLFSLPSTKAQTNDTSVVSIPQRKKET
VGHTVVAQPRQIIEMQEEVIINEGKEFIPVPRKKV"
/besthit="qcoverage 98.75 , hcoverage 38.3495145631068 ,
similarity 96.2 , identity 96.2 , evaluate 4.05e-31 ,
alnlength 79 , Bacteria , Proteobacteria , WP_015588888.1
MULTISPECIES: hypothetical protein [unclassified
Wolbachia]"
gene 720..881
/locus_tag="wEsol_01824"
CDS 720..881
/locus_tag="wEsol_01824"
/codon_start=1
/transl_table=11
/product="hypothetical protein"
/translation="MADIADSSSYRDNPLFRSIADNAMRAVYKCSPLTGLPIQHWHI
REVTLDLDFIL"
/besthit="qcoverage 100 , hcoverage 25.7281553398058 ,
similarity 100 , identity 100 , evaluate 8.41e-30 ,
alnlength 53 , Bacteria , Proteobacteria , WP_015588888.1
MULTISPECIES: hypothetical protein [unclassified
Wolbachia]"
gene complement(1086..1424)
/locus_tag="wEsol_01825"
CDS complement(1086..1424)
/locus_tag="wEsol_01825"
/codon_start=1
/transl_table=11
/pfam="Pfam-B_5905 Pfam-B_10889 SmpA_OmlA Pfam-B_960
Pfam-B_17238 Pfam-B_2938"
/fullproduct="qcoverage 100 , hcoverage 100 , similarity
100 , identity 100 , evaluate 2.57e-73 , alnlength 112 ,
Bacteria , Proteobacteria , WP_006279908.1 MULTISPECIES:
outer membrane protein assembly factor BamE [Wolbachia]"
/translation="MRVLISFILLFTVSCHTIHNHGAPGISVELWSKIKVGDDKEKV
VHTLGSPTLVSKFDDNVWYYVSYKIKQANFLGKRKYSSKSLQISFDQDGKVEDTKETD
ILERSLAVSD"
/product="outer membrane
protein assembly factor BamE"
/besthit="qcoverage 100 , hcoverage 100 , similarity 100
, identity 100 , evaluate 2.57e-73 , alnlength 112 ,
Bacteria , Proteobacteria , WP_006279908.1 MULTISPECIES:
outer membrane protein assembly factor BamE [Wolbachia]"
gene 1556..>2203
/locus_tag="wEsol_01826"
CDS 1556..>2203
/locus_tag="wEsol_01826"

```

```

/codon_start=1
/transl_table=11
/product="hypothetical protein"
/pfam="Ribonuc_red_sm"
/tigr="TIGR04171 RNR_1b_NrdF 316
ribonucleoside-diphosphate reductase, class 1b, beta
subunit"
/translation="MSLLEADPIYKPFNYPWAYDAWLQQQRIHWIPEEVPLADDVKDW
KTKLSSVEKNLLTQIFRFFTQADIEVNNCYMRHYSNIFKPTEICMMLASFNMETIHI
AAYSYLDDTIGMPSEYQAFLLKYDAMRKKYEYMLEFEESKKHDKKHVAKTLAVFGAFT
EGLQLFASFALLNFQRFQGMKGMGQIIAWSARDETLHTNSIIMLFHLLKRIMKF"
/cog="NrdF COG0208 348 Ribonucleotide reductase, beta
subunit"
/besthit="qcoverage 95.3703703703704 , hcoverage
62.6139817629179 , similarity 100 , identity 100 , eval
3.09e-146 , alnlength 206 , Bacteria , Proteobacteria ,
WP_182366519.1 ribonucleotide-diphosphate reductase
subunit beta [Wolbachia pipientis]"

```

# ORIGIN

```

1  tgcaagcgct gccttataac ggcttggtgc aatacgatct ttcaactgct ctaaaaattc
61  tgtatattct tttcctataa tttttgtcat acggttcctt ttaatccatt atacaattct
121 ttgtctgtcg agaaggcaat ctttcgcttg cctgcaactt tgaagggatt ccttatttac
181 ttcaaacttg tccatcaact aaaatatatt gactttacat gcaatattag ctttaaacca
241 gtaaaacaag ctgcttaaca tatgcgtttt ttctattcta attacattct ttttttatct
301 tcatgtgggt ttctgctttt ttcgttacct tcaacaaaag cccaaacgaa tgatacgtca
361 gttgttttcta taccacaaag gaaaaaagaa acagttgggc acactggtgt agcacaaccg
421 aggcaatta tcgaaatgca agaagaagtc attattaacg agggtaaaga atttattcct
481 gttccaaaaa gaaaaaaagt gtagagaaga aactaagaag ggatgttaaa gaggcaaaga
541 atgaaatagg aaacgaaaaa agcgttgaga gcaaaaagga tgaattagtt gtaacagaaa
601 ttattaactc tataagagac aaacttacaa aatgctggag cattcctgaa agcatagctt
661 acaaagaaaa ttttagtata aaaatcaact tattattatc cagtcaagggt gagataatta
721 tggccgatat agcagacagt agttcctatc gagataatcc acttttcagg tcgatagcag
781 ataacgcaat gcgtgcagta tataaatgta gcccatatac cggcttgctt attcagcacc
841 accacatttg gcgtgaagta aactagact ttattctata gctaaagtaa ttgcagctgc
901 atgaatgttg tgaacgtcac atttcacacg aaaatgtaat tcaatgatgg aattgcgtac
961 aaaatagatt ccagatacaa gtgtcatgct acttgggtaa catccttcct agtggactaa
1021 aatcacaata ttcgtacagt tatggaatga accgcggtat gacgtaggaa gatctgagca
1081 aactttcaat cagaaacagc caaagatctc tctaagatgt cagtttcttt tgtatcttca
1141 actttaccgt cctgggtcgaa tgaaatttgc agagacttac tactatactt cctttttcct
1201 aaaaaatttg cttgtttaat tttatatgag acatagtacc aaacattgtc atcgaaacttt
1261 gatactaatt ttggtgatcc taaagtgtga accacttttt ctttatcgtc acctactttt
1321 atcttgctcc acaattcaac actaatgcca ggagctccgt gattgtgaat agtgtgagtg
1381 cagctcactg taaataataa aataaaagat attaatactc gcatttctgt tgataaatta
1441 ctgaagcta taatacacta ataaattatc tgccgtcaaa tttcaaaaaa gttaaattga
1501 ctgattctca atatcactta atataatatt tacttttagaa aataatagggt gtcttatgtc
1561 attgttagaa gcagatccaa tatacaaacc ttttaattac cttggggcgt atgatgcgtg
1621 gctgcagcaa caaagaatcc attggatacc tgaagaagtt ccgctcgctg atgacgtgaa
1681 ggattggaaa actaaacttt caagtgtaga aaaaaatcta ctaaccacga tcttttagatt
1741 ttttactcag gcagacattg aagtaaataa ctgctacatg aggcattatt caaatatatt
1801 taagccaaca gaaatatgca tgatgcttgc aagcttttcc aatatggaaa ccatacacat
1861 tgcagcttat tcttatcttt tagacacaat tggcatgcca gaaagtgagt atcaagcatt
1921 tttaaagtat gatgctatga gaaagaaata tgaatatatg ttggaattcg aggaaagcaa
1981 aaaacacgat aaaaaacatg tagctaaaac tctagcagtg tttggtgcat tcaactgaagg
2041 gttgcagtta ttgcatcat ttgcaatttt gctcaatttc caacgttttg gaaaaatgaa
2101 aggaatgggg cagataatcg cctggtcagc ccgtgatgaa actttgcaca ccaattcaat
2161 tatcatgtta ttatacatt tattaagag aataatgaaa ttt

```

//

```

LOCUS      JAQZAU010000159      41299 bp      dna      linear      ENV 17-MAR-2023
DEFINITION MAG: Wolbachia pipientis isolate wEsol contig_58088, whole genome
            shotgun sequence.

```

ACCESSION JAQZAU010000159 JAQZAU010000000  
 VERSION JAQZAU010000159.1  
 DBLINK BioProject: PRJNA929258  
 BioSample: SAMN33142973  
 KEYWORDS WGS; ENV; Metagenome Assembled Genome; MAG.  
 SOURCE Wolbachia pipientis (insect metagenome)  
 ORGANISM Wolbachia pipientis  
 Bacteria; Pseudomonadota; Alphaproteobacteria; Rickettsiales;  
 Anaplasmataceae; Wolbachieae; Wolbachia.  
 REFERENCE 1 (bases 1 to 41299)  
 AUTHORS Fiutek,N., Couger,B.M., Roy,S., de la Torre,J.R. and Connor,E.F.  
 TITLE Genomic assessment of the contribution of the Wolbachia  
 endosymbiont of Eurosta solidaginis to gall-induction  
 JOURNAL International Journal Molecular Sciences  
 REFERENCE 2 (bases 1 to 41299)  
 AUTHORS Fiutek,N., Couger,B.M., Roy,S., de la Torre,J.R. and Connor,E.F.  
 TITLE Direct Submission  
 JOURNAL Submitted (10-FEB-2023) Biology, San Francisco State University,  
 1600 Holloway Ave, San Francisco, CA 94132, USA  
 COMMENT ##Genome-Assembly-Data-START##  
 Assembly Date :: JUN-2019  
 Assembly Method :: FLYE v. 06-2019  
 Genome Representation :: Full  
 Expected Final Version :: Yes  
 Genome Coverage :: 100.0x  
 Sequencing Technology :: Illumina HiSeq; PacBio Sequel  
 ##Genome-Assembly-Data-END##  
 FEATURES Location/Qualifiers  
 source 1..41299  
 /organism="Wolbachia pipientis"  
 /mol\_type="genomic DNA"  
 /submitter\_seqid="contig\_58088"  
 /isolate="wEsol"  
 /isolation\_source="galls on Solidago altissima"  
 /host="Eurosta solidaginis MN-2018-EFC"  
 /db\_xref="taxon:955"  
 /environmental\_sample  
 /country="USA: Cowling Arboretum, Carleton College,  
 Northfield, MN"  
 /lat\_lon="44.48 N 93.13 W"  
 /altitude="280 m"  
 /collection\_date="2018-11"  
 /metagenome\_source="insect metagenome"  
 /note="metagenomic"  
 gene 212..1123  
 /locus\_tag="wEsol\_01827"  
 CDS 212..1123  
 /locus\_tag="wEsol\_01827"  
 /codon\_start=1  
 /transl\_table=11  
 /fullproduct="qcoverage 100 , hcoverage 101.33779264214 ,  
 similarity 98.7 , identity 98.3 , evaluate 7.72e-195 ,  
 alnlength 303 , Bacteria , Proteobacteria ,  
 WP\_015589316.1 Rpn family recombination-promoting  
 nuclease/putative transposase [Wolbachia endosymbiont of  
 Drosophila simulans]"  
 /pfam="PDDEXK\_2 Pfam-B\_9835 Pfam-B\_9730 Pfam-B\_12519  
 Pfam-B\_10245"  
 /tigr="TIGR01784 T\_den\_put\_tspse 273 conserved  
 hypothetical protein"

```

/product="Rpn family
recombination-promoting nuclease/putative transposase"
/translation="MALSKFLDPKLDLTFKRIFGTEKNKNILIHFLNDILGFTEINTI
QEVEFLSTIMDPEIASDKQSIVDVLCDSSGTRYVIEMQLTRDKGFQKRAQLYAAKAY
SRQLDKSGNYIDLKKVFFIAISNCNLLPEEVDYISNHTIRDEKTNEHDLKDFQFIFIE
LPKFPKNKEEQLESIVDRWLFFFKYADETTEEDLRKIAEKAPIIKLAYDELDRFSWNE
KDLVAYEERIMDLRKEEAILKYRLDLATEKGKKIGKEEGKIEGKIEGKIEVAKAMLAN
NVDVNTIVKFTGLSISEIEELSVNGTE"
/besthit="qcoverage 100 , hcoverage 101.33779264214 ,
similarity 98.7 , identity 98.3 , evaluate 7.72e-195 ,
alnlength 303 , Bacteria , Proteobacteria ,
WP_015589316.1 Rpn family recombination-promoting
nuclease/putative transposase [Wolbachia endosymbiont of
Drosophila simulans]"
gene complement(1158..2405)
/locus_tag="wEsol_01828"
CDS complement(1158..2405)
/locus_tag="wEsol_01828"
/codon_start=1
/transl_table=11
/fullproduct="qcoverage 100 , hcoverage 100 , similarity
100 , identity 100 , evaluate 2.73e-298 , alnlength 415 ,
Bacteria , Proteobacteria , WP_015589317.1 MULTISPECIES:
IscS subfamily cysteine desulfurase [unclassified
Wolbachia]"
/cog="NifS COG1104 386 Cysteine sulfinase
desulfurase/cysteine desulfurase and related enzymes"
/pfam="Aminotran_5 Beta_elim_lyase DegT_DnrJ_EryC1
Aminotran_1_2 Pyridoxal_deC"
/tigr="TIGR02006 IscS 402 cysteine desulfurase IscS"
/product="IscS subfamily
cysteine desulfurase"
/translation="MNVESKKIHDAKIKLPIFLDYQSTTKVDPRVLEVMIPYFGEFSN
AHSRSHSFGWTAEEAVEKARKHIAIDLVNADSKEIIFTSGATESNNTAIGVAHFYKKN
GNHIITVCTEHKCVLDSCRHLENEGFKVTYLPVKQNGIIDLLKLEEAITDKTILVSVM
MVNNEIGVIQPVKEIGEICRKRNIFFHTDAAQSFGKVPIDVNEMCIDLMSLSHSHKIYG
PMGIGALYVRRKNPRVRLIPLISGGGQERGMRSGTVPTPLAVGFGEEAARIAKEEMKKE
TTRVEELRDILYNKIKEAFPDIVLNGDYENRIPGNLNLSPYVEGESLIMAIKDLAVS
SGSACTSASLEPSYVVRSLNNGHDLEHSSIRFGLGRFTTKEEVLYAADLVAKNVGRLR
EMSPLWEMVQEGVDLNTVKWDSH"
/besthit="qcoverage 100 , hcoverage 100 , similarity 100
, identity 100 , evaluate 2.73e-298 , alnlength 415 ,
Bacteria , Proteobacteria , WP_015589317.1 MULTISPECIES:
IscS subfamily cysteine desulfurase [unclassified
Wolbachia]"
gene complement(2692..4110)
/locus_tag="wEsol_01829"
CDS complement(2692..4110)
/locus_tag="wEsol_01829"
/codon_start=1
/transl_table=11
/fullproduct="qcoverage 100 , hcoverage 100 , similarity
100 , identity 100 , evaluate 0.0 , alnlength 472 ,
Bacteria , Proteobacteria , WP_141456651.1 MULTISPECIES:
metalloprotease TldD [unclassified Wolbachia]"
/cog="TldD COG0312 454 Predicted Zn-dependent proteases
and their inactivated homologs"
/pfam="PmbA_TldD"
/product="metalloprotease
TldD"

```

```

/translation="MPNLDQIFFAQNNVNINNVYKIVNNALSNSDGGELFLEFCQSES
LVFEDNILKHMDLNTRRGFGLRSFCEDSTSFVCSSEISEKEISNAASMVKSSVSLNKT
NSINLNEETKSLYSRINPINEMDLNSKIKLLNEVNEYVRSKNNCVKQVKITLSGEWQV
VQIIKGDHRLSDIRPLVRFNVLVIVEKDGRTERGSAGHGGRDSYSKFISEKKWKEVAN
QALEQALVNLEAIPTPAGEMTVVLGPGWPGILLHEAVGHGLEGDFNRKKVSAFSNSVG
KQVAASDITVDDGTLPLNRGSISVDDEGTTPPSYNILIEDGILKGYMQDHMNAKLMGV
SPTGNRRRESYKEVIMPRMTNTYMLPGKYTPKEIISSVKKGLYAVNFGGGQVDITSGK
FVFSSEAYLIENGKITQPVKGATLIGDGQTVLKKVSMVGNDLKLDPGVGTCSKDGQN
VPVGVGQPTLKVDAITVGGTEI"
/besthit="qcoverage 100 , hcoverage 100 , similarity 100
, identity 100 , evalue 0.0 , alnlength 472 , Bacteria ,
Proteobacteria , WP_141456651.1 MULTISPECIES:
metalloprotease TldD [unclassified Wolbachia]"
gene 4328..4819
/locus_tag="wEsol_01830"
CDS 4328..4819
/locus_tag="wEsol_01830"
/codon_start=1
/transl_table=11
/pfam="Pfam-B_17189"
/fullproduct="qcoverage 100 , hcoverage 100 , similarity
100 , identity 100 , evalue 1.95e-106 , alnlength 163 ,
Bacteria , Proteobacteria , WP_015589319.1 MULTISPECIES:
hypothetical protein [unclassified Wolbachia]"
/translation="MYSEKNKLACRKKVRTYSKRLVTTLSTISFIGYIAALVLNIPVL
SLYFSIACTILSVLSSTLNIWLSLADHFRQRDNLNQLGVENTPGQEKLTIKCLDITSNV
LFLIGGITPILPFESPIIPFVSTAFFILGCAFMATNIVRTRISEPQAKKPTDDHSLTA
KAA"
/product="hypothetical protein"
/besthit="qcoverage 100 , hcoverage 100 , similarity 100
, identity 100 , evalue 1.95e-106 , alnlength 163 ,
Bacteria , Proteobacteria , WP_015589319.1 MULTISPECIES:
hypothetical protein [unclassified Wolbachia]"
gene 5064..5771
/locus_tag="wEsol_01831"
CDS 5064..5771
/locus_tag="wEsol_01831"
/codon_start=1
/transl_table=11
/fullproduct="qcoverage 100 , hcoverage 100 , similarity
100 , identity 100 , evalue 2.70e-162 , alnlength 235 ,
Bacteria , Proteobacteria , WP_141456650.1 MULTISPECIES:
uroporphyrinogen-III synthase [unclassified Wolbachia]"
/cog="HemD COG1587 248 Uroporphyrinogen-III synthase"
/pfam="HEM4"
/product="
uroporphyrinogen-III synthase"
/translation="MKSILLTRPLLDSFNTRNLRKYGYKVFIIEPVFTIKYLNPDISA
YEFDVVISTSKNSVKALSQICKEDDFPIITVGNSTMQAANKLGFSDIISADSNVDGLI
SFIKAHYSNAIKFLYIRGQEVSCDLKKRLSEEDFNIREVVLYKTIKRSLTNRCKNLL
LDGKIDSVAFFSSQTARVFCSLVLKSGLSHVMNITAYTMSKNIADSLKLIKWKKIIT
SRLPTGESLIDIINKDC"
/besthit="qcoverage 100 , hcoverage 100 , similarity 100
, identity 100 , evalue 2.70e-162 , alnlength 235 ,
Bacteria , Proteobacteria , WP_141456650.1 MULTISPECIES:
uroporphyrinogen-III synthase [unclassified Wolbachia]"
gene 5771..6550
/locus_tag="wEsol_01832"
CDS 5771..6550
/locus_tag="wEsol_01832"

```

```

/codon_start=1
/transl_table=11
/fullproduct="qcoverage 100 , hcoverage 100 , similarity
100 , identity 100 , evalue 6.45e-191 , alnlength 259 ,
Bacteria , Proteobacteria , WP_141456649.1 MULTISPECIES:
exodeoxyribonuclease III [unclassified Wolbachia]"
/cog="XthA COG0708 261 Exonuclease III"
/pfam="Pfam-B_5213 Exo_endo_phos Pfam-B_1244"
/tigr="TIGR00633 xth 255 exodeoxyribonuclease III (xth)"
/product="
exodeoxyribonuclease III"
/translation="MLKIATWNVNSIRKRVNQLCSFIVDSQVDIILLQEIKCTEEQFP
YAEIEKLGYEYAIYGQVARNGVCVLSKYPILEKFKIDIVESHQEARYIECVIKHTNHNK
VRVGSVYVPNGQSPDSQAFHEYKLKFFDNLIERMSTLLKNEELTIIAGDYNVAPDEIDV
FDSNLLNGQVCFHIREREKLRILNLGFKDAFRISHPNLQQFTWWHYQGNSLRNNQGM
RIDYMLLSPQAVDKLETCTYIDDLRLKLENPSDHTPVVCAIE"
/besthit="qcoverage 100 , hcoverage 100 , similarity 100
, identity 100 , evalue 6.45e-191 , alnlength 259 ,
Bacteria , Proteobacteria , WP_141456649.1 MULTISPECIES:
exodeoxyribonuclease III [unclassified Wolbachia]"
gene complement(6587..7609)
/locus_tag="wEsol_01833"
CDS complement(6587..7609)
/locus_tag="wEsol_01833"
/codon_start=1
/transl_table=11
/pfam="Pfam-B_6864 IncA"
/fullproduct="qcoverage 100 , hcoverage 100 , similarity
100 , identity 100 , evalue 1.11e-218 , alnlength 340 ,
Bacteria , Proteobacteria , WP_015589322.1 MULTISPECIES:
hypothetical protein [unclassified Wolbachia]"
/translation="MTKILTPQTKNLEPSNQVTNKDEKIFEKEEHQVIYDYFVKVLEG
KAELKENKEITDYFISAYKDILLNNVNPDKIKPLSEENFSQFLLSVFEKIREKKLANE
ENLNKGKIKEVVDDCVADIRGTEAKDSSIKFVLEMLLLIGGIKIDPKNISGSFMDGM
KEKIPFLGKDKKEEDEPPLSDEEMVTTFLSKIFFPVLLSTIPMLIFGPTTLGVVLTAI
GTIFAIKGGVEVLFSNNKKGTLYDPSSQDKDDTEKRAKLNGKILEGIDDILKTPVTEV
EKGTSVSEQISQGEKSEQQPVEQISQENNRGNEESKQQDQPPWTRKENKRREENTSN
KQAGIT"
/product="hypothetical protein"
/besthit="qcoverage 100 , hcoverage 100 , similarity 100
, identity 100 , evalue 1.11e-218 , alnlength 340 ,
Bacteria , Proteobacteria , WP_015589322.1 MULTISPECIES:
hypothetical protein [unclassified Wolbachia]"
gene complement(7660..10236)
/locus_tag="wEsol_01834"
CDS complement(7660..10236)
/locus_tag="wEsol_01834"
/codon_start=1
/transl_table=11
/fullproduct="qcoverage 100 , hcoverage 100 , similarity
100 , identity 100 , evalue 0.0 , alnlength 858 ,
Bacteria , Proteobacteria , WP_015589323.1 MULTISPECIES:
DNA polymerase I [unclassified Wolbachia]"
/pfam="5_3_exonuc_N 5_3_exonuc DNA_pol_A"
/tigr="TIGR00593 pola 890 DNA polymerase I"
/product="DNA polymerase I"
/translation="MKEKTFTIIDGYGFLFRAYYVLPPLITTTGMPIGGVYGFLNMVL
KYIAHSDYLTIALDAGKKNFRHDLYPEYKANRVTPPEDLTPQFTILREAVEAFNLSYE
EIEGYEADDIIATLAAKYANHQDFKVVVVSSDKDLFQLLNHNILIFDPIKNIYIDEKQ
VIEKFGVNSHKLLDLFSLTGDASDNIPGVPGIGPKTAAKLLDEFDSLNNIENIDNIE

```

```

QTRIRNLTTEHKEKALISRELLSLCEKVDLQHDIAKYEVHSPNMEKLLSFLKKYEFNS
LIGKMEKLFSSYNGSSTKEKIEYSSEELEKFLHCRYEGRIAIHCHFEDNLLNKISLSY
SESNIFYIEQDSIQDALITINSTLLSNGVLKIIHNIKEIRKIFPAIEKMLDSVDDLMI
MSYSLDTGKHDHSIPNIVAHNLSGDVEIFSAKTLIAIREKLKQRLFQEKLFITYERFD
KPLMKVIFDMEKNGILLNIQKLQELSDKFQQVIQVLEDEIYNLAGERFNIAKQKLS
VLFNKMGLNKKKKSKSGSYSTNYEVLEALEEEGVEIASKILNWRHLSKLKGTYTDL
IKQVDSIDGRIHTSFSTTATATGRLSSSNPNLQNIPIRSEEGNLIRQAFIAPKGHKII
SADYSQIELRLLAHVANVAAFKEAFANGQDIHEITARQVFGVQEIIDEQLRRKAKSINF
GIIYGISPFGLAKRLGITIAEAAEYINYYFSCYPEIKAYMEKAVSIARLHGIVETLFG
RRCFVRDINNTIPYIRQFAERAAINAPLQGTAAADIKRATIQLFDQLKVGKIIILQVHD
ELLVEVEDEKVQETAKLVKNIMEGVVEISIPLEVEIKVGDNWALNYDLNMADSKSIDY
LN"
/besthit="qcoverage 100 , hcoverage 100 , similarity 100
, identity 100 , evalue 0.0 , alnlength 858 , Bacteria ,
Proteobacteria , WP_015589323.1 MULTISPECIES: DNA
polymerase I [unclassified Wolbachia]"
gene complement(10451..10615)
/locus_tag="wEsol_01835"
CDS complement(10451..10615)
/locus_tag="wEsol_01835"
/codon_start=1
/transl_table=11
/fullproduct="qcoverage 100 , hcoverage 100 , similarity
100 , identity 100 , evalue 7.44e-31 , alnlength 54 ,
Bacteria , Proteobacteria , WP_081600771.1 MULTISPECIES:
IS3 family transposase [unclassified Wolbachia]"
/cog="Tra5 COG2801 232 Transposase and inactivated
derivatives"
/pfam="rve_3 rve_2"
/product="IS3 family
transposase"
/translation="MSHKGCCYNNSVVESFFSSLKREILIDTSQHSAQQTRTAIFEYI
EIFYNKQRHY"
/besthit="qcoverage 100 , hcoverage 100 , similarity 100
, identity 100 , evalue 7.44e-31 , alnlength 54 ,
Bacteria , Proteobacteria , WP_081600771.1 MULTISPECIES:
IS3 family transposase [unclassified Wolbachia]"
gene complement(10605..10769)
/locus_tag="wEsol_01836"
CDS complement(10605..10769)
/locus_tag="wEsol_01836"
/codon_start=1
/transl_table=11
/fullproduct="qcoverage 100 , hcoverage 100 , similarity
100 , identity 100 , evalue 4.17e-28 , alnlength 54 ,
Bacteria , Proteobacteria , WP_153801314.1 MULTISPECIES:
hypothetical protein [Wolbachia]"
/cog="Tra5 COG2801 232 Transposase and inactivated
derivatives"
/pfam="rve"
/product="hypothetical protein"
/translation="MSSSINKQLVMDSLLMDVNRKPAKNLLHSDQGSQYTSQGYQY
LLSIKNIDES"
/besthit="qcoverage 100 , hcoverage 100 , similarity 100
, identity 100 , evalue 4.17e-28 , alnlength 54 ,
Bacteria , Proteobacteria , WP_153801314.1 MULTISPECIES:
hypothetical protein [Wolbachia]"
gene complement(10769..10978)
/locus_tag="wEsol_01837"
CDS complement(10769..10978)

```

```

/locus_tag="wEsol_01837"
/codon_start=1
/transl_table=11
/fullproduct="qcoverage 100 , hcoverage 100 , similarity
97.1 , identity 91.3 , evaluate 5.68e-37 , alnlength 69 ,
Bacteria , Proteobacteria , CDR78719.1 hypothetical
protein WPAU_0327 [Wolbachia endosymbiont of Drosophila
simulans wAu]"
/translation="MQKNDIRAILRRKFKIKKQQTDNRAVAPNILDQNFIVDQPNKVV
DYLHQDQGGMAIFGNNNRSIFTHGS"
/product="hypothetical protein"
/besthit="qcoverage 100 , hcoverage 100 , similarity 97.1
, identity 91.3 , evaluate 5.68e-37 , alnlength 69 ,
Bacteria , Proteobacteria , CDR78719.1 hypothetical
protein WPAU_0327 [Wolbachia endosymbiont of Drosophila
simulans wAu]"
gene complement(11225..11509)
/locus_tag="wEsol_01838"
CDS complement(11225..11509)
/locus_tag="wEsol_01838"
/codon_start=1
/transl_table=11
/fullproduct="qcoverage 100 , hcoverage 100 , similarity
100 , identity 100 , evaluate 1.40e-55 , alnlength 94 ,
Bacteria , Proteobacteria , WP_038198869.1 MULTISPECIES:
transposase [Wolbachia]"
/cog="COG2963 COG2963 116 Transposase and inactivated
derivatives"
/pfam="HTH_Tnp_1 HTH_23 HTH_28 Pfam-B_9422"
/product="transposase"
/translation="MAREYTAEFKLEAVKLANEQRKVGQPVAKVARDLGIRDSVLGKW
MKKYNEKKSAANAFPDVAPYDKERFDLQKELAKVTRERDILKKALASQKE"
/besthit="qcoverage 100 , hcoverage 100 , similarity 100
, identity 100 , evaluate 1.40e-55 , alnlength 94 ,
Bacteria , Proteobacteria , WP_038198869.1 MULTISPECIES:
transposase [Wolbachia]"
gene complement(11742..12548)
/locus_tag="wEsol_01839"
CDS complement(11742..12548)
/locus_tag="wEsol_01839"
/codon_start=1
/transl_table=11
/pfam="NAD_binding_10 RmlD_sub_bind"
/fullproduct="qcoverage 100 , hcoverage 100 , similarity
100 , identity 100 , evaluate 5.73e-194 , alnlength 268 ,
Bacteria , Proteobacteria , WP_015589324.1 MULTISPECIES:
SDR family oxidoreductase [unclassified Wolbachia]"
/translation="MHLFCFGYGYVAKFLSKLLNLGWKVSQTSRSKNIQDVILFNVE
KVSQDLLKSATHVLISIPPDGDDVVERYGDCLQNVKWLGYLSATSVYGDHSGNWNVEE
SETKPIEIRGEKRLKSERKWLNSRLPVHIFRLAGIYGPSRNVLIDLQLGKARNVKKEG
HFFSRIHVEDISNILFSSMQNIKPGEIYNCADDLPTTQSEVVIYATKLLNVSPPEPIE
LPDYAQSFYLGSKRVS NVKIKKDLNVSLIYPNYKVGLESLHVNKTEITSE"
/product="SDR family
oxidoreductase"
/besthit="qcoverage 100 , hcoverage 100 , similarity 100
, identity 100 , evaluate 5.73e-194 , alnlength 268 ,
Bacteria , Proteobacteria , WP_015589324.1 MULTISPECIES:
SDR family oxidoreductase [unclassified Wolbachia]"
gene complement(12554..13198)
/locus_tag="wEsol_01840"

```

CDS complement(12554..13198)  
 /locus\_tag="wEsol\_01840"  
 /codon\_start=1  
 /transl\_table=11  
 /fullproduct="qcoverage 100 , hcoverage 100 , similarity 100 , identity 100 , evalue 1.25e-152 , alnlength 214 , Bacteria , Proteobacteria , WP\_015589325.1 MULTISPECIES: dienelactone hydrolase family protein [Wolbachia]"  
 /cog="COG0400 COG0400 207 Predicted esterase"  
 /pfam="Abhydrolase\_2 DLH DUF676 FSH1 Abhydrolase\_5 Abhydrolase\_6 Abhydrolase\_1 Esterase Peptidase\_S9 Abhydrolase\_6"  
 /product="dienelactone hydrolase family protein"  
 /translation="MIELKGPEICAGGNKKNLIIFLHGWGSSGDNFIHLAKVMSKFLLSGYFAVPNAPFEREIGDGYQWFSLEDRSEEEALYNGVKNATSIVNHFIDTKLKLNLKDTQLSLVGFSQGAMLAIH TALTRSQCASVVAYSGRFLSPSKTAP EIKSKPNICVIHGDADDVVPFSSLDLAVKALKENG VNV EGHPIHALGHIINEEGIKLGVEFIKKNFKN"  
 /besthit="qcoverage 100 , hcoverage 100 , similarity 100 , identity 100 , evalue 1.25e-152 , alnlength 214 , Bacteria , Proteobacteria , WP\_015589325.1 MULTISPECIES: dienelactone hydrolase family protein [Wolbachia]"

gene complement(13596..13961)  
 /locus\_tag="wEsol\_01841"

CDS complement(13596..13961)  
 /locus\_tag="wEsol\_01841"  
 /codon\_start=1  
 /transl\_table=11  
 /fullproduct="qcoverage 100 , hcoverage 100 , similarity 100 , identity 100 , evalue 1.05e-74 , alnlength 121 , Bacteria , Proteobacteria , WP\_064125381.1 MULTISPECIES: hypothetical protein [unclassified Wolbachia]"  
 /translation="MIDKGQEDEFMKQYMDTCKEQIEKLA KDPELLNQTLKPFMQMSQQLMAGGMLEGAMPGMIPDLGSM DVNKMIAQM KEMIDYIRGN YKELMKEHSSQIQELDESSKKLRGLVKKLIEKIESK"  
 /product="hypothetical protein"  
 /besthit="qcoverage 100 , hcoverage 100 , similarity 100 , identity 100 , evalue 1.05e-74 , alnlength 121 , Bacteria , Proteobacteria , WP\_064125381.1 MULTISPECIES: hypothetical protein [unclassified Wolbachia]"

gene complement(14083..15750)  
 /locus\_tag="wEsol\_01842"

CDS complement(14083..15750)  
 /locus\_tag="wEsol\_01842"  
 /codon\_start=1  
 /transl\_table=11  
 /pfam="Creatinase\_N Peptidase\_M24"  
 /fullproduct="qcoverage 100 , hcoverage 100 , similarity 100 , identity 100 , evalue 0.0 , alnlength 555 , Bacteria , Proteobacteria , WP\_015589327.1 MULTISPECIES: aminopeptidase P family protein [unclassified Wolbachia]"  
 /translation="MSKIEEFRSFMRAINAEAFMLHTKDEYLNEYSEELTKLCGFTGTNGLLIVTKNNKCPFFTDGRYITQAHNQLDQGNFQVYNIQEEDPREWIKANLTSTASLGYYLQYFTTIEDIRKYENICKLIPCLAGKKS DYRKQAVVLHSIEHAGESSKDKCEKVAKSIDKEAEAVLLTDPNSISWLLNLRNENAKYTPCILGRAILYKSGNVNLFIQDKEHSTIEANLGNHINIFDISELENSLHKLNSIVMDPSTTPMSIMAVIKDKQVAEREDPCLIIYKAAKNQTEIAGAINAHIRDGVAVTNFLSWLENNVGTELEAEKILEYRKEQNLFKQLSFPTISAFNENGAI IHYRASSKTNKVIQKNGLYLIDSGGQYLSGTTDVTRTVVGNPTNEQIIHYTIVLKAHIAIASVIFPPGTTGGELDILARTHLWKFGMDYMHGTGHGVGSYLSVHEGPQAISKSNKVKLTPGMILSN EPGYYIPGEYGIRIENLIYVDRQENGFLNFKQLTSIP

```

YDRRLINVQMLTKDEIEWINGYHQFVYKNLENSVKDKEWLKKVCDPL"
/product="aminopeptidase P
family protein"
/besthit="qcoverage 100 , hcoverage 100 , similarity 100
, identity 100 , evalue 0.0 , alnlength 555 , Bacteria ,
Proteobacteria , WP_015589327.1 MULTISPECIES:
aminopeptidase P family protein [unclassified Wolbachia]"
gene complement(15759..16442)
/locus_tag="wEsol_01843"
CDS complement(15759..16442)
/locus_tag="wEsol_01843"
/codon_start=1
/transl_table=11
/product="hypothetical protein"
/pfam="Pfam-B_11335 GIDA_assoc_3"
/tigr="TIGR00136 gidA 616 tRNA uridine
5-carboxymethylaminomethyl modification enzyme GidA"
/translation="MIDDLVTGKGVIEPYRLFTSRAEYRLAIRSDNADRRLTQKGYDIS
LVSHERYSVLQNKLESIKQLEEKLGSLTITPEQLRSYGIIKISYDGIKRTALDLLSYPN
IDWNKLQEIWPELSSITRWGTAMGSITKNEICEAVEIEAKYKPYLIRQEADMKFLRE
EINTQIPIDFNYSQVKGLSSEVIEKLQTIKPATIGIAKQIQGITPAAIVSILVYLRNR
KTKVAANFV"
/cog="GidA COG0445 621 Flavin-dependent tRNA uridine
5-carboxymethylaminomethyl modification enzyme GidA"
/besthit="qcoverage 100 , hcoverage 40.0352733686067 ,
similarity 99.6 , identity 99.6 , evalue 2.06e-149 ,
alnlength 227 , Bacteria , Proteobacteria ,
WP_006279401.1 tRNA
uridine-5-carboxymethylaminomethyl(34) synthesis enzyme
MnmG, partial [Wolbachia endosymbiont of Muscidifurax
uniraptor]"
gene complement(16442..17680)
/locus_tag="wEsol_01844"
CDS complement(16442..17680)
/locus_tag="wEsol_01844"
/codon_start=1
/transl_table=11
/product="hypothetical protein"
/pfam="HI0933_like GIDA FAD_oxidored Pyr_redox_2 DAO
FAD_binding_2 Pyr_redox"
/tigr="TIGR00136 gidA 616 tRNA uridine
5-carboxymethylaminomethyl modification enzyme GidA"
/translation="MHKYDVVVVGGGHAGCEAAAAAARLGANTLLITHKISTIGEMSC
NPAIGGVAKGVVREVDALDGIMGRAIDQASIHVSILNSSRGAAVWGPRVQADRKLYK
QAIQEIILNYYNLTVKEESVDDFLIESNNNGELCIKAVITSSGEHILTSKVVLTTGTF
LQGVIIHIGEQATPSGRMGDKSAVELANTLKKYNFKLGRLRTGTPPRLDRGTINWSILQ
EQVGDNPPVPFESYLTEKINQPQVSCFITHNTNETHKIIIRENLHRSASSYLDDVVAPRY
CPSIEVKVKKFAEKSSHQIFLEPEGLNDDTIYPNGISNSLPPIEVQCEMIKSIKLENA
EILRPGYAVEYDYIDPRELSHTLETKKIKGLYFAGQINGTTGYEEAAGQGIIAGINAA
LSASEKKKALFFIAQTHISA"
/cog="GidA COG0445 621 Flavin-dependent tRNA uridine
5-carboxymethylaminomethyl modification enzyme GidA"
/besthit="qcoverage 97.0873786407767 , hcoverage 62.5 ,
similarity 100 , identity 99.8 , evalue 6.27e-282 ,
alnlength 400 , Bacteria , Proteobacteria ,
WP_141456648.1 MULTISPECIES: tRNA
uridine-5-carboxymethylaminomethyl(34) synthesis enzyme
MnmG [unclassified Wolbachia]"
gene complement(18078..18350)
/locus_tag="wEsol_01845"

```

CDS complement(18078..18350)  
 /locus\_tag="wEsol\_01845"  
 /codon\_start=1  
 /transl\_table=11  
 /fullproduct="qcoverage 100 , hcoverage 88.2352941176471 , similarity 100 , identity 100 , evalue 4.04e-51 , alnlength 90 , Bacteria , Proteobacteria , EAL58956.1 hypothetical protein WwAna1196 [Wolbachia endosymbiont of Drosophila ananassae]"  
 /translation="MDITLLAKLNAFLLSYDSVEYNGMNEVVNAPSAKNARNRLAKRNEEKNMSAREFAPITVAINTSLINPEILEIAVKKLVKILLNIPLLH"  
 /product="hypothetical protein"  
 /besthit="qcoverage 100 , hcoverage 88.2352941176471 , similarity 100 , identity 100 , evalue 4.04e-51 , alnlength 90 , Bacteria , Proteobacteria , EAL58956.1 hypothetical protein WwAna1196 [Wolbachia endosymbiont of Drosophila ananassae]"

gene 18406..19581  
 /locus\_tag="wEsol\_01846"

CDS 18406..19581  
 /locus\_tag="wEsol\_01846"  
 /codon\_start=1  
 /transl\_table=11  
 /fullproduct="qcoverage 100 , hcoverage 100 , similarity 100 , identity 99.2 , evalue 2.80e-256 , alnlength 391 , Bacteria , Proteobacteria , CDR79481.1 integral membrane protein MviN,hypothetical protein,integral membrane protein MviN,MviN-like protein [Wolbachia endosymbiont of Drosophila simulans wAu]"  
 /cog="MviN COG0728 518 Uncharacterized membrane protein, putative virulence factor"  
 /pfam="MVIN Polysacc\_synt MatE"  
 /tigr="TIGR01695 mviN 506 integral membrane protein MviN"  
 /product="integral membrane protein MviN,hypothetical protein,integral membrane protein MviN,MviN-like protein"  
 /translation="MIQIFAPGFDQSKFTLTVTLSRIMMPYIIIFVSIASLIGGMLQVKQHFASTAIAPIVLNLCLIISLFPYPVKTPAHNLSIAVLIGGVFQLLMLFSAYKLKAAFSFSLELSNEVRLFFKRVVPAIINNCVTQISLWIDTIMASFIPNAVSYYADRLNQLPQGIIGTAIGTVLLPLISKQVDNTENIVKIQNKALNIGLMLIMPTTAAFIIPDIILLTLFSYGRFDHYAVQQTVPPTLIAFSLSLPAFIINKVLLPTFFAKGNLKIPTIFSLMCLGINVVLNLLLMMNEYQHTGIAIATSVSTWINSILLISYLTINKMYKVSQALLNVMKIFVATAVMSIALYIFNSLLAGLFFDKMLARIVYLTTLIALSVIVYFGILYLIFKGNFKHV"  
 /besthit="qcoverage 100 , hcoverage 100 , similarity 100 , identity 99.2 , evalue 2.80e-256 , alnlength 391 , Bacteria , Proteobacteria , CDR79481.1 integral membrane protein MviN,hypothetical protein,integral membrane protein MviN,MviN-like protein [Wolbachia endosymbiont of Drosophila simulans wAu]"

gene 19585..22128  
 /locus\_tag="wEsol\_01847"

CDS 19585..22128  
 /locus\_tag="wEsol\_01847"  
 /codon\_start=1  
 /transl\_table=11  
 /pfam="AsmA AsmA\_2 AsmA\_2 AsmA AsmA\_2"  
 /fullproduct="qcoverage 100 , hcoverage 100 , similarity 100 , identity 100 , evalue 0.0 , alnlength 847 , Bacteria , Proteobacteria , WP\_141456647.1 MULTISPECIES: hypothetical protein [unclassified Wolbachia]"

gene

CDS

```
/translation="MRLSLYAILSISLLLLILMHVAATFKDWSGYRKYIIKELEKTYDA
KVHIGGKIKVSLITPKLTIYVYVQYNENKEQKLSDLISVRKIEIRPSFLSLFLSFLQ
PKSITLFGMKS NKENLLNIINTNASGNTVDIVIKDSQVSFKNDFADIVNIKEVAVKKN
KQFFGKVKVGDNNYDFSGKVNITKRVNHISVESNFVNLLFTGNRNQEEQLQGNLTLTIN
NSSGSVSDLAKIINLSFLSCVIPSENIKISSNISLNESEFTATDLKIDSKSMQASGTI
QNDRKGNHTNFNISFSKVDLDSIQNDSQRTMNMKDLLECFRAVVVPKNLSLNFNMEASN
IQYQNKILDNFRAVLKSTDGKVKVNTLLKFPGINNISYLSGEISNNNVLSEFNGDLLV
EGNDFESFISCFPPSIKMKENQKNQFTLSSKLHLAPRILSISDIRLLNNKESLQGSIR
VSHTKKHNVVNGEF SMHNL DADKYDHSLSLSPKMQWLKNFQYDANIKARVNNLTLDN
TKIKNLDFLLKMEKGKLVADKIKLSGEDFDITGNAKILADQKYAKPLLDVNLTGSKFN
GNIFKLPNLVETKRNSRNEIDQIQWSTKQLDFLDDKEGFDANVQINTAEFKTEQNVLK
DFNLDAVMRNNITITIRQASYVLEHGQVFFQGYLRSDSINTRFSIVNLDTKKIGKVIGI
DNVNGQVSLNGEIKTQGKSFHDWASNLSGDVNLQAQGIEVTNVDFNSFITNLLSSKNK
SEISTLAYVDIYNGKTSFENISGKASIKSGICSTSLQFGIDQASGSISSNLTLNLFAL
ASIFRFFFIPPNYSNPIYIDMHLDGPIWRPKMSFDVDQIFTALVGKKNS"
/product="hypothetical protein"
/besthit="qcoverage 100 , hcoverage 100 , similarity 100
, identity 100 , eval 0.0 , alnlength 847 , Bacteria ,
Proteobacteria , WP_141456647.1 MULTISPECIES:
hypothetical protein [unclassified Wolbachia]"
complement(22392..23375)
/locus_tag="wEsol_01848"
complement(22392..23375)
/locus_tag="wEsol_01848"
/codon_start=1
/transl_table=11
/fullproduct="qcoverage 97.5535168195719 , hcoverage
80.352644836272 , similarity 100 , identity 100 , eval 7.11e-230 ,
alnlength 319 , Bacteria , Proteobacteria ,
WP_015589331.1 MULTISPECIES: phage portal protein
[unclassified Wolbachia]"
/cog="COG4695 COG4695 398 Phage-related protein"
/pfam="Phage_portal"
/tigr="TIGR01537 portal_HK97 343 phage portal protein,
HK97 family"
/product="phage portal
protein"
/translation="MNFNIFQRKKS AVFTKYSALQLMMEPSWSKR DYVSFAEEGYIKN
VIAFRAINMIASAASSVPLTLCQLTEQGKS QLKAHPLLKLLYSPNPM TSKSEFIEGIV
TYRLVNGNSYILMVESQNNRKPPTELYLLRPDRVEIVPGRNNVPYNYRYAINNNSYDF
KVDKLTGRSAVLHLKTFNPLNDWYGLSPIEAAAYSIDQHNQAGAWNQAMLQNGARPSG
AIVVKS AKDGS GGSLSQEYQRLKAQINDHYS GPVNAGRPI LLEGGLEWKEMSLSPRD
MDFIESKHSSARDIALAFGVPPQLLGIPGDNTYSNLVEARLSLGNRRFYQR"
/besthit="qcoverage 97.5535168195719 , hcoverage
80.352644836272 , similarity 100 , identity 100 , eval 7.11e-230 ,
alnlength 319 , Bacteria , Proteobacteria ,
WP_015589331.1 MULTISPECIES: phage portal protein
[unclassified Wolbachia]"
complement(23850..24083)
/locus_tag="wEsol_01849"
complement(23850..24083)
/locus_tag="wEsol_01849"
/codon_start=1
/transl_table=11
/pfam="Pfam-B_1254"
/fullproduct="qcoverage 100 , hcoverage 100 , similarity
100 , identity 100 , eval 1.35e-43 , alnlength 77 ,
Bacteria , Proteobacteria , WP_012673333.1 MULTISPECIES:
DUF6290 family protein [Wolbachia]"
/translation="MANSKFSITFNNEISECLAGLAKIRNKS IKELAEKLIQEAIENE
```

```

EDKILIERAARRNVSGVKKIRSEDVDWNTILSS"
/product="DUF6290 family
protein"
/besthit="qcoverage 100 , hcoverage 100 , similarity 100
, identity 100 , evalue 1.35e-43 , alnlength 77 ,
Bacteria , Proteobacteria , WP_012673333.1 MULTISPECIES:
DUF6290 family protein [Wolbachia]"
gene 24335..24952
/locus_tag="wEsol_01850"
CDS 24335..24952
/locus_tag="wEsol_01850"
/codon_start=1
/transl_table=11
/fullproduct="qcoverage 100 , hcoverage 100 , similarity
100 , identity 100 , evalue 8.54e-151 , alnlength 205 ,
Bacteria , Proteobacteria , WP_141456645.1 MULTISPECIES:
lipoyl(octanoyl) transferase LipB [unclassified
Wolbachia]"
/cog="LipB COG0321 221 Lipoate-protein ligase B"
/pfam="BPL_LplA_LipB"
/tigr="TIGR00214 lipB 187 lipoyl(octanoyl) transferase"
/product="lipoyl(octanoyl)
transferase LipB"
/translation="MTEWLISNQLIDYNCAVKSMEEKIQQIHNNSADELVWLLQHPPL
YTAGISATADDIVEKLFPIYKTGRGGKHTYHGPQRIIYMLNLKKRNKCDIKLYIRD
LSKWIINVVKQFNILGEFREDRIGIWNHNGVEKKIAAFGIRLRKWVTYHGIALNVFP
DLSHYKGIIPCGLQDYGVTSMEEELGVKVPLSELDDILKKEFYKIF"
/besthit="qcoverage 100 , hcoverage 100 , similarity 100
, identity 100 , evalue 8.54e-151 , alnlength 205 ,
Bacteria , Proteobacteria , WP_141456645.1 MULTISPECIES:
lipoyl(octanoyl) transferase LipB [unclassified
Wolbachia]"
gene 24952..25320
/locus_tag="wEsol_01851"
CDS 24952..25320
/locus_tag="wEsol_01851"
/codon_start=1
/transl_table=11
/product="hypothetical protein"
/pfam="Peptidase_S66"
/translation="MIVYLLYFILTLCAITGIHAIDQVDIIAPSSKKGESDLTTIKEY
VEALDFNPHISEKIYSNDNPFYSNSDEFRANDLISALTNDSKIWCIRGGEGASRLIP
YLEKLPNDKKERIAQNKSS"
/cog="LdcA COG1619 313 Uncharacterized proteins, homologs
of microcin C7 resistance protein MccF"
/besthit="qcoverage 98.3606557377049 , hcoverage
35.1906158357771 , similarity 100 , identity 100 , evalue
4.04e-75 , alnlength 120 , Bacteria , Proteobacteria ,
WP_197907444.1 LD-carboxypeptidase [Wolbachia
endosymbiont of Kradibia gibbosae]"
gene 25392..25976
/locus_tag="wEsol_01852"
CDS 25392..25976
/locus_tag="wEsol_01852"
/codon_start=1
/transl_table=11
/product="hypothetical protein"
/pfam="Peptidase_S66 ubiquitin"
/translation="MLEMIVNNSISESSVKKLKLILNKQDSIRFDKLMINNGIRLK
DGRLLSKIIGNMTLVENSIGTVWQINAKGKILFLEDIRVYPYAIERSLDHLKQAHIF

```

DGVHAVIFGDFVNCYNDNLVEVVKERFAKSVNFPVFTMKGVGHGHTNDPLPFNTHAI I  
 SVQDEKEGLFFMDVQNLANLIANASSTSCRRSIS"  
 /cog="LdcA COG1619 313 Uncharacterized proteins, homologs  
 of microcin C7 resistance protein MccF"  
 /besthit="qcoverage 100 , hcoverage 56.891495601173 ,  
 similarity 100 , identity 100 , evaluate 1.29e-130 ,  
 alnlength 194 , Bacteria , Proteobacteria ,  
 WP\_015589333.1 MULTISPECIES: LD-carboxypeptidase  
 [unclassified Wolbachia]"  
 gene complement(26320..27138)  
 /locus\_tag="wEsol\_01853"  
 CDS complement(26320..27138)  
 /locus\_tag="wEsol\_01853"  
 /codon\_start=1  
 /transl\_table=11  
 /product="hypothetical protein"  
 /pfam="Terminase\_6"  
 /translation="MISENKEIIYSIKKPAPPFLVPVTRVTTNEYKSWITASSARMT  
 PVILYSREEGQLLYPLDGGKEEVEMIKVELGSYAFAAQYQQNPLPLSSGIIKREWLKR  
 YRNFSDSLSYVTQSWDTAVSTSSMSNFSVCTTWTKVGNKFYLLDVYRAKLEYPKLKEQ  
 VLSLAARWTPHAILIEAKTSGQQLVQELKTNSDLPIIEIVPHDDKLTRFYQIVPIIES  
 GKVFLPHQAVWLNDFEYEILMFPETRHDDQVDSTVQYLQWVRDSSSRVAALRAL"  
 /besthit="qcoverage 100 , hcoverage 78.1609195402299 ,  
 similarity 99.6 , identity 99.6 , evaluate 2.20e-193 ,  
 alnlength 272 , Bacteria , Proteobacteria , EAL59854.1  
 phage uncharacterized protein, partial [Wolbachia  
 endosymbiont of Drosophila simulans]"  
 gene complement(27128..27784)  
 /locus\_tag="wEsol\_01854"  
 CDS complement(27128..27784)  
 /locus\_tag="wEsol\_01854"  
 /codon\_start=1  
 /transl\_table=11  
 /product="hypothetical protein"  
 /pfam="Terminase\_6"  
 /translation="MNFLKFIELCFQTVPVPGCEYNDYQYIKVIADRLEAANVGKMRI  
 IFNMPPRSMKSLCASVAWPAWILGNQPTARIIVASYSRLLSEKHS�DTRCIMQSSWYR  
 ELFPEVELSKDQNTKYKFQTVQRGYRIATSVGGTLTGEGGDFIIVDDPLSPAQALSET  
 FRKRATNWFDQTLVTRLNDRKKGIVIVLVMHRLHQEDLTGTPSLQTEKHMEPYLFTDDI  
 "  
 /cog="COG5410 COG5410 305 Uncharacterized protein  
 conserved in bacteria"  
 /besthit="qcoverage 91.2844036697248 , hcoverage  
 40.8624229979466 , similarity 100 , identity 100 , evaluate  
 1.47e-138 , alnlength 199 , Bacteria , Proteobacteria ,  
 WP\_015589334.1 MULTISPECIES: phage terminase large  
 subunit [unclassified Wolbachia]"  
 gene complement(28575..29372)  
 /locus\_tag="wEsol\_01855"  
 CDS complement(28575..29372)  
 /locus\_tag="wEsol\_01855"  
 /codon\_start=1  
 /transl\_table=11  
 /fullproduct="qcoverage 100 , hcoverage 100 , similarity  
 100 , identity 100 , evaluate 4.05e-197 , alnlength 265 ,  
 Bacteria , Proteobacteria , WP\_141456644.1 MULTISPECIES:  
 phosphoribosylformylglycinamide synthase subunit PurQ  
 [unclassified Wolbachia]"  
 /cog="PurL COG0047 231 Phosphoribosylformylglycinamide  
 (FGAM) synthase, glutamine amidotransferase domain"

```

/pfam="GATase_5 GATase_3"
/tigr="TIGR01735 FGAM_synt 1307
phosphoribosylformylglycinamide synthase"
/product="
phosphoribosylformylglycinamide synthase subunit PurQ"
/translation="MKITVLSGYGLNCEKETAFMECSRKLGINIEVKIVHINDII
DNPGEKLSNILAIPGGFSYGDDTGAGNAFALRIKNNLLDEFQEFSLQDKLIIGICNG
CQILVKLIPEFSNLALIHNDIGNYQCRWIRVRVNSKNSVWLRGLSELYLPIAHGEGK
FFMDQDTLNQLIESNSAALRYIDENGNYANLQFPHNPNGSTYDLAALSDKSGRVLALM
PHPERGIFFTQQDNWPLEKEKCKRLGVAMPKYGDGMLIFENALKYFC"
/besthit="qcoverage 100 , hcoverage 100 , similarity 100
, identity 100 , evalue 4.05e-197 , alnlength 265 ,
Bacteria , Proteobacteria , WP_141456644.1 MULTISPECIES:
phosphoribosylformylglycinamide synthase subunit PurQ
[unclassified Wolbachia]"
gene complement(29379..30629)
/locus_tag="wEsol_01856"
CDS complement(29379..30629)
/locus_tag="wEsol_01856"
/codon_start=1
/transl_table=11
/pfam="DUF3333 BPD_transp_1"
/fullproduct="qcoverage 100 , hcoverage 100 , similarity
100 , identity 100 , evalue 4.03e-280 , alnlength 416 ,
Bacteria , Proteobacteria , WP_015589336.1 MULTISPECIES:
phosphate ABC transporter permease PstA [unclassified
Wolbachia]"
/translation="MSIKKKFLKLLQSRVHARIKRKNKKNRRLRFCSTALVISLGC
PVCILLSILVNSYSALTVTKILLPVEINADLTASNPSDLRYKSIGLLNDSLKVFGG
TDFKDGDEILSRNSYKELEKFFRKKVKDSGEYEIWFTASSIINSINKDKYLNDYAKL
LDWLKEKRRVKKFFNKSLFLKSDSREPENAGILGAFIGSLMTIIVCLALALPIGIMSG
ICLYEFMPKNRLMTNIVEISINNLAAPVSIIFGVVGLTLYLGIFGLPRSSPLVGGMTL
SFMMLPNII IATKNAFANVPITIKDAAAFALGAPHIKVILDHSLPIALPRIIHGTVLAI
ARILGESSPLLMMGMVAFIADTPTSFFDPATVLPVQIYIWSSNPEIAFVELAAIAIIA
LLLVLFLALNLVANFVKRKEFFNF"
/product="phosphate ABC
transporter permease PstA"
/besthit="qcoverage 100 , hcoverage 100 , similarity 100
, identity 100 , evalue 4.03e-280 , alnlength 416 ,
Bacteria , Proteobacteria , WP_015589336.1 MULTISPECIES:
phosphate ABC transporter permease PstA [unclassified
Wolbachia]"
gene complement(30713..31090)
/locus_tag="wEsol_01857"
CDS complement(30713..31090)
/locus_tag="wEsol_01857"
/codon_start=1
/transl_table=11
/fullproduct="qcoverage 100 , hcoverage 100 , similarity
100 , identity 100 , evalue 2.25e-80 , alnlength 125 ,
Bacteria , Proteobacteria , WP_006279489.1 MULTISPECIES:
50S ribosomal protein L19 [Wolbachia]"
/cog="RplS COG0335 115 Ribosomal protein L19"
/pfam="Ribosomal_L19"
/tigr="TIGR01024 rplS_bact 114 ribosomal protein L19"
/product="50S ribosomal
protein L19"
/translation="MTNLLKKFNEQQMQVLAKIPEFRPGDDLKVTFKVVDGTSERIQ
IFEGVCISKRNRLHSSFAVRKVSHGESIVSQFFVYSPALVSVQVTRKGKVRRAKLYY
LCKLFGKAARIKERTTYVKKKSK"

```

```

/blasthit="qcoverage 100 , hcoverage 100 , similarity 100
, identity 100 , evalue 2.25e-80 , alnlength 125 ,
Bacteria , Proteobacteria , WP_006279489.1 MULTISPECIES:
50S ribosomal protein L19 [Wolbachia]"
gene complement(31074..31784)
/locus_tag="wEsol_01858"
CDS complement(31074..31784)
/locus_tag="wEsol_01858"
/codon_start=1
/transl_table=11
/fullproduct="qcoverage 100 , hcoverage 100 , similarity
100 , identity 100 , evalue 4.35e-173 , alnlength 236 ,
Bacteria , Proteobacteria , WP_007549279.1 MULTISPECIES:
tRNA (guanosine(37)-N1)-methyltransferase TrmD
[Wolbachia]"
/cog="TrmD COG0336 240
tRNA-(guanine-N1)-methyltransferase"
/pfam="tRNA_m1G_MT"
/tigr="TIGR00088 trmD 233 tRNA
(guanine(37)-N(1))-methyltransferase"
/product="tRNA
(guanosine(37)-N1)-methyltransferase TrmD"
/translation="MAFNVTILTIFPEMFPGFLNYSLAGKALEKKIWNLEVINIRSFA
KDKHSTVDDVPYGGGAGVMRSDVVGDAVDSMLSVHKNTKFIYMTPSGTFKNQNIARE
LLEFPHITILCGRFEGIDQRIIDAYTPYELSIGDYILSGGEPAA MVVLDACIRLLPGV
VNNTDSITEESFN YGGGVLEYPQYTRPEQWKGYKVPEVLLSGNHKKISDWRQKQSHVI
TKKRRPELLSGEINDKFT"
/blasthit="qcoverage 100 , hcoverage 100 , similarity 100
, identity 100 , evalue 4.35e-173 , alnlength 236 ,
Bacteria , Proteobacteria , WP_007549279.1 MULTISPECIES:
tRNA (guanosine(37)-N1)-methyltransferase TrmD
[Wolbachia]"
gene 31859..32581
/locus_tag="wEsol_01859"
CDS 31859..32581
/locus_tag="wEsol_01859"
/codon_start=1
/transl_table=11
/fullproduct="qcoverage 100 , hcoverage 100 , similarity
100 , identity 100 , evalue 1.06e-166 , alnlength 240 ,
Bacteria , Proteobacteria , WP_015589337.1 MULTISPECIES:
phosphoribosylaminoimidazolesuccinocarboxamide synthase
[unclassified Wolbachia]"
/cog="PurC COG0152 247
Phosphoribosylaminoimidazolesuccinocarboxamide (SAICAR)
synthase"
/pfam="SAICAR_synt"
/tigr="TIGR00081 purC 279
phosphoribosylaminoimidazolesuccinocarboxamide synthase"
/product="
phosphoribosylaminoimidazolesuccinocarboxamide synthase"
/translation="MSLNKTIYEGKAKAIETEDSSTVIQHFKDDVTA FNKEKEYEII
GKGIINNHSVSAFIMEKLEEAGISTHFIKTLNEREQLVKKLKIIPLEVVRNVAAGSFC
KRFNIKEGERLASPIIEFFYKNDDLADPMVNENHILYFDWLSSKEMDEVKTTTLKINE
ILTDLFSNAGIDLVDLKL EFGRLINDSTKIILADEISP DNCRLWDKN TYKKLDKDVFR
LNLGDLKEAYLEVAKRLSVKLG"
/blasthit="qcoverage 100 , hcoverage 100 , similarity 100
, identity 100 , evalue 1.06e-166 , alnlength 240 ,
Bacteria , Proteobacteria , WP_015589337.1 MULTISPECIES:
phosphoribosylaminoimidazolesuccinocarboxamide synthase

```

```

gene      [unclassified Wolbachia]"
          complement(32578..33615)
          /locus_tag="wEsol_01860"
CDS       complement(32578..33615)
          /locus_tag="wEsol_01860"
          /codon_start=1
          /transl_table=11
          /fullproduct="qcoverage 100 , hcoverage 100 , similarity
100 , identity 100 , evalue 3.40e-252 , alnlength 345 ,
Bacteria;Eukaryota , Proteobacteria;Arthropoda ,
WP_007549277.1 MULTISPECIES:
phosphoribosylformylglycinamide cyclo-ligase
[Wolbachia]"
          /cog="PurM COG0150 345 Phosphoribosylaminoimidazole (AIR)
synthetase"
          /pfam="AIRS AIRS_C"
          /tigr="TIGR00878 purM 332
phosphoribosylformylglycinamide cyclo-ligase"
          /product="
phosphoribosylformylglycinamide cyclo-ligase"
          /translation="MNTYTRSGIDIELYNKLIKEVKPIAQETTREVEISEIGSFSALE
DFAALSKKYDHPVLVSSTDGVTGKLLIAQEVNKHDTIGIDLVMCVNDLLAQGATPLF
FLDYFATGVLTKDVLSSVVGKIAEGCKQAKIALVGGETAEMPGMYGNNHYDLAGFVVG
VVDKQILPNCSSMMKAGDYIVGLESSGIHSNGFSLVRHVFKSLGINYNDTSLWNNKSW
SEILLEPTKIYVDSLLPIMSQVKGIAHITGGGLVDNIPRILPKNLFANIDINSWKWPD
IFLWLTKEGKIEKKEMLKTFNCGIGMVLIVSSENMQNVKNHFQKRGEKIEIIGKLDEA
CNPPLDRVVFS"
          /besthit="qcoverage 100 , hcoverage 100 , similarity 100
, identity 100 , evalue 3.40e-252 , alnlength 345 ,
Bacteria;Eukaryota , Proteobacteria;Arthropoda ,
WP_007549277.1 MULTISPECIES:
phosphoribosylformylglycinamide cyclo-ligase
[Wolbachia]"
gene      33749..34042
          /locus_tag="wEsol_01861"
CDS       33749..34042
          /locus_tag="wEsol_01861"
          /codon_start=1
          /transl_table=11
          /pfam="NLBH DUF2328"
          /fullproduct="qcoverage 100 , hcoverage 100 , similarity
100 , identity 100 , evalue 7.66e-59 , alnlength 97 ,
Bacteria , Proteobacteria , WP_006280049.1 MULTISPECIES:
hypothetical protein [Wolbachia]"
          /translation="MNENTKNILLITELLSGRLLDHDFANSMNGITFGVEELEVIDKND
ADAQKEALLFLKESSDDLIYKHKVMKQAYSSSMDNYSFDTKTSNIENYLLKKK"
          /product="hypothetical protein"
          /besthit="qcoverage 100 , hcoverage 100 , similarity 100
, identity 100 , evalue 7.66e-59 , alnlength 97 ,
Bacteria , Proteobacteria , WP_006280049.1 MULTISPECIES:
hypothetical protein [Wolbachia]"
gene      34048..34401
          /locus_tag="wEsol_01862"
CDS       34048..34401
          /locus_tag="wEsol_01862"
          /codon_start=1
          /transl_table=11
          /pfam="DUF2328"
          /fullproduct="qcoverage 99.1452991452991 , hcoverage
93.5483870967742 , similarity 100 , identity 100 , evalue

```

4.49e-71 , alnlength 116 , Bacteria , Proteobacteria ,  
 WP\_158246746.1 MULTISPECIES: hypothetical protein  
 [Wolbachia]"  
 /translation="MWKIDAYSANKKEDLIEKINKIISNMVLTIASAVAEVELVSULL  
 SQTEDKMLLTIKILNEHKPISKSLVDKLIKNDTNLNTKDINIYMTSLLEYNTMH  
 YTCENNLLEIGLTIT"  
 /product="hypothetical protein"  
 /besthit="qcoverage 99.1452991452991 , hcoverage  
 93.5483870967742 , similarity 100 , identity 100 , evalue  
 4.49e-71 , alnlength 116 , Bacteria , Proteobacteria ,  
 WP\_158246746.1 MULTISPECIES: hypothetical protein  
 [Wolbachia]"

gene complement(34468..35184)  
 /locus\_tag="wEsol\_01863"

CDS complement(34468..35184)  
 /locus\_tag="wEsol\_01863"  
 /codon\_start=1  
 /transl\_table=11  
 /fullproduct="qcoverage 100 , hcoverage 100 , similarity  
 100 , identity 100 , evalue 1.29e-166 , alnlength 238 ,  
 Bacteria , Proteobacteria , QEF50655.1 CBS domain protein  
 [Wolbachia endosymbiont of Drosophila ananassae]"  
 /cog="TlyC COG1253 429 Hemolysins and related proteins  
 containing CBS domains"  
 /pfam="Pfam-B\_9500 CBS CBS CorC\_HlyC"  
 /tigr="TIGR03520 GldE 408 gliding motility-associated  
 protein GldE"  
 /product="CBS domain protein"  
 /translation="MKDLPDLNIFNGLLKFRDCGIMDIMTPRTEICAVDIESSEREII  
 KLIKNTCHTKIPIYKNNFDNVIGFFYVKDVIFNRDKNFNLKHIIQSIVFVPPSMKTTN  
 LFVRMNSSKSCLAIVLDEYGGTDGLISMTDLIEELIPNIDSENEINSEYTITELSQNK  
 FEVSARALIKDIEEDLKIELRDPEEDYVTLGGLILSIAGKVPSVDEVIKYKNGMKFII  
 KDANERYINKIVLDLSDYKN"  
 /besthit="qcoverage 100 , hcoverage 100 , similarity 100  
 , identity 100 , evalue 1.29e-166 , alnlength 238 ,  
 Bacteria , Proteobacteria , QEF50655.1 CBS domain protein  
 [Wolbachia endosymbiont of Drosophila ananassae]"

gene 35632..36705  
 /locus\_tag="wEsol\_01864"

CDS 35632..36705  
 /locus\_tag="wEsol\_01864"  
 /codon\_start=1  
 /transl\_table=11  
 /fullproduct="qcoverage 94.6778711484594 , hcoverage 100  
 , similarity 100 , identity 99.7 , evalue 1.40e-241 ,  
 alnlength 338 , Bacteria , Proteobacteria ,  
 WP\_012673335.1 MULTISPECIES: uroporphyrinogen  
 decarboxylase [Wolbachia]"  
 /cog="HemE COG0407 352 Uroporphyrinogen-III  
 decarboxylase"  
 /pfam="URO-D"  
 /tigr="TIGR01464 hemE 338 uroporphyrinogen decarboxylase"  
 /product="uroporphyrinogen  
 decarboxylase"  
 /translation="MIELLLLLLYFNIQKNKQNRLESGKTTIAKIIKRNEPGRVPIWL  
 MRQAGRSLPEYRKAVENMNNFMEICYNTDLVTELTLPVTRFDMDAIIFSDILIIAD  
 VLGCDEVNFVRGVGPIIKPVESPKELKGPQEIETKTLPIILNAIKKVRSQLPKEKSLIGF  
 AGGPWTVASYIIIEGSSKTFKSVLNFYPSCLKEIIERITEVTIIYLIKQIEFGADVIQ  
 LFDSNAGALSEPLFKEYVIEPTKRIILAIDRFSDFPFIIGFPRSAGNLYKDYCEQTGV  
 SAVSIDYNVPIKWAKANLNIPLQGNLDPNLLAYNKTEAIKEAKRIIDCFRDLPIFNL

```

GHGVLPTDPVENIAALVNLVKSYS"
/besthit="qcoverage 94.6778711484594 , hcoverage 100 ,
similarity 100 , identity 99.7 , evalue 1.40e-241 ,
alnlength 338 , Bacteria , Proteobacteria ,
WP_012673335.1 MULTISPECIES: uroporphyrinogen
decarboxylase [Wolbachia]"
gene 36775..37968
/locus_tag="wEsol_01865"
CDS 36775..37968
/locus_tag="wEsol_01865"
/codon_start=1
/transl_table=11
/fullproduct="qcoverage 100 , hcoverage 100 , similarity
100 , identity 100 , evalue 2.86e-284 , alnlength 397 ,
Bacteria , Proteobacteria , WP_015589340.1 MULTISPECIES:
pyridoxal phosphate-dependent aminotransferase
[unclassified Wolbachia]"
/cog="COG0436 COG0436 393 Aspartate/tyrosine/aromatic
aminotransferase"
/pfam="Aminotran_1_2 Beta_elim_lyase DegT_DnrJ_EryC1"
/tigr="TIGR03540 DapC_direct 383 LL-diaminopimelate
aminotransferase"
/product="pyridoxal
phosphate-dependent aminotransferase"
/translation="MSDLAKRMFLIKPSPTIAVTDKANKLKNegKKICVLAAGEPDFD
TPDHIKKAIIQAISEGKTKYTAVDGTRELKEAIINKLRKDNLEYTLNQICVGTGAKQ
VLFNLFMATINSGDEVIIIPAPYWVSVDVMSVLFGLPVVVECKQNFKLTAELLKSRIT
KKTkWLIILNSPNNPAGAVYTCDELKDIAQILLEYPHMNVVTDDIYEHIIYDEKFFTIA
QVEPKLYDRVFVNGVSKAYAMTGWRIGYIAGRSDVVKAISTLQSQSTSNPNSIAQAA
AAAAALNGDHSFLKERTRIFKSRRDFMVKELNSVPGLSASVPQGAFYLFVSCEGLLSKS
TKSGKIINNDLDFTEYLLGDHLVAVVPGIAFGLENFIRISYATSQEQLIGCDSITKA
CQELK"
/besthit="qcoverage 100 , hcoverage 100 , similarity 100
, identity 100 , evalue 2.86e-284 , alnlength 397 ,
Bacteria , Proteobacteria , WP_015589340.1 MULTISPECIES:
pyridoxal phosphate-dependent aminotransferase
[unclassified Wolbachia]"
gene complement(38022..38510)
/locus_tag="wEsol_01866"
CDS complement(38022..38510)
/locus_tag="wEsol_01866"
/codon_start=1
/transl_table=11
/fullproduct="qcoverage 100 , hcoverage 100 , similarity
100 , identity 100 , evalue 5.40e-108 , alnlength 162 ,
Bacteria , Proteobacteria , WP_015589341.1 MULTISPECIES:
hypothetical protein [unclassified Wolbachia]"
/translation="MNISTIDNTLQNYITKYIEQTFATHVLGNRYDKLYRKLLSGIEE
IIKLAVNEAKHYDENLEDLYNDSRFNKKFIQAVAKHQVLEFLNTYPKRKEIVAEFYNE
HHINESDLKTLEKGDVLNKKINNINLLQQNEKNEEFNIRKTLAQSIKMPSIEKHKLEH
SR"
/product="hypothetical protein"
/besthit="qcoverage 100 , hcoverage 100 , similarity 100
, identity 100 , evalue 5.40e-108 , alnlength 162 ,
Bacteria , Proteobacteria , WP_015589341.1 MULTISPECIES:
hypothetical protein [unclassified Wolbachia]"
gene 38653..38814
/locus_tag="wEsol_01867"
CDS 38653..38814
/locus_tag="wEsol_01867"

```

```

/codon_start=1
/transl_table=11
/fullproduct="qcoverage 100 , hcoverage 100 , similarity
100 , identity 100 , evalue 6.50e-27 , alnlength 53 ,
Bacteria , Proteobacteria , WP_006280042.1 MULTISPECIES:
hypothetical protein [Wolbachia]"
/translation="MDLVTKVKLKIKMKNKGKIINILIICGVIFFIYLIHEPVVDMVEK
IISKIKGLF"
/product="hypothetical protein"
/besthit="qcoverage 100 , hcoverage 100 , similarity 100
, identity 100 , evalue 6.50e-27 , alnlength 53 ,
Bacteria , Proteobacteria , WP_006280042.1 MULTISPECIES:
hypothetical protein [Wolbachia]"
gene 39026..40213
/locus_tag="wEsol_01868"
CDS 39026..40213
/locus_tag="wEsol_01868"
/codon_start=1
/transl_table=11
/fullproduct="qcoverage 100 , hcoverage 100 , similarity
100 , identity 100 , evalue 3.28e-273 , alnlength 395 ,
Bacteria , Proteobacteria , WP_206759926.1 MFS
transporter [Wolbachia endosymbiont of Kradibia
gibbosae]"
/cog="AraJ COG2814 394 Arabinose efflux permease"
/pfam="MFS_1 Sugar_tr MFS_2"
/product="MFS transporter"
/translation="MASLFYAYQYILRVIPNIIPELVVRFNIGTTEIGQFCGLYYVG
YVLAHIPVGILLDRFGSKIVIPICIAITSLGALPLVSSNDWSYSIIIGRIITGIGSSAS
VLGLFKIISIYYRREKFAMMFSSISAIIGISGGVFATKPLHILFNKFGWDYVFVTFITL
GLLLALVSFMFIPKIDTSEERLNIKSLSEVIFNKNVLLISLFGGFMVGPLEGFTDVWS
ATFLHEMYAIDRQVAYNISKWILIGFGFGYLSLSYLLEKKPTKHYEIIISCAMAMIIV
FLLLFCININSLLASILLFIVGFASAYQIVLTAQVVNLVKDDAVASAGSVSNAIVMSF
GYFFHTVIANIMNFYWDGKIVDEKPLYGADVMVKSMLIIPICLLIGMIGFWLLKVISC
KKS"
/besthit="qcoverage 100 , hcoverage 100 , similarity 100
, identity 100 , evalue 3.28e-273 , alnlength 395 ,
Bacteria , Proteobacteria , WP_206759926.1 MFS
transporter [Wolbachia endosymbiont of Kradibia
gibbosae]"
gene 40289..>41299
/locus_tag="wEsol_01869"
CDS 40289..>41299
/locus_tag="wEsol_01869"
/codon_start=1
/transl_table=11
/fullproduct="qcoverage 98.8095238095238 , hcoverage
82.1782178217822 , similarity 100 , identity 99.7 ,
evalue 1.38e-231 , alnlength 332 , Bacteria ,
Proteobacteria , WP_174516952.1 MFS transporter
[Wolbachia endosymbiont of Cardiocondyla obscurior]"
/cog="AraJ COG2814 394 Arabinose efflux permease"
/pfam="MFS_1 Sugar_tr MFS_2 SBF Sugar_tr"
/product="MFS transporter"
/translation="MLQRNFLVWLLASLFYAYQYILRVIPNIIAPELITKFNISITDV
GQFGGLYYVGYTLAHIPIGLALDKFGPKFVLPICIIILTFTGTLPICFDEWYYSILGR
IVVGIGSSASAIGLFKVASMYFAQEKSARMASLSIIIGILGGICGGLPLDFLLDKFGW
NYVIYTFSAFGCLLALLFLVTPESNAQQEKVSIRDNLNLFNKHIIILISFFGGLMVG
PMQGFADGWVKAFFFEVYKMNEDLASSLSSVILIGMLIGSFSLAYLLEKYKNKHYEVI
IVCSFAMIASFLLLFTQAGGLYIVLPALLVIGFASGYQIVTLYKALSYVNNNLVGLKA

```

GG"  
 /besthit="qcoverage 98.8095238095238 , hcoverage  
 82.1782178217822 , similarity 100 , identity 99.7 ,  
 evaluate 1.38e-231 , alnlength 332 , Bacteria ,  
 Proteobacteria , WP\_174516952.1 MFS transporter  
 [Wolbachia endosymbiont of Cardiocondyla obscurior]"  
 gene 4173..4257  
 /locus\_tag="wEsol\_tRNA-34"  
 tRNA 4173..4257  
 /locus\_tag="wEsol\_tRNA-34"  
 /gene="tRNA-Leu"  
 /intronpos="0..0"  
 /program="tRNAscan-SE"  
 /cove\_score="58.0"  
 /evidence=predicted  
 /type="Leu"  
 /anticodon=CAG  
 /product="tRNA-Leu (CAG)"  
 gene complement(17868..17943)  
 /locus\_tag="wEsol\_tRNA-35"  
 tRNA complement(17868..17943)  
 /locus\_tag="wEsol\_tRNA-35"  
 /gene="tRNA-His"  
 /intronpos="0..0"  
 /program="tRNAscan-SE"  
 /cove\_score="67.6"  
 /evidence=predicted  
 /type="His"  
 /anticodon=GTG  
 /product="tRNA-His (GTG)"

# ORIGIN

```

1 agttagcgga atctatgccg agataccgcg gcggtatgac ggttcgcggg ggtatgacgg
61 ttaagtaatt cgatcatccc ctgcttggtta gcgggatcta gagataccgc ggcgggtatga
121 cggttcgcgg cggcatagct atcttcaaaa atatggttga ataattgtta ataatagtgt
181 ataattatta atatttttaa gcactttggc tatggcttta tctaagtttc tcgaccctaa
241 gctggattta acctttaaaa gaatcctttg cactgaaaaa aataagaata ttctcataca
301 ttttttgaat gatatttttag ggtttaccga gataaatact atacaagaag tggaattcct
361 cagtactata atggatcctg aaattgcctc tgataagcaa agtatagttg atggttctttg
421 cagggattct agtgggacca ggtatgtgat tgaaatgcag cttactcgcg ataaaggctt
481 cgaaaaacga gctcaactgt atgctgctaa ggcttactca agacaattag ataaatctgg
541 caactacatt gatttaaaga aagtcttctt tattgctata tcaaattgta acttacttcc
601 tgaagaagtt gattatatat ccaaccacac tataagagat gagaaaacca atgagcatga
661 cttaaaagat tttcaattta tatttattga actacctaaa tttcctaaga ataaggaaga
721 acagctagaa agcatagtgg atcggttggt atttttcttc aaatatgcag atgaaactac
781 ggaagaagac ttaaggaaaa tagcagaaaa agcaccaata ataaagttag cctacgatga
841 attagacagg ttttagctgga atgaaaaaga tttagtagct tacgaagaaa gaataatgga
901 tctacggaaa gaagaagcca ttcttaaata cagacttgat cttgctactg aaaaaggcaa
961 aaaaattggt aaagaggaag gcaaaattga aggcaaaatt gaagggaaaa tcgaagtcgc
1021 aaaagcaatg ctggctaata atggtgatgt taacactatt gtcaagttta ctggcctttc
1081 tattagttag attgaagaat taagtgtgaa cggtagcgag taatttcaaa gtgcatttgc
1141 agttggaacg gatacattta atgagagtcc catttcacgg tgttcaaata tactccttct
1201 tgtaccatct cccaaagtgg gctcatttct ctcagtcggc caacatthtt agcaacaaga
1261 tctgctgcat acaaaacttc ttcttttagt gtaaatcggc ctaggccaaa tctaattgat
1321 gaatgctcaa ggtcatggcc attatthtag gaccgtacga cataggaagg ctcaagagac
1381 gcagacgtgc acgcagaacc agaacttact gctaaatcct tgattgccat gatgagagac
1441 tcacctcaa catagggaaa gctcaagttt aggttgccag gaattctatt ttcataatca
1501 ccattthaaa cgatatcagg aaacgcttct tttatcttgt tatacaaaat atcccttaat
1561 tcttccactc tagttgtttc ttttttcatt tcttctttag caatacgtgc cgcttcacca
1621 aaaccaactg caagaggtgt tggaactgtt ccagaacgca tgcctctttc ctgtccacca
1681 ccactaatta gtggtatcag cctaacacga ggattctttc tacggacata taatgcacct

```

|      |             |             |             |             |             |             |
|------|-------------|-------------|-------------|-------------|-------------|-------------|
| 1741 | attcccatag  | gcccataaat  | tttgtggcta  | gagagactca  | taagatcaat  | gcacatctca  |
| 1801 | ttaacatcaa  | ttggaacttt  | tccaaagctt  | tgagctgcat  | ctgtgtggaa  | aaatatatta  |
| 1861 | cgcttcctgc  | atatttcacc  | aatctccttt  | acaggctgaa  | ttactccgat  | ttcattattt  |
| 1921 | accatcatca  | ctgaaaccag  | gattgtttta  | tcagtaattg  | cttcctcaag  | ctttaataaa  |
| 1981 | tctataattc  | cgttttgctt  | aacaggcaaa  | tatgtaactt  | taaagccttc  | attttccaga  |
| 2041 | tgccgacaag  | aatccagaac  | acacttatgc  | tccgtgcaga  | cagttattat  | atgatttcct  |
| 2101 | ttatTTTTat  | aaaagtgagc  | aacgcccttg  | attgccgtat  | tatttgactc  | agttgcacct  |
| 2161 | gaggtaaaga  | taatttcttt  | gctatctgcg  | ttcaccagat  | cagcgatgtg  | tttccttgct  |
| 2221 | ttttccactg  | cttcttcagc  | agtccaacca  | aatgaatggc  | tgcgagagtg  | tgcattactg  |
| 2281 | aactcaccaa  | agtaaggtat  | catcacctct  | aaaacacggg  | gatctacttt  | agtagtagat  |
| 2341 | tgataatcaa  | gaaatatattg | taattttatt  | ttagcatcgt  | gtattttttt  | actttcaaca  |
| 2401 | ttcataaagc  | taccacggag  | acaaaattta  | caattatttt  | atagcattaa  | aacttaattt  |
| 2461 | tttcaagata  | taatcttgca  | tcaagtacaa  | aagtgtcatc  | caagtagctg  | acacataact  |
| 2521 | gtacgaacat  | ttatTTgcga  | aagcagtgtg  | ttaaatgtta  | tagccagttt  | tgcctcaaac  |
| 2581 | acaaaggcag  | tgcccagaca  | ctgggatgac  | accctattgg  | tagcaattgc  | ttccaaatca  |
| 2641 | taatgtttgt  | acagctgtgc  | gccgtgcgct  | ggaatccgtt  | ttagccctta  | tctatatctc  |
| 2701 | agttccacca  | acagttattg  | cgctgacttt  | gagtgtcggc  | tgaccaactc  | caacgggcac  |
| 2761 | atTTTgtcca  | tctttcgagc  | atgtgccaac  | accaggatct  | aactttaagt  | cattaccaac  |
| 2821 | catagatact  | tttttcaaca  | ctgTTtgacc  | gtcaccaatt  | agtgttgctc  | cttttactgg  |
| 2881 | ctgtgtaatt  | ttgccatttt  | ctattaggta  | agcttccgaa  | gatgaaaaaa  | caaattttcc  |
| 2941 | tgacgttata  | tcaacctgcc  | caccaccgaa  | atttactgca  | tatagacctt  | tctttacgct  |
| 3001 | agatattatt  | tccttcggtg  | tatactttcc  | gggcaacata  | taggtgtttg  | tcatgcgcgg  |
| 3061 | cataataact  | tctttataac  | tttctcttct  | accattacca  | gttgggctta  | cacctatgag  |
| 3121 | tttagcgttc  | atatgatcct  | gcatgtatcc  | ttttaggatc  | ccatcctcta  | tcaatatatt  |
| 3181 | ataactgggt  | ggagtgcctt  | catcgtctac  | gctgatagag  | ccgcgcaaat  | tgggcagagt  |
| 3241 | tccgtcatca  | actactgtga  | tgtcactagc  | tgctacttgt  | ttaccacag   | aatttgaaaa  |
| 3301 | tgctgagact  | tttttgcgat  | tgaagtcgcc  | ctcaagtcca  | tgaccacagg  | cttcgtgtaa  |
| 3361 | caatattcct  | ggccagcctg  | gacctaaaac  | gactgtcatt  | tctccggctg  | gagttggaat  |
| 3421 | tgcttcaaga  | tttaccagtg  | cttgttctaa  | cgcttggttt  | gcaacttctt  | tccacttttt  |
| 3481 | ctcagaaata  | aacttactat  | aagagtcctt  | tccaccatgc  | cctgcagaac  | ctctttcggg  |
| 3541 | acggccatct  | ttttctacaa  | tgactagcac  | attaaaacgt  | accagaggcc  | tgatatcgct  |
| 3601 | taatctgtga  | tcacccttta  | ttatTTgtac  | aacttgccat  | tctccactta  | gagttatTTt  |
| 3661 | tacttgcttc  | acgcagttat  | ttttggacct  | tacatactca  | ttaacctcat  | tgagtagctt  |
| 3721 | aatcttttgaa | ttcagatcca  | tttcattttat | aggggttaatc | ctcgaatata  | ggctttttgt  |
| 3781 | ctcttcgttt  | aaattttattg | aattttgtctt | gttttaaagac | actgagcttt  | ttaccataga  |
| 3841 | agcagcatta  | ctaattttctt | tttcgctgat  | ctcagaagaa  | caaacgaaag  | atgtactatc  |
| 3901 | ttcacaaaaa  | gaccttaaac  | caaatcccct  | tctagtattc  | aagtccatgt  | gttttaatat  |
| 3961 | gttatcctca  | aaaaccaggg  | actccgactg  | gcaaaaattct | agaaacagct  | caccaccatc  |
| 4021 | gctattgctc  | aaagcgttat  | tgactatTTt  | atatacgtta  | ttaatattaa  | cattgttttg  |
| 4081 | agcaaaaaat  | atTTtgatcta | gattttggcat | tacctttgaa  | ctaaaaattg  | tttaagtata  |
| 4141 | ttatTTtaact | ttaacatagt  | aaactataaaa | aagcccgggt  | ggcggaattg  | gtagacgcgc  |
| 4201 | tagcttcagg  | tgctagtaac  | tttttaagtt  | gtggaagttc  | aagtcttctc  | tccggcactc  |
| 4261 | ttagcttcca  | tattgcttat  | tgaattaaat  | aatgttataa  | tataacatat  | taggtaatat  |
| 4321 | tcatgctatg  | tatagtgaaa  | aaaataagtt  | agcctgcaga  | aagaaggtag  | gaacttactc  |
| 4381 | gaaacgctta  | gttactacac  | tatctactat  | ctctttcatt  | ggatacatag  | cggcattggg  |
| 4441 | cttgaatatt  | cctgtcttaa  | gtctgtatTT  | tagtattgcc  | tgcactatat  | taagtgtact  |
| 4501 | ttcatctacc  | ttaaacatat  | ggtcatttagc | tgatcatttt  | aggcagcgtg  | atcttaataa  |
| 4561 | gcagcttggt  | gtagaaaaaca | ctcctggaca  | agaaaaacta  | acgaagatct  | gtcttgatat  |
| 4621 | tacatctaac  | gtttttgtttt | taataggagg  | aattacacct  | atattgccct  | ttgaatctcc  |
| 4681 | tatcattcct  | tttgtttcca  | ctgccttttt  | tattctaggc  | tgtgccttta  | tggcaactaa  |
| 4741 | tatcgttcgg  | actaggatta  | gcgaaccaca  | ggcaaaaaaa  | cctactgatg  | accactccct  |
| 4801 | aactgcaaaa  | gcagcttaag  | tattaactta  | tacaggaata  | ttagctatat  | aattccactg  |
| 4861 | aagagagcca  | ttcaaaaagag | ttcgatgtaa  | ttagcgtcaa  | aaaagtgtaa  | gcagaaattg  |
| 4921 | tgggcttatt  | ggggtaggag  | cgcttagtac  | tcctacttcc  | acatcaatta  | cttgaataat  |
| 4981 | tgctcaagct  | atcaaaaataa | aagttttttat | tcagtaattt  | gtgtataaaag | gggtactattt |
| 5041 | tactagtagt  | gaaataaatc  | agaatgaagt  | ctatTTttatt | aacgaggcct  | ttattggact  |
| 5101 | cgttcaatac  | aagaaatata  | ttgagaaagt  | atggatacaa  | agttttttata | gaaccagtat  |
| 5161 | tcacaataaa  | gtactttaaat | cctgatatat  | ctgcgtacga  | atTTtgacgtt | gtgatatcta  |
| 5221 | caagtataaa  | cagtgtaaaag | gctcttagtc  | aaatatgcaa  | agaggatgac  | tttccgatta  |
| 5281 | ttacagttgg  | taattcaacc  | atgcaggctg  | caaaaaattt  | gggattttct  | gatataatct  |

|      |             |            |             |             |             |             |
|------|-------------|------------|-------------|-------------|-------------|-------------|
| 5341 | cagcagacag  | caacgttgat | ggtctgatat  | cattcataaa  | agctcattat  | tcaaacgcaa  |
| 5401 | taaagttctt  | gtatataagg | ggacaagaag  | tatcatgtga  | tctaaaaaag  | agattatctg  |
| 5461 | aagaagattt  | taacataaga | gaagttgtac  | tctataaaac  | aattattaaa  | aggagtctaa  |
| 5521 | ctaatagggtg | taaaaatttg | ctggttgatg  | gtaaaattga  | tagtggttgc  | tttttttcc   |
| 5581 | cacagacagc  | aagggtat   | tggttcattag | ttctaaaaaag | tgggctatct  | catgtgatga  |
| 5641 | gcaatataac  | tgcataatac | atgagtaaaa  | acattgctga  | tagttttaaag | ttaatcaaat  |
| 5701 | ggaaaaaaat  | tataacatcg | agggtgccta  | ctggggagag  | tttaattgat  | ataattaata  |
| 5761 | aggattgttg  | atgctaaaga | ttgcaacttg  | gaacgtaaac  | tctatacgca  | aaagagttaa  |
| 5821 | ccaactttgt  | agttttatag | ttgatagtca  | ggtagatata  | attttgctgc  | aagagataaa  |
| 5881 | atgtacagaa  | gagcaatttc | cttacgcaga  | gatagaaaag  | ttaggatatg  | aatatgctat  |
| 5941 | ctatggacaa  | ggtgcaagaa | atggcgtttg  | tgtcttatct  | aaatatccga  | tactggagaa  |
| 6001 | gtttaaaatt  | gacattgtgg | aaagtcac    | agaagcacgt  | tatatagagt  | gtgtgataaa  |
| 6061 | acacaccaat  | cataaggtaa | gggtaggaag  | tgtatacg    | ccaaacgggc  | aaagccgga   |
| 6121 | ctctcaagca  | tttgaatata | aactcaagtt  | ttttgataat  | ctatatgaaa  | ggatgagcac  |
| 6181 | tttgttaaag  | aatgaagagt | taactattat  | agctggcgat  | tataatgttg  | caccggatga  |
| 6241 | aattgatgtc  | tttgattcaa | acttattgaa  | tggccaagt   | tgctttcata  | taagagaacg  |
| 6301 | tgagaagtta  | agagcgatct | tgaatcttgg  | gtttaaagat  | gcgttttagaa | tatctcacc   |
| 6361 | aaatttgcaa  | caattcactt | ggtggcatta  | tcaaggcaat  | tcactcagaa  | ataatcaagg  |
| 6421 | aatgcgaata  | gattatatgc | tggtatcacc  | acaagctgta  | gataaattgg  | aaacatgcta  |
| 6481 | catagatgat  | agattgcgta | agctagaaaa  | tccgtctgac  | catactcctg  | ttgtatgtgc  |
| 6541 | tatagaataa  | tagtagacct | cttacacaac  | tcactttttg  | gcaaacttag  | gtaatccctg  |
| 6601 | cttgtttggt  | gcttggtgtt | tcttcccttc  | gtttgttttc  | ctttcttg    | caaggttgat  |
| 6661 | cttgctgttt  | gctttcttcg | tttccctgt   | tgttttcctg  | ggaaatttgc  | tcaggaacag  |
| 6721 | gttggtgttc  | actcttttct | tttccttggg  | aaatttgttc  | agaaacagag  | gtgcctttct  |
| 6781 | caacttctgt  | aactggggtt | tttaaaatat  | catcaatgcc  | ctcgagaatt  | tttccattca  |
| 6841 | gttttgctct  | cttttctgta | tcacttttat  | cttgtagagct | agggtcatac  | aaagtacctt  |
| 6901 | ttttgttatt  | tgaaaaaaga | acctccactc  | ctccttttat  | ggcaaataat  | gtgccgatag  |
| 6961 | cagtaagaac  | tactccgagt | gtagtaggac  | caaaaattaa  | cattggaata  | gtggaaagaa  |
| 7021 | ggacaggaaa  | aaagatcttg | cttaagaacg  | ttgttaccat  | ctcttcatac  | ctgagtgggtg |
| 7081 | gttcatcctc  | ttctttcttg | tctttaccta  | agaatgggtat | tttttctttc  | atcccatcca  |
| 7141 | taaaggagcc  | agaaatat   | ttcgggtcta  | ttttgatccc  | tccaattagc  | agcagcagca  |
| 7201 | tttccaatac  | aaactttatg | gatgaatctt  | tagcttctgt  | accgcgtata  | tcagctacac  |
| 7261 | agtcactctac | tacttctttt | attttaccat  | tcttgagatt  | ctcctcatta  | gctaattttt  |
| 7321 | tctctcta    | tttctcaaat | acggaaagta  | aaaactgaga  | aaaatttctct | tcactgagtg  |
| 7381 | gttttatatc  | ttttggattg | acattattaa  | gtagtatgtc  | cttataagct  | gatataaaat  |
| 7441 | aatcagttat  | ttctttgttc | tcctttaatt  | cggctttacc  | ttctaatact  | tttacaaagt  |
| 7501 | aatcatagat  | tacctgatgt | tcctcttttt  | caaaaatttt  | ctcatctttg  | ttagttacct  |
| 7561 | gatttgaagg  | ttccaaattc | tttgtttg    | gagttaatat  | ttttgtcata  | actgagttac  |
| 7621 | tcacattttac | tatacttcaa | ttgtagcata  | tttttcata   | taattcaaat  | aatctatact  |
| 7681 | cttagaatcc  | gccatgttta | agtcataatt  | aagagcccag  | ttgtcgccaa  | cttttatttc  |
| 7741 | tacttcaagt  | ggtatagaaa | tttctactac  | accttccatt  | atatttttca  | caagttttgc  |
| 7801 | tgtttcttgc  | accttttctg | cttctacttc  | aaccagtagt  | tcactcgtgaa | cctggaggat  |
| 7861 | tattttacct  | actttcaatt | gatcaaaaag  | ctgaattgtc  | gcacgtttta  | ttatatcagc  |
| 7921 | agcggttcct  | tgcagtggtg | cgtttattgc  | tgccctttct  | gcaaattgtc  | ttatataagg  |
| 7981 | aattgtattg  | tttatgtctc | ttacaaagca  | tcttctgcca  | aacaaagt    | ctacataacc  |
| 8041 | atgcaatctt  | gcgatagaca | ctgctttttc  | catataggcc  | tttatttctg  | ggtaacagga  |
| 8101 | aaaatagtaa  | ttaatgtatt | cagcagcttc  | cgcaatggta  | attccaagcc  | gctttgcaag  |
| 8161 | accaa       | atgcca     | atataattcc  | aaaattgatg  | gattttgctt  | tgcgctctaa  |
| 8221 | ttgctcatct  | atttcttgca | ctccaaaaac  | ttgcctagcg  | gtgatctcat  | gaatatcttg  |
| 8281 | tccgtttgca  | aaagcttctt | taaatgctgc  | aacgtttgca  | acgtgtgcca  | ggagtctcaa  |
| 8341 | ttctat      | gaatagtcag | cagaaattat  | cttatgccct  | tttggcgcaa  | taaatgcttg  |
| 8401 | tctgataaga  | tttccctctt | cgcttctgat  | aggaatat    | tgtaaattag  | gattgctgga  |
| 8461 | gtcagcctt   | ccagttgcag | ttgcagtcgt  | tgaaaagctt  | gtgtgtattc  | taccatcaat  |
| 8521 | ggaatcaact  | tgctttatta | gcgcacag    | gtaggtgcct  | tttaattttac | ttaaatgtcg  |
| 8581 | ccaatttaag  | attttacttg | cgatttctac  | cccttcttct  | tcgagtgcct  | ctagaacttc  |
| 8641 | ataattgggtg | ctatacgatc | cagatttttt  | tgactttttc  | tttttattaa  | gccccatttt  |
| 8701 | attaaataaa  | acatcactta | attgttttgg  | cgacgcaata  | ttaaatcttt  | cccctgctaa  |
| 8761 | gttatata    | tcacttcaa  | gcacggcaat  | tacctgctga  | aatttatcgg  | acaattcctg  |
| 8821 | taattttt    | atgttcagta | atatcccat   | tttctccata  | tcaaata     | ctttcataag  |
| 8881 | tggcttatcg  | aagcgctcgt | aaattgtgaa  | caatttttcc  | tgaacaacc   | tttgcttag   |

|       |             |             |             |              |             |            |
|-------|-------------|-------------|-------------|--------------|-------------|------------|
| 8941  | cttttcgcga  | attgctatta  | aagtttttgc  | cgagaaaatt   | tctacatctc  | cactcaaatt |
| 9001  | atgtgcaact  | atgtttggaa  | tactgtgatc  | atgctttcct   | gtatccaagc  | tatacgacat |
| 9061  | tatcatcaaa  | tcatacaactg | aatctaacat  | cttctctatt   | gcaggggaaga | ttttcctgat |
| 9121  | ctctttaatg  | ttatgtatta  | ttttaagcac  | tccatttgag   | agtaaagtgtg | agttaattgt |
| 9181  | aataagtgca  | tcttgtatgc  | tgtcttgctc  | tatataaaaa   | atattacttt  | cgctataaga |
| 9241  | taaggaaaatt | ttatttaata  | agttgtcttc  | aaagtggtgcaa | tgaattgcaa  | ttctgccttc |
| 9301  | atatctacaa  | tgctccaaaa  | atttctctaa  | ctcttcacta   | ctatattcta  | ttttctcttt |
| 9361  | tgtgctagac  | ccattatagg  | aaaaaagctt  | ttccatttta   | cctattaaag  | aattgaattc |
| 9421  | atacttcttt  | aaaaaggata  | atagtttttc  | catatttgga   | gaatggactt  | catattttgc |
| 9481  | aatatcatgt  | tgaaggtcta  | cttttcgcga  | tagtgataaa   | agttctcttg  | aaattagagc |
| 9541  | tttttcctta  | tgttcgggtga | gaatattacg  | aatcctcgtt   | tgctcgatat  | tatcaatggt |
| 9601  | ctctataata  | ttattcaatg  | aatcaaattc  | atctagtaat   | ttagctgcag  | tcttcggacc |
| 9661  | tattcccgga  | acgcctggaa  | tgttgtcaga  | tgcataacca   | gtagagaaaa  | ataaatcaag |
| 9721  | aagcttgtgt  | gagtttacac  | caaatttttc  | tattacttgt   | ttttcatcta  | tatatatatt |
| 9781  | tttaatgggg  | tcgaatatta  | aaatattgtg  | gttcaagagt   | tgaaataaat  | ctttatctga |
| 9841  | tgaacgact   | accactttaa  | agtcttggtg  | gttggcgtat   | tttgcagcta  | gtgttgcat  |
| 9901  | tatatcatct  | gcttcataac  | cttcaatctc  | ttcatagctg   | agggttaaaag | cttctaccgc |
| 9961  | ttctctcagt  | atggtaaact  | gtggagttag  | atcctcagga   | ggcgttactc  | tgttcgcttt |
| 10021 | gtactcagga  | tataaatcgt  | gcctaaaatt  | cttttttcct   | gcatcaagtg  | ctatagttaa |
| 10081 | atagtcgaa   | tgggcaatgt  | acttaagaac  | catattcaga   | aagccatata  | caccacctat |
| 10141 | tggcattcct  | gttgtggtaa  | ttaagtggag  | tagtacatag   | taagctctga  | aaagaaaacc |
| 10201 | atagccatcg  | atgattgtga  | aagttttttc  | tttcattgta   | gatatttatg  | cgtgcttttg |
| 10261 | atgggtccact | atttagctga  | gaaaatcaag  | tttttgtttt   | tctgcttttg  | agcgttgtaa |
| 10321 | gagattttac  | cgaaaatagc  | attcatgatg  | gggatgtaca   | catatgacct  | taccagaaa  |
| 10381 | aagtggagag  | aaagtttgga  | atgtttttta  | caaaaagaat   | gatgcatcaa  | attgttctgg |
| 10441 | aatgcaatag  | ttaatagtga  | cgttgtttgt  | tataaaaaat   | ttctatgtat  | tcaaatattg |
| 10501 | cagttctagt  | ttgttgagca  | gagtgttgtg  | aagtatcaat   | aagtatttct  | cttttcaatg |
| 10561 | agctaaagaa  | gctttccaca  | acagaattgt  | tgtaacaaca   | acctttatga  | ctcatctatg |
| 10621 | ttttttatgg  | ataagagata  | ttgataacct  | tgcgaaagtat  | attgtgaacc  | ttgatcacta |
| 10681 | tgtaatagta  | gatttttggc  | aggtttacgc  | ttgttaacgt   | ccattaataa  | agagtccata |
| 10741 | accaattggt  | tatttattga  | actgctcatt  | aactaccatg   | cgtgaatata  | gatcgattat |
| 10801 | tgttgccaaa  | tatagccatc  | cctccttggt  | cttgatgtaa   | gtaatcccat  | actttatttg |
| 10861 | gttgatcaac  | aataaagttt  | tgatctagta  | tattgggagc   | tacagctcta  | ttatctgttt |
| 10921 | gttgtttttt  | aatttttaaac | tttcttctca  | gtatagccct   | gatgtcattt  | ttctgcataa |
| 10981 | tactttgcac  | cgttttcaaa  | ttgcaacttt  | tacccaaagc   | cttcaattca  | gcatgaattt |
| 11041 | taggagctcc  | atatctacat  | ttagaagctt  | gatataattt   | ttgaatatct  | gctaataact |
| 11101 | ctttattttg  | tgattctcta  | ctgcttattt  | ttcttgatga   | ccacttatag  | tagccactag |
| 11161 | cagaaaaccc  | tacataattc  | ctgcacttta  | tagtgtttac   | tatgctcttt  | tatgaaaaaa |
| 11221 | tatttttactc | tttttgactg  | gccagggtt   | tttttaaaat   | gtctctttct  | cttgttactt |
| 11281 | ttgctaactc  | tttctgtaaa  | tcaaactctc  | ctttgtcata   | agggtgctaca | tctggaaatg |
| 11341 | catttgccgc  | tgactttttt  | tcgttatatt  | tcttcatcca   | ttttcctaata | acactatccc |
| 11401 | ttattcctag  | atctcttgct  | acttttgcaa  | ctggttgacc   | tacctttctt  | tgttcatttg |
| 11461 | ccagcttaac  | agcttccaat  | ttgaattctg  | ccgtatatct   | tcttgccatt  | tctaactctc |
| 11521 | caaaatttta  | ttttacccga  | aaaaactcct  | ttctttctct   | ccactttttc  | tgggtgaagg |
| 11581 | cactatttgt  | taagtaattt  | acacttcaga  | gtttatctgc   | tttaaagtgt  | actctattct |
| 11641 | gtttcagcat  | ttgtcataaa  | tccttaatta  | tttctgactt   | tttagttcag  | tttttaacca |
| 11701 | ttcttttcct  | aacttaatgg  | cagtgacaat  | aagcctatct   | atcattctga  | tgtgatttca |
| 11761 | gttttgttta  | cgtgcaaaact | ctctaattcc  | accttgtagt   | taggataaat  | tagagagaca |
| 11821 | ttaagatctt  | ttttaatttt  | aacattactt  | actctctttg   | atcctaaata  | aaaactctgt |
| 11881 | gcataatctg  | gtaactcaat  | tggttctgga  | gggctaacat   | tgagaagtgt  | gggtgcatat |
| 11941 | attaccactt  | cagattgtgt  | agtgggtaaa  | tcgtctgcac   | aattgtatat  | ttcaccaggt |
| 12001 | tttatgtttt  | gcatggaaga  | aaataaaaata | tttgatatat   | cttcaacgtg  | aatacgagaa |
| 12061 | aaaaaatgcc  | cttctttttt  | cacatttctt  | gctttgccaa   | gctgcaagtc  | aattaacacg |
| 12121 | ttcttactag  | ggccgtatat  | tccagctaaa  | cgaaaaaatat  | gtacaggcaa  | tctgctattc |
| 12181 | agccacttcc  | tttcagattt  | aaggcgcttt  | tctcctctga   | tttctatagg  | ttttgtttca |
| 12241 | gattcctcat  | tcacccaatt  | accagagtga  | tcaccataga   | cgctagttgc  | agacaaataa |
| 12301 | ccaagccatt  | ttacattttg  | caggcaatca  | ccgtatctct   | ccacaacatc  | atcgccatct |
| 12361 | ggaggaatag  | aaattaaaac  | gtgcgttgcg  | cttttaagca   | gatcttgact  | aactttctca |
| 12421 | taattaaaga  | ggattacatc  | ttgtatatatt | ttacttcttg   | atgtgccact  | aactttccaa |
| 12481 | cctaagttca  | gtagtttttt  | cgataaaaaat | ttagctacat   | atccataacc  | aaagcaaaac |

|       |              |             |             |             |             |             |
|-------|--------------|-------------|-------------|-------------|-------------|-------------|
| 12541 | aagtgcacatga | aaattaatttt | ttaaaatttct | tcttgataaaa | ttctactcct  | aatttttattc |
| 12601 | cctcttcatt   | aataatatgc  | cctaataatgc | gaattgggtg  | tccttcaaca  | tttactccat  |
| 12661 | tttctttcag   | agctttaacc  | gctaagtcga  | gggacgaaaa  | aggtaccacg  | tcgtcagcat  |
| 12721 | caccatggat   | aacacatatg  | ttaggttttg  | acttgatctc  | tgggtgcagtt | tttgaagggtg |
| 12781 | aaagaaatct   | accagagtat  | gcaacaactg  | atgcacagga  | ttgagagcgg  | gtgagagctg  |
| 12841 | tatgtattgc   | aagcattgct  | ccttgagaaa  | atccaactaa  | agaaagttgc  | gtatctttta  |
| 12901 | aattaagctc   | ctttaatttt  | gtatcaatga  | aatgatattac | aattgatgta  | gcattttttta |
| 12961 | ctccattata   | tagcgcttcc  | tcactacgat  | cttccaagct  | gaaccactga  | taaccatcac  |
| 13021 | ctattttctc   | ttcaaacgga  | gcattgggta  | ctgcaaaaata | tgaacccagt  | aaaaacttgc  |
| 13081 | tcataacttt   | agcaagggtga | atgaaattat  | cgccacttga  | gccccaacca  | tgtaaaaaaa  |
| 13141 | taatcaaatt   | tttcttattt  | ccgcctgcac  | aaattttctgg | gcctttaagt  | tcaatcattt  |
| 13201 | cttttctttt   | tgcgtttata  | tttttattta  | acactaattt  | tcaaatttgt  | aaaaccaatg  |
| 13261 | tgcaattacg   | ttcccgatac  | tacagataaa  | gtaacttagg  | ttcatcgacg  | atttgaaaaa  |
| 13321 | ccgtcattcc   | gctactcggt  | agcggctgag  | ataccgcgaa  | tgaatcgcg   | tatgacgtag  |
| 13381 | ggaaaacctt   | agctataaac  | ctcagaaaata | agaaaacaaa  | ctagaaaaaa  | tacctcacta  |
| 13441 | taactgcagc   | cttaagcaac  | gtaccttatt  | tatttacgaa  | aactgggtata | aatgctatgc  |
| 13501 | aagtagctac   | actacttgca  | tggcatcaat  | aattgacctc  | gacttaccgt  | ccaactagaa  |
| 13561 | agttgtatat   | agaatgacag  | aaatccagat  | gttattttatt | tactttcgat  | cttttctatc  |
| 13621 | aatttttttaa  | ctaagcctct  | tagctttttta | ctggattcat  | caagctcttg  | aatctgcgag  |
| 13681 | ctatgctctt   | tcattagttc  | cttatagtta  | cctcttatgt  | agtcaatcat  | ttccttcac   |
| 13741 | tgagcaatca   | tcttggttaac | atccatactg  | cccaaatacag | gtatcatgcc  | aggcatagcc  |
| 13801 | ccttctaaca   | taccgccagc  | cataagctgc  | tgagacattt  | gcataaatgg  | ttttaaaagtc |
| 13861 | tgattaagca   | attcaggatc  | cttggtcaat  | ttttctattt  | gctctttgca  | agtatccata  |
| 13921 | tactgcttca   | taaattcatc  | ttcttgccct  | ttgtctatca  | taattataac  | ctacctaata  |
| 13981 | atacgtgttc   | tttattatat  | attatttttaa | aattaaaaaac | aatacaaaat  | acctgtcaca  |
| 14041 | attgcattaa   | tacttttttaa | ataataaaaa  | atgctccttt  | gcttataaag  | ggtcacatac  |
| 14101 | cttcttttaac  | cattccttat  | cttttacgct  | attttctaag  | tttttataga  | caaattgatg  |
| 14161 | gtagccattt   | atccattcaa  | tttcatcctt  | agtaagcatt  | tgcacattta  | ttagtcttct  |
| 14221 | atcatatgga   | atagaggtca  | gttggttttaa | gtttaagaag  | ccattctctt  | gcctgtcaac  |
| 14281 | atatatcaga   | ttttcaattc  | ttattccata  | ctctcccggga | atgtaatage  | cagggtcgtt  |
| 14341 | ggaaagtatc   | atccctggcg  | tgagtttcac  | tttattactt  | tttgatattg  | cttggtgtcc  |
| 14401 | ttcgtgtact   | gataggtaac  | ttcctactcc  | atgccctgta  | ccatgcatat  | agtccattcc  |
| 14461 | aaattttccat  | aatgcggtac  | gtgccaatat  | atccaattct  | ccaccagtag  | tgccgggggg  |
| 14521 | aaagatgaca   | cttgctatag  | caatgtgagc  | tttcaacact  | attgtatagt  | ggattatttg  |
| 14581 | ctcattgggtc  | ggattaccaa  | ctactacagt  | tcttgtcaca  | tcagttgtgc  | cactaaggta  |
| 14641 | ttggccacca   | gagtcaatca  | aatatagtcc  | atttttctga  | attaccttat  | tcgtcttact  |
| 14701 | gcttgcacga   | tagtgaatta  | ttgcaccatt  | ttcattaaat  | gcggaaattg  | ttggaaagct  |
| 14761 | caattgttta   | aacaaattct  | gctcttttct  | gtattctaaa  | atcttttctt  | cagcttcaag  |
| 14821 | ttctgtacca   | acattattttt | caagccaaga  | tagaaaaattt | gtaactgcca  | ctccatctct  |
| 14881 | gatatgcgca   | tttatagccc  | cagctattttc | agtttggttt  | tttgctgctt  | tataaattag  |
| 14941 | acaaggatct   | tctctctcag  | ctacctgttt  | atctttttatt | acagccatga  | tactcattgg  |
| 15001 | agttgtgctt   | ggatccatga  | ctattgaatt  | tagcttgtgc  | agcgaatttt  | ctagctcact  |
| 15061 | aatatcaaaa   | atattttatat | gattgcctaa  | atttgcttct  | atagttgaat  | gttctttatc  |
| 15121 | ttgaataaac   | aaattaacat  | taccgctttt  | atacaatata  | gcacggccca  | atatacatgg  |
| 15181 | agtataattta  | gcatttttcat | ttcttaaaat  | taataaccat  | gaaattgaat  | ttggatcagt  |
| 15241 | taaaagcact   | gcttcagctt  | ctttatctat  | gcttttggca  | actttttcac  | atttgtcctt  |
| 15301 | actactttca   | ccagcatgtt  | caatagaatg  | taaaaccact  | gcttgttttc  | gatagtcact  |
| 15361 | ttttttttcca  | gctaaacag   | gtattaattt  | acagatatct  | tcatactttc  | ttatatcttc  |
| 15421 | tatggtaaaa   | tattgcaaat  | aataacctag  | tgaggcagtc  | gatgttaagt  | ttgcttttat  |
| 15481 | ccattcgctg   | ggatcctctt  | cttgatatatt | atatacttga  | aaattgccc   | gatcgagctg  |
| 15541 | attgtgagct   | tgtgtgatat  | agcgtccatc  | cgtaaaaaaat | gggcacttgt  | tgttttttgt  |
| 15601 | aacaatgagc   | agcccatttg  | ttcctgtgaa  | gccacacagc  | tttgtttagct | cctctgaata  |
| 15661 | ctcattttaa   | tattcatctt  | tgggtgtgca  | cataaacgcc  | tcagcattta  | ttgcacgcac  |
| 15721 | aaaagaacga   | aattcttcga  | tttttgacat  | agaacacctc  | acacaaaaat  | agcagccact  |
| 15781 | ttcgtttttc   | tgtttctcaa  | atacactaat  | atgctcacta  | tcgctgcagg  | agtgatgcct  |
| 15841 | tgtatttgct   | ttgcaatgcc  | aatcgctcgt  | ggtttttatcg | tctgcaactt  | ttctattact  |
| 15901 | tcacttgaca   | ggccttttaac | ttgtgaatag  | ttaaaatcaa  | ttggaatttg  | agtgttaatt  |
| 15961 | tcctctcgta   | aaaacttcat  | atccgcttct  | tgtcttatta  | gataagggtt  | gtattttgct  |
| 16021 | tcaatttcaa   | ccgcttcgca  | tatttcatct  | ttagttatgc  | taccatttgc  | ggtgccatcc  |
| 16081 | cagcgcgtga   | tgtctgttaa  | ctccggccat  | atttcttgta  | atttattcca  | gtcgatgttt  |

|       |             |             |             |             |             |             |
|-------|-------------|-------------|-------------|-------------|-------------|-------------|
| 16141 | ggatagctaa  | gtaaatctag  | tgccgttttt  | cttatcccat  | cataagatat  | tttgatacca  |
| 16201 | taagacctaa  | gctgctcagg  | agtaatcgtc  | agactcccta  | acttctcttc  | aagctgctta  |
| 16261 | atggattcaa  | gtttattctg  | taaaacagag  | tatctctcat  | gcgaaacaag  | ggaaatatca  |
| 16321 | taaccttttt  | gtgttaatct  | tctatctgca  | ttgtctgacc  | tgatagctag  | cctatatctt  |
| 16381 | gcacgtgagg  | taaataatct  | ataagggttcg | atcacccctt  | tggtgactag  | atcatctatc  |
| 16441 | attacgccga  | tatatgagtc  | tgtgcgatga  | agaacaaagc  | tttctttttt  | tcagatgcag  |
| 16501 | agagtgtctg  | attaattccg  | gcaataattc  | cttgccctgc  | tgcttcttca  | tatccagtag  |
| 16561 | tgccattaat  | ttggccagca  | aaatataggc  | ctttaatttt  | cttagtttca  | agagtatggc  |
| 16621 | ttagttctcg  | tggatcaata  | tagtcatact  | caactgcata  | tccaggtctt  | agtatttctg  |
| 16681 | cattttcaag  | tcccttgata  | ctctttatca  | tttcacactg  | cacttcaata  | ggcaatgaat  |
| 16741 | ttgaaattcc  | gttcgggtat  | atagtatcat  | cattcaggcc  | ttctggctct  | agaaatattt  |
| 16801 | gatgactact  | tttttctgca  | aattttttta  | ctttaacttc  | aattgatggg  | cagtatcttg  |
| 16861 | gtgcaacaac  | gtcatctaaa  | tatgaagaag  | ctgacctgtg  | gagattttct  | ctgattattt  |
| 16921 | tatgctgtgt  | ttcattagta  | tgggtaataa  | agcatgatac  | ctgaggttgg  | ttaatTTTTT  |
| 16981 | ctgttaagta  | agaaaacggc  | acagggtggg  | tatcacccac  | ttgttcttgc  | aatattgacc  |
| 17041 | agtttatagt  | gccacgatcg  | agccttgggtg | gagttccggt  | acgcagtcta  | cctaatttga  |
| 17101 | aattatattt  | cttcaacgta  | tttgcaagtt  | ctacggcaga  | cttatctccc  | attctccctg  |
| 17161 | aaggagtgtg  | ttgctctcct  | atatgaatca  | caccttgca   | gaaagtccct  | gtagttaaaa  |
| 17221 | cgactttgct  | tgtcagtata  | tgctccctcg  | agcttggtat  | tacagcttta  | atgcacaatt  |
| 17281 | ctccattggt  | attactctct  | ataagaaaat  | cgtcaaccga  | ctcttctttt  | accgtcaa    |
| 17341 | tattataatt  | tagaataatt  | tcctgtattg  | cttgcttgta  | taattttcgg  | tctgcctgta  |
| 17401 | cacgcggggc  | ccatactgct  | gcacctctgc  | tgctatttaa  | aatgactgag  | tgtatacttg  |
| 17461 | cttgatcgat  | tgctcttccc  | attattccat  | caagagcgtc  | aacttccctg  | actacaacac  |
| 17521 | cctttgcaac  | tcctccgatt  | gctggattgc  | aggacatttc  | ccctatagtt  | gaaattttat  |
| 17581 | gagttataag  | cagcgtgttt  | gcaccaaggc  | gagctgcagc  | agcagcagct  | tcgcaccctg  |
| 17641 | catgaccacc  | acctactact  | actacatcat  | atztatgcat  | gccttcttga  | gtaattctta  |
| 17701 | ctctactaat  | attctaacta  | ttagcggtta  | atgtcaaatt  | ttacagtaat  | taactatttc  |
| 17761 | aatcatcagt  | ggccaatgta  | tagctaactc  | acgtcatacc  | gtcacggtat  | ctctagatcc  |
| 17821 | cgctaacaag  | cagcgggatg  | acggtttttc  | aaattatcgg  | gttttagtgg  | ggcgagcgac  |
| 17881 | caggatcgaa  | ctggcgacat  | tcagtaccac  | aaactgacgc  | tctaccaact  | gagctacgcc  |
| 17941 | cgccaagata  | taaaatttct  | aacataagag  | cgcaaatagt  | caattgatta  | tttaactctc  |
| 18001 | tttttgacaga | gggtttttaag | tttagccaat  | aaatatTTTt  | attgatactt  | ttaccattat  |
| 18061 | agttaatcgt  | attgacacta  | atgaagtagt  | ggtatgttta  | aaagtatttt  | cacatttagt  |
| 18121 | ttttttacgg  | ctattttcaag | gatctcaggg  | tttaataagg  | atgtattaat  | tgctacggtt  |
| 18181 | attggtgcga  | actctcttgc  | agacatatTT  | ttttcttctg  | ttcgcttttg  | caatctattt  |
| 18241 | cgagcatttt  | ttgcagaagg  | agcgttcact  | acctcattca  | taccgttata  | ttcgacagaa  |
| 18301 | tcatatgata  | ataaaaaggc  | atttaatttt  | gcaagtagtg  | taatattccat | tacgtttatt  |
| 18361 | atcttagtaa  | ttttttgcct  | tattatgcaa  | actttctccc  | cttatatgat  | tcaaattttt  |
| 18421 | gctcctggat  | ttgaccaaag  | taagttttacc | cttactgtta  | ctttatcaag  | aattatgatg  |
| 18481 | ccctacataa  | tctttgtttc  | aattgcatca  | cttattgggtg | gaatgctgca  | agtaaagcag  |
| 18541 | catttttgctt | caacagctat  | tgcaccaatt  | gttttgaatc  | tctgtttaat  | catcagttta  |
| 18601 | tttgtgcctt  | acgtaaaaac  | tccagcgcac  | aacctttcta  | tagctgtgct  | gataggagga  |
| 18661 | gtttttcaat  | tgttgtctgat | gctattttagt | gcatacaagt  | taaaggcagc  | tttttctttt  |
| 18721 | agccttgaat  | taagcaatga  | agtaagggtt  | tttttttaagc | gtgtggtacc  | tgcaattatc  |
| 18781 | aacaattgtg  | taactcaa    | aagcttatgg  | attgatacaa  | tcatggcgag  | ttttatacca  |
| 18841 | aatgcggtgt  | cctatatata  | ttatgccgat  | agactaaatc  | aactaccgca  | gggaataatc  |
| 18901 | ggtactgcaa  | ttggtacagt  | gcttcttcc   | ttaatTTTcaa | aacagggtga  | taatactgaa  |
| 18961 | aatatagtca  | aaatacagaa  | caaggctctc  | aacataggat  | taatgttaat  | tatgccaca   |
| 19021 | actgctgcct  | ttatcattat  | tcccgcacata | atTTTtactta | cgcttttttt  | ttacggccgg  |
| 19081 | tttgatcatt  | atgcagtgc   | gcaaactggt  | cccacttttaa | tagcattttt  | tctttcttta  |
| 19141 | cctgcattta  | ttataaaata  | agtattgcta  | cctacatttt  | ttgctaaagg  | caatctgaaa  |
| 19201 | ataccaacca  | tattttcgct  | aatgtgtctt  | ggaattaatg  | tagtgctaaa  | ccttttggtta |
| 19261 | atgaacgagt  | atcagcatat  | ggggattgct  | attgctactt  | ccgtttccac  | ttggataaac  |
| 19321 | tctattctat  | taattagtta  | tttaacaata  | aataaaatgt  | ataaggttag  | ccaagcgtaa  |
| 19381 | ttgttaaagt  | tcatgaaaat  | ttttgtagca  | acggcagtc   | tgtcaatagc  | cctttatatt  |
| 19441 | tttaattctt  | tgttggcagg  | attatttttt  | gataaaatgt  | tggtctgtat  | tgtttattta  |
| 19501 | acgactttta  | tagctttgag  | tgttattggt  | tattttggta  | ttctctattt  | aatatttaag  |
| 19561 | ggaaacttta  | agcatgtgta  | aattatgaga  | ctttctttat  | atgctatatt  | atcaatctca  |
| 19621 | ctgctattaa  | ttctcatgca  | tgttgctgca  | actTTTtaagg | attggagtgg  | ctacaggaaa  |
| 19681 | tatatcataa  | aagagttaga  | gaagacgtat  | gatgctaaag  | tgcatattgg  | gggaaaaatt  |

|       |              |              |              |             |              |             |
|-------|--------------|--------------|--------------|-------------|--------------|-------------|
| 19741 | aaagtttcgt   | tgattacccc   | aaagctcact   | at ttataatg | tatacgtaca   | atacaacgaa  |
| 19801 | aataaagagc   | aaaagttgtc   | agattttaatt  | agtgtaaagaa | aaattgaaat   | aaggccatcg  |
| 19861 | ttcctatcgt   | tg ttttttatt | ttcgttgcaa   | ccaaagtcaa  | tcacattggt   | tggcatgaaa  |
| 19921 | agcaacaaag   | aaaat ttact  | taatattata   | aatacaaaacg | ccagtgggtaa  | cacagtcgat  |
| 19981 | atagtaataa   | aagacagcca   | agtaagtttc   | agaatgatt   | tcgctgatat   | tg ttaacata |
| 20041 | aaggaagttg   | ctgtaaaaaa   | aaataagcag   | tttttttggt  | aagtaaagggt  | agggtgataat |
| 20101 | aattacgatt   | tttcaggaaa   | ggttaatatc   | acaaaaagga  | atgtacacat   | tagtggtgaa  |
| 20161 | tcaaattttg   | taaatttgct   | at ttacaggt  | aatagaaatc  | aagaagaact   | ccagggtaat  |
| 20221 | ttaacattaa   | caattaataa   | cagttccggt   | tctgtgagtg  | at tttagcaa  | aatcattaat  |
| 20281 | cttagctttc   | tctcttggtg   | tattcctagc   | gaaaaatatc  | agatatcatc   | caatataagt  |
| 20341 | cttaatgaaa   | gtgagtttac   | ggcaactgac   | ttaaaaattg  | attccaaaag   | catgcaagcc  |
| 20401 | agcggtagaa   | tacaaaatga   | tagaaaaggc   | aatcacacta  | at ttcaatat  | tagcttcagt  |
| 20461 | aaagttgatt   | tagattccat   | acaaaatgat   | tcacaaagaa  | caatgaatat   | gaaggatctt  |
| 20521 | ctggaatggt   | ttagagcagt   | tgtgccaaag   | aacttgagct  | taaattttta   | tatggaagct  |
| 20581 | tctaacattc   | aatatcaaaa   | caaaatattg   | gacaatttcc  | gtgctgtact   | aaaatccact  |
| 20641 | gatggcaaag   | taaaagttaa   | tacgcttctt   | aaattttcctg | gaatcaataa   | tatatcttac  |
| 20701 | ttatcaggag   | agatctcaaa   | caataatgtc   | ctatctgaat  | tcaacgggtga  | tttattagtc  |
| 20761 | gaaggaaatg   | at ttgtgagtc | at tcattttca | tg ttttttcc | cttctataaa   | gatgaaagaa  |
| 20821 | aaccagaaaa   | atcaattttac  | actaagttct   | aaactgcacc  | ttgcaccaag   | aatattatct  |
| 20881 | atctcagaca   | ttagactgct   | aaataataag   | gaatccttgc  | aaggggtcaat  | tagagtaagc  |
| 20941 | catacaaaaa   | aacacaatgt   | ggtcaatggt   | gaatttagca  | tgcataatct   | tgatgcagat  |
| 21001 | aaatatgatc   | at tcattatt  | tagcagttta   | cctaaaatgc  | aatggctgaa   | aaattttcag  |
| 21061 | tatgatgcaa   | atataaaggc   | ccgtgttaat   | aaccttacat  | tgaatgatac   | gaaaattaaa  |
| 21121 | aatttggtgatt | ttttgctgaa   | aatggaaaaa   | ggtaagctag  | ttgcagataa   | aataaaacta  |
| 21181 | tctggagaag   | at ttcgatat  | taccggtaat   | gcaaaaatat  | tagcagatca   | aaaatacgcc  |
| 21241 | aaacctttat   | tagatgttaa   | ccttacgggc   | agtaaattta  | atggaaatat   | ctttaaatta  |
| 21301 | ccgaattttag  | tagagacgaa   | aagaaattca   | agaaatgaga  | tagatcaaat   | tcaatggtca  |
| 21361 | acaaagcagc   | ttgatttttt   | ggatgataaa   | gaaggctttg  | atgcaaatgt   | gcaaataaat  |
| 21421 | actgcagaat   | ttaaaaccga   | gcagaatggt   | ttaaaagatt  | ttaat ttgga  | tgcggtaatg  |
| 21481 | agaaacaaca   | ctatcactat   | caggcaggca   | agttacgtat  | tagaacacgg   | gcaagtgttt  |
| 21541 | tttcagggtt   | at tttaagatc | agactcaata   | aatacaagggt | tttctattgt   | aaatttggtg  |
| 21601 | actaaaaaga   | ttggtaagggt  | tataggaatt   | gacaatgtaa  | atgggtcagggt | aagcttaaat  |
| 21661 | ggtgaaatca   | aaactcaagg   | aaaaagtttt   | catgattggg  | ctagtaactt   | atcaggagat  |
| 21721 | gtaaactttac  | aagcgcaagg   | aatagaaggt   | actaatgtag  | at ttcaattc  | at ttatcact |
| 21781 | aatttggttaa  | gcagtaagaa   | taaatctgaa   | at ttccacac | ttgcttatgt   | tgatatatat  |
| 21841 | aacggtaaaa   | catctttttga  | aaatatttagc  | ggaaaagcaa  | gtattaagag   | tgggtatatgt |
| 21901 | tcaactagtt   | tacaattcgg   | gattgatcaa   | gcatcagggt  | caatctcttc   | taatttaacc  |
| 21961 | ttatctaact   | tcgcttttagc  | ttctatatct   | agggttctttt | tcataaccacc  | aaattatagt  |
| 22021 | aatccaatct   | at atcgatat  | gcattttggat  | ggccctat tt | ggcgtcctaa   | gatgagtttt  |
| 22081 | gatgtagacc   | aaatcttcac   | cgctctgggt   | ggcaagaaaa  | at agttgatt  | tacttaggcg  |
| 22141 | tacggttttag  | gagacaatga   | actcatctga   | acgggtacaa  | acttaaccta   | actcatcacc  |
| 22201 | acctggcagt   | ggtggcaagc   | caa atgcttc  | tctctttttcg | ttgagcgtca   | tgaagcttgc  |
| 22261 | gttttctacg   | tattttccaca  | actttttgtct  | ctttttccatg | agaatctcta   | ttgcatcttt  |
| 22321 | gtcgtacgac   | aagcacagat   | cttcaccaa    | ttttggtggt  | agccaagaat   | tcagggtgaca |
| 22381 | gataatat tt  | tctagcggtg   | gtaaaaccgt   | ctgttcccaa  | gggacaagcg   | tgcttcgact  |
| 22441 | aaattgctat   | aagtgttatc   | acctggtatg   | ccaagcaact  | gcggcggaac   | gccaaaagcc  |
| 22501 | agggcaatat   | cacgagctga   | actgtgtttg   | gactcaataa  | aatccatata   | ccttggtgat  |
| 22561 | aagctcattt   | ctttccactc   | caagcctcct   | tcaagcaata  | tcggcctccc   | agcattgaca  |
| 22621 | ggacctgaat   | aatgatcatt   | tatctgtgct   | tttaagcggt  | ggtactgctc   | ttgacttaaa  |
| 22681 | cttccaccac   | ttccatcttt   | tgctgatttt   | acaactattg  | caccacttgg   | tcttgctccg  |
| 22741 | ttttgcaaca   | tcgcttgatt   | ccaagcacca   | gcctgattat  | gctgatctat   | actatatgca  |
| 22801 | gccgcctcaa   | ttggtgataa   | cccataccaa   | tcaattcaaag | ggttaaagggt  | ctttaggtgc  |
| 22861 | aacactgctg   | aacgtccggt   | tagttttatca  | acttttaaagt | cataactggt   | gttatttatg  |
| 22921 | gcataacgat   | agttataagg   | aacgttat tt  | ctccctggaa  | caattttcaac  | cctatcgggg  |
| 22981 | cgcagaagat   | aaagctctgt   | tggtgggttt   | ctattgttct  | gcgactcaac   | catcaatata  |
| 23041 | taagaattgc   | cg ttaactaa  | ccgataagtt   | acaatccctt  | caataaaattc  | cgattttgat  |
| 23101 | gtcattggat   | taggagaata   | aagtaatttc   | agtaatggat  | gggctttttag  | ttgcgatttt  |
| 23161 | ccctgttcag   | taagctggca   | gagagtaaga   | ggtaccgaag  | atgcagcact   | tgcaatcata  |
| 23221 | ttgattgctc   | gaaaggcaat   | aacatttttt   | atgtaacctt  | cctcagcaaa   | acttacataa  |
| 23281 | tcacgcttac   | tccaacttgg   | ctccatcatt   | agttgcaaag  | cagaatat tt  | agtaaatact  |

|       |             |             |             |             |             |             |
|-------|-------------|-------------|-------------|-------------|-------------|-------------|
| 23341 | gcgctttttt  | ttctttgaaa  | gatgttgaaa  | ttcatatgtg  | cctcctaaaa  | aattgaattt  |
| 23401 | gtggtagaat  | tatatcaatt  | ggtgtcacag  | gaaggatata  | ctaacgtacg  | aacattatgt  |
| 23461 | ttgagagcaa  | tctctacaca  | gtagttaaat  | ggcaggcaca  | ataaggggta  | gcaaaaagaa  |
| 23521 | tgagcttttt  | ttttgagctg  | agcgaagcca  | cctaaggtag  | aaaatgaatc  | aggaaggagt  |
| 23581 | aaaaatatat  | ttaatatatta | tatgatgtac  | ttacttataa  | atatcttttc  | tgtgtcctat  |
| 23641 | ctctgtgata  | accacttcat  | attttataat  | atttacggaa  | tagataacgc  | gataatcacc  |
| 23701 | tacccttaat  | cttctttgtc  | ctttaaatct  | gtaataataa  | ggctcaccaa  | ggttaatggg  |
| 23761 | atcaactgta  | aggcgcttat  | ttatcgcatt  | tatgatcctt  | aatctttattg | tttttggaag  |
| 23821 | agctggaagg  | tctttctcaa  | gaacgctttc  | tatgaagata  | atattgtatt  | ccagtctaca  |
| 23881 | tcctcacttc  | taattttctt  | cacacctgaa  | acattacgtc  | tagcagcacg  | ctcaattagt  |
| 23941 | attttatctt  | cctcattttc  | aattgcttct  | tgtatttagct | tctctgctag  | ttctttaatg  |
| 24001 | gacttatttc  | ttatttttagc | cagtccagca  | agacactctg  | aaatttcggt  | gttgaaagtt  |
| 24061 | atgctaaatt  | ttgagtttgc  | catatatttt  | acctaaaatc  | tactaataat  | tataacaacat |
| 24121 | ttttctgaat  | ttttcaataa  | aaaaagttgc  | ctatacgtaa  | agaggacctg  | tgttgacaaa  |
| 24181 | taattaaaca  | tttgtcatgt  | actatgtttg  | ttaaggagaa  | atagcacaga  | agtgagtatt  |
| 24241 | aagtatatta  | ggaataagaa  | aggctgcgcc  | cagtgtcaca  | cactggaata  | acaggaaaaa  |
| 24301 | acgaactgct  | atactaaaaa  | aaaagaaata  | gaatatgaca  | gaatggctaa  | tatctaataca |
| 24361 | gcttattgat  | tataactgtg  | ctgtaaaatc  | catggaagag  | aaaattcaac  | aaattcacaa  |
| 24421 | taattcagca  | gacgaattgg  | tatggctact  | ccagcaccct  | ccactttata  | ctgcaggaat  |
| 24481 | cagtgcacaa  | gctgatgata  | ttgttgaaaa  | actatttccc  | atatataaaa  | caggaagggg  |
| 24541 | tggtaaacac  | acatatcatg  | gtccaggaca  | gcgcattata  | tatttaatgt  | taaaccttaa  |
| 24601 | aaaaagaaac  | aaatgcgata  | taaagctata  | tattagagat  | ctaagtaagt  | ggatcataaa  |
| 24661 | tgttttaaag  | caatttaata  | tacttgagaa  | gtttagagaa  | gatagaatag  | gtatttgggg  |
| 24721 | aaaccataac  | ggagtagaaa  | aaaaaattgc  | agcttttggt  | atccgtttta  | gaaaatgggt  |
| 24781 | aacttatcat  | ggcatagcgc  | ttaacgtctt  | tccagacctc  | tctcattata  | agggatttat  |
| 24841 | tccttgtgga  | ctgcaagatt  | atggcgtcac  | gtcaatggaa  | gaactaggag  | tgaaagttcc  |
| 24901 | actctctgaa  | ttggatgata  | tactaaaaaa  | agagttttat  | aagatatttt  | aatgattggt  |
| 24961 | taccttttat  | atttcattct  | cactttatgt  | gctaacacag  | gtattcatgc  | aatcgaccaa  |
| 25021 | gttgatatta  | ttgctccttc  | ttcgaaggga  | aaagaatcag  | atctgactac  | tataaaagaa  |
| 25081 | tatgtagaag  | ctttggattt  | taatcccat   | atctcgagaa  | aaatatatag  | taatgataat  |
| 25141 | ccatttttatt | ccaactctga  | tgaattcaga  | gcaaatgatt  | tgattagtgc  | actaactaat  |
| 25201 | gacagtaaaa  | taatttggtg  | tatcagagga  | ggagaagggg  | cttctcgggt  | aattccctat  |
| 25261 | ctagaaaagt  | tacccaatga  | taaaaaagaa  | aggattgctc  | aaaacaaaaa  | atcctcatag  |
| 25321 | gctatagcga  | tataactgcc  | ttgcacacct  | atctacaagc  | taaatataat  | tggcaaactc  |
| 25381 | ttcacggcac  | catgttgga   | atgatagtaa  | ataactccat  | ttctgaaagc  | tctgttaaaa  |
| 25441 | aattgaaaga  | gttaattctt  | aacaagcagg  | attctatcag  | atctgataag  | ctaaagatga  |
| 25501 | taaataatgg  | cattagacta  | aaagatggca  | gattaaagtc  | taaaatcatc  | ggtggttaata |
| 25561 | tgacttttagt | tgaaaacagt  | ataggaactg  | tttggc aaat | aaatgcgaaa  | ggtaaaattc  |
| 25621 | tattttttaga | ggacataaga  | gtctacccat  | acgcaataga  | gcgcagttta  | gatcacctaa  |
| 25681 | aacaagctca  | catctttgat  | ggagtacatg  | cagtaatctt  | tggggatttc  | gttaactgct  |
| 25741 | ataacgataa  | ccttggtgaa  | gttgtaaaaag | aaaggtttgc  | aaaaagtgtt  | aactttcctg  |
| 25801 | tattttacaat | gaaaggggta  | ggccatggac  | atacaaatga  | tcctttacct  | tttaacactc  |
| 25861 | acgctattat  | tagcggtcaa  | gacgaaaaag  | aaggtttggt  | ttttatggac  | gtgcagaatt  |
| 25921 | tagctaattct | tatagctaac  | gcgagctcta  | cgctcatgccg | ccgcagtatc  | tcttagccgc  |
| 25981 | taacacgtac  | ttaaccgtca  | taccgcgatt  | cattcgcggt  | atctcatccg  | ctaacaagag  |
| 26041 | atcccgcata  | caagtagcgg  | gatgacgaat  | tgtttaaccg  | tcattccgcc  | gcagaccgtc  |
| 26101 | ataccgccgc  | ggtatctctt  | agccgcatac  | acatagcggg  | atgacgaagt  | tatcgtcatg  |
| 26161 | ccaccgcgaa  | cgtcatacc   | gccacgaact  | gtcataccac  | cacgaaccgt  | cataccgcga  |
| 26221 | ttcattcgcg  | gtatctctag  | atcccgcata  | cacgtagcgg  | gatgacgggt  | gttaggggtg  |
| 26281 | catgcaagta  | gctgactact  | tggatctggt  | aggcttaaat  | cacaatgccc  | gtaaagctgc  |
| 26341 | gaccctagag  | ctactatctc  | tcacccactg  | caaataattgc | acgggtactat | ccacttgatc  |
| 26401 | atcgtgtcga  | gttttcaggaa | acattaaaaa  | ctcataactca | aaatcgttca  | gccatactgc  |
| 26461 | ttggtgcggc  | agaaaaacct  | tgccagactc  | tataatcgga  | acaatttgat  | aaaatcgagt  |
| 26521 | gagtttgtca  | tcatgtggta  | ctatttcgat  | aattggtaaa  | tactgttttg  | tcttttagctc |
| 26581 | ttgcaccaat  | tgctgaccac  | ttgtttttgc  | ttcgattaaa  | attgcgtgcg  | gtgtccatct  |
| 26641 | tgcagctagt  | gacagaactt  | gctctttaag  | ctttggatac  | tcaagctttg  | cgcgatatac  |
| 26701 | atcgagtaaa  | tagaatttat  | tgcccacttt  | tgtccagggtg | gtgcagacgc  | taaagtgtgt  |
| 26761 | catgctgctt  | gttgaaactg  | cagtgtccca  | gctctgagtg  | acatatgaga  | gactatcaga  |
| 26821 | aaaattttcta | tagcgcttca  | gccactctcg  | tttaattata  | ccacttgaaa  | gtggcagagg  |
| 26881 | gttttggttga | tattgtgcag  | caaaagcgta  | acttccaagt  | tcaaccttta  | tcattctcaac |

|       |             |             |             |             |             |             |
|-------|-------------|-------------|-------------|-------------|-------------|-------------|
| 26941 | ttcttctttt  | cctccatcga  | ggggatatag  | caactgacct  | tcttctcttg  | agtataatat  |
| 27001 | tacgggtggg  | gtcattctag  | cacttgatgc  | tgtaatccag  | cttttgtact  | cattttagtg  |
| 27061 | tactcgggtg  | acaggaacaa  | gaaaaggagg  | cgctggcctt  | ttgattgaat  | agataatctc  |
| 27121 | cttattttca  | gatatcatcg  | gtaaacaagt  | atggttccat  | atgtttttcg  | gtttggagag  |
| 27181 | aagggtgtccc | ggtcaaactc  | tcctgatgta  | gcctatgcat  | cacaagaaca  | attactcctt  |
| 27241 | tttttctgtc  | gttgagcctg  | gttactagag  | tctgggtcaaa | ccaatttgta  | gcacgccttc  |
| 27301 | taaacgtttc  | actcaaagct  | tgggcgggac  | tcagtggatc  | atccacgatg  | atgaaatcac  |
| 27361 | caccttcacc  | tgtaaacgtc  | cctccaacgg  | acgttgcaat  | tctgtatcct  | ctctgcactg  |
| 27421 | tttgaaattt  | gtatttggtg  | ttctgatctt  | tggatagttc  | tacctctgga  | aacagctctc  |
| 27481 | tataccaact  | agactgcatt  | atgcattctg  | tatcgagcga  | gtgcttttcg  | ctaagcagcc  |
| 27541 | gagagtagct  | tgcaactatt  | attcttgacg  | ttggctgatt  | tcccagtatc  | catgcggggc  |
| 27601 | acgcaacact  | agcgacacag  | gacttcattg  | aacgcggagg  | catattgaat  | attattcgcc  |
| 27661 | tcattttgccc | aacatttgcc  | gcttcaagtc  | tgtctgctat  | gacttttata  | tactgataat  |
| 27721 | cattatactc  | acaccccgcc  | accaccgttt  | gaaagcacag  | ttcaatgaat  | tttagaaaagt |
| 27781 | tcattgatata | atggtgaaac  | caacgcgtga  | cgctgggatg  | acaaaaaaag  | gagcactgaa  |
| 27841 | ggctatagggt | gagacgtcgc  | ggtatctcta  | gatcccgcta  | acaagcagcg  | ggatgacgaa  |
| 27901 | ttacttaacc  | atcatctaca  | ccgtcatacc  | gcgattcatt  | cgcggtatct  | cagtcccgtc  |
| 27961 | aacaagtagc  | ggaatgacaa  | ctaaatccta  | ccgtcatacc  | accgcgggtc  | ctactaacac  |
| 28021 | atagatcccg  | ctaacaagca  | gcgggatgac  | gggtgtcggt  | tagctataaa  | tattaagaaa  |
| 28081 | tttaccaaat  | aaaaaaaagg  | caaaaagaagc | cccgtgggtg  | gctaattact  | tacattatac  |
| 28141 | tttcaagtat  | ggcggttttt  | tattctaaac  | gcttaataac  | cgcgatttag  | ctgcttttta  |
| 28201 | atgcaactaa  | ccttttagtca | taaatgttta  | agaaatttac  | taaacagaaa  | aaaaggcaaa  |
| 28261 | agaaacccta  | gggtagctag  | ttattcacta  | tccatttttt  | aagttggcgt  | tttttgatgt  |
| 28321 | tttaaagtgt  | ttataagcgc  | atttcagctt  | atattaggta  | aaaacctaga  | aattttataa  |
| 28381 | agacataaga  | tgacacatag  | gcaaaaaatt  | aaacatggga  | cgccagatac  | gtgagttttt  |
| 28441 | ttgtcatttta | atctgtacag  | agaaagataa  | ataaatagct  | tcagtttcat  | gataagggga  |
| 28501 | ctggcaaggc  | ttgtcaagca  | agttttttgc  | aatatcaggg  | gataatttcg  | accataaatc  |
| 28561 | cctatcaata  | aatttttaaca | aaaatacttc  | agtgcatttt  | caaataataa  | cattccatca  |
| 28621 | ccatatttttg | gcatagccac  | tcctaaacgt  | ttacattttt  | ctttttcaag  | aggccaatta  |
| 28681 | tcttgctgag  | taaaaaatat  | tcccctttct  | ggatggggca  | ttaaagccaa  | tactctccca  |
| 28741 | cttttatctg  | ataaagctgc  | cagatcgtat  | gtagatccgt  | ttggattgtg  | aggaaattgt  |
| 28801 | aggttagcgt  | agttgccatt  | ttcatcaatg  | taacgtaatg  | cggcggaatt  | gctctcaatc  |
| 28861 | aattggttca  | aagtatcttg  | atccataaaa  | aatttgcctt  | ccccatgagc  | aataggggaga |
| 28921 | tatagttcac  | tcaggccccg  | tagccaaaca  | gaattactct  | ttgaattaac  | tctcactcta  |
| 28981 | atccaacggc  | attgataaatt | gcctatatca  | ttatggatta  | aagctagatt  | agagaactct  |
| 29041 | ggaattaatt  | ttactaatat  | ctgacaacca  | ttacatatct  | ctataatcag  | cttgtcctga  |
| 29101 | gataaaaaact | cttgaaaactc | atccaacaag  | ttgttttttaa | tgcgtaaagc  | aaatgcatta  |
| 29161 | ccagcaccag  | tgatcatcacc | ataggaaaaa  | ccccctggaa  | ttgcaagtat  | attgcttaat  |
| 29221 | ttcagttcac  | ctggattatc  | tatgatatcg  | ttaatgtgaa  | cgattttttac | ttcaatatta  |
| 29281 | ccaataccaa  | gtttttctgct | gcattccata  | aatgcaaatg  | cagttttctt  | ttcgcaattt  |
| 29341 | aagccataac  | cagataggac  | tgtgattttt  | atgaattgct  | aaaaattaaa  | aaattcgaat  |
| 29401 | ttccttttta  | caaaatttgc  | tactaaattt  | aacgcaaata  | acaccaataa  | taaagctata  |
| 29461 | attgcgatag  | cagcaagttc  | aacaaatgca  | atttcaggat  | tgcttgacca  | tatgtatatt  |
| 29521 | tgacacaggta | gaacagttgc  | cggatcgaaa  | aaggacgtag  | gtgtatcagc  | aataaatgcc  |
| 29581 | accataccca  | tcataagtaa  | aggagaagat  | tcacctaaaa  | tccttgcaat  | tgcaagcaca  |
| 29641 | gtaccatgta  | ttattcttgg  | taacgcaatc  | ggtaaagagt  | gatctaatat  | caccttgatg  |
| 29701 | tgaggtgcac  | cgagcgcaaa  | cgctgcatct  | tttatcgtaa  | taggaacatt  | cgcaaaggca  |
| 29761 | ttttttgttg  | caattataat  | attaggtaac  | atcataaatg  | aaagagtcac  | tccaccaaca  |
| 29821 | agtgggtgaag | agcgtggtag  | cccaaatatg  | ccaagataga  | gagttaagcc  | cactacacca  |
| 29881 | aatattattg  | aaggcactgc  | agcaagatta  | tttatgctaa  | tttctacaat  | attagtcatt  |
| 29941 | agcctatttt  | taggcataaa  | ttcgtaaaga  | cagatgcccc  | acataattcc  | tattggtaat  |
| 30001 | gctaattgcta | ggcacactat  | aattgtcatt  | aatgaaccga  | taaacgctcc  | taaaatccct  |
| 30061 | gcattctcag  | gttcacgaga  | gtcagattta  | aggaataaag  | acttattaaa  | aaattttttc  |
| 30121 | actctcctct  | tttctttttg  | ccaatcaagt  | aatttagcat  | aacgatcatt  | caaatattta  |
| 30181 | tctttatttta | ttgaattaat  | tatacttgac  | gcggtaaacc  | agatctcata  | ttcaccacta  |
| 30241 | tcttttactt  | tcttacgaaa  | aaatttctct  | agttctttgt  | aagaattacg  | acttaaaatt  |
| 30301 | tcgtcaccgt  | ctttaaaaatc | agttcctcca  | aacaccttac  | gtaaagaatc  | gttgagtaag  |
| 30361 | ccaatggact  | tataccgcaa  | atcactagga  | ttactcgcca  | aagtaagatc  | agcatttatt  |
| 30421 | tcaactggca  | ataaaatttt  | cgttactgtt  | aaggcactgt  | aagagttaac  | taatatactc  |
| 30481 | aacaatatac  | acacaggaca  | gccaagttag  | ataactagtg  | ccgtgaaaga  | acaaaagcgt  |

|       |             |             |             |             |             |             |
|-------|-------------|-------------|-------------|-------------|-------------|-------------|
| 30541 | agcgctctgt  | tcttttttatt | tttcctttttt | atacgagcat  | gtacacgcct  | tgactgaagt  |
| 30601 | aattttaagga | atTTTTtctt  | tatactcatt  | tattttttcct | ggatcccac   | gtcaagccca  |
| 30661 | cagctgtaca  | aacgtccagt  | ttaataaccg  | ttgatgtcat  | tccctattgt  | atctacttag  |
| 30721 | atTTtctttt  | aacataagta  | gtacgttctt  | tgatccttgc  | agctttttcca | aatagtttgc  |
| 30781 | acagataata  | cagtttttgct | ctacgaacct  | ttcctttttct | tgtcacttgc  | actgaaacca  |
| 30841 | gtgcaggaga  | ataaacaana  | aactgagaca  | ctatactttc  | tccatggcta  | actttttctga |
| 30901 | ctgcaaaaga  | agaatgtaac  | ccgcgggttc  | tttttgatat  | acatacacct  | tcaaataatct |
| 30961 | gtatacgttc  | acttgtagcg  | tcaactactt  | taaaagtgc   | cttcaaatac  | tcgccaggac  |
| 31021 | gaaattctgg  | tattttcttta | gctaacactt  | gcatttgctg  | ttcgttaaat  | tttttaagta  |
| 31081 | aatttgtcat  | ttatctctcc  | actcaataat  | tcaggcctac  | gcttttttgt  | tataacatga  |
| 31141 | gactgcttct  | gcctccaatc  | acttattttt  | ttgtgattgc  | cagataacaa  | aacctcaggt  |
| 31201 | actttatatc  | ccttccactg  | ctcaggtcta  | gtatattgag  | gatattcaag  | tacaccacca  |
| 31261 | ccataattaa  | aactttcttc  | agtaatacta  | tcggtattat  | ttactacacc  | tggaagaagt  |
| 31321 | ctaattgcat  | catcaagaac  | caccattgca  | gctggctcac  | ctcctgaaag  | tataataatct |
| 31381 | ccaatactta  | actcataagg  | agtatacgca  | tcaattatcc  | tttgggtcaat | accttcaaat  |
| 31441 | cgaccacaca  | atattgttat  | atgaggaaac  | tctaataatt  | ctctggcaat  | attctgatta  |
| 31501 | aacttagttc  | cagatggagt  | catgtaaata  | aacttagtgt  | ttttatgaac  | agagagcata  |
| 31561 | ctatctactg  | catcaccaac  | tacatcagaa  | cgcataacca  | ttcctgctcc  | acctccatat  |
| 31621 | ggaacatcat  | ccacagttga  | atgtttatct  | ttcgcaaaag  | aacgaatatt  | tattacttca  |
| 31681 | aggttccata  | tttttttttc  | taacgctttt  | ccggcaagag  | aatagttcaa  | aaaccccggg  |
| 31741 | aacatttctg  | gaaatatggt  | taatattgta  | acattgaatg  | ccattaaggt  | ttatttttaag |
| 31801 | ttatttgggg  | ctatactcta  | agaacagtaa  | attgatataa  | tatatagtta  | aattaacat   |
| 31861 | gtcactgaat  | aaaacgatat  | acgaaggtaa  | agcgaaagcc  | attattgaaa  | ctgaagattc  |
| 31921 | atcaactgtc  | atacagcact  | ttaaagatga  | tgtcacagca  | ttcaataagg  | aaaaatatga  |
| 31981 | aattattgag  | ggcaaaggaa  | taattaataa  | tcatgttagt  | gcttttatca  | tggaaaagct  |
| 32041 | cgaagaagca  | ggaattagca  | cgcattttat  | aaaaactctg  | aatgaaagag  | aacagctagt  |
| 32101 | caaaaagctc  | aagataatac  | ctcttgaggt  | ggtagttaga  | aatggtgcag  | ctggcagctt  |
| 32161 | ttgcaaacgt  | tttaatatca  | aagaagggtga | gaggcttgca  | tctcctataa  | tcgagttttt  |
| 32221 | ttacaaaaat  | gatgacctag  | ccgacccaat  | ggtaaataga  | aatcacatac  | tgtattttga  |
| 32281 | ttggctatct  | agcaaagaaa  | tggatgaagt  | aaaaactaca  | actttaaaga  | tcaatgaaat  |
| 32341 | cctaactgat  | ttattctcaa  | atgcaggcat  | agatctagtt  | gaccttaaat  | tggaatttgg  |
| 32401 | cagattgata  | aatgacagta  | ctaaaatcat  | tttagccgat  | gaaatcagcc  | ctgataactg  |
| 32461 | caggttatgg  | gataaaaaata | cttataaaaa  | gctagataaa  | gacgtctttc  | gtttgaattt  |
| 32521 | aggagattta  | aaggaagcat  | acctagaagt  | tgcaaaaaga  | ctgtcagtaa  | agtttaggtta |
| 32581 | actaaatact  | actctatcaa  | gtggagggtt  | acatgcctca  | tcaagttttc  | caataatttc  |
| 32641 | aatttttttct | ccacgttttt  | ggaaatgatt  | tttcacgttt  | tgcataattct | cagaacttac  |
| 32701 | gatcaataacc | ataccaatac  | cacaattaaa  | tgttttttagc | atTTtctttct | tctctatttt  |
| 32761 | acctcctttt  | gttagccata  | aaaatatatc  | tgggccatttc | caggaattaa  | tgtctatggt  |
| 32821 | tgcaaaataag | tttttttgaa  | gaattcgcgg  | aatattgtct  | accaaaccac  | cacctgtgat  |
| 32881 | gtgcgcaata  | cctttttactt | gtgacatgat  | aggcagcaaa  | gaatcaacat  | atatttttgt  |
| 32941 | tggttcaagt  | agtattttcac | tccaagattt  | attattccat  | agagatgtat  | cgttataatt  |
| 33001 | tatacctaag  | cttttgaaaa  | catggcgcac  | taaagaaaac  | ccatttgagt  | gaattccact  |
| 33061 | tgactctaag  | ccaactatat  | aatcacctgc  | tttcatcata  | ctacagtttg  | gaagaatttg  |
| 33121 | ctttcgatca  | actacaccaa  | ccacaaaacc  | tgcaaggcca  | tagtgattat  | taccatacat  |
| 33181 | tccaggcatt  | tctgcagttt  | ccccaccaac  | caatgctatt  | ttagcttget  | tgcacccctc  |
| 33241 | tgcaatgccc  | ttaaaccacag | ataataaaaac | atcttttggtc | aaaacgectg  | ttgcaaagta  |
| 33301 | atcaaggaaa  | aacaaaggcg  | ttgctccttg  | tgcaagtaag  | tcattttacac | acattgcaac  |
| 33361 | taaatctata  | cctatagtat  | catgtttatt  | cacttcttga  | gctatcaaca  | gtttcgtacc  |
| 33421 | tactccatca  | gttgaggaaa  | cgagtactgg  | atgggtcatac | ttcttactta  | gtgcagcaaa  |
| 33481 | atcaaataac  | gcagaaaatg  | aacctatttc  | gctgattact  | tcttctctag  | tagtttcttg  |
| 33541 | agcaataggc  | ttgacttctt  | ttattaactt  | attatatagt  | tcaatatcta  | ttcctgatct  |
| 33601 | ggtataagta  | ttcataatcc  | ttttataaat  | tttaaaaattg | ttataactat  | attaatgcct  |
| 33661 | tgatataaaa  | agtgcacacga | aactttctct  | taattgacta  | ttatataact  | accaatatag  |
| 33721 | ggtaacttaa  | atcattttata | attatccaat  | gaacgaaaat  | acaaaaaaca  | tactgttaat  |
| 33781 | aacggaactg  | ctatcaggac  | ggctgcttca  | tgactttgct  | aactctatga  | atggaataac  |
| 33841 | gtttggcgta  | gaagagcttg  | aagtaataga  | taagaatgat  | gctgatgcgc  | agaaggaagc  |
| 33901 | gttgttgttt  | cttaaagaaa  | gctccgatga  | tttaatatat  | aaacataaag  | ttatgaagca  |
| 33961 | ggcatattct  | tcttcaatgg  | ataattatag  | ctttgataag  | accaaatact  | atatcgaaaa  |
| 34021 | ttattttatta | aaaaaaaaagt | aaagcttatg  | tggaaaaatag | acgcatactc  | tgcaaaaaat  |
| 34081 | aaggaagatt  | taattgaaaa  | gataaataag  | ataattttcta | atatggtgct  | aactatagcc  |

|       |             |             |             |             |             |             |
|-------|-------------|-------------|-------------|-------------|-------------|-------------|
| 34141 | agtgcagtg   | cggaagttga  | actagtatct  | gttttactga  | gtcaaacaga  | agataaaatg  |
| 34201 | ctattaacta  | taaaaattct  | aatgaacac   | aaaccaataa  | gcaaatcatt  | agtagacaaa  |
| 34261 | ttaatcaaaa  | aaaatgacac  | taatttaaat  | acaaaagata  | ttaatatcta  | tatgacctct  |
| 34321 | ttattattag  | agtactataa  | cactgaaatg  | cattatactt  | gcgaaaataa  | tttgctggaa  |
| 34381 | ataggtttta  | ctataacttg  | agttgcata   | ttggttatta  | caactttttc  | ttcgtgtcaa  |
| 34441 | ggcattcccc  | gacaaggggt  | accaaactta  | atttttgtaa  | tcacttaagt  | ctagtactat  |
| 34501 | tttattaatg  | tagcgctcat  | ttgcatcttt  | gatgataaac  | ttcataccat  | ttttatattt  |
| 34561 | aatgacttca  | tctacagaag  | gcactttacc  | agcaatcgaa  | agaatcaaac  | caccaagtgt  |
| 34621 | aacatagtct  | tcttcagggt  | cacgtaattc  | tatttttaga  | tcctcttcta  | tatcttttat  |
| 34681 | aagagccctt  | gctgatactt  | caaacttatt  | ttgagacaat  | tcagtaatgg  | tataattctga |
| 34741 | atttattttcg | ttttcactat  | caatgtttgg  | tattagttcc  | tctataagat  | cagtcattga  |
| 34801 | aattaaacca  | tcagttccac  | catattcatc  | caatacgata  | gctaagcatg  | athtagaga   |
| 34861 | gttcataccta | acaaaaagat  | tagttgtctt  | catcgagggt  | ggaacaaata  | ttacgctttg  |
| 34921 | tataatatgt  | ttcagattaa  | aatttttatc  | cctattaaaa  | ataacatctt  | ttacataaaa  |
| 34981 | aaagcctatt  | acgttatcaa  | agttatTTTT  | ataaattggt  | attttagtgt  | ggcaagtgtt  |
| 35041 | ttttatcttc  | tttattattt  | cacgctcgct  | tgactcaatg  | tctactgcgc  | atatctctgt  |
| 35101 | acgtggagtc  | attatatcca  | ttataccaca  | atcgcggaat  | tttaatagac  | cattaaatat  |
| 35161 | attaaggtct  | ggcagatctt  | tcattaatgc  | ctcagtcgca  | cactttttca  | acacagaagc  |
| 35221 | ttttttgaaa  | aggaagagaa  | aaattctata  | tgctattttt  | tctactaagg  | ttcttttttt  |
| 35281 | actcaattta  | ttccctgtaa  | tggcaaaaac  | gttttcagat  | tagattttatc | aagaaaactg  |
| 35341 | ttattaaatg  | tttaataagc  | atgtgaataa  | tgtcaaatta  | atttgtgaat  | tatttgttga  |
| 35401 | tataaaatac  | caacaattga  | tcaacaactt  | tttcaacaac  | atatacatag  | ttgtgtaaca  |
| 35461 | atgcatgatg  | gtaaagtatt  | ttccataaaa  | gaaaattact  | aacactctaa  | acaccttact  |
| 35521 | tatacacata  | aatcataaca  | gaaaatcaat  | aatatacgaa  | agttactcac  | atatttatcc  |
| 35581 | acaagttgaa  | caacgccaat  | ttttactgaa  | ttttaagtta  | gtaacaagtt  | attgatagaa  |
| 35641 | ctattattgt  | tgctatactt  | taatatacaa  | agaataaac   | agaatagatt  | ggaaagcggc  |
| 35701 | aaaacaacaa  | tagcgaaaat  | tattaagaga  | aatgagccgg  | gtggaagagt  | gcctatctgg  |
| 35761 | ctaattgcgtc | aggctggcag  | gtctcttcct  | gagtaccgca  | aagcagtaga  | aaatatgaat  |
| 35821 | aatttttatgg | agatatgcta  | caacacagat  | ttagtgcag   | aattgacgtt  | acagccggtg  |
| 35881 | acaagatttg  | acatggatgc  | ggcgataaatt | ttttcagaca  | ttttaataat  | agctgatgtt  |
| 35941 | ttgggttggtg | acgtgaattt  | cgtacgcggg  | gtaggtccaa  | taataaaaacc | cgtggaaagt  |
| 36001 | cctaaggaat  | tgaaggggtcc | acaagaaatt  | gaaactaaaa  | ccttaccaat  | tctaaacgct  |
| 36061 | ataaaaaaag  | tcagaagcca  | attaccaaaag | gaaaaatctc  | tcataggatt  | tgctggtgga  |
| 36121 | ccatggacag  | tagcctcata  | catcatagaa  | ggtgggagca  | gcaaaaacttt | ttccaaagta  |
| 36181 | ttaaatTTTT  | atccttcgtg  | tttgaaggaa  | ataattgaac  | gaataacgga  | agtaacgatt  |
| 36241 | atztatctaa  | ttaaacagat  | agaatttgga  | gcagatgtta  | ttcagctatt  | tgacagtaat  |
| 36301 | gctggtgcgt  | tatcggaacc  | attgttttaa  | gaatatgtta  | tcgaaccaac  | aaagagaatt  |
| 36361 | atcttggcaa  | taaaggatag  | attttctgat  | tttccaataa  | taggtttttcc | aaggctctgct |
| 36421 | ggaaatcttt  | ataaagatta  | ctgcgaacaa  | acagggtgtat | ctgcagtaag  | tatagattat  |
| 36481 | aatgtttccaa | taaaatgggc  | gaaagcgaat  | ctaaacatcc  | ctctacaagg  | aaaccttgat  |
| 36541 | cctaactcttt | tagcctataa  | taaaacggaa  | gcaatcaaag  | aagcaaaaacg | tataatagat  |
| 36601 | tgcttttagag | atttaccctt  | catatTTaat  | ctcggacatg  | gagtactccc  | tgatactcca  |
| 36661 | gttgaaaata  | ttgctgcgtt  | ggtaaacctg  | gtaaaaagct  | actaatacaa  | tacacaaaat  |
| 36721 | tcctagcttt  | tttgttgtac  | ggggtttatc  | atTTaaattt  | agcttcagta  | aaatatgtca  |
| 36781 | gaccttgcaa  | aaagaatggt  | cctaataaaa  | ccatcaccta  | cgattgctgt  | aactgataag  |
| 36841 | gcaataaagt  | tgaaaaatga  | aggaaaaaag  | atctgtgttt  | tagctgcagg  | agaaccggat  |
| 36901 | tttgatactc  | cagatcatat  | aaaaaaagca  | gctattcaag  | caataagtga  | aggtaagact  |
| 36961 | aaatatactg  | ctgttgatgg  | aacgcgtgag  | ctgaaagaag  | caataattaa  | taagttaaga  |
| 37021 | aaggataata  | acctcgagta  | cacgcttaac  | caaactctgtg | ttggtacagg  | tgctaagcag  |
| 37081 | gtgttattca  | atTTgttcat  | ggcaacaatt  | aactctggag  | atgaagttat  | tattccagct  |
| 37141 | ccttattggg  | tttcatatgt  | tgatatggta  | agtctTTTTg  | gcggcttgcc  | agttgtagta  |
| 37201 | gaatgcaaac  | aaaatTTTTa  | actgacagcg  | gaattattga  | aaagcaggat  | aactaaaaaa  |
| 37261 | actaaatggt  | taattcttaa  | ctcaccgaac  | aacctgcag   | gagctgtgta  | cacatgtgat  |
| 37321 | gaattgaaag  | acatagcaca  | aatattgctt  | gaatatccac  | atatgaatgt  | cgttacagat  |
| 37381 | gatattttatg | agcatataat  | atacgacgaa  | aagTTTTtta  | ctatcgctca  | ggttgagccg  |
| 37441 | aagcttttatg | atagagtTTt  | tgtagtcaat  | ggagtatcaa  | aagcctatgc  | aatgacaggc  |
| 37501 | tggagaatag  | ggtatatTgc  | aggtagaagt  | gatgtggtaa  | aagctatctc  | tacgctgcag  |
| 37561 | tctcaaagca  | cttctaattcc | aaattcgata  | gcacaagcag  | cagcagcagc  | agcattaaac  |
| 37621 | ggtgatcata  | gtTTTTtgaa  | agaaagaaca  | aggatTTTTa  | agagtcgtag  | agatttttatg |
| 37681 | gtgaaagagc  | taaattctgt  | cccgggatta  | tcagcgtctg  | ttccacaagg  | tgcgTTTTat  |

|       |             |              |             |             |             |             |
|-------|-------------|--------------|-------------|-------------|-------------|-------------|
| 37741 | ttattttgtct | catgtgaagg   | attgctcagt  | aaaagcacia  | aaagtggtaa  | gataataaat  |
| 37801 | aatgatttag  | atcttactga   | atacttactg  | ggagatcatt  | tgggttgctgt | ggttccagga  |
| 37861 | attgcatttg  | gtctagaaaa   | ttttatcaga  | atttcttatg  | caacctctca  | ggaacaatta  |
| 37921 | gaaattggat  | gtgatagtat   | tactaaagcg  | tgccaggagt  | taaaatgaaa  | tagactatcc  |
| 37981 | attaattacc  | catttcaccg   | cgtcaaaaat  | attcactaag  | gttatcttga  | atgctcta    |
| 38041 | ttgtgttttt  | ctatggaagg   | cattttttatt | gattgagcaa  | gtgtctttct  | aataattgaat |
| 38101 | tcctcatttt  | tttcattttg   | ttgcagtaag  | ttaatgttat  | ttatttttatt | tactaaatct  |
| 38161 | ttcccccttt  | ccagagtctt   | taaatcactt  | tcgttaaatgt | gatgttcatt  | gtaaaaattct |
| 38221 | gcaacaattt  | cttttctttt   | cggataagta  | tttaaaaatt  | ccaacacctg  | atgttttagca |
| 38281 | acagcttgaa  | taaatttctt   | attaaatctt  | gaatcggtat  | atagatcttc  | taaattttca  |
| 38341 | tcgtagtggt  | ttgcttcatt   | tacagcaagc  | tttattatct  | cttctataacc | acttagaagt  |
| 38401 | ttcctataca  | atgtgtcgta   | tctattgcct  | agcacgtgtg  | tagcgaatgt  | ttgttcaatg  |
| 38461 | tattttgtta  | tgtaattttg   | cagcgtatta  | tctatcgtgc  | ttatattcat  | cagcctgctt  |
| 38521 | taatattata  | ttaactattt   | tacacataaa  | aagggttaata | ttgaattaat  | agaatacttc  |
| 38581 | tgaagtcaaa  | ttttactgaa   | aattatggta  | tttaagatat  | aattgtcagc  | atgaaataaa  |
| 38641 | aacataaata  | aaatggatct   | tgtaacaaaa  | gtgaagctca  | agataaagat  | gaataagggt  |
| 38701 | aaaatcataa  | atatacttat   | catttgtggt  | gtaatttttt  | ttatatacct  | tattcatgag  |
| 38761 | ccagttgtag  | atatggtaga   | aaaaattata  | agtaaaaata  | aagggtctctt | ttaaaaatag  |
| 38821 | aaaaagttaa  | ctttttccat   | catccaaact  | tgaacctgga  | aaatttagtt  | aatgcataaa  |
| 38881 | ctacttatgt  | tggctatgag   | ttcaactgta  | taaaattccg  | gtaaattaaa  | ataagtattc  |
| 38941 | ataaaaaatat | tgttttctat   | aaacagagta  | tctataatac  | tagctttggg  | gtaaagtatt  |
| 39001 | gcagaggaat  | tttttaaatct  | ggttgttggc  | gtcactgttt  | tatgcatacc  | aatatatatt  |
| 39061 | acgcgtaatt  | ccaaatatta   | taattcctga  | attggttagta | aggtttaata  | taggaacaac  |
| 39121 | agaaatagga  | caattttgtg   | gactgtatta  | tgtagggttat | gtgttagcac  | atattcctgt  |
| 39181 | aggtattctt  | ttagatagat   | ttgggttctaa | aattgttata  | ccgatttgta  | ttgcattaac  |
| 39241 | atcttttaggt | gctttacctt   | tagtcagttc  | taatgattgg  | agttattcta  | ttattggaag  |
| 39301 | aataattact  | ggtattggat   | cctctgcttc  | agtacttgga  | ctctttaaaa  | taataagtat  |
| 39361 | ttattaccgt  | agagaaaaat   | ttgccatgat  | gtttagtata  | tcagctatta  | ttggcatctc  |
| 39421 | aggtggtgta  | tttgccacta   | aaccgttaca  | tatcttattt  | aataagtttg  | ggtgggacta  |
| 39481 | tgtgtttggt  | acattttataa  | cactgggatt  | gttgcttgct  | cttgtttcct  | ttatgtttat  |
| 39541 | acccaaaatt  | gatacttcag   | aagaaagatt  | aaatatataa  | agtttaagtg  | aagttatatt  |
| 39601 | caataaaaaat | gttctatttaa  | taagtttatt  | tgggtggcttt | atggttggac  | cattggaagg  |
| 39661 | gtttacagat  | gtatggtctg   | caacattctt  | gcatgagatg  | tatgctatag  | atagacaggt  |
| 39721 | tgcatacaat  | atcttcaaaaat | ggatactgat  | aggctttggt  | tttggtatatt | tatcactttc  |
| 39781 | ttacttacta  | gaaaaaaaac   | caaccaaaca  | ctatgagata  | ataattttctt | gtgctatggc  |
| 39841 | tatgataaatt | gtgttttttat  | tacttttttat | atgtaacatt  | aattcacttt  | tagcatccat  |
| 39901 | attactatatt | atagttgggt   | ttgcttctgc  | gtaccaaaatt | gttttgactg  | ccaaagtgtg  |
| 39961 | aaatcttgtg  | aaggatgatg   | cggtagcaag  | tgcaggatct  | gtaagtaatg  | ctatagttat  |
| 40021 | gagttttggc  | tattttttttc  | ataccgttat  | tgcaaaatata | atgaattttt  | attgggatgg  |
| 40081 | taagatcggt  | gatgaaaaaac  | cgcttttatgg | agccgatgta  | atggttaaat  | ctatgttaat  |
| 40141 | aataacctata | tgtttactaa   | taggtatgat  | aggcttttgg  | ctacttaaag  | ttataagctg  |
| 40201 | taaaaagagc  | taagcagatt   | tagatgatta  | atatagtatt  | gtttttttata | actaaagtat  |
| 40261 | ctataatcct  | aaatttttagc  | tgagattcat  | gttgacagagg | aatttttttag | tctggctggt  |
| 40321 | ggcgtcactg  | ttttatgcat   | accaatatat  | attacgcgta  | attccaaaca  | taattgcgcc  |
| 40381 | tgaattgata  | acaaaattta   | acataagtat  | tacagatggt  | ggccagtttg  | gtgggttata  |
| 40441 | ctatgtaggc  | tatacgctgg   | ctcacatacc  | tattggtctt  | gctcttgaca  | aattcgggcc  |
| 40501 | aaaatttgtt  | ttgcctattt   | gtattatctt  | aacattttacc | ggaacattac  | cacttatatg  |
| 40561 | ctttgatgag  | tgggtattatt  | caatacttgg  | cagaatagtc  | gttggaattg  | ggtcatccgc  |
| 40621 | ttcagcaatt  | gggctttttta  | aagttgcaag  | catgtatttt  | gcgcaagaaa  | aatcagcaag  |
| 40681 | aatggccagc  | ttatctataa   | ttataggaat  | tttgggaggg  | atatgtggcg  | ggttaccttt  |
| 40741 | agacttctta  | ctcgataaat   | ttggctggaa  | ttatgttatc  | tatacattct  | cagcatttgg  |
| 40801 | gtgtttactt  | gctctgttgc   | tgttcttagt  | aacgcctgaa  | agcaatgctc  | aacaggaaaa  |
| 40861 | agtttagcatt | agagacttaa   | aaaacatact  | tttcaacaag  | catattattc  | taattagctt  |
| 40921 | ttttggtgga  | ctcatggtcg   | gtccaatgca  | aggttttgcc  | gatggttggg  | tgaaagcatt  |
| 40981 | cttttttgaa  | gtatataaaa   | tgaatgaaga  | cttggcatct  | tctctctctt  | ccgtaaatatt |
| 41041 | gataggaatg  | ttaataggat   | catttctcttt | ggcttattta  | ttggaaaaat  | ataaaaaataa |
| 41101 | gcattatgaa  | gttattattg   | tctgttctct  | tgcaatgatt  | gctagtttcc  | ttttactttt  |
| 41161 | tacacaggct  | ggcggattgt   | atattgtatt  | gcctgcactt  | cttggttatag | gtttcgcctt  |
| 41221 | tggatatcaa  | atagtaaacac  | tgtacaaagc  | attaagttat  | gtaaataata  | acttagtagg  |
| 41281 | cctgaaagcg  | ggaggataa    |             |             |             |             |

```

//
LOCUS      JAQZAU010000160          11891 bp    dna        linear    ENV 17-MAR-2023
DEFINITION MAG: Wolbachia pipientis isolate wEsol contig_6087, whole genome
            shotgun sequence.
ACCESSION  JAQZAU010000160  JAQZAU010000000
VERSION    JAQZAU010000160.1
DBLINK     BioProject: PRJNA929258
            BioSample: SAMN33142973
KEYWORDS   WGS; ENV; Metagenome Assembled Genome; MAG.
SOURCE     Wolbachia pipientis (insect metagenome)
  ORGANISM Wolbachia pipientis
            Bacteria; Pseudomonadota; Alphaproteobacteria; Rickettsiales;
            Anaplasmataceae; Wolbachieae; Wolbachia.
REFERENCE  1  (bases 1 to 11891)
  AUTHORS  Fiutek,N., Couger,B.M., Roy,S., de la Torre,J.R. and Connor,E.F.
  TITLE    Genomic assessment of the contribution of the Wolbachia
            endosymbiont of Eurosta solidaginis to gall-induction
  JOURNAL  International Journal Molecular Sciences
REFERENCE  2  (bases 1 to 11891)
  AUTHORS  Fiutek,N., Couger,B.M., Roy,S., de la Torre,J.R. and Connor,E.F.
  TITLE    Direct Submission
  JOURNAL  Submitted (10-FEB-2023) Biology, San Francisco State University,
            1600 Holloway Ave, San Francisco, CA 94132, USA
COMMENT    ##Genome-Assembly-Data-START##
            Assembly Date          :: JUN-2019
            Assembly Method        :: FLYE v. 06-2019
            Genome Representation   :: Full
            Expected Final Version :: Yes
            Genome Coverage        :: 100.0x
            Sequencing Technology  :: Illumina HiSeq; PacBio Sequel
            ##Genome-Assembly-Data-END##
FEATURES   Location/Qualifiers
    source  1..11891
            /organism="Wolbachia pipientis"
            /mol_type="genomic DNA"
            /submitter_seqid="contig_6087"
            /isolate="wEsol"
            /isolation_source="galls on Solidago altissima"
            /host="Eurosta solidaginis MN-2018-EFC"
            /db_xref="taxon:955"
            /environmental_sample
            /country="USA: Cowling Arboretum, Carleton College,
            Northfield, MN"
            /lat_lon="44.48 N 93.13 W"
            /altitude="280 m"
            /collection_date="2018-11"
            /metagenome_source="insect metagenome"
            /note="metagenomic"
    gene     complement(143..535)
            /locus_tag="wEsol_01870"
    CDS      complement(143..535)
            /locus_tag="wEsol_01870"
            /codon_start=1
            /transl_table=11
            /pfam="Pfam-B_13199 zf-dskA_traR"
            /fullproduct="qcoverage 100 , hcoverage 100 , similarity
            100 , identity 100 , eval 8.35e-83 , alnlength 130 ,
            Bacteria , Proteobacteria , WP_010963040.1 MULTISPECIES:
            TraR/DksA C4-type zinc finger protein [Wolbachia]"
            /translation="MEKLPKIKSPEDYTPSEDEEYMSVKQLEYFSLKLQSLAELEKQ

```

```

ELEDNSIDTYYSDEDSGNEELIKRRKDRKEKIKEALEKIKLGTGYCDGTGEEIGVER
LKANPLAIYCIEEQERVEKEKNVYNIND"
/product="TraR/DksA C4-type
zinc finger protein"
/besthit="qcoverage 100 , hcoverage 100 , similarity 100
, identity 100 , evalue 8.35e-83 , alnlength 130 ,
Bacteria , Proteobacteria , WP_010963040.1 MULTISPECIES:
TraR/DksA C4-type zinc finger protein [Wolbachia]"
gene 642..1289
/locus_tag="wEsol_01871"
CDS 642..1289
/locus_tag="wEsol_01871"
/codon_start=1
/transl_table=11
/fullproduct="qcoverage 100 , hcoverage 100 , similarity
100 , identity 100 , evalue 2.90e-138 , alnlength 215 ,
Bacteria , Proteobacteria , WP_015589376.1 MULTISPECIES:
heme exporter protein CcmB [unclassified Wolbachia]"
/cog="CcmB COG2386 221 ABC-type transport system involved
in cytochrome c biogenesis, permease component"
/pfam="CcmB"
/tigr="TIGR01190 ccmB 211 heme exporter protein CcmB"
/product="heme exporter
protein CcmB"
/translation="MIDSVKKLVIDDDKNFTYIVCIFIIMLSLSSFTLKNNNKQEVMLT
LTWICATFVLQISTNNLFTSDYHDGILEQIFVQPLSSRLIVAYKIFAHWLLFGLPISV
ISSIFSFAILGNSIEHSIAVGVSLLFNTLIITNISATGNALMIGQNNLASGVSQILVL
PMIMPTFVYFKMLTQFENLSLNIYTLITLVFVILIVNSTVTTMHMALKFAVEQD"
/besthit="qcoverage 100 , hcoverage 100 , similarity 100
, identity 100 , evalue 2.90e-138 , alnlength 215 ,
Bacteria , Proteobacteria , WP_015589376.1 MULTISPECIES:
heme exporter protein CcmB [unclassified Wolbachia]"
gene complement(1766..2431)
/locus_tag="wEsol_01872"
CDS complement(1766..2431)
/locus_tag="wEsol_01872"
/codon_start=1
/transl_table=11
/fullproduct="qcoverage 100 , hcoverage 100 , similarity
100 , identity 100 , evalue 1.40e-157 , alnlength 221 ,
Bacteria , Proteobacteria , WP_012673367.1 MULTISPECIES:
tRNA (guanosine(46)-N7)-methyltransferase TrmB
[Wolbachia]"
/cog="COG0220 COG0220 227 Predicted
S-adenosylmethionine-dependent methyltransferase"
/pfam="Methyltransf_4"
/product="tRNA
(guanosine(46)-N7)-methyltransferase TrmB"
/translation="MLFKNSKWIRSFRRSRRLKPDVDEILEKYSIQNSKESIEKIVNS
QKRIWVEIGFGNGENMLYQVLNEPDLFLFIGCEPYLKGVSRLLTNIEIQNIKILMWTE
DARELIANFPDINSVERFFILFPDPWPKRSHNKRRLINTEFLNLLAKKILITGEIFIAT
DHQDYAEWIASHIKQCNSLIYREDDFTSYTLTKYHRRALKDQRKVRFFKVSVINNLQT
MDQ"
/besthit="qcoverage 100 , hcoverage 100 , similarity 100
, identity 100 , evalue 1.40e-157 , alnlength 221 ,
Bacteria , Proteobacteria , WP_012673367.1 MULTISPECIES:
tRNA (guanosine(46)-N7)-methyltransferase TrmB
[Wolbachia]"
gene 2571..4223
/locus_tag="wEsol_01873"

```

CDS 2571..4223  
 /locus\_tag="wEsol\_01873"  
 /codon\_start=1  
 /transl\_table=11  
 /fullproduct="qcoverage 100 , hcoverage 100 , similarity 100 , identity 100 , evalue 0.0 , alnlength 550 , Bacteria , Proteobacteria , WP\_015589375.1 MULTISPECIES: 30S ribosomal protein S1 [unclassified Wolbachia]"  
 /cog="RpsA COG0539 541 Ribosomal protein S1"  
 /pfam="S1 S1 S1 S1 S1 S1"  
 /tigr="TIGR00717 rpsA 516 ribosomal protein S1"  
 /product="30S ribosomal protein S1"  
 /translation="MNNNNPVVNLPVTIRKLSSNKFIEEICQGQFEDQDNTLFEDSFV NKIKEGDVVEGVITRINPNDVVVDIGLKSDGRILIKELGCNDEVIIGSKIRVYVERIE DYHGNVVLRSREKAIRDEKWNKLEEDTVTRAESVGVIKRSIKCGFIVDLGDGISAFLPL SHVDLKQVKDAKHLIETEQKFIVLKMDKKQGNIVVSRKLVLEKLHAGEKIKFLESNE GDIIIEGKIKSITHYGVFVGIIHESDVVGVIDGLLHITDISWSRVSHPSAVFTCGQTIKV KIIKIDKENAKISLGVKQLEDSPWQDAESKYPVDSVNKGIVTSIEDYGLFVELRPGIE GLVHSSEITWVKSNLPVSSLVTRGQEVYVKILSIDIAKSRMSLSMKRCVDNPNWQVFIN KYPPGSIVSGEVKNNTGSYVSVAFGDSEIDENVEGTIYVKDFSWSKNGSDEIKKYNVG DKIEAKVIRANVNRARTYLGIIKQIEYDPLEELIKKVKVGDKIQVIVGKREDNGLVVEV ENDVTLIDQEHLPENKKFSISEKIEVEVLGVVEYNIALSAK"  
 /besthit="qcoverage 100 , hcoverage 100 , similarity 100 , identity 100 , evalue 0.0 , alnlength 550 , Bacteria , Proteobacteria , WP\_015589375.1 MULTISPECIES: 30S ribosomal protein S1 [unclassified Wolbachia]"

gene 4253..4531  
 /locus\_tag="wEsol\_01874"

CDS 4253..4531  
 /locus\_tag="wEsol\_01874"  
 /codon\_start=1  
 /transl\_table=11  
 /fullproduct="qcoverage 100 , hcoverage 100 , similarity 100 , identity 100 , evalue 2.54e-57 , alnlength 92 , Bacteria , Proteobacteria , WP\_010963035.1 MULTISPECIES: integration host factor subunit beta [Wolbachia]"  
 /cog="HimA COG0776 94 Bacterial nucleoid DNA-binding protein"  
 /pfam="Bac\_DNA\_binding"  
 /tigr="TIGR00988 hip 94 integration host factor, beta subunit"  
 /product="integration host factor subunit beta"  
 /translation="MATKSDIIARVAKRHPFLDKIVIAAIVDRFFGILSSTLKHNNRV EIRGFGSFSVRSYNLKETSHLMLQKFTKNQYFKTYFRSSKKLSDLIN"  
 /besthit="qcoverage 100 , hcoverage 100 , similarity 100 , identity 100 , evalue 2.54e-57 , alnlength 92 , Bacteria , Proteobacteria , WP\_010963035.1 MULTISPECIES: integration host factor subunit beta [Wolbachia]"

gene 4604..4930  
 /locus\_tag="wEsol\_01875"

CDS 4604..4930  
 /locus\_tag="wEsol\_01875"  
 /codon\_start=1  
 /transl\_table=11  
 /fullproduct="qcoverage 100 , hcoverage 100 , similarity 100 , identity 100 , evalue 5.72e-66 , alnlength 108 , Bacteria , Proteobacteria , WP\_010082086.1 MULTISPECIES: cell division protein ZapA [Wolbachia]"

```

/cog="zapA COG3027 105 Cell division protein ZapA
(stimulator of FtsZ polymerization and Z-ring component)"
/pfam="ZapA"
/product="cell division
protein ZapA"
/translation="MQVVEIVIRNNTYKISCESGKGNHLLRLANSFDKLVSSVSQKTG
GKGSDALNFLLAALILEDKILELTKRLDEVNQEREKYRNEKRIEYTEVLDKVNKIITN
LECIKD"
/besthit="qcoverage 100 , hcoverage 100 , similarity 100
, identity 100 , evalue 5.72e-66 , alnlength 108 ,
Bacteria , Proteobacteria , WP_010082086.1 MULTISPECIES:
cell division protein ZapA [Wolbachia]"
gene complement(4905..5183)
/locus_tag="wEsol_01876"
CDS complement(4905..5183)
/locus_tag="wEsol_01876"
/codon_start=1
/transl_table=11
/fullproduct="qcoverage 100 , hcoverage 100 , similarity
100 , identity 100 , evalue 4.03e-63 , alnlength 92 ,
Bacteria , Proteobacteria , WP_006279484.1 MULTISPECIES:
succinate dehydrogenase assembly factor 2 [Wolbachia]"
/cog="COG2938 COG2938 94 Uncharacterized conserved
protein"
/pfam="Sdh5"
/product="succinate
dehydrogenase assembly factor 2"
/translation="MTDTSLLRRKLIYRSWHRGCKETDILLGHFALKYLDKFSLSSELI
EYEKIVDLDDYELYCYITRKTNLPPGLNSQIVNLIACFIEANPLCTQD"
/besthit="qcoverage 100 , hcoverage 100 , similarity 100
, identity 100 , evalue 4.03e-63 , alnlength 92 ,
Bacteria , Proteobacteria , WP_006279484.1 MULTISPECIES:
succinate dehydrogenase assembly factor 2 [Wolbachia]"
gene 5283..6401
/locus_tag="wEsol_01877"
CDS 5283..6401
/locus_tag="wEsol_01877"
/codon_start=1
/transl_table=11
/fullproduct="qcoverage 100 , hcoverage 100 , similarity
100 , identity 100 , evalue 1.72e-261 , alnlength 372 ,
Bacteria , Proteobacteria , WP_012673365.1 MULTISPECIES:
RIP metalloprotease RseP [unclassified Wolbachia]"
/cog="COG0750 COG0750 375 Predicted membrane-associated
Zn-dependent proteases 1"
/pfam="Peptidase_M50 PDZ PDZ_2"
/product="RIP
metalloprotease RseP"
/translation="MELISNLIHQFSDGIYYFLSFSLIISVIVFVHEYGHYVVAKACK
VKVESFSIGFGPEIFGFNDKSGTRWKLSAVPLGGYVKMLGDTNAASVPADQQELTEEE
KLYSFHTKPRHKKAHVVFAGPFANMVFVAVIAFTIFFSIAGYYRTPPVIENVIEGSAK
QAGLLPGDTITQINEHKIKYFEDISRVIMSNPKTRMEIEYSRNEKHRTSLTPLIIKD
KDVFGNTIERETIGIISVNTLKQSSFLGAVSLSVSETYHTMCLTIKALFHIIVGKRSI
NEIGGPIKIAKYSGQSAKKGFIIMVLYFMAIISANLAINLLPIPLLDGGHFLFYHIIIEA
VIRRDLSLKCQKYAAIFGALVLFLLMATGMSNDIRDLF"
/besthit="qcoverage 100 , hcoverage 100 , similarity 100
, identity 100 , evalue 1.72e-261 , alnlength 372 ,
Bacteria , Proteobacteria , WP_012673365.1 MULTISPECIES:
RIP metalloprotease RseP [unclassified Wolbachia]"
gene 6410..8746

```

CDS

```
/locus_tag="wEsol_01878"
6410..8746
/locus_tag="wEsol_01878"
/codon_start=1
/transl_table=11
/fullproduct="qcoverage 100 , hcoverage 100 , similarity
100 , identity 99.9 , evalue 0.0 , alnlength 778 ,
Bacteria , Proteobacteria , WP_015589374.1 MULTISPECIES:
outer membrane protein assembly factor BamA [unclassified
Wolbachia]"
/cog="COG4775 COG4775 766 Outer membrane
protein/protective antigen OMA87"
/pfam="Surf_Ag_VNR Surf_Ag_VNR Surf_Ag_VNR Surf_Ag_VNR
Surf_Ag_VNR Bac_surface_Ag"
/tigr="TIGR03303 OM_YaeT 741 outer membrane protein
assembly complex, YaeT protein"
/product="outer membrane
protein assembly factor BamA"
/translation="MKKLFYILVVVFISFPALLVALGTAEKVQVKDVKCIGNERNVSNQ
TIGFYIKLKSGDYINDDIDSIKDLKYTKLFASVNAYIDDKKNLVIKIQENPLINKI
ILKGNKLFNSKELLNNVIQSKSLTIFTESKLQNDLMNLITTYRNNGKVGKIEYELEK
LDSNRVNLIFKIKEGKTSKIKDIRFIGNKNFSENELEQVIKRHSNDIFSKLFRAIFKG
ENHYSPQYLLINTELLDRFYSSKGYIQNNIQPIVEVDNNNQTELTFLIDEGQQYLFGN
NEVNIETEIQDLSLKEEILDFITEENDKIFNRVKINNTVEKINKYLNEKGYIFAKVNP
EYAQRDNVVDVTVRVLPGKKIYINQITIDGNDRTLDKVIRSKLSVAEGDAYNISEIQK
SRKKLMSSDFFETVKVNSYAVNDNTVNLDLNVKEKNTTSLYLGGGVSLPGGALIKIDL
KDRNLFGTGKELSFALKESQYVFSTDLFVENNFNDSDTSLGVDVFYEKQDKPNTTFD
SCDMGFFTKLSYKV TENLTNSLRYSKYNHIMDNKGGQD TDISEIILDRKGEHQISS
VGYT LAHNKLDNLYTPKEGYLLRLSQDISGLGGNVNFLKSEFLSFYTHPILSKIDDDI
TLRFKMAAGHIFS YTDENLNIGQHFFKGGNEIRGFDLSGIGPRAEDKNKSSLGGKTYF
NLTQQVDFPLPKLYDYAGIKGSLFVDYATLFGLDKKNKKYEGKYYDSKLVRVSPGFGF
SMLSPFGRLRLDFGFPLVKESYDIIPSPNVKFSIEAGI"
/besthit="qcoverage 100 , hcoverage 100 , similarity 100
, identity 99.9 , evalue 0.0 , alnlength 778 , Bacteria ,
Proteobacteria , WP_015589374.1 MULTISPECIES: outer
membrane protein assembly factor BamA [unclassified
Wolbachia]"
```

gene

8747..9298

CDS

```
/locus_tag="wEsol_01879"
8747..9298
/locus_tag="wEsol_01879"
/codon_start=1
/transl_table=11
/fullproduct="qcoverage 100 , hcoverage 100 , similarity
100 , identity 100 , evalue 8.56e-113 , alnlength 183 ,
Bacteria , Proteobacteria , WP_077188197.1 MULTISPECIES:
OmpH family outer membrane protein [Wolbachia]"
/cog="HlpA COG2825 170 Outer membrane protein"
/pfam="IncA HSDR_N OmpH XLF Pfam-B_1688"
/product="OmpH family outer
membrane protein"
/translation="MKYIQLFISVIALIISLFGYKFGVGYQPQNTKAAIIDSQKVIN
SLALQNIQQQIKEQNSRLQQEFESLEKLKPSKEEFELLSEEAKKEKTEQFNKHTVNT
RDNYAKKMLHLEESYRD AVESVFNKIKEVAKKTA EKNNIDLVLFI SKKNQVLYSMDEV
DLSDVVLNNINKKIPEFALKGIE"
/besthit="qcoverage 100 , hcoverage 100 , similarity 100
, identity 100 , evalue 8.56e-113 , alnlength 183 ,
Bacteria , Proteobacteria , WP_077188197.1 MULTISPECIES:
OmpH family outer membrane protein [Wolbachia]"
9303..9734
```

gene

CDS  
/locus\_tag="wEsol\_01880"  
9303..9734  
/locus\_tag="wEsol\_01880"  
/codon\_start=1  
/transl\_table=11  
/fullproduct="qcoverage 100 , hcoverage 100 , similarity 100 , identity 100 , eval 8.68e-98 , alnlength 143 , Bacteria;Eukaryota , Proteobacteria;Arthropoda , WP\_006279640.1 MULTISPECIES: 3-hydroxyacyl-ACP dehydratase FabZ [Wolbachia]"  
/cog="FabA COG0764 147  
3-hydroxymyristoyl/3-hydroxydecanoyl-(acyl carrier protein) dehydratases"  
/pfam="Pfam-B\_304 FabA"  
/tigr="TIGR01750 fabZ 141  
beta-hydroxyacyl-(acyl-carrier-protein) dehydratase FabZ"  
/product="3-hydroxyacyl-ACP dehydratase FabZ"  
/translation="MQFNISDIIKILPHSYFLLVDRVIECDPGKSIKAIKNVTFNEP  
FFIGHFPGHPIMPGLIIESLAQASAICVLGKETIENKVYLRISIENAKFRKPVTPGD  
TLILQANIQSVCLGVHKFRCIASVSEEKVAEATISAVLQNK"  
/besthit="qcoverage 100 , hcoverage 100 , similarity 100 , identity 100 , eval 8.68e-98 , alnlength 143 , Bacteria;Eukaryota , Proteobacteria;Arthropoda , WP\_006279640.1 MULTISPECIES: 3-hydroxyacyl-ACP dehydratase FabZ [Wolbachia]"

gene  
9780..11882  
/locus\_tag="wEsol\_01881"

CDS  
9780..11882  
/locus\_tag="wEsol\_01881"  
/codon\_start=1  
/transl\_table=11  
/product="hypothetical protein"  
/pfam="Pfam-B\_13919 Pyr\_redox\_2"  
/translation="MKLNFKISFSNLYTRNGLIKLDETFLNYIKSCDESLFCSLIEAR  
EKAASSSMSSQCHLPSSQCHPPSSQCLTLGSRKQEGRSATWMTDSQLIVDLSYLLDEF  
IAKLFNVEKEIEELKKKHNDFAVIYKCKRFLVQRYALKKYTNVANIDITNKLSHFTL  
PTTEKNFAEQVMHWFEDKENHKEEIELAAQYAVWRVKNKQSILFSIHKKIDHENLIPF  
SKKEVDKVEVLYSNEVKRRYGFDLTSKKVSLNKALDNAHYCIFCHKQSKDSCSKGLIN  
NDNTFKQSPLKVELHGCPLEQKISEMNLVKSEGYSIASLAIVMIDNPLCAATGHRICN  
DCMNSCIYQKQEPVNVPAIETRILDDVLSLPYGFEIYSLLSRWNPINLQFQSLPRGNTG  
KNVLVVGLPAGFNLAHLLNDGHNVIAIDGLKIEPLIDNFQLIKDFKHEKLSERMAG  
GFGGVAEYGITSRWDKNYLKIIRLLERRENFVLYGGIRFGGTINADDAFNLGFDHIA  
LALGSGKPRMIKINILARGVRMASDFLMSLQLTGALKFDSIANLQVRMPIVVIGAGL  
TAIDTATEALAYYPIQVEKFLRYEILVDKYGKDCVEKDWTEEREIANEFISHAQLI  
REKQKLAKKENREIKILELMQSLGGVKVIYRKELKDSPSYRLNSEEVQNALSEGIYFI  
ENLEPVEVVTDKYNHAVT"  
/besthit="qcoverage 99.7142857142857 , hcoverage 72.7083333333333 , similarity 100 , identity 100 , eval 0.0 , alnlength 698 , Bacteria , Proteobacteria , WP\_141457273.1 MULTISPECIES: FAD-dependent oxidoreductase [unclassified Wolbachia]"

ORIGIN

```
1 ttgcctgaac ggatacaact taatthttta tctgcaggag tcaagttgag aatgtccaat
61 tttccacttt ctttatagca taacatactt cagcgctctt tgctcctctt gaagtccaat
121 gggctcacca cttatgtgta aattaatcgt taatgttgta cacgttcttt tctttttcta
181 ctctctcttg ctcttcaata caatatatag caagcggatt agctttaagt ctttcgactc
241 ctatttcttc tcctgttcca tcgcagtaac cataagtgcc taatthttatt ttttctaacg
301 cctccttaat tttttctttt ctatcttttc gacgcttgat taattcctcg tttccactat
361 cttcatcaga atagtatgta tcaatactat tatcttctag ttcttgtttc tctaactcag
```

|      |             |             |             |             |             |             |
|------|-------------|-------------|-------------|-------------|-------------|-------------|
| 421  | cgagtattga  | ttgtaacttt  | aagctgaagt  | attccagttg  | ttttacgctc  | atatattctt  |
| 481  | catcttctga  | aggagtgtaa  | tcttctggtg  | actttatttt  | tggttaacttt | tccataattg  |
| 541  | cattatcaaa  | aaaataataa  | aacctatata  | atztatgaac  | aaaaaattat  | actacctcaa  |
| 601  | agtaaact    | ataatttata  | ataaacattt  | aaaagcctag  | tatgatcgac  | tcagtaaaaa  |
| 661  | aattagtaat  | agatgataag  | aactttacct  | atatagtatg  | tatttttatc  | ataatgttaa  |
| 721  | gtttatcttc  | atttacactt  | aaaaacaaca  | ataaacaaga  | agttatgtta  | acattaacat  |
| 781  | ggatatgtgc  | tacatttggt  | ttgcagattt  | ctacaaataa  | tttgtttaca  | tctgattatc  |
| 841  | atgatggaat  | attagagcaa  | atctttgtac  | agccactctc  | ttctaggctt  | atagttgctt  |
| 901  | ataaaaatttt | cgctcactgg  | ttattatttg  | ggttaccgat  | ttcagtaatt  | tcttccatat  |
| 961  | tcagctttgc  | aattctaggc  | aatagtattg  | aacactcaat  | agcagttgga  | gtgtctttat  |
| 1021 | tatttaatac  | gctgataatc  | actaatattt  | cagctactgg  | aaatgcattg  | atgattggtc  |
| 1081 | aaaacaactt  | agcatcagga  | gtatcgcaaa  | ttcttgtttt  | gccaatgata  | atgccaacct  |
| 1141 | ttgtgtattt  | taaaatgcta  | actcaatttg  | aaaatttatc  | cttgaatatt  | tatacactac  |
| 1201 | taatcaccat  | cttagttttt  | gttattttga  | ttgttaacag  | cactgtaact  | actcacatgg  |
| 1261 | cactaaaatt  | tgctgtggaa  | caggattgaa  | aaatcttact  | gttattcagt  | agacttcttg  |
| 1321 | cataacctag  | aaaaaaggca  | aatagtattt  | atagatttag  | gtttatcgac  | aatttgaaaa  |
| 1381 | accttcattt  | cagcatcctt  | ccctgtcatc  | caagtagccc  | ttcgttgtca  | tcccagtgtc  |
| 1441 | aaaaactggg  | ataacagcta  | acctgacaac  | cgctatcccg  | ctacttgtta  | gcggtcaaga  |
| 1501 | gataccgtga  | cggtatgacg  | gttcgcggtg  | gcatgacgat  | aagcctcatc  | atcccgtac   |
| 1561 | gtgttagcgc  | cgcggcggtg  | tgacgattcg  | cagcggcatg  | acgagaaaagg | ggctacttgg  |
| 1621 | atgatacctt  | ttttctactt  | agtttggtt   | atgcaagaag  | tctattcctt  | cataaggaga  |
| 1681 | agtagttaaa  | ggaatttact  | ctatttctcc  | ctcttttttt  | attattttta  | atctatagtt  |
| 1741 | aacgtaaaag  | agatatgcaa  | aaactctatt  | gatccatagt  | ctgcaaatta  | ttaataacac  |
| 1801 | ttacttttaa  | gaacctcact  | ttacgctgat  | ctttgagcgc  | tcttctgtgg  | tattttgtaa  |
| 1861 | gagtataact  | tgtgaaatcg  | tcttccttat  | agattaaaga  | gttactactgc | tttatatgtg  |
| 1921 | atgctatcca  | ctctgcatag  | tcctgatgat  | cggttgcaat  | gaatatttcc  | cctgttataa  |
| 1981 | gtattttttt  | tgctaataaa  | tttaaaaatt  | ccgtattaat  | taatcgtctt  | ttattgtgac  |
| 2041 | ttcttttttg  | ccatggatct  | ggaaagagaa  | taaagaatct  | ttcaactactg | ttatcaggaa  |
| 2101 | aatttgcaat  | caattctctt  | gcatcttctg  | tccacattaa  | aatatttttt  | atgttctgta  |
| 2161 | tttctatggt  | tgtcagcaag  | cgagaaaacc  | cctttaagta  | gggctcacat  | cctataaata  |
| 2221 | atagatcagg  | ttcattgagc  | acctggtaaa  | gcataatttc  | accgttgcca  | aagcctattt  |
| 2281 | ctacccatat  | tcttttttgt  | gaattttaca  | ttttctctat  | agattccttg  | ctgttttgaa  |
| 2341 | tagaatattt  | ttccaatatt  | tcatacaacat | caggtttttag | cctggacctt  | ctggagaacg  |
| 2401 | atctaatacca | cttgctattc  | ttaaatagca  | tattcttgat  | acatatataa  | ttttctcact  |
| 2461 | atatttttata | tagcttaaac  | aattctcgaa  | atgagttaat  | gaaaaattac  | ttgtcaataa  |
| 2521 | ttgttaatat  | tatataatat  | atgagttcta  | ataaagttta  | agttaaagggt | atgaataata  |
| 2581 | ataatccagt  | cgtaaatcta  | ccggttacta  | tcagaaaagct | atcatcaaac  | aaatttatag  |
| 2641 | aagagatatg  | tcaaggccaa  | tttgaggatc  | aagataatac  | cttgtttgaa  | gattcttttg  |
| 2701 | ttaacaaaat  | taaagaagga  | gatgtggtag  | aagggtgtaat | tacaagaata  | aaccctaacg  |
| 2761 | acgttggtgt  | tgatattggt  | ttaaaatctg  | acgggagaaat | tctgatcaag  | gaactcgggt  |
| 2821 | gtaatgatga  | ggtcattatt  | ggctcgaaaa  | tcagagttta  | tgtggaaaga  | attgaagatt  |
| 2881 | atcatggtaa  | tgttgttctt  | agtcgtgaaa  | aagcaattag  | ggacgaaaaa  | tgggaataagt |
| 2941 | tggagaaga   | tacagttaca  | agggctgaag  | taagcggagt  | tattaaacgc  | tcaattaaat  |
| 3001 | gtggctttat  | tgttgatctt  | ggtgacggaa  | taagcgcctt  | tttaccgctg  | agtcatgtgg  |
| 3061 | atgtgaagca  | agtaaaagat  | gcgaagcacc  | ttattgaaac  | tgaacaaaag  | ttcatcgtgc  |
| 3121 | ttaaaatgga  | taagaagcag  | ggcaatattg  | tagtatcaag  | aaagctgggtg | ttagaaaaat  |
| 3181 | tgcacgctgg  | tgaaaaaatt  | aaatttttag  | aatctttaaa  | tgaaggcgat  | ataatagaag  |
| 3241 | ggaaaataaa  | aagtatcact  | cattacggtg  | tatttgtcgg  | tattcatgaa  | tcagatgtag  |
| 3301 | tgggagttat  | agatggattg  | ttacatatta  | cagatatctc  | ttggagtagg  | gtaagtcac   |
| 3361 | cgtctgcagt  | ttttacttgt  | ggtcagacta  | taaaagttaa  | aattataaaa  | atagataagg  |
| 3421 | aaaatgctaa  | aatttccttg  | ggtgtgaagc  | agctagaaga  | tagcccttg   | caagatgcag  |
| 3481 | agtcaaaaata | tccagttgat  | agtgtgaata  | agggttatgt  | aacaagcata  | gaagattatg  |
| 3541 | gattatttgt  | tgagcttaga  | cctggaattg  | aaggtttagt  | gcactcgtca  | gaaataactt  |
| 3601 | gggttaagag  | taattttacca | gttagtagtc  | tcgtaacaag  | gggacaagaa  | gtatatgtaa  |
| 3661 | aaattctcag  | tattgacatt  | gctaagagta  | ggatgagttt  | aagcatgaaa  | aggtgtgtag  |
| 3721 | acaacccttg  | gcaagtattt  | atcaataaat  | atcctcctgg  | ttctattggt  | tctggtgaag  |
| 3781 | tgaagaataa  | taccggctca  | tatgtatctg  | ttgctttcgg  | tgattctgaa  | atagatgaga  |
| 3841 | acgtagaagg  | gacaatatat  | gtgaaagatt  | ttagttgggtc | taaaaatggt  | tcagatgaga  |
| 3901 | taaagaagta  | taatgtaggt  | gataaaaatag | aagcaaaaagt | aataaggggt  | aacgtgaatc  |
| 3961 | gggcaagaac  | ttatcttgga  | ataaaacaaa  | tagagtatga  | tcctcttgaa  | gaactgataa  |

|      |             |             |             |             |             |             |
|------|-------------|-------------|-------------|-------------|-------------|-------------|
| 4021 | agaaagttaa  | ggtaggtgat  | aaaatacagg  | ttattgtagg  | taagagagaa  | gataatggac  |
| 4081 | tagtcgttga  | agttgagaac  | gatgtaaccc  | ttctaataga  | tcaagagcat  | ttaccagaga  |
| 4141 | ataaaaaaatt | ctctatatca  | gaaaaaatag  | aagttgaagt  | attgggtggt  | gaagaatata  |
| 4201 | acatagcatt  | atctgctaag  | tgataagggt  | tacttatttt  | ggcttcatat  | aaatggcaac  |
| 4261 | aaagtctgat  | ataatagcga  | gggtagcaaa  | aagacatcct  | tttttagata  | agattgttat  |
| 4321 | agcagctata  | gttgatagat  | tttttgggat  | actttcaagc  | acattgaaac  | atcataatag  |
| 4381 | agttgaaatt  | aggggggtttg | gttctttttc  | agttagaagt  | tataacttga  | aagaaacaag  |
| 4441 | ccattttaatg | ttacagaagt  | ttacaaagaa  | tcaatacttt  | aaaacatat   | ttcgtagcag  |
| 4501 | taaaaaatta  | tctgatttga  | taaatgaata  | aaaattttata | ccataaataa  | gatgaaagta  |
| 4561 | gggggtttgag | tttatactgt  | acgatagaaa  | tttttagcac  | catatgcaag  | tagtagaaat  |
| 4621 | agttatacgt  | aataacacat  | ataaaatatc  | ttgcgaaagt  | gggaagggga  | atcattttatt |
| 4681 | acgccttgct  | aatagttttg  | acaagttagt  | tagttctgta  | tctcaaaaaa  | ctggaggttaa |
| 4741 | gggttcggat  | gcattaaatt  | tcttacttgc  | agcactaatt  | cttgaggata  | aaatttttaga |
| 4801 | attaacaaag  | cgattagatg  | aagtaaatac  | agagcgcgaa  | aagtatagaa  | acgagaaaag  |
| 4861 | aatagaatat  | actgaggtag  | tagataagg   | aaataagatt  | atcactaatc  | ttgagtgcac  |
| 4921 | aaaggattag  | cttcaataaaa | gcaagcaatt  | aaattgacta  | tctgactatt  | caagccagga  |
| 4981 | gggaggtttg  | tcttacgagt  | tatgtaacaa  | tataattcgt  | aatcatcaag  | atcaactatt  |
| 5041 | ttttcgtatt  | cgattagttc  | gcttaaggaa  | aattttatcaa | gatattttcaa | tgcgaaatgc  |
| 5101 | cctaaaagta  | tatcgggtttc | tttgcaaccc  | ctatgccagc  | ttctatatata | taatttttctt |
| 5161 | ctgagtagtg  | aggtatctgt  | cattacaatt  | aaactttttt  | taattttaaaa | gttaaactaa  |
| 5221 | atacttgtca  | agcgaggcgc  | atttttaatat | acttaacatt  | ttgttaagat  | ctaaatatac  |
| 5281 | aggtggaatt  | aatttctaatt | cttatccatc  | aatttagcga  | tggaatatata | tatttttttat |
| 5341 | cattttcttt  | aataattttct | gtcatagtat  | tcgtgcatga  | atatgggcat  | tatgttggtg  |
| 5401 | caaagcatg   | caaagttaaa  | gttgaatctt  | tttccatagg  | ttttggctct  | gaaatttttg  |
| 5461 | gttttaacga  | taagtctgga  | actagatgga  | aattaagcgc  | tgttccattg  | ggtggttatg  |
| 5521 | ttaaaatgct  | aggagatact  | aatgcagcga  | gtgtcccagc  | tgatcaacaa  | gaattaacgg  |
| 5581 | aagaagaaaa  | attgtattca  | tttcatacaa  | aaccgcgtca  | taaaaaagca  | gcagtagttt  |
| 5641 | ttgcagggcc  | ttttgcaaac  | atgggtatttg | ctgttatagc  | ttttacaata  | ttcttttagca |
| 5701 | tagcaggtta  | ttatcgcact  | ccaccggtga  | ttgaaaaatgt | aatcgaagg   | agtgacagta  |
| 5761 | agcaagctgg  | tttggttgcca | ggtgacacta  | ttacacaaat  | caatgagcat  | aaaataaaat  |
| 5821 | actttgaaga  | tatttcacgt  | gtgataatgt  | cgaatcctaa  | aacaagaatg  | gagattgagt  |
| 5881 | atagcagaaa  | taatgagaag  | cacaggacca  | gtttaactcc  | attaataatc  | aaggacaaag  |
| 5941 | acgttttttg  | caacacaata  | gaaagagaaa  | ctatagggat  | tattttcagtc | aatacattaa  |
| 6001 | agcagtcgtc  | ttttcttggg  | gctgtgagct  | tatcagtaag  | tgaaacttac  | cacactatgt  |
| 6061 | gcttaacgat  | caaagctctc  | tttcacatta  | ttgttggttaa | aaggagtatc  | aatgaaatag  |
| 6121 | gtggaccaat  | aaaaatcgca  | aaatattcag  | gacaatcagc  | taaaaaggga  | tttattatgg  |
| 6181 | ttctatatatt | tatggcaatc  | attttcagcta | atttagctgc  | aattaacttg  | ctgccaatac  |
| 6241 | cactgctaga  | tggtgggcat  | ttattttcatt | atatcataga  | agcgggttata | cgtagggatt  |
| 6301 | taagcttgaa  | atgtcaaaaa  | tatgcagcta  | tttttggtgc  | tttagtggtg  | tttttgctta  |
| 6361 | tggcaactgg  | aatgtcaaat  | gatattaggg  | atcttttttg  | aaataaaaata | tgaaaaagct  |
| 6421 | attttatata  | ctggtagtgg  | tttttatttc  | ttttcctgcc  | ctgcttggtg  | cttttaggaac |
| 6481 | tgcggaaaaa  | gtgcagggtga | aagatgtcaa  | atgtattggt  | aatgagaggg  | taagcaacca  |
| 6541 | gacaataggg  | ttctatatata | aactaaaatc  | tggtgattat  | ataaacgacg  | atgatataga  |
| 6601 | ctcaattata  | aaagatctat  | ataaaacaaa  | gttattttgct | agtgttaatg  | cttacataga  |
| 6661 | tgataaaaaa  | aattttggtaa | taaaaattca  | agaaaaatcca | ctaattaaca  | agataaatatt |
| 6721 | aaagggtaat  | aagttatttta | atagcaaaaga | gttactaaat  | aatgtgattc  | agtcaaaaatc |
| 6781 | gctaactatt  | ttcactgaat  | caaaattgca  | aaacgattta  | atgaatttaa  | tcactactta  |
| 6841 | tagaaataac  | ggtaagggtg  | gcgttaaaaat | tgaatatgag  | ttggagaagc  | tcgatagtaa  |
| 6901 | taggggtcaat | ctaatttttca | aaataaaaaga | aggcaaaaacc | tctaaaaatta | aggatataag  |
| 6961 | attttataggc | aataaaaaact | tttctgaaaa  | tgagctagag  | caagttatta  | aaagacatag  |
| 7021 | taatgacata  | tttagtaagt  | tattttagagc | cattttttaaa | ggcgaaaatc  | attattcacc  |
| 7081 | gcaatatcta  | ttgattaaca  | cagaattgct  | cgatcgtttt  | tattcgtcta  | agggatatata |
| 7141 | tcaaaataat  | attcaaccaa  | ttggttaggt  | tgataataac  | aatcaaacag  | agttaacttt  |
| 7201 | tttgattgac  | gaaggacagc  | agtattttgtt | tggaataaat  | gagggttaata | ttgaaactga  |
| 7261 | aattcaggat  | ttgagcctaa  | aagaagaaat  | attggatttt  | ataacagagg  | aaaacgataa  |
| 7321 | gatattttaat | agagttaaaa  | ttaataatac  | agtagaaaaa  | ataaacaaat  | atttaaatga  |
| 7381 | aaaaggatat  | atattttgcaa | aagttaatcc  | agagtatgca  | caacgtgaca  | acgttgtaga  |
| 7441 | tgtaacctac  | agagtgtctgc | cgggtaaaaa  | gattttatata | aatcaaatga  | caattgatgg  |
| 7501 | taacgatcgc  | acttttagata | aagtgatcag  | aagtaagcta  | agtgtagcag  | aaggtagtgc  |
| 7561 | gtacaatata  | tctgagattc  | aaaagtcacg  | taaaaaacta  | atgagtagtg  | atttttttga  |

|       |             |             |            |              |             |             |
|-------|-------------|-------------|------------|--------------|-------------|-------------|
| 7621  | aacagtga    | gtaaatagt   | acgcagtta  | tgacaata     | gtaaatctt   | acttaa      |
| 7681  | taaagaaa    | aacactact   | cgttgtatt  | gggaggcgg    | gtgtctctt   | ctggtggag   |
| 7741  | attgattaa   | attgacctc   | aagaccgta  | tttatttgg    | actggaaa    | agctctctt   |
| 7801  | tgctcttg    | aaaagtca    | acgtatttt  | tactgattt    | gagtttgtt   | aaaataatt   |
| 7861  | taatgattc   | gatacgtc    | taggtgtag  | cgtattttt    | gaaaaaca    | ataagccaa   |
| 7921  | cactacttt   | gatagttgc   | atatggggt  | ttttacaa     | ttatcatat   | aagtcacag   |
| 7981  | gaacttaac   | aattccctt   | gctattctt  | taagtata     | catatacac   | tggataata   |
| 8041  | gggtggaca   | gacaccgata  | tctctgaa   | aatactgg     | cgaaaagg    | aacatcaga   |
| 8101  | ttcatcagt   | ggatacacg   | tggcacata  | taaactgg     | aacctctat   | ctccaaaag   |
| 8161  | agggtattt   | ctgcgctta   | gtcaggatat | ttcaggatt    | ggaggaaac   | tgaatttcct  |
| 8221  | aaaatctga   | ttcttatct   | tttatacg   | ccctatatt    | agcaaaatt   | acgatgat    |
| 8281  | aactctacg   | tttaagatg   | cggcaggtc  | tattttttt    | tatactgat   | aaaatctaa   |
| 8341  | cattggccag  | cactttttt   | aagggggta  | tgagattag    | gggtttgac   | tttccggtat  |
| 8401  | tggaccaag   | gcagaagac   | aaaataaaa  | ctcattagga   | ggcaaaact   | attttaatct  |
| 8461  | aacacagca   | gtggatttt   | ctctaccaa  | actatatga    | tatgctggta  | tcaaaggctc  |
| 8521  | actatttgt   | gactatgcg   | cactttttt  | cttagatgat   | aaaaataag   | agtatgaagg  |
| 8581  | gaaatactat  | gatagcaag   | ttgtgagagt | gtcaccaggt   | tttggcttt   | caatgctttc  |
| 8641  | tccttttgg   | agacttagat  | tggatttcg  | gtttccttt    | gtaaagga    | cttatgat    |
| 8701  | aataccatc   | ccaaatgtt   | aattttctat | tgaagcggg    | atttgaatga  | aatatatac   |
| 8761  | gttattttat  | tcagttattg  | ccttaattat | ttccttatt    | gtgggggtat  | agttttagg   |
| 8821  | atatcaacct  | cagaacacaa  | aggctgccat | tattgatagt   | gataaagtta  | tcaatgaatc  |
| 8881  | tcttgctctg  | caaaacatac  | aacaacaaat | aaaggagcag   | aattctagat  | tacaacaaga  |
| 8941  | atttgaaagt  | gagttagaaa  | aacttaagcc | atcaaaagaa   | gaatttgaac  | ttttgtcaga  |
| 9001  | agaagcaaaa  | aaagaaaaga  | cagaacagtt | taataagcac   | actgtaaata  | ctagagataa  |
| 9061  | ttacgctaaa  | aaaatgttac  | atttagaaga | aagctataga   | gacgcagtag  | agagtgtttt  |
| 9121  | taacaagata  | aaagaagtcg  | ctaaaaaaac | ggcagaaaaa   | aacaacatag  | atttgggtact |
| 9181  | atttattttca | aaaaagaacc  | aagttttata | ctccatggat   | gaagttgatt  | tatcagatgt  |
| 9241  | ggtattaaac  | aatataaaca  | agaaaatacc | tgaatttgct   | ttgaaaggca  | ttgagttaggc |
| 9301  | ttatgcaatt  | taatatcagt  | gatattataa | aaatattacc   | acattcttat  | ccgtttctct  |
| 9361  | tagtagatag  | agttatagag  | tgtgatcctg | gtaaaagtat   | aaaagcaatc  | aaaaatgtga  |
| 9421  | ctttcaatga  | gccatttttt  | attggccact | tccctggtca   | tccgataatg  | ccaggagtct  |
| 9481  | tgataattga  | atctctagct  | caggcatctg | ctatatgtgt   | tctaggtaaa  | gaaacaatag  |
| 9541  | aaaataaagt  | tgtttacttg  | agatccattg | aaaatgcaaa   | attcagaaag  | ccagttactc  |
| 9601  | caggggacac  | attgattctt  | caagctaaca | ttcaaagtgt   | gtgttttaggt | gtacacaaat  |
| 9661  | ttaggtgtat  | tgcatctggt  | agcgaagaaa | aagttgcaga   | agcaacaatc  | tcagcagtat  |
| 9721  | tgcaaaataa  | ataaaatctt  | catctgtaa  | aaacagcatg   | tacactgtat  | agtatagcaa  |
| 9781  | tgaagctgaa  | tttcaaaatc  | tcatttttga | atctatatatac | tcgcaatgga  | ttataaaat   |
| 9841  | tagatgagac  | attttttgaat | tatatcaaat | catgtgatga   | gagcttggtt  | tgttcattaa  |
| 9901  | ttgaagcaag  | agaaaaagca  | gcttcttctt | cgatgtcatc   | ccagtgtcac  | ctcccatcat  |
| 9961  | cccagtgcca  | ccccccgtca  | tcccagtgct | tgacactggg   | atctagaaaa  | caagaaggac  |
| 10021 | ggtcagctac  | ttggatgaca  | gatagtcagt | taatagtaga   | cctctcatat  | ttacttgatg  |
| 10081 | aattttattgc | aaaacttttc  | aatgttgaaa | aagaaataga   | ggagctaaag  | aaaaagcaca  |
| 10141 | acgactttgc  | tgtaatatat  | aaatgcaaaa | ggttatttgt   | ccaacgctat  | gcattgaaga  |
| 10201 | aatacactaa  | tgtggcgaat  | atagatatta | ctaacaaact   | aagtcatttt  | ctcactttgc  |
| 10261 | caacaacaga  | aaaaaatttt  | gctgagcagg | tgatgcattg   | gtttgaagat  | aaagaaaatc  |
| 10321 | acaaagaaga  | aatagaactt  | gcagcacaa  | atgcagtggt   | gagagtaaaa  | aataaacaga  |
| 10381 | gtatattatt  | cagtattcat  | aaaaaaatcg | accacgaaaa   | cctcatacca  | ttttctaaaa  |
| 10441 | aagaagtgga  | caaagttgaa  | gtgctgtatt | caaatgaagt   | aaaaagacga  | tacggttttg  |
| 10501 | atctaacaag  | caaaaagggtg | agtttgaata | aagcactaga   | taatgctcac  | tactgcatat  |
| 10561 | tttgtcataa  | gcaaagtaag  | gacagctgct | caaaggggct   | aattaataac  | gacaataact  |
| 10621 | ttaaacaatc  | tccactaaaa  | gttgaactgc | acggctgccc   | actagagcag  | aaaatatcag  |
| 10681 | aatgaatct   | ggtgaaaagc  | gaagggtaca | gcatagcaag   | tcttgcaatt  | gtgatgatag  |
| 10741 | ataaccatt   | atgcgcagcc  | actgggcaca | gaatatgcaa   | tgactgcatg  | aattcgtgca  |
| 10801 | tatatcaaaa  | acaagaaccc  | gtaaatgtgc | cagcaattga   | aacaaggatt  | ctggatgatg  |
| 10861 | tgctcagttt  | accgtacgga  | tttgaaatat | attctctgct   | cagccgttgg  | aatcctttaa  |
| 10921 | attttcagcg  | ttcattgcca  | agaggaaaca | ctggaaaaaa   | cgttctagtt  | gtaggccttg  |
| 10981 | gtcctgctgg  | ttttaattta  | gctcatcatt | tgttgaatga   | tgggcataac  | gttattgcca  |
| 11041 | ttgatggact  | aaaaattgag  | cctttgatcg | ataatttcca   | gctaattaaa  | gatttcaaac  |
| 11101 | acgaaaaatt  | gagtgaacgc  | atggcaggag | ggtttggtgg   | ggtggcagaa  | tatggtatta  |
| 11161 | cttctcgggtg | ggataagaat  | tacttaaa   | ttattagatt   | actgctggaa  | agacgtgaga  |

```

11221 atttcgtact ttatggaggc attcgttttg gtggcacgat taatgctgat gacgcgttca
11281 acttggggttt tgatcacatc gccctagcac ttggctctgg taagccacga atgatcaaaa
11341 taaaaaacat actagctcgt ggagtagcga tggcatctga ttttctgatg tcgttacaac
11401 tgactggcgc tcttaaattc gattctatag caaatctgca agttcgtatg ccgatagttg
11461 tcataggtgc ggggcttact gcgattgaca ctgccactga agcttttagcg tattatccaa
11521 ttcaagtaga aaaatttctt cttcgttatg agatattagt tgataagtat ggaaaggact
11581 gtgttgaaaa agattggaca gaagaagagc gcgaaattgc gaatgagttt atatcgcacg
11641 cacaattgat ccgagaaaag caaaagttag caaaaaaaga gaatagagaa ataaaaatat
11701 tagagttaat gcagagcctc gggggagtga aagttatata tagaaaagag ctaaaagatt
11761 caccaagtta tcgattaaat agcgaagagg tgcaaaacgc attatcagaa gggatttact
11821 ttattgaaaa cttagagcca gttgaagttg tgacggataa atataaccat gctgtcactt
11881 aaggggagga c

```

//

```

LOCUS      JAQZAU010000161          9624 bp    dna        linear    ENV 17-MAR-2023
DEFINITION MAG: Wolbachia pipientis isolate wEsol contig_679, whole genome
            shotgun sequence.
ACCESSION  JAQZAU010000161  JAQZAU010000000
VERSION    JAQZAU010000161.1
DBLINK     BioProject: PRJNA929258
            BioSample: SAMN33142973
KEYWORDS   WGS; ENV; Metagenome Assembled Genome; MAG.
SOURCE     Wolbachia pipientis (insect metagenome)
ORGANISM   Wolbachia pipientis
            Bacteria; Pseudomonadota; Alphaproteobacteria; Rickettsiales;
            Anaplasmataceae; Wolbachieae; Wolbachia.
REFERENCE  1  (bases 1 to 9624)
AUTHORS    Fiutek,N., Couger,B.M., Roy,S., de la Torre,J.R. and Connor,E.F.
TITLE      Genomic assessment of the contribution of the Wolbachia
            endosymbiont of Eurosta solidaginis to gall-induction
JOURNAL    International Journal Molecular Sciences
REFERENCE  2  (bases 1 to 9624)
AUTHORS    Fiutek,N., Couger,B.M., Roy,S., de la Torre,J.R. and Connor,E.F.
TITLE      Direct Submission
JOURNAL    Submitted (10-FEB-2023) Biology, San Francisco State University,
            1600 Holloway Ave, San Francisco, CA 94132, USA
COMMENT    ##Genome-Assembly-Data-START##
            Assembly Date      :: JUN-2019
            Assembly Method    :: FLYE v. 06-2019
            Genome Representation :: Full
            Expected Final Version :: Yes
            Genome Coverage    :: 100.0x
            Sequencing Technology :: Illumina HiSeq; PacBio Sequel
            ##Genome-Assembly-Data-END##
FEATURES   Location/Qualifiers
            source              1..9624
                                /organism="Wolbachia pipientis"
                                /mol_type="genomic DNA"
                                /submitter_seqid="contig_679"
                                /isolate="wEsol"
                                /isolation_source="galls on Solidago altissima"
                                /host="Eurosta solidaginis MN-2018-EFC"
                                /db_xref="taxon:955"
                                /environmental_sample
                                /country="USA: Cowling Arboretum, Carleton College,
                                Northfield, MN"
                                /lat_lon="44.48 N 93.13 W"
                                /altitude="280 m"
                                /collection_date="2018-11"
                                /metagenome_source="insect metagenome"
                                /note="metagenomic"

```

```

gene      81..368
          /locus_tag="wEsol_01882"
CDS       81..368
          /locus_tag="wEsol_01882"
          /codon_start=1
          /transl_table=11
          /fullproduct="qcoverage 100 , hcoverage 100 , similarity
100 , identity 100 , evalue 2.60e-56 , alnlength 95 ,
Bacteria , Proteobacteria , WP_006279703.1 MULTISPECIES:
monovalent cation/H(+) antiporter subunit G [Wolbachia]"
          /cog="MnhG COG1320 113 Multisubunit Na+/H+ antiporter,
MnhG subunit"
          /pfam="PhaG_MnhG_YufB"
          /tigr="TIGR01300 CPA3_mnhG_phaG 97 monovalent
cation/proton antiporter, MnhG/PhaG subunit"
          /product="monovalent
cation/H(+) antiporter subunit G"
          /translation="MIGSIFIFLGICLIISNIGVIRFPDFYTRLHAAGITDSSGATL
LLIGFALQNGFSINTVKIVLLIFIIWVANSTNSYILARTHYKVKKKTVKEG"
          /besthit="qcoverage 100 , hcoverage 100 , similarity 100
, identity 100 , evalue 2.60e-56 , alnlength 95 ,
Bacteria , Proteobacteria , WP_006279703.1 MULTISPECIES:
monovalent cation/H(+) antiporter subunit G [Wolbachia]"
gene      370..897
          /locus_tag="wEsol_01883"
CDS       370..897
          /locus_tag="wEsol_01883"
          /codon_start=1
          /transl_table=11
          /fullproduct="qcoverage 100 , hcoverage 100 , similarity
100 , identity 100 , evalue 1.06e-109 , alnlength 175 ,
Bacteria , Proteobacteria , WP_015589497.1 MULTISPECIES:
DUF4040 domain-containing protein [Wolbachia]"
          /pfam="DUF4040 Oxidored_q3 Pfam-B_5378 Pfam-B_14745"
          /tigr="TIGR00940 2a6301s01 793 monovalent cation:proton
antiporter"
          /product="DUF4040
domain-containing protein"
          /translation="MLEILNVVLLLLLLTVTVFIVFSRHLVVSAVLMCVFSSLIALIY
LIMNAPDVAITEASVGAGLSTVFTFAALSLIKNHKVNLSHNPITLFFMFLAVCLSYF
MIQLPDFGSHNAPIHLHVAPYYVENTEKATGIPNIVTAILASFRGYDTFGETIVVFTA
ALCITLILKEEKEND"
          /besthit="qcoverage 100 , hcoverage 100 , similarity 100
, identity 100 , evalue 1.06e-109 , alnlength 175 ,
Bacteria , Proteobacteria , WP_015589497.1 MULTISPECIES:
DUF4040 domain-containing protein [Wolbachia]"
gene      890..1309
          /locus_tag="wEsol_01884"
CDS       890..1309
          /locus_tag="wEsol_01884"
          /codon_start=1
          /transl_table=11
          /pfam="MnhB"
          /fullproduct="qcoverage 100 , hcoverage 100 , similarity
100 , identity 100 , evalue 1.91e-90 , alnlength 139 ,
Bacteria , Proteobacteria , WP_006279705.1 MULTISPECIES:
Na(+)/H(+) antiporter subunit B [Wolbachia]"
          /translation="MIKDPILNAVTFMLMIPFIILFGLYIQFHGDYTPGGGFQAGIIIA
SGIILYSMLFGVSTTLKAIPYSVIRLTNVLGILIYGGTGVATTLLGQNFLSYDILLTN
NRTGQKLGIFLVELGVAFTVCSSMLIIYINFARRKKQ"

```

```

/product="Na(+)/H(+)"
antiporter subunit B"
/besthit="qcoverage 100 , hcoverage 100 , similarity 100
, identity 100 , evalue 1.91e-90 , alnlength 139 ,
Bacteria , Proteobacteria , WP_006279705.1 MULTISPECIES:
Na(+)/H(+) antiporter subunit B [Wolbachia]"
gene 1306..1617
/locus_tag="wEsol_01885"
CDS 1306..1617
/locus_tag="wEsol_01885"
/codon_start=1
/transl_table=11
/fullproduct="qcoverage 100 , hcoverage 100 , similarity
100 , identity 100 , evalue 4.13e-59 , alnlength 103 ,
Bacteria , Proteobacteria , WP_006279706.1 MULTISPECIES:
cation:proton antiporter subunit C [Wolbachia]"
/cog="MnhC COG1006 115 Multisubunit Na+/H+ antiporter,
MnhC subunit"
/pfam="Oxidored_q2"
/tigr="TIGR00941 2a6301s03 104 multicomponent Na+:H+
antiporter, MnhC subunit"
/product="cation:proton
antiporter subunit C"
/translation="MTLYNYTTIIIVLMVLGLYIIINDKNLIKMKMIGVSVFQASVLLFY
ISLGYIKSSLPPILVSNFYSSNPPIPHVLMMLTAIVVGIATFSVGLSIAVKMEEKYGTI
D"
/besthit="qcoverage 100 , hcoverage 100 , similarity 100
, identity 100 , evalue 4.13e-59 , alnlength 103 ,
Bacteria , Proteobacteria , WP_006279706.1 MULTISPECIES:
cation:proton antiporter subunit C [Wolbachia]"
gene 1756..3681
/locus_tag="wEsol_01886"
CDS 1756..3681
/locus_tag="wEsol_01886"
/codon_start=1
/transl_table=11
/pfam="Sigma70_r1_1 Sigma70_r1_2 Sigma70_ner Sigma70_r2
Sigma70_r3 Sigma70_r4"
/fullproduct="qcoverage 100 , hcoverage 100 , similarity
99.8 , identity 99.7 , evalue 0.0 , alnlength 641 ,
Bacteria , Proteobacteria , WP_138265032.1 MULTISPECIES:
RNA polymerase sigma factor RpoD [unclassified
Wolbachia]"
/translation="MSTINDAEDKKKIIKDLVTKSIKGGFITFDDINDKLSDENFSS
DFIDDAISLLQDSGINVLESSEDKEDIPSNSDDSKLDDDDTSPNVTATLVQNDYPVRI
YLQDMSSVKLLSRADIEIEIAKKIESEKHNMRLRAIIETSVTLKVIKVRDDLSNGALLL
REIIDLDAIYNSDFNVVPKEESESESEESAEDVEDSEDAEYCSDDKDGNNEDIS
SVNLNVSILEMESDLLPKVIVALDEIITLTNEALILRKNSKNFSNELENLYNQIWSIA
LQIKLSDAAVARITQELYKINRSITLEEANLIAEARKYDIDRESFYKVYDDVLLKHEL
KKISLLKINENQSSFTGELKNKFLRFIDNSEHIASTLNGIKQHIQEDNVQEFKELIK
RIQKHEREVSEAKQEMIKANLRLVVSIAKKYSKRGLDLLDLIQEGNIGLMKAVDKFDY
KRGYKFSTYGTWWVRQSITRAIPEQSKVVRIPVHMVEIISKINRALRKMTHEMGREPT
LEELSVELTMPLERIRKVMKIARDPVSLEAPT GKDDSSSTFGDCIEDKRVSRPEDAAIL
ADLRGITTNVLATLTPKEERILRMRFGLGKGDKGKEHTLEEVGKIFNVTRERIRQIEAKA
LRKCLKHPSRARKLRGFF"
/product="RNA polymerase
sigma factor RpoD"
/besthit="qcoverage 100 , hcoverage 100 , similarity 99.8
, identity 99.7 , evalue 0.0 , alnlength 641 , Bacteria ,
Proteobacteria , WP_138265032.1 MULTISPECIES: RNA

```

gene polymerase sigma factor RpoD [unclassified Wolbachia]"  
3889..4191  
/locus\_tag="wEsol\_01887"

CDS 3889..4191  
/locus\_tag="wEsol\_01887"  
/codon\_start=1  
/transl\_table=11  
/product="hypothetical protein"  
/translation="MTNKNDNSNSKYRNFYVLGDSLSDNGAIIGILNNLSFAKSVKFD  
DPFYQGSFSNGPTAVEYVAKYLDLDEFKPGWSYSIFWEMPRTARSKLCSFMCNSI"  
/besthit="qcoverage 81 , hcoverage 52.5974025974026 ,  
similarity 97.5 , identity 96.3 , evaluate 5.16e-49 ,  
alnlength 81 , Eukaryota , Arthropoda , GFQ81579.1 GDSL  
family lipase [Trichonephila clavata]"

gene 7294..7839  
/locus\_tag="wEsol\_01888"

CDS 7294..7839  
/locus\_tag="wEsol\_01888"  
/codon\_start=1  
/transl\_table=11  
/product="hypothetical protein"  
/pfam="Lipase\_GDSL"  
/translation="MVATAYDDTKAEVLEQAVSEICNALKVLNEHGVKHVVVANAPE  
VGSIPAFNRDEEARELATKLTESFNAKLANGLDYMKKSTNLEIKAFDLNSKMKSMLSE  
YKSKGLNCQDTCTSNIAHQIGRFKENIKILLKLIFKGELDVHYNPGCSEETLKDYFFF  
DYFHPTAELHHEVGNEVYELI"  
/cog="COG3240 COG3240 370  
Phospholipase/lecithinase/hemolysin"  
/besthit="qcoverage 100 , hcoverage 55.521472392638 ,  
similarity 98.9 , identity 98.3 , evaluate 9.99e-121 ,  
alnlength 181 , Eukaryota , Arthropoda , GFY65264.1  
hypothetical protein TNIN\_37661 [Trichonephila inaurata  
madagascariensis]"

gene complement(8410..9540)  
/locus\_tag="wEsol\_01889"

CDS complement(8410..9540)  
/locus\_tag="wEsol\_01889"  
/codon\_start=1  
/transl\_table=11  
/product="hypothetical protein"  
/translation="MIEAIKLNIGEQYNKTVRDLSQTLESFTDKAEDVAKFVICSDL  
NNYIEPVNKKPSGFFGIFKETFNKILGKDASIQDNDIRNFANDKLPSLAEKITFEYLN  
VLKKISDLEQSKKNQEEHRLYGVNLEDRTASKQEENPLYDLQAGDSGYGSSLNEEHEY  
EDISHYQEKKQKENPLYEQREDLGYGGLLNEEHEYEDISNYQEKKSKILIENSQSSKS  
PKEEPIYATVSKEHIEAKRKRKQKQQPQSLVLPKPPRASQVPKMFMTTGQEVQRQESKV  
VVKDKPAVPPKPNLSRADQKVSTEPKVVEVILKKSAAESKPTVPLKSENQDNRKSAQK  
AAGKAIPKVAATMKGGANREMGSKVKALKEKFEQNQANRKC"  
/besthit="qcoverage 98.936170212766 , hcoverage  
79.8283261802575 , similarity 99.5 , identity 99.2 ,  
evaluate 3.13e-188 , alnlength 372 , Bacteria ,  
Proteobacteria , MBV2145187.1 hypothetical protein  
[Wolbachia endosymbiont of Pissodes strobi]"

# ORIGIN

```

1  ttgatatagc attgttctat gctagcggtta gcttttatatc aactatagca ctaatgagat
61  taatgttggt ttgataatth atgataggat ccatthttcat atthtttaggt atttgtttga
121 taattatttc aatatatagg gtagatcagat ttcctgattt ctatactagg ttacatgcag
181 caggtattac agattctagc ggtgcaacgt tattgttaat tggthtttgc ttgcagaatg
241 gatttttcaat caatactgth aaaatagtht tattaattht tataatatgg gtagctaact
301 caactaatag ctataattht gcgcgcactc attataaagt taagaaaaaa actgttaaag
361 aaggctaagg tgtagaaat attaaatgta gtgttactth tgttgthtact aacagthtac

```

|      |             |             |             |             |             |             |
|------|-------------|-------------|-------------|-------------|-------------|-------------|
| 421  | gtttttatag  | ttttctcgcg  | acatttagtc  | gtaagtgctg  | ttctaattgtg | tgtatttagt  |
| 481  | tcactgattg  | cgcttatata  | cttaattatg  | aatgcacctg  | atgttgcaat  | tactgaagct  |
| 541  | tctgttggtg  | cggggctcag  | tacagttttt  | acgtttgcag  | cactctcctt  | gataaagaat  |
| 601  | cataaagtaa  | atctatctca  | taaccctata  | acgctttttt  | ttatgttatt  | tctggctgta  |
| 661  | tgtttgtcat  | attttatgat  | tcaattgccca | gattttggca  | gccacaatgc  | tccgatccac  |
| 721  | ttgcatgttg  | ctccttatta  | tgtggaaaat  | accgaaaaag  | ctaccggtat  | tcctaataata |
| 781  | gtgacagcta  | ttttggcaag  | ctttcgtggt  | tatgacacgt  | ttggagaaac  | tatagtagtt  |
| 841  | tttactgctg  | cgctttgtat  | aacgttgata  | ttaaaagaag  | aaaaagaaaa  | tgattaaaga  |
| 901  | tccgatatta  | aatgcagtaa  | catttttgat  | gatacctttt  | atcattttat  | ttggtttata  |
| 961  | catacaattt  | cacggtgatt  | acactccggg  | tggaggtttt  | caagcaggaa  | taattattgc  |
| 1021 | ctccgggata  | atattatatt  | caatgctatt  | tgggtgtatct | acaactctaa  | aagcaatacc  |
| 1081 | ttattctgtg  | attagattga  | ctaacgtgtt  | aggtatttta  | atttatggag  | gaacgggcgt  |
| 1141 | tgcaacaact  | ttacttggcc  | aaaatttttt  | atcttatgat  | atcttgttaa  | ccaataatag  |
| 1201 | aaccggtcaa  | aaattaggtg  | tttttttggt  | ggaattaggt  | gtagcattta  | ctgtctgctc  |
| 1261 | ctctatgtta  | attatatata  | taaattttgc  | tcgtaggaaa  | aaacaatgac  | tttatataat  |
| 1321 | tatacgatta  | ttattgtatt  | aatggtgcta  | ggtttatata  | ttattataaa  | cgataaaaaat |
| 1381 | ttaatcaaga  | aaatgatagg  | ggtaagcgtc  | ttccaagcat  | ctgttttggt  | attttacata  |
| 1441 | tctctaggat  | atataaaaag  | ttccttgccct | cctatatagg  | tttcaaattt  | ttattcatat  |
| 1501 | agcaatccta  | taccccatgt  | tttaatgctt  | actgctatag  | tggttggaat  | tgcaacattt  |
| 1561 | tcagttggat  | tatccatagc  | agtaaaaatg  | gaagaaaagt  | atggaacaat  | cgattaagac  |
| 1621 | aagtgtacat  | aaattaacag  | tatcttaaac  | tatatgaagt  | aacaaatagc  | cacaagttaa  |
| 1681 | aagtaaaatt  | atagacttgc  | tcggtgtaag  | tttgtttggt  | aataagaaat  | aaaattataa  |
| 1741 | actataaagg  | taatgatgtc  | aactattaat  | gatgcagaag  | ataagaaaaa  | aattatcaaa  |
| 1801 | gatctggtaa  | ctaagagtat  | aaaaaagggt  | ggttttatca  | cctttgatga  | tataaatgat  |
| 1861 | aaattatcag  | atgaaaattt  | ttcgtctgac  | tttatagatg  | atgctatatc  | tttattgcag  |
| 1921 | gattccggaa  | ttaatgtgct  | tgaaagtagc  | gaagataaag  | aagatattcc  | ttccaacagt  |
| 1981 | gatgatagta  | aacttgatga  | tgatgacaca  | tcgccaaatg  | ttactgcaac  | tttagtacia  |
| 2041 | aatgattatc  | cagtgaggat  | ttattttacaa | gacatgagct  | ccgtaaagct  | tttatcaagg  |
| 2101 | gcagatgaaa  | tcgagatagc  | aaaaaaaaatt | gaatctgaaa  | agcataacat  | gttacgtgca  |
| 2161 | ataattgaaa  | catcagtaac  | attaaagggtg | ataaaagtat  | ggcgtgatga  | tttaagtaat  |
| 2221 | ggagctctct  | tactgagaga  | aattatagat  | ctggatgcaa  | tttataactc  | tgatttttaat |
| 2281 | gtggtaccca  | aagaagaaaag | tgaagagagt  | gaagaaaagtg | ctgaagatgt  | tgaggattct  |
| 2341 | gaggatgttt  | ctgaagatgc  | tgagtactgt  | agtgatgatg  | agaaagacgg  | taataatgaa  |
| 2401 | gatataagtt  | cagtcaattt  | aatgttttct  | attcttgaaa  | tggaagtgga  | cttattgccca |
| 2461 | aaggctcatag | ttgcattgga  | tgagataaatt | actttaacaa  | atgaagcggt  | gatattaaga  |
| 2521 | aaaaatttcta | aaaattttctc | taatgagcta  | gaaaatttgt  | ataatcaaat  | atggtctata  |
| 2581 | gcattacaaa  | ttaagttaag  | tgatgctgct  | ggtgccagaa  | ttacacaaga  | actttataag  |
| 2641 | ataaatagat  | ccattacgct  | tgaagaggct  | aatcttattg  | ctgaggctag  | aaaatacgat  |
| 2701 | atcgatagag  | aaagtttcta  | taaagttttat | gatgacgtgc  | ttttaaaagca | cgaattgaaa  |
| 2761 | aagataagtc  | ttttaaaagat | caatgaaaaat | cagtcctctt  | ttacagggtga | attaaaaaac  |
| 2821 | aaattttttaa | ggttttataga | cgataactct  | gaacatatag  | ctagtacctt  | gaacggtatt  |
| 2881 | aagcagcata  | tacaggaaga  | taacgtacaa  | gaattttaagg | agctaatacaa | gagaatacaa  |
| 2941 | aaacacgaac  | gagaagtctc  | tgaagcaaaag | caagaaaatga | ttaaggctaa  | cttaaggcta  |
| 3001 | gtagttttcca | ttgctaagaa  | gtattcaaaa  | agaggccttg  | atctgcttga  | tttgatacaa  |
| 3061 | gaaggcaata  | ttggtcttat  | gaaggccgtg  | gataagtttg  | attacaaaacg | tgatataaaa  |
| 3121 | ttttcaactt  | atggcacttg  | gtgggtaaga  | caatcaatca  | ctagagcaat  | acctgagcag  |
| 3181 | tctaaagtag  | ttagaatacc  | agttcatatg  | gtggaaaatta | tcagtaaaat  | caacagagca  |
| 3241 | ttaagaaaga  | tgactcatga  | gatgggaaga  | gagccgacgt  | tagaggaatt  | gagtgtagaa  |
| 3301 | ctgacaatgc  | cactggaaaag | aatacgcaaa  | gttatgaaaa  | tagcaaggga  | tccagtaagt  |
| 3361 | cttgaagctc  | caacaggaaa  | agatgatagt  | agtacctttg  | gtgattgtat  | agaagacaag  |
| 3421 | cgagtctcca  | ggccagagga  | tgctgcaata  | cttgctgact  | tgctgtggcat | tacaaccaat  |
| 3481 | gttcttgcaa  | ctttaacacc  | aaaggaagaa  | agaatttttaa | gaatgcgttt  | tggccttggt  |
| 3541 | aaagatggga  | aggaacatac  | cttagaagaa  | gtaggaaaaa  | tttttaattgt | aacacgtgag  |
| 3601 | agaattaggc  | aaatagaggc  | aaaagcactg  | cgcaagttga  | aacatccaag  | ccgtgctaga  |
| 3661 | aaacttagag  | ggttctttta  | agtatacgtg  | tcaagttaag  | agaagctga   | ttttgcccg   |
| 3721 | aaaaagtggg  | gaaaaagtca  | gagcgttttt  | aaaataaaaac | gttttttcaa  | aaaggatatga |
| 3781 | tatgaaggaa  | atgcacaata  | aagtttaaaa  | tgggggttgc  | aaaaaagttg  | caccgctatt  |
| 3841 | tttttttatg  | aatctaataa  | aacaacatgc  | taatctacgg  | taaatattat  | gacaaacaaa  |
| 3901 | aatgacaatt  | ctaattcaaa  | gtatagaaat  | ttttatgttc  | tgggtgatag  | tttatccgat  |
| 3961 | aatggcgcaa  | tcattggaat  | tttaataaac  | ttatcctttg  | caaaaagcgt  | aaagtttgat  |

|      |             |             |             |             |             |             |
|------|-------------|-------------|-------------|-------------|-------------|-------------|
| 4021 | gaccctttttt | atcaaggagg  | atcttttagc  | aatggcccca  | ctgctgttga  | atatgtagca  |
| 4081 | aaatatattag | attttagacga | atttaaacct  | gggtggagtt  | attcaatttt  | ttgggaaatg  |
| 4141 | ccacgaacag  | caaggtcaaa  | actatgcagt  | ttcatgtgca  | acagcatctg  | aaatttttga  |
| 4201 | ccctatttttt | atactcagtt  | gagcagagct  | cacagagtat  | attaactttg  | attggataac  |
| 4261 | ggttgtacag  | gtataaagga  | atcgagatag  | atatagactt  | ccatatatca  | aaatcatcag  |
| 4321 | tatcgaaaaa  | aaatttgatt  | gagccatgtc  | cgtccgtccg  | tccgtccgtt  | aacacgataa  |
| 4381 | cttgagtaaa  | ttttgaggta  | tcttgacgaa  | atttggtatg  | taggttctctg | ggcactcatc  |
| 4441 | tcagatcgct  | atttaaaatg  | aacgatatcg  | gactataacc  | acgcccactt  | tttcgatatc  |
| 4501 | gaaaattttcg | aaaaatcgaa  | aaagtgcgat  | aattcattac  | caaaggcgga  | taaagcgatg  |
| 4561 | aaacttggtg  | cgtgggttga  | acttatgacg  | cagaatagaa  | aataagtaaa  | attttggaca  |
| 4621 | atgggcgtgg  | caccgcccac  | ttttaaaaga  | aggtaattta  | gaagttttgc  | aagctgtaat  |
| 4681 | ttggcagtcg  | ttgaagatat  | catgatgaaa  | tttggcagga  | acgttacttg  | tattactata  |
| 4741 | tgtacgctta  | ataaaaatta  | gcaaaatcgg  | agaacgacca  | cgcccacttt  | aaaaaaaaat  |
| 4801 | ttttttaagt  | gaaattttta  | caaaaaattt  | aatatcttta  | cagtatataa  | gtaaattatg  |
| 4861 | tcaacattca  | actccagtaa  | tgatatggtg  | caacaaaata  | caaaaacaaa  | agaaaatttc  |
| 4921 | aaaatgggcg  | tggctccgcc  | ctttttcatt  | tgatttgtct  | aggatacatt  | taatgccata  |
| 4981 | agtcgaacaa  | atattttacca | atccttgtga  | aatttggtag  | gcgcttagaa  | tctaggacga  |
| 5041 | taactgtttt  | ctgtgaaaaa  | gggcgaaatc  | ggttgaagcc  | acgcccagtt  | tttatacaca  |
| 5101 | gtagatcgtc  | tgtccttccg  | ctcggccggt  | aacacgataa  | cttgagcaaa  | aatcgatata  |
| 5161 | tctttactaa  | actcagttca  | cataattatc  | tgaacacact  | ttgtattcgt  | ataaaaaatg  |
| 5221 | gccgaaatcc  | gactatgacc  | acgcccactt  | tttcgatttc  | gaaaaatacg  | aaaaatgaaa  |
| 5281 | aaaatgccat  | aattctatac  | caaatacgaa  | aaaagggatg  | aaacatggta  | attgcattgg  |
| 5341 | tttattgacg  | caaaatataa  | ctttagaaaa  | aaactttgta  | aaatgggtga  | cacctaccat  |
| 5401 | attaagtaga  | agaaaatgaa  | aaagttctgc  | agggcgaaat  | cgaaagccct  | tagaatcatg  |
| 5461 | gcaggaatac  | tgttcgtggt  | attacatata  | taaataaatt  | agcggtagcc  | gacagattat  |
| 5521 | gttctgggtc  | accctgggtc  | acattttggt  | cgaaatctcg  | aaaacgcctt  | cacatataca  |
| 5581 | actaccacaa  | ctccctttta  | aaattcttat  | taataccttt  | aatttgacac  | ccatattgta  |
| 5641 | caaacacatt  | atagagtcac  | ccctgggtccc | cctttatggc  | gatatatcga  | aatatagaac  |
| 5701 | taaggtccac  | tcccttttta  | aatactcatt  | atcacctttc  | gtttgatact  | cataatgtac  |
| 5761 | aaacgcattc  | tagttgactc  | tgggtccacct | ttataacgat  | atcccgaaaa  | ggcgtccacc  |
| 5821 | tatagaacta  | aggcccaatc  | cctttttaaaa | tactcattaa  | cacctttcat  | ttgatacca   |
| 5881 | tatcgtaaac  | aaattctaaa  | gtcacccctg  | gtccaccttt  | atgggtctcg  | aaaaggcgtc  |
| 5941 | cacctataga  | actaaggccc  | actccctttt  | aaaataactca | ttaacacctt  | tcattttgata |
| 6001 | cccatatcgt  | acaaacaaat  | tctagagtca  | cccctggtcc  | accttttatat | cgatatttcg  |
| 6061 | aaaagccgtc  | cacccataga  | actaaggccc  | actccctttt  | aaaataactca | ttaacacccat |
| 6121 | ttcattttgat | acccatattcg | tacaaacgca  | ttctagagtc  | atcccctggt  | cctcctttat  |
| 6181 | ggcgatatct  | cgaaaaggcg  | tccacctata  | aaactaaggc  | ccactccctt  | ttaaaatact  |
| 6241 | cattaacacc  | tttcattttga | tacccatatac | gtacaaacaa  | attctagagt  | cacccctgggt |
| 6301 | ccaccttttat | ggcgatatct  | cgaaaaggcg  | tccacctata  | gaactaaggc  | ccactccctt  |
| 6361 | ttaaaatact  | cattagcacc  | tttcattttga | tacccatatac | gtacaaacaa  | attctagagt  |
| 6421 | cacccctgggt | ccaccttttat | ggcgatatct  | cgaaaaggcg  | tccacctata  | gaactaaggc  |
| 6481 | ccactccctt  | ttaaaatact  | cattaacacc  | tttcattttga | tacccatatac | gtacaaacaa  |
| 6541 | attctagagt  | cacccctgggt | ccaccttttat | ggcgatatct  | cgaaaaggcg  | tccacctata  |
| 6601 | gaactaaggc  | ccactccctt  | ttaaaatact  | cattaacacc  | tttcattttga | tacccatatac |
| 6661 | gtacaaacaa  | attctagagt  | cacccctgggt | ccaccttttat | ggcgatatct  | cgaaaatgcg  |
| 6721 | tccacctata  | gaactaaggc  | ccactccctt  | ttaaaatact  | cataaccttt  | ctttgatacc  |
| 6781 | catatcgtac  | aaacaaattc  | tagagtcacc  | cctgtccacc  | tttatggcga  | tatctcgaaa  |
| 6841 | aggcgtccac  | ctatagaact  | aaggcccacg  | ccctttttaaa | atactcatta  | agcacctttc  |
| 6901 | atttgatacc  | catatcgtac  | aaacaaattc  | tagagtcacc  | cctgggtccac | ctttatggcg  |
| 6961 | atatctcgaa  | aaggcgtcca  | cctagagaa   | taaggcccac  | gcccttttaa  | aatattcatt  |
| 7021 | agcacctttc  | atttgatacc  | catatcgtac  | aaacaacaca  | ttccagggtt  | accctagggtt |
| 7081 | catttttcta  | catggtgatt  | ttcccttatt  | ttgtctccat  | agctctcaac  | tgagtatgta  |
| 7141 | atgttcgggt  | acacccgaac  | ttagccttcc  | ttacttgttt  | attattttct  | caataaattt  |
| 7201 | cgtttagcta  | accagctaga  | tgcggttaatt | aaacatcatc  | cagatatagg  | taaagaagat  |
| 7261 | ttatttttgca | tcataatcgg  | cggaaatgat  | gttatggttg  | ccactgctta  | tgacgatact  |
| 7321 | aaagcggaag  | aagtgttgga  | acaagcagtg  | agtgaatat   | gtaatgcact  | taaggttcta  |
| 7381 | aatgaacatg  | gtgttaagca  | tgtagtgtgt  | gcaaacgcac  | ctgaagttgg  | ctcaatacca  |
| 7441 | gctttttaata | gagatgaaga  | agcaaggga   | ctagctacga  | agctcacaga  | gagtttcaat  |
| 7501 | gcaaaattgg  | ctaattggctt | agatttatatg | aagaaaagta  | caaactcttga | aataaaaagca |
| 7561 | tttgatctta  | actctaaaaat | gaaaagtatg  | cttagcgaat  | acaagagcaa  | aggtttaaat  |

```

7621 tgtcaagata catgcacatc gaacattgca gaccaaattg ggagatttaa agaaaatata
7681 aaaatactct taaagttgat atttaaaggg gaacttgacg ttcactataa ccctgggtgt
7741 agcgaagaaa cactaaagga ttatttcttt tttgattatt tccatccaac tgcagaactt
7801 catcatgaag ttggtaatga agtgtatgag ttgatttgac acagtttttt gaacattccc
7861 tagatccag tgtccctatg atgtcatccc agtgcttgac actgggaacc agaaaagttt
7921 gcttgtgaac aagcaaacta gcacagaaag tgattacaac attttcgatg agattatatg
7981 gaaaactgga tcccagtgtc tgggcactgg gatgacatcg tttactatgt gccatattgc
8041 aatgttcgta cagctgtgag tcacgcactt tgcttcaata tttgcacatt agccactcct
8101 ctgaacagat acagtcagtt tagctataac ttcctaagtt tgctcacaat ctcttgactt
8161 gaccatatgt ttttttccca aatgttacta tcttcctcct tttcctttct caatttgtgc
8221 aaccattttcc ttaacactta cttgtgtgga aggaggattt ttgctgacat gagatttttg
8281 atcagatttt gctgttatgt gtttcgttgc agatctttta ttctctgtta gaaatgaatg
8341 agattgtttt ttcttcacac gatatccgct tgtgctgctg gggtagtttt gctttcagca
8401 agccgtacat tagcattttcc tgtttgcttg attttgctca aatttttctt ttaatgcctt
8461 tactttactg cccatctcgc gattagctcc tctttcata gtagctgctg ctacttttgg
8521 tatcgctta ccagcagctt tttgtgctga tttcctattg tcttgatttt cagatttttag
8581 tggtagtgta ggtttacttt cagctgattt tttaagaatt acttctacta cttttggctc
8641 tgtgcttact ttttgatcag cacggcttag attttttaggc tttggcggtg ctgcagggtt
8701 atctttgact accactttcg attcttgtct aacttcttga ccagtagtaa acattttttt
8761 tggcacttgc gatgctcttg gtggttttgg tagtacgagg gattgagggt gttgtttctg
8821 cttacgtttt ctttttgcct ctatatgttc ttagaaact gttgcataaa ttggctcttc
8881 tttgggcgat tttgaactct gcgaattttc tattaataatt ttactcttct tctcttgata
8941 atttgatatg tcttcataat catgctcttc atttaataaaa cctccatagc ctaaatcttc
9001 tctctgctca tataaaggat tttccttttg ctttttctct tgataatgtg atatgtcttc
9061 atattcatgc tcttcattta atgaacttcc atagcctgaa tctcctgctt gtagatcata
9121 taaaggattt tcttcttgct ttgacgctgt tctatcctct aagttcactc catacaatct
9181 atgttcctcc tgattttttt tactttgctc taaatctgaa attttcttta aaacatttag
9241 gtattcgaat gttatttttt cagcaagact gggcaattta tcattagcaa aatttcttat
9301 atcgttatcc tgaattgaag catcttttcc caagatttta ttaaagtgtt ccttgaatat
9361 tccaaaaaaa cctgatggct ttttgttcac cggttctata taattattca agtcactaca
9421 tataacaaac ttagctacat cttctgcctt atctgtaaaa ctctctaata tctgggataa
9481 atctctcact gttttattat attgttcacc aatatttttc agctttatag cttctatcaa
9541 ggagtcgaga tttttttata gttctcactt ttaaattggat cattcatact aattacagct
9601 cattatttat taaaatatag atct

```

```

//
LOCUS      JAQZAU010000162                4254 bp    dna        linear    ENV 17-MAR-2023
DEFINITION MAG: Wolbachia pipientis isolate wEsol contig_9944, whole genome
            shotgun sequence.
ACCESSION  JAQZAU010000162 JAQZAU010000000
VERSION    JAQZAU010000162.1
DBLINK     BioProject: PRJNA929258
            BioSample: SAMN33142973
KEYWORDS   WGS; ENV; Metagenome Assembled Genome; MAG.
SOURCE     Wolbachia pipientis (insect metagenome)
ORGANISM   Wolbachia pipientis
            Bacteria; Pseudomonadota; Alphaproteobacteria; Rickettsiales;
            Anaplasmataceae; Wolbachieae; Wolbachia.
REFERENCE  1 (bases 1 to 4254)
AUTHORS    Fiutek,N., Couger,B.M., Roy,S., de la Torre,J.R. and Connor,E.F.
TITLE      Genomic assessment of the contribution of the Wolbachia
            endosymbiont of Eurosta solidaginis to gall-induction
JOURNAL     International Journal Molecular Sciences
REFERENCE  2 (bases 1 to 4254)
AUTHORS     Fiutek,N., Couger,B.M., Roy,S., de la Torre,J.R. and Connor,E.F.
TITLE      Direct Submission
JOURNAL     Submitted (10-FEB-2023) Biology, San Francisco State University,
            1600 Holloway Ave, San Francisco, CA 94132, USA
COMMENT     ##Genome-Assembly-Data-START##
            Assembly Date      :: JUN-2019
            Assembly Method     :: FLYE v. 06-2019

```

Genome Representation :: Full  
Expected Final Version :: Yes  
Genome Coverage :: 100.0x  
Sequencing Technology :: Illumina HiSeq; PacBio Sequel  
##Genome-Assembly-Data-END##

FEATURES

|        | Location/Qualifiers                                                                                                                                                                                                                                                                                                                                                                                                                                                                                                                                                                                                                                           |
|--------|---------------------------------------------------------------------------------------------------------------------------------------------------------------------------------------------------------------------------------------------------------------------------------------------------------------------------------------------------------------------------------------------------------------------------------------------------------------------------------------------------------------------------------------------------------------------------------------------------------------------------------------------------------------|
| source | 1..4254<br>/organism="Wolbachia pipientis"<br>/mol_type="genomic DNA"<br>/submitter_seqid="contig_9944"<br>/isolate="wEsol"<br>/isolation_source="galls on Solidago altissima"<br>/host="Eurosta solidaginis MN-2018-EFC"<br>/db_xref="taxon:955"<br>/environmental_sample<br>/country="USA: Cowling Arboretum, Carleton College, Northfield, MN"<br>/lat_lon="44.48 N 93.13 W"<br>/altitude="280 m"<br>/collection_date="2018-11"<br>/metagenome_source="insect metagenome"<br>/note="metagenomic"                                                                                                                                                           |
| gene   | complement(427..519)<br>/locus_tag="wEsol_01890"                                                                                                                                                                                                                                                                                                                                                                                                                                                                                                                                                                                                              |
| CDS    | complement(427..519)<br>/locus_tag="wEsol_01890"<br>/codon_start=1<br>/transl_table=11<br>/product="hypothetical protein"<br>/translation="MKEKLKKENNSGKEQEEEEKEEQVHKRMK"                                                                                                                                                                                                                                                                                                                                                                                                                                                                                     |
| gene   | complement(559..663)<br>/locus_tag="wEsol_01891"                                                                                                                                                                                                                                                                                                                                                                                                                                                                                                                                                                                                              |
| CDS    | complement(559..663)<br>/locus_tag="wEsol_01891"<br>/codon_start=1<br>/transl_table=11<br>/product="hypothetical protein"<br>/translation="MIYVGMIITIVLCVSAVRERRQRRRIEKENEKG"                                                                                                                                                                                                                                                                                                                                                                                                                                                                                 |
| gene   | 774..1295<br>/locus_tag="wEsol_01892"                                                                                                                                                                                                                                                                                                                                                                                                                                                                                                                                                                                                                         |
| CDS    | 774..1295<br>/locus_tag="wEsol_01892"<br>/codon_start=1<br>/transl_table=11<br>/product="hypothetical protein"<br>/pfam="Pfam-B_29"<br>/translation="MLKEYPPSHISK TIVEMIDLPHVKDNIA SFTLIGEERNWKGATL<br>FVSYNKD KDKPIASTNKQSTYGYVMELTNEGITVVLRF GKLRGIIDSNSALIGKEIVK<br>FQSAELIDKNKYKLSNLIRGQEGTKDATGEKFVLLDDSIISFEVQRGKKFY LKAVTYG<br>DSL DNT EAKVLNN"<br>/besthit="qcoverage 100 , hcoverage 16.2441314553991 ,<br>similarity 100 , identity 100 , evaluate 3.63e-108 ,<br>alnlength 173 , Bacteria , Proteobacteria ,<br>WP_213863573.1 glycoside hydrolase TIM-barrel-like<br>domain-containing protein [Wolbachia endosymbiont of<br>Ceratitis capitata]" |
| gene   | 1482..2684<br>/locus_tag="wEsol_01893"                                                                                                                                                                                                                                                                                                                                                                                                                                                                                                                                                                                                                        |
| CDS    | 1482..2684<br>/locus_tag="wEsol_01893"                                                                                                                                                                                                                                                                                                                                                                                                                                                                                                                                                                                                                        |

```

/codon_start=1
/transl_table=11
/fullproduct="qcoverage 100 , hcoverage 100 , similarity
99.3 , identity 98.8 , evalue 2.20e-269 , alnlength 400 ,
Bacteria , Proteobacteria , WP_038198696.1 multidrug
efflux MFS transporter [Wolbachia pipientis]"
/cog="ProP COG0477 338 Permeases of the major facilitator
superfamily"
/pfam="MFS_2 MFS_1 Pfam-B_3877 TRI12 MFS_3 Sugar_tr
Pfam-B_12481 MFS_2"
/tigr="TIGR00710 efflux_Bcr_CflA 385 drug resistance
transporter, Bcr/CflA subfamily"
/product="multidrug efflux MFS
transporter"
/translation="MKTALSQNIISLIMILSVAIVDMATDLYSVALPSIANYFKVEGS
VVQLTISLNLVGFVAVSGLIYGPLSDHYGRPMMLIGMTIFTLASVMCYIADSIALLIL
IRFIQGTGAGVAGVVGYYAAIRDMYSGSEYSRVISKLNMMVVALSPGIAPVVGSIISHG
YHWKFLFFIMSLAAIAMLIFIYFKLQETLTINKNETSITNITTNIFKQYISIFRNYRF
LGFSAIHGLTFMWLWAYVANYPFIFESMGIEVQYFGYLISIIVIFYIIGTLINRRYVP
KVGVS KM LII GLVLP IISDSL LVYFYFADKLNIFILQTAWIPANIGLALIISNNVTSA
LETIKIGLGS AVL SFCNM MFGAIGIYIVGKFFRYGILPNLLLTIACTIAILMYSQL
KCTEKHRE"
/besthit="qcoverage 100 , hcoverage 100 , similarity 99.3
, identity 98.8 , evalue 2.20e-269 , alnlength 400 ,
Bacteria , Proteobacteria , WP_038198696.1 multidrug
efflux MFS transporter [Wolbachia pipientis]"
gene 2817..2984
/locus_tag="wEsol_01894"
CDS 2817..2984
/locus_tag="wEsol_01894"
/codon_start=1
/transl_table=11
/fullproduct="qcoverage 100 , hcoverage 100 , similarity
100 , identity 100 , evalue 2.77e-31 , alnlength 55 ,
Bacteria , Proteobacteria , WP_155968899.1 MULTISPECIES:
ankyrin repeat domain-containing protein [Wolbachia]"
/cog="Arp COG0666 235 FOG: Ankyrin repeat"
/pfam="Ank_4 Ank_2 Ank Ank_3 Ank_5 Ank_3 Ank"
/product="ankyrin repeat
domain-containing protein"
/translation="MSNLQSINNDWFSAVIKGNTNKVKRLISEGAKVNAVDEYNNTP
LHYAATNGDAEI"
/besthit="qcoverage 100 , hcoverage 100 , similarity 100
, identity 100 , evalue 2.77e-31 , alnlength 55 ,
Bacteria , Proteobacteria , WP_155968899.1 MULTISPECIES:
ankyrin repeat domain-containing protein [Wolbachia]"
gene complement(2991..3302)
/locus_tag="wEsol_01895"
CDS complement(2991..3302)
/locus_tag="wEsol_01895"
/codon_start=1
/transl_table=11
/fullproduct="qcoverage 100 , hcoverage 100 , similarity
100 , identity 100 , evalue 1.60e-74 , alnlength 103 ,
Bacteria , Proteobacteria , WP_155968470.1 transposase
[Wolbachia pipientis]"
/cog="COG3335 COG3335 132 Transposase and inactivated
derivatives"
/pfam="DDE_3 DDE_1"
/product="transposase"

```

```

/translation="MTFKGGCDKEVFNTWLEKMLLPKLPHGTTIVMDNATFHKTPKTK
ELIDNARCRLLYLPTYSPDLNPIEHCWNTIKSRLRPLMHKYTDLQLLVGNTIMEIYHS
F"
/besthit="qcoverage 100 , hcoverage 100 , similarity 100
, identity 100 , evalue 1.60e-74 , alnlength 103 ,
Bacteria , Proteobacteria , WP_155968470.1 transposase
[Wolbachia pipientis]"
gene complement(3502..3849)
/locus_tag="wEsol_01896"
CDS complement(3502..3849)
/locus_tag="wEsol_01896"
/codon_start=1
/transl_table=11
/fullproduct="qcoverage 100 , hcoverage 100 , similarity
100 , identity 100 , evalue 2.74e-74 , alnlength 115 ,
Bacteria;Eukaryota , Proteobacteria;Arthropoda ,
WP_155968342.1 MULTISPECIES: IS630 transposase-related
protein [Wolbachia]"
/cog="COG3415 COG3415 138 Transposase and inactivated
derivatives"
/pfam="HTH_Tnp_IS630 HTH_Tnp_1 HTH_23 HTH_28 HTH_29 HTH_7
CENP-B_N Pfam-B_14738 HTH_8 HTH_17 HTH_24 Pfam-B_2106"
/product="IS630
transposase-related protein"
/translation="MAYSVDLRERAVSMIEKGSKVEVAELLEIGIATLYRWLRKKAA
GESLRPSKNGSFIRKIDPKILEEYVKKNPDHTLAEMKQNLGFGINSIWYRLKQLRITL
KKSYSITISRAQSRR"
/besthit="qcoverage 100 , hcoverage 100 , similarity 100
, identity 100 , evalue 2.74e-74 , alnlength 115 ,
Bacteria;Eukaryota , Proteobacteria;Arthropoda ,
WP_155968342.1 MULTISPECIES: IS630 transposase-related
protein [Wolbachia]"
gene complement(3934..>4254)
/locus_tag="wEsol_01897"
CDS complement(3934..>4254)
/locus_tag="wEsol_01897"
/codon_start=1
/transl_table=11
/fullproduct="qcoverage 100 , hcoverage 94.6428571428571
, similarity 100 , identity 100 , evalue 2.64e-69 ,
alnlength 106 , Bacteria , Proteobacteria , ONI55866.1
DALR anticodon binding domain protein [Wolbachia
pipientis wUni]"
/cog="ArgS COG0018 577 Arginyl-tRNA synthetase"
/pfam="DALR_1"
/tigr="TIGR00456 argS 569 arginine--tRNA ligase"
/product="DALR anticodon binding domain
protein"
/translation="ELPTADPSLLRTGGELFLIKTLAKWPDVVEIAARLCEPHRITFY
LLEVAEAFHVLWGYGKSDLNMRFILEDNLNLTAAARMFLVQALAHVIASGLSIFNIEPL
EEMS"
/besthit="qcoverage 100 , hcoverage 94.6428571428571 ,
similarity 100 , identity 100 , evalue 2.64e-69 ,
alnlength 106 , Bacteria , Proteobacteria , ONI55866.1
DALR anticodon binding domain protein [Wolbachia
pipientis wUni]"

ORIGIN
1 cctcgctga gtatctgaaa tcaacacaaa aagcagatag ataggtagtt caaaatgcac
61 cgcgtaaaaa atgggttaaga gcctgttttc cgtcttcagc cttcaaagat cgcccaaaca
121 ttaatcgagg acttggttta cgtttacgcc taaccacgac ttcacgtcaa caatgtcaca

```

|      |             |             |             |             |             |            |
|------|-------------|-------------|-------------|-------------|-------------|------------|
| 181  | tgaccaccct  | acattacgaa  | tcattatcac  | aattcccacg  | ttgtactgat  | catattat   |
| 241  | tatat       | ctgct       | tatat       | acatcttctc  | aactctattg  | ttttcttt   |
| 301  | tattctttct  | ttcttttctc  | tttcttttct  | tttctttttt  | ctttctttcc  | gtttcttctc |
| 361  | ttttcttttt  | cttttctttt  | ttttcttttc  | ttttcttttg  | ctttctttct  | ctttctttac |
| 421  | ttttctttat  | ttcattctct  | tgtgtacttg  | ttcttctctc  | ttttcttctt  | cctcttggtc |
| 481  | cttcccgcta  | ttgttctcct  | tcttcagttt  | ctctttcatc  | acttcttttt  | ttcttttatc |
| 541  | tcttctcctt  | tttttcttct  | accctttctc  | attttctttt  | tctatcctcc  | ttctccttgg |
| 601  | tcttctctct  | ctcacagccg  | acacacacag  | tactatcggt  | attatcattc  | ccacatatat |
| 661  | cattatat    | ctcctgattt  | cttcttttctg | ctttttctct  | tattttgtgc  | tattcctgtc |
| 721  | tgctcttctc  | ttctgtttct  | tcttctctac  | tcttcttttc  | tcttcagtca  | cttatgctga |
| 781  | aggaataccc  | tccttctcat  | atcagcaaaa  | ccatcgtaga  | aatgatagat  | ttaccgcatg |
| 841  | ttaaagataa  | tattgcaagc  | tttactttta  | ttgggtgagga | aaggaattgg  | aaggaggcaa |
| 901  | cactctttgt  | ttcgtacaac  | gataaggatt  | ataagcctat  | cgcaagcaca  | aataagcagt |
| 961  | ctacttacgg  | atatgtaatg  | gaattaacaa  | atgagggaat  | tacagtagtg  | ttgcgttttg |
| 1021 | gtaagctgcg  | aggaattatc  | gattcaaatt  | cagcattaat  | cggaaaagag  | atagtgaat  |
| 1081 | tccagagtgc  | tgaacttata  | gataaaaaata | aatataagct  | tagcaaccta  | attagagggc |
| 1141 | aagagggcac  | taaagatgcc  | acaggtgaaa  | aatttggttct | acttgatgat  | tcaataatat |
| 1201 | ctttcgaagt  | gcaaagggga  | aaaaagtttt  | acctaaaagc  | agtgacttac  | ggtgattcat |
| 1261 | tggacaatac  | ggaggcgaag  | gtcctaaca   | attgatgctc  | aatattttaa  | gcttaaagtg |
| 1321 | aataattgaa  | gataagggtat | tgaaattcgt  | gcttttcatg  | attttagctt  | aagatttcag |
| 1381 | tgtccgctac  | tcgaatgaca  | tcgtttacta  | tgtaacattg  | tacttatact  | aatgaaaaaa |
| 1441 | atacattata  | attaagtata  | tttaatccag  | taaatcatta  | agtgaaaaca  | gctctttcgc |
| 1501 | aaaatatcat  | ttctcttatt  | atgatattgt  | ctgtagcaat  | tgtcgatatg  | gcaactgacc |
| 1561 | tatactcagt  | tgcactacca  | agcattgcca  | attattttta  | agtagaaggc  | agtgtagtgc |
| 1621 | agcttacaat  | tagcttgaat  | ctagttggat  | ttgcggtatc  | tggattaatt  | tatggtccat |
| 1681 | tatcggacca  | ttatggtagg  | cgtccaatga  | tgctgattgg  | tatgacaatt  | tttactttgg |
| 1741 | caagtgtcat  | gtgttatata  | gccgacagca  | ttgcgctctt  | gatactaatt  | cgcttcatac |
| 1801 | aaggaacagg  | ggctggtggt  | gcaggtggtg  | ttgggtatgc  | agcaataagg  | gatatgtact |
| 1861 | cgggtagtga  | atactcgaga  | gtaatttcaa  | aattaaatat  | ggttggtggca | ctctcacctg |
| 1921 | ggatagctcc  | agtgggtggc  | agttatataa  | tttcacatgg  | ttatcattgg  | aaatttttgt |
| 1981 | tttttattat  | gtcactcgcg  | gcaattgcta  | tgcttatttt  | tatttacttt  | aagttacaag |
| 2041 | aaacactcac  | tataaataaa  | aatgaaacca  | gtataactaa  | cataactact  | aatatcttca |
| 2101 | agcaatatat  | atcaatat    | agaaattatc  | gtttccttgg  | gttttcagcc  | attcatggat |
| 2161 | taactttcat  | gtggcttttg  | gcatacgttg  | ctaactatcc  | tttcatat    | gaatcaatgg |
| 2221 | gcattgaagt  | acagtatttt  | ggctaccta   | tatcgatcat  | agtcata     | tacataattg |
| 2281 | gaactttaat  | taatagaagg  | tatgtaccaa  | aagtaggggt  | tagcaaaatg  | ctaataatag |
| 2341 | gtttggtggt  | accgataata  | tccgatagtt  | tattggtata  | tttttatttc  | gcggacaagt |
| 2401 | tgaatatatt  | cattcttcaa  | actgcttgga  | ttccagccaa  | tatcggactt  | gcattaataa |
| 2461 | taagcaataa  | cgtaacttct  | gcttttagaaa | cgatcaaagg  | tatagggctt  | ggtagtgcag |
| 2521 | tcctctcatt  | ctgcaatatg  | atgtttgggg  | ctattggaat  | atatatagta  | ggaaaatttt |
| 2581 | ttcgctatgg  | tattttacca  | aatttactat  | taacaatagc  | atgctctaca  | attgcaattc |
| 2641 | ttatgtacag  | ccagctcaaa  | tgtactgaaa  | aacacaggga  | ataaccatta  | tttgctgat  |
| 2701 | ccagagctca  | tgggttatta  | atgactttat  | catgataata  | taattttaca  | gggggtgaga |
| 2761 | gctcatagat  | tattaacgac  | tttatcataa  | caatatagtt  | ttacaggagg  | tatgggatga |
| 2821 | gtaatttaca  | aagtataaat  | aatgattgggt | tttctgctgt  | tataaaagggt | aatactaata |
| 2881 | aagtaaagcg  | tctaataagt  | gaaggagcta  | agggtaatgc  | agtagatgaa  | tataacaaca |
| 2941 | ctcctttaca  | ttatgctgct  | acgaatggcg  | atgcagagat  | atagtatttt  | ctaaaatgaa |
| 3001 | tgataaattt  | ccattatggt  | attaccaacc  | aaaagttgta  | agtctgtata  | tttatgcatt |
| 3061 | aaaggtctga  | ggcggttttt  | gatggtat    | caacaatgct  | ctataggggt  | caaatctggt |
| 3121 | gaatatggtg  | gtagatagag  | caaacggcat  | ctagcattat  | ctattaactc  | ctttgttttg |
| 3181 | ggagttttat  | ggaatgtggc  | attgtccata  | actattgtag  | taccatgtgg  | caatttaggt |
| 3241 | aataacatct  | tctctaacca  | tgtattgaat  | acctctttgt  | cacaccacc   | tttgaaagtc |
| 3301 | attggtgcaa  | taaatctctt  | tccaatccac  | ccgcctatta  | tactgattct  | ctctcgtttt |
| 3361 | cttcttgcaa  | tatctgcata  | aattttcttt  | cctattggag  | cacgtccata  | ctctcggtat |
| 3421 | aacctattat  | caactcctgc  | ttcatctata  | tataagatgc  | tggaatggtc  | tatttttgag |
| 3481 | attttatcggt | taaatcgctg  | cctatcttct  | tgattgctgct | cttgatatag  | tgtaactttt |
| 3541 | ttttaaagta  | attcttagct  | gtttcagcct  | ataccaaatt  | gaattttattc | caaatccaag |
| 3601 | attttggttc  | atctctgcca  | gcgtatgatc  | tggtattcttt | ttaacatatt  | cttcgagtat |
| 3661 | ttttgggtct  | atttttcgaa  | taaagctgcc  | gtttttcgat  | ggccttaggc  | tttcaccagc |
| 3721 | ggctttcttt  | cttaaccagc  | ggtacagagt  | tgctattcct  | atctccaaaa  | gctctgccac |

```
3781 ctcaaccttt gacttccctt tttctatcat cgatactgcc ctttccctta aatccacact
3841 atacgccatt ataactcaaa tagcttatta tacctttatc atttactttg ggaagtacta
3901 tattttgatc attacatatt gtaacaaaaa aaatcaactc atttcttcta acggctctat
3961 attaaagata gaaagtccag aagcgatgac gtgtgctaag gcctgcacga gaaacattct
4021 tgcagcgggtg aggtttaagt tgtcttccag tatgaaacgc atgtttaaat cactcttgcc
4081 ataccccat aaaacgtgaa acgcttctgc aacttcaagt aagtagaaag taattctgtg
4141 tggctcacia agccttgctg caatttctac cacatctggc cactttgcta aggtttttat
4201 gaggaagagc tctccacctg tccttaaaag tgaaggatct gctgttggga gctc
```

//
