# Supplementary material for: Genomic Assessment of the Contribution of the Wolbachia Endosymbiont of Eurosta solidaginis to Gall Induction
Source: MDPI journal article supplement (doi:10.3390/ijms24119613), 2023-06-01
Supplement: s1 [file s1]

**Supplemental Table S8. KEGG EC and KO numbers enzymes for S-adenosyl L-methionine synthesis**

| <b>KEGG EC Number</b>      | <b>KEGG KO Number</b>          | <b>Enzyme</b>                                                                                                                                                                                              | <b>Abbreviation</b> |
|----------------------------|--------------------------------|------------------------------------------------------------------------------------------------------------------------------------------------------------------------------------------------------------|---------------------|
| EC: 2.7.2.4, EC: 1.1.1.3   | K00928, K12524, K12525, K12526 | aspartate kinase,<br>bifunctional aspartokinase / homoserine dehydrogenase 1,<br>bifunctional aspartokinase / homoserine dehydrogenase 2,<br>bifunctional diaminopimelate decarboxylase / aspartate kinase | lysC, metL, lysAC   |
| EC:1.2.1.11                | K00133                         | aspartate-semialdehyde dehydrogenase                                                                                                                                                                       | asd                 |
| EC: 2.3.1.31, EC: 2.3.1.46 | K00641, K00651                 | homoserine O-acetyltransferase/O-succinyltransferase,<br>homoserine O-succinyltransferase/O-acetyltransferase                                                                                              | metX, metA          |
| EC: 2.5.1.48               | K01739                         | cystathionine gamma-synthase                                                                                                                                                                               | metB                |
| EC: 2.5.1.-                | K10764                         | O-succinylhomoserine sulfhydrylase                                                                                                                                                                         | metZ                |
| EC: 2.5.1.49               | K01770, K12506                 | O-acetylhomoserine (thiol)-lyase                                                                                                                                                                           | metY                |
| EC: 2.8.1.16               | K23975, K23976                 | L-aspartate semialdehyde sulfurtransferase,<br>L-aspartate semialdehyde sulfurtransferase ferredoxin                                                                                                       |                     |
| EC: 2.6.1.7, EC: 4.4.1.13  | K00816, K01760, K14155         | kynurenine---oxoglutarate transaminase / cysteine-S-conjugate<br>beta-lyase / glutamine---phenylpyruvate transaminase,<br>cysteine-S-conjugate beta-lyase                                                  | CCBL, metC, patB    |
| EC: 2.1.1.5                | K00544                         | betaine-homocysteine S-methyltransferase                                                                                                                                                                   | BHMT                |
| EC: 2.1.1.10               | K00547                         | homocysteine S-methyltransferase                                                                                                                                                                           | mmuM, BHMT2         |
| EC: 2.1.1.13, EC: 1.5.1.54 | K00548, K24042                 | 5-methyltetrahydrofolate--homocysteine methyltransferase,<br>methionine synthase / methylenetetrahydrofolate reductase<br>(NADH)                                                                           | metH, yitJ          |
| EC: 2.1.1.14               | K00549                         | 5-methyltetrahydropteroyltriglutamate--homocysteine<br>methyltransferase                                                                                                                                   | metE                |
| EC: 2.5.1.6                | K00789                         | S-adenosylmethionine synthetase                                                                                                                                                                            | metK                |
