# Supplementary material for: Genomic Assessment of the Contribution of the Wolbachia Endosymbiont of Eurosta solidaginis to Gall Induction
Source: MDPI journal article supplement (doi:10.3390/ijms24119613), 2023-06-01
Supplement: s1 [file s1]

**Supplemental Table S6. KEGG EC and KO numbers for IAA synthesis enzymes**

| <b>KEGG EC Number</b>                 | <b>KEGG KO Number</b>                  | <b>Enzyme</b>                                                                                                                    | <b>Abbreviation</b>     |
|---------------------------------------|----------------------------------------|----------------------------------------------------------------------------------------------------------------------------------|-------------------------|
| EC:1.13.12.3                          | K00466                                 | tryptophan 2-monoxygenase                                                                                                        | iaaH                    |
| EC: 3.5.1.-, EC:3.5.1.4               | K21801, K01426                         | indoleacetamide hydrolase , amidase                                                                                              | iaaM, amiE              |
| EC:2.6.1.27, EC:2.6.1.99, EC: 1.4.3.2 | K14265, K00838, K16903, K03334         | tryptophan aminotransferase, aromatic amino acid amino transferase, L-tryptophan pyruvate aminotransferase, L-amino acid oxidase | Tam1, ARO8, TAA1, IL4I1 |
| EC:1.14.13.168                        | K11816                                 | indole-3-pyruvate monooxygenase                                                                                                  | YUCCA                   |
| EC:4.1.1.74                           | K04103                                 | indolepyruvate decarboxylase                                                                                                     | idpC                    |
| EC:1.2.1.3, EC:1.2.3.7                | K00128, K14085, K00149, K11817, K22417 | aldehyde dehydrogenase (NAD+), indole-3-acetaldehyde oxidase                                                                     | ALDH, AA01_2, AA04      |
| EC:1.14.14.156                        | K11812, K11813                         | tryptophan N-monooxygenase                                                                                                       | CYP79B1_2, CYP79B3      |
| EC:4.8.1.3                            | K11868                                 | indoleacetaloxime dehydratase                                                                                                    | CYP71A13                |
| EC:3.5.5.1                            | K10501                                 | nitrilase                                                                                                                        |                         |
| EC4.1.1.28, EC:4.1.1.105              | K01593                                 | aromatic L-amino acid / L-tryptophan decarboxylase                                                                               | DDC, TDC                |
| EC:1.4.3.4, EC:1.4.3.22               | K00274, K11182                         | monoamine oxidase, diamine oxidase                                                                                               | MAO, AOC1               |
| EC:4.2.1.84                           | K10721, K20807                         | nitrile hydratase subunit alpha, subunit beta                                                                                    | nthA, nthB              |
| EC:1.14.14.45                         | K11818                                 | aromatic aldoxime N-monooxygenase                                                                                                | CYP83B1                 |
| EC:4.4.1.-                            | K11819                                 | S-alkyl-thiohydroximate lyase                                                                                                    | SUR1                    |
| EC:2.4.1.195                          | K11820                                 | N-hydroxythioamide S-beta-glucosyltransferase                                                                                    | UTGZ4B1                 |
| EC:2.8.2.24                           | K11821                                 | aromatic desulfoglucosinolate sulfotransferase                                                                                   | ST5A, SOT16             |
| EC:3.2.1.147                          | K10237                                 | myrosinase                                                                                                                       |                         |
