# Supplementary material for: Genomic Assessment of the Contribution of the Wolbachia Endosymbiont of Eurosta solidaginis to Gall Induction
Source: Int J Mol Sci. 2023 Jun 1;24(11):9613. doi: 10.3390/ijms24119613 (PMC10253641; doi:10.3390/ijms24119613)
Supplement: Supplementary file 1 [file ijms-24-09613-s001.zip]

Archive with 10 entries (10 files):
- Supplemental Figures S1 & S2.pdf
- Supplemental File S1 Annotated genome of wEsol.pdf
- Supplemental Table S1 - Reasons for including contigs and chimera coordinates.xlsx
- Supplemental Table S2 -wolbachia-inserts-eurosta.xlsx
- Supplemental Table S3 - MEP Pathway.xlsx
- Supplemental Table S4 - methionine.xlsx
- Supplemental Table S5 - Cytokinin and Adenine Salvage Enzymes.pdf
- Supplemental Table S6 - IAA Synthesis Enzymes.pdf
- Supplemental Table S7 - MEP Enzymes.pdf
- Supplemental Table S8 - SAM Enzymes.pdf
