# Supplementary material for: Genomic Assessment of the Contribution of the Wolbachia Endosymbiont of Eurosta solidaginis to Gall Induction
Source: Int J Mol Sci. 2023 Jun 1;24(11):9613. doi: 10.3390/ijms24119613 (PMC10253641; doi:10.3390/ijms24119613)
Supplement: Supplementary file 1 [file ijms-24-09613-s001.zip › Supplemental Table S1 - Reasons for including contigs and chimera coordinates.xlsx]

## Sheet: Sheet1
Supplemental Table S1. wEsol contigs - reasons for inclusion in genome and chimera coordinates
	Reasons of inclusion in genome			Chimeric contigs (start and stop coordinates of Wolbachia portion)
contig id	BusyBee	Blast Identity	annotation and coverage patterns	start	stop
10007	yes
10300	yes
10723	yes
11120	yes
11580	yes
12340	yes
12505	yes
12536	yes
13076	yes
14176	yes
14296	yes
14687	yes
15719	yes
15818	yes
16892	yes
17836	yes
18195	yes
18291	yes
18651	yes
19356	yes
19940	yes
20599	yes
20751	yes
21001	yes
22294	yes
23028	yes
23078	yes
23080	yes
25003	yes
2547	yes
26490	yes
26953	yes
28785	yes
29171	yes
29338	yes
29641	yes
30611	yes
3090	yes
3091	yes
31005	yes
31115	yes
31598	yes
31868	yes
32067	yes
32109	yes
32754	yes
32781	yes
33092	yes
33195	yes
33339	yes
33766	yes
34043	yes
34079	yes
34592	yes
34920	yes
35600	yes
36250	yes
36397	yes
36686	yes
36894	yes
37018	yes
37429	yes
37626	yes
38164	yes
38312	yes
39139	yes
39992	yes
40194	yes
40278	yes
40280	yes
40849	yes
41869	yes
41988	yes
42626	yes
4280	yes
42877	yes
43004	yes
43512	yes
43520	yes
43628	yes
44164	yes
44519	yes
44903	yes
44927	yes
45117	yes
45189	yes
45501	yes
45739	yes
45754	yes
46807	yes
47070	yes
47189	yes
48052	yes
49027	yes
49146	yes
50097	yes
50425	yes
50652	yes
50662	yes
51520	yes
51892	yes
51942	yes
52887	yes
52895	yes
53491	yes
53607	yes
54614	yes
54882	yes
54966	yes
55085	yes
55246	yes
55544	yes
55758	yes
55920	yes
55946	yes
56709	yes
57018	yes
57100	yes
57228	yes
57438	yes
57772	yes
57833	yes
58570	yes
58918	yes
58959	yes
59038	yes
59165	yes
59279	yes
59417	yes
59864	yes
60337	yes
60792	yes
60820	yes
6581	yes
6763	yes
7859	yes
7860	yes
7864	yes
7865	yes
7919	yes
8674	yes
41019	yes			46807	109318
58088	yes			1	41299
6087	yes			1	11891
9944	yes			1400	5653
40541		yes
639			yes
47541			yes
14972			yes
11070			yes	1	4767
12111			yes	1	2076
1398			yes	2119	4194
20779			yes	1	11607
24028			yes	65889	80456
24238			yes	38529	43250
24440			yes	1	16303
29885			yes	16223	25822
35289			yes	1	15051
4612			yes	7092	18123
50450			yes	24124	30802
55434			yes	26281	27483
679			yes	4843	14466
