# Supplementary material for: Genomic Assessment of the Contribution of the Wolbachia Endosymbiont of Eurosta solidaginis to Gall Induction
Source: Int J Mol Sci. 2023 Jun 1;24(11):9613. doi: 10.3390/ijms24119613 (PMC10253641; doi:10.3390/ijms24119613)
Supplement: Supplementary file 1 [file ijms-24-09613-s001.zip › Supplemental Table S2 -wolbachia-inserts-eurosta.xlsx]

## Sheet: Supplemental Table 8 -wolbachia
Supplemental Table S2. Eurosta solidaginis contigs with evidence of insertion of wEsol DNA
contig id	contig length	number of wEsol CDS inserted	total number of bp of wEsol inserts
10237	35927	1	447
11565	84270	3	913
1196	10427	6	2295
12789	40361	4	3318
13245	54298	1	867
13885	32346	2	7545
14292	16790	1	183
14723	37521	10	7739
1485	168868	1	243
16075	14905	2	489
16308	28580	2	420
20550	30243	1	1377
21309	10369	4	2695
21855	11232	3	2720
22077	14581	8	2581
22259	51534	1	342
22502	73086	2	1122
22563	57937	3	1786
23128	904	1	194
23206	124317	2	1180
24341	2474	1	276
24821	184016	5	2525
25333	11029	2	642
25418	108068	1	306
26421	23963	10	7893
26542	16708	1	393
26643	49861	3	4072
27609	14099	6	9733
28070	48557	13	8212
29104	64745	10	7636
29589	69473	5	8132
29643	47568	1	228
29866	4856	1	246
30296	18410	2	1248
30810	15956	1	279
32291	15069	1	213
35407	109123	1	171
35533	41655	2	629
36102	258765	1	921
37744	172227	1	228
39247	17541	9	5059
39984	12092	1	204
40768	26294	1	183
410	99277	2	1021
4341	41311	1	300
43509	24779	1	252
44339	41814	1	423
44568	44699	19	8548
45004	7695	5	3371
45401	103771	4	2919
45894	23672	1	234
4613	7278	1	174
47972	20738	1	192
4799	30166	1	858
48032	37742	1	510
48358	25385	1	231
48888	42674	1	261
49117	10395	1	390
50251	27238	4	1365
50290	29367	6	3142
53922	35455	2	750
55959	22605	3	1007
57712	26838	1	507
57777	41532	2	1159
59967	80853	4	831
629	167867	6	4063
6505	310167	3	1575
7144	26690	1	219
7161	121944	3	2172
801	71288	3	1081
839	98343	4	2769
9514	24750	1	780
9866	116525	5	2910
scaf13749	234248	1	144
scaf3134	125992	2	621
11119	98446	1	300
12396	31016	1	444
15278	18837	1	516
16327	19675	1	975
18481	61510	1	249
21039	57099	1	639
21211	54741	1	489
24795	96591	1	162
24938	37382	1	468
25045	91461	1	366
2575	179191	3	1380
35497	42846	1	288
43601	77400	1	693
