# Supplementary material for: Genomic Assessment of the Contribution of the Wolbachia Endosymbiont of Eurosta solidaginis to Gall Induction
Source: Int J Mol Sci. 2023 Jun 1;24(11):9613. doi: 10.3390/ijms24119613 (PMC10253641; doi:10.3390/ijms24119613)
Supplement: Supplementary file 1 [file ijms-24-09613-s001.zip › Supplemental Table S3 - MEP Pathway.xlsx]

## Sheet: sup-mep-comp
Supplemental Table S3 - MEP Pathway enzymes present in Wolbachia strains
Green shaded rows indicate strains with a complete pathway starting with 1-deoxy-D-xylulose-5-phosphate
								EC:2.7.1.7	EC:1.1.1.267	EC:2.7.7.60/EC:4.6.1.12	EC:2.7.1.148	EC:1.17.7.1/EC:1.17.7.3	EC:1.17.7.4	KEGG EC number
Host Phylum	Host Class	Host Order	Host Family	Host Species	Wolbachia Strain	Supergroup	Protein File Name	dxs	dxr	ispDF	ispE	ispG, gcpE	ispH, lytB	Gene name
Arthropoda	Insecta	Diptera	Culicidae	Aedes_albopictus	wAlbB	B	GCF_004795415.1_ASM479541v1_protein.faa		WP_006013920.1	WP_006014527.1	WP_006013700.1		WP_096560649.1
Arthropoda	Insecta	Diptera	Culicidae	Aedes_aegypti	wMel	B	GCF_000242415.2_ASM24241v3_protein.faa		WP_006013920.1	WP_006014527.1	WP_006013700.1		WP_039950661.1
Arthropoda	Malacostraca	Isopoda	Armidillidae	Armadillidium_vulgare	wVulC	B	GCF_001027565.1_ASM102756v1_protein.faa		WP_047759708.1	WP_047758800.1	WP_047758822.1		WP_047759225.1
Arthropoda	Arachnida	Pseudoscorpiones	Atemnidae	Atemnus_politus	wApol	S	GCF_013309895.1_ASM1330989v1_protein.faa		WP_174132960.1		WP_174132626.1		WP_174133849.1
Arthropoda	Insecta	Hemiptera	Aleyrodidae	Bemisia_tabaci	China 1	B	GCF_003999585.1_ASM399958v1_protein.faa		WP_127463561.1	WP_127463935.1	WP_127464197.1		WP_127463880.1
Nematoda	Chromadorea	Rhabditidia	Onchocercidae	Brugia_malayi	wBm	D	GCF_000008385.1_ASM838v1_protein.faa		WP_011256380.1	WP_083750419.1		WP_011256979.1	WP_011256248.1
Nematoda	Chromadorea	Rhabditidia	Onchocercidae	Brugia_pahangi	wBp	D	GCF_012030695.1_ASM1203069v1_protein.faa		WP_167895949.1	WP_167895865.1	WP_011256374.1		WP_011256248.1
Arthropoda	Insecta	Hymenoptera	Formicidae	Cardiocondyla_obscurior	wCobs	A	GCF_902713635.1_WoCaobscurior_wCobs-BR2009-alpha_v1.0_protein.faa		WP_174516133.1	WP_155969285.1	WP_174516001.1		WP_010963148.1
Arthropoda	Insecta	Lepidoptera	Carposinidae	Carposina_sasakii	wCauA	A	GCF_006542295.1_ASM654229v1_protein.faa		WP_015589315.1	WP_015589406.1	WP_015589090.1		WP_015589482.1
Arthropoda	Insecta	Hymenoptera	Agaonidae	Ceratosolen_solmsi	wCsol	A	GCF_017869155.1_ASM1786915v1_protein.faa		WP_015589315.1	WP_209452407.1	WP_015589090.1		WP_209452543.1
Arthropoda	Insecta	Diptera	Calliphoridae	Chrysomya_megacephala	wMeg	B	GCF_008245065.1_ASM824506v1_protein.faa		WP_149168887.1	WP_012481959.1	WP_149168870.1		WP_007302221.1
Arthropoda	Insecta	Hemiptera	Cimicidae	Cimex_hemipterus_W.massiliensis	wChem-PL13	T	GCF_014771645.1_ASM1477164v1_protein.faa		WP_191111192.1	WP_191110955.1	WP_191110918.1		WP_191111568.1
Arthropoda	Insecta	Hemiptera	Cimicidae	Cimex_lectularius	wCle	F	GCF_000829315.1_ASM82931v1_protein.faa		WP_041045038.1	WP_041046276.1	WP_041045129.1	WP_041045189.1	WP_041046188.1
Nematoda	Chromadorea	Rhabditidia	Onchocercidae	Cruorifilaria_tuberocauda	wCtub	J	GCF_013365475.1_ASM1336547v1_protein.faa		WP_175814177.1	WP_175813900.1	WP_175814183.1		WP_175813972.1
Arthropoda	Insecta	Siphonaptera	Pulicidae	Ctenocephalides_felis	wCfeJ	F	GCF_012277315.1_ASM1227731v1_protein.faa		WP_168456113.1	WP_174855506.1	WP_168456122.1		WP_168456231.1
Arthropoda	Insecta	Siphonaptera	Pulicidae	Ctenocephalides_felis	wcfeT	E	GCF_012277295.1_ASM1227729v1_protein.faa		WP_168464227.1	WP_168464571.1	WP_168463926.1		WP_168464875.1
Arthropoda	Insecta	Diptera	Culicidae	Culex_molestus	wPip_mol	B	GCF_000723225.2_Wolbachia_endosymbiont_wPip_Mol_of_Culex_molestus_protein.faa			WP_012481959.1	WP_007302685.1	WP_007302669.1	WP_007302221.1
Arthropoda	Insecta	Diptera	Culicidae	Culex_pipiens_molestus	wPip	B	GCF_000208785.1_ASM20878v1_protein.faa		WP_007302736.1	WP_012481959.1	WP_007302685.1	WP_007302669.1	WP_007302221.1
Arthropoda	Insecta	Diptera	Culicidae	Culex_quinquefasciatus	wPipPel	B	GCF_000073005.1_ASM7300v1_protein.faa		WP_007302736.1	WP_012481959.1	WP_007302685.1	WP_007302669.1	WP_007302221.1
Arthropoda	Malacostraca	Isopoda	Cyclistidae	Cylisticus_convexus	wCon	B	GCF_003344345.1_ASM334434v1_protein.faa		WP_114517078.1	WP_179947486.1			WP_114516919.1
Arthropoda	Insecta	Hemiptera	Dactylopiidae	Dactylopius_coccus	wDacB	B	GCF_001648015.1_ASM164801v1_protein.faa		WP_064085754.1	WP_064085914.1	WP_064085304.1	WP_064085268.1	WP_064085287.1
Arthropoda	Insecta	Hemiptera	Liviidae	Diaphorina_citri	wDi	B	GCF_000331595.1_wACP3_protein.faa		WP_026092667.1	WP_017531901.1	WP_017532636.1	WP_017532653.1	WP_015588050.1
Nematoda	Chromadorea	Rhabditidia	Onchocercidae	Dipetalonema_caudispina	wDcau	J	GCF_013365495.1_ASM1336549v1_protein.faa		WP_175809566.1	WP_175809187.1	WP_175809572.1		WP_175809266.1
Nematoda	Chromadorea	Rhabditidia	Onchocercidae	Dirofilaria_immitis	wDimm	C	GCF_013365455.1_ASM1336545v1_protein.faa		WP_175818378.1	WP_175818681.1	WP_175818383.1
Arthropoda	Insecta	Diptera	Drosophilidae	Drosophila_ananassae	wAna	A	GCF_008033215.1_ASM803321v1_protein.faa		WP_007548967.1	WP_007549062.1	WP_006280386.1		WP_012673399.1
Arthropoda	Insecta	Diptera	Drosophilidae	Drosophila_incompta	wInc cu	A	GCF_001758565.1_ASM175856v1_protein.faa		WP_070356952.1	WP_083250487.1		WP_070356735.1	WP_010963148.1
Arthropoda	Insecta	Diptera	Drosophilidae	Drosophila_mauritiana	wMau	B	GCF_004795975.1_ASM479597v1_protein.faa		WP_015587658.1	WP_015588128.1	WP_015588475.1		WP_015588050.1
Arthropoda	Insecta	Diptera	Drosophilidae	Drosophila_melanogaster	wMel	A	GCF_000008025.1_ASM802v1_protein.faa		WP_010962970.1	WP_010963060.1		WP_010962374.1	WP_010963148.1
Arthropoda	Insecta	Diptera	Drosophilidae	Drosophila_santomea	wSan	A	GCF_005862095.1_ASM586209v1_protein.faa		WP_070356952.1	WP_138264756.1	WP_138264930.1		WP_138265040.1
Arthropoda	Insecta	Diptera	Drosophilidae	Drosophila_sechellia	wSh	A	GCF_014354315.1_ASM1435431v1_protein.faa		WP_015589315.1	WP_015589406.1	WP_015589090.1		WP_015589482.1
Arthropoda	Insecta	Diptera	Drosophilidae	Drosophila_simulans	wAu	A	GCF_000953315.1_Wau001_protein.faa		WP_095742779.1	WP_095742814.1			WP_095742875.1
Arthropoda	Insecta	Diptera	Drosophilidae	Drosophila_simulans	wHa	A	GCF_000376605.1_ASM37660v1_protein.faa		WP_015589315.1	WP_015589406.1			WP_015589482.1
Arthropoda	Insecta	Diptera	Drosophilidae	Drosophila_simulans	wNo	B	GCF_000376585.1_ASM37658v1_protein.faa		WP_015587658.1	WP_015588128.1	WP_015588475.1	WP_015588459.1	WP_015588050.1
Arthropoda	Insecta	Diptera	Drosophilidae	Drosophila_simulans	wRi	A	GCF_000022285.1_ASM2228v1_protein.faa		WP_007548967.1	WP_007549062.1		WP_006280490.1	WP_012673399.1
Arthropoda	Insecta	Diptera	Drosophilidae	Drosophila_subpulchrella	wSpc	A	GCF_002300525.1_ASM230052v1_protein.faa		WP_007548967.1	WP_044471288.1	WP_006280386.1		WP_012673399.1
Arthropoda	Insecta	Diptera	Drosophilidae	Drosophila_suzukii	wSuzi	A	GCF_000333795.1_ASM33379v2_protein.faa		WP_007548967.1	WP_044471288.1		WP_006280490.1	WP_012673399.1
Arthropoda	Insecta	Diptera	Drosophilidae	Drosophila_teissieri	wTei	A	GCF_005862135.1_ASM586213v1_protein.faa		WP_070356952.1	WP_138264756.1	WP_138264930.1		WP_138265040.1
Arthropoda	Insecta	Diptera	Drosophilidae	Drosophila_yakuba	wYak	A	GCF_005862115.1_ASM586211v1_protein.faa		WP_070356952.1	WP_138264756.1	WP_138264930.1		WP_138265040.1
Arthropoda	Entognatha	Entomobryomorpha	Isotomidae	Folsomia_candida	Berlin	E	GCF_001931755.2_ASM193175v2_protein.faa		WP_110409489.1	WP_110409516.1	WP_110409827.1		WP_110410327.1
Arthropoda	Insecta	Diptera	Glossinidae	Glossina_morsitans_morsitans	wGmm	A	GCF_000689175.1_wGmm_version4_protein.faa			WP_038249396.1	WP_038249466.1	WP_038249439.1
Arthropoda	Insecta	Hymenoptera	Agaonidae	Kradibia_gibbosae	wKgib	A	GCF_016031645.1_ASM1603164v1_protein.faa			WP_015589406.1	WP_015589090.1		WP_015589482.1
Arthropoda	Insecta	Hymenoptera	Delphacidae	Laodelphax_striatellus	wStri	B	GCF_007115015.1_ASM711504v1_protein.faa		WP_063631256.1	WP_063630878.1	WP_063631144.1		WP_063630894.1
Arthropoda	Insecta	Hymenoptera	Figitidae	Leptopilina_clavipes	wLcla	B	GCF_006334525.1_ASM633452v1_protein.faa		WP_139686439.1	WP_139686758.1	WP_010406717.1		WP_139686676.1
Nematoda	Chromadorea	Rhabditidia	Onchocercidae	Litomosoides_brasiliensis	wLbra	D	GCF_013366805.1_ASM1336680v1_protein.faa		WP_175938144.1	WP_175939191.1	WP_175938562.1		WP_175938298.1
Arthropoda	Chromadorea	Rhabditidia	Onchocercidae	Litomosoides_sigmodontis	wLsig	D	GCF_013365435.1_ASM1336543v1_protein.faa		WP_175837844.1	WP_175838556.1	WP_175837835.1		WP_175837267.1
Arthropoda	Chromadorea	Rhabditidia	Onchocercidae	Madathamugadia_hiepei	wMhie	F	GCF_013366855.1_ASM1336685v1_protein.faa		WP_175937015.1	WP_175937644.1	WP_175937059.1		WP_175937690.1
Arthropoda	Insecta	Hymenoptera	Pteromalidae	Muscidifurax_uniraptor	wUni	A	GCF_000174095.1_wUni_1.0_protein.faa		WP_006279862.1		WP_006279212.1	WP_006279519.1	WP_006279598.1
Arthropoda	Insecta	Hymenoptera	Pteromalidae	Nasonia_oneida	wOneA1	A	GCF_009012935.1_ASM901293v1_protein.faa		WP_151807810.1	WP_151808090.1	WP_006280386.1		WP_151807548.1
Arthropoda	Insecta	Hymenoptera	Pteromalidae	Nasonia_vitripennis	wVitA	A	GCF_001983615.1_ASM198361v1_protein.faa		WP_077188384.1	WP_077188604.1	WP_077188591.1		WP_077188446.1
Arthropoda	Insecta	Hymenoptera	Pteromalidae	Nasonia_vitripennis	wVitB	B	GCF_000204545.1_WVB_1.0_protein.faa		WP_010406676.1	WP_029237641.1	WP_010406717.1	WP_010401631.1	WP_010406995.1
Arthropoda	Insecta	Hymenoptera	Delphacidae	Nilaparvata_lugens	wLug	B	GCF_007115045.1_ASM711504v1_protein.faa		WP_143689558.1	WP_029237641.1	WP_143689603.1		WP_143689348.1
Arthropoda	Insecta	Hemiptera	Apidae	Nomada_ferruginata	wNfle	A	GCF_001675785.1_ASM167578v1_protein.faa		WP_065094655.1	WP_065106873.1	WP_065094815.1	WP_065094678.1	WP_065106647.1
Arthropoda	Insecta	Hymenoptera	Apidae	Nomada_flava	wNfla	A	GCF_001675695.1_ASM167569v1_protein.faa		WP_065094655.1	WP_065094628.1	WP_065094815.1	WP_065095332.1	WP_065094716.1
Arthropoda	Insecta	Hymenoptera	Apidae	Nomada_leucophthalma	wNleu	A	GCF_001675715.1_ASM167571v1_protein.faa		WP_065094655.1	WP_065094628.1	WP_065094815.1	WP_065095332.1	WP_065094716.1
Arthropoda	Insecta	Hymenoptera	Apidae	Nomada_panzeri	wNpa	A	GCF_001675775.1_ASM167577v1_protein.faa		WP_065094655.1	WP_065094628.1	WP_065094815.1	WP_065094678.1	WP_065094716.1
Nematoda	Chromadorea	Rhabditidia	Onchocercidae	Onchocerca_ochengi	wOo	C	GCF_000306885.1_ASM30688v1_protein.faa				WP_014869191.1
Nematoda	Chromadorea	Rhabditidia	Onchocercidae	Onchocerca_volvulus	wOv	C	GCF_000530755.1_W_O_volvulus_Cameroon_v3_protein.faa				WP_025264133.1
Arthropoda	Chromadorea	Rhabditidia	Geometridae	Operophtera_brumata	wOb	B	GCF_001266585.1_ASM126658v1_protein.faa		WP_052264991.1	WP_052264975.1	WP_007302685.1		WP_007302221.1
Arthropoda	Insecta	Lepidoptera	Aphididae	Pentalonia_nigronervosa	WolPenNig	M	GCF_014534705.1_ASM1453470v1_protein.faa		WP_188153758.1	WP_188153439.1	WP_188152634.1		WP_188153489.1
Arthropoda	Insecta	Hemiptera	Plutellidae	Plutella_australiana	wAus	B	GCF_002318985.1_ASM231898v1_protein.faa		WP_052264991.1	WP_052264975.1	WP_007302685.1		WP_007302221.1
Arthropoda	Insecta	Lepidoptera	Trichogrammatidae	Trichogramma_pretiosum	wTpre	B	GCF_001439985.1_wTPRE_1.0_protein.faa		WP_068651251.1	WP_068652217.1	WP_068651362.1	WP_068651445.1	WP_068652003.1
Arthropoda	Insecta	Hymenoptera	Agaonidae	Wiebesia_pumilae	wWpum	A	GCF_017869285.1_ASM1786928v1_protein.faa		WP_070356952.1	WP_209472538.1	WP_209472850.1		WP_209473359.1
Nematoda	Insecta	Hymenoptera	Onchocercidae	Wuchereria_bancrofti	wWb	D	GCF_002204235.1_ASM220423v1_protein.faa		WP_088415293.1	WP_088414334.1	WP_088415282.1	WP_088414941.1	WP_088414470.1
							number of strains	0	58	59	55	21	59
							proportion of strains		0.921	0.937	0.873	0.333	0.937
