# Supplementary material for: Genomic Assessment of the Contribution of the Wolbachia Endosymbiont of Eurosta solidaginis to Gall Induction
Source: Int J Mol Sci. 2023 Jun 1;24(11):9613. doi: 10.3390/ijms24119613 (PMC10253641; doi:10.3390/ijms24119613)
Supplement: Supplementary file 1 [file ijms-24-09613-s001.zip › Supplemental Table S4 - methionine.xlsx]

## Sheet: methionine-table4
Supplemental Table S4 - Cysteine - Methionine Metabolism Pathway enzymes prsent in Wolbachia strains (Aspartate and L-Homoserine to S-adenosyl-L-methionine (SAM))
								EC:2.1.1.11	EC:2.1.1.5 EC:2.1.1.10	EC:2.8.1.16	EC: 2.7.2.4 EC:1.1.1.3	EC:2.3.1.46 EC:2.3.1.31	EC:2.5.1.48	EC:4.4.1.13	EC:2.1.1.14	EC:2.1.1.13	EC:2.5.1.16	EC:2.5.1.49	EC:2.5.1.-	KEGG EC number
Host Phylum	Host Class	Host Order	Host Family	Host Species	Strain	Supergroup	Protein File Name	asd	BHMT mmuM	L-aspartate semialdehyde sulfurtransferase	lysC, metL	metA metX	metB	metC, patB	metE	metH	metK	metY	metZ	gene name
Arthropoda	Insecta	Diptera	Culicidae	Aedes_albopictus	wAlbB	B	GCF_004795415.1_ASM479541v1_protein.faa	WP_006015092.1			WP_006013324.1			WP_006013396.1			WP_006012172.1
Arthropoda	Insecta	Diptera	Culicidae	Aedes_egypti	wMel	B	GCF_000242415.2_ASM24241v3_protein.faa	WP_006015092.1			WP_006013324.1			WP_006013396.1			WP_006012172.1
Arthropoda	Malacostraca	Isopoda	Armidillidae	Armadillidium_vulgare	wVulC	B	GCF_001027565.1_ASM102756v1_protein.faa	WP_047758858.1			WP_047758796.1			WP_047758845.1			WP_047759339.1
Arthropoda	Arachnida	Pseudoscorpiones	Atemnidae	Atemnus_politus	wApol	S	GCF_013309895.1_ASM1330989v1_protein.faa	WP_174133982.1			WP_174134226.1			WP_174132955.1			WP_174132672.1
Arthropoda	Insecta	Hemiptera	Aleyrodidae	Bemisia_tabaci	China 1	B	GCF_003999585.1_ASM399958v1_protein.faa	WP_127463817.1			WP_127463912.1			WP_127464168.1			WP_127464094.1
Nematoda	Chromadorea	Rhabditidia	Onchocercidae	Brugia_malayi	wBm	D	GCF_000008385.1_ASM838v1_protein.faa	WP_011256244.1			WP_041571569.1			WP_011256691.1			WP_011256896.1
Nematoda	Chromadorea	Rhabditidia	Onchocercidae	Brugia_pahangi	wBp	D	GCF_012030695.1_ASM1203069v1_protein.faa	WP_011256244.1			WP_041571569.1			WP_167895801.1			WP_167896141.1
Arthropoda	Insecta	Hymenoptera	Formicidae	Cardiocondyla_obscurior	wCobs	A	GCF_902713635.1 (cardiocondyla_protein.faa)	WP_010962945.1			WP_155969028.1			WP_155969347.1			WP_151807781.1
Arthropoda	Insecta	Lepidoptera	Carposinidae	Carposina_sasakii	wCauA	A	GCF_006542295.1_ASM654229v1_protein.faa	WP_141456680.1			WP_015589292.1			WP_012673299.1			WP_141456803.1
Arthropoda	Insecta	Hymenoptera	Agaonidae	Ceratosolen_solmsi	wCsol	A	GCF_017869155.1_ASM1786915v1_protein.faa	WP_209452418.1			WP_015589292.1			WP_209452470.1			WP_174516991.1
Arthropoda	Insecta	Diptera	Calliphoridae	Chrysomya_megacephala	wMeg	B	GCF_008245065.1_ASM824506v1_protein.faa	WP_149168683.1			WP_007302299.1			WP_149168860.1			WP_149168794.1
Arthropoda	Insecta	Hemiptera	Cimicidae	Cimex_hemipterus_W.massiliensis	wChem-PL13	T	GCF_014771645.1_ASM1477164v1_protein.faa	WP_191111425.1			WP_191111627.1			WP_191111238.1			WP_191110818.1
Arthropoda	Insecta	Hemiptera	Cimicidae	Cimex_lectularius	wCle	F	GCF_000829315.1_ASM82931v1_protein.faa	WP_041046224.1			WP_041044957.1			WP_041045332.1
Nematoda	Chromadorea	Rhabditidia	Onchocercidae	Cruorifilaria_tuberocauda	wCtub	J	GCF_013365475.1_ASM1336547v1_protein.faa	WP_175813974.1			WP_175814267.1			WP_175814189.1			WP_175814192.1
Arthropoda	Insecta	Siphonaptera	Pulicidae	Ctenocephalides_felis	wCfeJ	F	GCF_012277315.1_ASM1227731v1_protein.faa	WP_168455410.1			WP_168455723.1			WP_168455275.1			WP_168455282.1
Arthropoda	Insecta	Siphonaptera	Pulicidae	Ctenocephalides_felis	wcfeT	E	GCF_012277295.1_ASM1227729v1_protein.faa	WP_168464662.1			WP_168464493.1
Arthropoda	Insecta	Diptera	Culicidae	Culex_molestus	wPip_mol	B	GCF_000723225.2_Wolbachia_endosymbiont_wPip_Mol_of_Culex_molestus_protein.faa	WP_007302138.1			WP_007302299.1			WP_012481742.1			WP_007302511.1
Arthropoda	Insecta	Diptera	Culicidae	Culex_pipiens_molestus	wPip	B	GCF_000208785.1_ASM20878v1_protein.faa	WP_029237554.1			WP_007302299.1			WP_012481742.1			WP_007302511.1
Arthropoda	Insecta	Diptera	Culicidae	Culex_quinquefasciatus	wPipPel	B	GCF_000073005.1_ASM7300v1_protein.faa	WP_007302138.1			WP_007302299.1			WP_012481742.1			WP_007302511.1
Arthropoda	Malacostraca	Isopoda	Cyclistidae	Cylisticus_convexus	wCon	B	GCF_003344345.1_ASM334434v1_protein.faa	WP_114517655.1			WP_114517675.1			WP_114517065.1			WP_114517827.1
Arthropoda	Insecta	Hemiptera	Dactylopiidae	Dactylopius_coccus	wDacB	B	GCF_001648015.1_ASM164801v1_protein.faa	WP_064085326.1			WP_064085906.1			WP_064085812.1			WP_064085981.1
Arthropoda	Insecta	Hemiptera	Liviidae	Diaphorina_citri	wDi	B	GCF_000331595.1_wACP3_protein.faa	WP_017532206.1			WP_017531877.1			WP_017532611.1			WP_017532466.1
Nematoda	Chromadorea	Rhabditidia	Onchocercidae	Dipetalonema_caudispina	wDcau	J	GCF_013365495.1_ASM1336549v1_protein.faa	WP_175809258.1			WP_175809478.1			WP_175809623.1			WP_175809620.1
Nematoda	Chromadorea	Rhabditidia	Onchocercidae	Dirofilaria_immitis	wDimm	C	GCF_013365455.1_ASM1336545v1_protein.faa	WP_175818628.1			WP_175818475.1			WP_175818391.1			WP_175818394.1
Arthropoda	Insecta	Diptera	Drosophilidae	Drosophila_ananassae	wAna	A	GCF_008033215.1_ASM803321v1_protein.faa	WP_012673309.1			WP_041582659.1			WP_012673299.1			WP_007548829.1
Arthropoda	Insecta	Diptera	Drosophilidae	Drosophila_incompta	wInc cu	A	GCF_001758565.1_ASM175856v1_protein.faa	WP_012673309.1			WP_041582659.1			WP_012673299.1			WP_007548829.1
Arthropoda	Insecta	Diptera	Drosophilidae	Drosophila_mauritiana	wMau	B	GCF_004795975.1_ASM479597v1_protein.faa				WP_070357059.1			WP_070356942.1			WP_070356739.1
Arthropoda	Insecta	Diptera	Drosophilidae	Drosophila_melanogaster	wMel	A	GCF_000008025.1_ASM802v1_protein.faa	WP_015587973.1			WP_015588097.1			WP_015588432.1			WP_015588328.1
Arthropoda	Insecta	Diptera	Drosophilidae	Drosophila_santomea	wSan	A	GCF_005862095.1_ASM586209v1_protein.faa	WP_010962945.1			WP_010962950.1			WP_010962928.1			WP_010962389.1
Arthropoda	Insecta	Diptera	Drosophilidae	Drosophila_sechellia	wSh	A	GCF_014354315.1_ASM1435431v1_protein.faa	WP_010962945.1			WP_010962950.1			WP_138264751.1			WP_138264797.1
Arthropoda	Insecta	Diptera	Drosophilidae	Drosophila_simulans	wAu	A	GCF_000953315.1_Wau001_protein.faa	WP_010962945.1			WP_015589292.1			WP_012673299.1			WP_015588789.1
Arthropoda	Insecta	Diptera	Drosophilidae	Drosophila_simulans	wHa	A	GCF_000376605.1_ASM37660v1_protein.faa	WP_095742786.1			WP_010962950.1			WP_038199223.1			WP_010082253.1
Arthropoda	Insecta	Diptera	Drosophilidae	Drosophila_simulans	wNo	B	GCF_000376585.1_ASM37658v1_protein.faa	WP_010962945.1			WP_015589292.1			WP_012673299.1			WP_015588789.1
Arthropoda	Insecta	Diptera	Drosophilidae	Drosophila_simulans	wRi	A	GCF_000022285.1_ASM2228v1_protein.faa	WP_015587973.1			WP_015588097.1			WP_015588432.1			WP_015588328.1
Arthropoda	Insecta	Diptera	Drosophilidae	Drosophila_subpulchrella	wSpc	A	GCF_002300525.1_ASM230052v1_protein.faa	WP_012673309.1			WP_041582659.1			WP_012673299.1			WP_007548829.1
Arthropoda	Insecta	Diptera	Drosophilidae	Drosophila_suzukii	wSuzi	A	GCF_000333795.1_ASM33379v2_protein.faa	WP_012673309.1			WP_041582659.1			WP_012673299.1			WP_007548829.1
Arthropoda	Insecta	Diptera	Drosophilidae	Drosophila_teissieri	wTei	A	GCF_005862135.1_ASM586213v1_protein.faa	WP_010962945.1			WP_010962950.1			WP_138264751.1			WP_138264797.1
Arthropoda	Insecta	Diptera	Drosophilidae	Drosophila_yakuba	wYak	A	GCF_005862115.1_ASM586211v1_protein.faa	WP_010962945.1			WP_010962950.1			WP_138264751.1			WP_138264797.1
Arthropoda	Entognatha	Entomobryomorpha	Isotomidae	Folsomia_candida	Berlin	E	GCF_001931755.2_ASM193175v2_protein.faa	WP_110409899.1			WP_110410595.1			WP_110409726.1			WP_110409933.1
Arthropoda	Insecta	Diptera	Glossinidae	Glossina_morsitans_morsitans	wGmm	A	GCF_000689175.1_wGmm_version4_protein.faa	WP_038249847.1			WP_038250691.1						WP_038249060.1
Arthropoda	Insecta	Hymenoptera	Agaonidae	Kradibia_gibbosae	wKgib	A	GCF_016031645.1_ASM1603164v1_protein.faa	WP_010962945.1			WP_015589292.1						WP_182282475.1
Arthropoda	Insecta	Hymenoptera	Delphacidae	Laodelphax_striatellus	wStri	B	GCF_007115015.1_ASM711504v1_protein.faa	WP_063630768.1			WP_063630849.1			WP_063631105.1			WP_019236911.1
Arthropoda	Insecta	Hymenoptera	Figitidae	Leptopilina_clavipes	wLcla	B	GCF_006334525.1_ASM633452v1_protein.faa	WP_010402896.1			WP_139686724.1			WP_139686501.1			WP_139686592.1
Nematoda	Chromadorea	Rhabditidia	Onchocercidae	Litomosoides_brasiliensis	wLbra	D	GCF_013366805.1_ASM1336680v1_protein.faa	WP_175938307.1			WP_175939409.1			WP_175938155.1			WP_175938608.1
Arthropoda	Chromadorea	Rhabditidia	Onchocercidae	Litomosoides_sigmodontis	wLsig	D	GCF_013365435.1_ASM1336543v1_protein.faa	WP_175837276.1			WP_175837366.1			WP_175837874.1			WP_175837646.1
Arthropoda	Chromadorea	Rhabditidia	Onchocercidae	Madathamugadia_hiepei	wMhie	F	GCF_013366855.1_ASM1336685v1_protein.faa	WP_175937008.1			WP_175937150.1			WP_175937047.1
Arthropoda	Insecta	Hymenoptera	Pteromalidae	Muscidifurax_uniraptor	wUni	A	GCF_000174095.1_wUni_1.0_protein.faa							WP_006279739.1			WP_006279561.1
Arthropoda	Insecta	Hymenoptera	Pteromalidae	Nasonia_oneida	wOneA1	A	GCF_009012935.1_ASM901293v1_protein.faa	WP_010962945.1			WP_151807792.1			WP_151807999.1			WP_151807781.1
Arthropoda	Insecta	Hymenoptera	Pteromalidae	Nasonia_vitripennis	wVitA	A	GCF_001983615.1_ASM198361v1_protein.faa	WP_012673309.1			WP_077188380.1			WP_077188331.1			WP_006279561.1
Arthropoda	Insecta	Hymenoptera	Pteromalidae	Nasonia_vitripennis	wVitB	B	GCF_000204545.1_WVB_1.0_protein.faa	WP_010402896.1			WP_029237635.1			WP_010407418.1
Arthropoda	Insecta	Hymenoptera	Delphacidae	Nilaparvata_lugens	wLug	B	GCF_007115045.1_ASM711504v1_protein.faa	WP_143689894.1			WP_143689308.1			WP_143689588.1			WP_143689155.1
Arthropoda	Insecta	Hemiptera	Apidae	Nomada_ferruginata	wNfle	A	GCF_001675785.1_ASM167578v1_protein.faa	WP_010962945.1			WP_065095287.1			WP_065106750.1			WP_065106847.1
Arthropoda	Insecta	Hymenoptera	Apidae	Nomada_flava	wNfla	A	GCF_001675695.1_ASM167569v1_protein.faa	WP_012673309.1			WP_065095287.1			WP_065094919.1			WP_065094688.1
Arthropoda	Insecta	Hymenoptera	Apidae	Nomada_leucophthalma	wNleu	A	GCF_001675715.1_ASM167571v1_protein.faa	WP_012673309.1			WP_065095287.1			WP_065094919.1			WP_065094688.1
Arthropoda	Insecta	Hymenoptera	Apidae	Nomada_panzeri	wNpa	A	GCF_001675775.1_ASM167577v1_protein.faa	WP_012673309.1			WP_065094391.1			WP_065094919.1			WP_065094688.1
Nematoda	Chromadorea	Rhabditidia	Onchocercidae	Onchocerca_ochengi	wOo	C	GCF_000306885.1_ASM30688v1_protein.faa	WP_014868862.1			WP_014869113.1			WP_044135510.1			WP_014869201.1
Nematoda	Chromadorea	Rhabditidia	Onchocercidae	Onchocerca_volvulus	wOv	C	GCF_000530755.1_W_O_volvulus_Cameroon_v3_protein.faa	WP_025264362.1			WP_025264076.1			WP_025264139.1			WP_014869201.1
Arthropoda	Chromadorea	Rhabditidia	Geometridae	Operophtera_brumata	wOb	B	GCF_001266585.1_ASM126658v1_protein.faa	WP_052264832.1			WP_007302299.1			WP_019236355.1			WP_019236911.1
Arthropoda	Insecta	Lepidoptera	Aphididae	Pentalonia_nigronervosa	WolPenNig	M	GCF_014534705.1_ASM1453470v1_protein.faa	WP_188153559.1			WP_188152619.1			WP_188153236.1			WP_188152939.1
Arthropoda	Insecta	Hemiptera	Plutellidae	Plutella_australiana	wAus	B	GCF_002318985.1_ASM231898v1_protein.faa	WP_052264832.1			WP_007302299.1			WP_019236355.1			WP_019236911.1
Arthropoda	Insecta	Lepidoptera	Trichogrammatidae	Trichogramma_pretiosum	wTpre	B	GCF_001439985.1_wTPRE_1.0_protein.faa	WP_068652270.1			WP_068652115.1			WP_068651415.1
Arthropoda	Insecta	Hymenoptera	Agaonidae	Wiebesia_pumilae	wWpum	A	GCF_017869285.1_ASM1786928v1_protein.faa	WP_010962945.1			WP_010962950.1			WP_209473240.1			WP_209472680.1
Nematoda	Insecta	Hymenoptera	Onchocercidae	Wuchereria_bancrofti	wWb	D	GCF_002204235.1_ASM220423v1_protein.faa	WP_088414462.1			WP_088415270.1			WP_088414486.1			WP_088414544.1
							number of strains	61	0	0	62	0	0	60	0	0	58	0	0
							proportion of strains	0.968254	0	0	0.984127	0	0	0.952381	0	0	0.920635	0	0
